# Supplementary material for: Affected cell types for hundreds of Mendelian diseases revealed by analysis of human and mouse single-cell data
Source: eLife. 2024 Jan 10;13:e84613. doi: 10.7554/eLife.84613 (PMC10830129; doi:10.7554/eLife.84613)
Supplement: Figure 1—figure supplement 1—source data 1. [file elife-84613-fig1-figsupp1-data1.xlsx]

## Sheet: Figure 1–figure supplement 1
Affected tissue	Number of diseases with any likely affected cell type	Number of diseases with no likely affected cell type
Skeletal muscle	178	937
Bone marrow	93	319
Spleen	48	152
Lung	48	181
Tongue	19	99
Trachea	4	55
