# Supplementary material for: Affected cell types for hundreds of Mendelian diseases revealed by analysis of human and mouse single-cell data
Source: eLife. 2024 Jan 10;13:e84613. doi: 10.7554/eLife.84613 (PMC10830129; doi:10.7554/eLife.84613)
Supplement: Figure 1—figure supplement 3—source data 1. [file elife-84613-fig1-figsupp3-data1.xlsx]

## Sheet: Figure 1–figure supplement 3
Number of disease genes	Number of tissue-affecting diseases with any likely affected cell type	Number of tissue-affecting diseases with no likely affected cell type
1	262	1080
2	46	90
3	19	29
4	16	10
5	15	6
6	14	10
7	5	4
8	1	1
9	3	4
10≤	9	21
