# Supplementary material for: Affected cell types for hundreds of Mendelian diseases revealed by analysis of human and mouse single-cell data
Source: eLife. 2024 Jan 10;13:e84613. doi: 10.7554/eLife.84613 (PMC10830129; doi:10.7554/eLife.84613)
Supplement: Figure 1—figure supplement 4—source data 1. [file elife-84613-fig1-figsupp4-data1.xlsx]

## Sheet: Figure 1–figure supplement 4A
FDR of PrEDiCT scores	Expert curation (1=Affected, 0=Unaffected, NA=Undetermined)
0.562286	0
0.934	0
0.984	0
0.288	0
0.048	1
0.995	0
0.064	1
0.885	0
0.994	0
0.999	0
0.985	0
0	1
0.908	0
0.5852	0
1	0
0	1
0.909697	0
1	0
0.988	0
0.739	0
0.499429	0
0	0
0	0
0.981	0
0.439714	0
0.807	0
0.96	0
0.997	0
0.999	0
0.997	0
0.999	0
0.969	0
0.945	0
0.845217	0
0.156	0
0.925	0
0.992	1
0	1
0.024	0
0.5496	0
0.999	0
0.934	0
0.6456	0
0.977	0
0.974667	0
0.4224	0
0	0
1	0
0.168	0
0.991	0
0.893333	0
0.999	0
0.986	0
0.32	0
0.895789	0
0.815	0
0.915	0
0.915	0
0.808421	0
0.3	0

## Sheet: Figure 1–figure supplement 4B
Cell type likely affected by disease (1=Yes, 0=No)	Expert curation (1=Affected, 0=Unaffected, NA=Undetermined)
1	1
1	1
1	1
1	1
1	0
1	0
0	1
1	1
1	0
1	0
