# Supplementary material for: Affected cell types for hundreds of Mendelian diseases revealed by analysis of human and mouse single-cell data
Source: eLife. 2024 Jan 10;13:e84613. doi: 10.7554/eLife.84613 (PMC10830129; doi:10.7554/eLife.84613)
Supplement: Figure 1—source data 1. [file elife-84613-fig1-data1.xlsx]

## Sheet: Figure 1B
PrEDiCT scores
0.427377
1.05946
-0.930506
-0.964527
-0.101995
0.0560482
2.18778
0.250159
-0.478558
-0.284362
0.0963723
-0.964527
-0.964527
-0.964527
1.94655
-0.370217
-0.332537
-0.321645
-0.335536
-0.231228
3.62447
-0.336973
-0.313074
-0.337577
-0.249912
-0.311536
0.710024
-0.257128
-0.321708
-0.337577
-0.337577
-0.310492
1.12518
0.338409
-1.25506
-1.27496
0.808779
0.18373
1.12076
0.229251
0.937671
-0.215893
0.869453
0.847014
-1.33916
-1.33443
-0.320013
-0.942298
0.0399276
-0.0185683
-1.16709
-1.05633
0.744885
1.14719
0.390325
-0.462935
0.218469
0.472206
2.39686
0.804993
-1.23365
-1.08198
-0.270689
-0.923625
-0.439142
0.179649
0.730831
-1.07771
-1.05051
0.259047
-0.901818
1.11194
-0.815429
0.898592
-1.02995
-0.834886
1.48948
1.45122
1.08759
-1.0589
-0.459956
-0.553916
0.537807
-0.601989
-0.581989
0.580794
-0.392811
0.905219
-0.582652
1.01222
-0.537168
-0.601989
1.45507
0.946494
-0.530213
-0.594926
-0.145205
0.491215
1.85849
-1.34
-0.686566
0.401561
-0.722801
-0.358813
-0.775369
0.123846
-0.224752
-0.983123
0.988948
1.73671
0.938232
-1.30238
-0.375973
0.358009
0.0991847
-1.25597
-0.390495
2.89708
-0.243926
-0.398376
-0.506737
0.183185
0.281044
0.0108493
-0.741649
-0.147391
1.42162
-1.19045
-0.127628
-0.224135
-0.753855
-1.32081
0.913807
-0.0216418
0.238375
0.0855448
0.0791902
-0.157968
0.0889246
-0.208778
-0.855116
-0.879947
-0.0850717
-0.814036
-0.383951
-0.44109
-0.560348
-0.913525
-0.131734
0.0128087
0.125878
-0.504443
-0.27796
0.37261
-0.144577
-0.0272351
-0.556115
-0.568953
0.00718136
-0.266988
-0.291877
-0.295953
-0.291275
3.71556
0.239571
-0.29475
-0.289054
-0.294601
-0.292069
-0.286583
-0.147031
-0.295953
-0.295953
-0.292924
-0.291459
-0.295648
-0.318155
-0.192907
0.675542
-0.715852
-0.0997264
-0.278479
-0.275955
-0.361535
-0.433603
-0.293053
0.159144
-0.494337
-0.369822
-0.517644
-0.229872
-0.571867
-0.366848
-0.368016
-0.319952
-0.555248
-0.247671
-0.276724
-0.0936978
-0.30489
-0.406576
-0.259799
-0.000482709
-0.428153
-0.322846
-0.219545
-0.27033
-0.639903
-0.274365
-0.275162
-0.271388
3.73251
0.112106
-0.274738
-0.275912
-0.276127
-0.275247
-0.27466
-0.273406
-0.275287
-0.273973
-0.273404
-0.274779
-0.276166
-0.279789
-0.280715
-0.278279
3.72299
0.200073
-0.280907
-0.281386
-0.281099
-0.280612
-0.280526
-0.276592
-0.280853
-0.280034
-0.280087
-0.28048
-0.281699
-0.51055
0.360218
-0.353958
-1.22079
-0.773416
0.172147
0.568212
1.30971
-1.18668
1.00977
-0.593824
-1.22079
1.66977
0.871671
1.06819
-1.16968
0.00358399
0.0375951
1.28751
-1.01858
-0.834064
-0.272671
-0.383533
-0.254705
-0.571975
0.122957
-0.646317
-0.591097
1.85779
1.75813
-0.285101
-0.745876
-0.503878
-0.159149
1.86661
0.678848
-0.847602
-0.197555
-0.970587
-0.223952
-0.356753
-0.319038
-0.668103
-0.391257
1.48068
1.71879
0.550589
-1.65764
0.24883
0.680444
2.33919
-1.75008
-0.31974
0.280613
-0.199369
0.687126
-0.754556
-0.0710031
-0.142438
-1.19176
0.268735
0.563577
0.828758
-1.46832
-0.390247
-0.35318
-0.941802
-1.04405
1.4012
1.20096
0.368383
-0.196626
0.572157
0.220846
2.29101
0.249677
-1.0983
-1.16392
-0.174071
-0.942032
-0.243037
-0.322333
0.143917
-0.502117
-0.569579
-0.397826
-0.496652
-0.374081
-0.427908
-0.345471
-0.374081
-0.374081
0.323596
1.5188
-0.034627
-0.484455
-0.333397
-0.421456
-0.431915
-0.474807
1.43208
-0.438054
0.0658448
-0.474807
-0.189632
-0.205733
3.3212
-0.268789
-0.428767
-0.474807
-0.277635
-0.399321
-0.460202
-0.485664
-0.531454
-0.481143
2.15111
-0.195831
1.78382
-0.548768
-0.548768
-0.0369543
2.03641
-0.548768
-0.519521
-0.548768
-0.520486
-0.545014
-0.49316
-0.529768
0.648583
-0.636543
-0.608251
-0.375562
-0.376619
-0.299326
-0.459666
0.0595818
-0.305835
-0.273445
2.1523
2.66828
-0.376199
-0.794375
-0.286681
0.483428
3.13273
-1.04379
-0.831103
-0.486502
-0.26711
-0.559214
-0.207805
-0.188418
-0.583264
0.547172
0.0573861
-0.194076
1.11323
-0.685992
-0.32458
-0.33937
-0.141848
-0.166496
-0.336849
3.71746
0.179009
-0.339752
-0.288889
-0.186027
-0.277574
-0.24953
-0.328093
-0.328447
-0.245478
-0.343538
-0.246049
0.168617
0.940704
-0.971702
-0.301398
-0.321987
-0.402313
-0.501681
-0.433011
-0.0839609
0.66176
-0.42327
-0.0482532
0.43967
0.803311
-1.06535
-0.668091
-0.682718
-0.510035
-0.682718
0.943308
1.12861
1.38102
-0.321668
-0.682718
2.24134
1.20388
-0.682718
-0.682718
-0.682718
-0.682718
-0.61934
-0.557225
-0.288615
0.957369
-0.551559
-0.628283
0.58983
-0.174098
0.797838
-0.0244477
0.793808
-0.469668
0.0682463
-0.151117
0.293256
0.422295
-1.07763
-0.271504
-0.275463
-0.271362
3.73298
0.107214
-0.273479
-0.275533
-0.274232
-0.27539
-0.274677
-0.273258
-0.276267
-0.271589
-0.276267
-0.275353
-0.275816
-0.519339
-0.437329
2.22069
-0.732483
-0.250304
-0.0384099
-0.537905
-0.636557
-0.58509
-0.30874
-0.398636
-0.336555
1.8091
1.89754
-0.38281
-0.76318
-0.0123914
0.447605
-1.27692
-1.21455
0.117172
0.789631
0.105754
1.625
0.423878
1.69027
-0.0270124
-0.158213
-1.3124
-1.41097
1.00278
-0.789649
0.14039
0.382344
-0.695232
-1.21235
0.0583407
1.09686
0.244631
0.564144
-0.724945
0.144103
0.104513
-0.770542
-1.345
-1.22079
0.717287
2.51625
0.0438848
0.398532
0.280668
-0.134653
-0.0471488
0.139736
-0.486994
-1.71465
-0.73588
0.154799
0.363836
1.41768
-0.254836
1.66426
1.09974
-2.18897
0.0438848
0.398532
0.280668
-0.134653
-0.0471488
0.139736
-0.486994
-1.71465
-0.73588
0.154799
0.363836
1.41768
-0.254836
1.66426
1.09974
-2.18897
-0.0916805
-0.0293665
-0.349077
3.59112
0.288229
-0.0834132
-0.337314
0.138013
-0.28567
-0.116213
-0.0966955
-0.608421
-0.600404
-0.466862
-0.127264
-0.824981
-0.846257
-0.563209
0.0191287
-1.18168
-0.357748
1.19621
-0.322649
2.17359
-0.543905
1.58336
-0.16045
-0.427341
0.124862
1.11962
-0.547881
-1.26565
-0.445468
-0.430554
-0.278306
-0.431313
-0.423164
-0.386591
-0.425418
-0.145918
-0.424606
0.253556
-0.306496
-0.453249
-0.401817
-0.339975
-0.44989
-0.468212
-0.315866
-0.294244
-0.281367
3.66073
0.238689
-0.293691
-0.284218
-0.30573
-0.319489
-0.30761
-0.151458
-0.283685
-0.342836
-0.280691
-0.282011
-0.327024
-0.593426
0.132097
-0.66702
0.358129
-1.03151
0.0945649
0.154358
-0.130376
1.01445
2.73429
-0.763201
0.0859494
-0.415803
-0.832796
1.14915
-1.28886
-1.17453
-0.364465
0.261632
-1.10693
-0.336725
0.0606001
-1.24217
-0.132546
0.680592
0.838416
-0.0221718
2.65045
0.0996058
0.998536
-0.0641639
-1.14613
-0.655278
-0.424504
-0.681572
-0.676392
-0.589261
0.322665
0.0428362
2.19856
1.81725
0.0261592
-0.492563
1.71414
-0.683394
-0.683394
-0.600636
-0.634614
-0.11071
0.0300217
-0.626313
2.68285
1.17424
-0.223635
0.0149583
-0.446135
-0.215287
-0.303844
0.118496
-0.273951
-0.850496
-0.843087
0.285254
-0.56258
-0.366349
-0.385526
-0.377035
3.49431
0.979484
-0.379421
-0.338695
-0.385526
-0.354846
-0.363807
0.280183
-0.26523
-0.385526
-0.385526
-0.381997
-0.38449
-0.32727
-0.331506
-0.329791
3.62166
0.697616
-0.330373
-0.319618
-0.33042
-0.32889
-0.324212
-0.0647692
-0.331506
-0.329019
-0.312949
-0.328307
-0.330645
-0.271504
-0.275463
-0.271362
3.73298
0.107214
-0.273479
-0.275533
-0.274232
-0.27539
-0.274677
-0.273258
-0.276267
-0.271589
-0.276267
-0.275353
-0.275816
0.569803
0.737872
1.34463
-1.92457
-0.755283
-0.404122
-0.19347
-0.628409
-0.251472
-0.51435
-0.168343
0.32102
1.09552
0.9653
1.45902
-1.65315
-0.286652
0.0449456
-0.793893
-0.761767
3.09897
-0.605664
0.220694
0.0977644
-0.397777
1.15856
0.214908
-0.2347
-0.770756
-0.717881
0.548462
-0.815213
-0.490489
-0.405925
0.744987
-0.424718
0.0529935
-0.227047
1.53758
-0.247907
-0.475641
-0.0699724
-0.223992
-0.407606
0.745736
0.931096
-0.478502
-0.560596
0.20264
0.211694
-0.0936872
-1.18759
-0.0992751
0.128406
-0.433178
-0.0410422
-0.0259306
0.18708
0.558832
-0.415426
-0.327459
0.479474
0.389267
-0.904213
-0.37883
-0.575413
-0.529563
-0.656964
-0.617489
1.52445
-0.248478
1.97427
-0.623988
1.96638
-0.539275
-0.656964
1.08309
-0.555331
-0.515661
-0.650237
-0.264977
-0.43486
0.22491
-0.550209
-0.506205
-0.493844
-0.23974
0.410971
-0.503492
-0.0486551
-0.531809
-0.689409
2.60561
2.25327
-0.510582
-0.720973
0.130632
1.10198
1.01482
-2.04757
-0.0997264
0.156024
0.127752
0.455848
0.082381
0.184119
0.159144
0.759296
-1.373
-0.894091
1.69144
-1.44905
-0.506862
-0.509422
-0.481332
-0.531581
0.914917
-0.525073
0.905155
-0.497567
-0.476086
1.38886
2.88329
-0.531581
-0.446132
-0.531581
-0.531581
-0.523417
1.33493
1.80744
0.354179
-1.20185
-1.22291
-0.353522
-0.662081
-0.95566
1.06601
-0.686937
-0.960781
0.934346
-0.0173758
0.34345
1.07529
-0.854539
-0.00751899
0.88027
-1.2714
-0.844753
1.19575
1.32607
0.618201
0.899867
-0.549543
0.613766
1.24441
-1.22749
-1.40886
-1.27603
0.176653
-0.369384
0.176429
1.29759
0.643857
0.181206
1.02805
-0.33523
0.197877
-1.41559
-0.327774
-0.563205
1.79743
-0.330715
-1.47202
-0.711456
1.1765
-1.34295
0.00166396
0.344518
-0.141848
-1.12972
-0.140078
0.187435
0.179009
0.272284
-0.288889
-0.098594
0.269982
-0.447976
-0.591904
-0.580648
0.841355
-0.489797
-0.231146
0.579328
-0.550765
-1.34075
0.225918
0.549549
-0.0585522
-0.267718
0.330289
0.404995
-0.0380301
0.712377
-1.25103
-1.02303
1.13168
-1.16201
-0.00966205
1.18943
0.400937
-1.42347
-0.700247
-0.30121
-0.477693
1.73522
-0.904109
-0.135817
-0.936392
0.339622
0.972371
-0.416872
1.81846
-1.15056
-0.545635
-0.477715
-0.701697
1.71926
1.95452
0.26115
-0.0666978
0.31318
-0.574634
0.263328
0.819585
-0.550194
-0.73782
-0.540467
-0.501899
-0.634271
0.288711
1.24146
-0.797548
-1.68352
-0.72197
0.256862
-0.174866
0.391323
0.0856249
0.00895381
-0.975944
2.18697
-1.39036
-0.289616
0.526302
1.04762
0.551941
1.18424
0.5047
-1.13009
-0.912208
-0.818127
-0.890972
-0.696979
0.146481
-0.547772
-0.796407
0.576628
0.218964
1.0344
2.42058
-0.845375
-0.160215
0.00301841
-0.722203
-0.643085
0.652711
0.0306301
0.559431
-0.376666
0.796521
-0.076942
0.672882
1.36625
-0.812702
-1.22695
0.669728
-0.988702
0.223512
0.555162
-0.332915
-0.560765
-0.539415
-0.384583
-0.396694
-0.376119
-0.358397
-0.342202
-0.432071
-0.371854
-0.377608
-0.366368
0.504675
-0.578599
1.15518
1.60373
-1.12961
-1.22818
0.398362
-0.0250182
0.266515
-0.402727
-0.332279
0.148144
0.593897
0.210349
-1.0956
-1.22818
1.96641
-0.900997
0.595457
1.19186
-0.93825
-1.10353
-0.223108
0.167355
-0.139949
-0.639393
0.889542
0.0422721
0.42888
2.08127
-1.3322
-1.39689
1.05866
-0.681976
-0.647628
-0.519409
0.175132
-1.1267
1.23543
2.43672
-0.387935
-0.179745
-0.146444
0.14428
1.60495
0.00414921
-1.0809
-0.92924
0.230312
-0.812975
0.518795
0.309976
0.331606
-1.32852
-0.394208
1.06409
-0.376799
1.33113
-0.264671
0.800911
0.0716169
-0.69696
-0.327323
-0.00211094
0.0203688
-1.0579
0.45263
0.114096
-0.998869
-1.22848
0.0923091
0.36023
0.616127
-0.447365
-0.333249
0.0654196
1.24084
-0.388452
-1.11046
-1.02261
0.392242
-0.0729036
0.159206
1.03784
-0.699946
-1.07626
0.0899721
-0.19377
0.458852
-0.62841
-0.0305781
-0.223515
0.443463
0.609529
-1.07626
-1.03836
1.57442
-1.33311
-0.728686
-0.446406
1.63618
-0.747671
-0.818409
0.65062
-0.803921
-0.295344
-0.392568
0.0913847
-0.792341
-0.0188291
1.62313
2.22146
-0.313252
-0.86535
-0.146092
-0.622774
1.81958
-0.0984455
-0.697054
-0.483618
-0.723217
-0.865167
0.312926
-0.514952
-0.464164
-0.232433
1.72463
1.79517
-0.0932631
-0.711125
-0.265001
-0.00181346
0.214469
-0.78846
0.788561
0.870936
0.196075
-0.293978
-0.37066
0.847001
1.81175
0.00563458
-1.08346
-1.16535
0.264556
-1.03025
-0.589966
-0.0983524
2.50691
-1.46439
-0.813903
0.381548
-0.511556
0.782745
-0.0261774
0.346863
-0.790698
1.0759
-0.0318719
-0.543503
0.961936
-1.18548
-0.411526
0.0900129
1.83656
2.02875
-0.773673
-0.797404
-0.625079
-0.929179
-0.437529
-0.186875
-0.552696
-0.192972
1.03141
1.13712
0.159305
-1.37622
0.136246
0.144381
0.040209
-1.51752
0.202525
0.824615
0.320307
-0.646879
0.326199
0.543223
2.25719
0.677941
-1.66249
-1.30601
0.512209
-0.852143
-0.468823
-0.463629
-0.381064
-0.443427
-0.471777
-0.210643
-0.424522
2.92608
-0.25718
2.09337
-0.470098
-0.302671
-0.177009
-0.454222
-0.463457
-0.0309232
-0.274107
-0.253535
-0.240763
3.74661
-0.127647
-0.279249
-0.259936
-0.27263
-0.251535
-0.284099
-0.259044
-0.253338
-0.281247
-0.188696
-0.216979
-0.303808
-0.323646
-0.232394
0.825826
0.231676
0.963988
0.722013
-0.23421
-0.330195
-0.489484
0.183893
0.241144
-0.841967
-0.231738
-0.307308
-0.139329
-0.0382695
-0.18028
0.0290036
-0.791165
-0.939874
0.438142
0.964946
0.441799
-0.00855127
-0.125998
-0.0610088
-0.202558
0.141544
-0.747406
-1.08308
-0.0576299
-0.602435
-0.460796
-0.562588
1.05593
-0.300951
-0.630369
-0.470061
-0.59226
-0.309007
-0.422627
-0.114522
-0.568726
-0.283479
2.52887
2.15245
-0.344853
-0.67701
-0.526922
-0.424912
1.58242
-1.04239
-0.989891
0.788798
-0.803275
1.68727
-0.625689
1.21254
-0.960204
-0.501583
0.531354
1.29918
-0.390806
-0.835892
-0.473637
-0.267297
-0.4957
-0.656118
1.51952
1.52816
-0.0304449
-0.694035
-0.207146
-0.257029
1.56363
-0.446993
-0.949935
-0.707325
0.264816
-0.573627
-0.942284
-0.872174
1.56886
0.376491
-0.754886
-0.484978
-0.507122
0.583531
-0.600665
0.837128
-0.555999
-0.592116
1.85676
1.6864
-0.634513
-0.964443
-0.246638
0.0954591
-0.890423
-0.121765
-0.132321
-0.0976355
0.504865
2.06479
-0.250041
2.1451
0.254904
-1.25566
-1.25566
-1.25566
0.322697
0.117994
1.6238
1.05615
-0.874546
-1.23085
-0.125416
-0.42971
0.525234
0.0149274
0.234568
-0.202197
-0.250612
0.748019
-1.13994
-1.35407
2.05395
-0.649308
-0.375292
-0.285178
-0.455604
3.67502
0.0599452
0.133488
-0.287068
-0.0720905
-0.211676
-0.0310487
-0.136306
-0.481434
-0.520599
-0.294906
-0.210122
-0.50713
-0.427862
0.195961
-0.618089
-1.08357
0.432656
1.64315
0.453389
1.40501
-0.437227
2.15242
-0.220571
-1.14542
-1.06014
-0.603793
0.0086105
-0.694535
-0.427862
0.195961
-0.618089
-1.08357
0.432656
1.64315
0.453389
1.40501
-0.437227
2.15242
-0.220571
-1.14542
-1.06014
-0.603793
0.0086105
-0.694535
-0.427862
0.195961
-0.618089
-1.08357
0.432656
1.64315
0.453389
1.40501
-0.437227
2.15242
-0.220571
-1.14542
-1.06014
-0.603793
0.0086105
-0.694535
0.0275743
0.930079
1.28873
-1.73144
-0.259646
-0.082144
-0.215639
2.11628
-1.00501
-0.388544
-1.33114
-0.392752
-0.633973
0.192317
1.09411
0.391196
0.0275743
0.930079
1.28873
-1.73144
-0.259646
-0.082144
-0.215639
2.11628
-1.00501
-0.388544
-1.33114
-0.392752
-0.633973
0.192317
1.09411
0.391196
0.0275743
0.930079
1.28873
-1.73144
-0.259646
-0.082144
-0.215639
2.11628
-1.00501
-0.388544
-1.33114
-0.392752
-0.633973
0.192317
1.09411
0.391196
0.0275743
0.930079
1.28873
-1.73144
-0.259646
-0.082144
-0.215639
2.11628
-1.00501
-0.388544
-1.33114
-0.392752
-0.633973
0.192317
1.09411
0.391196
-0.879967
-0.967854
0.336741
-1.0368
-0.414985
-0.292824
0.286626
2.48052
-0.792913
1.5567
0.0219656
-1.05314
0.570325
0.716346
0.217639
-0.748374
0.330004
0.200409
-1.02568
-1.27812
1.86461
0.883681
0.501305
0.875605
-0.501319
0.107001
1.38567
-0.730581
-1.26455
-1.30158
0.639652
-0.686101
-0.234018
-0.133805
-0.760878
-0.947319
2.88894
0.188028
0.680798
-0.595723
-0.0226821
-0.281952
1.43954
0.304234
-0.866195
-0.947319
-0.126144
-0.585505
0.110078
-0.452546
-0.76139
0.258381
2.7522
-0.559692
1.23564
-0.529248
0.710289
-0.513516
0.928455
-1.03543
-0.78423
-1.03543
-0.161608
-0.161945
-0.53202
-0.534922
0.65958
-0.765771
-0.75992
-0.165929
-0.61485
0.348262
0.261393
0.438149
-0.753698
0.24223
1.43344
1.03692
-0.532337
-0.52201
0.509023
-0.02052
-0.483547
-0.866145
-0.33476
-0.484144
0.868722
-0.524188
-0.451399
-0.13908
0.386265
-0.453556
-0.5139
-0.5139
-0.264667
-0.705417
-0.45176
-0.135314
1.35459
0.00226492
0.241306
0.576823
-1.14447
1.87271
-1.0754
0.95511
-0.574995
-0.695004
0.268893
1.06911
-0.398899
-1.86496
-0.265914
-0.324114
-0.579839
-0.592564
1.08665
-0.506528
3.26911
-0.00912632
-0.505988
0.0736353
0.731298
-0.592564
-0.236275
-0.592564
-0.507817
-0.447399
1.44302
1.5579
-0.65025
-1.72761
-0.113424
-0.257074
-0.578601
-0.905482
-0.33598
-0.182276
1.29947
0.666786
-1.16272
-0.36382
1.43855
-0.128497
-0.286041
-0.045306
-0.699945
-0.36917
0.161549
-0.496836
2.99769
-0.669117
-0.124032
0.86579
1.33913
0.11717
-0.760413
-0.815956
-0.485567
-0.728943
0.214613
1.23746
-0.323956
-0.708592
-0.365996
-0.37678
-0.330874
-0.390615
0.0773096
-0.318287
-0.341019
-0.135035
-0.35519
-0.347735
0.57035
-0.826483
-0.385734
-0.3855
-0.0991901
-0.386438
-0.377636
-0.383925
-0.386116
-0.381895
-0.375995
-0.366509
-0.385703
-0.386438
2.86792
2.20496
-0.386438
-0.38537
-0.467035
-0.346661
1.70789
0.61143
-0.627766
-0.1649
-0.524066
-0.823243
-0.629813
-0.129819
-0.394737
-1.09992
1.91133
1.70789
0.465742
-1.19632
-0.49045
-0.461759
-0.483147
-0.50301
0.897101
-0.110891
2.10154
-0.50301
-0.50301
-0.222983
2.66905
-0.50301
-0.50301
-0.50301
-0.442841
-0.437562
0.299223
1.05617
-0.96885
-1.64564
0.741124
0.388573
0.997818
-0.297665
0.790003
0.00428286
1.44861
0.0531
-1.40149
-1.26517
0.913227
-1.11331
-0.296267
-0.297019
-0.801831
-0.989268
-0.595835
1.56174
-0.331152
1.81623
0.965957
1.39917
-0.856805
1.13987
-0.78113
-0.989268
-0.32888
-0.615518
-0.295914
0.804225
-1.03776
-1.34452
1.17586
0.319421
1.20548
-0.508026
0.0808977
0.01042
2.0041
-0.303235
-1.30309
-0.776977
0.924722
-0.955598
-0.33472
0.320443
1.29003
-0.670217
-0.360156
-0.336405
-0.711073
0.178011
-0.948857
0.373289
0.0298506
-0.931709
0.0139674
0.34349
2.91458
-1.17052
-0.337416
-0.27425
2.35811
-1.0459
-0.172801
1.23977
-0.0636363
0.00271195
-0.580176
0.0986244
-0.0960154
-0.406411
-0.144519
0.674707
-0.369537
-0.883266
-0.571628
0.436183
-0.842597
-0.83942
0.575102
0.582795
0.487527
1.40361
-0.119721
0.509154
1.05702
0.797981
-1.44596
-1.65602
1.08958
-1.4636
0.279035
-0.0737981
-0.962226
-1.36864
-0.2204
0.215254
0.108227
2.74677
0.763834
0.346328
-1.12431
0.36666
-0.917667
-0.765681
-0.309879
0.916501
-0.602414
-0.60303
1.15095
-0.576221
-0.610737
-0.241677
-0.602556
0.318122
-0.610737
0.448582
-0.604968
-0.610737
2.4354
1.9315
-0.610737
-0.610737
-0.0534943
-0.263185
-1.26833
0.993245
2.67411
-0.295668
0.234212
-0.0766214
0.309857
-0.0601927
0.314094
0.989259
-1.28208
-1.32229
-0.264884
-0.628035
-0.743448
-0.597114
-0.482935
2.31647
1.17758
0.0336538
0.935927
-0.015934
0.672923
-0.182052
0.390029
0.686962
-0.936389
-1.26952
-0.420129
-1.56602
0.55496
0.717041
-1.11169
-1.19508
0.706053
0.568728
0.757842
-0.730561
-0.137615
0.168846
2.09379
0.942129
-1.2917
-1.30666
0.187844
-0.923919
-0.553432
-0.250614
1.14807
-1.40565
1.10814
0.324772
0.549829
-1.24021
-0.00101177
-0.52265
0.753014
0.526913
-0.792867
2.16885
-0.720908
-1.09225
-0.129538
-0.266887
-0.94767
-1.06049
2.07516
1.33538
1.19892
-0.318131
0.185633
-0.172075
1.23981
-0.538583
-1.19604
-1.19604
0.388687
-0.598127
-0.420523
-0.194018
1.95247
-1.36802
-0.24338
-0.282564
-0.443877
-0.92683
-0.392524
-0.358139
0.17185
-0.150298
1.22842
2.30649
-0.0170126
-0.86205
-0.112968
-0.0861067
-0.333537
-1.29134
-1.00819
0.948316
-0.156701
1.21767
-0.083914
1.49523
-0.605901
1.84815
-1.1332
-1.25214
0.888321
-0.333696
-0.165094
0.701664
1.88654
0.0173089
-0.959153
-0.723451
-0.374478
-0.863941
-0.265189
-0.462817
-0.548494
0.535279
0.282996
0.53451
1.50081
[truncated: 32,250 more rows]

## Sheet: Figure 1C
Gene symbol	Human cell type	Preferential expression	Percentage of cells expressing
ZMYND10	cd8.positive..alpha.beta.t.cell	-0.139331	1.16086
TTC12	cd8.positive..alpha.beta.t.cell	-0.11928	1.82421
SPAG1	cd8.positive..alpha.beta.t.cell	-0.210479	3.15091
RSPH9	cd8.positive..alpha.beta.t.cell	-0.180165	0.165837
RSPH4A	cd8.positive..alpha.beta.t.cell	-0.14698	0.497512
RSPH3	cd8.positive..alpha.beta.t.cell	-0.390028	2.81924
RSPH1	cd8.positive..alpha.beta.t.cell	-0.172454	0.165837
NME8	cd8.positive..alpha.beta.t.cell	0.68158	1.82421
NEK10	cd8.positive..alpha.beta.t.cell	-0.0944325	0.829187
MCIDAS	cd8.positive..alpha.beta.t.cell	-0.166149	0.165837
LRRC56	cd8.positive..alpha.beta.t.cell	-0.259488	0.165837
HYDIN	cd8.positive..alpha.beta.t.cell	-0.163149	0.165837
GAS8	cd8.positive..alpha.beta.t.cell	-0.34162	1.16086
GAS2L2	cd8.positive..alpha.beta.t.cell	-0.105704	0.165837
FOXJ1	cd8.positive..alpha.beta.t.cell	-0.160497	0.331675
DRC1	cd8.positive..alpha.beta.t.cell	-0.166644	0
DNAJB13	cd8.positive..alpha.beta.t.cell	-0.189969	0
DNAI2	cd8.positive..alpha.beta.t.cell	-0.174492	0
DNAI1	cd8.positive..alpha.beta.t.cell	-0.193421	0
DNAH5	cd8.positive..alpha.beta.t.cell	-0.176603	0.66335
DNAH11	cd8.positive..alpha.beta.t.cell	-0.220455	0.165837
DNAAF5	cd8.positive..alpha.beta.t.cell	-0.516135	2.15589
DNAAF4	cd8.positive..alpha.beta.t.cell	-0.326838	0.331675
DNAAF3	cd8.positive..alpha.beta.t.cell	-0.170667	0
DNAAF2	cd8.positive..alpha.beta.t.cell	0.757003	6.79934
DNAAF1	cd8.positive..alpha.beta.t.cell	-0.188571	0.331675
CFAP298	cd8.positive..alpha.beta.t.cell	-0.0732453	15.7546
CCNO	cd8.positive..alpha.beta.t.cell	-0.31658	0.66335
CCDC65	cd8.positive..alpha.beta.t.cell	0.0471389	2.6534
CCDC40	cd8.positive..alpha.beta.t.cell	-0.16504	0.331675
CCDC39	cd8.positive..alpha.beta.t.cell	-0.000963167	0.497512
ZMYND10	cd4.positive..alpha.beta.t.cell	-0.168894	0.304878
TTC12	cd4.positive..alpha.beta.t.cell	0.528042	3.5061
SPAG1	cd4.positive..alpha.beta.t.cell	-0.187273	3.20122
RSPH9	cd4.positive..alpha.beta.t.cell	-0.186461	0
RSPH4A	cd4.positive..alpha.beta.t.cell	-0.139665	0.609756
RSPH3	cd4.positive..alpha.beta.t.cell	-0.487353	1.52439
RSPH1	cd4.positive..alpha.beta.t.cell	-0.168988	0.609756
NME8	cd4.positive..alpha.beta.t.cell	-0.289115	0.152439
NEK10	cd4.positive..alpha.beta.t.cell	0.269402	4.72561
MCIDAS	cd4.positive..alpha.beta.t.cell	-0.244702	0
LRRC56	cd4.positive..alpha.beta.t.cell	-0.0558154	0.609756
HYDIN	cd4.positive..alpha.beta.t.cell	-0.16669	0.152439
GAS8	cd4.positive..alpha.beta.t.cell	-0.465047	0.609756
GAS2L2	cd4.positive..alpha.beta.t.cell	-0.167774	0
FOXJ1	cd4.positive..alpha.beta.t.cell	-0.164631	0.304878
DRC1	cd4.positive..alpha.beta.t.cell	-0.166644	0
DNAJB13	cd4.positive..alpha.beta.t.cell	-0.189969	0
DNAI2	cd4.positive..alpha.beta.t.cell	-0.129342	0.304878
DNAI1	cd4.positive..alpha.beta.t.cell	-0.193421	0
DNAH5	cd4.positive..alpha.beta.t.cell	-0.189383	0.304878
DNAH11	cd4.positive..alpha.beta.t.cell	-0.210371	0.304878
DNAAF5	cd4.positive..alpha.beta.t.cell	-0.622147	2.13415
DNAAF4	cd4.positive..alpha.beta.t.cell	-0.309648	0.152439
DNAAF3	cd4.positive..alpha.beta.t.cell	-0.170667	0
DNAAF2	cd4.positive..alpha.beta.t.cell	0.720973	7.31707
DNAAF1	cd4.positive..alpha.beta.t.cell	-0.17691	0.609756
CFAP298	cd4.positive..alpha.beta.t.cell	-0.257915	11.7378
CCNO	cd4.positive..alpha.beta.t.cell	-0.33459	0.304878
CCDC65	cd4.positive..alpha.beta.t.cell	0.055404	2.43902
CCDC40	cd4.positive..alpha.beta.t.cell	-0.18143	0.457317
CCDC39	cd4.positive..alpha.beta.t.cell	-0.187151	0
ZMYND10	adventitial.cell	-0.165213	1.35135
TTC12	adventitial.cell	-0.500513	2.7027
SPAG1	adventitial.cell	-0.207165	6.75676
RSPH9	adventitial.cell	-0.159905	2.7027
RSPH4A	adventitial.cell	-0.175037	0
RSPH3	adventitial.cell	-0.195688	9.45946
RSPH1	adventitial.cell	-0.161606	1.35135
NME8	adventitial.cell	-0.311979	0
NEK10	adventitial.cell	-0.19697	0
MCIDAS	adventitial.cell	-0.244702	0
LRRC56	adventitial.cell	-0.371406	0
HYDIN	adventitial.cell	-0.166739	1.35135
GAS8	adventitial.cell	0.217135	8.10811
GAS2L2	adventitial.cell	-0.167774	0
FOXJ1	adventitial.cell	-0.172726	1.35135
DRC1	adventitial.cell	-0.166644	0
DNAJB13	adventitial.cell	-0.189969	0
DNAI2	adventitial.cell	-0.174492	0
DNAI1	adventitial.cell	-0.193421	0
DNAH5	adventitial.cell	-0.197632	0
DNAH11	adventitial.cell	-0.227392	0
DNAAF5	adventitial.cell	0.647136	12.1622
DNAAF4	adventitial.cell	-0.1734	2.7027
DNAAF3	adventitial.cell	-0.16351	1.35135
DNAAF2	adventitial.cell	-0.948915	5.40541
DNAAF1	adventitial.cell	-0.195034	0
CFAP298	adventitial.cell	-0.35357	21.6216
CCNO	adventitial.cell	-0.246943	2.7027
CCDC65	adventitial.cell	-0.19332	1.35135
CCDC40	adventitial.cell	-0.217752	1.35135
CCDC39	adventitial.cell	-0.187151	0
ZMYND10	alveolar.fibroblast	-0.1765	0
TTC12	alveolar.fibroblast	-0.21283	1.70213
SPAG1	alveolar.fibroblast	-0.287358	2.55319
RSPH9	alveolar.fibroblast	-0.14888	0.851064
RSPH4A	alveolar.fibroblast	-0.143851	0.425532
RSPH3	alveolar.fibroblast	-0.110099	6.38298
RSPH1	alveolar.fibroblast	-0.17524	0
NME8	alveolar.fibroblast	-0.311979	0
NEK10	alveolar.fibroblast	-0.19697	0
MCIDAS	alveolar.fibroblast	-0.244702	0
LRRC56	alveolar.fibroblast	-0.0809386	0.425532
HYDIN	alveolar.fibroblast	-0.178148	0
GAS8	alveolar.fibroblast	-0.445183	1.2766
GAS2L2	alveolar.fibroblast	-0.167774	0
FOXJ1	alveolar.fibroblast	-0.184667	0
DRC1	alveolar.fibroblast	-0.166644	0
DNAJB13	alveolar.fibroblast	-0.189969	0
DNAI2	alveolar.fibroblast	-0.174492	0
DNAI1	alveolar.fibroblast	-0.193421	0
DNAH5	alveolar.fibroblast	-0.197632	0
DNAH11	alveolar.fibroblast	-0.207039	0.851064
DNAAF5	alveolar.fibroblast	-0.0989263	4.25532
DNAAF4	alveolar.fibroblast	-0.212523	0.851064
DNAAF3	alveolar.fibroblast	-0.170667	0
DNAAF2	alveolar.fibroblast	0.817565	8.51064
DNAAF1	alveolar.fibroblast	-0.176649	0.851064
CFAP298	alveolar.fibroblast	-0.1265	18.2979
CCNO	alveolar.fibroblast	-0.313698	0.851064
CCDC65	alveolar.fibroblast	-0.214113	0
CCDC40	alveolar.fibroblast	0.00463673	2.55319
CCDC39	alveolar.fibroblast	0.137463	0.851064
ZMYND10	b.cell	-0.167223	1.21951
TTC12	b.cell	-0.556851	1.21951
SPAG1	b.cell	0.0617972	6.09756
RSPH9	b.cell	-0.186461	0
RSPH4A	b.cell	-0.175037	0
RSPH3	b.cell	-0.542243	2.43902
RSPH1	b.cell	-0.17524	0
NME8	b.cell	-0.311979	0
NEK10	b.cell	-0.19697	0
MCIDAS	b.cell	-0.244702	0
LRRC56	b.cell	-0.371406	0
HYDIN	b.cell	-0.178148	0
GAS8	b.cell	-0.560472	0
GAS2L2	b.cell	-0.167774	0
FOXJ1	b.cell	-0.0578384	2.43902
DRC1	b.cell	-0.166644	0
DNAJB13	b.cell	-0.189969	0
DNAI2	b.cell	-0.174492	0
DNAI1	b.cell	-0.193421	0
DNAH5	b.cell	-0.197632	0
DNAH11	b.cell	-0.132401	2.43902
DNAAF5	b.cell	-0.0214545	3.65854
DNAAF4	b.cell	-0.350511	0
DNAAF3	b.cell	-0.170667	0
DNAAF2	b.cell	0.897202	6.09756
DNAAF1	b.cell	-0.195034	0
CFAP298	b.cell	-0.365206	9.7561
CCNO	b.cell	-0.207334	2.43902
CCDC65	b.cell	-0.214113	0
CCDC40	b.cell	-0.226351	0
CCDC39	b.cell	-0.187151	0
ZMYND10	basal.cell	-0.168309	1.07056
TTC12	basal.cell	0.836348	11.4842
SPAG1	basal.cell	-0.191285	7.68856
RSPH9	basal.cell	-0.176446	0.53528
RSPH4A	basal.cell	-0.167352	0.437956
RSPH3	basal.cell	0.117769	15.5231
RSPH1	basal.cell	-0.16626	1.55718
NME8	basal.cell	-0.298484	0.0486618
NEK10	basal.cell	-0.165834	1.0219
MCIDAS	basal.cell	0.0986105	1.60584
LRRC56	basal.cell	-0.133973	1.21654
HYDIN	basal.cell	-0.120194	1.84915
GAS8	basal.cell	-0.0606814	6.71533
GAS2L2	basal.cell	-0.153903	0.0973236
FOXJ1	basal.cell	-0.0928383	3.01703
DRC1	basal.cell	-0.160852	0.145985
DNAJB13	basal.cell	-0.136049	0.827251
DNAI2	basal.cell	-0.160443	0.145985
DNAI1	basal.cell	-0.188943	0.0486618
DNAH5	basal.cell	-0.186342	0.924574
DNAH11	basal.cell	-0.141373	3.60097
DNAAF5	basal.cell	-0.178176	8.51581
DNAAF4	basal.cell	-0.186044	1.70316
DNAAF3	basal.cell	-0.140317	0.53528
DNAAF2	basal.cell	0.299499	14.4039
DNAAF1	basal.cell	-0.181394	1.16788
CFAP298	basal.cell	0.0142688	35.3771
CCNO	basal.cell	0.558076	21.1679
CCDC65	basal.cell	-0.196235	0.486618
CCDC40	basal.cell	-0.189415	0.827251
CCDC39	basal.cell	-0.129865	0.389294
ZMYND10	basophil	-0.167411	0.443131
TTC12	basophil	-0.42162	1.18168
SPAG1	basophil	-0.417368	1.03397
RSPH9	basophil	-0.135928	1.4771
RSPH4A	basophil	-0.175037	0
RSPH3	basophil	-0.33895	7.53324
RSPH1	basophil	-0.171079	0.295421
NME8	basophil	0.539987	2.21566
NEK10	basophil	-0.186139	0.14771
MCIDAS	basophil	-0.244702	0
LRRC56	basophil	-0.145419	0.443132
HYDIN	basophil	-0.143378	0.590842
GAS8	basophil	-0.307488	2.21566
GAS2L2	basophil	-0.167774	0
FOXJ1	basophil	-0.184667	0
DRC1	basophil	-0.166644	0
DNAJB13	basophil	-0.189969	0
DNAI2	basophil	-0.128778	0.443132
DNAI1	basophil	-0.193421	0
DNAH5	basophil	-0.1948	0.14771
DNAH11	basophil	-0.20454	0.443132
DNAAF5	basophil	-0.685148	3.10192
DNAAF4	basophil	-0.298777	0.590842
DNAAF3	basophil	-0.170667	0
DNAAF2	basophil	0.504829	8.4195
DNAAF1	basophil	-0.192041	0.443132
CFAP298	basophil	-0.00989194	21.418
CCNO	basophil	-0.347929	0.295421
CCDC65	basophil	-0.214113	0
CCDC40	basophil	-0.22134	0.295421
CCDC39	basophil	-0.145909	0.14771
ZMYND10	bronchial.smooth.muscle.cell	-0.1765	0
TTC12	bronchial.smooth.muscle.cell	-0.136651	2.98508
SPAG1	bronchial.smooth.muscle.cell	-0.300201	2.98508
RSPH9	bronchial.smooth.muscle.cell	-0.153307	1.49254
RSPH4A	bronchial.smooth.muscle.cell	-0.175037	0
RSPH3	bronchial.smooth.muscle.cell	-0.129299	5.97015
RSPH1	bronchial.smooth.muscle.cell	-0.170394	1.49254
NME8	bronchial.smooth.muscle.cell	-0.311979	0
NEK10	bronchial.smooth.muscle.cell	-0.19697	0
MCIDAS	bronchial.smooth.muscle.cell	-0.244702	0
LRRC56	bronchial.smooth.muscle.cell	0.0136714	1.49254
HYDIN	bronchial.smooth.muscle.cell	-0.178148	0
GAS8	bronchial.smooth.muscle.cell	-0.560472	0
GAS2L2	bronchial.smooth.muscle.cell	-0.167774	0
FOXJ1	bronchial.smooth.muscle.cell	-0.184667	0
DRC1	bronchial.smooth.muscle.cell	-0.151382	1.49254
DNAJB13	bronchial.smooth.muscle.cell	-0.189969	0
DNAI2	bronchial.smooth.muscle.cell	-0.174492	0
DNAI1	bronchial.smooth.muscle.cell	-0.193421	0
DNAH5	bronchial.smooth.muscle.cell	-0.191895	1.49254
DNAH11	bronchial.smooth.muscle.cell	-0.227392	0
DNAAF5	bronchial.smooth.muscle.cell	1.11001	8.95522
DNAAF4	bronchial.smooth.muscle.cell	0.0366557	1.49254
DNAAF3	bronchial.smooth.muscle.cell	-0.170667	0
DNAAF2	bronchial.smooth.muscle.cell	-0.0911422	7.46269
DNAAF1	bronchial.smooth.muscle.cell	-0.195034	0
CFAP298	bronchial.smooth.muscle.cell	-0.0802923	19.403
CCNO	bronchial.smooth.muscle.cell	-0.320769	1.49254
CCDC65	bronchial.smooth.muscle.cell	-0.214113	0
CCDC40	bronchial.smooth.muscle.cell	-0.226351	0
CCDC39	bronchial.smooth.muscle.cell	-0.187151	0
ZMYND10	bronchial.vessel.endothelial.cell	-0.1765	0
TTC12	bronchial.vessel.endothelial.cell	-0.658248	0
SPAG1	bronchial.vessel.endothelial.cell	0.12611	21.2766
RSPH9	bronchial.vessel.endothelial.cell	-0.186461	0
RSPH4A	bronchial.vessel.endothelial.cell	-0.175037	0
RSPH3	bronchial.vessel.endothelial.cell	-0.0858942	12.766
RSPH1	bronchial.vessel.endothelial.cell	-0.151729	4.25532
NME8	bronchial.vessel.endothelial.cell	-0.311979	0
NEK10	bronchial.vessel.endothelial.cell	-0.19697	0
MCIDAS	bronchial.vessel.endothelial.cell	-0.244702	0
LRRC56	bronchial.vessel.endothelial.cell	-0.371406	0
HYDIN	bronchial.vessel.endothelial.cell	-0.111292	2.12766
GAS8	bronchial.vessel.endothelial.cell	-0.189874	10.6383
GAS2L2	bronchial.vessel.endothelial.cell	-0.167774	0
FOXJ1	bronchial.vessel.endothelial.cell	-0.184667	0
DRC1	bronchial.vessel.endothelial.cell	-0.166644	0
DNAJB13	bronchial.vessel.endothelial.cell	-0.189969	0
DNAI2	bronchial.vessel.endothelial.cell	-0.111438	2.12766
DNAI1	bronchial.vessel.endothelial.cell	-0.193421	0
DNAH5	bronchial.vessel.endothelial.cell	-0.140831	4.25532
DNAH11	bronchial.vessel.endothelial.cell	-0.227392	0
DNAAF5	bronchial.vessel.endothelial.cell	1.55818	25.5319
DNAAF4	bronchial.vessel.endothelial.cell	-0.350511	0
DNAAF3	bronchial.vessel.endothelial.cell	-0.170667	0
DNAAF2	bronchial.vessel.endothelial.cell	0.254414	19.1489
DNAAF1	bronchial.vessel.endothelial.cell	-0.188412	2.12766
CFAP298	bronchial.vessel.endothelial.cell	0.263919	57.4468
CCNO	bronchial.vessel.endothelial.cell	-0.355583	0
CCDC65	bronchial.vessel.endothelial.cell	-0.214113	0
CCDC40	bronchial.vessel.endothelial.cell	-0.212548	2.12766
CCDC39	bronchial.vessel.endothelial.cell	-0.187151	0
ZMYND10	capillary.aerocyte	-0.158446	0.753296
TTC12	capillary.aerocyte	0.0424495	2.07156
SPAG1	capillary.aerocyte	-0.285876	2.07156
RSPH9	capillary.aerocyte	-0.159614	0.564972
RSPH4A	capillary.aerocyte	-0.154621	0.564972
RSPH3	capillary.aerocyte	-0.480329	1.69491
RSPH1	capillary.aerocyte	-0.160008	0.94162
NME8	capillary.aerocyte	-0.311979	0
NEK10	capillary.aerocyte	-0.154278	0.564972
MCIDAS	capillary.aerocyte	-0.244702	0
LRRC56	capillary.aerocyte	-0.0675912	0.564972
HYDIN	capillary.aerocyte	-0.178148	0
GAS8	capillary.aerocyte	0.0630433	3.20151
GAS2L2	capillary.aerocyte	-0.167774	0
FOXJ1	capillary.aerocyte	-0.175849	0.188324
DRC1	capillary.aerocyte	-0.166644	0
DNAJB13	capillary.aerocyte	-0.113888	0.376648
DNAI2	capillary.aerocyte	-0.174492	0
DNAI1	capillary.aerocyte	-0.10905	0.376648
DNAH5	capillary.aerocyte	-0.16119	0.753296
DNAH11	capillary.aerocyte	-0.0815563	2.07156
DNAAF5	capillary.aerocyte	-0.343888	2.63653
DNAAF4	capillary.aerocyte	-0.172007	0.753296
DNAAF3	capillary.aerocyte	-0.11131	0.564972
DNAAF2	capillary.aerocyte	-0.295132	3.57815
DNAAF1	capillary.aerocyte	-0.130226	0.753296
CFAP298	capillary.aerocyte	-0.0804468	14.5009
CCNO	capillary.aerocyte	-0.32334	0.564972
CCDC65	capillary.aerocyte	-0.170688	0.376648
CCDC40	capillary.aerocyte	0.012318	1.50659
CCDC39	capillary.aerocyte	-0.136823	0.188324
ZMYND10	capillary.endothelial.cell	-0.156164	0.830368
TTC12	capillary.endothelial.cell	-0.113735	2.13523
SPAG1	capillary.endothelial.cell	-0.322796	1.66074
RSPH9	capillary.endothelial.cell	-0.17908	0.118624
RSPH4A	capillary.endothelial.cell	-0.142144	0.711744
RSPH3	capillary.endothelial.cell	-0.503675	1.54211
RSPH1	capillary.endothelial.cell	-0.172046	0.237248
NME8	capillary.endothelial.cell	-0.311979	0
NEK10	capillary.endothelial.cell	-0.19062	0.237248
MCIDAS	capillary.endothelial.cell	-0.244702	0
LRRC56	capillary.endothelial.cell	-0.00665638	0.59312
HYDIN	capillary.endothelial.cell	-0.178148	0
GAS8	capillary.endothelial.cell	-0.0732579	2.4911
GAS2L2	capillary.endothelial.cell	-0.167774	0
FOXJ1	capillary.endothelial.cell	-0.17927	0.355872
DRC1	capillary.endothelial.cell	-0.155508	0.118624
DNAJB13	capillary.endothelial.cell	-0.168361	0.118624
DNAI2	capillary.endothelial.cell	-0.174492	0
DNAI1	capillary.endothelial.cell	-0.193421	0
DNAH5	capillary.endothelial.cell	-0.189889	0.355872
DNAH11	capillary.endothelial.cell	-0.20466	0.474496
DNAAF5	capillary.endothelial.cell	-0.0561102	2.84698
DNAAF4	capillary.endothelial.cell	-0.222204	0.59312
DNAAF3	capillary.endothelial.cell	-0.170667	0
DNAAF2	capillary.endothelial.cell	-0.460523	2.84698
DNAAF1	capillary.endothelial.cell	-0.182168	0.474496
CFAP298	capillary.endothelial.cell	-0.169989	13.2859
CCNO	capillary.endothelial.cell	-0.311537	0.711744
CCDC65	capillary.endothelial.cell	-0.142444	0.59312
CCDC40	capillary.endothelial.cell	-0.15231	0.474496
CCDC39	capillary.endothelial.cell	-0.132827	0.118624
ZMYND10	classical.monocyte	-0.17066	0.28777
TTC12	classical.monocyte	-0.39317	0.935252
SPAG1	classical.monocyte	-0.333941	1.43885
RSPH9	classical.monocyte	-0.174118	0.28777
RSPH4A	classical.monocyte	-0.163184	0.28777
RSPH3	classical.monocyte	-0.261751	4.38849
RSPH1	classical.monocyte	-0.173647	0.143885
NME8	classical.monocyte	0.145731	1.43885
NEK10	classical.monocyte	-0.184313	0.215827
MCIDAS	classical.monocyte	-0.244702	0
LRRC56	classical.monocyte	-0.308159	0.0719425
HYDIN	classical.monocyte	-0.178148	0
GAS8	classical.monocyte	-0.433366	0.935252
GAS2L2	classical.monocyte	-0.167774	0
FOXJ1	classical.monocyte	-0.176396	0.143885
DRC1	classical.monocyte	-0.166644	0
DNAJB13	classical.monocyte	-0.172506	0.0719425
DNAI2	classical.monocyte	-0.168768	0.0719425
DNAI1	classical.monocyte	-0.193421	0
DNAH5	classical.monocyte	-0.193128	0.143885
DNAH11	classical.monocyte	-0.202331	0.719425
DNAAF5	classical.monocyte	-0.499736	3.02158
DNAAF4	classical.monocyte	-0.312175	0.215827
DNAAF3	classical.monocyte	-0.170667	0
DNAAF2	classical.monocyte	-0.589243	3.81295
DNAAF1	classical.monocyte	-0.176092	1.29496
CFAP298	classical.monocyte	-0.471203	10
CCNO	classical.monocyte	-0.345466	0.215827
CCDC65	classical.monocyte	-0.211101	0.0719425
CCDC40	classical.monocyte	-0.191469	0.215827
CCDC39	classical.monocyte	-0.157563	0.143885
ZMYND10	club.cell	-0.160248	1.17302
TTC12	club.cell	0.00192749	4.20332
SPAG1	club.cell	-0.0705114	8.11339
RSPH9	club.cell	-0.174836	0.293255
RSPH4A	club.cell	-0.153207	0.58651
RSPH3	club.cell	0.192177	12.219
RSPH1	club.cell	-0.163425	1.95503
NME8	club.cell	-0.272543	0.195503
NEK10	club.cell	-0.123605	1.66178
MCIDAS	club.cell	0.219769	1.27077
LRRC56	club.cell	0.103363	1.36852
HYDIN	club.cell	-0.13506	1.17302
GAS8	club.cell	0.200034	6.94037
GAS2L2	club.cell	-0.167774	0
FOXJ1	club.cell	-0.117895	2.15054
DRC1	club.cell	-0.157195	0.195503
DNAJB13	club.cell	-0.132536	0.684262
DNAI2	club.cell	-0.169056	0.0977517
DNAI1	club.cell	-0.178412	0.195503
DNAH5	club.cell	-0.0186597	9.67742
DNAH11	club.cell	-0.0663101	5.6696
DNAAF5	club.cell	-0.205434	6.45161
DNAAF4	club.cell	-0.141644	1.46628
DNAAF3	club.cell	-0.166397	0.0977517
DNAAF2	club.cell	0.0845178	9.28641
DNAAF1	club.cell	-0.176723	1.66178
CFAP298	club.cell	0.0146074	29.6188
CCNO	club.cell	0.372168	12.5122
CCDC65	club.cell	-0.177857	0.391007
CCDC40	club.cell	-0.18013	0.782014
CCDC39	club.cell	-0.172628	0.0977517
ZMYND10	dendritic.cell	-0.168394	0.719424
TTC12	dendritic.cell	-0.586617	0.719425
SPAG1	dendritic.cell	-0.316626	4.67626
RSPH9	dendritic.cell	-0.173883	0.359712
RSPH4A	dendritic.cell	-0.175037	0
RSPH3	dendritic.cell	-0.220407	8.99281
RSPH1	dendritic.cell	-0.172524	0.719425
NME8	dendritic.cell	0.123461	2.15827
NEK10	dendritic.cell	-0.19697	0
MCIDAS	dendritic.cell	-0.244702	0
LRRC56	dendritic.cell	-0.371406	0
HYDIN	dendritic.cell	-0.178148	0
GAS8	dendritic.cell	-0.490597	0.719425
GAS2L2	dendritic.cell	-0.167774	0
FOXJ1	dendritic.cell	-0.184667	0
DRC1	dendritic.cell	-0.166644	0
DNAJB13	dendritic.cell	-0.189969	0
DNAI2	dendritic.cell	-0.174492	0
DNAI1	dendritic.cell	-0.193421	0
DNAH5	dendritic.cell	-0.191712	0.719424
DNAH11	dendritic.cell	-0.219223	0.359712
DNAAF5	dendritic.cell	-0.815233	2.8777
DNAAF4	dendritic.cell	-0.204909	1.43885
DNAAF3	dendritic.cell	-0.170667	0
DNAAF2	dendritic.cell	-0.893743	5.7554
DNAAF1	dendritic.cell	-0.188021	0.719425
CFAP298	dendritic.cell	-0.329988	23.3813
CCNO	dendritic.cell	-0.355583	0
CCDC65	dendritic.cell	-0.196054	0.359712
CCDC40	dendritic.cell	-0.226351	0
CCDC39	dendritic.cell	-0.13877	0.359712
ZMYND10	endothelial.cell.of.artery	-0.1765	0
TTC12	endothelial.cell.of.artery	-0.520584	0.621118
SPAG1	endothelial.cell.of.artery	-0.168425	3.72671
RSPH9	endothelial.cell.of.artery	-0.186461	0
RSPH4A	endothelial.cell.of.artery	-0.175037	0
RSPH3	endothelial.cell.of.artery	-0.535033	1.86335
RSPH1	endothelial.cell.of.artery	-0.17524	0
NME8	endothelial.cell.of.artery	-0.311979	0
NEK10	endothelial.cell.of.artery	-0.19697	0
MCIDAS	endothelial.cell.of.artery	-0.244702	0
LRRC56	endothelial.cell.of.artery	-0.221119	0.621118
HYDIN	endothelial.cell.of.artery	-0.178148	0
GAS8	endothelial.cell.of.artery	-0.289645	1.86335
GAS2L2	endothelial.cell.of.artery	-0.167774	0
FOXJ1	endothelial.cell.of.artery	-0.184667	0
DRC1	endothelial.cell.of.artery	-0.166644	0
DNAJB13	endothelial.cell.of.artery	-0.189969	0
DNAI2	endothelial.cell.of.artery	-0.174492	0
DNAI1	endothelial.cell.of.artery	-0.193421	0
DNAH5	endothelial.cell.of.artery	-0.197632	0
DNAH11	endothelial.cell.of.artery	-0.227392	0
DNAAF5	endothelial.cell.of.artery	-0.00210085	5.59006
DNAAF4	endothelial.cell.of.artery	-0.350511	0
DNAAF3	endothelial.cell.of.artery	-0.170667	0
DNAAF2	endothelial.cell.of.artery	-0.258812	4.96894
DNAAF1	endothelial.cell.of.artery	-0.16688	1.24224
CFAP298	endothelial.cell.of.artery	-0.0347724	22.3603
CCNO	endothelial.cell.of.artery	-0.355583	0
CCDC65	endothelial.cell.of.artery	-0.164472	0.621118
CCDC40	endothelial.cell.of.artery	-0.161222	1.24224
CCDC39	endothelial.cell.of.artery	-0.187151	0
ZMYND10	endothelial.cell.of.lymphatic.vessel	-0.1765	0
TTC12	endothelial.cell.of.lymphatic.vessel	0.48502	5.55556
SPAG1	endothelial.cell.of.lymphatic.vessel	-0.135194	2.77778
RSPH9	endothelial.cell.of.lymphatic.vessel	-0.186461	0
RSPH4A	endothelial.cell.of.lymphatic.vessel	-0.175037	0
RSPH3	endothelial.cell.of.lymphatic.vessel	0.722359	16.6667
RSPH1	endothelial.cell.of.lymphatic.vessel	-0.17524	0
NME8	endothelial.cell.of.lymphatic.vessel	-0.311979	0
NEK10	endothelial.cell.of.lymphatic.vessel	-0.19697	0
MCIDAS	endothelial.cell.of.lymphatic.vessel	-0.244702	0
LRRC56	endothelial.cell.of.lymphatic.vessel	-0.371406	0
HYDIN	endothelial.cell.of.lymphatic.vessel	-0.178148	0
GAS8	endothelial.cell.of.lymphatic.vessel	0.648525	11.1111
GAS2L2	endothelial.cell.of.lymphatic.vessel	-0.167774	0
FOXJ1	endothelial.cell.of.lymphatic.vessel	-0.184667	0
DRC1	endothelial.cell.of.lymphatic.vessel	-0.166644	0
DNAJB13	endothelial.cell.of.lymphatic.vessel	-0.189969	0
DNAI2	endothelial.cell.of.lymphatic.vessel	-0.174492	0
DNAI1	endothelial.cell.of.lymphatic.vessel	-0.193421	0
DNAH5	endothelial.cell.of.lymphatic.vessel	-0.197632	0
DNAH11	endothelial.cell.of.lymphatic.vessel	-0.227392	0
DNAAF5	endothelial.cell.of.lymphatic.vessel	1.01461	8.33333
DNAAF4	endothelial.cell.of.lymphatic.vessel	0.355653	2.77778
DNAAF3	endothelial.cell.of.lymphatic.vessel	-0.170667	0
DNAAF2	endothelial.cell.of.lymphatic.vessel	-1.51564	0
DNAAF1	endothelial.cell.of.lymphatic.vessel	-0.195034	0
CFAP298	endothelial.cell.of.lymphatic.vessel	0.377083	30.5556
CCNO	endothelial.cell.of.lymphatic.vessel	-0.355583	0
CCDC65	endothelial.cell.of.lymphatic.vessel	-0.214113	0
CCDC40	endothelial.cell.of.lymphatic.vessel	-0.226351	0
CCDC39	endothelial.cell.of.lymphatic.vessel	-0.187151	0
ZMYND10	fibroblast	-0.1765	0
TTC12	fibroblast	2.1087	22.2222
SPAG1	fibroblast	0.0215491	11.1111
RSPH9	fibroblast	-0.186461	0
RSPH4A	fibroblast	-0.175037	0
RSPH3	fibroblast	0.044662	11.1111
RSPH1	fibroblast	-0.17524	0
NME8	fibroblast	-0.311979	0
NEK10	fibroblast	-0.19697	0
MCIDAS	fibroblast	-0.244702	0
LRRC56	fibroblast	-0.371406	0
HYDIN	fibroblast	-0.178148	0
GAS8	fibroblast	0.999069	11.1111
GAS2L2	fibroblast	-0.167774	0
FOXJ1	fibroblast	-0.184667	0
DRC1	fibroblast	-0.166644	0
DNAJB13	fibroblast	-0.189969	0
DNAI2	fibroblast	-0.174492	0
DNAI1	fibroblast	-0.193421	0
DNAH5	fibroblast	-0.197632	0
DNAH11	fibroblast	0.0687862	11.1111
DNAAF5	fibroblast	-1.17373	0
DNAAF4	fibroblast	1.206	11.1111
DNAAF3	fibroblast	-0.170667	0
DNAAF2	fibroblast	-1.51564	0
DNAAF1	fibroblast	-0.195034	0
CFAP298	fibroblast	-0.279841	22.2222
CCNO	fibroblast	-0.355583	0
CCDC65	fibroblast	-0.214113	0
CCDC40	fibroblast	-0.226351	0
CCDC39	fibroblast	-0.187151	0
ZMYND10	intermediate.monocyte	-0.162563	0.793651
TTC12	intermediate.monocyte	-0.566525	0.396825
SPAG1	intermediate.monocyte	-0.30442	2.38095
RSPH9	intermediate.monocyte	-0.166026	0.396825
RSPH4A	intermediate.monocyte	-0.175037	0
RSPH3	intermediate.monocyte	-0.3458	3.96825
RSPH1	intermediate.monocyte	-0.170095	0.396825
NME8	intermediate.monocyte	-0.311979	0
NEK10	intermediate.monocyte	-0.181648	0.396825
MCIDAS	intermediate.monocyte	-0.244702	0
LRRC56	intermediate.monocyte	-0.371406	0
HYDIN	intermediate.monocyte	-0.178148	0
GAS8	intermediate.monocyte	-0.560472	0
GAS2L2	intermediate.monocyte	-0.0784787	0.396825
FOXJ1	intermediate.monocyte	-0.171458	0.396825
DRC1	intermediate.monocyte	-0.166644	0
DNAJB13	intermediate.monocyte	-0.189969	0
DNAI2	intermediate.monocyte	-0.174492	0
DNAI1	intermediate.monocyte	-0.193421	0
DNAH5	intermediate.monocyte	-0.197632	0
DNAH11	intermediate.monocyte	-0.221505	0.396825
DNAAF5	intermediate.monocyte	-0.34035	3.96825
DNAAF4	intermediate.monocyte	-0.217817	0.396825
DNAAF3	intermediate.monocyte	-0.170667	0
DNAAF2	intermediate.monocyte	-0.723239	3.1746
DNAAF1	intermediate.monocyte	-0.175583	1.19048
CFAP298	intermediate.monocyte	-0.318553	14.2857
CCNO	intermediate.monocyte	-0.355583	0
CCDC65	intermediate.monocyte	-0.214113	0
CCDC40	intermediate.monocyte	-0.226351	0
CCDC39	intermediate.monocyte	-0.187151	0
ZMYND10	lung.ciliated.cell	6.00052	96.1199
TTC12	lung.ciliated.cell	4.97089	39.6825
SPAG1	lung.ciliated.cell	5.84156	77.9541
RSPH9	lung.ciliated.cell	5.99618	88.0071
RSPH4A	lung.ciliated.cell	6.00121	88.8889
RSPH3	lung.ciliated.cell	5.7075	73.0159
RSPH1	lung.ciliated.cell	5.99942	98.2363
NME8	lung.ciliated.cell	-0.311979	0
NEK10	lung.ciliated.cell	5.98166	80.776
MCIDAS	lung.ciliated.cell	0.48157	3.52734
LRRC56	lung.ciliated.cell	5.53074	25.9259
HYDIN	lung.ciliated.cell	6.00016	84.8324
GAS8	lung.ciliated.cell	5.57683	58.3774
GAS2L2	lung.ciliated.cell	6.00125	44.0917
FOXJ1	lung.ciliated.cell	5.99729	86.2434
DRC1	lung.ciliated.cell	6.00192	79.0123
DNAJB13	lung.ciliated.cell	5.98179	55.9083
DNAI2	lung.ciliated.cell	5.99953	68.6067
DNAI1	lung.ciliated.cell	5.95666	58.7302
DNAH5	lung.ciliated.cell	5.99121	92.0635
DNAH11	lung.ciliated.cell	5.9635	93.1217
DNAAF5	lung.ciliated.cell	3.70186	38.448
DNAAF4	lung.ciliated.cell	5.73762	48.3245
DNAAF3	lung.ciliated.cell	6.00136	72.3104
DNAAF2	lung.ciliated.cell	2.74183	34.0388
DNAAF1	lung.ciliated.cell	5.98719	96.1199
CFAP298	lung.ciliated.cell	5.81565	90.4762
CCNO	lung.ciliated.cell	3.06565	42.6808
CCDC65	lung.ciliated.cell	5.96356	70.7231
CCDC40	lung.ciliated.cell	5.98216	65.0794
CCDC39	lung.ciliated.cell	5.99112	38.2716
ZMYND10	lung.microvascular.endothelial.cell	-0.169873	0.416667
TTC12	lung.microvascular.endothelial.cell	-0.443727	1.25
SPAG1	lung.microvascular.endothelial.cell	-0.138548	6.875
RSPH9	lung.microvascular.endothelial.cell	-0.180429	0.208333
RSPH4A	lung.microvascular.endothelial.cell	-0.159728	0.625
RSPH3	lung.microvascular.endothelial.cell	-0.154346	7.5
RSPH1	lung.microvascular.endothelial.cell	-0.168396	1.04167
NME8	lung.microvascular.endothelial.cell	-0.311979	0
NEK10	lung.microvascular.endothelial.cell	-0.185197	0.416667
MCIDAS	lung.microvascular.endothelial.cell	-0.244702	0
LRRC56	lung.microvascular.endothelial.cell	-0.088248	0.625
HYDIN	lung.microvascular.endothelial.cell	-0.178148	0
GAS8	lung.microvascular.endothelial.cell	-0.048752	5.20833
GAS2L2	lung.microvascular.endothelial.cell	-0.14237	0.208333
FOXJ1	lung.microvascular.endothelial.cell	-0.173866	0.208333
DRC1	lung.microvascular.endothelial.cell	-0.154232	0.208333
DNAJB13	lung.microvascular.endothelial.cell	-0.189969	0
DNAI2	lung.microvascular.endothelial.cell	-0.161488	0.208333
DNAI1	lung.microvascular.endothelial.cell	-0.174906	0.208333
DNAH5	lung.microvascular.endothelial.cell	-0.191819	0.416667
DNAH11	lung.microvascular.endothelial.cell	-0.218028	0.625
DNAAF5	lung.microvascular.endothelial.cell	0.0571763	6.66667
DNAAF4	lung.microvascular.endothelial.cell	-0.211693	0.833333
DNAAF3	lung.microvascular.endothelial.cell	-0.151032	0.208333
DNAAF2	lung.microvascular.endothelial.cell	-0.295705	6.25
DNAAF1	lung.microvascular.endothelial.cell	-0.190021	0.416667
CFAP298	lung.microvascular.endothelial.cell	-0.161507	21.6667
CCNO	lung.microvascular.endothelial.cell	-0.311884	0.833333
CCDC65	lung.microvascular.endothelial.cell	-0.206633	0.208333
CCDC40	lung.microvascular.endothelial.cell	-0.207799	0.416667
CCDC39	lung.microvascular.endothelial.cell	-0.187151	0
ZMYND10	macrophage	-0.170648	0.939006
TTC12	macrophage	-0.419813	3.29068
SPAG1	macrophage	-0.340177	6.3653
RSPH9	macrophage	-0.183024	0.282533
RSPH4A	macrophage	-0.168871	0.423799
RSPH3	macrophage	0.527891	34.6934
RSPH1	macrophage	-0.172188	0.855908
NME8	macrophage	-0.296231	0.141266
NEK10	macrophage	-0.190296	0.299152
MCIDAS	macrophage	-0.242535	0.0166196
LRRC56	macrophage	-0.314943	0.315772
HYDIN	macrophage	-0.148658	1.47914
GAS8	macrophage	-0.423073	3.24913
GAS2L2	macrophage	-0.164824	0.0498587
FOXJ1	macrophage	-0.181736	0.207745
DRC1	macrophage	-0.162848	0.174506
DNAJB13	macrophage	-0.187336	0.0747881
DNAI2	macrophage	-0.169474	0.174506
DNAI1	macrophage	-0.189429	0.0997175
DNAH5	macrophage	-0.193234	0.481968
DNAH11	macrophage	-0.219885	0.573375
DNAAF5	macrophage	-0.461732	9.9302
DNAAF4	macrophage	0.0692677	7.43726
DNAAF3	macrophage	-0.162304	0.324082
DNAAF2	macrophage	-0.728814	10.2958
DNAAF1	macrophage	-0.188254	0.79774
CFAP298	macrophage	-0.226615	43.053
CCNO	macrophage	-0.345157	0.415489
CCDC65	macrophage	-0.209269	0.166196
CCDC40	macrophage	-0.0834634	4.18813
CCDC39	macrophage	-0.177067	0.0997175
ZMYND10	mesothelial.cell	-0.1765	0
TTC12	mesothelial.cell	0.754807	18.75
SPAG1	mesothelial.cell	-0.157952	12.5
RSPH9	mesothelial.cell	-0.120603	6.25
RSPH4A	mesothelial.cell	-0.175037	0
RSPH3	mesothelial.cell	0.249974	37.5
RSPH1	mesothelial.cell	-0.17524	0
NME8	mesothelial.cell	-0.311979	0
NEK10	mesothelial.cell	-0.19697	0
MCIDAS	mesothelial.cell	-0.244702	0
LRRC56	mesothelial.cell	-0.00245503	6.25
HYDIN	mesothelial.cell	-0.178148	0
GAS8	mesothelial.cell	0.00900482	12.5
GAS2L2	mesothelial.cell	-0.167774	0
FOXJ1	mesothelial.cell	-0.184667	0
DRC1	mesothelial.cell	-0.166644	0
DNAJB13	mesothelial.cell	-0.189969	0
DNAI2	mesothelial.cell	-0.174492	0
DNAI1	mesothelial.cell	-0.193421	0
DNAH5	mesothelial.cell	-0.181554	6.25
DNAH11	mesothelial.cell	-0.227392	0
DNAAF5	mesothelial.cell	1.53207	37.5
DNAAF4	mesothelial.cell	-0.135855	6.25
DNAAF3	mesothelial.cell	-0.170667	0
DNAAF2	mesothelial.cell	0.93958	25
DNAAF1	mesothelial.cell	-0.185281	6.25
CFAP298	mesothelial.cell	-0.282967	43.75
CCNO	mesothelial.cell	-0.267036	6.25
CCDC65	mesothelial.cell	-0.214113	0
CCDC40	mesothelial.cell	-0.157604	6.25
CCDC39	mesothelial.cell	-0.187151	0
ZMYND10	myofibroblast.cell	-0.1765	0
TTC12	myofibroblast.cell	0.145867	10
SPAG1	myofibroblast.cell	-0.228858	20
RSPH9	myofibroblast.cell	-0.0576187	10
RSPH4A	myofibroblast.cell	-0.0897865	10
RSPH3	myofibroblast.cell	0.27526	10
RSPH1	myofibroblast.cell	-0.131409	10
NME8	myofibroblast.cell	-0.311979	0
NEK10	myofibroblast.cell	-0.19697	0
MCIDAS	myofibroblast.cell	-0.244702	0
LRRC56	myofibroblast.cell	-0.371406	0
HYDIN	myofibroblast.cell	-0.178148	0
GAS8	myofibroblast.cell	-0.560472	0
GAS2L2	myofibroblast.cell	-0.167774	0
FOXJ1	myofibroblast.cell	-0.184667	0
DRC1	myofibroblast.cell	-0.166644	0
DNAJB13	myofibroblast.cell	-0.189969	0
DNAI2	myofibroblast.cell	-0.174492	0
DNAI1	myofibroblast.cell	-0.193421	0
DNAH5	myofibroblast.cell	-0.197632	0
DNAH11	myofibroblast.cell	-0.227392	0
DNAAF5	myofibroblast.cell	-1.17373	0
DNAAF4	myofibroblast.cell	-0.350511	0
DNAAF3	myofibroblast.cell	-0.170667	0
DNAAF2	myofibroblast.cell	-0.328959	20
DNAAF1	myofibroblast.cell	-0.195034	0
CFAP298	myofibroblast.cell	0.219978	50
CCNO	myofibroblast.cell	-0.355583	0
CCDC65	myofibroblast.cell	-0.214113	0
CCDC40	myofibroblast.cell	-0.226351	0
CCDC39	myofibroblast.cell	-0.187151	0
ZMYND10	neutrophil	-0.164944	0.724638
TTC12	neutrophil	-0.658248	0
SPAG1	neutrophil	-0.164093	2.89855
RSPH9	neutrophil	-0.147205	0.724638
RSPH4A	neutrophil	-0.175037	0
RSPH3	neutrophil	-0.156932	3.62319
RSPH1	neutrophil	-0.16554	0.724638
NME8	neutrophil	-0.118168	0.724638
NEK10	neutrophil	-0.118571	0.724638
MCIDAS	neutrophil	-0.244702	0
LRRC56	neutrophil	-0.371406	0
HYDIN	neutrophil	-0.0857815	0.724638
GAS8	neutrophil	-0.560472	0
GAS2L2	neutrophil	-0.167774	0
FOXJ1	neutrophil	-0.184667	0
DRC1	neutrophil	-0.166644	0
DNAJB13	neutrophil	-0.0547757	0.724638
DNAI2	neutrophil	-0.111402	0.724638
DNAI1	neutrophil	-0.193421	0
DNAH5	neutrophil	-0.156077	0.724638
DNAH11	neutrophil	-0.206178	0.724638
DNAAF5	neutrophil	-0.876779	0.724638
DNAAF4	neutrophil	-0.350511	0
DNAAF3	neutrophil	-0.170667	0
DNAAF2	neutrophil	-1.2093	0.724638
DNAAF1	neutrophil	-0.0886296	2.17391
CFAP298	neutrophil	-0.768218	1.44928
CCNO	neutrophil	-0.355583	0
CCDC65	neutrophil	-0.177411	0.724638
CCDC40	neutrophil	-0.167124	0.724638
CCDC39	neutrophil	-0.187151	0
ZMYND10	nk.cell	-0.103333	2.38095
TTC12	nk.cell	0.202137	2.38095
SPAG1	nk.cell	-0.112221	3.96825
RSPH9	nk.cell	-0.186461	0
RSPH4A	nk.cell	-0.143092	0.793651
RSPH3	nk.cell	-0.218457	3.1746
RSPH1	nk.cell	-0.135947	1.5873
NME8	nk.cell	4.86112	10.3175
NEK10	nk.cell	-0.0601366	0.793651
MCIDAS	nk.cell	-0.244702	0
LRRC56	nk.cell	0.599802	1.5873
HYDIN	nk.cell	-0.178148	0
GAS8	nk.cell	-0.11597	2.38095
GAS2L2	nk.cell	-0.167774	0
FOXJ1	nk.cell	-0.184667	0
DRC1	nk.cell	-0.166644	0
DNAJB13	nk.cell	-0.189969	0
DNAI2	nk.cell	-0.174492	0
DNAI1	nk.cell	-0.193421	0
DNAH5	nk.cell	-0.139301	0.793651
DNAH11	nk.cell	-0.158459	1.5873
DNAAF5	nk.cell	-0.571847	1.5873
DNAAF4	nk.cell	-0.350511	0
DNAAF3	nk.cell	-0.170667	0
DNAAF2	nk.cell	0.992354	7.14286
DNAAF1	nk.cell	-0.0652928	0.793651
CFAP298	nk.cell	-0.0317856	15.0794
CCNO	nk.cell	-0.355583	0
CCDC65	nk.cell	0.368551	4.7619
CCDC40	nk.cell	-0.143215	0.793651
CCDC39	nk.cell	-0.187151	0
ZMYND10	non.classical.monocyte	-0.169512	0.4004
TTC12	non.classical.monocyte	-0.301409	1.7017
SPAG1	non.classical.monocyte	-0.327674	2.2022
RSPH9	non.classical.monocyte	-0.164173	0.600601
RSPH4A	non.classical.monocyte	-0.16912	0.2002
RSPH3	non.classical.monocyte	-0.267655	5.50551
RSPH1	non.classical.monocyte	-0.17287	0.3003
NME8	non.classical.monocyte	-0.0939882	0.500501
NEK10	non.classical.monocyte	-0.169783	0.500501
MCIDAS	non.classical.monocyte	-0.244702	0
LRRC56	non.classical.monocyte	-0.330587	0.1001
HYDIN	non.classical.monocyte	-0.168854	0.2002
GAS8	non.classical.monocyte	-0.415139	1.1011
GAS2L2	non.classical.monocyte	-0.167774	0
FOXJ1	non.classical.monocyte	-0.165959	0.500501
DRC1	non.classical.monocyte	-0.161021	0.1001
DNAJB13	non.classical.monocyte	-0.189969	0
DNAI2	non.classical.monocyte	-0.167351	0.1001
DNAI1	non.classical.monocyte	-0.184723	0.1001
DNAH5	non.classical.monocyte	-0.18869	0.4004
DNAH11	non.classical.monocyte	-0.197329	0.800801
DNAAF5	non.classical.monocyte	-0.42105	4.004
DNAAF4	non.classical.monocyte	-0.313201	0.3003
DNAAF3	non.classical.monocyte	-0.157172	0.2002
DNAAF2	non.classical.monocyte	-0.4667	5.005
DNAAF1	non.classical.monocyte	-0.167526	1.8018
CFAP298	non.classical.monocyte	-0.485534	10.9109
CCNO	non.classical.monocyte	-0.333094	0.4004
CCDC65	non.classical.monocyte	-0.182506	0.4004
CCDC40	non.classical.monocyte	-0.036547	2.002
CCDC39	non.classical.monocyte	-0.187151	0
ZMYND10	pericyte.cell	-0.148826	1.02564
TTC12	pericyte.cell	0.0673156	2.05128
SPAG1	pericyte.cell	-0.382321	1.53846
RSPH9	pericyte.cell	0.0578273	5.12821
RSPH4A	pericyte.cell	-0.154419	1.02564
RSPH3	pericyte.cell	-0.106816	5.12821
RSPH1	pericyte.cell	-0.17524	0
NME8	pericyte.cell	-0.311979	0
NEK10	pericyte.cell	-0.124083	1.02564
MCIDAS	pericyte.cell	-0.244702	0
LRRC56	pericyte.cell	-0.371406	0
HYDIN	pericyte.cell	-0.157711	0.512821
GAS8	pericyte.cell	-0.483279	0.512821
GAS2L2	pericyte.cell	-0.167774	0
FOXJ1	pericyte.cell	-0.1571	0.512821
DRC1	pericyte.cell	-0.121357	0.512821
DNAJB13	pericyte.cell	-0.189969	0
DNAI2	pericyte.cell	-0.174492	0
DNAI1	pericyte.cell	-0.174602	0.512821
DNAH5	pericyte.cell	-0.197632	0
DNAH11	pericyte.cell	-0.0869613	2.5641
DNAAF5	pericyte.cell	-0.121859	4.10256
DNAAF4	pericyte.cell	-0.350511	0
DNAAF3	pericyte.cell	-0.170667	0
DNAAF2	pericyte.cell	-0.0957304	5.64103
DNAAF1	pericyte.cell	-0.186135	0.512821
CFAP298	pericyte.cell	0.0432018	17.4359
CCNO	pericyte.cell	-0.127748	1.53846
CCDC65	pericyte.cell	-0.111921	1.02564
CCDC40	pericyte.cell	-0.141086	0.512821
CCDC39	pericyte.cell	-0.187151	0
ZMYND10	plasma.cell	-0.173512	0.8
TTC12	plasma.cell	-0.416831	3.2
SPAG1	plasma.cell	-0.336709	7.2
RSPH9	plasma.cell	-0.170869	0.8
RSPH4A	plasma.cell	-0.168768	0.8
RSPH3	plasma.cell	-0.579149	4.8
RSPH1	plasma.cell	-0.164639	2.4
NME8	plasma.cell	-0.311979	0
NEK10	plasma.cell	-0.19697	0
MCIDAS	plasma.cell	-0.244702	0
LRRC56	plasma.cell	0.0101637	3.2
HYDIN	plasma.cell	-0.178148	0
GAS8	plasma.cell	-0.453789	3.2
GAS2L2	plasma.cell	-0.167774	0
FOXJ1	plasma.cell	-0.184667	0
DRC1	plasma.cell	-0.144766	0.8
DNAJB13	plasma.cell	-0.189969	0
DNAI2	plasma.cell	-0.165686	0.8
DNAI1	plasma.cell	-0.193421	0
DNAH5	plasma.cell	-0.195724	0.8
DNAH11	plasma.cell	-0.224897	0.8
DNAAF5	plasma.cell	-0.579146	6.4
DNAAF4	plasma.cell	-0.350511	0
DNAAF3	plasma.cell	-0.170667	0
DNAAF2	plasma.cell	-0.818855	10.4
DNAAF1	plasma.cell	0.209096	23.2
CFAP298	plasma.cell	-0.518335	26.4
CCNO	plasma.cell	-0.355583	0
CCDC65	plasma.cell	-0.214113	0
CCDC40	plasma.cell	-0.226351	0
CCDC39	plasma.cell	-0.187151	0
ZMYND10	plasmacytoid.dendritic.cell	-0.1765	0
TTC12	plasmacytoid.dendritic.cell	-0.658248	0
SPAG1	plasmacytoid.dendritic.cell	-0.467396	0
RSPH9	plasmacytoid.dendritic.cell	-0.186461	0
RSPH4A	plasmacytoid.dendritic.cell	-0.175037	0
RSPH3	plasmacytoid.dendritic.cell	-0.123214	5.88235
RSPH1	plasmacytoid.dendritic.cell	0.00881812	17.6471
NME8	plasmacytoid.dendritic.cell	3.11406	11.7647
NEK10	plasmacytoid.dendritic.cell	-0.19697	0
MCIDAS	plasmacytoid.dendritic.cell	-0.244702	0
LRRC56	plasmacytoid.dendritic.cell	1.81828	5.88235
HYDIN	plasmacytoid.dendritic.cell	-0.178148	0
GAS8	plasmacytoid.dendritic.cell	-0.560472	0
GAS2L2	plasmacytoid.dendritic.cell	-0.167774	0
FOXJ1	plasmacytoid.dendritic.cell	-0.184667	0
DRC1	plasmacytoid.dendritic.cell	-0.166644	0
DNAJB13	plasmacytoid.dendritic.cell	-0.189969	0
DNAI2	plasmacytoid.dendritic.cell	-0.174492	0
DNAI1	plasmacytoid.dendritic.cell	-0.193421	0
DNAH5	plasmacytoid.dendritic.cell	-0.197632	0
DNAH11	plasmacytoid.dendritic.cell	-0.227392	0
DNAAF5	plasmacytoid.dendritic.cell	-1.17373	0
DNAAF4	plasmacytoid.dendritic.cell	-0.350511	0
DNAAF3	plasmacytoid.dendritic.cell	-0.170667	0
DNAAF2	plasmacytoid.dendritic.cell	-0.307413	5.88235
DNAAF1	plasmacytoid.dendritic.cell	-0.113388	5.88235
CFAP298	plasmacytoid.dendritic.cell	-0.520947	11.7647
CCNO	plasmacytoid.dendritic.cell	-0.355583	0
CCDC65	plasmacytoid.dendritic.cell	-0.214113	0
CCDC40	plasmacytoid.dendritic.cell	-0.226351	0
CCDC39	plasmacytoid.dendritic.cell	-0.187151	0
ZMYND10	pulmonary.ionocyte	-0.0532627	5.26316
TTC12	pulmonary.ionocyte	-0.658248	0
SPAG1	pulmonary.ionocyte	0.232718	10.5263
RSPH9	pulmonary.ionocyte	-0.186461	0
RSPH4A	pulmonary.ionocyte	-0.175037	0
RSPH3	pulmonary.ionocyte	-0.163679	10.5263
RSPH1	pulmonary.ionocyte	-0.17524	0
NME8	pulmonary.ionocyte	-0.311979	0
NEK10	pulmonary.ionocyte	-0.0237013	5.26316
MCIDAS	pulmonary.ionocyte	-0.244702	0
LRRC56	pulmonary.ionocyte	-0.371406	0
HYDIN	pulmonary.ionocyte	-0.178148	0
GAS8	pulmonary.ionocyte	0.295063	10.5263
GAS2L2	pulmonary.ionocyte	-0.167774	0
FOXJ1	pulmonary.ionocyte	-0.0688931	5.26316
DRC1	pulmonary.ionocyte	-0.166644	0
DNAJB13	pulmonary.ionocyte	0.279384	5.26316
DNAI2	pulmonary.ionocyte	-0.174492	0
DNAI1	pulmonary.ionocyte	-0.193421	0
DNAH5	pulmonary.ionocyte	0.0239574	5.26316
DNAH11	pulmonary.ionocyte	0.11198	5.26316
DNAAF5	pulmonary.ionocyte	0.997828	15.7895
DNAAF4	pulmonary.ionocyte	0.234539	5.26316
DNAAF3	pulmonary.ionocyte	-0.170667	0
DNAAF2	pulmonary.ionocyte	1.17866	21.0526
DNAAF1	pulmonary.ionocyte	-0.0606165	5.26316
CFAP298	pulmonary.ionocyte	0.212037	36.8421
CCNO	pulmonary.ionocyte	0.193132	15.7895
CCDC65	pulmonary.ionocyte	0.0445961	5.26316
CCDC40	pulmonary.ionocyte	0.0894685	5.26316
CCDC39	pulmonary.ionocyte	-0.187151	0
ZMYND10	respiratory.goblet.cell	-0.140484	4.29958
TTC12	respiratory.goblet.cell	-0.114118	8.46047
SPAG1	respiratory.goblet.cell	0.231005	24.9653
RSPH9	respiratory.goblet.cell	-0.169815	1.52566
RSPH4A	respiratory.goblet.cell	-0.150125	1.80305
RSPH3	respiratory.goblet.cell	-0.0660446	22.3301
RSPH1	respiratory.goblet.cell	-0.147578	7.2122
NME8	respiratory.goblet.cell	-0.300665	0.138696
NEK10	respiratory.goblet.cell	-0.16729	2.08044
MCIDAS	respiratory.goblet.cell	1.4761	9.98613
LRRC56	respiratory.goblet.cell	-0.226717	1.24827
HYDIN	respiratory.goblet.cell	-0.121582	3.05132
GAS8	respiratory.goblet.cell	-0.0878308	10.5409
GAS2L2	respiratory.goblet.cell	-0.165485	0.138696
FOXJ1	respiratory.goblet.cell	-0.0292521	4.43828
DRC1	respiratory.goblet.cell	-0.136641	1.80305
DNAJB13	respiratory.goblet.cell	-0.158982	1.24827
DNAI2	respiratory.goblet.cell	-0.166808	0.416089
DNAI1	respiratory.goblet.cell	-0.183927	0.416089
DNAH5	respiratory.goblet.cell	-0.104368	11.3731
DNAH11	respiratory.goblet.cell	-0.195846	2.91262
DNAAF5	respiratory.goblet.cell	-0.388867	11.6505
DNAAF4	respiratory.goblet.cell	-0.176089	2.49653
DNAAF3	respiratory.goblet.cell	-0.13969	1.38696
DNAAF2	respiratory.goblet.cell	-0.324658	15.534
DNAAF1	respiratory.goblet.cell	-0.18314	1.66436
CFAP298	respiratory.goblet.cell	-0.112204	45.4924
CCNO	respiratory.goblet.cell	4.81043	66.4355
CCDC65	respiratory.goblet.cell	-0.1608	0.970874
CCDC40	respiratory.goblet.cell	-0.167912	2.49653
CCDC39	respiratory.goblet.cell	-0.118474	0.416089
ZMYND10	respiratory.mucous.cell	-0.1765	0
TTC12	respiratory.mucous.cell	0.678289	12.5
SPAG1	respiratory.mucous.cell	0.204354	37.5
RSPH9	respiratory.mucous.cell	-0.186461	0
RSPH4A	respiratory.mucous.cell	-0.175037	0
RSPH3	respiratory.mucous.cell	0.0414759	37.5
RSPH1	respiratory.mucous.cell	-0.166969	12.5
NME8	respiratory.mucous.cell	-0.311979	0
NEK10	respiratory.mucous.cell	-0.19697	0
MCIDAS	respiratory.mucous.cell	5.70903	37.5
LRRC56	respiratory.mucous.cell	-0.371406	0
HYDIN	respiratory.mucous.cell	-0.0823435	12.5
GAS8	respiratory.mucous.cell	0.0733498	25
GAS2L2	respiratory.mucous.cell	-0.167774	0
FOXJ1	respiratory.mucous.cell	-0.184667	0
DRC1	respiratory.mucous.cell	-0.166644	0
DNAJB13	respiratory.mucous.cell	-0.189969	0
DNAI2	respiratory.mucous.cell	-0.0145121	12.5
DNAI1	respiratory.mucous.cell	0.540895	12.5
DNAH5	respiratory.mucous.cell	0.0347476	37.5
DNAH11	respiratory.mucous.cell	0.199593	12.5
DNAAF5	respiratory.mucous.cell	0.0658797	25
DNAAF4	respiratory.mucous.cell	-0.350511	0
DNAAF3	respiratory.mucous.cell	-0.100969	12.5
DNAAF2	respiratory.mucous.cell	-1.51564	0
DNAAF1	respiratory.mucous.cell	-0.173728	12.5
CFAP298	respiratory.mucous.cell	-0.482072	50
CCNO	respiratory.mucous.cell	0.845753	62.5
CCDC65	respiratory.mucous.cell	-0.214113	0
CCDC40	respiratory.mucous.cell	-0.226351	0
CCDC39	respiratory.mucous.cell	-0.187151	0
ZMYND10	serous.cell.of.epithelium.of.bronchus	-0.1765	0
TTC12	serous.cell.of.epithelium.of.bronchus	-0.448817	7.69231
SPAG1	serous.cell.of.epithelium.of.bronchus	-0.379037	7.69231
RSPH9	serous.cell.of.epithelium.of.bronchus	-0.186461	0
RSPH4A	serous.cell.of.epithelium.of.bronchus	-0.175037	0
RSPH3	serous.cell.of.epithelium.of.bronchus	-0.541007	7.69231
RSPH1	serous.cell.of.epithelium.of.bronchus	-0.17524	0
NME8	serous.cell.of.epithelium.of.bronchus	-0.311979	0
NEK10	serous.cell.of.epithelium.of.bronchus	-0.19697	0
MCIDAS	serous.cell.of.epithelium.of.bronchus	-0.244702	0
LRRC56	serous.cell.of.epithelium.of.bronchus	-0.371406	0
HYDIN	serous.cell.of.epithelium.of.bronchus	-0.178148	0
GAS8	serous.cell.of.epithelium.of.bronchus	-0.15464	23.0769
GAS2L2	serous.cell.of.epithelium.of.bronchus	-0.167774	0
FOXJ1	serous.cell.of.epithelium.of.bronchus	-0.184667	0
DRC1	serous.cell.of.epithelium.of.bronchus	-0.166644	0
DNAJB13	serous.cell.of.epithelium.of.bronchus	-0.189969	0
DNAI2	serous.cell.of.epithelium.of.bronchus	-0.174492	0
DNAI1	serous.cell.of.epithelium.of.bronchus	-0.193421	0
DNAH5	serous.cell.of.epithelium.of.bronchus	-0.103396	7.69231
DNAH11	serous.cell.of.epithelium.of.bronchus	-0.227392	0
DNAAF5	serous.cell.of.epithelium.of.bronchus	-1.17373	0
DNAAF4	serous.cell.of.epithelium.of.bronchus	-0.0382678	7.69231
DNAAF3	serous.cell.of.epithelium.of.bronchus	-0.170667	0
DNAAF2	serous.cell.of.epithelium.of.bronchus	-0.579413	7.69231
DNAAF1	serous.cell.of.epithelium.of.bronchus	-0.195034	0
CFAP298	serous.cell.of.epithelium.of.bronchus	-0.340924	53.8462
CCNO	serous.cell.of.epithelium.of.bronchus	0.059391	38.4615
CCDC65	serous.cell.of.epithelium.of.bronchus	-0.214113	0
CCDC40	serous.cell.of.epithelium.of.bronchus	-0.226351	0
CCDC39	serous.cell.of.epithelium.of.bronchus	-0.187151	0
ZMYND10	smooth.muscle.cell	-0.1765	0
TTC12	smooth.muscle.cell	-0.658248	0
SPAG1	smooth.muscle.cell	-0.350134	4
RSPH9	smooth.muscle.cell	-0.186461	0
RSPH4A	smooth.muscle.cell	-0.175037	0
RSPH3	smooth.muscle.cell	-0.656637	0
RSPH1	smooth.muscle.cell	-0.17524	0
NME8	smooth.muscle.cell	-0.311979	0
NEK10	smooth.muscle.cell	-0.19697	0
MCIDAS	smooth.muscle.cell	-0.244702	0
LRRC56	smooth.muscle.cell	-0.371406	0
HYDIN	smooth.muscle.cell	-0.178148	0
GAS8	smooth.muscle.cell	0.216876	4
GAS2L2	smooth.muscle.cell	-0.167774	0
FOXJ1	smooth.muscle.cell	-0.184667	0
DRC1	smooth.muscle.cell	-0.166644	0
DNAJB13	smooth.muscle.cell	-0.189969	0
DNAI2	smooth.muscle.cell	-0.174492	0
DNAI1	smooth.muscle.cell	-0.193421	0
DNAH5	smooth.muscle.cell	-0.197632	0
DNAH11	smooth.muscle.cell	-0.227392	0
DNAAF5	smooth.muscle.cell	2.02852	16
DNAAF4	smooth.muscle.cell	0.0621499	4
DNAAF3	smooth.muscle.cell	-0.170667	0
DNAAF2	smooth.muscle.cell	2.62394	24
DNAAF1	smooth.muscle.cell	-0.195034	0
CFAP298	smooth.muscle.cell	-0.162877	32
CCNO	smooth.muscle.cell	-0.355583	0
CCDC65	smooth.muscle.cell	-0.214113	0
CCDC40	smooth.muscle.cell	0.0205057	4
CCDC39	smooth.muscle.cell	-0.187151	0
ZMYND10	type.i.pneumocyte	-0.154443	2.94118
TTC12	type.i.pneumocyte	-0.0808872	4.90196
SPAG1	type.i.pneumocyte	0.593269	24.5098
RSPH9	type.i.pneumocyte	-0.151651	0.980392
RSPH4A	type.i.pneumocyte	-0.175037	0
RSPH3	type.i.pneumocyte	0.342218	16.6667
RSPH1	type.i.pneumocyte	-0.153204	3.43137
NME8	type.i.pneumocyte	-0.311979	0
NEK10	type.i.pneumocyte	-0.19697	0
MCIDAS	type.i.pneumocyte	-0.244702	0
LRRC56	type.i.pneumocyte	-0.261122	0.980392
HYDIN	type.i.pneumocyte	-0.172261	0.490196
GAS8	type.i.pneumocyte	0.545372	13.2353
GAS2L2	type.i.pneumocyte	-0.167774	0
FOXJ1	type.i.pneumocyte	-0.089795	3.43137
DRC1	type.i.pneumocyte	-0.166644	0
DNAJB13	type.i.pneumocyte	-0.0217897	1.47059
DNAI2	type.i.pneumocyte	-0.174492	0
DNAI1	type.i.pneumocyte	-0.125078	0.980392
DNAH5	type.i.pneumocyte	-0.160657	2.94118
DNAH11	type.i.pneumocyte	0.167732	10.2941
DNAAF5	type.i.pneumocyte	0.466692	12.2549
DNAAF4	type.i.pneumocyte	0.266679	4.41176
DNAAF3	type.i.pneumocyte	-0.140732	0.490196
DNAAF2	type.i.pneumocyte	0.094802	11.7647
DNAAF1	type.i.pneumocyte	-0.177485	2.45098
CFAP298	type.i.pneumocyte	0.227179	40.6863
CCNO	type.i.pneumocyte	-0.348073	0.490196
CCDC65	type.i.pneumocyte	-0.187006	0.980392
CCDC40	type.i.pneumocyte	-0.0970433	2.45098
CCDC39	type.i.pneumocyte	-0.187151	0
ZMYND10	type.ii.pneumocyte	-0.135307	6.52543
TTC12	type.ii.pneumocyte	-0.162221	9.67486
SPAG1	type.ii.pneumocyte	0.293944	37.5439
RSPH9	type.ii.pneumocyte	-0.180409	0.838337
RSPH4A	type.ii.pneumocyte	-0.164166	1.14422
RSPH3	type.ii.pneumocyte	-0.0237064	26.9741
RSPH1	type.ii.pneumocyte	-0.162283	5.58514
NME8	type.ii.pneumocyte	-0.309258	0.0339866
NEK10	type.ii.pneumocyte	-0.1887	0.623088
MCIDAS	type.ii.pneumocyte	-0.235335	0.0453155
LRRC56	type.ii.pneumocyte	-0.180378	1.88059
HYDIN	type.ii.pneumocyte	-0.158884	1.6087
GAS8	type.ii.pneumocyte	0.0104852	18.1828
GAS2L2	type.ii.pneumocyte	-0.157274	0.30588
FOXJ1	type.ii.pneumocyte	-0.152612	4.13504
DRC1	type.ii.pneumocyte	-0.163377	0.237906
DNAJB13	type.ii.pneumocyte	-0.175744	0.339866
DNAI2	type.ii.pneumocyte	-0.17033	0.169933
DNAI1	type.ii.pneumocyte	-0.187582	0.226577
DNAH5	type.ii.pneumocyte	-0.0709555	19.5876
DNAH11	type.ii.pneumocyte	-0.170943	7.23915
DNAAF5	type.ii.pneumocyte	0.145409	25.3767
DNAAF4	type.ii.pneumocyte	-0.120447	5.6871
DNAAF3	type.ii.pneumocyte	-0.139307	1.41611
DNAAF2	type.ii.pneumocyte	-0.241337	22.6917
DNAAF1	type.ii.pneumocyte	-0.186469	1.99388
CFAP298	type.ii.pneumocyte	-0.0497288	58.7855
CCNO	type.ii.pneumocyte	-0.329371	1.0989
CCDC65	type.ii.pneumocyte	-0.203606	0.521128
CCDC40	type.ii.pneumocyte	-0.132349	4.63351
CCDC39	type.ii.pneumocyte	-0.166465	0.351195
ZMYND10	vascular.associated.smooth.muscle.cell	-0.1765	0
TTC12	vascular.associated.smooth.muscle.cell	-0.658248	0
SPAG1	vascular.associated.smooth.muscle.cell	-0.261973	2.8169
RSPH9	vascular.associated.smooth.muscle.cell	-0.122031	2.8169
RSPH4A	vascular.associated.smooth.muscle.cell	-0.12932	1.40845
RSPH3	vascular.associated.smooth.muscle.cell	-0.223461	4.22535
RSPH1	vascular.associated.smooth.muscle.cell	-0.17524	0
NME8	vascular.associated.smooth.muscle.cell	-0.311979	0
NEK10	vascular.associated.smooth.muscle.cell	-0.19697	0
MCIDAS	vascular.associated.smooth.muscle.cell	-0.244702	0
LRRC56	vascular.associated.smooth.muscle.cell	-0.371406	0
HYDIN	vascular.associated.smooth.muscle.cell	-0.178148	0
GAS8	vascular.associated.smooth.muscle.cell	0.00119997	4.22535
GAS2L2	vascular.associated.smooth.muscle.cell	-0.167774	0
FOXJ1	vascular.associated.smooth.muscle.cell	-0.184667	0
DRC1	vascular.associated.smooth.muscle.cell	-0.166644	0
DNAJB13	vascular.associated.smooth.muscle.cell	-0.189969	0
DNAI2	vascular.associated.smooth.muscle.cell	-0.174492	0
DNAI1	vascular.associated.smooth.muscle.cell	0.0206563	1.40845
DNAH5	vascular.associated.smooth.muscle.cell	-0.160157	1.40845
DNAH11	vascular.associated.smooth.muscle.cell	-0.227392	0
DNAAF5	vascular.associated.smooth.muscle.cell	-0.79092	2.8169
DNAAF4	vascular.associated.smooth.muscle.cell	-0.350511	0
DNAAF3	vascular.associated.smooth.muscle.cell	-0.170667	0
DNAAF2	vascular.associated.smooth.muscle.cell	1.64648	12.6761
DNAAF1	vascular.associated.smooth.muscle.cell	-0.183353	1.40845
CFAP298	vascular.associated.smooth.muscle.cell	-0.0413865	22.5352
CCNO	vascular.associated.smooth.muscle.cell	-0.200633	1.40845
CCDC65	vascular.associated.smooth.muscle.cell	-0.214113	0
CCDC40	vascular.associated.smooth.muscle.cell	-0.226351	0
CCDC39	vascular.associated.smooth.muscle.cell	-0.187151	0
ZMYND10	vein.endothelial.cell	-0.16902	0.209205
TTC12	vein.endothelial.cell	-0.356113	1.46443
SPAG1	vein.endothelial.cell	-0.220297	4.60251
RSPH9	vein.endothelial.cell	-0.186461	0
RSPH4A	vein.endothelial.cell	-0.142148	0.627615
RSPH3	vein.endothelial.cell	-0.313633	4.81172
RSPH1	vein.endothelial.cell	-0.165317	1.46443
NME8	vein.endothelial.cell	-0.311979	0
NEK10	vein.endothelial.cell	-0.19697	0
MCIDAS	vein.endothelial.cell	-0.244702	0
LRRC56	vein.endothelial.cell	0.178675	1.04602
HYDIN	vein.endothelial.cell	-0.156475	0.627615
GAS8	vein.endothelial.cell	-0.213919	2.30125
GAS2L2	vein.endothelial.cell	-0.167774	0
FOXJ1	vein.endothelial.cell	-0.184667	0
DRC1	vein.endothelial.cell	-0.166644	0
DNAJB13	vein.endothelial.cell	-0.189969	0
DNAI2	vein.endothelial.cell	-0.165821	0.209205
DNAI1	vein.endothelial.cell	-0.179446	0.209205
DNAH5	vein.endothelial.cell	-0.195604	0.209205
DNAH11	vein.endothelial.cell	-0.219988	0.209205
DNAAF5	vein.endothelial.cell	-0.0334199	5.64854
DNAAF4	vein.endothelial.cell	-0.339395	0.209205
DNAAF3	vein.endothelial.cell	-0.161933	0.209205
DNAAF2	vein.endothelial.cell	-0.349113	6.27615
DNAAF1	vein.endothelial.cell	-0.187016	0.627615
CFAP298	vein.endothelial.cell	-0.051406	21.3389
CCNO	vein.endothelial.cell	-0.306424	1.04603
CCDC65	vein.endothelial.cell	-0.162123	0.627615
CCDC40	vein.endothelial.cell	-0.186084	0.627615
CCDC39	vein.endothelial.cell	-0.159602	0.209205

## Sheet: Figure 1D
Disease\Phenotypic series accession (OMIM)	Disease name (OMIM)	Cell type name	PrEDiCT score	Cell type likely affected by disease (1=Yes, 0=No)
140700	Heinz Body Anemias	cd4-positive, alpha-beta t cell	-0.274365	0
140700	Heinz Body Anemias	cd8-positive, alpha-beta t cell	-0.275162	0
140700	Heinz Body Anemias	cd24 neutrophil	-0.271388	0
140700	Heinz Body Anemias	erythrocyte	3.73251	1
140700	Heinz Body Anemias	erythroid progenitor	0.112106	0
140700	Heinz Body Anemias	granulocyte	-0.274738	0
140700	Heinz Body Anemias	hematopoietic stem cell	-0.275912	0
140700	Heinz Body Anemias	macrophage	-0.276127	0
140700	Heinz Body Anemias	memory b cell	-0.275247	0
140700	Heinz Body Anemias	monocyte	-0.27466	0
140700	Heinz Body Anemias	myeloid progenitor	-0.273406	0
140700	Heinz Body Anemias	naive b cell	-0.275287	0
140700	Heinz Body Anemias	nampt neutrophil	-0.273973	0
140700	Heinz Body Anemias	neutrophil	-0.273404	0
140700	Heinz Body Anemias	nk cell	-0.274779	0
140700	Heinz Body Anemias	plasma cell	-0.276166	0

## Sheet: Figure 1E
Disease\Phenotypic series accession (OMIM)	Disease name (OMIM)	Cell type name	PrEDiCT score	Cell type likely affected by disease (1=Yes, 0=No)
PS124000	Mitochondrial complex III deficiency, nuclear type	capillary endothelial cell	-0.26387	0
PS124000	Mitochondrial complex III deficiency, nuclear type	cd4-positive, alpha-beta t cell	-0.207868	0
PS124000	Mitochondrial complex III deficiency, nuclear type	cd8-positive, alpha-beta t cell	-0.314314	0
PS124000	Mitochondrial complex III deficiency, nuclear type	endothelial cell of artery	-0.115357	0
PS124000	Mitochondrial complex III deficiency, nuclear type	endothelial cell of lymphatic vessel	-0.316919	0
PS124000	Mitochondrial complex III deficiency, nuclear type	endothelial cell of vascular tree	-0.467734	0
PS124000	Mitochondrial complex III deficiency, nuclear type	erythrocyte	-1.23608	0
PS124000	Mitochondrial complex III deficiency, nuclear type	fast muscle cell	2.12443	1
PS124000	Mitochondrial complex III deficiency, nuclear type	macrophage	-0.391003	0
PS124000	Mitochondrial complex III deficiency, nuclear type	mast cell	-0.578009	0
PS124000	Mitochondrial complex III deficiency, nuclear type	mature nk t cell	-0.322833	0
PS124000	Mitochondrial complex III deficiency, nuclear type	mesenchymal stem cell	-0.140922	0
PS124000	Mitochondrial complex III deficiency, nuclear type	mesothelial cell	-0.124216	0
PS124000	Mitochondrial complex III deficiency, nuclear type	pericyte cell	-0.176595	0
PS124000	Mitochondrial complex III deficiency, nuclear type	skeletal muscle satellite stem cell	-0.156529	0
PS124000	Mitochondrial complex III deficiency, nuclear type	slow muscle cell	2.56282	1
PS124000	Mitochondrial complex III deficiency, nuclear type	smooth muscle cell	0.576161	0
PS124000	Mitochondrial complex III deficiency, nuclear type	t cell	-0.311703	0
PS124000	Mitochondrial complex III deficiency, nuclear type	tendon cell	-0.314878	0
PS220110	Mitochondrial complex IV deficiency, nuclear-type	capillary endothelial cell	-0.450987	0
PS220110	Mitochondrial complex IV deficiency, nuclear-type	cd4-positive, alpha-beta t cell	-0.47239	0
PS220110	Mitochondrial complex IV deficiency, nuclear-type	cd8-positive, alpha-beta t cell	-0.32136	0
PS220110	Mitochondrial complex IV deficiency, nuclear-type	endothelial cell of artery	-0.296535	0
PS220110	Mitochondrial complex IV deficiency, nuclear-type	endothelial cell of lymphatic vessel	-0.244605	0
PS220110	Mitochondrial complex IV deficiency, nuclear-type	endothelial cell of vascular tree	-0.494217	0
PS220110	Mitochondrial complex IV deficiency, nuclear-type	erythrocyte	-1.25501	0
PS220110	Mitochondrial complex IV deficiency, nuclear-type	fast muscle cell	1.64347	1
PS220110	Mitochondrial complex IV deficiency, nuclear-type	macrophage	-0.313223	0
PS220110	Mitochondrial complex IV deficiency, nuclear-type	mast cell	0.252619	0
PS220110	Mitochondrial complex IV deficiency, nuclear-type	mature nk t cell	-0.0783945	0
PS220110	Mitochondrial complex IV deficiency, nuclear-type	mesenchymal stem cell	-0.376881	0
PS220110	Mitochondrial complex IV deficiency, nuclear-type	mesothelial cell	0.0598075	0
PS220110	Mitochondrial complex IV deficiency, nuclear-type	pericyte cell	-0.247346	0
PS220110	Mitochondrial complex IV deficiency, nuclear-type	skeletal muscle satellite stem cell	-0.0327957	0
PS220110	Mitochondrial complex IV deficiency, nuclear-type	slow muscle cell	1.83033	1
PS220110	Mitochondrial complex IV deficiency, nuclear-type	smooth muscle cell	0.193934	0
PS220110	Mitochondrial complex IV deficiency, nuclear-type	t cell	-0.339953	0
PS220110	Mitochondrial complex IV deficiency, nuclear-type	tendon cell	-0.224218	0
PS252010	Mitochondrial complex I deficiency, nuclear type	capillary endothelial cell	-0.397608	0
PS252010	Mitochondrial complex I deficiency, nuclear type	cd4-positive, alpha-beta t cell	-0.532736	0
PS252010	Mitochondrial complex I deficiency, nuclear type	cd8-positive, alpha-beta t cell	-0.549922	0
PS252010	Mitochondrial complex I deficiency, nuclear type	endothelial cell of artery	-0.362371	0
PS252010	Mitochondrial complex I deficiency, nuclear type	endothelial cell of lymphatic vessel	-0.202678	0
PS252010	Mitochondrial complex I deficiency, nuclear type	endothelial cell of vascular tree	-0.476565	0
PS252010	Mitochondrial complex I deficiency, nuclear type	erythrocyte	-1.22004	0
PS252010	Mitochondrial complex I deficiency, nuclear type	fast muscle cell	2.21629	1
PS252010	Mitochondrial complex I deficiency, nuclear type	macrophage	-0.398494	0
PS252010	Mitochondrial complex I deficiency, nuclear type	mast cell	-0.154237	0
PS252010	Mitochondrial complex I deficiency, nuclear type	mature nk t cell	-0.124597	0
PS252010	Mitochondrial complex I deficiency, nuclear type	mesenchymal stem cell	-0.282738	0
PS252010	Mitochondrial complex I deficiency, nuclear type	mesothelial cell	0.0427562	0
PS252010	Mitochondrial complex I deficiency, nuclear type	pericyte cell	0.0128458	0
PS252010	Mitochondrial complex I deficiency, nuclear type	skeletal muscle satellite stem cell	-0.238379	0
PS252010	Mitochondrial complex I deficiency, nuclear type	slow muscle cell	2.61869	1
PS252010	Mitochondrial complex I deficiency, nuclear type	smooth muscle cell	0.250023	0
PS252010	Mitochondrial complex I deficiency, nuclear type	t cell	-0.555869	0
PS252010	Mitochondrial complex I deficiency, nuclear type	tendon cell	-0.243332	0
PS252011	Mitochondrial complex II deficiency, nuclear type	capillary endothelial cell	-0.407632	0
PS252011	Mitochondrial complex II deficiency, nuclear type	cd4-positive, alpha-beta t cell	0.0822657	0
PS252011	Mitochondrial complex II deficiency, nuclear type	cd8-positive, alpha-beta t cell	-0.182429	0
PS252011	Mitochondrial complex II deficiency, nuclear type	endothelial cell of artery	-0.285658	0
PS252011	Mitochondrial complex II deficiency, nuclear type	endothelial cell of lymphatic vessel	-0.430101	0
PS252011	Mitochondrial complex II deficiency, nuclear type	endothelial cell of vascular tree	-0.59108	0
PS252011	Mitochondrial complex II deficiency, nuclear type	erythrocyte	-0.879283	0
PS252011	Mitochondrial complex II deficiency, nuclear type	fast muscle cell	3.18738	0
PS252011	Mitochondrial complex II deficiency, nuclear type	macrophage	-0.470681	0
PS252011	Mitochondrial complex II deficiency, nuclear type	mast cell	-0.547692	0
PS252011	Mitochondrial complex II deficiency, nuclear type	mature nk t cell	0.0727965	0
PS252011	Mitochondrial complex II deficiency, nuclear type	mesenchymal stem cell	-0.441321	0
PS252011	Mitochondrial complex II deficiency, nuclear type	mesothelial cell	-0.64974	0
PS252011	Mitochondrial complex II deficiency, nuclear type	pericyte cell	-0.16221	0
PS252011	Mitochondrial complex II deficiency, nuclear type	skeletal muscle satellite stem cell	-0.445242	0
PS252011	Mitochondrial complex II deficiency, nuclear type	slow muscle cell	2.17512	0
PS252011	Mitochondrial complex II deficiency, nuclear type	smooth muscle cell	0.302041	0
PS252011	Mitochondrial complex II deficiency, nuclear type	t cell	-0.137532	0
PS252011	Mitochondrial complex II deficiency, nuclear type	tendon cell	-0.189002	0
PS604273	Mitochondrial complex V (ATP synthase) deficiency, nuclear type	capillary endothelial cell	0.00244242	0
PS604273	Mitochondrial complex V (ATP synthase) deficiency, nuclear type	cd4-positive, alpha-beta t cell	-0.464647	0
PS604273	Mitochondrial complex V (ATP synthase) deficiency, nuclear type	cd8-positive, alpha-beta t cell	-0.400963	0
PS604273	Mitochondrial complex V (ATP synthase) deficiency, nuclear type	endothelial cell of artery	-0.276635	0
PS604273	Mitochondrial complex V (ATP synthase) deficiency, nuclear type	endothelial cell of lymphatic vessel	0.0177658	0
PS604273	Mitochondrial complex V (ATP synthase) deficiency, nuclear type	endothelial cell of vascular tree	1.08627	0
PS604273	Mitochondrial complex V (ATP synthase) deficiency, nuclear type	erythrocyte	-0.747753	0
PS604273	Mitochondrial complex V (ATP synthase) deficiency, nuclear type	fast muscle cell	2.46763	1
PS604273	Mitochondrial complex V (ATP synthase) deficiency, nuclear type	macrophage	-0.448451	0
PS604273	Mitochondrial complex V (ATP synthase) deficiency, nuclear type	mast cell	-0.449806	0
PS604273	Mitochondrial complex V (ATP synthase) deficiency, nuclear type	mature nk t cell	-0.338524	0
PS604273	Mitochondrial complex V (ATP synthase) deficiency, nuclear type	mesenchymal stem cell	-0.388249	0
PS604273	Mitochondrial complex V (ATP synthase) deficiency, nuclear type	mesothelial cell	-0.309862	0
PS604273	Mitochondrial complex V (ATP synthase) deficiency, nuclear type	pericyte cell	-0.311763	0
PS604273	Mitochondrial complex V (ATP synthase) deficiency, nuclear type	skeletal muscle satellite stem cell	-0.28117	0
PS604273	Mitochondrial complex V (ATP synthase) deficiency, nuclear type	slow muscle cell	2.1006	1
PS604273	Mitochondrial complex V (ATP synthase) deficiency, nuclear type	smooth muscle cell	-0.280178	0
PS604273	Mitochondrial complex V (ATP synthase) deficiency, nuclear type	t cell	-0.524732	0
PS604273	Mitochondrial complex V (ATP synthase) deficiency, nuclear type	tendon cell	-0.451973	0

## Sheet: Figure 1F
FDR of PrEDiCT scores	Literature co-appearance (1=Yes, 0=No)
0.528	0
0.528	0
0.9408	0
0.9408	0
0.9408	0
0.717714	0
0.272	0
0.528	0
0.9408	0
0.9408	0
0.717714	0
0.977	0
0.9408	0
0.9408	0
0.4	0
0.9408	0
0.892	0
0.892	0
0.892	0
0.892	1
0	0
0.892	0
0.892	0
0.892	0
0.892	0
0.892	0
0.892	0
0.892	0
0.892	0
0.892	0
0.892	0
0.892	0
0	0
0.0248889	0
1	0
1	0
0	1
0.012	0
0	0
0	0
0	0
1	0
0	0
0	0
1	0
1	0
1	0
1	0
0.528	0
0.954667	0
0.961	0
0.954667	0
0.425143	0
0.425143	0
0.425143	0
0.954667	0
0.425143	0
0.425143	0
0.224	0
0.425143	0
0.954667	0
0.954667	0
0.954667	0
0.954667	0
0.995	0
0.604	0
0.368	0
0.995	0
0.995	0
0.523429	0
0.995	0
0.368	0
0.995	0
0.368	0
0.995	0
0.995	0
0.368	0
0.368	0
0.418667	0
0.995	0
0.997	0
0.997	0
0.36	0
0.997	0
0.997	0
0.36	0
0.997	0
0.248	0
0.997	0
0.16	0
0.997	0
0.997	0
0.16	0
0.248	0
0.997	0
0.997	0
0.974	0
0.486857	0
0.486857	0
0.974	0
0.974	0
0.486857	0
0.974	0
0.974	0
0.974	0
0.486857	0
0.974	0
0.974	0
0.486857	0
0.486857	0
0.486857	0
0.974	0
0.891	0
0.562286	0
0.562286	0
0.891	0
0.891	0
0.048	0
0.891	0
0.891	0
0.891	0
0.562286	0
0.562286	0
0.562286	0
0.891	0
0.891	0
0.562286	0
0.891	0
0.981	0
0.981	0
0.981	0
0.981	0
0.304	0
0.981	0
0.384	0
0.384	0
0.384	0
0.981	0
0.5088	0
0.981	0
0.981	0
0.981	0
0.981	0
0.981	0
0.997	0
0.997	0
0.997	0
0.997	0
0.997	0
0.997	0
0.997	0
0.997	0
0.997	0
0.112	0
0.997	0
0.997	0
0.997	0
0.997	0
0.997	0
0.997	0
0.872	0
0.872	0
0.872	0
0.08	1
0.872	0
0.872	0
0.872	0
0.872	0
0.872	0
0.872	0
0.872	0
0.872	0
0.872	0
0.872	0
0.872	0
0.872	0
0.934	0
0.934	0
0.934	0
0.934	0
0.934	1
0.934	0
0.934	0
0.934	0
0.934	0
0.934	0
0.934	0
0.934	0
0.934	0
0.934	0
0.934	0
0.934	0
0.999	0
0.999	0
0.999	0
0.999	0
0.999	0
0.999	0
0.999	0
0.999	0
0.999	0
0.999	0
0.999	0
0.999	0
0.999	0
0.999	0
0.999	0
0.999	0
0.943	0
0.943	0
0.943	0
0	0
0.943	0
0.943	0
0.943	0
0.943	0
0.943	0
0.943	0
0.943	0
0.943	0
0.943	0
0.943	0
0.943	0
0.943	0
0.861	0
0.861	0
0.861	0
0.096	0
0.861	0
0.861	0
0.861	0
0.861	0
0.861	0
0.861	0
0.861	0
0.861	0
0.861	0
0.861	0
0.861	0
0.861	0
0.999	0
0.476	0
0.999	0
0.999	0
0.999	0
0.476	0
0.413333	0
0.389333	0
0.999	0
0.389333	0
0.999	0
0.999	0
0.389333	0
0.413333	0
0.413333	0
0.999	0
0.88	0
0.888	0
0.048	0
0.999	0
0.999	0
0.999	0
0.999	0
0.999	0
0.999	0
0.56	0
0.999	0
0.999	0
0.016	0
0.016	0
0.999	0
0.999	0
0.993	0
0.993	0
0.3	0
0.3	0
0.993	0
0.993	0
0.993	0
0.993	0
0.993	0
0.993	0
0.993	0
0.993	0
0.3	0
0.3	0
0.8928	0
0.993	0
0.444	0
0.444	0
0.304	0
0.99	0
0.99	0
0.444	0
0.99	0
0.444	0
0.99	0
0.99	0
0.99	0
0.99	0
0.444	0
0.444	0
0.444	0
0.99	0
0.89	0
0.89	0
0.89	0
0.89	0
0.388	0
0.388	0
0.477714	0
0.89	0
0.388	0
0.477714	0
0.208	0
0.477714	0
0.89	0
0.89	0
0.89	0
0.89	0
0.994	0
0.994	0
0.282667	0
0.994	0
0.994	0
0.994	0
0.994	0
0.994	0
0.994	0
0.994	0
0.994	0
0.994	0
0.136	0
0.096	0
0.994	0
0.994	0
0.885	0
0.885	0
0.885	0
0.885	0
0.664	0
0.885	0
0.885	0
0.885	0
0.885	0
0.885	0
0.016	0
0.885	0
0.885	0
0.885	0
0.885	0
0.885	0
0.953	0
0.953	0
0.953	0
0.953	0
0.176	0
0.953	0
0.176	0
0.953	1
0.953	0
0.953	0
0.176	0
0.953	0
0.953	0
0.953	0
0.953	0
0.953	0
0.927	0
0.927	0
0.682667	0
0.927	0
0.927	0
0.927	0
0.927	0
0.927	0
0.927	0
0.78	0
0.927	0
0.927	0
0.256	0
0.064	0
0.927	0
0.927	0
0.934	0
0.6944	0
0.064	0
0.934	0
0.934	0
0.934	0
0.934	0
0.934	0
0.934	0
0.934	0
0.934	0
0.652	0
0.652	0
0.934	0
0.652	0
0.934	0
0.862	0
0.862	0
0.862	0
0.862	0
0.862	0
0.016	1
0.862	0
0.862	0
0.862	0
0.862	0
0.862	0
0.862	0
0.862	0
0.862	0
0.862	0
0.862	0
0.99	0
0.5856	0
0.112	0
0.99	0
0.99	0
0.99	0
0.99	0
0.99	0
0.99	0
0.99	0
0.138667	0
0.99	0
0.99	0
0.138667	0
0.156	0
0.99	0
0.987	0
0.987	0
0.987	0
0.987	0
0.4256	0
0.410667	0
0.384	0
0.987	0
0.987	0
0.112	0
0.4256	0
0.987	0
0.987	0
0.987	0
0.987	0
0.987	0
0.982	0
0.982	0
0.4	0
0.8912	0
0.982	0
0.548	0
0.982	0
0.4	0
0.8912	0
0.4	0
0.982	0
0.786286	0
0.8912	0
0.6784	0
0.786286	0
0.982	0
0.85	0
0.85	0
0.85	0
0.016	1
0.85	0
0.85	0
0.85	0
0.85	0
0.85	0
0.85	0
0.85	0
0.85	0
0.85	0
0.85	0
0.85	0
0.85	0
0.913	0
0.913	0
0.288	0
0.913	0
0.913	0
0.913	1
0.913	0
0.913	0
0.913	0
0.913	0
0.913	0
0.913	0
0.288	0
0.288	0
0.913	0
0.913	0
0.972	0
0.552	0
0.978	0
0.978	0
0.552	0
0.484	0
0.552	0
0.288	0
0.484	0
0.288	0
0.972	0
0.972	0
0.978	0
0.978	0
0.552	0
0.972	0
0.414222	0
0.414222	0
0.959	0
0.959	0
0.414222	0
0.414222	0
0.414222	0
0.414222	0
0.959	0
0.414222	0
0.4368	0
0.959	0
0.959	0
0.959	0
0.414222	0
0.208	1
0.503111	0
0.503111	0
0.503111	0
0.7424	0
0.896	0
0.503111	0
1	0
1	0
1	0
0.503111	0
0.503111	0
0.503111	0
0.808727	0
0.503111	0
0.503111	0
1	0
0.469333	0
0.469333	0
0.469333	0
0.768	0
0.910667	0
0.469333	0
1	0
1	0
1	0
0.469333	0
0.469333	0
0.469333	0
0.900364	0
0.469333	0
0.469333	0
1	0
0.861	0
0.861	0
0.861	0
0.128	0
0.861	0
0.861	0
0.861	0
0.861	0
0.861	0
0.861	0
0.861	0
0.861	0
0.861	0
0.861	0
0.861	0
0.861	0
0.987	0
0.987	0
0.501333	0
0.987	0
0.987	0
0.325333	0
0.987	0
0.136	0
0.987	0
0.136	0
0.987	0
0.987	0
0.4768	0
0.424	0
0.987	0
0.987	0
0.984	0
0.984	0
0.984	0
0.984	0
0.984	0
0.984	0
0.984	0
0.984	0
0.984	0
0.984	1
0.984	0
0.984	0
0.984	0
0.984	0
0.984	0
0.984	0
0.95	0
0.95	0
0.95	0
0	1
0.95	0
0.95	0
0.95	0
0.95	0
0.95	0
0.95	0
0.95	0
0.95	0
0.95	0
0.95	0
0.95	0
0.95	0
0.98	0
0.602	0
0.98	0
0.288	0
0.98	0
0.601143	0
0.601143	0
0.98	0
0.288	0
0	0
0.98	0
0.601143	0
0.98	0
0.98	0
0.568	0
0.98	0
1	0
0.993143	0
0.437333	0
0.993143	0
0.993143	0
0.580571	0
1	0
0.993143	0
0.437333	0
0.437333	0
0.993143	0
0.256	0
0.437333	0
0.437333	0
0.993143	0
0.993143	0
0.972	0
0.972	0
0.972	0
0.972	0
0.972	0
0.7168	0
0.768	0
0.144	0
0.144	0
0.7168	0
0.972	0
0.272	0
0.972	0
0.972	0
0.972	0
0.972	0
0.96	0
0.96	0
0.96	0
0	0
0.12	1
0.96	0
0.9056	0
0.96	0
0.96	0
0.96	0
0.9056	0
0.96	0
0.96	0
0.96	0
0.9056	0
0.96	0
0.907	0
0.907	0
0.907	0
0.16	1
0.907	0
0.907	0
0.907	0
0.907	0
0.907	0
0.907	0
0.907	0
0.907	0
0.907	0
0.907	0
0.907	0
0.907	0
0.888	0
0.888	0
0.888	0
0.112	0
0.888	0
0.888	0
0.888	0
0.888	0
0.888	0
0.888	0
0.888	0
0.888	0
0.888	0
0.888	0
0.888	0
0.888	0
0.871467	0
0.871467	0
0.871467	0
0.048	0
0.871467	0
0.871467	0
0.871467	0
0.871467	0
0.871467	0
0.871467	0
0.871467	0
0.871467	0
0.871467	0
0.871467	0
0.882	0
0.871467	0
0.3808	0
0.445714	0
0.3808	0
0.979	0
0.979	0
0.979	0
0.979	0
0.979	0
0.979	0
0.979	0
0.979	0
0.445714	0
0.3808	0
0.3808	0
0.3808	0
0.979	0
0.9088	0
0.708571	0
0.9088	0
0.9088	0
0.032	0
0.948	0
0.661333	0
0.661333	0
0.9088	0
0.304	0
0.661333	0
0.9088	0
0.9088	0
0.9088	0
0.661333	0
0.9088	0
0.988	0
0.988	0
0.432	0
0.988	0
0.988	1
0.988	0
0.224	0
0.988	0
0.988	0
0.988	0
0.988	1
0.988	0
0.432	0
0.432	0
0.988	0
0.988	0
0.176	0
0.345143	0
0.991	0
0.991	0
0.991	0
0.345143	0
0.991	0
0.991	0
0.991	0
0.176	0
0.176	0
0.991	0
0.991	0
0.176	0
0.345143	0
0.991	0
0.946	0
0.946	0
0.946	0
0.946	0
0.946	0
0.192	0
0.946	0
0.192	0
0.946	0
0.16	0
0.946	0
0.946	0
0.372	0
0.946	0
0.946	0
0.946	0
0.946	0
0.946	0
0.7	0
0.946	0
0.946	0
0.946	0
0.946	0
0.645333	0
0.946	0
0.946	0
0.946	0
0.946	0
0.24	0
0.28	0
0.946	0
0.946	0
0.4	0
0.4	0
0.4	0
0.984	0
0.905333	0
0.4	0
0.4	0
0.4	0
0.4	0
0.4	0
0.408727	0
0.4	0
0.984	0
0.968615	0
0.4	0
0.984	0
0.958	0
0.958	0
0.958	0
0.958	0
0.472	0
0.958	0
0.472	0
0.958	0
0.958	0
0.216	0
0.08	0
0.958	0
0.958	0
0.958	0
0.958	0
0.958	0
0.232	0
0.232	0
0.365714	0
0.995	0
0.995	0
0.995	0
0.995	0
0.995	0
0.298667	0
0.995	0
0.995	0
0.365714	0
0.995	0
0.365714	0
0.365714	0
0.995	0
0.991	0
0.329143	0
0.991	0
0.991	0
0.317333	0
0.317333	0
0.317333	0
0.317333	0
0.991	0
0.317333	0
0.317333	0
0.991	0
0.991	0
0.991	0
0.66	0
0.929778	0
0.427429	0
0.402667	0
0.402667	0
0.402667	0
0.402667	0
0.999	0
0.468	0
0.999	0
0.999	0
0.999	0
0.402667	0
0.999	0
0.999	0
0.999	0
0.402667	0
0.999	0
0.155429	0
0.128	0
0.983	0
0.983	0
0.983	0
0.128	1
0.128	0
0.128	0
0.983	0
0.983	0
0.128	1
0.983	0
0.983	0
0.983	0
0.128	0
0.983	0
1	0
0.0426667	0
1	0
1	0
0.0914286	0
0.012	0
1	0
1	0
0.0128	0
0.012	0
1	0
0.012	0
1	0
1	0
0.012	0
1	0
0.996	0
0.412	0
0.450667	0
0.996	0
0.996	0
0.996	0
0.996	0
0.384	0
0.996	0
0.996	0
0.996	0
0.450667	0
0.412	0
0.996	0
0.412	0
0.996	0
0.992	0
0.992	0
0.992	0
0.152	0
0.112	0
0.653333	0
0.992	0
0.6176	0
0.992	0
0.6176	0
0.6176	0
0.992	0
0.992	0
0.992	0
0.992	0
0.992	0
0.45	0
0.442667	0
0.988	0
0.988	0
0.988	0
0.45	0
0.988	0
0.45	0
0.45	0
0.45	0
0.988	0
0.192	0
0.988	0
0.9808	0
0.451556	0
0.192	0
0.347429	0
0.347429	0
0.347429	0
0.991	0
0.991	0
0.991	0
0.991	0
0.991	0
0.414	0
0.991	0
0.991	0
0.347429	0
0.347429	0
0.347429	0
0.347429	0
0.991	0
0.986	0
0.758	0
0.986	0
0.986	0
0.2304	0
0.667429	0
0.181333	0
0.986	0
0.04	0
0.986	0
0.2304	0
0.016	0
0.986	0
0.986	0
0.357333	0
0.986	0
0	0
0	0
1	0
1	0
1	0
1	0
1	0
1	0
1	0
1	0
1	0
1	0
1	0
1	0
0.0106667	0
1	0
0.266667	0
0.266667	0
0.939	0
0.912	0
0.464	0
0.912	0
0.464	0
0.912	0
0.912	0
0.464	0
0.464	0
0.464	0
0.912	0
0.912	0
0.266667	0
0.912	0
0.436	0
0.436	0
0.936	0
0.936	0
0.936	0
0.49	0
0.936	0
0.936	0
0.436	0
0.49	0
0.49	0
0.436	0
0.936	0
0.936	0
0.49	0
0.936	0
0.955	0
0.955	0
0.584	0
0.955	0
0.517333	0
0.128	0
0.955	0
0.955	0
0.955	0
0.584	0
0.448	0
0.584	0
0.955	0
0.955	0
0.717714	0
0.955	0
0.368	0
0.856	0
0.672	0
0.978	0
0.978	0
0.245333	0
0.978	0
0.245333	0
0.978	0
0.245333	0
0.886	0
0.978	0
0.9072	0
0.886	0
0.9072	0
0.978	0
0.0746667	0
0.42	0
0.999	0
0.999	0
0.361143	0
0.132	0
0.072	0
0.999	0
0.999	0
0.3552	0
0.072	0
0.999	0
0.999	0
0.999	0
0.361143	0
0.533333	0
0.325333	0
0.176	0
0.983	0
0.983	0
0.340571	0
0.983	0
0.325333	0
0.983	0
0.983	0
0.983	0
0.325333	0
0.272	0
0.983	0
0.983	0
0.176	0
0.983	0
0.986	0
0.986	0
0.325333	0
0.986	0
0.986	0
0.492	1
0.986	0
0.986	0
0.986	0
0.656	0
0.986	0
0.986	0
0.325333	0
0.325333	1
0.986	0
0.986	0
0.997	0
0.997	0
0.0426667	0
0.8992	0
0.997	0
0.997	0
0.997	0
0.997	0
0.688	0
0.997	0
0.997	0
0.997	0
0.0426667	0
0.0426667	0
0.997	0
0.997	0
0.961	0
0.961	0
0.7232	0
0.961	0
0.504	0
0.357333	0
0.779429	0
0.961	0
0.961	0
0.272	0
0.176	0
0.779429	0
0.961	0
0.961	0
0.848	0
0.961	0
0.963	0
0.963	0
0.352	0
0.963	0
0.963	0
0.504	0
0.963	0
0.501333	0
0.963	0
0.504	0
0.963	0
0.501333	0
0.963	0
0.963	0
0.504	0
0.963	0
0.982	0
0.877333	0
0.28	0
0.28	0
0.982	0
0.982	0
0.982	0
0.982	0
0.982	0
0.982	0
0.982	0
0.982	0
0.424	0
0.424	0
0.877333	0
0.982	0
0.401778	0
0.434909	0
0.401778	0
0.9824	0
0.401778	0
0.401778	0
0.401778	0
0.9824	0
0.401778	0
0.401778	0
0.336	0
0.401778	0
0.989	0
0.9824	0
0.4112	0
0.9824	0
0.922	0
0.922	0
0.922	0
0.922	0
0.922	0
0.922	0
0.922	0
0.032	0
0.922	0
0.048	0
0.922	0
0.922	0
0.922	0
0.922	0
0.922	0
0.922	0
0.819	0
0.819	0
0.819	0
0.048	0
0.819	0
0.819	0
0.819	0
0.819	0
0.819	0
0.819	0
0.819	0
0.819	0
0.819	0
0.819	0
0.819	0
0.819	0
0.988	0
0.988	0
0.404	0
0.404	1
0.404	0
0.404	0
0.988	0
0.988	0
0.988	0
0.704	0
0.822857	0
0.988	0
0.988	0
0.988	0
0.988	0
0.704	0
0.989	0
0.9504	0
0.989	0
0.989	0
0.192	0
0.032	0
0.192	0
0.989	0
0.989	0
0.989	0
0.989	0
0.312	0
0.989	0
0.989	0
0.989	0
0.989	0
0.951	0
0.951	0
0.613333	0
0.951	0
0.951	0
0.951	0
0.951	0
0.951	0
0.951	0
0.951	0
0.951	0
0.951	0
0.248	0
0.248	0
0.951	0
0.951	0
0.988	0
0.988	0
0.3136	0
0.988	0
0.988	0
0.3136	0
0.988	0
0.3136	0
0.988	0
0.3136	0
0.988	0
0.988	0
0.418667	0
0.3136	0
0.988	0
0.988	0
1	0
1	0
1	0
1	0
0	1
0	0
1	1
1	0
1	0
1	0
0	0
1	0
1	0
1	0
0.324	0
1	0
0.997	0
0.997	0
0.2208	0
0.2208	0
0.997	0
0.997	0
0.997	0
0.298667	0
0.997	0
0.2208	0
0.997	0
0.997	0
0.2208	0
0.2208	0
0.997	0
0.997	0
0.958933	0
0.822857	0
0.958933	0
0.934	0
0.958933	0
0.958933	0
0.604	0
0.112	0
0.958933	0
0.112	0
0.744	0
0.993	0
0.958933	0
0.958933	0
0.744	0
0.250667	0
0.328	0
0.432	0
0.925	0
0.925	0
0.925	0
0.925	0
0.470857	0
0.470857	0
0.470857	0
0.925	0
0.925	0
0.432	0
0.925	0
0.925	0
0.328	0
0.925	0
0.842	0
0.842	0
0.842	0
0.144	0
0.842	0
0.842	0
0.842	0
0.842	0
0.842	0
0.842	0
0.842	0
0.842	0
0.842	0
0.842	0
0.842	0
0.842	0
0.900267	0
0.706667	0
0.900267	0
0.900267	0
0.5824	0
0.192	0
0.5824	0
0.234667	0
0.900267	0
0.096	0
0.900267	0
0.991	0
0.900267	0
0.900267	0
0.866286	0
0.900267	0
0.900267	0
0.717333	0
0.900267	0
0.900267	0
0.6528	0
0.256	0
0.6528	0
0.256	0
0.900267	0
0.144	0
0.900267	0
0.985	0
0.900267	0
0.900267	0
0.838857	0
0.900267	0
0.9024	0
0.770667	0
0.9024	0
0.9024	0
0.576	0
0.197333	0
0.576	0
0.197333	0
0.9024	0
0.112	0
0.9024	0
0.992	0
0.9024	0
0.9024	0
0.841143	0
0.9024	0
0.621714	0
0.48	0
0.426667	0
0.998	0
0.998	0
0.998	0
0.998	0
0.224	1
0.998	0
0.998	0
0.998	0
0.998	0
0.998	0
0.509333	0
0.48	0
0.312	0
0.557714	0
0.437333	0
0.437333	0
0.999	0
0.999	0
0.999	0
0.999	0
0.192	1
0.999	0
0.999	0
0.999	0
0.999	0
0.999	0
0.437333	0
0.437333	0
0.224	0
0.564571	0
0.464	0
0.416	0
1	0
1	0
1	0
1	0
0.176	1
1	0
1	0
1	0
1	0
1	0
0.485333	0
0.464	0
0.28	0
0.571429	0
0.44	0
0.44	0
0.999	0
0.999	0
0.999	0
0.999	0
0.248	0
0.999	0
0.999	0
0.999	0
0.999	0
0.999	0
0.44	0
0.44	0
0.248	0
0.998	0
0.998	0
0.5504	0
0.998	0
0.998	0
0.998	0
0.614	0
0.2	0
0.998	0
0.2	0
0.614	0
0.998	0
0.548	0
0.548	0
0.614	0
0.998	0
0.418	0
0.497778	0
0.925	0
0.925	0
0.418	0
0.418	0
0.418	0
0.418	0
0.925	0
0.418	0
0.418	0
0.925	0
0.925	0
0.925	0
0.418	0
0.925	0
0.863	0
0.863	0
0.863	0
0.863	0
0.112	0
0.8	0
0.618667	0
0.863	0
0.863	0
0.863	0
0.618667	0
0.656	0
0.863	0
0.863	0
0.863	0
0.863	0
0.6	0
0.991	0
0.991	0
0.277333	0
0.256	0
0.991	0
0.277333	0
0.991	0
0.316	0
0.991	0
0.4608	0
0.991	0
0.991	0
0.991	0
0.991	0
0.991	0
1	0
1	0
0.0704	0
1	0
1	0
1	1
1	0
0.0704	0
0.0906667	0
0.0704	0
1	0
0.134857	0
0.064	0
0.0704	1
1	0
1	0
0.352	0
0.965	0
0.965	0
0.965	1
0.965	0
0.965	0
0.32	0
0.965	0
0.965	0
0.965	0
0.773333	0
0.965	0
0.965	0
0.965	0
0.965	0
0.965	0
0.998	0
0.998	0
0.308	0
0.308	0
0.482	0
0.336	0
0.998	0
0.308	0
0.998	0
0.308	0
0.998	0
0.998	0
0.336	0
0.336	0
0.998	0
0.998	0
0.951	0
0.951	0
0.951	0
0.951	0
0.9	0
0.951	0
0.128	0
0.951	0
0.951	0
0.9	0
0.9	0
0.951	0
0.951	0
0.951	0
0.951	0
0.951	1
0.272	0
0.304	0
0.969	0
0.969	0
0.969	0
0.969	0
0.969	0
0.969	0
0.969	0
0.969	0
0.348	0
0.4544	0
0.969	0
0.969	0
0.348	0
0.969	0
0.945	0
0.945	0
0.945	0
0.945	0
0.6816	0
0.945	0
0.144	0
0.945	0
0.945	0
0.456	0
0.48	0
0.6816	0
0.945	0
0.945	0
0.945	0
0.945	0
0.384	0
0.016	0
0.992	0
0.992	0
0.992	0
0.992	0
0.992	0
0.992	0
0.384	1
0.992	0
0.992	0
0.992	1
0.992	0
0.992	0
0.384	0
0.992	0
0.898	0
0.898	0
0.898	0
0.898	0
0.898	0
0.898	0
0.898	0
0.898	0
0.898	0
0.898	0
0.898	0
0.898	0
0.096	0
0.264	0
0.898	0
0.898	0
0.984	0
0.984	0
0.244	0
0.244	0
0.984	0
0.984	0
0.984	0
0.984	0
0.984	0
0.984	0
0.984	0
0.984	0
0.244	0
0.244	0
0.9216	0
0.984	0
0.917	0
0.917	0
0.917	0
0.917	0
0.709333	0
0.917	0
0.136	0
0.917	0
0.917	0
0.917	0
0.112	0
0.917	0
0.917	0
0.917	0
0.917	0
0.917	0
0.364	0
0.364	0
0.947	0
0.947	0
0.364	0
0.364	0
0.364	0
0.947	0
0.364	0
0.4048	0
0.364	0
0.4048	0
0.947	0
0.947	0
0.364	0
0.947	0
0.941867	0
0.941867	0
0.941867	0
0.941867	0
0.941867	0
0.165333	0
0.941867	0
0.165333	0
0.2336	1
0.165333	0
0.977	0
0.2336	0
0.941867	0
0.941867	0
0.941867	0
0.941867	0
0.915	0
0.446	0
0.915	0
0.915	0
0.446	0
0.446	0
0.32	0
0.915	0
0.446	0
0.446	0
0.32	0
0.915	0
0.915	0
0.915	0
0.446	0
0.915	0
0.988	0
0.576	0
0.498667	0
0.988	0
0.988	0
0.988	0
0.988	0
0.498667	0
0.988	0
0.498667	0
0.588	0
0.988	0
0.498667	0
0.498667	0
0.112	0
0.988	0
0.974	0
0.974	0
0.032	0
0.974	0
0.974	0
0.096	0
0.974	0
0.974	0
0.974	0
0.974	0
0.974	0
0.974	0
0.974	0
0.645333	1
0.974	0
0.974	0
0.992	0
0.410667	0
0.992	0
0.992	0
0.368	0
0.368	0
0.368	0
0.368	0
0.992	0
0.368	0
0.368	0
0.368	0
0.992	0
0.992	0
0.368	0
0.992	0
0.459429	0
0.949333	0
0.949333	0
0.949333	0
0.949333	0
0.459429	0
0.51	0
0.096	0
0.453333	0
0.459429	0
0.994	0
0.459429	0
0.949333	0
0.949333	0
0.949333	0
0.152	0
0.979	0
0.979	0
0.448	0
0.979	0
0.979	0
0.979	0
0.979	0
0.464	0
0.979	0
0.464	0
0.979	0
0.979	0
0.384	0
0.384	0
0.979	0
0.979	0
0.968533	0
0.968533	0
0.982	0
0.368	0
0.192	0
0.968533	0
0.696	0
0.968533	0
0.68	0
0.968533	0
0.696	0
0.528	0
0.968533	0
0.968533	0
0.968533	0
0.968533	0
0.975	0
0.975	0
0.975	0
0.336	0
0.336	0
0.660571	0
0.336	0
0.975	0
0.336	0
0.975	0
0.642667	0
0.336	0
0.975	0
0.975	0
0.975	0
0.975	0
0.376	0
0.376	0
0.942	0
0.942	0
0.376	0
0.376	0
0.376	0
0.942	0
0.942	0
0.376	0
0.376	0
0.376	0
0.942	0
0.942	0
0.581333	0
0.942	0
0.993	0
0.993	0
0.457143	0
0.993	0
0.457143	0
0.457143	0
0.457143	0
0.993	0
0.993	0
0.993	0
0.457143	0
0.457143	0
0.993	0
0.457143	0
0.993	0
0.993	0
0.875	0
0.875	0
0.875	0
0.875	0
0.352	0
0.352	0
0.352	0
0.875	0
0.5664	0
0.875	0
0.4	0
0.875	0
0.875	0
0.875	0
0.712	0
0.875	0
0.928	0
0.928	0
0.32	0
0.928	0
0.928	0
0.928	0
0.928	0
0.967	0
0.928	0
0.928	0
0.928	0
0.928	0
0.448	0
0.24	0
0.928	0
0.928	0
0.977067	0
0.977067	0
0.977067	0
0.977067	0
0.98	0
0.348	0
0.977067	0
0.266667	0
0.977067	0
0.266667	0
0.977067	0
0.266667	0
0.977067	0
0.977067	0
0.688	0
0.977067	0
0.999	0
0.411429	0
0.112	0
0.411429	0
0.999	0
0.999	0
0.999	0
0.999	0
0.999	0
0.999	0
0.999	0
0.411429	0
0.411429	0
0.411429	0
0.248	0
[truncated: 32,250 more rows]

## Sheet: Figure 1G
Cell type likely affected by disease (1=Yes, 0=No)	Literature co-appearance (1=Yes, 0=No)
0	1
1	0
1	0
0	1
1	0
1	0
1	1
0	1
1	0
1	0
1	0
1	0
1	0
1	0
1	0
0	1
1	0
1	0
1	1
1	1
0	1
0	1
0	1
1	1
1	0
1	0
0	1
0	1
1	0
1	0
0	1
0	1
1	0
0	1
0	1
1	0
1	0
1	0
0	1
0	1
1	0
1	0
1	0
1	0
1	0
1	0
0	1
1	1
1	0
0	1
1	0
1	0
0	1
0	1
0	1
0	1
1	0
1	1
0	1
0	1
1	0
0	1
0	1
1	0
0	1
1	0
1	0
0	1
1	0
1	0
0	1
1	0
1	0
1	0
1	0
1	0
1	0
1	0
1	0
1	0
1	0
1	0
1	0
0	1
1	0
1	0
0	1
1	0
1	1
1	1
0	1
0	1
1	0
0	1
1	0
1	0
0	1
0	1
0	1
0	1
1	1
1	1
0	1
1	0
1	0
1	0
0	1
1	0
1	0
1	0
0	1
1	0
1	0
1	0
0	1
1	0
1	0
1	0
1	0
0	1
0	1
1	0
1	1
0	1
1	0
1	0
1	0
1	1
1	0
1	0
1	0
1	0
1	0
1	0
1	0
1	0
0	1
1	0
1	0
1	0
1	0
1	0
1	1
0	1
1	1
0	1
1	1
0	1
1	1
0	1
0	1
1	0
0	1
1	0
1	0
0	1
0	1
1	0
1	0
1	0
1	0
1	0
1	0
1	0
1	0
1	0
1	0
1	0
1	0
1	0
1	0
1	0
1	0
1	0
1	0
1	0
1	0
1	0
1	0
0	1
0	1
0	1
1	0
0	1
0	1
0	1
0	1
0	1
0	1
1	0
0	1
1	1
0	1
0	1
0	1
0	1
0	1
1	0
0	1
0	1
0	1
1	0
1	0
1	1
0	1
0	1
1	1
0	1
0	1
0	1
0	1
0	1
0	1
1	0
1	0
1	0
1	0
0	1
0	1
1	0
1	1
0	1
0	1
1	0
0	1
1	0
1	0
1	0
1	0
1	0
0	1
0	1
0	1
0	1
1	1
1	1
1	1
1	1
1	0
1	0
1	1
0	1
0	1
0	1
1	1
0	1
0	1
1	0
1	1
1	0
0	1
1	0
0	1
1	0
1	0
1	0
1	0
1	0
1	0
0	1
0	1
1	0
1	0
1	0
1	0
0	1
1	1
1	1
0	1
0	1
0	1
1	0
1	0
1	0
0	1
0	1
0	1
0	1
0	1
1	0
0	1
0	1
0	1
0	1
0	1
1	0
1	0
1	0
0	1
0	1
0	1
1	0
1	0
1	0
1	0
0	1
0	1
1	0
1	0
0	1
1	0
1	0
0	1
0	1
0	1
0	1
0	1
0	1
0	1
1	0
1	0
1	0
0	1
1	0
1	0
1	0
1	0
1	0
1	0
1	0
1	1
1	0
1	0
1	0
1	0
0	1
0	1
1	0
0	1
1	0
0	1
1	0
1	0
1	0
1	0
1	0
1	0
1	0
0	1
0	1
1	0
1	0
1	0
1	0
1	0
0	1
1	0
0	1
1	0
1	1
1	0
1	0
1	0
1	0
1	0
1	0
1	0
1	0
0	1
1	0
1	0
1	0
1	0
1	0
1	0
1	0
1	1
1	0
1	0
0	1
1	0
1	0
1	0
1	1
0	1
1	0
1	0
1	0
0	1
1	0
0	1
1	0
0	1
1	0
0	1
1	0
1	0
1	0
0	1
1	0
0	1
1	1
1	1
1	0
1	0
0	1
1	0
1	0
1	0
1	0
1	0
1	0
1	0
1	0
1	0
0	1
0	1
1	0
1	0
1	0
1	0
1	0
1	0
1	0
1	0
1	0
1	0
0	1
0	1
1	0
1	0
1	0
1	0
1	0
1	0
1	0
1	0
1	0
1	0
1	0
1	0
1	0
0	1
1	0
1	0
1	0
0	1
1	0
0	1
1	0
1	0
1	0
1	0
1	0
1	0
0	1
1	0
1	0
1	0
1	0
1	0
1	0
1	0
0	1
1	0
1	0
1	0
1	0
1	0
1	0
1	0
0	1
1	0
1	0
0	1
0	1
0	1
1	0
1	0
1	0
1	0
1	0
1	0
1	0
1	0
1	0
1	0
1	0
1	0
1	0
1	0
1	0
1	0
1	0
1	0
1	0
1	0
1	0
1	0
1	0
1	0
1	0
1	0
1	0
1	0
1	0
1	0
1	0
1	0
1	0
1	0
1	0
1	0
1	0
1	0
1	0
1	0
1	0
1	0
0	1
1	0
1	0
1	0
1	0
1	0
1	0
1	0
1	0
1	0
1	0
1	0
1	0
1	0
1	0
1	0
0	1
1	0
0	1
1	0
0	1
1	0
1	0
1	0
1	0
1	0
1	0
1	0
0	1
1	0
1	0
1	0
1	0
1	0
1	0
1	0
1	0
1	0
1	0
1	0
1	0
1	0
1	0
1	0
1	0
1	0
1	0
1	0
1	0
1	0
1	0
1	0
1	0
1	0
1	0
1	0
0	1
1	0
1	0
1	0
1	0
1	0
1	0
1	1
1	0
1	0
1	0
1	0
0	1
1	0
0	1
1	0
1	0
1	0
1	1
1	1
1	0
0	1
0	1
1	0
1	0
1	0
1	0
1	0
1	0
1	0
0	1
1	0
1	0
1	0
1	0
1	0
1	0
1	0
1	0
1	0
0	1
1	0
1	0
1	0
1	0
1	0
0	1
0	1
0	1
0	1
1	1
1	0
1	0
1	0
1	0
0	1
1	0
1	0
1	0
1	0
0	1
0	1
1	0
1	0
1	0
1	0
1	1
1	0
1	0
1	0
1	0
1	0
0	1
1	0
0	1
0	1
1	0
1	0
1	0
1	0
1	0
1	0
0	1
0	1
1	1
0	1
1	0
1	0
0	1
1	0
1	0
1	0
1	0
1	0
0	1
1	0
0	1
1	0
1	0
1	0
1	0
1	0
1	0
0	1
1	0
0	1
1	0
1	0
1	0
0	1
1	0
0	1
