# Supplementary material for: Affected cell types for hundreds of Mendelian diseases revealed by analysis of human and mouse single-cell data
Source: eLife. 2024 Jan 10;13:e84613. doi: 10.7554/eLife.84613 (PMC10830129; doi:10.7554/eLife.84613)
Supplement: Figure 2—figure supplement 1—source data 1. [file elife-84613-fig2-figsupp1-data1.xlsx]

## Sheet: Figure 2–figure supplement 1
	Single-gene diseases	Multiple-genes diseases
Recapitulated	37	83
Not recapitulated	25	46
