# Supplementary material for: Affected cell types for hundreds of Mendelian diseases revealed by analysis of human and mouse single-cell data
Source: eLife. 2024 Jan 10;13:e84613. doi: 10.7554/eLife.84613 (PMC10830129; doi:10.7554/eLife.84613)
Supplement: Figure 2—source data 1. [file elife-84613-fig2-data1.xlsx]

## Sheet: Figure 2A
Tissue	Human cell types	Mouse cell types (Tabula Muris)	Mouse cell types (This study)
Lung	38	13	14
Spleen	24	5	15
Trachea	20	5	19
Skeletal muscle	19	6	19
Bone marrow	16	14	20
Tongue	12	3	10

## Sheet: Figure 2B
PrEDiCT scores
-0.7831
-0.674212
-0.842401
2.5503
1.49788
0.431651
-0.400071
0.00792503
0.881506
0.229317
-0.494923
-0.631681
-0.672416
-0.631247
-0.697142
-0.560476
-0.778603
1.97033
0.264818
-0.667461
4.24415
-0.23514
-0.23514
-0.23514
-0.23514
-0.23514
-0.23514
-0.23514
-0.21506
-0.0317172
-0.23514
-0.23514
-0.23514
-0.23514
-0.23514
-0.23514
-0.23514
-0.23514
-0.23514
-0.23514
-0.371168
-1.5734
-1.53299
0.0692295
0.675379
0.646704
-0.159706
0.165783
0.850001
1.08759
0.325051
1.72679
1.127
0.077049
0.17313
0.443482
-0.0486995
-1.03353
-1.40522
-1.54781
-0.7247
-1.23029
-1.26534
0.352681
1.2495
1.55801
-0.76523
-0.249699
0.378461
1.92203
0.0702684
1.28599
0.11012
-0.14633
0.326984
0.605437
0.21385
-1.16107
-1.26534
-1.26534
-1.09345
-0.92133
-1.02428
0.39815
-0.920217
-0.934741
-0.947117
0.752817
-0.475916
-0.75944
-0.140395
0.316114
-0.541248
0.848349
0.153125
-0.13399
0.196175
0.974704
1.59936
2.65332
-0.711827
-0.635494
-0.552784
-0.065434
-0.721556
-0.721556
-0.701699
0.82197
-0.626098
-0.603734
-0.320201
-0.413044
-0.461116
2.35585
-0.209996
1.01892
1.19944
-0.64007
-0.396906
2.38534
1.62134
-1.52332
-0.870558
-0.387127
0.278438
-0.0272759
0.376523
-0.0312685
-0.0951626
0.260754
-0.688359
-0.0182343
-0.307519
0.602947
-0.0543035
0.417988
0.986705
-0.2495
-0.630463
0.338397
-1.03523
-1.35266
-1.43351
-1.18408
1.81872
1.0022
0.068196
0.686828
0.301532
1.02949
0.591175
-0.820302
-0.00845699
0.841521
0.712734
0.907118
0.821436
-0.772772
-1.14114
-1.03281
-0.926097
-1.07281
-0.987922
-1.1221
0.483452
-0.296241
-0.175016
-0.296241
-0.282929
-0.035155
-0.101701
-0.296241
-0.296241
0.166678
1.26823
0.476975
0.423953
-0.0761139
-0.296241
-0.355106
-0.421327
-0.450425
-0.443652
-0.429242
-0.16438
-0.280962
-0.354477
-0.278072
-0.353498
0.461691
-0.309494
-0.236669
-0.250281
-0.26215
-0.124084
-0.316772
-0.277648
-0.203886
-0.251554
-0.292064
0.496523
3.43961
2.1605
-0.34172
-0.363648
-0.36602
-0.368739
-0.354087
-0.368842
-0.355145
-0.349351
-0.321425
-0.352642
-0.356603
-0.363038
-0.367215
-0.369065
-0.365754
-0.362642
-0.370697
-0.964352
-0.87855
-0.907385
-0.957036
-0.922159
-0.852266
-0.918779
-0.831646
0.695123
-0.0708407
-0.173267
-0.459273
-0.668168
1.68001
0.64294
1.35108
1.70443
0.490496
0.318465
1.72119
-1.21356
-1.11085
-1.21202
-0.0716407
-0.287023
-0.671493
-0.801364
-0.730938
-0.488262
0.463734
0.490795
0.24723
0.154784
1.61152
1.31318
0.708765
1.18287
-0.344779
-0.304362
-0.159927
-1.62436
-1.70692
-1.8442
-0.675498
-0.377622
-0.492154
-0.0422611
0.540771
0.530858
-0.15716
-0.199692
-0.55808
-0.295591
0.345909
0.967257
1.19338
1.68304
1.26061
1.05095
0.400758
-0.148023
-1.30356
-0.928965
-0.0108252
2.02257
1.5446
0.960496
0.00429748
0.150612
1.68682
-0.0866009
0.570418
0.357024
-0.66592
0.0284087
0.19496
-0.577465
-1.06567
-1.3381
-1.39508
-0.68922
-0.705962
-0.728827
0.073245
-0.495312
-0.640004
-0.674275
-0.315346
-0.0464367
-0.308404
-0.655903
-0.603662
0.420735
1.27659
0.0160715
0.471501
0.385071
-0.22617
-0.315346
-0.321562
-0.106373
-0.463173
-0.521004
-0.521004
-0.0268748
-0.38917
-0.463584
0.0581852
1.87588
3.55502
-0.478477
-0.467182
-0.521004
-0.477905
0.212151
-0.333254
-0.479284
0.254398
-0.186342
-0.521004
-1.06127
-1.09753
-1.18387
-0.00865458
2.81228
1.03643
0.720347
-1.06096
-1.00206
0.332664
0.548277
-0.428507
0.933047
-0.206121
0.221003
-0.477216
-0.372854
-0.825297
0.110932
1.00936
-0.798043
-0.809312
-0.684642
-0.939722
-0.587018
-0.445473
-0.629447
0.265825
-0.729752
-0.546246
0.044483
-0.239116
0.977793
0.583753
0.355296
-0.496762
-0.548513
0.250486
2.34582
2.63059
-0.261778
-0.235661
-0.24283
-0.236434
-0.264215
-0.269286
-0.271186
-0.256818
4.22369
-0.247904
-0.266938
-0.268163
-0.264028
-0.262808
-0.27156
0.210453
-0.181439
-0.12288
-0.262459
-0.247751
-0.13255
-1.78187
-1.65534
0.276782
0.723844
1.14478
0.898837
-9.25091e-05
-0.216335
0.440641
0.301982
-0.161055
0.351895
-0.0747443
0.417702
0.0853373
0.269227
-0.374674
-0.726794
-0.909625
-0.772574
-0.854067
-0.200903
-0.0677563
-0.0908999
0.0964962
-0.395695
-0.564155
-0.666561
-0.611757
-0.359072
-0.997229
1.68596
1.03167
0.323454
-0.646239
-0.411572
-0.38162
0.734344
3.14818
2.22375
0.524468
3.39943
-0.351341
-0.369016
-0.361777
-0.366259
-0.357117
-0.362688
-0.358017
-0.362531
-0.350646
-0.372814
-0.362837
-0.358987
-0.367042
-0.362065
-0.360278
-0.367569
-0.356669
2.52437
-1.28082
-0.466675
-1.08204
-0.595339
0.297038
2.3218
0.292564
-0.346559
-0.635338
-0.812609
-0.713041
-0.710319
-0.476028
0.209549
0.284957
0.979204
0.275416
-0.249613
0.183476
-0.929377
0.135271
-0.904561
0.432374
-0.186599
-0.558739
-0.775072
3.06977
-0.187115
-0.0724516
0.830111
-0.35826
-0.210666
0.468014
1.51908
0.466724
0.268543
-0.935325
-1.00407
-1.06765
-0.415595
-0.835314
-0.810295
3.81886
-0.635285
-0.207739
-0.306603
0.10106
0.302438
0.055613
0.756197
-0.69579
-0.0995403
0.00113317
0.0343385
0.500147
0.0906371
-0.487908
-0.57705
-0.589306
-1.27795
-1.47897
-1.41008
1.92825
0.271057
-0.262966
-0.0386077
-0.322915
-1.1347
0.14119
1.312
0.739227
1.02365
0.672938
1.43896
-0.296764
0.577411
-0.967386
-0.846203
-0.068151
-1.27795
-1.47897
-1.41008
1.92825
0.271057
-0.262966
-0.0386077
-0.322915
-1.1347
0.14119
1.312
0.739227
1.02365
0.672938
1.43896
-0.296764
0.577411
-0.967386
-0.846203
-0.068151
2.76194
-1.91535
1.58426
-0.283491
0.100179
-0.248979
0.852232
0.458398
0.376465
0.365631
-0.130216
-1.01077
-0.686286
-0.923772
-0.11586
0.306245
0.105418
-0.220749
-1.10794
-0.267355
-0.620321
-0.525538
-0.614488
-0.540626
-0.503575
-0.493423
-0.527603
-0.680922
-0.246963
0.284474
-0.433715
-0.463498
-0.541425
1.3036
0.254254
1.16967
1.17738
-0.523312
-0.540605
-0.52139
1.6432
2.01457
2.89661
-0.384175
-0.397094
-0.391402
-0.39619
-0.386729
-0.377822
-0.356278
-0.39595
-0.362499
-0.378389
-0.388159
-0.386006
-0.393874
-0.390023
-0.407725
-0.428215
-0.427314
3.67075
-0.704611
0.936201
-0.195188
-0.19822
0.160666
0.964302
-0.0329136
-0.775718
-0.611744
-0.191172
-0.883732
-0.395316
0.0276241
-0.375348
-0.507261
0.317926
-0.0772462
-0.677144
-0.451856
1.99119
0.302205
2.39757
-0.369419
-0.331781
-0.346795
-0.360168
-0.332398
-0.30371
-0.283225
-0.296844
-0.361098
-0.394514
-0.390971
-0.28968
-0.330299
-0.401948
-0.442618
-0.463029
-0.470097
3.41698
0.0181627
2.31793
-0.348414
-0.348414
-0.348414
-0.348414
-0.348414
-0.329138
-0.312569
-0.310134
-0.297561
-0.348414
-0.344778
-0.348414
-0.342428
-0.337691
-0.343039
-0.348414
-0.348414
2.4793
-0.198994
3.31248
-0.336071
-0.336071
-0.336071
-0.327454
-0.336071
-0.32543
-0.306112
-0.330647
-0.323398
-0.336071
-0.322821
-0.331906
-0.327176
-0.326005
-0.325635
-0.329786
-0.336071
2.22375
0.524468
3.39943
-0.351341
-0.369016
-0.361777
-0.366259
-0.357117
-0.362688
-0.358017
-0.362531
-0.350646
-0.372814
-0.362837
-0.358987
-0.367042
-0.362065
-0.360278
-0.367569
-0.356669
-0.565623
-1.97558
-2.13938
0.294203
2.26357
0.441097
0.809993
-1.38224
0.140268
0.10436
-0.501854
1.11748
0.315039
-0.296458
0.606203
0.220154
0.176612
0.222462
0.110229
0.0394663
0.0227641
-0.398837
-0.491813
-0.564542
1.52013
-0.123395
-0.469383
-0.443473
-0.311237
0.553609
-0.222598
-0.545863
-0.515768
-0.00899888
0.522702
0.00512995
-0.168158
-0.519924
0.664622
1.49504
-0.0709579
-0.492608
-0.263397
-0.542487
-0.348284
-0.36938
-0.364401
1.71415
-0.391262
2.40757
0.467953
-0.129621
-0.347817
-0.1927
0.335509
-0.215395
-0.179045
-0.365251
-0.382525
-0.270053
-0.349015
-1.3816
-0.996217
-0.114904
-0.209311
0.424174
0.645301
-0.40213
0.188674
0.404393
0.312747
0.181939
-0.127361
0.27602
0.637409
0.190926
0.170173
-0.513792
-0.739365
-0.396902
-0.711827
-0.635494
-0.552784
-0.065434
-0.721556
-0.721556
-0.701699
0.82197
-0.626098
-0.603734
-0.320201
-0.413044
-0.461116
2.35585
-0.209996
1.01892
1.19944
-0.64007
-0.396906
2.38534
-0.746396
-0.698419
-0.647695
-0.712166
0.358313
-0.449889
0.0189927
-0.189765
-0.348289
0.0413232
1.96749
-0.431947
-0.173734
0.255336
2.17485
0.0928771
0.0548787
-0.0563983
-0.169804
-0.339566
-0.821195
-1.15582
-1.02141
-0.30617
-0.259814
-0.358125
0.691873
0.641726
-0.583345
-0.786538
-0.582912
-0.961382
-0.286628
-0.491544
-0.140455
0.679521
2.26346
0.0933971
1.03089
2.35447
0.0445781
-1.29651
-1.1537
-0.983511
1.86673
1.31472
1.03671
-0.411584
-0.295136
1.28748
1.50536
0.883203
0.396246
-0.746115
0.14427
-0.330505
-0.81079
-0.405773
-1.10167
-0.943992
-0.41363
-1.25753
-0.963685
0.569883
0.0508766
0.332641
-0.0763916
-0.175573
0.45258
0.281028
0.196182
-0.307066
-0.123002
-0.0535528
0.257715
0.12519
-0.10862
-0.687559
-0.824321
-0.672235
-0.938635
-1.5711
-1.28954
-0.202043
0.156945
-0.393563
0.416641
0.527891
-0.498099
0.278374
1.08489
-0.180271
-0.0926223
1.01512
0.998694
0.455239
0.179266
-0.639157
-0.702549
-0.843706
-1.2284
-1.21064
-1.30927
0.844493
-0.378581
-1.02703
-1.08763
0.938159
-0.728496
-0.599256
0.299194
0.140994
-0.109815
1.51212
0.118401
0.47346
0.396012
-0.452854
1.14428
2.26486
3.5244
-0.541911
-0.057257
-0.210893
0.900699
0.382961
0.752513
-0.420356
-0.196693
-0.0336591
-0.584476
-0.256389
-0.516188
-0.182108
-0.33704
-0.154332
-0.219059
-0.59537
-0.627419
-0.627419
-1.17372
-0.994633
-1.4045
3.1237
0.323524
-0.34657
-0.101151
0.489505
0.322702
0.148116
1.50123
-0.284452
-0.285135
0.183467
0.0305627
0.62842
-0.155273
-0.678671
-0.877442
-0.449675
-0.742865
-1.13907
-0.997058
-0.0171923
-0.577736
0.984524
0.0244609
-0.230489
0.532095
1.77764
2.23918
1.41929
0.749384
-0.379157
-0.0915346
0.172176
-0.820039
-0.71212
-1.05243
-1.13907
-0.798542
-0.478144
-0.775419
1.21883
-0.26755
-0.686507
-0.824517
2.37868
-0.360102
-0.133452
0.0231505
-0.700488
-0.777743
2.34157
1.23383
-0.16614
0.246447
-0.683941
-0.551565
-0.238405
-0.503377
-1.11971
-0.380928
-0.203528
1.30377
0.229063
1.57617
-0.550339
-0.673102
-0.0902702
0.72936
-0.279236
0.174636
0.0387536
0.818242
-0.51673
-0.14002
-0.718266
-0.925644
-0.550339
-0.484717
-0.833783
-0.734845
-0.250597
-0.103898
-0.209314
-0.218789
-0.231791
-0.246067
-0.230201
-0.151832
0.482166
-0.0535289
-0.234879
0.135367
-0.0983591
-0.237915
-0.306029
-0.328842
-0.248626
-0.737368
-0.605616
-0.737368
0.950876
-0.13715
-0.737368
-0.737368
-0.737368
0.321646
0.508819
-0.216809
0.380281
-0.279176
3.48624
0.72854
0.0490591
0.534164
-0.609204
-0.687455
-0.737368
3.10081
-0.789079
-0.656906
-0.802734
-0.878731
0.736048
1.21507
0.860661
0.140189
0.588927
-0.720196
-0.518052
-0.756767
-0.722765
0.663931
0.0620392
0.236559
-0.0878969
-0.868163
-0.802937
-0.88523
-0.941076
-0.916672
-0.189489
0.903601
-0.786318
-0.901271
-0.698373
0.548028
-0.352546
0.908931
-0.100548
-0.300827
1.53531
0.397288
0.478011
0.746285
0.178731
-0.0193676
0.395537
-0.0480587
-1.18542
-1.1526
0.959959
-0.344688
-0.0933027
-0.131141
0.302298
0.541056
-0.14425
0.35863
-0.454106
-0.265816
-0.43388
0.287237
0.604814
1.00374
-0.325149
-0.962469
-0.947614
-0.152858
-1.03649
-0.710259
-0.568786
0.591611
0.87911
2.17086
0.566303
0.479195
0.821408
-0.649986
-0.246112
-0.702212
-0.35368
0.408426
0.109712
0.178685
-0.705978
-1.07671
-1.1397
-1.13483
-1.11435
-1.07998
-0.828418
-0.903486
-0.937302
-0.939336
1.09008
-0.192348
-0.597556
-0.183113
0.894475
-0.321094
1.15348
-0.17669
0.69405
0.938918
0.312966
0.896655
2.42788
-1.01035
-1.05122
-0.810962
0.739383
-0.389202
-0.999231
-1.01566
-0.53175
0.920738
-0.990956
1.0742
2.27344
1.28986
-0.167425
-0.429207
-0.501264
-0.776388
0.386179
0.683074
1.30674
-0.522617
-0.959439
-0.930822
0.042071
0.561742
-0.341605
-0.53199
2.50533
0.763483
1.01691
-0.275812
-0.765987
-0.297508
0.131795
-0.0678661
0.635247
0.668984
0.0598711
-0.714395
-0.977393
0.713373
0.363979
3.31523
0.542451
-0.161472
0.0416131
0.788569
-0.402851
-0.319072
-0.158378
0.316162
-0.767043
-0.644287
-0.445005
-0.322157
-0.567648
0.911733
-0.930782
-0.888965
-1.38545
0.2206
-2.01949
0.0691281
-1.6959
0.222089
0.000124463
2.19185
-0.246607
-0.785463
0.134867
0.463706
-0.983673
0.527369
0.262646
1.22365
-0.278771
1.66738
0.0131642
-0.305205
-0.681464
-0.859652
-1.2532
-1.2532
1.14505
1.17786
-0.279847
-0.205256
0.470891
0.784076
2.33353
0.46237
0.0313763
0.937152
-0.650177
0.577749
0.275283
-0.22897
-0.994689
-1.21714
-1.2532
-0.42575
-0.709697
-0.709697
0.947552
3.70414
-0.0284396
-0.224004
-0.709697
-0.510258
-0.507379
-0.350472
-0.606814
-0.00389649
0.767037
-0.163817
0.491391
0.345003
-0.466731
-0.213838
-0.624628
-0.207313
3.78172
1.72927
-0.304678
-0.3189
-0.309424
-0.328373
-0.270093
-0.331267
-0.291577
-0.294871
-0.2549
-0.279892
-0.3166
-0.330721
-0.324109
-0.331428
-0.338281
-0.334856
-0.343704
1.67476
-1.15321
-0.688555
-0.301082
-0.301082
0.846641
1.60015
0.277996
-0.0955562
-0.156515
-0.297058
-0.301082
-0.279188
-0.623375
0.634832
0.0403096
0.437151
-0.289671
-1.06526
-1.06244
0.0104209
-1.18915
-1.10554
0.383725
0.0306338
1.40584
0.338541
-0.0488677
1.17158
1.06715
-0.0279068
0.115443
-0.200895
-0.432457
0.15941
0.198789
0.0728284
-0.68736
-1.14758
-1.36253
1.34081
-0.951472
-0.710475
-0.104176
-0.495312
-0.585364
-0.530372
-0.576194
-0.255316
-0.0180105
0.0234766
-0.512013
-0.411086
1.49479
0.404518
0.471501
0.598153
-0.695753
-0.447436
-0.372073
0.265968
-0.387329
-0.295225
0.60193
-0.289712
-0.32964
0.00638443
-0.0156566
-0.52364
-0.394668
-0.479343
0.0437624
4.01191
-0.471963
-0.528983
-0.515424
-0.537457
-0.494226
0.0596307
0.273682
-1.1769
-1.14066
-1.06202
-0.676503
-0.334519
-0.971887
-1.01835
0.638707
-0.692865
0.641955
0.272316
0.696961
0.266761
0.949775
0.979171
1.89409
2.1362
-0.601002
-0.331372
-0.469854
0.9878
-1.03768
-0.800366
-0.465402
-0.494668
1.00427
1.54091
-0.155878
0.135948
0.310176
-0.60352
-0.672838
-0.623557
-0.609549
0.355001
0.282197
0.33929
0.17364
-0.838344
-0.919264
-0.870153
-0.774856
-0.881573
-0.183118
-0.357855
-0.737523
-0.754251
-0.600985
-0.263134
-0.208635
1.9855
-0.638724
-0.516531
2.26704
1.39695
1.06938
1.30687
-0.53215
-0.464795
-0.241444
-1.36463
-1.52459
-1.71184
0.806673
1.25759
-0.676738
-0.426272
0.0761917
-0.388673
-0.219285
0.773916
-0.793735
0.747177
1.58107
0.918343
1.2281
1.10891
-0.777324
-0.576302
-0.0385751
-1.34049
-1.32184
-1.54441
0.389603
1.23349
1.311
-0.0223359
0.749846
1.07112
1.77364
0.663636
0.202366
-0.232247
-0.203986
0.44512
0.0829773
0.104393
-0.705677
-1.37425
-1.28194
2.53698
-0.766203
0.224841
-0.721206
0.833444
0.575409
2.64508
0.480342
-0.458644
-0.262695
-0.37185
-0.334689
-0.377163
-0.52021
-0.380249
-0.402771
-0.434554
-0.707439
-0.772964
-0.785461
-0.886228
-0.893487
-0.959585
2.05312
0.842753
-0.129726
-0.225641
2.96962
0.33643
0.429613
-0.160804
-0.376293
-0.503384
-0.143513
-0.0147926
0.181125
-0.148273
-0.689719
-0.82623
-0.854983
-0.886228
-0.893487
-0.959585
2.05312
0.842753
-0.129726
-0.225641
2.96962
0.33643
0.429613
-0.160804
-0.376293
-0.503384
-0.143513
-0.0147926
0.181125
-0.148273
-0.689719
-0.82623
-0.854983
-0.886228
-0.893487
-0.959585
2.05312
0.842753
-0.129726
-0.225641
2.96962
0.33643
0.429613
-0.160804
-0.376293
-0.503384
-0.143513
-0.0147926
0.181125
-0.148273
-0.689719
-0.82623
-0.854983
-1.14718
-1.05901
-1.30425
3.03383
0.400535
-0.680592
-0.330408
1.32043
-0.122269
-0.325634
0.368771
-0.0652385
-0.547349
0.357122
0.810497
0.235007
0.768652
-0.75212
-0.765362
-0.195434
-1.14718
-1.05901
-1.30425
3.03383
0.400535
-0.680592
-0.330408
1.32043
-0.122269
-0.325634
0.368771
-0.0652385
-0.547349
0.357122
0.810497
0.235007
0.768652
-0.75212
-0.765362
-0.195434
-1.14718
-1.05901
-1.30425
3.03383
0.400535
-0.680592
-0.330408
1.32043
-0.122269
-0.325634
0.368771
-0.0652385
-0.547349
0.357122
0.810497
0.235007
0.768652
-0.75212
-0.765362
-0.195434
-1.14718
-1.05901
-1.30425
3.03383
0.400535
-0.680592
-0.330408
1.32043
-0.122269
-0.325634
0.368771
-0.0652385
-0.547349
0.357122
0.810497
0.235007
0.768652
-0.75212
-0.765362
-0.195434
-0.397893
-0.191363
0.855443
-0.957556
-0.957556
-0.936175
-0.957556
0.218386
0.00969135
2.49358
-0.957556
-0.745407
-0.957556
1.75586
0.558049
0.282519
0.832065
-0.575003
-0.426418
1.05444
0.258462
-1.03383
-0.613789
-0.0567395
-0.169497
-0.196866
-0.26374
3.61006
0.315015
0.0441566
-0.324962
-0.0136308
-1.03383
0.231836
0.282588
0.665199
0.704998
-0.690311
-0.954136
-0.760977
-0.896437
-1.48471
-1.61519
-0.850745
0.0849768
-0.41132
1.09189
0.378676
1.22363
0.401771
1.35437
0.203092
0.803649
0.364997
-0.419373
0.833055
1.75496
-0.566317
-1.00275
-1.24823
-0.359703
-0.325594
-0.335295
-0.362838
3.86104
0.727554
1.13057
-0.362838
-0.357239
-0.142962
-0.309203
-0.35523
-0.326214
-0.34974
-0.339069
-0.35286
-0.362838
-0.356218
-0.358487
-0.362838
-0.908796
-0.78622
-0.849931
-0.40401
-0.80869
-0.757774
-0.784929
-0.0132518
-0.164578
-0.650232
0.11801
-0.759554
-0.060648
1.6654
-0.0325574
0.261928
0.445173
1.38924
1.96727
1.81743
-0.686544
-0.570779
-0.592991
-0.451455
-0.535089
-0.451455
-0.380152
-0.687701
-0.451455
-0.180384
-0.451455
-0.460578
-0.451455
1.34031
0.645667
0.265825
0.882508
-0.419551
-0.431188
-0.451455
3.29893
-1.01424
1.35306
-0.716103
0.506133
-0.730702
-0.965983
0.268012
0.168354
1.13611
-0.501841
0.0757967
-0.719485
-0.295573
-0.377869
-0.215344
-0.619428
-0.0906123
-0.15586
-0.40336
-0.54243
-1.04865
-1.05069
0.903371
-0.231725
0.610684
0.230119
-0.0307902
-0.375945
0.189461
1.49719
-0.0014598
0.547059
-0.363656
0.770865
-0.341106
-0.311859
-0.536392
-0.396777
-0.657062
-0.481294
-0.481294
-0.481294
2.58449
0.39509
2.49273
1.64525
-0.314081
-0.481294
-0.371116
-0.481294
-0.481294
-0.251211
-0.481294
-0.405631
-0.481294
-0.481294
-0.481294
-0.481294
-0.481294
-0.535512
-0.746668
-0.746668
-0.746668
-0.209704
0.710771
-0.652499
0.167002
0.753544
3.55388
-0.191421
0.493029
-0.309277
-0.449263
0.70351
-0.0415271
0.426075
-0.685262
-0.746668
-0.746668
-0.684792
-0.846425
-1.16955
-1.16955
2.49277
1.05524
2.08695
-0.243091
0.422369
0.405997
0.0331313
-1.07739
0.143649
0.520741
-0.0876794
-0.095958
0.12522
-0.198404
-0.874008
-0.839233
-0.570632
-1.32304
-1.35506
-0.296234
-1.13013
-0.14034
-0.33829
-0.452473
-0.424709
-0.101996
1.02031
-0.147974
0.451797
1.57423
2.47052
0.836107
1.3287
-0.382766
-0.837077
-0.180927
-0.874462
-1.13403
-1.02562
-0.769079
1.78122
0.879041
1.6937
-0.561325
0.65601
1.09367
0.40832
0.287962
-0.345127
-0.574197
0.915351
0.491756
0.666781
-1.10379
-1.14656
-1.33962
-0.485446
-0.724152
-0.804895
-0.639972
1.1284
0.505327
0.766534
-0.318902
0.640748
-0.119832
-0.285419
-0.398599
-0.276749
-0.322425
-0.152154
-0.184941
-0.166336
1.49803
0.577605
-0.236821
0.693749
-1.84205
-1.60905
-1.48275
-0.380753
0.314261
0.496537
-0.912157
0.359879
-0.382563
1.48731
-0.535778
-0.0405437
1.7889
0.703824
0.948627
0.954449
-0.610236
-0.399538
0.447882
-1.03095
-0.878791
-0.985392
0.713731
-0.666897
-0.788674
-0.866623
3.0165
0.37065
-0.401243
-0.0426844
-0.578839
-0.482864
1.35261
0.406678
0.667221
0.942063
-0.446515
-0.554336
0.254346
-0.61911
-0.660103
-0.660103
-0.310445
-0.660103
-0.649213
-0.618097
-0.660103
0.72114
-0.391051
-0.465193
-0.660103
-0.660103
1.66308
0.644081
1.82878
2.61588
0.54155
-0.340685
[truncated: 22,639 more rows]

## Sheet: Figure 2C
Gene symbol	Mouse cell type	Preferential expression	Percentage of cells expressing
Zmynd10	ciliated.epithelial.cell	3.47415	95.2381
Ttc12	ciliated.epithelial.cell	3.44173	71.4286
Spag1	ciliated.epithelial.cell	3.4147	19.0476
Rsph9	ciliated.epithelial.cell	3.431	100
Rsph4a	ciliated.epithelial.cell	3.46204	85.7143
Rsph3b	ciliated.epithelial.cell	3.4174	66.6667
Rsph3a	ciliated.epithelial.cell	3.38952	57.1429
Rsph1	ciliated.epithelial.cell	3.47385	100
Lrrc56	ciliated.epithelial.cell	3.46436	71.4286
Lrrc6	ciliated.epithelial.cell	3.4744	76.1905
Hydin	ciliated.epithelial.cell	3.47367	85.7143
Gas8	ciliated.epithelial.cell	3.4568	95.2381
Gas2l2	ciliated.epithelial.cell	3.4744	38.0952
Foxj1	ciliated.epithelial.cell	3.47419	95.2381
Dnajb13	ciliated.epithelial.cell	3.42173	71.4286
Ccdc65	ciliated.epithelial.cell	3.47412	80.9524
Ccdc40	ciliated.epithelial.cell	3.47225	76.1905
Ccdc39	ciliated.epithelial.cell	3.47372	80.9524
Ccdc103	ciliated.epithelial.cell	3.46847	38.0952
Zmynd10	pulmonary.ionocyte..type.II.pneumocyte	-0.25644	1.69492
Ttc12	pulmonary.ionocyte..type.II.pneumocyte	-0.329205	1.69492
Spag1	pulmonary.ionocyte..type.II.pneumocyte	-0.35406	0
Rsph9	pulmonary.ionocyte..type.II.pneumocyte	-0.251815	13.5593
Rsph4a	pulmonary.ionocyte..type.II.pneumocyte	-0.300931	0
Rsph3b	pulmonary.ionocyte..type.II.pneumocyte	-0.0134204	10.1695
Rsph3a	pulmonary.ionocyte..type.II.pneumocyte	-0.1713	13.5593
Rsph1	pulmonary.ionocyte..type.II.pneumocyte	-0.276875	0
Lrrc56	pulmonary.ionocyte..type.II.pneumocyte	-0.271813	1.69492
Lrrc6	pulmonary.ionocyte..type.II.pneumocyte	-0.267261	0
Hydin	pulmonary.ionocyte..type.II.pneumocyte	-0.274898	0
Gas8	pulmonary.ionocyte..type.II.pneumocyte	-0.221401	10.1695
Gas2l2	pulmonary.ionocyte..type.II.pneumocyte	-0.267261	0
Foxj1	pulmonary.ionocyte..type.II.pneumocyte	-0.275072	0
Dnajb13	pulmonary.ionocyte..type.II.pneumocyte	-0.316628	0
Ccdc65	pulmonary.ionocyte..type.II.pneumocyte	-0.2351	1.69492
Ccdc40	pulmonary.ionocyte..type.II.pneumocyte	-0.288224	0
Ccdc39	pulmonary.ionocyte..type.II.pneumocyte	-0.217445	1.69492
Ccdc103	pulmonary.ionocyte..type.II.pneumocyte	-0.283658	0
Zmynd10	pulmonary.artery.endothelial.cell	-0.273502	0
Ttc12	pulmonary.artery.endothelial.cell	-0.259565	2.5
Spag1	pulmonary.artery.endothelial.cell	-0.35406	0
Rsph9	pulmonary.artery.endothelial.cell	-0.360617	0
Rsph4a	pulmonary.artery.endothelial.cell	-0.300931	0
Rsph3b	pulmonary.artery.endothelial.cell	-0.0959575	2.5
Rsph3a	pulmonary.artery.endothelial.cell	-0.221286	4.16667
Rsph1	pulmonary.artery.endothelial.cell	-0.276875	0
Lrrc56	pulmonary.artery.endothelial.cell	-0.328636	0
Lrrc6	pulmonary.artery.endothelial.cell	-0.267261	0
Hydin	pulmonary.artery.endothelial.cell	-0.274898	0
Gas8	pulmonary.artery.endothelial.cell	-0.181096	5
Gas2l2	pulmonary.artery.endothelial.cell	-0.267261	0
Foxj1	pulmonary.artery.endothelial.cell	-0.275072	0
Dnajb13	pulmonary.artery.endothelial.cell	-0.298587	0.833333
Ccdc65	pulmonary.artery.endothelial.cell	-0.273893	0
Ccdc40	pulmonary.artery.endothelial.cell	-0.288224	0
Ccdc39	pulmonary.artery.endothelial.cell	-0.278926	0
Ccdc103	pulmonary.artery.endothelial.cell	-0.283658	0
Zmynd10	capillary.endothelial.cell	-0.273502	0
Ttc12	capillary.endothelial.cell	-0.232667	3.44828
Spag1	capillary.endothelial.cell	-0.35406	0
Rsph9	capillary.endothelial.cell	-0.360617	0
Rsph4a	capillary.endothelial.cell	-0.300931	0
Rsph3b	capillary.endothelial.cell	-0.445868	0
Rsph3a	capillary.endothelial.cell	-0.220581	10.3448
Rsph1	capillary.endothelial.cell	-0.276875	0
Lrrc56	capillary.endothelial.cell	-0.328636	0
Lrrc6	capillary.endothelial.cell	-0.267261	0
Hydin	capillary.endothelial.cell	-0.274898	0
Gas8	capillary.endothelial.cell	-0.234503	6.89655
Gas2l2	capillary.endothelial.cell	-0.267261	0
Foxj1	capillary.endothelial.cell	-0.275072	0
Dnajb13	capillary.endothelial.cell	-0.316628	0
Ccdc65	capillary.endothelial.cell	-0.273893	0
Ccdc40	capillary.endothelial.cell	-0.212012	3.44828
Ccdc39	capillary.endothelial.cell	-0.278926	0
Ccdc103	capillary.endothelial.cell	-0.283658	0
Zmynd10	pericyte.cell	-0.273502	0
Ttc12	pericyte.cell	-0.0256904	4
Spag1	pericyte.cell	-0.35406	0
Rsph9	pericyte.cell	0.226052	8
Rsph4a	pericyte.cell	-0.300931	0
Rsph3b	pericyte.cell	-0.445868	0
Rsph3a	pericyte.cell	-0.710731	0
Rsph1	pericyte.cell	-0.276875	0
Lrrc56	pericyte.cell	-0.328636	0
Lrrc6	pericyte.cell	-0.267261	0
Hydin	pericyte.cell	-0.274898	0
Gas8	pericyte.cell	-0.197644	4
Gas2l2	pericyte.cell	-0.267261	0
Foxj1	pericyte.cell	-0.275072	0
Dnajb13	pericyte.cell	-0.316628	0
Ccdc65	pericyte.cell	-0.273893	0
Ccdc40	pericyte.cell	-0.288224	0
Ccdc39	pericyte.cell	-0.278926	0
Ccdc103	pericyte.cell	-0.283658	0
Zmynd10	B.cell	-0.273502	0
Ttc12	B.cell	-0.371618	0
Spag1	B.cell	-0.35406	0
Rsph9	B.cell	-0.360617	0
Rsph4a	B.cell	-0.300931	0
Rsph3b	B.cell	-0.445868	0
Rsph3a	B.cell	0.0291638	6.06061
Rsph1	B.cell	-0.276875	0
Lrrc56	B.cell	-0.22891	3.0303
Lrrc6	B.cell	-0.267261	0
Hydin	B.cell	-0.274898	0
Gas8	B.cell	-0.357253	3.0303
Gas2l2	B.cell	-0.267261	0
Foxj1	B.cell	-0.275072	0
Dnajb13	B.cell	-0.316628	0
Ccdc65	B.cell	-0.273893	0
Ccdc40	B.cell	-0.288224	0
Ccdc39	B.cell	-0.278926	0
Ccdc103	B.cell	-0.283658	0
Zmynd10	neutrophil	-0.273502	0
Ttc12	neutrophil	-0.371618	0
Spag1	neutrophil	-0.35406	0
Rsph9	neutrophil	-0.360617	0
Rsph4a	neutrophil	-0.300931	0
Rsph3b	neutrophil	-0.445868	0
Rsph3a	neutrophil	-0.0490085	3.7037
Rsph1	neutrophil	-0.209043	3.7037
Lrrc56	neutrophil	-0.328636	0
Lrrc6	neutrophil	-0.267261	0
Hydin	neutrophil	-0.274898	0
Gas8	neutrophil	-0.413124	0
Gas2l2	neutrophil	-0.267261	0
Foxj1	neutrophil	-0.275072	0
Dnajb13	neutrophil	-0.316628	0
Ccdc65	neutrophil	-0.273893	0
Ccdc40	neutrophil	-0.288224	0
Ccdc39	neutrophil	-0.278926	0
Ccdc103	neutrophil	-0.283658	0
Zmynd10	alveolar.macrophage	-0.273502	0
Ttc12	alveolar.macrophage	-0.324781	0.892857
Spag1	alveolar.macrophage	-0.35406	0
Rsph9	alveolar.macrophage	-0.360617	0
Rsph4a	alveolar.macrophage	-0.300931	0
Rsph3b	alveolar.macrophage	-0.0652963	5.35714
Rsph3a	alveolar.macrophage	-0.345487	4.46429
Rsph1	alveolar.macrophage	-0.260843	2.67857
Lrrc56	alveolar.macrophage	-0.265872	0.892857
Lrrc6	alveolar.macrophage	-0.267261	0
Hydin	alveolar.macrophage	-0.274898	0
Gas8	alveolar.macrophage	-0.34343	3.57143
Gas2l2	alveolar.macrophage	-0.267261	0
Foxj1	alveolar.macrophage	-0.271309	0.892857
Dnajb13	alveolar.macrophage	0.337189	16.9643
Ccdc65	alveolar.macrophage	-0.273893	0
Ccdc40	alveolar.macrophage	-0.263446	0.892857
Ccdc39	alveolar.macrophage	-0.262152	0.892857
Ccdc103	alveolar.macrophage	-0.283658	0
Zmynd10	classical.monocyte	-0.241384	2.24719
Ttc12	classical.monocyte	-0.371618	0
Spag1	classical.monocyte	-0.154151	1.1236
Rsph9	classical.monocyte	-0.351095	1.1236
Rsph4a	classical.monocyte	-0.285955	1.1236
Rsph3b	classical.monocyte	-0.413253	1.1236
Rsph3a	classical.monocyte	-0.0953219	14.6067
Rsph1	classical.monocyte	-0.262029	3.37079
Lrrc56	classical.monocyte	-0.186384	3.37079
Lrrc6	classical.monocyte	-0.267261	0
Hydin	classical.monocyte	-0.249072	1.1236
Gas8	classical.monocyte	-0.25614	6.74157
Gas2l2	classical.monocyte	-0.267261	0
Foxj1	classical.monocyte	-0.270522	1.1236
Dnajb13	classical.monocyte	-0.295375	1.1236
Ccdc65	classical.monocyte	-0.247948	1.1236
Ccdc40	classical.monocyte	-0.256296	1.1236
Ccdc39	classical.monocyte	-0.257714	1.1236
Ccdc103	classical.monocyte	-0.283658	0
Zmynd10	non.classical.monocyte	-0.273502	0
Ttc12	non.classical.monocyte	-0.371618	0
Spag1	non.classical.monocyte	-0.35406	0
Rsph9	non.classical.monocyte	-0.360617	0
Rsph4a	non.classical.monocyte	-0.300931	0
Rsph3b	non.classical.monocyte	-0.312487	3.125
Rsph3a	non.classical.monocyte	-0.585346	3.125
Rsph1	non.classical.monocyte	-0.276875	0
Lrrc56	non.classical.monocyte	-0.0604653	4.6875
Lrrc6	non.classical.monocyte	-0.267261	0
Hydin	non.classical.monocyte	-0.274898	0
Gas8	non.classical.monocyte	-0.413124	0
Gas2l2	non.classical.monocyte	-0.267261	0
Foxj1	non.classical.monocyte	-0.275072	0
Dnajb13	non.classical.monocyte	-0.316628	0
Ccdc65	non.classical.monocyte	-0.273893	0
Ccdc40	non.classical.monocyte	-0.288224	0
Ccdc39	non.classical.monocyte	-0.278926	0
Ccdc103	non.classical.monocyte	-0.283658	0
Zmynd10	lymphocyte	-0.241301	0.584795
Ttc12	lymphocyte	-0.371618	0
Spag1	lymphocyte	-0.35406	0
Rsph9	lymphocyte	-0.299377	1.75439
Rsph4a	lymphocyte	-0.278195	0.584795
Rsph3b	lymphocyte	-0.340579	1.16959
Rsph3a	lymphocyte	-0.284043	4.67836
Rsph1	lymphocyte	-0.268806	1.16959
Lrrc56	lymphocyte	-0.328636	0
Lrrc6	lymphocyte	-0.267261	0
Hydin	lymphocyte	-0.274898	0
Gas8	lymphocyte	-0.388307	0.584795
Gas2l2	lymphocyte	-0.267261	0
Foxj1	lymphocyte	-0.243138	2.33918
Dnajb13	lymphocyte	-0.316628	0
Ccdc65	lymphocyte	-0.273893	0
Ccdc40	lymphocyte	-0.288224	0
Ccdc39	lymphocyte	-0.278926	0
Ccdc103	lymphocyte	-0.283658	0
Zmynd10	myofibroblast.cell	-0.273502	0
Ttc12	myofibroblast.cell	0.0570467	4.61538
Spag1	myofibroblast.cell	0.247942	1.53846
Rsph9	myofibroblast.cell	-0.150465	9.23077
Rsph4a	myofibroblast.cell	0.0193396	4.61538
Rsph3b	myofibroblast.cell	0.0911709	1.53846
Rsph3a	myofibroblast.cell	0.0632683	4.61538
Rsph1	myofibroblast.cell	-0.276875	0
Lrrc56	myofibroblast.cell	-0.328636	0
Lrrc6	myofibroblast.cell	-0.267261	0
Hydin	myofibroblast.cell	-0.274898	0
Gas8	myofibroblast.cell	-0.190885	4.61538
Gas2l2	myofibroblast.cell	-0.267261	0
Foxj1	myofibroblast.cell	-0.25799	1.53846
Dnajb13	myofibroblast.cell	-0.316628	0
Ccdc65	myofibroblast.cell	-0.273893	0
Ccdc40	myofibroblast.cell	-0.288224	0
Ccdc39	myofibroblast.cell	-0.278926	0
Ccdc103	myofibroblast.cell	-0.283658	0
Zmynd10	fibroblast	-0.273502	0
Ttc12	fibroblast	-0.148289	3.50877
Spag1	fibroblast	0.0321091	1.09649
Rsph9	fibroblast	-0.199794	7.67544
Rsph4a	fibroblast	-0.2425	1.09649
Rsph3b	fibroblast	-0.205822	2.19298
Rsph3a	fibroblast	-0.377424	3.94737
Rsph1	fibroblast	-0.265019	0.438596
Lrrc56	fibroblast	-0.23331	1.09649
Lrrc6	fibroblast	-0.267261	0
Hydin	fibroblast	-0.200728	1.09649
Gas8	fibroblast	-0.154237	5.04386
Gas2l2	fibroblast	-0.267261	0
Foxj1	fibroblast	-0.253706	1.09649
Dnajb13	fibroblast	-0.315299	0.219298
Ccdc65	fibroblast	-0.273893	0
Ccdc40	fibroblast	-0.26427	0.219298
Ccdc39	fibroblast	-0.273925	0.438596
Ccdc103	fibroblast	-0.283658	0
Zmynd10	fibroblast.1	-0.273502	0
Ttc12	fibroblast.1	-0.320493	1.49254
Spag1	fibroblast.1	-0.35406	0
Rsph9	fibroblast.1	-0.240807	8.20896
Rsph4a	fibroblast.1	-0.267283	1.49254
Rsph3b	fibroblast.1	-0.278282	2.98507
Rsph3a	fibroblast.1	-0.421422	3.73134
Rsph1	fibroblast.1	-0.269985	2.23881
Lrrc56	fibroblast.1	-0.245787	1.49254
Lrrc6	fibroblast.1	-0.267261	0
Hydin	fibroblast.1	-0.274898	0
Gas8	fibroblast.1	-0.10565	7.46269
Gas2l2	fibroblast.1	-0.267261	0
Foxj1	fibroblast.1	-0.25202	2.98507
Dnajb13	fibroblast.1	-0.316628	0
Ccdc65	fibroblast.1	-0.252142	0.746269
Ccdc40	fibroblast.1	-0.170433	1.49254
Ccdc39	fibroblast.1	-0.231081	1.49254
Ccdc103	fibroblast.1	-0.0645757	0.746269

## Sheet: Figure 2D
Disease\Phenotypic series accession (OMIM)	Disease\Phenotypic series name (OMIM)	Mouse cell type	PrEDiCT score	Cell type likely affected by disease (1=Yes, 0=No)
140700	Heinz Body Anemias	proerythroblast	0.496523	0
140700	Heinz Body Anemias	reticulocyte	3.43961	1
140700	Heinz Body Anemias	erythroblast	2.1605	1
140700	Heinz Body Anemias	plasma cell	-0.34172	0
140700	Heinz Body Anemias	early pro-B cell	-0.363648	0
140700	Heinz Body Anemias	precursor B cell	-0.36602	0
140700	Heinz Body Anemias	immature B cell	-0.368739	0
140700	Heinz Body Anemias	basophil	-0.354087	0
140700	Heinz Body Anemias	myelocyte	-0.368842	0
140700	Heinz Body Anemias	hematopoietic stem cell	-0.355145	0
140700	Heinz Body Anemias	macrophage	-0.349351	0
140700	Heinz Body Anemias	T cell	-0.321425	0
140700	Heinz Body Anemias	mature B cell	-0.352642	0
140700	Heinz Body Anemias	monocyte	-0.356603	0
140700	Heinz Body Anemias	conventional dendritic cell	-0.363038	0
140700	Heinz Body Anemias	promyelocyte	-0.367215	0
140700	Heinz Body Anemias	neutrophilic myeloblast	-0.369065	0
140700	Heinz Body Anemias	neutrophilic metamyelocyte	-0.365754	0
140700	Heinz Body Anemias	band form neutrophil	-0.362642	0
140700	Heinz Body Anemias	segmented neutrophil of bone marrow	-0.370697	0

## Sheet: Figure 2E
Disease\Phenotypic series accession (OMIM)	Disease\Phenotypic series name (OMIM)	Mouse cell type	PrEDiCT score	Cell type likely affected by disease (1=Yes, 0=No)
PS124000	Mitochondrial complex III deficiency, nuclear type	striated muscle cell	4.0161	1
PS124000	Mitochondrial complex III deficiency, nuclear type	macrophage	-0.269809	0
PS124000	Mitochondrial complex III deficiency, nuclear type	monocyte-derived dendritic cell	0.0427129	0
PS124000	Mitochondrial complex III deficiency, nuclear type	T-helper 17 cell	0.0622741	0
PS124000	Mitochondrial complex III deficiency, nuclear type	skeletal muscle satellite cell	-0.119019	0
PS124000	Mitochondrial complex III deficiency, nuclear type	CD8-positive, alpha-beta T cell	-0.153091	0
PS124000	Mitochondrial complex III deficiency, nuclear type	B cell	-0.164049	0
PS124000	Mitochondrial complex III deficiency, nuclear type	endothelial cell of lymphatic vessel	-0.082776	0
PS124000	Mitochondrial complex III deficiency, nuclear type	vein endothelial cell; endothelial stalk cell	-0.265117	0
PS124000	Mitochondrial complex III deficiency, nuclear type	endothelial cell of artery	-0.353926	0
PS124000	Mitochondrial complex III deficiency, nuclear type	capillary endothelial cell	-0.230573	0
PS124000	Mitochondrial complex III deficiency, nuclear type	blood vessel endothelial cell	-0.362465	0
PS124000	Mitochondrial complex III deficiency, nuclear type	pericyte cell	0.0599334	0
PS124000	Mitochondrial complex III deficiency, nuclear type	tendon cell	-0.494757	0
PS124000	Mitochondrial complex III deficiency, nuclear type	stromal cell	-0.5585	0
PS124000	Mitochondrial complex III deficiency, nuclear type	skeletal muscle fibroblast; fibroblast	-0.416539	0
PS124000	Mitochondrial complex III deficiency, nuclear type	skeletal muscle fibroblast; fibroblast.1	-0.3338	0
PS124000	Mitochondrial complex III deficiency, nuclear type	myelinating Schwann cell	-0.247578	0
PS124000	Mitochondrial complex III deficiency, nuclear type	smooth muscle cell	-0.129026	0
PS220110	Mitochondrial complex IV deficiency, nuclear-type	striated muscle cell	2.35696	1
PS220110	Mitochondrial complex IV deficiency, nuclear-type	macrophage	-0.227664	0
PS220110	Mitochondrial complex IV deficiency, nuclear-type	monocyte-derived dendritic cell	-0.182293	0
PS220110	Mitochondrial complex IV deficiency, nuclear-type	T-helper 17 cell	0.239285	0
PS220110	Mitochondrial complex IV deficiency, nuclear-type	skeletal muscle satellite cell	-0.299841	0
PS220110	Mitochondrial complex IV deficiency, nuclear-type	CD8-positive, alpha-beta T cell	-0.274885	0
PS220110	Mitochondrial complex IV deficiency, nuclear-type	B cell	-0.239985	0
PS220110	Mitochondrial complex IV deficiency, nuclear-type	endothelial cell of lymphatic vessel	0.025381	0
PS220110	Mitochondrial complex IV deficiency, nuclear-type	vein endothelial cell; endothelial stalk cell	-0.280722	0
PS220110	Mitochondrial complex IV deficiency, nuclear-type	endothelial cell of artery	-0.407923	0
PS220110	Mitochondrial complex IV deficiency, nuclear-type	capillary endothelial cell	-0.201673	0
PS220110	Mitochondrial complex IV deficiency, nuclear-type	blood vessel endothelial cell	-0.335275	0
PS220110	Mitochondrial complex IV deficiency, nuclear-type	pericyte cell	-0.154518	0
PS220110	Mitochondrial complex IV deficiency, nuclear-type	tendon cell	-0.491522	0
PS220110	Mitochondrial complex IV deficiency, nuclear-type	stromal cell	-0.347455	0
PS220110	Mitochondrial complex IV deficiency, nuclear-type	skeletal muscle fibroblast; fibroblast	-0.375846	0
PS220110	Mitochondrial complex IV deficiency, nuclear-type	skeletal muscle fibroblast; fibroblast.1	-0.327322	0
PS220110	Mitochondrial complex IV deficiency, nuclear-type	myelinating Schwann cell	-0.176686	0
PS220110	Mitochondrial complex IV deficiency, nuclear-type	smooth muscle cell	-0.059166	0
PS252010	Mitochondrial complex I deficiency, nuclear type	striated muscle cell	3.76534	1
PS252010	Mitochondrial complex I deficiency, nuclear type	macrophage	-0.357761	0
PS252010	Mitochondrial complex I deficiency, nuclear type	monocyte-derived dendritic cell	-0.278395	0
PS252010	Mitochondrial complex I deficiency, nuclear type	T-helper 17 cell	-0.255303	0
PS252010	Mitochondrial complex I deficiency, nuclear type	skeletal muscle satellite cell	-0.395313	0
PS252010	Mitochondrial complex I deficiency, nuclear type	CD8-positive, alpha-beta T cell	-0.397412	0
PS252010	Mitochondrial complex I deficiency, nuclear type	B cell	-0.361013	0
PS252010	Mitochondrial complex I deficiency, nuclear type	endothelial cell of lymphatic vessel	-0.144171	0
PS252010	Mitochondrial complex I deficiency, nuclear type	vein endothelial cell; endothelial stalk cell	-0.336484	0
PS252010	Mitochondrial complex I deficiency, nuclear type	endothelial cell of artery	-0.368699	0
PS252010	Mitochondrial complex I deficiency, nuclear type	capillary endothelial cell	-0.133017	0
PS252010	Mitochondrial complex I deficiency, nuclear type	blood vessel endothelial cell	-0.40274	0
PS252010	Mitochondrial complex I deficiency, nuclear type	pericyte cell	0.116719	0
PS252010	Mitochondrial complex I deficiency, nuclear type	tendon cell	-0.336384	0
PS252010	Mitochondrial complex I deficiency, nuclear type	stromal cell	-0.238847	0
PS252010	Mitochondrial complex I deficiency, nuclear type	skeletal muscle fibroblast; fibroblast	-0.357007	0
PS252010	Mitochondrial complex I deficiency, nuclear type	skeletal muscle fibroblast; fibroblast.1	-0.230521	0
PS252010	Mitochondrial complex I deficiency, nuclear type	myelinating Schwann cell	-0.0923943	0
PS252010	Mitochondrial complex I deficiency, nuclear type	smooth muscle cell	0.187472	0
PS252011	Mitochondrial complex II deficiency, nuclear type	striated muscle cell	1.99042	0
PS252011	Mitochondrial complex II deficiency, nuclear type	macrophage	-0.799887	0
PS252011	Mitochondrial complex II deficiency, nuclear type	monocyte-derived dendritic cell	-0.79729	0
PS252011	Mitochondrial complex II deficiency, nuclear type	T-helper 17 cell	-0.579167	0
PS252011	Mitochondrial complex II deficiency, nuclear type	skeletal muscle satellite cell	-0.188998	0
PS252011	Mitochondrial complex II deficiency, nuclear type	CD8-positive, alpha-beta T cell	-0.498771	0
PS252011	Mitochondrial complex II deficiency, nuclear type	B cell	-0.796913	0
PS252011	Mitochondrial complex II deficiency, nuclear type	endothelial cell of lymphatic vessel	0.637281	0
PS252011	Mitochondrial complex II deficiency, nuclear type	vein endothelial cell; endothelial stalk cell	0.352076	0
PS252011	Mitochondrial complex II deficiency, nuclear type	endothelial cell of artery	-0.352467	0
PS252011	Mitochondrial complex II deficiency, nuclear type	capillary endothelial cell	0.301732	0
PS252011	Mitochondrial complex II deficiency, nuclear type	blood vessel endothelial cell	0.0428739	0
PS252011	Mitochondrial complex II deficiency, nuclear type	pericyte cell	0.921399	0
PS252011	Mitochondrial complex II deficiency, nuclear type	tendon cell	-0.494523	0
PS252011	Mitochondrial complex II deficiency, nuclear type	stromal cell	-0.925715	0
PS252011	Mitochondrial complex II deficiency, nuclear type	skeletal muscle fibroblast; fibroblast	-0.754234	0
PS252011	Mitochondrial complex II deficiency, nuclear type	skeletal muscle fibroblast; fibroblast.1	-0.557525	0
PS252011	Mitochondrial complex II deficiency, nuclear type	myelinating Schwann cell	-0.30032	0
PS252011	Mitochondrial complex II deficiency, nuclear type	smooth muscle cell	2.80003	0
PS604273	Mitochondrial complex V (ATP synthase) deficiency, nuclear type	striated muscle cell	3.27403	1
PS604273	Mitochondrial complex V (ATP synthase) deficiency, nuclear type	macrophage	-0.586861	0
PS604273	Mitochondrial complex V (ATP synthase) deficiency, nuclear type	monocyte-derived dendritic cell	-0.739807	0
PS604273	Mitochondrial complex V (ATP synthase) deficiency, nuclear type	T-helper 17 cell	0.914002	0
PS604273	Mitochondrial complex V (ATP synthase) deficiency, nuclear type	skeletal muscle satellite cell	-0.408932	0
PS604273	Mitochondrial complex V (ATP synthase) deficiency, nuclear type	CD8-positive, alpha-beta T cell	-0.281838	0
PS604273	Mitochondrial complex V (ATP synthase) deficiency, nuclear type	B cell	-0.23286	0
PS604273	Mitochondrial complex V (ATP synthase) deficiency, nuclear type	endothelial cell of lymphatic vessel	-0.326655	0
PS604273	Mitochondrial complex V (ATP synthase) deficiency, nuclear type	vein endothelial cell; endothelial stalk cell	-0.539225	0
PS604273	Mitochondrial complex V (ATP synthase) deficiency, nuclear type	endothelial cell of artery	-0.408815	0
PS604273	Mitochondrial complex V (ATP synthase) deficiency, nuclear type	capillary endothelial cell	-0.292272	0
PS604273	Mitochondrial complex V (ATP synthase) deficiency, nuclear type	blood vessel endothelial cell	-0.105704	0
PS604273	Mitochondrial complex V (ATP synthase) deficiency, nuclear type	pericyte cell	0.0943161	0
PS604273	Mitochondrial complex V (ATP synthase) deficiency, nuclear type	tendon cell	-0.433458	0
PS604273	Mitochondrial complex V (ATP synthase) deficiency, nuclear type	stromal cell	-0.371545	0
PS604273	Mitochondrial complex V (ATP synthase) deficiency, nuclear type	skeletal muscle fibroblast; fibroblast	-0.359477	0
PS604273	Mitochondrial complex V (ATP synthase) deficiency, nuclear type	skeletal muscle fibroblast; fibroblast.1	-0.458042	0
PS604273	Mitochondrial complex V (ATP synthase) deficiency, nuclear type	myelinating Schwann cell	-0.0412564	0
PS604273	Mitochondrial complex V (ATP synthase) deficiency, nuclear type	smooth muscle cell	-0.201088	0

## Sheet: Figure 2F
Human PrEDiCT score	Mouse PrEDiCT score	Matching (1=Matching, 0=Non-matching)
2.20826	-0.924778	0
2.20826	-0.634672	0
2.20826	-0.569621	0
2.20826	0.503858	0
2.20826	-0.707646	0
2.20826	-0.440269	0
2.20826	-0.587968	0
2.20826	0.564108	0
2.20826	1.09094	0
2.20826	1.44528	1
2.20826	1.42192	1
2.20826	0.806459	1
2.20826	0.311937	0
2.20826	-0.673902	0
2.20826	-0.847412	0
2.20826	-0.744222	0
2.20826	-0.866732	0
2.20826	-0.36064	0
2.20826	1.21336	0
-0.594598	-0.924778	0
-0.594598	-0.634672	0
-0.594598	-0.569621	0
-0.594598	0.503858	0
-0.594598	-0.707646	0
-0.594598	-0.440269	1
-0.594598	-0.587968	0
-0.594598	0.564108	0
-0.594598	1.09094	0
-0.594598	1.44528	0
-0.594598	1.42192	0
-0.594598	0.806459	0
-0.594598	0.311937	0
-0.594598	-0.673902	0
-0.594598	-0.847412	0
-0.594598	-0.744222	0
-0.594598	-0.866732	0
-0.594598	-0.36064	0
-0.594598	1.21336	0
-0.601392	-0.924778	0
-0.601392	-0.634672	0
-0.601392	-0.569621	0
-0.601392	0.503858	0
-0.601392	-0.707646	0
-0.601392	-0.440269	1
-0.601392	-0.587968	0
-0.601392	0.564108	0
-0.601392	1.09094	0
-0.601392	1.44528	0
-0.601392	1.42192	0
-0.601392	0.806459	0
-0.601392	0.311937	0
-0.601392	-0.673902	0
-0.601392	-0.847412	0
-0.601392	-0.744222	0
-0.601392	-0.866732	0
-0.601392	-0.36064	0
-0.601392	1.21336	0
1.85785	-0.924778	0
1.85785	-0.634672	0
1.85785	-0.569621	0
1.85785	0.503858	0
1.85785	-0.707646	0
1.85785	-0.440269	0
1.85785	-0.587968	0
1.85785	0.564108	0
1.85785	1.09094	0
1.85785	1.44528	1
1.85785	1.42192	1
1.85785	0.806459	0
1.85785	0.311937	0
1.85785	-0.673902	0
1.85785	-0.847412	0
1.85785	-0.744222	0
1.85785	-0.866732	0
1.85785	-0.36064	0
1.85785	1.21336	0
1.36048	-0.924778	0
1.36048	-0.634672	0
1.36048	-0.569621	0
1.36048	0.503858	0
1.36048	-0.707646	0
1.36048	-0.440269	0
1.36048	-0.587968	0
1.36048	0.564108	1
1.36048	1.09094	0
1.36048	1.44528	0
1.36048	1.42192	0
1.36048	0.806459	0
1.36048	0.311937	0
1.36048	-0.673902	0
1.36048	-0.847412	0
1.36048	-0.744222	0
1.36048	-0.866732	0
1.36048	-0.36064	0
1.36048	1.21336	0
1.11744	-0.924778	0
1.11744	-0.634672	0
1.11744	-0.569621	0
1.11744	0.503858	0
1.11744	-0.707646	0
1.11744	-0.440269	0
1.11744	-0.587968	0
1.11744	0.564108	0
1.11744	1.09094	0
1.11744	1.44528	0
1.11744	1.42192	0
1.11744	0.806459	0
1.11744	0.311937	0
1.11744	-0.673902	0
1.11744	-0.847412	0
1.11744	-0.744222	0
1.11744	-0.866732	0
1.11744	-0.36064	0
1.11744	1.21336	0
-0.357499	-0.924778	0
-0.357499	-0.634672	0
-0.357499	-0.569621	0
-0.357499	0.503858	0
-0.357499	-0.707646	0
-0.357499	-0.440269	0
-0.357499	-0.587968	0
-0.357499	0.564108	0
-0.357499	1.09094	0
-0.357499	1.44528	0
-0.357499	1.42192	0
-0.357499	0.806459	0
-0.357499	0.311937	0
-0.357499	-0.673902	0
-0.357499	-0.847412	0
-0.357499	-0.744222	0
-0.357499	-0.866732	0
-0.357499	-0.36064	0
-0.357499	1.21336	0
-0.651069	-0.924778	1
-0.651069	-0.634672	0
-0.651069	-0.569621	0
-0.651069	0.503858	0
-0.651069	-0.707646	0
-0.651069	-0.440269	0
-0.651069	-0.587968	0
-0.651069	0.564108	0
-0.651069	1.09094	0
-0.651069	1.44528	0
-0.651069	1.42192	0
-0.651069	0.806459	0
-0.651069	0.311937	0
-0.651069	-0.673902	0
-0.651069	-0.847412	0
-0.651069	-0.744222	0
-0.651069	-0.866732	0
-0.651069	-0.36064	0
-0.651069	1.21336	0
-0.243961	-0.924778	0
-0.243961	-0.634672	1
-0.243961	-0.569621	1
-0.243961	0.503858	0
-0.243961	-0.707646	0
-0.243961	-0.440269	0
-0.243961	-0.587968	0
-0.243961	0.564108	0
-0.243961	1.09094	0
-0.243961	1.44528	0
-0.243961	1.42192	0
-0.243961	0.806459	0
-0.243961	0.311937	0
-0.243961	-0.673902	0
-0.243961	-0.847412	0
-0.243961	-0.744222	0
-0.243961	-0.866732	0
-0.243961	-0.36064	0
-0.243961	1.21336	0
-0.66159	-0.924778	0
-0.66159	-0.634672	0
-0.66159	-0.569621	0
-0.66159	0.503858	0
-0.66159	-0.707646	0
-0.66159	-0.440269	0
-0.66159	-0.587968	0
-0.66159	0.564108	0
-0.66159	1.09094	0
-0.66159	1.44528	0
-0.66159	1.42192	0
-0.66159	0.806459	0
-0.66159	0.311937	0
-0.66159	-0.673902	0
-0.66159	-0.847412	0
-0.66159	-0.744222	0
-0.66159	-0.866732	0
-0.66159	-0.36064	0
-0.66159	1.21336	0
-0.66159	-0.924778	0
-0.66159	-0.634672	0
-0.66159	-0.569621	0
-0.66159	0.503858	1
-0.66159	-0.707646	0
-0.66159	-0.440269	0
-0.66159	-0.587968	0
-0.66159	0.564108	0
-0.66159	1.09094	0
-0.66159	1.44528	0
-0.66159	1.42192	0
-0.66159	0.806459	0
-0.66159	0.311937	0
-0.66159	-0.673902	0
-0.66159	-0.847412	0
-0.66159	-0.744222	0
-0.66159	-0.866732	0
-0.66159	-0.36064	0
-0.66159	1.21336	0
-0.460652	-0.924778	0
-0.460652	-0.634672	0
-0.460652	-0.569621	0
-0.460652	0.503858	0
-0.460652	-0.707646	0
-0.460652	-0.440269	0
-0.460652	-0.587968	0
-0.460652	0.564108	0
-0.460652	1.09094	0
-0.460652	1.44528	0
-0.460652	1.42192	0
-0.460652	0.806459	0
-0.460652	0.311937	0
-0.460652	-0.673902	0
-0.460652	-0.847412	1
-0.460652	-0.744222	0
-0.460652	-0.866732	0
-0.460652	-0.36064	0
-0.460652	1.21336	0
-0.66159	-0.924778	0
-0.66159	-0.634672	0
-0.66159	-0.569621	0
-0.66159	0.503858	0
-0.66159	-0.707646	0
-0.66159	-0.440269	0
-0.66159	-0.587968	0
-0.66159	0.564108	0
-0.66159	1.09094	0
-0.66159	1.44528	0
-0.66159	1.42192	0
-0.66159	0.806459	0
-0.66159	0.311937	0
-0.66159	-0.673902	0
-0.66159	-0.847412	0
-0.66159	-0.744222	0
-0.66159	-0.866732	0
-0.66159	-0.36064	0
-0.66159	1.21336	0
0.758479	-0.924778	0
0.758479	-0.634672	0
0.758479	-0.569621	0
0.758479	0.503858	0
0.758479	-0.707646	0
0.758479	-0.440269	0
0.758479	-0.587968	0
0.758479	0.564108	0
0.758479	1.09094	0
0.758479	1.44528	0
0.758479	1.42192	0
0.758479	0.806459	0
0.758479	0.311937	1
0.758479	-0.673902	0
0.758479	-0.847412	0
0.758479	-0.744222	0
0.758479	-0.866732	0
0.758479	-0.36064	0
0.758479	1.21336	0
-0.525053	-0.924778	0
-0.525053	-0.634672	0
-0.525053	-0.569621	0
-0.525053	0.503858	0
-0.525053	-0.707646	1
-0.525053	-0.440269	0
-0.525053	-0.587968	0
-0.525053	0.564108	0
-0.525053	1.09094	0
-0.525053	1.44528	0
-0.525053	1.42192	0
-0.525053	0.806459	0
-0.525053	0.311937	0
-0.525053	-0.673902	0
-0.525053	-0.847412	0
-0.525053	-0.744222	0
-0.525053	-0.866732	0
-0.525053	-0.36064	0
-0.525053	1.21336	0
-0.66159	-0.924778	1
-0.66159	-0.634672	0
-0.66159	-0.569621	0
-0.66159	0.503858	0
-0.66159	-0.707646	0
-0.66159	-0.440269	0
-0.66159	-0.587968	0
-0.66159	0.564108	0
-0.66159	1.09094	0
-0.66159	1.44528	0
-0.66159	1.42192	0
-0.66159	0.806459	0
-0.66159	0.311937	0
-0.66159	-0.673902	0
-0.66159	-0.847412	0
-0.66159	-0.744222	0
-0.66159	-0.866732	0
-0.66159	-0.36064	0
-0.66159	1.21336	0
-0.425264	-0.924778	0
-0.425264	-0.634672	0
-0.425264	-0.569621	0
-0.425264	0.503858	0
-0.425264	-0.707646	0
-0.425264	-0.440269	0
-0.425264	-0.587968	0
-0.425264	0.564108	0
-0.425264	1.09094	0
-0.425264	1.44528	0
-0.425264	1.42192	0
-0.425264	0.806459	0
-0.425264	0.311937	1
-0.425264	-0.673902	0
-0.425264	-0.847412	0
-0.425264	-0.744222	0
-0.425264	-0.866732	0
-0.425264	-0.36064	0
-0.425264	1.21336	0
-0.580461	-0.924778	0
-0.580461	-0.634672	0
-0.580461	-0.569621	0
-0.580461	0.503858	1
-0.580461	-0.707646	0
-0.580461	-0.440269	0
-0.580461	-0.587968	1
-0.580461	0.564108	0
-0.580461	1.09094	0
-0.580461	1.44528	0
-0.580461	1.42192	0
-0.580461	0.806459	0
-0.580461	0.311937	0
-0.580461	-0.673902	0
-0.580461	-0.847412	0
-0.580461	-0.744222	0
-0.580461	-0.866732	0
-0.580461	-0.36064	0
-0.580461	1.21336	0
-0.216198	-0.924778	0
-0.216198	-0.634672	0
-0.216198	-0.569621	0
-0.216198	0.503858	0
-0.216198	-0.707646	0
-0.216198	-0.440269	0
-0.216198	-0.587968	0
-0.216198	0.564108	0
-0.216198	1.09094	0
-0.216198	1.44528	0
-0.216198	1.42192	0
-0.216198	0.806459	0
-0.216198	0.311937	0
-0.216198	-0.673902	1
-0.216198	-0.847412	0
-0.216198	-0.744222	0
-0.216198	-0.866732	0
-0.216198	-0.36064	0
-0.216198	1.21336	0
-0.337331	3.11125	0
-0.337331	-0.307021	0
-0.337331	-0.710877	0
-0.337331	-0.685262	0
-0.337331	-0.324062	0
-0.337331	-0.12222	0
-0.337331	-0.34549	0
-0.337331	-0.192491	0
-0.337331	-0.364701	0
-0.337331	-0.593328	1
-0.337331	0.463412	1
-0.337331	-0.785907	1
-0.337331	-0.0871004	0
-0.337331	-0.347924	0
-0.337331	0.955422	0
-0.337331	-0.410348	0
-0.337331	-0.697891	0
-0.337331	-0.485386	0
-0.337331	1.92993	0
-0.0465902	3.11125	0
-0.0465902	-0.307021	0
-0.0465902	-0.710877	0
-0.0465902	-0.685262	0
-0.0465902	-0.324062	0
-0.0465902	-0.12222	1
-0.0465902	-0.34549	0
-0.0465902	-0.192491	0
-0.0465902	-0.364701	0
-0.0465902	-0.593328	0
-0.0465902	0.463412	0
-0.0465902	-0.785907	0
-0.0465902	-0.0871004	0
-0.0465902	-0.347924	0
-0.0465902	0.955422	0
-0.0465902	-0.410348	0
-0.0465902	-0.697891	0
-0.0465902	-0.485386	0
-0.0465902	1.92993	0
-0.43121	3.11125	0
-0.43121	-0.307021	0
-0.43121	-0.710877	0
-0.43121	-0.685262	0
-0.43121	-0.324062	0
-0.43121	-0.12222	1
-0.43121	-0.34549	0
-0.43121	-0.192491	0
-0.43121	-0.364701	0
-0.43121	-0.593328	0
-0.43121	0.463412	0
-0.43121	-0.785907	0
-0.43121	-0.0871004	0
-0.43121	-0.347924	0
-0.43121	0.955422	0
-0.43121	-0.410348	0
-0.43121	-0.697891	0
-0.43121	-0.485386	0
-0.43121	1.92993	0
-0.467588	3.11125	0
-0.467588	-0.307021	0
-0.467588	-0.710877	0
-0.467588	-0.685262	0
-0.467588	-0.324062	0
-0.467588	-0.12222	0
-0.467588	-0.34549	0
-0.467588	-0.192491	0
-0.467588	-0.364701	0
-0.467588	-0.593328	1
-0.467588	0.463412	1
-0.467588	-0.785907	0
-0.467588	-0.0871004	0
-0.467588	-0.347924	0
-0.467588	0.955422	0
-0.467588	-0.410348	0
-0.467588	-0.697891	0
-0.467588	-0.485386	0
-0.467588	1.92993	0
-0.269463	3.11125	0
-0.269463	-0.307021	0
-0.269463	-0.710877	0
-0.269463	-0.685262	0
-0.269463	-0.324062	0
-0.269463	-0.12222	0
-0.269463	-0.34549	0
-0.269463	-0.192491	1
-0.269463	-0.364701	0
-0.269463	-0.593328	0
-0.269463	0.463412	0
-0.269463	-0.785907	0
-0.269463	-0.0871004	0
-0.269463	-0.347924	0
-0.269463	0.955422	0
-0.269463	-0.410348	0
-0.269463	-0.697891	0
-0.269463	-0.485386	0
-0.269463	1.92993	0
-0.380731	3.11125	0
-0.380731	-0.307021	0
-0.380731	-0.710877	0
-0.380731	-0.685262	0
-0.380731	-0.324062	0
-0.380731	-0.12222	0
-0.380731	-0.34549	0
-0.380731	-0.192491	0
-0.380731	-0.364701	0
-0.380731	-0.593328	0
-0.380731	0.463412	0
-0.380731	-0.785907	0
-0.380731	-0.0871004	0
-0.380731	-0.347924	0
-0.380731	0.955422	0
-0.380731	-0.410348	0
-0.380731	-0.697891	0
-0.380731	-0.485386	0
-0.380731	1.92993	0
-0.627719	3.11125	0
-0.627719	-0.307021	0
-0.627719	-0.710877	0
-0.627719	-0.685262	0
-0.627719	-0.324062	0
-0.627719	-0.12222	0
-0.627719	-0.34549	0
-0.627719	-0.192491	0
-0.627719	-0.364701	0
-0.627719	-0.593328	0
-0.627719	0.463412	0
-0.627719	-0.785907	0
-0.627719	-0.0871004	0
-0.627719	-0.347924	0
-0.627719	0.955422	0
-0.627719	-0.410348	0
-0.627719	-0.697891	0
-0.627719	-0.485386	0
-0.627719	1.92993	0
3.57886	3.11125	1
3.57886	-0.307021	0
3.57886	-0.710877	0
3.57886	-0.685262	0
3.57886	-0.324062	0
3.57886	-0.12222	0
3.57886	-0.34549	0
3.57886	-0.192491	0
3.57886	-0.364701	0
3.57886	-0.593328	0
3.57886	0.463412	0
3.57886	-0.785907	0
3.57886	-0.0871004	0
3.57886	-0.347924	0
3.57886	0.955422	0
3.57886	-0.410348	0
3.57886	-0.697891	0
3.57886	-0.485386	0
3.57886	1.92993	0
-0.425965	3.11125	0
-0.425965	-0.307021	1
-0.425965	-0.710877	1
-0.425965	-0.685262	0
-0.425965	-0.324062	0
-0.425965	-0.12222	0
-0.425965	-0.34549	0
-0.425965	-0.192491	0
-0.425965	-0.364701	0
-0.425965	-0.593328	0
-0.425965	0.463412	0
-0.425965	-0.785907	0
-0.425965	-0.0871004	0
-0.425965	-0.347924	0
-0.425965	0.955422	0
-0.425965	-0.410348	0
-0.425965	-0.697891	0
-0.425965	-0.485386	0
-0.425965	1.92993	0
0.131323	3.11125	0
0.131323	-0.307021	0
0.131323	-0.710877	0
0.131323	-0.685262	0
0.131323	-0.324062	0
0.131323	-0.12222	0
0.131323	-0.34549	0
0.131323	-0.192491	0
0.131323	-0.364701	0
0.131323	-0.593328	0
0.131323	0.463412	0
0.131323	-0.785907	0
0.131323	-0.0871004	0
0.131323	-0.347924	0
0.131323	0.955422	0
0.131323	-0.410348	0
0.131323	-0.697891	0
0.131323	-0.485386	0
0.131323	1.92993	0
0.170925	3.11125	0
0.170925	-0.307021	0
0.170925	-0.710877	0
0.170925	-0.685262	1
0.170925	-0.324062	0
0.170925	-0.12222	0
0.170925	-0.34549	0
0.170925	-0.192491	0
0.170925	-0.364701	0
0.170925	-0.593328	0
0.170925	0.463412	0
0.170925	-0.785907	0
0.170925	-0.0871004	0
0.170925	-0.347924	0
0.170925	0.955422	0
0.170925	-0.410348	0
0.170925	-0.697891	0
0.170925	-0.485386	0
0.170925	1.92993	0
-0.405507	3.11125	0
-0.405507	-0.307021	0
-0.405507	-0.710877	0
-0.405507	-0.685262	0
-0.405507	-0.324062	0
-0.405507	-0.12222	0
-0.405507	-0.34549	0
-0.405507	-0.192491	0
-0.405507	-0.364701	0
-0.405507	-0.593328	0
-0.405507	0.463412	0
-0.405507	-0.785907	0
-0.405507	-0.0871004	0
-0.405507	-0.347924	0
-0.405507	0.955422	1
-0.405507	-0.410348	0
-0.405507	-0.697891	0
-0.405507	-0.485386	0
-0.405507	1.92993	0
-0.367265	3.11125	0
-0.367265	-0.307021	0
-0.367265	-0.710877	0
-0.367265	-0.685262	0
-0.367265	-0.324062	0
-0.367265	-0.12222	0
-0.367265	-0.34549	0
-0.367265	-0.192491	0
-0.367265	-0.364701	0
-0.367265	-0.593328	0
-0.367265	0.463412	0
-0.367265	-0.785907	0
-0.367265	-0.0871004	0
-0.367265	-0.347924	0
-0.367265	0.955422	0
-0.367265	-0.410348	0
-0.367265	-0.697891	0
-0.367265	-0.485386	0
-0.367265	1.92993	0
-0.42915	3.11125	0
-0.42915	-0.307021	0
-0.42915	-0.710877	0
-0.42915	-0.685262	0
-0.42915	-0.324062	0
-0.42915	-0.12222	0
-0.42915	-0.34549	0
-0.42915	-0.192491	0
-0.42915	-0.364701	0
-0.42915	-0.593328	0
-0.42915	0.463412	0
-0.42915	-0.785907	0
-0.42915	-0.0871004	1
-0.42915	-0.347924	0
-0.42915	0.955422	0
-0.42915	-0.410348	0
-0.42915	-0.697891	0
-0.42915	-0.485386	0
-0.42915	1.92993	0
-0.225163	3.11125	0
-0.225163	-0.307021	0
-0.225163	-0.710877	0
-0.225163	-0.685262	0
-0.225163	-0.324062	1
-0.225163	-0.12222	0
-0.225163	-0.34549	0
-0.225163	-0.192491	0
-0.225163	-0.364701	0
-0.225163	-0.593328	0
-0.225163	0.463412	0
-0.225163	-0.785907	0
-0.225163	-0.0871004	0
-0.225163	-0.347924	0
-0.225163	0.955422	0
-0.225163	-0.410348	0
-0.225163	-0.697891	0
-0.225163	-0.485386	0
-0.225163	1.92993	0
1.68848	3.11125	1
1.68848	-0.307021	0
1.68848	-0.710877	0
1.68848	-0.685262	0
1.68848	-0.324062	0
1.68848	-0.12222	0
1.68848	-0.34549	0
1.68848	-0.192491	0
1.68848	-0.364701	0
1.68848	-0.593328	0
1.68848	0.463412	0
1.68848	-0.785907	0
1.68848	-0.0871004	0
1.68848	-0.347924	0
1.68848	0.955422	0
1.68848	-0.410348	0
1.68848	-0.697891	0
1.68848	-0.485386	0
1.68848	1.92993	0
-0.377612	3.11125	0
-0.377612	-0.307021	0
-0.377612	-0.710877	0
-0.377612	-0.685262	0
-0.377612	-0.324062	0
-0.377612	-0.12222	0
-0.377612	-0.34549	0
-0.377612	-0.192491	0
-0.377612	-0.364701	0
-0.377612	-0.593328	0
-0.377612	0.463412	0
-0.377612	-0.785907	0
-0.377612	-0.0871004	1
-0.377612	-0.347924	0
-0.377612	0.955422	0
-0.377612	-0.410348	0
-0.377612	-0.697891	0
-0.377612	-0.485386	0
-0.377612	1.92993	0
-0.412675	3.11125	0
-0.412675	-0.307021	0
-0.412675	-0.710877	0
-0.412675	-0.685262	1
-0.412675	-0.324062	0
-0.412675	-0.12222	0
-0.412675	-0.34549	1
-0.412675	-0.192491	0
-0.412675	-0.364701	0
-0.412675	-0.593328	0
-0.412675	0.463412	0
-0.412675	-0.785907	0
-0.412675	-0.0871004	0
-0.412675	-0.347924	0
-0.412675	0.955422	0
-0.412675	-0.410348	0
-0.412675	-0.697891	0
-0.412675	-0.485386	0
-0.412675	1.92993	0
-0.365616	3.11125	0
-0.365616	-0.307021	0
-0.365616	-0.710877	0
-0.365616	-0.685262	0
-0.365616	-0.324062	0
-0.365616	-0.12222	0
-0.365616	-0.34549	0
-0.365616	-0.192491	0
-0.365616	-0.364701	0
-0.365616	-0.593328	0
-0.365616	0.463412	0
-0.365616	-0.785907	0
-0.365616	-0.0871004	0
-0.365616	-0.347924	1
-0.365616	0.955422	0
-0.365616	-0.410348	0
-0.365616	-0.697891	0
-0.365616	-0.485386	0
-0.365616	1.92993	0
0.453619	-0.50358	0
0.453619	-0.458373	0
0.453619	-0.448714	0
0.453619	-0.52386	0
0.453619	-0.450429	0
0.453619	-0.529958	0
0.453619	-0.522005	0
0.453619	-0.522127	0
0.453619	-0.511743	0
0.453619	-0.531575	1
0.453619	-0.527935	1
0.453619	-0.529354	1
0.453619	-0.46246	0
0.453619	0.227912	0
0.453619	1.78021	0
0.453619	2.93347	0
0.453619	1.58814	0
0.453619	-0.431513	0
0.453619	0.423895	0
-0.565378	-0.50358	0
-0.565378	-0.458373	0
-0.565378	-0.448714	0
-0.565378	-0.52386	0
-0.565378	-0.450429	0
-0.565378	-0.529958	1
-0.565378	-0.522005	0
-0.565378	-0.522127	0
-0.565378	-0.511743	0
-0.565378	-0.531575	0
-0.565378	-0.527935	0
-0.565378	-0.529354	0
-0.565378	-0.46246	0
-0.565378	0.227912	0
-0.565378	1.78021	0
-0.565378	2.93347	0
-0.565378	1.58814	0
-0.565378	-0.431513	0
-0.565378	0.423895	0
-0.569632	-0.50358	0
-0.569632	-0.458373	0
-0.569632	-0.448714	0
-0.569632	-0.52386	0
-0.569632	-0.450429	0
-0.569632	-0.529958	1
-0.569632	-0.522005	0
-0.569632	-0.522127	0
-0.569632	-0.511743	0
-0.569632	-0.531575	0
-0.569632	-0.527935	0
-0.569632	-0.529354	0
-0.569632	-0.46246	0
-0.569632	0.227912	0
-0.569632	1.78021	0
-0.569632	2.93347	0
-0.569632	1.58814	0
-0.569632	-0.431513	0
-0.569632	0.423895	0
0.259591	-0.50358	0
0.259591	-0.458373	0
0.259591	-0.448714	0
0.259591	-0.52386	0
0.259591	-0.450429	0
0.259591	-0.529958	0
0.259591	-0.522005	0
0.259591	-0.522127	0
0.259591	-0.511743	0
0.259591	-0.531575	1
0.259591	-0.527935	1
0.259591	-0.529354	0
0.259591	-0.46246	0
0.259591	0.227912	0
0.259591	1.78021	0
0.259591	2.93347	0
0.259591	1.58814	0
0.259591	-0.431513	0
0.259591	0.423895	0
-0.385224	-0.50358	0
-0.385224	-0.458373	0
-0.385224	-0.448714	0
-0.385224	-0.52386	0
-0.385224	-0.450429	0
-0.385224	-0.529958	0
-0.385224	-0.522005	0
-0.385224	-0.522127	1
-0.385224	-0.511743	0
-0.385224	-0.531575	0
-0.385224	-0.527935	0
-0.385224	-0.529354	0
-0.385224	-0.46246	0
-0.385224	0.227912	0
-0.385224	1.78021	0
-0.385224	2.93347	0
-0.385224	1.58814	0
-0.385224	-0.431513	0
-0.385224	0.423895	0
0.314002	-0.50358	0
0.314002	-0.458373	0
0.314002	-0.448714	0
0.314002	-0.52386	0
0.314002	-0.450429	0
0.314002	-0.529958	0
0.314002	-0.522005	0
0.314002	-0.522127	0
0.314002	-0.511743	0
0.314002	-0.531575	0
0.314002	-0.527935	0
0.314002	-0.529354	0
0.314002	-0.46246	0
0.314002	0.227912	0
0.314002	1.78021	0
0.314002	2.93347	0
0.314002	1.58814	0
0.314002	-0.431513	0
0.314002	0.423895	0
-0.507843	-0.50358	0
-0.507843	-0.458373	0
-0.507843	-0.448714	0
-0.507843	-0.52386	0
-0.507843	-0.450429	0
-0.507843	-0.529958	0
-0.507843	-0.522005	0
-0.507843	-0.522127	0
-0.507843	-0.511743	0
-0.507843	-0.531575	0
-0.507843	-0.527935	0
-0.507843	-0.529354	0
-0.507843	-0.46246	0
-0.507843	0.227912	0
-0.507843	1.78021	0
-0.507843	2.93347	0
-0.507843	1.58814	0
-0.507843	-0.431513	0
-0.507843	0.423895	0
-0.540673	-0.50358	1
-0.540673	-0.458373	0
-0.540673	-0.448714	0
-0.540673	-0.52386	0
-0.540673	-0.450429	0
-0.540673	-0.529958	0
-0.540673	-0.522005	0
-0.540673	-0.522127	0
-0.540673	-0.511743	0
-0.540673	-0.531575	0
-0.540673	-0.527935	0
-0.540673	-0.529354	0
-0.540673	-0.46246	0
-0.540673	0.227912	0
-0.540673	1.78021	0
-0.540673	2.93347	0
-0.540673	1.58814	0
-0.540673	-0.431513	0
-0.540673	0.423895	0
-0.397332	-0.50358	0
-0.397332	-0.458373	1
-0.397332	-0.448714	1
-0.397332	-0.52386	0
-0.397332	-0.450429	0
-0.397332	-0.529958	0
-0.397332	-0.522005	0
-0.397332	-0.522127	0
-0.397332	-0.511743	0
-0.397332	-0.531575	0
-0.397332	-0.527935	0
-0.397332	-0.529354	0
-0.397332	-0.46246	0
-0.397332	0.227912	0
-0.397332	1.78021	0
-0.397332	2.93347	0
-0.397332	1.58814	0
-0.397332	-0.431513	0
-0.397332	0.423895	0
-0.494704	-0.50358	0
-0.494704	-0.458373	0
-0.494704	-0.448714	0
-0.494704	-0.52386	0
-0.494704	-0.450429	0
-0.494704	-0.529958	0
-0.494704	-0.522005	0
-0.494704	-0.522127	0
-0.494704	-0.511743	0
-0.494704	-0.531575	0
-0.494704	-0.527935	0
-0.494704	-0.529354	0
-0.494704	-0.46246	0
-0.494704	0.227912	0
-0.494704	1.78021	0
-0.494704	2.93347	0
-0.494704	1.58814	0
-0.494704	-0.431513	0
-0.494704	0.423895	0
-0.568371	-0.50358	0
-0.568371	-0.458373	0
-0.568371	-0.448714	0
-0.568371	-0.52386	1
-0.568371	-0.450429	0
-0.568371	-0.529958	0
-0.568371	-0.522005	0
-0.568371	-0.522127	0
-0.568371	-0.511743	0
-0.568371	-0.531575	0
-0.568371	-0.527935	0
-0.568371	-0.529354	0
-0.568371	-0.46246	0
-0.568371	0.227912	0
-0.568371	1.78021	0
-0.568371	2.93347	0
-0.568371	1.58814	0
-0.568371	-0.431513	0
-0.568371	0.423895	0
3.52851	-0.50358	0
3.52851	-0.458373	0
3.52851	-0.448714	0
3.52851	-0.52386	0
3.52851	-0.450429	0
3.52851	-0.529958	0
3.52851	-0.522005	0
3.52851	-0.522127	0
3.52851	-0.511743	0
3.52851	-0.531575	0
3.52851	-0.527935	0
3.52851	-0.529354	0
3.52851	-0.46246	0
3.52851	0.227912	0
3.52851	1.78021	1
3.52851	2.93347	0
3.52851	1.58814	0
3.52851	-0.431513	0
3.52851	0.423895	0
-0.514077	-0.50358	0
-0.514077	-0.458373	0
-0.514077	-0.448714	0
-0.514077	-0.52386	0
-0.514077	-0.450429	0
-0.514077	-0.529958	0
-0.514077	-0.522005	0
-0.514077	-0.522127	0
-0.514077	-0.511743	0
-0.514077	-0.531575	0
-0.514077	-0.527935	0
-0.514077	-0.529354	0
-0.514077	-0.46246	0
-0.514077	0.227912	0
-0.514077	1.78021	0
-0.514077	2.93347	0
-0.514077	1.58814	0
-0.514077	-0.431513	0
-0.514077	0.423895	0
0.255634	-0.50358	0
0.255634	-0.458373	0
0.255634	-0.448714	0
0.255634	-0.52386	0
0.255634	-0.450429	0
0.255634	-0.529958	0
0.255634	-0.522005	0
0.255634	-0.522127	0
0.255634	-0.511743	0
0.255634	-0.531575	0
0.255634	-0.527935	0
0.255634	-0.529354	0
0.255634	-0.46246	1
0.255634	0.227912	0
0.255634	1.78021	0
0.255634	2.93347	0
0.255634	1.58814	0
0.255634	-0.431513	0
0.255634	0.423895	0
-0.480124	-0.50358	0
-0.480124	-0.458373	0
-0.480124	-0.448714	0
-0.480124	-0.52386	0
-0.480124	-0.450429	1
-0.480124	-0.529958	0
-0.480124	-0.522005	0
-0.480124	-0.522127	0
-0.480124	-0.511743	0
-0.480124	-0.531575	0
-0.480124	-0.527935	0
-0.480124	-0.529354	0
-0.480124	-0.46246	0
-0.480124	0.227912	0
-0.480124	1.78021	0
-0.480124	2.93347	0
-0.480124	1.58814	0
-0.480124	-0.431513	0
-0.480124	0.423895	0
-0.498465	-0.50358	1
-0.498465	-0.458373	0
-0.498465	-0.448714	0
-0.498465	-0.52386	0
-0.498465	-0.450429	0
-0.498465	-0.529958	0
-0.498465	-0.522005	0
-0.498465	-0.522127	0
-0.498465	-0.511743	0
-0.498465	-0.531575	0
-0.498465	-0.527935	0
-0.498465	-0.529354	0
-0.498465	-0.46246	0
-0.498465	0.227912	0
-0.498465	1.78021	0
-0.498465	2.93347	0
-0.498465	1.58814	0
-0.498465	-0.431513	0
-0.498465	0.423895	0
-0.146995	-0.50358	0
-0.146995	-0.458373	0
-0.146995	-0.448714	0
-0.146995	-0.52386	0
-0.146995	-0.450429	0
-0.146995	-0.529958	0
-0.146995	-0.522005	0
-0.146995	-0.522127	0
-0.146995	-0.511743	0
-0.146995	-0.531575	0
-0.146995	-0.527935	0
-0.146995	-0.529354	0
-0.146995	-0.46246	1
-0.146995	0.227912	0
-0.146995	1.78021	0
-0.146995	2.93347	0
-0.146995	1.58814	0
-0.146995	-0.431513	0
-0.146995	0.423895	0
-0.548918	-0.50358	0
-0.548918	-0.458373	0
-0.548918	-0.448714	0
-0.548918	-0.52386	1
-0.548918	-0.450429	0
-0.548918	-0.529958	0
-0.548918	-0.522005	1
-0.548918	-0.522127	0
-0.548918	-0.511743	0
-0.548918	-0.531575	0
-0.548918	-0.527935	0
-0.548918	-0.529354	0
-0.548918	-0.46246	0
-0.548918	0.227912	0
-0.548918	1.78021	0
-0.548918	2.93347	0
-0.548918	1.58814	0
-0.548918	-0.431513	0
-0.548918	0.423895	0
1.40638	-0.50358	0
1.40638	-0.458373	0
1.40638	-0.448714	0
1.40638	-0.52386	0
1.40638	-0.450429	0
1.40638	-0.529958	0
1.40638	-0.522005	0
1.40638	-0.522127	0
1.40638	-0.511743	0
1.40638	-0.531575	0
1.40638	-0.527935	0
1.40638	-0.529354	0
1.40638	-0.46246	0
1.40638	0.227912	1
1.40638	1.78021	0
1.40638	2.93347	0
1.40638	1.58814	0
1.40638	-0.431513	0
1.40638	0.423895	0
-0.245714	-0.847323	0
-0.245714	-0.270806	0
-0.245714	-0.25045	0
-0.245714	-0.696338	0
-0.245714	-0.385089	0
-0.245714	-0.453309	0
-0.245714	-0.360417	0
-0.245714	0.747746	0
-0.245714	0.0826105	0
-0.245714	0.255493	1
-0.245714	-0.0808365	1
-0.245714	-0.18078	1
-0.245714	-0.213661	0
-0.245714	-0.172068	0
-0.245714	-0.306794	0
-0.245714	-0.270632	0
-0.245714	-0.120717	0
-0.245714	-0.375424	0
-0.245714	-0.281934	0
-0.267194	-0.847323	0
-0.267194	-0.270806	0
-0.267194	-0.25045	0
-0.267194	-0.696338	0
-0.267194	-0.385089	0
-0.267194	-0.453309	1
-0.267194	-0.360417	0
-0.267194	0.747746	0
-0.267194	0.0826105	0
-0.267194	0.255493	0
-0.267194	-0.0808365	0
-0.267194	-0.18078	0
-0.267194	-0.213661	0
-0.267194	-0.172068	0
-0.267194	-0.306794	0
-0.267194	-0.270632	0
-0.267194	-0.120717	0
-0.267194	-0.375424	0
-0.267194	-0.281934	0
-0.215247	-0.847323	0
-0.215247	-0.270806	0
-0.215247	-0.25045	0
-0.215247	-0.696338	0
-0.215247	-0.385089	0
-0.215247	-0.453309	1
-0.215247	-0.360417	0
-0.215247	0.747746	0
-0.215247	0.0826105	0
-0.215247	0.255493	0
-0.215247	-0.0808365	0
-0.215247	-0.18078	0
-0.215247	-0.213661	0
-0.215247	-0.172068	0
-0.215247	-0.306794	0
-0.215247	-0.270632	0
-0.215247	-0.120717	0
-0.215247	-0.375424	0
-0.215247	-0.281934	0
0.0414231	-0.847323	0
0.0414231	-0.270806	0
0.0414231	-0.25045	0
0.0414231	-0.696338	0
0.0414231	-0.385089	0
0.0414231	-0.453309	0
0.0414231	-0.360417	0
0.0414231	0.747746	0
0.0414231	0.0826105	0
0.0414231	0.255493	1
0.0414231	-0.0808365	1
0.0414231	-0.18078	0
0.0414231	-0.213661	0
0.0414231	-0.172068	0
0.0414231	-0.306794	0
0.0414231	-0.270632	0
0.0414231	-0.120717	0
0.0414231	-0.375424	0
0.0414231	-0.281934	0
-0.047164	-0.847323	0
-0.047164	-0.270806	0
-0.047164	-0.25045	0
-0.047164	-0.696338	0
-0.047164	-0.385089	0
-0.047164	-0.453309	0
-0.047164	-0.360417	0
-0.047164	0.747746	1
-0.047164	0.0826105	0
-0.047164	0.255493	0
-0.047164	-0.0808365	0
-0.047164	-0.18078	0
-0.047164	-0.213661	0
-0.047164	-0.172068	0
-0.047164	-0.306794	0
-0.047164	-0.270632	0
-0.047164	-0.120717	0
-0.047164	-0.375424	0
-0.047164	-0.281934	0
-0.0766059	-0.847323	0
-0.0766059	-0.270806	0
-0.0766059	-0.25045	0
-0.0766059	-0.696338	0
-0.0766059	-0.385089	0
-0.0766059	-0.453309	0
-0.0766059	-0.360417	0
-0.0766059	0.747746	0
-0.0766059	0.0826105	0
-0.0766059	0.255493	0
-0.0766059	-0.0808365	0
-0.0766059	-0.18078	0
-0.0766059	-0.213661	0
-0.0766059	-0.172068	0
-0.0766059	-0.306794	0
-0.0766059	-0.270632	0
-0.0766059	-0.120717	0
-0.0766059	-0.375424	0
-0.0766059	-0.281934	0
-1.6095	-0.847323	0
-1.6095	-0.270806	0
-1.6095	-0.25045	0
-1.6095	-0.696338	0
-1.6095	-0.385089	0
-1.6095	-0.453309	0
-1.6095	-0.360417	0
-1.6095	0.747746	0
-1.6095	0.0826105	0
-1.6095	0.255493	0
-1.6095	-0.0808365	0
-1.6095	-0.18078	0
-1.6095	-0.213661	0
-1.6095	-0.172068	0
-1.6095	-0.306794	0
-1.6095	-0.270632	0
-1.6095	-0.120717	0
-1.6095	-0.375424	0
-1.6095	-0.281934	0
-0.398624	-0.847323	1
-0.398624	-0.270806	0
-0.398624	-0.25045	0
-0.398624	-0.696338	0
-0.398624	-0.385089	0
-0.398624	-0.453309	0
-0.398624	-0.360417	0
-0.398624	0.747746	0
-0.398624	0.0826105	0
-0.398624	0.255493	0
-0.398624	-0.0808365	0
-0.398624	-0.18078	0
-0.398624	-0.213661	0
-0.398624	-0.172068	0
-0.398624	-0.306794	0
-0.398624	-0.270632	0
-0.398624	-0.120717	0
-0.398624	-0.375424	0
-0.398624	-0.281934	0
0.0473629	-0.847323	0
0.0473629	-0.270806	1
0.0473629	-0.25045	1
0.0473629	-0.696338	0
0.0473629	-0.385089	0
0.0473629	-0.453309	0
0.0473629	-0.360417	0
0.0473629	0.747746	0
0.0473629	0.0826105	0
0.0473629	0.255493	0
0.0473629	-0.0808365	0
0.0473629	-0.18078	0
0.0473629	-0.213661	0
0.0473629	-0.172068	0
0.0473629	-0.306794	0
0.0473629	-0.270632	0
0.0473629	-0.120717	0
0.0473629	-0.375424	0
0.0473629	-0.281934	0
-0.125528	-0.847323	0
-0.125528	-0.270806	0
-0.125528	-0.25045	0
-0.125528	-0.696338	0
-0.125528	-0.385089	0
-0.125528	-0.453309	0
-0.125528	-0.360417	0
-0.125528	0.747746	0
-0.125528	0.0826105	0
-0.125528	0.255493	0
-0.125528	-0.0808365	0
-0.125528	-0.18078	0
-0.125528	-0.213661	0
-0.125528	-0.172068	0
-0.125528	-0.306794	0
-0.125528	-0.270632	0
-0.125528	-0.120717	0
-0.125528	-0.375424	0
-0.125528	-0.281934	0
-0.180727	-0.847323	0
-0.180727	-0.270806	0
-0.180727	-0.25045	0
-0.180727	-0.696338	1
-0.180727	-0.385089	0
-0.180727	-0.453309	0
-0.180727	-0.360417	0
-0.180727	0.747746	0
-0.180727	0.0826105	0
-0.180727	0.255493	0
-0.180727	-0.0808365	0
-0.180727	-0.18078	0
-0.180727	-0.213661	0
-0.180727	-0.172068	0
-0.180727	-0.306794	0
-0.180727	-0.270632	0
-0.180727	-0.120717	0
-0.180727	-0.375424	0
-0.180727	-0.281934	0
-0.186174	-0.847323	0
-0.186174	-0.270806	0
-0.186174	-0.25045	0
-0.186174	-0.696338	0
-0.186174	-0.385089	0
-0.186174	-0.453309	0
-0.186174	-0.360417	0
-0.186174	0.747746	0
-0.186174	0.0826105	0
-0.186174	0.255493	0
-0.186174	-0.0808365	0
-0.186174	-0.18078	0
-0.186174	-0.213661	0
-0.186174	-0.172068	0
-0.186174	-0.306794	1
-0.186174	-0.270632	0
-0.186174	-0.120717	0
-0.186174	-0.375424	0
-0.186174	-0.281934	0
-0.563292	-0.847323	0
-0.563292	-0.270806	0
-0.563292	-0.25045	0
-0.563292	-0.696338	0
-0.563292	-0.385089	0
-0.563292	-0.453309	0
-0.563292	-0.360417	0
-0.563292	0.747746	0
-0.563292	0.0826105	0
-0.563292	0.255493	0
-0.563292	-0.0808365	0
-0.563292	-0.18078	0
-0.563292	-0.213661	0
-0.563292	-0.172068	0
-0.563292	-0.306794	0
-0.563292	-0.270632	0
-0.563292	-0.120717	0
-0.563292	-0.375424	0
-0.563292	-0.281934	0
0.133812	-0.847323	0
0.133812	-0.270806	0
0.133812	-0.25045	0
0.133812	-0.696338	0
0.133812	-0.385089	0
0.133812	-0.453309	0
0.133812	-0.360417	0
0.133812	0.747746	0
0.133812	0.0826105	0
0.133812	0.255493	0
0.133812	-0.0808365	0
0.133812	-0.18078	0
0.133812	-0.213661	1
0.133812	-0.172068	0
0.133812	-0.306794	0
0.133812	-0.270632	0
0.133812	-0.120717	0
0.133812	-0.375424	0
0.133812	-0.281934	0
-0.107675	-0.847323	0
-0.107675	-0.270806	0
-0.107675	-0.25045	0
-0.107675	-0.696338	0
-0.107675	-0.385089	1
-0.107675	-0.453309	0
-0.107675	-0.360417	0
-0.107675	0.747746	0
-0.107675	0.0826105	0
-0.107675	0.255493	0
-0.107675	-0.0808365	0
-0.107675	-0.18078	0
-0.107675	-0.213661	0
-0.107675	-0.172068	0
-0.107675	-0.306794	0
-0.107675	-0.270632	0
-0.107675	-0.120717	0
-0.107675	-0.375424	0
-0.107675	-0.281934	0
-0.515426	-0.847323	1
-0.515426	-0.270806	0
-0.515426	-0.25045	0
-0.515426	-0.696338	0
-0.515426	-0.385089	0
-0.515426	-0.453309	0
-0.515426	-0.360417	0
-0.515426	0.747746	0
-0.515426	0.0826105	0
-0.515426	0.255493	0
-0.515426	-0.0808365	0
-0.515426	-0.18078	0
-0.515426	-0.213661	0
-0.515426	-0.172068	0
-0.515426	-0.306794	0
-0.515426	-0.270632	0
-0.515426	-0.120717	0
-0.515426	-0.375424	0
-0.515426	-0.281934	0
0.0951926	-0.847323	0
0.0951926	-0.270806	0
0.0951926	-0.25045	0
0.0951926	-0.696338	0
0.0951926	-0.385089	0
0.0951926	-0.453309	0
0.0951926	-0.360417	0
0.0951926	0.747746	0
0.0951926	0.0826105	0
0.0951926	0.255493	0
0.0951926	-0.0808365	0
0.0951926	-0.18078	0
0.0951926	-0.213661	1
0.0951926	-0.172068	0
0.0951926	-0.306794	0
0.0951926	-0.270632	0
0.0951926	-0.120717	0
0.0951926	-0.375424	0
0.0951926	-0.281934	0
0.233879	-0.847323	0
0.233879	-0.270806	0
0.233879	-0.25045	0
0.233879	-0.696338	1
0.233879	-0.385089	0
0.233879	-0.453309	0
0.233879	-0.360417	1
0.233879	0.747746	0
0.233879	0.0826105	0
0.233879	0.255493	0
0.233879	-0.0808365	0
0.233879	-0.18078	0
0.233879	-0.213661	0
0.233879	-0.172068	0
0.233879	-0.306794	0
0.233879	-0.270632	0
0.233879	-0.120717	0
0.233879	-0.375424	0
0.233879	-0.281934	0
-0.290039	-0.847323	0
-0.290039	-0.270806	0
-0.290039	-0.25045	0
-0.290039	-0.696338	0
-0.290039	-0.385089	0
-0.290039	-0.453309	0
-0.290039	-0.360417	0
-0.290039	0.747746	0
-0.290039	0.0826105	0
-0.290039	0.255493	0
-0.290039	-0.0808365	0
-0.290039	-0.18078	0
-0.290039	-0.213661	0
-0.290039	-0.172068	1
-0.290039	-0.306794	0
-0.290039	-0.270632	0
-0.290039	-0.120717	0
-0.290039	-0.375424	0
-0.290039	-0.281934	0
-0.179214	-0.621079	0
-0.179214	0.847459	0
-0.179214	-0.905634	0
-0.179214	-1.07006	0
-0.179214	-0.831109	0
-0.179214	0.0400151	0
-0.179214	-0.312148	0
-0.179214	0.309629	0
-0.179214	-0.68968	0
-0.179214	0.734614	1
-0.179214	0.571493	1
-0.179214	-0.536532	1
-0.179214	0.519431	0
-0.179214	0.131038	0
-0.179214	-1.28503	0
-0.179214	-0.284945	0
-0.179214	0.375411	0
-0.179214	-0.189593	0
-0.179214	3.19673	0
0.0113809	-0.621079	0
0.0113809	0.847459	0
0.0113809	-0.905634	0
0.0113809	-1.07006	0
0.0113809	-0.831109	0
0.0113809	0.0400151	1
0.0113809	-0.312148	0
0.0113809	0.309629	0
0.0113809	-0.68968	0
0.0113809	0.734614	0
0.0113809	0.571493	0
0.0113809	-0.536532	0
0.0113809	0.519431	0
0.0113809	0.131038	0
0.0113809	-1.28503	0
0.0113809	-0.284945	0
0.0113809	0.375411	0
0.0113809	-0.189593	0
0.0113809	3.19673	0
-0.421817	-0.621079	0
-0.421817	0.847459	0
-0.421817	-0.905634	0
-0.421817	-1.07006	0
-0.421817	-0.831109	0
-0.421817	0.0400151	1
-0.421817	-0.312148	0
-0.421817	0.309629	0
-0.421817	-0.68968	0
-0.421817	0.734614	0
-0.421817	0.571493	0
-0.421817	-0.536532	0
-0.421817	0.519431	0
-0.421817	0.131038	0
-0.421817	-1.28503	0
-0.421817	-0.284945	0
-0.421817	0.375411	0
-0.421817	-0.189593	0
-0.421817	3.19673	0
-0.593897	-0.621079	0
-0.593897	0.847459	0
-0.593897	-0.905634	0
-0.593897	-1.07006	0
-0.593897	-0.831109	0
-0.593897	0.0400151	0
-0.593897	-0.312148	0
-0.593897	0.309629	0
-0.593897	-0.68968	0
-0.593897	0.734614	1
-0.593897	0.571493	1
-0.593897	-0.536532	0
-0.593897	0.519431	0
-0.593897	0.131038	0
-0.593897	-1.28503	0
-0.593897	-0.284945	0
-0.593897	0.375411	0
-0.593897	-0.189593	0
-0.593897	3.19673	0
1.55185	-0.621079	0
1.55185	0.847459	0
1.55185	-0.905634	0
1.55185	-1.07006	0
1.55185	-0.831109	0
1.55185	0.0400151	0
1.55185	-0.312148	0
1.55185	0.309629	1
1.55185	-0.68968	0
1.55185	0.734614	0
1.55185	0.571493	0
1.55185	-0.536532	0
1.55185	0.519431	0
1.55185	0.131038	0
1.55185	-1.28503	0
1.55185	-0.284945	0
1.55185	0.375411	0
1.55185	-0.189593	0
1.55185	3.19673	0
-0.185329	-0.621079	0
-0.185329	0.847459	0
-0.185329	-0.905634	0
-0.185329	-1.07006	0
-0.185329	-0.831109	0
-0.185329	0.0400151	0
-0.185329	-0.312148	0
-0.185329	0.309629	0
-0.185329	-0.68968	0
-0.185329	0.734614	0
-0.185329	0.571493	0
-0.185329	-0.536532	0
-0.185329	0.519431	0
-0.185329	0.131038	0
-0.185329	-1.28503	0
-0.185329	-0.284945	0
-0.185329	0.375411	0
-0.185329	-0.189593	0
-0.185329	3.19673	0
-1.88912	-0.621079	0
-1.88912	0.847459	0
-1.88912	-0.905634	0
-1.88912	-1.07006	0
-1.88912	-0.831109	0
-1.88912	0.0400151	0
-1.88912	-0.312148	0
-1.88912	0.309629	0
-1.88912	-0.68968	0
-1.88912	0.734614	0
-1.88912	0.571493	0
-1.88912	-0.536532	0
-1.88912	0.519431	0
-1.88912	0.131038	0
-1.88912	-1.28503	0
-1.88912	-0.284945	0
-1.88912	0.375411	0
-1.88912	-0.189593	0
-1.88912	3.19673	0
-1.38659	-0.621079	1
-1.38659	0.847459	0
-1.38659	-0.905634	0
-1.38659	-1.07006	0
-1.38659	-0.831109	0
-1.38659	0.0400151	0
-1.38659	-0.312148	0
-1.38659	0.309629	0
-1.38659	-0.68968	0
-1.38659	0.734614	0
-1.38659	0.571493	0
-1.38659	-0.536532	0
-1.38659	0.519431	0
-1.38659	0.131038	0
-1.38659	-1.28503	0
-1.38659	-0.284945	0
-1.38659	0.375411	0
-1.38659	-0.189593	0
-1.38659	3.19673	0
1.53053	-0.621079	0
1.53053	0.847459	1
1.53053	-0.905634	1
1.53053	-1.07006	0
1.53053	-0.831109	0
1.53053	0.0400151	0
1.53053	-0.312148	0
1.53053	0.309629	0
1.53053	-0.68968	0
1.53053	0.734614	0
1.53053	0.571493	0
1.53053	-0.536532	0
1.53053	0.519431	0
1.53053	0.131038	0
1.53053	-1.28503	0
1.53053	-0.284945	0
1.53053	0.375411	0
1.53053	-0.189593	0
1.53053	3.19673	0
-0.502458	-0.621079	0
-0.502458	0.847459	0
-0.502458	-0.905634	0
-0.502458	-1.07006	0
-0.502458	-0.831109	0
-0.502458	0.0400151	0
-0.502458	-0.312148	0
-0.502458	0.309629	0
-0.502458	-0.68968	0
-0.502458	0.734614	0
-0.502458	0.571493	0
-0.502458	-0.536532	0
-0.502458	0.519431	0
-0.502458	0.131038	0
-0.502458	-1.28503	0
-0.502458	-0.284945	0
-0.502458	0.375411	0
-0.502458	-0.189593	0
-0.502458	3.19673	0
0.763479	-0.621079	0
0.763479	0.847459	0
0.763479	-0.905634	0
0.763479	-1.07006	1
0.763479	-0.831109	0
0.763479	0.0400151	0
0.763479	-0.312148	0
0.763479	0.309629	0
0.763479	-0.68968	0
0.763479	0.734614	0
0.763479	0.571493	0
0.763479	-0.536532	0
0.763479	0.519431	0
0.763479	0.131038	0
0.763479	-1.28503	0
0.763479	-0.284945	0
0.763479	0.375411	0
0.763479	-0.189593	0
0.763479	3.19673	0
0.503434	-0.621079	0
0.503434	0.847459	0
0.503434	-0.905634	0
0.503434	-1.07006	0
0.503434	-0.831109	0
0.503434	0.0400151	0
0.503434	-0.312148	0
0.503434	0.309629	0
0.503434	-0.68968	0
0.503434	0.734614	0
0.503434	0.571493	0
0.503434	-0.536532	0
0.503434	0.519431	0
0.503434	0.131038	0
0.503434	-1.28503	1
0.503434	-0.284945	0
0.503434	0.375411	0
0.503434	-0.189593	0
0.503434	3.19673	0
0.282408	-0.621079	0
0.282408	0.847459	0
0.282408	-0.905634	0
0.282408	-1.07006	0
0.282408	-0.831109	0
0.282408	0.0400151	0
0.282408	-0.312148	0
0.282408	0.309629	0
0.282408	-0.68968	0
0.282408	0.734614	0
0.282408	0.571493	0
0.282408	-0.536532	0
0.282408	0.519431	0
0.282408	0.131038	0
0.282408	-1.28503	0
0.282408	-0.284945	0
0.282408	0.375411	0
0.282408	-0.189593	0
0.282408	3.19673	0
-0.613297	-0.621079	0
-0.613297	0.847459	0
-0.613297	-0.905634	0
-0.613297	-1.07006	0
-0.613297	-0.831109	0
-0.613297	0.0400151	0
-0.613297	-0.312148	0
-0.613297	0.309629	0
-0.613297	-0.68968	0
-0.613297	0.734614	0
-0.613297	0.571493	0
-0.613297	-0.536532	0
-0.613297	0.519431	1
-0.613297	0.131038	0
-0.613297	-1.28503	0
-0.613297	-0.284945	0
-0.613297	0.375411	0
-0.613297	-0.189593	0
-0.613297	3.19673	0
0.541733	-0.621079	0
0.541733	0.847459	0
0.541733	-0.905634	0
0.541733	-1.07006	0
0.541733	-0.831109	1
0.541733	0.0400151	0
0.541733	-0.312148	0
0.541733	0.309629	0
0.541733	-0.68968	0
0.541733	0.734614	0
0.541733	0.571493	0
0.541733	-0.536532	0
0.541733	0.519431	0
0.541733	0.131038	0
0.541733	-1.28503	0
0.541733	-0.284945	0
0.541733	0.375411	0
0.541733	-0.189593	0
0.541733	3.19673	0
-1.2441	-0.621079	1
-1.2441	0.847459	0
-1.2441	-0.905634	0
-1.2441	-1.07006	0
-1.2441	-0.831109	0
-1.2441	0.0400151	0
-1.2441	-0.312148	0
-1.2441	0.309629	0
-1.2441	-0.68968	0
-1.2441	0.734614	0
-1.2441	0.571493	0
-1.2441	-0.536532	0
-1.2441	0.519431	0
-1.2441	0.131038	0
-1.2441	-1.28503	0
-1.2441	-0.284945	0
-1.2441	0.375411	0
-1.2441	-0.189593	0
-1.2441	3.19673	0
-0.269943	-0.621079	0
-0.269943	0.847459	0
-0.269943	-0.905634	0
-0.269943	-1.07006	0
-0.269943	-0.831109	0
-0.269943	0.0400151	0
-0.269943	-0.312148	0
-0.269943	0.309629	0
-0.269943	-0.68968	0
-0.269943	0.734614	0
-0.269943	0.571493	0
-0.269943	-0.536532	0
-0.269943	0.519431	1
-0.269943	0.131038	0
-0.269943	-1.28503	0
-0.269943	-0.284945	0
-0.269943	0.375411	0
-0.269943	-0.189593	0
-0.269943	3.19673	0
1.91498	-0.621079	0
1.91498	0.847459	0
1.91498	-0.905634	0
1.91498	-1.07006	1
1.91498	-0.831109	0
1.91498	0.0400151	0
1.91498	-0.312148	1
1.91498	0.309629	0
1.91498	-0.68968	0
1.91498	0.734614	0
1.91498	0.571493	0
1.91498	-0.536532	0
1.91498	0.519431	0
1.91498	0.131038	0
1.91498	-1.28503	0
1.91498	-0.284945	0
1.91498	0.375411	0
1.91498	-0.189593	0
1.91498	3.19673	0
0.185983	-0.621079	0
0.185983	0.847459	0
0.185983	-0.905634	0
0.185983	-1.07006	0
0.185983	-0.831109	0
0.185983	0.0400151	0
0.185983	-0.312148	0
0.185983	0.309629	0
0.185983	-0.68968	0
0.185983	0.734614	0
0.185983	0.571493	0
0.185983	-0.536532	0
0.185983	0.519431	0
0.185983	0.131038	1
0.185983	-1.28503	0
0.185983	-0.284945	0
0.185983	0.375411	0
0.185983	-0.189593	0
0.185983	3.19673	0
0.385494	-0.89059	0
0.385494	0.535106	0
0.385494	-0.231909	0
0.385494	-1.20977	0
0.385494	-0.212948	0
0.385494	-0.64335	0
0.385494	-0.359367	0
0.385494	0.780362	0
0.385494	0.0182769	0
0.385494	0.4983	1
0.385494	-0.310448	1
0.385494	-0.0415632	1
0.385494	-0.0491186	0
0.385494	0.186483	0
0.385494	-0.337797	0
0.385494	-0.153088	0
0.385494	-0.145828	0
0.385494	-0.620531	0
0.385494	-0.0377053	0
-0.267194	-0.89059	0
-0.267194	0.535106	0
-0.267194	-0.231909	0
-0.267194	-1.20977	0
-0.267194	-0.212948	0
-0.267194	-0.64335	1
-0.267194	-0.359367	0
-0.267194	0.780362	0
-0.267194	0.0182769	0
-0.267194	0.4983	0
-0.267194	-0.310448	0
-0.267194	-0.0415632	0
-0.267194	-0.0491186	0
-0.267194	0.186483	0
-0.267194	-0.337797	0
-0.267194	-0.153088	0
-0.267194	-0.145828	0
-0.267194	-0.620531	0
-0.267194	-0.0377053	0
-0.384541	-0.89059	0
-0.384541	0.535106	0
-0.384541	-0.231909	0
-0.384541	-1.20977	0
-0.384541	-0.212948	0
-0.384541	-0.64335	1
-0.384541	-0.359367	0
-0.384541	0.780362	0
-0.384541	0.0182769	0
-0.384541	0.4983	0
-0.384541	-0.310448	0
-0.384541	-0.0415632	0
-0.384541	-0.0491186	0
-0.384541	0.186483	0
-0.384541	-0.337797	0
-0.384541	-0.153088	0
-0.384541	-0.145828	0
-0.384541	-0.620531	0
-0.384541	-0.0377053	0
0.329298	-0.89059	0
0.329298	0.535106	0
0.329298	-0.231909	0
0.329298	-1.20977	0
0.329298	-0.212948	0
0.329298	-0.64335	0
0.329298	-0.359367	0
0.329298	0.780362	0
0.329298	0.0182769	0
0.329298	0.4983	1
0.329298	-0.310448	1
0.329298	-0.0415632	0
0.329298	-0.0491186	0
0.329298	0.186483	0
0.329298	-0.337797	0
0.329298	-0.153088	0
0.329298	-0.145828	0
0.329298	-0.620531	0
0.329298	-0.0377053	0
-0.0933817	-0.89059	0
-0.0933817	0.535106	0
-0.0933817	-0.231909	0
-0.0933817	-1.20977	0
-0.0933817	-0.212948	0
-0.0933817	-0.64335	0
-0.0933817	-0.359367	0
-0.0933817	0.780362	1
-0.0933817	0.0182769	0
-0.0933817	0.4983	0
-0.0933817	-0.310448	0
-0.0933817	-0.0415632	0
-0.0933817	-0.0491186	0
-0.0933817	0.186483	0
-0.0933817	-0.337797	0
-0.0933817	-0.153088	0
-0.0933817	-0.145828	0
-0.0933817	-0.620531	0
-0.0933817	-0.0377053	0
-0.0766059	-0.89059	0
-0.0766059	0.535106	0
-0.0766059	-0.231909	0
-0.0766059	-1.20977	0
-0.0766059	-0.212948	0
-0.0766059	-0.64335	0
-0.0766059	-0.359367	0
-0.0766059	0.780362	0
-0.0766059	0.0182769	0
-0.0766059	0.4983	0
-0.0766059	-0.310448	0
-0.0766059	-0.0415632	0
-0.0766059	-0.0491186	0
-0.0766059	0.186483	0
-0.0766059	-0.337797	0
-0.0766059	-0.153088	0
-0.0766059	-0.145828	0
-0.0766059	-0.620531	0
-0.0766059	-0.0377053	0
-1.67672	-0.89059	0
-1.67672	0.535106	0
-1.67672	-0.231909	0
-1.67672	-1.20977	0
-1.67672	-0.212948	0
-1.67672	-0.64335	0
-1.67672	-0.359367	0
-1.67672	0.780362	0
-1.67672	0.0182769	0
-1.67672	0.4983	0
-1.67672	-0.310448	0
-1.67672	-0.0415632	0
-1.67672	-0.0491186	0
-1.67672	0.186483	0
-1.67672	-0.337797	0
-1.67672	-0.153088	0
-1.67672	-0.145828	0
-1.67672	-0.620531	0
-1.67672	-0.0377053	0
-0.218397	-0.89059	1
-0.218397	0.535106	0
-0.218397	-0.231909	0
-0.218397	-1.20977	0
-0.218397	-0.212948	0
-0.218397	-0.64335	0
-0.218397	-0.359367	0
-0.218397	0.780362	0
-0.218397	0.0182769	0
-0.218397	0.4983	0
-0.218397	-0.310448	0
-0.218397	-0.0415632	0
-0.218397	-0.0491186	0
-0.218397	0.186483	0
-0.218397	-0.337797	0
-0.218397	-0.153088	0
-0.218397	-0.145828	0
-0.218397	-0.620531	0
-0.218397	-0.0377053	0
0.776866	-0.89059	0
0.776866	0.535106	1
0.776866	-0.231909	1
0.776866	-1.20977	0
0.776866	-0.212948	0
0.776866	-0.64335	0
0.776866	-0.359367	0
0.776866	0.780362	0
0.776866	0.0182769	0
0.776866	0.4983	0
0.776866	-0.310448	0
0.776866	-0.0415632	0
0.776866	-0.0491186	0
0.776866	0.186483	0
0.776866	-0.337797	0
0.776866	-0.153088	0
0.776866	-0.145828	0
0.776866	-0.620531	0
0.776866	-0.0377053	0
1.85581	-0.89059	0
1.85581	0.535106	0
1.85581	-0.231909	0
1.85581	-1.20977	0
1.85581	-0.212948	0
1.85581	-0.64335	0
1.85581	-0.359367	0
1.85581	0.780362	0
1.85581	0.0182769	0
1.85581	0.4983	0
1.85581	-0.310448	0
1.85581	-0.0415632	0
1.85581	-0.0491186	0
1.85581	0.186483	0
1.85581	-0.337797	0
1.85581	-0.153088	0
1.85581	-0.145828	0
1.85581	-0.620531	0
1.85581	-0.0377053	0
-0.326629	-0.89059	0
-0.326629	0.535106	0
-0.326629	-0.231909	0
-0.326629	-1.20977	1
[truncated: 456,321+ more rows]

## Sheet: Figure 2G
Tissue	Likely affected cell types	Random cell types
Bone marrow	22	4
Bone marrow	22	3
Bone marrow	22	9
Bone marrow	22	2
Bone marrow	22	2
Bone marrow	22	8
Bone marrow	22	8
Bone marrow	22	3
Bone marrow	22	5
Bone marrow	22	4
Bone marrow	22	9
Bone marrow	22	9
Bone marrow	22	5
Bone marrow	22	5
Bone marrow	22	6
Bone marrow	22	8
Bone marrow	22	4
Bone marrow	22	4
Bone marrow	22	5
Bone marrow	22	4
Bone marrow	22	8
Bone marrow	22	5
Bone marrow	22	6
Bone marrow	22	3
Bone marrow	22	4
Bone marrow	22	4
Bone marrow	22	5
Bone marrow	22	6
Bone marrow	22	1
Bone marrow	22	6
Bone marrow	22	5
Bone marrow	22	7
Bone marrow	22	5
Bone marrow	22	5
Bone marrow	22	3
Bone marrow	22	5
Bone marrow	22	5
Bone marrow	22	6
Bone marrow	22	2
Bone marrow	22	6
Bone marrow	22	7
Bone marrow	22	7
Bone marrow	22	6
Bone marrow	22	6
Bone marrow	22	5
Bone marrow	22	1
Bone marrow	22	7
Bone marrow	22	3
Bone marrow	22	3
Bone marrow	22	2
Bone marrow	22	4
Bone marrow	22	5
Bone marrow	22	5
Bone marrow	22	9
Bone marrow	22	8
Bone marrow	22	6
Bone marrow	22	3
Bone marrow	22	2
Bone marrow	22	8
Bone marrow	22	5
Bone marrow	22	5
Bone marrow	22	9
Bone marrow	22	5
Bone marrow	22	9
Bone marrow	22	4
Bone marrow	22	5
Bone marrow	22	6
Bone marrow	22	5
Bone marrow	22	5
Bone marrow	22	4
Bone marrow	22	3
Bone marrow	22	3
Bone marrow	22	6
Bone marrow	22	5
Bone marrow	22	4
Bone marrow	22	6
Bone marrow	22	4
Bone marrow	22	11
Bone marrow	22	3
Bone marrow	22	8
Bone marrow	22	5
Bone marrow	22	6
Bone marrow	22	7
Bone marrow	22	4
Bone marrow	22	3
Bone marrow	22	5
Bone marrow	22	9
Bone marrow	22	6
Bone marrow	22	7
Bone marrow	22	6
Bone marrow	22	9
Bone marrow	22	4
Bone marrow	22	10
Bone marrow	22	4
Bone marrow	22	6
Bone marrow	22	7
Bone marrow	22	2
Bone marrow	22	4
Bone marrow	22	5
Bone marrow	22	6
Bone marrow	22	5
Bone marrow	22	6
Bone marrow	22	6
Bone marrow	22	6
Bone marrow	22	2
Bone marrow	22	2
Bone marrow	22	12
Bone marrow	22	8
Bone marrow	22	8
Bone marrow	22	3
Bone marrow	22	5
Bone marrow	22	5
Bone marrow	22	6
Bone marrow	22	9
Bone marrow	22	3
Bone marrow	22	4
Bone marrow	22	3
Bone marrow	22	4
Bone marrow	22	5
Bone marrow	22	5
Bone marrow	22	2
Bone marrow	22	9
Bone marrow	22	9
Bone marrow	22	2
Bone marrow	22	7
Bone marrow	22	7
Bone marrow	22	7
Bone marrow	22	5
Bone marrow	22	4
Bone marrow	22	7
Bone marrow	22	8
Bone marrow	22	2
Bone marrow	22	7
Bone marrow	22	6
Bone marrow	22	4
Bone marrow	22	3
Bone marrow	22	6
Bone marrow	22	2
Bone marrow	22	6
Bone marrow	22	7
Bone marrow	22	8
Bone marrow	22	4
Bone marrow	22	7
Bone marrow	22	5
Bone marrow	22	3
Bone marrow	22	1
Bone marrow	22	6
Bone marrow	22	3
Bone marrow	22	8
Bone marrow	22	6
Bone marrow	22	5
Bone marrow	22	4
Bone marrow	22	3
Bone marrow	22	4
Bone marrow	22	9
Bone marrow	22	6
Bone marrow	22	6
Bone marrow	22	3
Bone marrow	22	5
Bone marrow	22	4
Bone marrow	22	10
Bone marrow	22	4
Bone marrow	22	8
Bone marrow	22	2
Bone marrow	22	2
Bone marrow	22	6
Bone marrow	22	3
Bone marrow	22	4
Bone marrow	22	4
Bone marrow	22	10
Bone marrow	22	6
Bone marrow	22	6
Bone marrow	22	5
Bone marrow	22	6
Bone marrow	22	4
Bone marrow	22	4
Bone marrow	22	5
Bone marrow	22	6
Bone marrow	22	3
Bone marrow	22	10
Bone marrow	22	12
Bone marrow	22	3
Bone marrow	22	5
Bone marrow	22	6
Bone marrow	22	6
Bone marrow	22	4
Bone marrow	22	8
Bone marrow	22	7
Bone marrow	22	6
Bone marrow	22	5
Bone marrow	22	5
Bone marrow	22	8
Bone marrow	22	6
Bone marrow	22	7
Bone marrow	22	5
Bone marrow	22	8
Bone marrow	22	5
Bone marrow	22	7
Bone marrow	22	3
Bone marrow	22	4
Bone marrow	22	8
Bone marrow	22	5
Bone marrow	22	7
Bone marrow	22	8
Bone marrow	22	6
Bone marrow	22	3
Bone marrow	22	12
Bone marrow	22	5
Bone marrow	22	4
Bone marrow	22	5
Bone marrow	22	3
Bone marrow	22	7
Bone marrow	22	3
Bone marrow	22	8
Bone marrow	22	11
Bone marrow	22	4
Bone marrow	22	3
Bone marrow	22	6
Bone marrow	22	13
Bone marrow	22	6
Bone marrow	22	8
Bone marrow	22	5
Bone marrow	22	5
Bone marrow	22	5
Bone marrow	22	5
Bone marrow	22	7
Bone marrow	22	4
Bone marrow	22	7
Bone marrow	22	5
Bone marrow	22	3
Bone marrow	22	7
Bone marrow	22	2
Bone marrow	22	8
Bone marrow	22	1
Bone marrow	22	4
Bone marrow	22	3
Bone marrow	22	4
Bone marrow	22	5
Bone marrow	22	6
Bone marrow	22	4
Bone marrow	22	2
Bone marrow	22	2
Bone marrow	22	4
Bone marrow	22	2
Bone marrow	22	5
Bone marrow	22	6
Bone marrow	22	5
Bone marrow	22	3
Bone marrow	22	4
Bone marrow	22	9
Bone marrow	22	3
Bone marrow	22	8
Bone marrow	22	4
Bone marrow	22	4
Bone marrow	22	4
Bone marrow	22	7
Bone marrow	22	5
Bone marrow	22	4
Bone marrow	22	7
Bone marrow	22	5
Bone marrow	22	4
Bone marrow	22	7
Bone marrow	22	8
Bone marrow	22	10
Bone marrow	22	5
Bone marrow	22	6
Bone marrow	22	5
Bone marrow	22	2
Bone marrow	22	5
Bone marrow	22	5
Bone marrow	22	9
Bone marrow	22	6
Bone marrow	22	2
Bone marrow	22	7
Bone marrow	22	3
Bone marrow	22	4
Bone marrow	22	4
Bone marrow	22	1
Bone marrow	22	4
Bone marrow	22	8
Bone marrow	22	5
Bone marrow	22	7
Bone marrow	22	4
Bone marrow	22	3
Bone marrow	22	6
Bone marrow	22	2
Bone marrow	22	4
Bone marrow	22	4
Bone marrow	22	5
Bone marrow	22	4
Bone marrow	22	4
Bone marrow	22	5
Bone marrow	22	7
Bone marrow	22	9
Bone marrow	22	4
Bone marrow	22	5
Bone marrow	22	4
Bone marrow	22	3
Bone marrow	22	7
Bone marrow	22	10
Bone marrow	22	6
Bone marrow	22	4
Bone marrow	22	7
Bone marrow	22	7
Bone marrow	22	7
Bone marrow	22	8
Bone marrow	22	3
Bone marrow	22	4
Bone marrow	22	5
Bone marrow	22	8
Bone marrow	22	5
Bone marrow	22	3
Bone marrow	22	2
Bone marrow	22	7
Bone marrow	22	5
Bone marrow	22	4
Bone marrow	22	4
Bone marrow	22	7
Bone marrow	22	3
Bone marrow	22	6
Bone marrow	22	2
Bone marrow	22	8
Bone marrow	22	5
Bone marrow	22	7
Bone marrow	22	5
Bone marrow	22	9
Bone marrow	22	3
Bone marrow	22	6
Bone marrow	22	4
Bone marrow	22	9
Bone marrow	22	5
Bone marrow	22	2
Bone marrow	22	4
Bone marrow	22	4
Bone marrow	22	5
Bone marrow	22	4
Bone marrow	22	5
Bone marrow	22	4
Bone marrow	22	2
Bone marrow	22	5
Bone marrow	22	2
Bone marrow	22	8
Bone marrow	22	7
Bone marrow	22	3
Bone marrow	22	7
Bone marrow	22	1
Bone marrow	22	8
Bone marrow	22	9
Bone marrow	22	2
Bone marrow	22	5
Bone marrow	22	10
Bone marrow	22	5
Bone marrow	22	6
Bone marrow	22	2
Bone marrow	22	3
Bone marrow	22	6
Bone marrow	22	5
Bone marrow	22	3
Bone marrow	22	5
Bone marrow	22	4
Bone marrow	22	5
Bone marrow	22	5
Bone marrow	22	4
Bone marrow	22	7
Bone marrow	22	7
Bone marrow	22	6
Bone marrow	22	8
Bone marrow	22	6
Bone marrow	22	5
Bone marrow	22	5
Bone marrow	22	13
Bone marrow	22	6
Bone marrow	22	6
Bone marrow	22	5
Bone marrow	22	5
Bone marrow	22	6
Bone marrow	22	5
Bone marrow	22	5
Bone marrow	22	1
Bone marrow	22	4
Bone marrow	22	7
Bone marrow	22	4
Bone marrow	22	7
Bone marrow	22	5
Bone marrow	22	9
Bone marrow	22	7
Bone marrow	22	9
Bone marrow	22	7
Bone marrow	22	5
Bone marrow	22	5
Bone marrow	22	4
Bone marrow	22	4
Bone marrow	22	3
Bone marrow	22	6
Bone marrow	22	5
Bone marrow	22	5
Bone marrow	22	5
Bone marrow	22	5
Bone marrow	22	2
Bone marrow	22	4
Bone marrow	22	6
Bone marrow	22	5
Bone marrow	22	2
Bone marrow	22	6
Bone marrow	22	4
Bone marrow	22	3
Bone marrow	22	5
Bone marrow	22	11
Bone marrow	22	4
Bone marrow	22	7
Bone marrow	22	5
Bone marrow	22	6
Bone marrow	22	4
Bone marrow	22	3
Bone marrow	22	3
Bone marrow	22	8
Bone marrow	22	4
Bone marrow	22	6
Bone marrow	22	5
Bone marrow	22	7
Bone marrow	22	6
Bone marrow	22	7
Bone marrow	22	4
Bone marrow	22	6
Bone marrow	22	5
Bone marrow	22	6
Bone marrow	22	1
Bone marrow	22	4
Bone marrow	22	6
Bone marrow	22	8
Bone marrow	22	2
Bone marrow	22	10
Bone marrow	22	3
Bone marrow	22	2
Bone marrow	22	7
Bone marrow	22	7
Bone marrow	22	4
Bone marrow	22	5
Bone marrow	22	8
Bone marrow	22	4
Bone marrow	22	2
Bone marrow	22	6
Bone marrow	22	7
Bone marrow	22	5
Bone marrow	22	6
Bone marrow	22	2
Bone marrow	22	7
Bone marrow	22	7
Bone marrow	22	6
Bone marrow	22	5
Bone marrow	22	4
Bone marrow	22	2
Bone marrow	22	6
Bone marrow	22	8
Bone marrow	22	10
Bone marrow	22	3
Bone marrow	22	6
Bone marrow	22	2
Bone marrow	22	5
Bone marrow	22	7
Bone marrow	22	3
Bone marrow	22	2
Bone marrow	22	5
Bone marrow	22	2
Bone marrow	22	5
Bone marrow	22	9
Bone marrow	22	4
Bone marrow	22	10
Bone marrow	22	5
Bone marrow	22	6
Bone marrow	22	4
Bone marrow	22	3
Bone marrow	22	4
Bone marrow	22	5
Bone marrow	22	5
Bone marrow	22	8
Bone marrow	22	9
Bone marrow	22	9
Bone marrow	22	4
Bone marrow	22	6
Bone marrow	22	3
Bone marrow	22	5
Bone marrow	22	7
Bone marrow	22	10
Bone marrow	22	4
Bone marrow	22	3
Bone marrow	22	5
Bone marrow	22	2
Bone marrow	22	5
Bone marrow	22	6
Bone marrow	22	7
Bone marrow	22	5
Bone marrow	22	3
Bone marrow	22	8
Bone marrow	22	5
Bone marrow	22	7
Bone marrow	22	2
Bone marrow	22	5
Bone marrow	22	4
Bone marrow	22	5
Bone marrow	22	2
Bone marrow	22	5
Bone marrow	22	3
Bone marrow	22	5
Bone marrow	22	4
Bone marrow	22	7
Bone marrow	22	7
Bone marrow	22	3
Bone marrow	22	0
Bone marrow	22	5
Bone marrow	22	4
Bone marrow	22	7
Bone marrow	22	5
Bone marrow	22	4
Bone marrow	22	6
Bone marrow	22	4
Bone marrow	22	6
Bone marrow	22	5
Bone marrow	22	2
Bone marrow	22	6
Bone marrow	22	6
Bone marrow	22	6
Bone marrow	22	4
Bone marrow	22	4
Bone marrow	22	4
Bone marrow	22	7
Bone marrow	22	8
Bone marrow	22	9
Bone marrow	22	4
Bone marrow	22	4
Bone marrow	22	5
Bone marrow	22	6
Bone marrow	22	7
Bone marrow	22	8
Bone marrow	22	5
Bone marrow	22	5
Bone marrow	22	7
Bone marrow	22	7
Bone marrow	22	6
Bone marrow	22	5
Bone marrow	22	9
Bone marrow	22	7
Bone marrow	22	6
Bone marrow	22	5
Bone marrow	22	4
Bone marrow	22	4
Bone marrow	22	3
Bone marrow	22	5
Bone marrow	22	6
Bone marrow	22	5
Bone marrow	22	9
Bone marrow	22	4
Bone marrow	22	5
Bone marrow	22	5
Bone marrow	22	8
Bone marrow	22	3
Bone marrow	22	6
Bone marrow	22	4
Bone marrow	22	4
Bone marrow	22	5
Bone marrow	22	4
Bone marrow	22	3
Bone marrow	22	3
Bone marrow	22	4
Bone marrow	22	6
Bone marrow	22	6
Bone marrow	22	5
Bone marrow	22	8
Bone marrow	22	1
Bone marrow	22	5
Bone marrow	22	8
Bone marrow	22	7
Bone marrow	22	4
Bone marrow	22	7
Bone marrow	22	5
Bone marrow	22	6
Bone marrow	22	7
Bone marrow	22	3
Bone marrow	22	6
Bone marrow	22	3
Bone marrow	22	9
Bone marrow	22	5
Bone marrow	22	4
Bone marrow	22	5
Bone marrow	22	4
Bone marrow	22	5
Bone marrow	22	5
Bone marrow	22	5
Bone marrow	22	5
Bone marrow	22	4
Bone marrow	22	5
Bone marrow	22	7
Bone marrow	22	4
Bone marrow	22	9
Bone marrow	22	4
Bone marrow	22	5
Bone marrow	22	5
Bone marrow	22	7
Bone marrow	22	7
Bone marrow	22	7
Bone marrow	22	7
Bone marrow	22	9
Bone marrow	22	7
Bone marrow	22	2
Bone marrow	22	4
Bone marrow	22	4
Bone marrow	22	3
Bone marrow	22	5
Bone marrow	22	5
Bone marrow	22	8
Bone marrow	22	5
Bone marrow	22	6
Bone marrow	22	5
Bone marrow	22	4
Bone marrow	22	6
Bone marrow	22	5
Bone marrow	22	4
Bone marrow	22	4
Bone marrow	22	6
Bone marrow	22	5
Bone marrow	22	2
Bone marrow	22	4
Bone marrow	22	5
Bone marrow	22	6
Bone marrow	22	4
Bone marrow	22	3
Bone marrow	22	2
Bone marrow	22	3
Bone marrow	22	7
Bone marrow	22	7
Bone marrow	22	7
Bone marrow	22	6
Bone marrow	22	3
Bone marrow	22	3
Bone marrow	22	7
Bone marrow	22	9
Bone marrow	22	3
Bone marrow	22	2
Bone marrow	22	8
Bone marrow	22	8
Bone marrow	22	3
Bone marrow	22	6
Bone marrow	22	5
Bone marrow	22	4
Bone marrow	22	9
Bone marrow	22	2
Bone marrow	22	5
Bone marrow	22	4
Bone marrow	22	3
Bone marrow	22	8
Bone marrow	22	3
Bone marrow	22	6
Bone marrow	22	6
Bone marrow	22	6
Bone marrow	22	7
Bone marrow	22	7
Bone marrow	22	3
Bone marrow	22	6
Bone marrow	22	7
Bone marrow	22	5
Bone marrow	22	6
Bone marrow	22	5
Bone marrow	22	3
Bone marrow	22	7
Bone marrow	22	5
Bone marrow	22	5
Bone marrow	22	5
Bone marrow	22	8
Bone marrow	22	7
Bone marrow	22	6
Bone marrow	22	3
Bone marrow	22	5
Bone marrow	22	7
Bone marrow	22	6
Bone marrow	22	2
Bone marrow	22	4
Bone marrow	22	9
Bone marrow	22	4
Bone marrow	22	4
Bone marrow	22	7
Bone marrow	22	4
Bone marrow	22	3
Bone marrow	22	5
Bone marrow	22	6
Bone marrow	22	3
Bone marrow	22	6
Bone marrow	22	3
Bone marrow	22	6
Bone marrow	22	6
Bone marrow	22	6
Bone marrow	22	4
Bone marrow	22	5
Bone marrow	22	3
Bone marrow	22	3
Bone marrow	22	7
Bone marrow	22	8
Bone marrow	22	5
Bone marrow	22	6
Bone marrow	22	4
Bone marrow	22	9
Bone marrow	22	3
Bone marrow	22	2
Bone marrow	22	6
Bone marrow	22	8
Bone marrow	22	5
Bone marrow	22	9
Bone marrow	22	6
Bone marrow	22	5
Bone marrow	22	4
Bone marrow	22	5
Bone marrow	22	6
Bone marrow	22	5
Bone marrow	22	5
Bone marrow	22	8
Bone marrow	22	7
Bone marrow	22	2
Bone marrow	22	6
Bone marrow	22	4
Bone marrow	22	2
Bone marrow	22	6
Bone marrow	22	2
Bone marrow	22	4
Bone marrow	22	5
Bone marrow	22	6
Bone marrow	22	4
Bone marrow	22	3
Bone marrow	22	6
Bone marrow	22	6
Bone marrow	22	1
Bone marrow	22	3
Bone marrow	22	4
Bone marrow	22	2
Bone marrow	22	4
Bone marrow	22	7
Bone marrow	22	2
Bone marrow	22	4
Bone marrow	22	5
Bone marrow	22	4
Bone marrow	22	7
Bone marrow	22	4
Bone marrow	22	4
Bone marrow	22	9
Bone marrow	22	5
Bone marrow	22	4
Bone marrow	22	4
Bone marrow	22	7
Bone marrow	22	9
Bone marrow	22	7
Bone marrow	22	9
Bone marrow	22	5
Bone marrow	22	7
Bone marrow	22	0
Bone marrow	22	4
Bone marrow	22	3
Bone marrow	22	9
Bone marrow	22	9
Bone marrow	22	5
Bone marrow	22	3
Bone marrow	22	6
Bone marrow	22	4
Bone marrow	22	6
Bone marrow	22	8
Bone marrow	22	5
Bone marrow	22	10
Bone marrow	22	6
Bone marrow	22	2
Bone marrow	22	2
Bone marrow	22	6
Bone marrow	22	5
Bone marrow	22	1
Bone marrow	22	2
Bone marrow	22	10
Bone marrow	22	6
Bone marrow	22	6
Bone marrow	22	7
Bone marrow	22	3
Bone marrow	22	7
Bone marrow	22	5
Bone marrow	22	6
Bone marrow	22	6
Bone marrow	22	3
Bone marrow	22	6
Bone marrow	22	3
Bone marrow	22	5
Bone marrow	22	5
Bone marrow	22	4
Bone marrow	22	5
Bone marrow	22	4
Bone marrow	22	4
Bone marrow	22	4
Bone marrow	22	1
Bone marrow	22	8
Bone marrow	22	6
Bone marrow	22	8
Bone marrow	22	7
Bone marrow	22	4
Bone marrow	22	5
Bone marrow	22	4
Bone marrow	22	5
Bone marrow	22	3
Bone marrow	22	5
Bone marrow	22	7
Bone marrow	22	5
Bone marrow	22	8
Bone marrow	22	4
Bone marrow	22	5
Bone marrow	22	7
Bone marrow	22	4
Bone marrow	22	5
Bone marrow	22	4
Bone marrow	22	1
Bone marrow	22	7
Bone marrow	22	4
Bone marrow	22	4
Bone marrow	22	4
Bone marrow	22	3
Bone marrow	22	5
Bone marrow	22	5
Bone marrow	22	6
Bone marrow	22	2
Bone marrow	22	8
Bone marrow	22	7
Bone marrow	22	5
Bone marrow	22	2
Bone marrow	22	8
Bone marrow	22	6
Bone marrow	22	5
Bone marrow	22	9
Bone marrow	22	4
Bone marrow	22	4
Bone marrow	22	2
Bone marrow	22	6
Bone marrow	22	4
Bone marrow	22	9
Bone marrow	22	6
Bone marrow	22	7
Bone marrow	22	9
Bone marrow	22	3
Bone marrow	22	5
Bone marrow	22	3
Bone marrow	22	4
Bone marrow	22	5
Bone marrow	22	8
Bone marrow	22	1
Bone marrow	22	3
Bone marrow	22	4
Bone marrow	22	8
Bone marrow	22	6
Bone marrow	22	3
Bone marrow	22	7
Bone marrow	22	8
Bone marrow	22	4
Bone marrow	22	4
Bone marrow	22	7
Bone marrow	22	6
Bone marrow	22	5
Bone marrow	22	4
Bone marrow	22	2
Bone marrow	22	8
Bone marrow	22	6
Bone marrow	22	4
Bone marrow	22	5
Bone marrow	22	3
Bone marrow	22	2
Bone marrow	22	4
Bone marrow	22	6
Bone marrow	22	5
Bone marrow	22	5
Bone marrow	22	6
Bone marrow	22	6
Bone marrow	22	8
Bone marrow	22	8
Bone marrow	22	8
Bone marrow	22	6
Bone marrow	22	6
Bone marrow	22	8
Bone marrow	22	4
Bone marrow	22	8
Bone marrow	22	3
Bone marrow	22	12
Bone marrow	22	6
Bone marrow	22	7
Bone marrow	22	8
Bone marrow	22	4
Bone marrow	22	4
Bone marrow	22	3
Bone marrow	22	4
Bone marrow	22	6
Bone marrow	22	7
Bone marrow	22	1
Bone marrow	22	7
Bone marrow	22	8
Bone marrow	22	4
Bone marrow	22	8
Bone marrow	22	4
Bone marrow	22	8
Bone marrow	22	3
Bone marrow	22	7
Bone marrow	22	7
Bone marrow	22	4
Bone marrow	22	5
Bone marrow	22	2
Bone marrow	22	5
Bone marrow	22	4
Bone marrow	22	5
Bone marrow	22	3
Bone marrow	22	7
Bone marrow	22	10
Bone marrow	22	6
Bone marrow	22	4
Bone marrow	22	7
Bone marrow	22	7
Bone marrow	22	1
Bone marrow	22	9
Bone marrow	22	8
Bone marrow	22	5
Bone marrow	22	7
Bone marrow	22	5
Bone marrow	22	7
Bone marrow	22	5
Bone marrow	22	12
Bone marrow	22	4
Bone marrow	22	5
Bone marrow	22	5
Bone marrow	22	6
Bone marrow	22	5
Bone marrow	22	11
Bone marrow	22	4
Bone marrow	22	7
Bone marrow	22	5
Bone marrow	22	5
Bone marrow	22	3
Bone marrow	22	3
Bone marrow	22	4
Bone marrow	22	8
Bone marrow	22	5
Bone marrow	22	3
Bone marrow	22	6
Bone marrow	22	6
Bone marrow	22	7
Bone marrow	22	4
Bone marrow	22	4
Bone marrow	22	12
Bone marrow	22	2
Bone marrow	22	12
Bone marrow	22	8
Bone marrow	22	6
Bone marrow	22	5
Bone marrow	22	9
Bone marrow	22	6
Bone marrow	22	3
Bone marrow	22	4
Bone marrow	22	2
Bone marrow	22	8
Bone marrow	22	6
Bone marrow	22	6
Bone marrow	22	3
Bone marrow	22	4
Bone marrow	22	6
Bone marrow	22	7
Bone marrow	22	5
Bone marrow	22	3
Bone marrow	22	7
Bone marrow	22	6
Bone marrow	22	4
Bone marrow	22	8
Bone marrow	22	2
Bone marrow	22	4
Bone marrow	22	6
Bone marrow	22	2
Bone marrow	22	2
Bone marrow	22	6
Bone marrow	22	4
Bone marrow	22	3
Bone marrow	22	11
Bone marrow	22	3
Bone marrow	22	3
Bone marrow	22	6
Bone marrow	22	5
Bone marrow	22	3
Bone marrow	22	6
Bone marrow	22	6
Bone marrow	22	5
Bone marrow	22	3
Bone marrow	22	7
Bone marrow	22	6
Bone marrow	22	2
Bone marrow	22	8
Bone marrow	22	5
Bone marrow	22	1
Bone marrow	22	2
Bone marrow	22	5
Bone marrow	22	5
Bone marrow	22	6
Bone marrow	22	5
Bone marrow	22	4
Bone marrow	22	7
Bone marrow	22	5
Bone marrow	22	4
Bone marrow	22	6
Lung	20	8
Lung	20	5
Lung	20	5
Lung	20	4
Lung	20	6
Lung	20	2
Lung	20	6
Lung	20	2
Lung	20	4
Lung	20	3
Lung	20	5
Lung	20	5
Lung	20	3
Lung	20	6
Lung	20	3
Lung	20	7
Lung	20	4
Lung	20	5
Lung	20	2
Lung	20	7
Lung	20	2
Lung	20	5
Lung	20	5
Lung	20	8
Lung	20	4
Lung	20	4
Lung	20	5
Lung	20	3
Lung	20	1
Lung	20	8
Lung	20	2
Lung	20	7
Lung	20	8
Lung	20	4
Lung	20	3
Lung	20	5
Lung	20	5
Lung	20	4
Lung	20	2
Lung	20	4
Lung	20	1
Lung	20	4
Lung	20	6
Lung	20	6
Lung	20	7
Lung	20	4
Lung	20	7
Lung	20	6
Lung	20	3
Lung	20	3
Lung	20	6
Lung	20	3
Lung	20	4
Lung	20	4
Lung	20	3
Lung	20	6
Lung	20	6
Lung	20	4
Lung	20	3
Lung	20	4
Lung	20	6
Lung	20	5
Lung	20	6
Lung	20	5
Lung	20	2
Lung	20	4
Lung	20	3
Lung	20	4
Lung	20	6
Lung	20	5
Lung	20	4
Lung	20	4
Lung	20	6
Lung	20	6
Lung	20	4
Lung	20	8
Lung	20	4
Lung	20	4
Lung	20	6
Lung	20	2
Lung	20	5
Lung	20	6
Lung	20	5
Lung	20	5
Lung	20	3
Lung	20	4
Lung	20	4
Lung	20	3
Lung	20	2
Lung	20	4
Lung	20	4
Lung	20	3
Lung	20	5
Lung	20	3
Lung	20	5
Lung	20	6
Lung	20	5
Lung	20	2
Lung	20	6
Lung	20	3
Lung	20	2
Lung	20	8
Lung	20	4
Lung	20	3
Lung	20	5
Lung	20	3
Lung	20	4
Lung	20	4
Lung	20	7
Lung	20	5
Lung	20	4
Lung	20	5
Lung	20	5
Lung	20	5
Lung	20	6
Lung	20	4
Lung	20	2
Lung	20	4
Lung	20	5
Lung	20	3
Lung	20	3
Lung	20	3
Lung	20	3
Lung	20	4
Lung	20	5
Lung	20	4
Lung	20	3
Lung	20	6
Lung	20	2
Lung	20	5
Lung	20	3
Lung	20	6
Lung	20	4
Lung	20	3
Lung	20	9
Lung	20	3
Lung	20	6
Lung	20	2
Lung	20	3
Lung	20	6
Lung	20	2
Lung	20	4
Lung	20	6
Lung	20	2
Lung	20	4
Lung	20	5
Lung	20	8
Lung	20	4
Lung	20	5
Lung	20	3
Lung	20	3
Lung	20	1
Lung	20	3
Lung	20	3
Lung	20	8
Lung	20	2
Lung	20	1
Lung	20	4
Lung	20	4
Lung	20	8
Lung	20	4
Lung	20	4
Lung	20	4
Lung	20	5
Lung	20	2
Lung	20	7
Lung	20	3
Lung	20	5
Lung	20	1
Lung	20	5
Lung	20	4
Lung	20	4
Lung	20	6
Lung	20	3
Lung	20	5
Lung	20	5
Lung	20	3
Lung	20	1
Lung	20	3
Lung	20	1
Lung	20	4
Lung	20	5
Lung	20	2
Lung	20	7
Lung	20	4
Lung	20	4
Lung	20	3
Lung	20	5
Lung	20	3
Lung	20	7
Lung	20	5
Lung	20	5
Lung	20	7
Lung	20	5
Lung	20	9
Lung	20	9
Lung	20	4
Lung	20	3
Lung	20	6
Lung	20	3
Lung	20	6
Lung	20	5
Lung	20	6
Lung	20	6
Lung	20	2
Lung	20	4
Lung	20	2
Lung	20	0
Lung	20	5
Lung	20	5
Lung	20	4
Lung	20	5
Lung	20	7
Lung	20	6
Lung	20	4
Lung	20	4
Lung	20	4
Lung	20	5
Lung	20	4
Lung	20	3
Lung	20	3
Lung	20	6
Lung	20	4
Lung	20	5
Lung	20	5
Lung	20	3
Lung	20	1
Lung	20	4
Lung	20	8
Lung	20	5
Lung	20	3
Lung	20	4
Lung	20	5
Lung	20	3
Lung	20	4
Lung	20	9
Lung	20	5
Lung	20	2
Lung	20	5
Lung	20	5
Lung	20	3
Lung	20	3
Lung	20	3
Lung	20	6
Lung	20	6
Lung	20	4
Lung	20	6
Lung	20	5
Lung	20	6
Lung	20	1
Lung	20	6
Lung	20	5
Lung	20	4
Lung	20	3
Lung	20	4
Lung	20	3
Lung	20	4
Lung	20	4
Lung	20	3
Lung	20	4
Lung	20	5
Lung	20	1
Lung	20	1
Lung	20	3
Lung	20	3
Lung	20	4
Lung	20	2
Lung	20	0
Lung	20	4
Lung	20	6
Lung	20	6
Lung	20	7
Lung	20	4
Lung	20	6
Lung	20	1
Lung	20	5
Lung	20	5
Lung	20	6
Lung	20	6
Lung	20	5
Lung	20	7
Lung	20	6
Lung	20	5
Lung	20	3
Lung	20	3
Lung	20	4
Lung	20	7
Lung	20	1
Lung	20	7
Lung	20	4
Lung	20	7
Lung	20	9
Lung	20	7
Lung	20	3
Lung	20	5
Lung	20	5
Lung	20	5
Lung	20	7
Lung	20	4
Lung	20	5
Lung	20	6
Lung	20	5
Lung	20	3
Lung	20	5
Lung	20	3
Lung	20	5
Lung	20	2
Lung	20	3
Lung	20	5
Lung	20	4
Lung	20	4
Lung	20	5
Lung	20	5
Lung	20	7
Lung	20	5
Lung	20	6
Lung	20	5
Lung	20	3
Lung	20	7
Lung	20	4
Lung	20	6
Lung	20	3
Lung	20	4
Lung	20	3
Lung	20	5
Lung	20	6
Lung	20	3
Lung	20	3
Lung	20	5
Lung	20	3
Lung	20	9
Lung	20	6
Lung	20	3
Lung	20	4
Lung	20	7
Lung	20	6
Lung	20	6
Lung	20	3
Lung	20	8
Lung	20	4
Lung	20	1
Lung	20	9
Lung	20	6
Lung	20	6
Lung	20	3
Lung	20	4
Lung	20	5
Lung	20	5
Lung	20	4
Lung	20	5
Lung	20	5
Lung	20	9
Lung	20	5
Lung	20	4
Lung	20	6
Lung	20	3
Lung	20	6
Lung	20	8
Lung	20	5
Lung	20	4
Lung	20	3
Lung	20	7
Lung	20	5
Lung	20	8
Lung	20	5
Lung	20	3
Lung	20	5
Lung	20	1
Lung	20	6
Lung	20	3
Lung	20	4
Lung	20	3
Lung	20	4
Lung	20	4
Lung	20	6
Lung	20	5
Lung	20	2
Lung	20	2
Lung	20	5
Lung	20	4
Lung	20	5
Lung	20	6
Lung	20	6
Lung	20	1
Lung	20	6
Lung	20	2
Lung	20	4
Lung	20	8
Lung	20	5
Lung	20	4
Lung	20	8
Lung	20	4
Lung	20	5
Lung	20	9
Lung	20	5
Lung	20	5
Lung	20	6
Lung	20	3
Lung	20	7
Lung	20	6
Lung	20	5
Lung	20	4
Lung	20	4
Lung	20	2
Lung	20	6
Lung	20	4
Lung	20	3
Lung	20	4
Lung	20	5
Lung	20	6
Lung	20	8
Lung	20	7
Lung	20	3
Lung	20	4
Lung	20	4
Lung	20	8
Lung	20	3
Lung	20	4
Lung	20	2
Lung	20	3
Lung	20	3
Lung	20	6
Lung	20	7
Lung	20	5
Lung	20	4
Lung	20	3
Lung	20	4
Lung	20	2
Lung	20	2
Lung	20	1
Lung	20	2
Lung	20	3
Lung	20	3
Lung	20	3
Lung	20	2
Lung	20	1
Lung	20	6
Lung	20	4
Lung	20	5
Lung	20	7
Lung	20	5
Lung	20	3
Lung	20	9
Lung	20	4
Lung	20	8
Lung	20	2
Lung	20	4
Lung	20	6
Lung	20	4
Lung	20	7
Lung	20	5
Lung	20	6
Lung	20	5
Lung	20	2
Lung	20	5
Lung	20	4
Lung	20	7
Lung	20	6
Lung	20	4
Lung	20	6
Lung	20	3
Lung	20	5
Lung	20	6
Lung	20	6
Lung	20	5
Lung	20	8
Lung	20	9
Lung	20	6
Lung	20	1
Lung	20	4
Lung	20	6
Lung	20	8
Lung	20	4
Lung	20	4
Lung	20	5
Lung	20	6
Lung	20	5
Lung	20	3
Lung	20	4
Lung	20	5
Lung	20	6
Lung	20	4
Lung	20	5
Lung	20	5
Lung	20	5
Lung	20	2
Lung	20	5
Lung	20	3
Lung	20	6
Lung	20	7
Lung	20	3
Lung	20	8
Lung	20	4
Lung	20	6
Lung	20	4
Lung	20	5
Lung	20	5
Lung	20	1
Lung	20	4
Lung	20	4
Lung	20	4
Lung	20	5
Lung	20	3
Lung	20	1
Lung	20	6
Lung	20	2
Lung	20	3
Lung	20	4
Lung	20	8
Lung	20	3
Lung	20	6
Lung	20	5
Lung	20	7
Lung	20	4
Lung	20	0
Lung	20	3
Lung	20	7
Lung	20	4
Lung	20	4
Lung	20	2
Lung	20	2
Lung	20	3
Lung	20	6
Lung	20	7
Lung	20	3
Lung	20	3
Lung	20	3
Lung	20	6
Lung	20	6
Lung	20	3
Lung	20	4
Lung	20	3
Lung	20	5
Lung	20	5
Lung	20	3
Lung	20	1
Lung	20	6
Lung	20	3
Lung	20	2
Lung	20	5
Lung	20	2
Lung	20	5
Lung	20	6
Lung	20	2
Lung	20	5
Lung	20	3
Lung	20	1
Lung	20	6
Lung	20	3
Lung	20	3
Lung	20	7
Lung	20	5
Lung	20	1
Lung	20	3
Lung	20	2
Lung	20	5
Lung	20	4
Lung	20	5
Lung	20	4
Lung	20	5
Lung	20	4
Lung	20	8
Lung	20	4
Lung	20	7
Lung	20	7
Lung	20	3
Lung	20	9
Lung	20	8
Lung	20	4
Lung	20	3
Lung	20	2
Lung	20	3
Lung	20	3
Lung	20	3
Lung	20	4
Lung	20	4
Lung	20	4
Lung	20	8
Lung	20	4
Lung	20	6
Lung	20	6
Lung	20	3
Lung	20	4
Lung	20	2
Lung	20	5
Lung	20	2
Lung	20	7
Lung	20	2
Lung	20	7
Lung	20	6
Lung	20	5
Lung	20	6
Lung	20	3
Lung	20	6
Lung	20	5
Lung	20	9
Lung	20	7
Lung	20	7
Lung	20	1
Lung	20	3
Lung	20	4
Lung	20	5
Lung	20	4
Lung	20	3
Lung	20	2
Lung	20	5
Lung	20	3
Lung	20	5
Lung	20	3
Lung	20	4
Lung	20	4
Lung	20	3
Lung	20	5
Lung	20	5
Lung	20	7
Lung	20	8
Lung	20	4
Lung	20	5
Lung	20	6
Lung	20	6
Lung	20	3
Lung	20	3
Lung	20	4
Lung	20	5
Lung	20	6
Lung	20	3
Lung	20	7
Lung	20	2
Lung	20	6
Lung	20	4
Lung	20	6
Lung	20	5
Lung	20	6
Lung	20	4
Lung	20	4
Lung	20	3
Lung	20	2
Lung	20	4
Lung	20	8
Lung	20	2
Lung	20	5
Lung	20	4
Lung	20	4
Lung	20	1
Lung	20	4
Lung	20	3
Lung	20	7
Lung	20	5
Lung	20	6
Lung	20	5
Lung	20	4
Lung	20	2
Lung	20	4
Lung	20	4
Lung	20	2
Lung	20	4
Lung	20	5
Lung	20	4
Lung	20	5
Lung	20	5
Lung	20	5
Lung	20	2
Lung	20	2
Lung	20	2
Lung	20	4
Lung	20	7
Lung	20	3
Lung	20	5
Lung	20	7
Lung	20	5
Lung	20	3
Lung	20	8
Lung	20	5
Lung	20	5
Lung	20	3
Lung	20	5
Lung	20	5
Lung	20	3
Lung	20	2
Lung	20	2
Lung	20	4
Lung	20	7
Lung	20	4
Lung	20	7
Lung	20	3
Lung	20	5
Lung	20	4
Lung	20	5
Lung	20	3
Lung	20	6
Lung	20	1
Lung	20	5
Lung	20	1
Lung	20	6
Lung	20	5
Lung	20	3
Lung	20	2
Lung	20	2
Lung	20	3
Lung	20	8
Lung	20	7
Lung	20	5
Lung	20	6
Lung	20	5
Lung	20	4
Lung	20	5
Lung	20	6
Lung	20	5
Lung	20	7
Lung	20	6
Lung	20	3
Lung	20	7
Lung	20	4
Lung	20	2
Lung	20	4
Lung	20	7
Lung	20	3
Lung	20	6
Lung	20	4
Lung	20	4
Lung	20	2
Lung	20	2
Lung	20	4
Lung	20	5
Lung	20	4
Lung	20	4
Lung	20	5
Lung	20	3
Lung	20	5
Lung	20	6
Lung	20	4
Lung	20	1
Lung	20	6
Lung	20	6
Lung	20	3
Lung	20	5
Lung	20	6
Lung	20	2
Lung	20	4
Lung	20	2
Lung	20	5
Lung	20	4
Lung	20	4
Lung	20	5
Lung	20	3
Lung	20	5
Lung	20	5
Lung	20	6
Lung	20	5
Lung	20	4
Lung	20	5
Lung	20	0
Lung	20	2
Lung	20	3
Lung	20	4
Lung	20	3
Lung	20	6
Lung	20	4
Lung	20	3
Lung	20	4
Lung	20	6
Lung	20	7
Lung	20	6
Lung	20	5
Lung	20	2
Lung	20	4
Lung	20	8
Lung	20	3
Lung	20	5
Lung	20	4
Lung	20	7
Lung	20	4
Lung	20	6
Lung	20	3
Lung	20	3
Lung	20	8
Lung	20	3
Lung	20	4
Lung	20	5
Lung	20	4
Lung	20	4
Lung	20	9
Lung	20	8
Lung	20	5
Lung	20	6
Lung	20	2
Lung	20	4
Lung	20	5
Lung	20	4
Lung	20	7
Lung	20	6
Lung	20	4
Lung	20	1
Lung	20	3
Lung	20	3
Lung	20	6
Lung	20	4
Lung	20	2
Lung	20	7
Lung	20	3
Lung	20	4
Lung	20	2
Lung	20	4
Lung	20	5
Lung	20	4
Lung	20	4
Lung	20	5
Lung	20	0
Lung	20	6
Lung	20	3
Lung	20	7
Lung	20	7
Lung	20	3
Lung	20	5
Lung	20	6
Lung	20	3
Lung	20	4
Lung	20	5
Lung	20	4
Lung	20	4
Lung	20	4
Lung	20	6
Lung	20	6
Lung	20	7
Lung	20	1
Lung	20	6
Lung	20	3
Lung	20	5
Lung	20	5
Lung	20	6
Lung	20	3
Lung	20	2
Lung	20	6
Lung	20	5
Lung	20	4
Lung	20	3
Lung	20	2
Lung	20	5
Lung	20	9
Lung	20	3
Lung	20	5
Lung	20	4
Lung	20	1
Lung	20	6
Lung	20	4
Lung	20	6
Lung	20	5
Lung	20	6
Lung	20	2
Lung	20	5
Lung	20	7
Lung	20	4
Lung	20	5
Lung	20	4
Lung	20	5
Lung	20	5
Lung	20	7
Lung	20	4
Lung	20	4
Lung	20	4
Lung	20	5
Lung	20	4
Lung	20	5
Lung	20	4
Lung	20	4
Lung	20	6
Lung	20	2
Lung	20	4
Lung	20	1
Lung	20	4
Lung	20	7
Lung	20	4
Lung	20	3
Lung	20	3
Lung	20	5
Lung	20	3
Lung	20	3
Lung	20	6
Lung	20	6
Lung	20	7
Lung	20	4
Lung	20	5
Lung	20	5
Lung	20	2
Lung	20	8
Lung	20	4
Lung	20	4
Lung	20	4
Lung	20	6
Lung	20	6
Lung	20	3
Lung	20	4
Lung	20	6
Lung	20	5
Lung	20	7
Lung	20	1
Lung	20	3
Lung	20	5
Lung	20	6
Lung	20	2
Lung	20	5
Lung	20	8
Lung	20	1
Lung	20	4
Lung	20	4
Lung	20	3
Lung	20	2
Lung	20	10
Lung	20	5
Lung	20	6
Lung	20	4
Lung	20	5
Lung	20	1
Lung	20	4
Lung	20	4
Lung	20	2
Lung	20	6
Lung	20	6
Lung	20	7
Lung	20	4
Lung	20	6
Lung	20	6
Lung	20	4
Lung	20	4
Lung	20	7
Lung	20	1
Lung	20	5
Lung	20	5
Lung	20	5
Lung	20	5
Lung	20	4
Lung	20	4
Lung	20	7
Lung	20	2
Lung	20	6
Lung	20	3
Lung	20	8
Lung	20	4
Lung	20	1
Lung	20	2
Lung	20	5
Lung	20	4
Lung	20	6
Lung	20	2
Lung	20	6
Lung	20	1
Lung	20	3
Lung	20	9
Lung	20	5
Lung	20	3
Lung	20	5
Lung	20	2
Lung	20	5
Lung	20	4
Lung	20	1
Lung	20	5
Lung	20	4
Lung	20	3
Lung	20	4
Lung	20	5
Lung	20	5
Lung	20	6
Lung	20	4
Lung	20	6
Lung	20	6
Lung	20	6
Lung	20	4
Lung	20	3
Lung	20	3
Lung	20	6
Lung	20	7
Lung	20	5
Lung	20	6
Lung	20	5
Lung	20	4
Lung	20	6
Lung	20	5
Lung	20	4
Lung	20	8
Lung	20	8
Lung	20	5
Lung	20	2
Lung	20	4
Lung	20	6
Lung	20	1
Lung	20	2
Lung	20	4
Lung	20	6
Lung	20	1
Lung	20	4
Lung	20	3
Lung	20	1
Lung	20	6
Lung	20	3
Lung	20	7
Lung	20	4
Lung	20	3
Lung	20	3
Lung	20	5
[truncated: 4,001 more rows]
