# Supplementary material for: Affected cell types for hundreds of Mendelian diseases revealed by analysis of human and mouse single-cell data
Source: eLife. 2024 Jan 10;13:e84613. doi: 10.7554/eLife.84613 (PMC10830129; doi:10.7554/eLife.84613)
Supplement: Figure 3—figure supplement 1—source data 1. [file elife-84613-fig3-figsupp1-data1.xlsx]

## Sheet: Figure 3–figure supplement 1
Affected tissue 1	Affected tissue 2	Human cell type 1	Human cell type 2	Matching (1=Yes, 0=No)	Number of diseases likely affecting both cell types
Skeletal muscle	Bone marrow	erythrocyte_Sk	erythrocyte_Bo	1	1
Skeletal muscle	Bone marrow	fast muscle cell_Sk	erythroid progenitor_Bo	0	1
Skeletal muscle	Bone marrow	fast muscle cell_Sk	myeloid progenitor_Bo	0	1
Skeletal muscle	Bone marrow	slow muscle cell_Sk	erythroid progenitor_Bo	0	1
Skeletal muscle	Bone marrow	slow muscle cell_Sk	myeloid progenitor_Bo	0	1
Skeletal muscle	Bone marrow	mature nk t cell_Sk	nampt neutrophil_Bo	0	1
Skeletal muscle	Bone marrow	mature nk t cell_Sk	neutrophil_Bo	0	1
Skeletal muscle	Bone marrow	cd4-positive, alpha-beta t cell_Sk	cd4-positive, alpha-beta t cell_Bo	0	2
Skeletal muscle	Bone marrow	cd4-positive, alpha-beta t cell_Sk	hematopoietic stem cell_Bo	0	1
Skeletal muscle	Bone marrow	cd8-positive, alpha-beta t cell_Sk	cd4-positive, alpha-beta t cell_Bo	0	1
Skeletal muscle	Bone marrow	cd8-positive, alpha-beta t cell_Sk	hematopoietic stem cell_Bo	0	1
Skeletal muscle	Bone marrow	mast cell_Sk	cd4-positive, alpha-beta t cell_Bo	0	1
Skeletal muscle	Bone marrow	mast cell_Sk	hematopoietic stem cell_Bo	0	1
Skeletal muscle	Bone marrow	mesothelial cell_Sk	cd4-positive, alpha-beta t cell_Bo	0	1
Skeletal muscle	Bone marrow	mesothelial cell_Sk	hematopoietic stem cell_Bo	0	1
Skeletal muscle	Bone marrow	tendon cell_Sk	erythrocyte_Bo	0	2
Skeletal muscle	Bone marrow	fast muscle cell_Sk	macrophage_Bo	0	1
Skeletal muscle	Bone marrow	t cell_Sk	cd4-positive, alpha-beta t cell_Bo	0	1
Skeletal muscle	Bone marrow	endothelial cell of vascular tree_Sk	cd24 neutrophil_Bo	0	1
Skeletal muscle	Bone marrow	endothelial cell of vascular tree_Sk	nampt neutrophil_Bo	0	1
Skeletal muscle	Bone marrow	endothelial cell of vascular tree_Sk	neutrophil_Bo	0	1
Skeletal muscle	Lung	mesenchymal stem cell_Sk	adventitial cell_Lu	0	2
Skeletal muscle	Lung	mesenchymal stem cell_Sk	alveolar fibroblast_Lu	0	2
Skeletal muscle	Lung	mesenchymal stem cell_Sk	pericyte cell_Lu	0	2
Skeletal muscle	Lung	mesenchymal stem cell_Sk	vascular associated smooth muscle cell_Lu	0	1
Skeletal muscle	Lung	tendon cell_Sk	adventitial cell_Lu	0	2
Skeletal muscle	Lung	tendon cell_Sk	alveolar fibroblast_Lu	0	2
Skeletal muscle	Lung	tendon cell_Sk	pericyte cell_Lu	0	1
Skeletal muscle	Lung	tendon cell_Sk	vascular associated smooth muscle cell_Lu	0	1
Skeletal muscle	Lung	macrophage_Sk	endothelial cell of lymphatic vessel_Lu	0	1
Skeletal muscle	Lung	cd4-positive, alpha-beta t cell_Sk	cd8-positive, alpha-beta t cell_Lu	0	1
Skeletal muscle	Lung	cd4-positive, alpha-beta t cell_Sk	nk cell_Lu	0	1
Skeletal muscle	Lung	t cell_Sk	cd8-positive, alpha-beta t cell_Lu	0	1
Skeletal muscle	Lung	t cell_Sk	nk cell_Lu	0	1
Skeletal muscle	Lung	endothelial cell of vascular tree_Sk	bronchial vessel endothelial cell_Lu	0	1
Skeletal muscle	Lung	endothelial cell of vascular tree_Sk	neutrophil_Lu	0	1
Skeletal muscle	Spleen	erythrocyte_Sk	erythrocyte_Sp	1	1
Skeletal muscle	Spleen	macrophage_Sk	classical monocyte_Sp	0	1
Skeletal muscle	Spleen	macrophage_Sk	macrophage_Sp	1	1
Skeletal muscle	Spleen	mature nk t cell_Sk	neutrophil_Sp	0	1
Skeletal muscle	Spleen	t cell_Sk	cd4-positive, alpha-beta memory t cell_Sp	0	1
Skeletal muscle	Spleen	t cell_Sk	naive thymus-derived cd4-positive, alpha-beta t cell_Sp	0	1
Skeletal muscle	Spleen	tendon cell_Sk	erythrocyte_Sp	0	1
Skeletal muscle	Tongue	capillary endothelial cell_Sk	tongue muscle cell_To	0	1
Skeletal muscle	Tongue	endothelial cell of vascular tree_Sk	vein endothelial cell_To	0	3
Skeletal muscle	Trachea	mesenchymal stem cell_Sk	fibroblast_Tr	0	1
Bone marrow	Lung	cd24 neutrophil_Bo	neutrophil_Lu	0	1
Bone marrow	Lung	nampt neutrophil_Bo	neutrophil_Lu	0	2
Bone marrow	Lung	neutrophil_Bo	neutrophil_Lu	1	2
Bone marrow	Lung	neutrophil_Bo	cd8-positive, alpha-beta t cell_Lu	0	1
Bone marrow	Lung	erythroid progenitor_Bo	capillary aerocyte_Lu	0	2
Bone marrow	Lung	erythroid progenitor_Bo	capillary endothelial cell_Lu	0	2
Bone marrow	Lung	erythroid progenitor_Bo	endothelial cell of artery_Lu	0	2
Bone marrow	Lung	erythroid progenitor_Bo	vein endothelial cell_Lu	0	2
Bone marrow	Lung	macrophage_Bo	intermediate monocyte_Lu	0	2
Bone marrow	Lung	macrophage_Bo	non-classical monocyte_Lu	0	2
Bone marrow	Lung	monocyte_Bo	intermediate monocyte_Lu	0	2
Bone marrow	Lung	monocyte_Bo	non-classical monocyte_Lu	0	2
Bone marrow	Lung	nampt neutrophil_Bo	classical monocyte_Lu	0	1
Bone marrow	Lung	nampt neutrophil_Bo	intermediate monocyte_Lu	0	1
Bone marrow	Lung	nampt neutrophil_Bo	macrophage_Lu	0	1
Bone marrow	Lung	nampt neutrophil_Bo	plasmacytoid dendritic cell_Lu	0	1
Bone marrow	Lung	neutrophil_Bo	classical monocyte_Lu	0	1
Bone marrow	Lung	neutrophil_Bo	intermediate monocyte_Lu	0	1
Bone marrow	Lung	neutrophil_Bo	macrophage_Lu	0	1
Bone marrow	Lung	neutrophil_Bo	plasmacytoid dendritic cell_Lu	0	1
Bone marrow	Lung	cd8-positive, alpha-beta t cell_Bo	b cell_Lu	0	1
Bone marrow	Lung	cd8-positive, alpha-beta t cell_Bo	cd8-positive, alpha-beta t cell_Lu	0	2
Bone marrow	Lung	cd4-positive, alpha-beta t cell_Bo	cd4-positive, alpha-beta t cell_Lu	0	3
Bone marrow	Lung	memory b cell_Bo	b cell_Lu	0	1
Bone marrow	Lung	naive b cell_Bo	b cell_Lu	0	1
Bone marrow	Lung	memory b cell_Bo	macrophage_Lu	0	1
Bone marrow	Lung	macrophage_Bo	classical monocyte_Lu	0	1
Bone marrow	Lung	monocyte_Bo	classical monocyte_Lu	0	1
Bone marrow	Lung	cd4-positive, alpha-beta t cell_Bo	cd8-positive, alpha-beta t cell_Lu	0	1
Bone marrow	Lung	erythroid progenitor_Bo	bronchial vessel endothelial cell_Lu	0	1
Bone marrow	Lung	erythroid progenitor_Bo	endothelial cell of lymphatic vessel_Lu	0	1
Bone marrow	Lung	erythroid progenitor_Bo	lung microvascular endothelial cell_Lu	0	1
Bone marrow	Spleen	myeloid progenitor_Bo	platelet_Sp	0	2
Bone marrow	Spleen	erythrocyte_Bo	erythrocyte_Sp	1	7
Bone marrow	Spleen	myeloid progenitor_Bo	plasmacytoid dendritic cell_Sp	0	1
Bone marrow	Spleen	nampt neutrophil_Bo	classical monocyte_Sp	0	1
Bone marrow	Spleen	nampt neutrophil_Bo	intermediate monocyte_Sp	0	1
Bone marrow	Spleen	nampt neutrophil_Bo	neutrophil_Sp	0	2
Bone marrow	Spleen	neutrophil_Bo	classical monocyte_Sp	0	1
Bone marrow	Spleen	neutrophil_Bo	intermediate monocyte_Sp	0	1
Bone marrow	Spleen	neutrophil_Bo	neutrophil_Sp	1	2
Bone marrow	Spleen	monocyte_Bo	macrophage_Sp	0	1
Bone marrow	Spleen	cd8-positive, alpha-beta t cell_Bo	regulatory t cell_Sp	0	2
Bone marrow	Spleen	cd4-positive, alpha-beta t cell_Bo	cd4-positive, alpha-beta memory t cell_Sp	0	1
Bone marrow	Spleen	cd4-positive, alpha-beta t cell_Bo	naive thymus-derived cd4-positive, alpha-beta t cell_Sp	0	1
Bone marrow	Spleen	cd8-positive, alpha-beta t cell_Bo	cd8-positive, alpha-beta memory t cell_Sp	0	1
Bone marrow	Spleen	cd8-positive, alpha-beta t cell_Bo	type i nk t cell_Sp	0	1
Bone marrow	Spleen	cd4-positive, alpha-beta t cell_Bo	naive thymus-derived cd8-positive, alpha-beta t cell_Sp	0	1
Bone marrow	Spleen	cd4-positive, alpha-beta t cell_Bo	regulatory t cell_Sp	0	1
Bone marrow	Spleen	nampt neutrophil_Bo	plasmacytoid dendritic cell_Sp	0	1
Bone marrow	Tongue	cd24 neutrophil_Bo	vein endothelial cell_To	0	1
Bone marrow	Tongue	nampt neutrophil_Bo	vein endothelial cell_To	0	1
Bone marrow	Tongue	neutrophil_Bo	vein endothelial cell_To	0	1
Bone marrow	Tongue	erythroid progenitor_Bo	capillary endothelial cell_To	0	1
Bone marrow	Tongue	erythroid progenitor_Bo	vein endothelial cell_To	0	1
Lung	Spleen	dendritic cell_Lu	cd141-positive myeloid dendritic cell_Sp	0	1
Lung	Spleen	classical monocyte_Lu	classical monocyte_Sp	0	1
Lung	Spleen	classical monocyte_Lu	intermediate monocyte_Sp	0	1
Lung	Spleen	classical monocyte_Lu	neutrophil_Sp	0	1
Lung	Spleen	intermediate monocyte_Lu	classical monocyte_Sp	0	1
Lung	Spleen	intermediate monocyte_Lu	intermediate monocyte_Sp	0	1
Lung	Spleen	intermediate monocyte_Lu	neutrophil_Sp	0	1
Lung	Spleen	macrophage_Lu	classical monocyte_Sp	0	1
Lung	Spleen	macrophage_Lu	intermediate monocyte_Sp	0	1
Lung	Spleen	macrophage_Lu	neutrophil_Sp	0	1
Lung	Spleen	neutrophil_Lu	classical monocyte_Sp	0	1
Lung	Spleen	neutrophil_Lu	intermediate monocyte_Sp	0	1
Lung	Spleen	neutrophil_Lu	neutrophil_Sp	1	2
Lung	Spleen	plasmacytoid dendritic cell_Lu	classical monocyte_Sp	0	1
Lung	Spleen	plasmacytoid dendritic cell_Lu	intermediate monocyte_Sp	0	1
Lung	Spleen	plasmacytoid dendritic cell_Lu	neutrophil_Sp	0	1
Lung	Spleen	adventitial cell_Lu	macrophage_Sp	0	1
Lung	Spleen	endothelial cell of lymphatic vessel_Lu	macrophage_Sp	0	2
Lung	Spleen	macrophage_Lu	macrophage_Sp	1	1
Lung	Spleen	lung ciliated cell_Lu	endothelial cell_Sp	0	1
Lung	Spleen	cd4-positive, alpha-beta t cell_Lu	cd4-positive, alpha-beta memory t cell_Sp	0	1
Lung	Spleen	cd4-positive, alpha-beta t cell_Lu	naive thymus-derived cd4-positive, alpha-beta t cell_Sp	0	1
Lung	Spleen	cd8-positive, alpha-beta t cell_Lu	regulatory t cell_Sp	0	2
Lung	Spleen	cd4-positive, alpha-beta t cell_Lu	naive thymus-derived cd8-positive, alpha-beta t cell_Sp	0	1
Lung	Spleen	endothelial cell of lymphatic vessel_Lu	classical monocyte_Sp	0	1
Lung	Spleen	cd4-positive, alpha-beta t cell_Lu	regulatory t cell_Sp	0	1
Lung	Tongue	neutrophil_Lu	vein endothelial cell_To	0	1
Lung	Tongue	capillary aerocyte_Lu	capillary endothelial cell_To	0	1
Lung	Tongue	capillary aerocyte_Lu	vein endothelial cell_To	0	1
Lung	Tongue	capillary endothelial cell_Lu	capillary endothelial cell_To	0	1
Lung	Tongue	capillary endothelial cell_Lu	vein endothelial cell_To	0	1
Lung	Tongue	endothelial cell of artery_Lu	capillary endothelial cell_To	0	1
Lung	Tongue	endothelial cell of artery_Lu	vein endothelial cell_To	0	1
Lung	Tongue	vein endothelial cell_Lu	capillary endothelial cell_To	0	1
Lung	Tongue	vein endothelial cell_Lu	vein endothelial cell_To	0	1
Lung	Tongue	mesothelial cell_Lu	basal cell_To	0	1
Lung	Trachea	pericyte cell_Lu	fibroblast_Tr	0	1
