# Supplementary material for: Affected cell types for hundreds of Mendelian diseases revealed by analysis of human and mouse single-cell data
Source: eLife. 2024 Jan 10;13:e84613. doi: 10.7554/eLife.84613 (PMC10830129; doi:10.7554/eLife.84613)
Supplement: Figure 3—source data 1. [file elife-84613-fig3-data1.xlsx]

## Sheet: Figure 3A
Number of affected tissues	Number of diseases with likely affected cell type
1	160
2	100
3	46
4	19
5	3
6	0

## Sheet: Figure 3B
Affected tissue 1	Affected tissue 2	Likely affected cell types	Random cell types (of tissue 1)	Random cell types (of tissue 2)
Spleen	Bone marrow	16	2	1
Spleen	Bone marrow	16	2	2
Spleen	Bone marrow	16	5	2
Spleen	Bone marrow	16	1	3
Spleen	Bone marrow	16	3	2
Spleen	Bone marrow	16	4	0
Spleen	Bone marrow	16	3	4
Spleen	Bone marrow	16	2	4
Spleen	Bone marrow	16	4	3
Spleen	Bone marrow	16	2	1
Spleen	Bone marrow	16	4	1
Spleen	Bone marrow	16	3	2
Spleen	Bone marrow	16	7	2
Spleen	Bone marrow	16	1	1
Spleen	Bone marrow	16	2	3
Spleen	Bone marrow	16	2	2
Spleen	Bone marrow	16	4	2
Spleen	Bone marrow	16	3	2
Spleen	Bone marrow	16	3	1
Spleen	Bone marrow	16	1	2
Spleen	Bone marrow	16	4	0
Spleen	Bone marrow	16	3	2
Spleen	Bone marrow	16	3	2
Spleen	Bone marrow	16	1	3
Spleen	Bone marrow	16	0	2
Spleen	Bone marrow	16	5	0
Spleen	Bone marrow	16	5	5
Spleen	Bone marrow	16	4	3
Spleen	Bone marrow	16	4	2
Spleen	Bone marrow	16	2	5
Spleen	Bone marrow	16	0	5
Spleen	Bone marrow	16	3	0
Spleen	Bone marrow	16	2	2
Spleen	Bone marrow	16	4	1
Spleen	Bone marrow	16	1	1
Spleen	Bone marrow	16	4	1
Spleen	Bone marrow	16	4	0
Spleen	Bone marrow	16	3	4
Spleen	Bone marrow	16	4	2
Spleen	Bone marrow	16	5	4
Spleen	Bone marrow	16	4	1
Spleen	Bone marrow	16	1	0
Spleen	Bone marrow	16	5	2
Spleen	Bone marrow	16	1	3
Spleen	Bone marrow	16	3	1
Spleen	Bone marrow	16	1	2
Spleen	Bone marrow	16	2	0
Spleen	Bone marrow	16	6	3
Spleen	Bone marrow	16	0	3
Spleen	Bone marrow	16	5	1
Spleen	Bone marrow	16	2	1
Spleen	Bone marrow	16	3	5
Spleen	Bone marrow	16	2	2
Spleen	Bone marrow	16	2	3
Spleen	Bone marrow	16	1	2
Spleen	Bone marrow	16	6	2
Spleen	Bone marrow	16	2	2
Spleen	Bone marrow	16	4	2
Spleen	Bone marrow	16	0	1
Spleen	Bone marrow	16	3	2
Spleen	Bone marrow	16	6	4
Spleen	Bone marrow	16	4	5
Spleen	Bone marrow	16	5	1
Spleen	Bone marrow	16	3	1
Spleen	Bone marrow	16	2	1
Spleen	Bone marrow	16	3	1
Spleen	Bone marrow	16	1	1
Spleen	Bone marrow	16	2	3
Spleen	Bone marrow	16	1	2
Spleen	Bone marrow	16	6	0
Spleen	Bone marrow	16	3	2
Spleen	Bone marrow	16	2	1
Spleen	Bone marrow	16	2	1
Spleen	Bone marrow	16	3	1
Spleen	Bone marrow	16	2	5
Spleen	Bone marrow	16	7	2
Spleen	Bone marrow	16	1	2
Spleen	Bone marrow	16	4	4
Spleen	Bone marrow	16	2	2
Spleen	Bone marrow	16	5	3
Spleen	Bone marrow	16	4	0
Spleen	Bone marrow	16	1	2
Spleen	Bone marrow	16	4	1
Spleen	Bone marrow	16	4	5
Spleen	Bone marrow	16	1	2
Spleen	Bone marrow	16	0	3
Spleen	Bone marrow	16	2	2
Spleen	Bone marrow	16	1	4
Spleen	Bone marrow	16	3	2
Spleen	Bone marrow	16	1	3
Spleen	Bone marrow	16	2	0
Spleen	Bone marrow	16	2	1
Spleen	Bone marrow	16	4	1
Spleen	Bone marrow	16	2	0
Spleen	Bone marrow	16	1	2
Spleen	Bone marrow	16	3	5
Spleen	Bone marrow	16	3	1
Spleen	Bone marrow	16	3	2
Spleen	Bone marrow	16	2	2
Spleen	Bone marrow	16	4	3
Spleen	Bone marrow	16	3	2
Spleen	Bone marrow	16	3	3
Spleen	Bone marrow	16	3	3
Spleen	Bone marrow	16	2	0
Spleen	Bone marrow	16	5	1
Spleen	Bone marrow	16	2	3
Spleen	Bone marrow	16	4	0
Spleen	Bone marrow	16	3	1
Spleen	Bone marrow	16	5	2
Spleen	Bone marrow	16	5	2
Spleen	Bone marrow	16	4	2
Spleen	Bone marrow	16	3	2
Spleen	Bone marrow	16	8	0
Spleen	Bone marrow	16	3	2
Spleen	Bone marrow	16	3	4
Spleen	Bone marrow	16	2	2
Spleen	Bone marrow	16	2	1
Spleen	Bone marrow	16	2	3
Spleen	Bone marrow	16	3	2
Spleen	Bone marrow	16	2	1
Spleen	Bone marrow	16	2	3
Spleen	Bone marrow	16	2	3
Spleen	Bone marrow	16	3	3
Spleen	Bone marrow	16	2	3
Spleen	Bone marrow	16	1	0
Spleen	Bone marrow	16	4	3
Spleen	Bone marrow	16	3	2
Spleen	Bone marrow	16	1	4
Spleen	Bone marrow	16	1	1
Spleen	Bone marrow	16	2	2
Spleen	Bone marrow	16	2	0
Spleen	Bone marrow	16	4	2
Spleen	Bone marrow	16	2	1
Spleen	Bone marrow	16	3	1
Spleen	Bone marrow	16	1	2
Spleen	Bone marrow	16	0	4
Spleen	Bone marrow	16	4	2
Spleen	Bone marrow	16	2	1
Spleen	Bone marrow	16	4	4
Spleen	Bone marrow	16	1	3
Spleen	Bone marrow	16	2	1
Spleen	Bone marrow	16	1	3
Spleen	Bone marrow	16	3	3
Spleen	Bone marrow	16	3	4
Spleen	Bone marrow	16	1	1
Spleen	Bone marrow	16	5	2
Spleen	Bone marrow	16	4	4
Spleen	Bone marrow	16	3	3
Spleen	Bone marrow	16	2	1
Spleen	Bone marrow	16	4	0
Spleen	Bone marrow	16	2	5
Spleen	Bone marrow	16	1	2
Spleen	Bone marrow	16	1	2
Spleen	Bone marrow	16	3	1
Spleen	Bone marrow	16	3	2
Spleen	Bone marrow	16	0	1
Spleen	Bone marrow	16	2	2
Spleen	Bone marrow	16	2	4
Spleen	Bone marrow	16	0	1
Spleen	Bone marrow	16	2	5
Spleen	Bone marrow	16	4	1
Spleen	Bone marrow	16	2	2
Spleen	Bone marrow	16	3	3
Spleen	Bone marrow	16	4	7
Spleen	Bone marrow	16	3	3
Spleen	Bone marrow	16	3	2
Spleen	Bone marrow	16	2	3
Spleen	Bone marrow	16	5	1
Spleen	Bone marrow	16	3	3
Spleen	Bone marrow	16	4	0
Spleen	Bone marrow	16	2	4
Spleen	Bone marrow	16	4	2
Spleen	Bone marrow	16	2	2
Spleen	Bone marrow	16	4	2
Spleen	Bone marrow	16	0	5
Spleen	Bone marrow	16	3	0
Spleen	Bone marrow	16	1	5
Spleen	Bone marrow	16	2	2
Spleen	Bone marrow	16	4	3
Spleen	Bone marrow	16	1	3
Spleen	Bone marrow	16	3	3
Spleen	Bone marrow	16	5	1
Spleen	Bone marrow	16	2	2
Spleen	Bone marrow	16	3	3
Spleen	Bone marrow	16	3	4
Spleen	Bone marrow	16	2	1
Spleen	Bone marrow	16	1	3
Spleen	Bone marrow	16	6	2
Spleen	Bone marrow	16	3	1
Spleen	Bone marrow	16	2	0
Spleen	Bone marrow	16	3	3
Spleen	Bone marrow	16	1	2
Spleen	Bone marrow	16	1	5
Spleen	Bone marrow	16	1	3
Spleen	Bone marrow	16	1	5
Spleen	Bone marrow	16	4	2
Spleen	Bone marrow	16	2	1
Spleen	Bone marrow	16	3	3
Spleen	Bone marrow	16	3	1
Spleen	Bone marrow	16	3	1
Spleen	Bone marrow	16	7	2
Spleen	Bone marrow	16	4	2
Spleen	Bone marrow	16	0	2
Spleen	Bone marrow	16	4	1
Spleen	Bone marrow	16	1	1
Spleen	Bone marrow	16	2	2
Spleen	Bone marrow	16	1	3
Spleen	Bone marrow	16	5	2
Spleen	Bone marrow	16	3	3
Spleen	Bone marrow	16	1	2
Spleen	Bone marrow	16	5	2
Spleen	Bone marrow	16	4	5
Spleen	Bone marrow	16	3	2
Spleen	Bone marrow	16	5	5
Spleen	Bone marrow	16	1	4
Spleen	Bone marrow	16	2	3
Spleen	Bone marrow	16	2	4
Spleen	Bone marrow	16	2	1
Spleen	Bone marrow	16	2	5
Spleen	Bone marrow	16	1	3
Spleen	Bone marrow	16	6	1
Spleen	Bone marrow	16	4	3
Spleen	Bone marrow	16	2	0
Spleen	Bone marrow	16	5	4
Spleen	Bone marrow	16	5	2
Spleen	Bone marrow	16	4	2
Spleen	Bone marrow	16	2	2
Spleen	Bone marrow	16	3	1
Spleen	Bone marrow	16	0	3
Spleen	Bone marrow	16	3	2
Spleen	Bone marrow	16	2	4
Spleen	Bone marrow	16	4	3
Spleen	Bone marrow	16	2	1
Spleen	Bone marrow	16	6	2
Spleen	Bone marrow	16	5	1
Spleen	Bone marrow	16	5	1
Spleen	Bone marrow	16	3	3
Spleen	Bone marrow	16	3	4
Spleen	Bone marrow	16	1	1
Spleen	Bone marrow	16	3	3
Spleen	Bone marrow	16	3	1
Spleen	Bone marrow	16	0	1
Spleen	Bone marrow	16	5	3
Spleen	Bone marrow	16	5	3
Spleen	Bone marrow	16	6	1
Spleen	Bone marrow	16	5	1
Spleen	Bone marrow	16	2	2
Spleen	Bone marrow	16	3	1
Spleen	Bone marrow	16	3	4
Spleen	Bone marrow	16	0	4
Spleen	Bone marrow	16	3	0
Spleen	Bone marrow	16	2	1
Spleen	Bone marrow	16	3	1
Spleen	Bone marrow	16	4	2
Spleen	Bone marrow	16	1	3
Spleen	Bone marrow	16	4	0
Spleen	Bone marrow	16	4	2
Spleen	Bone marrow	16	2	3
Spleen	Bone marrow	16	1	2
Spleen	Bone marrow	16	5	2
Spleen	Bone marrow	16	7	1
Spleen	Bone marrow	16	2	5
Spleen	Bone marrow	16	3	2
Spleen	Bone marrow	16	2	0
Spleen	Bone marrow	16	7	2
Spleen	Bone marrow	16	1	4
Spleen	Bone marrow	16	6	0
Spleen	Bone marrow	16	1	3
Spleen	Bone marrow	16	1	1
Spleen	Bone marrow	16	2	1
Spleen	Bone marrow	16	4	4
Spleen	Bone marrow	16	2	4
Spleen	Bone marrow	16	4	1
Spleen	Bone marrow	16	3	3
Spleen	Bone marrow	16	0	3
Spleen	Bone marrow	16	2	3
Spleen	Bone marrow	16	3	3
Spleen	Bone marrow	16	2	1
Spleen	Bone marrow	16	5	1
Spleen	Bone marrow	16	3	2
Spleen	Bone marrow	16	3	2
Spleen	Bone marrow	16	2	0
Spleen	Bone marrow	16	2	2
Spleen	Bone marrow	16	8	3
Spleen	Bone marrow	16	3	7
Spleen	Bone marrow	16	2	2
Spleen	Bone marrow	16	2	4
Spleen	Bone marrow	16	2	1
Spleen	Bone marrow	16	5	2
Spleen	Bone marrow	16	6	1
Spleen	Bone marrow	16	4	3
Spleen	Bone marrow	16	3	1
Spleen	Bone marrow	16	4	0
Spleen	Bone marrow	16	4	1
Spleen	Bone marrow	16	4	1
Spleen	Bone marrow	16	3	4
Spleen	Bone marrow	16	2	2
Spleen	Bone marrow	16	4	2
Spleen	Bone marrow	16	1	1
Spleen	Bone marrow	16	6	3
Spleen	Bone marrow	16	6	2
Spleen	Bone marrow	16	3	1
Spleen	Bone marrow	16	4	3
Spleen	Bone marrow	16	3	3
Spleen	Bone marrow	16	2	3
Spleen	Bone marrow	16	4	1
Spleen	Bone marrow	16	0	3
Spleen	Bone marrow	16	4	3
Spleen	Bone marrow	16	3	1
Spleen	Bone marrow	16	2	2
Spleen	Bone marrow	16	4	4
Spleen	Bone marrow	16	0	5
Spleen	Bone marrow	16	1	1
Spleen	Bone marrow	16	2	3
Spleen	Bone marrow	16	4	1
Spleen	Bone marrow	16	5	1
Spleen	Bone marrow	16	3	5
Spleen	Bone marrow	16	1	2
Spleen	Bone marrow	16	4	3
Spleen	Bone marrow	16	3	4
Spleen	Bone marrow	16	4	2
Spleen	Bone marrow	16	1	1
Spleen	Bone marrow	16	3	0
Spleen	Bone marrow	16	2	0
Spleen	Bone marrow	16	2	0
Spleen	Bone marrow	16	2	0
Spleen	Bone marrow	16	3	3
Spleen	Bone marrow	16	0	4
Spleen	Bone marrow	16	3	3
Spleen	Bone marrow	16	1	2
Spleen	Bone marrow	16	2	2
Spleen	Bone marrow	16	1	0
Spleen	Bone marrow	16	6	2
Spleen	Bone marrow	16	2	1
Spleen	Bone marrow	16	4	1
Spleen	Bone marrow	16	2	3
Spleen	Bone marrow	16	5	2
Spleen	Bone marrow	16	1	3
Spleen	Bone marrow	16	1	3
Spleen	Bone marrow	16	4	1
Spleen	Bone marrow	16	2	3
Spleen	Bone marrow	16	1	0
Spleen	Bone marrow	16	5	1
Spleen	Bone marrow	16	0	6
Spleen	Bone marrow	16	1	2
Spleen	Bone marrow	16	3	2
Spleen	Bone marrow	16	5	3
Spleen	Bone marrow	16	2	2
Spleen	Bone marrow	16	2	3
Spleen	Bone marrow	16	3	1
Spleen	Bone marrow	16	3	1
Spleen	Bone marrow	16	0	3
Spleen	Bone marrow	16	1	2
Spleen	Bone marrow	16	3	4
Spleen	Bone marrow	16	1	4
Spleen	Bone marrow	16	4	0
Spleen	Bone marrow	16	3	5
Spleen	Bone marrow	16	0	1
Spleen	Bone marrow	16	1	3
Spleen	Bone marrow	16	2	2
Spleen	Bone marrow	16	0	4
Spleen	Bone marrow	16	5	3
Spleen	Bone marrow	16	7	4
Spleen	Bone marrow	16	1	2
Spleen	Bone marrow	16	5	4
Spleen	Bone marrow	16	1	1
Spleen	Bone marrow	16	1	1
Spleen	Bone marrow	16	2	1
Spleen	Bone marrow	16	5	3
Spleen	Bone marrow	16	1	3
Spleen	Bone marrow	16	2	2
Spleen	Bone marrow	16	2	1
Spleen	Bone marrow	16	2	1
Spleen	Bone marrow	16	2	1
Spleen	Bone marrow	16	1	1
Spleen	Bone marrow	16	3	2
Spleen	Bone marrow	16	3	2
Spleen	Bone marrow	16	3	1
Spleen	Bone marrow	16	4	6
Spleen	Bone marrow	16	3	3
Spleen	Bone marrow	16	1	3
Spleen	Bone marrow	16	2	2
Spleen	Bone marrow	16	1	1
Spleen	Bone marrow	16	3	2
Spleen	Bone marrow	16	4	3
Spleen	Bone marrow	16	0	4
Spleen	Bone marrow	16	4	2
Spleen	Bone marrow	16	3	2
Spleen	Bone marrow	16	3	2
Spleen	Bone marrow	16	5	1
Spleen	Bone marrow	16	3	1
Spleen	Bone marrow	16	1	0
Spleen	Bone marrow	16	4	1
Spleen	Bone marrow	16	1	6
Spleen	Bone marrow	16	3	2
Spleen	Bone marrow	16	6	3
Spleen	Bone marrow	16	5	0
Spleen	Bone marrow	16	3	2
Spleen	Bone marrow	16	1	4
Spleen	Bone marrow	16	8	1
Spleen	Bone marrow	16	4	3
Spleen	Bone marrow	16	4	3
Spleen	Bone marrow	16	4	1
Spleen	Bone marrow	16	1	2
Spleen	Bone marrow	16	0	0
Spleen	Bone marrow	16	2	3
Spleen	Bone marrow	16	2	0
Spleen	Bone marrow	16	2	2
Spleen	Bone marrow	16	3	4
Spleen	Bone marrow	16	2	2
Spleen	Bone marrow	16	2	4
Spleen	Bone marrow	16	1	1
Spleen	Bone marrow	16	3	3
Spleen	Bone marrow	16	2	1
Spleen	Bone marrow	16	5	2
Spleen	Bone marrow	16	0	2
Spleen	Bone marrow	16	3	1
Spleen	Bone marrow	16	6	2
Spleen	Bone marrow	16	5	3
Spleen	Bone marrow	16	1	3
Spleen	Bone marrow	16	3	2
Spleen	Bone marrow	16	2	1
Spleen	Bone marrow	16	2	4
Spleen	Bone marrow	16	3	2
Spleen	Bone marrow	16	2	2
Spleen	Bone marrow	16	2	2
Spleen	Bone marrow	16	5	2
Spleen	Bone marrow	16	2	4
Spleen	Bone marrow	16	3	3
Spleen	Bone marrow	16	2	1
Spleen	Bone marrow	16	3	2
Spleen	Bone marrow	16	1	2
Spleen	Bone marrow	16	1	4
Spleen	Bone marrow	16	5	0
Spleen	Bone marrow	16	6	2
Spleen	Bone marrow	16	3	3
Spleen	Bone marrow	16	4	4
Spleen	Bone marrow	16	2	1
Spleen	Bone marrow	16	2	2
Spleen	Bone marrow	16	6	3
Spleen	Bone marrow	16	2	3
Spleen	Bone marrow	16	3	0
Spleen	Bone marrow	16	2	2
Spleen	Bone marrow	16	3	4
Spleen	Bone marrow	16	8	3
Spleen	Bone marrow	16	2	1
Spleen	Bone marrow	16	3	4
Spleen	Bone marrow	16	0	3
Spleen	Bone marrow	16	4	1
Spleen	Bone marrow	16	4	2
Spleen	Bone marrow	16	4	1
Spleen	Bone marrow	16	3	2
Spleen	Bone marrow	16	3	2
Spleen	Bone marrow	16	3	3
Spleen	Bone marrow	16	3	3
Spleen	Bone marrow	16	6	1
Spleen	Bone marrow	16	2	2
Spleen	Bone marrow	16	3	3
Spleen	Bone marrow	16	3	0
Spleen	Bone marrow	16	4	3
Spleen	Bone marrow	16	2	0
Spleen	Bone marrow	16	3	2
Spleen	Bone marrow	16	4	2
Spleen	Bone marrow	16	2	1
Spleen	Bone marrow	16	5	1
Spleen	Bone marrow	16	2	0
Spleen	Bone marrow	16	4	1
Spleen	Bone marrow	16	4	3
Spleen	Bone marrow	16	1	1
Spleen	Bone marrow	16	3	2
Spleen	Bone marrow	16	3	3
Spleen	Bone marrow	16	3	2
Spleen	Bone marrow	16	3	0
Spleen	Bone marrow	16	4	3
Spleen	Bone marrow	16	2	1
Spleen	Bone marrow	16	2	2
Spleen	Bone marrow	16	2	2
Spleen	Bone marrow	16	3	1
Spleen	Bone marrow	16	5	2
Spleen	Bone marrow	16	4	1
Spleen	Bone marrow	16	5	2
Spleen	Bone marrow	16	1	4
Spleen	Bone marrow	16	3	2
Spleen	Bone marrow	16	2	1
Spleen	Bone marrow	16	2	0
Spleen	Bone marrow	16	3	3
Spleen	Bone marrow	16	4	4
Spleen	Bone marrow	16	1	3
Spleen	Bone marrow	16	3	4
Spleen	Bone marrow	16	1	0
Spleen	Bone marrow	16	2	2
Spleen	Bone marrow	16	2	0
Spleen	Bone marrow	16	4	2
Spleen	Bone marrow	16	3	3
Spleen	Bone marrow	16	2	1
Spleen	Bone marrow	16	4	1
Spleen	Bone marrow	16	2	4
Spleen	Bone marrow	16	5	4
Spleen	Bone marrow	16	3	3
Spleen	Bone marrow	16	4	2
Spleen	Bone marrow	16	2	2
Spleen	Bone marrow	16	3	4
Spleen	Bone marrow	16	4	2
Spleen	Bone marrow	16	4	5
Spleen	Bone marrow	16	2	0
Spleen	Bone marrow	16	6	2
Spleen	Bone marrow	16	1	2
Spleen	Bone marrow	16	4	2
Spleen	Bone marrow	16	1	4
Spleen	Bone marrow	16	3	2
Spleen	Bone marrow	16	2	1
Spleen	Bone marrow	16	3	2
Spleen	Bone marrow	16	4	3
Spleen	Bone marrow	16	2	2
Spleen	Bone marrow	16	2	3
Spleen	Bone marrow	16	2	2
Spleen	Bone marrow	16	3	1
Spleen	Bone marrow	16	2	1
Spleen	Bone marrow	16	5	0
Spleen	Bone marrow	16	4	4
Spleen	Bone marrow	16	5	2
Spleen	Bone marrow	16	2	1
Spleen	Bone marrow	16	2	2
Spleen	Bone marrow	16	1	2
Spleen	Bone marrow	16	4	2
Spleen	Bone marrow	16	4	1
Spleen	Bone marrow	16	1	1
Spleen	Bone marrow	16	1	5
Spleen	Bone marrow	16	5	3
Spleen	Bone marrow	16	4	0
Spleen	Bone marrow	16	2	5
Spleen	Bone marrow	16	3	1
Spleen	Bone marrow	16	2	3
Spleen	Bone marrow	16	4	7
Spleen	Bone marrow	16	2	6
Spleen	Bone marrow	16	2	3
Spleen	Bone marrow	16	4	0
Spleen	Bone marrow	16	4	1
Spleen	Bone marrow	16	3	1
Spleen	Bone marrow	16	4	2
Spleen	Bone marrow	16	3	3
Spleen	Bone marrow	16	3	3
Spleen	Bone marrow	16	4	2
Spleen	Bone marrow	16	3	5
Spleen	Bone marrow	16	7	2
Spleen	Bone marrow	16	2	1
Spleen	Bone marrow	16	6	4
Spleen	Bone marrow	16	5	2
Spleen	Bone marrow	16	2	2
Spleen	Bone marrow	16	2	2
Spleen	Bone marrow	16	4	1
Spleen	Bone marrow	16	1	2
Spleen	Bone marrow	16	2	2
Spleen	Bone marrow	16	7	2
Spleen	Bone marrow	16	3	0
Spleen	Bone marrow	16	5	1
Spleen	Bone marrow	16	4	1
Spleen	Bone marrow	16	4	1
Spleen	Bone marrow	16	4	3
Spleen	Bone marrow	16	1	2
Spleen	Bone marrow	16	1	3
Spleen	Bone marrow	16	6	5
Spleen	Bone marrow	16	2	4
Spleen	Bone marrow	16	2	4
Spleen	Bone marrow	16	4	3
Spleen	Bone marrow	16	3	4
Spleen	Bone marrow	16	4	5
Spleen	Bone marrow	16	4	3
Spleen	Bone marrow	16	2	1
Spleen	Bone marrow	16	1	2
Spleen	Bone marrow	16	1	2
Spleen	Bone marrow	16	3	1
Spleen	Bone marrow	16	3	2
Spleen	Bone marrow	16	0	2
Spleen	Bone marrow	16	3	3
Spleen	Bone marrow	16	4	3
Spleen	Bone marrow	16	2	1
Spleen	Bone marrow	16	4	3
Spleen	Bone marrow	16	4	2
Spleen	Bone marrow	16	5	0
Spleen	Bone marrow	16	2	1
Spleen	Bone marrow	16	1	3
Spleen	Bone marrow	16	0	4
Spleen	Bone marrow	16	3	3
Spleen	Bone marrow	16	2	4
Spleen	Bone marrow	16	5	1
Spleen	Bone marrow	16	6	2
Spleen	Bone marrow	16	3	3
Spleen	Bone marrow	16	3	0
Spleen	Bone marrow	16	0	4
Spleen	Bone marrow	16	1	1
Spleen	Bone marrow	16	3	1
Spleen	Bone marrow	16	2	2
Spleen	Bone marrow	16	2	2
Spleen	Bone marrow	16	5	4
Spleen	Bone marrow	16	2	3
Spleen	Bone marrow	16	2	1
Spleen	Bone marrow	16	3	2
Spleen	Bone marrow	16	3	4
Spleen	Bone marrow	16	1	1
Spleen	Bone marrow	16	4	2
Spleen	Bone marrow	16	3	1
Spleen	Bone marrow	16	1	2
Spleen	Bone marrow	16	4	5
Spleen	Bone marrow	16	4	3
Spleen	Bone marrow	16	2	3
Spleen	Bone marrow	16	6	1
Spleen	Bone marrow	16	3	3
Spleen	Bone marrow	16	1	0
Spleen	Bone marrow	16	3	3
Spleen	Bone marrow	16	1	4
Spleen	Bone marrow	16	1	2
Spleen	Bone marrow	16	2	2
Spleen	Bone marrow	16	3	1
Spleen	Bone marrow	16	2	2
Spleen	Bone marrow	16	4	2
Spleen	Bone marrow	16	2	3
Spleen	Bone marrow	16	3	3
Spleen	Bone marrow	16	3	3
Spleen	Bone marrow	16	1	2
Spleen	Bone marrow	16	4	2
Spleen	Bone marrow	16	2	3
Spleen	Bone marrow	16	1	1
Spleen	Bone marrow	16	0	4
Spleen	Bone marrow	16	2	1
Spleen	Bone marrow	16	3	0
Spleen	Bone marrow	16	5	1
Spleen	Bone marrow	16	2	4
Spleen	Bone marrow	16	4	2
Spleen	Bone marrow	16	2	1
Spleen	Bone marrow	16	2	4
Spleen	Bone marrow	16	4	2
Spleen	Bone marrow	16	2	4
Spleen	Bone marrow	16	2	0
Spleen	Bone marrow	16	3	2
Spleen	Bone marrow	16	1	1
Spleen	Bone marrow	16	2	2
Spleen	Bone marrow	16	4	2
Spleen	Bone marrow	16	3	1
Spleen	Bone marrow	16	2	3
Spleen	Bone marrow	16	3	2
Spleen	Bone marrow	16	5	3
Spleen	Bone marrow	16	2	1
Spleen	Bone marrow	16	1	2
Spleen	Bone marrow	16	5	5
Spleen	Bone marrow	16	1	3
Spleen	Bone marrow	16	3	0
Spleen	Bone marrow	16	1	2
Spleen	Bone marrow	16	4	4
Spleen	Bone marrow	16	1	1
Spleen	Bone marrow	16	3	2
Spleen	Bone marrow	16	2	3
Spleen	Bone marrow	16	4	2
Spleen	Bone marrow	16	2	5
Spleen	Bone marrow	16	4	2
Spleen	Bone marrow	16	1	1
Spleen	Bone marrow	16	3	2
Spleen	Bone marrow	16	1	0
Spleen	Bone marrow	16	2	2
Spleen	Bone marrow	16	2	2
Spleen	Bone marrow	16	1	3
Spleen	Bone marrow	16	3	1
Spleen	Bone marrow	16	2	2
Spleen	Bone marrow	16	4	2
Spleen	Bone marrow	16	0	4
Spleen	Bone marrow	16	5	0
Spleen	Bone marrow	16	4	3
Spleen	Bone marrow	16	4	0
Spleen	Bone marrow	16	1	2
Spleen	Bone marrow	16	5	3
Spleen	Bone marrow	16	4	4
Spleen	Bone marrow	16	4	3
Spleen	Bone marrow	16	4	3
Spleen	Bone marrow	16	4	2
Spleen	Bone marrow	16	1	4
Spleen	Bone marrow	16	5	1
Spleen	Bone marrow	16	0	2
Spleen	Bone marrow	16	1	1
Spleen	Bone marrow	16	5	1
Spleen	Bone marrow	16	4	5
Spleen	Bone marrow	16	3	2
Spleen	Bone marrow	16	5	3
Spleen	Bone marrow	16	5	1
Spleen	Bone marrow	16	5	2
Spleen	Bone marrow	16	3	4
Spleen	Bone marrow	16	1	3
Spleen	Bone marrow	16	3	1
Spleen	Bone marrow	16	3	3
Spleen	Bone marrow	16	6	3
Spleen	Bone marrow	16	3	2
Spleen	Bone marrow	16	2	2
Spleen	Bone marrow	16	1	4
Spleen	Bone marrow	16	2	0
Spleen	Bone marrow	16	2	2
Spleen	Bone marrow	16	5	3
Spleen	Bone marrow	16	5	3
Spleen	Bone marrow	16	4	1
Spleen	Bone marrow	16	0	2
Spleen	Bone marrow	16	4	0
Spleen	Bone marrow	16	1	4
Spleen	Bone marrow	16	2	3
Spleen	Bone marrow	16	1	1
Spleen	Bone marrow	16	1	4
Spleen	Bone marrow	16	2	2
Spleen	Bone marrow	16	4	1
Spleen	Bone marrow	16	3	4
Spleen	Bone marrow	16	2	3
Spleen	Bone marrow	16	2	1
Spleen	Bone marrow	16	2	1
Spleen	Bone marrow	16	1	2
Spleen	Bone marrow	16	2	4
Spleen	Bone marrow	16	4	1
Spleen	Bone marrow	16	4	4
Spleen	Bone marrow	16	2	2
Spleen	Bone marrow	16	1	1
Spleen	Bone marrow	16	4	1
Spleen	Bone marrow	16	5	2
Spleen	Bone marrow	16	5	1
Spleen	Bone marrow	16	2	3
Spleen	Bone marrow	16	2	2
Spleen	Bone marrow	16	3	1
Spleen	Bone marrow	16	4	1
Spleen	Bone marrow	16	2	2
Spleen	Bone marrow	16	3	4
Spleen	Bone marrow	16	1	1
Spleen	Bone marrow	16	4	3
Spleen	Bone marrow	16	5	3
Spleen	Bone marrow	16	1	3
Spleen	Bone marrow	16	4	1
Spleen	Bone marrow	16	1	2
Spleen	Bone marrow	16	4	0
Spleen	Bone marrow	16	0	1
Spleen	Bone marrow	16	5	3
Spleen	Bone marrow	16	2	2
Spleen	Bone marrow	16	3	4
Spleen	Bone marrow	16	5	3
Spleen	Bone marrow	16	3	1
Spleen	Bone marrow	16	4	2
Spleen	Bone marrow	16	3	2
Spleen	Bone marrow	16	4	1
Spleen	Bone marrow	16	3	1
Spleen	Bone marrow	16	4	1
Spleen	Bone marrow	16	2	2
Spleen	Bone marrow	16	4	2
Spleen	Bone marrow	16	2	4
Spleen	Bone marrow	16	4	2
Spleen	Bone marrow	16	4	2
Spleen	Bone marrow	16	2	2
Spleen	Bone marrow	16	1	3
Spleen	Bone marrow	16	2	2
Spleen	Bone marrow	16	4	2
Spleen	Bone marrow	16	2	2
Spleen	Bone marrow	16	6	2
Spleen	Bone marrow	16	1	2
Spleen	Bone marrow	16	2	2
Spleen	Bone marrow	16	2	1
Spleen	Bone marrow	16	2	2
Spleen	Bone marrow	16	3	2
Spleen	Bone marrow	16	0	3
Spleen	Bone marrow	16	3	2
Spleen	Bone marrow	16	3	3
Spleen	Bone marrow	16	5	1
Spleen	Bone marrow	16	3	3
Spleen	Bone marrow	16	2	4
Spleen	Bone marrow	16	4	1
Spleen	Bone marrow	16	3	2
Spleen	Bone marrow	16	4	2
Spleen	Bone marrow	16	3	2
Spleen	Bone marrow	16	3	1
Spleen	Bone marrow	16	2	2
Spleen	Bone marrow	16	3	3
Spleen	Bone marrow	16	2	1
Spleen	Bone marrow	16	0	2
Spleen	Bone marrow	16	5	2
Spleen	Bone marrow	16	2	1
Spleen	Bone marrow	16	2	2
Spleen	Bone marrow	16	3	2
Spleen	Bone marrow	16	6	1
Spleen	Bone marrow	16	2	1
Spleen	Bone marrow	16	2	2
Spleen	Bone marrow	16	3	3
Spleen	Bone marrow	16	4	1
Spleen	Bone marrow	16	3	2
Spleen	Bone marrow	16	2	4
Spleen	Bone marrow	16	4	2
Spleen	Bone marrow	16	1	3
Spleen	Bone marrow	16	3	2
Spleen	Bone marrow	16	1	1
Spleen	Bone marrow	16	4	1
Spleen	Bone marrow	16	2	2
Spleen	Bone marrow	16	4	2
Spleen	Bone marrow	16	7	2
Spleen	Bone marrow	16	4	2
Spleen	Bone marrow	16	5	3
Spleen	Bone marrow	16	4	2
Spleen	Bone marrow	16	4	3
Spleen	Bone marrow	16	2	5
Spleen	Bone marrow	16	1	2
Spleen	Bone marrow	16	2	3
Spleen	Bone marrow	16	5	1
Spleen	Bone marrow	16	4	2
Spleen	Bone marrow	16	1	3
Spleen	Bone marrow	16	2	2
Spleen	Bone marrow	16	3	2
Spleen	Bone marrow	16	4	1
Spleen	Bone marrow	16	3	0
Spleen	Bone marrow	16	4	2
Spleen	Bone marrow	16	6	3
Spleen	Bone marrow	16	3	1
Spleen	Bone marrow	16	5	1
Spleen	Bone marrow	16	1	1
Spleen	Bone marrow	16	1	3
Spleen	Bone marrow	16	2	2
Spleen	Bone marrow	16	2	2
Spleen	Bone marrow	16	3	2
Spleen	Bone marrow	16	2	2
Spleen	Bone marrow	16	1	2
Spleen	Bone marrow	16	3	1
Spleen	Bone marrow	16	3	3
Spleen	Bone marrow	16	3	5
Spleen	Bone marrow	16	2	3
Spleen	Bone marrow	16	1	3
Spleen	Bone marrow	16	1	1
Spleen	Bone marrow	16	4	1
Spleen	Bone marrow	16	2	4
Spleen	Bone marrow	16	0	2
Spleen	Bone marrow	16	2	4
Spleen	Bone marrow	16	3	6
Spleen	Bone marrow	16	5	3
Spleen	Bone marrow	16	3	5
Spleen	Bone marrow	16	2	2
Spleen	Bone marrow	16	3	0
Spleen	Bone marrow	16	5	1
Spleen	Bone marrow	16	3	3
Spleen	Bone marrow	16	3	0
Spleen	Bone marrow	16	4	3
Spleen	Bone marrow	16	3	2
Spleen	Bone marrow	16	3	2
Spleen	Bone marrow	16	3	2
Spleen	Bone marrow	16	3	2
Spleen	Bone marrow	16	2	1
Spleen	Bone marrow	16	3	3
Spleen	Bone marrow	16	4	3
Spleen	Bone marrow	16	3	2
Spleen	Bone marrow	16	2	3
Spleen	Bone marrow	16	3	2
Spleen	Bone marrow	16	3	2
Spleen	Bone marrow	16	2	1
Spleen	Bone marrow	16	3	2
Spleen	Bone marrow	16	3	1
Spleen	Bone marrow	16	2	2
Spleen	Bone marrow	16	2	3
Spleen	Bone marrow	16	3	5
Spleen	Bone marrow	16	3	3
Spleen	Bone marrow	16	4	1
Spleen	Bone marrow	16	8	1
Spleen	Bone marrow	16	1	3
Spleen	Bone marrow	16	2	2
Spleen	Bone marrow	16	2	3
Spleen	Bone marrow	16	2	3
Spleen	Bone marrow	16	1	4
Spleen	Bone marrow	16	2	3
Spleen	Bone marrow	16	5	2
Spleen	Bone marrow	16	2	2
Spleen	Bone marrow	16	0	0
Spleen	Bone marrow	16	0	3
Spleen	Bone marrow	16	5	0
Spleen	Bone marrow	16	1	2
Spleen	Bone marrow	16	1	3
Spleen	Bone marrow	16	4	1
Spleen	Bone marrow	16	5	3
Spleen	Bone marrow	16	2	7
Spleen	Bone marrow	16	4	2
Spleen	Bone marrow	16	4	1
Spleen	Bone marrow	16	2	1
Spleen	Bone marrow	16	4	5
Spleen	Bone marrow	16	4	1
Spleen	Bone marrow	16	2	1
Spleen	Bone marrow	16	9	1
Spleen	Bone marrow	16	1	3
Spleen	Bone marrow	16	3	3
Spleen	Bone marrow	16	0	1
Spleen	Bone marrow	16	3	2
Spleen	Bone marrow	16	2	4
Spleen	Bone marrow	16	2	0
Spleen	Bone marrow	16	3	5
Spleen	Bone marrow	16	1	1
Spleen	Bone marrow	16	3	1
Spleen	Bone marrow	16	2	2
Spleen	Bone marrow	16	5	3
Spleen	Bone marrow	16	3	1
Spleen	Bone marrow	16	4	3
Spleen	Bone marrow	16	2	3
Spleen	Bone marrow	16	3	1
Spleen	Bone marrow	16	2	4
Spleen	Bone marrow	16	5	2
Spleen	Bone marrow	16	2	3
Spleen	Bone marrow	16	3	2
Spleen	Bone marrow	16	5	3
Spleen	Bone marrow	16	3	1
Spleen	Bone marrow	16	1	2
Spleen	Bone marrow	16	0	2
Spleen	Bone marrow	16	2	2
Spleen	Bone marrow	16	2	1
Spleen	Bone marrow	16	2	4
Spleen	Bone marrow	16	3	1
Spleen	Bone marrow	16	3	3
Spleen	Bone marrow	16	2	2
Spleen	Bone marrow	16	2	3
Spleen	Bone marrow	16	2	4
Spleen	Bone marrow	16	4	1
Spleen	Bone marrow	16	5	3
Spleen	Bone marrow	16	2	2
Spleen	Bone marrow	16	3	1
Spleen	Bone marrow	16	3	2
Spleen	Bone marrow	16	4	1
Spleen	Bone marrow	16	6	5
Spleen	Bone marrow	16	4	1
Spleen	Bone marrow	16	2	2
Spleen	Bone marrow	16	3	1
Spleen	Bone marrow	16	3	2
Spleen	Bone marrow	16	5	2
Spleen	Bone marrow	16	2	2
Spleen	Bone marrow	16	3	3
Spleen	Bone marrow	16	3	2
Spleen	Bone marrow	16	1	4
Spleen	Bone marrow	16	3	0
Spleen	Bone marrow	16	1	3
Spleen	Bone marrow	16	4	2
Spleen	Bone marrow	16	2	5
Spleen	Bone marrow	16	7	0
Spleen	Bone marrow	16	3	2
Spleen	Bone marrow	16	4	1
Spleen	Bone marrow	16	1	4
Spleen	Bone marrow	16	3	2
Spleen	Bone marrow	16	1	6
Spleen	Bone marrow	16	2	2
Spleen	Bone marrow	16	2	2
Spleen	Bone marrow	16	2	3
Spleen	Bone marrow	16	2	3
Spleen	Bone marrow	16	5	0
Spleen	Bone marrow	16	3	3
Spleen	Bone marrow	16	5	0
Spleen	Bone marrow	16	4	2
Spleen	Bone marrow	16	2	3
Spleen	Bone marrow	16	4	2
Spleen	Bone marrow	16	0	2
Spleen	Bone marrow	16	3	3
Spleen	Bone marrow	16	1	5
Spleen	Bone marrow	16	4	3
Spleen	Bone marrow	16	4	1
Spleen	Bone marrow	16	3	2
Spleen	Bone marrow	16	3	3
Spleen	Bone marrow	16	3	2
Spleen	Bone marrow	16	3	2
Spleen	Bone marrow	16	2	6
Spleen	Bone marrow	16	2	3
Spleen	Bone marrow	16	2	1
Spleen	Bone marrow	16	5	1
Spleen	Bone marrow	16	5	0
Spleen	Bone marrow	16	2	1
Spleen	Bone marrow	16	2	1
Spleen	Bone marrow	16	3	3
Spleen	Bone marrow	16	4	2
Spleen	Bone marrow	16	4	2
Spleen	Bone marrow	16	1	1
Spleen	Bone marrow	16	2	0
Spleen	Bone marrow	16	1	4
Spleen	Bone marrow	16	4	2
Spleen	Bone marrow	16	2	1
Spleen	Bone marrow	16	1	2
Spleen	Bone marrow	16	4	1
Spleen	Bone marrow	16	3	4
Spleen	Bone marrow	16	4	0
Spleen	Bone marrow	16	3	3
Spleen	Bone marrow	16	2	4
Spleen	Bone marrow	16	4	2
Spleen	Bone marrow	16	2	3
Spleen	Bone marrow	16	1	1
Spleen	Bone marrow	16	4	3
Spleen	Bone marrow	16	3	1
Spleen	Bone marrow	16	5	4
Spleen	Bone marrow	16	4	1
Spleen	Bone marrow	16	2	3
Spleen	Bone marrow	16	2	4
Spleen	Bone marrow	16	2	5
Spleen	Bone marrow	16	1	2
Spleen	Bone marrow	16	2	0
Spleen	Bone marrow	16	9	2
Spleen	Bone marrow	16	6	4
Spleen	Bone marrow	16	2	4
Spleen	Bone marrow	16	2	3
Spleen	Bone marrow	16	3	0
Spleen	Bone marrow	16	5	1
Spleen	Bone marrow	16	5	1
Spleen	Bone marrow	16	1	4
Spleen	Bone marrow	16	4	5
Spleen	Bone marrow	16	5	1
Spleen	Bone marrow	16	4	1
Spleen	Bone marrow	16	3	6
Lung	Bone marrow	11	2	1
Lung	Bone marrow	11	2	0
Lung	Bone marrow	11	4	5
Lung	Bone marrow	11	1	3
Lung	Bone marrow	11	4	1
Lung	Bone marrow	11	4	2
Lung	Bone marrow	11	4	2
Lung	Bone marrow	11	3	1
Lung	Bone marrow	11	2	2
Lung	Bone marrow	11	4	1
Lung	Bone marrow	11	6	0
Lung	Bone marrow	11	4	2
Lung	Bone marrow	11	3	2
Lung	Bone marrow	11	7	0
Lung	Bone marrow	11	5	3
Lung	Bone marrow	11	1	4
Lung	Bone marrow	11	0	2
Lung	Bone marrow	11	3	0
Lung	Bone marrow	11	3	4
Lung	Bone marrow	11	2	2
Lung	Bone marrow	11	4	4
Lung	Bone marrow	11	4	4
Lung	Bone marrow	11	1	2
Lung	Bone marrow	11	4	1
Lung	Bone marrow	11	1	3
Lung	Bone marrow	11	2	2
Lung	Bone marrow	11	5	1
Lung	Bone marrow	11	3	1
Lung	Bone marrow	11	2	2
Lung	Bone marrow	11	3	1
Lung	Bone marrow	11	3	3
Lung	Bone marrow	11	5	2
Lung	Bone marrow	11	4	1
Lung	Bone marrow	11	4	0
Lung	Bone marrow	11	3	1
Lung	Bone marrow	11	3	1
Lung	Bone marrow	11	2	1
Lung	Bone marrow	11	2	1
Lung	Bone marrow	11	3	1
Lung	Bone marrow	11	4	4
Lung	Bone marrow	11	7	2
Lung	Bone marrow	11	2	1
Lung	Bone marrow	11	2	2
Lung	Bone marrow	11	3	0
Lung	Bone marrow	11	1	2
Lung	Bone marrow	11	7	1
Lung	Bone marrow	11	4	1
Lung	Bone marrow	11	2	1
Lung	Bone marrow	11	3	1
Lung	Bone marrow	11	3	1
Lung	Bone marrow	11	2	1
Lung	Bone marrow	11	4	3
Lung	Bone marrow	11	3	4
Lung	Bone marrow	11	5	1
Lung	Bone marrow	11	6	0
Lung	Bone marrow	11	2	5
Lung	Bone marrow	11	6	0
Lung	Bone marrow	11	1	0
Lung	Bone marrow	11	1	2
Lung	Bone marrow	11	2	2
Lung	Bone marrow	11	4	3
Lung	Bone marrow	11	0	1
Lung	Bone marrow	11	4	1
Lung	Bone marrow	11	1	1
Lung	Bone marrow	11	4	2
Lung	Bone marrow	11	4	4
Lung	Bone marrow	11	3	2
Lung	Bone marrow	11	4	6
Lung	Bone marrow	11	3	2
Lung	Bone marrow	11	5	2
Lung	Bone marrow	11	4	2
Lung	Bone marrow	11	4	0
Lung	Bone marrow	11	1	0
Lung	Bone marrow	11	3	3
Lung	Bone marrow	11	2	1
Lung	Bone marrow	11	0	1
Lung	Bone marrow	11	1	0
Lung	Bone marrow	11	5	3
Lung	Bone marrow	11	5	2
Lung	Bone marrow	11	3	1
Lung	Bone marrow	11	1	1
Lung	Bone marrow	11	4	1
Lung	Bone marrow	11	4	1
Lung	Bone marrow	11	2	1
Lung	Bone marrow	11	2	3
Lung	Bone marrow	11	3	2
Lung	Bone marrow	11	2	2
Lung	Bone marrow	11	4	4
Lung	Bone marrow	11	5	1
Lung	Bone marrow	11	1	0
Lung	Bone marrow	11	5	3
Lung	Bone marrow	11	2	5
Lung	Bone marrow	11	2	3
Lung	Bone marrow	11	5	1
Lung	Bone marrow	11	3	2
Lung	Bone marrow	11	2	1
Lung	Bone marrow	11	0	1
Lung	Bone marrow	11	4	1
Lung	Bone marrow	11	1	0
Lung	Bone marrow	11	4	0
Lung	Bone marrow	11	4	5
Lung	Bone marrow	11	2	3
Lung	Bone marrow	11	1	3
Lung	Bone marrow	11	2	2
Lung	Bone marrow	11	3	3
Lung	Bone marrow	11	4	5
Lung	Bone marrow	11	4	1
Lung	Bone marrow	11	3	1
Lung	Bone marrow	11	3	3
Lung	Bone marrow	11	5	2
Lung	Bone marrow	11	2	2
Lung	Bone marrow	11	5	0
Lung	Bone marrow	11	3	2
Lung	Bone marrow	11	2	3
Lung	Bone marrow	11	5	1
Lung	Bone marrow	11	6	2
Lung	Bone marrow	11	3	1
Lung	Bone marrow	11	2	1
Lung	Bone marrow	11	2	1
Lung	Bone marrow	11	5	1
Lung	Bone marrow	11	5	1
Lung	Bone marrow	11	3	4
Lung	Bone marrow	11	3	0
Lung	Bone marrow	11	4	0
Lung	Bone marrow	11	0	1
Lung	Bone marrow	11	1	0
Lung	Bone marrow	11	5	4
Lung	Bone marrow	11	6	1
Lung	Bone marrow	11	3	3
Lung	Bone marrow	11	3	2
Lung	Bone marrow	11	2	2
Lung	Bone marrow	11	6	3
Lung	Bone marrow	11	3	3
Lung	Bone marrow	11	5	4
Lung	Bone marrow	11	2	2
Lung	Bone marrow	11	3	2
Lung	Bone marrow	11	4	3
Lung	Bone marrow	11	3	3
Lung	Bone marrow	11	2	3
Lung	Bone marrow	11	5	0
Lung	Bone marrow	11	4	3
Lung	Bone marrow	11	2	3
Lung	Bone marrow	11	3	3
Lung	Bone marrow	11	3	2
Lung	Bone marrow	11	5	1
Lung	Bone marrow	11	4	0
Lung	Bone marrow	11	5	1
Lung	Bone marrow	11	4	0
Lung	Bone marrow	11	4	1
Lung	Bone marrow	11	2	2
Lung	Bone marrow	11	4	2
Lung	Bone marrow	11	3	0
Lung	Bone marrow	11	3	3
Lung	Bone marrow	11	3	1
Lung	Bone marrow	11	5	1
Lung	Bone marrow	11	3	1
Lung	Bone marrow	11	2	4
Lung	Bone marrow	11	3	1
Lung	Bone marrow	11	2	3
Lung	Bone marrow	11	4	2
Lung	Bone marrow	11	2	2
Lung	Bone marrow	11	2	1
Lung	Bone marrow	11	2	3
Lung	Bone marrow	11	1	0
Lung	Bone marrow	11	7	1
Lung	Bone marrow	11	3	2
Lung	Bone marrow	11	5	2
Lung	Bone marrow	11	7	2
Lung	Bone marrow	11	4	2
Lung	Bone marrow	11	3	3
Lung	Bone marrow	11	5	1
Lung	Bone marrow	11	4	2
Lung	Bone marrow	11	5	2
Lung	Bone marrow	11	4	3
Lung	Bone marrow	11	4	0
Lung	Bone marrow	11	2	1
Lung	Bone marrow	11	0	1
Lung	Bone marrow	11	3	3
Lung	Bone marrow	11	0	1
Lung	Bone marrow	11	1	1
Lung	Bone marrow	11	1	1
Lung	Bone marrow	11	1	0
Lung	Bone marrow	11	4	2
Lung	Bone marrow	11	2	1
Lung	Bone marrow	11	3	1
Lung	Bone marrow	11	2	3
Lung	Bone marrow	11	2	1
Lung	Bone marrow	11	2	3
Lung	Bone marrow	11	1	3
Lung	Bone marrow	11	2	2
Lung	Bone marrow	11	4	2
Lung	Bone marrow	11	3	2
Lung	Bone marrow	11	5	1
Lung	Bone marrow	11	3	2
Lung	Bone marrow	11	2	1
Lung	Bone marrow	11	2	1
Lung	Bone marrow	11	4	0
Lung	Bone marrow	11	2	3
Lung	Bone marrow	11	4	1
Lung	Bone marrow	11	2	1
Lung	Bone marrow	11	4	2
Lung	Bone marrow	11	1	0
Lung	Bone marrow	11	3	3
Lung	Bone marrow	11	2	1
Lung	Bone marrow	11	1	2
Lung	Bone marrow	11	3	3
Lung	Bone marrow	11	3	2
Lung	Bone marrow	11	3	4
Lung	Bone marrow	11	5	2
Lung	Bone marrow	11	3	1
Lung	Bone marrow	11	3	4
Lung	Bone marrow	11	4	3
Lung	Bone marrow	11	4	3
Lung	Bone marrow	11	4	2
Lung	Bone marrow	11	2	1
Lung	Bone marrow	11	4	2
Lung	Bone marrow	11	2	0
Lung	Bone marrow	11	3	3
Lung	Bone marrow	11	6	1
Lung	Bone marrow	11	4	2
Lung	Bone marrow	11	2	2
Lung	Bone marrow	11	2	2
Lung	Bone marrow	11	5	2
Lung	Bone marrow	11	3	4
Lung	Bone marrow	11	1	2
Lung	Bone marrow	11	4	2
Lung	Bone marrow	11	3	3
Lung	Bone marrow	11	4	0
Lung	Bone marrow	11	2	2
Lung	Bone marrow	11	3	2
Lung	Bone marrow	11	3	1
Lung	Bone marrow	11	3	3
Lung	Bone marrow	11	1	1
Lung	Bone marrow	11	3	1
Lung	Bone marrow	11	3	3
Lung	Bone marrow	11	2	3
Lung	Bone marrow	11	2	1
Lung	Bone marrow	11	3	4
Lung	Bone marrow	11	2	1
Lung	Bone marrow	11	4	5
Lung	Bone marrow	11	3	2
Lung	Bone marrow	11	4	3
Lung	Bone marrow	11	5	4
Lung	Bone marrow	11	0	3
Lung	Bone marrow	11	0	2
Lung	Bone marrow	11	3	3
Lung	Bone marrow	11	1	2
Lung	Bone marrow	11	2	1
Lung	Bone marrow	11	2	2
Lung	Bone marrow	11	4	2
Lung	Bone marrow	11	4	1
Lung	Bone marrow	11	3	2
Lung	Bone marrow	11	2	1
Lung	Bone marrow	11	2	0
Lung	Bone marrow	11	1	2
Lung	Bone marrow	11	3	3
Lung	Bone marrow	11	2	3
Lung	Bone marrow	11	4	2
Lung	Bone marrow	11	3	0
Lung	Bone marrow	11	5	3
Lung	Bone marrow	11	4	2
Lung	Bone marrow	11	2	0
Lung	Bone marrow	11	3	2
Lung	Bone marrow	11	3	0
Lung	Bone marrow	11	4	2
Lung	Bone marrow	11	2	2
Lung	Bone marrow	11	2	4
Lung	Bone marrow	11	3	2
Lung	Bone marrow	11	5	4
Lung	Bone marrow	11	4	2
Lung	Bone marrow	11	2	3
Lung	Bone marrow	11	5	2
Lung	Bone marrow	11	1	0
Lung	Bone marrow	11	3	0
Lung	Bone marrow	11	1	1
Lung	Bone marrow	11	3	3
Lung	Bone marrow	11	3	1
Lung	Bone marrow	11	7	0
Lung	Bone marrow	11	1	2
Lung	Bone marrow	11	6	0
Lung	Bone marrow	11	2	1
Lung	Bone marrow	11	4	3
Lung	Bone marrow	11	2	2
Lung	Bone marrow	11	1	2
Lung	Bone marrow	11	3	3
Lung	Bone marrow	11	2	4
Lung	Bone marrow	11	4	0
Lung	Bone marrow	11	3	1
Lung	Bone marrow	11	2	1
Lung	Bone marrow	11	1	3
Lung	Bone marrow	11	2	2
Lung	Bone marrow	11	4	1
Lung	Bone marrow	11	5	3
Lung	Bone marrow	11	2	2
Lung	Bone marrow	11	2	2
Lung	Bone marrow	11	2	2
Lung	Bone marrow	11	3	2
Lung	Bone marrow	11	3	1
Lung	Bone marrow	11	2	4
Lung	Bone marrow	11	2	2
Lung	Bone marrow	11	2	2
Lung	Bone marrow	11	4	3
Lung	Bone marrow	11	2	2
Lung	Bone marrow	11	2	2
Lung	Bone marrow	11	5	2
Lung	Bone marrow	11	2	3
Lung	Bone marrow	11	2	1
Lung	Bone marrow	11	4	1
Lung	Bone marrow	11	4	1
Lung	Bone marrow	11	4	0
Lung	Bone marrow	11	1	0
Lung	Bone marrow	11	2	3
Lung	Bone marrow	11	2	1
Lung	Bone marrow	11	3	1
Lung	Bone marrow	11	3	1
Lung	Bone marrow	11	4	0
Lung	Bone marrow	11	1	1
Lung	Bone marrow	11	3	5
Lung	Bone marrow	11	3	1
Lung	Bone marrow	11	2	0
Lung	Bone marrow	11	1	1
Lung	Bone marrow	11	3	1
Lung	Bone marrow	11	3	2
Lung	Bone marrow	11	3	2
Lung	Bone marrow	11	1	1
Lung	Bone marrow	11	4	2
Lung	Bone marrow	11	4	3
Lung	Bone marrow	11	5	5
Lung	Bone marrow	11	4	2
Lung	Bone marrow	11	3	1
Lung	Bone marrow	11	6	2
Lung	Bone marrow	11	1	0
Lung	Bone marrow	11	3	3
Lung	Bone marrow	11	2	1
Lung	Bone marrow	11	4	1
Lung	Bone marrow	11	2	0
Lung	Bone marrow	11	2	0
Lung	Bone marrow	11	0	1
Lung	Bone marrow	11	3	1
Lung	Bone marrow	11	4	0
Lung	Bone marrow	11	3	2
Lung	Bone marrow	11	3	1
Lung	Bone marrow	11	3	2
Lung	Bone marrow	11	2	0
Lung	Bone marrow	11	4	1
Lung	Bone marrow	11	5	3
Lung	Bone marrow	11	3	2
Lung	Bone marrow	11	2	1
Lung	Bone marrow	11	5	6
Lung	Bone marrow	11	1	0
Lung	Bone marrow	11	6	3
Lung	Bone marrow	11	3	1
Lung	Bone marrow	11	6	2
Lung	Bone marrow	11	4	3
Lung	Bone marrow	11	6	1
Lung	Bone marrow	11	4	2
Lung	Bone marrow	11	2	1
Lung	Bone marrow	11	1	1
Lung	Bone marrow	11	5	2
Lung	Bone marrow	11	3	0
Lung	Bone marrow	11	5	3
Lung	Bone marrow	11	1	1
Lung	Bone marrow	11	2	1
Lung	Bone marrow	11	3	2
Lung	Bone marrow	11	3	1
Lung	Bone marrow	11	2	1
Lung	Bone marrow	11	4	2
Lung	Bone marrow	11	5	1
Lung	Bone marrow	11	4	2
Lung	Bone marrow	11	5	4
Lung	Bone marrow	11	2	4
Lung	Bone marrow	11	4	2
Lung	Bone marrow	11	5	5
Lung	Bone marrow	11	5	2
Lung	Bone marrow	11	3	3
Lung	Bone marrow	11	4	1
Lung	Bone marrow	11	1	1
Lung	Bone marrow	11	1	1
Lung	Bone marrow	11	3	0
Lung	Bone marrow	11	4	0
Lung	Bone marrow	11	5	3
Lung	Bone marrow	11	4	0
Lung	Bone marrow	11	5	2
Lung	Bone marrow	11	3	1
Lung	Bone marrow	11	5	2
Lung	Bone marrow	11	2	3
Lung	Bone marrow	11	5	3
Lung	Bone marrow	11	3	0
Lung	Bone marrow	11	2	2
Lung	Bone marrow	11	3	1
Lung	Bone marrow	11	5	2
Lung	Bone marrow	11	3	0
Lung	Bone marrow	11	5	2
Lung	Bone marrow	11	4	2
Lung	Bone marrow	11	2	1
Lung	Bone marrow	11	3	0
Lung	Bone marrow	11	6	1
Lung	Bone marrow	11	4	2
Lung	Bone marrow	11	5	1
Lung	Bone marrow	11	4	1
Lung	Bone marrow	11	2	1
Lung	Bone marrow	11	3	3
Lung	Bone marrow	11	4	1
Lung	Bone marrow	11	1	1
Lung	Bone marrow	11	3	2
Lung	Bone marrow	11	4	1
Lung	Bone marrow	11	3	0
Lung	Bone marrow	11	6	2
Lung	Bone marrow	11	1	2
Lung	Bone marrow	11	2	3
Lung	Bone marrow	11	4	2
Lung	Bone marrow	11	5	2
Lung	Bone marrow	11	6	2
Lung	Bone marrow	11	5	3
Lung	Bone marrow	11	3	3
Lung	Bone marrow	11	1	4
Lung	Bone marrow	11	6	1
Lung	Bone marrow	11	2	0
Lung	Bone marrow	11	3	3
Lung	Bone marrow	11	3	5
Lung	Bone marrow	11	1	2
Lung	Bone marrow	11	4	1
Lung	Bone marrow	11	4	2
Lung	Bone marrow	11	4	1
Lung	Bone marrow	11	3	1
Lung	Bone marrow	11	3	0
Lung	Bone marrow	11	4	5
Lung	Bone marrow	11	2	5
Lung	Bone marrow	11	3	0
Lung	Bone marrow	11	2	2
Lung	Bone marrow	11	3	4
Lung	Bone marrow	11	2	1
Lung	Bone marrow	11	4	1
Lung	Bone marrow	11	2	2
Lung	Bone marrow	11	4	1
Lung	Bone marrow	11	4	5
Lung	Bone marrow	11	4	1
Lung	Bone marrow	11	4	3
Lung	Bone marrow	11	6	2
Lung	Bone marrow	11	1	3
Lung	Bone marrow	11	5	3
Lung	Bone marrow	11	5	1
Lung	Bone marrow	11	2	1
Lung	Bone marrow	11	2	1
Lung	Bone marrow	11	4	1
Lung	Bone marrow	11	1	2
Lung	Bone marrow	11	4	2
Lung	Bone marrow	11	2	3
Lung	Bone marrow	11	4	1
Lung	Bone marrow	11	2	1
Lung	Bone marrow	11	1	2
Lung	Bone marrow	11	3	1
Lung	Bone marrow	11	3	1
Lung	Bone marrow	11	3	1
Lung	Bone marrow	11	1	1
Lung	Bone marrow	11	4	2
Lung	Bone marrow	11	5	2
Lung	Bone marrow	11	3	2
Lung	Bone marrow	11	2	5
Lung	Bone marrow	11	6	3
Lung	Bone marrow	11	3	3
Lung	Bone marrow	11	4	4
Lung	Bone marrow	11	3	1
Lung	Bone marrow	11	2	1
Lung	Bone marrow	11	1	5
Lung	Bone marrow	11	4	1
Lung	Bone marrow	11	5	1
Lung	Bone marrow	11	4	3
Lung	Bone marrow	11	2	1
Lung	Bone marrow	11	0	2
Lung	Bone marrow	11	2	2
Lung	Bone marrow	11	4	1
Lung	Bone marrow	11	2	2
Lung	Bone marrow	11	2	2
Lung	Bone marrow	11	3	0
Lung	Bone marrow	11	3	1
Lung	Bone marrow	11	2	2
Lung	Bone marrow	11	4	1
Lung	Bone marrow	11	4	3
Lung	Bone marrow	11	3	2
Lung	Bone marrow	11	2	4
Lung	Bone marrow	11	4	1
Lung	Bone marrow	11	3	3
Lung	Bone marrow	11	4	2
Lung	Bone marrow	11	4	3
Lung	Bone marrow	11	1	0
Lung	Bone marrow	11	1	3
Lung	Bone marrow	11	3	1
Lung	Bone marrow	11	8	1
Lung	Bone marrow	11	3	2
Lung	Bone marrow	11	1	3
Lung	Bone marrow	11	2	1
Lung	Bone marrow	11	3	3
Lung	Bone marrow	11	3	0
Lung	Bone marrow	11	2	1
Lung	Bone marrow	11	2	2
Lung	Bone marrow	11	1	0
Lung	Bone marrow	11	1	3
Lung	Bone marrow	11	5	4
Lung	Bone marrow	11	7	2
Lung	Bone marrow	11	2	2
Lung	Bone marrow	11	3	2
Lung	Bone marrow	11	5	2
Lung	Bone marrow	11	5	2
Lung	Bone marrow	11	0	1
Lung	Bone marrow	11	4	2
Lung	Bone marrow	11	4	1
Lung	Bone marrow	11	4	2
Lung	Bone marrow	11	3	0
Lung	Bone marrow	11	2	2
Lung	Bone marrow	11	1	3
Lung	Bone marrow	11	4	3
Lung	Bone marrow	11	4	2
Lung	Bone marrow	11	4	5
Lung	Bone marrow	11	4	3
Lung	Bone marrow	11	2	1
Lung	Bone marrow	11	5	2
Lung	Bone marrow	11	1	2
Lung	Bone marrow	11	2	1
Lung	Bone marrow	11	3	2
Lung	Bone marrow	11	1	4
Lung	Bone marrow	11	4	0
Lung	Bone marrow	11	3	3
Lung	Bone marrow	11	3	1
Lung	Bone marrow	11	4	1
Lung	Bone marrow	11	3	3
Lung	Bone marrow	11	3	0
Lung	Bone marrow	11	1	1
Lung	Bone marrow	11	3	2
Lung	Bone marrow	11	2	3
Lung	Bone marrow	11	2	3
Lung	Bone marrow	11	5	3
Lung	Bone marrow	11	4	2
Lung	Bone marrow	11	2	2
Lung	Bone marrow	11	2	0
Lung	Bone marrow	11	2	3
Lung	Bone marrow	11	3	2
Lung	Bone marrow	11	2	1
Lung	Bone marrow	11	3	0
Lung	Bone marrow	11	6	2
Lung	Bone marrow	11	2	3
Lung	Bone marrow	11	3	1
Lung	Bone marrow	11	4	1
Lung	Bone marrow	11	2	1
Lung	Bone marrow	11	1	0
Lung	Bone marrow	11	1	1
Lung	Bone marrow	11	2	0
Lung	Bone marrow	11	5	0
Lung	Bone marrow	11	3	3
Lung	Bone marrow	11	3	3
Lung	Bone marrow	11	4	2
Lung	Bone marrow	11	4	3
Lung	Bone marrow	11	1	0
Lung	Bone marrow	11	4	1
Lung	Bone marrow	11	3	2
Lung	Bone marrow	11	3	0
Lung	Bone marrow	11	5	0
Lung	Bone marrow	11	5	2
Lung	Bone marrow	11	3	1
Lung	Bone marrow	11	4	2
Lung	Bone marrow	11	5	4
Lung	Bone marrow	11	3	1
Lung	Bone marrow	11	4	2
Lung	Bone marrow	11	1	2
Lung	Bone marrow	11	3	4
Lung	Bone marrow	11	2	2
Lung	Bone marrow	11	6	1
Lung	Bone marrow	11	4	4
Lung	Bone marrow	11	1	3
Lung	Bone marrow	11	4	1
Lung	Bone marrow	11	5	1
Lung	Bone marrow	11	6	2
Lung	Bone marrow	11	4	2
Lung	Bone marrow	11	7	4
Lung	Bone marrow	11	5	3
Lung	Bone marrow	11	2	2
Lung	Bone marrow	11	3	0
Lung	Bone marrow	11	3	1
Lung	Bone marrow	11	2	2
Lung	Bone marrow	11	2	1
Lung	Bone marrow	11	2	2
Lung	Bone marrow	11	1	1
Lung	Bone marrow	11	3	1
Lung	Bone marrow	11	3	3
Lung	Bone marrow	11	1	1
Lung	Bone marrow	11	4	2
Lung	Bone marrow	11	3	2
Lung	Bone marrow	11	3	2
Lung	Bone marrow	11	4	3
Lung	Bone marrow	11	2	2
Lung	Bone marrow	11	1	1
Lung	Bone marrow	11	2	4
Lung	Bone marrow	11	3	2
Lung	Bone marrow	11	5	2
Lung	Bone marrow	11	2	1
Lung	Bone marrow	11	2	0
Lung	Bone marrow	11	4	4
Lung	Bone marrow	11	4	2
Lung	Bone marrow	11	3	5
Lung	Bone marrow	11	7	2
Lung	Bone marrow	11	3	1
Lung	Bone marrow	11	6	5
Lung	Bone marrow	11	3	2
Lung	Bone marrow	11	4	2
Lung	Bone marrow	11	6	4
Lung	Bone marrow	11	4	3
Lung	Bone marrow	11	1	2
Lung	Bone marrow	11	2	4
Lung	Bone marrow	11	3	1
Lung	Bone marrow	11	2	3
Lung	Bone marrow	11	3	3
Lung	Bone marrow	11	2	2
Lung	Bone marrow	11	2	3
Lung	Bone marrow	11	1	1
Lung	Bone marrow	11	4	1
Lung	Bone marrow	11	3	0
Lung	Bone marrow	11	3	1
Lung	Bone marrow	11	4	1
Lung	Bone marrow	11	5	1
Lung	Bone marrow	11	4	2
Lung	Bone marrow	11	4	1
Lung	Bone marrow	11	5	2
Lung	Bone marrow	11	1	2
Lung	Bone marrow	11	3	2
Lung	Bone marrow	11	3	4
Lung	Bone marrow	11	4	1
Lung	Bone marrow	11	2	1
Lung	Bone marrow	11	3	1
Lung	Bone marrow	11	1	0
Lung	Bone marrow	11	4	1
Lung	Bone marrow	11	3	3
Lung	Bone marrow	11	2	1
Lung	Bone marrow	11	2	1
Lung	Bone marrow	11	5	6
Lung	Bone marrow	11	6	4
Lung	Bone marrow	11	2	1
Lung	Bone marrow	11	6	4
Lung	Bone marrow	11	5	1
Lung	Bone marrow	11	0	2
Lung	Bone marrow	11	5	3
Lung	Bone marrow	11	4	2
Lung	Bone marrow	11	4	0
Lung	Bone marrow	11	4	1
Lung	Bone marrow	11	7	2
Lung	Bone marrow	11	4	2
Lung	Bone marrow	11	6	4
Lung	Bone marrow	11	3	1
Lung	Bone marrow	11	6	1
Lung	Bone marrow	11	3	3
Lung	Bone marrow	11	2	1
Lung	Bone marrow	11	3	0
Lung	Bone marrow	11	2	0
Lung	Bone marrow	11	3	2
Lung	Bone marrow	11	1	2
Lung	Bone marrow	11	4	3
Lung	Bone marrow	11	1	1
Lung	Bone marrow	11	1	1
Lung	Bone marrow	11	7	3
Lung	Bone marrow	11	3	2
Lung	Bone marrow	11	4	1
Lung	Bone marrow	11	3	0
Lung	Bone marrow	11	3	3
Lung	Bone marrow	11	0	1
Lung	Bone marrow	11	3	2
Lung	Bone marrow	11	4	3
Lung	Bone marrow	11	1	2
Lung	Bone marrow	11	4	0
Lung	Bone marrow	11	3	3
Lung	Bone marrow	11	5	1
Lung	Bone marrow	11	1	2
Lung	Bone marrow	11	4	1
Lung	Bone marrow	11	4	1
Lung	Bone marrow	11	2	1
Lung	Bone marrow	11	4	0
Lung	Bone marrow	11	3	0
Lung	Bone marrow	11	5	3
Lung	Bone marrow	11	3	3
Lung	Bone marrow	11	3	0
Lung	Bone marrow	11	3	1
Lung	Bone marrow	11	5	1
Lung	Bone marrow	11	2	1
Lung	Bone marrow	11	4	0
Lung	Bone marrow	11	1	1
Lung	Bone marrow	11	1	3
Lung	Bone marrow	11	4	0
Lung	Bone marrow	11	5	1
Lung	Bone marrow	11	2	1
Lung	Bone marrow	11	1	2
Lung	Bone marrow	11	3	2
Lung	Bone marrow	11	3	0
Lung	Bone marrow	11	3	1
Lung	Bone marrow	11	2	3
Lung	Bone marrow	11	5	1
Lung	Bone marrow	11	5	1
Lung	Bone marrow	11	1	3
Lung	Bone marrow	11	2	3
Lung	Bone marrow	11	3	2
Lung	Bone marrow	11	5	2
Lung	Bone marrow	11	4	2
Lung	Bone marrow	11	3	2
Lung	Bone marrow	11	2	2
Lung	Bone marrow	11	6	1
Lung	Bone marrow	11	6	6
Lung	Bone marrow	11	4	3
Lung	Bone marrow	11	3	1
Lung	Bone marrow	11	2	1
Lung	Bone marrow	11	3	2
Lung	Bone marrow	11	3	2
Lung	Bone marrow	11	5	0
Lung	Bone marrow	11	3	2
Lung	Bone marrow	11	4	2
Lung	Bone marrow	11	1	4
Lung	Bone marrow	11	3	0
Lung	Bone marrow	11	2	5
Lung	Bone marrow	11	6	3
Lung	Bone marrow	11	2	3
Lung	Bone marrow	11	3	0
Lung	Bone marrow	11	3	0
Lung	Bone marrow	11	4	2
Lung	Bone marrow	11	3	4
Lung	Bone marrow	11	2	0
Lung	Bone marrow	11	7	1
Lung	Bone marrow	11	5	1
Lung	Bone marrow	11	5	0
Lung	Bone marrow	11	4	4
Lung	Bone marrow	11	2	2
Lung	Bone marrow	11	2	2
Lung	Bone marrow	11	4	1
Lung	Bone marrow	11	4	3
Lung	Bone marrow	11	7	0
Lung	Bone marrow	11	1	2
Lung	Bone marrow	11	2	2
Lung	Bone marrow	11	3	0
Lung	Bone marrow	11	1	2
Lung	Bone marrow	11	6	2
Lung	Bone marrow	11	3	2
Lung	Bone marrow	11	2	2
Lung	Bone marrow	11	5	3
Lung	Bone marrow	11	2	1
Lung	Bone marrow	11	3	2
Lung	Bone marrow	11	4	1
Lung	Bone marrow	11	2	2
Lung	Bone marrow	11	3	1
Lung	Bone marrow	11	0	3
Lung	Bone marrow	11	3	0
Lung	Bone marrow	11	1	3
Lung	Bone marrow	11	4	4
Lung	Bone marrow	11	4	2
Lung	Bone marrow	11	3	3
Lung	Bone marrow	11	4	1
Lung	Bone marrow	11	4	0
Lung	Bone marrow	11	2	3
Lung	Bone marrow	11	1	2
Lung	Bone marrow	11	2	0
Lung	Bone marrow	11	5	2
Lung	Bone marrow	11	1	3
Lung	Bone marrow	11	3	1
Lung	Bone marrow	11	3	3
Lung	Bone marrow	11	3	1
Lung	Bone marrow	11	1	1
Lung	Bone marrow	11	3	0
Lung	Bone marrow	11	4	1
Lung	Bone marrow	11	4	0
Lung	Bone marrow	11	2	2
Lung	Bone marrow	11	2	2
Lung	Bone marrow	11	6	3
Lung	Bone marrow	11	4	1
Lung	Bone marrow	11	2	1
Lung	Bone marrow	11	3	1
Lung	Bone marrow	11	2	1
Lung	Bone marrow	11	2	0
Lung	Bone marrow	11	4	0
Lung	Bone marrow	11	1	3
Lung	Bone marrow	11	2	2
Lung	Bone marrow	11	4	2
Lung	Bone marrow	11	2	1
Lung	Bone marrow	11	4	2
Lung	Bone marrow	11	5	1
Lung	Bone marrow	11	5	2
Lung	Bone marrow	11	4	1
Lung	Bone marrow	11	6	2
Lung	Bone marrow	11	4	0
Lung	Bone marrow	11	3	2
Lung	Bone marrow	11	3	3
Lung	Bone marrow	11	3	1
Lung	Bone marrow	11	3	5
Lung	Bone marrow	11	1	1
Lung	Bone marrow	11	5	4
Lung	Bone marrow	11	2	1
Lung	Bone marrow	11	3	2
Lung	Bone marrow	11	1	1
Lung	Bone marrow	11	2	1
Lung	Bone marrow	11	4	4
Lung	Bone marrow	11	3	2
Lung	Bone marrow	11	3	4
Lung	Bone marrow	11	3	3
Lung	Bone marrow	11	2	0
Lung	Bone marrow	11	2	1
Lung	Bone marrow	11	2	4
Lung	Bone marrow	11	4	4
Lung	Bone marrow	11	3	6
Lung	Bone marrow	11	4	0
Lung	Bone marrow	11	0	2
Lung	Bone marrow	11	6	1
Lung	Bone marrow	11	4	1
Lung	Bone marrow	11	2	1
Lung	Bone marrow	11	5	3
Lung	Bone marrow	11	3	2
Lung	Bone marrow	11	4	1
Lung	Bone marrow	11	4	0
Lung	Bone marrow	11	4	3
Lung	Bone marrow	11	5	3
Lung	Bone marrow	11	5	2
Lung	Bone marrow	11	4	0
Lung	Bone marrow	11	1	5
Lung	Bone marrow	11	5	0
Lung	Bone marrow	11	6	1
Lung	Bone marrow	11	4	1
Lung	Bone marrow	11	2	1
Lung	Bone marrow	11	3	1
Lung	Bone marrow	11	3	1
Lung	Bone marrow	11	5	1
Lung	Bone marrow	11	3	1
Lung	Bone marrow	11	3	3
Lung	Bone marrow	11	4	1
Lung	Bone marrow	11	2	3
Lung	Bone marrow	11	4	0
Lung	Bone marrow	11	3	1
Lung	Bone marrow	11	1	0
Lung	Bone marrow	11	4	2
Lung	Bone marrow	11	4	4
Lung	Bone marrow	11	2	1
Lung	Bone marrow	11	4	6
Lung	Bone marrow	11	3	4
Lung	Bone marrow	11	4	3
Lung	Bone marrow	11	2	0
Lung	Bone marrow	11	3	1
Lung	Bone marrow	11	2	1
Lung	Bone marrow	11	1	3
Lung	Bone marrow	11	3	0
Lung	Bone marrow	11	1	2
Lung	Bone marrow	11	4	2
Lung	Bone marrow	11	5	3
Lung	Bone marrow	11	3	0
Lung	Bone marrow	11	4	2
Lung	Bone marrow	11	4	2
Lung	Bone marrow	11	0	0
Lung	Bone marrow	11	3	1
Lung	Bone marrow	11	3	1
Lung	Bone marrow	11	4	2
Lung	Bone marrow	11	2	0
Lung	Bone marrow	11	3	4
Lung	Bone marrow	11	3	2
Lung	Bone marrow	11	2	3
Lung	Bone marrow	11	6	1
Lung	Bone marrow	11	3	1
Lung	Bone marrow	11	2	4
Lung	Bone marrow	11	5	2
Lung	Bone marrow	11	5	2
Lung	Bone marrow	11	3	2
Lung	Bone marrow	11	2	2
Lung	Bone marrow	11	4	0
Lung	Bone marrow	11	7	2
Lung	Bone marrow	11	2	1
Lung	Bone marrow	11	5	1
Lung	Bone marrow	11	3	0
Lung	Bone marrow	11	3	2
Lung	Bone marrow	11	2	1
Lung	Bone marrow	11	2	2
Lung	Bone marrow	11	3	1
Lung	Bone marrow	11	2	3
Lung	Bone marrow	11	5	3
Lung	Bone marrow	11	2	0
Lung	Bone marrow	11	5	6
Lung	Bone marrow	11	6	1
Lung	Bone marrow	11	3	1
Lung	Bone marrow	11	3	1
Lung	Bone marrow	11	3	1
Lung	Bone marrow	11	4	1
Lung	Bone marrow	11	3	0
Lung	Bone marrow	11	4	1
Lung	Bone marrow	11	3	4
Lung	Bone marrow	11	4	0
Lung	Bone marrow	11	3	3
Lung	Bone marrow	11	5	2
Lung	Bone marrow	11	3	2
Lung	Bone marrow	11	3	1
Lung	Bone marrow	11	3	3
Lung	Bone marrow	11	4	2
Lung	Bone marrow	11	4	1
Lung	Bone marrow	11	1	4
Lung	Bone marrow	11	3	4
Lung	Bone marrow	11	5	1
Lung	Bone marrow	11	3	1
Lung	Bone marrow	11	2	3
Lung	Bone marrow	11	3	2
Lung	Bone marrow	11	5	3
Lung	Bone marrow	11	4	4
Lung	Bone marrow	11	2	4
Lung	Bone marrow	11	1	2
Lung	Bone marrow	11	3	3
Lung	Bone marrow	11	5	1
Lung	Bone marrow	11	3	3
Lung	Bone marrow	11	4	4
Lung	Bone marrow	11	5	0
Lung	Bone marrow	11	5	2
Lung	Bone marrow	11	3	1
Lung	Bone marrow	11	2	3
Lung	Bone marrow	11	5	0
Lung	Bone marrow	11	1	4
Lung	Bone marrow	11	1	1
Lung	Bone marrow	11	2	1
Lung	Bone marrow	11	3	2
Lung	Bone marrow	11	2	3
Lung	Bone marrow	11	1	0
Lung	Bone marrow	11	3	0
Lung	Bone marrow	11	4	2
Lung	Bone marrow	11	4	1
Lung	Bone marrow	11	2	8
Lung	Bone marrow	11	4	4
Lung	Bone marrow	11	2	0
Lung	Bone marrow	11	6	1
Lung	Bone marrow	11	3	0
Lung	Bone marrow	11	1	2
Lung	Bone marrow	11	5	3
Lung	Bone marrow	11	6	1
Lung	Bone marrow	11	2	1
Lung	Bone marrow	11	2	3
Lung	Bone marrow	11	3	1
Lung	Bone marrow	11	2	0
Lung	Bone marrow	11	2	1
Lung	Bone marrow	11	3	4
Lung	Bone marrow	11	2	2
Lung	Bone marrow	11	5	2
Lung	Bone marrow	11	3	0
Lung	Bone marrow	11	4	2
Lung	Bone marrow	11	6	1
Lung	Bone marrow	11	6	1
Lung	Bone marrow	11	3	1
Lung	Bone marrow	11	2	1
Lung	Bone marrow	11	0	1
Lung	Bone marrow	11	5	3
Lung	Bone marrow	11	4	4
Lung	Bone marrow	11	3	1
Lung	Bone marrow	11	3	0
Lung	Bone marrow	11	3	0
Lung	Bone marrow	11	3	1
Lung	Bone marrow	11	2	2
Lung	Bone marrow	11	3	1
Lung	Bone marrow	11	1	1
Lung	Bone marrow	11	4	2
Lung	Bone marrow	11	3	1
Lung	Bone marrow	11	1	2
Lung	Bone marrow	11	2	3
Lung	Bone marrow	11	2	5
Lung	Bone marrow	11	6	0
Lung	Bone marrow	11	3	2
Lung	Bone marrow	11	1	3
Lung	Bone marrow	11	0	2
Lung	Bone marrow	11	3	2
Lung	Bone marrow	11	2	1
Lung	Bone marrow	11	5	3
Lung	Bone marrow	11	3	0
Lung	Bone marrow	11	3	3
Lung	Bone marrow	11	2	2
Lung	Bone marrow	11	4	1
Lung	Bone marrow	11	3	2
Lung	Bone marrow	11	5	3
Lung	Bone marrow	11	4	4
Lung	Bone marrow	11	3	0
Lung	Bone marrow	11	2	0
Lung	Bone marrow	11	3	0
Lung	Bone marrow	11	2	4
Lung	Bone marrow	11	5	1
Lung	Bone marrow	11	4	1
Lung	Bone marrow	11	4	2
Lung	Bone marrow	11	3	1
Lung	Bone marrow	11	3	2
Lung	Bone marrow	11	3	0
Lung	Bone marrow	11	4	1
Lung	Bone marrow	11	4	1
Lung	Bone marrow	11	5	1
Lung	Bone marrow	11	4	2
Lung	Bone marrow	11	3	1
Lung	Bone marrow	11	1	1
Lung	Bone marrow	11	2	1
Lung	Bone marrow	11	2	2
Lung	Bone marrow	11	2	1
Lung	Bone marrow	11	3	1
Lung	Bone marrow	11	7	3
Lung	Bone marrow	11	4	1
Lung	Bone marrow	11	3	1
Lung	Bone marrow	11	4	2
Lung	Bone marrow	11	1	1
Lung	Bone marrow	11	5	1
Lung	Bone marrow	11	6	0
Lung	Bone marrow	11	3	3
Lung	Bone marrow	11	2	0
Lung	Bone marrow	11	2	3
[truncated: 5,001 more rows]

## Sheet: Figure 3C
Tissue	Disease\Phenotypic series accession (OMIM)	Disease name (OMIM)	Cell type name	PrEDiCT score	Cell type likely affected by disease (1=Yes, 0=No)
Spleen	PS306400	Granulomatous disease, chronic	cd1c-positive myeloid dendritic cell	0.192656	0
Spleen	PS306400	Granulomatous disease, chronic	cd4-positive, alpha-beta memory t cell	-0.436035	0
Spleen	PS306400	Granulomatous disease, chronic	cd8-positive, alpha-beta memory t cell	-0.403838	0
Spleen	PS306400	Granulomatous disease, chronic	cd8-positive, alpha-beta t cell	-0.413147	0
Spleen	PS306400	Granulomatous disease, chronic	cd141-positive myeloid dendritic cell	-0.213975	0
Spleen	PS306400	Granulomatous disease, chronic	classical monocyte	1.07287	1
Spleen	PS306400	Granulomatous disease, chronic	endothelial cell	-0.425172	0
Spleen	PS306400	Granulomatous disease, chronic	erythrocyte	-0.528858	0
Spleen	PS306400	Granulomatous disease, chronic	hematopoietic stem cell	-0.472691	0
Spleen	PS306400	Granulomatous disease, chronic	innate lymphoid cell	-0.44033	0
Spleen	PS306400	Granulomatous disease, chronic	intermediate monocyte	1.09314	1
Spleen	PS306400	Granulomatous disease, chronic	macrophage	0.421249	0
Spleen	PS306400	Granulomatous disease, chronic	mature nk t cell	-0.39092	0
Spleen	PS306400	Granulomatous disease, chronic	memory b cell	0.117619	0
Spleen	PS306400	Granulomatous disease, chronic	naive b cell	-0.0621576	0
Spleen	PS306400	Granulomatous disease, chronic	naive thymus-derived cd4-positive, alpha-beta t cell	-0.463597	0
Spleen	PS306400	Granulomatous disease, chronic	naive thymus-derived cd8-positive, alpha-beta t cell	-0.420619	0
Spleen	PS306400	Granulomatous disease, chronic	neutrophil	2.51206	1
Spleen	PS306400	Granulomatous disease, chronic	nk cell	-0.416911	0
Spleen	PS306400	Granulomatous disease, chronic	plasma cell	-0.0633022	0
Spleen	PS306400	Granulomatous disease, chronic	plasmacytoid dendritic cell	0.496598	0
Spleen	PS306400	Granulomatous disease, chronic	platelet	-0.352625	0
Spleen	PS306400	Granulomatous disease, chronic	regulatory t cell	-0.417133	0
Spleen	PS306400	Granulomatous disease, chronic	type i nk t cell	-0.395105	0
Lung	PS306400	Granulomatous disease, chronic	cd8-positive, alpha-beta t cell	-0.112162	0
Lung	PS306400	Granulomatous disease, chronic	cd4-positive, alpha-beta t cell	-0.0143607	0
Lung	PS306400	Granulomatous disease, chronic	adventitial cell	-0.41237	0
Lung	PS306400	Granulomatous disease, chronic	alveolar fibroblast	-0.391238	0
Lung	PS306400	Granulomatous disease, chronic	b cell	0.245095	0
Lung	PS306400	Granulomatous disease, chronic	basal cell	-0.414391	0
Lung	PS306400	Granulomatous disease, chronic	basophil	-0.0680131	0
Lung	PS306400	Granulomatous disease, chronic	bronchial smooth muscle cell	-0.476902	0
Lung	PS306400	Granulomatous disease, chronic	bronchial vessel endothelial cell	-0.444096	0
Lung	PS306400	Granulomatous disease, chronic	capillary aerocyte	-0.437736	0
Lung	PS306400	Granulomatous disease, chronic	capillary endothelial cell	-0.409252	0
Lung	PS306400	Granulomatous disease, chronic	classical monocyte	1.07449	1
Lung	PS306400	Granulomatous disease, chronic	club cell	-0.440017	0
Lung	PS306400	Granulomatous disease, chronic	dendritic cell	0.684666	0
Lung	PS306400	Granulomatous disease, chronic	endothelial cell of artery	-0.363407	0
Lung	PS306400	Granulomatous disease, chronic	endothelial cell of lymphatic vessel	-0.455634	0
Lung	PS306400	Granulomatous disease, chronic	fibroblast	-0.447402	0
Lung	PS306400	Granulomatous disease, chronic	intermediate monocyte	1.16302	1
Lung	PS306400	Granulomatous disease, chronic	lung ciliated cell	-0.408951	0
Lung	PS306400	Granulomatous disease, chronic	lung microvascular endothelial cell	-0.444677	0
Lung	PS306400	Granulomatous disease, chronic	macrophage	1.30768	1
Lung	PS306400	Granulomatous disease, chronic	mesothelial cell	-0.219192	0
Lung	PS306400	Granulomatous disease, chronic	myofibroblast cell	-0.428744	0
Lung	PS306400	Granulomatous disease, chronic	neutrophil	2.74654	1
Lung	PS306400	Granulomatous disease, chronic	nk cell	-0.196692	0
Lung	PS306400	Granulomatous disease, chronic	non-classical monocyte	0.941685	0
Lung	PS306400	Granulomatous disease, chronic	pericyte cell	-0.400887	0
Lung	PS306400	Granulomatous disease, chronic	plasma cell	-0.165645	0
Lung	PS306400	Granulomatous disease, chronic	plasmacytoid dendritic cell	1.17841	1
Lung	PS306400	Granulomatous disease, chronic	pulmonary ionocyte	-0.438008	0
Lung	PS306400	Granulomatous disease, chronic	respiratory goblet cell	-0.372546	0
Lung	PS306400	Granulomatous disease, chronic	respiratory mucous cell	-0.500433	0
Lung	PS306400	Granulomatous disease, chronic	serous cell of epithelium of bronchus	-0.393088	0
Lung	PS306400	Granulomatous disease, chronic	smooth muscle cell	-0.500433	0
Lung	PS306400	Granulomatous disease, chronic	type i pneumocyte	-0.411593	0
Lung	PS306400	Granulomatous disease, chronic	type ii pneumocyte	-0.443032	0
Lung	PS306400	Granulomatous disease, chronic	vascular associated smooth muscle cell	-0.334474	0
Lung	PS306400	Granulomatous disease, chronic	vein endothelial cell	-0.409719	0
Bone marrow	PS306400	Granulomatous disease, chronic	cd4-positive, alpha-beta t cell	-0.53202	0
Bone marrow	PS306400	Granulomatous disease, chronic	cd8-positive, alpha-beta t cell	-0.534922	0
Bone marrow	PS306400	Granulomatous disease, chronic	cd24 neutrophil	0.65958	0
Bone marrow	PS306400	Granulomatous disease, chronic	erythrocyte	-0.765771	0
Bone marrow	PS306400	Granulomatous disease, chronic	erythroid progenitor	-0.75992	0
Bone marrow	PS306400	Granulomatous disease, chronic	granulocyte	-0.165929	0
Bone marrow	PS306400	Granulomatous disease, chronic	hematopoietic stem cell	-0.61485	0
Bone marrow	PS306400	Granulomatous disease, chronic	macrophage	0.348262	0
Bone marrow	PS306400	Granulomatous disease, chronic	memory b cell	0.261393	0
Bone marrow	PS306400	Granulomatous disease, chronic	monocyte	0.438149	0
Bone marrow	PS306400	Granulomatous disease, chronic	myeloid progenitor	-0.753698	0
Bone marrow	PS306400	Granulomatous disease, chronic	naive b cell	0.24223	0
Bone marrow	PS306400	Granulomatous disease, chronic	nampt neutrophil	1.43344	1
Bone marrow	PS306400	Granulomatous disease, chronic	neutrophil	1.03692	1
Bone marrow	PS306400	Granulomatous disease, chronic	nk cell	-0.532337	0
Bone marrow	PS306400	Granulomatous disease, chronic	plasma cell	-0.52201	0
