# Supplementary material for: Affected cell types for hundreds of Mendelian diseases revealed by analysis of human and mouse single-cell data
Source: eLife. 2024 Jan 10;13:e84613. doi: 10.7554/eLife.84613 (PMC10830129; doi:10.7554/eLife.84613)
Supplement: Figure 4—source data 1. [file elife-84613-fig4-data1.xlsx]

## Sheet: Figure 4A
Tissue	Disease\Phenotypic series accession (OMIM)	Disease name (OMIM)	Cell type name	Gene function	PrEDiCT score	Cell type likely affected by disease (1=Yes, 0=No)
Bone marrow	PS308230	Immunodeficiency with hyper-IgM	cd4-positive, alpha-beta t cell	Ligands	3.65586	1
Bone marrow	PS308230	Immunodeficiency with hyper-IgM	cd4-positive, alpha-beta t cell	Receptors	-0.406243	0
Bone marrow	PS308230	Immunodeficiency with hyper-IgM	naive b cell	Ligands	-0.343208	0
Bone marrow	PS308230	Immunodeficiency with hyper-IgM	naive b cell	Receptors	2.84116	1

## Sheet: Figure 4B
Tissue	Disease\Phenotypic series accession (OMIM)	Disease name (OMIM)	Cell type name	Gene function	PrEDiCT score	Cell type likely affected by disease (1=Yes, 0=No)
Skeletal muscle	PS253600	Muscular dystrophy, limb-girdle, autosomal recessive	mesenchymal stem cell	Ligands	3.8243	1
Skeletal muscle	PS253600	Muscular dystrophy, limb-girdle, autosomal recessive	mesenchymal stem cell	Receptors	-0.0768004	0
Skeletal muscle	PS253600	Muscular dystrophy, limb-girdle, autosomal recessive	skeletal muscle satellite stem cell	Ligands	0.76685	0
Skeletal muscle	PS253600	Muscular dystrophy, limb-girdle, autosomal recessive	skeletal muscle satellite stem cell	Receptors	3.66772	1

## Sheet: Figure 4C
Tissue	Cell type name	Gene function	PrEDiCT score	Cell type likely affected by disease (1=Yes, 0=No)
Lung	basal cell	TSG	-0.170896	0
Lung	intermediate monocyte	TSG	2.2811	1
Lung	non-classical monocyte	TSG	1.85001	1
Lung	basal cell	Oncogene	4.80591	1
Lung	intermediate monocyte	Oncogene	-0.442165	0
Lung	non-classical monocyte	Oncogene	-0.476657	0
Trachea	basal cell	Oncogene	3.57675	1
Trachea	basal cell	TSG	1.93175	0
