# Supplementary material for: Affected cell types for hundreds of Mendelian diseases revealed by analysis of human and mouse single-cell data
Source: eLife. 2024 Jan 10;13:e84613. doi: 10.7554/eLife.84613 (PMC10830129; doi:10.7554/eLife.84613)
Supplement: Figure 5—source data 1. [file elife-84613-fig5-data1.xlsx]

## Sheet: Figure 5A
Cell type name	Tissue	Cell type prevalence	Cell-type susceptibility
cd8.positive..alpha.beta.t.cell	Lung	0.0176874	0.0574713
cd4.positive..alpha.beta.t.cell	Lung	0.0192421	0.0344828
adventitial.cell	Lung	0.0021706	0.0689655
alveolar.fibroblast	Lung	0.00689311	0.0804598
b.cell	Lung	0.00240526	0.0229885
basal.cell	Lung	0.0602781	0
basophil	Lung	0.019858	0.0114943
bronchial.smooth.muscle.cell	Lung	0.00196527	0.0229885
bronchial.vessel.endothelial.cell	Lung	0.00137862	0.0344828
capillary.aerocyte	Lung	0.0155755	0.0344828
capillary.endothelial.cell	Lung	0.0247272	0.0574713
classical.monocyte	Lung	0.040772	0.0344828
club.cell	Lung	0.030007	0.0229885
dendritic.cell	Lung	0.00815441	0.0229885
endothelial.cell.of.artery	Lung	0.00472252	0.0344828
endothelial.cell.of.lymphatic.vessel	Lung	0.00105597	0.0344828
fibroblast	Lung	0.000263992	0
intermediate.monocyte	Lung	0.00739176	0.045977
lung.ciliated.cell	Lung	0.0166315	0.0344828
lung.microvascular.endothelial.cell	Lung	0.0140795	0.0229885
macrophage	Lung	0.352986	0.0344828
mesothelial.cell	Lung	0.000469318	0.0114943
myofibroblast.cell	Lung	0.000293324	0
neutrophil	Lung	0.00404787	0.0344828
nk.cell	Lung	0.00369588	0.0229885
non.classical.monocyte	Lung	0.0293031	0.0229885
pericyte.cell	Lung	0.00571982	0.0229885
plasma.cell	Lung	0.00366655	0
plasmacytoid.dendritic.cell	Lung	0.000498651	0.0114943
pulmonary.ionocyte	Lung	0.000557315	0.0229885
respiratory.goblet.cell	Lung	0.0211487	0.0114943
respiratory.mucous.cell	Lung	0.000234659	0.0344828
serous.cell.of.epithelium.of.bronchus	Lung	0.000381321	0
smooth.muscle.cell	Lung	0.00073331	0
type.i.pneumocyte	Lung	0.00598381	0.0114943
type.ii.pneumocyte	Lung	0.258917	0.0229885
vascular.associated.smooth.muscle.cell	Lung	0.0020826	0.0229885
vein.endothelial.cell	Lung	0.0140209	0.0344828
cd4.positive..alpha.beta.t.cell	Bone marrow	0.168782	0.0608696
cd8.positive..alpha.beta.t.cell	Bone marrow	0.0841411	0.0521739
cd24.neutrophil	Bone marrow	0.211052	0.0347826
erythrocyte	Bone marrow	0.00859398	0.191304
erythroid.progenitor	Bone marrow	0.0669531	0.130435
granulocyte	Bone marrow	0.0780454	0.0434783
hematopoietic.stem.cell	Bone marrow	0.0434696	0.026087
macrophage	Bone marrow	0.0263815	0.0521739
memory.b.cell	Bone marrow	0.0287799	0.026087
monocyte	Bone marrow	0.107225	0.0782609
myeloid.progenitor	Bone marrow	0.0253822	0.130435
naive.b.cell	Bone marrow	0.00959328	0.0173913
nampt.neutrophil	Bone marrow	0.0387729	0.0608696
neutrophil	Bone marrow	0.00729489	0.0608696
nk.cell	Bone marrow	0.0469671	0.0347826
plasma.cell	Bone marrow	0.048566	0
capillary.endothelial.cell	Skeletal muscle	0.0621328	0.0731707
cd4.positive..alpha.beta.t.cell	Skeletal muscle	0.00307357	0.0292683
cd8.positive..alpha.beta.t.cell	Skeletal muscle	0.00186749	0.0146341
endothelial.cell.of.artery	Skeletal muscle	0.00505778	0.0243902
endothelial.cell.of.lymphatic.vessel	Skeletal muscle	0.00264561	0.0243902
endothelial.cell.of.vascular.tree	Skeletal muscle	0.111543	0.0390244
erythrocyte	Skeletal muscle	0.000700307	0.0195122
fast.muscle.cell	Skeletal muscle	0.0078201	0.195122
macrophage	Skeletal muscle	0.0576197	0.0390244
mast.cell	Skeletal muscle	0.000661401	0.0341463
mature.nk.t.cell	Skeletal muscle	0.00171186	0.0146341
mesenchymal.stem.cell	Skeletal muscle	0.495078	0.0585366
mesothelial.cell	Skeletal muscle	0.000427966	0.0292683
pericyte.cell	Skeletal muscle	0.058748	0.0390244
skeletal.muscle.satellite.stem.cell	Skeletal muscle	0.164183	0.0536585
slow.muscle.cell	Skeletal muscle	0.00431856	0.141463
smooth.muscle.cell	Skeletal muscle	0.00167296	0.0195122
t.cell	Skeletal muscle	0.0137727	0.0780488
tendon.cell	Skeletal muscle	0.00696417	0.0731707
cd1c.positive.myeloid.dendritic.cell	Spleen	0.00150678	0.0175439
cd4.positive..alpha.beta.memory.t.cell	Spleen	0.0521723	0.0350877
cd8.positive..alpha.beta.memory.t.cell	Spleen	0.124404	0.0526316
cd8.positive..alpha.beta.t.cell	Spleen	0.00128704	0.0526316
cd141.positive.myeloid.dendritic.cell	Spleen	0.00147539	0.0175439
classical.monocyte	Spleen	0.129144	0.0701754
endothelial.cell	Spleen	0.0179244	0.0526316
erythrocyte	Spleen	0.00514817	0.210526
hematopoietic.stem.cell	Spleen	0.00229156	0.0175439
innate.lymphoid.cell	Spleen	0.0035786	0
intermediate.monocyte	Spleen	0.00392391	0.0526316
macrophage	Spleen	0.0411853	0.0701754
mature.nk.t.cell	Spleen	0.0114578	0
memory.b.cell	Spleen	0.185711	0.0350877
naive.b.cell	Spleen	0.0310773	0.0175439
naive.thymus.derived.cd4.positive..alpha.beta.t.cell	Spleen	0.0364139	0.0350877
naive.thymus.derived.cd8.positive..alpha.beta.t.cell	Spleen	0.0179872	0.0350877
neutrophil	Spleen	0.138373	0.0526316
nk.cell	Spleen	0.061213	0.0175439
plasma.cell	Spleen	0.0937343	0
plasmacytoid.dendritic.cell	Spleen	0.00122426	0.0350877
platelet	Spleen	0.000565043	0.0350877
regulatory.t.cell	Spleen	0.00743973	0.0526316
type.i.nk.t.cell	Spleen	0.0307634	0.0350877
basal.cell	Tongue	0.401864	0.05
capillary.endothelial.cell	Tongue	0.0073373	0.25
endothelial.cell.of.artery	Tongue	0.00286155	0.1
endothelial.cell.of.lymphatic.vessel	Tongue	0.00315504	0.05
epithelial.cell	Tongue	0.15511	0.05
fibroblast	Tongue	0.0158486	0.15
immune.cell	Tongue	0.118424	0
keratinocyte	Tongue	0.267738	0.05
pericyte.cell	Tongue	0.00689706	0
schwann.cell	Tongue	0.00073373	0.05
tongue.muscle.cell	Tongue	0.00410889	0.05
vein.endothelial.cell	Tongue	0.0159219	0.2
goblet.cell	Trachea	0.0163572	0.2
b.cell	Trachea	0.0507294	0
basal.cell	Trachea	0.449492	0
cd4.positive..alpha.beta.t.cell	Trachea	0.00718391	0
cd8.positive..alpha.beta.t.cell	Trachea	0.0512821	0
ciliated.cell	Trachea	0.0289567	0
connective.tissue.cell	Trachea	0.0275199	0.2
double.positive..alpha.beta.thymocyte	Trachea	0.00066313	0
endothelial.cell	Trachea	0.0248674	0.2
fibroblast	Trachea	0.125442	0.2
ionocyte	Trachea	0.00132626	0
macrophage	Trachea	0.058687	0
mast.cell	Trachea	0.00674182	0
mucus.secreting.cell	Trachea	0.00552608	0
neutrophil	Trachea	0.0803492	0
plasma.cell	Trachea	0.01271	0
secretory.cell	Trachea	0.0247569	0
serous.cell.of.epithelium.of.trachea	Trachea	0.00386826	0.2
smooth.muscle.cell	Trachea	0.0091733	0
t.cell	Trachea	0.0143678	0

## Sheet: Figure 5B
Cell class	Cell-type susceptibility
Immunocytes	0.0574713
Immunocytes	0.0344828
Others	0.0689655
Fibroblasts	0.0804598
Immunocytes	0.0229885
Epithelia	0
Immunocytes	0.0114943
Myocytes	0.0229885
Endothelia	0.0344828
Endothelia	0.0344828
Endothelia	0.0574713
Immunocytes	0.0344828
Epithelia	0.0229885
Immunocytes	0.0229885
Endothelia	0.0344828
Endothelia	0.0344828
Fibroblasts	0
Immunocytes	0.045977
Epithelia	0.0344828
Endothelia	0.0229885
Immunocytes	0.0344828
Epithelia	0.0114943
Fibroblasts	0
Immunocytes	0.0344828
Immunocytes	0.0229885
Immunocytes	0.0229885
Others	0.0229885
Immunocytes	0
Immunocytes	0.0114943
Epithelia	0.0229885
Epithelia	0.0114943
Epithelia	0.0344828
Epithelia	0
Myocytes	0
Epithelia	0.0114943
Epithelia	0.0229885
Myocytes	0.0229885
Endothelia	0.0344828
Immunocytes	0.0608696
Immunocytes	0.0521739
Immunocytes	0.0347826
Others	0.191304
Stem cells	0.130435
Immunocytes	0.0434783
Stem cells	0.026087
Immunocytes	0.0521739
Immunocytes	0.026087
Immunocytes	0.0782609
Stem cells	0.130435
Immunocytes	0.0173913
Immunocytes	0.0608696
Immunocytes	0.0608696
Immunocytes	0.0347826
Immunocytes	0
Endothelia	0.0731707
Immunocytes	0.0292683
Immunocytes	0.0146341
Endothelia	0.0243902
Endothelia	0.0243902
Endothelia	0.0390244
Others	0.0195122
Myocytes	0.195122
Immunocytes	0.0390244
Immunocytes	0.0341463
Immunocytes	0.0146341
Stem cells	0.0585366
Epithelia	0.0292683
Others	0.0390244
Stem cells	0.0536585
Myocytes	0.141463
Myocytes	0.0195122
Immunocytes	0.0780488
Others	0.0731707
Immunocytes	0.0175439
Immunocytes	0.0350877
Immunocytes	0.0526316
Immunocytes	0.0526316
Immunocytes	0.0175439
Immunocytes	0.0701754
Endothelia	0.0526316
Others	0.210526
Stem cells	0.0175439
Immunocytes	0
Immunocytes	0.0526316
Immunocytes	0.0701754
Immunocytes	0
Immunocytes	0.0350877
Immunocytes	0.0175439
Immunocytes	0.0350877
Immunocytes	0.0350877
Immunocytes	0.0526316
Immunocytes	0.0175439
Immunocytes	0
Immunocytes	0.0350877
Others	0.0350877
Immunocytes	0.0526316
Immunocytes	0.0350877
Epithelia	0.05
Endothelia	0.25
Endothelia	0.1
Endothelia	0.05
Epithelia	0.05
Fibroblasts	0.15
Immunocytes	0
Epithelia	0.05
Others	0
Others	0.05
Myocytes	0.05
Endothelia	0.2
Epithelia	0.2
Immunocytes	0
Epithelia	0
Immunocytes	0
Immunocytes	0
Epithelia	0
Others	0.2
Immunocytes	0
Endothelia	0.2
Fibroblasts	0.2
Epithelia	0
Immunocytes	0
Immunocytes	0
Epithelia	0
Immunocytes	0
Immunocytes	0
Epithelia	0
Epithelia	0.2
Myocytes	0
Immunocytes	0
