# Supplementary material for: Affected cell types for hundreds of Mendelian diseases revealed by analysis of human and mouse single-cell data
Source: eLife. 2024 Jan 10;13:e84613. doi: 10.7554/eLife.84613 (PMC10830129; doi:10.7554/eLife.84613)
Supplement: Supplementary file 1. [file elife-84613-supp1.xlsx]

## Sheet: Supplementary File 1
Supplementary File 1. Diseases, disease genes, and likely-affected cell types of each tissue.
Data per tissue appear in distinct tabs, as follows: 1A Bone marrow, 1B Lung, 1C Skeletal muscle, 1D Spleen, 1E Tongue, and 1F Trachea.

## Sheet: Bone marrow
Supplementary File 1A. Diseases, disease genes, and likely-affected cell types of bone marrow.
Disease accession (OMIM)	Disease name (OMIM)	Gene accession (OMIM)	Gene symbol (OMIM)	Mouse ortholog (MGI)	Known molecular basis (1=Yes, 0=No)	Germline aberrations (1=Yes, 0=No)	Phenotypic series accession (OMIM)	Phenotypic series name (OMIM)	Expressed in human tissue (1=Yes, 0=No)	Expressed in mouse tissue (1=Yes, 0=No)	Inflicted tissue (ODiseA)	Human likely-affected cell types	Mouse similar likely-affected cell types
102700	Severe Combined Immunodeficiency, Autosomal Recessive, T Cell-negative,b Cell-negative, Nk Cell-negative, Due To Adenosine Deaminase Deficiency	608958	ADA	Ada	1	1			1	1	Yes
102900	Adenosine Triphosphate, Elevated, Of Erythrocytes	609712	PKLR	Pklr	1	1			1	1	Yes	['erythroid progenitor']	['proerythroblast']
105150	Amyloidosis Vi	604312	CST3	Cst3	1	1			1	1	No
105650	Diamond-blackfan Anemia 1	603474	RPS19	Rps19	1	1	PS105650	Diamond-Blackfan anemia	1	1	Yes	['cd4-positive, alpha-beta t cell', 'hematopoietic stem cell']	['hematopoietic stem cell', 'T cell', 'mature B cell']
112250	Diaphyseal Medullary Stenosis With Malignant Fibrous Histiocytoma	156540	MTAP	Mtap	1	1			1	1	Yes
116860	Cerebral Cavernous Malformations	604214	KRIT1	Krit1	1	1	PS116860	Cerebral cavernous malformations	1	1	No
116920	Leukocyte Adhesion Deficiency, Type I	600065	ITGB2	Itgb2	1	1			1	1	Yes
120100	Familial Cold Inflammatory Syndrome 1	606416	NLRP3	Nlrp3	1	1	PS120100	Familial cold autoinflammatory syndrome	1	1	Yes
122470	Cornelia De Lange Syndrome 1	608667	NIPBL	Nipbl	1	1	PS122470	Cornelia de Lange syndrome	1	1	No
122700	Coumarin Resistance	601130	CYP2C9	Cyp2c65	1	1			0	0	No
122700	Coumarin Resistance	601130	CYP2C9	Cyp2c66	1	1			0	0	No
122700	Coumarin Resistance	608547	VKORC1	Vkorc1	1	1			1	1	No
122700	Coumarin Resistance	122720	CYP2A6	Cyp2a4	1	1			0	0	No
122700	Coumarin Resistance	122720	CYP2A6	Cyp2a5	1	1			0	0	No
124000	Mitochondrial Complex Iii Deficiency	603647	BCS1L	Bcs1l	1	1	PS124000	Mitochondrial complex III deficiency, nuclear type	1	1	No
124900	Deafness, Autosomal Dominant Nonsyndromic Sensorineural 1	602121	DIAPH1	Diaph1	1	1	PS124900	Deafness, autosomal dominant	1	0
127000	Kenny-caffey Syndrome, Type 2	615292	FAM111A	Fam111a	1	1	PS127000	Kenny-Caffey syndrome	1	1	Yes	['granulocyte']
127550	Dyskeratosis Congenita, Autosomal Dominant	602322	TERC		1	1	PS127550	Dyskeratosis congenita	0	0	Yes		['precursor B cell', 'myelocyte', 'hematopoietic stem cell']
130000	Ehlers-danlos Syndrome, Type I	120215	COL5A1	Col5a1	1	1	PS130000	Ehlers-Danlos syndrome	1	1	No
130010	Ehlers-danlos Syndrome, Classic Type, 2	120190	COL5A2	Col5a2	1	1	PS130000	Ehlers-Danlos syndrome	0	0
130050	Ehlers-danlos Syndrome, Vascular Type	120180	COL3A1	Col3a1	1	1	PS130000	Ehlers-Danlos syndrome	0	0
130060	Ehlers-danlos Syndrome, Type Vii, Autosomal Dominant	120150	COL1A1	Col1a1	1	1	PS130000	Ehlers-Danlos syndrome	0	0
130080	Ehlers-danlos Syndrome, Periodontal Type, 1	613785	C1R	C1rb	1	1	PS130000	Ehlers-Danlos syndrome	0	0
130080	Ehlers-danlos Syndrome, Periodontal Type, 1	613785	C1R	C1ra	1	1	PS130000	Ehlers-Danlos syndrome	0	0
130600	Elliptocytosis 2	182860	SPTA1	Spta1	1	1			1	0		['erythrocyte']
131300	Camurati-engelmann Disease	190180	TGFB1	Tgfb1	1	1			0	1	Yes
131950	Epidermolysis Bullosa Simplex, Ogna Type	601282	PLEC	Plec	1	1			1	1	No
133100	Erythrocytosis, Familial, 1	133171	EPOR	Epor	1	1	PS133100	Erythrocytosis, familial	1	1	Yes
133180	Erythroleukemia, Familial, Susceptibility To	190151	ERBB3	Erbb3	1	1			0	0
133780	Exudative Vitreoretinopathy 1	604579	FZD4	Fzd4	1	1	PS133780	Exudative vitreoretinopathy	0	0
139090	Gray Platelet Syndrome	614169	NBEAL2	Nbeal2	1	1	PS231200	Bleeding disorder, platelet-type	1	1	Yes
140700	Heinz Body Anemias	141900	HBB	Hbb-bt	1	1			1	0	Yes	['erythrocyte']	['reticulocyte', 'erythroblast']
140700	Heinz Body Anemias	141900	HBB	Hbb-bs	1	1			1	0	Yes	['erythrocyte']	['reticulocyte', 'erythroblast']
140700	Heinz Body Anemias	141850	HBA2	Hba-a1	1	1			1	1	Yes	['erythrocyte']	['reticulocyte', 'erythroblast']
140700	Heinz Body Anemias	141850	HBA2	Hba-a2	1	1			1	1	Yes	['erythrocyte']	['reticulocyte', 'erythroblast']
140700	Heinz Body Anemias	141800	HBA1	Hba-a1	1	1			1	1	Yes	['erythrocyte']	['reticulocyte', 'erythroblast']
140700	Heinz Body Anemias	141800	HBA1	Hba-a2	1	1			1	1	Yes	['erythrocyte']	['reticulocyte', 'erythroblast']
141749	Fetal Hemoglobin Quantitative Trait Locus 1	141900	HBB	Hbb-bt	1	1			1	0		['erythrocyte']
141749	Fetal Hemoglobin Quantitative Trait Locus 1	141900	HBB	Hbb-bs	1	1			1	0		['erythrocyte']
141749	Fetal Hemoglobin Quantitative Trait Locus 1	142200	HBG1		1	1			0	0		['erythrocyte']
141749	Fetal Hemoglobin Quantitative Trait Locus 1	142250	HBG2	Hbb-y	1	1			0	0		['erythrocyte']
142680	Periodic Fever, Familial, Autosomal Dominant	191190	TNFRSF1A	Tnfrsf1a	1	1			1	1	Yes
145600	Malignant Hyperthermia, Susceptibility To, 1	180901	RYR1	Ryr1	1	1	PS145600	Malignant hyperthermia	0	1	No
147060	Hyper-ige Recurrent Infection Syndrome	102582	STAT3	Stat3	1	1	PS147060	Hyper-IgE recurrent infection syndrome	1	1	Yes	['cd24 neutrophil', 'nampt neutrophil', 'neutrophil']	['monocyte', 'conventional dendritic cell', 'neutrophilic myeloblast']
147750	Ivic Syndrome	607343	SALL4	Sall4	1	1			0	0
147920	Kabuki Syndrome	602113	KMT2D	Kmt2d	1	1	PS147920	Kabuki syndrome	1	0
150550	Periodic Fever, Immunodeficiency, And Thrombocytopenia Syndrome	604734	WDR1	Wdr1	1	1			1	1	Yes
151623	Li-fraumeni Syndrome 1	191170	TP53	Trp53	1	1	PS151623	Li-Fraumeni syndrome	1	1	Yes
152700	Systemic Lupus Erythematosus	600716	PTPN22	Ptpn22	1	1			1	1	Yes	['neutrophil']	['monocyte']
152700	Systemic Lupus Erythematosus	146790	FCGR2A	Fcgr3	1	1			1	1	Yes	['neutrophil']	['monocyte']
152700	Systemic Lupus Erythematosus	604590	FCGR2B	Fcgr2b	1	1			1	1	Yes	['neutrophil']	['monocyte']
152700	Systemic Lupus Erythematosus	123890	CTLA4	Ctla4	1	1			1	1	Yes	['neutrophil']	['monocyte']
152700	Systemic Lupus Erythematosus	606609	TREX1	Trex1	1	1			0	1	Yes	['neutrophil']	['monocyte']
152700	Systemic Lupus Erythematosus	125505	DNASE1	Dnase1	1	1			1	0	Yes	['neutrophil']	['monocyte']
153670	Bernard-soulier Syndrome, Benign Autosomal Dominant	606672	GP1BA	Gp1ba	1	1			1	0		['myeloid progenitor']
154800	Mast Cell Disease	164920	KIT	Kit	1	1			1	1	Yes		['hematopoietic stem cell']
155100	May-hegglin Anomaly	160775	MYH9	Myh9	1	1	PS231200	Bleeding disorder, platelet-type	1	1	Yes
158310	Mucoepithelial Dysplasia, Hereditary	184756	SREBF1	Srebf1	1	1			1	1	NA
158350	Cowden Disease	601728	PTEN	Pten	1	1	PS158350	Cowden disease	1	1	Yes	['neutrophil']
159550	Ataxia-pancytopenia Syndrome	611170	SAMD9L	Samd9l	1	1			1	1	Yes	['cd24 neutrophil']	['band form neutrophil']
162800	Cyclic Hematopoiesis	130130	ELANE	Elane	1	1			1	1	Yes	['granulocyte']	['myelocyte']
163950	Noonan Syndrome 1	176876	PTPN11	Ptpn11	1	1	PS163950	Noonan syndrome	1	1	Yes
166200	Osteogenesis Imperfecta, Type I	120150	COL1A1	Col1a1	1	1	PS166200	Osteogenesis imperfecta	0	0
166600	Osteopetrosis, Autosomal Dominant 2	602727	CLCN7	Clcn7	1	1	PS607634	Osteopetrosis, autosomal dominant	1	0			['segmented neutrophil of bone marrow']
166900	Ovalocytosis, Hereditary Hemolytic	109270	SLC4A1	Slc4a1	1	1			1	1	Yes	['erythrocyte']
167800	Pancreatitis, Hereditary	601405	CTRC	Ctrc	1	1			0	0
167800	Pancreatitis, Hereditary	167790	SPINK1	Spink1	1	1			0	0
167800	Pancreatitis, Hereditary	602421	CFTR	Cftr	1	1			0	0
167800	Pancreatitis, Hereditary	276000	PRSS1	Try10	1	1			0	0
167800	Pancreatitis, Hereditary	601564	PRSS2	Prss2	1	1			0	0
169400	Pelger-huet Anomaly	600024	LBR	Lbr	1	1			1	1	Yes
170100	Prolidase Deficiency	613230	PEPD	Pepd	1	1			1	1	Yes
171300	Pheochromocytoma	605995	KIF1B	Kif1b	1	1			1	1	NA
171300	Pheochromocytoma	185470	SDHB	Sdhb	1	1			1	1	NA
171300	Pheochromocytoma	613403	TMEM127	Tmem127	1	1			1	1	NA
171300	Pheochromocytoma	608537	VHL	Vhl	1	1			1	1	NA
171300	Pheochromocytoma	600837	GDNF	Gdnf	1	1			0	0	NA
171300	Pheochromocytoma	164761	RET	Ret	1	1			0	0	NA
171300	Pheochromocytoma	602690	SDHD	Sdhd	1	1			1	1	NA
171300	Pheochromocytoma	154950	MAX	Max	1	1			1	1	NA
174000	Medullary Cystic Kidney Disease 1	158340	MUC1		1	1	PS162000	Tubulointerstitial kidney disease	1	0
174900	Juvenile Polyposis Syndrome Juvenile Intestinal Polyposis Polyposis, Familial, Of Entire Gastrointestinal Tract Juvenile Polyposis Of Stomach, Included Juvenile Polyposis Coli, Included	601299	BMPR1A	Bmpr1a	1	1			0	0	Yes
174900	Juvenile Polyposis Syndrome Juvenile Intestinal Polyposis Polyposis, Familial, Of Entire Gastrointestinal Tract Juvenile Polyposis Of Stomach, Included Juvenile Polyposis Coli, Included	600993	SMAD4	Smad4	1	1			1	1	Yes
175050	Juvenile Polyposis/hereditary Hemorrhagic Telangiectasia Syndrome	600993	SMAD4	Smad4	1	1			1	1	Yes
175200	Peutz-jeghers Syndrome	602216	STK11	Stk11	1	1			1	1	Yes
175780	Brain Small Vessel Disease 1 With Or Without Ocular Anomalies	120130	COL4A1	Col4a1	1	1	PS175780	Brain small vessel disease	0	0
176860	Thrombophilia, Hereditary, Due To Protein C Deficiency, Autosomaldominant	612283	PROC	Proc	1	1	PS188050	Thrombophilia	0	0	Yes		['monocyte', 'promyelocyte', 'neutrophilic myeloblast']
177000	Protoporphyria, Erythropoietic, 1	612386	FECH	Fech	1	1	PS177000	Protoporphyria, erythropoietic	1	1	Yes	['erythrocyte']	['reticulocyte', 'erythroblast']
177820	Pseudo-von Willebrand Disease	606672	GP1BA	Gp1ba	1	1	PS231200	Bleeding disorder, platelet-type	1	0	Yes
177850	Pseudoxanthoma Elasticum, Forme Frustepseudoxanthoma Elasticum, Heterozygous, Included	603234	ABCC6	Abcc6	1	1			0	0
178600	Pulmonary Hypertension, Primary, 1	600799	BMPR2	Bmpr2	1	1	PS178600	Pulmonary hypertension, primary	1	0		['monocyte']
180000	Retinal Arteries, Tortuosity Of	120130	COL4A1	Col4a1	1	1			0	0
180200	Retinoblastoma	614041	RB1	Rb1	1	1			1	1	Yes		['proerythroblast']
180849	Rubinstein-taybi Syndrome 1	600140	CREBBP	Crebbp	1	1	PS180849	Rubinstein-Taybi syndrome	1	1	No
181000	Sarcoidosis, Susceptibility To, 1	142857	HLA-DRB1		1	1			1	0
182170	Anemia, Sideroblastic, Autosomal Dominant	600548	HSPA9	Hspa9	1	1	PS300751	Anemia, Sideroblastic	1	1	Yes	['erythrocyte']	['proerythroblast', 'erythroblast']
182900	Spherocytosis, Hereditary	612641	ANK1	Ank1	1	1			1	1	Yes
185000	Overhydrated Hereditary Stomatocytosis	180297	RHAG	Rhag	1	1			1	1	Yes
185020	Cryohydrocytosis	109270	SLC4A1	Slc4a1	1	1			1	1	Yes	['erythrocyte']
185070	Stormorken Syndrome	605921	STIM1	Stim1	1	1			1	1	Yes
187300	Telangiectasia, Hereditary Hemorrhagic, Type 1	131195	ENG	Eng	1	1	PS187300	Telangiectasia, hereditary hemorrhagic	1	1	Yes	['erythroid progenitor']
187800	Bleeding Disorder, Platelet-type, 16	607759	ITGA2B	Itga2b	1	1	PS231200	Bleeding disorder, platelet-type	1	1	Yes
187800	Bleeding Disorder, Platelet-type, 16	173470	ITGB3	Itgb3	1	1	PS231200	Bleeding disorder, platelet-type	1	1	Yes
187900	Thrombasthenia-thrombocytopenia, Hereditary	604383	GFI1B	Gfi1b	1	1	PS231200	Bleeding disorder, platelet-type	1	1	Yes
187950	Thrombocythemia 1	600044	THPO	Thpo	1	1	PS187950	Thrombocythemia	0	0	Yes		['hematopoietic stem cell']
188000	Thrombocytopenia 2	610855	ANKRD26	Ankrd26	1	1	PS313900	Thrombocytopenia	1	1	Yes
188050	Thrombophiliavenous Thromboembolism, Included	607093	MTHFR	Mthfr	1	1	PS188050	Thrombophilia	1	0	Yes		['monocyte', 'promyelocyte', 'neutrophilic myeloblast']
188050	Thrombophiliavenous Thromboembolism, Included	134570	F13A1	F13a1	1	1	PS188050	Thrombophilia	1	1	Yes		['monocyte', 'promyelocyte', 'neutrophilic myeloblast']
188050	Thrombophiliavenous Thromboembolism, Included	603924	HABP2	Habp2	1	1	PS188050	Thrombophilia	0	0	Yes		['monocyte', 'promyelocyte', 'neutrophilic myeloblast']
188050	Thrombophiliavenous Thromboembolism, Included	176930	F2	F2	1	1	PS188050	Thrombophilia	0	0	Yes		['monocyte', 'promyelocyte', 'neutrophilic myeloblast']
188055	Thrombophilia Due To Deficiency Of Activated Protein C Cofactor	612309	F5	F5	1	1	PS188050	Thrombophilia	1	1	Yes		['monocyte', 'promyelocyte', 'neutrophilic myeloblast']
189800	Preeclampsia/eclampsia 1	163729	NOS3	Nos3	1	1	PS189800	Preeclampsia/eclampsia	0	0
191900	Muckle-wells Syndrome	606416	NLRP3	Nlrp3	1	1			1	1	Yes
192315	Vasculopathy, Retinal, With Cerebral Leukodystrophy	606609	TREX1	Trex1	1	1			0	1	No
193220	Vitreoretinochoroidopathy	607854	BEST1	Best1	1	1			1	0
193235	Vitreoretinopathy, Neovascular Inflammatory	602537	CAPN5	Capn5	1	1			0	1	No
193300	Von Hippel-lindau Syndrome	608537	VHL	Vhl	1	1			1	1	Yes		['conventional dendritic cell']
193300	Von Hippel-lindau Syndrome	168461	CCND1	Ccnd1	1	1			0	1	Yes		['conventional dendritic cell']
193400	Von Willebrand Disease	613160	VWF	Vwf	1	1			1	0		['myeloid progenitor']
193670	Whim Syndrome	162643	CXCR4	Cxcr4	1	1			1	1	Yes
194380	Dehydrated Hereditary Stomatocytosis With Or Without Pseudohyperkalemiaand/or Perinatal Edema	611184	PIEZO1	Piezo1	1	1			1	0
200100	Abetalipoproteinemia	157147	MTTP	Mttp	1	1			0	0
200150	Choreoacanthocytosis	605978	VPS13A	Vps13a	1	1			1	1	Yes
202400	Afibrinogenemia, Congenitalhypofibrinogenemia, Congenital, Included	134830	FGB	Fgb	1	1			0	0
202400	Afibrinogenemia, Congenitalhypofibrinogenemia, Congenital, Included	134820	FGA	Fga	1	1			0	0
202400	Afibrinogenemia, Congenitalhypofibrinogenemia, Congenital, Included	134850	FGG	Fgg	1	1			0	0
202700	Neutropenia, Severe Congenital, Autosomal Dominant 1	130130	ELANE	Elane	1	1	PS202700	Neutropenia, severe congenital	1	1	Yes
203300	Hermansky-pudlak Syndrome	604982	HPS1	Hps1	1	1	PS203300	Hermansky-Pudlak syndrome	1	1	Yes	['nk cell']	['macrophage', 'monocyte']
204200	Ceroid Lipofuscinosis, Neuronal, 3	607042	CLN3	Cln3	1	1	PS256730	Ceroid lipofuscinoses	1	1	Yes
205950	Anemia, Congenital Sideroblastic, B6-nonresponsive	610819	SLC25A38	Slc25a38	1	1	PS300751	Anemia, Sideroblastic	1	1	Yes	['erythrocyte']	['proerythroblast', 'erythroblast']
206100	Anemia, Hypochromic Microcytic, With Iron Overload	600523	SLC11A2	Slc11a2	1	1	PS206100	Anemia, hypochromic microcytic, with iron overload	1	1	Yes		['proerythroblast']
206200	Iron-refractory Iron Deficiency Anemia	609862	TMPRSS6	Tmprss6	1	1			0	0
208050	Arterial Tortuosity Syndrome	606145	SLC2A10	Slc2a10	1	1			0	0
208085	Arthrogryposis, Renal Dysfunction, And Cholestasis	608552	VPS33B	Vps33b	1	1	PS208085	Arthrogryposis, renal dysfunction, and cholestasis	0	1	No
208400	Aspartylglucosaminuria	613228	AGA	Aga	1	1			1	1	Yes
208900	Ataxia-telangiectasia	607585	ATM	Atm	1	1			1	1	Yes
209300	Atransferrinemia	190000	TF	Trf	1	1			0	1	Yes
209920	Bare Lymphocyte Syndrome, Type Ii	601863	RFX5		1	1			1	0	Yes	['naive b cell']
209920	Bare Lymphocyte Syndrome, Type Ii	601861	RFXAP	Rfxap	1	1			1	1	Yes	['naive b cell']
209920	Bare Lymphocyte Syndrome, Type Ii	600005	CIITA	Ciita	1	1			1	1	Yes	['naive b cell']
209920	Bare Lymphocyte Syndrome, Type Ii	603200	RFXANK	Rfxank	1	1			1	1	Yes	['naive b cell']
209950	Immunodeficiency 27a, Mycobacteriosis, Ar	107470	IFNGR1	Ifngr1	1	1	PS300755	Immunodeficiency (Select Examples)	1	1	Yes
210250	Sitosterolemia 1	605460	ABCG8	Abcg8	1	1	PS210250	Sitosterolemia	0	0
210370	Bietti Crystalline Corneoretinal Dystrophy	608614	CYP4V2	Cyp4v3	1	1			1	1	Yes		['monocyte']
210600	Seckel Syndrome 1	601215	ATR	Atr	1	1	PS210600	Seckel syndrome	1	0
210900	Bloom Syndrome	604610	BLM	Blm	1	1	PS210900	Microcephaly, growth restriction and increased sister chromatid exchange	1	1	Yes
212050	Candidiasis, Familial, 2	607212	CARD9	Card9	1	1	PS114580	Familial candidiasis	1	1	Yes
212065	Congenital Disorder Of Glycosylation, Type Ia	601785	PMM2	Pmm2	1	1	PS212065	Congenital disorders of glycosylation, type I	1	1	Yes	['myeloid progenitor']	['neutrophilic myeloblast']
212066	Congenital Disorder Of Glycosylation, Type Iia	602616	MGAT2	Mgat2	1	1	PS212066	Congenital disorders of glycosylation, type II	1	1	No
212350	Cataract And Cardiomyopathy	610345	AGK	Agk	1	1	PS603041	Mitochondrial DNA depletion syndrome	1	1	Yes
212750	Celiac Disease	146880	HLA-DQA1	H2-Aa	1	1	PS212750	Celiac disease	1	1	NA
212750	Celiac Disease	604305	HLA-DQB1	H2-Ab1	1	1	PS212750	Celiac disease	1	1	NA
214500	Chediak-higashi Syndrome	606897	LYST	Lyst	1	1			1	1	Yes
214800	Charge Syndrome	608166	SEMA3E	Sema3e	1	1			1	0	Yes	['cd24 neutrophil', 'nampt neutrophil', 'neutrophil']
214800	Charge Syndrome	608892	CHD7	Chd7	1	1			1	1	Yes	['cd24 neutrophil', 'nampt neutrophil', 'neutrophil']
214950	Bile Acid Synthesis Defect, Congenital, 4	604489	AMACR	Amacr	1	1	PS607765	Bile acid synthesis defect, congenital	0	0	Yes		['basophil']
215140	Hydrops-ectopic Calcification-moth-eaten Skeletal Dysplasia	600024	LBR	Lbr	1	1			1	1	NA
216340	Cleidocranial Dysplasia With Micrognathia, Absent Thumbs, And Distal	609390	FIG4	Fig4	1	1			1	1	Yes
216550	Cohen Syndrome	607817	VPS13B	Vps13b	1	1			1	1	Yes
217000	Complement Component 2 Deficiency	613927	C2	C2	1	1			0	0
220110	Mitochondrial Complex Iv Deficiency	185620	SURF1	Surf1	1	1	PS220110	Mitochondrial complex IV deficiency, nuclear-type	1	1	No
221900	Retinal Nonattachment, Nonsyndromic Congenital	609875	ATOH7	Atoh7	1	1	PS221900	Persistent hyperplastic primary vitreous	0	0
222300	Wolfram Syndrome 1	606201	WFS1	Wfs1	1	1			1	1	No
222470	Trichohepatoenteric Syndrome 1	614589	TTC37	Ttc37	1	1	PS222470	Trichohepatoenteric syndrome	1	1	Yes
222700	Lysinuric Protein Intolerance	603593	SLC7A7	Slc7a7	1	1			1	1	Yes	['macrophage', 'monocyte']
222800	Diphosphoglycerate Mutase Deficiency Of Erythrocyte	613896	BPGM	Bpgm	1	1			1	1	Yes	['erythrocyte']	['reticulocyte']
224100	Anemia, Dyserythropoietic Congenital, Type Ii	610512	SEC23B	Sec23b	1	1	PS224120	Anemia, congenital dyserythropoietic	1	1	Yes
224120	Anemia, Congenital Dyserythropoietic, Type Ia	607465	CDAN1	Cdan1	1	1	PS224120	Anemia, congenital dyserythropoietic	0	1	Yes
224230	Dyskeratosis Congenita, Autosomal Recessive, 1	606471	NOP10	Nop10	1	1	PS127550	Dyskeratosis congenita	1	1	Yes		['precursor B cell', 'myelocyte', 'hematopoietic stem cell']
225320	Ehlers-danlos Syndrome, Autosomal Recessive, Cardiac Valvular Form	120160	COL1A2	Col1a2	1	1	PS130000	Ehlers-Danlos syndrome	0	0
225400	Ehlers-danlos Syndrome, Type Vi	153454	PLOD1	Plod1	1	1	PS130000	Ehlers-Danlos syndrome	1	0
225410	Ehlers-danlos Syndrome, Type Vii, Autosomal Recessive	604539	ADAMTS2	Adamts2	1	1	PS130000	Ehlers-Danlos syndrome	1	0
225750	Aicardi-goutieres Syndrome 1	606609	TREX1	Trex1	1	1	PS225750	Aicardi-Goutieres syndrome	0	1	Yes		['proerythroblast', 'monocyte']
226300	Complement Hyperactivation, Angiopathic Thrombosis, And Protein-losing Enteropathy	125240	CD55	Cd55	1	1			1	1	Yes		['mature B cell']
226300	Complement Hyperactivation, Angiopathic Thrombosis, And Protein-losing Enteropathy	125240	CD55	Cd55b	1	1			1	0	Yes		['mature B cell']
226600	Epidermolysis Bullosa Dystrophica, Autosomal Recessive	120120	COL7A1	Col7a1	1	1			0	0
226600	Epidermolysis Bullosa Dystrophica, Autosomal Recessive	120353	MMP1	Mmp1a	1	1			0	0
226670	Epidermolysis Bullosa Simplex With Muscular Dystrophy	601282	PLEC	Plec	1	1			1	1	Yes
227300	Factor V And Factor Viii, Combined Deficiency Of	601567	LMAN1	Lman1	1	1			1	1	No
227400	Factor V Deficiency	612309	F5	F5	1	1			1	1	No
227500	Factor Vii Deficiency	613878	F7	F7	1	1			0	0
227600	Factor X Deficiency	613872	F10	F10	1	1			0	1	No
227645	Fanconi Anemia, Complementation Group C	613899	FANCC	Fancc	1	1	PS227650	Fanconi anemia	0	1	Yes	['erythroid progenitor', 'granulocyte', 'myeloid progenitor']	['precursor B cell', 'immature B cell']
227646	Fanconi Anemia, Complementation Group D2	613984	FANCD2	Fancd2	1	1	PS227650	Fanconi anemia	1	1	Yes	['erythroid progenitor', 'granulocyte', 'myeloid progenitor']	['precursor B cell', 'immature B cell']
227650	Fanconi Anemia	607139	FANCA	Fanca	1	1	PS227650	Fanconi anemia	1	1	Yes	['erythroid progenitor', 'granulocyte', 'myeloid progenitor']	['precursor B cell', 'immature B cell']
228000	Farber Lipogranulomatosis	613468	ASAH1	Asah1	1	1			1	1	Yes
228960	Flaujeac Factor Deficiency	612358	KNG1	Kng2	1	1			0	0
228960	Flaujeac Factor Deficiency	612358	KNG1	Kng1	1	1			0	0
229050	Folic Acid, Transport Defect Involving	611672	SLC46A1	Slc46a1	1	1			0	0
229100	Formiminotransferase Deficiency	606806	FTCD	Ftcd	1	1			0	0
229600	Fructose Intolerance, Hereditary	612724	ALDOB	Aldob	1	1			0	0
230000	Fucosidosis	612280	FUCA1	Fuca1	1	1			1	1	Yes
230400	Galactosemia	606999	GALT	Galt	1	1	PS230400	Galactosemia	1	1	Yes
230450	Gamma-glutamylcysteine Synthetase Deficiency, Hemolytic Anemia Dueto	606857	GCLC	Gclc	1	1			1	1	Yes
230500	Gm1-gangliosidosis, Type I	611458	GLB1	Glb1	1	1			1	1	Yes	['monocyte']
230600	Gm1-gangliosidosis, Type Ii	611458	GLB1	Glb1	1	1			1	1	Yes
230650	Gm1-gangliosidosis, Type Iii	611458	GLB1	Glb1	1	1			1	1	Yes
230800	Gaucher Disease, Type I	606463	GBA	Gba	1	1			1	1	Yes
230900	Gaucher Disease, Type Ii	606463	GBA	Gba	1	1			1	1	Yes
231000	Gaucher Disease, Type Iii	606463	GBA	Gba	1	1			1	1	Yes
231005	Gaucher Disease, Type Iiic	606463	GBA	Gba	1	1			1	1	Yes
231095	Ghosal Hematodiaphyseal Dysplasia	274180	TBXAS1	Tbxas1	1	1			1	1	Yes
231200	Bernard-soulier Syndrome	173515	GP9	Gp9	1	1	PS231200	Bleeding disorder, platelet-type	1	1	Yes
231200	Bernard-soulier Syndrome	606672	GP1BA	Gp1ba	1	1	PS231200	Bleeding disorder, platelet-type	1	0	Yes
231200	Bernard-soulier Syndrome	138720	GP1BB	Gp1bb	1	1	PS231200	Bleeding disorder, platelet-type	0	1	Yes
231900	Glutathione Synthetase Deficiency Of Erythrocytes, Hemolytic Anemiadue To	601002	GSS	Gss	1	1			1	1	Yes
232200	Glycogen Storage Disease Ia	613742	G6PC1	G6pc	1	1			0	0
232220	Glycogen Storage Disease Ib	602671	SLC37A4	Slc37a4	1	1			1	1	Yes
232800	Glycogen Storage Disease Vii	610681	PFKM	Pfkm	1	1			1	1	Yes
233600	Immunodeficiency 59 And Hypoglycemia	601746	HYOU1	Hyou1	1	1	PS300755	Immunodeficiency (Select Examples)	1	1	Yes
233650	Combined Cellular And Humoral Immune Defects With Granulomas	179615	RAG1	Rag1	1	1			0	1	Yes		['early pro-B cell']
233650	Combined Cellular And Humoral Immune Defects With Granulomas	179616	RAG2	Rag2	1	1			0	1	Yes		['early pro-B cell']
233690	Granulomatous Disease, Chronic, Autosomal Recessive, Cytochrome B-negative	608508	CYBA	Cyba	1	1	PS306400	Granulomatous disease, chronic	1	1	Yes	['nampt neutrophil', 'neutrophil']	['monocyte', 'neutrophilic metamyelocyte', 'band form neutrophil', 'segmented neutrophil of bone marrow']
233700	Granulomatous Disease, Chronic, Autosomal Recessive, Cytochrome B-positive, Type I	608512	NCF1	Ncf1	1	1	PS306400	Granulomatous disease, chronic	1	1	Yes	['nampt neutrophil', 'neutrophil']	['monocyte', 'neutrophilic metamyelocyte', 'band form neutrophil', 'segmented neutrophil of bone marrow']
233710	Granulomatous Disease, Chronic, Autosomal Recessive, Cytochrome B-positive, Type Ii	608515	NCF2	Ncf2	1	1	PS306400	Granulomatous disease, chronic	1	1	Yes	['nampt neutrophil', 'neutrophil']	['monocyte', 'neutrophilic metamyelocyte', 'band form neutrophil', 'segmented neutrophil of bone marrow']
234000	Factor Xii Deficiency	610619	F12	F12	1	1			0	0
234200	Neurodegeneration With Brain Iron Accumulation 1	606157	PANK2	Pank2	1	1	PS234200	Neurodegeneration with brain iron accumulation	1	1	No
235400	Hemolytic Uremic Syndrome, Atypical	134370	CFH	Cfh	1	1	PS235400	Hemolytic uremic syndrome	1	1	Yes
235400	Hemolytic Uremic Syndrome, Atypical	605336	CFHR3		1	1	PS235400	Hemolytic uremic syndrome	0	0	Yes
235400	Hemolytic Uremic Syndrome, Atypical	134371	CFHR1	Cfhr1	1	1	PS235400	Hemolytic uremic syndrome	0	0	Yes
235555	Bile Acid Synthesis Defect, Congenital, 2	604741	AKR1D1	Akr1d1	1	1	PS607765	Bile acid synthesis defect, congenital	0	0	Yes		['basophil']
235700	Hexokinase Deficiency Hemolytic Anemia	142600	HK1	Hk1	1	1			1	1	Yes
236000	Hodgkin Lymphoma	613169	KLHDC8B	Klhdc8b	1	1			1	0
236200	Homocystinuria Due To Cystathionine Beta-synthase Deficiency	613381	CBS	Cbs	1	1			0	0
236270	Homocystinuria-megaloblastic Anemia Due To Defect In Cobalamin Metabolism,cble Complementation Type	602568	MTRR	Mtrr	1	1			1	0
238700	Hyperlysinemia	605113	AASS	Aass	1	1			1	0
239200	Hyperparathyroidism, Neonatal Severe	601199	CASR	Casr	1	1	PS145000	Hyperparathyroidism	0	0
240500	Immunodeficiency, Common Variable, 2	604907	TNFRSF13B	Tnfrsf13b	1	1	PS607594	Immunodeficiency, common variable	1	1	Yes	['cd8-positive, alpha-beta t cell']	['macrophage']
241200	Bartter Syndrome, Antenatal, Type 2	600359	KCNJ1	Kcnj1	1	1	PS601678	Bartter syndrome	0	0
241500	Hypophosphatasia, Infantile	171760	ALPL	Alpl	1	1			1	1	Yes	['nampt neutrophil']	['precursor B cell']
242840	Immunodeficiency With Cleft Lip/palate, Cataract, Hypopigmentation,and Absent Corpus Callosum	615068	EPG5	Epg5	1	1			1	0
242860	Immunodeficiency-centromeric Instability-facial Anomalies Syndrome1	602900	DNMT3B	Dnmt3b	1	1	PS242860	Immunodeficiency-centromeric instability-facial anomalies	1	1	Yes		['hematopoietic stem cell']
242900	Immunoosseous Dysplasia, Schimke Type	606622	SMARCAL1	Smarcal1	1	1			1	1	Yes
243150	Gastrointestinal Defects And Immunodeficiency Syndrome	609332	TTC7A	Ttc7	1	1			1	1	Yes
243500	Isovaleric Acidemia	607036	IVD	Ivd	1	1			1	1	Yes
243700	Hyperimmunoglobulin E-recurrent Infection Syndrome, Autosomal Recessive	611432	DOCK8	Dock8	1	1	PS147060	Hyper-IgE recurrent infection syndrome	1	1	Yes	['cd24 neutrophil', 'nampt neutrophil', 'neutrophil']	['monocyte', 'conventional dendritic cell', 'neutrophilic myeloblast']
244460	Kenny-caffey Syndrome, Type 1	604934	TBCE	Tbce	1	1	PS127000	Kenny-Caffey syndrome	1	1	Yes	['granulocyte']
245200	Krabbe Disease	606890	GALC	Galc	1	1			1	0
245480	Specific Granule Deficiency	600749	CEBPE	Cebpe	1	1	PS245480	Specific granule deficiency	1	1	Yes	['cd24 neutrophil', 'granulocyte']	['neutrophilic metamyelocyte']
245900	Lecithin:cholesterol Acyltransferase Deficiency	606967	LCAT	Lcat	1	1			0	0
246450	3-hydroxy-3-methylglutaryl-coa Lyase Deficiency	613898	HMGCL	Hmgcl	1	1			1	1	Yes
248500	Mannosidosis, Alpha B, Lysosomal	609458	MAN2B1	Man2b1	1	1			1	1	Yes	['macrophage']
249100	Familial Mediterranean Fever, Ar	608107	MEFV	Mefv	1	1			1	1	Yes		['promyelocyte', 'neutrophilic myeloblast']
249270	Thiamine-responsive Megaloblastic Anemia Syndrome	603941	SLC19A2	Slc19a2	1	1	PS249270	Thiamine-responsive dysfunction syndrome	0	0
250250	Cartilage-hair Hypoplasia	157660	RMRP		1	1			0	0
250790	Methemoglobinemia And Ambiguous Genitalia	613218	CYB5A	Cyb5a	1	1			1	0
250800	Methemoglobinemia Due To Deficiency Of Methemoglobin Reductase	613213	CYB5R3		1	1			1	0
250940	Homocystinuria-megaloblastic Anemia, Cblg Complementation Type	156570	MTR	Mtr	1	1			1	0
251000	Methylmalonic Aciduria Due To Methylmalonyl-coa Mutase Deficiency	609058	MMUT	Mmut	1	1			1	0
251100	Methylmalonic Aciduria, Cbla Type	607481	MMAA	Mmaa	1	1			0	1	Yes
251110	Methylmalonic Aciduria, Cblb Type	607568	MMAB	Mmab	1	1			1	0
251260	Nijmegen Breakage Syndrome	602667	NBN	Nbn	1	1			1	1	Yes		['promyelocyte']
251290	Pseudo-torch Syndrome	602876	OCLN	Ocln	1	1	PS251290	Pseudo-TORCH syndrome	0	0			['macrophage']
251880	Mitochondrial Dna Depletion Syndrome, Hepatocerebral Form	601465	DGUOK	Dguok	1	1	PS603041	Mitochondrial DNA depletion syndrome	1	1	Yes
251900	Mitochondrial Myopathy, Episodic, With Optic Atrophy And Reversible Leukoencephalopathy	614585	FDX2	Fdx2	1	1			1	0
252270	Myelodysplasia And Leukemia Syndrome With Monosomy 7	611170	SAMD9L	Samd9l	1	1	PS252270	Monosomy 7 myelodysplasia and leukemia syndrome	1	1	Yes
253270	Holocarboxylase Synthetase Deficiency	609018	HLCS	Hlcs	1	1			0	1
253600	Muscular Dystrophy, Limb-girdle, Type 2a	114240	CAPN3	Capn3	1	1	PS253600	Muscular dystrophy, limb-girdle, autosomal recessive	0	0
254600	Myeloperoxidase Deficiency	606989	MPO	Mpo	1	1			1	1	Yes	['granulocyte']	['myelocyte']
254900	Epilepsy, Progressive Myoclonic 4, With Or Without Renal Failure	602257	SCARB2	Scarb2	1	1	PS254800	Epilepsy, progressive myoclonic	1	1	No
255125	Myopathy With Exercise Intolerance, Swedish Type	611911	ISCU	Iscu	1	1			1	1	No
256040	Proteasome-associated Autoinflammatory Syndrome 1 And Digenic Forms	177046	PSMB8	Psmb8	1	1	PS256040	Proteosome-associated autoinflammatory syndrome	1	1	Yes		['plasma cell', 'macrophage', 'conventional dendritic cell', 'promyelocyte']
256100	Nephronophthisis 1	607100	NPHP1	Nphp1	1	1	PS256100	Nephronophthisis	0	1
256500	Netherton Syndrome	605010	SPINK5	Spink5	1	1			0	0
256550	Neuraminidase Deficiency	608272	NEU1	Neu1	1	1			1	1	Yes		['myelocyte']
256700	Neuroblastoma	605995	KIF1B	Kif1b	1	1			1	1	Yes
257200	Niemann-pick Disease, Type A	607608	SMPD1	Smpd1	1	1			1	1	Yes
257220	Niemann-pick Disease, Type C1	607623	NPC1	Npc1	1	1			1	1	Yes		['macrophage']
257300	Mosaic Variegated Aneuploidy Syndrome 1	602860	BUB1B	Bub1b	1	1	PS257300	Mosaic variegated aneuploidy syndrome	1	1	Yes
258900	Orotic Aciduria	613891	UMPS	Umps	1	1			1	1	Yes		['precursor B cell', 'myelocyte']
259700	Osteopetrosis, Autosomal Recessive 1	604592	TCIRG1	Tcirg1	1	1	PS259700	Osteopetrosis, autosomal recessive	1	1	Yes
259710	Osteopetrosis, Autosomal Recessive 2	602642	TNFSF11	Tnfsf11	1	1	PS259700	Osteopetrosis, autosomal recessive	0	0	Yes
259720	Osteopetrosis, Autosomal Recessive 5	607649	OSTM1	Ostm1	1	1	PS259700	Osteopetrosis, autosomal recessive	1	1	Yes
259730	Osteopetrosis, Autosomal Recessive 3	611492	CA2	Car2	1	1	PS259700	Osteopetrosis, autosomal recessive	1	1	Yes
260400	Shwachman-diamond Syndrome	607444	SBDS	Sbds	1	1	PS260400	Schwachman-Diamond syndrome	1	1	Yes
260920	Hyper-igd Syndrome	251170	MVK	Mvk	1	1			0	1	Yes
261000	Intrinsic Factor Deficiency	609342	CBLIF	Cblif	1	1			0	0
261100	Megaloblastic Anemia 1	602997	CUBN	Cubn	1	1	PS261100	Imerslund-Grasbeck syndrome	0	0
261500	Eosinophil Peroxidase Deficiency	131399	EPX	Epx	1	1			0	0
262850	Plasmin Inhibitor Deficiency	613168	SERPINF2	Serpinf2	1	1			0	0
262890	Scott Syndrome	608663	ANO6	Ano6	1	1	PS231200	Bleeding disorder, platelet-type	1	1	Yes
263400	Erythrocytosis, Familial, 2	608537	VHL	Vhl	1	1	PS133100	Erythrocytosis, familial	1	1	Yes
263700	Porphyria, Congenital Erythropoietic	606938	UROS	Uros	1	1			1	1	Yes	['erythroid progenitor']
264800	Pseudoxanthoma Elasticum	603234	ABCC6	Abcc6	1	1			0	0	No
264800	Pseudoxanthoma Elasticum	608124	XYLT1	Xylt1	1	1			1	0	No
264800	Pseudoxanthoma Elasticum	608125	XYLT2	Xylt2	1	1			0	1	No
266120	Uridine 5-prime Monophosphate Hydrolase Deficiency, Hemolytic Anemiadue To	606224	NT5C3A	Nt5c3	1	1			1	1	Yes
266130	Glutathione Synthetase Deficiency	601002	GSS	Gss	1	1			1	1	Yes
266140	Pyropoikilocytosis, Hereditary	182860	SPTA1	Spta1	1	1			1	0		['erythrocyte']
266200	Pyruvate Kinase Deficiency Of Red Cells	609712	PKLR	Pklr	1	1			1	1	Yes	['erythroid progenitor']	['proerythroblast']
266265	Congenital Disorder Of Glycosylation, Type Iic	605881	SLC35C1	Slc35c1	1	1	PS212066	Congenital disorders of glycosylation, type II	1	1	Yes
266510	Refsum Disease, Infantile Form	601758	PEX12	Pex12	1	1	PS214100	Peroxisome biogenesis disorder	0	0
266900	Senior-loken Syndrome 1	607100	NPHP1	Nphp1	1	1	PS266900	Senior-Loken syndrome	0	1
266920	Short-rib Thoracic Dysplasia 9 With Or Without Polydactyly	614620	IFT140	Ift140	1	1	PS208500	Short-rib thoracic dysplasia	0	1	No
267500	Reticular Dysgenesia	103020	AK2	Ak2	1	1			1	1	Yes
268130	Revesz Syndrome	604319	TINF2	Tinf2	1	1	PS127550	Dyskeratosis congenita	1	1	Yes		['precursor B cell', 'myelocyte', 'hematopoietic stem cell']
268150	Anemia, Hemolytic, Rh-null, Regulator Type	180297	RHAG	Rhag	1	1			1	1	Yes	['erythrocyte']
269600	Sea-blue Histiocyte Disease	107741	APOE	Apoe	1	1			1	1	Yes		['monocyte']
269920	Infantile Sialic Acid Storage Disorder	604322	SLC17A5	Slc17a5	1	1			1	1	Yes
270970	Spherocytosis, Autosomal Recessive	182860	SPTA1	Spta1	1	1			1	0
271400	Asplenia, Isolated Congenital	150370	RPSA	Rpsa	1	1			1	1	Yes
271510	Spondyloepimetaphyseal Dysplasia, Sponastrime Type	604546	TONSL	Tonsl	1	1			1	0
273800	Glanzmann Thrombasthenia	607759	ITGA2B	Itga2b	1	1	PS231200	Bleeding disorder, platelet-type	1	1	Yes
273800	Glanzmann Thrombasthenia	173470	ITGB3	Itgb3	1	1	PS231200	Bleeding disorder, platelet-type	1	1	Yes
273900	Thrombocytopenia 3	602731	FYB1	Fyb	1	1	PS313900	Thrombocytopenia	1	1	Yes
274000	Thrombocytopenia-absent Radius Syndrome	605313	RBM8A	Rbm8a	1	1			1	1	Yes
274150	Thrombotic Thrombocytopenic Purpura, Congenital	604134	ADAMTS13	Adamts13	1	1			0	0
275350	Transcobalamin Ii Deficiency	613441	TCN2	Tcn2	1	1			1	1	Yes	['macrophage', 'monocyte']
275630	Chanarin-dorfman Syndrome	604780	ABHD5	Abhd5	1	1			1	1	Yes		['neutrophilic metamyelocyte']
276300	Mismatch Repair Cancer Syndrome	120436	MLH1	Mlh1	1	1	PS276300	Mismatch repair cancer syndrome	1	0	Yes	['erythroid progenitor', 'myeloid progenitor']	['precursor B cell']
276700	Tyrosinemia, Type I	613871	FAH	Fah	1	1	PS276700	Tyrosinemia	1	0
277380	Methylmalonic Aciduria And Homocystinuria, Cblf Type	612625	LMBRD1	Lmbrd1	1	1			1	1	Yes		['mature B cell']
277400	Methylmalonic Aciduria And Homocystinuria, Cblc Type	609831	MMACHC	Mmachc	1	1			0	0	Yes
277400	Methylmalonic Aciduria And Homocystinuria, Cblc Type	176763	PRDX1	Prdx1	1	1			1	1	Yes
277410	Methylmalonic Aciduria And Homocystinuria, Cbld Type	611935	MMADHC	Mmadhc	1	1			1	1	Yes
277450	Vitamin K-dependent Clotting Factors, Combined Deficiency Of, 1	137167	GGCX	Ggcx	1	1	PS277450	Vitamin K-dependent clotting factors, combined deficiency of	1	0	Yes
277480	Von Willebrand Disease, Recessive Form	613160	VWF	Vwf	1	1			1	0		['myeloid progenitor']
277900	Wilson Disease	606882	ATP7B	Atp7b	1	1			1	0
278000	Lysosomal Acid Lipase Deficiency	613497	LIPA	Lipa	1	1			1	1	Yes	['monocyte']
280000	Zunich Neuroectodermal Syndrome	605947	PIGL	Pigl	1	1			1	0
300048	Intestinal Pseudoobstruction, Neuronal, Chronic Idiopathic, X-linked	300017	FLNA	Flna	1	1			1	1	Yes
300049	Heterotopia, Periventricular, X-linked Dominant	300017	FLNA	Flna	1	1	PS300049	Periventricular nodular heterotopia	1	1	Yes
300299	Neutropenia, Severe Congenital, X-linked	300392	WAS	Was	1	1	PS202700	Neutropenia, severe congenital	1	1	Yes
300322	Lesch-nyhan Syndrome	308000	HPRT1	Hprt	1	1			1	1	Yes
300367	Dyserythropoietic Anemia With Thrombocytopeniamacrothrombocytopenia, X-linked, Included	305371	GATA1	Gata1	1	1			1	1	Yes	['erythroid progenitor']	['proerythroblast']
300400	Severe Combined Immunodeficiency, X-linked	308380	IL2RG	Il2rg	1	1	PS300755	Immunodeficiency (Select Examples)	1	1	Yes
300514	Fanconi Anemia, Complementation Group B	300515	FANCB	Fancb	1	1	PS227650	Fanconi anemia	1	0		['erythroid progenitor', 'granulocyte', 'myeloid progenitor']	['precursor B cell', 'immature B cell']
300635	Lymphoproliferative Syndrome, X-linked, 2	300079	XIAP	Xiap	1	1	PS308240	Lymphoproliferative syndrome	1	1	Yes	['cd8-positive, alpha-beta t cell']	['T cell']
300653	Phosphoglycerate Kinase 1 Deficiency	311800	PGK1	Pgk1	1	1			1	1	Yes
300751	Anemia, Sideroblastic, X-linked	301300	ALAS2	Alas2	1	1	PS300751	Anemia, Sideroblastic	1	1	Yes	['erythrocyte']	['proerythroblast', 'erythroblast']
300752	Protoporphyria, Erythropoietic, X-linked	301300	ALAS2	Alas2	1	1	PS177000	Protoporphyria, erythropoietic	1	1	Yes	['erythrocyte']	['reticulocyte', 'erythroblast']
300807	Thrombophilia, X-linked, Due To Factor Ix Defect	300746	F9	F9	1	1	PS188050	Thrombophilia	0	0	Yes		['monocyte', 'promyelocyte', 'neutrophilic myeloblast']
300835	Anemia, X-linked, With Or Without Neutropenia And/or Platelet Abnormalities	305371	GATA1	Gata1	1	1			1	1	Yes	['erythroid progenitor']	['proerythroblast']
300842	Mcleod Syndrome	314850	XK	Xk	1	1			1	1	Yes
300853	Immunodeficiency, X-linked, With Magnesium Defect, Epstein-barr Virus Infection And Neoplasia	300715	MAGT1	Magt1	1	1			1	1	Yes
300908	Anemia, Nonspherocytic Hemolytic, Due To G6pd Deficiency	305900	G6PD	G6pdx	1	1			1	1	Yes
300934	Congenital Disorder Of Glycosylation, Type Iy	300090	SSR4	Ssr4	1	1	PS212065	Congenital disorders of glycosylation, type I	1	1	No	['myeloid progenitor']	['neutrophilic myeloblast']
300946	Diamond-blackfan Anemia 14 With Mandibulofacial Dysostosis	300945	TSR2	Tsr2	1	1	PS105650	Diamond-Blackfan anemia	1	1	Yes	['cd4-positive, alpha-beta t cell', 'hematopoietic stem cell']	['hematopoietic stem cell', 'T cell', 'mature B cell']
300972	Immunodeficiency 47	300197	ATP6AP1	Atp6ap1	1	1	PS212066	Congenital disorders of glycosylation, type II	1	1	Yes
300972	Immunodeficiency 47	300197	ATP6AP1	Atp6ap1	1	1	PS300755	Immunodeficiency (Select Examples)	1	1	Yes
300988	Immunodeficiency 50	309845	MSN	Msn	1	1	PS300755	Immunodeficiency (Select Examples)	1	1	Yes
300990	Midface Hypoplasia, Hearing Impairment, Elliptocytosis, And Nephrocalcinosis	300195	AMMECR1	Ammecr1	1	1			1	1	Yes
301000	Wiskott-aldrich Syndrome	300392	WAS	Was	1	1	PS300755	Immunodeficiency (Select Examples)	1	1	Yes
301015	Hemolytic Anemia, Congenital, X-linked	300516	ATP11C	Atp11c	1	1			1	1	Yes
301040	Alpha-thalassemia/mental Retardation Syndrome, Nondeletion Type, X-linked	300032	ATRX	Atrx	1	1			1	1	Yes
301045	Congenital Disorder Of Glycosylation, Type Iir	300556	ATP6AP2	Atp6ap2	1	1	PS212066	Congenital disorders of glycosylation, type II	1	1	Yes
301050	Alport Syndrome, X-linked	303630	COL4A5	Col4a5	1	1	PS301050	Alport syndrome	0	0
301310	Anemia, Sideroblastic, And Spinocerebellar Ataxia	300135	ABCB7	Abcb7	1	1			1	1	Yes
301500	Fabry Disease	300644	GLA	Gla	1	1			1	1	Yes
302060	Barth Syndrome	300394	TAFAZZIN	Taz	1	1	PS250950	3-Methylglutaconic aciduria	0	1	Yes
304150	Cutis Laxa, X-linked	300011	ATP7A	Atp7a	1	1			1	1	No
304790	Immunodysregulation, Polyendocrinopathy, And Enteropathy, X-linked	300292	FOXP3	Foxp3	1	1			0	0
305000	Dyskeratosis Congenita, X-linked	300126	DKC1	Dkc1	1	1	PS127550	Dyskeratosis congenita	1	1	Yes		['precursor B cell', 'myelocyte', 'hematopoietic stem cell']
306400	Chronic Granulomatous Disease, X-linked	300481	CYBB	Cybb	1	1	PS306400	Granulomatous disease, chronic	1	1	Yes	['nampt neutrophil', 'neutrophil']	['monocyte', 'neutrophilic metamyelocyte', 'band form neutrophil', 'segmented neutrophil of bone marrow']
306700	Hemophilia A	300841	F8	F8	1	1			0	0
306900	Hemophilia B	300746	F9	F9	1	1			0	0
308230	Immunodeficiency, X-linked, With Hyper-igm	300386	CD40LG	Cd40lg	1	1	PS300755	Immunodeficiency (Select Examples)	1	0	Yes
308230	Immunodeficiency, X-linked, With Hyper-igm	300386	CD40LG	Cd40lg	1	1	PS308230	Immunodeficiency with hyper-IgM	1	0	Yes	['cd4-positive, alpha-beta t cell']	['mature B cell']
308240	Lymphoproliferative Syndrome, X-linked, 1	300490	SH2D1A	Sh2d1a	1	1	PS300755	Immunodeficiency (Select Examples)	1	1	Yes
308240	Lymphoproliferative Syndrome, X-linked, 1	300490	SH2D1A	Sh2d1a	1	1	PS308240	Lymphoproliferative syndrome	1	1	Yes	['cd8-positive, alpha-beta t cell']	['T cell']
308300	Incontinentia Pigmenti	300248	IKBKG	Ikbkg	1	1			1	1	Yes
309400	Menkes Disease	300011	ATP7A	Atp7a	1	1			1	1	No
309580	Mental Retardation-hypotonic Facies Syndrome, X-linked, 1	300032	ATRX	Atrx	1	1			1	1	Yes
312700	Retinoschisis 1, X-linked, Juvenile	300839	RS1	Rs1	1	1			0	0
312863	Combined Immunodeficiency, X-linked	308380	IL2RG	Il2rg	1	1	PS300755	Immunodeficiency (Select Examples)	1	1	Yes
313900	Thrombocytopenia 1	300392	WAS	Was	1	1	PS313900	Thrombocytopenia	1	1	Yes
314050	Thrombocytopenia With Beta-thalassemia, X-linked	305371	GATA1	Gata1	1	1			1	1	Yes	['erythroid progenitor']	['proerythroblast']
600195	Venous Malformations, Multiple Cutaneous And Mucosal	600221	TEK	Tek	1	1			0	0
600376	Osler-rendu-weber Syndrome 2	601284	ACVRL1	Acvrl1	1	1	PS187300	Telangiectasia, hereditary hemorrhagic	0	1		['erythroid progenitor']
600462	Mitochondrial Myopathy And Sideroblastic Anemia	608109	PUS1	Pus1	1	1	PS600462	Myopathy, lactic acidosis, and sideroblastic anemia	1	1	Yes
600802	Scid, Autosomal Recessive, T-negative/b-positive Type	600173	JAK3	Jak3	1	1			1	1	Yes
600901	Fanconi Anemia, Complementation Group E	613976	FANCE	Fance	1	1	PS227650	Fanconi anemia	0	1	Yes	['erythroid progenitor', 'granulocyte', 'myeloid progenitor']	['precursor B cell', 'immature B cell']
601399	Platelet Disorder, Familial, With Associated Myeloid Malignancy	151385	RUNX1	Runx1	1	1			1	1	Yes
601457	Severe Combined Immunodeficiency, Autosomal Recessive, T Cell-negative,b Cell-negative, Nk Cell-positive	179615	RAG1	Rag1	1	1			0	1	Yes		['early pro-B cell']
601457	Severe Combined Immunodeficiency, Autosomal Recessive, T Cell-negative,b Cell-negative, Nk Cell-positive	179616	RAG2	Rag2	1	1			0	1	Yes		['early pro-B cell']
601495	Agammaglobulinemia 1, Autosomal Recessive	147020	IGHM		1	1	PS601495	Agammaglobulinemia	1	0		['memory b cell', 'naive b cell']	['early pro-B cell']
601626	Leukemia, Acute Myeloid	137295	GATA2	Gata2	1	1			1	1	Yes		['basophil']
601626	Leukemia, Acute Myeloid	600700	LPP	Lpp	1	1			1	1	Yes		['basophil']
601626	Leukemia, Acute Myeloid	604332	CHIC2	Chic2	1	1			1	1	Yes		['basophil']
601626	Leukemia, Acute Myeloid	187270	TERT	Tert	1	1			0	0	Yes		['basophil']
601626	Leukemia, Acute Myeloid	602409	MLLT10	Mllt10	1	1			1	1	Yes		['basophil']
601626	Leukemia, Acute Myeloid	116897	CEBPA	Cebpa	1	1			1	1	Yes		['basophil']
601626	Leukemia, Acute Myeloid	151385	RUNX1	Runx1	1	1			1	1	Yes		['basophil']
601705	T-cell Immunodeficiency, Congenital Alopecia, And Nail Dystrophy	600838	FOXN1	Foxn1	1	1			0	0
601709	Quebec Platelet Disorder	191840	PLAU	Plau	1	1	PS231200	Bleeding disorder, platelet-type	0	0	Yes
601776	Ehlers-danlos Syndrome, Musculocontractural Type	608429	CHST14	Chst14	1	1	PS130000	Ehlers-Danlos syndrome	1	0
601813	Exudative Vitreoretinopathy 4	603506	LRP5	Lrp5	1	1	PS133780	Exudative vitreoretinopathy	1	0
601815	Phosphoglycerate Dehydrogenase Deficiency	606879	PHGDH	Phgdh	1	1			1	1	No
601859	Autoimmune Lymphoproliferative Syndrome	134638	FASLG	Fasl	1	1			1	1	Yes	['cd8-positive, alpha-beta t cell']
601859	Autoimmune Lymphoproliferative Syndrome	134637	FAS	Fas	1	1			1	1	Yes	['cd8-positive, alpha-beta t cell']
601977	Thrombocythemia 2	159530	MPL	Mpl	1	1	PS187950	Thrombocythemia	1	1	Yes		['hematopoietic stem cell']
602079	Trimethylaminuria	136132	FMO3	Fmo3	1	1			0	0
602473	Encephalopathy, Ethylmalonic	608451	ETHE1	Ethe1	1	1			1	1	No
602579	Congenital Disorder Of Glycosylation, Type Ib	154550	MPI	Mpi	1	1	PS212065	Congenital disorders of glycosylation, type I	1	0		['myeloid progenitor']	['neutrophilic myeloblast']
602782	Histiocytosis-lymphadenopathy Plus Syndrome	612373	SLC29A3	Slc29a3	1	1			0	1	Yes
603075	Macular Degeneration, Age-related, 1	608548	HMCN1	Hmcn1	1	1	PS603075	Macular degeneration, age-related	0	0			['monocyte']
603075	Macular Degeneration, Age-related, 1	605336	CFHR3		1	1	PS603075	Macular degeneration, age-related	0	0			['monocyte']
603075	Macular Degeneration, Age-related, 1	134371	CFHR1	Cfhr1	1	1	PS603075	Macular degeneration, age-related	0	0			['monocyte']
603075	Macular Degeneration, Age-related, 1	107741	APOE	Apoe	1	1	PS603075	Macular degeneration, age-related	1	1	Yes		['monocyte']
603147	Congenital Disorder Of Glycosylation, Type Ic	604566	ALG6	Alg6	1	1	PS212065	Congenital disorders of glycosylation, type I	1	1	NA	['myeloid progenitor']	['neutrophilic myeloblast']
603278	Focal Segmental Glomerulosclerosis 1	604638	ACTN4	Actn4	1	1	PS603278	Focal segmental glomerulosclerosis	1	1	Yes
603284	Cerebral Cavernous Malformations 2	607929	CCM2	Ccm2	1	1	PS116860	Cerebral cavernous malformations	1	1	No
603285	Cerebral Cavernous Malformations 3	609118	PDCD10	Pdcd10	1	1	PS116860	Cerebral cavernous malformations	1	1	No
603467	Fanconi Anemia, Complementation Group F	613897	FANCF	Fancf	1	1	PS227650	Fanconi anemia	1	0	Yes	['erythroid progenitor', 'granulocyte', 'myeloid progenitor']	['precursor B cell', 'immature B cell']
603552	Hemophagocytic Lymphohistiocytosis, Familial, 4	605014	STX11	Stx11	1	1	PS267700	Hemophagocytic lymphohistiocytosis, familial	1	1	Yes	['nampt neutrophil', 'neutrophil']	['basophil']
603553	Hemophagocytic Lymphohistiocytosis, Familial, 2	170280	PRF1	Prf1	1	1	PS267700	Hemophagocytic lymphohistiocytosis, familial	1	0	Yes	['nampt neutrophil', 'neutrophil']	['basophil']
603554	Omenn Syndrome	605988	DCLRE1C	Dclre1c	1	1			1	1	Yes		['early pro-B cell']
603554	Omenn Syndrome	179615	RAG1	Rag1	1	1			0	1	Yes		['early pro-B cell']
603554	Omenn Syndrome	179616	RAG2	Rag2	1	1			0	1	Yes		['early pro-B cell']
603585	Congenital Disorder Of Glycosylation, Type Iif	605634	SLC35A1	Slc35a1	1	1	PS212066	Congenital disorders of glycosylation, type II	1	1	Yes
603903	Sickle Cell Anemia	141900	HBB	Hbb-bt	1	1			1	0		['erythrocyte']
603903	Sickle Cell Anemia	141900	HBB	Hbb-bs	1	1			1	0		['erythrocyte']
603909	Autoimmune Lymphoproliferative Syndrome, Type Iia	601762	CASP10		1	1			1	0
604131	Alpha-thalassemia	141850	HBA2	Hba-a1	1	1			1	1	Yes	['erythrocyte']	['reticulocyte', 'erythroblast']
604131	Alpha-thalassemia	141850	HBA2	Hba-a2	1	1			1	1	Yes	['erythrocyte']	['reticulocyte', 'erythroblast']
604131	Alpha-thalassemia	141800	HBA1	Hba-a1	1	1			1	1	Yes	['erythrocyte']	['reticulocyte', 'erythroblast']
604131	Alpha-thalassemia	141800	HBA1	Hba-a2	1	1			1	1	Yes	['erythrocyte']	['reticulocyte', 'erythroblast']
604173	Poikiloderma With Neutropenia	613276	USB1	Usb1	1	1			1	0
604250	Hemochromatosis, Type 3	604720	TFR2	Tfr2	1	1	PS235200	Hemochromatosis	1	1	Yes	['erythrocyte']
604278	Renal Tubular Acidosis, Proximal, With Ocular Abnormalities And Mentalretardation	603345	SLC4A4	Slc4a4	1	1			0	0
604290	Aceruloplasminemiahypoceruloplasminemia, Included	117700	CP	Cp	1	1			0	0
604369	Sialuria, Finnish Type	604322	SLC17A5	Slc17a5	1	1			1	1	NA
604416	Pyogenic Sterile Arthritis, Pyoderma Gangrenosum, And Acne	606347	PSTPIP1	Pstpip1	1	1			1	1	Yes
604498	Amegakaryocytic Thrombocytopenia, Congenital	159530	MPL	Mpl	1	1			1	1	Yes	['hematopoietic stem cell']	['hematopoietic stem cell']
604777	Ichthyosis, Lamellar, 3	611495	CYP4F22	Cyp4f39	1	1	PS242300	Ichthyosis, congenital, autosomal recessive	0	0
604928	Wolfram Syndrome 2	611507	CISD2	Cisd2	1	1			1	1	Yes
605027	Lymphoma, Non-hodgkin, Familial	170280	PRF1	Prf1	1	1			1	0		['nk cell']
605275	Noonan Syndrome 2	600574	LZTR1	Lztr1	1	1	PS163950	Noonan syndrome	0	1	Yes
605309	Macrocephaly/autism Syndrome	601728	PTEN	Pten	1	1			1	1	Yes
605432	Radioulnar Synostosis With Amegakaryocytic Thrombocytopenia	142958	HOXA11	Hoxa11	1	1	PS605432	Radioulnar synostosis with amegakaryocytic thrombocytopenia	0	0		['hematopoietic stem cell']
605714	Cerebral Amyloid Angiopathy, App-related	104760	APP	App	1	1			1	1	No
605724	Fanconi Anemia, Complementation Group D1	600185	BRCA2	Brca2	1	1	PS227650	Fanconi anemia	1	1	Yes	['erythroid progenitor', 'granulocyte', 'myeloid progenitor']	['precursor B cell', 'immature B cell']
606003	Transaldolase Deficiency	602063	TALDO1	Taldo1	1	1			1	1	Yes
606054	Propionic Acidemia	232050	PCCB	Pccb	1	1			1	0	Yes
606054	Propionic Acidemia	232000	PCCA	Pcca	1	1			1	1	Yes
606069	Hemochromatosis, Type 4	604653	SLC40A1	Slc40a1	1	1	PS235200	Hemochromatosis	1	1	Yes	['erythrocyte']
606164	Diamond-blackfan Anemia 15 With Mandibulofacial Dysostosis	603685	RPS28	Rps28	1	1	PS105650	Diamond-Blackfan anemia	1	1	Yes	['cd4-positive, alpha-beta t cell', 'hematopoietic stem cell']	['hematopoietic stem cell', 'T cell', 'mature B cell']
606176	Diabetes Mellitus, Permanent Neonatal 1	138079	GCK	Gck	1	1	PS606176	Diabetes mellitus, permanent neonatal	0	0
606367	Immunodeficiency 41 With Lymphoproliferation And Autoimmunity	147730	IL2RA	Il2ra	1	1	PS300755	Immunodeficiency (Select Examples)	1	1	Yes
606408	Ehlers-danlos-like Syndrome Due To Tenascin-x Deficiency	600985	TNXB	Tnxb	1	1	PS130000	Ehlers-Danlos syndrome	1	0
606593	Lig4 Syndrome	601837	LIG4	Lig4	1	1			1	1	Yes
606812	Fumarase Deficiency	136850	FH	Fh1	1	1			1	1	NA
606843	Immunodeficiency With Hyper-igm, Type 3	109535	CD40	Cd40	1	1	PS308230	Immunodeficiency with hyper-IgM	1	1	Yes	['cd4-positive, alpha-beta t cell']	['mature B cell']
606893	Vascular Malformation, Primary Intraosseous	606421	ELMO2	Elmo2	1	1			1	1	No
606966	Nephronophthisis 4	607215	NPHP4	Nphp4	1	1	PS256100	Nephronophthisis	0	0
606996	Senior-loken Syndrome 4	607215	NPHP4	Nphp4	1	1	PS266900	Senior-Loken syndrome	0	0
607091	Congenital Disorder Of Glycosylation, Type Iid	137060	B4GALT1	B4galt1	1	1	PS212066	Congenital disorders of glycosylation, type II	1	1	Yes
607115	Cinca Syndrome	606416	NLRP3	Nlrp3	1	1			1	1	NA
607143	Congenital Disorder Of Glycosylation, Type Ig	607144	ALG12	Alg12	1	1	PS212065	Congenital disorders of glycosylation, type I	1	0		['myeloid progenitor']	['neutrophilic myeloblast']
607236	Hypoprebetalipoproteinemia, Acanthocytosis, Retinitis Pigmentosa,and Pallidal Degeneration	606157	PANK2	Pank2	1	1			1	1	Yes
607271	Autoimmune Lymphoproliferative Syndrome, Type Iib	601763	CASP8	Casp8	1	1			1	1	Yes
607330	Lathosterolosis	602286	SC5D	Sc5d	1	1			1	1	Yes
607426	Coenzyme Q10 Deficiency, Primary, 1	609825	COQ2	Coq2	1	1	PS607426	Coenzyme Q10 deficiency, primary	1	1	Yes
607473	Vitamin K-dependent Clotting Factors, Combined Deficiency Of, 2	608547	VKORC1	Vkorc1	1	1	PS277450	Vitamin K-dependent clotting factors, combined deficiency of	1	1	No
607554	Atrial Fibrillation, Familial, 3	607542	KCNQ1	Kcnq1	1	1	PS608583	Atrial fibrillation, familial	1	0
607594	Immunodeficiency, Common Variable, 1	604558	ICOS	Icos	1	1	PS607594	Immunodeficiency, common variable	1	1	Yes	['cd8-positive, alpha-beta t cell']	['macrophage']
607616	Niemann-pick Disease, Type B	607608	SMPD1	Smpd1	1	1			1	1	Yes
607624	Griscelli Syndrome, Type 2	603868	RAB27A	Rab27a	1	1	PS214450	Griscelli syndrome	1	1	Yes
607625	Niemann-pick Disease, Type C2	601015	NPC2	Npc2	1	1			1	1	Yes	['macrophage', 'monocyte']
607626	Ichthyosis, Leukocyte Vacuoles, Alopecia, And Sclerosing Cholangitis	603718	CLDN1	Cldn1	1	1			0	1	Yes		['neutrophilic metamyelocyte', 'band form neutrophil']
607676	Immunodeficiency 67	606883	IRAK4	Irak4	1	1	PS300755	Immunodeficiency (Select Examples)	1	1	Yes
607765	Bile Acid Synthesis Defect, Congenital, 1	607764	HSD3B7	Hsd3b7	1	1	PS607765	Bile acid synthesis defect, congenital	0	1	Yes		['basophil']
607785	Juvenile Myelomonocytic Leukemia	165360	CBL	Cbl	1	1			1	1	Yes	['nampt neutrophil', 'neutrophil']
607785	Juvenile Myelomonocytic Leukemia	613113	NF1	Nf1	1	1			1	1	Yes	['nampt neutrophil', 'neutrophil']
607847	Neutropenia, Nonimmune Chronic Idiopathic, Of Adults	600871	GFI1	Gfi1	1	1			1	1	Yes		['myelocyte']
607906	Congenital Disorder Of Glycosylation, Type Ii	607905	ALG2	Alg2	1	1	PS212065	Congenital disorders of glycosylation, type I	1	1	NA	['myeloid progenitor']	['neutrophilic myeloblast']
607944	Spondyloenchondrodysplasia With Immune Dysregulation	171640	ACP5		1	1	PS184255	Spondylometaphyseal dysplasia	1	0		['memory b cell']
608013	Gaucher Disease, Perinatal Lethal	606463	GBA	Gba	1	1			1	1	Yes
608068	Neutrophilic Dermatosis, Acute Febrile	608107	MEFV	Mefv	1	1			1	1	Yes		['promyelocyte', 'neutrophilic myeloblast']
608093	Congenital Disorder Of Glycosylation, Type Ij	191350	DPAGT1	Dpagt1	1	1	PS212065	Congenital disorders of glycosylation, type I	1	1	NA	['myeloid progenitor']	['neutrophilic myeloblast']
608104	Congenital Disorder Of Glycosylation, Type Ih	608103	ALG8	Alg8	1	1	PS212065	Congenital disorders of glycosylation, type I	1	1	Yes	['myeloid progenitor']	['neutrophilic myeloblast']
608203	Immunodeficiency 73a With Defective Neutrophil Chemotaxix And Leukocytosis	602049	RAC2	Rac2	1	1	PS300755	Immunodeficiency (Select Examples)	1	1	Yes
608233	Hermansky-pudlak Syndrome 2	603401	AP3B1	Ap3b1	1	1	PS203300	Hermansky-Pudlak syndrome	1	1	Yes	['nk cell']	['macrophage', 'monocyte']
608404	Platelet Glycoprotein Iv Deficiency	173510	CD36	Cd36	1	1	PS231200	Bleeding disorder, platelet-type	1	1	Yes
608799	Congenital Disorder Of Glycosylation, Type Ie	603503	DPM1	Dpm1	1	1	PS212065	Congenital disorders of glycosylation, type I	1	1	No	['myeloid progenitor']	['neutrophilic myeloblast']
608836	Carnitine Palmitoyltransferase Ii Deficiency, Lethal Neonatal	600650	CPT2	Cpt2	1	1			1	1	NA
608885	Stomatin-deficient Cryohydrocytosis With Neurologic Defects	138140	SLC2A1	Slc2a1	1	1			1	0		['erythrocyte']
608898	Hemophagocytic Lymphohistiocytosis, Familial, 3	608897	UNC13D	Unc13d	1	1	PS267700	Hemophagocytic lymphohistiocytosis, familial	1	1	Yes	['nampt neutrophil', 'neutrophil']	['basophil']
608957	Cd8 Deficiency, Familial	186910	CD8A	Cd8a	1	1			1	1	Yes	['cd8-positive, alpha-beta t cell']	['T cell']
608971	Severe Combined Immunodeficiency, Autosomal Recessive, T Cell-negative,b Cell-positive, Nk Cell-positive	151460	PTPRC	Ptprc	1	1			1	1	Yes	['cd4-positive, alpha-beta t cell']
608971	Severe Combined Immunodeficiency, Autosomal Recessive, T Cell-negative,b Cell-positive, Nk Cell-positive	146661	IL7R	Il7r	1	1			1	1	Yes	['cd4-positive, alpha-beta t cell']
609053	Fanconi Anemia, Complementation Group I	611360	FANCI	Fanci	1	1	PS227650	Fanconi anemia	1	0	Yes	['erythroid progenitor', 'granulocyte', 'myeloid progenitor']	['precursor B cell', 'immature B cell']
609054	Fanconi Anemia, Complementation Group J	605882	BRIP1	Brip1	1	1	PS227650	Fanconi anemia	1	1	Yes	['erythroid progenitor', 'granulocyte', 'myeloid progenitor']	['precursor B cell', 'immature B cell']
609057	Nephropathy With Pretibial Epidermolysis Bullosa And Deafness	602243	CD151	Cd151	1	1			1	1	No
609069	Pancreatic And Cerebellar Agenesis	607194	PTF1A	Ptf1a	1	1			0	0
609135	Aplastic Anemia	607444	SBDS	Sbds	1	1			1	1	Yes	['cd8-positive, alpha-beta t cell', 'nk cell']
609135	Aplastic Anemia	602667	NBN	Nbn	1	1			1	1	Yes	['cd8-positive, alpha-beta t cell', 'nk cell']
609135	Aplastic Anemia	170280	PRF1	Prf1	1	1			1	0	Yes	['cd8-positive, alpha-beta t cell', 'nk cell']
609135	Aplastic Anemia	147570	IFNG	Ifng	1	1			1	1	Yes	['cd8-positive, alpha-beta t cell', 'nk cell']
609180	Congenital Disorder Of Glycosylation, Type If	604041	MPDU1	Mpdu1	1	1	PS212065	Congenital disorders of glycosylation, type I	1	1	No	['myeloid progenitor']	['neutrophilic myeloblast']
609529	Immunoglobulin A Deficiency 2	604907	TNFRSF13B	Tnfrsf13b	1	1			1	1	Yes	['memory b cell']
609628	Majeed Syndrome	605519	LPIN2	Lpin2	1	1			1	1	Yes	['erythrocyte']	['erythroblast']
609820	Erythrocytosis, Familial, 3	606425	EGLN1	Egln1	1	1	PS133100	Erythrocytosis, familial	1	1	Yes
609821	Bleeding Disorder Due To P2ry12 Defect	600515	P2RY12	P2ry12	1	1	PS231200	Bleeding disorder, platelet-type	0	1	Yes
609942	Noonan Syndrome 3	190070	KRAS	Kras	1	1	PS163950	Noonan syndrome	1	1	Yes
609981	Natural Killer Cell And Glucocorticoid Deficiency With Dna Repairdefect	602638	MCM4	Mcm4	1	1	PS300755	Immunodeficiency (Select Examples)	1	1	Yes
610090	Pyridoxamine 5-prime-phosphate Oxidase Deficiency	603287	PNPO	Pnpo	1	1			1	1	Yes	['myeloid progenitor']	['reticulocyte']
610163	Immunodeficiency 25	186780	CD247	Cd247	1	1	PS300755	Immunodeficiency (Select Examples)	1	1	Yes
610181	Aicardi-goutieres Syndrome 2	610326	RNASEH2B	Rnaseh2b	1	1	PS225750	Aicardi-Goutieres syndrome	1	1	Yes		['proerythroblast', 'monocyte']
610198	3-@methylglutaconic Aciduria, Type V	608977	DNAJC19	Dnajc19-ps	1	1	PS250950	3-Methylglutaconic aciduria	1	0	Yes
610198	3-@methylglutaconic Aciduria, Type V	608977	DNAJC19	Dnajc19	1	1	PS250950	3-Methylglutaconic aciduria	1	1	Yes
610293	Glycosylphosphatidylinositol Deficiency	610273	PIGM	Pigm	1	1			1	1	Yes
610329	Aicardi-goutieres Syndrome 3	610330	RNASEH2C	Rnaseh2c	1	1	PS225750	Aicardi-Goutieres syndrome	1	1	Yes		['proerythroblast', 'monocyte']
610333	Aicardi-goutieres Syndrome 4	606034	RNASEH2A	Rnaseh2a	1	1	PS225750	Aicardi-Goutieres syndrome	1	1	Yes		['proerythroblast', 'monocyte']
610377	Mevalonic Aciduria	251170	MVK	Mvk	1	1			0	1	Yes
610460	Thiopurine S-methyltransferase Deficiency	187680	TPMT	Tpmt	1	1	PS610460	Thiopurines, poor metabolism of	1	0
610475	Pigmented Nodular Adrenocortical Disease, Primary, 2	604961	PDE11A	Pde11a	1	1	PS610489	Pigmented nodular adrenocortical disease, primary	0	0
610489	Pigmented Nodular Adrenocortical Disease, Primary, 1	188830	PRKAR1A	Prkar1a	1	1	PS610489	Pigmented nodular adrenocortical disease, primary	1	1	No
610539	Gaucher Disease, Atypical	176801	PSAP	Psap	1	1			1	1	Yes
610582	Diabetes Mellitus, Transient Neonatal, 3	600937	KCNJ11	Kcnj11	1	1			0	0
610629	Diamond-blackfan Anemia 3	602412	RPS24	Rps24	1	1	PS105650	Diamond-Blackfan anemia	1	1	Yes	['cd4-positive, alpha-beta t cell', 'hematopoietic stem cell']	['hematopoietic stem cell', 'T cell', 'mature B cell']
610733	Noonan Syndrome 4	182530	SOS1	Sos1	1	1	PS163950	Noonan syndrome	1	0
610738	Neutropenia, Severe Congenital, Autosomal Recessive 3	605998	HAX1	Hax1	1	1	PS202700	Neutropenia, severe congenital	1	1	Yes
610798	Immunodeficiency Due To Defect In Mapbp-interacting Protein	610389	LAMTOR2	Lamtor2	1	1			1	1	Yes
610832	Fanconi Anemia, Complementation Group N	610355	PALB2	Palb2	1	1	PS227650	Fanconi anemia	1	0	Yes	['erythroid progenitor', 'granulocyte', 'myeloid progenitor']	['precursor B cell', 'immature B cell']
610842	Pseudoxanthoma Elasticum-like Disorder With Multiple Coagulation Factor Deficiency	137167	GGCX	Ggcx	1	1			1	0
611126	Acyl-coa Dehydrogenase Family, Member 9, Deficiency Of	611103	ACAD9	Acad9	1	1	PS252010	Mitochondrial complex I deficiency, nuclear type	1	1	NA
611174	Hamamy Syndrome	606195	IRX5		1	1			0	0
611209	Congenital Disorder Of Glycosylation, Type Iig	606973	COG1	Cog1	1	1	PS212066	Congenital disorders of glycosylation, type II	1	1	NA
611283	Isobutyryl-coa Dehydrogenase Deficiency	604773	ACAD8	Acad8	1	1			1	1	NA
611490	Osteopetrosis, Autosomal Recessive 4	602727	CLCN7	Clcn7	1	1	PS259700	Osteopetrosis, autosomal recessive	1	0	Yes
611590	Renal Tubular Acidosis, Distal, With Hemolytic Anemia	109270	SLC4A1	Slc4a1	1	1	PS179800	Distal renal tubular acidosis	1	1	Yes	['erythrocyte']
611762	Familial Cold Autoinflammatory Syndrome 2	609648	NLRP12	Nlrp12	1	1	PS120100	Familial cold autoinflammatory syndrome	1	0
611773	Angiopathy, Hereditary, With Nephropathy, Aneurysms, And Muscle Cramps	120130	COL4A1	Col4a1	1	1			0	0
611783	Erythrocytosis, Familial, 4	603349	EPAS1	Epas1	1	1	PS133100	Erythrocytosis, familial	0	0	Yes
611804	Elliptocytosis 1	130500	EPB41	Epb41	1	1			1	0		['erythrocyte']
611881	Glycogen Storage Disease Xii	103850	ALDOA	Aldoa	1	1			1	1	Yes	['macrophage']
612004	Thrombocytopenia 4	123970	CYCS	Cycs	1	1	PS313900	Thrombocytopenia	1	1	Yes
612015	Congenital Disorder Of Glycosylation, Type In	611908	RFT1	Rft1	1	1	PS212065	Congenital disorders of glycosylation, type I	1	1	No	['myeloid progenitor']	['neutrophilic myeloblast']
612126	Glut1 Deficiency Syndrome 2	138140	SLC2A1	Slc2a1	1	1	PS128100	Dystonia	1	0		['erythrocyte']
612126	Glut1 Deficiency Syndrome 2	138140	SLC2A1	Slc2a1	1	1	PS606777	Glut1 deficiency syndrome	1	0		['erythrocyte']
612199	Cerebroretinal Microangiopathy With Calcifications And Cysts	613129	CTC1	Ctc1	1	1	PS612199	Cerebroretinal microangiopathy with calcfications and cysts	1	0		['cd4-positive, alpha-beta t cell', 'cd8-positive, alpha-beta t cell']
612260	Immunodeficiency 68	602170	MYD88	Myd88	1	1	PS300755	Immunodeficiency (Select Examples)	1	1	Yes
612300	Hemolytic Anemia, Cd59-mediated, With Or Without Immune-mediated Polyneuropathy	107271	CD59	Cd59b	1	1			1	1	Yes		['proerythroblast']
612301	Osteopetrosis, Autosomal Recessive 7	603499	TNFRSF11A	Tnfrsf11a	1	1	PS259700	Osteopetrosis, autosomal recessive	0	0	Yes
612304	Thrombophilia, Hereditary, Due To Protein C Deficiency, Autosomal	612283	PROC	Proc	1	1	PS188050	Thrombophilia	0	0	Yes		['monocyte', 'promyelocyte', 'neutrophilic myeloblast']
612336	Thrombophilia, Hereditary, Due To Protein S Deficiency, Autosomal	176880	PROS1	Pros1	1	1	PS188050	Thrombophilia	1	1	Yes		['monocyte', 'promyelocyte', 'neutrophilic myeloblast']
612350	Ehlers-danlos Syndrome, Spondylodysplastic Type, 3	608735	SLC39A13	Slc39a13	1	1	PS130000	Ehlers-Danlos syndrome	0	0
612356	Heparin Cofactor Ii Deficiency	142360	SERPIND1	Serpind1	1	1	PS188050	Thrombophilia	0	0	Yes		['monocyte', 'promyelocyte', 'neutrophilic myeloblast']
612379	Coloboma, Ocular, And Ichthyosis, Brain Malformations, And Endocrine	611715	SRD5A3	Srd5a3	1	1	PS212065	Congenital disorders of glycosylation, type I	1	1	Yes	['myeloid progenitor']	['neutrophilic myeloblast']
612394	Bone Fragility With Contractures, Arterial Rupture, And Deafness	603066	PLOD3	Plod3	1	1			1	1	No
612416	Factor Xi Deficiency	264900	F11	F11	1	1			0	0
612423	Prekallikrein Deficiency	229000	KLKB1	Klkb1	1	1			0	0
612527	Diamond-blackfan Anemia 4	180472	RPS17	Rps17	1	1	PS105650	Diamond-Blackfan anemia	1	1	Yes	['cd4-positive, alpha-beta t cell', 'hematopoietic stem cell']	['hematopoietic stem cell', 'T cell', 'mature B cell']
612528	Diamond-blackfan Anemia 5	180468	RPL35A	Rpl35a	1	1	PS105650	Diamond-Blackfan anemia	1	1	Yes	['cd4-positive, alpha-beta t cell', 'hematopoietic stem cell']	['hematopoietic stem cell', 'T cell', 'mature B cell']
612541	Neutropenia, Severe Congenital, 4, Autosomal Recessive	611045	G6PC3	G6pc3	1	1	PS202700	Neutropenia, severe congenital	1	1	Yes
612561	Diamond-blackfan Anemia 6	603634	RPL5	Rpl5	1	1	PS105650	Diamond-Blackfan anemia	1	1	Yes	['cd4-positive, alpha-beta t cell', 'hematopoietic stem cell']	['hematopoietic stem cell', 'T cell', 'mature B cell']
612562	Diamond-blackfan Anemia 7	604175	RPL11	Rpl11	1	1	PS105650	Diamond-Blackfan anemia	1	1	Yes	['cd4-positive, alpha-beta t cell', 'hematopoietic stem cell']	['hematopoietic stem cell', 'T cell', 'mature B cell']
612563	Diamond-blackfan Anemia 8	603658	RPS7	Rps7	1	1	PS105650	Diamond-Blackfan anemia	1	1	Yes	['cd4-positive, alpha-beta t cell', 'hematopoietic stem cell']	['hematopoietic stem cell', 'T cell', 'mature B cell']
612631	Adenylate Kinase Deficiency, Hemolytic Anemia Due To	103000	AK1	Ak1	1	1			1	0		['erythroid progenitor']
612653	Spherocytosis, Type 4	109270	SLC4A1	Slc4a1	1	1			1	1	Yes	['erythrocyte']
612690	Spherocytosis, Type 5	177070	EPB42	Epb42	1	1			1	0
612714	Exocrine Pancreatic Insufficiency, Dyserythropoietic Anemia, And Calvarial	607976	COX4I2	Cox4i2	1	1			0	0
612740	Porphyria, Acute Hepatic	125270	ALAD	Alad	1	1			1	1	Yes	['erythroid progenitor']	['proerythroblast']
612783	Immunodeficiency 10	605921	STIM1	Stim1	1	1	PS300755	Immunodeficiency (Select Examples)	1	1	Yes
612840	Leukocyte Adhesion Deficiency, Type Iii	607901	FERMT3	Fermt3	1	1			1	1	Yes
612852	Interleukin 1 Receptor Antagonist Deficiency	147679	IL1RN	Il1rn	1	1			1	1	NA
612922	Hemolytic Uremic Syndrome, Atypical, Susceptibility To, 2	120920	CD46	Cd46	1	1	PS235400	Hemolytic uremic syndrome	1	0	Yes
612923	Hemolytic Uremic Syndrome, Atypical, Susceptibility To, 3	217030	CFI	Cfi	1	1	PS235400	Hemolytic uremic syndrome	0	0	Yes
612924	Hemolytic Uremic Syndrome, Atypical, Susceptibility To, 4	138470	CFB	Cfb	1	1	PS235400	Hemolytic uremic syndrome	0	0	Yes
612925	Hemolytic Uremic Syndrome, Atypical, Susceptibility To, 5	120700	C3	C3	1	1	PS235400	Hemolytic uremic syndrome	0	1	Yes
612926	Hemolytic Uremic Syndrome, Atypical, Susceptibility To, 6	188040	THBD	Thbd	1	1	PS235400	Hemolytic uremic syndrome	0	1	Yes
612952	Aicardi-goutieres Syndrome 5	606754	SAMHD1	Samhd1	1	1	PS225750	Aicardi-Goutieres syndrome	1	1	Yes		['proerythroblast', 'monocyte']
613011	Lymphoproliferative Syndrome 1	186973	ITK	Itk	1	1	PS308240	Lymphoproliferative syndrome	1	1	Yes	['cd8-positive, alpha-beta t cell']	['T cell']
613065	Leukemia, Acute Lymphocytic, Susceptibility To, 1	602667	NBN	Nbn	1	1			1	1	Yes
613070	Liver Failure, Acute Infantile	610230	TRMU	Trmu	1	1			1	0
613075	Macrocephaly, Alopecia, Cutis Laxa, And Scoliosis	610222	RIN2	Rin2	1	1			1	1	No
613092	Hyperuricemic Nephropathy, Familial Juvenile, 2	179820	REN	Ren1	1	1	PS162000	Tubulointerstitial kidney disease	0	0
613101	Hemophagocytic Lymphohistiocytosis, Familial, 5	601717	STXBP2	Stxbp2	1	1	PS267700	Hemophagocytic lymphohistiocytosis, familial	1	1	Yes	['nampt neutrophil', 'neutrophil']	['basophil']
613107	Neutropenia, Severe Congenital, 2, Autosomal Dominant	600871	GFI1	Gfi1	1	1	PS202700	Neutropenia, severe congenital	1	1	Yes
613112	Macrothrombocytopenia, Autosomal Dominant, Tubb1-related	612901	TUBB1	Tubb1	1	1			1	0
613116	Thrombophilia Due To Histidine-rich Glycoprotein Deficiency	142640	HRG		1	1	PS188050	Thrombophilia	0	0	Yes		['monocyte', 'promyelocyte', 'neutrophilic myeloblast']
613118	Antithrombin Iii Deficiency	107300	SERPINC1	Serpinc1	1	1	PS188050	Thrombophilia	0	0	Yes		['monocyte', 'promyelocyte', 'neutrophilic myeloblast']
613148	Inflammatory Bowel Disease 28, Early Onset, Autosomal Recessive	146933	IL10RA	Il10ra	1	1	PS266600	Inflammatory bowel disease	1	1	Yes
613179	Immunodeficiency Due To Purine Nucleoside Phosphorylase Deficiency	164050	PNP	Pnp	1	1			1	1	Yes		['proerythroblast', 'erythroblast']
613179	Immunodeficiency Due To Purine Nucleoside Phosphorylase Deficiency	164050	PNP	Pnp2	1	1			1	1	Yes		['proerythroblast', 'erythroblast']
613224	Noonan Syndrome 6	164790	NRAS	Nras	1	1	PS163950	Noonan syndrome	1	1	Yes
613225	Factor Xiii, A Subunit, Deficiency Of	134570	F13A1	F13a1	1	1			1	1	No
613235	Factor Xiii, B Subunit, Deficiency Of	134580	F13B	F13b	1	1			0	0
613280	Hypermanganesemia With Dystonia, Polycythemia, And Cirrhosis	611146	SLC30A10	Slc30a10	1	1	PS613280	Hypermanganesemia with dystonia	0	0
613308	Diamond-blackfan Anemia 9	603632	RPS10	Rps10	1	1	PS105650	Diamond-Blackfan anemia	1	1	Yes	['cd4-positive, alpha-beta t cell', 'hematopoietic stem cell']	['hematopoietic stem cell', 'T cell', 'mature B cell']
613309	Diamond-blackfan Anemia 10	603701	RPS26	Rps26	1	1	PS105650	Diamond-Blackfan anemia	1	1	Yes	['cd4-positive, alpha-beta t cell', 'hematopoietic stem cell']	['hematopoietic stem cell', 'T cell', 'mature B cell']
613313	Hemochromatosis, Type 2b	606464	HAMP		1	1	PS235200	Hemochromatosis	0	0		['erythrocyte']
613329	Plasminogen Activator Inhibitor-1 Deficiency	173360	SERPINE1	Serpine1	1	1			0	0
613385	Autoimmune Disease, Multisystem, With Facial Dysmorphism	606409	ITCH	Itch	1	1			1	1	NA
613470	Hemolytic Anemia, Nonspherocytic, Due To Glucose Phosphate Isomerase	172400	GPI	Gpi1	1	1			1	1	Yes
613471	Reynolds Syndrome	600024	LBR	Lbr	1	1			1	1	NA
613496	Immunodeficiency, Common Variable, 6	186845	CD81	Cd81	1	1	PS607594	Immunodeficiency, common variable	1	1	Yes	['cd8-positive, alpha-beta t cell']	['macrophage']
613501	Agammaglobulinemia 3, Autosomal Recessive	112205	CD79A	Cd79a	1	1	PS601495	Agammaglobulinemia	1	1	Yes	['memory b cell', 'naive b cell']	['early pro-B cell']
613502	Agammaglobulinemia 4, Autosomal Recessive	604515	BLNK	Blnk	1	1	PS601495	Agammaglobulinemia	1	1	Yes	['memory b cell', 'naive b cell']	['early pro-B cell']
613550	Nephronophthisis 11	609884	TMEM67	Tmem67	1	1	PS256100	Nephronophthisis	1	0
613554	Von Willebrand Disease, Type 2	613160	VWF	Vwf	1	1			1	0		['myeloid progenitor']
613561	Myopathy, Lactic Acidosis, And Sideroblastic Anemia 2	610957	YARS2	Yars2	1	1	PS600462	Myopathy, lactic acidosis, and sideroblastic anemia	1	1	Yes
613563	Noonan Syndrome-like Disorder With Or Without Juvenile Myelomonocyticleukemia	165360	CBL	Cbl	1	1			1	1	Yes
613625	Factor V And Factor Viii, Combined Deficiency Of	607788	MCFD2	Mcfd2	1	1			1	1	No
613658	Rajab Interstitial Lung Disease With Brain Calcifications	609690	FARSB	Farsb	1	1	PS613658	Rajab interstitial lung disease with brain calcifications	1	1	Yes	['erythroid progenitor']
613673	Anemia, Dyserythropoietic Congenital, Type Iv	600599	KLF1	Klf1	1	1	PS224120	Anemia, congenital dyserythropoietic	1	1	Yes
613679	Congenital Prothrombin Deficiency	176930	F2	F2	1	1			0	0
613759	Infections, Recurrent, With Encephalopathy, Hepatic Dysfunction, And Cardiovascular Malformations	602457	FADD	Fadd	1	1			1	1	Yes
613795	Loeys-dietz Syndrome, Type 3	603109	SMAD3	Smad3	1	1	PS609192	Loeys-Dietz syndrome	1	1	No
613812	Bile Acid Synthesis Defect, Congenital, 3	603711	CYP7B1	Cyp7b1	1	1	PS607765	Bile acid synthesis defect, congenital	1	0	Yes		['basophil']
613839	Megaloblastic Anemia Due To Dihydrofolate Reductase Deficiency	126060	DHFR	Dhfr	1	1			1	1	Yes	['erythroid progenitor']	['precursor B cell']
613845	Hyperuricemia, Pulmonary Hypertension, Renal Failure, And Alkalosis	612804	SARS2	Sars2	1	1			1	1	Yes
613949	Okt4 Epitope Deficiency	186940	CD4	Cd4	1	1			1	1	Yes	['cd4-positive, alpha-beta t cell', 'monocyte']	['macrophage']
613951	Fanconi Anemia, Complementation Group P	613278	SLX4	Slx4	1	1	PS227650	Fanconi anemia	0	0	Yes	['erythroid progenitor', 'granulocyte', 'myeloid progenitor']	['precursor B cell', 'immature B cell']
613977	Cyanosis, Transient Neonatal	142250	HBG2	Hbb-y	1	1			0	0
613978	Hemoglobin H Disease	141850	HBA2	Hba-a1	1	1			1	1	Yes	['erythrocyte']	['reticulocyte', 'erythroblast']
613978	Hemoglobin H Disease	141850	HBA2	Hba-a2	1	1			1	1	Yes	['erythrocyte']	['reticulocyte', 'erythroblast']
613978	Hemoglobin H Disease	141800	HBA1	Hba-a1	1	1			1	1	Yes	['erythrocyte']	['reticulocyte', 'erythroblast']
613978	Hemoglobin H Disease	141800	HBA1	Hba-a2	1	1			1	1	Yes	['erythrocyte']	['reticulocyte', 'erythroblast']
613985	Beta-thalassemia	141900	HBB	Hbb-bt	1	1			1	0		['erythrocyte']
613985	Beta-thalassemia	141900	HBB	Hbb-bs	1	1			1	0		['erythrocyte']
613985	Beta-thalassemia	152424	LCRB		1	1			0	0		['erythrocyte']
613987	Dyskeratosis Congenita, Autosomal Recessive, 2	606470	NHP2	Nhp2	1	1	PS127550	Dyskeratosis congenita	1	1	Yes		['precursor B cell', 'myelocyte', 'hematopoietic stem cell']
613988	Dyskeratosis Congenita, Autosomal Recessive, 3	612661	WRAP53	Wrap53	1	1	PS127550	Dyskeratosis congenita	1	1	Yes		['precursor B cell', 'myelocyte', 'hematopoietic stem cell']
613989	Dyskeratosis Congenita, Autosomal Dominant, 2	187270	TERT	Tert	1	1	PS127550	Dyskeratosis congenita	0	0	Yes		['precursor B cell', 'myelocyte', 'hematopoietic stem cell']
613990	Dyskeratosis Congenita, Autosomal Dominant, 3	604319	TINF2	Tinf2	1	1	PS127550	Dyskeratosis congenita	1	1	Yes		['precursor B cell', 'myelocyte', 'hematopoietic stem cell']
614009	Bleeding Disorder, Platelet-type, 13, Susceptibility To	188070	TBXA2R	Tbxa2r	1	1	PS231200	Bleeding disorder, platelet-type	0	1	Yes
614034	Heme Oxygenase-1 Deficiency	141250	HMOX1	Hmox1	1	1			1	1	Yes		['reticulocyte', 'monocyte']
614038	Lymphedema, Primary, With Myelodysplasia	137295	GATA2	Gata2	1	1			1	1	Yes	['myeloid progenitor']	['basophil']
614072	Hermansky-pudlak Syndrome 3	606118	HPS3	Hps3	1	1	PS203300	Hermansky-Pudlak syndrome	1	1	Yes	['nk cell']	['macrophage', 'monocyte']
614073	Hermansky-pudlak Syndrome 4	606682	HPS4	Hps4	1	1	PS203300	Hermansky-Pudlak syndrome	1	0	Yes	['nk cell']	['macrophage', 'monocyte']
614074	Hermansky-pudlak Syndrome 5	607521	HPS5	Hps5	1	1	PS203300	Hermansky-Pudlak syndrome	1	1	Yes	['nk cell']	['macrophage', 'monocyte']
614075	Hermansky-pudlak Syndrome 6	607522	HPS6	Hps6	1	1	PS203300	Hermansky-Pudlak syndrome	1	0	Yes	['nk cell']	['macrophage', 'monocyte']
614076	Hermansky-pudlak Syndrome 7	607145	DTNBP1	Dtnbp1	1	1	PS203300	Hermansky-Pudlak syndrome	1	1	Yes	['nk cell']	['macrophage', 'monocyte']
614077	Hermansky-pudlak Syndrome 8	609762	BLOC1S3	Bloc1s3	1	1	PS203300	Hermansky-Pudlak syndrome	0	1	Yes	['nk cell']	['macrophage', 'monocyte']
614082	Fanconi Anemia, Complementation Group G	602956	FANCG	Fancg	1	1	PS227650	Fanconi anemia	1	1	Yes	['erythroid progenitor', 'granulocyte', 'myeloid progenitor']	['precursor B cell', 'immature B cell']
614083	Fanconi Anemia, Complementation Group L	608111	FANCL	Fancl	1	1	PS227650	Fanconi anemia	1	1	Yes	['erythroid progenitor', 'granulocyte', 'myeloid progenitor']	['precursor B cell', 'immature B cell']
614162	Immunodeficiency 31c	600555	STAT1	Stat1	1	1	PS114580	Familial candidiasis	1	1	Yes
614162	Immunodeficiency 31c	600555	STAT1	Stat1	1	1	PS300755	Immunodeficiency (Select Examples)	1	1	Yes
614171	Hermansky-pudlak Syndrome 9	604310	BLOC1S6	Bloc1s6	1	1	PS203300	Hermansky-Pudlak syndrome	1	0	Yes	['nk cell']	['macrophage', 'monocyte']
614172	Immunodeficiency 21	137295	GATA2	Gata2	1	1	PS300755	Immunodeficiency (Select Examples)	1	1	Yes
614201	Bleeding Disorder, Platelet-type, 11	605546	GP6	Gp6	1	1	PS231200	Bleeding disorder, platelet-type	0	0	Yes
614204	Psoriasis 14, Pustular	605507	IL36RN	Il36rn	1	1	PS177900	Psoriasis	0	0
614286	Myelodysplastic Syndrome	137295	GATA2	Gata2	1	1			1	1	Yes	['myeloid progenitor']	['basophil']
614378	Cranioectodermal Dysplasia 4	608151	WDR19	Wdr19	1	1	PS218330	Cranioectodermal dysplasia	0	0
614380	Complement Component 4a Deficiency	120810	C4A	C4b	1	1			0	0
614380	Complement Component 4a Deficiency	120810	C4A	C4a	1	1			0	0
614450	Hypothyroidism, Congenital, Nongoitrous, 6	190120	THRA	Thra	1	1	PS275200	Hypothyroidism, congenital, nongoitrous	1	1	Yes
614470	Ras-associated Autoimmune Lymphoproliferative Syndrome Type Iv, Somatic	190070	KRAS	Kras	1	1			1	1	Yes
614483	Porencephaly 2	120090	COL4A2	Col4a2	1	1	PS175780	Brain small vessel disease	0	0
614486	Thrombophilia Due To Thrombomodulin Defect	188040	THBD	Thbd	1	1	PS188050	Thrombophilia	0	1			['monocyte', 'promyelocyte', 'neutrophilic myeloblast']
614493	Wiskott-aldrich Syndrome 2	602357	WIPF1	Wipf1	1	1			1	1	Yes
614514	Thrombophilia Due To Protein S Deficiency, Autosomal Recessive	176880	PROS1	Pros1	1	1	PS188050	Thrombophilia	1	1	Yes		['monocyte', 'promyelocyte', 'neutrophilic myeloblast']
614521	Thrombocythemia 3	147796	JAK2	Jak2	1	1	PS187950	Thrombocythemia	1	1	Yes		['hematopoietic stem cell']
614557	Ehlers-danlos Syndrome With Progressive Kyphoscoliosis, Myopathy,and Hearing Loss	614505	FKBP14	Fkbp14	1	1	PS130000	Ehlers-Danlos syndrome	1	0
614576	Congenital Disorder Of Glycosylation, Type Iil	606977	COG6	Cog6	1	1	PS212066	Congenital disorders of glycosylation, type II	1	1	Yes
614675	Bone Marrow Failure, Familial	602122	SRP72	Srp72	1	1	PS614675	Bone marrow failure syndrome	1	1	Yes	['myeloid progenitor']
614700	Immunodeficiency, Common Variable, 8, With Autoimmunity	606453	LRBA	Lrba	1	1	PS607594	Immunodeficiency, common variable	1	1	Yes	['cd8-positive, alpha-beta t cell']	['macrophage']
614727	Congenital Disorder Of Glycosylation, Type Iik	614726	TMEM165	Tmem165	1	1	PS212066	Congenital disorders of glycosylation, type II	1	1	Yes
614739	3-@methylglutaconic Aciduria With Deafness, Encephalopathy, And Leigh-likesyndrome	614725	SERAC1	Serac1	1	1	PS250950	3-Methylglutaconic aciduria	0	0
614742	Pulmonary Fibrosis And/or Bone Marrow Failure, Telomere-related, 1	187270	TERT	Tert	1	1	PS614742	Pulmonary fibrosis and/or bone marrow failure, telomere-related	0	0
614743	Pulmonary Fibrosis And/or Bone Marrow Failure, Telomere-related, 2	602322	TERC		1	1	PS614742	Pulmonary fibrosis and/or bone marrow failure, telomere-related	0	0
614816	Loeys-dietz Syndrome, Type 4	190220	TGFB2	Tgfb2	1	1	PS609192	Loeys-Dietz syndrome	0	0
614857	Methylmalonic Aciduria And Homocystinuria, Cblj Type	603214	ABCD4	Abcd4	1	1			1	0	Yes
614868	T-cell Immunodeficiency, Recurrent Infections, And Autoimmunity Withor Without Cardiac Malformations	604965	STK4	Stk4	1	1			1	1	Yes
614900	Diamond-blackfan Anemia 11	603704	RPL26	Rpl26	1	1	PS105650	Diamond-Blackfan anemia	1	1	Yes	['cd4-positive, alpha-beta t cell', 'hematopoietic stem cell']	['hematopoietic stem cell', 'T cell', 'mature B cell']
614921	Congenital Disorder Of Glycosylation, Type It	171900	PGM1	Pgm1	1	1	PS212065	Congenital disorders of glycosylation, type I	1	1	No	['myeloid progenitor']	['neutrophilic myeloblast']
614946	Combined Oxidative Phosphorylation Deficiency 14	611592	FARS2	Fars2	1	1	PS609060	Combined oxidative phosphorylation deficiency	1	1	Yes	['erythroid progenitor', 'myeloid progenitor']
614979	Splenomegaly, Cytopenia, And Vision Loss	607347	ALPK1	Alpk1	1	1			1	0
615008	Nephrotic Syndrome, Type 7	601440	DGKE	Dgke	1	1	PS235400	Hemolytic uremic syndrome	1	0	Yes
615008	Nephrotic Syndrome, Type 7	601440	DGKE	Dgke	1	1	PS256300	Nephrotic syndrome	1	0	Yes
615010	Aicardi-goutieres Syndrome 6	146920	ADAR	Adar	1	1	PS225750	Aicardi-Goutieres syndrome	1	1	Yes		['proerythroblast', 'monocyte']
615085	Osteopetrosis, Autosomal Recessive 8	614780	SNX10	Snx10	1	1	PS259700	Osteopetrosis, autosomal recessive	1	1	Yes
615122	Lymphoproliferative Syndrome 2	186711	CD27	Cd27	1	1	PS308240	Lymphoproliferative syndrome	1	1	Yes	['cd8-positive, alpha-beta t cell']	['T cell']
615190	Dyskeratosis Congenita, Autosomal Recessive 5	608833	RTEL1	Rtel1	1	1	PS127550	Dyskeratosis congenita	0	0	Yes		['precursor B cell', 'myelocyte', 'hematopoietic stem cell']
615193	Bleeding Disorder, Platelet-type, 15	102575	ACTN1	Actn1	1	1	PS231200	Bleeding disorder, platelet-type	1	1	Yes
615214	Agammaglobulinemia 7, Autosomal Recessive	171833	PIK3R1	Pik3r1	1	1	PS601495	Agammaglobulinemia	1	1	Yes	['memory b cell', 'naive b cell']	['early pro-B cell']
615234	Anemia, Hypochromic Microcytic, With Iron Overload 2	609671	STEAP3	Steap3	1	1	PS206100	Anemia, hypochromic microcytic, with iron overload	1	1	Yes		['proerythroblast']
615272	Fanconi Anemia, Complementation Group Q	133520	ERCC4	Ercc4	1	1	PS227650	Fanconi anemia	1	0	Yes	['erythroid progenitor', 'granulocyte', 'myeloid progenitor']	['precursor B cell', 'immature B cell']
615285	Neutropenia, Severe Congenital, 5, Autosomal Recessive	610035	VPS45	Vps45	1	1	PS202700	Neutropenia, severe congenital	1	1	Yes
615368	Lethal Congenital Contracture Syndrome 5	602378	DNM2	Dnm2	1	1	PS253310	Lethal congenital contracture syndrome	1	1	No
615387	T-cell Receptor-alpha/beta Deficiency	186880	TRAC		1	1	PS300755	Immunodeficiency (Select Examples)	1	0
615399	Paroxysmal Nocturnal Hemoglobinuria 2	610272	PIGT	Pigt	1	1	PS300818	Paroxysmal nocturnal hemoglobinuria	1	1	Yes
615401	Immunodeficiency 8	605000	CORO1A	Coro1a	1	1	PS300755	Immunodeficiency (Select Examples)	1	1	Yes
615438	Infantile Liver Failure Syndrome 1	151350	LARS1	Lars	1	1	PS615438	Infantile liver failure syndrome	0	1
615471	Mitochondrial Dna Depletion Syndrome 13 (encephalomyopathic Type)	605654	FBXL4	Fbxl4	1	1	PS603041	Mitochondrial DNA depletion syndrome	1	0	Yes
615486	Interstitial Lung And Liver Disease	156560	MARS1	Mars1	1	1			0	0
615506	Telangiectasia, Hereditary Hemorrhagic, Type 5	605120	GDF2	Gdf2	1	1	PS187300	Telangiectasia, hereditary hemorrhagic	0	0		['erythroid progenitor']
615512	Triosephosphate Isomerase Deficiency	190450	TPI1	Tpi1	1	1			1	1	Yes
615513	Immunodeficiency 14	602839	PIK3CD	Pik3cd	1	1	PS300755	Immunodeficiency (Select Examples)	1	1	Yes
615518	Immunodeficiency 13	604011	UNC119	Unc119	1	1	PS300755	Immunodeficiency (Select Examples)	1	1	Yes
615550	Diamond-blackfan Anemia 12	604174	RPL15	Rpl15	1	1	PS105650	Diamond-Blackfan anemia	1	1	Yes	['cd4-positive, alpha-beta t cell', 'hematopoietic stem cell']	['hematopoietic stem cell', 'T cell', 'mature B cell']
615555	Hyperprolactinemia	176761	PRLR	Prlr	1	1			0	1	No
615558	Hypobetalipoproteinemia, Familial, 1	107730	APOB	Apob	1	1			0	0
615559	Autoimmune Lymphoproliferative Syndrome, Type Iii	176977	PRKCD	Prkcd	1	1			1	1	Yes
615578	Combined Oxidative Phosphorylation Deficiency 18	615564	SFXN4	Sfxn4	1	1	PS609060	Combined oxidative phosphorylation deficiency	1	0		['erythroid progenitor', 'myeloid progenitor']
615582	Loeys-dietz Syndrome 5	190230	TGFB3	Tgfb3	1	1	PS609192	Loeys-Dietz syndrome	0	0
615593	Immunodeficiency 16	600315	TNFRSF4	Tnfrsf4	1	1	PS300755	Immunodeficiency (Select Examples)	1	0	Yes
615597	Congenital Disorder Of Glycosylation, Type Ix	608605	STT3B	Stt3b	1	1	PS212065	Congenital disorders of glycosylation, type I	1	1	Yes	['myeloid progenitor']	['neutrophilic myeloblast']
615607	Immunodeficiency 17	186740	CD3G	Cd3g	1	1	PS300755	Immunodeficiency (Select Examples)	1	1	Yes
615615	Immunodeficiency 18	186830	CD3E	Cd3e	1	1	PS300755	Immunodeficiency (Select Examples)	1	1	Yes
615617	Immunodeficiency 19	186790	CD3D	Cd3d	1	1	PS300755	Immunodeficiency (Select Examples)	1	1	Yes
615631	Anemia, Congenital Dyserythropoietic, Type Ib	615626	CDIN1	Cdin1	1	1	PS224120	Anemia, congenital dyserythropoietic	0	0	Yes
615688	Vasculitis, Autoinflammation, Immunodeficiency, And Hematologic Defects Syndrome	607575	ADA2		1	1			1	0		['macrophage', 'monocyte']
615715	Bone Marrow Failure Syndrome 2	615667	ERCC6L2	Ercc6l2	1	1	PS614675	Bone marrow failure syndrome	1	0	Yes	['myeloid progenitor']
615758	Immunodeficiency 22	153390	LCK	Lck	1	1	PS300755	Immunodeficiency (Select Examples)	1	1	Yes
615789	Short Stature With Microcephaly And Distinctive Facies	604594	CRIPT	Cript	1	1			1	1	Yes
615816	Immunodeficiency 23	172100	PGM3	Pgm3	1	1	PS300755	Immunodeficiency (Select Examples)	1	1	Yes
615838	Mitochondrial Complex Iii Deficiency, Nuclear Type 8	615831	LYRM7	Lyrm7	1	1	PS124000	Mitochondrial complex III deficiency, nuclear type	1	0
615846	Aicardi-goutieres Syndrome 7	606951	IFIH1	Ifih1	1	1	PS225750	Aicardi-Goutieres syndrome	1	1	Yes		['proerythroblast', 'monocyte']
615888	Bleeding Disorder, Platelet-type, 18	605577	RASGRP2	Rasgrp2	1	1	PS231200	Bleeding disorder, platelet-type	1	1	Yes
615897	Immunodeficiency 24	123860	CTPS1	Ctps	1	1	PS300755	Immunodeficiency (Select Examples)	1	1	Yes
615909	Diamond-blackfan Anemia 13	603633	RPS29	Rps29	1	1	PS105650	Diamond-Blackfan anemia	1	1	Yes	['cd4-positive, alpha-beta t cell', 'hematopoietic stem cell']	['hematopoietic stem cell', 'T cell', 'mature B cell']
615934	Sting-associated Vasculopathy, Infantile-onset	612374	STING1	Sting1	1	1			0	0
615952	Autoimmune Disease, Multisystem, Infantile-onset, 1	102582	STAT3	Stat3	1	1	PS615952	Autoimmune disease, multisystem, infantile-onset	1	1	Yes		['T cell']
616005	Immunodeficiency 36	171833	PIK3R1	Pik3r1	1	1	PS300755	Immunodeficiency (Select Examples)	1	1	Yes
616022	Neutropenia, Severe Congenital, 6, Autosomal Recessive	616012	JAGN1	Jagn1	1	1	PS202700	Neutropenia, severe congenital	1	1	Yes
616028	Adams-oliver Syndrome 5	190198	NOTCH1	Notch1	1	1	PS100300	Adams-Oliver syndrome	1	1	No
616050	Autoinflammation With Infantile Enterocolitis	606831	NLRC4	Nlrc4	1	1			1	0
616084	Sideroblastic Anemia With B-cell Immunodeficiency, Periodic Fevers, And Developmental Delay	612907	TRNT1	Trnt1	1	1			1	1	Yes
616100	Autoimmune Lymphoproliferative Syndrome, Type V	123890	CTLA4	Ctla4	1	1			1	1	Yes	['cd4-positive, alpha-beta t cell']	['plasma cell']
616176	Bleeding Disorder, Platelet-type, 19	176893	PRKACG		1	1	PS231200	Bleeding disorder, platelet-type	0	0
616216	Thrombocytopenia 5	600618	ETV6	Etv6	1	1	PS313900	Thrombocytopenia	1	1	Yes
616271	3-@methylglutaconic Aciduria With Cataracts, Neurologic Involvement,and Neutropenia	616254	CLPB	Clpb	1	1	PS250950	3-Methylglutaconic aciduria	1	1	Yes
616278	Bile Acid Synthesis Defect, Congenital, 5	170995	ABCD3	Abcd3	1	1	PS607765	Bile acid synthesis defect, congenital	1	1	Yes		['basophil']
616414	Autoimmune Interstitial Lung, Joint, And Kidney Disease	601924	COPA	Copa	1	1			1	1	NA
616433	Immunodeficiency 40	603122	DOCK2	Dock2	1	1	PS300755	Immunodeficiency (Select Examples)	1	1	Yes
616435	Fanconi Anemia, Complementation Group T	610538	UBE2T	Ube2t	1	1	PS227650	Fanconi anemia	1	1	Yes	['erythroid progenitor', 'granulocyte', 'myeloid progenitor']	['precursor B cell', 'immature B cell']
616452	B-cell Expansion With Nfkb And T-cell Anergy	607210	CARD11	Card11	1	1			1	1	Yes
616457	Congenital Disorder Of Glycosylation, Type Iz	114010	CAD	Cad	1	1	PS308350	Developmental and epileptic encephalopathy	1	1	Yes
616483	Infantile Liver Failure Syndrome 2	608025	NBAS	Nbas	1	1	PS615438	Infantile liver failure syndrome	1	1	No
616507	Osteogenesis Imperfecta, Type Xvii	182120	SPARC	Sparc	1	1	PS166200	Osteogenesis imperfecta	1	0
616541	Short Stature, Microcephaly, And Endocrine Dysfunction	194363	XRCC4	Xrcc4	1	1			1	1	Yes
616553	Dyskeratosis Congenita, Autosomal Dominant 6	609377	ACD	Acd	1	1	PS127550	Dyskeratosis congenita	1	1	Yes		['precursor B cell', 'myelocyte', 'hematopoietic stem cell']
616568	Glioma Susceptibility 9	606478	POT1	Pot1a	1	1	PS137800	Glioma	1	1	No
616576	Immunodeficiency, Common Variable, 12	164011	NFKB1	Nfkb1	1	1	PS607594	Immunodeficiency, common variable	1	1	Yes	['cd8-positive, alpha-beta t cell']	['macrophage']
616577	Epilepsy, Hearing Loss, And Mental Retardation Syndrome	613940	SPATA5	Spata5	1	1			1	1	Yes
616638	Smith-kingsmore Syndrome	601231	MTOR	Mtor	1	1			1	1	Yes
616649	Spherocytosis, Type 2	182870	SPTB	Sptb	1	1			1	0
616651	Roifman Syndrome	601428	RNU4ATAC		1	1			0	0
616689	Dehydrated Hereditary Stomatocytosis 2	602754	KCNN4	Kcnn4	1	1			1	1	Yes
616737	Takenouchi-kosaki Syndrome	116952	CDC42		1	1			1	0
616738	Radioulnar Synostosis With Amegakaryocytic Thrombocytopenia 2	165215	MECOM	Mecom	1	1	PS605432	Radioulnar synostosis with amegakaryocytic thrombocytopenia	1	0		['hematopoietic stem cell']
616740	Immunodeficiency 46	190010	TFRC	Tfrc	1	1	PS300755	Immunodeficiency (Select Examples)	1	1	Yes
616744	Autoinflammatory Syndrome, Familial, Behcet-like	191163	TNFAIP3	Tnfaip3	1	1			1	1	NA
616843	Lymphedema, Hereditary, Iii	611184	PIEZO1	Piezo1	1	1	PS153100	Lymphatic malformation	1	0		['erythroid progenitor']
616860	Anemia, Sideroblastic, 3, Pyridoxine-refractory	609588	GLRX5	Glrx5	1	1	PS300751	Anemia, Sideroblastic	1	1	Yes	['erythrocyte']	['proerythroblast', 'erythroblast']
616871	Myeloproliferative/lymphoproliferative Neoplasms, Familial (multiple Types), Susceptibility To	608170	DDX41	Ddx41	1	1			1	1	Yes
616873	Immunodeficiency, Common Variable, 13	603023	IKZF1	Ikzf1	1	1	PS607594	Immunodeficiency, common variable	1	1	Yes	['cd8-positive, alpha-beta t cell']	['macrophage']
616913	Bleeding Disorder, Platelet-type, 20	614958	SLFN14	Slfn14	1	1	PS231200	Bleeding disorder, platelet-type	1	0	Yes
616914	Marfan Lipodystrophy Syndrome	134797	FBN1	Fbn1	1	1			1	0		['monocyte', 'myeloid progenitor']
616937	Thrombocytopenia 6	190090	SRC	Src	1	1	PS313900	Thrombocytopenia	0	0
616941	Agammaglobulinemia 8, Autosomal Dominant	147141	TCF3	Tcf3	1	1	PS601495	Agammaglobulinemia	1	1	Yes	['memory b cell', 'naive b cell']	['early pro-B cell']
616949	Spinocerebellar Ataxia, Autosomal Recessive 23	605764	TDP2	Tdp2	1	1	PS213200	Spinocerebellar ataxia, autosomal recessive	1	1	Yes	['nampt neutrophil']
616959	Retinitis Pigmentosa And Erythrocytic Microcytosis	612907	TRNT1	Trnt1	1	1			1	1	Yes
617006	Autoimmune Disease, Multisystem, Infantile-onset, 2	176947	ZAP70	Zap70	1	1	PS615952	Autoimmune disease, multisystem, infantile-onset	1	1	Yes		['T cell']
617014	Neutropenia, Severe Congenital, 7, Autosomal Recessive	138971	CSF3R	Csf3r	1	1	PS202700	Neutropenia, severe congenital	1	1	Yes
617021	Hydrops, Lactic Acidosis, And Sideroblastic Anemia	604544	LARS2	Lars2	1	1			0	1	Yes
617049	Cholestasis, Progressive Familial Intrahepatic, 5	603826	NR1H4	Nr1h4	1	1	PS211600	Cholestasis, progressive familial intrahepatic	0	0
617050	Hermansky-pudlak Syndrome 10	607246	AP3D1	Ap3d1	1	1	PS203300	Hermansky-Pudlak syndrome	1	1	Yes	['nk cell']	['macrophage', 'monocyte']
617052	Bone Marrow Failure Syndrome 3	617048	DNAJC21	Dnajc21	1	1	PS614675	Bone marrow failure syndrome	1	1	Yes	['myeloid progenitor']
617053	Mirage Syndrome	610456	SAMD9		1	1			1	0
617056	Hyperuricemic Nephropathy, Familial Juvenile, 4	609213	SEC61A1	Sec61a1	1	1	PS162000	Tubulointerstitial kidney disease	1	1	Yes
617099	Autoinflammation, Panniculitis, And Dermatosis Syndrome	615712	OTULIN	Otulin	1	1			1	0
617156	Mitochondrial Dna Depletion Syndrome 15 (hepatocerebral Type)	600438	TFAM	Tfam	1	1	PS603041	Mitochondrial DNA depletion syndrome	1	1	No
617174	Ehlers-danlos Syndrome, Periodontal Type, 2	120580	C1S	C1s2	1	1	PS130000	Ehlers-Danlos syndrome	0	0
617174	Ehlers-danlos Syndrome, Periodontal Type, 2	120580	C1S	C1s1	1	1	PS130000	Ehlers-Danlos syndrome	0	0
617237	Immunodeficiency 49	606558	BCL11B	Bcl11b	1	1	PS300755	Immunodeficiency (Select Examples)	1	1	Yes
617241	Lung Disease, Immunodeficiency, And Chromosome Breakage Syndrome	608243	NSMCE3	Nsmce3	1	1			1	0
617243	Fanconi Anemia, Complementation Group V	604094	MAD2L2	Mad2l2	1	1	PS227650	Fanconi anemia	1	1	Yes	['erythroid progenitor', 'granulocyte', 'myeloid progenitor']	['precursor B cell', 'immature B cell']
617248	3-methylglutaconic Aciduria, Type Viii	606441	HTRA2	Htra2	1	1	PS250950	3-Methylglutaconic aciduria	1	1	Yes
617253	Seckel Syndrome 10	617246	NSMCE2	Nsmce2	1	1	PS210600	Seckel syndrome	1	1	No
617300	Hydrops Fetalis, Nonimmune, And/or Atrial Septal Defect, Susceptibility To	600011	EPHB4	Ephb4	1	1	PS153100	Lymphatic malformation	1	0		['erythroid progenitor']
617303	Mucopolysaccharidosis-plus Syndrome	610034	VPS33A	Vps33a	1	1			1	1	Yes
617341	Cerebroretinal Microangiopathy With Calcifications And Cysts 2	613128	STN1	Stn1	1	1	PS612199	Cerebroretinal microangiopathy with calcfications and cysts	1	0		['cd4-positive, alpha-beta t cell', 'cd8-positive, alpha-beta t cell']
617388	Autoinflammation With Arthritis And Dyskeratosis	606636	NLRP1	Nlrp1b	1	1			1	0
617397	Pseudo-torch Syndrome 2	607057	USP18	Usp18	1	1	PS251290	Pseudo-TORCH syndrome	0	1	Yes		['macrophage']
617408	Diamond-blackfan Anemia 16	607526	RPL27	Rpl27	1	1	PS105650	Diamond-Blackfan anemia	1	1	Yes	['cd4-positive, alpha-beta t cell', 'hematopoietic stem cell']	['hematopoietic stem cell', 'T cell', 'mature B cell']
617409	Diamond-blackfan Anemia 17	603702	RPS27		1	1	PS105650	Diamond-Blackfan anemia	1	0	Yes	['cd4-positive, alpha-beta t cell', 'hematopoietic stem cell']	['hematopoietic stem cell', 'T cell', 'mature B cell']
617425	Immunoskeletal Dysplasia With Neurodevelopmental Abnormalities	605744	EXTL3	Extl3	1	1			1	1	Yes
617441	Thrombocytopenia, Anemia, And Myelofibrosis	606520	MPIG6B	Mpig6b	1	1			1	0		['myeloid progenitor']
617443	Bleeding Disorder, Platelet-type, 21	193067	FLI1	Fli1	1	1	PS231200	Bleeding disorder, platelet-type	1	1	Yes
617475	Specific Granule Deficiency 2	601736	SMARCD2	Smarcd2	1	1	PS245480	Specific granule deficiency	1	1	Yes	['cd24 neutrophil', 'granulocyte']	['neutrophilic metamyelocyte']
617514	Immunodeficiency 52	602354	LAT	Lat	1	1	PS300755	Immunodeficiency (Select Examples)	1	1	Yes
617575	Nephrotic Syndrome, Type 14	603729	SGPL1	Sgpl1	1	1	PS256300	Nephrotic syndrome	1	1	NA
617591	Proteasome-associated Autoinflammatory Syndrome 3	602177	PSMB4	Psmb4	1	1	PS256040	Proteosome-associated autoinflammatory syndrome	1	1	Yes		['plasma cell', 'macrophage', 'conventional dendritic cell', 'promyelocyte']
617591	Proteasome-associated Autoinflammatory Syndrome 3	177045	PSMB9	Psmb9	1	1	PS256040	Proteosome-associated autoinflammatory syndrome	1	1	Yes		['plasma cell', 'macrophage', 'conventional dendritic cell', 'promyelocyte']
617638	Immunodeficiency 11b With Atopic Dermatitis	607210	CARD11	Card11	1	1	PS300755	Immunodeficiency (Select Examples)	1	1	Yes
617718	Platelet Abnormalities With Eosinophilia And Immune-mediated Inflammatory Disease	604223	ARPC1B	Arpc1b	1	1	PS300755	Immunodeficiency (Select Examples)	1	1	Yes
617780	Combined Immunodeficiency And Megaloblastic Anemia With Or Without Hyperhomocysteinemia	172460	MTHFD1	Mthfd1	1	1			1	1	Yes
617784	Fanconi Anemia, Complementation Group W	614151	RFWD3	Rfwd3	1	1	PS227650	Fanconi anemia	1	1	Yes	['erythroid progenitor', 'granulocyte', 'myeloid progenitor']	['precursor B cell', 'immature B cell']
617821	Ehlers-danlos Syndrome, Arthrochalasia Type, 2	120160	COL1A2	Col1a2	1	1	PS130000	Ehlers-Danlos syndrome	0	0
617827	Immunodeficiency 55	610608	GINS1	Gins1	1	1	PS300755	Immunodeficiency (Select Examples)	1	1	Yes
617872	Combined Oxidative Phosphorylation Deficiency 34	611974	MRPS7	Mrps7	1	1	PS609060	Combined oxidative phosphorylation deficiency	1	1	Yes	['erythroid progenitor', 'myeloid progenitor']
617883	Fanconi Anemia, Complementation Group S	113705	BRCA1	Brca1	1	1	PS227650	Fanconi anemia	1	1	Yes	['erythroid progenitor', 'granulocyte', 'myeloid progenitor']	['precursor B cell', 'immature B cell']
617907	Erythrocytosis, Familial, 5	133170	EPO	Epo	1	1	PS133100	Erythrocytosis, familial	0	0	Yes
617911	Diamond-blackfan Anemia-like	133170	EPO	Epo	1	1			0	0
617941	Shwachman-diamond Syndrome 2	617538	EFL1	Efl1	1	1	PS260400	Schwachman-Diamond syndrome	1	0
617948	Elliptocytosis-3	182870	SPTB	Sptb	1	1			1	0
618000	Ehlers-danlos Syndrome, Classic-like, 2	602981	AEBP1	Aebp1	1	1	PS130000	Ehlers-Danlos syndrome	1	0
618005	Congenital Disorder Of Glycosylation With Defective Fucosylation 1	602589	FUT8	Fut8	1	1	PS618005	Congenital disorder of glycosylation with defective fucosylation	1	1	NA
618015	Protoporphyria, Erythropoietic, 2	615611	CLPX	Clpx	1	1	PS177000	Protoporphyria, erythropoietic	1	1	Yes	['erythrocyte']	['reticulocyte', 'erythroblast']
618048	Proteasome-associated Autoinflammatory Syndrome 2	613386	POMP	Pomp	1	1	PS256040	Proteosome-associated autoinflammatory syndrome	1	1	Yes		['plasma cell', 'macrophage', 'conventional dendritic cell', 'promyelocyte']
618067	Epileptic Encephalopathy, Early Infantile, 66	610423	PACS2	Pacs2	1	1	PS308350	Developmental and epileptic encephalopathy	1	1	NA
618092	Intellectual Developmental Disorder With Speech Delay, Dysmorphic Facies, And T-cell Abnormalities	606558	BCL11B	Bcl11b	1	1			1	1	Yes	['cd4-positive, alpha-beta t cell']	['T cell']
618107	Osteopetrosis, Autosomal Dominant 3	611466	PLEKHM1	Plekhm1	1	1	PS607634	Osteopetrosis, autosomal dominant	1	1	Yes		['segmented neutrophil of bone marrow']
618116	Bone Marrow Failure Syndrome 4	612176	MYSM1	Mysm1	1	1	PS614675	Bone marrow failure syndrome	1	1	Yes	['myeloid progenitor']
618150	Saul-wilson Syndrome	606976	COG4	Cog4	1	1			1	1	NA
618162	Spondyloepimetaphyseal Dysplasia, Krakow Type	614776	SIK3	Sik3	1	1			1	1	Yes
618165	Bone Marrow Failure Syndrome 5	191170	TP53	Trp53	1	1	PS614675	Bone marrow failure syndrome	1	1	Yes	['myeloid progenitor']
618183	Diarrhea 10, Protein-losing Enteropathy Type	607647	PLVAP	Plvap	1	1	PS214700	Diarrhea, congenital	0	0
618213	Inflammatory Bowel Disease, Immunodeficiency, And Encephalopathy	190180	TGFB1	Tgfb1	1	1			0	1
618223	Vertebral Anomalies And Variable Endocrine And T-cell Dysfunction	600747	TBX2	Tbx2	1	1			0	0
618261	Lymphoproliferative Syndrome 3	602840	CD70	Cd70	1	1	PS308240	Lymphoproliferative syndrome	1	0		['cd8-positive, alpha-beta t cell']	['T cell']
618278	Fibrosis, Neurodegeneration, And Cerebral Angiomatosis	618277	NHLRC2	Nhlrc2	1	1			1	1	Yes
618282	Hyper-ige Recurrent Infection Syndrome 3, Autosomal Recessive	618269	ZNF341	Zfp341	1	1	PS147060	Hyper-IgE recurrent infection syndrome	0	0		['cd24 neutrophil', 'nampt neutrophil', 'neutrophil']	['monocyte', 'conventional dendritic cell', 'neutrophilic myeloblast']
618307	Epidermodysplasia Verruciformis, Susceptibility To, 4	602037	RHOH	Rhoh	1	1	PS226400	Epidermodysplasia verruciformis, susceptibility to	1	1	NA	['myeloid progenitor']
618309	Epidermodysplasia Verruciformis, Susceptibility To, 5	146660	IL7	Il7	1	1	PS226400	Epidermodysplasia verruciformis, susceptibility to	1	0		['myeloid progenitor']
618310	Diamond-blackfan Anemia 18	604179	RPL18	Rpl18	1	1	PS105650	Diamond-Blackfan anemia	1	1	Yes	['cd4-positive, alpha-beta t cell', 'hematopoietic stem cell']	['hematopoietic stem cell', 'T cell', 'mature B cell']
618312	Diamond-blackfan Anemia 19	618315	RPL35	Rpl35	1	1	PS105650	Diamond-Blackfan anemia	1	1	Yes	['cd4-positive, alpha-beta t cell', 'hematopoietic stem cell']	['hematopoietic stem cell', 'T cell', 'mature B cell']
618313	Diamond-blackfan Anemia 20	603674	RPS15A	Rps15a	1	1	PS105650	Diamond-Blackfan anemia	1	1	Yes	['cd4-positive, alpha-beta t cell', 'hematopoietic stem cell']	['hematopoietic stem cell', 'T cell', 'mature B cell']
618321	Encephalopathy, Progressive, Early-onset, With Brain Edema And/or Leukoencephalopathy, 2	615910	NAXD	Naxd	1	1	PS617186	Encephalopathy, progressive, early-onset, with brain edema and/or leukoencephalopathy	0	0
618336	Intrauterine Growth Retardation, Metaphyseal Dysplasia, Adrenal Hypoplasia Congenita, Genital Anomalies, And Immunodeficiency	174762	POLE	Pole	1	1			1	1	Yes
618343	Polymicrogyria With Or Without Vascular-type Ehlers-danlos Syndrome	120180	COL3A1	Col3a1	1	1			0	0
618360	Brain Small Vessel Disease 3	617531	COLGALT1	Colgalt1	1	1	PS175780	Brain small vessel disease	1	0
618372	Gastrointestinal Ulceration, Recurrent, With Dysfunctional Platelets	600522	PLA2G4A	Pla2g4a	1	1			1	1	Yes
618394	Immunodeficiency 60	605394	BACH2	Bach2	1	1	PS300755	Immunodeficiency (Select Examples)	1	1	Yes
618398	T-cell Lymphoma, Subcutaneous Panniculitis-like	606652	HAVCR2	Havcr2	1	1			1	0		['nk cell']
618451	Neurodegeneration, Early-onset, With Choreoathetoid Movements And Microcytic Anemia	147582	IREB2	Ireb2	1	1			1	1	Yes
618459	Immunodeficiency 62	601855	ARHGEF1	Arhgef1	1	1	PS300755	Immunodeficiency (Select Examples)	1	1	Yes
618462	Bleeding Disorder, Platelet-type, 22	600997	EPHB2	Ephb2	1	1	PS231200	Bleeding disorder, platelet-type	0	0
618495	Immunodeficiency 63 With Lymphoproliferation And Autoimmunity	146710	IL2RB	Il2rb	1	1	PS300755	Immunodeficiency (Select Examples)	1	1	Yes
618523	Hyper-ige Recurrent Infection Syndrome 4, Autosomal Recessive	600694	IL6ST	Il6st	1	1	PS147060	Hyper-IgE recurrent infection syndrome	1	1	Yes	['cd24 neutrophil', 'nampt neutrophil', 'neutrophil']	['monocyte', 'conventional dendritic cell', 'neutrophilic myeloblast']
618534	Immunodeficiency 64	603962	RASGRP1	Rasgrp1	1	1	PS300755	Immunodeficiency (Select Examples)	1	1	Yes
618549	Hepatitis, Fulminant Viral, Susceptibility To	604113	IL18BP	Il18bp	1	1			1	1	NA
618620	Abdominal Obesity-metabolic Syndrome 4	609443	CELA2A	Cela2a	1	1	PS605552	Abdominal obesity-metabolic syndrome	0	0
618624	Noonan Syndrome 12	600098	RRAS2	Rras2	1	1	PS163950	Noonan syndrome	1	1	Yes
618641	Infantile Liver Failure Syndrome 3	610089	RINT1	Rint1	1	1	PS615438	Infantile liver failure syndrome	1	1	No
618660	Hemolytic Anemia Due To Glutathione Reductase Deficiency	138300	GSR	Gsr	1	1			1	1	Yes
618674	Pulmonary Fibrosis And/or Bone Marrow Failure, Telomere-related, 5	616381	ZCCHC8	Zcchc8	1	1	PS614742	Pulmonary fibrosis and/or bone marrow failure, telomere-related	1	1	Yes
618752	Neutropenia, Severe Congenital, 8, Autosomal Dominant	604857	SRP54	Srp54a	1	1	PS202700	Neutropenia, severe congenital	1	1	Yes
618752	Neutropenia, Severe Congenital, 8, Autosomal Dominant	604857	SRP54	Srp54b	1	1	PS202700	Neutropenia, severe congenital	1	1	Yes
618775	Mitochondrial Complex Iii Deficiency, Nuclear Type 10	191327	UQCRFS1	Uqcrfs1	1	1	PS124000	Mitochondrial complex III deficiency, nuclear type	1	1	Yes
618795	Juvenile Arthritis	613409	LACC1	Lacc1	1	1			1	0
618805	Triokinase And Fmn Cyclase Deficiency Syndrome	615844	TKFC	Tkfc	1	1			1	0
618806	T-cell Lymphopenia, Infantile, With Or Without Nail Dystrophy, Autosomal Dominant	600838	FOXN1	Foxn1	1	1			0	0
618811	Mitochondrial Dna Depletion Syndrome 18	607571	SLC25A21	Slc25a21	1	1	PS603041	Mitochondrial DNA depletion syndrome	1	1	No
618835	Combined Oxidative Phosphorylation Deficiency 40	617209	QRSL1	Qrsl1	1	1	PS609060	Combined oxidative phosphorylation deficiency	1	1	Yes	['erythroid progenitor', 'myeloid progenitor']
618838	Combined Oxidative Phosphorylation Deficiency 41	603645	GATB	Gatb	1	1	PS609060	Combined oxidative phosphorylation deficiency	1	0		['erythroid progenitor', 'myeloid progenitor']
618839	Combined Oxidative Phosphorylation Deficiency 42	617210	GATC	Gatc	1	1	PS609060	Combined oxidative phosphorylation deficiency	1	1	Yes	['erythroid progenitor', 'myeloid progenitor']
618849	Bone Marrow Failure Syndrome 6	602704	MDM4	Mdm4	1	1	PS614675	Bone marrow failure syndrome	1	1	Yes	['myeloid progenitor']
618852	Autoinflammation With Episodic Fever And Lymphadenopathy	603453	RIPK1	Ripk1	1	1			1	1	Yes
618858	Diabetes Mellitus, Permanent Neonatal 4	176730	INS	Ins2	1	1	PS606176	Diabetes mellitus, permanent neonatal	0	0
618882	Imerslund-grasbeck Syndrome 2	605799	AMN	Amn	1	1	PS261100	Imerslund-Grasbeck syndrome	0	0
618885	Congenital Disorder Of Glycosylation, Type Iit	602274	GALNT2	Galnt2	1	1	PS212066	Congenital disorders of glycosylation, type II	1	1	No
618886	Pseudo-torch Syndrome 3	600556	STAT2	Stat2	1	1	PS251290	Pseudo-TORCH syndrome	1	1	Yes		['macrophage']
618892	Harderoporphyria	612732	CPOX	Cpox	1	1			1	1	Yes		['proerythroblast']
618935	Chronic Granulomatous Disease 5, Autosomal Recessive	618334	CYBC1	Cybc1	1	1	PS306400	Granulomatous disease, chronic	1	0		['nampt neutrophil', 'neutrophil']	['monocyte', 'neutrophilic metamyelocyte', 'band form neutrophil', 'segmented neutrophil of bone marrow']
618944	Hyper-ige Recurrent Infection Syndrome 5, Autosomal Recessive	147880	IL6R	Il6ra	1	1	PS147060	Hyper-IgE recurrent infection syndrome	1	1	Yes	['cd24 neutrophil', 'nampt neutrophil', 'neutrophil']	['monocyte', 'conventional dendritic cell', 'neutrophilic myeloblast']
618947	Arthrogryposis Multiplex Congenita 5	605204	TOR1A	Tor1a	1	1	PS617468	Arthrogryposis multiplex congenita	1	1	No
618963	Immunodeficiency 69, Mycobacteriosis	147570	IFNG	Ifng	1	1	PS300755	Immunodeficiency (Select Examples)	1	1	Yes
618969	Immunodeficiency 70	609209	IVNS1ABP	Ivns1abp	1	1	PS300755	Immunodeficiency (Select Examples)	1	1	Yes
618972	Mitochondrial Dna Depletion Syndrome 19	606794	SLC25A10	Slc25a10	1	1	PS603041	Mitochondrial DNA depletion syndrome	0	1	Yes
618982	Immunodeficiency 72 With Autoinflammation	141180	NCKAP1L	Nckap1l	1	1	PS300755	Immunodeficiency (Select Examples)	1	1	Yes
618986	Immunodeficiency 73b With Defective Neutrophil Chemotaxis And Lymphopenia	602049	RAC2	Rac2	1	1	PS300755	Immunodeficiency (Select Examples)	1	1	Yes
618987	Immunodeficiency 73c With Defective Neutrophil Chemotaxis And Hypogammaglobulinemia	602049	RAC2	Rac2	1	1	PS300755	Immunodeficiency (Select Examples)	1	1	Yes
618999	Autoinflammation, Immune Dysregulation, And Eosinophilia	147795	JAK1	Jak1	1	1			1	1	Yes
619004	Deeah Syndrome	603584	MADD	Madd	1	1			1	1	Yes
619005	Neurodevelopmental Disorder With Dysmorphic Facies, Impaired Speech And Hypotonia	603584	MADD	Madd	1	1			1	1	No
619013	Rajab Interstitial Lung Disease With Brain Calcifications 2	602918	FARSA	Farsa	1	1	PS613658	Rajab interstitial lung disease with brain calcifications	1	1	NA	['erythroid progenitor']
619041	Monosomy 7 Myelodysplasia And Leukemia Syndrome 2	610456	SAMD9		1	1	PS252270	Monosomy 7 myelodysplasia and leukemia syndrome	1	0
619046	Mitochondrial Complex Iv Deficiency, Nuclear Type 3	602125	COX10	Cox10	1	1	PS220110	Mitochondrial complex IV deficiency, nuclear-type	1	1	Yes
619055	Mitochondrial Complex Iv Deficiency, Nuclear Type 12	614770	PET100	Pet100	1	1	PS220110	Mitochondrial complex IV deficiency, nuclear-type	1	0
619087	Noonan Syndrome 13	176948	MAPK1	Mapk1	1	1	PS163950	Noonan syndrome	1	1	Yes
619096	Mismatch Repair Cancer Syndrome 2	609309	MSH2	Msh2	1	1	PS276300	Mismatch repair cancer syndrome	1	1	Yes	['erythroid progenitor', 'myeloid progenitor']	['precursor B cell']
619097	Mismatch Repair Cancer Syndrome 3	600678	MSH6	Msh6	1	1	PS276300	Mismatch repair cancer syndrome	1	1	Yes	['erythroid progenitor', 'myeloid progenitor']	['precursor B cell']
619101	Mismatch Repair Cancer Syndrome 4	600259	PMS2	Pms2	1	1	PS276300	Mismatch repair cancer syndrome	1	1	Yes	['erythroid progenitor', 'myeloid progenitor']	['precursor B cell']
619115	Combined Osteogenesis Imperfecta And Ehlers-danlos Syndrome 1	120150	COL1A1	Col1a1	1	1	PS619115	Combined osteogenesis imperfecta and Ehlers-Danlos syndrome	0	0
619120	Combined Osteogenesis Imperfecta And Ehlers-danlos Syndrome 2	120160	COL1A2	Col1a2	1	1	PS619115	Combined osteogenesis imperfecta and Ehlers-Danlos syndrome	0	0
619126	Immunodeficiency 75	612839	TET2	Tet2	1	1	PS300755	Immunodeficiency (Select Examples)	1	1	Yes
619127	Mandibuloacral Dysplasia Progeroid Syndrome	608555	MTX2	Mtx2	1	1			1	1	No
619130	Thrombocytopenia, Autosomal Dominant, 7	606238	IKZF5	Ikzf5	1	1	PS313900	Thrombocytopenia	1	1	Yes

## Sheet: Lung
Supplementary File 1B. Diseases, disease genes, and likely-affected cell types of lung.
Disease accession (OMIM)	Disease name (OMIM)	Gene accession (OMIM)	Gene symbol (OMIM)	Mouse ortholog (MGI)	Known molecular basis (1=Yes, 0=No)	Germline aberrations (1=Yes, 0=No)	Phenotypic series accession (OMIM)	Phenotypic series name (OMIM)	Expressed in human tissue (1=Yes, 0=No)	Expressed in mouse tissue (1=Yes, 0=No)	Inflicted (ODiseA)	Human likely-affected cell types	Mouse similar likely-affected cell types
100300	Adams-oliver Syndrome	610911	ARHGAP31	Arhgap31	1	1	PS100300	Adams-Oliver syndrome	1	1	No
102700	Severe Combined Immunodeficiency, Autosomal Recessive, T Cell-negative,b Cell-negative, Nk Cell-negative, Due To Adenosine Deaminase Deficiency	608958	ADA	Ada	1	1			1	1	Yes		['pulmonary artery endothelial cell']
108900	Atrial Septal Defect With Atrioventricular Conduction Defects	600584	NKX2-5	Nkx2-5	1	1	PS108800	Atrial septal defect	0	0
115197	Cardiomyopathy, Familial Hypertrophic, 4	600958	MYBPC3	Mybpc3	1	1	PS192600	Cardiomyopathy, familial hypertrophic	0	0
118450	Alagille Syndrome 1	601920	JAG1	Jag1	1	1	PS118450	Alagille syndrome	1	1	No
122470	Cornelia De Lange Syndrome 1	608667	NIPBL	Nipbl	1	1	PS122470	Cornelia de Lange syndrome	1	1	Yes
123700	Cutis Laxa, Autosomal Dominant 1	130160	ELN		1	1	PS123700	Cutis laxa	1	0		['adventitial cell', 'alveolar fibroblast', 'bronchial smooth muscle cell', 'vascular associated smooth muscle cell']	['fibroblast', 'fibroblast.1']
127550	Dyskeratosis Congenita, Autosomal Dominant	602322	TERC		1	1	PS127550	Dyskeratosis congenita	0	0
130000	Ehlers-danlos Syndrome, Type I	120215	COL5A1	Col5a1	1	1	PS130000	Ehlers-Danlos syndrome	1	1	No	['adventitial cell', 'alveolar fibroblast', 'pericyte cell', 'vascular associated smooth muscle cell']	['fibroblast.1']
130010	Ehlers-danlos Syndrome, Classic Type, 2	120190	COL5A2	Col5a2	1	1	PS130000	Ehlers-Danlos syndrome	1	1	No	['adventitial cell', 'alveolar fibroblast', 'pericyte cell', 'vascular associated smooth muscle cell']	['fibroblast.1']
130050	Ehlers-danlos Syndrome, Vascular Type	120180	COL3A1	Col3a1	1	1	PS130000	Ehlers-Danlos syndrome	1	1	Yes	['adventitial cell', 'alveolar fibroblast', 'pericyte cell', 'vascular associated smooth muscle cell']	['fibroblast.1']
134610	Familial Mediterranean Fever, Ad	608107	MEFV	Mefv	1	1			1	1	No
135150	Birt-hogg-dube Syndrome	607273	FLCN	Flcn	1	1			1	1	Yes
135900	Coffin-siris Syndrome 1	614556	ARID1B	Arid1b	1	1	PS135900	Coffin-Siris syndrome	1	1	Yes
135900	Coffin-siris Syndrome 1	614556	ARID1B	Arid1b	1	1	PS156200	Mental retardation, autosomal dominant	1	1	Yes
137940	Hypotrichosis-lymphedema-telangiectasia-renal Defect Syndrome	601618	SOX18	Sox18	1	1			1	1	Yes	['endothelial cell of artery']
142680	Periodic Fever, Familial, Autosomal Dominant	191190	TNFRSF1A	Tnfrsf1a	1	1			1	1	No
145410	Opitz Gbbb Syndrome, Autosomal Dominant	614140	SPECC1L	Specc1l	1	1	PS300000	Opitz GBBB syndrome	1	1	Yes		['fibroblast']
146510	Pallister-hall Syndrome 1	165240	GLI3	Gli3	1	1			1	1	Yes
147060	Hyper-ige Recurrent Infection Syndrome	102582	STAT3	Stat3	1	1	PS147060	Hyper-IgE recurrent infection syndrome	1	1	Yes	['neutrophil']	['non-classical monocyte']
147920	Kabuki Syndrome	602113	KMT2D	Kmt2d	1	1	PS147920	Kabuki syndrome	1	0
150550	Periodic Fever, Immunodeficiency, And Thrombocytopenia Syndrome	604734	WDR1	Wdr1	1	1			1	1	Yes
151623	Li-fraumeni Syndrome 1	191170	TP53	Trp53	1	1	PS151623	Li-Fraumeni syndrome	1	1	Yes
152700	Systemic Lupus Erythematosus	600716	PTPN22	Ptpn22	1	1			1	1	Yes	['cd8-positive, alpha-beta t cell']	['classical monocyte', 'non-classical monocyte']
152700	Systemic Lupus Erythematosus	146790	FCGR2A	Fcgr3	1	1			1	1	Yes	['cd8-positive, alpha-beta t cell']	['classical monocyte', 'non-classical monocyte']
152700	Systemic Lupus Erythematosus	604590	FCGR2B	Fcgr2b	1	1			1	1	Yes	['cd8-positive, alpha-beta t cell']	['classical monocyte', 'non-classical monocyte']
152700	Systemic Lupus Erythematosus	123890	CTLA4	Ctla4	1	1			1	0	Yes	['cd8-positive, alpha-beta t cell']	['classical monocyte', 'non-classical monocyte']
152700	Systemic Lupus Erythematosus	606609	TREX1	Trex1	1	1			0	1	Yes	['cd8-positive, alpha-beta t cell']	['classical monocyte', 'non-classical monocyte']
152700	Systemic Lupus Erythematosus	125505	DNASE1	Dnase1	1	1			1	0	Yes	['cd8-positive, alpha-beta t cell']	['classical monocyte', 'non-classical monocyte']
154700	Marfan Syndrome	134797	FBN1	Fbn1	1	1			1	1	Yes	['adventitial cell']
158310	Mucoepithelial Dysplasia, Hereditary	184756	SREBF1	Srebf1	1	1			1	1	Yes
159950	Spinal Muscular Atrophy With Progressive Myoclonic Epilepsy	613468	ASAH1	Asah1	1	1			1	1	Yes
167800	Pancreatitis, Hereditary	601405	CTRC	Ctrc	1	1			0	0	No
167800	Pancreatitis, Hereditary	167790	SPINK1	Spink1	1	1			0	0	No
167800	Pancreatitis, Hereditary	602421	CFTR	Cftr	1	1			1	1	No
167800	Pancreatitis, Hereditary	276000	PRSS1	Try10	1	1			0	0	No
167800	Pancreatitis, Hereditary	601564	PRSS2	Prss2	1	1			0	0	No
170100	Prolidase Deficiency	613230	PEPD	Pepd	1	1			1	1	Yes
173600	Pneumothorax, Primary Spontaneous	607273	FLCN	Flcn	1	1			1	1	Yes
175050	Juvenile Polyposis/hereditary Hemorrhagic Telangiectasia Syndrome	600993	SMAD4	Smad4	1	1			1	1	Yes
176270	Prader-willi Syndrome	602117	NDN	Ndn	1	1			1	1	Yes
176270	Prader-willi Syndrome	182279	SNRPN	Snrpn	1	1			1	0	Yes
178500	Pulmonary Fibrosis, Idiopathic	178642	SFTPA2		1	1			1	0		['respiratory mucous cell', 'type ii pneumocyte']
178500	Pulmonary Fibrosis, Idiopathic	600770	MUC5B	Muc5b	1	1			1	0		['respiratory mucous cell', 'type ii pneumocyte']
178600	Pulmonary Hypertension, Primary, 1	600799	BMPR2	Bmpr2	1	1	PS178600	Pulmonary hypertension, primary	1	1	Yes
180295	Rhabdomyosarcoma, Embryonal, 2	606241	DICER1	Dicer1	1	1			1	1	No
180849	Rubinstein-taybi Syndrome 1	600140	CREBBP	Crebbp	1	1	PS180849	Rubinstein-Taybi syndrome	1	1	Yes
181000	Sarcoidosis, Susceptibility To, 1	142857	HLA-DRB1		1	1			1	0		['dendritic cell']
182250	Singleton-merten Syndrome	606951	IFIH1	Ifih1	1	1	PS182250	Singleton-Merten syndrome	1	1	NA
184260	Osteochondrodysplasia	604505	TRIP11	Trip11	1	1			1	1	Yes
185500	Supravalvular Aortic Stenosis	130160	ELN		1	1			1	0
187300	Telangiectasia, Hereditary Hemorrhagic, Type 1	131195	ENG	Eng	1	1	PS187300	Telangiectasia, hereditary hemorrhagic	1	1	Yes	['capillary aerocyte', 'capillary endothelial cell', 'endothelial cell of artery', 'vein endothelial cell']	['pulmonary artery endothelial cell', 'capillary endothelial cell']
190350	Trichorhinophalangeal Syndrome, Type I	604386	TRPS1	Trps1	1	1	PS190350	Trichorhinophalangeal syndrome	1	1	NA
191100	Tuberous Sclerosis-1	605284	TSC1	Tsc1	1	1	PS191100	Tuberous sclerosis	1	1	Yes
191830	Renal Hypodysplasia/aplasia 1	604063	ITGA8	Itga8	1	1	PS191830	Renal hypodysplasia/aplasia	1	1	Yes		['fibroblast']
192430	Velocardiofacial Syndrome	602054	TBX1	Tbx1	1	1			1	1	Yes
193300	Von Hippel-lindau Syndrome	608537	VHL	Vhl	1	1			1	0	Yes
193300	Von Hippel-lindau Syndrome	168461	CCND1	Ccnd1	1	1			1	1	Yes
193670	Whim Syndrome	162643	CXCR4	Cxcr4	1	1			1	1	Yes
193700	Arthrogryposis, Distal, Type 2a	160720	MYH3	Myh3	1	1	PS108120	Arthrogryposis, distal	0	0
203300	Hermansky-pudlak Syndrome	604982	HPS1	Hps1	1	1	PS203300	Hermansky-Pudlak syndrome	1	0	Yes		['alveolar macrophage']
203800	Alstrom Syndrome	606844	ALMS1	Alms1	1	1			1	1	NA
208050	Arterial Tortuosity Syndrome	606145	SLC2A10	Slc2a10	1	1			1	1	No
208150	Fetal Akinesia Deformation Sequence	601296	MUSK	Musk	1	1	PS208150	Fetal akinesia deformation sequence	1	0
208400	Aspartylglucosaminuria	613228	AGA	Aga	1	1			1	1	NA
208530	Asplenia With Cardiovascular Anomalies	602880	GDF1	Gdf1	1	1			0	0
208540	Renal-hepatic-pancreatic Dysplasia	608002	NPHP3	Nphp3	1	1	PS208540	Renal-hepatic-pancreatic dysplasia	1	1	Yes
208900	Ataxia-telangiectasia	607585	ATM	Atm	1	1			1	1	Yes	['nk cell']
209920	Bare Lymphocyte Syndrome, Type Ii	601863	RFX5		1	1			1	0	NA
209920	Bare Lymphocyte Syndrome, Type Ii	601861	RFXAP	Rfxap	1	1			1	1	NA
209920	Bare Lymphocyte Syndrome, Type Ii	600005	CIITA	Ciita	1	1			1	1	NA
209920	Bare Lymphocyte Syndrome, Type Ii	603200	RFXANK	Rfxank	1	1			1	1	NA
209950	Immunodeficiency 27a, Mycobacteriosis, Ar	107470	IFNGR1	Ifngr1	1	1	PS300755	Immunodeficiency (Select Examples)	1	1	Yes	['cd8-positive, alpha-beta t cell', 'nk cell']	['lymphocyte']
210900	Bloom Syndrome	604610	BLM	Blm	1	1	PS210900	Microcephaly, growth restriction and increased sister chromatid exchange	1	0
211400	Bronchiectasis	602421	CFTR	Cftr	1	1	PS211400	Bronchiectasis	1	1	Yes	['club cell', 'pulmonary ionocyte', 'respiratory mucous cell']	['pulmonary ionocyte; type II pneumocyte']
211400	Bronchiectasis	600760	SCNN1B	Scnn1b	1	1	PS211400	Bronchiectasis	1	1	Yes	['club cell', 'pulmonary ionocyte', 'respiratory mucous cell']	['pulmonary ionocyte; type II pneumocyte']
211530	Bulbar Palsy, Progressive, With Sensorineural Deafness	613350	SLC52A3	Slc52a3	1	1	PS211530	Brown-Vialetto-Van Laere syndrome	1	1	Yes
211980	Lung Cancer, Susceptibility To	134638	FASLG	Fasl	1	1			0	1	Yes
211980	Lung Cancer, Susceptibility To	601763	CASP8	Casp8	1	1			1	1	Yes
211980	Lung Cancer, Susceptibility To	131550	EGFR	Egfr	1	1			1	1	Yes
211980	Lung Cancer, Susceptibility To	609413	ERCC6	Ercc6	1	1			1	0	Yes
211980	Lung Cancer, Susceptibility To	122720	CYP2A6	Cyp2a4	1	1			0	0	Yes
211980	Lung Cancer, Susceptibility To	122720	CYP2A6	Cyp2a5	1	1			0	1	Yes
212720	Martsolf Syndrome	609275	RAB3GAP2	Rab3gap2	1	1			1	1	NA
214100	Zellweger Syndrome	602136	PEX1	Pex1	1	1	PS214100	Peroxisome biogenesis disorder	1	0
215140	Hydrops-ectopic Calcification-moth-eaten Skeletal Dysplasia	600024	LBR	Lbr	1	1			1	1	NA
215150	Otospondylomegaepiphyseal Dysplasia	120290	COL11A2	Col11a2	1	1	PS184840	Otospondylomegaepiphyseal dysplasia	0	0
217090	Plasminogen Deficiency, Type Iligneous Conjunctivitis, Included	173350	PLG	Plg	1	1			0	0
218000	Agenesis Of The Corpus Callosum With Peripheral Neuropathy	604878	SLC12A6	Slc12a6	1	1			1	1	No
218040	Costello Syndrome	190020	HRAS	Hras	1	1			1	0
219000	Fraser Syndrome	607830	FRAS1	Fras1	1	1	PS219000	Fraser syndrome	1	0	Yes	['mesothelial cell']
219100	Cutis Laxa, Autosomal Recessive, Type I	604580	FBLN5	Fbln5	1	1	PS123700	Cutis laxa	1	1	Yes	['adventitial cell', 'alveolar fibroblast', 'bronchial smooth muscle cell', 'vascular associated smooth muscle cell']	['fibroblast', 'fibroblast.1']
219700	Cystic Fibrosis	146790	FCGR2A	Fcgr3	1	1			1	1	Yes		['classical monocyte']
219700	Cystic Fibrosis	602421	CFTR	Cftr	1	1			1	1	Yes		['classical monocyte']
219700	Cystic Fibrosis	190180	TGFB1	Tgfb1	1	1			0	1	Yes		['classical monocyte']
222700	Lysinuric Protein Intolerance	603593	SLC7A7	Slc7a7	1	1			1	1	Yes	['intermediate monocyte', 'non-classical monocyte']
223900	Neuropathy, Hereditary Sensory And Autonomic, Type Iii	603722	ELP1	Elp1	1	1	PS162400	Hereditary sensory and autonomic neuropathy	1	0
224230	Dyskeratosis Congenita, Autosomal Recessive, 1	606471	NOP10	Nop10	1	1	PS127550	Dyskeratosis congenita	1	1	Yes
224410	Dyssegmental Dysplasia, Silverman-handmaker Type	142461	HSPG2	Hspg2	1	1			1	1	Yes	['bronchial vessel endothelial cell', 'lung microvascular endothelial cell', 'vein endothelial cell']
225400	Ehlers-danlos Syndrome, Type Vi	153454	PLOD1	Plod1	1	1	PS130000	Ehlers-Danlos syndrome	1	1	Yes	['adventitial cell', 'alveolar fibroblast', 'pericyte cell', 'vascular associated smooth muscle cell']	['fibroblast.1']
225410	Ehlers-danlos Syndrome, Type Vii, Autosomal Recessive	604539	ADAMTS2	Adamts2	1	1	PS130000	Ehlers-Danlos syndrome	1	1	Yes	['adventitial cell', 'alveolar fibroblast', 'pericyte cell', 'vascular associated smooth muscle cell']	['fibroblast.1']
226300	Complement Hyperactivation, Angiopathic Thrombosis, And Protein-losing Enteropathy	125240	CD55	Cd55	1	1			1	1	Yes
226300	Complement Hyperactivation, Angiopathic Thrombosis, And Protein-losing Enteropathy	125240	CD55	Cd55b	1	1			1	0	Yes
226990	Immunodeficiency 32b	601565	IRF8	Irf8	1	1	PS300755	Immunodeficiency (Select Examples)	1	1	Yes	['cd8-positive, alpha-beta t cell', 'nk cell']	['lymphocyte']
230000	Fucosidosis	612280	FUCA1	Fuca1	1	1			1	1	NA
230800	Gaucher Disease, Type I	606463	GBA	Gba	1	1			1	1	Yes
230900	Gaucher Disease, Type Ii	606463	GBA	Gba	1	1			1	1	Yes
231680	Multiple Acyl-coa Dehydrogenase Deficiency	231675	ETFDH	Etfdh	1	1			1	1	Yes
231680	Multiple Acyl-coa Dehydrogenase Deficiency	608053	ETFA	Etfa	1	1			1	1	Yes
231680	Multiple Acyl-coa Dehydrogenase Deficiency	130410	ETFB	Etfb	1	1			1	1	Yes
232300	Glycogen Storage Disease Ii	606800	GAA	Gaa	1	1			1	1	Yes
233650	Combined Cellular And Humoral Immune Defects With Granulomas	179615	RAG1	Rag1	1	1			0	0
233650	Combined Cellular And Humoral Immune Defects With Granulomas	179616	RAG2	Rag2	1	1			0	0
233690	Granulomatous Disease, Chronic, Autosomal Recessive, Cytochrome B-negative	608508	CYBA	Cyba	1	1	PS306400	Granulomatous disease, chronic	1	1	Yes	['classical monocyte', 'intermediate monocyte', 'macrophage', 'neutrophil', 'plasmacytoid dendritic cell']	['neutrophil', 'classical monocyte', 'non-classical monocyte']
233700	Granulomatous Disease, Chronic, Autosomal Recessive, Cytochrome B-positive, Type I	608512	NCF1	Ncf1	1	1	PS306400	Granulomatous disease, chronic	1	1	Yes	['classical monocyte', 'intermediate monocyte', 'macrophage', 'neutrophil', 'plasmacytoid dendritic cell']	['neutrophil', 'classical monocyte', 'non-classical monocyte']
233710	Granulomatous Disease, Chronic, Autosomal Recessive, Cytochrome B-positive, Type Ii	608515	NCF2	Ncf2	1	1	PS306400	Granulomatous disease, chronic	1	1	Yes	['classical monocyte', 'intermediate monocyte', 'macrophage', 'neutrophil', 'plasmacytoid dendritic cell']	['neutrophil', 'classical monocyte', 'non-classical monocyte']
234810	Pulmonary Venoocclusive Disease 2	609280	EIF2AK4	Eif2ak4	1	1	PS265450	Pulmonary venoocclusive disease	1	1	Yes
235200	Hemochromatosis	613609	HFE	Hfe	1	1	PS235200	Hemochromatosis	1	1	Yes		['non-classical monocyte']
235200	Hemochromatosis	112261	BMP2	Bmp2	1	1	PS235200	Hemochromatosis	1	0	Yes		['non-classical monocyte']
235510	Hennekam Lymphangiectasia-lymphedema Syndrome	612753	CCBE1	Ccbe1	1	1	PS235510	Hennekam lymphangiectasia-lymphedema syndrome	1	0		['alveolar fibroblast']
235730	Mowat-wilson Syndrome	605802	ZEB2	Zeb2	1	1			1	1	No
236500	Multinucleated Neurons, Anhydramnios, Renal Dysplasia, Cerebellar Hypoplasia, And Hydranencephaly	610000	CEP55	Cep55	1	1			0	0
236680	Hydrolethalus Syndrome 1	610693	HYLS1	Hyls1	1	1	PS236680	Hydrolethalus syndrome	1	0
236700	Mckusick-kaufman Syndrome	604896	MKKS	Mkks	1	1			1	1	NA
240500	Immunodeficiency, Common Variable, 2	604907	TNFRSF13B	Tnfrsf13b	1	1	PS607594	Immunodeficiency, common variable	1	1	Yes	['b cell']	['B cell']
241500	Hypophosphatasia, Infantile	171760	ALPL	Alpl	1	1			1	0
241600	Hypoproteinemia, Hypercatabolic	109700	B2M	B2m	1	1	PS300755	Immunodeficiency (Select Examples)	1	1	Yes	['cd8-positive, alpha-beta t cell', 'nk cell']	['lymphocyte']
241800	Hypothalamic Hamartomascongenital Hypothalamic Hamartoma Syndrome, Included	601500	SMO	Smo	1	1			1	1	No
242840	Immunodeficiency With Cleft Lip/palate, Cataract, Hypopigmentation,and Absent Corpus Callosum	615068	EPG5	Epg5	1	1			1	0
242860	Immunodeficiency-centromeric Instability-facial Anomalies Syndrome1	602900	DNMT3B	Dnmt3b	1	1	PS242860	Immunodeficiency-centromeric instability-facial anomalies	0	0
243700	Hyperimmunoglobulin E-recurrent Infection Syndrome, Autosomal Recessive	611432	DOCK8	Dock8	1	1	PS147060	Hyper-IgE recurrent infection syndrome	1	1	Yes	['neutrophil']	['non-classical monocyte']
244400	Kartagener Syndrome	604366	DNAI1	Dnai1	1	1	PS244400	Primary ciliary dyskinesia	1	0	Yes	['lung ciliated cell']	['ciliated epithelial cell']
245150	Keutel Syndrome	154870	MGP	Mgp	1	1			1	1	Yes
248700	Marden-walker Syndrome	613629	PIEZO2	Piezo2	1	1			1	0		['alveolar fibroblast']
249000	Meckel Syndrome, Type 1	609883	MKS1	Mks1	1	1	PS249000	Meckel syndrome	1	1	Yes
249100	Familial Mediterranean Fever, Ar	608107	MEFV	Mefv	1	1			1	1	No
251230	Microcephaly-micromelia Syndrome	611428	DONSON	Donson	1	1			1	1	Yes
251260	Nijmegen Breakage Syndrome	602667	NBN	Nbn	1	1			1	1	Yes		['non-classical monocyte']
252500	Mucolipidosis Ii Alpha/beta	607840	GNPTAB	Gnptab	1	1			1	1	Yes
252900	Mucopolysaccharidosis Type Iiia	605270	SGSH	Sgsh	1	1	PS607014	Mucopolysaccharidoses	1	1	Yes	['adventitial cell', 'endothelial cell of lymphatic vessel', 'macrophage']	['alveolar macrophage']
252920	Mucopolysaccharidosis Type Iiib	609701	NAGLU	Naglu	1	1	PS607014	Mucopolysaccharidoses	1	1	Yes	['adventitial cell', 'endothelial cell of lymphatic vessel', 'macrophage']	['alveolar macrophage']
252930	Mucopolysaccharidosis Type Iiic	610453	HGSNAT	Hgsnat	1	1	PS607014	Mucopolysaccharidoses	1	1	NA	['adventitial cell', 'endothelial cell of lymphatic vessel', 'macrophage']	['alveolar macrophage']
252940	Mucopolysaccharidosis Type Iiid	607664	GNS	Gns	1	1			1	1	NA
253000	Morquio Syndrome A	612222	GALNS	Galns	1	1	PS607014	Mucopolysaccharidoses	1	1	Yes	['adventitial cell', 'endothelial cell of lymphatic vessel', 'macrophage']	['alveolar macrophage']
253010	Morquio Syndrome B	611458	GLB1	Glb1	1	1	PS607014	Mucopolysaccharidoses	1	1	Yes	['adventitial cell', 'endothelial cell of lymphatic vessel', 'macrophage']	['alveolar macrophage']
253200	Mucopolysaccharidosis Type Vi	611542	ARSB	Arsb	1	1	PS607014	Mucopolysaccharidoses	1	1	Yes	['adventitial cell', 'endothelial cell of lymphatic vessel', 'macrophage']	['alveolar macrophage']
253220	Mucopolysaccharidosis, Type Vii	611499	GUSB	Gusb	1	1	PS607014	Mucopolysaccharidoses	1	1	Yes	['adventitial cell', 'endothelial cell of lymphatic vessel', 'macrophage']	['alveolar macrophage']
253290	Multiple Pterygium Syndrome, Lethal Type	100690	CHRNA1	Chrna1	1	1			0	0
253290	Multiple Pterygium Syndrome, Lethal Type	100720	CHRND	Chrnd	1	1			0	0
253290	Multiple Pterygium Syndrome, Lethal Type	100730	CHRNG	Chrng	1	1			0	0
253300	Spinal Muscular Atrophy, Type I	600354	SMN1	Smn1	1	1			1	1	Yes
253310	Lethal Congenital Contracture Syndrome 1	603371	GLE1	Gle1	1	1	PS253310	Lethal congenital contracture syndrome	1	1	Yes
253550	Spinal Muscular Atrophy, Type Ii	600354	SMN1	Smn1	1	1			1	1	Yes
253700	Muscular Dystrophy, Limb-girdle, Type 2c	608896	SGCG	Sgcg	1	1	PS253600	Muscular dystrophy, limb-girdle, autosomal recessive	1	1	Yes	['adventitial cell', 'alveolar fibroblast']	['myofibroblast cell', 'fibroblast', 'fibroblast.1']
254090	Ullrich Congenital Muscular Dystrophy 1	120250	COL6A3	Col6a3	1	1	PS253600	Muscular dystrophy, limb-girdle, autosomal recessive	1	1	Yes	['adventitial cell', 'alveolar fibroblast']	['myofibroblast cell', 'fibroblast', 'fibroblast.1']
254090	Ullrich Congenital Muscular Dystrophy 1	120250	COL6A3	Col6a3	1	1	PS254090	Ullrich congenital muscular dystrophy	1	1	Yes	['adventitial cell', 'alveolar fibroblast']	['myofibroblast cell', 'fibroblast', 'fibroblast.1']
254090	Ullrich Congenital Muscular Dystrophy 1	120220	COL6A1	Col6a1	1	1	PS253600	Muscular dystrophy, limb-girdle, autosomal recessive	1	1	Yes	['adventitial cell', 'alveolar fibroblast']	['myofibroblast cell', 'fibroblast', 'fibroblast.1']
254090	Ullrich Congenital Muscular Dystrophy 1	120220	COL6A1	Col6a1	1	1	PS254090	Ullrich congenital muscular dystrophy	1	1	Yes	['adventitial cell', 'alveolar fibroblast']	['myofibroblast cell', 'fibroblast', 'fibroblast.1']
254090	Ullrich Congenital Muscular Dystrophy 1	120240	COL6A2	Col6a2	1	1	PS253600	Muscular dystrophy, limb-girdle, autosomal recessive	1	1	Yes	['adventitial cell', 'alveolar fibroblast']	['myofibroblast cell', 'fibroblast', 'fibroblast.1']
254090	Ullrich Congenital Muscular Dystrophy 1	120240	COL6A2	Col6a2	1	1	PS254090	Ullrich congenital muscular dystrophy	1	1	Yes	['adventitial cell', 'alveolar fibroblast']	['myofibroblast cell', 'fibroblast', 'fibroblast.1']
255320	Minicore Myopathy With External Ophthalmoplegia	180901	RYR1	Ryr1	1	1			1	1	Yes		['non-classical monocyte']
256040	Proteasome-associated Autoinflammatory Syndrome 1 And Digenic Forms	177046	PSMB8	Psmb8	1	1	PS256040	Proteosome-associated autoinflammatory syndrome	1	1	No
256050	Atelosteogenesis, Type Ii	606718	SLC26A2	Slc26a2	1	1	PS108720	Atelosteogenesis	1	1	Yes	['capillary endothelial cell']
256520	Neu-laxova Syndrome	606879	PHGDH	Phgdh	1	1	PS256520	Neu-Laxova syndrome	1	1	Yes
257200	Niemann-pick Disease, Type A	607608	SMPD1	Smpd1	1	1			1	1	Yes
258315	Omodysplasia, Generalized Form	604404	GPC6	Gpc6	1	1	PS258315	Omodysplasia	1	1	No
258480	Opsismodysplasia	600829	INPPL1	Inppl1	1	1			1	1	NA
259775	Raine Syndrome	611061	FAM20C	Fam20c	1	1			1	1	Yes
261740	Glycogen Storage Disease Of Heart, Lethal Congenital	602743	PRKAG2	Prkag2	1	1			1	1	Yes
262850	Plasmin Inhibitor Deficiency	613168	SERPINF2	Serpinf2	1	1			1	0
263200	Polycystic Kidney Disease, Autosomal Recessive	606702	PKHD1	Pkhd1	1	1	PS173900	Polycystic kidney disease	0	0
263210	Gillessen-kaesbach-nishimura Syndrome	606941	ALG9	Alg9	1	1			1	1	Yes
263520	Short-rib Thoracic Dysplasia 6 With Or Without Polydactyly	604588	NEK1	Nek1	1	1	PS208500	Short-rib thoracic dysplasia	1	1	Yes	['lung ciliated cell']	['ciliated epithelial cell']
264090	Progeroid Syndrome, Neonatal	614258	POLR3A	Polr3a	1	1	PS176670	Progeria	1	0
264350	Pseudohypoaldosteronism, Type I, Autosomal Recessive	600228	SCNN1A	Scnn1a	1	1			1	1	Yes	['club cell', 'pulmonary ionocyte', 'respiratory goblet cell', 'respiratory mucous cell']	['pulmonary ionocyte; type II pneumocyte']
264350	Pseudohypoaldosteronism, Type I, Autosomal Recessive	600761	SCNN1G	Scnn1g	1	1			1	0	Yes	['club cell', 'pulmonary ionocyte', 'respiratory goblet cell', 'respiratory mucous cell']	['pulmonary ionocyte; type II pneumocyte']
264350	Pseudohypoaldosteronism, Type I, Autosomal Recessive	600760	SCNN1B	Scnn1b	1	1			1	1	Yes	['club cell', 'pulmonary ionocyte', 'respiratory goblet cell', 'respiratory mucous cell']	['pulmonary ionocyte; type II pneumocyte']
265000	Multiple Pterygium Syndrome, Escobar Variant	100730	CHRNG	Chrng	1	1			0	0
265100	Pulmonary Alveolar Microlithiasis	604217	SLC34A2	Slc34a2	1	1			1	1	Yes		['pulmonary ionocyte; type II pneumocyte']
265120	Surfactant Metabolism Dysfunction, Pulmonary, 1	178640	SFTPB	Sftpb	1	1	PS265120	Surfactant metabolism dysfunction, pulmonary	1	1	Yes	['type ii pneumocyte']	['pulmonary ionocyte; type II pneumocyte']
265380	Alveolar Capillary Dysplasia With Misalignment Of Pulmonary Veins	601089	FOXF1	Foxf1	1	1			1	0
265450	Pulmonary Venoocclusive Disease 1	600799	BMPR2	Bmpr2	1	1	PS265450	Pulmonary venoocclusive disease	1	1	Yes
266265	Congenital Disorder Of Glycosylation, Type Iic	605881	SLC35C1	Slc35c1	1	1	PS212066	Congenital disorders of glycosylation, type II	1	1	Yes
267430	Renal Tubular Dysgenesis	179820	REN	Ren1	1	1			0	0	Yes
267430	Renal Tubular Dysgenesis	106150	AGT	Agt	1	1			1	1	Yes
267430	Renal Tubular Dysgenesis	106165	AGTR1	Agtr1a	1	1			1	1	Yes
267430	Renal Tubular Dysgenesis	106180	ACE	Ace	1	1			1	1	Yes
269840	Severe Combined Immunodeficiency, Atypical	176947	ZAP70	Zap70	1	1	PS300755	Immunodeficiency (Select Examples)	1	1	Yes	['cd8-positive, alpha-beta t cell', 'nk cell']	['lymphocyte']
270400	Smith-lemli-opitz Syndrome	602858	DHCR7	Dhcr7	1	1			1	1	Yes
271665	Spondylometaepiphyseal Dysplasia, Short Limb-hand Type	191311	DDR2	Ddr2	1	1			1	1	Yes
273395	Tetra-amelia, Autosomal Recessive	165330	WNT3	Wnt3	1	1			0	0
275210	Tight Skin Contracture Syndrome, Lethal	606480	ZMPSTE24	Zmpste24	1	1			1	1	Yes
275210	Tight Skin Contracture Syndrome, Lethal	150330	LMNA	Lmna	1	1			1	1	Yes
277300	Spondylocostal Dysostosis, Autosomal Recessive 1	602768	DLL3	Dll3	1	1	PS277300	Spondylocostal dysostosis	0	0
280000	Zunich Neuroectodermal Syndrome	605947	PIGL	Pigl	1	1			1	1	No
300209	Simpson-golabi-behmel Syndrome, Type 2	300170	OFD1	Ofd1	1	1			1	0
300260	Lubs X-linked Mental Retardation Syndrome	300005	MECP2	Mecp2	1	1	PS309510	Mental retardation, X-linked syndromic	1	1	No
300310	Agammaglobulinemia, X-linked, Type 2	300374	SH3KBP1	Sh3kbp1	1	1	PS300755	Immunodeficiency (Select Examples)	1	1	Yes	['cd8-positive, alpha-beta t cell', 'nk cell']	['lymphocyte']
300310	Agammaglobulinemia, X-linked, Type 2	300374	SH3KBP1	Sh3kbp1	1	1	PS601495	Agammaglobulinemia	1	1	Yes	['b cell']	['B cell']
300400	Severe Combined Immunodeficiency, X-linked	308380	IL2RG	Il2rg	1	1	PS300755	Immunodeficiency (Select Examples)	1	1	Yes	['cd8-positive, alpha-beta t cell', 'nk cell']	['lymphocyte']
300455	Retinitis Pigmentosa, X-linked, And Sinorespiratory Infections, Withor Without Deafness	312610	RPGR	Rpgr	1	1			1	1	NA
300514	Fanconi Anemia, Complementation Group B	300515	FANCB	Fancb	1	1	PS227650	Fanconi anemia	0	0
300635	Lymphoproliferative Syndrome, X-linked, 2	300079	XIAP	Xiap	1	1	PS308240	Lymphoproliferative syndrome	1	1	NA	['cd8-positive, alpha-beta t cell']	['lymphocyte']
300707	Toe Syndactyly, Telecanthus, And Anogenital And Renal Malformations	300708	CCNQ	Ccnq	1	1			1	0
300755	Agammaglobulinemia, X-linked	300300	BTK	Btk	1	1	PS300755	Immunodeficiency (Select Examples)	1	1	Yes	['cd8-positive, alpha-beta t cell', 'nk cell']	['lymphocyte']
300755	Agammaglobulinemia, X-linked	300300	BTK	Btk	1	1	PS601495	Agammaglobulinemia	1	1	Yes	['b cell']	['B cell']
300770	Surfactant Metabolism Dysfunction, Pulmonary, 4	306250	CSF2RA	Csf2ra	1	1	PS265120	Surfactant metabolism dysfunction, pulmonary	0	1	Yes	['type ii pneumocyte']	['pulmonary ionocyte; type II pneumocyte']
300853	Immunodeficiency, X-linked, With Magnesium Defect, Epstein-barr Virus Infection And Neoplasia	300715	MAGT1	Magt1	1	1			1	1	Yes
300855	Ogden Syndrome	300013	NAA10	Naa10	1	1			1	1	No
300968	Mental Retardation, X-linked 99, Syndromic, Female-restricted	300072	USP9X	Usp9x	1	1	PS309530	Mental retardation, nonsyndromic, X-linked	1	1	No
300978	Tonne-kalscheuer Syndrome	300379	RLIM	Rlim	1	1	PS309510	Mental retardation, X-linked syndromic	1	1	NA
300978	Tonne-kalscheuer Syndrome	300379	RLIM	Rlim	1	1	PS309530	Mental retardation, nonsyndromic, X-linked	1	1	NA
300988	Immunodeficiency 50	309845	MSN	Msn	1	1	PS300755	Immunodeficiency (Select Examples)	1	1	Yes	['cd8-positive, alpha-beta t cell', 'nk cell']	['lymphocyte']
300989	Meester-loeys Syndrome	301870	BGN	Bgn	1	1			1	1	No
300991	Ciliary Dyskinesia, Primary, 36, X-linked	300933	DNAAF6	Dnaaf6b	1	1	PS244400	Primary ciliary dyskinesia	0	0	Yes	['lung ciliated cell']	['ciliated epithelial cell']
300991	Ciliary Dyskinesia, Primary, 36, X-linked	300933	DNAAF6	Dnaaf6	1	1	PS244400	Primary ciliary dyskinesia	0	0	Yes	['lung ciliated cell']	['ciliated epithelial cell']
301000	Wiskott-aldrich Syndrome	300392	WAS	Was	1	1	PS300755	Immunodeficiency (Select Examples)	1	1	Yes	['cd8-positive, alpha-beta t cell', 'nk cell']	['lymphocyte']
301030	Van Esch-o'driscoll Syndrome	312040	POLA1	Pola1	1	1	PS309510	Mental retardation, X-linked syndromic	1	0
301044	Developmental And Epileptic Encephalopathy 85, With Or Without Midline Brain Defects	300040	SMC1A	Smc1a	1	1	PS308350	Developmental and epileptic encephalopathy	1	1	No
301220	Pigmentary Disorder, Reticulate, With Systemic Manifestations, X-linked	312040	POLA1	Pola1	1	1			1	0
301835	Arts Syndrome	311850	PRPS1	Prps1	1	1	PS309510	Mental retardation, X-linked syndromic	1	1	Yes
305000	Dyskeratosis Congenita, X-linked	300126	DKC1	Dkc1	1	1	PS127550	Dyskeratosis congenita	1	1	Yes
306400	Chronic Granulomatous Disease, X-linked	300481	CYBB	Cybb	1	1	PS306400	Granulomatous disease, chronic	1	1	Yes	['classical monocyte', 'intermediate monocyte', 'macrophage', 'neutrophil', 'plasmacytoid dendritic cell']	['neutrophil', 'classical monocyte', 'non-classical monocyte']
307200	Hypogammaglobulinemia And Isolated Growth Hormone Deficiency, X-linked	300300	BTK	Btk	1	1	PS262400	Isolated growth hormone deficiency	1	1	Yes	['basophil']
308050	Congenital Hemidysplasia With Ichthyosiform Erythroderma And Limb Defects	300275	NSDHL	Nsdhl	1	1			1	1	Yes
308230	Immunodeficiency, X-linked, With Hyper-igm	300386	CD40LG	Cd40lg	1	1	PS300755	Immunodeficiency (Select Examples)	1	0		['cd8-positive, alpha-beta t cell', 'nk cell']	['lymphocyte']
308230	Immunodeficiency, X-linked, With Hyper-igm	300386	CD40LG	Cd40lg	1	1	PS308230	Immunodeficiency with hyper-IgM	1	0		['cd4-positive, alpha-beta t cell']
308240	Lymphoproliferative Syndrome, X-linked, 1	300490	SH2D1A	Sh2d1a	1	1	PS300755	Immunodeficiency (Select Examples)	1	1	Yes	['cd8-positive, alpha-beta t cell', 'nk cell']	['lymphocyte']
308240	Lymphoproliferative Syndrome, X-linked, 1	300490	SH2D1A	Sh2d1a	1	1	PS308240	Lymphoproliferative syndrome	1	1	Yes	['cd8-positive, alpha-beta t cell']	['lymphocyte']
309350	Melnick-needles Syndrome	300017	FLNA	Flna	1	1			1	1	NA
309800	Microphthalmia, Syndromic 1	300013	NAA10	Naa10	1	1	PS309800	Microphthalmia, syndromic	1	1	Yes
312863	Combined Immunodeficiency, X-linked	308380	IL2RG	Il2rg	1	1	PS300755	Immunodeficiency (Select Examples)	1	1	Yes	['cd8-positive, alpha-beta t cell', 'nk cell']	['lymphocyte']
312870	Simpson-golabi-behmel Syndrome, Type 1	300037	GPC3	Gpc3	1	1			1	1	Yes		['fibroblast.1']
600001	Pancreatic Agenesis And Congenital Heart Defects	601656	GATA6	Gata6	1	1			1	1	No
600376	Osler-rendu-weber Syndrome 2	601284	ACVRL1	Acvrl1	1	1	PS187300	Telangiectasia, hereditary hemorrhagic	1	1	Yes	['capillary aerocyte', 'capillary endothelial cell', 'endothelial cell of artery', 'vein endothelial cell']	['pulmonary artery endothelial cell', 'capillary endothelial cell']
600802	Scid, Autosomal Recessive, T-negative/b-positive Type	600173	JAK3	Jak3	1	1			1	1	Yes
601005	Timothy Syndrome	114205	CACNA1C	Cacna1c	1	1			1	0
601186	Microphthalmia, Syndromic 9	610745	STRA6	Stra6	1	1	PS300345	Microphthalmia, isolated, with coloboma	1	0	Yes
601186	Microphthalmia, Syndromic 9	610745	STRA6	Stra6	1	1	PS309800	Microphthalmia, syndromic	1	0	Yes
601200	Pleuropulmonary Blastoma	606241	DICER1	Dicer1	1	1			1	1	Yes
601457	Severe Combined Immunodeficiency, Autosomal Recessive, T Cell-negative,b Cell-negative, Nk Cell-positive	179615	RAG1	Rag1	1	1			0	0
601457	Severe Combined Immunodeficiency, Autosomal Recessive, T Cell-negative,b Cell-negative, Nk Cell-positive	179616	RAG2	Rag2	1	1			0	0
601495	Agammaglobulinemia 1, Autosomal Recessive	147020	IGHM		1	1	PS601495	Agammaglobulinemia	1	0		['b cell']	['B cell']
601559	Stuve-wiedemann Syndrome	151443	LIFR	Lifr	1	1			1	1	NA
601776	Ehlers-danlos Syndrome, Musculocontractural Type	608429	CHST14	Chst14	1	1	PS130000	Ehlers-Danlos syndrome	1	1	Yes	['adventitial cell', 'alveolar fibroblast', 'pericyte cell', 'vascular associated smooth muscle cell']	['fibroblast.1']
602079	Trimethylaminuria	136132	FMO3	Fmo3	1	1			1	0
602088	Nephronophthisis 2	243305	INVS	Invs	1	1	PS256100	Nephronophthisis	1	0
602271	Spondylometaphyseal Dysplasia, Axial	603191	CFAP410	Cfap410	1	1	PS184255	Spondylometaphyseal dysplasia	1	0		['macrophage']
602398	Desmosterolosis	606418	DHCR24	Dhcr24	1	1			1	1	No
602450	Severe Combined Immunodeficiency With Sensitivity To Ionizing Radiation	605988	DCLRE1C	Dclre1c	1	1			1	1	Yes		['classical monocyte']
602535	Marshall-smith Syndrome	164005	NFIX	Nfix	1	1			1	1	Yes
603467	Fanconi Anemia, Complementation Group F	613897	FANCF	Fancf	1	1	PS227650	Fanconi anemia	1	0
603554	Omenn Syndrome	605988	DCLRE1C	Dclre1c	1	1			1	1	Yes		['classical monocyte']
603554	Omenn Syndrome	179615	RAG1	Rag1	1	1			0	0	Yes		['classical monocyte']
603554	Omenn Syndrome	179616	RAG2	Rag2	1	1			0	0	Yes		['classical monocyte']
603585	Congenital Disorder Of Glycosylation, Type Iif	605634	SLC35A1	Slc35a1	1	1	PS212066	Congenital disorders of glycosylation, type II	1	1	No
604173	Poikiloderma With Neutropenia	613276	USB1	Usb1	1	1			1	0
604571	Bare Lymphocyte Syndrome, Type I	170261	TAP2	Tap2	1	1			1	1	Yes	['capillary aerocyte', 'capillary endothelial cell', 'dendritic cell']	['pulmonary artery endothelial cell']
604571	Bare Lymphocyte Syndrome, Type I	170260	TAP1	Tap1	1	1			1	1	Yes	['capillary aerocyte', 'capillary endothelial cell', 'dendritic cell']	['pulmonary artery endothelial cell']
604571	Bare Lymphocyte Syndrome, Type I	601962	TAPBP	Tapbp	1	1			1	1	Yes	['capillary aerocyte', 'capillary endothelial cell', 'dendritic cell']	['pulmonary artery endothelial cell']
605258	Immunodeficiency With Hyper-igm, Type 2	605257	AICDA	Aicda	1	1	PS308230	Immunodeficiency with hyper-IgM	0	0		['cd4-positive, alpha-beta t cell']
606170	Genitopatellar Syndrome	605880	KAT6B		1	1			1	0
606217	Atrioventricular Septal Defect, Susceptibility To, 2	607170	CRELD1	Creld1	1	1	PS606215	Atrioventricular septal defect	1	1	No
606367	Immunodeficiency 41 With Lymphoproliferation And Autoimmunity	147730	IL2RA	Il2ra	1	1	PS300755	Immunodeficiency (Select Examples)	0	0	Yes	['cd8-positive, alpha-beta t cell', 'nk cell']	['lymphocyte']
606690	Lymphangioleiomyomatosis	605284	TSC1	Tsc1	1	1			1	1	Yes
606763	Ciliary Dyskinesia, Primary, 2	614566	DNAAF3	Dnaaf3	1	1	PS244400	Primary ciliary dyskinesia	1	0	Yes	['lung ciliated cell']	['ciliated epithelial cell']
607014	Hurler Syndrome	252800	IDUA	Idua	1	1	PS607014	Mucopolysaccharidoses	1	0	Yes	['adventitial cell', 'endothelial cell of lymphatic vessel', 'macrophage']	['alveolar macrophage']
607015	Hurler-scheie Syndrome	252800	IDUA	Idua	1	1	PS607014	Mucopolysaccharidoses	1	0	Yes	['adventitial cell', 'endothelial cell of lymphatic vessel', 'macrophage']	['alveolar macrophage']
607143	Congenital Disorder Of Glycosylation, Type Ig	607144	ALG12	Alg12	1	1	PS212065	Congenital disorders of glycosylation, type I	1	1	NA
607271	Autoimmune Lymphoproliferative Syndrome, Type Iib	601763	CASP8	Casp8	1	1			1	1	Yes
607594	Immunodeficiency, Common Variable, 1	604558	ICOS	Icos	1	1	PS607594	Immunodeficiency, common variable	1	0	Yes	['b cell']	['B cell']
607616	Niemann-pick Disease, Type B	607608	SMPD1	Smpd1	1	1			1	1	Yes
607944	Spondyloenchondrodysplasia With Immune Dysregulation	171640	ACP5		1	1	PS184255	Spondylometaphyseal dysplasia	1	0		['macrophage']
608022	Diaphanospondylodysostosis	608699	BMPER	Bmper	1	1			1	1	Yes	['pericyte cell']	['fibroblast']
608033	Necrotizing Encephalopathy, Acute, Autosomal Dominant	601181	RANBP2		1	1	PS610551	Encephalopathy, acute, infection-induced	1	0
608106	Immunodeficiency With Hyper-igm, Type 5	191525	UNG	Ung	1	1	PS308230	Immunodeficiency with hyper-IgM	1	0	Yes	['cd4-positive, alpha-beta t cell']
608233	Hermansky-pudlak Syndrome 2	603401	AP3B1	Ap3b1	1	1	PS203300	Hermansky-Pudlak syndrome	1	1	Yes		['alveolar macrophage']
608644	Ciliary Dyskinesia, Primary, 3, With Or Without Situs Inversus	603335	DNAH5	Dnah5	1	1	PS244400	Primary ciliary dyskinesia	1	0	Yes	['lung ciliated cell']	['ciliated epithelial cell']
608647	Ciliary Dyskinesia, Primary, 5	610812	HYDIN	Hydin	1	1	PS244400	Primary ciliary dyskinesia	1	1	Yes	['lung ciliated cell']	['ciliated epithelial cell']
608681	Spondylocostal Dysostosis 2, Autosomal Recessive	605195	MESP2	Mesp2	1	1	PS277300	Spondylocostal dysostosis	0	0
608957	Cd8 Deficiency, Familial	186910	CD8A	Cd8a	1	1			1	0		['cd8-positive, alpha-beta t cell']
608971	Severe Combined Immunodeficiency, Autosomal Recessive, T Cell-negative,b Cell-positive, Nk Cell-positive	151460	PTPRC	Ptprc	1	1			1	1	Yes	['cd4-positive, alpha-beta t cell']	['lymphocyte']
608971	Severe Combined Immunodeficiency, Autosomal Recessive, T Cell-negative,b Cell-positive, Nk Cell-positive	146661	IL7R	Il7r	1	1			1	1	Yes	['cd4-positive, alpha-beta t cell']	['lymphocyte']
609192	Loeys-dietz Syndrome, Type 1a Loeys-dietz Aortic Aneurysm Syndrome	190181	TGFBR1	Tgfbr1	1	1	PS607086	Aortic aneurysm, familial thoracic	1	1	No
609192	Loeys-dietz Syndrome, Type 1a Loeys-dietz Aortic Aneurysm Syndrome	190181	TGFBR1	Tgfbr1	1	1	PS609192	Loeys-Dietz syndrome	1	1	No
609529	Immunoglobulin A Deficiency 2	604907	TNFRSF13B	Tnfrsf13b	1	1			1	1	NA
609981	Natural Killer Cell And Glucocorticoid Deficiency With Dna Repairdefect	602638	MCM4	Mcm4	1	1	PS300755	Immunodeficiency (Select Examples)	1	1	Yes	['cd8-positive, alpha-beta t cell', 'nk cell']	['lymphocyte']
610015	Glutamine Deficiency, Congenital	138290	GLUL	Glul	1	1			1	1	NA
610163	Immunodeficiency 25	186780	CD247	Cd247	1	1	PS300755	Immunodeficiency (Select Examples)	1	1	Yes	['cd8-positive, alpha-beta t cell', 'nk cell']	['lymphocyte']
610168	Loeys-dietz Syndrome, Type 1b	190182	TGFBR2	Tgfbr2	1	1	PS607086	Aortic aneurysm, familial thoracic	1	1	No
610168	Loeys-dietz Syndrome, Type 1b	190182	TGFBR2	Tgfbr2	1	1	PS609192	Loeys-Dietz syndrome	1	1	No
610205	Alagille Syndrome 2	600275	NOTCH2	Notch2	1	1	PS118450	Alagille syndrome	1	1	No
610253	Kleefstra Syndrome	607001	EHMT1	Ehmt1	1	1	PS156200	Mental retardation, autosomal dominant	1	1	No
610253	Kleefstra Syndrome	607001	EHMT1	Ehmt1	1	1	PS610253	Kleefstra syndrome	1	1	No
610682	Osteogenesis Imperfecta, Type Vii	605497	CRTAP	Crtap	1	1	PS166200	Osteogenesis imperfecta	1	1	Yes		['fibroblast.1']
610798	Immunodeficiency Due To Defect In Mapbp-interacting Protein	610389	LAMTOR2	Lamtor2	1	1			1	1	Yes
610852	Ciliary Dyskinesia, Primary, 6	607421	NME8	Nme8	1	1	PS244400	Primary ciliary dyskinesia	1	0	Yes	['lung ciliated cell']	['ciliated epithelial cell']
610913	Surfactant Metabolism Dysfunction, Pulmonary, 2	178620	SFTPC	Sftpc	1	1	PS265120	Surfactant metabolism dysfunction, pulmonary	1	1	Yes	['type ii pneumocyte']	['pulmonary ionocyte; type II pneumocyte']
610921	Surfactant Metabolism Dysfunction, Pulmonary, 3	601615	ABCA3	Abca3	1	1	PS265120	Surfactant metabolism dysfunction, pulmonary	1	1	Yes	['type ii pneumocyte']	['pulmonary ionocyte; type II pneumocyte']
610978	Choreoathetosis, Hypothyroidism, And Neonatal Respiratory Distresschoreoathetosis And Congenital Hypothyroidism, Included	600635	NKX2-1	Nkx2-1	1	1			1	1	Yes
610984	Complement Factor I Deficiency	217030	CFI	Cfi	1	1			1	0
611521	Immunodeficiency 35	176941	TYK2	Tyk2	1	1	PS300755	Immunodeficiency (Select Examples)	1	1	Yes	['cd8-positive, alpha-beta t cell', 'nk cell']	['lymphocyte']
611812	46,xx Sex Reversal With Dysgenesis Of Kidneys, Adrenals, And Lungs	603490	WNT4	Wnt4	1	1			1	1	Yes
611884	Ciliary Dyskinesia, Primary, 7	603339	DNAH11	Dnah11	1	1	PS244400	Primary ciliary dyskinesia	1	0	Yes	['lung ciliated cell']	['ciliated epithelial cell']
611943	Riddle Syndrome	612688	RNF168	Rnf168	1	1			1	1	Yes
612132	Ectodermal Dysplasia, Anhidrotic, With T-cell Immunodeficiency, Autosomal	164008	NFKBIA	Nfkbia	1	1	PS300291	Ectodermal dysplasia and immune deficiency	1	1	Yes
612284	Meckel Syndrome, Type 6	612013	CC2D2A	Cc2d2a	1	1	PS249000	Meckel syndrome	1	1	NA
612289	Fontaine Progeroid Syndrome	608744	SLC25A24	Slc25a24	1	1			1	1	Yes
612301	Osteopetrosis, Autosomal Recessive 7	603499	TNFRSF11A	Tnfrsf11a	1	1	PS259700	Osteopetrosis, autosomal recessive	1	0		['endothelial cell of lymphatic vessel']
612387	Sarcoidosis, Susceptibility To, 2	606000	BTNL2	Btnl2	1	1			0	0
612444	Ciliary Dyskinesia, Primary, 9, With Or Without Situs Inversus	605483	DNAI2	Dnai2	1	1	PS244400	Primary ciliary dyskinesia	1	0	Yes	['lung ciliated cell']	['ciliated epithelial cell']
612518	Ciliary Dyskinesia, Primary, 10	612517	DNAAF2	Dnaaf2	1	1	PS244400	Primary ciliary dyskinesia	1	0	Yes	['lung ciliated cell']	['ciliated epithelial cell']
612541	Neutropenia, Severe Congenital, 4, Autosomal Recessive	611045	G6PC3	G6pc3	1	1	PS202700	Neutropenia, severe congenital	1	1	Yes
612649	Ciliary Dyskinesia, Primary, 11	612647	RSPH4A	Rsph4a	1	1	PS244400	Primary ciliary dyskinesia	1	1	Yes	['lung ciliated cell']	['ciliated epithelial cell']
612650	Ciliary Dyskinesia, Primary, 12	612648	RSPH9	Rsph9	1	1	PS244400	Primary ciliary dyskinesia	1	1	Yes	['lung ciliated cell']	['ciliated epithelial cell']
612692	Agammaglobulinemia 6, Autosomal Recessive	147245	CD79B	Cd79b	1	1	PS601495	Agammaglobulinemia	1	1	Yes	['b cell']	['B cell']
612852	Interleukin 1 Receptor Antagonist Deficiency	147679	IL1RN	Il1rn	1	1			1	1	Yes	['neutrophil']
613011	Lymphoproliferative Syndrome 1	186973	ITK	Itk	1	1	PS308240	Lymphoproliferative syndrome	1	1	NA	['cd8-positive, alpha-beta t cell']	['lymphocyte']
613021	Bronchiectasis With Or Without Elevated Sweat Chloride 2	600228	SCNN1A	Scnn1a	1	1	PS211400	Bronchiectasis	1	1	Yes	['club cell', 'pulmonary ionocyte', 'respiratory mucous cell']	['pulmonary ionocyte; type II pneumocyte']
613071	Bronchiectasis With Or Without Elevated Sweat Chloride 3	600761	SCNN1G	Scnn1g	1	1	PS211400	Bronchiectasis	1	0	Yes	['club cell', 'pulmonary ionocyte', 'respiratory mucous cell']	['pulmonary ionocyte; type II pneumocyte']
613101	Hemophagocytic Lymphohistiocytosis, Familial, 5	601717	STXBP2	Stxbp2	1	1	PS267700	Hemophagocytic lymphohistiocytosis, familial	1	1	No
613177	Cutis Laxa With Severe Pulmonary, Gastrointestinal, And Urinary Abnormalities	604710	LTBP4	Ltbp4	1	1	PS123700	Cutis laxa	1	1	Yes	['adventitial cell', 'alveolar fibroblast', 'bronchial smooth muscle cell', 'vascular associated smooth muscle cell']	['fibroblast', 'fibroblast.1']
613179	Immunodeficiency Due To Purine Nucleoside Phosphorylase Deficiency	164050	PNP	Pnp	1	1			1	1	Yes	['bronchial vessel endothelial cell']
613179	Immunodeficiency Due To Purine Nucleoside Phosphorylase Deficiency	164050	PNP	Pnp2	1	1			1	0	Yes	['bronchial vessel endothelial cell']
613193	Ciliary Dyskinesia, Primary, 13	613190	DNAAF1	Dnaaf1	1	1	PS244400	Primary ciliary dyskinesia	1	0	Yes	['lung ciliated cell']	['ciliated epithelial cell']
613254	Tuberous Sclerosis-2	147570	IFNG	Ifng	1	1	PS191100	Tuberous sclerosis	1	1	Yes
613254	Tuberous Sclerosis-2	191092	TSC2	Tsc2	1	1	PS191100	Tuberous sclerosis	1	1	Yes
613385	Autoimmune Disease, Multisystem, With Facial Dysmorphism	606409	ITCH	Itch	1	1			1	1	Yes
613426	Cardiomyopathy, Dilated, 1s	160760	MYH7	Myh7	1	1	PS115200	Dilated cardiomyopathy	0	1	No
613426	Cardiomyopathy, Dilated, 1s	160760	MYH7	Myh7	1	1	PS604169	Left ventricular noncompaction	0	1	No
613489	Congenital Disorder Of Glycosylation, Type Iij	606976	COG4	Cog4	1	1	PS212066	Congenital disorders of glycosylation, type II	1	1	NA
613490	Alpha-1-antitrypsin Deficiency	107400	SERPINA1	Serpina1e	1	1			1	0
613490	Alpha-1-antitrypsin Deficiency	107400	SERPINA1	Serpina1c	1	1			1	0
613490	Alpha-1-antitrypsin Deficiency	107400	SERPINA1	Serpina1d	1	1			1	0
613490	Alpha-1-antitrypsin Deficiency	107400	SERPINA1	Serpina1b	1	1			1	0
613490	Alpha-1-antitrypsin Deficiency	107400	SERPINA1	Serpina1a	1	1			1	1	Yes
613493	Immunodeficiency, Common Variable, 3	107265	CD19	Cd19	1	1	PS607594	Immunodeficiency, common variable	1	1	Yes	['b cell']	['B cell']
613494	Immunodeficiency, Common Variable, 4	606269	TNFRSF13C	Tnfrsf13c	1	1	PS607594	Immunodeficiency, common variable	1	1	Yes	['b cell']	['B cell']
613495	Immunodeficiency, Common Variable, 5	112210	MS4A1	Ms4a1	1	1	PS607594	Immunodeficiency, common variable	1	1	Yes	['b cell']	['B cell']
613496	Immunodeficiency, Common Variable, 6	186845	CD81	Cd81	1	1	PS607594	Immunodeficiency, common variable	1	1	Yes	['b cell']	['B cell']
613500	Agammaglobulinemia 2, Autosomal Recessive	146770	IGLL1	Igll1	1	1	PS601495	Agammaglobulinemia	0	0	Yes	['b cell']	['B cell']
613501	Agammaglobulinemia 3, Autosomal Recessive	112205	CD79A	Cd79a	1	1	PS601495	Agammaglobulinemia	1	1	Yes	['b cell']	['B cell']
613502	Agammaglobulinemia 4, Autosomal Recessive	604515	BLNK	Blnk	1	1	PS601495	Agammaglobulinemia	1	1	Yes	['b cell']	['B cell']
613563	Noonan Syndrome-like Disorder With Or Without Juvenile Myelomonocyticleukemia	165360	CBL	Cbl	1	1			1	1	NA
613658	Rajab Interstitial Lung Disease With Brain Calcifications	609690	FARSB	Farsb	1	1	PS613658	Rajab interstitial lung disease with brain calcifications	1	1	Yes
613759	Infections, Recurrent, With Encephalopathy, Hepatic Dysfunction, And Cardiovascular Malformations	602457	FADD	Fadd	1	1			1	1	NA
613791	Masp2 Deficiency	605102	MASP2	Masp2	1	1	PS614372	Lectin complement activation pathway defects	0	0		['capillary endothelial cell']
613795	Loeys-dietz Syndrome, Type 3	603109	SMAD3	Smad3	1	1	PS609192	Loeys-Dietz syndrome	1	1	No
613803	Meier-gorlin Syndrome 3	607213	ORC6	Orc6	1	1	PS224690	Meier-Gorlin syndrome	0	1	Yes
613804	Meier-gorlin Syndrome 4	605525	CDT1	Cdt1	1	1	PS224690	Meier-Gorlin syndrome	1	1	Yes
613807	Ciliary Dyskinesia, Primary, 14	613798	CCDC39	Ccdc39	1	1	PS244400	Primary ciliary dyskinesia	1	1	Yes	['lung ciliated cell']	['ciliated epithelial cell']
613808	Ciliary Dyskinesia, Primary, 15	613799	CCDC40	Ccdc40	1	1	PS244400	Primary ciliary dyskinesia	1	1	Yes	['lung ciliated cell']	['ciliated epithelial cell']
613848	Osteogenesis Imperfecta, Type X	600943	SERPINH1	Serpinh1	1	1	PS166200	Osteogenesis imperfecta	1	1	Yes		['fibroblast.1']
613854	Congenital Heart Defects, Multiple Types, 6	602880	GDF1	Gdf1	1	1			0	0
613860	Immunodeficiency Due To Ficolin 3 Deficiency	604973	FCN3		1	1	PS614372	Lectin complement activation pathway defects	1	0		['capillary endothelial cell']
613953	Immunodeficiency 51	605461	IL17RA	Il17ra	1	1	PS300755	Immunodeficiency (Select Examples)	1	1	Yes	['cd8-positive, alpha-beta t cell', 'nk cell']	['lymphocyte']
613960	Granulomatous Disease, Chronic, Autosomal Recessive, Cytochrome B-positive,type Iii	601488	NCF4	Ncf4	1	1	PS306400	Granulomatous disease, chronic	1	1	Yes	['classical monocyte', 'intermediate monocyte', 'macrophage', 'neutrophil', 'plasmacytoid dendritic cell']	['neutrophil', 'classical monocyte', 'non-classical monocyte']
613989	Dyskeratosis Congenita, Autosomal Dominant, 2	187270	TERT	Tert	1	1	PS127550	Dyskeratosis congenita	0	0	Yes
613990	Dyskeratosis Congenita, Autosomal Dominant, 3	604319	TINF2	Tinf2	1	1	PS127550	Dyskeratosis congenita	1	0	Yes
614069	Immunodeficiency-centromeric Instability-facial Anomalies Syndrome2	614064	ZBTB24	Zbtb24	1	1	PS242860	Immunodeficiency-centromeric instability-facial anomalies	1	1	Yes
614073	Hermansky-pudlak Syndrome 4	606682	HPS4	Hps4	1	1	PS203300	Hermansky-Pudlak syndrome	1	1	Yes		['alveolar macrophage']
614075	Hermansky-pudlak Syndrome 6	607522	HPS6	Hps6	1	1	PS203300	Hermansky-Pudlak syndrome	1	0			['alveolar macrophage']
614080	Multiple Congenital Anomalies-hypotonia-seizures Syndrome 1	606097	PIGN	Pign	1	1	PS614080	Multiple congenital anomalies-hypotonia-seizures syndrome	1	1	Yes
614091	Short-rib Thoracic Dysplasia 7 With Or Without Polydactyly	613602	WDR35	Wdr35	1	1	PS208500	Short-rib thoracic dysplasia	1	1	Yes	['lung ciliated cell']	['ciliated epithelial cell']
614096	Combined Oxidative Phosphorylation Deficiency 8	612035	AARS2	Aars2	1	1	PS609060	Combined oxidative phosphorylation deficiency	1	1	NA
614099	Cranioectodermal Dysplasia 3	614068	IFT43	Ift43	1	1	PS218330	Cranioectodermal dysplasia	1	0		['lung ciliated cell']
614114	Mosaic Variegated Aneuploidy Syndrome 2	607951	CEP57	Cep57	1	1	PS257300	Mosaic variegated aneuploidy syndrome	1	1	Yes
614162	Immunodeficiency 31c	600555	STAT1	Stat1	1	1	PS114580	Familial candidiasis	1	1	Yes
614162	Immunodeficiency 31c	600555	STAT1	Stat1	1	1	PS300755	Immunodeficiency (Select Examples)	1	1	Yes	['cd8-positive, alpha-beta t cell', 'nk cell']	['lymphocyte']
614231	Microcephaly, Epilepsy, And Diabetes Syndrome	609382	IER3IP1	Ier3ip1	1	1			1	1	NA
614327	Tumor Predisposition Syndrome	603089	BAP1	Bap1	1	1			1	1	Yes
614370	Surfactant Metabolism Dysfunction, Pulmonary, 5	138981	CSF2RB	Csf2rb2	1	1	PS265120	Surfactant metabolism dysfunction, pulmonary	1	1	Yes	['type ii pneumocyte']	['pulmonary ionocyte; type II pneumocyte']
614370	Surfactant Metabolism Dysfunction, Pulmonary, 5	138981	CSF2RB	Csf2rb	1	1	PS265120	Surfactant metabolism dysfunction, pulmonary	1	1	Yes	['type ii pneumocyte']	['pulmonary ionocyte; type II pneumocyte']
614378	Cranioectodermal Dysplasia 4	608151	WDR19	Wdr19	1	1	PS218330	Cranioectodermal dysplasia	1	1	Yes	['lung ciliated cell']
614432	Ventricular Septal Defect 3	600584	NKX2-5	Nkx2-5	1	1	PS614429	Ventricular septal defect	0	0
614433	Atrial Septal Defect 8	602937	CITED2	Cited2	1	1	PS108800	Atrial septal defect	1	1	No
614437	Cutis Laxa, Autosomal Recessive, Type Ib	604633	EFEMP2	Efemp2	1	1	PS123700	Cutis laxa	1	1	Yes	['adventitial cell', 'alveolar fibroblast', 'bronchial smooth muscle cell', 'vascular associated smooth muscle cell']	['fibroblast', 'fibroblast.1']
614468	Familial Cold Autoinflammatory Syndrome 3	600220	PLCG2	Plcg2	1	1	PS120100	Familial cold autoinflammatory syndrome	1	1	No
614470	Ras-associated Autoimmune Lymphoproliferative Syndrome Type Iv, Somatic	190070	KRAS	Kras	1	1			1	1	NA
614679	Ciliary Dyskinesia, Primary, 17	614677	CCDC103	Ccdc103	1	1	PS244400	Primary ciliary dyskinesia	0	1	Yes	['lung ciliated cell']	['ciliated epithelial cell']
614699	Immunodeficiency, Common Variable, 7	120650	CR2	Cr2	1	1	PS607594	Immunodeficiency, common variable	0	1	Yes	['b cell']	['B cell']
614700	Immunodeficiency, Common Variable, 8, With Autoimmunity	606453	LRBA	Lrba	1	1	PS607594	Immunodeficiency, common variable	1	1	Yes	['b cell']	['B cell']
614742	Pulmonary Fibrosis And/or Bone Marrow Failure, Telomere-related, 1	187270	TERT	Tert	1	1	PS614742	Pulmonary fibrosis and/or bone marrow failure, telomere-related	0	0
614743	Pulmonary Fibrosis And/or Bone Marrow Failure, Telomere-related, 2	602322	TERC		1	1	PS614742	Pulmonary fibrosis and/or bone marrow failure, telomere-related	0	0
614748	Interstitial Lung Disease, Nephrotic Syndrome, And Epidermolysis Bullosa, Congenital	605025	ITGA3	Itga3	1	1			1	1	Yes		['capillary endothelial cell']
614816	Loeys-dietz Syndrome, Type 4	190220	TGFB2	Tgfb2	1	1	PS609192	Loeys-Dietz syndrome	1	1	No
614874	Ciliary Dyskinesia, Primary, 18	614864	DNAAF5	Dnaaf5	1	1	PS244400	Primary ciliary dyskinesia	1	0	Yes	['lung ciliated cell']	['ciliated epithelial cell']
614878	Autoinflammation, Antibody Deficiency, And Immune Dysregulation, Plcg2-associated	600220	PLCG2	Plcg2	1	1			1	1	Yes
614885	Peroxisome Biogenesis Disorder 11b	601789	PEX13	Pex13	1	1	PS214100	Peroxisome biogenesis disorder	1	1	No
614935	Ciliary Dyskinesia, Primary, 19	614930	DNAAF11	Lrrc6	1	1	PS244400	Primary ciliary dyskinesia	0	1	Yes	['lung ciliated cell']	['ciliated epithelial cell']
614941	Ectodermal Dysplasia 11b, Hypohidrotic/hair/tooth Type, Autosomal Recessive	606603	EDARADD	Edaradd	1	1	PS305100	Ectodermal dysplasia (select examples)	1	1	NA
614962	Leptin Deficiency Or Dysfunction	164160	LEP	Lep	1	1			0	0
614963	Leptin Receptor Deficiency	601007	LEPR	Lepr	1	1			1	1	No
615067	Ciliary Dyskinesia, Primary, 20	615038	ODAD1	Odad1	1	1	PS244400	Primary ciliary dyskinesia	0	0	Yes	['lung ciliated cell']	['ciliated epithelial cell']
615122	Lymphoproliferative Syndrome 2	186711	CD27	Cd27	1	1	PS308240	Lymphoproliferative syndrome	1	1	No	['cd8-positive, alpha-beta t cell']	['lymphocyte']
615139	Facial Dysmorphism, Immunodeficiency, Livedo, And Short Stature	174762	POLE	Pole	1	1			1	0
615206	Card11 Immunodeficiency	607210	CARD11	Card11	1	1	PS300755	Immunodeficiency (Select Examples)	1	1	Yes	['cd8-positive, alpha-beta t cell', 'nk cell']	['lymphocyte']
615207	Il21r Immunodeficiency	605383	IL21R	Il21r	1	1	PS300755	Immunodeficiency (Select Examples)	1	1	Yes	['cd8-positive, alpha-beta t cell', 'nk cell']	['lymphocyte']
615214	Agammaglobulinemia 7, Autosomal Recessive	171833	PIK3R1	Pik3r1	1	1	PS601495	Agammaglobulinemia	1	1	Yes	['b cell']	['B cell']
615228	Mitochondrial Complex V (atp Synthase) Deficiency, Nuclear Type 4	164360	ATP5F1A	Atp5a1	1	1	PS604273	Mitochondrial complex V (ATP synthase) deficiency, nuclear type	1	1	Yes
615273	Congenital Disorder Of Deglycosylation	610661	NGLY1	Ngly1	1	1			1	1	No
615294	Ciliary Dyskinesia, Primary, 21	615288	DRC1	Drc1	1	1	PS244400	Primary ciliary dyskinesia	1	0	Yes	['lung ciliated cell']	['ciliated epithelial cell']
615355	Noonan Syndrome 8	609591	RIT1	Rit1	1	1	PS163950	Noonan syndrome	1	1	No
615401	Immunodeficiency 8	605000	CORO1A	Coro1a	1	1	PS300755	Immunodeficiency (Select Examples)	1	1	Yes	['cd8-positive, alpha-beta t cell', 'nk cell']	['lymphocyte']
615415	Renal-hepatic-pancreatic Dysplasia 2	609799	NEK8	Nek8	1	1	PS208540	Renal-hepatic-pancreatic dysplasia	0	0
615444	Ciliary Dyskinesia, Primary, 22	607070	ZMYND10	Zmynd10	1	1	PS244400	Primary ciliary dyskinesia	1	1	Yes	['lung ciliated cell']	['ciliated epithelial cell']
615451	Ciliary Dyskinesia, Primary, 23	615408	ODAD2	Odad2	1	1	PS244400	Primary ciliary dyskinesia	0	0	Yes	['lung ciliated cell']	['ciliated epithelial cell']
615481	Ciliary Dyskinesia, Primary, 24	609314	RSPH1	Rsph1	1	1	PS244400	Primary ciliary dyskinesia	1	1	Yes	['lung ciliated cell']	['ciliated epithelial cell']
615482	Ciliary Dyskinesia, Primary, 25	608706	DNAAF4	Dnaaf4	1	1	PS244400	Primary ciliary dyskinesia	1	0	Yes	['lung ciliated cell']	['ciliated epithelial cell']
615486	Interstitial Lung And Liver Disease	156560	MARS1	Mars1	1	1			0	0
615500	Ciliary Dyskinesia, Primary, 26	615494	CFAP298	Cfap298	1	1	PS244400	Primary ciliary dyskinesia	1	0	Yes	['lung ciliated cell']	['ciliated epithelial cell']
615503	Short-rib Thoracic Dysplasia 8 With Or Without Polydactyly	615462	DYNC2I1	Dync2i1	1	1	PS208500	Short-rib thoracic dysplasia	0	0	Yes	['lung ciliated cell']	['ciliated epithelial cell']
615504	Ciliary Dyskinesia, Primary, 27	611088	CCDC65	Ccdc65	1	1	PS244400	Primary ciliary dyskinesia	1	1	Yes	['lung ciliated cell']	['ciliated epithelial cell']
615505	Ciliary Dyskinesia, Primary, 28	603395	SPAG1	Spag1	1	1	PS244400	Primary ciliary dyskinesia	1	1	Yes	['lung ciliated cell']	['ciliated epithelial cell']
615508	Erythroderma, Congenital, With Palmoplantar Keratoderma, Hypotrichosis, And Hyper-ige	125670	DSG1	Dsg1a	1	1			0	0
615508	Erythroderma, Congenital, With Palmoplantar Keratoderma, Hypotrichosis, And Hyper-ige	125670	DSG1	Dsg1b	1	1			0	0
615513	Immunodeficiency 14	602839	PIK3CD	Pik3cd	1	1	PS300755	Immunodeficiency (Select Examples)	1	1	Yes	['cd8-positive, alpha-beta t cell', 'nk cell']	['lymphocyte']
615518	Immunodeficiency 13	604011	UNC119	Unc119	1	1	PS300755	Immunodeficiency (Select Examples)	1	1	Yes	['cd8-positive, alpha-beta t cell', 'nk cell']	['lymphocyte']
615524	Microphthalmia, Syndromic 12	180220	RARB	Rarb	1	1	PS309800	Microphthalmia, syndromic	1	0	Yes
615559	Autoimmune Lymphoproliferative Syndrome, Type Iii	176977	PRKCD	Prkcd	1	1			1	1	NA
615561	Complement Factor B Deficiency	138470	CFB	Cfb	1	1			1	1	NA
615577	Immunodeficiency, Common Variable, 10	164012	NFKB2	Nfkb2	1	1	PS607594	Immunodeficiency, common variable	1	1	Yes	['b cell']	['B cell']
615592	Immunodeficiency 15	603258	IKBKB	Ikbkb	1	1	PS300755	Immunodeficiency (Select Examples)	1	1	Yes	['cd8-positive, alpha-beta t cell', 'nk cell']	['lymphocyte']
615607	Immunodeficiency 17	186740	CD3G	Cd3g	1	1	PS300755	Immunodeficiency (Select Examples)	1	1	Yes	['cd8-positive, alpha-beta t cell', 'nk cell']	['lymphocyte']
615615	Immunodeficiency 18	186830	CD3E	Cd3e	1	1	PS300755	Immunodeficiency (Select Examples)	1	1	Yes	['cd8-positive, alpha-beta t cell', 'nk cell']	['lymphocyte']
615617	Immunodeficiency 19	186790	CD3D	Cd3d	1	1	PS300755	Immunodeficiency (Select Examples)	1	1	Yes	['cd8-positive, alpha-beta t cell', 'nk cell']	['lymphocyte']
615633	Short-rib Thoracic Dysplasia 11 With Or Without Polydactyly	613363	DYNC2I2	Dync2i2	1	1	PS208500	Short-rib thoracic dysplasia	0	0	Yes	['lung ciliated cell']	['ciliated epithelial cell']
615636	Joubert Syndrome 21	611654	CSPP1	Cspp1	1	1	PS213300	Joubert syndrome	1	1	Yes
615688	Vasculitis, Autoinflammation, Immunodeficiency, And Hematologic Defects Syndrome	607575	ADA2		1	1			1	0		['classical monocyte', 'intermediate monocyte', 'non-classical monocyte']
615704	Poikiloderma, Hereditary Fibrosing, With Tendon Contractures, Myopathy,and Pulmonary Fibrosis	615584	FAM111B		1	1			0	0
615707	Immunodeficiency 20	146740	FCGR3A	Fcgr4	1	1	PS300755	Immunodeficiency (Select Examples)	1	1	Yes	['cd8-positive, alpha-beta t cell', 'nk cell']	['lymphocyte']
615721	Renal Hypodysplasia/aplasia 2	605558	FGF20	Fgf20	1	1	PS191830	Renal hypodysplasia/aplasia	0	0			['fibroblast']
615758	Immunodeficiency 22	153390	LCK	Lck	1	1	PS300755	Immunodeficiency (Select Examples)	1	1	Yes	['cd8-positive, alpha-beta t cell', 'nk cell']	['lymphocyte']
615767	Immunodeficiency, Common Variable, 11	605384	IL21	Il21	1	1	PS607594	Immunodeficiency, common variable	0	0	Yes	['b cell']	['B cell']
615816	Immunodeficiency 23	172100	PGM3	Pgm3	1	1	PS300755	Immunodeficiency (Select Examples)	1	1	Yes	['cd8-positive, alpha-beta t cell', 'nk cell']	['lymphocyte']
615872	Ciliary Dyskinesia, Primary, 29	607752	CCNO	Ccno	1	1	PS244400	Primary ciliary dyskinesia	1	0	Yes	['lung ciliated cell']	['ciliated epithelial cell']
615897	Immunodeficiency 24	123860	CTPS1	Ctps	1	1	PS300755	Immunodeficiency (Select Examples)	1	0	Yes	['cd8-positive, alpha-beta t cell', 'nk cell']	['lymphocyte']
615934	Sting-associated Vasculopathy, Infantile-onset	612374	STING1	Sting1	1	1			0	0
615952	Autoimmune Disease, Multisystem, Infantile-onset, 1	102582	STAT3	Stat3	1	1	PS615952	Autoimmune disease, multisystem, infantile-onset	1	1	Yes
615966	Immunodeficiency 26 With Or Without Neurologic Abnormalities	600899	PRKDC	Prkdc	1	1	PS300755	Immunodeficiency (Select Examples)	1	0	Yes	['cd8-positive, alpha-beta t cell', 'nk cell']	['lymphocyte']
615993	Bardet-biedl Syndrome 16	613524	SDCCAG8	Sdccag8	1	1	PS209900	Bardet-Biedl syndrome	1	1	Yes
616005	Immunodeficiency 36	171833	PIK3R1	Pik3r1	1	1	PS300755	Immunodeficiency (Select Examples)	1	1	Yes	['cd8-positive, alpha-beta t cell', 'nk cell']	['lymphocyte']
616006	Hennekam Lymphangiectasia-lymphedema Syndrome 2	612411	FAT4	Fat4	1	1	PS235510	Hennekam lymphangiectasia-lymphedema syndrome	1	0		['alveolar fibroblast']
616022	Neutropenia, Severe Congenital, 6, Autosomal Recessive	616012	JAGN1	Jagn1	1	1	PS202700	Neutropenia, severe congenital	1	1	Yes
616037	Ciliary Dyskinesia, Primary, 30	615956	ODAD3	Odad3	1	1	PS244400	Primary ciliary dyskinesia	0	0	Yes	['lung ciliated cell']	['ciliated epithelial cell']
616050	Autoinflammation With Infantile Enterocolitis	606831	NLRC4	Nlrc4	1	1			1	0
616069	Inflammatory Skin And Bowel Disease, Neonatal, 2	131550	EGFR	Egfr	1	1	PS614328	Neonatal inflammatory skin and bowel disease	1	1	Yes
616100	Autoimmune Lymphoproliferative Syndrome, Type V	123890	CTLA4	Ctla4	1	1			1	0		['cd8-positive, alpha-beta t cell', 'cd4-positive, alpha-beta t cell']
616260	Tenorio Syndrome	610432	RNF125		1	1			1	0
616300	Short-rib Thoracic Dysplasia 13 With Or Without Polydactyly	613446	CEP120	Cep120	1	1	PS208500	Short-rib thoracic dysplasia	1	1	Yes	['lung ciliated cell']	['ciliated epithelial cell']
616368	Chops Syndrome	604417	AFF4	Aff4	1	1			1	1	Yes
616371	Pulmonary Fibrosis And/or Bone Marrow Failure, Telomere-related, 4	604212	PARN	Parn	1	1	PS614742	Pulmonary fibrosis and/or bone marrow failure, telomere-related	1	1	Yes
616373	Pulmonary Fibrosis And/or Bone Marrow Failure, Telomere-related, 3	608833	RTEL1	Rtel1	1	1	PS614742	Pulmonary fibrosis and/or bone marrow failure, telomere-related	0	0	Yes
616414	Autoimmune Interstitial Lung, Joint, And Kidney Disease	601924	COPA	Copa	1	1			1	1	Yes
616481	Ciliary Dyskinesia, Primary, 32	615876	RSPH3	Rsph3a	1	1	PS244400	Primary ciliary dyskinesia	1	1	Yes	['lung ciliated cell']	['ciliated epithelial cell']
616481	Ciliary Dyskinesia, Primary, 32	615876	RSPH3	Rsph3b	1	1	PS244400	Primary ciliary dyskinesia	1	1	Yes	['lung ciliated cell']	['ciliated epithelial cell']
616503	*616503 Lethal Congenital Contracture Syndrome 9	612243	ADGRG6	Adgrg6	1	1	PS253310	Lethal congenital contracture syndrome	1	0	Yes
616546	Short-rib Thoracic Dysplasia 14 With Polydactyly	610178	KIAA0586	2700049A03Rik	1	1	PS208500	Short-rib thoracic dysplasia	1	1	Yes	['lung ciliated cell']	['ciliated epithelial cell']
616576	Immunodeficiency, Common Variable, 12	164011	NFKB1	Nfkb1	1	1	PS607594	Immunodeficiency, common variable	1	1	Yes	['b cell']	['B cell']
616579	Mental Retardation, Autosomal Dominant 40	616327	CHAMP1	Champ1	1	1	PS156200	Mental retardation, autosomal dominant	1	0	Yes
616651	Roifman Syndrome	601428	RNU4ATAC		1	1			0	0
616720	Myasthenic Syndrome, Congenital, 19	120350	COL13A1	Col13a1	1	1	PS601462	Myasthenic syndrome, congenital	1	1	Yes	['alveolar fibroblast']	['fibroblast']
616726	Ciliary Dyskinesia, Primary, 33	605178	GAS8	Gas8	1	1	PS244400	Primary ciliary dyskinesia	1	1	Yes	['lung ciliated cell']	['ciliated epithelial cell']
616733	Coenzyme Q10 Deficiency, Primary, 8	601683	COQ7	Coq7	1	1	PS607426	Coenzyme Q10 deficiency, primary	1	1	Yes
616740	Immunodeficiency 46	190010	TFRC	Tfrc	1	1	PS300755	Immunodeficiency (Select Examples)	1	1	Yes	['cd8-positive, alpha-beta t cell', 'nk cell']	['lymphocyte']
616749	Heterotaxy, Visceral, 7, Autosomal	608416	MMP21	Mmp21	1	1	PS306955	Heterotaxy, visceral	0	0
616777	Seckel Syndrome 9	605958	TRAIP	Traip	1	1	PS210600	Seckel syndrome	1	1	NA
616784	Joubert Syndrome 26	616650	KATNIP	Katnip	1	1	PS213300	Joubert syndrome	0	0
616835	Meier-gorlin Syndrome 6	602842	GMNN	Gmnn	1	1	PS224690	Meier-Gorlin syndrome	1	1	Yes
616843	Lymphedema, Hereditary, Iii	611184	PIEZO1	Piezo1	1	1	PS153100	Lymphatic malformation	1	0		['bronchial vessel endothelial cell', 'capillary aerocyte', 'capillary endothelial cell', 'endothelial cell of artery', 'endothelial cell of lymphatic vessel', 'lung microvascular endothelial cell', 'vein endothelial cell']	['pulmonary artery endothelial cell']
616866	Spinal Muscular Atrophy With Congenital Bone Fractures 1	604501	TRIP4	Trip4	1	1	PS616866	Spinal muscular atrophy with congenital bone fractures	1	1	Yes
616867	Spinal Muscular Atrophy With Congenital Bone Fractures 2	614215	ASCC1	Ascc1	1	1	PS616866	Spinal muscular atrophy with congenital bone fractures	1	1	Yes
616894	Robinow Syndrome, Autosomal Dominant 3	601368	DVL3	Dvl3	1	1	PS268310	Robinow syndrome	1	0
616897	Osteochondrodysplasia, Complex Lethal, Symoens-barnes-gistelinck Type	612758	TAPT1	Tapt1	1	1			1	1	Yes
617022	Lethal Congenital Contracture Syndrome 10	609798	NEK9	Nek9	1	1	PS253310	Lethal congenital contracture syndrome	1	1	Yes
617050	Hermansky-pudlak Syndrome 10	607246	AP3D1	Ap3d1	1	1	PS203300	Hermansky-Pudlak syndrome	1	1	Yes		['alveolar macrophage']
617053	Mirage Syndrome	610456	SAMD9		1	1			1	0
617063	Meier-gorlin Syndrome 7	603465	CDC45	Cdc45	1	1	PS224690	Meier-Gorlin syndrome	0	0
617091	Ciliary Dyskinesia, Primary, 34	610263	DNAJB13	Dnajb13	1	1	PS244400	Primary ciliary dyskinesia	1	1	Yes	['lung ciliated cell']	['ciliated epithelial cell']
617092	Ciliary Dyskinesia, Primary, 35	617095	ODAD4	Odad4	1	1	PS244400	Primary ciliary dyskinesia	0	0	Yes	['lung ciliated cell']	['ciliated epithelial cell']
617175	Retinal Dystrophy With Or Without Extraocular Anomalies	607867	RCBTB1	Rcbtb1	1	1			1	1	Yes
617180	Chitayat Syndrome	611888	ERF	Erf	1	1			1	1	Yes
617194	Lethal Congenital Contracture Syndrome 11	608603	GLDN	Gldn	1	1	PS253310	Lethal congenital contracture syndrome	1	0
617205	Heterotaxy, Visceral, 8, Autosomal	609721	PKD1L1	Pkd1l1	1	1	PS306955	Heterotaxy, visceral	0	0
617237	Immunodeficiency 49	606558	BCL11B	Bcl11b	1	1	PS300755	Immunodeficiency (Select Examples)	1	1	Yes	['cd8-positive, alpha-beta t cell', 'nk cell']	['lymphocyte']
617241	Lung Disease, Immunodeficiency, And Chromosome Breakage Syndrome	608243	NSMCE3	Nsmce3	1	1			1	0
617258	Myopathy, Myofibrillar, 8	617220	PYROXD1	Pyroxd1	1	1	PS601419	Myopathy, myofibrillar	1	1	Yes
617300	Hydrops Fetalis, Nonimmune, And/or Atrial Septal Defect, Susceptibility To	600011	EPHB4	Ephb4	1	1	PS153100	Lymphatic malformation	1	1	Yes	['bronchial vessel endothelial cell', 'capillary aerocyte', 'capillary endothelial cell', 'endothelial cell of artery', 'endothelial cell of lymphatic vessel', 'lung microvascular endothelial cell', 'vein endothelial cell']	['pulmonary artery endothelial cell']
617303	Mucopolysaccharidosis-plus Syndrome	610034	VPS33A	Vps33a	1	1			1	1	NA
617321	Yao Syndrome	605956	NOD2	Nod2	1	1			1	0		['classical monocyte', 'intermediate monocyte']
617402	Cutis Laxa, Autosomal Recessive, Type Iic	108746	ATP6V1E1	Atp6v1e1	1	1	PS123700	Cutis laxa	1	1	Yes	['adventitial cell', 'alveolar fibroblast', 'bronchial smooth muscle cell', 'vascular associated smooth muscle cell']	['fibroblast', 'fibroblast.1']
617468	Arthrogryposis Multiplex Congenita, Neurogenic, With Myelin Defect	608303	LGI4	Lgi4	1	1	PS617468	Arthrogryposis multiplex congenita	1	1	Yes
617475	Specific Granule Deficiency 2	601736	SMARCD2	Smarcd2	1	1	PS245480	Specific granule deficiency	1	1	Yes
617478	Structural Heart Defects And Renal Anomalies Syndrome	617449	TMEM260	Tmem260	1	1			1	0
617506	Noonan Syndrome-like Disorder With Loose Anagen Hair 2	600590	PPP1CB	Ppp1cb	1	1	PS163950	Noonan syndrome	1	1	No
617506	Noonan Syndrome-like Disorder With Loose Anagen Hair 2	600590	PPP1CB	Ppp1cb	1	1	PS607721	Noonan syndrome-like disorder with loose anagen hair	1	1	No
617514	Immunodeficiency 52	602354	LAT	Lat	1	1	PS300755	Immunodeficiency (Select Examples)	0	1	Yes	['cd8-positive, alpha-beta t cell', 'nk cell']	['lymphocyte']
617585	Immunodeficiency 53	604758	RELB	Relb	1	1	PS300755	Immunodeficiency (Select Examples)	1	1	Yes	['cd8-positive, alpha-beta t cell', 'nk cell']	['lymphocyte']
617602	Congenital Heart Defects And Skeletal Malformations Syndrome	189980	ABL1	Abl1	1	1			1	1	Yes
617638	Immunodeficiency 11b With Atopic Dermatitis	607210	CARD11	Card11	1	1	PS300755	Immunodeficiency (Select Examples)	1	1	Yes	['cd8-positive, alpha-beta t cell', 'nk cell']	['lymphocyte']
617667	Fraser Syndrome 3	604597	GRIP1	Grip1	1	1	PS219000	Fraser syndrome	1	0	Yes	['mesothelial cell']
617695	Pontocerebellar Hypoplasia, Type 11	617687	TBC1D23	Tbc1d23	1	1	PS607596	Pontocerebellar hypoplasia	1	1	No
617744	Immunodeficiency, Developmental Delay, And Hypohomocysteinemia	600492	NFE2L2	Nfe2l2	1	1			1	1	NA
617780	Combined Immunodeficiency And Megaloblastic Anemia With Or Without Hyperhomocysteinemia	172460	MTHFD1	Mthfd1	1	1			1	1	Yes
617809	Geleophysic Dysplasia 3	602090	LTBP3	Ltbp3	1	1	PS231050	Geleophysic dysplasia	1	1	Yes		['myofibroblast cell']
617895	Short-rib Thoracic Dysplasia-19 With Or Without Polydactyly (srtd19)	605489	IFT81	Ift81	1	1	PS208500	Short-rib thoracic dysplasia	1	1	Yes	['lung ciliated cell']	['ciliated epithelial cell']
617925	Short-rib Throacic Dysplasia 20 With Polydactyly	610621	INTU	Intu	1	1	PS208500	Short-rib thoracic dysplasia	1	1	Yes	['lung ciliated cell']	['ciliated epithelial cell']
618021	Tetraamelia Syndrome 2	610575	RSPO2	Rspo2	1	1			0	0
618065	Pontocerebellar Hypoplasia, Type 1d	606180	EXOSC9	Exosc9	1	1	PS607596	Pontocerebellar hypoplasia	1	1	Yes
618108	Immunodeficiency 57	603453	RIPK1	Ripk1	1	1	PS300755	Immunodeficiency (Select Examples)	1	1	Yes	['cd8-positive, alpha-beta t cell', 'nk cell']	['lymphocyte']
618116	Bone Marrow Failure Syndrome 4	612176	MYSM1	Mysm1	1	1	PS614675	Bone marrow failure syndrome	1	1	NA
618131	Immunodeficiency 58	610859	CARMIL2	Carmil2	1	1	PS300755	Immunodeficiency (Select Examples)	0	0		['cd8-positive, alpha-beta t cell', 'nk cell']	['lymphocyte']
618175	Warburg-cinotti Syndrome	191311	DDR2	Ddr2	1	1			1	1	Yes
618183	Diarrhea 10, Protein-losing Enteropathy Type	607647	PLVAP	Plvap	1	1	PS214700	Diarrhea, congenital	1	1	NA
618204	Immunodeficiency 15a	603258	IKBKB	Ikbkb	1	1	PS300755	Immunodeficiency (Select Examples)	1	1	Yes	['cd8-positive, alpha-beta t cell', 'nk cell']	['lymphocyte']
618213	Inflammatory Bowel Disease, Immunodeficiency, And Encephalopathy	190180	TGFB1	Tgfb1	1	1			0	1
618254	Ciliary Dyskinesia, Primary, 39	618227	LRRC56	Lrrc56	1	1	PS244400	Primary ciliary dyskinesia	1	1	Yes	['lung ciliated cell']	['ciliated epithelial cell']
618278	Fibrosis, Neurodegeneration, And Cerebral Angiomatosis	618277	NHLRC2	Nhlrc2	1	1			1	1	Yes		['capillary endothelial cell']
618280	Cardiac-urogenital Syndrome	608329	MYRF	Myrf	1	1			1	0		['type i pneumocyte']
618282	Hyper-ige Recurrent Infection Syndrome 3, Autosomal Recessive	618269	ZNF341	Zfp341	1	1	PS147060	Hyper-IgE recurrent infection syndrome	0	0		['neutrophil']	['non-classical monocyte']
618307	Epidermodysplasia Verruciformis, Susceptibility To, 4	602037	RHOH	Rhoh	1	1	PS226400	Epidermodysplasia verruciformis, susceptibility to	1	1	Yes		['B cell']
618313	Diamond-blackfan Anemia 20	603674	RPS15A	Rps15a	1	1	PS105650	Diamond-Blackfan anemia	1	1	No
618316	Intellectual Developmental Disorder With Cardiac Defects And Dysmorphic Facies	618163	TMEM94	Tmem94	1	1			1	0
618332	Menke-hennekam Syndrome 1	600140	CREBBP	Crebbp	1	1	PS618332	Menke-Hennekam syndrome	1	1	No
618333	Menke-hennekam Syndrome 2	602700	EP300	Ep300	1	1	PS618332	Menke-Hennekam syndrome	1	1	No
618371	Turnpenny-fry Syndrome	600346	PCGF2	Pcgf2	1	1			1	1	No
618394	Immunodeficiency 60	605394	BACH2	Bach2	1	1	PS300755	Immunodeficiency (Select Examples)	1	1	Yes	['cd8-positive, alpha-beta t cell', 'nk cell']	['lymphocyte']
618449	Ciliary Dyskinesia, Primary, 41	611398	GAS2L2	Gas2l2	1	1	PS244400	Primary ciliary dyskinesia	1	1	Yes	['lung ciliated cell']	['ciliated epithelial cell']
618493	Hypotonia, Hyperventilation, Impaired Intellectual Development, Dysautonomia, Epilepsy, And Eye Abnormalities	614584	P4HTM	P4htm	1	1			1	1	Yes
618495	Immunodeficiency 63 With Lymphoproliferation And Autoimmunity	146710	IL2RB	Il2rb	1	1	PS300755	Immunodeficiency (Select Examples)	1	1	Yes	['cd8-positive, alpha-beta t cell', 'nk cell']	['lymphocyte']
618497	Neurodevelopmental Disorder With Seizures And Nonepileptic Hyperkinetic Movements	601012	CACNA1B	Cacna1b	1	1			0	0
618523	Hyper-ige Recurrent Infection Syndrome 4, Autosomal Recessive	600694	IL6ST	Il6st	1	1	PS147060	Hyper-IgE recurrent infection syndrome	1	1	Yes	['neutrophil']	['non-classical monocyte']
618534	Immunodeficiency 64	603962	RASGRP1	Rasgrp1	1	1	PS300755	Immunodeficiency (Select Examples)	1	1	Yes	['cd8-positive, alpha-beta t cell', 'nk cell']	['lymphocyte']
618547	Neurodevelopmental Disorder With Visual Defects And Brain Anomalies	142600	HK1	Hk1	1	1			1	1	No
618603	Neurodevelopmental Disorder With Hypotonia And Variable Intellectual And Behavioral Abnormalities	180660	POLR2A	Polr2a	1	1			1	1	No
618606	Pontocerebellar Hypoplasia, Type 13	615738	VPS51	Vps51	1	1	PS607596	Pontocerebellar hypoplasia	1	0
618618	Spondyloepiphyseal Dysplasia, Nishimura Type	611894	MIR140		1	1			0	0
618674	Pulmonary Fibrosis And/or Bone Marrow Failure, Telomere-related, 5	616381	ZCCHC8	Zcchc8	1	1	PS614742	Pulmonary fibrosis and/or bone marrow failure, telomere-related	1	1	Yes
618695	Ciliary Dyskinesia, Primary, 42	614086	MCIDAS	Mcidas	1	1	PS244400	Primary ciliary dyskinesia	1	0		['lung ciliated cell']	['ciliated epithelial cell']
618699	Ciliary Dyskinesia, Primary, 43	602291	FOXJ1	Foxj1	1	1	PS244400	Primary ciliary dyskinesia	1	1	Yes	['lung ciliated cell']	['ciliated epithelial cell']
618744	Epileptic Encephalopathy, Early Infantile, 83	191760	UGP2	Ugp2	1	1	PS308350	Developmental and epileptic encephalopathy	1	1	NA
618773	Lymphatic Malformation 8	114190	CALCRL	Calcrl	1	1	PS153100	Lymphatic malformation	1	1	Yes	['bronchial vessel endothelial cell', 'capillary aerocyte', 'capillary endothelial cell', 'endothelial cell of artery', 'endothelial cell of lymphatic vessel', 'lung microvascular endothelial cell', 'vein endothelial cell']	['pulmonary artery endothelial cell']
618780	Congenital Heart Defects, Multiple Types, 7	136352	FLT4	Flt4	1	1			1	1	No
618781	Ciliary Dyskinesia, Primary, 44	618726	NEK10		1	1	PS244400	Primary ciliary dyskinesia	1	0		['lung ciliated cell']	['ciliated epithelial cell']
618801	Ciliary Dyskinesia, Primary, 45	610732	TTC12	Ttc12	1	1	PS244400	Primary ciliary dyskinesia	1	1	Yes	['lung ciliated cell']	['ciliated epithelial cell']
618806	T-cell Lymphopenia, Infantile, With Or Without Nail Dystrophy, Autosomal Dominant	600838	FOXN1	Foxn1	1	1			0	0
618849	Bone Marrow Failure Syndrome 6	602704	MDM4	Mdm4	1	1	PS614675	Bone marrow failure syndrome	1	1	NA
618853	Anauxetic Dysplasia 3	617089	NEPRO	Nepro	1	1	PS607095	Anauxetic dysplasia	1	0
618913	Fanconi Renotubular Syndrome 5	612392	NDUFAF6	Ndufaf6	1	1	PS134600	Fanconi renotubular syndrome	1	0
618935	Chronic Granulomatous Disease 5, Autosomal Recessive	618334	CYBC1	Cybc1	1	1	PS306400	Granulomatous disease, chronic	1	0		['classical monocyte', 'intermediate monocyte', 'macrophage', 'neutrophil', 'plasmacytoid dendritic cell']	['neutrophil', 'classical monocyte', 'non-classical monocyte']
618944	Hyper-ige Recurrent Infection Syndrome 5, Autosomal Recessive	147880	IL6R	Il6ra	1	1	PS147060	Hyper-IgE recurrent infection syndrome	1	1	Yes	['neutrophil']	['non-classical monocyte']
618950	Suleiman-el-hattab Syndrome	608270	TASP1	Tasp1	1	1			1	0		['bronchial smooth muscle cell']
618969	Immunodeficiency 70	609209	IVNS1ABP	Ivns1abp	1	1	PS300755	Immunodeficiency (Select Examples)	1	1	Yes	['cd8-positive, alpha-beta t cell', 'nk cell']	['lymphocyte']
618975	Myopathy, Congenital, With Diaphragmatic Defects, Respiratory Insufficiency, And Dysmorphic Facies	159970	MYOD1	Myod1	1	1			0	0
618986	Immunodeficiency 73b With Defective Neutrophil Chemotaxis And Lymphopenia	602049	RAC2	Rac2	1	1	PS300755	Immunodeficiency (Select Examples)	1	1	Yes	['cd8-positive, alpha-beta t cell', 'nk cell']	['lymphocyte']
618987	Immunodeficiency 73c With Defective Neutrophil Chemotaxis And Hypogammaglobulinemia	602049	RAC2	Rac2	1	1	PS300755	Immunodeficiency (Select Examples)	1	1	Yes	['cd8-positive, alpha-beta t cell', 'nk cell']	['lymphocyte']
619003	Mitochondrial Complex I Deficiency, Nuclear Type 35	603843	NDUFB10	Ndufb10	1	1	PS252010	Mitochondrial complex I deficiency, nuclear type	1	1	Yes
619013	Rajab Interstitial Lung Disease With Brain Calcifications 2	602918	FARSA	Farsa	1	1	PS613658	Rajab interstitial lung disease with brain calcifications	1	1	Yes
619036	Myopathy, Epilepsy, And Progressive Cerebral Atrophy	612866	ALG14	Alg14	1	1			1	1	Yes
619057	Combined Oxidative Phosphorylation Deficiency 51	614918	PTCD3	Ptcd3	1	1	PS609060	Combined oxidative phosphorylation deficiency	1	1	Yes
619063	Mitochondrial Complex Iv Deficiency, Nuclear Type 19	614771	PET117	Pet117	1	1	PS220110	Mitochondrial complex IV deficiency, nuclear-type	1	0
619126	Immunodeficiency 75	612839	TET2	Tet2	1	1	PS300755	Immunodeficiency (Select Examples)	1	1	Yes	['cd8-positive, alpha-beta t cell', 'nk cell']	['lymphocyte']

## Sheet: Skeletal muscle
Supplementary File 1C. Diseases, disease genes, and likely-affected cell types of skeletal muscle.
Disease accession (OMIM)	Disease name (OMIM)	Gene accession (OMIM)	Gene symbol (OMIM)	Mouse ortholog (MGI)	Known molecular basis (1=Yes, 0=No)	Germline aberrations (1=Yes, 0=No)	Phenotypic series accession (OMIM)	Phenotypic series name (OMIM)	Expressed in human tissue (1=Yes, 0=No)	Expressed in mouse tissue (1=Yes, 0=No)	Inflicted (ODiseA)	Human likely-affected cell types	Mouse similar likely-affected cell types
100100	Abdominal Muscles, Absence Of, With Urinary Tract Abnormality Andcryptorchidism	118494	CHRM3	Chrm3	1	1			1	0		['endothelial cell of artery']
100300	Adams-oliver Syndrome	610911	ARHGAP31	Arhgap31	1	1	PS100300	Adams-Oliver syndrome	1	1		['capillary endothelial cell']
100800	Achondroplasia	134934	FGFR3	Fgfr3	1	1			0	1			['endothelial cell of artery']
103050	Adenylosuccinase Deficiency	608222	ADSL	Adsl	1	1			1	1		['fast muscle cell']
105120	Amyloidosis V	137350	GSN	Gsn	1	1			1	1		['mesenchymal stem cell']	['skeletal muscle fibroblast; fibroblast']
105210	Amyloidosis, Hereditary, Transthyretin-related	176300	TTR	Ttr	1	1			0	0
105400	Amyotrophic Lateral Sclerosis 1	601143	DCTN1	Dctn1	1	1	PS105400	Amyotrophic lateral sclerosis	1	1
105400	Amyotrophic Lateral Sclerosis 1	170710	PRPH	Prph	1	1	PS105400	Amyotrophic lateral sclerosis	1	1
105400	Amyotrophic Lateral Sclerosis 1	147450	SOD1	Sod1	1	1	PS105400	Amyotrophic lateral sclerosis	1	1
105400	Amyotrophic Lateral Sclerosis 1	162230	NEFH	Nefh	1	1	PS105400	Amyotrophic lateral sclerosis	0	0
105500	Amyotrophic Lateral Sclerosis-parkinsonism/dementia Complex 1	605692	TRPM7	Trpm7	1	1			1	1
105550	Amyotrophic Lateral Sclerosis And/or Frontotemporal Dementia 1	614260	C9orf72	C9orf72	1	1	PS105400	Amyotrophic lateral sclerosis	1	0
105550	Amyotrophic Lateral Sclerosis And/or Frontotemporal Dementia 1	614260	C9orf72	C9orf72	1	1	PS105550	Frontotemporal dementia and/or Amyotrophic Lateral Sclerosis	1	0		['mast cell']
105830	Angelman Syndrome	601623	UBE3A	Ube3a	1	1			1	1
108120	Arthrogryposis, Distal, Type 1a	190990	TPM2		1	1	PS108120	Arthrogryposis, distal	1	0		['fast muscle cell']	['striated muscle cell']
108145	Arthrogryposis, Distal, Type 5	613629	PIEZO2	Piezo2	1	1	PS108120	Arthrogryposis, distal	1	0		['fast muscle cell']	['striated muscle cell']
108500	Episodic Ataxia, Type 2	601011	CACNA1A	Cacna1a	1	1	PS160120	Episodic ataxia	1	0
108600	Spastic Ataxia 1, Autosomal Dominant	185880	VAMP1	Vamp1	1	1	PS108600	Spastic ataxia	1	1		['skeletal muscle satellite stem cell']
109150	Machado-joseph Disease	607047	ATXN3	Atxn3	1	1	PS164400	Spinocerebellar ataxia	1	0			['smooth muscle cell']
109400	Basal Cell Nevus Syndrome	603673	PTCH2	Ptch2	1	1			0	0
109400	Basal Cell Nevus Syndrome	601309	PTCH1	Ptch1	1	1			1	0
109400	Basal Cell Nevus Syndrome	607035	SUFU	Sufu	1	1			1	0
112250	Diaphyseal Medullary Stenosis With Malignant Fibrous Histiocytoma	156540	MTAP	Mtap	1	1			1	1
113000	Brachydactyly, Type B1	602337	ROR2	Ror2	1	1			1	0
113620	Branchiooculofacial Syndrome	107580	TFAP2A	Tfap2a	1	1			0	0
113650	Branchiootorenal Syndrome 1	601653	EYA1	Eya1	1	1			0	0
114290	Campomelic Dysplasia	608160	SOX9	Sox9	1	1			1	1
114300	Arthrogryposis, Distal, Type 3	613629	PIEZO2	Piezo2	1	1	PS108120	Arthrogryposis, distal	1	0		['fast muscle cell']	['striated muscle cell']
115150	Cardiofaciocutaneous Syndrome 1	164757	BRAF	Braf	1	1	PS115150	Cardiofaciocutaneous syndrome	1	1	Yes
115197	Cardiomyopathy, Familial Hypertrophic, 4	600958	MYBPC3	Mybpc3	1	1	PS192600	Cardiomyopathy, familial hypertrophic	0	0
116860	Cerebral Cavernous Malformations	604214	KRIT1	Krit1	1	1	PS116860	Cerebral cavernous malformations	1	1
117000	Central Core Disease Of Muscle	180901	RYR1	Ryr1	1	1			1	1		['fast muscle cell']	['monocyte-derived dendritic cell']
117300	Dementia, Familial Danish	603904	ITM2B	Itm2b	1	1			1	1
117550	Sotos Syndrome	606681	NSD1	Nsd1	1	1	PS117550	Sotos syndrome	1	1
117650	Cerebrocostomandibular Syndrome	182282	SNRPB	Snrpb	1	1			1	1
118100	Klippel-feil Syndrome 1, Autosomal Dominant	601147	GDF6	Gdf6	1	1	PS118100	Klippel-Feil syndrome	0	0		['slow muscle cell']
118200	Charcot-marie-tooth Disease, Demyelinating, Type 1b	159440	MPZ	Mpz	1	1	PS118220	Charcot-Marie-Tooth disease	1	1
118210	Charcot-marie-tooth Disease, Axonal, Type 2a1	605995	KIF1B	Kif1b	1	1	PS118220	Charcot-Marie-Tooth disease	1	1
118220	Charcot-marie-tooth Disease, Demyelinating, Type 1a	601097	PMP22	Pmp22	1	1	PS118220	Charcot-Marie-Tooth disease	1	1
118300	Charcot-marie-tooth Disease And Deafness	601097	PMP22	Pmp22	1	1	PS118220	Charcot-Marie-Tooth disease	1	1
118800	Paroxysmal Nonkinesigenic Dyskinesia 1	609023	PNKD	Pnkd	1	1	PS128100	Dystonia	1	1
121050	Contractural Arachnodactyly, Congenital	612570	FBN2	Fbn2	1	1	PS108120	Arthrogryposis, distal	0	1		['fast muscle cell']	['striated muscle cell']
121300	Coproporphyria	612732	CPOX	Cpox	1	1			1	1
122470	Cornelia De Lange Syndrome 1	608667	NIPBL	Nipbl	1	1	PS122470	Cornelia de Lange syndrome	1	1
122860	Craniodiaphyseal Dysplasia, Autosomal Dominant	605740	SOST	Sost	1	1			0	0
123000	Craniometaphyseal Dysplasia, Autosomal Dominant	605145	ANKH	Ank	1	1	PS123000	Craniometaphyseal dysplasia	1	1
123320	Creatine Phosphokinase, Elevated Serum	601253	CAV3	Cav3	1	1			1	1		['fast muscle cell']	['striated muscle cell']
124000	Mitochondrial Complex Iii Deficiency	603647	BCS1L	Bcs1l	1	1	PS124000	Mitochondrial complex III deficiency, nuclear type	1	0	Yes	['fast muscle cell', 'slow muscle cell']	['striated muscle cell']
125250	Optic Atrophy With Or Without Deafness, Ophthalmoplegia, Myopathy,ataxia, And Neuropathy	605290	OPA1	Opa1	1	1			1	0
126200	Multiple Sclerosis, Susceptibility To	600244	PDCD1	Pdcd1	1	1	PS126200	Multiple sclerosis, susceptibility to	1	1		['endothelial cell of vascular tree']
126200	Multiple Sclerosis, Susceptibility To	142857	HLA-DRB1		1	1	PS126200	Multiple sclerosis, susceptibility to	1	0		['endothelial cell of vascular tree']
126200	Multiple Sclerosis, Susceptibility To	604305	HLA-DQB1	H2-Ab1	1	1	PS126200	Multiple sclerosis, susceptibility to	1	1		['endothelial cell of vascular tree']
127300	Leri-weill Dyschondrosteosis	312865	SHOX		1	1			0	0
127300	Leri-weill Dyschondrosteosis	400020	SHOX		1	1			0	0
128100	Dystonia 1, Torsion, Autosomal Dominant	605204	TOR1A	Tor1a	1	1	PS128100	Dystonia	1	1
128101	Dystonia Musculorum Deformans 4	602662	TUBB4A	Tubb4a	1	1	PS128100	Dystonia	0	1
128230	Dystonia, Dopa-responsive	600225	GCH1	Gch1	1	1	PS128100	Dystonia	1	1
128235	Dystonia 12	182350	ATP1A3	Atp1a3	1	1	PS128100	Dystonia	0	1
129200	Basan Syndrome	612761	SMARCAD1	Smarcad1	1	1			1	1
130000	Ehlers-danlos Syndrome, Type I	120215	COL5A1	Col5a1	1	1	PS130000	Ehlers-Danlos syndrome	1	1		['mesenchymal stem cell', 'tendon cell']	['tendon cell', 'stromal cell']
130060	Ehlers-danlos Syndrome, Type Vii, Autosomal Dominant	120150	COL1A1	Col1a1	1	1	PS130000	Ehlers-Danlos syndrome	1	1		['mesenchymal stem cell', 'tendon cell']	['tendon cell', 'stromal cell']
130070	Ehlers-danlos Syndrome, Spondylodysplastic Type, 1	604327	B4GALT7	B4galt7	1	1	PS130000	Ehlers-Danlos syndrome	1	0		['mesenchymal stem cell', 'tendon cell']	['tendon cell', 'stromal cell']
130650	Beckwith-wiedemann Syndrome	616186	ICR1		1	1			0	0		['capillary endothelial cell']
130650	Beckwith-wiedemann Syndrome	604115	KCNQ1OT1		1	1			1	0		['capillary endothelial cell']
130650	Beckwith-wiedemann Syndrome	600856	CDKN1C		1	1			1	0		['capillary endothelial cell']
130720	Lateral Meningocele Syndrome	600276	NOTCH3	Notch3	1	1			1	1			['pericyte cell']
131300	Camurati-engelmann Disease	190180	TGFB1	Tgfb1	1	1			0	1
133020	Erythermalgia, Primary	603415	SCN9A	Scn9a	1	1			1	0
133190	Spinocerebellar Ataxia 34	605512	ELOVL4	Elovl4	1	1	PS164400	Spinocerebellar ataxia	0	0			['smooth muscle cell']
133540	Cockayne Syndrome, Type B	609413	ERCC6	Ercc6	1	1			0	0
134600	Fanconi Renotubular Syndrome 1	602360	GATM	Gatm	1	1	PS134600	Fanconi renotubular syndrome	1	1			['myelinating Schwann cell']
135500	Zimmermann-laband Syndrome 1	603305	KCNH1	Kcnh1	1	1	PS135500	Zimmermann-Laband syndrome	0	0
135700	Fibrosis Of Extraocular Muscles, Congenital, 1	608283	KIF21A	Kif21a	1	1	PS135700	Fibrosis of extraocular muscles, congenital	1	1	Yes
135900	Coffin-siris Syndrome 1	614556	ARID1B	Arid1b	1	1	PS135900	Coffin-Siris syndrome	1	1		['t cell']	['myelinating Schwann cell']
135900	Coffin-siris Syndrome 1	614556	ARID1B	Arid1b	1	1	PS156200	Mental retardation, autosomal dominant	1	1
136760	Frontonasal Dysplasia	606014	ALX3	Alx3	1	1	PS136760	Frontonasal dysplasia	0	0
137200	Neuromyotonia And Axonal Neuropathy, Autosomal Recessive	601314	HINT1	Hint1	1	1			1	1			['skeletal muscle satellite cell']
137440	Gerstmann-straussler Disease	176640	PRNP	Prnp	1	1			1	1
139210	Myhre Syndrome	600993	SMAD4	Smad4	1	1			1	1
140000	Hand-foot-uterus Syndrome	142959	HOXA13	Hoxa13	1	1			0	0
142680	Periodic Fever, Familial, Autosomal Dominant	191190	TNFRSF1A	Tnfrsf1a	1	1			1	1
142900	Holt-oram Syndrome	601620	TBX5	Tbx5	1	1			0	0
143095	Spondyloepiphyseal Dysplasia With Congenital Joint Dislocations	603799	CHST3	Chst3	1	1			1	0
143880	Hypercalcemia, Infantile, 1	126065	CYP24A1	Cyp24a1	1	1	PS143880	Hypercalcemia, infantile	0	0
144755	Hyperostosis Cranialis Interna	608736	SLC39A14	Slc39a14	1	1			1	1			['skeletal muscle satellite cell']
145410	Opitz Gbbb Syndrome, Autosomal Dominant	614140	SPECC1L	Specc1l	1	1	PS300000	Opitz GBBB syndrome	1	1
145600	Malignant Hyperthermia, Susceptibility To, 1	180901	RYR1	Ryr1	1	1	PS145600	Malignant hyperthermia	1	1	Yes	['fast muscle cell']	['monocyte-derived dendritic cell']
145900	Hypertrophic Neuropathy Of Dejerine-sottas	159440	MPZ	Mpz	1	1	PS118220	Charcot-Marie-Tooth disease	1	1
145900	Hypertrophic Neuropathy Of Dejerine-sottas	129010	EGR2	Egr2	1	1	PS118220	Charcot-Marie-Tooth disease	1	1
145900	Hypertrophic Neuropathy Of Dejerine-sottas	601097	PMP22	Pmp22	1	1	PS118220	Charcot-Marie-Tooth disease	1	1
145900	Hypertrophic Neuropathy Of Dejerine-sottas	605725	PRX	Prx	1	1	PS118220	Charcot-Marie-Tooth disease	1	1
146200	Hypoparathyroidism, Familial Isolated	168450	PTH	Pth	1	1	PS146200	Hypoparathyroidism, familial	0	0
146500	Multiple System Atrophy 1, Susceptibility To	609825	COQ2	Coq2	1	1			1	1		['slow muscle cell']
147750	Ivic Syndrome	607343	SALL4	Sall4	1	1			0	0
147920	Kabuki Syndrome	602113	KMT2D	Kmt2d	1	1	PS147920	Kabuki syndrome	1	0
148210	Keratitis-ichthyosis-deafness Syndrome, Autosomal Dominant	121011	GJB2	Gjb2	1	1	PS148210	Keratitis-ichthyosis-deafness syndrome	1	0
148820	Waardenburg Syndrome, Type 3	606597	PAX3	Pax3	1	1	PS193500	Waardenburg syndrome	0	0		['endothelial cell of lymphatic vessel', 'pericyte cell']
149400	Hyperekplexia, Hereditary	138491	GLRA1	Glra1	1	1	PS149400	Hyperekplexia	0	0
149730	Lacrimoauriculodentodigital Syndrome	134934	FGFR3	Fgfr3	1	1			0	1			['endothelial cell of artery']
149730	Lacrimoauriculodentodigital Syndrome	602115	FGF10	Fgf10	1	1			1	0			['endothelial cell of artery']
149730	Lacrimoauriculodentodigital Syndrome	176943	FGFR2	Fgfr2	1	1			0	0			['endothelial cell of artery']
151050	Lenz-majewski Hyperostotic Dwarfism	612792	PTDSS1	Ptdss1	1	1			1	1
151100	Leopard Syndrome 1	176876	PTPN11	Ptpn11	1	1	PS151100	LEOPARD syndrome	1	1
151660	Lipodystrophy, Familial Partial, Type 2	150330	LMNA	Lmna	1	1	PS151660	Lipodystrophy, familial partial	1	1	Yes	['capillary endothelial cell']	['capillary endothelial cell', 'blood vessel endothelial cell']
153400	Lymphedema-distichiasis Syndrome	602402	FOXC2	Foxc2	1	1			1	1		['endothelial cell of lymphatic vessel']
154020	Hypomagnesemia 2, Renal	601814	FXYD2		1	1	PS602014	Hypomagnesemia	0	0
154700	Marfan Syndrome	134797	FBN1	Fbn1	1	1			1	1			['skeletal muscle fibroblast; fibroblast.1']
156400	Metaphyseal Chondrodysplasia, Jansen Type	168468	PTH1R	Pth1r	1	1			1	0		['pericyte cell']
156530	Metatropic Dysplasia	605427	TRPV4	Trpv4	1	1			0	1			['endothelial cell of artery']
156550	Kniest Dysplasia	120140	COL2A1	Col2a1	1	1	PS184255	Spondylometaphyseal dysplasia	0	1
156610	Skin Creases, Congenital Symmetric Circumferential, 1	191130	TUBB	Tubb5	1	1	PS156610	Skin creases, congenital symmetric circumferential	1	1
157170	Holoprosencephaly 2	603714	SIX3	Six3	1	1	PS236100	Holoprosencephaly	0	0
157640	Progressive External Ophthalmoplegia With Mitochondrial Dna Deletions,autosomal Dominant, 1	174763	POLG	Polg	1	1	PS157640	Progressive external ophthalmoplegia with mtDNA deletions	1	1
158300	Trismus-pseudocamptodactyly Syndrome	160741	MYH8	Myh8	1	1	PS108120	Arthrogryposis, distal	0	0		['fast muscle cell']	['striated muscle cell']
158580	Neuronopathy, Distal Hereditary Motor, Type Viia	608761	SLC5A7	Slc5a7	1	1			0	0
158590	Neuronopathy, Distal Hereditary Motor, Type Iia	608014	HSPB8	Hspb8	1	1			1	1			['skeletal muscle fibroblast; fibroblast.1']
158600	Spinal Muscular Atrophy, Lower Extremity, Autosomal Dominant	600112	DYNC1H1	Dync1h1	1	1	PS158600	Spinal muscular atrophy, lower extremity-predominant	1	1
158810	Bethlem Myopathy	120250	COL6A3	Col6a3	1	1	PS158810	Bethlem myopathy	1	1	Yes	['mesenchymal stem cell', 'tendon cell']	['tendon cell', 'stromal cell', 'skeletal muscle fibroblast; fibroblast', 'skeletal muscle fibroblast; fibroblast.1']
158810	Bethlem Myopathy	120250	COL6A3	Col6a3	1	1	PS603511	Muscular dystrophy, limb-girdle, autosomal dominant	1	1	Yes	['mesenchymal stem cell', 'tendon cell']	['stromal cell']
158810	Bethlem Myopathy	120220	COL6A1	Col6a1	1	1	PS158810	Bethlem myopathy	1	1	Yes	['mesenchymal stem cell', 'tendon cell']	['tendon cell', 'stromal cell', 'skeletal muscle fibroblast; fibroblast', 'skeletal muscle fibroblast; fibroblast.1']
158810	Bethlem Myopathy	120220	COL6A1	Col6a1	1	1	PS603511	Muscular dystrophy, limb-girdle, autosomal dominant	1	1	Yes	['mesenchymal stem cell', 'tendon cell']	['stromal cell']
158810	Bethlem Myopathy	120240	COL6A2	Col6a2	1	1	PS158810	Bethlem myopathy	1	1	Yes	['mesenchymal stem cell', 'tendon cell']	['tendon cell', 'stromal cell', 'skeletal muscle fibroblast; fibroblast', 'skeletal muscle fibroblast; fibroblast.1']
158810	Bethlem Myopathy	120240	COL6A2	Col6a2	1	1	PS603511	Muscular dystrophy, limb-girdle, autosomal dominant	1	1	Yes	['mesenchymal stem cell', 'tendon cell']	['stromal cell']
158901	Facioscapulohumeral Muscular Dystrophy 2	614982	SMCHD1	Smchd1	1	1			1	1		['t cell']
159900	Myoclonic Dystonia	604149	SGCE	Sgce	1	1	PS128100	Dystonia	1	1
159950	Spinal Muscular Atrophy With Progressive Myoclonic Epilepsy	613468	ASAH1	Asah1	1	1			1	1
160120	Episodic Ataxia, Type 1	176260	KCNA1	Kcna1	1	1	PS160120	Episodic ataxia	0	1
160150	Myopathy, Centronuclear, Autosomal Dominant	611089	MTMR14	Mtmr14	1	1	PS160150	Myopathy, centronuclear	1	1	Yes	['fast muscle cell', 'slow muscle cell']
160150	Myopathy, Centronuclear, Autosomal Dominant	602378	DNM2	Dnm2	1	1	PS160150	Myopathy, centronuclear	1	1	Yes	['fast muscle cell', 'slow muscle cell']
160500	Myopathy, Distal 1	160760	MYH7	Myh7	1	1			1	0		['slow muscle cell']
160565	Myopathy, Tubular Aggregate, 1	605921	STIM1	Stim1	1	1	PS160565	Myopathy, tubular aggregate	1	0	Yes	['cd4-positive, alpha-beta t cell']
160800	Myotonia Congenita, Autosomal Dominant	118425	CLCN1	Clcn1	1	1			0	0
160900	Dystrophia Myotonica 1	605377	DMPK	Dmpk	1	1	PS160900	Myotonic dystrophy	1	1	Yes	['fast muscle cell', 'slow muscle cell']
161200	Nail-patella Syndrome	602575	LMX1B	Lmx1b	1	1			0	0
161800	Nemaline Myopathy 3	102610	ACTA1	Acta1	1	1	PS161800	Nemaline myopathy	1	1	Yes	['fast muscle cell', 'slow muscle cell']	['striated muscle cell']
162100	Amyotrophy, Hereditary Neuralgic	604061	SEPTIN9	Septin9	1	1			0	0
162200	Neurofibromatosis, Type I	613113	NF1	Nf1	1	1			1	1
162210	Neurofibromatosis, Familial Spinal	613113	NF1	Nf1	1	1			1	1
162300	Multiple Endocrine Neoplasia, Type Iib	164761	RET	Ret	1	1	PS131100	Multiple endocrine neoplasia	0	1			['vein endothelial cell; endothelial stalk cell']
162400	Neuropathy, Hereditary Sensory And Autonomic, Type Ia	605712	SPTLC1	Sptlc1	1	1	PS162400	Hereditary sensory and autonomic neuropathy	1	1		['capillary endothelial cell']
162500	Neuropathy, Hereditary, With Liability To Pressure Palsies	601097	PMP22	Pmp22	1	1			1	1
164200	Oculodentodigital Dysplasia	121014	GJA1	Gja1	1	1			1	1		['endothelial cell of vascular tree']
164300	Oculopharyngeal Muscular Dystrophy	602279	PABPN1	Pabpn1	1	1			1	1
164310	Oculopharyngodistal Myopathy 1	618299	LRP12	Lrp12	1	1	PS164310	Oculopharyngodistal myopathy	1	1
164400	Spinocerebellar Ataxia 1	601556	ATXN1	Atxn1	1	1	PS164400	Spinocerebellar ataxia	1	1			['smooth muscle cell']
164500	Spinocerebellar Ataxia 7 Opca Iii Opca With Retinal Degeneration Opca With Macular Degeneration And External Ophthalmoplegia Autosomal Dominant Cerebellar Ataxia, Type Ii Adca, Type Ii	607640	ATXN7	Atxn7	1	1	PS164400	Spinocerebellar ataxia	0	1			['smooth muscle cell']
165500	Optic Atrophy 1	605290	OPA1	Opa1	1	1	PS165500	Optic atrophy	1	0
166350	Osseous Heteroplasia, Progressive	139320	GNAS	Gnas	1	1			1	1
166600	Osteopetrosis, Autosomal Dominant 2	602727	CLCN7	Clcn7	1	1	PS607634	Osteopetrosis, autosomal dominant	1	1
166700	Buschke-ollendorff Syndrome	607844	LEMD3	Lemd3	1	1			1	1
166780	Otofaciocervical Syndrome	601653	EYA1	Eya1	1	1	PS166780	Otofaciocervical syndrome	0	0
167320	Inclusion Body Myopathy With Early-onset Paget Disease And Frontotemporal	601023	VCP	Vcp	1	1	PS167320	Inclusion body myopathy/Paget disease/frontotemporal dementia	1	1	Yes
168300	Paramyotonia Congenita Of Von Eulenburg	603967	SCN4A	Scn4a	1	1			1	0		['capillary endothelial cell']
168400	Parastremmatic Dwarfism	605427	TRPV4	Trpv4	1	1			0	1			['endothelial cell of artery']
169400	Pelger-huet Anomaly	600024	LBR	Lbr	1	1			1	1
169500	Leukodystrophy, Adult-onset, Autosomal Dominant	150340	LMNB1	Lmnb1	1	1			1	1			['monocyte-derived dendritic cell']
170390	Andersen Cardiodysrhythmic Periodic Paralysis	600681	KCNJ2	Kcnj2	1	1	PS192500	Long QT syndrome	1	1		['endothelial cell of artery']
170400	Hypokalemic Periodic Paralysis, Type 1	114208	CACNA1S	Cacna1s	1	1			1	1	Yes
170500	Hyperkalemic Periodic Paralysis	603967	SCN4A	Scn4a	1	1			1	0		['capillary endothelial cell']
175700	Greig Cephalopolysyndactyly Syndrome	165240	GLI3	Gli3	1	1			1	1			['skeletal muscle fibroblast; fibroblast']
175780	Brain Small Vessel Disease 1 With Or Without Ocular Anomalies	120130	COL4A1	Col4a1	1	1	PS175780	Brain small vessel disease	1	1		['mesenchymal stem cell']	['blood vessel endothelial cell', 'skeletal muscle fibroblast; fibroblast']
176000	Porphyria, Acute Intermittent	609806	HMBS	Hmbs	1	1			1	1		['erythrocyte']
176270	Prader-willi Syndrome	602117	NDN	Ndn	1	1			1	1
176270	Prader-willi Syndrome	182279	SNRPN	Snrpn	1	1			1	0
176500	Dementia, Familial British	603904	ITM2B	Itm2b	1	1			1	1
178110	Contractures, Pterygia, And Spondylocarpostarsal Fusion Syndrome 1a	160720	MYH3	Myh3	1	1	PS178110	Contractures, pterygia, and variable skeletal fusions syndrome	0	0
179800	Renal Tubular Acidosis, Distal, Autosomal Dominant	109270	SLC4A1	Slc4a1	1	1	PS179800	Distal renal tubular acidosis	1	0		['erythrocyte']
180295	Rhabdomyosarcoma, Embryonal, 2	606241	DICER1	Dicer1	1	1			1	0
180700	Robinow Syndrome, Autosomal Dominant	164975	WNT5A	Wnt5a	1	1	PS268310	Robinow syndrome	1	0
180800	Roussy-levy Hereditary Areflexic Dystasia	159440	MPZ	Mpz	1	1			1	1		['pericyte cell']	['myelinating Schwann cell']
180800	Roussy-levy Hereditary Areflexic Dystasia	601097	PMP22	Pmp22	1	1			1	1		['pericyte cell']	['myelinating Schwann cell']
180849	Rubinstein-taybi Syndrome 1	600140	CREBBP	Crebbp	1	1	PS180849	Rubinstein-Taybi syndrome	1	1
181350	Emery-dreifuss Muscular Dystrophy, Autosomal Dominant	150330	LMNA	Lmna	1	1	PS310300	Emery-Dreifuss muscular dystrophy	1	1	Yes
181400	Scapuloperoneal Syndrome, Neurogenic, Kaeser Type	125660	DES	Des	1	1			1	1
181405	Scapuloperoneal Spinal Muscular Atrophy	605427	TRPV4	Trpv4	1	1			0	1			['endothelial cell of artery']
181430	Scapuloperoneal Myopathy, Myh7-related	160760	MYH7	Myh7	1	1			1	0		['slow muscle cell']
182212	Shprintzen-goldberg Craniosynostosis Syndrome	164780	SKI	Ski	1	1			1	1
182250	Singleton-merten Syndrome	606951	IFIH1	Ifih1	1	1	PS182250	Singleton-Merten syndrome	1	1
182290	Smith-magenis Syndrome Smith-magenis Chromosome Region, Included	607642	RAI1	Rai1	1	1			1	1
182410	Sneddon Syndrome	607575	ADA2		1	1			1	0
182600	Spastic Paraplegia 3, Autosomal Dominant	606439	ATL1	Atl1	1	1	PS303350	Spastic paraplegia	1	0
182601	Spastic Paraplegia 4, Autosomal Dominant	604277	SPAST	Spast	1	1	PS303350	Spastic paraplegia	1	0
182920	Myopathy, Spheroid Body	604103	MYOT	Myot	1	1	PS601419	Myopathy, myofibrillar	1	1	Yes	['fast muscle cell', 'slow muscle cell']	['striated muscle cell']
182980	Spinal Muscular Atrophy, Proximal, Adult, Autosomal Dominantspinal Muscular Atrophy, Late-onset, Finkel Type, Included	605704	VAPB	Vapb	1	1			1	1
183090	Spinocerebellar Ataxia 2	601517	ATXN2	Atxn2	1	1	PS105400	Amyotrophic lateral sclerosis	1	1
183090	Spinocerebellar Ataxia 2	601517	ATXN2	Atxn2	1	1	PS164400	Spinocerebellar ataxia	1	1			['smooth muscle cell']
183900	Spondyloepiphyseal Dysplasia Congenita	120140	COL2A1	Col2a1	1	1			0	1			['tendon cell']
184900	Stiff Skin Syndrome	134797	FBN1	Fbn1	1	1			1	1		['mesenchymal stem cell']	['skeletal muscle fibroblast; fibroblast.1']
185070	Stormorken Syndrome	605921	STIM1	Stim1	1	1			1	0
186000	Synpolydactyly 1	142989	HOXD13	Hoxd13	1	1			0	0
186300	Syndactyly, Type V	142989	HOXD13	Hoxd13	1	1			0	0
186580	Blau Syndrome	605956	NOD2	Nod2	1	1			1	1			['endothelial cell of artery']
188400	Digeorge Syndrome	602054	TBX1	Tbx1	1	1			1	1			['endothelial cell of lymphatic vessel']
188580	Thyrotoxic Periodic Paralysis, Susceptibility To, 1	114208	CACNA1S	Cacna1s	1	1	PS188580	Thyrotoxic periodic paralysis	1	1
190350	Trichorhinophalangeal Syndrome, Type I	604386	TRPS1	Trps1	1	1	PS190350	Trichorhinophalangeal syndrome	1	1
191100	Tuberous Sclerosis-1	605284	TSC1	Tsc1	1	1	PS191100	Tuberous sclerosis	1	0		['cd8-positive, alpha-beta t cell']
193100	Hypophosphatemic Rickets, Autosomal Dominant	605380	FGF23	Fgf23	1	1	PS193100	Hypophosphatemic rickets	0	0
193700	Arthrogryposis, Distal, Type 2a	160720	MYH3	Myh3	1	1	PS108120	Arthrogryposis, distal	0	0		['fast muscle cell']	['striated muscle cell']
194080	Denys-drash Syndrome	607102	WT1	Wt1	1	1			1	0		['mesothelial cell']
200150	Choreoacanthocytosis	605978	VPS13A	Vps13a	1	1			1	1
200700	Chondrodysplasia, Grebe Type	601146	GDF5	Gdf5	1	1			0	0
200990	Acrocallosal Syndrome	611254	KIF7	Kif7	1	1	PS213300	Joubert syndrome	0	0			['smooth muscle cell']
201000	Carpenter Syndrome	606144	RAB23	Rab23	1	1	PS201000	Carpenter syndrome	0	1
201300	Neuropathy, Hereditary Sensory And Autonomic, Type Ii	605232	WNK1	Wnk1	1	1	PS162400	Hereditary sensory and autonomic neuropathy	1	1		['capillary endothelial cell']
201450	Acyl-coa Dehydrogenase, Medium-chain, Deficiency Of	607008	ACADM	Acadm	1	1			1	1
201470	Acyl-coa Dehydrogenase, Short-chain, Deficiency Of	606885	ACADS	Acads	1	1			1	1
201475	Acyl-coa Dehydrogenase, Very Long-chain, Deficiency Of	609575	ACADVL	Acadvl	1	1			1	1		['slow muscle cell']
201750	Antley-bixler Syndrome With Genital Anomalies And Disordered Steroidogenesis	124015	POR	Por	1	1			1	1
203450	Alexander Disease	137780	GFAP	Gfap	1	1			0	0
203700	Mitochondrial Dna Depletion Syndrome 4a (alpers Type)	174763	POLG	Polg	1	1	PS603041	Mitochondrial DNA depletion syndrome	1	1	Yes
204750	2-@aminoadipic 2-oxoadipic Aciduria	614984	DHTKD1	Dhtkd1	1	1			1	0
205100	Amyotrophic Lateral Sclerosis 2, Juvenile	606352	ALS2	Als2	1	1	PS105400	Amyotrophic lateral sclerosis	1	0
205400	Tangier Disease	600046	ABCA1	Abca1	1	1			1	1
206900	Microphthalmia, Syndromic 3	184429	SOX2	Sox2	1	1	PS309800	Microphthalmia, syndromic	0	1		['capillary endothelial cell']
206920	Microphthalmia With Limb Anomalies	608488	SMOC1	Smoc1	1	1			1	0		['endothelial cell of lymphatic vessel']
207410	Antley-bixler Syndrome Without Genital Anomalies Or Disordered Steroidogenesis	176943	FGFR2	Fgfr2	1	1			0	0
207800	Argininemia	608313	ARG1	Arg1	1	1			0	0
208050	Arterial Tortuosity Syndrome	606145	SLC2A10	Slc2a10	1	1			1	0		['tendon cell']
208085	Arthrogryposis, Renal Dysfunction, And Cholestasis	608552	VPS33B	Vps33b	1	1	PS208085	Arthrogryposis, renal dysfunction, and cholestasis	0	0
208100	Arthrogryposis Multiplex Congenita, Neurogenic Type	617946	ERGIC1	Ergic1	1	1	PS617468	Arthrogryposis multiplex congenita	1	1
208150	Fetal Akinesia Deformation Sequence	601296	MUSK	Musk	1	1	PS208150	Fetal akinesia deformation sequence	1	1		['skeletal muscle satellite stem cell']	['skeletal muscle satellite cell']
208230	Arthropathy, Progressive Pseudorheumatoid, Of Childhood	603400	CCN6	Ccn6	1	1			0	0
208250	Camptodactyly-arthropathy-coxa Vara-pericarditis Syndrome	604283	PRG4		1	1			1	0		['mesothelial cell']
208400	Aspartylglucosaminuria	613228	AGA	Aga	1	1			1	1
208920	Ataxia, Early-onset, With Oculomotor Apraxia And Hypoalbuminemia	606350	APTX	Aptx	1	1			1	1		['cd4-positive, alpha-beta t cell']
210000	Behr Syndrome	605290	OPA1	Opa1	1	1			1	0
210200	3-methylcrotonyl-coa Carboxylase 1 Deficiency	609010	MCCC1	Mccc1	1	1	PS210200	Methylcrotonylglycinuria	1	0		['mesothelial cell']
210210	3-methylcrotonyl-coa Carboxylase 2 Deficiency	609014	MCCC2	Mccc2	1	1	PS210200	Methylcrotonylglycinuria	1	1		['mesothelial cell']
210600	Seckel Syndrome 1	601215	ATR	Atr	1	1	PS210600	Seckel syndrome	0	0
210710	Microcephalic Osteodysplastic Primordial Dwarfism, Type I	601428	RNU4ATAC		1	1			0	0
211500	Bulbar Palsy, Progressive, Of Childhood	613350	SLC52A3	Slc52a3	1	1			0	1			['vein endothelial cell; endothelial stalk cell']
211530	Bulbar Palsy, Progressive, With Sensorineural Deafness	613350	SLC52A3	Slc52a3	1	1	PS211530	Brown-Vialetto-Van Laere syndrome	0	1
211750	C Syndrome	606037	CD96	Cd96	1	1			1	1
211900	Tumoral Calcinosis, Hyperphosphatemic, Familial	601756	GALNT3	Galnt3	1	1			1	0
212065	Congenital Disorder Of Glycosylation, Type Ia	601785	PMM2	Pmm2	1	1	PS212065	Congenital disorders of glycosylation, type I	1	1
212066	Congenital Disorder Of Glycosylation, Type Iia	602616	MGAT2	Mgat2	1	1	PS212066	Congenital disorders of glycosylation, type II	1	1
212138	Carnitine-acylcarnitine Translocase Deficiency	613698	SLC25A20	Slc25a20	1	1			0	1
212140	Carnitine Deficiency, Systemic Primary	603377	SLC22A5	Slc22a5	1	1			1	1
212350	Cataract And Cardiomyopathy	610345	AGK	Agk	1	1	PS603041	Mitochondrial DNA depletion syndrome	1	1	Yes
213000	Cerebellar Hypoplasia	605609	OXR1	Oxr1	1	1			1	1
213200	Spinocerebellar Ataxia, Autosomal Recessive 2	613036	PMPCA	Pmpca	1	1	PS213200	Spinocerebellar ataxia, autosomal recessive	1	1			['capillary endothelial cell', 'myelinating Schwann cell']
213300	Joubert Syndrome 1	613037	INPP5E	Inpp5e	1	1	PS213300	Joubert syndrome	1	0			['smooth muscle cell']
213700	Cerebrotendinous Xanthomatosis	606530	CYP27A1	Cyp27a1	1	1			1	1
213980	Craniofacial Dysmorphism, Skeletal Anomalies, And Mental Retardationsyndrome	614123	TMCO1	Tmco1	1	1			1	1
214100	Zellweger Syndrome	602136	PEX1	Pex1	1	1	PS214100	Peroxisome biogenesis disorder	1	0			['smooth muscle cell']
214110	Peroxisome Biogenesis Disorder 2a (zellweger)	600414	PEX5	Pex5	1	1	PS214100	Peroxisome biogenesis disorder	1	1			['smooth muscle cell']
214150	Cerebrooculofacioskeletal Syndrome 1	609413	ERCC6	Ercc6	1	1	PS214150	Cerebrooculofacioskeletal syndrome	0	0
214400	Charcot-marie-tooth Disease, Type 4a	606598	GDAP1	Gdap1	1	1	PS118220	Charcot-Marie-Tooth disease	1	0
214450	Griscelli Syndrome, Type 1	160777	MYO5A	Myo5a	1	1	PS214450	Griscelli syndrome	1	1
214500	Chediak-higashi Syndrome	606897	LYST	Lyst	1	1			1	0
214800	Charge Syndrome	608166	SEMA3E	Sema3e	1	1			1	1
214800	Charge Syndrome	608892	CHD7	Chd7	1	1			1	1
215100	Rhizomelic Chondrodysplasia Punctata, Type 1	601757	PEX7	Pex7	1	1	PS214100	Peroxisome biogenesis disorder	0	1			['smooth muscle cell']
215100	Rhizomelic Chondrodysplasia Punctata, Type 1	601757	PEX7	Pex7	1	1	PS215100	Rhizomelic chondrodysplasia punctata	0	1		['slow muscle cell']
215150	Otospondylomegaepiphyseal Dysplasia	120290	COL11A2	Col11a2	1	1	PS184840	Otospondylomegaepiphyseal dysplasia	1	1		['tendon cell']	['tendon cell']
215470	Boucher-neuhauser Syndrome	603197	PNPLA6	Pnpla6	1	1			1	1			['endothelial cell of artery']
216340	Cleidocranial Dysplasia With Micrognathia, Absent Thumbs, And Distal	609390	FIG4	Fig4	1	1			1	0
216360	Coach Syndrome	609884	TMEM67	Tmem67	1	1			0	1			['stromal cell']
216400	Cockayne Syndrome, Type A	609412	ERCC8	Ercc8	1	1			0	0
216550	Cohen Syndrome	607817	VPS13B	Vps13b	1	1			1	0
218000	Agenesis Of The Corpus Callosum With Peripheral Neuropathy	604878	SLC12A6	Slc12a6	1	1			1	1
218040	Costello Syndrome	190020	HRAS	Hras	1	1			1	0
218340	Craniofacial Dysmorphism With Ocular Coloboma, Absent Corpus Callosum,and Aortic Dilatation	615140	C12orf57	Grcc10	1	1			1	1
218400	Craniometaphyseal Dysplasia, Autosomal Recessive	121014	GJA1	Gja1	1	1	PS123000	Craniometaphyseal dysplasia	1	1
218700	Hypothyroidism, Congenital, Nongoitrous, 2	167415	PAX8	Pax8	1	1	PS275200	Hypothyroidism, congenital, nongoitrous	0	0
219100	Cutis Laxa, Autosomal Recessive, Type I	604580	FBLN5	Fbln5	1	1	PS123700	Cutis laxa	1	1
219150	Cutis Laxa, Autosomal Recessive, Type Iiia	138250	ALDH18A1	Aldh18a1	1	1	PS123700	Cutis laxa	1	1
219200	Cutis Laxa, Autosomal Recessive, Type Iia	611716	ATP6V0A2	Atp6v0a2	1	1	PS123700	Cutis laxa	1	0
219200	Cutis Laxa, Autosomal Recessive, Type Iia	611716	ATP6V0A2	Atp6v0a2	1	1	PS212065	Congenital disorders of glycosylation, type I	1	0
219800	Cystinosis, Nephropathic	606272	CTNS	Ctns	1	1			0	0
220110	Mitochondrial Complex Iv Deficiency	185620	SURF1	Surf1	1	1	PS220110	Mitochondrial complex IV deficiency, nuclear-type	1	1		['fast muscle cell', 'slow muscle cell']	['striated muscle cell']
220111	Leigh Syndrome, French Canadian Type	607544	LRPPRC	Lrpprc	1	1	PS220110	Mitochondrial complex IV deficiency, nuclear-type	1	1		['fast muscle cell', 'slow muscle cell']	['striated muscle cell']
220120	D-glyceric Aciduria	610516	GLYCTK	Glyctk	1	1			0	0
220210	Dandy-walker-like Malformation With Atrioventricular Septal Defect	610657	WASHC5	Washc5	1	1	PS220210	Ritscher-Schinzel syndrome	1	0
220500	Doors Syndrome	613577	TBC1D24	Tbc1d24	1	1			0	0
221770	Polycystic Lipomembranous Osteodysplasia With Sclerosing Leukoencephalopathy	604142	TYROBP	Tyrobp	1	1	PS221770	Polycystic lipomembranous osteodysplasia with sclerosing leukoencephaly	1	1
221820	Leukoencephalopathy, Diffuse Hereditary, With Spheroids	164770	CSF1R	Csf1r	1	1			1	1		['macrophage']	['macrophage']
222448	Donnai-barrow Syndrome	600073	LRP2	Lrp2	1	1			1	0		['mesothelial cell']
222600	Diastrophic Dysplasia	606718	SLC26A2	Slc26a2	1	1			1	1		['mast cell']
222700	Lysinuric Protein Intolerance	603593	SLC7A7	Slc7a7	1	1			1	1
222765	Rhizomelic Chondrodysplasia Punctata, Type 2	602744	GNPAT	Gnpat	1	1	PS215100	Rhizomelic chondrodysplasia punctata	1	0		['slow muscle cell']
223800	Dyggve-melchior-clausen Disease	607461	DYM	Dym	1	1			1	1
223900	Neuropathy, Hereditary Sensory And Autonomic, Type Iii	603722	ELP1	Elp1	1	1	PS162400	Hereditary sensory and autonomic neuropathy	0	0		['capillary endothelial cell']
224050	Cerebellar Hypoplasia And Mental Retardation With Or Without Quadrupedallocomotion	192977	VLDLR	Vldlr	1	1	PS224050	Cerebellar ataxia, mental retardation, and dysequilibrium	0	1
224500	Dystonia 2, Torsion, Autosomal Recessive	142622	HPCA	Hpca	1	1	PS128100	Dystonia	0	0
224690	Ear, Patella, Short Stature Syndrome	601902	ORC1	Orc1	1	1	PS224690	Meier-Gorlin syndrome	0	0
225280	Eem Syndrome	114021	CDH3	Cdh3	1	1			0	0
225400	Ehlers-danlos Syndrome, Type Vi	153454	PLOD1	Plod1	1	1	PS130000	Ehlers-Danlos syndrome	1	1		['mesenchymal stem cell', 'tendon cell']	['tendon cell', 'stromal cell']
225750	Aicardi-goutieres Syndrome 1	606609	TREX1	Trex1	1	1	PS225750	Aicardi-Goutieres syndrome	0	1			['blood vessel endothelial cell']
225753	Encephalopathy, Fatal Infantile, With Olivopontocerebellar Hypoplasia	608755	TSEN54	Tsen54	1	1	PS607596	Pontocerebellar hypoplasia	1	0
225790	Proliferative Vasculopathy And Hydranencephaly-hydrocephaly Syndrome	610865	FLVCR2	Flvcr2	1	1			0	0
226600	Epidermolysis Bullosa Dystrophica, Autosomal Recessive	120120	COL7A1	Col7a1	1	1			0	0
226600	Epidermolysis Bullosa Dystrophica, Autosomal Recessive	120353	MMP1	Mmp1a	1	1			0	0
226650	Epidermolysis Bullosa, Junctional, Non-herlitz Type	150292	LAMC2	Lamc2	1	1			1	1			['smooth muscle cell']
226650	Epidermolysis Bullosa, Junctional, Non-herlitz Type	150310	LAMB3	Lamb3	1	1			0	0			['smooth muscle cell']
226650	Epidermolysis Bullosa, Junctional, Non-herlitz Type	113811	COL17A1		1	1			1	0			['smooth muscle cell']
226650	Epidermolysis Bullosa, Junctional, Non-herlitz Type	147557	ITGB4	Itgb4	1	1			1	1			['smooth muscle cell']
226650	Epidermolysis Bullosa, Junctional, Non-herlitz Type	600805	LAMA3	Lama3	1	1			1	0			['smooth muscle cell']
226670	Epidermolysis Bullosa Simplex With Muscular Dystrophy	601282	PLEC	Plec	1	1			1	1
226730	Epidermolysis Bullosa Junctionalis With Pyloric Atresia	147556	ITGA6	Itga6	1	1			1	1		['capillary endothelial cell', 'endothelial cell of vascular tree']	['smooth muscle cell']
226730	Epidermolysis Bullosa Junctionalis With Pyloric Atresia	147557	ITGB4	Itgb4	1	1			1	1		['capillary endothelial cell', 'endothelial cell of vascular tree']	['smooth muscle cell']
226750	Kohlschutter-tonz Syndrome	614574	ROGDI	Rogdi	1	1			1	1
226960	Lowry-wood Syndrome	601428	RNU4ATAC		1	1			0	0
226980	Epiphyseal Dysplasia, Multiple, With Early-onset Diabetes Mellitus	604032	EIF2AK3	Eif2ak3	1	1			1	1			['B cell']
227500	Factor Vii Deficiency	613878	F7	F7	1	1			0	0
227600	Factor X Deficiency	613872	F10	F10	1	1			1	0
228520	Fibrochondrogenesis	120280	COL11A1	Col11a1	1	1	PS228520	Fibrochondrogenesis	1	1		['tendon cell']
228600	Fibromatosis, Juvenile Hyaline	608041	ANTXR2	Antxr2	1	1			1	1			['skeletal muscle fibroblast; fibroblast', 'skeletal muscle fibroblast; fibroblast.1']
229050	Folic Acid, Transport Defect Involving	611672	SLC46A1	Slc46a1	1	1			0	0
229070	Hypogonadotropic Hypogonadism 24 Without Anosmia	136530	FSHB	Fshb	1	1	PS147950	Hypogonadotropic hypogonadism with or without anosmia	0	0
229700	Fructose-1,6-bisphosphatase Deficiency	611570	FBP1	Fbp1	1	1			1	0
230000	Fucosidosis	612280	FUCA1	Fuca1	1	1			1	1
230350	Galactose Epimerase Deficiency	606953	GALE	Gale	1	1	PS230400	Galactosemia	1	0
230450	Gamma-glutamylcysteine Synthetase Deficiency, Hemolytic Anemia Dueto	606857	GCLC	Gclc	1	1			1	1
230600	Gm1-gangliosidosis, Type Ii	611458	GLB1	Glb1	1	1			1	1
230650	Gm1-gangliosidosis, Type Iii	611458	GLB1	Glb1	1	1			1	1
230900	Gaucher Disease, Type Ii	606463	GBA	Gba	1	1			0	1
231000	Gaucher Disease, Type Iii	606463	GBA	Gba	1	1			0	1
231050	Geleophysic Dysplasia	612277	ADAMTSL2	Adamtsl2	1	1	PS231050	Geleophysic dysplasia	1	0		['tendon cell']
231070	Geroderma Osteodysplastica	607983	GORAB	Gorab	1	1			0	0
231530	3-@hydroxyacyl-coa Dehydrogenase Deficiency	601609	HADH	Hadh	1	1			1	1
231550	Achalasia-addisonianism-alacrima Syndrome	605378	AAAS	Aaas	1	1			1	0
231670	Glutaric Acidemia I	608801	GCDH	Gcdh	1	1			1	1
231680	Multiple Acyl-coa Dehydrogenase Deficiency	231675	ETFDH	Etfdh	1	1			1	1		['fast muscle cell', 'slow muscle cell']
231680	Multiple Acyl-coa Dehydrogenase Deficiency	608053	ETFA	Etfa	1	1			1	1		['fast muscle cell', 'slow muscle cell']
231680	Multiple Acyl-coa Dehydrogenase Deficiency	130410	ETFB	Etfb	1	1			1	1		['fast muscle cell', 'slow muscle cell']
232200	Glycogen Storage Disease Ia	613742	G6PC1	G6pc	1	1			0	0
232300	Glycogen Storage Disease Ii	606800	GAA	Gaa	1	1			1	1
232400	Glycogen Storage Disease Iii	610860	AGL	Agl	1	1			1	0		['fast muscle cell']
232500	Glycogen Storage Disease Iv	607839	GBE1	Gbe1	1	1			1	1		['slow muscle cell']
232600	Glycogen Storage Disease V	608455	PYGM	Pygm	1	1			1	1		['fast muscle cell']	['striated muscle cell']
232800	Glycogen Storage Disease Vii	610681	PFKM	Pfkm	1	1			1	1		['fast muscle cell']
233400	Gonadal Dysgenesis, Xx Type, With Deafness	601860	HSD17B4	Hsd17b4	1	1	PS233400	Perrault syndrome	1	1
233910	Gtp Cyclohydrolase I Deficiency	600225	GCH1	Gch1	1	1			1	1
234050	Trichothiodystrophy, Nonphotosensitive 1	609188	MPLKIP	Mplkip	1	1	PS601675	Trichothiodystrophy	1	0
234200	Neurodegeneration With Brain Iron Accumulation 1	606157	PANK2	Pank2	1	1	PS234200	Neurodegeneration with brain iron accumulation	1	1
234500	Hartnup Disorder	608893	SLC6A19	Slc6a19	1	1			0	0
235510	Hennekam Lymphangiectasia-lymphedema Syndrome	612753	CCBE1	Ccbe1	1	1	PS235510	Hennekam lymphangiectasia-lymphedema syndrome	1	1			['tendon cell']
235730	Mowat-wilson Syndrome	605802	ZEB2	Zeb2	1	1			1	1
236250	Homocystinuria Due To Deficiency Of N(5,10)-methylenetetrahydrofolatereductase Activity	607093	MTHFR	Mthfr	1	1			1	0
236270	Homocystinuria-megaloblastic Anemia Due To Defect In Cobalamin Metabolism,cble Complementation Type	602568	MTRR	Mtrr	1	1			1	1
236500	Multinucleated Neurons, Anhydramnios, Renal Dysplasia, Cerebellar Hypoplasia, And Hydranencephaly	610000	CEP55	Cep55	1	1			0	0
236670	Muscular Dystrophy-dystroglycanopathy (congenital With Brain And Eye	607423	POMT1	Pomt1	1	1	PS236670	Muscular dystrophy-dystroglycanopathy, type A	0	0
236680	Hydrolethalus Syndrome 1	610693	HYLS1	Hyls1	1	1	PS236680	Hydrolethalus syndrome	0	0
236792	L-2-hydroxyglutaric Aciduria	609584	L2HGDH	L2hgdh	1	1			0	0
236800	Hydroxykynureninuria	605197	KYNU	Kynu	1	1			1	0
238970	Hyperornithinemia-hyperammonemia-homocitrullinuria Syndrome	603861	SLC25A15	Slc25a15	1	1			0	0
239000	Paget Disease, Juvenile	602643	TNFRSF11B	Tnfrsf11b	1	1	PS167250	Paget disease of bone	1	1
239200	Hyperparathyroidism, Neonatal Severe	601199	CASR	Casr	1	1	PS145000	Hyperparathyroidism	0	0
239300	Hyperphosphatasia With Mental Retardation Syndrome 1	610274	PIGV	Pigv	1	1	PS239300	Hyperphosphatasia with mental retardation syndrome	0	0
239500	Hyperprolinemia, Type I	606810	PRODH	Prodh	1	1			0	1			['smooth muscle cell']
240800	Hypoglycemia Of Infancy, Leucine-sensitive	600509	ABCC8	Abcc8	1	1			0	0
241200	Bartter Syndrome, Antenatal, Type 2	600359	KCNJ1	Kcnj1	1	1	PS601678	Bartter syndrome	0	0
241410	Hypoparathyroidism-retardation-dysmorphism Syndrome	604934	TBCE	Tbce	1	1			1	0
241500	Hypophosphatasia, Infantile	171760	ALPL	Alpl	1	1			0	1			['endothelial cell of artery']
241510	Hypophosphatasia, Childhood	171760	ALPL	Alpl	1	1			0	1			['endothelial cell of artery']
241530	Hypophosphatemic Rickets With Hypercalciuria, Hereditary	609826	SLC34A3	Slc34a3	1	1			0	0
242300	Ichthyosis, Congenital, Autosomal Recessive 1	190195	TGM1	Tgm1	1	1	PS242300	Ichthyosis, congenital, autosomal recessive	1	0		['mesothelial cell']
242840	Immunodeficiency With Cleft Lip/palate, Cataract, Hypopigmentation,and Absent Corpus Callosum	615068	EPG5	Epg5	1	1			1	0
242860	Immunodeficiency-centromeric Instability-facial Anomalies Syndrome1	602900	DNMT3B	Dnmt3b	1	1	PS242860	Immunodeficiency-centromeric instability-facial anomalies	0	0
243310	Baraitser-winter Syndrome 1	102630	ACTB	Actb	1	1	PS243310	Baraitser-Winter syndrome	1	1
243605	Stromme Syndrome	600236	CENPF	Cenpf	1	1			0	0
243800	Johanson-blizzard Syndrome	605981	UBR1	Ubr1	1	1			1	1
244450	Kaufman Oculocerebrofacial Syndrome	608047	UBE3B	Ube3b	1	1			1	1
244460	Kenny-caffey Syndrome, Type 1	604934	TBCE	Tbce	1	1	PS127000	Kenny-Caffey syndrome	1	0
245200	Krabbe Disease	606890	GALC	Galc	1	1			1	1
245340	Erythrocyte Lactate Transporter Defect	600682	SLC16A1	Slc16a1	1	1			1	1			['smooth muscle cell']
245348	Pyruvate Dehydrogenase E2 Deficiency	608770	DLAT	Dlat	1	1	PS312170	Pyruvate dehydrogenase complex deficiency	1	1		['fast muscle cell', 'slow muscle cell']	['striated muscle cell']
245349	Pyruvate Dehydrogenase E3-binding Protein Deficiency	608769	PDHX	Pdhx	1	1	PS312170	Pyruvate dehydrogenase complex deficiency	1	0		['fast muscle cell', 'slow muscle cell']	['striated muscle cell']
245400	Mitochondrial Dna Depletion Syndrome 9 (encephalomyopathic Type With Methylmalonic Aciduria)	611224	SUCLG1	Suclg1	1	1	PS603041	Mitochondrial DNA depletion syndrome	1	1	Yes
245600	Multiple Joint Dislocations, Short Stature, Craniofacial Dysmorphism, With Or Without Congenital Heart Defects	606374	B3GAT3	B3gat3	1	1			1	1
245800	Laurence-moon Syndrome	603197	PNPLA6	Pnpla6	1	1			1	1			['endothelial cell of artery']
246200	Donohue Syndrome	147670	INSR	Insr	1	1			1	1			['vein endothelial cell; endothelial stalk cell']
246450	3-hydroxy-3-methylglutaryl-coa Lyase Deficiency	613898	HMGCL	Hmgcl	1	1			1	1
246900	Dihydrolipoamide Dehydrogenase Deficiency	238331	DLD	Dld	1	1	PS248600	Maple syrup urine disease	1	1
248000	Macrocephaly/megalencephaly Syndrome, Autosomal Recessive	612655	TBC1D7	Tbc1d7	1	1			1	1
248250	Hypomagnesemia 3, Renal	603959	CLDN16	Cldn16	1	1	PS602014	Hypomagnesemia	0	0
248340	3mc Syndrome 3	607620	COLEC10	Colec10	1	1	PS257920	3MC syndrome	0	0			['pericyte cell']
248360	Malonyl-coa Decarboxylase Deficiency	606761	MLYCD	Mlycd	1	1			1	1
248370	Mandibuloacral Dysplasia	150330	LMNA	Lmna	1	1	PS248370	Mandibuloacral dysplasia with lipodystrophy	1	1	Yes
248500	Mannosidosis, Alpha B, Lysosomal	609458	MAN2B1	Man2b1	1	1			0	1			['macrophage']
248510	Mannosidosis, Beta A, Lysosomal	609489	MANBA	Manba	1	1			1	1
248600	Maple Syrup Urine Disease	248610	DBT	Dbt	1	1	PS248600	Maple syrup urine disease	1	0
248600	Maple Syrup Urine Disease	248611	BCKDHB	Bckdhb	1	1	PS248600	Maple syrup urine disease	1	1
248600	Maple Syrup Urine Disease	608348	BCKDHA	Bckdha	1	1	PS248600	Maple syrup urine disease	0	1
248700	Marden-walker Syndrome	613629	PIEZO2	Piezo2	1	1			1	0
248800	Marinesco-sjogren Syndrome	608005	SIL1	Sil1	1	1			1	1	Yes
248900	Mast Syndrome	608181	SPG21	Spg21	1	1	PS303350	Spastic paraplegia	1	1
249900	Metachromatic Leukodystrophy Due To Saposin B Deficiency	176801	PSAP	Psap	1	1			1	1
250100	Metachromatic Leukodystrophy	607574	ARSA	Arsa	1	1			1	1
250220	Spondylometaphyseal Dysplasia, Sedaghatian Type	138322	GPX4	Gpx4	1	1	PS184255	Spondylometaphyseal dysplasia	1	1
250620	3-@hydroxyisobutyryl-coa Hydrolase Deficiency	610690	HIBCH	Hibch	1	1			1	1
250800	Methemoglobinemia Due To Deficiency Of Methemoglobin Reductase	613213	CYB5R3		1	1			1	0
250940	Homocystinuria-megaloblastic Anemia, Cblg Complementation Type	156570	MTR	Mtr	1	1			1	1
250950	3-methylglutaconic Aciduria, Type I	600529	AUH	Auh	1	1	PS250950	3-Methylglutaconic aciduria	1	1
251000	Methylmalonic Aciduria Due To Methylmalonyl-coa Mutase Deficiency	609058	MMUT	Mmut	1	1			1	0
251100	Methylmalonic Aciduria, Cbla Type	607481	MMAA	Mmaa	1	1			0	0
251110	Methylmalonic Aciduria, Cblb Type	607568	MMAB	Mmab	1	1			1	0
251260	Nijmegen Breakage Syndrome	602667	NBN	Nbn	1	1			1	1
251280	Microcephaly, Seizures, Spasticity, And Brain Calcifications	605622	PCDH12	Pcdh12	1	1	PS251280	Diencephalic-mesencephalic junction dysplasia syndrome	1	0		['capillary endothelial cell']
251290	Pseudo-torch Syndrome	602876	OCLN	Ocln	1	1	PS251290	Pseudo-TORCH syndrome	1	1
251300	Galloway-mowat Syndrome	616144	WDR73	Wdr73	1	1	PS251300	Galloway-Mowat syndrome	1	1
251450	Desbuquois Dysplasia 1	613165	CANT1	Cant1	1	1	PS251450	Desbuquois dysplasia	1	1
251880	Mitochondrial Dna Depletion Syndrome, Hepatocerebral Form	601465	DGUOK	Dguok	1	1	PS603041	Mitochondrial DNA depletion syndrome	1	1	Yes
251900	Mitochondrial Myopathy, Episodic, With Optic Atrophy And Reversible Leukoencephalopathy	614585	FDX2	Fdx2	1	1			0	0
251950	Mitochondrial Myopathy With Lactic Acidosis	612123	PNPLA8	Pnpla8	1	1			1	1
252010	Mitochondrial Complex I Deficiency	602694	NDUFS4	Ndufs4	1	1	PS252010	Mitochondrial complex I deficiency, nuclear type	1	1		['fast muscle cell', 'slow muscle cell']	['striated muscle cell']
252011	Mitochondrial Complex Ii Deficiency	600857	SDHA	Sdha	1	1	PS252011	Mitochondrial complex II deficiency, nuclear type	1	1
252150	Molybdenum Cofactor Deficiency	603707	MOCS1		1	1	PS252150	Molybdenum cofactor deficiency	1	0
252160	Molybdenum Cofactor Deficiency, Complementation Group B	603708	MOCS2	Mocs2	1	1	PS252150	Molybdenum cofactor deficiency	1	1
252500	Mucolipidosis Ii Alpha/beta	607840	GNPTAB	Gnptab	1	1			1	0
252650	Mucolipidosis Iv	605248	MCOLN1	Mcoln1	1	1			1	0
252940	Mucopolysaccharidosis Type Iiid	607664	GNS	Gns	1	1			1	1
253200	Mucopolysaccharidosis Type Vi	611542	ARSB	Arsb	1	1	PS607014	Mucopolysaccharidoses	1	1			['macrophage']
253220	Mucopolysaccharidosis, Type Vii	611499	GUSB	Gusb	1	1	PS607014	Mucopolysaccharidoses	1	1			['macrophage']
253260	Biotinidase Deficiencymultiple Carboxylase Deficiency, Late-onset	609019	BTD	Btd	1	1			1	1
253270	Holocarboxylase Synthetase Deficiency	609018	HLCS	Hlcs	1	1			0	0
253280	Muscular Dystrophy-dystroglycanopathy (congenital With Brain And Eye	606822	POMGNT1	Pomgnt1	1	1	PS236670	Muscular dystrophy-dystroglycanopathy, type A	1	1
253290	Multiple Pterygium Syndrome, Lethal Type	100690	CHRNA1	Chrna1	1	1			1	1		['skeletal muscle satellite stem cell']	['skeletal muscle satellite cell']
253290	Multiple Pterygium Syndrome, Lethal Type	100720	CHRND	Chrnd	1	1			0	0		['skeletal muscle satellite stem cell']	['skeletal muscle satellite cell']
253290	Multiple Pterygium Syndrome, Lethal Type	100730	CHRNG	Chrng	1	1			0	0		['skeletal muscle satellite stem cell']	['skeletal muscle satellite cell']
253300	Spinal Muscular Atrophy, Type I	600354	SMN1	Smn1	1	1			0	1
253310	Lethal Congenital Contracture Syndrome 1	603371	GLE1	Gle1	1	1	PS253310	Lethal congenital contracture syndrome	0	1
253400	Spinal Muscular Atrophy, Type Iii	601627	SMN2	Smn1	1	1			0	1
253400	Spinal Muscular Atrophy, Type Iii	600354	SMN1	Smn1	1	1			0	1
253550	Spinal Muscular Atrophy, Type Ii	600354	SMN1	Smn1	1	1			0	1
253600	Muscular Dystrophy, Limb-girdle, Type 2a	114240	CAPN3	Capn3	1	1	PS253600	Muscular dystrophy, limb-girdle, autosomal recessive	0	1	Yes
253601	Muscular Dystrophy, Limb-girdle, Type 2b	603009	DYSF	Dysf	1	1	PS253600	Muscular dystrophy, limb-girdle, autosomal recessive	1	1	Yes
253700	Muscular Dystrophy, Limb-girdle, Type 2c	608896	SGCG	Sgcg	1	1	PS253600	Muscular dystrophy, limb-girdle, autosomal recessive	1	1	Yes
253800	Muscular Dystrophy-dystroglycanopathy (congenital With Brain And Eyeanomalies), Type A, 4	607440	FKTN	Fktn	1	1	PS236670	Muscular dystrophy-dystroglycanopathy, type A	1	0
254090	Ullrich Congenital Muscular Dystrophy 1	120250	COL6A3	Col6a3	1	1	PS253600	Muscular dystrophy, limb-girdle, autosomal recessive	1	1	Yes
254090	Ullrich Congenital Muscular Dystrophy 1	120250	COL6A3	Col6a3	1	1	PS254090	Ullrich congenital muscular dystrophy	1	1	Yes	['mesenchymal stem cell', 'tendon cell']	['tendon cell', 'stromal cell', 'skeletal muscle fibroblast; fibroblast', 'skeletal muscle fibroblast; fibroblast.1']
254090	Ullrich Congenital Muscular Dystrophy 1	120220	COL6A1	Col6a1	1	1	PS253600	Muscular dystrophy, limb-girdle, autosomal recessive	1	1	Yes
254090	Ullrich Congenital Muscular Dystrophy 1	120220	COL6A1	Col6a1	1	1	PS254090	Ullrich congenital muscular dystrophy	1	1	Yes	['mesenchymal stem cell', 'tendon cell']	['tendon cell', 'stromal cell', 'skeletal muscle fibroblast; fibroblast', 'skeletal muscle fibroblast; fibroblast.1']
254090	Ullrich Congenital Muscular Dystrophy 1	120240	COL6A2	Col6a2	1	1	PS253600	Muscular dystrophy, limb-girdle, autosomal recessive	1	1	Yes
254090	Ullrich Congenital Muscular Dystrophy 1	120240	COL6A2	Col6a2	1	1	PS254090	Ullrich congenital muscular dystrophy	1	1	Yes	['mesenchymal stem cell', 'tendon cell']	['tendon cell', 'stromal cell', 'skeletal muscle fibroblast; fibroblast', 'skeletal muscle fibroblast; fibroblast.1']
254110	Muscular Dystrophy, Limb-girdle, Type 2h	602290	TRIM32	Trim32	1	1	PS253600	Muscular dystrophy, limb-girdle, autosomal recessive	1	1	Yes
254130	Miyoshi Muscular Dystrophy 1	603009	DYSF	Dysf	1	1	PS254130	Miyoshi muscular dystrophy	1	1	Yes
254210	Myasthenic Syndrome, Congenital, Associated With Episodic Apnea	118490	CHAT	Chat	1	1	PS601462	Myasthenic syndrome, congenital	0	0	Yes
254300	Myasthenia, Limb-girdle, Familial	610285	DOK7	Dok7	1	1	PS601462	Myasthenic syndrome, congenital	0	0	Yes
254940	Carey-fineman-ziter Syndrome	615345	MYMK	Mymk	1	1			0	0
255100	Lipid Storage Myopathy Due To Flavin Adenine Dinucleotide Synthetase Deficiency	610595	FLAD1	Flad1	1	1			1	0
255110	Carnitine Palmitoyltransferase Ii Deficiency, Late-onset	600650	CPT2	Cpt2	1	1			0	0	Yes
255120	Carnitine Palmitoyltransferase I Deficiency	600528	CPT1A	Cpt1a	1	1			1	1
255125	Myopathy With Exercise Intolerance, Swedish Type	611911	ISCU	Iscu	1	1			1	1
255160	Myopathy, Myosin Storage, Autosomal Recessive	160760	MYH7	Myh7	1	1			1	0		['slow muscle cell']
255200	Myopathy, Centronuclear, Autosomal Recessive	601248	BIN1	Bin1	1	1	PS160150	Myopathy, centronuclear	1	1	Yes	['fast muscle cell', 'slow muscle cell']
255310	Myopathy, Congenital, With Fiber-type Disproportion	606210	SELENON	Selenon	1	1			1	0			['striated muscle cell']
255310	Myopathy, Congenital, With Fiber-type Disproportion	191030	TPM3	Tpm3	1	1			1	1			['striated muscle cell']
255310	Myopathy, Congenital, With Fiber-type Disproportion	102610	ACTA1	Acta1	1	1			1	1			['striated muscle cell']
255320	Minicore Myopathy With External Ophthalmoplegia	180901	RYR1	Ryr1	1	1			1	1		['fast muscle cell']
255600	Myosclerosis, Autosomal Recessive	120240	COL6A2	Col6a2	1	1			1	1			['skeletal muscle fibroblast; fibroblast']
255700	Myotonia Congenita, Autosomal Recessive	118425	CLCN1	Clcn1	1	1			0	0
255800	Schwartz-jampel Syndrome, Type 1	142461	HSPG2	Hspg2	1	1			1	1			['stromal cell']
255995	Myopathy, Congenital, Bailey-bloch	615521	STAC3	Stac3	1	1			1	1
256030	Nemaline Myopathy 2	161650	NEB	Neb	1	1	PS161800	Nemaline myopathy	1	1	Yes	['fast muscle cell', 'slow muscle cell']	['striated muscle cell']
256040	Proteasome-associated Autoinflammatory Syndrome 1 And Digenic Forms	177046	PSMB8	Psmb8	1	1	PS256040	Proteosome-associated autoinflammatory syndrome	1	1			['monocyte-derived dendritic cell']
256500	Netherton Syndrome	605010	SPINK5	Spink5	1	1			0	0
256520	Neu-laxova Syndrome	606879	PHGDH	Phgdh	1	1	PS256520	Neu-Laxova syndrome	1	1	Yes
256550	Neuraminidase Deficiency	608272	NEU1	Neu1	1	1			1	1
256600	Neuroaxonal Dystrophy, Infantile	603604	PLA2G6	Pla2g6	1	1	PS234200	Neurodegeneration with brain iron accumulation	0	0
256730	Ceroid Lipofuscinosis, Neuronal, 1	600722	PPT1	Ppt1	1	1	PS256730	Ceroid lipofuscinoses	1	1		['macrophage']
256810	Navajo Neurohepatopathy	137960	MPV17	Mpv17	1	1	PS603041	Mitochondrial DNA depletion syndrome	1	1	Yes
256840	Neuropathy, Hereditary Sensory, With Spastic Paraplegia, Autosomal	610150	CCT5	Cct5	1	1			1	1
256850	Giant Axonal Neuropathy 1	605379	GAN	Gan	1	1	PS256850	Giant axonal neuropathy	1	0
257200	Niemann-pick Disease, Type A	607608	SMPD1	Smpd1	1	1			1	1
257220	Niemann-pick Disease, Type C1	607623	NPC1	Npc1	1	1			1	1
257300	Mosaic Variegated Aneuploidy Syndrome 1	602860	BUB1B	Bub1b	1	1	PS257300	Mosaic variegated aneuploidy syndrome	0	0
258450	Progressive External Ophthalmoplegia With Mitochondrial Dna Deletions,autosomal Recessive	174763	POLG	Polg	1	1	PS157640	Progressive external ophthalmoplegia with mtDNA deletions	1	1
258480	Opsismodysplasia	600829	INPPL1	Inppl1	1	1			1	1
258501	3-methylglutaconic Aciduria, Type Iii	606580	OPA3	Opa3	1	1	PS250950	3-Methylglutaconic aciduria	1	1
258870	Ornithine Aminotransferase Deficiency	613349	OAT	Oat	1	1			1	1
259050	Primrose Syndrome	606025	ZBTB20	Zbtb20	1	1			1	1
259450	Bruck Syndrome 1	607063	FKBP10	Fkbp10	1	1			1	1
259600	Multicentric Osteolysis, Nodulosis, And Arthropathy	120360	MMP2	Mmp2	1	1			1	1		['mesenchymal stem cell']
259700	Osteopetrosis, Autosomal Recessive 1	604592	TCIRG1	Tcirg1	1	1	PS259700	Osteopetrosis, autosomal recessive	1	1		['macrophage']
259710	Osteopetrosis, Autosomal Recessive 2	602642	TNFSF11	Tnfsf11	1	1	PS259700	Osteopetrosis, autosomal recessive	0	1		['macrophage']
259720	Osteopetrosis, Autosomal Recessive 5	607649	OSTM1	Ostm1	1	1	PS259700	Osteopetrosis, autosomal recessive	1	1		['macrophage']
259770	Osteoporosis-pseudoglioma Syndrome	603506	LRP5	Lrp5	1	1			1	1
259775	Raine Syndrome	611061	FAM20C	Fam20c	1	1			1	1
260300	Parkinsonian-pyramidal Syndrome	605648	FBXO7	Fbxo7	1	1	PS168600	Parkinson disease	1	1
260565	Peho Syndrome	604500	ZNHIT3	Znhit3	1	1			1	1
260600	Leukodystrophy, Hypomyelinating, 3	603605	AIMP1	Aimp1	1	1	PS312080	Leukodystrophy, hypomyelinating	1	1
260660	Pelviscapular Dysplasia	604127	TBX15	Tbx15	1	1			1	1
261515	D-bifunctional Protein Deficiency	601860	HSD17B4	Hsd17b4	1	1			1	1
261540	Peters-plus Syndrome	610308	B3GLCT	B3glct	1	1			1	0
261630	Phenylketonuria Ii	612676	QDPR	Qdpr	1	1			1	1		['fast muscle cell']	['endothelial cell of lymphatic vessel']
261640	6-@pyruvoyltetrahydropterin Synthase	612719	PTS	Pts	1	1			1	1
261670	Phosphoglycerate Mutase, Muscle, Deficiency Of	612931	PGAM2	Pgam2	1	1			1	1		['fast muscle cell']	['striated muscle cell']
261740	Glycogen Storage Disease Of Heart, Lethal Congenital	602743	PRKAG2	Prkag2	1	1			1	1
261750	Glycogen Storage Disease Ixb	172490	PHKB	Phkb	1	1			1	1
263210	Gillessen-kaesbach-nishimura Syndrome	606941	ALG9	Alg9	1	1			0	0
263570	Polyglucosan Body Disease, Adult Form	607839	GBE1	Gbe1	1	1			1	1
263700	Porphyria, Congenital Erythropoietic	606938	UROS	Uros	1	1			1	0
263800	Gitelman Syndrome	600968	SLC12A3	Slc12a3	1	1			0	0
264070	Hyperphenylalaninemia, Bh4-deficient, D	126090	PCBD1	Pcbd1	1	1			1	1
264090	Progeroid Syndrome, Neonatal	614258	POLR3A	Polr3a	1	1	PS176670	Progeria	1	0
264470	Peroxisomal Acyl-coa Oxidase Deficiency	609751	ACOX1	Acox1	1	1			1	1
264700	Vitamin D-dependent Rickets, Type I	609506	CYP27B1	Cyp27b1	1	1			0	0
265000	Multiple Pterygium Syndrome, Escobar Variant	100730	CHRNG	Chrng	1	1			0	0
265050	Carnevale Syndrome	612502	COLEC11	Colec11	1	1	PS257920	3MC syndrome	0	1			['pericyte cell']
265380	Alveolar Capillary Dysplasia With Misalignment Of Pulmonary Veins	601089	FOXF1	Foxf1	1	1			0	0
265900	Pyle Disease	606570	SFRP4	Sfrp4	1	1			1	1		['tendon cell']	['skeletal muscle fibroblast; fibroblast', 'skeletal muscle fibroblast; fibroblast.1']
266100	Epilepsy, Pyridoxine-dependent	107323	ALDH7A1	Aldh7a1	1	1			1	1
266130	Glutathione Synthetase Deficiency	601002	GSS	Gss	1	1			1	0
266150	Pyruvate Carboxylase Deficiency	608786	PC	Pcx	1	1			0	0
266265	Congenital Disorder Of Glycosylation, Type Iic	605881	SLC35C1	Slc35c1	1	1	PS212066	Congenital disorders of glycosylation, type II	0	0
266500	Refsum Disease	602026	PHYH	Phyh	1	1			1	1
266510	Refsum Disease, Infantile Form	601758	PEX12	Pex12	1	1	PS214100	Peroxisome biogenesis disorder	0	0			['smooth muscle cell']
266920	Short-rib Thoracic Dysplasia 9 With Or Without Polydactyly	614620	IFT140	Ift140	1	1	PS208500	Short-rib thoracic dysplasia	0	0
267000	Perlman Syndrome	614184	DIS3L2	Dis3l2	1	1			1	0		['cd8-positive, alpha-beta t cell']
267010	Meckel Syndrome, Type 7	608002	NPHP3	Nphp3	1	1	PS249000	Meckel syndrome	1	0
268130	Revesz Syndrome	604319	TINF2	Tinf2	1	1	PS127550	Dyskeratosis congenita	1	1
268200	Rhabdomyolysis, Acute Recurrent	605518	LPIN1	Lpin1	1	1			1	1
268300	Roberts Syndrome	609353	ESCO2	Esco2	1	1			0	0
268310	Robinow Syndrome, Autosomal Recessive	602337	ROR2	Ror2	1	1	PS268310	Robinow syndrome	1	0
268800	Sandhoff Disease	606873	HEXB	Hexb	1	1			1	1
269150	Schinzel-giedion Midface-retraction Syndrome	611060	SETBP1	Setbp1	1	1			1	1
269500	Sclerosteosis	605740	SOST	Sost	1	1	PS269500	Sclerosteosis	0	0		['skeletal muscle satellite stem cell']
269700	Lipodystrophy, Congenital Generalized, Type 2	606158	BSCL2	Bscl2	1	1	PS608594	Lipodystrophy, congenital generalized	0	1
269920	Infantile Sialic Acid Storage Disorder	604322	SLC17A5	Slc17a5	1	1			1	0
270200	Sjogren-larsson Syndrome	609523	ALDH3A2	Aldh3a2	1	1			1	1			['capillary endothelial cell']
270400	Smith-lemli-opitz Syndrome	602858	DHCR7	Dhcr7	1	1			1	1
270550	Spastic Ataxia, Charlevoix-saguenay Type	604490	SACS		1	1	PS108600	Spastic ataxia	1	0		['skeletal muscle satellite stem cell']
270685	Spastic Paraplegia 17	606158	BSCL2	Bscl2	1	1	PS303350	Spastic paraplegia	0	1
270700	Spastic Paraplegia 15, Autosomal Recessive	612012	ZFYVE26	Zfyve26	1	1	PS303350	Spastic paraplegia	1	0
270750	Spastic Paraplegia 23	612666	DSTYK	Dstyk	1	1	PS303350	Spastic paraplegia	1	1
270800	Spastic Paraplegia 5a, Autosomal Recessive	603711	CYP7B1	Cyp7b1	1	1	PS303350	Spastic paraplegia	1	1
271150	Spinal Muscular Atrophy, Type Iv	600354	SMN1	Smn1	1	1			0	1
271245	Infantile-onset Spinocerebellar Ataxia	606075	TWNK	Twnk	1	1	PS603041	Mitochondrial DNA depletion syndrome	1	0	Yes
271640	Spondyloepimetaphyseal Dysplasia With Joint Laxity, Type 1, With Orwithout Fractures	615291	B3GALT6	B3galt6	1	1	PS271640	Spondyloepimetaphyseal dysplasia with joint laxity	1	1
271665	Spondylometaepiphyseal Dysplasia, Short Limb-hand Type	191311	DDR2	Ddr2	1	1			1	1			['skeletal muscle fibroblast; fibroblast.1']
271900	Canavan Disease	608034	ASPA	Aspa	1	1			1	1
271930	Striatonigral Degeneration, Infantile	605815	NUP62	Nup62	1	1	PS271930	Striatonigral degeneration	1	1
271980	Succinic Semialdehyde Dehydrogenase Deficiency	610045	ALDH5A1	Aldh5a1	1	1			1	0
272200	Multiple Sulfatase Deficiency	607939	SUMF1	Sumf1	1	1			1	1
272300	Sulfocysteinuria	606887	SUOX	Suox	1	1			0	0
272430	Cold-induced Sweating Syndrome 1	604237	CRLF1	Crlf1	1	1	PS272430	Cold-induced sweating syndrome	1	1			['skeletal muscle satellite cell']
272460	Spondylocarpotarsal Synostosis Syndrome	603381	FLNB	Flnb	1	1			1	1
272750	Tay-sachs Disease, Ab Variant	613109	GM2A	Gm2a	1	1			1	1			['monocyte-derived dendritic cell']
272800	Tay-sachs Disease	606869	HEXA	Hexa	1	1			1	1
273395	Tetra-amelia, Autosomal Recessive	165330	WNT3	Wnt3	1	1			0	0
273750	Three M Syndrome 1	609577	CUL7	Cul7	1	1	PS273750	Three M syndrome	0	1		['skeletal muscle satellite stem cell']
274000	Thrombocytopenia-absent Radius Syndrome	605313	RBM8A	Rbm8a	1	1			1	1
274270	Dihydropyrimidine Dehydrogenase Deficiency	612779	DPYD	Dpyd	1	1			1	0
274400	Thyroid Hormonogenesis, Genetic Defect In, 1	601843	SLC5A5	Slc5a5	1	1			0	0
275100	Hypothyroidism, Congenital, Nongoitrous, 4	188540	TSHB	Tshb	1	1	PS275200	Hypothyroidism, congenital, nongoitrous	0	0
275210	Tight Skin Contracture Syndrome, Lethal	606480	ZMPSTE24	Zmpste24	1	1			1	1
275210	Tight Skin Contracture Syndrome, Lethal	150330	LMNA	Lmna	1	1			1	1
275350	Transcobalamin Ii Deficiency	613441	TCN2	Tcn2	1	1			1	1			['endothelial cell of lymphatic vessel']
275400	Oliver-mcfarlane Syndrome	603197	PNPLA6	Pnpla6	1	1			1	1			['endothelial cell of artery']
275630	Chanarin-dorfman Syndrome	604780	ABHD5	Abhd5	1	1			1	1
275900	Spastic Paraplegia 20, Autosomal Recessive	607111	SPART		1	1	PS303350	Spastic paraplegia	1	0
276300	Mismatch Repair Cancer Syndrome	120436	MLH1	Mlh1	1	1	PS276300	Mismatch repair cancer syndrome	1	0
276820	Ulna And Fibula, Absence Of, With Severe Limb Deficiency	601570	WNT7A	Wnt7a	1	1			0	0
277170	Varadi-papp Syndrome	614571	CPLANE1	Cplane1	1	1	PS311200	Orofaciodigital syndrome	1	0
277380	Methylmalonic Aciduria And Homocystinuria, Cblf Type	612625	LMBRD1	Lmbrd1	1	1			1	1
277400	Methylmalonic Aciduria And Homocystinuria, Cblc Type	609831	MMACHC	Mmachc	1	1			0	0
277400	Methylmalonic Aciduria And Homocystinuria, Cblc Type	176763	PRDX1	Prdx1	1	1			1	1
277410	Methylmalonic Aciduria And Homocystinuria, Cbld Type	611935	MMADHC	Mmadhc	1	1			1	1
277440	Vitamin D-dependent Rickets, Type Ii	601769	VDR	Vdr	1	1			1	1			['monocyte-derived dendritic cell']
277470	Pontocerebellar Hypoplasia, Type 2a	608755	TSEN54	Tsen54	1	1	PS607596	Pontocerebellar hypoplasia	1	0
277580	Waardenburg-shah Syndrome	131244	EDNRB	Ednrb	1	1	PS193500	Waardenburg syndrome	1	1		['endothelial cell of lymphatic vessel', 'pericyte cell']
277590	Weaver Syndrome	601573	EZH2	Ezh2	1	1			1	1
278250	Wrinkly Skin Syndrome	611716	ATP6V0A2	Atp6v0a2	1	1			1	0
278300	Xanthinuria, Type I	607633	XDH	Xdh	1	1	PS278300	Xanthinuria	0	1
278700	Xeroderma Pigmentosum, Complementation Group A	611153	XPA	Xpa	1	1			1	1
278730	Xeroderma Pigmentosum, Complementation Group D	126340	ERCC2	Ercc2	1	1			0	0
278760	Xeroderma Pigmentosum, Complementation Group F	133520	ERCC4	Ercc4	1	1			1	1
278780	Xeroderma Pigmentosum, Complementation Group G	133530	ERCC5	Ercc5	1	1			1	1
278800	De Sanctis-cacchione Syndrome	609413	ERCC6	Ercc6	1	1			0	0
280000	Zunich Neuroectodermal Syndrome	605947	PIGL	Pigl	1	1			0	0
300004	Corpus Callosum, Agenesis Of, With Abnormal Genitalia	300382	ARX	Arx	1	1			1	0		['fast muscle cell']
300048	Intestinal Pseudoobstruction, Neuronal, Chronic Idiopathic, X-linked	300017	FLNA	Flna	1	1			1	1		['smooth muscle cell']	['pericyte cell']
300055	Mental Retardation, X-linked, Syndromic 13	300005	MECP2	Mecp2	1	1	PS309510	Mental retardation, X-linked syndromic	1	1
300067	Lissencephaly, X-linked, 1	300121	DCX	Dcx	1	1	PS607432	Lissencephaly	0	0			['stromal cell', 'myelinating Schwann cell']
300100	Adrenoleukodystrophy	300371	ABCD1	Abcd1	1	1			1	0
300114	Raynaud-claes Syndrome	302910	CLCN4	Clcn4	1	1	PS309510	Mental retardation, X-linked syndromic	0	0
300148	Mehmo Syndrome	300161	EIF2S3	Eif2s3x	1	1	PS309510	Mental retardation, X-linked syndromic	1	1
300166	Microphthalmia, Syndromic 2	300485	BCOR	Bcor	1	1	PS309800	Microphthalmia, syndromic	1	1		['capillary endothelial cell']
300200	Adrenal Hypoplasia, Congenital	300473	NR0B1	Nr0b1	1	1			0	0
300209	Simpson-golabi-behmel Syndrome, Type 2	300170	OFD1	Ofd1	1	1			1	0
300215	Lissencephaly, X-linked, 2	300382	ARX	Arx	1	1	PS607432	Lissencephaly	1	0			['stromal cell', 'myelinating Schwann cell']
300232	Spondyloepimetaphyseal Dysplasia, X-linked, With Mental Deterioration	300169	AIFM1		1	1			1	0
300243	Mental Retardation, X-linked Syndromic, Christianson Type	300231	SLC9A6	Slc9a6	1	1	PS309510	Mental retardation, X-linked syndromic	1	1
300244	Terminal Osseous Dysplasia	300017	FLNA	Flna	1	1			1	1		['smooth muscle cell']
300257	Danon Disease	309060	LAMP2	Lamp2	1	1			1	1
300260	Lubs X-linked Mental Retardation Syndrome	300005	MECP2	Mecp2	1	1	PS309510	Mental retardation, X-linked syndromic	1	1
300280	Uruguay Faciocardiomusculoskeletal Syndrome	300163	FHL1	Fhl1	1	1			1	1
300321	Fg Syndrome 2	300017	FLNA	Flna	1	1	PS305400	FG syndrome	1	1
300322	Lesch-nyhan Syndrome	308000	HPRT1	Hprt	1	1			1	1
300352	Creatine Deficiency Syndrome, X-linked	300036	SLC6A8	Slc6a8	1	1	PS300352	Cerebral creatine deficiency syndrome	1	1			['myelinating Schwann cell']
300354	Mental Retardation, X-linked, Syndromic, Cabezas Type	300304	CUL4B	Cul4b	1	1	PS309510	Mental retardation, X-linked syndromic	1	1
300373	Osteopathia Striata With Cranial Sclerosis	300647	AMER1	Amer1	1	1			0	0
300376	Muscular Dystrophy, Becker Type	300377	DMD	Dmd	1	1			1	1	Yes
300422	Fg Syndrome 4	300172	CASK	Cask	1	1	PS305400	FG syndrome	1	1
300423	Mental Retardation, X-linked, Syndromic, Hedera Type	300556	ATP6AP2	Atp6ap2	1	1	PS309510	Mental retardation, X-linked syndromic	1	1
300438	Hsd10 Mitochondrial Disease	300256	HSD17B10	Hsd17b10	1	1			1	1
300486	Mental Retardation, X-linked, With Cerebellar Hypoplasia And Distinctivefacial Appearance	300127	OPHN1	Ophn1	1	1	PS309510	Mental retardation, X-linked syndromic	1	1
300489	Spinal Muscular Atrophy, Distal, X-linked 3	300011	ATP7A	Atp7a	1	1			1	1
300523	Allan-herndon-dudley Syndrome	300095	SLC16A2	Slc16a2	1	1			1	1
300534	Mental Retardation, X-linked, Syndromic, Claes-jensen Type	314690	KDM5C	Kdm5c	1	1	PS309510	Mental retardation, X-linked syndromic	1	1
300559	Muscle Glycogenosis, X-linked	311870	PHKA1	Phka1	1	1			1	1		['fast muscle cell']
300607	Epileptic Encephalopathy, Early Infantile, 8	300429	ARHGEF9	Arhgef9	1	1	PS308350	Developmental and epileptic encephalopathy	1	1
300653	Phosphoglycerate Kinase 1 Deficiency	311800	PGK1	Pgk1	1	1			1	1
300659	Mental Retardation, X-linked 93	300553	BRWD3	Brwd3	1	1	PS309530	Mental retardation, nonsyndromic, X-linked	1	0			['smooth muscle cell']
300661	Phosphoribosylpyrophosphate Synthetase Superactivity	311850	PRPS1	Prps1	1	1			1	1		['cd4-positive, alpha-beta t cell']
300672	Epileptic Encephalopathy, Early Infantile, 2	300203	CDKL5	Cdkl5	1	1	PS308350	Developmental and epileptic encephalopathy	1	0
300673	Encephalopathy, Neonatal Severe, Due To Mecp2 Mutations	300005	MECP2	Mecp2	1	1			1	1
300676	Mental Retardation, X-linked, Syndromic 14	300298	UPF3B	Upf3b	1	1	PS309510	Mental retardation, X-linked syndromic	1	1
300695	Scapuloperoneal Myopathy, X-linked Dominant	300163	FHL1	Fhl1	1	1			1	1
300696	Myopathy, X-linked, With Postural Muscle Atrophy	300163	FHL1	Fhl1	1	1	PS310300	Emery-Dreifuss muscular dystrophy	1	1	Yes
300699	Mental Retardation, X-linked 94	305915	GRIA3	Gria3	1	1	PS309510	Mental retardation, X-linked syndromic	0	0
300699	Mental Retardation, X-linked 94	305915	GRIA3	Gria3	1	1	PS309530	Mental retardation, nonsyndromic, X-linked	0	0			['smooth muscle cell']
300717	Myopathy, Reducing Body, X-linked, Early-onset, Severe	300163	FHL1	Fhl1	1	1			1	1
300718	Myopathy, Reducing Body, X-linked, Childhood-onset	300163	FHL1	Fhl1	1	1			1	1
300749	Mental Retardation And Microcephaly With Pontine And Cerebellar Hypoplasia	300172	CASK	Cask	1	1	PS309510	Mental retardation, X-linked syndromic	1	1
300799	Mental Retardation, X-linked Syndromic, Raymond Type	300646	ZDHHC9	Zdhhc9	1	1	PS309510	Mental retardation, X-linked syndromic	1	1
300816	Combined Oxidative Phosphorylation Deficiency 6	300169	AIFM1		1	1	PS609060	Combined oxidative phosphorylation deficiency	1	0		['fast muscle cell', 'slow muscle cell']	['striated muscle cell', 'myelinating Schwann cell']
300830	Autism, Susceptibility To, X-linked 4	300828	PTCHD1	Ptchd1	1	1	PS209850	Autism, susceptiblity to	1	0		['skeletal muscle satellite stem cell']
300831	Ck Syndrome	300275	NSDHL	Nsdhl	1	1			0	1
300842	Mcleod Syndrome	314850	XK	Xk	1	1			0	0
300844	Mental Retardation, X-linked 19	300075	RPS6KA3	Rps6ka3	1	1	PS309530	Mental retardation, nonsyndromic, X-linked	1	0			['smooth muscle cell']
300849	Mental Retardation, X-linked 41	300104	GDI1	Gdi1	1	1	PS309530	Mental retardation, nonsyndromic, X-linked	1	1			['smooth muscle cell']
300850	Mental Retardation, X-linked 90	300189	DLG3	Dlg3	1	1	PS309530	Mental retardation, nonsyndromic, X-linked	1	0			['smooth muscle cell']
300855	Ogden Syndrome	300013	NAA10	Naa10	1	1			1	1
300867	Kabuki Syndrome 2	300128	KDM6A	Kdm6a	1	1	PS147920	Kabuki syndrome	1	1
300868	Multiple Congenital Anomalies-hypotonia-seizures Syndrome 2	311770	PIGA	Piga	1	1	PS308350	Developmental and epileptic encephalopathy	1	0	Yes
300868	Multiple Congenital Anomalies-hypotonia-seizures Syndrome 2	311770	PIGA	Piga	1	1	PS614080	Multiple congenital anomalies-hypotonia-seizures syndrome	1	0	Yes
300882	Cornelia De Lange Syndrome 5	300269	HDAC8	Hdac8	1	1	PS122470	Cornelia de Lange syndrome	1	0
300884	Epileptic Encephalopathy, Early Infantile, 36	300776	ALG13		1	1	PS212065	Congenital disorders of glycosylation, type I	1	0
300884	Epileptic Encephalopathy, Early Infantile, 36	300776	ALG13		1	1	PS308350	Developmental and epileptic encephalopathy	1	0
300886	Mental Retardation, X-linked, Syndromic 32	300138	CLIC2		1	1	PS309510	Mental retardation, X-linked syndromic	1	0
300894	Neurodegeneration With Brain Iron Accumulation 5	300526	WDR45	Wdr45	1	1	PS234200	Neurodegeneration with brain iron accumulation	1	1
300896	Congenital Disorder Of Glycosylation, Type Iim	314375	SLC35A2		1	1	PS212066	Congenital disorders of glycosylation, type II	1	0
300896	Congenital Disorder Of Glycosylation, Type Iim	314375	SLC35A2		1	1	PS308350	Developmental and epileptic encephalopathy	1	0
300905	Charcot-marie-tooth Disease, X-linked Dominant, 6	300906	PDK3	Pdk3	1	1	PS118220	Charcot-Marie-Tooth disease	1	1
300911	Parkinsonism With Spasticity, X-linked	300556	ATP6AP2	Atp6ap2	1	1			1	1
300912	Mental Retardation, X-linked 98	300524	NEXMIF	Nexmif	1	1	PS309530	Mental retardation, nonsyndromic, X-linked	0	0			['smooth muscle cell']
300919	Mental Retardation, X-linked 99	300072	USP9X	Usp9x	1	1	PS309530	Mental retardation, nonsyndromic, X-linked	1	1			['smooth muscle cell']
300934	Congenital Disorder Of Glycosylation, Type Iy	300090	SSR4	Ssr4	1	1	PS212065	Congenital disorders of glycosylation, type I	1	1
300952	Linear Skin Defects With Multiple Congenital Anomalies 3	300403	NDUFB11	Ndufb11	1	1	PS309801	Linear skin defects with multiple congenital anomalies	1	1		['fast muscle cell']
300957	Mental Retardation, X-linked 12/35	300395	THOC2	Thoc2	1	1	PS309530	Mental retardation, nonsyndromic, X-linked	1	1			['smooth muscle cell']
300958	Intellectual Developmental Disorder, X-linked, Syndrome, Snijders Blok Type	300160	DDX3X	Ddx3x	1	1	PS309510	Mental retardation, X-linked syndromic	1	1
300960	Mend Syndrome	300205	EBP	Ebp	1	1			1	1		['mature nk t cell']
300963	Ritscher-schinzel Syndrome 2	300859	CCDC22	Ccdc22	1	1	PS220210	Ritscher-Schinzel syndrome	0	1
300966	Mental Retardation, X-linked, Syndromic 33	313650	TAF1	Taf1	1	1	PS309510	Mental retardation, X-linked syndromic	1	1
300967	Mental Retardation, X-linked, Syndromic 34	300084	NONO	Nono	1	1	PS309510	Mental retardation, X-linked syndromic	1	1
300968	Mental Retardation, X-linked 99, Syndromic, Female-restricted	300072	USP9X	Usp9x	1	1	PS309530	Mental retardation, nonsyndromic, X-linked	1	1			['smooth muscle cell']
300978	Tonne-kalscheuer Syndrome	300379	RLIM	Rlim	1	1	PS309510	Mental retardation, X-linked syndromic	1	1
300978	Tonne-kalscheuer Syndrome	300379	RLIM	Rlim	1	1	PS309530	Mental retardation, nonsyndromic, X-linked	1	1			['smooth muscle cell']
300983	Mental Retardation, X-linked 104	300838	FRMPD4	Frmpd4	1	1	PS309530	Mental retardation, nonsyndromic, X-linked	0	0			['smooth muscle cell']
300986	Mental Retardation, X-linked, Syndromic, Bain Type	300610	HNRNPH2	Hnrnph2	1	1	PS309510	Mental retardation, X-linked syndromic	1	1
300989	Meester-loeys Syndrome	301870	BGN	Bgn	1	1			1	1
300990	Midface Hypoplasia, Hearing Impairment, Elliptocytosis, And Nephrocalcinosis	300195	AMMECR1	Ammecr1	1	1			1	0
300998	Mental Retardation, X-linked, Syndromic, 35	312173	RPL10	Rpl10	1	1	PS309510	Mental retardation, X-linked syndromic	1	1
301006	Galloway-mowat Syndrome 2, X-linked	300060	LAGE3		1	1	PS251300	Galloway-Mowat syndrome	1	0
301020	Mitochondrial Complex I Deficiency, Nuclear Type 12	300078	NDUFA1	Ndufa1	1	1	PS252010	Mitochondrial complex I deficiency, nuclear type	1	1		['fast muscle cell', 'slow muscle cell']	['striated muscle cell']
301022	Neurodevelopmental Disorder, X-linked, With Craniofacial Abnormalities	300826	STAG2	Stag2	1	1			1	1
301024	Intellectual Developmental Disorder, X-linked 108	300368	SLC9A7	Slc9a7	1	1	PS309530	Mental retardation, nonsyndromic, X-linked	0	0			['smooth muscle cell']
301029	Shukla-vernon Syndrome	300688	BCORL1	Bcorl1	1	1			1	0
301030	Van Esch-o'driscoll Syndrome	312040	POLA1	Pola1	1	1	PS309510	Mental retardation, X-linked syndromic	0	0
301032	Basilicata-akhtar Syndrome	300609	MSL3	Msl3	1	1	PS309510	Mental retardation, X-linked syndromic	1	1
301039	Intellectual Developmental Disorder, X-linked, Syndromic, Hackman-di Donato Type	300766	NKAP	Nkap	1	1	PS309510	Mental retardation, X-linked syndromic	1	1
301040	Alpha-thalassemia/mental Retardation Syndrome, Nondeletion Type, X-linked	300032	ATRX	Atrx	1	1			1	1
301041	Wieacker-wolff Syndrome, Female-restricted	300897	ZC4H2		1	1	PS314580	Wieacker-Wolff syndrome	0	0
301044	Developmental And Epileptic Encephalopathy 85, With Or Without Midline Brain Defects	300040	SMC1A	Smc1a	1	1	PS308350	Developmental and epileptic encephalopathy	1	1
301500	Fabry Disease	300644	GLA	Gla	1	1			1	1
301830	Spinal Muscular Atrophy, X-linked 2	314370	UBA1	Uba1	1	1			1	1
301835	Arts Syndrome	311850	PRPS1	Prps1	1	1	PS309510	Mental retardation, X-linked syndromic	1	1
301900	Borjeson-forssman-lehmann Syndrome	300414	PHF6	Phf6	1	1	PS309510	Mental retardation, X-linked syndromic	1	1
302060	Barth Syndrome	300394	TAFAZZIN	Taz	1	1	PS250950	3-Methylglutaconic aciduria	0	1
302500	Spinocerebellar Ataxia, X-linked 1	300014	ATP2B3	Atp2b3	1	1			0	0
302800	Charcot-marie-tooth Disease, X-linked, 1	304040	GJB1	Gjb1	1	1	PS118220	Charcot-Marie-Tooth disease	0	0
303350	Masa Syndrome	308840	L1CAM	L1cam	1	1	PS303350	Spastic paraplegia	1	1
303600	Coffin-lowry Syndrome	300075	RPS6KA3	Rps6ka3	1	1			1	0
304100	Corpus Callosum, Partial Agenesis Of, X-linked	308840	L1CAM	L1cam	1	1			1	1
304110	Craniofrontonasal Syndrome	300035	EFNB1	Efnb1	1	1			1	1		['capillary endothelial cell']
304340	Mental Retardation, X-linked, Syndromic 5	300629	AP1S2	Ap1s2	1	1	PS309510	Mental retardation, X-linked syndromic	1	1
304700	Mohr-tranebjaerg Syndrome	300356	TIMM8A	Timm8a1	1	1			1	1			['skeletal muscle satellite cell']
305450	Opitz-kaveggia Syndrome	300188	MED12	Med12	1	1			0	1
305600	Focal Dermal Hypoplasia	300651	PORCN	Porcn	1	1			0	0
305620	Frontometaphyseal Dysplasia	300017	FLNA	Flna	1	1	PS305620	Frontometaphyseal dysplasia	1	1
307000	Hydrocephalus Due To Congenital Stenosis Of Aqueduct Of Sylvius	308840	L1CAM	L1cam	1	1	PS236600	Hydrocephalus, congenital	1	1
307030	Glycerol Kinase Deficiency	300474	GK	Gykl1	1	1			1	0		['macrophage']
308050	Congenital Hemidysplasia With Ichthyosiform Erythroderma And Limb Defects	300275	NSDHL	Nsdhl	1	1			0	1
308300	Incontinentia Pigmenti	300248	IKBKG	Ikbkg	1	1			1	0
308350	Epileptic Encephalopathy, Early Infantile, 1	300382	ARX	Arx	1	1	PS308350	Developmental and epileptic encephalopathy	1	0
309000	Lowe Oculocerebrorenal Syndrome	300535	OCRL	Ocrl	1	1			1	1
309400	Menkes Disease	300011	ATP7A	Atp7a	1	1			1	1
309500	Renpenning Syndrome	300463	PQBP1	Pqbp1	1	1	PS309510	Mental retardation, X-linked syndromic	1	1
309510	Partington Syndrome	300382	ARX	Arx	1	1	PS309510	Mental retardation, X-linked syndromic	1	0
309520	Lujan-fryns Syndrome	300188	MED12	Med12	1	1	PS309510	Mental retardation, X-linked syndromic	0	1
309530	Mental Retardation, X-linked 1	300522	IQSEC2	Iqsec2	1	1	PS309530	Mental retardation, nonsyndromic, X-linked	1	1			['smooth muscle cell']
309541	Mental Retardation, X-linked 3	300019	HCFC1	Hcfc1	1	1	PS309530	Mental retardation, nonsyndromic, X-linked	1	1			['smooth muscle cell']
309580	Mental Retardation-hypotonic Facies Syndrome, X-linked, 1	300032	ATRX	Atrx	1	1			1	1
309583	Mental Retardation, X-linked, Snyder-robinson Type	300105	SMS	Sms-ps	1	1	PS309510	Mental retardation, X-linked syndromic	1	0
309583	Mental Retardation, X-linked, Snyder-robinson Type	300105	SMS	Sms	1	1	PS309510	Mental retardation, X-linked syndromic	1	1
309585	Wilson-turner Syndrome	300964	LAS1L	Las1l	1	1	PS309510	Mental retardation, X-linked syndromic	1	1
309590	Mental Retardation, X-linked, Syndromic, Turner Type	300697	HUWE1	Huwe1	1	1	PS309510	Mental retardation, X-linked syndromic	1	1
309800	Microphthalmia, Syndromic 1	300013	NAA10	Naa10	1	1	PS309800	Microphthalmia, syndromic	1	1		['capillary endothelial cell']
309801	Microphthalmia, Syndromic 7	300056	HCCS	Hccs	1	1	PS309800	Microphthalmia, syndromic	1	1		['capillary endothelial cell']
309801	Microphthalmia, Syndromic 7	300056	HCCS	Hccs	1	1	PS309801	Linear skin defects with multiple congenital anomalies	1	1		['fast muscle cell']
309900	Mucopolysaccharidosis Type Ii	300823	IDS	Ids	1	1	PS607014	Mucopolysaccharidoses	1	1			['macrophage']
310200	Muscular Dystrophy, Duchenne Type	300377	DMD	Dmd	1	1			1	1	Yes
310300	Emery-dreifuss Muscular Dystrophy, X-linked	300384	EMD	Emd	1	1	PS310300	Emery-Dreifuss muscular dystrophy	1	1	Yes
310400	Myotubular Myopathy 1	300415	MTM1	Mtm1	1	1	PS160150	Myopathy, centronuclear	1	0	Yes	['fast muscle cell', 'slow muscle cell']
310440	Myopathy, X-linked, With Excessive Autophagy	300913	VMA21		1	1			1	0
310490	Cowchock Syndrome	300169	AIFM1		1	1	PS118220	Charcot-Marie-Tooth disease	1	0
311070	Charcot-marie-tooth Disease, X-linked Recessive, 5	311850	PRPS1	Prps1	1	1	PS118220	Charcot-Marie-Tooth disease	1	1
311900	Tarp Syndrome	300080	RBM10	Rbm10	1	1			1	1
312080	Pelizaeus-merzbacher Disease	300401	PLP1	Plp1	1	1	PS312080	Leukodystrophy, hypomyelinating	0	1
312170	Pyruvate Decarboxylase Deficiency	300502	PDHA1	Pdha1	1	1	PS312170	Pyruvate dehydrogenase complex deficiency	1	1		['fast muscle cell', 'slow muscle cell']	['striated muscle cell']
312750	Rett Syndrome	300005	MECP2	Mecp2	1	1			1	1
312870	Simpson-golabi-behmel Syndrome, Type 1	300037	GPC3	Gpc3	1	1			1	1			['stromal cell']
312920	Spastic Paraplegia 2, X-linked	300401	PLP1	Plp1	1	1	PS303350	Spastic paraplegia	0	1
313200	Spinal And Bulbar Muscular Atrophy, X-linked 1	313700	AR	Ar	1	1			1	1			['skeletal muscle fibroblast; fibroblast', 'skeletal muscle fibroblast; fibroblast.1']
313900	Thrombocytopenia 1	300392	WAS	Was	1	1	PS313900	Thrombocytopenia	1	1
314580	Wieacker-wolff Syndrome	300897	ZC4H2		1	1	PS309510	Mental retardation, X-linked syndromic	0	0
314580	Wieacker-wolff Syndrome	300897	ZC4H2		1	1	PS314580	Wieacker-Wolff syndrome	0	0
600001	Pancreatic Agenesis And Congenital Heart Defects	601656	GATA6	Gata6	1	1			1	1			['vein endothelial cell; endothelial stalk cell']
600081	25-@hydroxyvitamin D3 Deficiency, Selective	608713	CYP2R1	Cyp2r1	1	1			0	0
600118	Warburg Micro Syndrome 1	602536	RAB3GAP1	Rab3gap1	1	1	PS600118	Warburg micro syndrome	1	1
600142	Cerebral Autosomal Recessive Arteriopathy With Subcortical Infarcts	602194	HTRA1	Htra1	1	1	PS125310	Cerebral arteriopathy with subcortical infarcts and leukoencephalopathy	1	1
600175	Spinal Muscular Atrophy, Distal, Congenital Nonprogressive	605427	TRPV4	Trpv4	1	1			0	1			['endothelial cell of artery']
600224	Spinocerebellar Ataxia 5	604985	SPTBN2	Sptbn2	1	1	PS164400	Spinocerebellar ataxia	0	0			['smooth muscle cell']
600334	Tibial Muscular Dystrophy, Tardive	188840	TTN	Ttn	1	1			1	1		['fast muscle cell']
600348	Band Heterotopia	602033	EML1	Eml1	1	1			1	1
600363	Spastic Paraplegia 6, Autosomal Dominant	608145	NIPA1	Nipa1	1	1	PS303350	Spastic paraplegia	0	1
600373	Codas Syndrome	605490	LONP1	Lonp1	1	1			1	1
600462	Mitochondrial Myopathy And Sideroblastic Anemia	608109	PUS1	Pus1	1	1	PS600462	Myopathy, lactic acidosis, and sideroblastic anemia	1	1	Yes
600627	Hypertryptophanemia	191070	TDO2	Tdo2	1	1			0	0
600638	Fibrosis Of Extraocular Muscles, Congenital, Type 3	602661	TUBB3	Tubb3	1	1	PS135700	Fibrosis of extraocular muscles, congenital	0	0
600721	D-2-@hydroxyglutaric Aciduria	609186	D2HGDH	D2hgdh	1	1	PS600721	D-2-hydroxyglutaric aciduria	1	0
600740	Hypocalciuric Hypercalcemia, Familial, Type Iii	602242	AP2S1	Ap2s1	1	1	PS145980	Hypocalciuric hypercalcemia	1	1
600794	Neuronopathy, Distal Hereditary Motor, Type V	600287	GARS1	Gars	1	1			0	1
600882	Charcot-marie-tooth Disease, Axonal, Type 2b	602298	RAB7A	Rab7	1	1	PS118220	Charcot-Marie-Tooth disease	1	0
600920	Van Den Ende-gupta Syndrome	613619	SCARF2	Scarf2	1	1			1	1		['tendon cell']
600969	Epiphyseal Dysplasia, Multiple, 3	120270	COL9A3	Col9a3	1	1	PS132400	Epiphyseal dysplasia, multiple	0	1			['myelinating Schwann cell']
601003	Brody Myopathy	108730	ATP2A1	Atp2a1	1	1			1	1		['fast muscle cell']	['striated muscle cell']
601005	Timothy Syndrome	114205	CACNA1C	Cacna1c	1	1			1	0
601042	Choreoathetosis/spasticity, Episodic	138140	SLC2A1	Slc2a1	1	1	PS128100	Dystonia	1	1
601088	Ayme-gripp Syndrome	177075	MAF	Maf	1	1			1	1
601098	Charcot-marie-tooth Disease, Demyelinating, Type 1c	603795	LITAF	Litaf	1	1	PS118220	Charcot-Marie-Tooth disease	1	1
601104	Supranuclear Palsy, Progressive, 1	157140	MAPT	Mapt	1	1			1	1		['slow muscle cell']
601110	Congenital Disorder Of Glycosylation, Type Id	608750	ALG3	Alg3	1	1	PS212065	Congenital disorders of glycosylation, type I	1	1
601152	Hereditary Motor And Sensory Neuropathy Vi	608507	MFN2	Mfn2	1	1	PS118220	Charcot-Marie-Tooth disease	1	1
601162	Spastic Paraplegia 9, Autosomal Dominant	138250	ALDH18A1	Aldh18a1	1	1	PS303350	Spastic paraplegia	1	1
601186	Microphthalmia, Syndromic 9	610745	STRA6	Stra6	1	1	PS300345	Microphthalmia, isolated, with coloboma	0	1
601186	Microphthalmia, Syndromic 9	610745	STRA6	Stra6	1	1	PS309800	Microphthalmia, syndromic	0	1		['capillary endothelial cell']
601198	Hypocalcemia, Autosomal Dominant 1	601199	CASR	Casr	1	1	PS601198	Hypocalcemia	0	0
601200	Pleuropulmonary Blastoma	606241	DICER1	Dicer1	1	1			1	0
601238	Cerebellar Ataxia, Cayman Type	608179	ATCAY	Atcay	1	1			0	0
601287	Muscular Dystrophy, Limb-girdle, Type 2f	601411	SGCD	Sgcd	1	1	PS253600	Muscular dystrophy, limb-girdle, autosomal recessive	1	0	Yes
601321	Neurofibromatosis-noonan Syndrome	613113	NF1	Nf1	1	1			1	1
601338	Cerebellar Ataxia, Areflexia, Pes Cavus, Optic Atrophy, And Sensorineural Hearing Loss	182350	ATP1A3	Atp1a3	1	1			0	1			['monocyte-derived dendritic cell']
601382	Charcot-marie-tooth Disease, Type 4b1	603557	MTMR2	Mtmr2	1	1	PS118220	Charcot-Marie-Tooth disease	1	1
601390	Van Maldergem Syndrome 1	603057	DCHS1	Dchs1	1	1	PS601390	Van Maldergem syndrome	1	1			['capillary endothelial cell', 'tendon cell']
601419	Myopathy, Myofibrillar, 1	125660	DES	Des	1	1	PS601419	Myopathy, myofibrillar	1	1	Yes	['fast muscle cell', 'slow muscle cell']	['striated muscle cell']
601455	Charcot-marie-tooth Disease, Type 4d	605262	NDRG1	Ndrg1	1	1	PS118220	Charcot-Marie-Tooth disease	1	1
601462	Myasthenic Syndrome, Congenital, 1a, Slow-channel	100690	CHRNA1	Chrna1	1	1	PS601462	Myasthenic syndrome, congenital	1	1	Yes
601472	Charcot-marie-tooth Disease, Axonal, Type 2d	600287	GARS1	Gars	1	1	PS118220	Charcot-Marie-Tooth disease	0	1
601539	Peroxisome Biogenesis Disorder 1b	602136	PEX1	Pex1	1	1	PS214100	Peroxisome biogenesis disorder	1	0			['smooth muscle cell']
601559	Stuve-wiedemann Syndrome	151443	LIFR	Lifr	1	1			1	1		['endothelial cell of vascular tree']	['vein endothelial cell; endothelial stalk cell']
601596	Charcot-marie-tooth Disease, Type 4c	608206	SH3TC2	Sh3tc2	1	1	PS118220	Charcot-Marie-Tooth disease	0	0
601675	Trichothiodystrophy 1, Photosensitive	126340	ERCC2	Ercc2	1	1	PS601675	Trichothiodystrophy	0	0
601678	Bartter Syndrome, Antenatal, Type 1	600839	SLC12A1	Slc12a1	1	1	PS601678	Bartter syndrome	0	0
601680	Arthrogryposis, Distal, Type 2b	191043	TNNI2	Tnni2	1	1	PS108120	Arthrogryposis, distal	1	1	Yes	['fast muscle cell']	['striated muscle cell']
601776	Ehlers-danlos Syndrome, Musculocontractural Type	608429	CHST14	Chst14	1	1	PS130000	Ehlers-Danlos syndrome	1	1		['mesenchymal stem cell', 'tendon cell']	['tendon cell', 'stromal cell']
601815	Phosphoglycerate Dehydrogenase Deficiency	606879	PHGDH	Phgdh	1	1			1	1
601954	Muscular Dystrophy, Limb-girdle, Type 2g	604488	TCAP	Tcap	1	1	PS253600	Muscular dystrophy, limb-girdle, autosomal recessive	1	1	Yes
602014	Hypomagnesemia With Secondary Hypocalcemia	607009	TRPM6	Trpm6	1	1	PS602014	Hypomagnesemia	0	1
602078	Fibrosis Of Extraocular Muscles, Congenital, 2	602753	PHOX2A	Phox2a	1	1	PS135700	Fibrosis of extraocular muscles, congenital	0	0
602099	Amyotrophic Lateral Sclerosis 5, Juvenile	610844	SPG11	Spg11	1	1	PS105400	Amyotrophic lateral sclerosis	1	0
602342	Pierpont Syndrome	608628	TBL1XR1	Tbl1xr1	1	1			1	1
602398	Desmosterolosis	606418	DHCR24	Dhcr24	1	1			1	1			['skeletal muscle satellite cell']
602433	Amyotrophic Lateral Sclerosis 4, Juvenile	608465	SETX	Setx	1	1	PS105400	Amyotrophic lateral sclerosis	1	1
602471	Short Stature, Auditory Canal Atresia, Mandibular Hypoplasia, Andskeletal Abnormalities	138890	GSC	Gsc	1	1			1	0		['tendon cell']
602473	Encephalopathy, Ethylmalonic	608451	ETHE1	Ethe1	1	1			1	1
602522	Bartter Syndrome, Infantile, With Sensorineural Deafness	606412	BSND	Bsnd	1	1	PS601678	Bartter syndrome	0	0
602535	Marshall-smith Syndrome	164005	NFIX	Nfix	1	1			1	1
602541	Muscular Dystrophy, Congenital, Megaconial Type	612395	CHKB	Chkb	1	1			0	1
602579	Congenital Disorder Of Glycosylation, Type Ib	154550	MPI	Mpi	1	1	PS212065	Congenital disorders of glycosylation, type I	0	0
602629	Dystonia 6, Torsion	609520	THAP1	Thap1	1	1	PS128100	Dystonia	1	0
602668	Dystrophia Myotonica 2	116955	CNBP	Cnbp	1	1	PS160900	Myotonic dystrophy	1	1	Yes	['fast muscle cell', 'slow muscle cell']
602771	Rigid Spine Muscular Dystrophy 1	606210	SELENON	Selenon	1	1			1	0
602782	Histiocytosis-lymphadenopathy Plus Syndrome	612373	SLC29A3	Slc29a3	1	1			0	1
603034	Endplate Acetylcholinesterase Deficiency	603033	COLQ		1	1	PS601462	Myasthenic syndrome, congenital	0	0	Yes
603041	Mitochondrial Dna Depletion Syndrome 1 (mngie Type)	131222	TYMP	Tymp	1	1	PS603041	Mitochondrial DNA depletion syndrome	1	0	Yes
603147	Congenital Disorder Of Glycosylation, Type Ic	604566	ALG6	Alg6	1	1	PS212065	Congenital disorders of glycosylation, type I	0	1
603358	Gracile Syndrome	603647	BCS1L	Bcs1l	1	1			1	0	Yes
603387	Megalencephaly-polymicrogyria-polydactyly-hydrocephalus Syndrome	603157	PIK3R2	Pik3r2	1	1	PS603387	Megalencephaly-polymicrogyria-polydactyly-hydrocephalus syndrome	0	1
603472	Neuronal Intranuclear Inclusion Disease	618025	NOTCH2NLC		1	1			0	0
603511	Muscular Dystrophy, Limb-girdle, Type 1d	611332	DNAJB6	Dnajb6	1	1	PS603511	Muscular dystrophy, limb-girdle, autosomal dominant	1	1	Yes	['mesenchymal stem cell', 'tendon cell']	['stromal cell']
603513	Cerebral Palsy, Spastic, Symmetric, Autosomal Recessive	605363	GAD1	Gad1	1	1	PS603513	Spastic quadriplegic cerebral palsy	0	0
603543	Limb-mammary Syndrome	603273	TP63	Trp63	1	1			1	0		['fast muscle cell']
603546	Spondyloepimetaphyseal Dysplasia With Multiple Dislocations	603213	KIF22	Kif22	1	1	PS271640	Spondyloepimetaphyseal dysplasia with joint laxity	1	0
603553	Hemophagocytic Lymphohistiocytosis, Familial, 2	170280	PRF1	Prf1	1	1	PS267700	Hemophagocytic lymphohistiocytosis, familial	1	0		['mature nk t cell']
603563	Spastic Paraplegia 8, Autosomal Dominant	610657	WASHC5	Washc5	1	1	PS303350	Spastic paraplegia	1	0
603585	Congenital Disorder Of Glycosylation, Type Iif	605634	SLC35A1	Slc35a1	1	1	PS212066	Congenital disorders of glycosylation, type II	1	1
603689	Myopathy, Myofibrillar, 9, With Early Respiratory Failure	188840	TTN	Ttn	1	1	PS601419	Myopathy, myofibrillar	1	1		['fast muscle cell', 'slow muscle cell']	['striated muscle cell']
603736	Ohdo Syndrome, Sbbys Variant	605880	KAT6B		1	1			1	0		['t cell']
603896	Leukoencephalopathy With Vanishing White Matter	606273	EIF2B3	Eif2b3	1	1			1	1		['slow muscle cell']	['B cell']
603896	Leukoencephalopathy With Vanishing White Matter	606687	EIF2B4	Eif2b4	1	1			1	1		['slow muscle cell']	['B cell']
603896	Leukoencephalopathy With Vanishing White Matter	603945	EIF2B5	Eif2b5	1	1			1	1		['slow muscle cell']	['B cell']
603896	Leukoencephalopathy With Vanishing White Matter	606686	EIF2B1	Eif2b1	1	1			1	1		['slow muscle cell']	['B cell']
603896	Leukoencephalopathy With Vanishing White Matter	606454	EIF2B2	Eif2b2	1	1			1	1		['slow muscle cell']	['B cell']
604004	Megalencephalic Leukoencephalopathy With Subcortical Cysts	605908	MLC1	Mlc1	1	1	PS604004	Leukoencephalopathy, megalencephalic	0	0
604121	Cerebellar Ataxia, Deafness, And Narcolepsy, Autosomal Dominant	126375	DNMT1	Dnmt1	1	1			1	1
604168	Congenital Cataracts, Facial Dysmorphism, And Neuropathy	604927	CTDP1	Ctdp1	1	1			1	1
604187	Spastic Paraplegia 10, Autosomal Dominant	602821	KIF5A	Kif5a	1	1	PS303350	Spastic paraplegia	0	0
604273	Atpase Deficiency, Nuclear-encoded	608918	ATPAF2	Atpaf2	1	1	PS604273	Mitochondrial complex V (ATP synthase) deficiency, nuclear type	0	1		['fast muscle cell', 'slow muscle cell']	['striated muscle cell']
604286	Muscular Dystrophy, Limb-girdle, Type 2e	600900	SGCB	Sgcb	1	1	PS253600	Muscular dystrophy, limb-girdle, autosomal recessive	1	1	Yes
604290	Aceruloplasminemiahypoceruloplasminemia, Included	117700	CP	Cp	1	1			1	1		['endothelial cell of artery']
604317	Microcephaly 2, Primary, Autosomal Recessive, With Or Without Corticalmalformations	613583	WDR62	Wdr62	1	1	PS251200	Microcephaly, primary autosomal recessive	0	0		['t cell']
604320	Spinal Muscular Atrophy, Distal, Autosomal Recessive, 1	600502	IGHMBP2	Ighmbp2	1	1			1	0
604326	Spinocerebellar Ataxia 12	604325	PPP2R2B	Ppp2r2b	1	1	PS164400	Spinocerebellar ataxia	1	1			['smooth muscle cell']
604360	Spastic Paraplegia 11, Autosomal Recessive	610844	SPG11	Spg11	1	1	PS303350	Spastic paraplegia	1	0
604367	Lipodystrophy, Familial Partial, Type 3	601487	PPARG	Pparg	1	1	PS151660	Lipodystrophy, familial partial	1	1		['capillary endothelial cell']	['capillary endothelial cell', 'blood vessel endothelial cell']
604369	Sialuria, Finnish Type	604322	SLC17A5	Slc17a5	1	1			1	0
604377	Cardioencephalomyopathy, Fatal Infantile, Due To Cytochrome C Oxidasedeficiency	604272	SCO2	Sco2	1	1	PS220110	Mitochondrial complex IV deficiency, nuclear-type	0	1		['fast muscle cell', 'slow muscle cell']	['striated muscle cell']
604391	Ataxia-telangiectasia-like Disorder	600814	MRE11	Mre11a	1	1	PS604391	Ataxia-telangiectasia-like disorder	1	0			['blood vessel endothelial cell']
604416	Pyogenic Sterile Arthritis, Pyoderma Gangrenosum, And Acne	606347	PSTPIP1	Pstpip1	1	1			1	1
604454	Welander Distal Myopathy	603518	TIA1	Tia1	1	1			1	1
604484	Neuropathy, Hereditary Motor And Sensory, Okinawa Type	602498	TFG	Tfg	1	1			1	1
604563	Charcot-marie-tooth Disease, Type 4b2	607697	SBF2	Sbf2	1	1	PS118220	Charcot-Marie-Tooth disease	1	1
604805	Spastic Paraplegia 12, Autosomal Dominant	603183	RTN2	Rtn2	1	1	PS303350	Spastic paraplegia	1	1
605013	Microhydranencephaly	609449	NDE1	Nde1	1	1			1	1
605039	Bohring-opitz Syndrome	612990	ASXL1	Asxl1	1	1			1	1
605130	Hairy Elbows, Short Stature, Facial Dysmorphism, And Developmentaldelay	159555	KMT2A	Kmt2a	1	1			1	0
605253	Neuropathy, Congenital Hypomyelinating	129010	EGR2	Egr2	1	1	PS118220	Charcot-Marie-Tooth disease	1	1
605253	Neuropathy, Congenital Hypomyelinating	129010	EGR2	Egr2	1	1	PS605253	Neuropathy, congenital hypomelinating	1	1		['endothelial cell of artery', 'pericyte cell']	['myelinating Schwann cell']
605259	Spinocerebellar Ataxia 13	176264	KCNC3	Kcnc3	1	1	PS164400	Spinocerebellar ataxia	0	0			['smooth muscle cell']
605275	Noonan Syndrome 2	600574	LZTR1	Lztr1	1	1	PS163950	Noonan syndrome	0	1		['mast cell']
605280	Spastic Paraplegia 13, Autosomal Dominant	118190	HSPD1	Hspd1	1	1	PS303350	Spastic paraplegia	1	1
605285	Neuropathy, Hereditary Motor And Sensory, Russe Type	142600	HK1	Hk1	1	1	PS118220	Charcot-Marie-Tooth disease	1	1
605355	Nemaline Myopathy 5, Amish Type	191041	TNNT1	Tnnt1	1	1	PS161800	Nemaline myopathy	1	1	Yes	['fast muscle cell', 'slow muscle cell']	['striated muscle cell']
605361	Spinocerebellar Ataxia 14	176980	PRKCG	Prkcg	1	1	PS164400	Spinocerebellar ataxia	0	0			['smooth muscle cell']
605407	Segawa Syndrome, Autosomal Recessive	191290	TH	Th	1	1			0	0
605588	Charcot-marie-tooth Disease, Axonal, Type 2b1	150330	LMNA	Lmna	1	1	PS118220	Charcot-Marie-Tooth disease	1	1	Yes
605589	Charcot-marie-tooth Disease, Axonal, Type 2b2	605610	PNKP	Pnkp	1	1	PS118220	Charcot-Marie-Tooth disease	1	1
605637	Myopathy, Proximal, And Ophthalmoplegia	160740	MYH2	Myh2	1	1			1	0		['fast muscle cell']
605711	Multiple Mitochondrial Dysfunctions Syndrome 1	608100	NFU1	Nfu1	1	1	PS605711	Multiple mitochondrial dysfunctions syndrome	1	1		['fast muscle cell', 'slow muscle cell']	['striated muscle cell', 'pericyte cell']
605726	Spinal Muscular Atrophy, Distal, Autosomal Recessive, 2	601978	SIGMAR1	Sigmar1	1	1			1	1
605809	Myasthenia, Familial Infantile, 1	100725	CHRNE	Chrne	1	1	PS601462	Myasthenic syndrome, congenital	0	1	Yes
605820	Nonaka Myopathy	603824	GNE	Gne	1	1			1	1
605822	Spondyloocular Syndrome	608125	XYLT2	Xylt2	1	1			0	1
605850	Dimethylglycine Dehydrogenase Deficiency	605849	DMGDH	Dmgdh	1	1			0	0
605899	Glycine Encephalopathy	238310	AMT	Amt	1	1			0	0
605899	Glycine Encephalopathy	238300	GLDC	Gldc	1	1			0	0
605899	Glycine Encephalopathy	238330	GCSH	Gcsh	1	1			1	1
606002	Spinocerebellar Ataxia, Autosomal Recessive 1	608465	SETX	Setx	1	1	PS607250	Spinocerebellar ataxia, autosomal recessive, with axonal neuropathy	1	1
606053	Intellectual Developmental Disorder With Autism And Speech Delay	604616	TBR1	Tbr1	1	1	PS209850	Autism, susceptiblity to	0	0		['skeletal muscle satellite stem cell']
606054	Propionic Acidemia	232050	PCCB	Pccb	1	1			1	1
606054	Propionic Acidemia	232000	PCCA	Pcca	1	1			1	0
606056	Congenital Disorder Of Glycosylation, Type Iib	601336	MOGS	Mogs	1	1	PS212066	Congenital disorders of glycosylation, type II	1	0
606070	Amyotrophic Lateral Sclerosis 21	164015	MATR3	Matr3	1	1	PS105400	Amyotrophic lateral sclerosis	0	1
606071	Hereditary Motor And Sensory Neuropathy, Type Iic	605427	TRPV4	Trpv4	1	1	PS118220	Charcot-Marie-Tooth disease	0	1
606072	Rippling Muscle Disease	601253	CAV3	Cav3	1	1			1	1	Yes	['fast muscle cell']	['striated muscle cell']
606159	Basal Ganglia Disease, Adult-onset	134790	FTL	Ftl1	1	1	PS234200	Neurodegeneration with brain iron accumulation	1	1
606159	Basal Ganglia Disease, Adult-onset	134790	FTL	Ftl1-ps2	1	1	PS234200	Neurodegeneration with brain iron accumulation	1	0
606164	Diamond-blackfan Anemia 15 With Mandibulofacial Dysostosis	603685	RPS28	Rps28	1	1	PS105650	Diamond-Blackfan anemia	1	1		['cd4-positive, alpha-beta t cell', 'cd8-positive, alpha-beta t cell', 'mast cell', 'mesothelial cell']	['skeletal muscle satellite cell', 'CD8-positive, alpha-beta T cell', 'B cell']
606170	Genitopatellar Syndrome	605880	KAT6B		1	1			1	0		['t cell']
606232	Phelan-mcdermid Syndrome	606230	SHANK3	Shank3	1	1			1	0		['capillary endothelial cell']
606353	Primary Lateral Sclerosis, Juvenile	606352	ALS2	Als2	1	1			1	0
606408	Ehlers-danlos-like Syndrome Due To Tenascin-x Deficiency	600985	TNXB	Tnxb	1	1	PS130000	Ehlers-Danlos syndrome	1	1		['mesenchymal stem cell', 'tendon cell']	['tendon cell', 'stromal cell']
606482	Charcot-marie-tooth Disease, Dominant Intermediate B	602378	DNM2	Dnm2	1	1	PS118220	Charcot-Marie-Tooth disease	1	1	Yes
606595	Charcot-marie-tooth Disease, Axonal, Type 2f	602195	HSPB1	Hspb1	1	1	PS118220	Charcot-Marie-Tooth disease	1	1
606612	Muscular Dystrophy-dystroglycanopathy (congenital With Or Without	606596	FKRP	Fkrp	1	1	PS613155	Muscular dystrophy-dystroglycanopathy, type B	1	1		['smooth muscle cell']
606693	Kufor-rakeb Syndrome	610513	ATP13A2	Atp13a2	1	1	PS168600	Parkinson disease	1	1
606703	Dyskinesia, Familial, With Facial Myokymia	600293	ADCY5	Adcy5	1	1			1	0
606721	Lipodystrophy With Congenital Cataracts And Neurodegeneration	601047	CAV1	Cav1	1	1	PS151660	Lipodystrophy, familial partial	1	1		['capillary endothelial cell']	['capillary endothelial cell', 'blood vessel endothelial cell']
606768	Myopathy, Distal, With Anterior Tibial Onset	603009	DYSF	Dysf	1	1			1	1	Yes
606777	Glucose Transport Defect, Blood-brain Barrier	138140	SLC2A1	Slc2a1	1	1	PS606777	Glut1 deficiency syndrome	1	1		['tendon cell']	['smooth muscle cell']
606812	Fumarase Deficiency	136850	FH	Fh1	1	1			1	1
606854	Polymicrogyria, Bilateral Frontoparietal	604110	ADGRG1	Adgrg1	1	1			1	0
606893	Vascular Malformation, Primary Intraosseous	606421	ELMO2	Elmo2	1	1			0	1
607014	Hurler Syndrome	252800	IDUA	Idua	1	1	PS607014	Mucopolysaccharidoses	0	1			['macrophage']
607091	Congenital Disorder Of Glycosylation, Type Iid	137060	B4GALT1	B4galt1	1	1	PS212066	Congenital disorders of glycosylation, type II	1	1
607143	Congenital Disorder Of Glycosylation, Type Ig	607144	ALG12	Alg12	1	1	PS212065	Congenital disorders of glycosylation, type I	0	0
607155	Muscular Dystrophy-dystroglycanopathy (limb-girdle), Type C, 5	606596	FKRP	Fkrp	1	1	PS253600	Muscular dystrophy, limb-girdle, autosomal recessive	1	1	Yes
607155	Muscular Dystrophy-dystroglycanopathy (limb-girdle), Type C, 5	606596	FKRP	Fkrp	1	1	PS609308	Muscular dystrophy-dystroglycanopathy, type C	1	1	Yes
607196	Microcephaly, Amish Type	606521	SLC25A19	Slc25a19	1	1	PS249270	Thiamine-responsive dysfunction syndrome	1	1		['macrophage']
607225	Spastic Paralysis, Infantile-onset Ascending	606352	ALS2	Als2	1	1			1	0
607236	Hypoprebetalipoproteinemia, Acanthocytosis, Retinitis Pigmentosa,and Pallidal Degeneration	606157	PANK2	Pank2	1	1			1	1
607250	Spinocerebellar Ataxia, Autosomal Recessive, With Axonal Neuropathy 1	607198	TDP1	Tdp1	1	1	PS607250	Spinocerebellar ataxia, autosomal recessive, with axonal neuropathy	1	1
607259	Spastic Paraplegia 7, Autosomal Recessive	602783	SPG7	Spg7	1	1	PS303350	Spastic paraplegia	1	1
607317	Spinocerebellar Ataxia, Autosomal Recessive 4	608877	VPS13D	Vps13d	1	1	PS213200	Spinocerebellar ataxia, autosomal recessive	1	0			['capillary endothelial cell', 'myelinating Schwann cell']
607323	Duane-radial Ray Syndrome	607343	SALL4	Sall4	1	1			0	0
607330	Lathosterolosis	602286	SC5D	Sc5d	1	1			1	1		['t cell']
607364	Bartter Syndrome, Type 3	602023	CLCNKB	Clcnka	1	1	PS601678	Bartter syndrome	0	0
607426	Coenzyme Q10 Deficiency, Primary, 1	609825	COQ2	Coq2	1	1	PS607426	Coenzyme Q10 deficiency, primary	1	1	Yes	['fast muscle cell', 'slow muscle cell']	['striated muscle cell']
607432	Lissencephaly 1	601545	PAFAH1B1	Pafah1b1	1	1	PS607432	Lissencephaly	1	1			['stromal cell', 'myelinating Schwann cell']
607459	Sensory Ataxic Neuropathy, Dysarthria, And Ophthalmoparesis	174763	POLG	Polg	1	1			1	1
607483	Basal Ganglia Disease, Biotin-responsive	606152	SLC19A3	Slc19a3	1	1	PS249270	Thiamine-responsive dysfunction syndrome	0	0		['macrophage']
607539	Camptosynpolydactyly, Complex	615416	BHLHA9	Bhlha9	1	1			0	0
607596	Pontocerebellar Hypoplasia, Type 1	602168	VRK1	Vrk1	1	1	PS607596	Pontocerebellar hypoplasia	1	1
607598	Lethal Congenital Contracture Syndrome 2	190151	ERBB3	Erbb3	1	1	PS253310	Lethal congenital contracture syndrome	1	0
607624	Griscelli Syndrome, Type 2	603868	RAB27A	Rab27a	1	1	PS214450	Griscelli syndrome	1	1
607625	Niemann-pick Disease, Type C2	601015	NPC2	Npc2	1	1			1	1
607641	Neuronopathy, Distal Hereditary Motor, Type Viib	601143	DCTN1	Dctn1	1	1			1	1
607677	Charcot-marie-tooth Disease, Axonal, Type 2i	159440	MPZ	Mpz	1	1	PS118220	Charcot-Marie-Tooth disease	1	1
607678	Charcot-marie-tooth Disease, Demyelinating, Type 1d	129010	EGR2	Egr2	1	1	PS118220	Charcot-Marie-Tooth disease	1	1	Yes
607684	Charcot-marie-tooth Disease, Axonal, Type 2e	162280	NEFL	Nefl	1	1	PS118220	Charcot-Marie-Tooth disease	0	0
607694	Leukodystrophy, Hypomyelinating, 7, With Or Without Oligodontia And/orhypogonadotropic Hypogonadism	614258	POLR3A	Polr3a	1	1	PS312080	Leukodystrophy, hypomyelinating	1	0
607706	Charcot-marie-tooth Disease, Axonal, With Vocal Cord Paresis, Autosomal	606598	GDAP1	Gdap1	1	1	PS118220	Charcot-Marie-Tooth disease	1	0
607721	Noonan Syndrome-like Disorder With Loose Anagen Hair	602775	SHOC2	Shoc2	1	1	PS163950	Noonan syndrome	1	1		['mast cell']
607721	Noonan Syndrome-like Disorder With Loose Anagen Hair	602775	SHOC2	Shoc2	1	1	PS607721	Noonan syndrome-like disorder with loose anagen hair	1	1
607734	Charcot-marie-tooth Disease, Demyelinating, Type 1f	162280	NEFL	Nefl	1	1	PS118220	Charcot-Marie-Tooth disease	0	0
607736	Charcot-marie-tooth Disease, Type 2j	159440	MPZ	Mpz	1	1	PS118220	Charcot-Marie-Tooth disease	1	1
607791	Charcot-marie-tooth Disease, Dominant Intermediate D	159440	MPZ	Mpz	1	1	PS118220	Charcot-Marie-Tooth disease	1	1
607822	Alzheimer Disease 3	104311	PSEN1	Psen1	1	1			1	1
607822	Alzheimer Disease 3	107741	APOE	Apoe	1	1			1	1
607831	Charcot-marie-tooth Disease, Axonal, Type 2k	605266	JPH1	Jph1	1	1	PS118220	Charcot-Marie-Tooth disease	1	1
607831	Charcot-marie-tooth Disease, Axonal, Type 2k	606598	GDAP1	Gdap1	1	1	PS118220	Charcot-Marie-Tooth disease	1	0
607855	Muscular Dystrophy, Congenital Merosin-deficient, 1a	156225	LAMA2	Lama2	1	1			1	1	Yes	['mesenchymal stem cell']
607932	Microphthalmia, Syndromic 6	112262	BMP4	Bmp4	1	1	PS309800	Microphthalmia, syndromic	1	1		['capillary endothelial cell']
607944	Spondyloenchondrodysplasia With Immune Dysregulation	171640	ACP5		1	1	PS184255	Spondylometaphyseal dysplasia	1	0
608013	Gaucher Disease, Perinatal Lethal	606463	GBA	Gba	1	1			0	1
608022	Diaphanospondylodysostosis	608699	BMPER	Bmper	1	1			1	1		['mesenchymal stem cell']	['skeletal muscle fibroblast; fibroblast']
608027	Cerebellar Atrophy With Progressive Microcephaly	604918	PCLO	Pclo	1	1	PS607596	Pontocerebellar hypoplasia	1	0
608030	Amyotrophic Lateral Sclerosis 6, With Or Without Frontotemporal Dementia	137070	FUS		1	1	PS105400	Amyotrophic lateral sclerosis	1	0
608033	Necrotizing Encephalopathy, Acute, Autosomal Dominant	601181	RANBP2		1	1	PS610551	Encephalopathy, acute, infection-induced	1	0		['macrophage', 't cell']
608091	Joubert Syndrome 2	613277	TMEM216	Tmem216	1	1	PS213300	Joubert syndrome	1	0			['smooth muscle cell']
608093	Congenital Disorder Of Glycosylation, Type Ij	191350	DPAGT1	Dpagt1	1	1	PS212065	Congenital disorders of glycosylation, type I	1	1	Yes
608097	Periventricular Heterotopia With Microcephaly, Autosomal Recessive	605371	ARFGEF2	Arfgef2	1	1	PS300049	Periventricular nodular heterotopia	1	0
608099	Muscular Dystrophy, Limb-girdle, Type 2d	600119	SGCA	Sgca	1	1	PS253600	Muscular dystrophy, limb-girdle, autosomal recessive	1	1	Yes
608104	Congenital Disorder Of Glycosylation, Type Ih	608103	ALG8	Alg8	1	1	PS212065	Congenital disorders of glycosylation, type I	1	0
608323	Charcot-marie-tooth Disease, Dominant Intermediate C	603623	YARS1	Yars	1	1	PS118220	Charcot-Marie-Tooth disease	0	1
608340	Charcot-marie-tooth Disease, Recessive Intermediate A	606598	GDAP1	Gdap1	1	1	PS118220	Charcot-Marie-Tooth disease	1	0
608358	Myopathy, Myosin Storage	160760	MYH7	Myh7	1	1			1	0		['slow muscle cell']
608390	Myotonia, Potassium-aggravated	603967	SCN4A	Scn4a	1	1			1	0		['capillary endothelial cell']
608423	Muscular Dystrophy, Limb-girdle, Type 1f	610032	TNPO3	Tnpo3	1	1	PS603511	Muscular dystrophy, limb-girdle, autosomal dominant	1	1	Yes	['mesenchymal stem cell', 'tendon cell']	['stromal cell']
608443	Mental Retardation, Autosomal Recessive 3	610055	CC2D1A	Cc2d1a	1	1	PS249500	Mental retardation, autosomal recessive	1	0
608540	Congenital Disorder Of Glycosylation, Type Ik	605907	ALG1	Alg1	1	1	PS212065	Congenital disorders of glycosylation, type I	0	1
608572	Burn-mckeown Syndrome	611595	TXNL4A	Txnl4a	1	1			1	1
608594	Lipodystrophy, Congenital Generalized, Type 1	603100	AGPAT2	Agpat2	1	1	PS608594	Lipodystrophy, congenital generalized	1	0
608611	Ribose 5-phosphate Isomerase Deficiency	180430	RPIA	Rpia	1	1			1	1		['erythrocyte']
608612	Mandibuloacral Dysplasia With Type B Lipodystrophy	606480	ZMPSTE24	Zmpste24	1	1	PS248370	Mandibuloacral dysplasia with lipodystrophy	1	1
608627	Amyotrophic Lateral Sclerosis 8	605704	VAPB	Vapb	1	1	PS105400	Amyotrophic lateral sclerosis	1	1
608629	Joubert Syndrome 3	608894	AHI1	Ahi1	1	1	PS213300	Joubert syndrome	1	1			['smooth muscle cell']
608634	Neuronopathy, Distal Hereditary Motor, Type Iib	602195	HSPB1	Hspb1	1	1			1	1
608643	Aromatic L-amino Acid Decarboxylase Deficiency	107930	DDC	Ddc	1	1			0	0
608673	Charcot-marie-tooth Disease, Axonal, Type 2l	608014	HSPB8	Hspb8	1	1	PS118220	Charcot-Marie-Tooth disease	1	1
608688	Aicar Transformylase/imp Cyclohydrolase, Deficiency Of	601731	ATIC	Atic	1	1			1	1
608768	Spinocerebellar Ataxia 8	613289	ATXN8		1	1	PS164400	Spinocerebellar ataxia	0	0			['smooth muscle cell']
608768	Spinocerebellar Ataxia 8	603680	ATXN8OS		1	1	PS164400	Spinocerebellar ataxia	0	0			['smooth muscle cell']
608776	Congenital Disorder Of Glycosylation, Type Il	606941	ALG9	Alg9	1	1	PS212065	Congenital disorders of glycosylation, type I	0	0
608779	Congenital Disorder Of Glycosylation, Type Iie	606978	COG7	Cog7	1	1	PS212066	Congenital disorders of glycosylation, type II	1	1
608782	Pyruvate Dehydrogenase Phosphatase Deficiency	605993	PDP1	Pdp1	1	1	PS312170	Pyruvate dehydrogenase complex deficiency	1	1		['fast muscle cell', 'slow muscle cell']	['striated muscle cell']
608799	Congenital Disorder Of Glycosylation, Type Ie	603503	DPM1	Dpm1	1	1	PS212065	Congenital disorders of glycosylation, type I	1	1
608804	Leukodystrophy, Hypomyelinating, 2	608803	GJC2	Gjc2	1	1	PS312080	Leukodystrophy, hypomyelinating	1	1
608807	Muscular Dystrophy, Limb-girdle, Type 2j	188840	TTN	Ttn	1	1	PS253600	Muscular dystrophy, limb-girdle, autosomal recessive	1	1	Yes
608810	Alpha-b Crystallinopathy	123590	CRYAB	Cryab	1	1	PS601419	Myopathy, myofibrillar	1	1	Yes	['fast muscle cell', 'slow muscle cell']	['striated muscle cell']
608836	Carnitine Palmitoyltransferase Ii Deficiency, Lethal Neonatal	600650	CPT2	Cpt2	1	1			0	0
608837	Carney Complex Variant	160741	MYH8	Myh8	1	1			0	0
608840	Muscular Dystrophy, Congenital, Type 1d	603590	LARGE1	Large1	1	1	PS613155	Muscular dystrophy-dystroglycanopathy, type B	1	0		['smooth muscle cell']
608885	Stomatin-deficient Cryohydrocytosis With Neurologic Defects	138140	SLC2A1	Slc2a1	1	1			1	1		['tendon cell']	['smooth muscle cell']
608895	Macular Degeneration, Age-related, 3	604580	FBLN5	Fbln5	1	1	PS603075	Macular degeneration, age-related	1	1		['mesenchymal stem cell']	['endothelial cell of artery']
608930	Myasthenic Syndrome, Congenital, 1b, Fast-channel	100690	CHRNA1	Chrna1	1	1	PS601462	Myasthenic syndrome, congenital	1	1	Yes
608931	Myasthenic Syndrome, Congenital, Associated With Acetylcholine Receptordeficiency	100725	CHRNE	Chrne	1	1	PS601462	Myasthenic syndrome, congenital	0	1	Yes
609015	Trifunctional Protein Deficiency	600890	HADHA	Hadha	1	1			1	1		['slow muscle cell']
609015	Trifunctional Protein Deficiency	143450	HADHB	Hadhb	1	1			1	1		['slow muscle cell']
609033	Ataxia, Posterior Column, With Retinitis Pigmentosa	609144	FLVCR1	Flvcr1	1	1			1	0
609049	Pierson Syndrome	150325	LAMB2	Lamb2	1	1			1	1
609056	Amish Infantile Epilepsy Syndrome	604402	ST3GAL5	St3gal5	1	1			1	1
609060	Combined Oxidative Phosphorylation Deficiency 1	606639	GFM1	Gfm1	1	1	PS609060	Combined oxidative phosphorylation deficiency	1	1		['fast muscle cell', 'slow muscle cell']	['striated muscle cell', 'myelinating Schwann cell']
609115	Limb-girdle Muscular Dystrophy, Type 1g	607137	HNRNPDL	Hnrnpdl	1	1	PS603511	Muscular dystrophy, limb-girdle, autosomal dominant	1	0	Yes	['mesenchymal stem cell', 'tendon cell']	['stromal cell']
609136	Peripheral Demyelinating Neuropathy, Central Dysmyelination, Waardenburg	602229	SOX10	Sox10	1	1			0	1
609153	Pseudohyperkalemia, Familial, 2, Due To Red Cell Leak	605452	ABCB6	Abcb6	1	1			0	0
609162	Czech Dysplasia, Metatarsal Type	120140	COL2A1	Col2a1	1	1			0	1			['tendon cell']
609180	Congenital Disorder Of Glycosylation, Type If	604041	MPDU1	Mpdu1	1	1	PS212065	Congenital disorders of glycosylation, type I	1	1
609192	Loeys-dietz Syndrome, Type 1a Loeys-dietz Aortic Aneurysm Syndrome	190181	TGFBR1	Tgfbr1	1	1	PS607086	Aortic aneurysm, familial thoracic	1	1			['skeletal muscle fibroblast; fibroblast.1']
609192	Loeys-dietz Syndrome, Type 1a Loeys-dietz Aortic Aneurysm Syndrome	190181	TGFBR1	Tgfbr1	1	1	PS609192	Loeys-Dietz syndrome	1	1		['endothelial cell of lymphatic vessel']	['tendon cell']
609195	Spastic Paraplegia 26, Autosomal Recessive	601873	B4GALNT1	B4galnt1	1	1	PS303350	Spastic paraplegia	1	1
609200	Myotilinopathy	604103	MYOT	Myot	1	1	PS601419	Myopathy, myofibrillar	1	1	Yes	['fast muscle cell', 'slow muscle cell']	['striated muscle cell']
609220	Bruck Syndrome 2	601865	PLOD2	Plod2	1	1			1	1
609241	Schindler Disease, Type I	104170	NAGA	Naga	1	1			1	1
609242	Kanzaki Disease	104170	NAGA	Naga	1	1			1	1			['monocyte-derived dendritic cell']
609260	Charcot-marie-tooth Disease, Axonal, Type 2a2a	608507	MFN2	Mfn2	1	1	PS118220	Charcot-Marie-Tooth disease	1	1
609273	Nemaline Myopathy 6	613727	KBTBD13	Kbtbd13	1	1	PS161800	Nemaline myopathy	0	0	Yes	['fast muscle cell', 'slow muscle cell']	['striated muscle cell']
609283	Progressive External Ophthalmoplegia With Mitochondrial Dna Deletions,autosomal Dominant, 2	103220	SLC25A4	Slc25a4	1	1	PS157640	Progressive external ophthalmoplegia with mtDNA deletions	1	1	Yes
609284	Nemaline Myopathy 1	191030	TPM3	Tpm3	1	1	PS161800	Nemaline myopathy	1	1	Yes	['fast muscle cell', 'slow muscle cell']	['striated muscle cell']
609285	Nemaline Myopathy 4	190990	TPM2		1	1	PS161800	Nemaline myopathy	1	0	Yes	['fast muscle cell', 'slow muscle cell']	['striated muscle cell']
609286	Progressive External Ophthalmoplegia With Mitochondrial Dna Deletions,autosomal Dominant, 3	606075	TWNK	Twnk	1	1	PS157640	Progressive external ophthalmoplegia with mtDNA deletions	1	0
609304	Epileptic Encephalopathy, Early Infantile, 3	609302	SLC25A22	Slc25a22	1	1	PS308350	Developmental and epileptic encephalopathy	1	0
609308	Muscular Dystrophy, Limb-girdle, Type 2k	607423	POMT1	Pomt1	1	1	PS253600	Muscular dystrophy, limb-girdle, autosomal recessive	0	0	Yes
609308	Muscular Dystrophy, Limb-girdle, Type 2k	607423	POMT1	Pomt1	1	1	PS609308	Muscular dystrophy-dystroglycanopathy, type C	0	0	Yes
609311	Charcot-marie-tooth Disease, Type 4h	611104	FGD4	Fgd4	1	1	PS118220	Charcot-Marie-Tooth disease	1	0
609313	Mental Retardation, Enteropathy, Deafness, Peripheral Neuropathy,ichthyosis, And Keratoderma	603531	AP1S1	Ap1s1	1	1			1	1
609340	Spastic Paraplegia 28, Autosomal Recessive	614603	DDHD1	Ddhd1	1	1	PS303350	Spastic paraplegia	1	1
609446	Paroxysmal Nonkinesigenic Dyskinesia, 3, With Or Without Generalized Epilepsy	600150	KCNMA1	Kcnma1	1	1			1	1			['tendon cell']
609452	Myopathy, Myofibrillar, Zasp-related	605906	LDB3	Ldb3	1	1	PS601419	Myopathy, myofibrillar	1	1	Yes	['fast muscle cell', 'slow muscle cell']	['striated muscle cell']
609460	Goldberg-shprintzen Syndrome	609367	KIFBP	Kifbp	1	1			0	0
609524	Filaminopathy, Autosomal Dominant	102565	FLNC	Flnc	1	1	PS601419	Myopathy, myofibrillar	1	1	Yes	['fast muscle cell', 'slow muscle cell']	['striated muscle cell']
609528	Cerebral Dysgenesis, Neuropathy, Ichthyosis, And Palmoplantar Keratodermasyndrome	604202	SNAP29	Snap29	1	1			1	1
609541	Spastic Paraplegia, Optic Atrophy, And Neuropathy	611729	KLC2	Klc2	1	1			1	0
609560	Mitochondrial Dna Depletion Syndrome, Myopathic Form	188250	TK2	Tk2	1	1	PS603041	Mitochondrial DNA depletion syndrome	1	1	Yes
609583	Joubert Syndrome 4	607100	NPHP1	Nphp1	1	1	PS213300	Joubert syndrome	0	0			['smooth muscle cell']
609628	Majeed Syndrome	605519	LPIN2	Lpin2	1	1			1	1
609924	Aminoacylase 1 Deficiency	104620	ACY1	Acy1	1	1			0	1
610006	2-@methylbutyryl-coa Dehydrogenase Deficiency	600301	ACADSB	Acadsb	1	1			1	1
610015	Glutamine Deficiency, Congenital	138290	GLUL	Glul	1	1			1	1
610031	Cortical Dysplasia, Complex, With Other Brain Malformations 7	612850	TUBB2B	Tubb2b	1	1	PS614039	Cortical dysplasia, complex, with other brain malformations	1	1
610042	Cortical Dysplasia-focal Epilepsy Syndrome	604569	CNTNAP2	Cntnap2	1	1			0	0
610090	Pyridoxamine 5-prime-phosphate Oxidase Deficiency	603287	PNPO	Pnpo	1	1			1	1
610100	Giant Axonal Neuropathy, Autosomal Dominant	615820	DCAF8	Dcaf8	1	1	PS256850	Giant axonal neuropathy	1	1
610125	Microphthalmia, Syndromic 5	600037	OTX2	Otx2	1	1	PS309800	Microphthalmia, syndromic	0	0		['capillary endothelial cell']
610127	Ceroid Lipofuscinosis, Neuronal, 10	116840	CTSD	Ctsd	1	1	PS256730	Ceroid lipofuscinoses	1	1		['macrophage']
610131	Progressive External Ophthalmoplegia With Mitochondrial Dna Deletions,	604983	POLG2	Polg2	1	1	PS157640	Progressive external ophthalmoplegia with mtDNA deletions	1	1
610140	Heart-hand Syndrome, Slovenian Type	150330	LMNA	Lmna	1	1			1	1		['mast cell']
610168	Loeys-dietz Syndrome, Type 1b	190182	TGFBR2	Tgfbr2	1	1	PS607086	Aortic aneurysm, familial thoracic	1	1			['skeletal muscle fibroblast; fibroblast.1']
610168	Loeys-dietz Syndrome, Type 1b	190182	TGFBR2	Tgfbr2	1	1	PS609192	Loeys-Dietz syndrome	1	1		['endothelial cell of lymphatic vessel']	['tendon cell']
610181	Aicardi-goutieres Syndrome 2	610326	RNASEH2B	Rnaseh2b	1	1	PS225750	Aicardi-Goutieres syndrome	1	1			['blood vessel endothelial cell']
610187	Diaphragmatic Hernia 3	603693	ZFPM2	Zfpm2	1	1			1	0
610188	Joubert Syndrome 5	610142	CEP290	Cep290	1	1	PS213300	Joubert syndrome	1	0			['smooth muscle cell']
610198	3-@methylglutaconic Aciduria, Type V	608977	DNAJC19	Dnajc19-ps	1	1	PS250950	3-Methylglutaconic aciduria	1	0	Yes
610198	3-@methylglutaconic Aciduria, Type V	608977	DNAJC19	Dnajc19	1	1	PS250950	3-Methylglutaconic aciduria	1	1	Yes
610217	Neurodegeneration With Brain Iron Accumulation 2b	603604	PLA2G6	Pla2g6	1	1	PS234200	Neurodegeneration with brain iron accumulation	0	0
610244	Spastic Paraplegia 33, Autosomal Dominant	610243	ZFYVE27	Zfyve27	1	1	PS303350	Spastic paraplegia	1	1
610246	Spinocerebellar Ataxia 28	604581	AFG3L2	Afg3l2	1	1	PS164400	Spinocerebellar ataxia	1	1			['smooth muscle cell']
610250	Spastic Paraplegia 31, Autosomal Dominant	609139	REEP1	Reep1	1	1	PS303350	Spastic paraplegia	1	1
610253	Kleefstra Syndrome	607001	EHMT1	Ehmt1	1	1	PS156200	Mental retardation, autosomal dominant	1	1
610253	Kleefstra Syndrome	607001	EHMT1	Ehmt1	1	1	PS610253	Kleefstra syndrome	1	1
610313	Cold-induced Sweating Syndrome 2	607672	CLCF1	Clcf1	1	1	PS272430	Cold-induced sweating syndrome	1	0			['skeletal muscle satellite cell']
610329	Aicardi-goutieres Syndrome 3	610330	RNASEH2C	Rnaseh2c	1	1	PS225750	Aicardi-Goutieres syndrome	1	1			['blood vessel endothelial cell']
610333	Aicardi-goutieres Syndrome 4	606034	RNASEH2A	Rnaseh2a	1	1	PS225750	Aicardi-Goutieres syndrome	0	0			['blood vessel endothelial cell']
610357	Spastic Paraplegia 30, Autosomal Recessive	601255	KIF1A	Kif1a	1	1	PS303350	Spastic paraplegia	0	0
610377	Mevalonic Aciduria	251170	MVK	Mvk	1	1			0	1			['T-helper 17 cell']
610442	Spondyloepimetaphyseal Dysplasia, Genevieve Type	605202	NANS	Nans	1	1			1	1
610443	Koolen-de Vries Syndrome	612452	KANSL1	Kansl1	1	1	PS156200	Mental retardation, autosomal dominant	1	0
610455	Tumoral Calcinosis, Normophosphatemic, Familial	610456	SAMD9		1	1			1	0
610474	Camptodactyly, Tall Stature, And Hearing Loss Syndrome	134934	FGFR3	Fgfr3	1	1			0	1			['endothelial cell of artery']
610498	Combined Oxidative Phosphorylation Deficiency 2	609204	MRPS16	Mrps16	1	1	PS609060	Combined oxidative phosphorylation deficiency	1	1		['fast muscle cell', 'slow muscle cell']	['striated muscle cell', 'myelinating Schwann cell']
610505	Combined Oxidative Phosphorylation Deficiency 3	604723	TSFM	Tsfm	1	1	PS609060	Combined oxidative phosphorylation deficiency	0	1		['fast muscle cell', 'slow muscle cell']	['striated muscle cell', 'myelinating Schwann cell']
610532	Hypomyelination And Congenital Cataract	610531	FAM126A	Fam126a	1	1	PS312080	Leukodystrophy, hypomyelinating	1	1
610542	Myasthenic Syndrome, Congenital, With Tubular Aggregates 1	138292	GFPT1	Gfpt1	1	1	PS601462	Myasthenic syndrome, congenital	1	1	Yes
610542	Myasthenic Syndrome, Congenital, With Tubular Aggregates 1	138292	GFPT1	Gfpt1	1	1	PS610542	Myasthenic syndrome, congenital, with tubular aggregates	1	1	Yes
610623	Cataract 11, Multiple Types	602669	PITX3	Pitx3	1	1	PS116200	Cataract	0	0
610678	Combined Oxidative Phosphorylation Deficiency 4	602389	TUFM	Tufm	1	1	PS609060	Combined oxidative phosphorylation deficiency	1	1		['fast muscle cell', 'slow muscle cell']	['striated muscle cell', 'myelinating Schwann cell']
610687	Nemaline Myopathy 7	601443	CFL2	Cfl2	1	1	PS161800	Nemaline myopathy	1	1	Yes	['fast muscle cell', 'slow muscle cell']	['striated muscle cell']
610688	Joubert Syndrome 6	609884	TMEM67	Tmem67	1	1	PS213300	Joubert syndrome	0	1			['smooth muscle cell']
610713	Brachydactyly-syndactyly Syndrome	142989	HOXD13	Hoxd13	1	1			0	0
610717	Neutral Lipid Storage Disease With Myopathy	609059	PNPLA2	Pnpla2	1	1			1	1
610743	Spinocerebellar Ataxia, Autosomal Recessive 8	608441	SYNE1	Syne1	1	1	PS213200	Spinocerebellar ataxia, autosomal recessive	1	1			['capillary endothelial cell', 'myelinating Schwann cell']
610756	Cerebrooculofacioskeletal Syndrome 2	126340	ERCC2	Ercc2	1	1	PS214150	Cerebrooculofacioskeletal syndrome	0	0
610758	Cerebrooculofacioskeletal Syndrome 4	126380	ERCC1	Ercc1	1	1	PS214150	Cerebrooculofacioskeletal syndrome	1	1
610954	Pitt-hopkins Syndrome	602272	TCF4	Tcf4	1	1			1	1
610978	Choreoathetosis, Hypothyroidism, And Neonatal Respiratory Distresschoreoathetosis And Congenital Hypothyroidism, Included	600635	NKX2-1	Nkx2-1	1	1			0	0
610992	Phosphoserine Aminotransferase Deficiency	610936	PSAT1	Psat1	1	1			0	1			['stromal cell']
611067	Spinal Muscular Atrophy, Distal, Autosomal Recessive, 4	611101	PLEKHG5	Plekhg5	1	1			0	1
611087	Polyhydramnios, Megalencephaly, And Symptomatic Epilepsy	608626	STRADA	Strada	1	1			0	0
611091	Mental Retardation, Autosomal Recessive 5	610916	NSUN2	Nsun2	1	1	PS249500	Mental retardation, autosomal recessive	1	1
611105	Leukoencephalopathy With Brainstem And Spinal Cord Involvement Andlactate Elevation	610956	DARS2	Dars2	1	1			0	1			['T-helper 17 cell']
611126	Acyl-coa Dehydrogenase Family, Member 9, Deficiency Of	611103	ACAD9	Acad9	1	1	PS252010	Mitochondrial complex I deficiency, nuclear type	1	0		['fast muscle cell', 'slow muscle cell']	['striated muscle cell']
611182	Congenital Disorder Of Glycosylation, Type Iih	606979	COG8	Cog8	1	1	PS212066	Congenital disorders of glycosylation, type II	0	0
611209	Congenital Disorder Of Glycosylation, Type Iig	606973	COG1	Cog1	1	1	PS212066	Congenital disorders of glycosylation, type II	0	1
611225	Spastic Paraplegia 18, Autosomal Recessive	611605	ERLIN2	Erlin2	1	1	PS303350	Spastic paraplegia	1	1
611228	Charcot-marie-tooth Disease, Type 4j	609390	FIG4	Fig4	1	1	PS118220	Charcot-Marie-Tooth disease	1	0
611302	Ataxia, Spastic, 2, Autosomal Recessive	603060	KIF1C	Kif1c	1	1	PS108600	Spastic ataxia	1	1		['skeletal muscle satellite stem cell']
611307	Muscular Dystrophy, Limb-girdle, Type 2l	608662	ANO5	Ano5	1	1	PS253600	Muscular dystrophy, limb-girdle, autosomal recessive	0	0	Yes
611369	Lethal Congenital Contracture Syndrome 3	606102	PIP5K1C	Pip5k1c	1	1	PS253310	Lethal congenital contracture syndrome	1	1
611390	Ataxia, Spastic, 3, Autosomal Recessive	609728	MARS2	Mars2	1	1	PS108600	Spastic ataxia	1	0		['skeletal muscle satellite stem cell']
611431	Legius Syndrome	609291	SPRED1	Spred1	1	1			1	1
611489	Corticosteroid-binding Globulin Deficiency	122500	SERPINA6	Serpina6	1	1			0	0
611490	Osteopetrosis, Autosomal Recessive 4	602727	CLCN7	Clcn7	1	1	PS259700	Osteopetrosis, autosomal recessive	1	1		['macrophage']
611523	Pontocerebellar Hypoplasia, Type 6	611524	RARS2	Rars2	1	1	PS607596	Pontocerebellar hypoplasia	1	0
611556	Glycogen Storage Disease 0, Muscle	138570	GYS1	Gys1	1	1			1	1		['fast muscle cell']
611560	Joubert Syndrome 7	610937	RPGRIP1L	Rpgrip1l	1	1	PS213300	Joubert syndrome	0	0			['smooth muscle cell']
611584	Waardenburg Syndrome, Type 2e	602229	SOX10	Sox10	1	1	PS193500	Waardenburg syndrome	0	1		['endothelial cell of lymphatic vessel', 'pericyte cell']
611588	Muscular Dystrophy, Limb-girdle, Type 2m	607440	FKTN	Fktn	1	1	PS253600	Muscular dystrophy, limb-girdle, autosomal recessive	1	0	Yes
611588	Muscular Dystrophy, Limb-girdle, Type 2m	607440	FKTN	Fktn	1	1	PS609308	Muscular dystrophy-dystroglycanopathy, type C	1	0	Yes
611603	Lissencephaly 3	602529	TUBA1A	Tuba1a	1	1	PS607432	Lissencephaly	1	1			['stromal cell', 'myelinating Schwann cell']
611615	Cardiomyopathy, Dilated, 1x	607440	FKTN	Fktn	1	1	PS115200	Dilated cardiomyopathy	1	0	Yes
611705	Myopathy, Early-onset, With Fatal Cardiomyopathy	188840	TTN	Ttn	1	1			1	1		['fast muscle cell']
611719	Combined Oxidative Phosphorylation Deficiency 5	605810	MRPS22	Mrps22	1	1	PS609060	Combined oxidative phosphorylation deficiency	1	0		['fast muscle cell', 'slow muscle cell']	['striated muscle cell', 'myelinating Schwann cell']
611721	Combined Saposin Deficiency	176801	PSAP	Psap	1	1			1	1
611722	Krabbe Disease, Atypical, Due To Saposin A Deficiency	176801	PSAP	Psap	1	1			1	1
611773	Angiopathy, Hereditary, With Nephropathy, Aneurysms, And Muscle Cramps	120130	COL4A1	Col4a1	1	1			1	1		['mesenchymal stem cell']	['skeletal muscle fibroblast; fibroblast']
611812	46,xx Sex Reversal With Dysgenesis Of Kidneys, Adrenals, And Lungs	603490	WNT4	Wnt4	1	1			0	0
611816	Temple-baraitser Syndrome	603305	KCNH1	Kcnh1	1	1			0	0
611881	Glycogen Storage Disease Xii	103850	ALDOA	Aldoa	1	1			1	1		['fast muscle cell']	['striated muscle cell']
611890	Congenital Arthrogryposis With Anterior Horn Cell Disease	603371	GLE1	Gle1	1	1			0	1
611895	Amyotrophic Lateral Sclerosis 9	105850	ANG	Ang	1	1	PS105400	Amyotrophic lateral sclerosis	1	1
612015	Congenital Disorder Of Glycosylation, Type In	611908	RFT1	Rft1	1	1	PS212065	Congenital disorders of glycosylation, type I	1	0
612016	Coenzyme Q10 Deficiency, Primary, 4	606980	COQ8A	Coq8a	1	1	PS213200	Spinocerebellar ataxia, autosomal recessive	1	0	Yes		['capillary endothelial cell', 'myelinating Schwann cell']
612016	Coenzyme Q10 Deficiency, Primary, 4	606980	COQ8A	Coq8a	1	1	PS607426	Coenzyme Q10 deficiency, primary	1	0	Yes	['fast muscle cell', 'slow muscle cell']	['striated muscle cell']
612020	Spastic Paraplegia 39, Autosomal Recessive	603197	PNPLA6	Pnpla6	1	1	PS303350	Spastic paraplegia	1	1
612067	Dystonia 16	603424	PRKRA	Prkra	1	1	PS128100	Dystonia	1	1
612069	Amyotrophic Lateral Sclerosis 10, With Or Without Frontotemporal Dementia	605078	TARDBP	Tardbp	1	1	PS105400	Amyotrophic lateral sclerosis	1	1
612073	Mitochondrial Dna Depletion Syndrome, Encephalomyopathic Form, With	603921	SUCLA2	Sucla2	1	1	PS603041	Mitochondrial DNA depletion syndrome	1	1	Yes
612075	Mitochondrial Dna Depletion Syndrome 8a (encephalomyopathic Type Withrenal Tubulopathy)	604712	RRM2B	Rrm2b	1	1	PS603041	Mitochondrial DNA depletion syndrome	1	1	Yes
612079	Alopecia, Neurologic Defects, And Endocrinopathy Syndrome	612074	RBM28	Rbm28	1	1			1	1
612138	Epidermolysis Bullosa Simplex With Pyloric Atresia	601282	PLEC	Plec	1	1			1	1
612164	Epileptic Encephalopathy, Early Infantile, 4	602926	STXBP1	Stxbp1	1	1	PS308350	Developmental and epileptic encephalopathy	1	1
612199	Cerebroretinal Microangiopathy With Calcifications And Cysts	613129	CTC1	Ctc1	1	1	PS612199	Cerebroretinal microangiopathy with calcfications and cysts	0	0
612233	Leukodystrophy, Hypomyelinating, Autosomal Recessive	118190	HSPD1	Hspd1	1	1	PS312080	Leukodystrophy, hypomyelinating	1	1
612289	Fontaine Progeroid Syndrome	608744	SLC25A24	Slc25a24	1	1			1	1
612291	Joubert Syndrome 8	608922	ARL13B	Arl13b	1	1	PS213300	Joubert syndrome	1	1			['smooth muscle cell']
612300	Hemolytic Anemia, Cd59-mediated, With Or Without Immune-mediated Polyneuropathy	107271	CD59	Cd59b	1	1			1	1
612301	Osteopetrosis, Autosomal Recessive 7	603499	TNFRSF11A	Tnfrsf11a	1	1	PS259700	Osteopetrosis, autosomal recessive	1	1		['macrophage']
612313	Glass Syndrome	608148	SATB2	Satb2	1	1			0	0
612319	Spastic Paraplegia 35, Autosomal Recessive	611026	FA2H	Fa2h	1	1	PS303350	Spastic paraplegia	0	1
612337	Chromosome 1q43-q44 Deletion Syndrome	608433	ZBTB18	Zbtb18	1	1	PS156200	Mental retardation, autosomal dominant	1	0
612350	Ehlers-danlos Syndrome, Spondylodysplastic Type, 3	608735	SLC39A13	Slc39a13	1	1	PS130000	Ehlers-Danlos syndrome	1	1		['mesenchymal stem cell', 'tendon cell']	['tendon cell', 'stromal cell']
612379	Coloboma, Ocular, And Ichthyosis, Brain Malformations, And Endocrine	611715	SRD5A3	Srd5a3	1	1	PS212065	Congenital disorders of glycosylation, type I	1	1
612387	Sarcoidosis, Susceptibility To, 2	606000	BTNL2	Btnl2	1	1			0	0
612389	Pontocerebellar Hypoplasia, Type 2b	608753	TSEN2	Tsen2	1	1	PS607596	Pontocerebellar hypoplasia	0	0
612394	Bone Fragility With Contractures, Arterial Rupture, And Deafness	603066	PLOD3	Plod3	1	1			1	1
612438	Leukodystrophy, Hypomyelinating, 6	602662	TUBB4A	Tubb4a	1	1	PS312080	Leukodystrophy, hypomyelinating	0	1
612539	Spastic Paraplegia 42, Autosomal Dominant	603690	SLC33A1	Slc33a1	1	1	PS303350	Spastic paraplegia	1	0
612540	Myopathy, Congenital, Compton-north	600016	CNTN1	Cntn1	1	1			0	0
612562	Diamond-blackfan Anemia 7	604175	RPL11	Rpl11	1	1	PS105650	Diamond-Blackfan anemia	1	1		['cd4-positive, alpha-beta t cell', 'cd8-positive, alpha-beta t cell', 'mast cell', 'mesothelial cell']	['skeletal muscle satellite cell', 'CD8-positive, alpha-beta T cell', 'B cell']
612577	Amyotrophic Lateral Sclerosis 11	609390	FIG4	Fig4	1	1	PS105400	Amyotrophic lateral sclerosis	1	0
612621	Mental Retardation, Autosomal Dominant 5	603384	SYNGAP1	Syngap1	1	1	PS156200	Mental retardation, autosomal dominant	1	0
612649	Ciliary Dyskinesia, Primary, 11	612647	RSPH4A	Rsph4a	1	1	PS244400	Primary ciliary dyskinesia	0	0
612650	Ciliary Dyskinesia, Primary, 12	612648	RSPH9	Rsph9	1	1	PS244400	Primary ciliary dyskinesia	0	0
612656	Episodic Ataxia, Type 6	600111	SLC1A3	Slc1a3	1	1	PS160120	Episodic ataxia	1	1
612674	Polyneuropathy, Hearing Loss, Ataxia, Retinitis Pigmentosa, And Cataract	613599	ABHD12	Abhd12	1	1			1	1
612713	Kahrizi Syndrome	611715	SRD5A3	Srd5a3	1	1			1	1
612716	Dystonia, Dopa-responsive, Due To Sepiapterin Reductase Deficiency	182125	SPR	Spr	1	1			1	1
612718	Cerebral Creatine Deficiency Syndrome 3	602360	GATM	Gatm	1	1	PS300352	Cerebral creatine deficiency syndrome	1	1			['myelinating Schwann cell']
612736	Cerebral Creatine Deficiency Syndrome 2	601240	GAMT	Gamt	1	1	PS300352	Cerebral creatine deficiency syndrome	1	1			['myelinating Schwann cell']
612740	Porphyria, Acute Hepatic	125270	ALAD	Alad	1	1			1	0
612780	Seizures, Sensorineural Deafness, Ataxia, Mental Retardation, And	602208	KCNJ10	Kcnj10	1	1			0	0
612782	Immunodeficiency 9	610277	ORAI1	Orai1	1	1	PS300755	Immunodeficiency (Select Examples)	1	1		['cd4-positive, alpha-beta t cell', 't cell']	['T-helper 17 cell']
612783	Immunodeficiency 10	605921	STIM1	Stim1	1	1	PS300755	Immunodeficiency (Select Examples)	1	0		['cd4-positive, alpha-beta t cell', 't cell']	['T-helper 17 cell']
612900	Cerebral Palsy, Spastic Quadriplegic, 2	607704	KANK1	Kank1	1	1	PS603513	Spastic quadriplegic cerebral palsy	1	1
612921	Three M Syndrome 2	610991	OBSL1		1	1	PS273750	Three M syndrome	1	0		['skeletal muscle satellite stem cell']
612932	Glycogen Storage Disease Xiii	131370	ENO3	Eno3	1	1			1	1		['fast muscle cell']	['striated muscle cell']
612933	Glycogen Storage Disease Xi	150000	LDHA	Ldha	1	1			1	1
612936	Cerebral Palsy, Spastic Quadriplegic, 3	602296	AP4M1	Ap4m1	1	1	PS303350	Spastic paraplegia	1	0
612937	Congenital Disorder Of Glycosylation, Type Io	605951	DPM3	Dpm3	1	1	PS212065	Congenital disorders of glycosylation, type I	1	1
612938	Growth Retardation, Developmental Delay, Coarse Facies, And Early	610966	FTO	Fto	1	1			1	1
612949	Hypomyelination, Global Cerebral	603667	SLC25A12	Slc25a12	1	1	PS308350	Developmental and epileptic encephalopathy	1	1
612951	Leukoencephalopathy, Cystic, Without Megalencephaly	612944	RNASET2	Rnaset2a	1	1			1	0
612951	Leukoencephalopathy, Cystic, Without Megalencephaly	612944	RNASET2	Rnaset2b	1	1			1	1
612952	Aicardi-goutieres Syndrome 5	606754	SAMHD1	Samhd1	1	1	PS225750	Aicardi-Goutieres syndrome	1	1			['blood vessel endothelial cell']
612953	Parkinson Disease 14, Autosomal Recessive	603604	PLA2G6	Pla2g6	1	1	PS168600	Parkinson disease	0	0
612954	Myopathy, Myofibrillar, 6	603883	BAG3	Bag3	1	1	PS601419	Myopathy, myofibrillar	1	1	Yes	['fast muscle cell', 'slow muscle cell']	['striated muscle cell']
612998	Emery-dreifuss Muscular Dystrophy 4	608441	SYNE1	Syne1	1	1	PS310300	Emery-Dreifuss muscular dystrophy	1	1	Yes
612999	Emery-dreifuss Muscular Dystrophy 5	608442	SYNE2	Syne2	1	1	PS310300	Emery-Dreifuss muscular dystrophy	1	1	Yes
613027	Glycogen Storage Disease Ixc	172471	PHKG2	Phkg2	1	1			0	1
613038	Pituitary Hormone Deficiency, Combined, 1	173110	POU1F1	Pou1f1	1	1	PS613038	Pituitary hormone deficiency, combined	0	0
613070	Liver Failure, Acute Infantile	610230	TRMU	Trmu	1	1			0	0
613076	Myopathy, Mitochondrial Progressive, With Congenital Cataract, Hearing Loss, And Developmental Delay	600924	GFER	Gfer	1	1			1	1
613077	Progressive External Ophthalmoplegia With Mitochondrial Dna Deletions,autosomal Dominant, 5	604712	RRM2B	Rrm2b	1	1	PS157640	Progressive external ophthalmoplegia with mtDNA deletions	1	1
613078	Nijmegen Breakage Syndrome-like Disorder	604040	RAD50	Rad50	1	1			1	1
613090	Bartter Syndrome, Type 4b	602024	CLCNKA	Clcnkb	1	1	PS601678	Bartter syndrome	0	0
613090	Bartter Syndrome, Type 4b	602023	CLCNKB	Clcnka	1	1	PS601678	Bartter syndrome	0	0
613115	Neuropathy, Hereditary Sensory And Autonomic, Type Iib	613114	RETREG1	Retreg1	1	1	PS162400	Hereditary sensory and autonomic neuropathy	1	0		['capillary endothelial cell']
613135	Parkinsonism-dystonia, Infantile	126455	SLC6A3	Slc6a3	1	1	PS613135	Parkinsonism-dystonia, infantile	0	0		['mast cell']
613150	Muscular Dystrophy-dystroglycanopathy (congenital With Brain And Eyeanomalies), Type A, 2	607439	POMT2	Pomt2	1	1	PS236670	Muscular dystrophy-dystroglycanopathy, type A	0	0
613151	Muscular Dystrophy-dystroglycanopathy (congenital With Mental Retardation),type B, 3	606822	POMGNT1	Pomgnt1	1	1	PS613155	Muscular dystrophy-dystroglycanopathy, type B	1	1		['smooth muscle cell']
613152	Muscular Dystrophy-dystroglycanopathy (congenital Without Mental Retardation),type B, 4	607440	FKTN	Fktn	1	1	PS613155	Muscular dystrophy-dystroglycanopathy, type B	1	0		['smooth muscle cell']
613153	Muscular Dystrophy-dystroglycanopathy (congenital With Brain And Eyeanomalies), Type A, 5	606596	FKRP	Fkrp	1	1	PS236670	Muscular dystrophy-dystroglycanopathy, type A	1	1
613154	Muscular Dystrophy-dystroglycanopathy (congenital With Brain And Eyeanomalies), Type A, 6	603590	LARGE1	Large1	1	1	PS236670	Muscular dystrophy-dystroglycanopathy, type A	1	0
613155	Muscular Dystrophy-dystroglycanopathy (congenital With Mental Retardation),type B, 1	607423	POMT1	Pomt1	1	1	PS613155	Muscular dystrophy-dystroglycanopathy, type B	0	0		['smooth muscle cell']
613156	Muscular Dystrophy-dystroglycanopathy (congenital With Mental Retardation),type B, 2	607439	POMT2	Pomt2	1	1	PS613155	Muscular dystrophy-dystroglycanopathy, type B	0	0		['smooth muscle cell']
613157	Muscular Dystrophy-dystroglycanopathy (limb-girdle), Type C, 3	606822	POMGNT1	Pomgnt1	1	1	PS253600	Muscular dystrophy, limb-girdle, autosomal recessive	1	1	Yes
613157	Muscular Dystrophy-dystroglycanopathy (limb-girdle), Type C, 3	606822	POMGNT1	Pomgnt1	1	1	PS609308	Muscular dystrophy-dystroglycanopathy, type C	1	1	Yes
613158	Muscular Dystrophy-dystroglycanopathy (limb-girdle), Type C, 2	607439	POMT2	Pomt2	1	1	PS253600	Muscular dystrophy, limb-girdle, autosomal recessive	0	0	Yes
613158	Muscular Dystrophy-dystroglycanopathy (limb-girdle), Type C, 2	607439	POMT2	Pomt2	1	1	PS609308	Muscular dystrophy-dystroglycanopathy, type C	0	0	Yes
613161	Beta-ureidopropionase Deficiency	606673	UPB1	Upb1	1	1			0	1			['monocyte-derived dendritic cell']
613162	Spastic Paraplegia 45, Autosomal Recessive	600417	NT5C2	Nt5c2	1	1	PS303350	Spastic paraplegia	1	1
613163	Gaba-transaminase Deficiency	137150	ABAT	Abat	1	1			0	1
613177	Cutis Laxa With Severe Pulmonary, Gastrointestinal, And Urinary Abnormalities	604710	LTBP4	Ltbp4	1	1	PS123700	Cutis laxa	1	1
613179	Immunodeficiency Due To Purine Nucleoside Phosphorylase Deficiency	164050	PNP	Pnp	1	1			1	1		['endothelial cell of vascular tree']
613179	Immunodeficiency Due To Purine Nucleoside Phosphorylase Deficiency	164050	PNP	Pnp2	1	1			1	0		['endothelial cell of vascular tree']
613180	Polymicrogyria With Optic Nerve Hypoplasia	605742	TUBA8	Tuba8	1	1	PS614039	Cortical dysplasia, complex, with other brain malformations	0	1
613204	Muscular Dystrophy, Congenital, Due To Integrin Alpha-7 Deficiency	600536	ITGA7	Itga7	1	1			1	1		['pericyte cell']
613205	Muscular Dystrophy, Congenital, Lmna-related	150330	LMNA	Lmna	1	1			1	1
613206	Spastic Paraplegia 44, Autosomal Recessive	608803	GJC2	Gjc2	1	1	PS303350	Spastic paraplegia	1	1
613224	Noonan Syndrome 6	164790	NRAS	Nras	1	1	PS163950	Noonan syndrome	1	1		['mast cell']
613239	Thyrotoxic Periodic Paralysis, Susceptibility To, 2	613236	KCNJ18		1	1	PS188580	Thyrotoxic periodic paralysis	0	0
613254	Tuberous Sclerosis-2	147570	IFNG	Ifng	1	1	PS191100	Tuberous sclerosis	1	0		['cd8-positive, alpha-beta t cell']
613254	Tuberous Sclerosis-2	191092	TSC2	Tsc2	1	1	PS191100	Tuberous sclerosis	1	1		['cd8-positive, alpha-beta t cell']
613280	Hypermanganesemia With Dystonia, Polycythemia, And Cirrhosis	611146	SLC30A10	Slc30a10	1	1	PS613280	Hypermanganesemia with dystonia	0	0			['skeletal muscle satellite cell']
613287	Charcot-marie-tooth Disease, Axonal, Type 2n	601065	AARS1	Aars	1	1	PS118220	Charcot-Marie-Tooth disease	0	1
613309	Diamond-blackfan Anemia 10	603701	RPS26	Rps26	1	1	PS105650	Diamond-Blackfan anemia	1	1		['cd4-positive, alpha-beta t cell', 'cd8-positive, alpha-beta t cell', 'mast cell', 'mesothelial cell']	['skeletal muscle satellite cell', 'CD8-positive, alpha-beta T cell', 'B cell']
613319	Miyoshi Muscular Dystrophy 3	608662	ANO5	Ano5	1	1	PS254130	Miyoshi muscular dystrophy	0	0	Yes
613320	Spondylometaphyseal Dysplasia, Megarbane-dagher-melki Type	614336	PAM16	Pam16	1	1	PS184255	Spondylometaphyseal dysplasia	0	1
613327	Lipodystrophy, Congenital Generalized, Type 4	603198	CAVIN1	Cavin1	1	1	PS608594	Lipodystrophy, congenital generalized	1	0
613330	Spondylo-megaepiphyseal-metaphyseal Dysplasia	602183	NKX3-2	Nkx3-2	1	1			0	0
613345	Hypokalemic Periodic Paralysis, Type 2	603967	SCN4A	Scn4a	1	1			1	0		['capillary endothelial cell']
613376	Neuronopathy, Distal Hereditary Motor, Type Iic	604624	HSPB3	Hspb3	1	1			1	1	Yes	['slow muscle cell']	['striated muscle cell']
613385	Autoimmune Disease, Multisystem, With Facial Dysmorphism	606409	ITCH	Itch	1	1			1	1
613388	Fanconi Renotubular Syndrome 2	182309	SLC34A1	Slc34a1	1	1	PS134600	Fanconi renotubular syndrome	0	0			['myelinating Schwann cell']
613398	Warsaw Breakage Syndrome	601150	DDX11	Ddx11	1	1			1	0
613402	Microcephaly, Seizures, And Developmental Delay	605610	PNKP	Pnkp	1	1	PS308350	Developmental and epileptic encephalopathy	1	1
613404	Arthrogryposis, Renal Dysfunction, And Cholestasis 2	613401	VIPAS39	Vipas39	1	1	PS208085	Arthrogryposis, renal dysfunction, and cholestasis	0	0
613406	Chromosome 15q24 Deletion Syndrome	607776	SIN3A	Sin3a	1	1			1	1
613435	Amyotrophic Lateral Sclerosis 12	602432	OPTN	Optn	1	1	PS105400	Amyotrophic lateral sclerosis	1	1
613443	Mental Retardation, Autosomal Dominant 20	600662	MEF2C	Mef2c	1	1	PS156200	Mental retardation, autosomal dominant	1	1
613454	Rett Syndrome, Congenital Variant	164874	FOXG1	Foxg1	1	1			0	0
613470	Hemolytic Anemia, Nonspherocytic, Due To Glucose Phosphate Isomerase	172400	GPI	Gpi1	1	1			1	1
613471	Reynolds Syndrome	600024	LBR	Lbr	1	1			1	1
613477	Epileptic Encephalopathy, Early Infantile, 5	182810	SPTAN1	Sptan1	1	1	PS308350	Developmental and epileptic encephalopathy	1	0
613489	Congenital Disorder Of Glycosylation, Type Iij	606976	COG4	Cog4	1	1	PS212066	Congenital disorders of glycosylation, type II	1	1
613507	Glycogen Storage Disease Xv	603942	GYG1	Gyg	1	1			1	1		['slow muscle cell']
613559	Combined Oxidative Phosphorylation Deficiency 7	613541	MTRFR	Mtrfr	1	1	PS609060	Combined oxidative phosphorylation deficiency	0	0		['fast muscle cell', 'slow muscle cell']	['striated muscle cell', 'myelinating Schwann cell']
613561	Myopathy, Lactic Acidosis, And Sideroblastic Anemia 2	610957	YARS2	Yars2	1	1	PS600462	Myopathy, lactic acidosis, and sideroblastic anemia	1	0	Yes
613563	Noonan Syndrome-like Disorder With Or Without Juvenile Myelomonocyticleukemia	165360	CBL	Cbl	1	1			1	1
613608	Epilepsy, Familial Adult Myoclonic, 3	613297	MARCHF6	Marchf6	1	1	PS601068	Epilepsy, familial adult myoclonic	0	0
613640	Neuropathy, Hereditary Sensory And Autonomic, Type Ic	605713	SPTLC2	Sptlc2	1	1	PS162400	Hereditary sensory and autonomic neuropathy	1	1		['capillary endothelial cell']
613641	Charcot-marie-tooth Disease, Recessive Intermediate B	601421	KARS1	Kars	1	1	PS118220	Charcot-Marie-Tooth disease	0	1
613647	Spastic Paraplegia 48, Autosomal Recessive	613653	AP5Z1	Ap5z1	1	1	PS303350	Spastic paraplegia	1	0
613658	Rajab Interstitial Lung Disease With Brain Calcifications	609690	FARSB	Farsb	1	1	PS613658	Rajab interstitial lung disease with brain calcifications	1	1
613661	Congenital Disorder Of Glycosylation, Type Ip	613666	ALG11	Alg11	1	1	PS212065	Congenital disorders of glycosylation, type I	0	0
613662	Mitochondrial Dna Depletion Syndrome 4b (mngie Type)	174763	POLG	Polg	1	1	PS603041	Mitochondrial DNA depletion syndrome	1	1	Yes
613668	Microcephaly, Postnatal Progressive, With Seizures And Brain Atrophy	603810	MED17	Med17	1	1			1	1
613670	Mental Retardation With Language Impairment And With Or Without Autistic Features	605515	FOXP1		1	1			1	0
613672	Spastic Ataxia 4, Autosomal Recessive	613669	MTPAP	Mtpap	1	1	PS108600	Spastic ataxia	1	1		['skeletal muscle satellite stem cell']
613684	Rubinstein-taybi Syndrome 2	602700	EP300	Ep300	1	1	PS180849	Rubinstein-Taybi syndrome	1	1
613706	Noonan Syndrome 7	164757	BRAF	Braf	1	1	PS163950	Noonan syndrome	1	1	Yes	['mast cell']
613707	Leopard Syndrome 3	164757	BRAF	Braf	1	1	PS151100	LEOPARD syndrome	1	1	Yes
613708	Neuropathy, Hereditary Sensory, Type Id	606439	ATL1	Atl1	1	1	PS162400	Hereditary sensory and autonomic neuropathy	1	0		['capillary endothelial cell']
613710	Thiamine Metabolism Dysfunction Syndrome 4 (bilateral Striatal Degenerationand Progressive Polyneuropathy Type)	606521	SLC25A19	Slc25a19	1	1	PS249270	Thiamine-responsive dysfunction syndrome	1	1		['macrophage']
613720	Epileptic Encephalopathy, Early Infantile, 7	602235	KCNQ2	Kcnq2	1	1	PS308350	Developmental and epileptic encephalopathy	0	0
613721	Epileptic Encephalopathy, Early Infantile, 11	182390	SCN2A	Scn2a	1	1	PS308350	Developmental and epileptic encephalopathy	0	0
613722	Epileptic Encephalopathy, Early Infantile, 12	607120	PLCB1	Plcb1	1	1	PS308350	Developmental and epileptic encephalopathy	1	1
613723	Muscular Dystrophy, Limb-girdle, Type 2q	601282	PLEC	Plec	1	1	PS253600	Muscular dystrophy, limb-girdle, autosomal recessive	1	1	Yes
613724	Leukoencephalopathy With Dystonia And Motor Neuropathy	184755	SCP2	Scp2	1	1			1	1
613730	Hemorrhagic Destruction Of The Brain, Subependymal Calcification,and Cataracts	606871	JAM3	Jam3	1	1			1	1
613735	Chromosome 1p32-p31 Deletion Syndrome	600727	NFIA	Nfia	1	1			1	1			['skeletal muscle fibroblast; fibroblast']
613744	Spastic Paraplegia 51, Autosomal Recessive	607244	AP4E1	Ap4e1	1	1	PS303350	Spastic paraplegia	1	0
613795	Loeys-dietz Syndrome, Type 3	603109	SMAD3	Smad3	1	1	PS609192	Loeys-Dietz syndrome	1	1		['endothelial cell of lymphatic vessel']	['tendon cell']
613800	Meier-gorlin Syndrome 2	603056	ORC4	Orc4	1	1	PS224690	Meier-Gorlin syndrome	1	1
613811	Pontocerebellar Hypoplasia, Type 2d	613009	SEPSECS	Sepsecs	1	1	PS607596	Pontocerebellar hypoplasia	0	0
613818	Muscular Dystrophy-dystroglycanopathy (limb-girdle), Type C, 7	128239	DAG1	Dag1	1	1	PS253600	Muscular dystrophy, limb-girdle, autosomal recessive	1	1	Yes
613818	Muscular Dystrophy-dystroglycanopathy (limb-girdle), Type C, 7	128239	DAG1	Dag1	1	1	PS609308	Muscular dystrophy-dystroglycanopathy, type C	1	1	Yes
613839	Megaloblastic Anemia Due To Dihydrofolate Reductase Deficiency	126060	DHFR	Dhfr	1	1			0	0
613845	Hyperuricemia, Pulmonary Hypertension, Renal Failure, And Alkalosis	612804	SARS2	Sars2	1	1			0	0
613848	Osteogenesis Imperfecta, Type X	600943	SERPINH1	Serpinh1	1	1	PS166200	Osteogenesis imperfecta	1	1		['pericyte cell']	['tendon cell']
613861	Retinitis Pigmentosa 59	608172	DHDDS	Dhdds	1	1	PS212065	Congenital disorders of glycosylation, type I	1	1
613861	Retinitis Pigmentosa 59	608172	DHDDS	Dhdds	1	1	PS268000	Retinitis pigmentosa	1	1
613869	Myopathy, Myofibrillar, Fatal Infantile Hypertonic, Alpha-b Crystallin-related	123590	CRYAB	Cryab	1	1	PS601419	Myopathy, myofibrillar	1	1	Yes	['fast muscle cell', 'slow muscle cell']	['striated muscle cell']
613870	Hirschsprung Disease, Cardiac Defects, And Autonomic Dysfunction	600423	ECE1	Ece1	1	1			1	1
613877	Lipodystrophy, Familial Partial, Type 4	170290	PLIN1	Plin1	1	1	PS151660	Lipodystrophy, familial partial	0	0		['capillary endothelial cell']	['capillary endothelial cell', 'blood vessel endothelial cell']
613882	Hypomagnesemia 6, Renal	607803	CNNM2	Cnnm2	1	1	PS602014	Hypomagnesemia	1	1
613908	Spinocerebellar Ataxia 35	613900	TGM6	Tgm6	1	1	PS164400	Spinocerebellar ataxia	0	0			['smooth muscle cell']
613925	Megalencephalic Leukoencephalopathy With Subcortical Cysts 2a	611642	HEPACAM	Hepacam	1	1	PS604004	Leukoencephalopathy, megalencephalic	0	0
613926	Megalencephalic Leukoencephalopathy With Subcortical Cysts 2b, Remitting,with Or Without Mental Retardation	611642	HEPACAM	Hepacam	1	1	PS604004	Leukoencephalopathy, megalencephalic	0	0
613954	Amyotrophic Lateral Sclerosis 14, With Or Without Frontotemporal Dementia	601023	VCP	Vcp	1	1	PS105400	Amyotrophic lateral sclerosis	1	1	Yes
613954	Amyotrophic Lateral Sclerosis 14, With Or Without Frontotemporal Dementia	601023	VCP	Vcp	1	1	PS105550	Frontotemporal dementia and/or Amyotrophic Lateral Sclerosis	1	1	Yes	['mast cell']
613970	Mental Retardation, Autosomal Dominant 6	138252	GRIN2B	Grin2b	1	1	PS156200	Mental retardation, autosomal dominant	0	0
614008	Nestor-guillermo Progeria Syndrome	603811	BANF1	Banf1	1	1	PS176670	Progeria	1	1
614018	Epilepsy, Progressive Myoclonic 6	604027	GOSR2	Gosr2	1	1	PS254800	Epilepsy, progressive myoclonic	1	1			['skeletal muscle fibroblast; fibroblast.1']
614019	Lissencephaly 4	609449	NDE1	Nde1	1	1	PS607432	Lissencephaly	1	1			['stromal cell', 'myelinating Schwann cell']
614023	Phosphoserine Phosphatase Deficiency	172480	PSPH	Psph	1	1			0	1
614039	Cortical Dysplasia, Complex, With Other Brain Malformations	602661	TUBB3	Tubb3	1	1	PS614039	Cortical dysplasia, complex, with other brain malformations	0	0
614052	Mitochondrial Complex V (atp Synthase) Deficiency, Nuclear Type 2	612418	TMEM70	Tmem70	1	1	PS604273	Mitochondrial complex V (ATP synthase) deficiency, nuclear type	1	1		['fast muscle cell', 'slow muscle cell']	['striated muscle cell']
614063	N-acetylaspartate Deficiency	610647	NAT8L	Nat8l	1	1			0	0
614065	Myopathy, Distal, 4	102565	FLNC	Flnc	1	1			1	1			['skeletal muscle satellite cell']
614066	Spastic Paraplegia 47, Autosomal Recessive	607245	AP4B1	Ap4b1	1	1	PS303350	Spastic paraplegia	0	1
614067	Spastic Paraplegia 52, Autosomal Recessive	607243	AP4S1	Ap4s1	1	1	PS303350	Spastic paraplegia	1	1
614080	Multiple Congenital Anomalies-hypotonia-seizures Syndrome 1	606097	PIGN	Pign	1	1	PS614080	Multiple congenital anomalies-hypotonia-seizures syndrome	1	0	Yes
614096	Combined Oxidative Phosphorylation Deficiency 8	612035	AARS2	Aars2	1	1	PS609060	Combined oxidative phosphorylation deficiency	0	0		['fast muscle cell', 'slow muscle cell']	['striated muscle cell', 'myelinating Schwann cell']
614098	Keppen-lubinsky Syndrome	600877	KCNJ6	Kcnj6	1	1			0	0
614104	Mental Retardation, Autosomal Dominant 7	600855	DYRK1A	Dyrk1a	1	1	PS156200	Mental retardation, autosomal dominant	1	1
614105	Methylmalonate Semialdehyde Dehydrogenase Deficiency	603178	ALDH6A1	Aldh6a1	1	1			1	1
614111	Pyruvate Dehydrogenase E1-beta Deficiency	179060	PDHB	Pdhb	1	1	PS312170	Pyruvate dehydrogenase complex deficiency	1	1		['fast muscle cell', 'slow muscle cell']	['striated muscle cell']
614114	Mosaic Variegated Aneuploidy Syndrome 2	607951	CEP57	Cep57	1	1	PS257300	Mosaic variegated aneuploidy syndrome	1	1
614153	Spinocerebellar Ataxia 36	614154	NOP56	Nop56	1	1	PS164400	Spinocerebellar ataxia	1	1			['smooth muscle cell']
614160	Muscle Hypertrophy	601788	MSTN	Mstn	1	1			0	1
614198	Myasthenic Syndrome, Congenital, 16	603967	SCN4A	Scn4a	1	1	PS601462	Myasthenic syndrome, congenital	1	0	Yes
614207	Hyperphosphatasia With Mental Retardation Syndrome 3	615187	PGAP2		1	1	PS239300	Hyperphosphatasia with mental retardation syndrome	1	0
614219	Adams-oliver Syndrome 2	614194	DOCK6	Dock6	1	1	PS100300	Adams-Oliver syndrome	1	1		['capillary endothelial cell']
614222	Warburg Micro Syndrome 3	602207	RAB18	Rab18	1	1	PS600118	Warburg micro syndrome	1	1
614225	Warburg Micro Syndrome 2	609275	RAB3GAP2	Rab3gap2	1	1	PS600118	Warburg micro syndrome	1	1
614228	Charcot-marie-tooth Disease, Axonal, Type 2o	600112	DYNC1H1	Dync1h1	1	1	PS118220	Charcot-Marie-Tooth disease	1	1
614231	Microcephaly, Epilepsy, And Diabetes Syndrome	609382	IER3IP1	Ier3ip1	1	1			1	1
614254	Neurodevelopmental Disorder With Or Without Hyperkinetic Movements And Seizures, Autosomal Dominant	138249	GRIN1	Grin1	1	1			0	0
614255	Mental Retardation, Autosomal Dominant 9	601255	KIF1A	Kif1a	1	1			0	0
614261	Microcephaly-capillary Malformation Syndrome	606247	STAMBP	Stambp	1	1			1	1
614262	Arthrogryposis, Perthes Disease, And Upward Gaze Palsy	609798	NEK9	Nek9	1	1			1	1
614298	Neurodegeneration With Brain Iron Accumulation 4	614297	C19orf12	1600014C10Rik	1	1	PS234200	Neurodegeneration with brain iron accumulation	1	0
614299	Multiple Mitochondrial Dysfunctions Syndrome 2 With Hyperglycinemia	613183	BOLA3	Bola3	1	1	PS605711	Multiple mitochondrial dysfunctions syndrome	1	1		['fast muscle cell', 'slow muscle cell']	['striated muscle cell', 'pericyte cell']
614300	Hypermethioninemia Due To Adenosine Kinase Deficiency	102750	ADK	Adk	1	1			1	1
614302	Emery-dreifuss Muscular Dystrophy 7, Autosomal Dominant	612048	TMEM43	Tmem43	1	1	PS310300	Emery-Dreifuss muscular dystrophy	1	1	Yes
614305	Sclerosteosis 2	604270	LRP4	Lrp4	1	1	PS269500	Sclerosteosis	1	1		['skeletal muscle satellite stem cell']
614306	Cognitive Impairment With Or Without Cerebellar Ataxia	600702	SCN8A	Scn8a	1	1			0	0
614307	Alpha-methylacyl-coa Racemase Deficiency	604489	AMACR	Amacr	1	1			0	0
614321	Myopathy, Distal, Tateyama Type	601253	CAV3	Cav3	1	1			1	1		['fast muscle cell']
614322	Spinocerebellar Ataxia, Autosomal Recessive 12	605131	WWOX	Wwox	1	1	PS213200	Spinocerebellar ataxia, autosomal recessive	1	0			['capillary endothelial cell', 'myelinating Schwann cell']
614325	Pitt-hopkins-like Syndrome 2	600565	NRXN1	Nrxn1	1	1			0	1
614335	Arthrogryposis, Distal, Type 1b	160794	MYBPC1	Mybpc1	1	1	PS108120	Arthrogryposis, distal	1	1		['fast muscle cell']	['striated muscle cell']
614340	Mental Retardation, Autosomal Recessive 27	610350	LINS1	Lins1	1	1	PS249500	Mental retardation, autosomal recessive	1	0
614369	Peripheral Neuropathy, Myopathy, Hoarseness, And Hearing Loss	608568	MYH14	Myh14	1	1			1	0		['skeletal muscle satellite stem cell']
614373	Amyotrophic Lateral Sclerosis 16, Juvenile	601978	SIGMAR1	Sigmar1	1	1	PS105400	Amyotrophic lateral sclerosis	1	1
614381	Leukodystrophy, Hypomyelinating, 8, With Or Without Oligodontia And/orhypogonadotropic Hypogonadism	614366	POLR3B	Polr3b	1	1	PS312080	Leukodystrophy, hypomyelinating	0	0
614388	Encephalopathy, Lethal, Due To Defective Mitochondrial And Peroxisomalfission	603850	DNM1L	Dnm1l	1	1	PS614388	Encephalopathy due to defective mitochondrial and peroxisomal fission	1	1
614399	Myopathy, Areflexia, Respiratory Distress, And Dysphagia, Early-onset	612453	MEGF10	Megf10	1	1			1	1		['skeletal muscle satellite stem cell']	['skeletal muscle satellite cell']
614409	Spastic Paraplegia 46, Autosomal Recessive	609471	GBA2	Gba2	1	1	PS303350	Spastic paraplegia	1	0
614424	Joubert Syndrome 14	614423	TMEM237	Tmem237	1	1	PS213300	Joubert syndrome	1	0			['smooth muscle cell']
614436	Charcot-marie-tooth Disease, Axonal, Type 2p	610933	LRSAM1	Lrsam1	1	1	PS118220	Charcot-Marie-Tooth disease	0	0
614437	Cutis Laxa, Autosomal Recessive, Type Ib	604633	EFEMP2	Efemp2	1	1	PS123700	Cutis laxa	1	1
614438	Cutis Laxa, Autosomal Recessive, Type Iiib	179035	PYCR1	Pycr1	1	1	PS123700	Cutis laxa	0	0
614450	Hypothyroidism, Congenital, Nongoitrous, 6	190120	THRA	Thra	1	1	PS275200	Hypothyroidism, congenital, nongoitrous	1	1
614455	Charcot-marie-tooth Disease, Dominant Intermediate E	610982	INF2	Inf2	1	1	PS118220	Charcot-Marie-Tooth disease	1	1
614457	Ichthyosis, Spastic Quadriplegia, And Mental Retardation	605512	ELOVL4	Elovl4	1	1			0	0
614458	Thiamine Metabolism Dysfunction Syndrome 5 (episodic Encephalopathy Type)	606370	TPK1	Tpk1	1	1	PS249270	Thiamine-responsive dysfunction syndrome	1	0		['macrophage']
614462	Hyperglycinemia, Lactic Acidosis, And Seizures	607031	LIAS	Lias	1	1	PS312170	Pyruvate dehydrogenase complex deficiency	1	1		['fast muscle cell', 'slow muscle cell']	['striated muscle cell']
614464	Joubert Syndrome 15	610523	CEP41	Cep41	1	1	PS213300	Joubert syndrome	1	0			['smooth muscle cell']
614482	Congenital Cataracts, Hearing Loss, And Neurodegeneration	603690	SLC33A1	Slc33a1	1	1			1	0
614483	Porencephaly 2	120090	COL4A2	Col4a2	1	1	PS175780	Brain small vessel disease	1	1		['mesenchymal stem cell']	['blood vessel endothelial cell', 'skeletal muscle fibroblast; fibroblast']
614487	Spastic Ataxia 5, Autosomal Recessive	604581	AFG3L2	Afg3l2	1	1	PS108600	Spastic ataxia	1	1		['skeletal muscle satellite stem cell']
614498	Rigidity And Multifocal Seizure Syndrome, Lethal Neonatal	614506	BRAT1	Brat1	1	1			1	0
614501	Psychomotor Retardation, Epilepsy, And Craniofacial Dysmorphism	608241	SNIP1	Snip1	1	1			1	0
614507	Congenital Disorder Of Glycosylation, Type Ir	602202	DDOST	Ddost	1	1	PS212065	Congenital disorders of glycosylation, type I	1	1
614557	Ehlers-danlos Syndrome With Progressive Kyphoscoliosis, Myopathy,and Hearing Loss	614505	FKBP14	Fkbp14	1	1	PS130000	Ehlers-Danlos syndrome	1	1	Yes	['mesenchymal stem cell', 'tendon cell']	['tendon cell', 'stromal cell']
614558	Epileptic Encephalopathy, Early Infantile, 13	600702	SCN8A	Scn8a	1	1	PS308350	Developmental and epileptic encephalopathy	0	0
614559	Infantile Cerebellar-retinal Degeneration	100850	ACO2	Aco2	1	1			1	1
614561	Leukoencephalopathy, Brain Calcifications, And Cysts	616663	SNORD118		1	1			0	0
614563	Mental Retardation, Autosomal Dominant 13	600112	DYNC1H1	Dync1h1	1	1	PS156200	Mental retardation, autosomal dominant	1	1
614576	Congenital Disorder Of Glycosylation, Type Iil	606977	COG6	Cog6	1	1	PS212066	Congenital disorders of glycosylation, type II	1	0
614594	Palmoplantar Keratoderma, Mutilating, With Periorificial Keratoticplaques	607066	TRPV3	Trpv3	1	1	PS614594	Olmsted syndrome	0	0
614607	Coffin-siris Syndrome 2	603024	ARID1A	Arid1a	1	1	PS135900	Coffin-Siris syndrome	1	1		['t cell']	['myelinating Schwann cell']
614607	Coffin-siris Syndrome 2	603024	ARID1A	Arid1a	1	1	PS156200	Mental retardation, autosomal dominant	1	1
614608	Coffin-siris Syndrome 3	601607	SMARCB1	Smarcb1	1	1	PS135900	Coffin-Siris syndrome	1	1		['t cell']	['myelinating Schwann cell']
614608	Coffin-siris Syndrome 3	601607	SMARCB1	Smarcb1	1	1	PS156200	Mental retardation, autosomal dominant	1	1
614609	Coffin-siris Syndrome 4	603254	SMARCA4	Smarca4	1	1	PS135900	Coffin-Siris syndrome	1	1		['t cell']	['myelinating Schwann cell']
614609	Coffin-siris Syndrome 4	603254	SMARCA4	Smarca4	1	1	PS156200	Mental retardation, autosomal dominant	1	1
614618	Hyperekplexia 3	604159	SLC6A5	Slc6a5	1	1	PS149400	Hyperekplexia	0	0
614619	Hyperekplexia 2	138492	GLRB	Glrb	1	1	PS149400	Hyperekplexia	1	0
614643	Muscular Dystrophy-dystroglycanopathy (congenital With Brain And Eyeanomalies), Type A, 7	614631	CRPPA	Crppa	1	1	PS236670	Muscular dystrophy-dystroglycanopathy, type A	0	0
614652	Coenzyme Q10 Deficiency, Primary, 3	610564	PDSS2	Pdss2	1	1	PS607426	Coenzyme Q10 deficiency, primary	1	0	Yes	['fast muscle cell', 'slow muscle cell']	['striated muscle cell']
614653	Neuropathy, Hereditary Sensory And Autonomic, Type Vi	113810	DST		1	1	PS162400	Hereditary sensory and autonomic neuropathy	1	0		['capillary endothelial cell']
614654	Coenzyme Q10 Deficiency, Primary, 5	612837	COQ9	Coq9	1	1	PS607426	Coenzyme Q10 deficiency, primary	1	1	Yes	['fast muscle cell', 'slow muscle cell']	['striated muscle cell']
614678	Pontocerebellar Hypoplasia, Type 1b	606489	EXOSC3	Exosc3	1	1	PS607596	Pontocerebellar hypoplasia	1	1
614702	Combined Oxidative Phosphorylation Deficiency 10	614667	MTO1	Mto1	1	1	PS609060	Combined oxidative phosphorylation deficiency	1	1		['fast muscle cell', 'slow muscle cell']	['striated muscle cell', 'myelinating Schwann cell']
614707	Brown-vialetto-van Laere Syndrome 2	607882	SLC52A2	Slc52a2	1	1	PS211530	Brown-Vialetto-Van Laere syndrome	1	0
614727	Congenital Disorder Of Glycosylation, Type Iik	614726	TMEM165	Tmem165	1	1	PS212066	Congenital disorders of glycosylation, type II	1	1
614739	3-@methylglutaconic Aciduria With Deafness, Encephalopathy, And Leigh-likesyndrome	614725	SERAC1	Serac1	1	1	PS250950	3-Methylglutaconic aciduria	0	0
614741	Mitochondrial Pyruvate Carrier Deficiency	614738	MPC1	Mpc1	1	1			1	0
614744	Facial Paresis, Hereditary Congenital, 3	142968	HOXB1	Hoxb1	1	1	PS601471	Facial paresis, hereditary congenital	0	0
614749	Hyperphosphatasia With Mental Retardation Syndrome 2	614730	PIGO	Pigo	1	1	PS239300	Hyperphosphatasia with mental retardation syndrome	0	0
614750	Myasthenic Syndrome, Congenital, 13, With Tubular Aggregates	191350	DPAGT1	Dpagt1	1	1	PS601462	Myasthenic syndrome, congenital	1	1	Yes
614750	Myasthenic Syndrome, Congenital, 13, With Tubular Aggregates	191350	DPAGT1	Dpagt1	1	1	PS610542	Myasthenic syndrome, congenital, with tubular aggregates	1	1	Yes
614751	Neuronopathy, Distal Hereditary Motor, Type Vb	609139	REEP1	Reep1	1	1			1	1
614753	Sotos Syndrome 2	164005	NFIX	Nfix	1	1	PS117550	Sotos syndrome	1	1
614756	Cerebellar Ataxia, Nonprogressive, With Mental Retardation	611501	CAMTA1	Camta1	1	1			1	1
614807	Myopathy, Centronuclear, 4	614666	CCDC78	Ccdc78	1	1	PS160150	Myopathy, centronuclear	0	0		['fast muscle cell', 'slow muscle cell']
614808	Amyotrophic Lateral Sclerosis 18	176610	PFN1	Pfn1	1	1	PS105400	Amyotrophic lateral sclerosis	1	1
614813	Short Stature, Onychodysplasia, Facial Dysmorphism, And Hypotrichosis	614783	POC1A	Poc1a	1	1			0	1
614815	Joubert Syndrome 18	613847	TCTN3	Tctn3	1	1	PS213300	Joubert syndrome	1	0			['smooth muscle cell']
614816	Loeys-dietz Syndrome, Type 4	190220	TGFB2	Tgfb2	1	1	PS609192	Loeys-Dietz syndrome	1	1		['endothelial cell of lymphatic vessel']	['tendon cell']
614830	Muscular Dystrophy-dystroglycanopathy (congenital With Brain And Eyeanomalies), Type A, 8	614828	POMGNT2	Pomgnt2	1	1	PS236670	Muscular dystrophy-dystroglycanopathy, type A	0	0
614831	Spinocerebellar Ataxia, Autosomal Recessive 13	604473	GRM1	Grm1	1	1	PS213200	Spinocerebellar ataxia, autosomal recessive	0	0			['capillary endothelial cell', 'myelinating Schwann cell']
614833	Microcephaly, Short Stature, And Polymicrogyria With Or Without Seizures	610436	RTTN	Rttn	1	1			0	0
614856	Osteogenesis Imperfecta, Type Xiii	112264	BMP1	Bmp1	1	1	PS166200	Osteogenesis imperfecta	1	1		['pericyte cell']	['tendon cell']
614857	Methylmalonic Aciduria And Homocystinuria, Cblj Type	603214	ABCD4	Abcd4	1	1			1	1		['endothelial cell of vascular tree']
614859	Peroxisome Biogenesis Disorder 3a (zellweger)	601758	PEX12	Pex12	1	1	PS214100	Peroxisome biogenesis disorder	0	0			['smooth muscle cell']
614862	Peroxisome Biogenesis Disorder 4a (zellweger)	601498	PEX6	Pex6	1	1	PS214100	Peroxisome biogenesis disorder	1	1			['smooth muscle cell']
614863	Peroxisome Biogenesis Disorder 4b	601498	PEX6	Pex6	1	1	PS214100	Peroxisome biogenesis disorder	1	1			['smooth muscle cell']
614866	Peroxisome Biogenesis Disorder 5a (zellweger)	170993	PEX2	Pex2	1	1	PS214100	Peroxisome biogenesis disorder	1	0			['smooth muscle cell']
614867	Peroxisome Biogenesis Disorder 5b	170993	PEX2	Pex2	1	1	PS214100	Peroxisome biogenesis disorder	1	0			['smooth muscle cell']
614870	Peroxisome Biogenesis Disorder 6a (zellweger)	602859	PEX10	Pex10	1	1	PS214100	Peroxisome biogenesis disorder	0	0			['smooth muscle cell']
614871	Peroxisome Biogenesis Disorder 6b	602859	PEX10	Pex10	1	1	PS214100	Peroxisome biogenesis disorder	0	0			['smooth muscle cell']
614872	Peroxisome Biogenesis Disorder 7a (zellweger)	608666	PEX26	Pex26	1	1	PS214100	Peroxisome biogenesis disorder	1	1			['smooth muscle cell']
614873	Peroxisome Biogenesis Disorder 7b	608666	PEX26	Pex26	1	1	PS214100	Peroxisome biogenesis disorder	1	1			['smooth muscle cell']
614876	Peroxisome Biogenesis Disorder 8a (zellweger)	603360	PEX16	Pex16	1	1	PS214100	Peroxisome biogenesis disorder	1	1			['smooth muscle cell']
614877	Peroxisome Biogenesis Disorder 8b	603360	PEX16	Pex16	1	1	PS214100	Peroxisome biogenesis disorder	1	1			['smooth muscle cell']
614879	Peroxisome Biogenesis Disorder 9b	601757	PEX7	Pex7	1	1	PS214100	Peroxisome biogenesis disorder	0	1			['smooth muscle cell']
614881	Spinal Muscular Atrophy, Distal, Autosomal Recessive, 5	604139	DNAJB2	Dnajb2	1	1			1	1
614882	Peroxisome Biogenesis Disorder 10a (zellweger)	603164	PEX3	Pex3	1	1	PS214100	Peroxisome biogenesis disorder	1	1			['smooth muscle cell']
614883	Peroxisome Biogenesis Disorder 11a (zellweger)	601789	PEX13	Pex13	1	1	PS214100	Peroxisome biogenesis disorder	1	1			['smooth muscle cell']
614885	Peroxisome Biogenesis Disorder 11b	601789	PEX13	Pex13	1	1	PS214100	Peroxisome biogenesis disorder	1	1			['smooth muscle cell']
614886	Peroxisome Biogenesis Disorder 12a (zellweger)	600279	PEX19	Pex19	1	1	PS214100	Peroxisome biogenesis disorder	1	1			['smooth muscle cell']
614887	Peroxisome Biogenesis Disorder 13a (zellweger)	601791	PEX14	Pex14	1	1	PS214100	Peroxisome biogenesis disorder	0	1			['smooth muscle cell']
614895	Charcot-marie-tooth Disease, Demyelinating, Type 4f	605725	PRX	Prx	1	1	PS118220	Charcot-Marie-Tooth disease	1	1
614898	Spastic Paraplegia 53, Autosomal Recessive	609927	VPS37A	Vps37a	1	1	PS303350	Spastic paraplegia	1	1
614915	Lethal Congenital Contracture Syndrome 4	160794	MYBPC1	Mybpc1	1	1	PS253310	Lethal congenital contracture syndrome	1	1
614920	Peroxisome Biogenesis Disorder 14b	603867	PEX11B	Pex11b	1	1	PS214100	Peroxisome biogenesis disorder	0	1			['smooth muscle cell']
614921	Congenital Disorder Of Glycosylation, Type It	171900	PGM1	Pgm1	1	1	PS212065	Congenital disorders of glycosylation, type I	1	1
614922	Combined Oxidative Phosphorylation Deficiency 11	614917	RMND1	Rmnd1	1	1	PS609060	Combined oxidative phosphorylation deficiency	1	0		['fast muscle cell', 'slow muscle cell']	['striated muscle cell', 'myelinating Schwann cell']
614924	Combined Oxidative Phosphorylation Deficiency 12	612799	EARS2	Ears2	1	1	PS609060	Combined oxidative phosphorylation deficiency	0	0		['fast muscle cell', 'slow muscle cell']	['striated muscle cell', 'myelinating Schwann cell']
614932	Combined Oxidative Phosphorylation Deficiency 13	610316	PNPT1	Pnpt1	1	1	PS609060	Combined oxidative phosphorylation deficiency	1	0		['fast muscle cell', 'slow muscle cell']	['striated muscle cell', 'myelinating Schwann cell']
614937	Myoclonus, Familial Cortical	605235	NOL3	Nol3	1	1	PS614937	Myoclonus, Familial	0	0
614946	Combined Oxidative Phosphorylation Deficiency 14	611592	FARS2	Fars2	1	1	PS609060	Combined oxidative phosphorylation deficiency	1	1		['fast muscle cell', 'slow muscle cell']	['striated muscle cell', 'myelinating Schwann cell']
614947	Combined Oxidative Phosphorylation Deficiency 15	611766	MTFMT	Mtfmt	1	1	PS609060	Combined oxidative phosphorylation deficiency	0	0		['fast muscle cell', 'slow muscle cell']	['striated muscle cell', 'myelinating Schwann cell']
614959	Epileptic Encephalopathy, Early Infantile, 14	608167	KCNT1	Kcnt1	1	1	PS308350	Developmental and epileptic encephalopathy	0	0
614961	Pontocerebellar Hypoplasia, Type 8	164010	CHMP1A	Chmp1a	1	1	PS607596	Pontocerebellar hypoplasia	1	1
614969	Pontocerebellar Hypoplasia, Type 7	613931	TOE1	Toe1	1	1	PS607596	Pontocerebellar hypoplasia	1	0
614976	Carpenter Syndrome 2	604267	MEGF8	Megf8	1	1	PS201000	Carpenter syndrome	0	0
615006	Epileptic Encephalopathy, Early Infantile, 15	606494	ST3GAL3	St3gal3	1	1	PS308350	Developmental and epileptic encephalopathy	1	1
615009	Schuurs-hoeijmakers Syndrome	607492	PACS1	Pacs1	1	1	PS156200	Mental retardation, autosomal dominant	1	1
615025	Charcot-marie-tooth Disease, Axonal, Type 2q	614984	DHTKD1	Dhtkd1	1	1	PS118220	Charcot-Marie-Tooth disease	1	0
615030	Spastic Paraplegia 56, Autosomal Recessive	610670	CYP2U1	Cyp2u1	1	1	PS303350	Spastic paraplegia	1	0
615031	Spastic Paraplegia 49, Autosomal Recessive	615000	TECPR2	Tecpr2	1	1	PS303350	Spastic paraplegia	1	0
615033	Spastic Paraplegia 54, Autosomal Recessive	615003	DDHD2	Ddhd2	1	1	PS303350	Spastic paraplegia	1	1
615034	Dystonia 24	610110	ANO3	Ano3	1	1	PS128100	Dystonia	0	0
615035	Spastic Paraplegia 55, Autosomal Recessive	613541	MTRFR	Mtrfr	1	1	PS303350	Spastic paraplegia	0	0
615041	Muscular Dystrophy-dystroglycanopathy (congenital With Brain And Eyeanomalies), Type A, 10	605862	RXYLT1	Rxylt1	1	1	PS236670	Muscular dystrophy-dystroglycanopathy, type A	1	0
615042	Congenital Disorder Of Glycosylation, Type Iu	603564	DPM2	Dpm2	1	1	PS212065	Congenital disorders of glycosylation, type I	1	1
615043	Spastic Paraplegia 43, Autosomal Recessive	614297	C19orf12	1600014C10Rik	1	1	PS303350	Spastic paraplegia	1	0
615048	Spinal Muscular Atrophy, Jokela Type	615903	CHCHD10	Chchd10	1	1			1	1		['slow muscle cell']
615065	Arthrogryposis, Distal, Type 5d	605896	ECEL1	Ecel1	1	1	PS108120	Arthrogryposis, distal	0	0		['fast muscle cell']	['striated muscle cell']
615073	Dystonia 25	139312	GNAL	Gnal	1	1	PS128100	Dystonia	1	0
615074	Mental Retardation, Autosomal Dominant 18	614998	GATAD2B	Gatad2b	1	1	PS156200	Mental retardation, autosomal dominant	1	1
615075	Mental Retardation, Autosomal Dominant 19	116806	CTNNB1	Ctnnb1	1	1	PS156200	Mental retardation, autosomal dominant	1	1
615084	Mitochondrial Dna Depletion Syndrome 11	615076	MGME1	Mgme1	1	1	PS603041	Mitochondrial DNA depletion syndrome	1	0	Yes
615085	Osteopetrosis, Autosomal Recessive 8	614780	SNX10	Snx10	1	1	PS259700	Osteopetrosis, autosomal recessive	1	1		['macrophage']
615095	Microcephaly 10, Primary, Autosomal Recessive	610827	ZNF335	Zfp335	1	1	PS251200	Microcephaly, primary autosomal recessive	1	0		['t cell']
615119	Cardioencephalomyopathy, Fatal Infantile, Due To Cytochrome C Oxidase Deficiency 2	603646	COX15	Cox15	1	1	PS220110	Mitochondrial complex IV deficiency, nuclear-type	1	0		['fast muscle cell', 'slow muscle cell']	['striated muscle cell']
615120	Myasthenic Syndrome, Congenital, 8	103320	AGRN	Agrn	1	1	PS601462	Myasthenic syndrome, congenital	1	1	Yes
615156	Progressive External Ophthalmoplegia With Mitochondrial Dna Deletions,autosomal Dominant, 6	601810	DNA2	Dna2	1	1	PS157640	Progressive external ophthalmoplegia with mtDNA deletions	0	0
615157	Mitochondrial Complex Iii Deficiency, Nuclear Type 2	613814	TTC19	Ttc19	1	1	PS124000	Mitochondrial complex III deficiency, nuclear type	1	0		['fast muscle cell', 'slow muscle cell']	['striated muscle cell']
615159	Mitochondrial Complex Iii Deficiency, Nuclear Type 4	612080	UQCRQ	Uqcrq	1	1	PS124000	Mitochondrial complex III deficiency, nuclear type	1	1		['fast muscle cell', 'slow muscle cell']	['striated muscle cell']
615181	Muscular Dystrophy-dystroglycanopathy (congenital With Brain And Eyeanomalies), Type A, 11	610194	B3GALNT2	B3galnt2	1	1	PS236670	Muscular dystrophy-dystroglycanopathy, type A	1	1
615182	Combined D-2- And L-2-hydroxyglutaric Aciduria	190315	SLC25A1		1	1			1	0
615191	Lissencephaly 5	150240	LAMB1	Lamb1	1	1	PS607432	Lissencephaly	1	1			['stromal cell', 'myelinating Schwann cell']
615217	Ataxia-oculomotor Apraxia 3	611317	PIK3R5	Pik3r5	1	1			1	1
615249	Muscular Dystrophy-dystroglycanopathy (congenital With Brain And Eyeanomalies), Type A, 12	615247	POMK	Pomk	1	1	PS236670	Muscular dystrophy-dystroglycanopathy, type A	0	0
615273	Congenital Disorder Of Deglycosylation	610661	NGLY1	Ngly1	1	1			1	1
615281	Hypomyelination With Brainstem And Spinal Cord Involvement And Legspasticity	603084	DARS1	Dars	1	1			0	1
615282	Cortical Dysplasia, Complex, With Other Brain Malformations 2	604593	KIF5C	Kif5c	1	1	PS614039	Cortical dysplasia, complex, with other brain malformations	1	0
615284	Charcot-marie-tooth Disease, Type 4b3	603560	SBF1	Sbf1	1	1	PS118220	Charcot-Marie-Tooth disease	1	1
615286	Mental Retardation, Autosomal Recessive 36	615302	ADAT3	Adat3	1	1	PS249500	Mental retardation, autosomal recessive	0	0
615287	Muscular Dystrophy-dystroglycanopathy (congenital With Brain And Eye Anomalies), Type A, 13	605517	B4GAT1	B4gat1	1	1	PS236670	Muscular dystrophy-dystroglycanopathy, type A	1	0
615290	Spinal Muscular Atrophy, Lower Extremity-predominant, 2, Autosomaldominant	609797	BICD2	Bicd2	1	1	PS158600	Spinal muscular atrophy, lower extremity-predominant	1	1
615330	Multiple Mitochondrial Dysfunctions Syndrome 3	615316	IBA57	Iba57	1	1	PS605711	Multiple mitochondrial dysfunctions syndrome	1	0		['fast muscle cell', 'slow muscle cell']	['striated muscle cell', 'pericyte cell']
615338	Epileptic Encephalopathy, Early Infantile, 16	613577	TBC1D24	Tbc1d24	1	1	PS308350	Developmental and epileptic encephalopathy	0	0
615348	Nemaline Myopathy 8	615340	KLHL40	Klhl40	1	1	PS161800	Nemaline myopathy	1	0	Yes	['fast muscle cell', 'slow muscle cell']	['striated muscle cell']
615349	Ehlers-danlos Syndrome, Progeroid Type, 2	615291	B3GALT6	B3galt6	1	1	PS130000	Ehlers-Danlos syndrome	1	1		['mesenchymal stem cell', 'tendon cell']	['tendon cell', 'stromal cell']
615350	Muscular Dystrophy-dystroglycanopathy (congenital With Brain And Eyeanomalies), Type A, 14	615320	GMPPB	Gmppb	1	1	PS236670	Muscular dystrophy-dystroglycanopathy, type A	1	1
615351	Muscular Dystrophy-dystroglycanopathy (congenital With Mental Retardation),type B, 14	615320	GMPPB	Gmppb	1	1	PS613155	Muscular dystrophy-dystroglycanopathy, type B	1	1		['smooth muscle cell']
615352	Muscular Dystrophy-dystroglycanopathy (limb-girdle), Type C, 14	615320	GMPPB	Gmppb	1	1	PS253600	Muscular dystrophy, limb-girdle, autosomal recessive	1	1	Yes
615352	Muscular Dystrophy-dystroglycanopathy (limb-girdle), Type C, 14	615320	GMPPB	Gmppb	1	1	PS609308	Muscular dystrophy-dystroglycanopathy, type C	1	1	Yes
615356	Muscular Dystrophy, Limb-girdle, Type 2s	614138	TRAPPC11	Trappc11	1	1	PS253600	Muscular dystrophy, limb-girdle, autosomal recessive	1	0	Yes
615361	Hypocalcemia, Autosomal Dominant 2	139313	GNA11	Gna11	1	1	PS601198	Hypocalcemia	1	1
615368	Lethal Congenital Contracture Syndrome 5	602378	DNM2	Dnm2	1	1	PS253310	Lethal congenital contracture syndrome	1	1
615376	Charcot-marie-tooth Disease, Recessive Intermediate C	611101	PLEKHG5	Plekhg5	1	1	PS118220	Charcot-Marie-Tooth disease	0	1
615381	Mandibular Hypoplasia, Deafness, Progeroid Features, And Lipodystrophysyndrome	174761	POLD1	Pold1	1	1			0	1			['B cell']
615386	Spinocerebellar Ataxia, Autosomal Recessive 14	604985	SPTBN2	Sptbn2	1	1	PS213200	Spinocerebellar ataxia, autosomal recessive	0	0			['capillary endothelial cell', 'myelinating Schwann cell']
615398	Multiple Congenital Anomalies-hypotonia-seizures Syndrome 3	610272	PIGT	Pigt	1	1	PS614080	Multiple congenital anomalies-hypotonia-seizures syndrome	1	1	Yes
615411	Cortical Dysplasia, Complex, With Other Brain Malformations 3	602591	KIF2A	Kif2a	1	1	PS614039	Cortical dysplasia, complex, with other brain malformations	1	1
615412	Cortical Dysplasia, Complex, With Other Brain Malformations 4	191135	TUBG1	Tubg1	1	1	PS614039	Cortical dysplasia, complex, with other brain malformations	1	1
615418	Mitochondrial Dna Depletion Syndrome 12 (cardiomyopathic Type)	103220	SLC25A4	Slc25a4	1	1	PS603041	Mitochondrial DNA depletion syndrome	1	1	Yes
615419	Hypotonia, Infantile, With Psychomotor Retardation And Characteristicfacies	611549	NALCN	Nalcn	1	1	PS615419	Hypotonia, infantile, with psychomotor retardation and characteristic facies	0	0	Yes		['myelinating Schwann cell']
615422	Inclusion Body Myopathy With Early-onset Paget Disease With Or Without Frontotemporal Dementia 2	600124	HNRNPA2B1	Hnrnpa2b1	1	1	PS167320	Inclusion body myopathy/Paget disease/frontotemporal dementia	1	1
615424	Inclusion Body Myopathy With Early-onset Paget Disease With Or Without Frontotemporal Dementia 3	164017	HNRNPA1		1	1	PS167320	Inclusion body myopathy/Paget disease/frontotemporal dementia	1	0
615426	Amyotrophic Lateral Sclerosis 20	164017	HNRNPA1		1	1	PS105400	Amyotrophic lateral sclerosis	1	0
615438	Infantile Liver Failure Syndrome 1	151350	LARS1	Lars	1	1	PS615438	Infantile liver failure syndrome	0	1
615440	Combined Oxidative Phosphorylation Deficiency 17	605367	ELAC2	Elac2	1	1	PS609060	Combined oxidative phosphorylation deficiency	1	0		['fast muscle cell', 'slow muscle cell']	['striated muscle cell', 'myelinating Schwann cell']
615441	Ventricular Tachycardia, Catecholaminergic Polymorphic, 5, With Orwithout Muscle Weakness	603283	TRDN	Trdn	1	1	PS604772	Ventricular tachycardia, catecholaminergic polymorphic	1	1			['striated muscle cell']
615465	Hartsfield Syndrome	136350	FGFR1	Fgfr1	1	1			1	1
615471	Mitochondrial Dna Depletion Syndrome 13 (encephalomyopathic Type)	605654	FBXL4	Fbxl4	1	1	PS603041	Mitochondrial DNA depletion syndrome	1	0	Yes
615474	Primary Aldosteronism, Seizures, And Neurologic Abnormalities	114206	CACNA1D	Cacna1d	1	1			0	0
615476	Epileptic Encephalopathy, Early Infantile, 18	615463	SZT2	Szt2	1	1	PS308350	Developmental and epileptic encephalopathy	0	0
615485	Bainbridge-ropers Syndrome	615115	ASXL3	Asxl3	1	1			0	0
615490	Charcot-marie-tooth Disease, Axonal, Type 2r	614141	TRIM2	Trim2	1	1	PS118220	Charcot-Marie-Tooth disease	1	1
615491	Spastic Paraplegia 79, Autosomal Recessive	191342	UCHL1	Uchl1	1	1	PS303350	Spastic paraplegia	1	1
615493	Mental Retardation, Autosomal Recessive 37	600465	ANK3	Ank3	1	1	PS249500	Mental retardation, autosomal recessive	1	1
615501	Molybdenum Cofactor Deficiency, Complementation Group C	603930	GPHN	Gphn	1	1	PS252150	Molybdenum cofactor deficiency	1	1
615502	Mental Retardation, Autosomal Dominant 21	604167	CTCF	Ctcf	1	1	PS156200	Mental retardation, autosomal dominant	1	1
615510	Alacrima, Achalasia, And Mental Retardation Syndrome	615495	GMPPA	Gmppa	1	1			1	1
615511	Myopathy Due To Myoadenylate Deaminase Deficiency	102770	AMPD1	Ampd1	1	1			1	1		['fast muscle cell']
615512	Triosephosphate Isomerase Deficiency	190450	TPI1	Tpi1	1	1			1	1
615515	Amyotrophic Lateral Sclerosis 19	600543	ERBB4	Erbb4	1	1	PS105400	Amyotrophic lateral sclerosis	1	0
615516	Mental Retardation, Autosomal Recessive 38	605837	HERC2	Herc2	1	1	PS249500	Mental retardation, autosomal recessive	1	1
615524	Microphthalmia, Syndromic 12	180220	RARB	Rarb	1	1	PS309800	Microphthalmia, syndromic	1	0		['capillary endothelial cell']
615527	Candidiasis, Familial, 8	607043	TRAF3IP2	Traf3ip2	1	1	PS114580	Familial candidiasis	1	1
615528	Parkinson Disease 19, Juvenile-onset	608375	DNAJC6	Dnajc6	1	1	PS168600	Parkinson disease	0	0
615539	Ehlers-danlos Syndrome, Musculocontractural Type 2	605942	DSE	Dse	1	1	PS130000	Ehlers-Danlos syndrome	1	1		['mesenchymal stem cell', 'tendon cell']	['tendon cell', 'stromal cell']
615546	Van Maldergem Syndrome 2	612411	FAT4	Fat4	1	1	PS601390	Van Maldergem syndrome	1	1			['capillary endothelial cell', 'tendon cell']
615547	Schaaf-yang Syndrome	605283	MAGEL2	Magel2	1	1			0	0
615548	Neuropathy, Hereditary Sensory And Autonomic, Type Vii	604385	SCN11A	Scn11a	1	1	PS162400	Hereditary sensory and autonomic neuropathy	0	0		['capillary endothelial cell']
615553	Arthrogryposis, Mental Retardation, And Seizures	605632	SLC35A3	Slc35a3	1	1			1	0
615560	Otofaciocervical Syndrome 2	167411	PAX1	Pax1	1	1	PS166780	Otofaciocervical syndrome	0	0
615574	Asparagine Synthetase Deficiency	108370	ASNS	Asns	1	1			0	1
615575	Neuronopathy, Distal Hereditary Motor, Type Iid	608533	FBXO38		1	1			1	0
615578	Combined Oxidative Phosphorylation Deficiency 18	615564	SFXN4	Sfxn4	1	1	PS609060	Combined oxidative phosphorylation deficiency	1	0		['fast muscle cell', 'slow muscle cell']	['striated muscle cell', 'myelinating Schwann cell']
615582	Loeys-dietz Syndrome 5	190230	TGFB3	Tgfb3	1	1	PS609192	Loeys-Dietz syndrome	1	1		['endothelial cell of lymphatic vessel']	['tendon cell']
615595	Combined Oxidative Phosphorylation Deficiency 19	613311	LYRM4	Lyrm4	1	1	PS609060	Combined oxidative phosphorylation deficiency	1	1		['fast muscle cell', 'slow muscle cell']	['striated muscle cell', 'myelinating Schwann cell']
615596	Congenital Disorder Of Glycosylation, Type Iw	601134	STT3A	Stt3a	1	1	PS212065	Congenital disorders of glycosylation, type I	1	1
615597	Congenital Disorder Of Glycosylation, Type Ix	608605	STT3B	Stt3b	1	1	PS212065	Congenital disorders of glycosylation, type I	1	1
615599	Mental Retardation, Autosomal Recessive 40	604912	TAF2	Taf2	1	1	PS249500	Mental retardation, autosomal recessive	1	0
615625	Spastic Paraplegia 72, Autosomal Recessive	609347	REEP2	Reep2	1	1			1	0		['capillary endothelial cell']
615636	Joubert Syndrome 21	611654	CSPP1	Cspp1	1	1	PS213300	Joubert syndrome	1	1			['smooth muscle cell']
615637	Mental Retardation, Autosomal Recessive 41	615620	KPTN	Kptn	1	1	PS249500	Mental retardation, autosomal recessive	1	1
615643	Neurodegeneration With Brain Iron Accumulation 6	609855	COASY	Coasy	1	1	PS234200	Neurodegeneration with brain iron accumulation	1	1
615658	Spastic Paraplegia 57, Autosomal Recessive	602498	TFG	Tfg	1	1	PS303350	Spastic paraplegia	1	1
615663	Warburg Micro Syndrome 4	611663	TBC1D20	Tbc1d20	1	1	PS600118	Warburg micro syndrome	1	0
615665	Joubert Syndrome 22	602676	PDE6D	Pde6d	1	1	PS213300	Joubert syndrome	1	1			['smooth muscle cell']
615673	Myopathy With Extrapyramidal Signs	605084	MICU1	Micu1	1	1			1	1
615681	Spastic Paraplegia 62, Autosomal Recessive	611604	ERLIN1	Erlin1	1	1	PS303350	Spastic paraplegia	1	1
615683	Spastic Paraplegia 64, Autosomal Recessive	601752	ENTPD1	Entpd1	1	1	PS303350	Spastic paraplegia	1	1
615685	Spastic Paraplegia 61, Autosomal Recessive	607669	ARL6IP1	Arl6ip1	1	1	PS303350	Spastic paraplegia	1	1
615686	Spastic Paraplegia 63, Autosomal Recessive	102771	AMPD2	Ampd2	1	1	PS303350	Spastic paraplegia	1	1
615704	Poikiloderma, Hereditary Fibrosing, With Tendon Contractures, Myopathy,and Pulmonary Fibrosis	615584	FAM111B		1	1			0	0
615715	Bone Marrow Failure Syndrome 2	615667	ERCC6L2	Ercc6l2	1	1	PS614675	Bone marrow failure syndrome	1	0
615716	Hyperphosphatasia With Mental Retardation Syndrome 4	611801	PGAP3	Pgap3	1	1	PS239300	Hyperphosphatasia with mental retardation syndrome	0	0
615731	Nemaline Myopathy 9	607701	KLHL41	Klhl41	1	1	PS161800	Nemaline myopathy	1	0	Yes	['fast muscle cell', 'slow muscle cell']	['striated muscle cell']
615760	Microcephaly, Progressive, With Seizures And Cerebral And Cerebellaratrophy	603727	QARS1		1	1			0	0
615763	Cortical Dysplasia, Complex, With Other Brain Malformations 5	615101	TUBB2A	Tubb2a	1	1	PS614039	Cortical dysplasia, complex, with other brain malformations	1	1
615768	Spinocerebellar Ataxia, Autosomal Recessive 16	607207	STUB1	Stub1	1	1	PS213200	Spinocerebellar ataxia, autosomal recessive	1	1			['capillary endothelial cell', 'myelinating Schwann cell']
615777	Desbuquois Dysplasia 2	608124	XYLT1	Xylt1	1	1	PS251450	Desbuquois dysplasia	1	0
615802	Mental Retardation, Autosomal Recessive 42	611655	PGAP1	Pgap1	1	1	PS249500	Mental retardation, autosomal recessive	1	0
615803	Pontocerebellar Hypoplasia, Type 10	608757	CLP1	Clp1	1	1	PS607596	Pontocerebellar hypoplasia	1	1
615809	Pontocerebellar Hypoplasia, Type 9	102771	AMPD2	Ampd2	1	1	PS607596	Pontocerebellar hypoplasia	1	1
615816	Immunodeficiency 23	172100	PGM3	Pgm3	1	1	PS300755	Immunodeficiency (Select Examples)	1	1		['cd4-positive, alpha-beta t cell', 't cell']	['T-helper 17 cell']
615817	Mental Retardation, Autosomal Recessive 43	615748	WASHC4	Washc4	1	1	PS249500	Mental retardation, autosomal recessive	1	0
615824	Mitochondrial Complex Iii Deficiency, Nuclear Type 7	614461	UQCC2	Uqcc2	1	1	PS124000	Mitochondrial complex III deficiency, nuclear type	1	0		['fast muscle cell', 'slow muscle cell']	['striated muscle cell']
615829	Xia-gibbs Syndrome	615790	AHDC1	Ahdc1	1	1			1	1
615833	Epileptic Encephalopathy, Early Infantile, 21	611623	NECAP1	Necap1	1	1	PS308350	Developmental and epileptic encephalopathy	1	1
615834	Mental Retardation, Autosomal Dominant 26	607270	AUTS2	Auts2	1	1	PS156200	Mental retardation, autosomal dominant	1	1
615838	Mitochondrial Complex Iii Deficiency, Nuclear Type 8	615831	LYRM7	Lyrm7	1	1	PS124000	Mitochondrial complex III deficiency, nuclear type	1	0		['fast muscle cell', 'slow muscle cell']	['striated muscle cell']
615846	Aicardi-goutieres Syndrome 7	606951	IFIH1	Ifih1	1	1	PS225750	Aicardi-Goutieres syndrome	1	1			['blood vessel endothelial cell']
615851	Pontocerebellar Hypoplasia, Type 2e	615850	VPS53	Vps53	1	1	PS607596	Pontocerebellar hypoplasia	1	1
615873	Helsmoortel-van Der Aa Syndrome	611386	ADNP	Adnp	1	1			1	1
615879	Tatton-brown-rahman Syndrome	602769	DNMT3A	Dnmt3a	1	1			1	1
615883	Myopathy, Tubular Aggregate, 2	610277	ORAI1	Orai1	1	1	PS160565	Myopathy, tubular aggregate	1	1	Yes	['cd4-positive, alpha-beta t cell']
615889	Leukoencephalopathy, Progressive, With Ovarian Failure	612035	AARS2	Aars2	1	1			0	0
615895	Polyglucosan Body Myopathy, Early-onset, With Or Without Immunodeficiency	610924	RBCK1	Rbck1	1	1	PS615895	Polyglucosan body myopathy	1	1	Yes
615905	Epileptic Encephalopathy, Early Infantile, 25, With Amelogenesis Imperfecta	608305	SLC13A5	Slc13a5	1	1	PS308350	Developmental and epileptic encephalopathy	0	0
615911	Frontotemporal Dementia And/or Amyotrophic Lateral Sclerosis 2	615903	CHCHD10	Chchd10	1	1	PS105400	Amyotrophic lateral sclerosis	1	1
615911	Frontotemporal Dementia And/or Amyotrophic Lateral Sclerosis 2	615903	CHCHD10	Chchd10	1	1	PS105550	Frontotemporal dementia and/or Amyotrophic Lateral Sclerosis	1	1		['mast cell']
615917	Combined Oxidative Phosphorylation Deficiency 20	612802	VARS2	Vars2	1	1	PS609060	Combined oxidative phosphorylation deficiency	0	0		['fast muscle cell', 'slow muscle cell']	['striated muscle cell', 'myelinating Schwann cell']
615918	Combined Oxidative Phosphorylation Deficiency 21	612805	TARS2	Tars2	1	1	PS609060	Combined oxidative phosphorylation deficiency	0	0		['fast muscle cell', 'slow muscle cell']	['striated muscle cell', 'myelinating Schwann cell']
615919	Ataxia-telangiectasia-like Disorder 2	176740	PCNA	Pcna	1	1	PS604391	Ataxia-telangiectasia-like disorder	1	1			['blood vessel endothelial cell']
615924	Encephalopathy, Progressive, With Or Without Lipodystrophy	606158	BSCL2	Bscl2	1	1			0	1
615926	Webb-dattani Syndrome	606036	ARNT2	Arnt2	1	1			1	1			['myelinating Schwann cell']
615934	Sting-associated Vasculopathy, Infantile-onset	612374	STING1	Sting1	1	1			0	0
615945	Spinocerebellar Ataxia 37	603448	DAB1	Dab1	1	1	PS164400	Spinocerebellar ataxia	1	0			['smooth muscle cell']
615948	Orofaciodigital Syndrome Xiv	615944	C2CD3	C2cd3	1	1	PS311200	Orofaciodigital syndrome	1	0
615959	Myopathy, Centronuclear, 5	615950	SPEG	Speg	1	1	PS160150	Myopathy, centronuclear	1	1	Yes	['fast muscle cell', 'slow muscle cell']
615960	Poretti-boltshauser Syndrome	150320	LAMA1	Lama1	1	1			0	0
615980	Abdominal Obesity-metabolic Syndrome 4	151750	LIPE	Lipe	1	1	PS151660	Lipodystrophy, familial partial	1	1		['capillary endothelial cell']	['capillary endothelial cell', 'blood vessel endothelial cell']
616006	Hennekam Lymphangiectasia-lymphedema Syndrome 2	612411	FAT4	Fat4	1	1	PS235510	Hennekam lymphangiectasia-lymphedema syndrome	1	1			['tendon cell']
616007	Cataracts, Growth Hormone Deficiency, Sensory Neuropathy, Sensorineural Hearing Loss, And Skeletal Dysplasia	612801	IARS2	Iars2	1	1			1	1
616025	Hyperphosphatasia With Mental Retardation Syndrome 5	610275	PIGW	Pigw	1	1	PS239300	Hyperphosphatasia with mental retardation syndrome	0	0
616034	2,4-@dienoyl-coa Reductase Deficiency	615787	NADK2	Nadk2	1	1			1	0
616039	Charcot-marie-tooth Disease, Recessive Intermediate D	602072	COX6A1	Cox6a1	1	1	PS118220	Charcot-Marie-Tooth disease	1	1
616040	Myasthenic Syndrome, Presynaptic, Congenital, With Or Without Motorneuropathy	600104	SYT2	Syt2	1	1	PS601462	Myasthenic syndrome, congenital	0	0	Yes
616045	Combined Oxidative Phosphorylation Deficiency 22	164360	ATP5F1A	Atp5a1	1	1	PS609060	Combined oxidative phosphorylation deficiency	1	1		['fast muscle cell', 'slow muscle cell']	['striated muscle cell', 'myelinating Schwann cell']
616052	Muscular Dystrophy-dystroglycanopathy (limb-girdle), Type C, 7	614631	CRPPA	Crppa	1	1	PS253600	Muscular dystrophy, limb-girdle, autosomal recessive	0	0	Yes
616052	Muscular Dystrophy-dystroglycanopathy (limb-girdle), Type C, 7	614631	CRPPA	Crppa	1	1	PS609308	Muscular dystrophy-dystroglycanopathy, type C	0	0	Yes
616053	Spinocerebellar Ataxia 40	611204	CCDC88C	Ccdc88c	1	1	PS164400	Spinocerebellar ataxia	1	0			['smooth muscle cell']
616056	Epileptic Encephalopathy, Early Infantile, 26	600397	KCNB1	Kcnb1	1	1	PS308350	Developmental and epileptic encephalopathy	1	1
616081	Pontocerebellar Hypoplasia, Type 1c	606019	EXOSC8	Exosc8	1	1	PS607596	Pontocerebellar hypoplasia	1	1
616084	Sideroblastic Anemia With B-cell Immunodeficiency, Periodic Fevers, And Developmental Delay	612907	TRNT1	Trnt1	1	1			1	1
616094	Muscular Dystrophy-dystroglycanopathy (limb-girdle), Type C, 12	615247	POMK	Pomk	1	1	PS609308	Muscular dystrophy-dystroglycanopathy, type C	0	0
616111	Mitochondrial Complex Iii Deficiency, Nuclear Type 9	616097	UQCC3	Uqcc3	1	1	PS124000	Mitochondrial complex III deficiency, nuclear type	1	0		['fast muscle cell', 'slow muscle cell']	['striated muscle cell']
616116	Mental Retardation, Autosomal Recessive 46	600853	NDST1	Ndst1	1	1	PS249500	Mental retardation, autosomal recessive	1	1
616127	Spinocerebellar Ataxia, Autosomal Recessive 17	616120	CWF19L1	Cwf19l1	1	1	PS213200	Spinocerebellar ataxia, autosomal recessive	0	0			['capillary endothelial cell', 'myelinating Schwann cell']
616139	Epileptic Encephalopathy, Early Infantile, 27	138252	GRIN2B	Grin2b	1	1	PS308350	Developmental and epileptic encephalopathy	0	0
616140	Leukodystrophy, Hypomyelinating, 9	107820	RARS1	Rars	1	1	PS312080	Leukodystrophy, hypomyelinating	0	1
616145	Catel-manzke Syndrome	616146	TGDS	Tgds	1	1			1	0
616154	Peroxisomal Fatty Acyl-coa Reductase 1 Disorder	616107	FAR1	Far1	1	1			1	1
616155	Charcot-marie-tooth Disease, Axonal, Type 2s	600502	IGHMBP2	Ighmbp2	1	1	PS118220	Charcot-Marie-Tooth disease	1	0
616158	Mental Retardation, Autosomal Dominant 31	600473	PURA	Pura	1	1	PS156200	Mental retardation, autosomal dominant	1	1
616165	Nemaline Myopathy 10	616112	LMOD3	Lmod3	1	1	PS161800	Nemaline myopathy	1	1	Yes	['fast muscle cell', 'slow muscle cell']	['striated muscle cell']
616193	Mental Retardation, Autosomal Recessive 47	606373	FMN2	Fmn2	1	1	PS249500	Mental retardation, autosomal recessive	0	0
616198	Combined Oxidative Phosphorylation Deficiency 23	608536	GTPBP3	Gtpbp3	1	1	PS609060	Combined oxidative phosphorylation deficiency	0	0		['fast muscle cell', 'slow muscle cell']	['striated muscle cell', 'myelinating Schwann cell']
616199	Polyglucosan Body Myopathy 2	603942	GYG1	Gyg	1	1	PS615895	Polyglucosan body myopathy	1	1	Yes
616200	Ruijs-aalfs Syndrome	616086	SPRTN	Sprtn	1	1			1	0
616204	Spinocerebellar Ataxia, Autosomal Recessive 18	602368	GRID2	Grid2	1	1	PS213200	Spinocerebellar ataxia, autosomal recessive	0	0			['capillary endothelial cell', 'myelinating Schwann cell']
616209	Myopathy, Isolated Mitochondrial, Autosomal Dominant	615903	CHCHD10	Chchd10	1	1			1	1		['slow muscle cell']
616211	Epileptic Encephalopathy, Early Infantile, 28	605131	WWOX	Wwox	1	1	PS308350	Developmental and epileptic encephalopathy	1	0
616212	Lissencephaly 6, With Microcephaly	602703	KATNB1	Katnb1	1	1	PS607432	Lissencephaly	0	0			['stromal cell', 'myelinating Schwann cell']
616224	Myasthenic Syndrome, Congenital, 22	609557	PREPL	Prepl	1	1	PS601462	Myasthenic syndrome, congenital	1	0
616227	Myasthenic Syndrome, Congenital, Without Tubular Aggregates	612866	ALG14	Alg14	1	1	PS601462	Myasthenic syndrome, congenital	1	1
616228	Myasthenic Syndrome, Congenital, 14	607905	ALG2	Alg2	1	1	PS601462	Myasthenic syndrome, congenital	1	0	Yes
616228	Myasthenic Syndrome, Congenital, 14	607905	ALG2	Alg2	1	1	PS610542	Myasthenic syndrome, congenital, with tubular aggregates	1	0	Yes
616231	Myopathy, Vacuolar, With Casq1 Aggregates	114250	CASQ1	Casq1	1	1			1	1		['fast muscle cell']	['striated muscle cell']
616239	Combined Oxidative Phosphorylation Deficiency 24	612803	NARS2	Nars2	1	1	PS609060	Combined oxidative phosphorylation deficiency	0	0		['fast muscle cell', 'slow muscle cell']	['striated muscle cell', 'myelinating Schwann cell']
616248	Lethal Congenital Contracture Syndrome 6	613915	ZBTB42	Zbtb42	1	1	PS253310	Lethal congenital contracture syndrome	0	0
616258	Meckel Syndrome 12	611279	KIF14	Kif14	1	1	PS249000	Meckel syndrome	0	0
616260	Tenorio Syndrome	610432	RNF125		1	1			1	0
616263	Neurologic, Endocrine, And Pancreatic Disease, Multisystem, Infantile-onset	608625	PTRH2	Ptrh2	1	1			1	1
616266	Congenital Contractures Of The Limbs And Face, Hypotonia, And Developmental Delay	611549	NALCN	Nalcn	1	1			0	0
616268	Arboleda-tham Syndrome	601408	KAT6A	Kat6a	1	1			1	0
616271	3-@methylglutaconic Aciduria With Cataracts, Neurologic Involvement,and Neutropenia	616254	CLPB	Clpb	1	1	PS250950	3-Methylglutaconic aciduria	1	1
616276	Coenzyme Q10 Deficiency, Primary, 7	612898	COQ4	Coq4	1	1	PS607426	Coenzyme Q10 deficiency, primary	1	0	Yes	['fast muscle cell', 'slow muscle cell']	['striated muscle cell']
616277	Mitochondrial Short-chain Enoyl-coa Hydratase 1 Deficiency	602292	ECHS1	Echs1	1	1			1	1
616280	Charcot-marie-tooth Disease, Axonal, Type 2u	156560	MARS1	Mars1	1	1	PS118220	Charcot-Marie-Tooth disease	0	0
616281	Mental Retardation, Autosomal Recessive 49	138210	GPT2	Gpt2	1	1			1	1
616282	Spastic Paraplegia 73, Autosomal Dominant	608846	CPT1C	Cpt1c	1	1	PS303350	Spastic paraplegia	0	0
616286	Lethal Congenital Contracture Syndrome 7	602346	CNTNAP1	Cntnap1	1	1	PS253310	Lethal congenital contracture syndrome	0	0
616287	Lethal Congenital Contracture Syndrome 8	600294	ADCY6	Adcy6	1	1	PS253310	Lethal congenital contracture syndrome	1	1
616299	Lipoyltransferase 1 Deficiency	610284	LIPT1	Lipt1	1	1			1	0
616304	Myasthenic Syndrome, Congenital, 17	604270	LRP4	Lrp4	1	1	PS601462	Myasthenic syndrome, congenital	1	1
616313	Myasthenic Syndrome, Congenital, 2a, Slow-channel	100710	CHRNB1	Chrnb1	1	1	PS601462	Myasthenic syndrome, congenital	1	1	Yes
616314	Myasthenic Syndrome, Congenital, 2c, Associated With Acetylcholinereceptor Deficiency	100710	CHRNB1	Chrnb1	1	1	PS601462	Myasthenic syndrome, congenital	1	1
616321	Myasthenic Syndrome, Congenital, 3a, Slow-channel	100720	CHRND	Chrnd	1	1	PS601462	Myasthenic syndrome, congenital	0	0
616322	Myasthenic Syndrome, Congenital, 3b, Fast-channel	100720	CHRND	Chrnd	1	1	PS601462	Myasthenic syndrome, congenital	0	0	Yes
616323	Myasthenic Syndrome, Congenital, 3c, Associated With Acetylcholine Receptor Deficiency	100720	CHRND	Chrnd	1	1	PS601462	Myasthenic syndrome, congenital	0	0
616324	Myasthenic Syndrome, Congenital, 4b, Fast-channel	100725	CHRNE	Chrne	1	1	PS601462	Myasthenic syndrome, congenital	0	1	Yes
616325	Myasthenic Syndrome, Congenital, 9, Associated With Acetylcholinereceptor Deficiency	601296	MUSK	Musk	1	1	PS601462	Myasthenic syndrome, congenital	1	1	Yes
616326	Myasthenic Syndrome, Congenital, 11, Associated With Acetylcholinereceptor Deficiency	601592	RAPSN	Rapsn	1	1	PS601462	Myasthenic syndrome, congenital	1	1	Yes
616330	Myasthenic Syndrome, Congenital, 18	600322	SNAP25	Snap25	1	1	PS601462	Myasthenic syndrome, congenital	0	0
616339	Epileptic Encephalopathy, Early Infantile, 29	601065	AARS1	Aars	1	1	PS308350	Developmental and epileptic encephalopathy	0	1
616342	Lissencephaly 7 With Cerebellar Hypoplasia	123831	CDK5	Cdk5	1	1	PS607432	Lissencephaly	1	1			['stromal cell', 'myelinating Schwann cell']
616346	Epileptic Encephalopathy, Early Infantile, 31	602377	DNM1	Dnm1	1	1	PS308350	Developmental and epileptic encephalopathy	1	1
616351	Mental Retardation, Autosomal Dominant 34	604677	CERT1	Cert1	1	1	PS156200	Mental retardation, autosomal dominant	0	0
616354	Spinocerebellar Ataxia, Autosomal Recessive 20	616105	SNX14	Snx14	1	1	PS213200	Spinocerebellar ataxia, autosomal recessive	1	0			['capillary endothelial cell', 'myelinating Schwann cell']
616355	Mental Retardation, Autosomal Dominant 35	601646	PPP2R5D	Ppp2r5d	1	1	PS156200	Mental retardation, autosomal dominant	1	1
616362	Mental Retardation, Autosomal Dominant 36	605983	PPP2R1A	Ppp2r1a	1	1	PS156200	Mental retardation, autosomal dominant	1	1
616364	White-sutton Syndrome	614787	POGZ	Pogz	1	1	PS156200	Mental retardation, autosomal dominant	1	0
616370	Multiple Mitochondrial Dysfunctions Syndrome 4	615317	ISCA2	Isca2	1	1	PS605711	Multiple mitochondrial dysfunctions syndrome	1	1		['fast muscle cell', 'slow muscle cell']	['striated muscle cell', 'pericyte cell']
616393	Mental Retardation, Autosomal Dominant 38	602959	EEF1A2	Eef1a2	1	1	PS156200	Mental retardation, autosomal dominant	1	1
616395	Trichothiodystrophy 3, Photosensitive	608780	GTF2H5	Gtf2h5	1	1	PS601675	Trichothiodystrophy	1	1
616398	Dystonia 26, Myoclonic	616386	KCTD17	Kctd17	1	1	PS128100	Dystonia	1	1
616409	Epileptic Encephalopathy, Early Infantile, 33	602959	EEF1A2	Eef1a2	1	1	PS308350	Developmental and epileptic encephalopathy	1	1
616420	Leukodystrophy, Hypomyelinating, 10	616406	PYCR2	Pycr2	1	1	PS312080	Leukodystrophy, hypomyelinating	1	1
616430	Combined Oxidative Phosphorylation Deficiency 25	609728	MARS2	Mars2	1	1	PS609060	Combined oxidative phosphorylation deficiency	1	0		['fast muscle cell', 'slow muscle cell']	['striated muscle cell', 'myelinating Schwann cell']
616437	Frontotemporal Dementia And/or Amyotrophic Lateral Sclerosis 3	601530	SQSTM1	Sqstm1	1	1	PS105400	Amyotrophic lateral sclerosis	1	1
616437	Frontotemporal Dementia And/or Amyotrophic Lateral Sclerosis 3	601530	SQSTM1	Sqstm1	1	1	PS105550	Frontotemporal dementia and/or Amyotrophic Lateral Sclerosis	1	1		['mast cell']
616439	Frontotemporal Dementia And/or Amyotrophic Lateral Sclerosis 4	604834	TBK1	Tbk1	1	1	PS105400	Amyotrophic lateral sclerosis	1	1
616439	Frontotemporal Dementia And/or Amyotrophic Lateral Sclerosis 4	604834	TBK1	Tbk1	1	1	PS105550	Frontotemporal dementia and/or Amyotrophic Lateral Sclerosis	1	1		['mast cell']
616449	Basel-vanagaite-smirin-yosef Syndrome	610197	MED25	Med25	1	1			1	1
616451	Spastic Paraplegia 74, Autosomal Recessive	615316	IBA57	Iba57	1	1	PS303350	Spastic paraplegia	1	0
616455	Zimmermann-laband Syndrome 2	606939	ATP6V1B2	Atp6v1b2	1	1	PS135500	Zimmermann-Laband syndrome	1	1
616457	Congenital Disorder Of Glycosylation, Type Iz	114010	CAD	Cad	1	1	PS308350	Developmental and epileptic encephalopathy	0	0
616459	Al-raqad Syndrome	610534	DCPS	Dcps	1	1			1	1
616470	Ullrich Congenital Muscular Dystrophy 2	120320	COL12A1	Col12a1	1	1	PS254090	Ullrich congenital muscular dystrophy	1	1		['mesenchymal stem cell', 'tendon cell']	['tendon cell', 'stromal cell', 'skeletal muscle fibroblast; fibroblast', 'skeletal muscle fibroblast; fibroblast.1']
616471	Bethlem Myopathy 2	120320	COL12A1	Col12a1	1	1	PS130000	Ehlers-Danlos syndrome	1	1	Yes	['mesenchymal stem cell', 'tendon cell']	['tendon cell', 'stromal cell']
616471	Bethlem Myopathy 2	120320	COL12A1	Col12a1	1	1	PS158810	Bethlem myopathy	1	1	Yes	['mesenchymal stem cell', 'tendon cell']	['tendon cell', 'stromal cell', 'skeletal muscle fibroblast; fibroblast', 'skeletal muscle fibroblast; fibroblast.1']
616479	Progressive External Ophthalmoplegia With Mitochondrial Dna Deletions,autosomal Recessive 2	604123	RNASEH1	Rnaseh1	1	1	PS157640	Progressive external ophthalmoplegia with mtDNA deletions	1	1
616486	Microcephaly 15, Primary, Autosomal Recessive	614397	MFSD2A	Mfsd2a	1	1	PS251200	Microcephaly, primary autosomal recessive	1	0		['t cell']
616489	Growth Restriction, Severe, With Distinctive Facies	147470	IGF2	Igf2	1	1	PS180860	Silver-Russell syndrome	1	1			['endothelial cell of artery']
616494	Leukodystrophy, Hypomyelinating, 11	610060	POLR1C	Polr1c	1	1	PS312080	Leukodystrophy, hypomyelinating	1	1
616503	*616503 Lethal Congenital Contracture Syndrome 9	612243	ADGRG6	Adgrg6	1	1	PS253310	Lethal congenital contracture syndrome	1	0
616505	Neuropathy, Hereditary Motor And Sensory, Type Vib	610826	SLC25A46	Slc25a46	1	1			1	1
616507	Osteogenesis Imperfecta, Type Xvii	182120	SPARC	Sparc	1	1	PS166200	Osteogenesis imperfecta	1	1		['pericyte cell']	['tendon cell']
616516	Emery-dreifuss Muscular Dystrophy 3, Autosomal Recessive	150330	LMNA	Lmna	1	1	PS310300	Emery-Dreifuss muscular dystrophy	1	1	Yes
616531	Polymicrogyria, Perisylvian, With Cerebellar Hypoplasia And Arthrogryposis	600286	PI4KA	Pi4ka	1	1			1	1
616538	Muscular Dystrophy-dystroglycanopathy (congenital With Brain And Eyeanomalies), Type A, 9	128239	DAG1	Dag1	1	1	PS236670	Muscular dystrophy-dystroglycanopathy, type A	1	1
616539	Combined Oxidative Phosphorylation Deficiency 26	611023	TRMT5	Trmt5	1	1	PS609060	Combined oxidative phosphorylation deficiency	1	0		['fast muscle cell', 'slow muscle cell']	['striated muscle cell', 'myelinating Schwann cell']
616540	Epilepsy, Progressive Myoclonic, 9	150341	LMNB2	Lmnb2	1	1	PS254800	Epilepsy, progressive myoclonic	1	0			['skeletal muscle fibroblast; fibroblast.1']
616546	Short-rib Thoracic Dysplasia 14 With Polydactyly	610178	KIAA0586	2700049A03Rik	1	1	PS208500	Short-rib thoracic dysplasia	1	1
616549	Klippel-feil Syndrome 4, Autosomal Recessive, With Myopathy And Facial Dysmorphism	607295	MYO18B	Myo18b	1	1	PS118100	Klippel-Feil syndrome	1	0		['slow muscle cell']
616570	Cerebrooculofacioskeletal Syndrome 3	133530	ERCC5	Ercc5	1	1	PS214150	Cerebrooculofacioskeletal syndrome	1	1
616577	Epilepsy, Hearing Loss, And Mental Retardation Syndrome	613940	SPATA5	Spata5	1	1			1	0
616579	Mental Retardation, Autosomal Dominant 40	616327	CHAMP1	Champ1	1	1	PS156200	Mental retardation, autosomal dominant	1	0
616580	Au-kline Syndrome	600712	HNRNPK	Hnrnpk	1	1			1	1
616586	Spastic Paraplegia 9b, Autosomal Recessive	138250	ALDH18A1	Aldh18a1	1	1	PS303350	Spastic paraplegia	1	1
616602	Craniosynostosis 6	600470	ZIC1	Zic1	1	1	PS123100	Craniosynostosis	1	0		['skeletal muscle satellite stem cell']
616603	Cutis Laxa, Autosomal Dominant 3	138250	ALDH18A1	Aldh18a1	1	1	PS123700	Cutis laxa	1	1
616625	Charcot-marie-tooth Disease, Axonal, Type 2w	142810	HARS1	Hars	1	1	PS118220	Charcot-Marie-Tooth disease	0	1
616632	Seizures, Cortical Blindness, Microcephaly Syndrome	602121	DIAPH1	Diaph1	1	1			1	0
616638	Smith-kingsmore Syndrome	601231	MTOR	Mtor	1	1			1	1			['smooth muscle cell']
616640	Epilepsy, Progressive Myoclonic, 10	616639	PRDM8	Prdm8	1	1	PS254800	Epilepsy, progressive myoclonic	1	1			['skeletal muscle fibroblast; fibroblast.1']
616647	Epileptic Encephalopathy, Early Infantile, 35	147520	ITPA	Itpa	1	1	PS308350	Developmental and epileptic encephalopathy	1	1
616651	Roifman Syndrome	601428	RNU4ATAC		1	1			0	0
616654	Joubert Syndrome 24	613846	TCTN2	Tctn2	1	1	PS213300	Joubert syndrome	0	0			['smooth muscle cell']
616657	Spastic Tetraplegia, Thin Corpus Callosum, And Progressive Microcephaly	600229	SLC1A4	Slc1a4	1	1			1	0		['t cell']
616668	Charcot-marie-tooth Disease, Axonal, Type 2x	610844	SPG11	Spg11	1	1	PS118220	Charcot-Marie-Tooth disease	1	0
616672	Combined Oxidative Phosphorylation Deficiency 27	612800	CARS2	Cars2	1	1	PS609060	Combined oxidative phosphorylation deficiency	1	0		['fast muscle cell', 'slow muscle cell']	['striated muscle cell', 'myelinating Schwann cell']
616680	Spastic Paraplegia 75, Autosomal Recessive	159460	MAG	Mag	1	1	PS303350	Spastic paraplegia	0	1
616681	Microcephaly 16, Primary, Autosomal Recessive	616062	ANKLE2	Ankle2	1	1	PS251200	Microcephaly, primary autosomal recessive	1	0		['t cell']
616682	Seizures, Scoliosis, And Macrocephaly Syndrome	608210	EXT2	Ext2	1	1			1	1
616683	Leukodystrophy, Hypomyelinating, 12	608549	VPS11	Vps11	1	1	PS312080	Leukodystrophy, hypomyelinating	1	1
616684	Charcot-marie-tooth Disease, Type 4k	185620	SURF1	Surf1	1	1	PS118220	Charcot-Marie-Tooth disease	1	1
616688	Charcot-marie-tooth Disease, Axonal, Type 2z	616661	MORC2	Morc2a	1	1	PS118220	Charcot-Marie-Tooth disease	1	0
616708	Desanto-shinawi Syndrome	615049	WAC	Wac	1	1			1	1
616716	Rhizomelic Chondrodysplasia Punctata, Type 5	600414	PEX5	Pex5	1	1	PS215100	Rhizomelic chondrodysplasia punctata	1	1		['slow muscle cell']
616719	Spinocerebellar Ataxia, Autosomal Recessive 21	607982	SCYL1	Scyl1	1	1	PS213200	Spinocerebellar ataxia, autosomal recessive	1	1			['capillary endothelial cell', 'myelinating Schwann cell']
616720	Myasthenic Syndrome, Congenital, 19	120350	COL13A1	Col13a1	1	1	PS601462	Myasthenic syndrome, congenital	1	1	Yes
616721	Congenital Disorder Of Glycosylation, Type Iin	608732	SLC39A8	Slc39a8	1	1	PS212066	Congenital disorders of glycosylation, type II	1	0
616723	Spondyloepimetaphyseal Dysplasia, Faden-alkuraya Type	616585	RSPRY1	Rspry1	1	1			1	1
616728	Cleft Palate, Psychomotor Retardation, And Distinctive Facial Features	609132	KDM1A	Kdm1a	1	1			1	1
616733	Coenzyme Q10 Deficiency, Primary, 8	601683	COQ7	Coq7	1	1	PS607426	Coenzyme Q10 deficiency, primary	1	1		['fast muscle cell', 'slow muscle cell']	['striated muscle cell']
616734	Skin Creases, Congenital Symmetric Circumferential, 2	605789	MAPRE2		1	1	PS156610	Skin creases, congenital symmetric circumferential	1	0
616737	Takenouchi-kosaki Syndrome	116952	CDC42		1	1			1	0
616756	Spastic Paraplegia And Psychomotor Retardation With Or Without Seizures	610876	HACE1	Hace1	1	1			0	0
616763	Leukodystrophy And Acquired Microcephaly With Or Without Dystonia	611893	PLEKHG2	Plekhg2	1	1			1	1
616777	Seckel Syndrome 9	605958	TRAIP	Traip	1	1	PS210600	Seckel syndrome	0	0
616781	Joubert Syndrome 25	616690	CEP104	Cep104	1	1	PS213300	Joubert syndrome	1	0			['smooth muscle cell']
616784	Joubert Syndrome 26	616650	KATNIP	Katnip	1	1	PS213300	Joubert syndrome	0	0			['smooth muscle cell']
616789	Mental Retardation And Distinctive Facial Features With Or Without Cardiac Defects	608771	MED13L	Med13l	1	1			1	1
616794	Combined Oxidative Phosphorylation Deficiency 28	611037	SLC25A26	Slc25a26	1	1	PS609060	Combined oxidative phosphorylation deficiency	1	0		['fast muscle cell', 'slow muscle cell']	['striated muscle cell', 'myelinating Schwann cell']
616795	Spinocerebellar Ataxia 42	604065	CACNA1G	Cacna1g	1	1	PS164400	Spinocerebellar ataxia	0	1			['smooth muscle cell']
616801	Hypotonia, Infantile, With Psychomotor Retardation And Characteristic Facies 2	612636	UNC80	Unc80	1	1	PS615419	Hypotonia, infantile, with psychomotor retardation and characteristic facies	0	1	Yes		['myelinating Schwann cell']
616803	Lamb-shaffer Syndrome	604975	SOX5	Sox5	1	1			1	1
616809	Hyperphosphatasia With Mental Retardation Syndrome 6	610662	PIGY	Pigyl	1	1	PS239300	Hyperphosphatasia with mental retardation syndrome	0	1
616811	Combined Oxidative Phosphorylation Deficiency 29	609063	TXN2	Txn2	1	1	PS609060	Combined oxidative phosphorylation deficiency	1	1		['fast muscle cell', 'slow muscle cell']	['striated muscle cell', 'myelinating Schwann cell']
616812	Muscular Dystrophy, Limb-girdle, Autosomal Recessive 25	604577	BVES	Bves	1	1	PS253600	Muscular dystrophy, limb-girdle, autosomal recessive	1	0
616816	Hypotonia, Infantile, With Psychomotor Retardation	616735	CCDC174	Ccdc174	1	1			1	0
616817	Microcephaly, Short Stature, And Impaired Glucose Metabolism 2	613257	PPP1R15B	Ppp1r15b	1	1			1	1
616827	Muscular Dystrophy, Limb-girdle, Type 2w	607908	LIMS2	Lims2	1	1	PS253600	Muscular dystrophy, limb-girdle, autosomal recessive	1	1	Yes
616828	Congenital Disorder Of Glycosylation, Type Iio	613734	CCDC115	Ccdc115	1	1	PS212066	Congenital disorders of glycosylation, type II	1	1
616829	Congenital Disorder Of Glycosylation, Type Iip	616815	TMEM199	Tmem199	1	1	PS212066	Congenital disorders of glycosylation, type II	1	0
616831	Luscan-lumish Syndrome	612778	SETD2	Setd2	1	1			1	1		['t cell']
616839	Exercise Intolerance, Riboflavin-responsive	138480	SLC25A32	Slc25a32	1	1			0	0
616840	Parkinson Disease 23, Autosomal Recessive Early-onset	608879	VPS13C	Vps13c	1	1	PS168600	Parkinson disease	1	0
616852	Myopathy, Scapulohumeroperoneal	102610	ACTA1	Acta1	1	1			1	1			['striated muscle cell']
616859	Spasticity, Childhood-onset, With Hyperglycinemia	609588	GLRX5	Glrx5	1	1			1	1
616863	Chromosome 16p13.2 Deletion Syndrome	602519	USP7	Usp7	1	1			1	1
616866	Spinal Muscular Atrophy With Congenital Bone Fractures 1	604501	TRIP4	Trip4	1	1	PS616866	Spinal muscular atrophy with congenital bone fractures	1	1		['mature nk t cell']
616867	Spinal Muscular Atrophy With Congenital Bone Fractures 2	614215	ASCC1	Ascc1	1	1	PS616866	Spinal muscular atrophy with congenital bone fractures	1	1		['mature nk t cell']
616875	Cerebellar Atrophy, Visual Impairment, And Psychomotor Retardation	616846	EMC1	Emc1	1	1			1	0
616878	Metabolic Encephalomyopathic Crises, Recurrent, With Rhabdomyolysis, Cardiac Arrhythmias, And Neurodegeneration	616830	TANGO2	Tango2	1	1			1	0		['erythrocyte']
616881	Leukodystrophy, Hypomyelinating, 13	614908	HIKESHI	Hikeshi	1	1	PS312080	Leukodystrophy, hypomyelinating	1	0
616894	Robinow Syndrome, Autosomal Dominant 3	601368	DVL3	Dvl3	1	1	PS268310	Robinow syndrome	1	0
616896	Mitochondrial Dna Depletion Syndrome 14 (encephalocardiomyopathic Type)	605290	OPA1	Opa1	1	1	PS603041	Mitochondrial DNA depletion syndrome	1	0
616897	Osteochondrodysplasia, Complex Lethal, Symoens-barnes-gistelinck Type	612758	TAPT1	Tapt1	1	1			1	1
616900	Hypotonia, Infantile, With Psychomotor Retardation And Characteristic Facies 3	616899	TBCK	Tbck	1	1	PS615419	Hypotonia, infantile, with psychomotor retardation and characteristic facies	1	0	Yes		['myelinating Schwann cell']
616907	Spastic Paraplegia 76, Autosomal Recessive	114220	CAPN1	Capn1	1	1	PS303350	Spastic paraplegia	1	1
616917	Mental Retardation, Autosomal Recessive 53	616918	PIGG	Pigg	1	1	PS249500	Mental retardation, autosomal recessive	1	0
616920	Heart And Brain Malformation Syndrome	613176	SMG9	Smg9	1	1			1	0
616921	Dyskinesia, Limb And Orofacial, Infantile-onset	610652	PDE10A	Pde10a	1	1			1	1
616924	Charcot-marie-tooth Disease, Axonal, Type 2cc	162230	NEFH	Nefh	1	1	PS118220	Charcot-Marie-Tooth disease	0	0
616948	Spinocerebellar Ataxia, Autosomal Recessive 22	614884	VWA3B	Vwa3b	1	1	PS213200	Spinocerebellar ataxia, autosomal recessive	0	0			['capillary endothelial cell', 'myelinating Schwann cell']
616949	Spinocerebellar Ataxia, Autosomal Recessive 23	605764	TDP2	Tdp2	1	1	PS213200	Spinocerebellar ataxia, autosomal recessive	1	1			['capillary endothelial cell', 'myelinating Schwann cell']
616954	You-hoover-fong Syndrome	611140	TELO2	Telo2	1	1			0	0
616973	Mental Retardation, Autosomal Dominant 42	139380	GNB1	Gnb1	1	1	PS156200	Mental retardation, autosomal dominant	1	1
616974	Combined Oxidative Phosphorylation Deficiency 30	615423	TRMT10C	Trmt10c	1	1	PS609060	Combined oxidative phosphorylation deficiency	1	0		['fast muscle cell', 'slow muscle cell']	['striated muscle cell', 'myelinating Schwann cell']
616975	Neurodevelopmental Disorder With Or Without Anomalies Of The Brain, Eye, Or Heart	605226	RERE	Rere	1	1			1	1
616977	Mental Retardation, Autosomal Dominant 43	143054	HIVEP2	Hivep2	1	1	PS156200	Mental retardation, autosomal dominant	1	1
616981	Epileptic Encephalopathy, Early Infantile, 37	604574	FRRS1L	Frrs1l	1	1	PS308350	Developmental and epileptic encephalopathy	0	0
617008	Cerebral Palsy, Spastic Quadriplegic, 3	601568	ADD3	Add3	1	1	PS603513	Spastic quadriplegic cerebral palsy	1	1
617011	Macrocephaly, Dysmorphic Facies, And Psychomotor Retardation	605109	HERC1	Herc1	1	1			1	1		['t cell']
617013	Hypermanganesemia With Dystonia 2	608736	SLC39A14	Slc39a14	1	1	PS613280	Hypermanganesemia with dystonia	1	1			['skeletal muscle satellite cell']
617017	Charcot-marie-tooth Disease, Axonal, Type 2t	120520	MME	Mme	1	1	PS118220	Charcot-Marie-Tooth disease	1	1
617018	Spinocerebellar Ataxia 43	120520	MME	Mme	1	1	PS164400	Spinocerebellar ataxia	1	1			['smooth muscle cell']
617020	Epileptic Encephalopathy, Early Infantile, 38	611647	ARV1	Arv1	1	1	PS308350	Developmental and epileptic encephalopathy	1	0
617022	Lethal Congenital Contracture Syndrome 10	609798	NEK9	Nek9	1	1	PS253310	Lethal congenital contracture syndrome	1	1
617026	Pontocerebellar Hypoplasia, Type 2f	608756	TSEN15	Tsen15	1	1	PS607596	Pontocerebellar hypoplasia	1	1
617030	Myopathy, Distal, 5	612498	ADSS1	Adssl1	1	1			0	1
617044	Short Stature, Developmental Delay, And Congenital Heart Defects	606781	TKT	Tkt	1	1			1	1
617046	Spastic Paraplegia 77, Autosomal Recessive	611592	FARS2	Fars2	1	1	PS303350	Spastic paraplegia	1	1
617050	Hermansky-pudlak Syndrome 10	607246	AP3D1	Ap3d1	1	1	PS203300	Hermansky-Pudlak syndrome	1	1
617051	Mental Retardation, Autosomal Recessive 55	616283	PUS3	Pus3	1	1			1	1
617054	Striatonigral Degeneration, Childhood-onset	604632	VAC14	Vac14	1	1	PS271930	Striatonigral degeneration	0	1
617055	Crisponi/cold-induced Sweating Syndrome 3	611119	KLHL7	Klhl7	1	1	PS272430	Cold-induced sweating syndrome	1	1			['skeletal muscle satellite cell']
617062	Okur-chung Neurodevelopmental Syndrome	115440	CSNK2A1	Csnk2a1	1	1			1	1
617065	Epileptic Encephalopathy, Early Infantile, 40	617064	GUF1	Guf1	1	1	PS308350	Developmental and epileptic encephalopathy	0	0
617066	Muscular Dystrophy, Congenital, Davignon-chauveau Type	604501	TRIP4	Trip4	1	1			1	1
617069	Progressive External Ophthalmoplegia With Mitochondrial Dna Deletions, Autosomal Recessive 3	188250	TK2	Tk2	1	1	PS157640	Progressive external ophthalmoplegia with mtDNA deletions	1	1
617070	Progressive External Ophthalmoplegia With Mitochondrial Dna Deletions, Autosomal Recessive 4	601465	DGUOK	Dguok	1	1	PS157640	Progressive external ophthalmoplegia with mtDNA deletions	1	1
617072	Muscular Dystrophy, Limb-girdle, Type 2y	614512	TOR1AIP1	Tor1aip1	1	1	PS253600	Muscular dystrophy, limb-girdle, autosomal recessive	1	1
617082	Congenital Disorder Of Glycosylation, Type Iaa	610463	NUS1	Nus1	1	1	PS212065	Congenital disorders of glycosylation, type I	1	1
617086	Encephalopathy Due To Defective Mitochondrial And Peroxisomal Fission 2	614785	MFF		1	1	PS614388	Encephalopathy due to defective mitochondrial and peroxisomal fission	1	0
617087	Charcot-marie-tooth Disease, Axonal, Autosomal Recessive, Type 2a2b	608507	MFN2	Mfn2	1	1	PS118220	Charcot-Marie-Tooth disease	1	1
617090	Microcephaly 17, Primary, Autosomal Recessive	605629	CIT	Cit	1	1	PS251200	Microcephaly, primary autosomal recessive	0	0		['t cell']
617093	Growth Retardation, Intellectual Developmental Disorder, Hypotonia, And Hepatopathy	600709	IARS1	Iars	1	1			0	1
617105	Epileptic Encephalopathy, Early Infantile, 41	600300	SLC1A2	Slc1a2	1	1	PS308350	Developmental and epileptic encephalopathy	0	0
617106	Epileptic Encephalopathy, Early Infantile, 42	601011	CACNA1A	Cacna1a	1	1	PS308350	Developmental and epileptic encephalopathy	1	0
617107	Thauvin-robinet-faivre Syndrome	608296	FIBP	Fibp	1	1			1	1
617113	Epileptic Encephalopathy, Early Infantile, 43	137192	GABRB3	Gabrb3	1	1	PS308350	Developmental and epileptic encephalopathy	0	0
617114	Myopathy, Myofibrillar, 7	605739	KY	Ky	1	1	PS601419	Myopathy, myofibrillar	0	0	Yes	['fast muscle cell', 'slow muscle cell']	['striated muscle cell']
617120	Joubert Syndrome 27	614144	B9D1	B9d1	1	1	PS213300	Joubert syndrome	0	1			['smooth muscle cell']
617121	Joubert Syndrome 28	609883	MKS1	Mks1	1	1	PS213300	Joubert syndrome	0	0			['smooth muscle cell']
617126	Alazami-yuan Syndrome	602955	TAF6	Taf6	1	1			1	0
617132	Epileptic Encephalopathy, Early Infantile, 44	610552	UBA5	Uba5	1	1	PS308350	Developmental and epileptic encephalopathy	1	1
617133	Spinocerebellar Ataxia, Autosomal Recessive 24	610552	UBA5	Uba5	1	1	PS213200	Spinocerebellar ataxia, autosomal recessive	1	1			['capillary endothelial cell', 'myelinating Schwann cell']
617137	Frontometaphyseal Dysplasia 2	602614	MAP3K7		1	1	PS305620	Frontometaphyseal dysplasia	1	0
617140	Zttk Syndrome	182465	SON	Son	1	1			1	1
617143	Myasthenic Syndrome, Congenital, 20, Presynaptic	608761	SLC5A7	Slc5a7	1	1	PS601462	Myasthenic syndrome, congenital	0	0	Yes
617146	Arthrogryposis, Distal, With Impaired Proprioception And Touch	613629	PIEZO2	Piezo2	1	1			1	0		['endothelial cell of lymphatic vessel']
617153	Epileptic Encephalopathy, Early Infantile, 45	137190	GABRB1	Gabrb1	1	1	PS308350	Developmental and epileptic encephalopathy	0	0
617157	Short Stature, Brachydactyly, Intellectual Developmental Disability, And Seizures	610087	PRMT7	Prmt7	1	1			0	1
617158	Myopathy, Distal, With Rimmed Vacuoles	601530	SQSTM1	Sqstm1	1	1			1	1
617159	Sifrim-hitz-weiss Syndrome	603277	CHD4	Chd4	1	1			1	1
617162	Epileptic Encephalopathy, Early Infantile, 46	602717	GRIN2D	Grin2d	1	1	PS308350	Developmental and epileptic encephalopathy	0	0
617166	Epileptic Encephalopathy, Early Infantile, 47	601513	FGF12	Fgf12	1	1	PS308350	Developmental and epileptic encephalopathy	1	0
617171	Dyskinesia, Seizures, And Intellectual Developmental Disorder	602635	DEAF1	Deaf1	1	1			1	1
617173	Intellectual Developmental Disorder With Cardiac Arrhythmia	604447	GNB5	Gnb5	1	1			1	1
617180	Chitayat Syndrome	611888	ERF	Erf	1	1			1	1
617182	Language Delay And Attention Deficit-hyperactivity Disorder/cognitive Impairment With Or Without Cardiac Arrhythmia	604447	GNB5	Gnb5	1	1			1	1
617183	Harel-yoon Syndrome	612316	ATAD3A	Atad3a	1	1			1	1
617184	Mitochondrial Dna Depletion Syndrome 12a (cardiomyopathic Type), Autosomal Dominant	103220	SLC25A4	Slc25a4	1	1	PS603041	Mitochondrial DNA depletion syndrome	1	1	Yes
617186	Encephalopathy, Progressive, Early-onset, With Brain Edema And/or Leukoencephalopathy	608862	NAXE	Naxe	1	1	PS617186	Encephalopathy, progressive, early-onset, with brain edema and/or leukoencephalopathy	1	0
617188	Mental Retardation, Autosomal Recessive 57	606048	MBOAT7	Mboat7	1	1	PS249500	Mental retardation, autosomal recessive	1	1
617190	Shashi-pena Syndrome	612991	ASXL2	Asxl2	1	1			1	1		['t cell']
617193	Encephalopathy, Progressive, Early-onset, With Brain Atrophy And Thin Corpus Callosum	604649	TBCD	Tbcd	1	1			1	0
617201	Periventricular Nodular Heterotopia 7	606384	NEDD4L	Nedd4l	1	1	PS300049	Periventricular nodular heterotopia	1	1
617207	Encephalopathy, Progressive, With Amyotrophy And Optic Atrophy	604934	TBCE	Tbce	1	1			1	0
617222	Sudden Cardiac Failure, Infantile	609988	PPA2	Ppa2	1	1			1	1
617225	Spastic Paraplegia 78, Autosomal Recessive	610513	ATP13A2	Atp13a2	1	1	PS303350	Spastic paraplegia	1	1
617228	Combined Oxidative Phosphorylation Deficiency 31	602241	MIPEP	Mipep	1	1	PS609060	Combined oxidative phosphorylation deficiency	0	1		['fast muscle cell', 'slow muscle cell']	['striated muscle cell', 'myelinating Schwann cell']
617232	Muscular Dystrophy, Limb-girdle, Type 2z	615618	POGLUT1	Poglut1	1	1	PS253600	Muscular dystrophy, limb-girdle, autosomal recessive	1	1
617235	Myoclonus, Intractable, Neonatal	602821	KIF5A	Kif5a	1	1			0	0
617237	Immunodeficiency 49	606558	BCL11B	Bcl11b	1	1	PS300755	Immunodeficiency (Select Examples)	1	1		['cd4-positive, alpha-beta t cell', 't cell']	['T-helper 17 cell']
617239	Myasthenic Syndrome, Congenital, 21, Presynaptic	600336	SLC18A3	Slc18a3	1	1	PS601462	Myasthenic syndrome, congenital	0	0	Yes
617241	Lung Disease, Immunodeficiency, And Chromosome Breakage Syndrome	608243	NSMCE3	Nsmce3	1	1			1	0
617248	3-methylglutaconic Aciduria, Type Viii	606441	HTRA2	Htra2	1	1	PS250950	3-Methylglutaconic aciduria	1	1
617255	Lissencephaly 8	617218	TMTC3	Tmtc3	1	1	PS607432	Lissencephaly	1	1			['stromal cell', 'myelinating Schwann cell']
617258	Myopathy, Myofibrillar, 8	617220	PYROXD1	Pyroxd1	1	1	PS601419	Myopathy, myofibrillar	1	0	Yes	['fast muscle cell', 'slow muscle cell']	['striated muscle cell']
617260	Global Developmental Delay, Absent Or Hypoplastic Corpus Callosum, And Dysmorphic Facies	601897	ZNF148	Zfp148	1	1			1	1
617268	Neurodevelopmental Disorder With Hypotonia, Seizures, And Absent Language	617245	HECW2	Hecw2	1	1			1	1		['capillary endothelial cell']
617270	Mental Retardation, Autosomal Recessive 58	616054	ELP2	Elp2	1	1	PS249500	Mental retardation, autosomal recessive	1	1
617276	Epileptic Encephalopathy, Early Infantile, 48	602166	AP3B2	Ap3b2	1	1	PS308350	Developmental and epileptic encephalopathy	0	0
617281	Epileptic Encephalopathy, Early Infantile, 49	617278	DENND5A	Dennd5a	1	1	PS308350	Developmental and epileptic encephalopathy	1	1
617282	Dystonia, Childhood-onset, With Optic Atrophy And Basal Ganglia Abnormalities	608205	MECR	Mecr	1	1	PS128100	Dystonia	1	0
617284	Dystonia 28, Childhood-onset	606834	KMT2B	Kmt2b	1	1	PS128100	Dystonia	1	0
617290	Epilepsy, Early-onset, Vitamin B6-dependent	604436	PLPBP	Plpbp	1	1			1	0
617296	Spastic Paraplegia, Intellectual Disability, Nystagmus, And Obesity	615759	KIDINS220	Kidins220	1	1			1	1
617301	Glycine Encephalopathy With Normal Serum Glycine	601019	SLC6A9	Slc6a9	1	1			0	1
617302	Optic Atrophy 11	607472	YME1L1	Yme1l1	1	1	PS165500	Optic atrophy	1	1
617303	Mucopolysaccharidosis-plus Syndrome	610034	VPS33A	Vps33a	1	1			1	1
617306	Coloboma, Osteopetrosis, Microphthalmia, Macrocephaly, Albinism, And Deafness	156845	MITF	Mitf	1	1			1	1
617330	Hypotonia, Ataxia, And Delayed Development Syndrome	607407	EBF3	Ebf3	1	1			1	1
617333	Intellectual Developmental Disorder With Dysmorphic Facies And Ptosis	602410	BRPF1	Brpf1	1	1			1	0		['mast cell']
617336	Nemaline Myopathy 11, Autosomal Recessive	608517	MYPN	Mypn	1	1	PS161800	Nemaline myopathy	1	1	Yes	['fast muscle cell', 'slow muscle cell']	['striated muscle cell']
617339	Epileptic Encephalopathy, Early Infantile, 51	154100	MDH2	Mdh2	1	1	PS308350	Developmental and epileptic encephalopathy	1	1
617341	Cerebroretinal Microangiopathy With Calcifications And Cysts 2	613128	STN1	Stn1	1	1	PS612199	Cerebroretinal microangiopathy with calcfications and cysts	1	0
617350	Epileptic Encephalopathy, Early Infantile, 52	600235	SCN1B	Scn1b	1	1	PS308350	Developmental and epileptic encephalopathy	1	1
617352	Mulchandani-bhoj-conlin Syndrome	617352	MBCS		1	1			0	0
617360	Congenital Heart Defects, Dysmorphic Facial Features, And Intellectual Developmental Disorder	603309	CDK13	Cdk13	1	1			1	1
617364	Congenital Heart Defects And Ectodermal Dysplasia	605435	PRKD1	Prkd1	1	1			1	1
617370	Peroxisome Biogenesis Disorder 10b	603164	PEX3	Pex3	1	1	PS214100	Peroxisome biogenesis disorder	1	1			['smooth muscle cell']
617384	Hyperphenylalaninemia, Mild, Non-bh4-deficient	606060	DNAJC12	Dnajc12	1	1			1	1
617389	Epileptic Encephalopathy, Early Infantile, 53	604297	SYNJ1	Synj1	1	1	PS308350	Developmental and epileptic encephalopathy	1	1
617391	Epileptic Encephalopathy, Early Infantile, 54	602869	HNRNPU	Hnrnpu	1	1	PS308350	Developmental and epileptic encephalopathy	1	1
617393	Neurodevelopmental Disorder With Epilepsy, Cataracts, Feeding Difficulties, And Delayed Brain Myelination	610672	NACC1	Nacc1	1	1			1	1
617395	Congenital Disorder Of Glycosylation, Type Iiq	606974	COG2	Cog2	1	1	PS212066	Congenital disorders of glycosylation, type II	1	0
617396	Anauxetic Dysplasia 2	602486	POP1	Pop1	1	1	PS607095	Anauxetic dysplasia	0	0
617397	Pseudo-torch Syndrome 2	607057	USP18	Usp18	1	1	PS251290	Pseudo-TORCH syndrome	1	1
617402	Cutis Laxa, Autosomal Recessive, Type Iic	108746	ATP6V1E1	Atp6v1e1	1	1	PS123700	Cutis laxa	1	1
617403	Cutis Laxa, Autosomal Recessive, Type Iid	607027	ATP6V1A	Atp6v1a	1	1	PS123700	Cutis laxa	1	1
617404	Muscular Dystrophy, Congenital, With Cataracts And Intellectual Disability	607875	INPP5K	Inpp5k	1	1			1	1
617412	Macinnes Syndrome	603683	RPS23	Rps23	1	1			1	1
617425	Immunoskeletal Dysplasia With Neurodevelopmental Abnormalities	605744	EXTL3	Extl3	1	1			1	1
617435	Lopes-maciel-rodan Syndrome	613004	HTT	Htt	1	1			1	0
617450	Intellectual Developmental Disorder With Gastrointestinal Difficulties And High Pain Threshold	605100	PPM1D	Ppm1d	1	1			1	1
617452	Intellectual Developmental Disorder With Dysmorphic Facies, Seizures, And Distal Limb Anomalies	612021	OTUD6B	Otud6b	1	1			1	1
617468	Arthrogryposis Multiplex Congenita, Neurogenic, With Myelin Defect	608303	LGI4	Lgi4	1	1	PS617468	Arthrogryposis multiplex congenita	1	1
617478	Structural Heart Defects And Renal Anomalies Syndrome	617449	TMEM260	Tmem260	1	1			1	0
617481	Neurodevelopmental Disorder With Microcephaly, Hypotonia, And Variable Brain Anomalies	617413	PRUNE1	Prune1	1	1			0	0
617493	Neurodevelopmental Disorder With Involuntary Movements	139311	GNAO1	Gnao1	1	1			0	0
617506	Noonan Syndrome-like Disorder With Loose Anagen Hair 2	600590	PPP1CB	Ppp1cb	1	1	PS163950	Noonan syndrome	1	1		['mast cell']
617506	Noonan Syndrome-like Disorder With Loose Anagen Hair 2	600590	PPP1CB	Ppp1cb	1	1	PS607721	Noonan syndrome-like disorder with loose anagen hair	1	1
617507	Peho-like Syndrome	609736	CCDC88A	Ccdc88a	1	1			1	1
617516	Stankiewicz-isidor Syndrome	604450	PSMD12	Psmd12	1	1			1	1
617519	Myopathy, Congenital, With Neuropathy And Deafness	606214	SPTBN4	Sptbn4	1	1			0	0
617523	Neurodevelopmental Disorder With Midbrain And Hindbrain Malformations	607560	ARHGEF2	Arhgef2	1	1			1	1
617527	Neurodevelopmental Disorder With Progressive Microcephaly, Spasticity, And Brain Anomalies	603873	PLAA	Plaa	1	1			1	1
617532	Intellectual Developmental Disorder With Neuropsychiatric Features	605763	SLC45A1	Slc45a1	1	1			0	0
617537	Rahman Syndrome	142220	H1-4		1	1			0	0
617542	Gaze Palsy, Familial Horizontal, With Progressive Scoliosis, 2	120470	DCC	Dcc	1	1	PS607313	Gaze palsy, familial horizontal, with progressive scoliosis	0	0
617560	Spastic Ataxia 8, Autosomal Recessive, With Hypomyelinating Leukodystrophy	605955	NKX6-2	Nkx6-2	1	1	PS108600	Spastic ataxia	0	0		['skeletal muscle satellite stem cell']
617561	Cohen-gibson Syndrome	605984	EED	Eed	1	1			1	1		['t cell']
617562	Meckel Syndrome 13	616183	TMEM107	Tmem107	1	1	PS213300	Joubert syndrome	1	1			['smooth muscle cell']
617562	Meckel Syndrome 13	616183	TMEM107	Tmem107	1	1	PS249000	Meckel syndrome	1	1
617563	Orofaciodigital Syndrome Xvi	616183	TMEM107	Tmem107	1	1	PS311200	Orofaciodigital syndrome	1	1
617575	Nephrotic Syndrome, Type 14	603729	SGPL1	Sgpl1	1	1	PS256300	Nephrotic syndrome	1	1
617591	Proteasome-associated Autoinflammatory Syndrome 3	602177	PSMB4	Psmb4	1	1	PS256040	Proteosome-associated autoinflammatory syndrome	1	1			['monocyte-derived dendritic cell']
617591	Proteasome-associated Autoinflammatory Syndrome 3	177045	PSMB9	Psmb9	1	1	PS256040	Proteosome-associated autoinflammatory syndrome	1	1			['monocyte-derived dendritic cell']
617595	Birk-landau-perez Syndrome	604604	SLC30A9	Slc30a9	1	1			1	1
617599	Epileptic Encephalopathy, Early Infantile, 55	605938	PIGP	Pigp	1	1	PS308350	Developmental and epileptic encephalopathy	1	1
617600	Mental Retardation, Autosomal Dominant 45	612082	CIC	Cic	1	1	PS156200	Mental retardation, autosomal dominant	1	1
617601	Mental Retardation, Autosomal Dominant 46	607357	KCNQ5	Kcnq5	1	1	PS156200	Mental retardation, autosomal dominant	1	0
617602	Congenital Heart Defects And Skeletal Malformations Syndrome	189980	ABL1	Abl1	1	1			1	1
617613	Multiple Mitochondrial Dysfunctions Syndrome 5	611006	ISCA1	Isca1	1	1	PS605711	Multiple mitochondrial dysfunctions syndrome	1	1		['fast muscle cell', 'slow muscle cell']	['striated muscle cell', 'pericyte cell']
617616	Skraban-deardorff Syndrome	617424	WDR26	Wdr26	1	1			1	1
617622	Joubert Syndrome 30	617612	ARMC9	Armc9	1	1	PS213300	Joubert syndrome	0	0			['smooth muscle cell']
617633	Spinocerebellar Ataxia, Autosomal Recessive 26	194360	XRCC1	Xrcc1	1	1	PS213200	Spinocerebellar ataxia, autosomal recessive	1	1			['capillary endothelial cell', 'myelinating Schwann cell']
617635	Mental Retardation, Autosomal Dominant 47	604358	STAG1	Stag1	1	1	PS156200	Mental retardation, autosomal dominant	1	1
617641	Congenital Anomalies Of Kidney And Urinary Tract Syndrome With Or Without Hearing Loss, Abnormal Ears, Or Developmental Delay	176310	PBX1	Pbx1	1	1			1	1
617643	Cerebellar Atrophy, Developmental Delay, And Seizures	600150	KCNMA1	Kcnma1	1	1			1	1			['tendon cell']
617664	Combined Oxidative Phosphorylation Deficiency 32	611994	MRPS34	Mrps34	1	1	PS609060	Combined oxidative phosphorylation deficiency	1	1		['fast muscle cell', 'slow muscle cell']	['striated muscle cell', 'myelinating Schwann cell']
617668	Encephalopathy, Neonatal Severe, With Lactic Acidosis And Brain Abnormalities	617659	LIPT2	Lipt2	1	1			0	0
617669	Encephalopathy, Progressive, Early-onset, With Brain Atrophy And Spasticity	614139	TRAPPC12	Trappc12	1	1			1	0
617672	Neurodegeneration, Childhood-onset, With Brain Atrophy	600673	UBTF	Ubtf	1	1			1	1
617675	Myopathy, Mitochondrial, And Ataxia	617619	MSTO1	Msto1	1	1			0	0
617682	Pilarowski-bjornsson Syndrome	602118	CHD1	Chd1	1	1			1	1
617691	Spinocerebellar Ataxia 44	604473	GRM1	Grm1	1	1	PS164400	Spinocerebellar ataxia	0	0			['smooth muscle cell']
617694	Al Kaissi Syndrome	603464	CDK10	Cdk10	1	1			1	1
617695	Pontocerebellar Hypoplasia, Type 11	617687	TBC1D23	Tbc1d23	1	1	PS607596	Pontocerebellar hypoplasia	1	1
617698	3-methylglutaconic Aciduria, Type Ix	607381	TIMM50	Timm50	1	1	PS250950	3-Methylglutaconic aciduria	1	1
617709	Neurodevelopmental Disorder With Microcephaly, Ataxia, And Seizures	607529	SARS1	Sars	1	1			0	1
617710	Neurodevelopmental Disorder, Mitochondrial, With Abnormal Movements And Lactic Acidosis, With Or Without Seizures	604733	WARS2	Wars2	1	1			1	0
617711	Epileptic Encephalopathy, Infantile Or Early Childhood, 1	114105	PPP3CA	Ppp3ca	1	1	PS308350	Developmental and epileptic encephalopathy	1	1
617713	Combined Oxidative Phosphorylation Deficiency 33	601269	C1QBP	C1qbp	1	1	PS609060	Combined oxidative phosphorylation deficiency	1	1		['fast muscle cell', 'slow muscle cell']	['striated muscle cell', 'myelinating Schwann cell']
617721	Neuronopathy, Distal Hereditary Motor, Type Ix	191050	WARS1	Wars	1	1			0	1
617729	Galloway-mowat Syndrome 3	610107	OSGEP	Osgep	1	1	PS251300	Galloway-Mowat syndrome	1	1
617730	Galloway-mowat Syndrome 4	608679	TP53RK	Trp53rkb	1	1	PS251300	Galloway-Mowat syndrome	1	0
617730	Galloway-mowat Syndrome 4	608679	TP53RK	Trp53rka	1	1	PS251300	Galloway-Mowat syndrome	1	0
617731	Galloway-mowat Syndrome 5	608680	TPRKB	Tprkb	1	1	PS251300	Galloway-Mowat syndrome	1	1
617732	Facial Palsy, Congenital, With Ptosis And Velopharyngeal Dysfunction	615103	TUBB6	Tubb6	1	1			1	1
617751	Mental Retardation, Autosomal Dominant 48	602048	RAC1	Rac1	1	1	PS156200	Mental retardation, autosomal dominant	1	1
617752	Mental Retardation, Autosomal Dominant 49	604506	TRIP12	Trip12	1	1			1	1
[truncated: 376 more rows]

## Sheet: Spleen
Supplementary File 1D. Diseases, disease genes, and likely-affected cell types of spleen.
[truncated: 295 more rows]

[truncated: 2 more sheets: Tongue, Trachea]
