# Supplementary material for: Affected cell types for hundreds of Mendelian diseases revealed by analysis of human and mouse single-cell data
Source: eLife. 2024 Jan 10;13:e84613. doi: 10.7554/eLife.84613 (PMC10830129; doi:10.7554/eLife.84613)
Supplement: Supplementary file 2. [file elife-84613-supp2.xlsx]

## Sheet: Supplementary File 2
Supplementary File 2. Diseases and their PrEDiCT scores across human cell types per tissue.
Summary of numbers of disease–cell-type pairs appear in 2A.
Data per tissue appear in distinct tabs, as follows: 2B Bone marrow, 2C Lung, 2D Skeletal muscle, 2E Spleen, 2F Tongue, and 2G Trachea.

## Sheet: Summary
Supplementary File 2A. Summary of numbers of diseases, cell types, and disease-cell-type pairs.
Tissue	Diseases	Human cell types	Disease–cell-type pairs	Likely affected disease–cell-type pairs	Literature-supported disease–cell-type pairs	Expert-curated disease–cell-type pairs
Bone marrow	313	16	5008	115	69	2
Lung	198	38	7524	87	90	2
Skeletal muscle	855	19	16245	205	38	0
Spleen	155	24	3720	57	21	2
Tongue	91	12	1092	20	8	0
Trachea	33	20	660	5	3	0

## Sheet: Bone marrow
Supplementary File 2B. Diseases and their PrEDiCT scores across cell types in bone marrow.
Disease\Phenotypic series accession (OMIM)	Disease name (OMIM)	Cell type name	PrEDiCT score	Number of causal genes	P value	FDR	Cell type likely affected by disease (1=Yes, 0=No)	Literature co-appearance (1=Yes, 0=No)	Expert curation (1=Affected, 0=Unaffected, NA=Undetermined)
102700	Severe Combined Immunodeficiency, Autosomal Recessive, T Cell-negative,b Cell-negative, Nk Cell-negative, Due To Adenosine Deaminase Deficiency	cd4-positive, alpha-beta t cell	0.427377	1	0.154	0.528	0	0
102700	Severe Combined Immunodeficiency, Autosomal Recessive, T Cell-negative,b Cell-negative, Nk Cell-negative, Due To Adenosine Deaminase Deficiency	cd8-positive, alpha-beta t cell	1.05946	1	0.101	0.528	0	0
102700	Severe Combined Immunodeficiency, Autosomal Recessive, T Cell-negative,b Cell-negative, Nk Cell-negative, Due To Adenosine Deaminase Deficiency	cd24 neutrophil	-0.930506	1	0.882	0.9408	0	0
102700	Severe Combined Immunodeficiency, Autosomal Recessive, T Cell-negative,b Cell-negative, Nk Cell-negative, Due To Adenosine Deaminase Deficiency	erythrocyte	-0.964527	1	0.7	0.9408	0	0
102700	Severe Combined Immunodeficiency, Autosomal Recessive, T Cell-negative,b Cell-negative, Nk Cell-negative, Due To Adenosine Deaminase Deficiency	erythroid progenitor	-0.101995	1	0.696	0.9408	0	0
102700	Severe Combined Immunodeficiency, Autosomal Recessive, T Cell-negative,b Cell-negative, Nk Cell-negative, Due To Adenosine Deaminase Deficiency	granulocyte	0.0560482	1	0.272	0.717714	0	0
102700	Severe Combined Immunodeficiency, Autosomal Recessive, T Cell-negative,b Cell-negative, Nk Cell-negative, Due To Adenosine Deaminase Deficiency	hematopoietic stem cell	2.18778	1	0.017	0.272	0	0
102700	Severe Combined Immunodeficiency, Autosomal Recessive, T Cell-negative,b Cell-negative, Nk Cell-negative, Due To Adenosine Deaminase Deficiency	macrophage	0.250159	1	0.165	0.528	0	0
102700	Severe Combined Immunodeficiency, Autosomal Recessive, T Cell-negative,b Cell-negative, Nk Cell-negative, Due To Adenosine Deaminase Deficiency	memory b cell	-0.478558	1	0.858	0.9408	0	0
102700	Severe Combined Immunodeficiency, Autosomal Recessive, T Cell-negative,b Cell-negative, Nk Cell-negative, Due To Adenosine Deaminase Deficiency	monocyte	-0.284362	1	0.813	0.9408	0	0
102700	Severe Combined Immunodeficiency, Autosomal Recessive, T Cell-negative,b Cell-negative, Nk Cell-negative, Due To Adenosine Deaminase Deficiency	myeloid progenitor	0.0963723	1	0.314	0.717714	0	0
102700	Severe Combined Immunodeficiency, Autosomal Recessive, T Cell-negative,b Cell-negative, Nk Cell-negative, Due To Adenosine Deaminase Deficiency	naive b cell	-0.964527	1	0.977	0.977	0	0
102700	Severe Combined Immunodeficiency, Autosomal Recessive, T Cell-negative,b Cell-negative, Nk Cell-negative, Due To Adenosine Deaminase Deficiency	nampt neutrophil	-0.964527	1	0.81	0.9408	0	0
102700	Severe Combined Immunodeficiency, Autosomal Recessive, T Cell-negative,b Cell-negative, Nk Cell-negative, Due To Adenosine Deaminase Deficiency	neutrophil	-0.964527	1	0.784	0.9408	0	0
102700	Severe Combined Immunodeficiency, Autosomal Recessive, T Cell-negative,b Cell-negative, Nk Cell-negative, Due To Adenosine Deaminase Deficiency	nk cell	1.94655	1	0.05	0.4	0	0
102700	Severe Combined Immunodeficiency, Autosomal Recessive, T Cell-negative,b Cell-negative, Nk Cell-negative, Due To Adenosine Deaminase Deficiency	plasma cell	-0.370217	1	0.524	0.9408	0	0
102900	Adenosine Triphosphate, Elevated, Of Erythrocytes	cd4-positive, alpha-beta t cell	-0.332537	1	0.809	0.892	0	0
102900	Adenosine Triphosphate, Elevated, Of Erythrocytes	cd8-positive, alpha-beta t cell	-0.321645	1	0.835	0.892	0	0
102900	Adenosine Triphosphate, Elevated, Of Erythrocytes	cd24 neutrophil	-0.335536	1	0.682	0.892	0	0
102900	Adenosine Triphosphate, Elevated, Of Erythrocytes	erythrocyte	-0.231228	1	0.499	0.892	0	1
102900	Adenosine Triphosphate, Elevated, Of Erythrocytes	erythroid progenitor	3.62447	1	0	0	1	0
102900	Adenosine Triphosphate, Elevated, Of Erythrocytes	granulocyte	-0.336973	1	0.838	0.892	0	0
102900	Adenosine Triphosphate, Elevated, Of Erythrocytes	hematopoietic stem cell	-0.313074	1	0.791	0.892	0	0
102900	Adenosine Triphosphate, Elevated, Of Erythrocytes	macrophage	-0.337577	1	0.722	0.892	0	0
102900	Adenosine Triphosphate, Elevated, Of Erythrocytes	memory b cell	-0.249912	1	0.734	0.892	0	0
102900	Adenosine Triphosphate, Elevated, Of Erythrocytes	monocyte	-0.311536	1	0.838	0.892	0	0
102900	Adenosine Triphosphate, Elevated, Of Erythrocytes	myeloid progenitor	0.710024	1	0.205	0.892	0	0
102900	Adenosine Triphosphate, Elevated, Of Erythrocytes	naive b cell	-0.257128	1	0.717	0.892	0	0
102900	Adenosine Triphosphate, Elevated, Of Erythrocytes	nampt neutrophil	-0.321708	1	0.611	0.892	0	0
102900	Adenosine Triphosphate, Elevated, Of Erythrocytes	neutrophil	-0.337577	1	0.621	0.892	0	0
102900	Adenosine Triphosphate, Elevated, Of Erythrocytes	nk cell	-0.337577	1	0.892	0.892	0	0
102900	Adenosine Triphosphate, Elevated, Of Erythrocytes	plasma cell	-0.310492	1	0.5	0.892	0	0
PS105650	Diamond-Blackfan anemia	cd4-positive, alpha-beta t cell	1.12518	19	0	0	1	0
PS105650	Diamond-Blackfan anemia	cd8-positive, alpha-beta t cell	0.338409	19	0.014	0.0248889	0	0
PS105650	Diamond-Blackfan anemia	cd24 neutrophil	-1.25506	19	1	1	0	0
PS105650	Diamond-Blackfan anemia	erythrocyte	-1.27496	19	1	1	0	0
PS105650	Diamond-Blackfan anemia	erythroid progenitor	0.808779	19	0	0	0	1
PS105650	Diamond-Blackfan anemia	granulocyte	0.18373	19	0.006	0.012	0	0
PS105650	Diamond-Blackfan anemia	hematopoietic stem cell	1.12076	19	0	0	1	0
PS105650	Diamond-Blackfan anemia	macrophage	0.229251	19	0	0	0	0
PS105650	Diamond-Blackfan anemia	memory b cell	0.937671	19	0	0	0	0
PS105650	Diamond-Blackfan anemia	monocyte	-0.215893	19	0.996	1	0	0
PS105650	Diamond-Blackfan anemia	myeloid progenitor	0.869453	19	0	0	0	0
PS105650	Diamond-Blackfan anemia	naive b cell	0.847014	19	0	0	0	0
PS105650	Diamond-Blackfan anemia	nampt neutrophil	-1.33916	19	1	1	0	0
PS105650	Diamond-Blackfan anemia	neutrophil	-1.33443	19	1	1	0	0
PS105650	Diamond-Blackfan anemia	nk cell	-0.320013	19	1	1	0	0
PS105650	Diamond-Blackfan anemia	plasma cell	-0.942298	19	1	1	0	0
112250	Diaphyseal Medullary Stenosis With Malignant Fibrous Histiocytoma	cd4-positive, alpha-beta t cell	0.0399276	1	0.264	0.528	0	0
112250	Diaphyseal Medullary Stenosis With Malignant Fibrous Histiocytoma	cd8-positive, alpha-beta t cell	-0.0185683	1	0.763	0.954667	0	0
112250	Diaphyseal Medullary Stenosis With Malignant Fibrous Histiocytoma	cd24 neutrophil	-1.16709	1	0.961	0.961	0	0
112250	Diaphyseal Medullary Stenosis With Malignant Fibrous Histiocytoma	erythrocyte	-1.05633	1	0.736	0.954667	0	0
112250	Diaphyseal Medullary Stenosis With Malignant Fibrous Histiocytoma	erythroid progenitor	0.744885	1	0.163	0.425143	0	0
112250	Diaphyseal Medullary Stenosis With Malignant Fibrous Histiocytoma	granulocyte	1.14719	1	0.077	0.425143	0	0
112250	Diaphyseal Medullary Stenosis With Malignant Fibrous Histiocytoma	hematopoietic stem cell	0.390325	1	0.186	0.425143	0	0
112250	Diaphyseal Medullary Stenosis With Malignant Fibrous Histiocytoma	macrophage	-0.462935	1	0.788	0.954667	0	0
112250	Diaphyseal Medullary Stenosis With Malignant Fibrous Histiocytoma	memory b cell	0.218469	1	0.185	0.425143	0	0
112250	Diaphyseal Medullary Stenosis With Malignant Fibrous Histiocytoma	monocyte	0.472206	1	0.1	0.425143	0	0
112250	Diaphyseal Medullary Stenosis With Malignant Fibrous Histiocytoma	myeloid progenitor	2.39686	1	0.014	0.224	0	0
112250	Diaphyseal Medullary Stenosis With Malignant Fibrous Histiocytoma	naive b cell	0.804993	1	0.108	0.425143	0	0
112250	Diaphyseal Medullary Stenosis With Malignant Fibrous Histiocytoma	nampt neutrophil	-1.23365	1	0.895	0.954667	0	0
112250	Diaphyseal Medullary Stenosis With Malignant Fibrous Histiocytoma	neutrophil	-1.08198	1	0.827	0.954667	0	0
112250	Diaphyseal Medullary Stenosis With Malignant Fibrous Histiocytoma	nk cell	-0.270689	1	0.867	0.954667	0	0
112250	Diaphyseal Medullary Stenosis With Malignant Fibrous Histiocytoma	plasma cell	-0.923625	1	0.762	0.954667	0	0
116920	Leukocyte Adhesion Deficiency, Type I	cd4-positive, alpha-beta t cell	-0.439142	1	0.84	0.995	0	0
116920	Leukocyte Adhesion Deficiency, Type I	cd8-positive, alpha-beta t cell	0.179649	1	0.302	0.604	0	0
116920	Leukocyte Adhesion Deficiency, Type I	cd24 neutrophil	0.730831	1	0.115	0.368	0	0
116920	Leukocyte Adhesion Deficiency, Type I	erythrocyte	-1.07771	1	0.753	0.995	0	0
116920	Leukocyte Adhesion Deficiency, Type I	erythroid progenitor	-1.05051	1	0.984	0.995	0	0
116920	Leukocyte Adhesion Deficiency, Type I	granulocyte	0.259047	1	0.229	0.523429	0	0
116920	Leukocyte Adhesion Deficiency, Type I	hematopoietic stem cell	-0.901818	1	0.995	0.995	0	0
116920	Leukocyte Adhesion Deficiency, Type I	macrophage	1.11194	1	0.058	0.368	0	0
116920	Leukocyte Adhesion Deficiency, Type I	memory b cell	-0.815429	1	0.985	0.995	0	0
116920	Leukocyte Adhesion Deficiency, Type I	monocyte	0.898592	1	0.054	0.368	0	0
116920	Leukocyte Adhesion Deficiency, Type I	myeloid progenitor	-1.02995	1	0.993	0.995	0	0
116920	Leukocyte Adhesion Deficiency, Type I	naive b cell	-0.834886	1	0.956	0.995	0	0
116920	Leukocyte Adhesion Deficiency, Type I	nampt neutrophil	1.48948	1	0.073	0.368	0	0
116920	Leukocyte Adhesion Deficiency, Type I	neutrophil	1.45122	1	0.093	0.368	0	0
116920	Leukocyte Adhesion Deficiency, Type I	nk cell	1.08759	1	0.157	0.418667	0	0
116920	Leukocyte Adhesion Deficiency, Type I	plasma cell	-1.0589	1	0.845	0.995	0	0
PS120100	Familial cold autoinflammatory syndrome	cd4-positive, alpha-beta t cell	-0.459956	2	0.952	0.997	0	0
PS120100	Familial cold autoinflammatory syndrome	cd8-positive, alpha-beta t cell	-0.553916	2	0.995	0.997	0	0
PS120100	Familial cold autoinflammatory syndrome	cd24 neutrophil	0.537807	2	0.135	0.36	0	0
PS120100	Familial cold autoinflammatory syndrome	erythrocyte	-0.601989	2	0.603	0.997	0	0
PS120100	Familial cold autoinflammatory syndrome	erythroid progenitor	-0.581989	2	0.958	0.997	0	0
PS120100	Familial cold autoinflammatory syndrome	granulocyte	0.580794	2	0.116	0.36	0	0
PS120100	Familial cold autoinflammatory syndrome	hematopoietic stem cell	-0.392811	2	0.945	0.997	0	0
PS120100	Familial cold autoinflammatory syndrome	macrophage	0.905219	2	0.055	0.248	0	0
PS120100	Familial cold autoinflammatory syndrome	memory b cell	-0.582652	2	0.972	0.997	0	0
PS120100	Familial cold autoinflammatory syndrome	monocyte	1.01222	2	0.02	0.16	0	0
PS120100	Familial cold autoinflammatory syndrome	myeloid progenitor	-0.537168	2	0.971	0.997	0	0
PS120100	Familial cold autoinflammatory syndrome	naive b cell	-0.601989	2	0.959	0.997	0	0
PS120100	Familial cold autoinflammatory syndrome	nampt neutrophil	1.45507	2	0.018	0.16	0	0
PS120100	Familial cold autoinflammatory syndrome	neutrophil	0.946494	2	0.062	0.248	0	0
PS120100	Familial cold autoinflammatory syndrome	nk cell	-0.530213	2	0.997	0.997	0	0
PS120100	Familial cold autoinflammatory syndrome	plasma cell	-0.594926	2	0.65	0.997	0	0
PS124900	Deafness, autosomal dominant	cd4-positive, alpha-beta t cell	-0.145205	1	0.698	0.974	0	0
PS124900	Deafness, autosomal dominant	cd8-positive, alpha-beta t cell	0.491215	1	0.213	0.486857	0	0
PS124900	Deafness, autosomal dominant	cd24 neutrophil	1.85849	1	0.044	0.486857	0	0
PS124900	Deafness, autosomal dominant	erythrocyte	-1.34	1	0.882	0.974	0	0
PS124900	Deafness, autosomal dominant	erythroid progenitor	-0.686566	1	0.885	0.974	0	0
PS124900	Deafness, autosomal dominant	granulocyte	0.401561	1	0.188	0.486857	0	0
PS124900	Deafness, autosomal dominant	hematopoietic stem cell	-0.722801	1	0.97	0.974	0	0
PS124900	Deafness, autosomal dominant	macrophage	-0.358813	1	0.757	0.974	0	0
PS124900	Deafness, autosomal dominant	memory b cell	-0.775369	1	0.964	0.974	0	0
PS124900	Deafness, autosomal dominant	monocyte	0.123846	1	0.206	0.486857	0	0
PS124900	Deafness, autosomal dominant	myeloid progenitor	-0.224752	1	0.758	0.974	0	0
PS124900	Deafness, autosomal dominant	naive b cell	-0.983123	1	0.974	0.974	0	0
PS124900	Deafness, autosomal dominant	nampt neutrophil	0.988948	1	0.113	0.486857	0	0
PS124900	Deafness, autosomal dominant	neutrophil	1.73671	1	0.078	0.486857	0	0
PS124900	Deafness, autosomal dominant	nk cell	0.938232	1	0.176	0.486857	0	0
PS124900	Deafness, autosomal dominant	plasma cell	-1.30238	1	0.92	0.974	0	0
PS127000	Kenny-Caffey syndrome	cd4-positive, alpha-beta t cell	-0.375973	1	0.841	0.891	0	0
PS127000	Kenny-Caffey syndrome	cd8-positive, alpha-beta t cell	0.358009	1	0.239	0.562286	0	0	0
PS127000	Kenny-Caffey syndrome	cd24 neutrophil	0.0991847	1	0.189	0.562286	0	0
PS127000	Kenny-Caffey syndrome	erythrocyte	-1.25597	1	0.823	0.891	0	0
PS127000	Kenny-Caffey syndrome	erythroid progenitor	-0.390495	1	0.795	0.891	0	0
PS127000	Kenny-Caffey syndrome	granulocyte	2.89708	1	0.003	0.048	1	0
PS127000	Kenny-Caffey syndrome	hematopoietic stem cell	-0.243926	1	0.769	0.891	0	0
PS127000	Kenny-Caffey syndrome	macrophage	-0.398376	1	0.772	0.891	0	0
PS127000	Kenny-Caffey syndrome	memory b cell	-0.506737	1	0.874	0.891	0	0
PS127000	Kenny-Caffey syndrome	monocyte	0.183185	1	0.185	0.562286	0	0
PS127000	Kenny-Caffey syndrome	myeloid progenitor	0.281044	1	0.246	0.562286	0	0
PS127000	Kenny-Caffey syndrome	naive b cell	0.0108493	1	0.241	0.562286	0	0
PS127000	Kenny-Caffey syndrome	nampt neutrophil	-0.741649	1	0.755	0.891	0	0
PS127000	Kenny-Caffey syndrome	neutrophil	-0.147391	1	0.625	0.891	0	0
PS127000	Kenny-Caffey syndrome	nk cell	1.42162	1	0.112	0.562286	0	0
PS127000	Kenny-Caffey syndrome	plasma cell	-1.19045	1	0.891	0.891	0	0
PS127550	Dyskeratosis congenita	cd4-positive, alpha-beta t cell	-0.127628	5	0.868	0.981	0	0
PS127550	Dyskeratosis congenita	cd8-positive, alpha-beta t cell	-0.224135	5	0.936	0.981	0	0
PS127550	Dyskeratosis congenita	cd24 neutrophil	-0.753855	5	0.949	0.981	0	0
PS127550	Dyskeratosis congenita	erythrocyte	-1.32081	5	0.981	0.981	0	0
PS127550	Dyskeratosis congenita	erythroid progenitor	0.913807	5	0.019	0.304	0	0
PS127550	Dyskeratosis congenita	granulocyte	-0.0216418	5	0.852	0.981	0	0
PS127550	Dyskeratosis congenita	hematopoietic stem cell	0.238375	5	0.096	0.384	0	0
PS127550	Dyskeratosis congenita	macrophage	0.0855448	5	0.057	0.384	0	0
PS127550	Dyskeratosis congenita	memory b cell	0.0791902	5	0.074	0.384	0	0
PS127550	Dyskeratosis congenita	monocyte	-0.157968	5	0.871	0.981	0	0
PS127550	Dyskeratosis congenita	myeloid progenitor	0.0889246	5	0.159	0.5088	0	0
PS127550	Dyskeratosis congenita	naive b cell	-0.208778	5	0.849	0.981	0	0
PS127550	Dyskeratosis congenita	nampt neutrophil	-0.855116	5	0.899	0.981	0	0
PS127550	Dyskeratosis congenita	neutrophil	-0.879947	5	0.93	0.981	0	0
PS127550	Dyskeratosis congenita	nk cell	-0.0850717	5	0.939	0.981	0	0
PS127550	Dyskeratosis congenita	plasma cell	-0.814036	5	0.895	0.981	0	0
PS130000	Ehlers-Danlos syndrome	cd4-positive, alpha-beta t cell	-0.383951	6	0.98	0.997	0	0
PS130000	Ehlers-Danlos syndrome	cd8-positive, alpha-beta t cell	-0.44109	6	0.997	0.997	0	0
PS130000	Ehlers-Danlos syndrome	cd24 neutrophil	-0.560348	6	0.946	0.997	0	0
PS130000	Ehlers-Danlos syndrome	erythrocyte	-0.913525	6	0.871	0.997	0	0
PS130000	Ehlers-Danlos syndrome	erythroid progenitor	-0.131734	6	0.793	0.997	0	0
PS130000	Ehlers-Danlos syndrome	granulocyte	0.0128087	6	0.205	0.997	0	0
PS130000	Ehlers-Danlos syndrome	hematopoietic stem cell	0.125878	6	0.131	0.997	0	0
PS130000	Ehlers-Danlos syndrome	macrophage	-0.504443	6	0.978	0.997	0	0
PS130000	Ehlers-Danlos syndrome	memory b cell	-0.27796	6	0.943	0.997	0	0
PS130000	Ehlers-Danlos syndrome	monocyte	0.37261	6	0.007	0.112	0	0
PS130000	Ehlers-Danlos syndrome	myeloid progenitor	-0.144577	6	0.882	0.997	0	0
PS130000	Ehlers-Danlos syndrome	naive b cell	-0.0272351	6	0.703	0.997	0	0
PS130000	Ehlers-Danlos syndrome	nampt neutrophil	-0.556115	6	0.845	0.997	0	0
PS130000	Ehlers-Danlos syndrome	neutrophil	-0.568953	6	0.884	0.997	0	0
PS130000	Ehlers-Danlos syndrome	nk cell	0.00718136	6	0.396	0.997	0	0
PS130000	Ehlers-Danlos syndrome	plasma cell	-0.266988	6	0.479	0.997	0	0
130600	Elliptocytosis 2	cd4-positive, alpha-beta t cell	-0.291877	1	0.795	0.872	0	0
130600	Elliptocytosis 2	cd8-positive, alpha-beta t cell	-0.295953	1	0.85	0.872	0	0
130600	Elliptocytosis 2	cd24 neutrophil	-0.291275	1	0.653	0.872	0	0
130600	Elliptocytosis 2	erythrocyte	3.71556	1	0.005	0.08	1	1
130600	Elliptocytosis 2	erythroid progenitor	0.239571	1	0.251	0.872	0	0
130600	Elliptocytosis 2	granulocyte	-0.29475	1	0.797	0.872	0	0
130600	Elliptocytosis 2	hematopoietic stem cell	-0.289054	1	0.802	0.872	0	0
130600	Elliptocytosis 2	macrophage	-0.294601	1	0.712	0.872	0	0
130600	Elliptocytosis 2	memory b cell	-0.292069	1	0.761	0.872	0	0
130600	Elliptocytosis 2	monocyte	-0.286583	1	0.813	0.872	0	0
130600	Elliptocytosis 2	myeloid progenitor	-0.147031	1	0.738	0.872	0	0
130600	Elliptocytosis 2	naive b cell	-0.295953	1	0.717	0.872	0	0
130600	Elliptocytosis 2	nampt neutrophil	-0.295953	1	0.584	0.872	0	0
130600	Elliptocytosis 2	neutrophil	-0.292924	1	0.631	0.872	0	0
130600	Elliptocytosis 2	nk cell	-0.291459	1	0.872	0.872	0	0
130600	Elliptocytosis 2	plasma cell	-0.295648	1	0.498	0.872	0	0
PS133100	Erythrocytosis, familial	cd4-positive, alpha-beta t cell	-0.318155	3	0.883	0.934	0	0
PS133100	Erythrocytosis, familial	cd8-positive, alpha-beta t cell	-0.192907	3	0.882	0.934	0	0
PS133100	Erythrocytosis, familial	cd24 neutrophil	0.675542	3	0.059	0.934	0	0
PS133100	Erythrocytosis, familial	erythrocyte	-0.715852	3	0.676	0.934	0	0
PS133100	Erythrocytosis, familial	erythroid progenitor	-0.0997264	3	0.765	0.934	0	1
PS133100	Erythrocytosis, familial	granulocyte	-0.278479	3	0.92	0.934	0	0	0
PS133100	Erythrocytosis, familial	hematopoietic stem cell	-0.275955	3	0.894	0.934	0	0
PS133100	Erythrocytosis, familial	macrophage	-0.361535	3	0.845	0.934	0	0
PS133100	Erythrocytosis, familial	memory b cell	-0.433603	3	0.928	0.934	0	0
PS133100	Erythrocytosis, familial	monocyte	-0.293053	3	0.925	0.934	0	0
PS133100	Erythrocytosis, familial	myeloid progenitor	0.159144	3	0.178	0.934	0	0
PS133100	Erythrocytosis, familial	naive b cell	-0.494337	3	0.926	0.934	0	0
PS133100	Erythrocytosis, familial	nampt neutrophil	-0.369822	3	0.689	0.934	0	0
PS133100	Erythrocytosis, familial	neutrophil	-0.517644	3	0.758	0.934	0	0
PS133100	Erythrocytosis, familial	nk cell	-0.229872	3	0.934	0.934	0	0
PS133100	Erythrocytosis, familial	plasma cell	-0.571867	3	0.664	0.934	0	0
PS231200	Bleeding disorder, platelet-type	cd4-positive, alpha-beta t cell	-0.366848	12	0.997	0.999	0	0
PS231200	Bleeding disorder, platelet-type	cd8-positive, alpha-beta t cell	-0.368016	12	0.999	0.999	0	0
PS231200	Bleeding disorder, platelet-type	cd24 neutrophil	-0.319952	12	0.908	0.999	0	0
PS231200	Bleeding disorder, platelet-type	erythrocyte	-0.555248	12	0.712	0.999	0	0
PS231200	Bleeding disorder, platelet-type	erythroid progenitor	-0.247671	12	0.969	0.999	0	0
PS231200	Bleeding disorder, platelet-type	granulocyte	-0.276724	12	0.995	0.999	0	0
PS231200	Bleeding disorder, platelet-type	hematopoietic stem cell	-0.0936978	12	0.963	0.999	0	0
PS231200	Bleeding disorder, platelet-type	macrophage	-0.30489	12	0.96	0.999	0	0
PS231200	Bleeding disorder, platelet-type	memory b cell	-0.406576	12	0.994	0.999	0	0
PS231200	Bleeding disorder, platelet-type	monocyte	-0.259799	12	0.991	0.999	0	0
PS231200	Bleeding disorder, platelet-type	myeloid progenitor	-0.000482709	12	0.925	0.999	0	0
PS231200	Bleeding disorder, platelet-type	naive b cell	-0.428153	12	0.994	0.999	0	0
PS231200	Bleeding disorder, platelet-type	nampt neutrophil	-0.322846	12	0.813	0.999	0	0
PS231200	Bleeding disorder, platelet-type	neutrophil	-0.219545	12	0.787	0.999	0	0
PS231200	Bleeding disorder, platelet-type	nk cell	-0.27033	12	0.999	0.999	0	0
PS231200	Bleeding disorder, platelet-type	plasma cell	-0.639903	12	0.862	0.999	0	0
140700	Heinz Body Anemias	cd4-positive, alpha-beta t cell	-0.274365	3	0.872	0.943	0	0
140700	Heinz Body Anemias	cd8-positive, alpha-beta t cell	-0.275162	3	0.914	0.943	0	0
140700	Heinz Body Anemias	cd24 neutrophil	-0.271388	3	0.758	0.943	0	0
140700	Heinz Body Anemias	erythrocyte	3.73251	3	0	0	1	0
140700	Heinz Body Anemias	erythroid progenitor	0.112106	3	0.171	0.943	0	0
140700	Heinz Body Anemias	granulocyte	-0.274738	3	0.885	0.943	0	0
140700	Heinz Body Anemias	hematopoietic stem cell	-0.275912	3	0.903	0.943	0	0
140700	Heinz Body Anemias	macrophage	-0.276127	3	0.796	0.943	0	0
140700	Heinz Body Anemias	memory b cell	-0.275247	3	0.865	0.943	0	0
140700	Heinz Body Anemias	monocyte	-0.27466	3	0.896	0.943	0	0
140700	Heinz Body Anemias	myeloid progenitor	-0.273406	3	0.893	0.943	0	0
140700	Heinz Body Anemias	naive b cell	-0.275287	3	0.82	0.943	0	0
140700	Heinz Body Anemias	nampt neutrophil	-0.273973	3	0.663	0.943	0	0
140700	Heinz Body Anemias	neutrophil	-0.273404	3	0.684	0.943	0	0
140700	Heinz Body Anemias	nk cell	-0.274779	3	0.943	0.943	0	0
140700	Heinz Body Anemias	plasma cell	-0.276166	3	0.474	0.943	0	0
141749	Fetal Hemoglobin Quantitative Trait Locus 1	cd4-positive, alpha-beta t cell	-0.279789	1	0.778	0.861	0	0
141749	Fetal Hemoglobin Quantitative Trait Locus 1	cd8-positive, alpha-beta t cell	-0.280715	1	0.825	0.861	0	0
141749	Fetal Hemoglobin Quantitative Trait Locus 1	cd24 neutrophil	-0.278279	1	0.639	0.861	0	0
141749	Fetal Hemoglobin Quantitative Trait Locus 1	erythrocyte	3.72299	1	0.006	0.096	1	0
141749	Fetal Hemoglobin Quantitative Trait Locus 1	erythroid progenitor	0.200073	1	0.211	0.861	0	0
141749	Fetal Hemoglobin Quantitative Trait Locus 1	granulocyte	-0.280907	1	0.799	0.861	0	0
141749	Fetal Hemoglobin Quantitative Trait Locus 1	hematopoietic stem cell	-0.281386	1	0.817	0.861	0	0
141749	Fetal Hemoglobin Quantitative Trait Locus 1	macrophage	-0.281099	1	0.699	0.861	0	0
141749	Fetal Hemoglobin Quantitative Trait Locus 1	memory b cell	-0.280612	1	0.756	0.861	0	0
141749	Fetal Hemoglobin Quantitative Trait Locus 1	monocyte	-0.280526	1	0.828	0.861	0	0
141749	Fetal Hemoglobin Quantitative Trait Locus 1	myeloid progenitor	-0.276592	1	0.809	0.861	0	0
141749	Fetal Hemoglobin Quantitative Trait Locus 1	naive b cell	-0.280853	1	0.753	0.861	0	0
141749	Fetal Hemoglobin Quantitative Trait Locus 1	nampt neutrophil	-0.280034	1	0.598	0.861	0	0
141749	Fetal Hemoglobin Quantitative Trait Locus 1	neutrophil	-0.280087	1	0.615	0.861	0	0
141749	Fetal Hemoglobin Quantitative Trait Locus 1	nk cell	-0.28048	1	0.861	0.861	0	0
141749	Fetal Hemoglobin Quantitative Trait Locus 1	plasma cell	-0.281699	1	0.497	0.861	0	0
142680	Periodic Fever, Familial, Autosomal Dominant	cd4-positive, alpha-beta t cell	-0.51055	1	0.908	0.999	0	0
142680	Periodic Fever, Familial, Autosomal Dominant	cd8-positive, alpha-beta t cell	0.360218	1	0.238	0.476	0	0
142680	Periodic Fever, Familial, Autosomal Dominant	cd24 neutrophil	-0.353958	1	0.691	0.999	0	0
142680	Periodic Fever, Familial, Autosomal Dominant	erythrocyte	-1.22079	1	0.794	0.999	0	0
142680	Periodic Fever, Familial, Autosomal Dominant	erythroid progenitor	-0.773416	1	0.936	0.999	0	0
142680	Periodic Fever, Familial, Autosomal Dominant	granulocyte	0.172147	1	0.236	0.476	0	0
142680	Periodic Fever, Familial, Autosomal Dominant	hematopoietic stem cell	0.568212	1	0.155	0.413333	0	0
142680	Periodic Fever, Familial, Autosomal Dominant	macrophage	1.30971	1	0.06	0.389333	0	0
142680	Periodic Fever, Familial, Autosomal Dominant	memory b cell	-1.18668	1	0.999	0.999	0	0
142680	Periodic Fever, Familial, Autosomal Dominant	monocyte	1.00977	1	0.04	0.389333	0	0
142680	Periodic Fever, Familial, Autosomal Dominant	myeloid progenitor	-0.593824	1	0.911	0.999	0	0
142680	Periodic Fever, Familial, Autosomal Dominant	naive b cell	-1.22079	1	0.991	0.999	0	0
142680	Periodic Fever, Familial, Autosomal Dominant	nampt neutrophil	1.66977	1	0.073	0.389333	0	0
142680	Periodic Fever, Familial, Autosomal Dominant	neutrophil	0.871671	1	0.141	0.413333	0	0
142680	Periodic Fever, Familial, Autosomal Dominant	nk cell	1.06819	1	0.146	0.413333	0	0
142680	Periodic Fever, Familial, Autosomal Dominant	plasma cell	-1.16968	1	0.88	0.999	0	0
PS147060	Hyper-IgE recurrent infection syndrome	cd4-positive, alpha-beta t cell	0.00358399	4	0.275	0.88	0	0
PS147060	Hyper-IgE recurrent infection syndrome	cd8-positive, alpha-beta t cell	0.0375951	4	0.333	0.888	0	0
PS147060	Hyper-IgE recurrent infection syndrome	cd24 neutrophil	1.28751	4	0.009	0.048	1	0
PS147060	Hyper-IgE recurrent infection syndrome	erythrocyte	-1.01858	4	0.884	0.999	0	0
PS147060	Hyper-IgE recurrent infection syndrome	erythroid progenitor	-0.834064	4	0.999	0.999	0	0
PS147060	Hyper-IgE recurrent infection syndrome	granulocyte	-0.272671	4	0.93	0.999	0	0
PS147060	Hyper-IgE recurrent infection syndrome	hematopoietic stem cell	-0.383533	4	0.974	0.999	0	0
PS147060	Hyper-IgE recurrent infection syndrome	macrophage	-0.254705	4	0.817	0.999	0	0
PS147060	Hyper-IgE recurrent infection syndrome	memory b cell	-0.571975	4	0.991	0.999	0	0
PS147060	Hyper-IgE recurrent infection syndrome	monocyte	0.122957	4	0.14	0.56	0	0
PS147060	Hyper-IgE recurrent infection syndrome	myeloid progenitor	-0.646317	4	0.999	0.999	0	0
PS147060	Hyper-IgE recurrent infection syndrome	naive b cell	-0.591097	4	0.981	0.999	0	0
PS147060	Hyper-IgE recurrent infection syndrome	nampt neutrophil	1.85779	4	0.002	0.016	1	0
PS147060	Hyper-IgE recurrent infection syndrome	neutrophil	1.75813	4	0.001	0.016	1	0
PS147060	Hyper-IgE recurrent infection syndrome	nk cell	-0.285101	4	0.982	0.999	0	0
PS147060	Hyper-IgE recurrent infection syndrome	plasma cell	-0.745876	4	0.852	0.999	0	0
PS147920	Kabuki syndrome	cd4-positive, alpha-beta t cell	-0.503878	1	0.889	0.993	0	0
PS147920	Kabuki syndrome	cd8-positive, alpha-beta t cell	-0.159149	1	0.778	0.993	0	0
PS147920	Kabuki syndrome	cd24 neutrophil	1.86661	1	0.049	0.3	0	0
PS147920	Kabuki syndrome	erythrocyte	0.678848	1	0.063	0.3	0	0
PS147920	Kabuki syndrome	erythroid progenitor	-0.847602	1	0.953	0.993	0	0
PS147920	Kabuki syndrome	granulocyte	-0.197555	1	0.759	0.993	0	0
PS147920	Kabuki syndrome	hematopoietic stem cell	-0.970587	1	0.993	0.993	0	0
PS147920	Kabuki syndrome	macrophage	-0.223952	1	0.678	0.993	0	0
PS147920	Kabuki syndrome	memory b cell	-0.356753	1	0.764	0.993	0	0
PS147920	Kabuki syndrome	monocyte	-0.319038	1	0.828	0.993	0	0
PS147920	Kabuki syndrome	myeloid progenitor	-0.668103	1	0.935	0.993	0	0
PS147920	Kabuki syndrome	naive b cell	-0.391257	1	0.786	0.993	0	0
PS147920	Kabuki syndrome	nampt neutrophil	1.48068	1	0.075	0.3	0	0
PS147920	Kabuki syndrome	neutrophil	1.71879	1	0.062	0.3	0	0
PS147920	Kabuki syndrome	nk cell	0.550589	1	0.279	0.8928	0	0
PS147920	Kabuki syndrome	plasma cell	-1.65764	1	0.981	0.993	0	0
150550	Periodic Fever, Immunodeficiency, And Thrombocytopenia Syndrome	cd4-positive, alpha-beta t cell	0.24883	1	0.168	0.444	0	0
150550	Periodic Fever, Immunodeficiency, And Thrombocytopenia Syndrome	cd8-positive, alpha-beta t cell	0.680444	1	0.191	0.444	0	0
150550	Periodic Fever, Immunodeficiency, And Thrombocytopenia Syndrome	cd24 neutrophil	2.33919	1	0.019	0.304	0	0
150550	Periodic Fever, Immunodeficiency, And Thrombocytopenia Syndrome	erythrocyte	-1.75008	1	0.968	0.99	0	0
150550	Periodic Fever, Immunodeficiency, And Thrombocytopenia Syndrome	erythroid progenitor	-0.31974	1	0.759	0.99	0	0
150550	Periodic Fever, Immunodeficiency, And Thrombocytopenia Syndrome	granulocyte	0.280613	1	0.222	0.444	0	0
150550	Periodic Fever, Immunodeficiency, And Thrombocytopenia Syndrome	hematopoietic stem cell	-0.199369	1	0.791	0.99	0	0
150550	Periodic Fever, Immunodeficiency, And Thrombocytopenia Syndrome	macrophage	0.687126	1	0.109	0.444	0	0
150550	Periodic Fever, Immunodeficiency, And Thrombocytopenia Syndrome	memory b cell	-0.754556	1	0.964	0.99	0	0
150550	Periodic Fever, Immunodeficiency, And Thrombocytopenia Syndrome	monocyte	-0.0710031	1	0.688	0.99	0	0
150550	Periodic Fever, Immunodeficiency, And Thrombocytopenia Syndrome	myeloid progenitor	-0.142438	1	0.755	0.99	0	0
150550	Periodic Fever, Immunodeficiency, And Thrombocytopenia Syndrome	naive b cell	-1.19176	1	0.99	0.99	0	0
150550	Periodic Fever, Immunodeficiency, And Thrombocytopenia Syndrome	nampt neutrophil	0.268735	1	0.126	0.444	0	0
150550	Periodic Fever, Immunodeficiency, And Thrombocytopenia Syndrome	neutrophil	0.563577	1	0.139	0.444	0	0
150550	Periodic Fever, Immunodeficiency, And Thrombocytopenia Syndrome	nk cell	0.828758	1	0.211	0.444	0	0
150550	Periodic Fever, Immunodeficiency, And Thrombocytopenia Syndrome	plasma cell	-1.46832	1	0.946	0.99	0	0
PS151623	Li-Fraumeni syndrome	cd4-positive, alpha-beta t cell	-0.390247	1	0.834	0.89	0	0
PS151623	Li-Fraumeni syndrome	cd8-positive, alpha-beta t cell	-0.35318	1	0.871	0.89	0	0
PS151623	Li-Fraumeni syndrome	cd24 neutrophil	-0.941802	1	0.886	0.89	0	0
PS151623	Li-Fraumeni syndrome	erythrocyte	-1.04405	1	0.736	0.89	0	0
PS151623	Li-Fraumeni syndrome	erythroid progenitor	1.4012	1	0.097	0.388	0	0
PS151623	Li-Fraumeni syndrome	granulocyte	1.20096	1	0.069	0.388	0	0
PS151623	Li-Fraumeni syndrome	hematopoietic stem cell	0.368383	1	0.183	0.477714	0	0
PS151623	Li-Fraumeni syndrome	macrophage	-0.196626	1	0.665	0.89	0	0
PS151623	Li-Fraumeni syndrome	memory b cell	0.572157	1	0.094	0.388	0	0
PS151623	Li-Fraumeni syndrome	monocyte	0.220846	1	0.171	0.477714	0	0
PS151623	Li-Fraumeni syndrome	myeloid progenitor	2.29101	1	0.013	0.208	0	0
PS151623	Li-Fraumeni syndrome	naive b cell	0.249677	1	0.209	0.477714	0	0
PS151623	Li-Fraumeni syndrome	nampt neutrophil	-1.0983	1	0.828	0.89	0	0
PS151623	Li-Fraumeni syndrome	neutrophil	-1.16392	1	0.89	0.89	0	0
PS151623	Li-Fraumeni syndrome	nk cell	-0.174071	1	0.829	0.89	0	0
PS151623	Li-Fraumeni syndrome	plasma cell	-0.942032	1	0.794	0.89	0	0
152700	Systemic Lupus Erythematosus	cd4-positive, alpha-beta t cell	-0.243037	5	0.906	0.994	0	0
152700	Systemic Lupus Erythematosus	cd8-positive, alpha-beta t cell	-0.322333	5	0.978	0.994	0	0
152700	Systemic Lupus Erythematosus	cd24 neutrophil	0.143917	5	0.053	0.282667	0	0
152700	Systemic Lupus Erythematosus	erythrocyte	-0.502117	5	0.612	0.994	0	0
152700	Systemic Lupus Erythematosus	erythroid progenitor	-0.569579	5	0.971	0.994	0	0
152700	Systemic Lupus Erythematosus	granulocyte	-0.397826	5	0.986	0.994	0	0
152700	Systemic Lupus Erythematosus	hematopoietic stem cell	-0.496652	5	0.994	0.994	0	0
152700	Systemic Lupus Erythematosus	macrophage	-0.374081	5	0.92	0.994	0	0
152700	Systemic Lupus Erythematosus	memory b cell	-0.427908	5	0.946	0.994	0	0
152700	Systemic Lupus Erythematosus	monocyte	-0.345471	5	0.974	0.994	0	0
152700	Systemic Lupus Erythematosus	myeloid progenitor	-0.374081	5	0.953	0.994	0	0
152700	Systemic Lupus Erythematosus	naive b cell	-0.374081	5	0.928	0.994	0	0
152700	Systemic Lupus Erythematosus	nampt neutrophil	0.323596	5	0.017	0.136	0	0
152700	Systemic Lupus Erythematosus	neutrophil	1.5188	5	0.006	0.096	1	0
152700	Systemic Lupus Erythematosus	nk cell	-0.034627	5	0.936	0.994	0	0
152700	Systemic Lupus Erythematosus	plasma cell	-0.484455	5	0.653	0.994	0	0
153670	Bernard-soulier Syndrome, Benign Autosomal Dominant	cd4-positive, alpha-beta t cell	-0.333397	1	0.785	0.885	0	0
153670	Bernard-soulier Syndrome, Benign Autosomal Dominant	cd8-positive, alpha-beta t cell	-0.421456	1	0.877	0.885	0	0
153670	Bernard-soulier Syndrome, Benign Autosomal Dominant	cd24 neutrophil	-0.431915	1	0.708	0.885	0	0
153670	Bernard-soulier Syndrome, Benign Autosomal Dominant	erythrocyte	-0.474807	1	0.562	0.885	0	0
153670	Bernard-soulier Syndrome, Benign Autosomal Dominant	erythroid progenitor	1.43208	1	0.083	0.664	0	0
153670	Bernard-soulier Syndrome, Benign Autosomal Dominant	granulocyte	-0.438054	1	0.885	0.885	0	0
153670	Bernard-soulier Syndrome, Benign Autosomal Dominant	hematopoietic stem cell	0.0658448	1	0.27	0.885	0	0
153670	Bernard-soulier Syndrome, Benign Autosomal Dominant	macrophage	-0.474807	1	0.816	0.885	0	0
153670	Bernard-soulier Syndrome, Benign Autosomal Dominant	memory b cell	-0.189632	1	0.715	0.885	0	0
153670	Bernard-soulier Syndrome, Benign Autosomal Dominant	monocyte	-0.205733	1	0.777	0.885	0	0
153670	Bernard-soulier Syndrome, Benign Autosomal Dominant	myeloid progenitor	3.3212	1	0.001	0.016	1	0
153670	Bernard-soulier Syndrome, Benign Autosomal Dominant	naive b cell	-0.268789	1	0.71	0.885	0	0
153670	Bernard-soulier Syndrome, Benign Autosomal Dominant	nampt neutrophil	-0.428767	1	0.653	0.885	0	0
153670	Bernard-soulier Syndrome, Benign Autosomal Dominant	neutrophil	-0.474807	1	0.675	0.885	0	0
153670	Bernard-soulier Syndrome, Benign Autosomal Dominant	nk cell	-0.277635	1	0.841	0.885	0	0
153670	Bernard-soulier Syndrome, Benign Autosomal Dominant	plasma cell	-0.399321	1	0.524	0.885	0	0
154800	Mast Cell Disease	cd4-positive, alpha-beta t cell	-0.460202	1	0.86	0.953	0	0
154800	Mast Cell Disease	cd8-positive, alpha-beta t cell	-0.485664	1	0.918	0.953	0	0
154800	Mast Cell Disease	cd24 neutrophil	-0.531454	1	0.747	0.953	0	0
154800	Mast Cell Disease	erythrocyte	-0.481143	1	0.539	0.953	0	0
154800	Mast Cell Disease	erythroid progenitor	2.15111	1	0.033	0.176	0	0
154800	Mast Cell Disease	granulocyte	-0.195831	1	0.75	0.953	0	0
154800	Mast Cell Disease	hematopoietic stem cell	1.78382	1	0.028	0.176	0	0
154800	Mast Cell Disease	macrophage	-0.548768	1	0.86	0.953	0	1
154800	Mast Cell Disease	memory b cell	-0.548768	1	0.891	0.953	0	0
154800	Mast Cell Disease	monocyte	-0.0369543	1	0.674	0.953	0	0
154800	Mast Cell Disease	myeloid progenitor	2.03641	1	0.031	0.176	0	0
154800	Mast Cell Disease	naive b cell	-0.548768	1	0.86	0.953	0	0
154800	Mast Cell Disease	nampt neutrophil	-0.519521	1	0.67	0.953	0	0
154800	Mast Cell Disease	neutrophil	-0.548768	1	0.69	0.953	0	0
154800	Mast Cell Disease	nk cell	-0.520486	1	0.953	0.953	0	0
154800	Mast Cell Disease	plasma cell	-0.545014	1	0.586	0.953	0	0
PS158350	Cowden disease	cd4-positive, alpha-beta t cell	-0.49316	1	0.893	0.927	0	0
PS158350	Cowden disease	cd8-positive, alpha-beta t cell	-0.529768	1	0.927	0.927	0	0
PS158350	Cowden disease	cd24 neutrophil	0.648583	1	0.128	0.682667	0	0
PS158350	Cowden disease	erythrocyte	-0.636543	1	0.613	0.927	0	0
PS158350	Cowden disease	erythroid progenitor	-0.608251	1	0.876	0.927	0	0
PS158350	Cowden disease	granulocyte	-0.375562	1	0.864	0.927	0	0
PS158350	Cowden disease	hematopoietic stem cell	-0.376619	1	0.847	0.927	0	0
PS158350	Cowden disease	macrophage	-0.299326	1	0.709	0.927	0	0
PS158350	Cowden disease	memory b cell	-0.459666	1	0.853	0.927	0	0
PS158350	Cowden disease	monocyte	0.0595818	1	0.195	0.78	0	0
PS158350	Cowden disease	myeloid progenitor	-0.305835	1	0.823	0.927	0	0
PS158350	Cowden disease	naive b cell	-0.273445	1	0.695	0.927	0	0
PS158350	Cowden disease	nampt neutrophil	2.1523	1	0.032	0.256	0	0
PS158350	Cowden disease	neutrophil	2.66828	1	0.004	0.064	1	0
PS158350	Cowden disease	nk cell	-0.376199	1	0.901	0.927	0	0
PS158350	Cowden disease	plasma cell	-0.794375	1	0.729	0.927	0	0
159550	Ataxia-pancytopenia Syndrome	cd4-positive, alpha-beta t cell	-0.286681	1	0.788	0.934	0	0
159550	Ataxia-pancytopenia Syndrome	cd8-positive, alpha-beta t cell	0.483428	1	0.217	0.6944	0	0
159550	Ataxia-pancytopenia Syndrome	cd24 neutrophil	3.13273	1	0.004	0.064	1	0
159550	Ataxia-pancytopenia Syndrome	erythrocyte	-1.04379	1	0.737	0.934	0	0
159550	Ataxia-pancytopenia Syndrome	erythroid progenitor	-0.831103	1	0.934	0.934	0	0
159550	Ataxia-pancytopenia Syndrome	granulocyte	-0.486502	1	0.919	0.934	0	0
159550	Ataxia-pancytopenia Syndrome	hematopoietic stem cell	-0.26711	1	0.82	0.934	0	0
159550	Ataxia-pancytopenia Syndrome	macrophage	-0.559214	1	0.857	0.934	0	0
159550	Ataxia-pancytopenia Syndrome	memory b cell	-0.207805	1	0.74	0.934	0	0
159550	Ataxia-pancytopenia Syndrome	monocyte	-0.188418	1	0.764	0.934	0	0
159550	Ataxia-pancytopenia Syndrome	myeloid progenitor	-0.583264	1	0.909	0.934	0	0
159550	Ataxia-pancytopenia Syndrome	naive b cell	0.547172	1	0.163	0.652	0	0
159550	Ataxia-pancytopenia Syndrome	nampt neutrophil	0.0573861	1	0.163	0.652	0	0
159550	Ataxia-pancytopenia Syndrome	neutrophil	-0.194076	1	0.6	0.934	0	0
159550	Ataxia-pancytopenia Syndrome	nk cell	1.11323	1	0.126	0.652	0	0
159550	Ataxia-pancytopenia Syndrome	plasma cell	-0.685992	1	0.648	0.934	0	0
162800	Cyclic Hematopoiesis	cd4-positive, alpha-beta t cell	-0.32458	1	0.812	0.862	0	0
162800	Cyclic Hematopoiesis	cd8-positive, alpha-beta t cell	-0.33937	1	0.862	0.862	0	0
162800	Cyclic Hematopoiesis	cd24 neutrophil	-0.141848	1	0.644	0.862	0	0
162800	Cyclic Hematopoiesis	erythrocyte	-0.166496	1	0.508	0.862	0	0
162800	Cyclic Hematopoiesis	erythroid progenitor	-0.336849	1	0.755	0.862	0	0
162800	Cyclic Hematopoiesis	granulocyte	3.71746	1	0.001	0.016	1	1
162800	Cyclic Hematopoiesis	hematopoietic stem cell	0.179009	1	0.254	0.862	0	0
162800	Cyclic Hematopoiesis	macrophage	-0.339752	1	0.754	0.862	0	0
162800	Cyclic Hematopoiesis	memory b cell	-0.288889	1	0.755	0.862	0	0
162800	Cyclic Hematopoiesis	monocyte	-0.186027	1	0.738	0.862	0	0
162800	Cyclic Hematopoiesis	myeloid progenitor	-0.277574	1	0.796	0.862	0	0
162800	Cyclic Hematopoiesis	naive b cell	-0.24953	1	0.736	0.862	0	0
162800	Cyclic Hematopoiesis	nampt neutrophil	-0.328093	1	0.598	0.862	0	0
162800	Cyclic Hematopoiesis	neutrophil	-0.328447	1	0.663	0.862	0	0
162800	Cyclic Hematopoiesis	nk cell	-0.245478	1	0.852	0.862	0	0
162800	Cyclic Hematopoiesis	plasma cell	-0.343538	1	0.499	0.862	0	0
PS163950	Noonan syndrome	cd4-positive, alpha-beta t cell	-0.246049	6	0.947	0.99	0	0
PS163950	Noonan syndrome	cd8-positive, alpha-beta t cell	0.168617	6	0.183	0.5856	0	0
PS163950	Noonan syndrome	cd24 neutrophil	0.940704	6	0.007	0.112	0	0
PS163950	Noonan syndrome	erythrocyte	-0.971702	6	0.908	0.99	0	0
PS163950	Noonan syndrome	erythroid progenitor	-0.301398	6	0.936	0.99	0	0
PS163950	Noonan syndrome	granulocyte	-0.321987	6	0.977	0.99	0	0
PS163950	Noonan syndrome	hematopoietic stem cell	-0.402313	6	0.99	0.99	0	0
PS163950	Noonan syndrome	macrophage	-0.501681	6	0.984	0.99	0	0
PS163950	Noonan syndrome	memory b cell	-0.433011	6	0.984	0.99	0	0
PS163950	Noonan syndrome	monocyte	-0.0839609	6	0.799	0.99	0	0
PS163950	Noonan syndrome	myeloid progenitor	0.66176	6	0.026	0.138667	0	0
PS163950	Noonan syndrome	naive b cell	-0.42327	6	0.969	0.99	0	0
PS163950	Noonan syndrome	nampt neutrophil	-0.0482532	6	0.502	0.99	0	0
PS163950	Noonan syndrome	neutrophil	0.43967	6	0.024	0.138667	0	0
PS163950	Noonan syndrome	nk cell	0.803311	6	0.039	0.156	0	0
PS163950	Noonan syndrome	plasma cell	-1.06535	6	0.983	0.99	0	0
PS166200	Osteogenesis imperfecta	cd4-positive, alpha-beta t cell	-0.668091	1	0.956	0.987	0	0
PS166200	Osteogenesis imperfecta	cd8-positive, alpha-beta t cell	-0.682718	1	0.98	0.987	0	0
PS166200	Osteogenesis imperfecta	cd24 neutrophil	-0.510035	1	0.722	0.987	0	0
PS166200	Osteogenesis imperfecta	erythrocyte	-0.682718	1	0.649	0.987	0	0
PS166200	Osteogenesis imperfecta	erythroid progenitor	0.943308	1	0.133	0.4256	0	0
PS166200	Osteogenesis imperfecta	granulocyte	1.12861	1	0.077	0.410667	0	0
PS166200	Osteogenesis imperfecta	hematopoietic stem cell	1.38102	1	0.048	0.384	0	0
PS166200	Osteogenesis imperfecta	macrophage	-0.321668	1	0.708	0.987	0	0
PS166200	Osteogenesis imperfecta	memory b cell	-0.682718	1	0.946	0.987	0	0
PS166200	Osteogenesis imperfecta	monocyte	2.24134	1	0.007	0.112	0	0
PS166200	Osteogenesis imperfecta	myeloid progenitor	1.20388	1	0.113	0.4256	0	0
PS166200	Osteogenesis imperfecta	naive b cell	-0.682718	1	0.939	0.987	0	0
PS166200	Osteogenesis imperfecta	nampt neutrophil	-0.682718	1	0.726	0.987	0	0
PS166200	Osteogenesis imperfecta	neutrophil	-0.682718	1	0.727	0.987	0	0
PS166200	Osteogenesis imperfecta	nk cell	-0.682718	1	0.987	0.987	0	0
PS166200	Osteogenesis imperfecta	plasma cell	-0.61934	1	0.637	0.987	0	0
PS607634	Osteopetrosis, autosomal dominant	cd4-positive, alpha-beta t cell	-0.557225	2	0.982	0.982	0	0
PS607634	Osteopetrosis, autosomal dominant	cd8-positive, alpha-beta t cell	-0.288615	2	0.912	0.982	0	0
PS607634	Osteopetrosis, autosomal dominant	cd24 neutrophil	0.957369	2	0.075	0.4	0	0
PS607634	Osteopetrosis, autosomal dominant	erythrocyte	-0.551559	2	0.557	0.8912	0	0
PS607634	Osteopetrosis, autosomal dominant	erythroid progenitor	-0.628283	2	0.963	0.982	0	0
PS607634	Osteopetrosis, autosomal dominant	granulocyte	0.58983	2	0.137	0.548	0	0
PS607634	Osteopetrosis, autosomal dominant	hematopoietic stem cell	-0.174098	2	0.765	0.982	0	0
PS607634	Osteopetrosis, autosomal dominant	macrophage	0.797838	2	0.07	0.4	0	0
PS607634	Osteopetrosis, autosomal dominant	memory b cell	-0.0244477	2	0.52	0.8912	0	0
PS607634	Osteopetrosis, autosomal dominant	monocyte	0.793808	2	0.034	0.4	0	0
PS607634	Osteopetrosis, autosomal dominant	myeloid progenitor	-0.469668	2	0.952	0.982	0	0
PS607634	Osteopetrosis, autosomal dominant	naive b cell	0.0682463	2	0.33	0.786286	0	0
PS607634	Osteopetrosis, autosomal dominant	nampt neutrophil	-0.151117	2	0.466	0.8912	0	0
PS607634	Osteopetrosis, autosomal dominant	neutrophil	0.293256	2	0.212	0.6784	0	0
PS607634	Osteopetrosis, autosomal dominant	nk cell	0.422295	2	0.344	0.786286	0	0
PS607634	Osteopetrosis, autosomal dominant	plasma cell	-1.07763	2	0.917	0.982	0	0
166900	Ovalocytosis, Hereditary Hemolytic	cd4-positive, alpha-beta t cell	-0.271504	1	0.785	0.85	0	0
166900	Ovalocytosis, Hereditary Hemolytic	cd8-positive, alpha-beta t cell	-0.275463	1	0.838	0.85	0	0
166900	Ovalocytosis, Hereditary Hemolytic	cd24 neutrophil	-0.271362	1	0.645	0.85	0	0
166900	Ovalocytosis, Hereditary Hemolytic	erythrocyte	3.73298	1	0.001	0.016	1	1
166900	Ovalocytosis, Hereditary Hemolytic	erythroid progenitor	0.107214	1	0.261	0.85	0	0
166900	Ovalocytosis, Hereditary Hemolytic	granulocyte	-0.273479	1	0.798	0.85	0	0
166900	Ovalocytosis, Hereditary Hemolytic	hematopoietic stem cell	-0.275533	1	0.802	0.85	0	0
166900	Ovalocytosis, Hereditary Hemolytic	macrophage	-0.274232	1	0.722	0.85	0	0
166900	Ovalocytosis, Hereditary Hemolytic	memory b cell	-0.27539	1	0.748	0.85	0	0
166900	Ovalocytosis, Hereditary Hemolytic	monocyte	-0.274677	1	0.825	0.85	0	0
166900	Ovalocytosis, Hereditary Hemolytic	myeloid progenitor	-0.273258	1	0.789	0.85	0	0
166900	Ovalocytosis, Hereditary Hemolytic	naive b cell	-0.276267	1	0.716	0.85	0	0
166900	Ovalocytosis, Hereditary Hemolytic	nampt neutrophil	-0.271589	1	0.636	0.85	0	0
166900	Ovalocytosis, Hereditary Hemolytic	neutrophil	-0.276267	1	0.609	0.85	0	0
166900	Ovalocytosis, Hereditary Hemolytic	nk cell	-0.275353	1	0.85	0.85	0	0
166900	Ovalocytosis, Hereditary Hemolytic	plasma cell	-0.275816	1	0.468	0.85	0	0
169400	Pelger-huet Anomaly	cd4-positive, alpha-beta t cell	-0.519339	1	0.913	0.913	0	0
169400	Pelger-huet Anomaly	cd8-positive, alpha-beta t cell	-0.437329	1	0.9	0.913	0	0
169400	Pelger-huet Anomaly	cd24 neutrophil	2.22069	1	0.023	0.288	0	0
169400	Pelger-huet Anomaly	erythrocyte	-0.732483	1	0.649	0.913	0	0
169400	Pelger-huet Anomaly	erythroid progenitor	-0.250304	1	0.746	0.913	0	0
169400	Pelger-huet Anomaly	granulocyte	-0.0384099	1	0.705	0.913	0	1
169400	Pelger-huet Anomaly	hematopoietic stem cell	-0.537905	1	0.907	0.913	0	0
169400	Pelger-huet Anomaly	macrophage	-0.636557	1	0.891	0.913	0	0
169400	Pelger-huet Anomaly	memory b cell	-0.58509	1	0.912	0.913	0	0
169400	Pelger-huet Anomaly	monocyte	-0.30874	1	0.819	0.913	0	0
169400	Pelger-huet Anomaly	myeloid progenitor	-0.398636	1	0.823	0.913	0	0
169400	Pelger-huet Anomaly	naive b cell	-0.336555	1	0.745	0.913	0	0
169400	Pelger-huet Anomaly	nampt neutrophil	1.8091	1	0.054	0.288	0	0
169400	Pelger-huet Anomaly	neutrophil	1.89754	1	0.045	0.288	0	0
169400	Pelger-huet Anomaly	nk cell	-0.38281	1	0.9	0.913	0	0
169400	Pelger-huet Anomaly	plasma cell	-0.76318	1	0.724	0.913	0	0
170100	Prolidase Deficiency	cd4-positive, alpha-beta t cell	-0.0123914	1	0.655	0.972	0	0
170100	Prolidase Deficiency	cd8-positive, alpha-beta t cell	0.447605	1	0.223	0.552	0	0
170100	Prolidase Deficiency	cd24 neutrophil	-1.27692	1	0.978	0.978	0	0
170100	Prolidase Deficiency	erythrocyte	-1.21455	1	0.822	0.978	0	0
170100	Prolidase Deficiency	erythroid progenitor	0.117172	1	0.276	0.552	0	0
170100	Prolidase Deficiency	granulocyte	0.789631	1	0.121	0.484	0	0
170100	Prolidase Deficiency	hematopoietic stem cell	0.105754	1	0.273	0.552	0	0
170100	Prolidase Deficiency	macrophage	1.625	1	0.036	0.288	0	0
170100	Prolidase Deficiency	memory b cell	0.423878	1	0.121	0.484	0	0
170100	Prolidase Deficiency	monocyte	1.69027	1	0.022	0.288	0	0
170100	Prolidase Deficiency	myeloid progenitor	-0.0270124	1	0.729	0.972	0	0
170100	Prolidase Deficiency	naive b cell	-0.158213	1	0.68	0.972	0	0
170100	Prolidase Deficiency	nampt neutrophil	-1.3124	1	0.912	0.978	0	0
170100	Prolidase Deficiency	neutrophil	-1.41097	1	0.933	0.978	0	0
170100	Prolidase Deficiency	nk cell	1.00278	1	0.175	0.552	0	0
170100	Prolidase Deficiency	plasma cell	-0.789649	1	0.714	0.972	0	0
PS162000	Tubulointerstitial kidney disease	cd4-positive, alpha-beta t cell	0.14039	1	0.214	0.414222	0	0
PS162000	Tubulointerstitial kidney disease	cd8-positive, alpha-beta t cell	0.382344	1	0.224	0.414222	0	0
PS162000	Tubulointerstitial kidney disease	cd24 neutrophil	-0.695232	1	0.783	0.959	0	0
PS162000	Tubulointerstitial kidney disease	erythrocyte	-1.21235	1	0.807	0.959	0	0
PS162000	Tubulointerstitial kidney disease	erythroid progenitor	0.0583407	1	0.233	0.414222	0	0
PS162000	Tubulointerstitial kidney disease	granulocyte	1.09686	1	0.065	0.414222	0	0
PS162000	Tubulointerstitial kidney disease	hematopoietic stem cell	0.244631	1	0.219	0.414222	0	0
PS162000	Tubulointerstitial kidney disease	macrophage	0.564144	1	0.115	0.414222	0	0
PS162000	Tubulointerstitial kidney disease	memory b cell	-0.724945	1	0.959	0.959	0	0
PS162000	Tubulointerstitial kidney disease	monocyte	0.144103	1	0.209	0.414222	0	0
PS162000	Tubulointerstitial kidney disease	myeloid progenitor	0.104513	1	0.273	0.4368	0	0
PS162000	Tubulointerstitial kidney disease	naive b cell	-0.770542	1	0.944	0.959	0	0
PS162000	Tubulointerstitial kidney disease	nampt neutrophil	-1.345	1	0.918	0.959	0	0
PS162000	Tubulointerstitial kidney disease	neutrophil	-1.22079	1	0.884	0.959	0	0
PS162000	Tubulointerstitial kidney disease	nk cell	0.717287	1	0.204	0.414222	0	0
PS162000	Tubulointerstitial kidney disease	plasma cell	2.51625	1	0.013	0.208	0	1
174900	Juvenile Polyposis Syndrome Juvenile Intestinal Polyposis Polyposis, Familial, Of Entire Gastrointestinal Tract Juvenile Polyposis Of Stomach, Included Juvenile Polyposis Coli, Included	cd4-positive, alpha-beta t cell	0.0438848	1	0.254	0.503111	0	0
174900	Juvenile Polyposis Syndrome Juvenile Intestinal Polyposis Polyposis, Familial, Of Entire Gastrointestinal Tract Juvenile Polyposis Of Stomach, Included Juvenile Polyposis Coli, Included	cd8-positive, alpha-beta t cell	0.398532	1	0.22	0.503111	0	0
174900	Juvenile Polyposis Syndrome Juvenile Intestinal Polyposis Polyposis, Familial, Of Entire Gastrointestinal Tract Juvenile Polyposis Of Stomach, Included Juvenile Polyposis Coli, Included	cd24 neutrophil	0.280668	1	0.163	0.503111	0	0
174900	Juvenile Polyposis Syndrome Juvenile Intestinal Polyposis Polyposis, Familial, Of Entire Gastrointestinal Tract Juvenile Polyposis Of Stomach, Included Juvenile Polyposis Coli, Included	erythrocyte	-0.134653	1	0.464	0.7424	0	0
174900	Juvenile Polyposis Syndrome Juvenile Intestinal Polyposis Polyposis, Familial, Of Entire Gastrointestinal Tract Juvenile Polyposis Of Stomach, Included Juvenile Polyposis Coli, Included	erythroid progenitor	-0.0471488	1	0.672	0.896	0	0
174900	Juvenile Polyposis Syndrome Juvenile Intestinal Polyposis Polyposis, Familial, Of Entire Gastrointestinal Tract Juvenile Polyposis Of Stomach, Included Juvenile Polyposis Coli, Included	granulocyte	0.139736	1	0.283	0.503111	0	0
174900	Juvenile Polyposis Syndrome Juvenile Intestinal Polyposis Polyposis, Familial, Of Entire Gastrointestinal Tract Juvenile Polyposis Of Stomach, Included Juvenile Polyposis Coli, Included	hematopoietic stem cell	-0.486994	1	0.906	1	0	0
174900	Juvenile Polyposis Syndrome Juvenile Intestinal Polyposis Polyposis, Familial, Of Entire Gastrointestinal Tract Juvenile Polyposis Of Stomach, Included Juvenile Polyposis Coli, Included	macrophage	-1.71465	1	1	1	0	0
174900	Juvenile Polyposis Syndrome Juvenile Intestinal Polyposis Polyposis, Familial, Of Entire Gastrointestinal Tract Juvenile Polyposis Of Stomach, Included Juvenile Polyposis Coli, Included	memory b cell	-0.73588	1	0.953	1	0	0
174900	Juvenile Polyposis Syndrome Juvenile Intestinal Polyposis Polyposis, Familial, Of Entire Gastrointestinal Tract Juvenile Polyposis Of Stomach, Included Juvenile Polyposis Coli, Included	monocyte	0.154799	1	0.19	0.503111	0	0
174900	Juvenile Polyposis Syndrome Juvenile Intestinal Polyposis Polyposis, Familial, Of Entire Gastrointestinal Tract Juvenile Polyposis Of Stomach, Included Juvenile Polyposis Coli, Included	myeloid progenitor	0.363836	1	0.23	0.503111	0	0
174900	Juvenile Polyposis Syndrome Juvenile Intestinal Polyposis Polyposis, Familial, Of Entire Gastrointestinal Tract Juvenile Polyposis Of Stomach, Included Juvenile Polyposis Coli, Included	naive b cell	1.41768	1	0.073	0.503111	0	0
174900	Juvenile Polyposis Syndrome Juvenile Intestinal Polyposis Polyposis, Familial, Of Entire Gastrointestinal Tract Juvenile Polyposis Of Stomach, Included Juvenile Polyposis Coli, Included	nampt neutrophil	-0.254836	1	0.556	0.808727	0	0
174900	Juvenile Polyposis Syndrome Juvenile Intestinal Polyposis Polyposis, Familial, Of Entire Gastrointestinal Tract Juvenile Polyposis Of Stomach, Included Juvenile Polyposis Coli, Included	neutrophil	1.66426	1	0.065	0.503111	0	0
174900	Juvenile Polyposis Syndrome Juvenile Intestinal Polyposis Polyposis, Familial, Of Entire Gastrointestinal Tract Juvenile Polyposis Of Stomach, Included Juvenile Polyposis Coli, Included	nk cell	1.09974	1	0.147	0.503111	0	0
174900	Juvenile Polyposis Syndrome Juvenile Intestinal Polyposis Polyposis, Familial, Of Entire Gastrointestinal Tract Juvenile Polyposis Of Stomach, Included Juvenile Polyposis Coli, Included	plasma cell	-2.18897	1	0.994	1	0	0
175050	Juvenile Polyposis/hereditary Hemorrhagic Telangiectasia Syndrome	cd4-positive, alpha-beta t cell	0.0438848	1	0.242	0.469333	0	0
175050	Juvenile Polyposis/hereditary Hemorrhagic Telangiectasia Syndrome	cd8-positive, alpha-beta t cell	0.398532	1	0.217	0.469333	0	0
175050	Juvenile Polyposis/hereditary Hemorrhagic Telangiectasia Syndrome	cd24 neutrophil	0.280668	1	0.164	0.469333	0	0
175050	Juvenile Polyposis/hereditary Hemorrhagic Telangiectasia Syndrome	erythrocyte	-0.134653	1	0.48	0.768	0	0
175050	Juvenile Polyposis/hereditary Hemorrhagic Telangiectasia Syndrome	erythroid progenitor	-0.0471488	1	0.683	0.910667	0	0
175050	Juvenile Polyposis/hereditary Hemorrhagic Telangiectasia Syndrome	granulocyte	0.139736	1	0.264	0.469333	0	0
175050	Juvenile Polyposis/hereditary Hemorrhagic Telangiectasia Syndrome	hematopoietic stem cell	-0.486994	1	0.901	1	0	0
175050	Juvenile Polyposis/hereditary Hemorrhagic Telangiectasia Syndrome	macrophage	-1.71465	1	1	1	0	0
175050	Juvenile Polyposis/hereditary Hemorrhagic Telangiectasia Syndrome	memory b cell	-0.73588	1	0.953	1	0	0
175050	Juvenile Polyposis/hereditary Hemorrhagic Telangiectasia Syndrome	monocyte	0.154799	1	0.193	0.469333	0	0
175050	Juvenile Polyposis/hereditary Hemorrhagic Telangiectasia Syndrome	myeloid progenitor	0.363836	1	0.241	0.469333	0	0
175050	Juvenile Polyposis/hereditary Hemorrhagic Telangiectasia Syndrome	naive b cell	1.41768	1	0.057	0.469333	0	0
175050	Juvenile Polyposis/hereditary Hemorrhagic Telangiectasia Syndrome	nampt neutrophil	-0.254836	1	0.619	0.900364	0	0
175050	Juvenile Polyposis/hereditary Hemorrhagic Telangiectasia Syndrome	neutrophil	1.66426	1	0.061	0.469333	0	0
175050	Juvenile Polyposis/hereditary Hemorrhagic Telangiectasia Syndrome	nk cell	1.09974	1	0.142	0.469333	0	0
175050	Juvenile Polyposis/hereditary Hemorrhagic Telangiectasia Syndrome	plasma cell	-2.18897	1	0.996	1	0	0
175200	Peutz-jeghers Syndrome	cd4-positive, alpha-beta t cell	-0.0916805	1	0.714	0.861	0	0
175200	Peutz-jeghers Syndrome	cd8-positive, alpha-beta t cell	-0.0293665	1	0.756	0.861	0	0
175200	Peutz-jeghers Syndrome	cd24 neutrophil	-0.349077	1	0.687	0.861	0	0
175200	Peutz-jeghers Syndrome	erythrocyte	3.59112	1	0.008	0.128	0	0
175200	Peutz-jeghers Syndrome	erythroid progenitor	0.288229	1	0.211	0.861	0	0
175200	Peutz-jeghers Syndrome	granulocyte	-0.0834132	1	0.705	0.861	0	0
175200	Peutz-jeghers Syndrome	hematopoietic stem cell	-0.337314	1	0.83	0.861	0	0
175200	Peutz-jeghers Syndrome	macrophage	0.138013	1	0.163	0.861	0	0
175200	Peutz-jeghers Syndrome	memory b cell	-0.28567	1	0.748	0.861	0	0
175200	Peutz-jeghers Syndrome	monocyte	-0.116213	1	0.72	0.861	0	0
175200	Peutz-jeghers Syndrome	myeloid progenitor	-0.0966955	1	0.741	0.861	0	0
175200	Peutz-jeghers Syndrome	naive b cell	-0.608421	1	0.861	0.861	0	0
175200	Peutz-jeghers Syndrome	nampt neutrophil	-0.600404	1	0.693	0.861	0	0
175200	Peutz-jeghers Syndrome	neutrophil	-0.466862	1	0.653	0.861	0	0
175200	Peutz-jeghers Syndrome	nk cell	-0.127264	1	0.809	0.861	0	0
175200	Peutz-jeghers Syndrome	plasma cell	-0.824981	1	0.734	0.861	0	0
PS175780	Brain small vessel disease	cd4-positive, alpha-beta t cell	-0.846257	1	0.987	0.987	0	0
PS175780	Brain small vessel disease	cd8-positive, alpha-beta t cell	-0.563209	1	0.941	0.987	0	0
PS175780	Brain small vessel disease	cd24 neutrophil	0.0191287	1	0.188	0.501333	0	0
PS175780	Brain small vessel disease	erythrocyte	-1.18168	1	0.798	0.987	0	0
PS175780	Brain small vessel disease	erythroid progenitor	-0.357748	1	0.782	0.987	0	0
PS175780	Brain small vessel disease	granulocyte	1.19621	1	0.061	0.325333	0	0
PS175780	Brain small vessel disease	hematopoietic stem cell	-0.322649	1	0.822	0.987	0	0
PS175780	Brain small vessel disease	macrophage	2.17359	1	0.017	0.136	0	0
PS175780	Brain small vessel disease	memory b cell	-0.543905	1	0.917	0.987	0	0
PS175780	Brain small vessel disease	monocyte	1.58336	1	0.017	0.136	0	0
PS175780	Brain small vessel disease	myeloid progenitor	-0.16045	1	0.755	0.987	0	0
PS175780	Brain small vessel disease	naive b cell	-0.427341	1	0.797	0.987	0	0
PS175780	Brain small vessel disease	nampt neutrophil	0.124862	1	0.149	0.4768	0	0
PS175780	Brain small vessel disease	neutrophil	1.11962	1	0.106	0.424	0	0
PS175780	Brain small vessel disease	nk cell	-0.547881	1	0.959	0.987	0	0
PS175780	Brain small vessel disease	plasma cell	-1.26565	1	0.902	0.987	0	0
PS188050	Thrombophilia	cd4-positive, alpha-beta t cell	-0.445468	3	0.95	0.984	0	0
PS188050	Thrombophilia	cd8-positive, alpha-beta t cell	-0.430554	3	0.967	0.984	0	0
PS188050	Thrombophilia	cd24 neutrophil	-0.278306	3	0.709	0.984	0	0	0
PS188050	Thrombophilia	erythrocyte	-0.431313	3	0.535	0.984	0	0
PS188050	Thrombophilia	erythroid progenitor	-0.423164	3	0.903	0.984	0	0
PS188050	Thrombophilia	granulocyte	-0.386591	3	0.967	0.984	0	0
PS188050	Thrombophilia	hematopoietic stem cell	-0.425418	3	0.948	0.984	0	0
PS188050	Thrombophilia	macrophage	-0.145918	3	0.727	0.984	0	0
PS188050	Thrombophilia	memory b cell	-0.424606	3	0.914	0.984	0	0
PS188050	Thrombophilia	monocyte	0.253556	3	0.062	0.984	0	1
PS188050	Thrombophilia	myeloid progenitor	-0.306496	3	0.911	0.984	0	0
PS188050	Thrombophilia	naive b cell	-0.453249	3	0.91	0.984	0	0
PS188050	Thrombophilia	nampt neutrophil	-0.401817	3	0.708	0.984	0	0
PS188050	Thrombophilia	neutrophil	-0.339975	3	0.672	0.984	0	0
PS188050	Thrombophilia	nk cell	-0.44989	3	0.984	0.984	0	0
PS188050	Thrombophilia	plasma cell	-0.468212	3	0.582	0.984	0	0
PS177000	Protoporphyria, erythropoietic	cd4-positive, alpha-beta t cell	-0.315866	3	0.891	0.95	0	0
PS177000	Protoporphyria, erythropoietic	cd8-positive, alpha-beta t cell	-0.294244	3	0.918	0.95	0	0
PS177000	Protoporphyria, erythropoietic	cd24 neutrophil	-0.281367	3	0.75	0.95	0	0
PS177000	Protoporphyria, erythropoietic	erythrocyte	3.66073	3	0	0	1	1
PS177000	Protoporphyria, erythropoietic	erythroid progenitor	0.238689	3	0.141	0.95	0	0
PS177000	Protoporphyria, erythropoietic	granulocyte	-0.293691	3	0.907	0.95	0	0
PS177000	Protoporphyria, erythropoietic	hematopoietic stem cell	-0.284218	3	0.895	0.95	0	0
PS177000	Protoporphyria, erythropoietic	macrophage	-0.30573	3	0.799	0.95	0	0
PS177000	Protoporphyria, erythropoietic	memory b cell	-0.319489	3	0.843	0.95	0	0
PS177000	Protoporphyria, erythropoietic	monocyte	-0.30761	3	0.926	0.95	0	0
PS177000	Protoporphyria, erythropoietic	myeloid progenitor	-0.151458	3	0.838	0.95	0	0
PS177000	Protoporphyria, erythropoietic	naive b cell	-0.283685	3	0.819	0.95	0	0
PS177000	Protoporphyria, erythropoietic	nampt neutrophil	-0.342836	3	0.68	0.95	0	0
PS177000	Protoporphyria, erythropoietic	neutrophil	-0.280691	3	0.686	0.95	0	0
PS177000	Protoporphyria, erythropoietic	nk cell	-0.282011	3	0.95	0.95	0	0
PS177000	Protoporphyria, erythropoietic	plasma cell	-0.327024	3	0.498	0.95	0	0
PS178600	Pulmonary hypertension, primary	cd4-positive, alpha-beta t cell	-0.593426	1	0.933	0.98	0	0
PS178600	Pulmonary hypertension, primary	cd8-positive, alpha-beta t cell	0.132097	1	0.301	0.602	0	0
PS178600	Pulmonary hypertension, primary	cd24 neutrophil	-0.66702	1	0.811	0.98	0	0
PS178600	Pulmonary hypertension, primary	erythrocyte	0.358129	1	0.046	0.288	0	0	0
PS178600	Pulmonary hypertension, primary	erythroid progenitor	-1.03151	1	0.98	0.98	0	0
PS178600	Pulmonary hypertension, primary	granulocyte	0.0945649	1	0.261	0.601143	0	0
PS178600	Pulmonary hypertension, primary	hematopoietic stem cell	0.154358	1	0.263	0.601143	0	0
PS178600	Pulmonary hypertension, primary	macrophage	-0.130376	1	0.649	0.98	0	0
PS178600	Pulmonary hypertension, primary	memory b cell	1.01445	1	0.054	0.288	0	0
PS178600	Pulmonary hypertension, primary	monocyte	2.73429	1	0	0	1	0
PS178600	Pulmonary hypertension, primary	myeloid progenitor	-0.763201	1	0.963	0.98	0	0
PS178600	Pulmonary hypertension, primary	naive b cell	0.0859494	1	0.232	0.601143	0	0
PS178600	Pulmonary hypertension, primary	nampt neutrophil	-0.415803	1	0.651	0.98	0	0
PS178600	Pulmonary hypertension, primary	neutrophil	-0.832796	1	0.781	0.98	0	0
PS178600	Pulmonary hypertension, primary	nk cell	1.14915	1	0.142	0.568	0	0
PS178600	Pulmonary hypertension, primary	plasma cell	-1.28886	1	0.918	0.98	0	0
180200	Retinoblastoma	cd4-positive, alpha-beta t cell	-1.17453	1	1	1	0	0
180200	Retinoblastoma	cd8-positive, alpha-beta t cell	-0.364465	1	0.869	0.993143	0	0
180200	Retinoblastoma	cd24 neutrophil	0.261632	1	0.164	0.437333	0	0
180200	Retinoblastoma	erythrocyte	-1.10693	1	0.763	0.993143	0	0
180200	Retinoblastoma	erythroid progenitor	-0.336725	1	0.769	0.993143	0	0
180200	Retinoblastoma	granulocyte	0.0606001	1	0.254	0.580571	0	0
180200	Retinoblastoma	hematopoietic stem cell	-1.24217	1	1	1	0	0
180200	Retinoblastoma	macrophage	-0.132546	1	0.671	0.993143	0	0
180200	Retinoblastoma	memory b cell	0.680592	1	0.092	0.437333	0	0
180200	Retinoblastoma	monocyte	0.838416	1	0.083	0.437333	0	0
180200	Retinoblastoma	myeloid progenitor	-0.0221718	1	0.726	0.993143	0	0
180200	Retinoblastoma	naive b cell	2.65045	1	0.016	0.256	0	0
180200	Retinoblastoma	nampt neutrophil	0.0996058	1	0.155	0.437333	0	0
180200	Retinoblastoma	neutrophil	0.998536	1	0.126	0.437333	0	0
180200	Retinoblastoma	nk cell	-0.0641639	1	0.799	0.993143	0	0
180200	Retinoblastoma	plasma cell	-1.14613	1	0.864	0.993143	0	0
181000	Sarcoidosis, Susceptibility To, 1	cd4-positive, alpha-beta t cell	-0.655278	1	0.962	0.972	0	0
181000	Sarcoidosis, Susceptibility To, 1	cd8-positive, alpha-beta t cell	-0.424504	1	0.904	0.972	0	0
181000	Sarcoidosis, Susceptibility To, 1	cd24 neutrophil	-0.681572	1	0.799	0.972	0	0
181000	Sarcoidosis, Susceptibility To, 1	erythrocyte	-0.676392	1	0.628	0.972	0	0
181000	Sarcoidosis, Susceptibility To, 1	erythroid progenitor	-0.589261	1	0.865	0.972	0	0
181000	Sarcoidosis, Susceptibility To, 1	granulocyte	0.322665	1	0.215	0.7168	0	0
181000	Sarcoidosis, Susceptibility To, 1	hematopoietic stem cell	0.0428362	1	0.288	0.768	0	0
181000	Sarcoidosis, Susceptibility To, 1	macrophage	2.19856	1	0.018	0.144	0	0
181000	Sarcoidosis, Susceptibility To, 1	memory b cell	1.81725	1	0.013	0.144	0	0
181000	Sarcoidosis, Susceptibility To, 1	monocyte	0.0261592	1	0.224	0.7168	0	0
181000	Sarcoidosis, Susceptibility To, 1	myeloid progenitor	-0.492563	1	0.882	0.972	0	0
181000	Sarcoidosis, Susceptibility To, 1	naive b cell	1.71414	1	0.051	0.272	0	0
181000	Sarcoidosis, Susceptibility To, 1	nampt neutrophil	-0.683394	1	0.71	0.972	0	0
181000	Sarcoidosis, Susceptibility To, 1	neutrophil	-0.683394	1	0.728	0.972	0	0
181000	Sarcoidosis, Susceptibility To, 1	nk cell	-0.600636	1	0.972	0.972	0	0
181000	Sarcoidosis, Susceptibility To, 1	plasma cell	-0.634614	1	0.644	0.972	0	0
PS300751	Anemia, Sideroblastic	cd4-positive, alpha-beta t cell	-0.11071	4	0.754	0.96	0	0
PS300751	Anemia, Sideroblastic	cd8-positive, alpha-beta t cell	0.0300217	4	0.374	0.96	0	0
PS300751	Anemia, Sideroblastic	cd24 neutrophil	-0.626313	4	0.923	0.96	0	0
PS300751	Anemia, Sideroblastic	erythrocyte	2.68285	4	0	0	1	0
PS300751	Anemia, Sideroblastic	erythroid progenitor	1.17424	4	0.015	0.12	0	1
PS300751	Anemia, Sideroblastic	granulocyte	-0.223635	4	0.922	0.96	0	0
PS300751	Anemia, Sideroblastic	hematopoietic stem cell	0.0149583	4	0.283	0.9056	0	0
PS300751	Anemia, Sideroblastic	macrophage	-0.446135	4	0.945	0.96	0	0
PS300751	Anemia, Sideroblastic	memory b cell	-0.215287	4	0.825	0.96	0	0
PS300751	Anemia, Sideroblastic	monocyte	-0.303844	4	0.96	0.96	0	0
PS300751	Anemia, Sideroblastic	myeloid progenitor	0.118496	4	0.265	0.9056	0	0
PS300751	Anemia, Sideroblastic	naive b cell	-0.273951	4	0.865	0.96	0	0
PS300751	Anemia, Sideroblastic	nampt neutrophil	-0.850496	4	0.927	0.96	0	0
PS300751	Anemia, Sideroblastic	neutrophil	-0.843087	4	0.93	0.96	0	0
PS300751	Anemia, Sideroblastic	nk cell	0.285254	4	0.257	0.9056	0	0
PS300751	Anemia, Sideroblastic	plasma cell	-0.56258	4	0.729	0.96	0	0
182900	Spherocytosis, Hereditary	cd4-positive, alpha-beta t cell	-0.366349	1	0.823	0.907	0	0
182900	Spherocytosis, Hereditary	cd8-positive, alpha-beta t cell	-0.385526	1	0.868	0.907	0	0
182900	Spherocytosis, Hereditary	cd24 neutrophil	-0.377035	1	0.704	0.907	0	0
182900	Spherocytosis, Hereditary	erythrocyte	3.49431	1	0.01	0.16	0	1
182900	Spherocytosis, Hereditary	erythroid progenitor	0.979484	1	0.114	0.907	0	0
182900	Spherocytosis, Hereditary	granulocyte	-0.379421	1	0.86	0.907	0	0
182900	Spherocytosis, Hereditary	hematopoietic stem cell	-0.338695	1	0.831	0.907	0	0
182900	Spherocytosis, Hereditary	macrophage	-0.385526	1	0.785	0.907	0	0
182900	Spherocytosis, Hereditary	memory b cell	-0.354846	1	0.772	0.907	0	0
182900	Spherocytosis, Hereditary	monocyte	-0.363807	1	0.869	0.907	0	0
182900	Spherocytosis, Hereditary	myeloid progenitor	0.280183	1	0.257	0.907	0	0
182900	Spherocytosis, Hereditary	naive b cell	-0.26523	1	0.731	0.907	0	0
182900	Spherocytosis, Hereditary	nampt neutrophil	-0.385526	1	0.597	0.907	0	0
182900	Spherocytosis, Hereditary	neutrophil	-0.385526	1	0.649	0.907	0	0
182900	Spherocytosis, Hereditary	nk cell	-0.381997	1	0.907	0.907	0	0
182900	Spherocytosis, Hereditary	plasma cell	-0.38449	1	0.501	0.907	0	0
185000	Overhydrated Hereditary Stomatocytosis	cd4-positive, alpha-beta t cell	-0.32727	1	0.816	0.888	0	0
185000	Overhydrated Hereditary Stomatocytosis	cd8-positive, alpha-beta t cell	-0.331506	1	0.849	0.888	0	0
185000	Overhydrated Hereditary Stomatocytosis	cd24 neutrophil	-0.329791	1	0.699	0.888	0	0
185000	Overhydrated Hereditary Stomatocytosis	erythrocyte	3.62166	1	0.007	0.112	0	0
185000	Overhydrated Hereditary Stomatocytosis	erythroid progenitor	0.697616	1	0.154	0.888	0	0
185000	Overhydrated Hereditary Stomatocytosis	granulocyte	-0.330373	1	0.825	0.888	0	0
185000	Overhydrated Hereditary Stomatocytosis	hematopoietic stem cell	-0.319618	1	0.821	0.888	0	0
185000	Overhydrated Hereditary Stomatocytosis	macrophage	-0.33042	1	0.729	0.888	0	0
185000	Overhydrated Hereditary Stomatocytosis	memory b cell	-0.32889	1	0.753	0.888	0	0
185000	Overhydrated Hereditary Stomatocytosis	monocyte	-0.324212	1	0.836	0.888	0	0
185000	Overhydrated Hereditary Stomatocytosis	myeloid progenitor	-0.0647692	1	0.715	0.888	0	0
185000	Overhydrated Hereditary Stomatocytosis	naive b cell	-0.331506	1	0.748	0.888	0	0
185000	Overhydrated Hereditary Stomatocytosis	nampt neutrophil	-0.329019	1	0.586	0.888	0	0
185000	Overhydrated Hereditary Stomatocytosis	neutrophil	-0.312949	1	0.611	0.888	0	0
185000	Overhydrated Hereditary Stomatocytosis	nk cell	-0.328307	1	0.888	0.888	0	0
185000	Overhydrated Hereditary Stomatocytosis	plasma cell	-0.330645	1	0.523	0.888	0	0
185020	Cryohydrocytosis	cd4-positive, alpha-beta t cell	-0.271504	1	0.8	0.871467	0	0
185020	Cryohydrocytosis	cd8-positive, alpha-beta t cell	-0.275463	1	0.817	0.871467	0	0
185020	Cryohydrocytosis	cd24 neutrophil	-0.271362	1	0.633	0.871467	0	0
185020	Cryohydrocytosis	erythrocyte	3.73298	1	0.003	0.048	1	0
185020	Cryohydrocytosis	erythroid progenitor	0.107214	1	0.235	0.871467	0	0
185020	Cryohydrocytosis	granulocyte	-0.273479	1	0.798	0.871467	0	0
185020	Cryohydrocytosis	hematopoietic stem cell	-0.275533	1	0.768	0.871467	0	0
185020	Cryohydrocytosis	macrophage	-0.274232	1	0.726	0.871467	0	0
185020	Cryohydrocytosis	memory b cell	-0.27539	1	0.755	0.871467	0	0
185020	Cryohydrocytosis	monocyte	-0.274677	1	0.817	0.871467	0	0
185020	Cryohydrocytosis	myeloid progenitor	-0.273258	1	0.787	0.871467	0	0
185020	Cryohydrocytosis	naive b cell	-0.276267	1	0.763	0.871467	0	0
185020	Cryohydrocytosis	nampt neutrophil	-0.271589	1	0.634	0.871467	0	0
185020	Cryohydrocytosis	neutrophil	-0.276267	1	0.626	0.871467	0	0
185020	Cryohydrocytosis	nk cell	-0.275353	1	0.882	0.882	0	0
185020	Cryohydrocytosis	plasma cell	-0.275816	1	0.48	0.871467	0	0
185070	Stormorken Syndrome	cd4-positive, alpha-beta t cell	0.569803	1	0.118	0.3808	0	0
185070	Stormorken Syndrome	cd8-positive, alpha-beta t cell	0.737872	1	0.195	0.445714	0	0
185070	Stormorken Syndrome	cd24 neutrophil	1.34463	1	0.087	0.3808	0	0
185070	Stormorken Syndrome	erythrocyte	-1.92457	1	0.979	0.979	0	0
185070	Stormorken Syndrome	erythroid progenitor	-0.755283	1	0.919	0.979	0	0
185070	Stormorken Syndrome	granulocyte	-0.404122	1	0.872	0.979	0	0
185070	Stormorken Syndrome	hematopoietic stem cell	-0.19347	1	0.776	0.979	0	0
185070	Stormorken Syndrome	macrophage	-0.628409	1	0.873	0.979	0	0
185070	Stormorken Syndrome	memory b cell	-0.251472	1	0.735	0.979	0	0
185070	Stormorken Syndrome	monocyte	-0.51435	1	0.937	0.979	0	0
185070	Stormorken Syndrome	myeloid progenitor	-0.168343	1	0.755	0.979	0	0
185070	Stormorken Syndrome	naive b cell	0.32102	1	0.181	0.445714	0	0
185070	Stormorken Syndrome	nampt neutrophil	1.09552	1	0.107	0.3808	0	0
185070	Stormorken Syndrome	neutrophil	0.9653	1	0.119	0.3808	0	0
185070	Stormorken Syndrome	nk cell	1.45902	1	0.092	0.3808	0	0
185070	Stormorken Syndrome	plasma cell	-1.65315	1	0.962	0.979	0	0
PS187300	Telangiectasia, hereditary hemorrhagic	cd4-positive, alpha-beta t cell	-0.286652	1	0.785	0.9088	0	0
PS187300	Telangiectasia, hereditary hemorrhagic	cd8-positive, alpha-beta t cell	0.0449456	1	0.31	0.708571	0	0
PS187300	Telangiectasia, hereditary hemorrhagic	cd24 neutrophil	-0.793893	1	0.852	0.9088	0	0
PS187300	Telangiectasia, hereditary hemorrhagic	erythrocyte	-0.761767	1	0.663	0.9088	0	0
PS187300	Telangiectasia, hereditary hemorrhagic	erythroid progenitor	3.09897	1	0.002	0.032	1	0
PS187300	Telangiectasia, hereditary hemorrhagic	granulocyte	-0.605664	1	0.948	0.948	0	0
PS187300	Telangiectasia, hereditary hemorrhagic	hematopoietic stem cell	0.220694	1	0.228	0.661333	0	0
PS187300	Telangiectasia, hereditary hemorrhagic	macrophage	0.0977644	1	0.173	0.661333	0	0
PS187300	Telangiectasia, hereditary hemorrhagic	memory b cell	-0.397777	1	0.808	0.9088	0	0
PS187300	Telangiectasia, hereditary hemorrhagic	monocyte	1.15856	1	0.038	0.304	0	0
PS187300	Telangiectasia, hereditary hemorrhagic	myeloid progenitor	0.214908	1	0.248	0.661333	0	0
PS187300	Telangiectasia, hereditary hemorrhagic	naive b cell	-0.2347	1	0.682	0.9088	0	0
PS187300	Telangiectasia, hereditary hemorrhagic	nampt neutrophil	-0.770756	1	0.742	0.9088	0	0
PS187300	Telangiectasia, hereditary hemorrhagic	neutrophil	-0.717881	1	0.706	0.9088	0	0
PS187300	Telangiectasia, hereditary hemorrhagic	nk cell	0.548462	1	0.247	0.661333	0	0
PS187300	Telangiectasia, hereditary hemorrhagic	plasma cell	-0.815213	1	0.726	0.9088	0	0
PS187950	Thrombocythemia	cd4-positive, alpha-beta t cell	-0.490489	2	0.968	0.988	0	0
PS187950	Thrombocythemia	cd8-positive, alpha-beta t cell	-0.405925	2	0.97	0.988	0	0
PS187950	Thrombocythemia	cd24 neutrophil	0.744987	2	0.108	0.432	0	0
PS187950	Thrombocythemia	erythrocyte	-0.424718	2	0.455	0.988	0	0
PS187950	Thrombocythemia	erythroid progenitor	0.0529935	2	0.392	0.988	0	1
PS187950	Thrombocythemia	granulocyte	-0.227047	2	0.839	0.988	0	0
PS187950	Thrombocythemia	hematopoietic stem cell	1.53758	2	0.014	0.224	0	0
PS187950	Thrombocythemia	macrophage	-0.247907	2	0.709	0.988	0	0
PS187950	Thrombocythemia	memory b cell	-0.475641	2	0.947	0.988	0	0
PS187950	Thrombocythemia	monocyte	-0.0699724	2	0.627	0.988	0	0
PS187950	Thrombocythemia	myeloid progenitor	-0.223992	2	0.795	0.988	0	1
PS187950	Thrombocythemia	naive b cell	-0.407606	2	0.886	0.988	0	0
PS187950	Thrombocythemia	nampt neutrophil	0.745736	2	0.104	0.432	0	0
PS187950	Thrombocythemia	neutrophil	0.931096	2	0.076	0.432	0	0
PS187950	Thrombocythemia	nk cell	-0.478502	2	0.988	0.988	0	0
PS187950	Thrombocythemia	plasma cell	-0.560596	2	0.642	0.988	0	0
PS313900	Thrombocytopenia	cd4-positive, alpha-beta t cell	0.20264	6	0.04	0.176	0	0
PS313900	Thrombocytopenia	cd8-positive, alpha-beta t cell	0.211694	6	0.151	0.345143	0	0
PS313900	Thrombocytopenia	cd24 neutrophil	-0.0936872	6	0.627	0.991	0	0
PS313900	Thrombocytopenia	erythrocyte	-1.18759	6	0.975	0.991	0	0
PS313900	Thrombocytopenia	erythroid progenitor	-0.0992751	6	0.77	0.991	0	0
PS313900	Thrombocytopenia	granulocyte	0.128406	6	0.128	0.345143	0	0
PS313900	Thrombocytopenia	hematopoietic stem cell	-0.433178	6	0.991	0.991	0	0
PS313900	Thrombocytopenia	macrophage	-0.0410422	6	0.621	0.991	0	0
PS313900	Thrombocytopenia	memory b cell	-0.0259306	6	0.688	0.991	0	0
PS313900	Thrombocytopenia	monocyte	0.18708	6	0.044	0.176	0	0
PS313900	Thrombocytopenia	myeloid progenitor	0.558832	6	0.04	0.176	0	0
PS313900	Thrombocytopenia	naive b cell	-0.415426	6	0.96	0.991	0	0
PS313900	Thrombocytopenia	nampt neutrophil	-0.327459	6	0.708	0.991	0	0
PS313900	Thrombocytopenia	neutrophil	0.479474	6	0.03	0.176	0	0
PS313900	Thrombocytopenia	nk cell	0.389267	6	0.143	0.345143	0	0
PS313900	Thrombocytopenia	plasma cell	-0.904213	6	0.95	0.991	0	0
191900	Muckle-wells Syndrome	cd4-positive, alpha-beta t cell	-0.37883	1	0.832	0.946	0	0
191900	Muckle-wells Syndrome	cd8-positive, alpha-beta t cell	-0.575413	1	0.946	0.946	0	0
191900	Muckle-wells Syndrome	cd24 neutrophil	-0.529563	1	0.756	0.946	0	0
191900	Muckle-wells Syndrome	erythrocyte	-0.656964	1	0.63	0.946	0	0
191900	Muckle-wells Syndrome	erythroid progenitor	-0.617489	1	0.872	0.946	0	0
191900	Muckle-wells Syndrome	granulocyte	1.52445	1	0.035	0.192	0	0
191900	Muckle-wells Syndrome	hematopoietic stem cell	-0.248478	1	0.796	0.946	0	0
191900	Muckle-wells Syndrome	macrophage	1.97427	1	0.036	0.192	0	0
191900	Muckle-wells Syndrome	memory b cell	-0.623988	1	0.92	0.946	0	0
191900	Muckle-wells Syndrome	monocyte	1.96638	1	0.01	0.16	0	0
191900	Muckle-wells Syndrome	myeloid progenitor	-0.539275	1	0.909	0.946	0	0
191900	Muckle-wells Syndrome	naive b cell	-0.656964	1	0.916	0.946	0	0
191900	Muckle-wells Syndrome	nampt neutrophil	1.08309	1	0.093	0.372	0	0
191900	Muckle-wells Syndrome	neutrophil	-0.555331	1	0.687	0.946	0	0
191900	Muckle-wells Syndrome	nk cell	-0.515661	1	0.941	0.946	0	0
191900	Muckle-wells Syndrome	plasma cell	-0.650237	1	0.639	0.946	0	0
193220	Vitreoretinochoroidopathy	cd4-positive, alpha-beta t cell	-0.264977	1	0.762	0.946	0	0
193220	Vitreoretinochoroidopathy	cd8-positive, alpha-beta t cell	-0.43486	1	0.88	0.946	0	0
193220	Vitreoretinochoroidopathy	cd24 neutrophil	0.22491	1	0.175	0.7	0	0
193220	Vitreoretinochoroidopathy	erythrocyte	-0.550209	1	0.566	0.946	0	0
193220	Vitreoretinochoroidopathy	erythroid progenitor	-0.506205	1	0.834	0.946	0	0
193220	Vitreoretinochoroidopathy	granulocyte	-0.493844	1	0.932	0.946	0	0
193220	Vitreoretinochoroidopathy	hematopoietic stem cell	-0.23974	1	0.79	0.946	0	0
193220	Vitreoretinochoroidopathy	macrophage	0.410971	1	0.121	0.645333	0	0
193220	Vitreoretinochoroidopathy	memory b cell	-0.503492	1	0.871	0.946	0	0
193220	Vitreoretinochoroidopathy	monocyte	-0.0486551	1	0.677	0.946	0	0
193220	Vitreoretinochoroidopathy	myeloid progenitor	-0.531809	1	0.904	0.946	0	0
193220	Vitreoretinochoroidopathy	naive b cell	-0.689409	1	0.917	0.946	0	0
193220	Vitreoretinochoroidopathy	nampt neutrophil	2.60561	1	0.015	0.24	0	0
193220	Vitreoretinochoroidopathy	neutrophil	2.25327	1	0.035	0.28	0	0
193220	Vitreoretinochoroidopathy	nk cell	-0.510582	1	0.946	0.946	0	0
193220	Vitreoretinochoroidopathy	plasma cell	-0.720973	1	0.684	0.946	0	0
193300	Von Hippel-lindau Syndrome	cd4-positive, alpha-beta t cell	0.130632	1	0.225	0.4	0	0
193300	Von Hippel-lindau Syndrome	cd8-positive, alpha-beta t cell	1.10198	1	0.107	0.4	0	0
193300	Von Hippel-lindau Syndrome	cd24 neutrophil	1.01482	1	0.102	0.4	0	0
193300	Von Hippel-lindau Syndrome	erythrocyte	-2.04757	1	0.984	0.984	0	0
193300	Von Hippel-lindau Syndrome	erythroid progenitor	-0.0997264	1	0.679	0.905333	0	0
193300	Von Hippel-lindau Syndrome	granulocyte	0.156024	1	0.248	0.4	0	0
193300	Von Hippel-lindau Syndrome	hematopoietic stem cell	0.127752	1	0.25	0.4	0	0
193300	Von Hippel-lindau Syndrome	macrophage	0.455848	1	0.127	0.4	0	0
193300	Von Hippel-lindau Syndrome	memory b cell	0.082381	1	0.215	0.4	0	0
193300	Von Hippel-lindau Syndrome	monocyte	0.184119	1	0.179	0.4	0	0
193300	Von Hippel-lindau Syndrome	myeloid progenitor	0.159144	1	0.281	0.408727	0	0
193300	Von Hippel-lindau Syndrome	naive b cell	0.759296	1	0.12	0.4	0	0
193300	Von Hippel-lindau Syndrome	nampt neutrophil	-1.373	1	0.929	0.984	0	0
193300	Von Hippel-lindau Syndrome	neutrophil	-0.894091	1	0.787	0.968615	0	0
193300	Von Hippel-lindau Syndrome	nk cell	1.69144	1	0.082	0.4	0	0
193300	Von Hippel-lindau Syndrome	plasma cell	-1.44905	1	0.927	0.984	0	0
193400	Von Willebrand Disease	cd4-positive, alpha-beta t cell	-0.506862	1	0.908	0.958	0	0
193400	Von Willebrand Disease	cd8-positive, alpha-beta t cell	-0.509422	1	0.928	0.958	0	0
193400	Von Willebrand Disease	cd24 neutrophil	-0.481332	1	0.713	0.958	0	0
193400	Von Willebrand Disease	erythrocyte	-0.531581	1	0.573	0.958	0	0
193400	Von Willebrand Disease	erythroid progenitor	0.914917	1	0.118	0.472	0	0
193400	Von Willebrand Disease	granulocyte	-0.525073	1	0.927	0.958	0	0
193400	Von Willebrand Disease	hematopoietic stem cell	0.905155	1	0.091	0.472	0	0
193400	Von Willebrand Disease	macrophage	-0.497567	1	0.821	0.958	0	0
193400	Von Willebrand Disease	memory b cell	-0.476086	1	0.85	0.958	0	0
193400	Von Willebrand Disease	monocyte	1.38886	1	0.027	0.216	0	0
193400	Von Willebrand Disease	myeloid progenitor	2.88329	1	0.005	0.08	1	0
193400	Von Willebrand Disease	naive b cell	-0.531581	1	0.865	0.958	0	0
193400	Von Willebrand Disease	nampt neutrophil	-0.446132	1	0.677	0.958	0	0
193400	Von Willebrand Disease	neutrophil	-0.531581	1	0.69	0.958	0	0
193400	Von Willebrand Disease	nk cell	-0.531581	1	0.958	0.958	0	0
193400	Von Willebrand Disease	plasma cell	-0.523417	1	0.617	0.958	0	0
193670	Whim Syndrome	cd4-positive, alpha-beta t cell	1.33493	1	0.029	0.232	0	0
193670	Whim Syndrome	cd8-positive, alpha-beta t cell	1.80744	1	0.028	0.232	0	0
193670	Whim Syndrome	cd24 neutrophil	0.354179	1	0.149	0.365714	0	0
193670	Whim Syndrome	erythrocyte	-1.20185	1	0.83	0.995	0	0
193670	Whim Syndrome	erythroid progenitor	-1.22291	1	0.995	0.995	0	0
193670	Whim Syndrome	granulocyte	-0.353522	1	0.85	0.995	0	0
193670	Whim Syndrome	hematopoietic stem cell	-0.662081	1	0.947	0.995	0	0
193670	Whim Syndrome	macrophage	-0.95566	1	0.963	0.995	0	0
193670	Whim Syndrome	memory b cell	1.06601	1	0.056	0.298667	0	0
193670	Whim Syndrome	monocyte	-0.686937	1	0.984	0.995	0	0
193670	Whim Syndrome	myeloid progenitor	-0.960781	1	0.989	0.995	0	0
193670	Whim Syndrome	naive b cell	0.934346	1	0.106	0.365714	0	0
193670	Whim Syndrome	nampt neutrophil	-0.0173758	1	0.549	0.995	0	0
193670	Whim Syndrome	neutrophil	0.34345	1	0.152	0.365714	0	0
193670	Whim Syndrome	nk cell	1.07529	1	0.16	0.365714	0	0
193670	Whim Syndrome	plasma cell	-0.854539	1	0.766	0.995	0	0
194380	Dehydrated Hereditary Stomatocytosis With Or Without Pseudohyperkalemiaand/or Perinatal Edema	cd4-positive, alpha-beta t cell	-0.00751899	1	0.682	0.991	0	0
194380	Dehydrated Hereditary Stomatocytosis With Or Without Pseudohyperkalemiaand/or Perinatal Edema	cd8-positive, alpha-beta t cell	0.88027	1	0.144	0.329143	0	0
194380	Dehydrated Hereditary Stomatocytosis With Or Without Pseudohyperkalemiaand/or Perinatal Edema	cd24 neutrophil	-1.2714	1	0.979	0.991	0	0
194380	Dehydrated Hereditary Stomatocytosis With Or Without Pseudohyperkalemiaand/or Perinatal Edema	erythrocyte	-0.844753	1	0.685	0.991	0	0
194380	Dehydrated Hereditary Stomatocytosis With Or Without Pseudohyperkalemiaand/or Perinatal Edema	erythroid progenitor	1.19575	1	0.107	0.317333	0	0
194380	Dehydrated Hereditary Stomatocytosis With Or Without Pseudohyperkalemiaand/or Perinatal Edema	granulocyte	1.32607	1	0.06	0.317333	0	0
194380	Dehydrated Hereditary Stomatocytosis With Or Without Pseudohyperkalemiaand/or Perinatal Edema	hematopoietic stem cell	0.618201	1	0.119	0.317333	0	0
194380	Dehydrated Hereditary Stomatocytosis With Or Without Pseudohyperkalemiaand/or Perinatal Edema	macrophage	0.899867	1	0.081	0.317333	0	0
194380	Dehydrated Hereditary Stomatocytosis With Or Without Pseudohyperkalemiaand/or Perinatal Edema	memory b cell	-0.549543	1	0.883	0.991	0	0
194380	Dehydrated Hereditary Stomatocytosis With Or Without Pseudohyperkalemiaand/or Perinatal Edema	monocyte	0.613766	1	0.087	0.317333	0	0
194380	Dehydrated Hereditary Stomatocytosis With Or Without Pseudohyperkalemiaand/or Perinatal Edema	myeloid progenitor	1.24441	1	0.1	0.317333	0	0
194380	Dehydrated Hereditary Stomatocytosis With Or Without Pseudohyperkalemiaand/or Perinatal Edema	naive b cell	-1.22749	1	0.991	0.991	0	0
194380	Dehydrated Hereditary Stomatocytosis With Or Without Pseudohyperkalemiaand/or Perinatal Edema	nampt neutrophil	-1.40886	1	0.93	0.991	0	0
194380	Dehydrated Hereditary Stomatocytosis With Or Without Pseudohyperkalemiaand/or Perinatal Edema	neutrophil	-1.27603	1	0.908	0.991	0	0
194380	Dehydrated Hereditary Stomatocytosis With Or Without Pseudohyperkalemiaand/or Perinatal Edema	nk cell	0.176653	1	0.33	0.66	0	0
194380	Dehydrated Hereditary Stomatocytosis With Or Without Pseudohyperkalemiaand/or Perinatal Edema	plasma cell	-0.369384	1	0.523	0.929778	0	0
200150	Choreoacanthocytosis	cd4-positive, alpha-beta t cell	0.176429	1	0.187	0.427429	0	0
200150	Choreoacanthocytosis	cd8-positive, alpha-beta t cell	1.29759	1	0.09	0.402667	0	0
200150	Choreoacanthocytosis	cd24 neutrophil	0.643857	1	0.14	0.402667	0	0
200150	Choreoacanthocytosis	erythrocyte	0.181206	1	0.061	0.402667	0	0
200150	Choreoacanthocytosis	erythroid progenitor	1.02805	1	0.112	0.402667	0	0
200150	Choreoacanthocytosis	granulocyte	-0.33523	1	0.817	0.999	0	0
200150	Choreoacanthocytosis	hematopoietic stem cell	0.197877	1	0.234	0.468	0	0
200150	Choreoacanthocytosis	macrophage	-1.41559	1	0.999	0.999	0	0
200150	Choreoacanthocytosis	memory b cell	-0.327774	1	0.795	0.999	0	0
200150	Choreoacanthocytosis	monocyte	-0.563205	1	0.957	0.999	0	0
200150	Choreoacanthocytosis	myeloid progenitor	1.79743	1	0.039	0.402667	0	0
200150	Choreoacanthocytosis	naive b cell	-0.330715	1	0.763	0.999	0	0
200150	Choreoacanthocytosis	nampt neutrophil	-1.47202	1	0.964	0.999	0	0
200150	Choreoacanthocytosis	neutrophil	-0.711456	1	0.735	0.999	0	0
200150	Choreoacanthocytosis	nk cell	1.1765	1	0.151	0.402667	0	0
200150	Choreoacanthocytosis	plasma cell	-1.34295	1	0.936	0.999	0	0
PS202700	Neutropenia, severe congenital	cd4-positive, alpha-beta t cell	0.00166396	9	0.068	0.155429	0	0
PS202700	Neutropenia, severe congenital	cd8-positive, alpha-beta t cell	0.344518	9	0.048	0.128	0	0
PS202700	Neutropenia, severe congenital	cd24 neutrophil	-0.141848	9	0.782	0.983	0	0
PS202700	Neutropenia, severe congenital	erythrocyte	-1.12972	9	0.977	0.983	0	0
PS202700	Neutropenia, severe congenital	erythroid progenitor	-0.140078	9	0.921	0.983	0	0
PS202700	Neutropenia, severe congenital	granulocyte	0.187435	9	0.032	0.128	0	1
PS202700	Neutropenia, severe congenital	hematopoietic stem cell	0.179009	9	0.044	0.128	0	0
PS202700	Neutropenia, severe congenital	macrophage	0.272284	9	0.008	0.128	0	0
PS202700	Neutropenia, severe congenital	memory b cell	-0.288889	9	0.949	0.983	0	0
PS202700	Neutropenia, severe congenital	monocyte	-0.098594	9	0.928	0.983	0	0
PS202700	Neutropenia, severe congenital	myeloid progenitor	0.269982	9	0.043	0.128	0	1
PS202700	Neutropenia, severe congenital	naive b cell	-0.447976	9	0.983	0.983	0	0
PS202700	Neutropenia, severe congenital	nampt neutrophil	-0.591904	9	0.89	0.983	0	0
PS202700	Neutropenia, severe congenital	neutrophil	-0.580648	9	0.918	0.983	0	0
PS202700	Neutropenia, severe congenital	nk cell	0.841355	9	0.017	0.128	0	0
PS202700	Neutropenia, severe congenital	plasma cell	-0.489797	9	0.672	0.983	0	0
PS203300	Hermansky-Pudlak syndrome	cd4-positive, alpha-beta t cell	-0.231146	9	0.948	1	0	0
PS203300	Hermansky-Pudlak syndrome	cd8-positive, alpha-beta t cell	0.579328	9	0.016	0.0426667	0	0
PS203300	Hermansky-Pudlak syndrome	cd24 neutrophil	-0.550765	9	0.956	1	0	0
PS203300	Hermansky-Pudlak syndrome	erythrocyte	-1.34075	9	0.998	1	0	0
PS203300	Hermansky-Pudlak syndrome	erythroid progenitor	0.225918	9	0.04	0.0914286	0	0
PS203300	Hermansky-Pudlak syndrome	granulocyte	0.549549	9	0.003	0.012	0	0
PS203300	Hermansky-Pudlak syndrome	hematopoietic stem cell	-0.0585522	9	0.918	1	0	0
PS203300	Hermansky-Pudlak syndrome	macrophage	-0.267718	9	0.901	1	0	0
PS203300	Hermansky-Pudlak syndrome	memory b cell	0.330289	9	0.004	0.0128	0	0
PS203300	Hermansky-Pudlak syndrome	monocyte	0.404995	9	0.003	0.012	0	0
PS203300	Hermansky-Pudlak syndrome	myeloid progenitor	-0.0380301	9	0.924	1	0	0
PS203300	Hermansky-Pudlak syndrome	naive b cell	0.712377	9	0.001	0.012	0	0
PS203300	Hermansky-Pudlak syndrome	nampt neutrophil	-1.25103	9	1	1	0	0
PS203300	Hermansky-Pudlak syndrome	neutrophil	-1.02303	9	0.99	1	0	0
PS203300	Hermansky-Pudlak syndrome	nk cell	1.13168	9	0.002	0.012	1	0
PS203300	Hermansky-Pudlak syndrome	plasma cell	-1.16201	9	0.996	1	0	0
PS256730	Ceroid lipofuscinoses	cd4-positive, alpha-beta t cell	-0.00966205	1	0.684	0.996	0	0
PS256730	Ceroid lipofuscinoses	cd8-positive, alpha-beta t cell	1.18943	1	0.101	0.412	0	0
PS256730	Ceroid lipofuscinoses	cd24 neutrophil	0.400937	1	0.146	0.450667	0	0
PS256730	Ceroid lipofuscinoses	erythrocyte	-1.42347	1	0.877	0.996	0	0
PS256730	Ceroid lipofuscinoses	erythroid progenitor	-0.700247	1	0.907	0.996	0	0
PS256730	Ceroid lipofuscinoses	granulocyte	-0.30121	1	0.82	0.996	0	0
PS256730	Ceroid lipofuscinoses	hematopoietic stem cell	-0.477693	1	0.889	0.996	0	0
PS256730	Ceroid lipofuscinoses	macrophage	1.73522	1	0.024	0.384	0	0
PS256730	Ceroid lipofuscinoses	memory b cell	-0.904109	1	0.996	0.996	0	0
PS256730	Ceroid lipofuscinoses	monocyte	-0.135817	1	0.719	0.996	0	0
PS256730	Ceroid lipofuscinoses	myeloid progenitor	-0.936392	1	0.985	0.996	0	0
PS256730	Ceroid lipofuscinoses	naive b cell	0.339622	1	0.169	0.450667	0	0
PS256730	Ceroid lipofuscinoses	nampt neutrophil	0.972371	1	0.103	0.412	0	0
PS256730	Ceroid lipofuscinoses	neutrophil	-0.416872	1	0.675	0.996	0	0
PS256730	Ceroid lipofuscinoses	nk cell	1.81846	1	0.067	0.412	0	0
PS256730	Ceroid lipofuscinoses	plasma cell	-1.15056	1	0.876	0.996	0	0
PS206100	Anemia, hypochromic microcytic, with iron overload	cd4-positive, alpha-beta t cell	-0.545635	2	0.977	0.992	0	0
PS206100	Anemia, hypochromic microcytic, with iron overload	cd8-positive, alpha-beta t cell	-0.477715	2	0.983	0.992	0	0
PS206100	Anemia, hypochromic microcytic, with iron overload	cd24 neutrophil	-0.701697	2	0.92	0.992	0	0
PS206100	Anemia, hypochromic microcytic, with iron overload	erythrocyte	1.71926	2	0.019	0.152	0	0
PS206100	Anemia, hypochromic microcytic, with iron overload	erythroid progenitor	1.95452	2	0.007	0.112	0	0
PS206100	Anemia, hypochromic microcytic, with iron overload	granulocyte	0.26115	2	0.245	0.653333	0	0
PS206100	Anemia, hypochromic microcytic, with iron overload	hematopoietic stem cell	-0.0666978	2	0.663	0.992	0	0
PS206100	Anemia, hypochromic microcytic, with iron overload	macrophage	0.31318	2	0.179	0.6176	0	0
PS206100	Anemia, hypochromic microcytic, with iron overload	memory b cell	-0.574634	2	0.975	0.992	0	0
PS206100	Anemia, hypochromic microcytic, with iron overload	monocyte	0.263328	2	0.193	0.6176	0	0
PS206100	Anemia, hypochromic microcytic, with iron overload	myeloid progenitor	0.819585	2	0.133	0.6176	0	0
PS206100	Anemia, hypochromic microcytic, with iron overload	naive b cell	-0.550194	2	0.942	0.992	0	0
PS206100	Anemia, hypochromic microcytic, with iron overload	nampt neutrophil	-0.73782	2	0.834	0.992	0	0
PS206100	Anemia, hypochromic microcytic, with iron overload	neutrophil	-0.540467	2	0.707	0.992	0	0
PS206100	Anemia, hypochromic microcytic, with iron overload	nk cell	-0.501899	2	0.992	0.992	0	0
PS206100	Anemia, hypochromic microcytic, with iron overload	plasma cell	-0.634271	2	0.69	0.992	0	0
208400	Aspartylglucosaminuria	cd4-positive, alpha-beta t cell	0.288711	1	0.169	0.45	0	0
208400	Aspartylglucosaminuria	cd8-positive, alpha-beta t cell	1.24146	1	0.083	0.442667	0	0
208400	Aspartylglucosaminuria	cd24 neutrophil	-0.797548	1	0.841	0.988	0	0
208400	Aspartylglucosaminuria	erythrocyte	-1.68352	1	0.968	0.988	0	0
208400	Aspartylglucosaminuria	erythroid progenitor	-0.72197	1	0.919	0.988	0	0
208400	Aspartylglucosaminuria	granulocyte	0.256862	1	0.209	0.45	0	0
208400	Aspartylglucosaminuria	hematopoietic stem cell	-0.174866	1	0.75	0.988	0	0
208400	Aspartylglucosaminuria	macrophage	0.391323	1	0.15	0.45	0	0
208400	Aspartylglucosaminuria	memory b cell	0.0856249	1	0.207	0.45	0	0
208400	Aspartylglucosaminuria	monocyte	0.00895381	1	0.225	0.45	0	0
208400	Aspartylglucosaminuria	myeloid progenitor	-0.975944	1	0.988	0.988	0	0
208400	Aspartylglucosaminuria	naive b cell	2.18697	1	0.024	0.192	0	0
208400	Aspartylglucosaminuria	nampt neutrophil	-1.39036	1	0.935	0.988	0	0
208400	Aspartylglucosaminuria	neutrophil	-0.289616	1	0.613	0.9808	0	0
208400	Aspartylglucosaminuria	nk cell	0.526302	1	0.254	0.451556	0	0
208400	Aspartylglucosaminuria	plasma cell	1.04762	1	0.019	0.192	0	0
208900	Ataxia-telangiectasia	cd4-positive, alpha-beta t cell	0.551941	1	0.125	0.347429	0	0
208900	Ataxia-telangiectasia	cd8-positive, alpha-beta t cell	1.18424	1	0.094	0.347429	0	0
208900	Ataxia-telangiectasia	cd24 neutrophil	0.5047	1	0.152	0.347429	0	0
208900	Ataxia-telangiectasia	erythrocyte	-1.13009	1	0.772	0.991	0	0
208900	Ataxia-telangiectasia	erythroid progenitor	-0.912208	1	0.956	0.991	0	0
208900	Ataxia-telangiectasia	granulocyte	-0.818127	1	0.986	0.991	0	0
208900	Ataxia-telangiectasia	hematopoietic stem cell	-0.890972	1	0.991	0.991	0	0
208900	Ataxia-telangiectasia	macrophage	-0.696979	1	0.918	0.991	0	0
208900	Ataxia-telangiectasia	memory b cell	0.146481	1	0.207	0.414	0	0
208900	Ataxia-telangiectasia	monocyte	-0.547772	1	0.954	0.991	0	0
208900	Ataxia-telangiectasia	myeloid progenitor	-0.796407	1	0.96	0.991	0	0
208900	Ataxia-telangiectasia	naive b cell	0.576628	1	0.151	0.347429	0	0
208900	Ataxia-telangiectasia	nampt neutrophil	0.218964	1	0.131	0.347429	0	0
208900	Ataxia-telangiectasia	neutrophil	1.0344	1	0.114	0.347429	0	0
208900	Ataxia-telangiectasia	nk cell	2.42058	1	0.026	0.347429	0	0
208900	Ataxia-telangiectasia	plasma cell	-0.845375	1	0.736	0.991	0	0
209920	Bare Lymphocyte Syndrome, Type Ii	cd4-positive, alpha-beta t cell	-0.160215	4	0.787	0.986	0	0
209920	Bare Lymphocyte Syndrome, Type Ii	cd8-positive, alpha-beta t cell	0.00301841	4	0.379	0.758	0	0
209920	Bare Lymphocyte Syndrome, Type Ii	cd24 neutrophil	-0.722203	4	0.95	0.986	0	0
209920	Bare Lymphocyte Syndrome, Type Ii	erythrocyte	-0.643085	4	0.712	0.986	0	0
209920	Bare Lymphocyte Syndrome, Type Ii	erythroid progenitor	0.652711	4	0.06	0.2304	0	0
209920	Bare Lymphocyte Syndrome, Type Ii	granulocyte	0.0306301	4	0.292	0.667429	0	0
209920	Bare Lymphocyte Syndrome, Type Ii	hematopoietic stem cell	0.559431	4	0.034	0.181333	0	0
209920	Bare Lymphocyte Syndrome, Type Ii	macrophage	-0.376666	4	0.898	0.986	0	0
209920	Bare Lymphocyte Syndrome, Type Ii	memory b cell	0.796521	4	0.005	0.04	0	0
209920	Bare Lymphocyte Syndrome, Type Ii	monocyte	-0.076942	4	0.732	0.986	0	0
209920	Bare Lymphocyte Syndrome, Type Ii	myeloid progenitor	0.672882	4	0.072	0.2304	0	0
209920	Bare Lymphocyte Syndrome, Type Ii	naive b cell	1.36625	4	0.001	0.016	1	0
209920	Bare Lymphocyte Syndrome, Type Ii	nampt neutrophil	-0.812702	4	0.913	0.986	0	0
209920	Bare Lymphocyte Syndrome, Type Ii	neutrophil	-1.22695	4	0.986	0.986	0	0
209920	Bare Lymphocyte Syndrome, Type Ii	nk cell	0.669728	4	0.134	0.357333	0	0
209920	Bare Lymphocyte Syndrome, Type Ii	plasma cell	-0.988702	4	0.957	0.986	0	0
PS300755	Immunodeficiency (Select Examples)	cd4-positive, alpha-beta t cell	0.223512	44	0	0	0	0
PS300755	Immunodeficiency (Select Examples)	cd8-positive, alpha-beta t cell	0.555162	44	0	0	0	0
PS300755	Immunodeficiency (Select Examples)	cd24 neutrophil	-0.332915	44	0.994	1	0	0
PS300755	Immunodeficiency (Select Examples)	erythrocyte	-0.560765	44	0.844	1	0	0
PS300755	Immunodeficiency (Select Examples)	erythroid progenitor	-0.539415	44	1	1	0	0
PS300755	Immunodeficiency (Select Examples)	granulocyte	-0.384583	44	1	1	0	0
PS300755	Immunodeficiency (Select Examples)	hematopoietic stem cell	-0.396694	44	1	1	0	0
PS300755	Immunodeficiency (Select Examples)	macrophage	-0.376119	44	1	1	0	0
PS300755	Immunodeficiency (Select Examples)	memory b cell	-0.358397	44	1	1	0	0
PS300755	Immunodeficiency (Select Examples)	monocyte	-0.342202	44	1	1	0	0
PS300755	Immunodeficiency (Select Examples)	myeloid progenitor	-0.432071	44	1	1	0	0
PS300755	Immunodeficiency (Select Examples)	naive b cell	-0.371854	44	1	1	0	0
PS300755	Immunodeficiency (Select Examples)	nampt neutrophil	-0.377608	44	0.968	1	0	0
PS300755	Immunodeficiency (Select Examples)	neutrophil	-0.366368	44	0.982	1	0	0
PS300755	Immunodeficiency (Select Examples)	nk cell	0.504675	44	0.002	0.0106667	0	0
PS300755	Immunodeficiency (Select Examples)	plasma cell	-0.578599	44	0.959	1	0	0
210370	Bietti Crystalline Corneoretinal Dystrophy	cd4-positive, alpha-beta t cell	1.15518	1	0.036	0.266667	0	0
210370	Bietti Crystalline Corneoretinal Dystrophy	cd8-positive, alpha-beta t cell	1.60373	1	0.043	0.266667	0	0
210370	Bietti Crystalline Corneoretinal Dystrophy	cd24 neutrophil	-1.12961	1	0.939	0.939	0	0
210370	Bietti Crystalline Corneoretinal Dystrophy	erythrocyte	-1.22818	1	0.8	0.912	0	0
210370	Bietti Crystalline Corneoretinal Dystrophy	erythroid progenitor	0.398362	1	0.193	0.464	0	0
210370	Bietti Crystalline Corneoretinal Dystrophy	granulocyte	-0.0250182	1	0.689	0.912	0	0
210370	Bietti Crystalline Corneoretinal Dystrophy	hematopoietic stem cell	0.266515	1	0.232	0.464	0	0
210370	Bietti Crystalline Corneoretinal Dystrophy	macrophage	-0.402727	1	0.755	0.912	0	0
210370	Bietti Crystalline Corneoretinal Dystrophy	memory b cell	-0.332279	1	0.785	0.912	0	0
210370	Bietti Crystalline Corneoretinal Dystrophy	monocyte	0.148144	1	0.214	0.464	0	0
210370	Bietti Crystalline Corneoretinal Dystrophy	myeloid progenitor	0.593897	1	0.206	0.464	0	0
210370	Bietti Crystalline Corneoretinal Dystrophy	naive b cell	0.210349	1	0.198	0.464	0	0
210370	Bietti Crystalline Corneoretinal Dystrophy	nampt neutrophil	-1.0956	1	0.848	0.912	0	0
210370	Bietti Crystalline Corneoretinal Dystrophy	neutrophil	-1.22818	1	0.855	0.912	0	0
210370	Bietti Crystalline Corneoretinal Dystrophy	nk cell	1.96641	1	0.05	0.266667	0	0
210370	Bietti Crystalline Corneoretinal Dystrophy	plasma cell	-0.900997	1	0.783	0.912	0	0
PS210600	Seckel syndrome	cd4-positive, alpha-beta t cell	0.595457	1	0.109	0.436	0	0
PS210600	Seckel syndrome	cd8-positive, alpha-beta t cell	1.19186	1	0.099	0.436	0	0
PS210600	Seckel syndrome	cd24 neutrophil	-0.93825	1	0.902	0.936	0	0
PS210600	Seckel syndrome	erythrocyte	-1.10353	1	0.779	0.936	0	0
PS210600	Seckel syndrome	erythroid progenitor	-0.223108	1	0.734	0.936	0	0
PS210600	Seckel syndrome	granulocyte	0.167355	1	0.245	0.49	0	0
PS210600	Seckel syndrome	hematopoietic stem cell	-0.139949	1	0.763	0.936	0	0
PS210600	Seckel syndrome	macrophage	-0.639393	1	0.904	0.936	0	0
PS210600	Seckel syndrome	memory b cell	0.889542	1	0.065	0.436	0	0
PS210600	Seckel syndrome	monocyte	0.0422721	1	0.233	0.49	0	0
PS210600	Seckel syndrome	myeloid progenitor	0.42888	1	0.199	0.49	0	0
PS210600	Seckel syndrome	naive b cell	2.08127	1	0.037	0.436	0	0
PS210600	Seckel syndrome	nampt neutrophil	-1.3322	1	0.918	0.936	0	0
PS210600	Seckel syndrome	neutrophil	-1.39689	1	0.936	0.936	0	0
PS210600	Seckel syndrome	nk cell	1.05866	1	0.169	0.49	0	0
PS210600	Seckel syndrome	plasma cell	-0.681976	1	0.691	0.936	0	0
PS210900	Microcephaly, growth restriction and increased sister chromatid exchange	cd4-positive, alpha-beta t cell	-0.647628	1	0.955	0.955	0	0
PS210900	Microcephaly, growth restriction and increased sister chromatid exchange	cd8-positive, alpha-beta t cell	-0.519409	1	0.922	0.955	0	0
PS210900	Microcephaly, growth restriction and increased sister chromatid exchange	cd24 neutrophil	0.175132	1	0.172	0.584	0	0
PS210900	Microcephaly, growth restriction and increased sister chromatid exchange	erythrocyte	-1.1267	1	0.772	0.955	0	0
PS210900	Microcephaly, growth restriction and increased sister chromatid exchange	erythroid progenitor	1.23543	1	0.097	0.517333	0	0
PS210900	Microcephaly, growth restriction and increased sister chromatid exchange	granulocyte	2.43672	1	0.008	0.128	0	0
PS210900	Microcephaly, growth restriction and increased sister chromatid exchange	hematopoietic stem cell	-0.387935	1	0.848	0.955	0	0
PS210900	Microcephaly, growth restriction and increased sister chromatid exchange	macrophage	-0.179745	1	0.654	0.955	0	0
PS210900	Microcephaly, growth restriction and increased sister chromatid exchange	memory b cell	-0.146444	1	0.692	0.955	0	0
PS210900	Microcephaly, growth restriction and increased sister chromatid exchange	monocyte	0.14428	1	0.217	0.584	0	0
PS210900	Microcephaly, growth restriction and increased sister chromatid exchange	myeloid progenitor	1.60495	1	0.056	0.448	0	0
PS210900	Microcephaly, growth restriction and increased sister chromatid exchange	naive b cell	0.00414921	1	0.219	0.584	0	0
PS210900	Microcephaly, growth restriction and increased sister chromatid exchange	nampt neutrophil	-1.0809	1	0.833	0.955	0	0
PS210900	Microcephaly, growth restriction and increased sister chromatid exchange	neutrophil	-0.92924	1	0.795	0.955	0	0
PS210900	Microcephaly, growth restriction and increased sister chromatid exchange	nk cell	0.230312	1	0.314	0.717714	0	0
PS210900	Microcephaly, growth restriction and increased sister chromatid exchange	plasma cell	-0.812975	1	0.742	0.955	0	0
PS114580	Familial candidiasis	cd4-positive, alpha-beta t cell	0.518795	2	0.092	0.368	0	0
PS114580	Familial candidiasis	cd8-positive, alpha-beta t cell	0.309976	2	0.321	0.856	0	0
PS114580	Familial candidiasis	cd24 neutrophil	0.331606	2	0.21	0.672	0	0
PS114580	Familial candidiasis	erythrocyte	-1.32852	2	0.945	0.978	0	0
PS114580	Familial candidiasis	erythroid progenitor	-0.394208	2	0.85	0.978	0	0
PS114580	Familial candidiasis	granulocyte	1.06409	2	0.042	0.245333	0	0
PS114580	Familial candidiasis	hematopoietic stem cell	-0.376799	2	0.933	0.978	0	0
PS114580	Familial candidiasis	macrophage	1.33113	2	0.019	0.245333	0	0
PS114580	Familial candidiasis	memory b cell	-0.264671	2	0.783	0.978	0	0
PS114580	Familial candidiasis	monocyte	0.800911	2	0.046	0.245333	0	0
PS114580	Familial candidiasis	myeloid progenitor	0.0716169	2	0.443	0.886	0	0
PS114580	Familial candidiasis	naive b cell	-0.69696	2	0.978	0.978	0	0
PS114580	Familial candidiasis	nampt neutrophil	-0.327323	2	0.567	0.9072	0	0
PS114580	Familial candidiasis	neutrophil	-0.00211094	2	0.429	0.886	0	0
PS114580	Familial candidiasis	nk cell	0.0203688	2	0.556	0.9072	0	0
PS114580	Familial candidiasis	plasma cell	-1.0579	2	0.932	0.978	0	0
PS212065	Congenital disorders of glycosylation, type I	cd4-positive, alpha-beta t cell	0.45263	6	0.014	0.0746667	0	0
PS212065	Congenital disorders of glycosylation, type I	cd8-positive, alpha-beta t cell	0.114096	6	0.21	0.42	0	0
PS212065	Congenital disorders of glycosylation, type I	cd24 neutrophil	-0.998869	6	0.999	0.999	0	0
PS212065	Congenital disorders of glycosylation, type I	erythrocyte	-1.22848	6	0.974	0.999	0	0
PS212065	Congenital disorders of glycosylation, type I	erythroid progenitor	0.0923091	6	0.158	0.361143	0	0
PS212065	Congenital disorders of glycosylation, type I	granulocyte	0.36023	6	0.033	0.132	0	0
PS212065	Congenital disorders of glycosylation, type I	hematopoietic stem cell	0.616127	6	0.009	0.072	0	0
PS212065	Congenital disorders of glycosylation, type I	macrophage	-0.447365	6	0.968	0.999	0	0
PS212065	Congenital disorders of glycosylation, type I	memory b cell	-0.333249	6	0.97	0.999	0	0
PS212065	Congenital disorders of glycosylation, type I	monocyte	0.0654196	6	0.111	0.3552	0	0
PS212065	Congenital disorders of glycosylation, type I	myeloid progenitor	1.24084	6	0.006	0.072	1	0
PS212065	Congenital disorders of glycosylation, type I	naive b cell	-0.388452	6	0.953	0.999	0	0
PS212065	Congenital disorders of glycosylation, type I	nampt neutrophil	-1.11046	6	0.984	0.999	0	0
PS212065	Congenital disorders of glycosylation, type I	neutrophil	-1.02261	6	0.984	0.999	0	0
PS212065	Congenital disorders of glycosylation, type I	nk cell	0.392242	6	0.143	0.361143	0	0
PS212065	Congenital disorders of glycosylation, type I	plasma cell	-0.0729036	6	0.3	0.533333	0	0
PS603041	Mitochondrial DNA depletion syndrome	cd4-positive, alpha-beta t cell	0.159206	3	0.115	0.325333	0	0
PS603041	Mitochondrial DNA depletion syndrome	cd8-positive, alpha-beta t cell	1.03784	3	0.022	0.176	0	0
PS603041	Mitochondrial DNA depletion syndrome	cd24 neutrophil	-0.699946	3	0.906	0.983	0	0
PS603041	Mitochondrial DNA depletion syndrome	erythrocyte	-1.07626	3	0.84	0.983	0	0
PS603041	Mitochondrial DNA depletion syndrome	erythroid progenitor	0.0899721	3	0.149	0.340571	0	0
PS603041	Mitochondrial DNA depletion syndrome	granulocyte	-0.19377	3	0.863	0.983	0	0
PS603041	Mitochondrial DNA depletion syndrome	hematopoietic stem cell	0.458852	3	0.09	0.325333	0	0
PS603041	Mitochondrial DNA depletion syndrome	macrophage	-0.62841	3	0.962	0.983	0	0
PS603041	Mitochondrial DNA depletion syndrome	memory b cell	-0.0305781	3	0.717	0.983	0	0
PS603041	Mitochondrial DNA depletion syndrome	monocyte	-0.223515	3	0.861	0.983	0	0
PS603041	Mitochondrial DNA depletion syndrome	myeloid progenitor	0.443463	3	0.122	0.325333	0	0
PS603041	Mitochondrial DNA depletion syndrome	naive b cell	0.609529	3	0.051	0.272	0	0
PS603041	Mitochondrial DNA depletion syndrome	nampt neutrophil	-1.07626	3	0.922	0.983	0	0
PS603041	Mitochondrial DNA depletion syndrome	neutrophil	-1.03836	3	0.931	0.983	0	0
PS603041	Mitochondrial DNA depletion syndrome	nk cell	1.57442	3	0.022	0.176	0	0
PS603041	Mitochondrial DNA depletion syndrome	plasma cell	-1.33311	3	0.983	0.983	0	0
214500	Chediak-higashi Syndrome	cd4-positive, alpha-beta t cell	-0.728686	1	0.986	0.986	0	0
214500	Chediak-higashi Syndrome	cd8-positive, alpha-beta t cell	-0.446406	1	0.881	0.986	0	0
214500	Chediak-higashi Syndrome	cd24 neutrophil	1.63618	1	0.061	0.325333	0	0
214500	Chediak-higashi Syndrome	erythrocyte	-0.747671	1	0.657	0.986	0	0
214500	Chediak-higashi Syndrome	erythroid progenitor	-0.818409	1	0.951	0.986	0	0
214500	Chediak-higashi Syndrome	granulocyte	0.65062	1	0.123	0.492	0	1
214500	Chediak-higashi Syndrome	hematopoietic stem cell	-0.803921	1	0.982	0.986	0	0
214500	Chediak-higashi Syndrome	macrophage	-0.295344	1	0.702	0.986	0	0
214500	Chediak-higashi Syndrome	memory b cell	-0.392568	1	0.809	0.986	0	0
214500	Chediak-higashi Syndrome	monocyte	0.0913847	1	0.205	0.656	0	0
214500	Chediak-higashi Syndrome	myeloid progenitor	-0.792341	1	0.968	0.986	0	0
214500	Chediak-higashi Syndrome	naive b cell	-0.0188291	1	0.668	0.986	0	0
214500	Chediak-higashi Syndrome	nampt neutrophil	1.62313	1	0.059	0.325333	0	0
214500	Chediak-higashi Syndrome	neutrophil	2.22146	1	0.045	0.325333	0	1
214500	Chediak-higashi Syndrome	nk cell	-0.313252	1	0.889	0.986	0	0
214500	Chediak-higashi Syndrome	plasma cell	-0.86535	1	0.787	0.986	0	0
214800	Charge Syndrome	cd4-positive, alpha-beta t cell	-0.146092	2	0.681	0.997	0	0
214800	Charge Syndrome	cd8-positive, alpha-beta t cell	-0.622774	2	0.997	0.997	0	0
214800	Charge Syndrome	cd24 neutrophil	1.81958	2	0.008	0.0426667	1	0
214800	Charge Syndrome	erythrocyte	-0.0984455	2	0.281	0.8992	0	0
214800	Charge Syndrome	erythroid progenitor	-0.697054	2	0.979	0.997	0	0
214800	Charge Syndrome	granulocyte	-0.483618	2	0.966	0.997	0	0
214800	Charge Syndrome	hematopoietic stem cell	-0.723217	2	0.996	0.997	0	0
214800	Charge Syndrome	macrophage	-0.865167	2	0.992	0.997	0	0
214800	Charge Syndrome	memory b cell	0.312926	2	0.172	0.688	0	0
214800	Charge Syndrome	monocyte	-0.514952	2	0.995	0.997	0	0
214800	Charge Syndrome	myeloid progenitor	-0.464164	2	0.946	0.997	0	0
214800	Charge Syndrome	naive b cell	-0.232433	2	0.708	0.997	0	0
214800	Charge Syndrome	nampt neutrophil	1.72463	2	0.008	0.0426667	1	0
214800	Charge Syndrome	neutrophil	1.79517	2	0.006	0.0426667	1	0
214800	Charge Syndrome	nk cell	-0.0932631	2	0.771	0.997	0	0
214800	Charge Syndrome	plasma cell	-0.711125	2	0.763	0.997	0	0
PS607765	Bile acid synthesis defect, congenital	cd4-positive, alpha-beta t cell	-0.265001	2	0.827	0.961	0	0
PS607765	Bile acid synthesis defect, congenital	cd8-positive, alpha-beta t cell	-0.00181346	2	0.681	0.961	0	0
PS607765	Bile acid synthesis defect, congenital	cd24 neutrophil	0.214469	2	0.226	0.7232	0	0
PS607765	Bile acid synthesis defect, congenital	erythrocyte	-0.78846	2	0.737	0.961	0	0
PS607765	Bile acid synthesis defect, congenital	erythroid progenitor	0.788561	2	0.126	0.504	0	0
PS607765	Bile acid synthesis defect, congenital	granulocyte	0.870936	2	0.067	0.357333	0	0
PS607765	Bile acid synthesis defect, congenital	hematopoietic stem cell	0.196075	2	0.309	0.779429	0	0
PS607765	Bile acid synthesis defect, congenital	macrophage	-0.293978	2	0.78	0.961	0	0
PS607765	Bile acid synthesis defect, congenital	memory b cell	-0.37066	2	0.901	0.961	0	0
PS607765	Bile acid synthesis defect, congenital	monocyte	0.847001	2	0.034	0.272	0	0
PS607765	Bile acid synthesis defect, congenital	myeloid progenitor	1.81175	2	0.011	0.176	0	0
PS607765	Bile acid synthesis defect, congenital	naive b cell	0.00563458	2	0.341	0.779429	0	0
PS607765	Bile acid synthesis defect, congenital	nampt neutrophil	-1.08346	2	0.934	0.961	0	0
PS607765	Bile acid synthesis defect, congenital	neutrophil	-1.16535	2	0.961	0.961	0	0
PS607765	Bile acid synthesis defect, congenital	nk cell	0.264556	2	0.424	0.848	0	0
PS607765	Bile acid synthesis defect, congenital	plasma cell	-1.03025	2	0.911	0.961	0	0
216340	Cleidocranial Dysplasia With Micrognathia, Absent Thumbs, And Distal	cd4-positive, alpha-beta t cell	-0.589966	1	0.942	0.963	0	0
216340	Cleidocranial Dysplasia With Micrognathia, Absent Thumbs, And Distal	cd8-positive, alpha-beta t cell	-0.0983524	1	0.772	0.963	0	0
216340	Cleidocranial Dysplasia With Micrognathia, Absent Thumbs, And Distal	cd24 neutrophil	2.50691	1	0.022	0.352	0	0
216340	Cleidocranial Dysplasia With Micrognathia, Absent Thumbs, And Distal	erythrocyte	-1.46439	1	0.899	0.963	0	0
216340	Cleidocranial Dysplasia With Micrognathia, Absent Thumbs, And Distal	erythroid progenitor	-0.813903	1	0.945	0.963	0	0
216340	Cleidocranial Dysplasia With Micrognathia, Absent Thumbs, And Distal	granulocyte	0.381548	1	0.189	0.504	0	0
216340	Cleidocranial Dysplasia With Micrognathia, Absent Thumbs, And Distal	hematopoietic stem cell	-0.511556	1	0.903	0.963	0	0
216340	Cleidocranial Dysplasia With Micrognathia, Absent Thumbs, And Distal	macrophage	0.782745	1	0.094	0.501333	0	0
216340	Cleidocranial Dysplasia With Micrognathia, Absent Thumbs, And Distal	memory b cell	-0.0261774	1	0.656	0.963	0	0
216340	Cleidocranial Dysplasia With Micrognathia, Absent Thumbs, And Distal	monocyte	0.346863	1	0.152	0.504	0	0
216340	Cleidocranial Dysplasia With Micrognathia, Absent Thumbs, And Distal	myeloid progenitor	-0.790698	1	0.963	0.963	0	0
216340	Cleidocranial Dysplasia With Micrognathia, Absent Thumbs, And Distal	naive b cell	1.0759	1	0.08	0.501333	0	0
216340	Cleidocranial Dysplasia With Micrognathia, Absent Thumbs, And Distal	nampt neutrophil	-0.0318719	1	0.575	0.963	0	0
216340	Cleidocranial Dysplasia With Micrognathia, Absent Thumbs, And Distal	neutrophil	-0.543503	1	0.669	0.963	0	0
216340	Cleidocranial Dysplasia With Micrognathia, Absent Thumbs, And Distal	nk cell	0.961936	1	0.184	0.504	0	0
216340	Cleidocranial Dysplasia With Micrognathia, Absent Thumbs, And Distal	plasma cell	-1.18548	1	0.899	0.963	0	0
216550	Cohen Syndrome	cd4-positive, alpha-beta t cell	-0.411526	1	0.837	0.982	0	0
216550	Cohen Syndrome	cd8-positive, alpha-beta t cell	0.0900129	1	0.302	0.877333	0	0
216550	Cohen Syndrome	cd24 neutrophil	1.83656	1	0.035	0.28	0	0
216550	Cohen Syndrome	erythrocyte	2.02875	1	0.021	0.28	0	0
216550	Cohen Syndrome	erythroid progenitor	-0.773673	1	0.941	0.982	0	0
216550	Cohen Syndrome	granulocyte	-0.797404	1	0.982	0.982	0	0
216550	Cohen Syndrome	hematopoietic stem cell	-0.625079	1	0.956	0.982	0	0
216550	Cohen Syndrome	macrophage	-0.929179	1	0.954	0.982	0	0
216550	Cohen Syndrome	memory b cell	-0.437529	1	0.844	0.982	0	0
216550	Cohen Syndrome	monocyte	-0.186875	1	0.756	0.982	0	0
216550	Cohen Syndrome	myeloid progenitor	-0.552696	1	0.892	0.982	0	0
216550	Cohen Syndrome	naive b cell	-0.192972	1	0.677	0.982	0	0
216550	Cohen Syndrome	nampt neutrophil	1.03141	1	0.105	0.424	0	0
216550	Cohen Syndrome	neutrophil	1.13712	1	0.106	0.424	0	0
216550	Cohen Syndrome	nk cell	0.159305	1	0.329	0.877333	0	0
216550	Cohen Syndrome	plasma cell	-1.37622	1	0.936	0.982	0	0
PS222470	Trichohepatoenteric syndrome	cd4-positive, alpha-beta t cell	0.136246	1	0.222	0.401778	0	0
PS222470	Trichohepatoenteric syndrome	cd8-positive, alpha-beta t cell	0.144381	1	0.299	0.434909	0	0
PS222470	Trichohepatoenteric syndrome	cd24 neutrophil	0.040209	1	0.18	0.401778	0	0
PS222470	Trichohepatoenteric syndrome	erythrocyte	-1.51752	1	0.921	0.9824	0	0
PS222470	Trichohepatoenteric syndrome	erythroid progenitor	0.202525	1	0.226	0.401778	0	0
PS222470	Trichohepatoenteric syndrome	granulocyte	0.824615	1	0.093	0.401778	0	0
PS222470	Trichohepatoenteric syndrome	hematopoietic stem cell	0.320307	1	0.193	0.401778	0	0
PS222470	Trichohepatoenteric syndrome	macrophage	-0.646879	1	0.905	0.9824	0	0
PS222470	Trichohepatoenteric syndrome	memory b cell	0.326199	1	0.143	0.401778	0	0
PS222470	Trichohepatoenteric syndrome	monocyte	0.543223	1	0.114	0.401778	0	0
PS222470	Trichohepatoenteric syndrome	myeloid progenitor	2.25719	1	0.021	0.336	0	0
PS222470	Trichohepatoenteric syndrome	naive b cell	0.677941	1	0.125	0.401778	0	0
PS222470	Trichohepatoenteric syndrome	nampt neutrophil	-1.66249	1	0.989	0.989	0	0
PS222470	Trichohepatoenteric syndrome	neutrophil	-1.30601	1	0.909	0.9824	0	0
PS222470	Trichohepatoenteric syndrome	nk cell	0.512209	1	0.257	0.4112	0	0
PS222470	Trichohepatoenteric syndrome	plasma cell	-0.852143	1	0.75	0.9824	0	0
222700	Lysinuric Protein Intolerance	cd4-positive, alpha-beta t cell	-0.468823	1	0.862	0.922	0	0
222700	Lysinuric Protein Intolerance	cd8-positive, alpha-beta t cell	-0.463629	1	0.898	0.922	0	0
222700	Lysinuric Protein Intolerance	cd24 neutrophil	-0.381064	1	0.704	0.922	0	0
222700	Lysinuric Protein Intolerance	erythrocyte	-0.443427	1	0.538	0.922	0	0
222700	Lysinuric Protein Intolerance	erythroid progenitor	-0.471777	1	0.818	0.922	0	0
222700	Lysinuric Protein Intolerance	granulocyte	-0.210643	1	0.765	0.922	0	0
222700	Lysinuric Protein Intolerance	hematopoietic stem cell	-0.424522	1	0.862	0.922	0	0
222700	Lysinuric Protein Intolerance	macrophage	2.92608	1	0.002	0.032	1	0
222700	Lysinuric Protein Intolerance	memory b cell	-0.25718	1	0.742	0.922	0	0
222700	Lysinuric Protein Intolerance	monocyte	2.09337	1	0.006	0.048	1	0
222700	Lysinuric Protein Intolerance	myeloid progenitor	-0.470098	1	0.873	0.922	0	0
222700	Lysinuric Protein Intolerance	naive b cell	-0.302671	1	0.707	0.922	0	0
222700	Lysinuric Protein Intolerance	nampt neutrophil	-0.177009	1	0.611	0.922	0	0
222700	Lysinuric Protein Intolerance	neutrophil	-0.454222	1	0.677	0.922	0	0
222700	Lysinuric Protein Intolerance	nk cell	-0.463457	1	0.922	0.922	0	0
222700	Lysinuric Protein Intolerance	plasma cell	-0.0309232	1	0.464	0.922	0	0
222800	Diphosphoglycerate Mutase Deficiency Of Erythrocyte	cd4-positive, alpha-beta t cell	-0.274107	1	0.79	0.819	0	0
222800	Diphosphoglycerate Mutase Deficiency Of Erythrocyte	cd8-positive, alpha-beta t cell	-0.253535	1	0.819	0.819	0	0
222800	Diphosphoglycerate Mutase Deficiency Of Erythrocyte	cd24 neutrophil	-0.240763	1	0.649	0.819	0	0
222800	Diphosphoglycerate Mutase Deficiency Of Erythrocyte	erythrocyte	3.74661	1	0.003	0.048	1	0	1
222800	Diphosphoglycerate Mutase Deficiency Of Erythrocyte	erythroid progenitor	-0.127647	1	0.687	0.819	0	0
222800	Diphosphoglycerate Mutase Deficiency Of Erythrocyte	granulocyte	-0.279249	1	0.801	0.819	0	0
222800	Diphosphoglycerate Mutase Deficiency Of Erythrocyte	hematopoietic stem cell	-0.259936	1	0.786	0.819	0	0
222800	Diphosphoglycerate Mutase Deficiency Of Erythrocyte	macrophage	-0.27263	1	0.703	0.819	0	0
222800	Diphosphoglycerate Mutase Deficiency Of Erythrocyte	memory b cell	-0.251535	1	0.735	0.819	0	0
222800	Diphosphoglycerate Mutase Deficiency Of Erythrocyte	monocyte	-0.284099	1	0.815	0.819	0	0
222800	Diphosphoglycerate Mutase Deficiency Of Erythrocyte	myeloid progenitor	-0.259044	1	0.793	0.819	0	0
222800	Diphosphoglycerate Mutase Deficiency Of Erythrocyte	naive b cell	-0.253338	1	0.708	0.819	0	0
222800	Diphosphoglycerate Mutase Deficiency Of Erythrocyte	nampt neutrophil	-0.281247	1	0.596	0.819	0	0
222800	Diphosphoglycerate Mutase Deficiency Of Erythrocyte	neutrophil	-0.188696	1	0.598	0.819	0	0
222800	Diphosphoglycerate Mutase Deficiency Of Erythrocyte	nk cell	-0.216979	1	0.8	0.819	0	0
222800	Diphosphoglycerate Mutase Deficiency Of Erythrocyte	plasma cell	-0.303808	1	0.479	0.819	0	0
PS224120	Anemia, congenital dyserythropoietic	cd4-positive, alpha-beta t cell	-0.323646	2	0.9	0.988	0	0
PS224120	Anemia, congenital dyserythropoietic	cd8-positive, alpha-beta t cell	-0.232394	2	0.867	0.988	0	0
PS224120	Anemia, congenital dyserythropoietic	cd24 neutrophil	0.825826	2	0.101	0.404	0	0
PS224120	Anemia, congenital dyserythropoietic	erythrocyte	0.231676	2	0.079	0.404	0	1
PS224120	Anemia, congenital dyserythropoietic	erythroid progenitor	0.963988	2	0.089	0.404	0	0
PS224120	Anemia, congenital dyserythropoietic	granulocyte	0.722013	2	0.074	0.404	0	0
PS224120	Anemia, congenital dyserythropoietic	hematopoietic stem cell	-0.23421	2	0.816	0.988	0	0
PS224120	Anemia, congenital dyserythropoietic	macrophage	-0.330195	2	0.78	0.988	0	0
PS224120	Anemia, congenital dyserythropoietic	memory b cell	-0.489484	2	0.95	0.988	0	0
PS224120	Anemia, congenital dyserythropoietic	monocyte	0.183893	2	0.223	0.704	0	0
PS224120	Anemia, congenital dyserythropoietic	myeloid progenitor	0.241144	2	0.36	0.822857	0	0
PS224120	Anemia, congenital dyserythropoietic	naive b cell	-0.841967	2	0.988	0.988	0	0
PS224120	Anemia, congenital dyserythropoietic	nampt neutrophil	-0.231738	2	0.545	0.988	0	0
PS224120	Anemia, congenital dyserythropoietic	neutrophil	-0.307308	2	0.581	0.988	0	0
PS224120	Anemia, congenital dyserythropoietic	nk cell	-0.139329	2	0.81	0.988	0	0
PS224120	Anemia, congenital dyserythropoietic	plasma cell	-0.0382695	2	0.264	0.704	0	0
PS225750	Aicardi-Goutieres syndrome	cd4-positive, alpha-beta t cell	-0.18028	6	0.894	0.989	0	0
PS225750	Aicardi-Goutieres syndrome	cd8-positive, alpha-beta t cell	0.0290036	6	0.297	0.9504	0	0
PS225750	Aicardi-Goutieres syndrome	cd24 neutrophil	-0.791165	6	0.989	0.989	0	0
PS225750	Aicardi-Goutieres syndrome	erythrocyte	-0.939874	6	0.897	0.989	0	0
PS225750	Aicardi-Goutieres syndrome	erythroid progenitor	0.438142	6	0.036	0.192	0	0
PS225750	Aicardi-Goutieres syndrome	granulocyte	0.964946	6	0.002	0.032	0	0
PS225750	Aicardi-Goutieres syndrome	hematopoietic stem cell	0.441799	6	0.026	0.192	0	0
PS225750	Aicardi-Goutieres syndrome	macrophage	-0.00855127	6	0.61	0.989	0	0
PS225750	Aicardi-Goutieres syndrome	memory b cell	-0.125998	6	0.776	0.989	0	0
PS225750	Aicardi-Goutieres syndrome	monocyte	-0.0610088	6	0.778	0.989	0	0
PS225750	Aicardi-Goutieres syndrome	myeloid progenitor	-0.202558	6	0.939	0.989	0	0
PS225750	Aicardi-Goutieres syndrome	naive b cell	0.141544	6	0.078	0.312	0	0
PS225750	Aicardi-Goutieres syndrome	nampt neutrophil	-0.747406	6	0.921	0.989	0	0
PS225750	Aicardi-Goutieres syndrome	neutrophil	-1.08308	6	0.98	0.989	0	0
PS225750	Aicardi-Goutieres syndrome	nk cell	-0.0576299	6	0.918	0.989	0	0
PS225750	Aicardi-Goutieres syndrome	plasma cell	-0.602435	6	0.765	0.989	0	0
226300	Complement Hyperactivation, Angiopathic Thrombosis, And Protein-losing Enteropathy	cd4-positive, alpha-beta t cell	-0.460796	1	0.862	0.951	0	0
226300	Complement Hyperactivation, Angiopathic Thrombosis, And Protein-losing Enteropathy	cd8-positive, alpha-beta t cell	-0.562588	1	0.951	0.951	0	0
226300	Complement Hyperactivation, Angiopathic Thrombosis, And Protein-losing Enteropathy	cd24 neutrophil	1.05593	1	0.115	0.613333	0	0
226300	Complement Hyperactivation, Angiopathic Thrombosis, And Protein-losing Enteropathy	erythrocyte	-0.300951	1	0.507	0.951	0	0
226300	Complement Hyperactivation, Angiopathic Thrombosis, And Protein-losing Enteropathy	erythroid progenitor	-0.630369	1	0.873	0.951	0	0
226300	Complement Hyperactivation, Angiopathic Thrombosis, And Protein-losing Enteropathy	granulocyte	-0.470061	1	0.919	0.951	0	0
226300	Complement Hyperactivation, Angiopathic Thrombosis, And Protein-losing Enteropathy	hematopoietic stem cell	-0.59226	1	0.924	0.951	0	0
226300	Complement Hyperactivation, Angiopathic Thrombosis, And Protein-losing Enteropathy	macrophage	-0.309007	1	0.719	0.951	0	0
226300	Complement Hyperactivation, Angiopathic Thrombosis, And Protein-losing Enteropathy	memory b cell	-0.422627	1	0.829	0.951	0	0
226300	Complement Hyperactivation, Angiopathic Thrombosis, And Protein-losing Enteropathy	monocyte	-0.114522	1	0.697	0.951	0	0
226300	Complement Hyperactivation, Angiopathic Thrombosis, And Protein-losing Enteropathy	myeloid progenitor	-0.568726	1	0.906	0.951	0	0
226300	Complement Hyperactivation, Angiopathic Thrombosis, And Protein-losing Enteropathy	naive b cell	-0.283479	1	0.729	0.951	0	0
226300	Complement Hyperactivation, Angiopathic Thrombosis, And Protein-losing Enteropathy	nampt neutrophil	2.52887	1	0.02	0.248	0	0
226300	Complement Hyperactivation, Angiopathic Thrombosis, And Protein-losing Enteropathy	neutrophil	2.15245	1	0.031	0.248	0	0
226300	Complement Hyperactivation, Angiopathic Thrombosis, And Protein-losing Enteropathy	nk cell	-0.344853	1	0.878	0.951	0	0
226300	Complement Hyperactivation, Angiopathic Thrombosis, And Protein-losing Enteropathy	plasma cell	-0.67701	1	0.676	0.951	0	0
226670	Epidermolysis Bullosa Simplex With Muscular Dystrophy	cd4-positive, alpha-beta t cell	-0.526922	1	0.922	0.988	0	0
226670	Epidermolysis Bullosa Simplex With Muscular Dystrophy	cd8-positive, alpha-beta t cell	-0.424912	1	0.897	0.988	0	0
226670	Epidermolysis Bullosa Simplex With Muscular Dystrophy	cd24 neutrophil	1.58242	1	0.06	0.3136	0	0
226670	Epidermolysis Bullosa Simplex With Muscular Dystrophy	erythrocyte	-1.04239	1	0.728	0.988	0	0
226670	Epidermolysis Bullosa Simplex With Muscular Dystrophy	erythroid progenitor	-0.989891	1	0.969	0.988	0	0
226670	Epidermolysis Bullosa Simplex With Muscular Dystrophy	granulocyte	0.788798	1	0.098	0.3136	0	0
226670	Epidermolysis Bullosa Simplex With Muscular Dystrophy	hematopoietic stem cell	-0.803275	1	0.984	0.988	0	0
226670	Epidermolysis Bullosa Simplex With Muscular Dystrophy	macrophage	1.68727	1	0.037	0.3136	0	0
226670	Epidermolysis Bullosa Simplex With Muscular Dystrophy	memory b cell	-0.625689	1	0.925	0.988	0	0
226670	Epidermolysis Bullosa Simplex With Muscular Dystrophy	monocyte	1.21254	1	0.042	0.3136	0	0
226670	Epidermolysis Bullosa Simplex With Muscular Dystrophy	myeloid progenitor	-0.960204	1	0.988	0.988	0	0
226670	Epidermolysis Bullosa Simplex With Muscular Dystrophy	naive b cell	-0.501583	1	0.811	0.988	0	0
226670	Epidermolysis Bullosa Simplex With Muscular Dystrophy	nampt neutrophil	0.531354	1	0.157	0.418667	0	0
226670	Epidermolysis Bullosa Simplex With Muscular Dystrophy	neutrophil	1.29918	1	0.092	0.3136	0	0
226670	Epidermolysis Bullosa Simplex With Muscular Dystrophy	nk cell	-0.390806	1	0.907	0.988	0	0
226670	Epidermolysis Bullosa Simplex With Muscular Dystrophy	plasma cell	-0.835892	1	0.745	0.988	0	0
PS227650	Fanconi anemia	cd4-positive, alpha-beta t cell	-0.473637	14	0.999	1	0	0
PS227650	Fanconi anemia	cd8-positive, alpha-beta t cell	-0.267297	14	0.999	1	0	0
PS227650	Fanconi anemia	cd24 neutrophil	-0.4957	14	0.982	1	0	0
PS227650	Fanconi anemia	erythrocyte	-0.656118	14	0.803	1	0	0
PS227650	Fanconi anemia	erythroid progenitor	1.51952	14	0	0	1	1
PS227650	Fanconi anemia	granulocyte	1.52816	14	0	0	1	0
PS227650	Fanconi anemia	hematopoietic stem cell	-0.0304449	14	0.938	1	0	1
PS227650	Fanconi anemia	macrophage	-0.694035	14	1	1	0	0
PS227650	Fanconi anemia	memory b cell	-0.207146	14	0.964	1	0	0
PS227650	Fanconi anemia	monocyte	-0.257029	14	0.992	1	0	0
PS227650	Fanconi anemia	myeloid progenitor	1.56363	14	0	0	1	0
PS227650	Fanconi anemia	naive b cell	-0.446993	14	0.993	1	0	0
PS227650	Fanconi anemia	nampt neutrophil	-0.949935	14	0.996	1	0	0
PS227650	Fanconi anemia	neutrophil	-0.707325	14	0.982	1	0	0
PS227650	Fanconi anemia	nk cell	0.264816	14	0.081	0.324	0	0
PS227650	Fanconi anemia	plasma cell	-0.573627	14	0.831	1	0	0
228000	Farber Lipogranulomatosis	cd4-positive, alpha-beta t cell	-0.942284	1	0.997	0.997	0	0
228000	Farber Lipogranulomatosis	cd8-positive, alpha-beta t cell	-0.872174	1	0.993	0.997	0	0
228000	Farber Lipogranulomatosis	cd24 neutrophil	1.56886	1	0.068	0.2208	0	0
228000	Farber Lipogranulomatosis	erythrocyte	0.376491	1	0.049	0.2208	0	0
228000	Farber Lipogranulomatosis	erythroid progenitor	-0.754886	1	0.923	0.997	0	0
228000	Farber Lipogranulomatosis	granulocyte	-0.484978	1	0.91	0.997	0	0
228000	Farber Lipogranulomatosis	hematopoietic stem cell	-0.507122	1	0.904	0.997	0	0
228000	Farber Lipogranulomatosis	macrophage	0.583531	1	0.112	0.298667	0	0
228000	Farber Lipogranulomatosis	memory b cell	-0.600665	1	0.928	0.997	0	0
228000	Farber Lipogranulomatosis	monocyte	0.837128	1	0.069	0.2208	0	0
228000	Farber Lipogranulomatosis	myeloid progenitor	-0.555999	1	0.913	0.997	0	0
228000	Farber Lipogranulomatosis	naive b cell	-0.592116	1	0.864	0.997	0	0
228000	Farber Lipogranulomatosis	nampt neutrophil	1.85676	1	0.038	0.2208	0	0
228000	Farber Lipogranulomatosis	neutrophil	1.6864	1	0.062	0.2208	0	0
228000	Farber Lipogranulomatosis	nk cell	-0.634513	1	0.971	0.997	0	0
228000	Farber Lipogranulomatosis	plasma cell	-0.964443	1	0.809	0.997	0	0
230000	Fucosidosis	cd4-positive, alpha-beta t cell	-0.246638	1	0.754	0.958933	0	0
230000	Fucosidosis	cd8-positive, alpha-beta t cell	0.0954591	1	0.36	0.822857	0	0
230000	Fucosidosis	cd24 neutrophil	-0.890423	1	0.852	0.958933	0	0
230000	Fucosidosis	erythrocyte	-0.121765	1	0.467	0.934	0	0
230000	Fucosidosis	erythroid progenitor	-0.132321	1	0.711	0.958933	0	0
230000	Fucosidosis	granulocyte	-0.0976355	1	0.7	0.958933	0	0
230000	Fucosidosis	hematopoietic stem cell	0.504865	1	0.151	0.604	0	0
230000	Fucosidosis	macrophage	2.06479	1	0.014	0.112	0	0
230000	Fucosidosis	memory b cell	-0.250041	1	0.729	0.958933	0	0
230000	Fucosidosis	monocyte	2.1451	1	0.008	0.112	0	0
230000	Fucosidosis	myeloid progenitor	0.254904	1	0.263	0.744	0	0
230000	Fucosidosis	naive b cell	-1.25566	1	0.993	0.993	0	0
230000	Fucosidosis	nampt neutrophil	-1.25566	1	0.899	0.958933	0	0
230000	Fucosidosis	neutrophil	-1.25566	1	0.88	0.958933	0	0
230000	Fucosidosis	nk cell	0.322697	1	0.279	0.744	0	0
230000	Fucosidosis	plasma cell	0.117994	1	0.047	0.250667	0	0
PS230400	Galactosemia	cd4-positive, alpha-beta t cell	1.6238	1	0.026	0.328	0	0
PS230400	Galactosemia	cd8-positive, alpha-beta t cell	1.05615	1	0.108	0.432	0	0
PS230400	Galactosemia	cd24 neutrophil	-0.874546	1	0.861	0.925	0	0
PS230400	Galactosemia	erythrocyte	-1.23085	1	0.835	0.925	0	0
PS230400	Galactosemia	erythroid progenitor	-0.125416	1	0.706	0.925	0	0
PS230400	Galactosemia	granulocyte	-0.42971	1	0.881	0.925	0	0
PS230400	Galactosemia	hematopoietic stem cell	0.525234	1	0.151	0.470857	0	0
PS230400	Galactosemia	macrophage	0.0149274	1	0.206	0.470857	0	0
PS230400	Galactosemia	memory b cell	0.234568	1	0.18	0.470857	0	0
PS230400	Galactosemia	monocyte	-0.202197	1	0.74	0.925	0	0
PS230400	Galactosemia	myeloid progenitor	-0.250612	1	0.787	0.925	0	0
PS230400	Galactosemia	naive b cell	0.748019	1	0.108	0.432	0	0
PS230400	Galactosemia	nampt neutrophil	-1.13994	1	0.829	0.925	0	0
PS230400	Galactosemia	neutrophil	-1.35407	1	0.925	0.925	0	0
PS230400	Galactosemia	nk cell	2.05395	1	0.041	0.328	0	0
PS230400	Galactosemia	plasma cell	-0.649308	1	0.658	0.925	0	0
230450	Gamma-glutamylcysteine Synthetase Deficiency, Hemolytic Anemia Dueto	cd4-positive, alpha-beta t cell	-0.375292	1	0.826	0.842	0	0
230450	Gamma-glutamylcysteine Synthetase Deficiency, Hemolytic Anemia Dueto	cd8-positive, alpha-beta t cell	-0.285178	1	0.842	0.842	0	0
230450	Gamma-glutamylcysteine Synthetase Deficiency, Hemolytic Anemia Dueto	cd24 neutrophil	-0.455604	1	0.731	0.842	0	0
230450	Gamma-glutamylcysteine Synthetase Deficiency, Hemolytic Anemia Dueto	erythrocyte	3.67502	1	0.009	0.144	0	0
230450	Gamma-glutamylcysteine Synthetase Deficiency, Hemolytic Anemia Dueto	erythroid progenitor	0.0599452	1	0.252	0.842	0	0
230450	Gamma-glutamylcysteine Synthetase Deficiency, Hemolytic Anemia Dueto	granulocyte	0.133488	1	0.227	0.842	0	0
230450	Gamma-glutamylcysteine Synthetase Deficiency, Hemolytic Anemia Dueto	hematopoietic stem cell	-0.287068	1	0.798	0.842	0	0
230450	Gamma-glutamylcysteine Synthetase Deficiency, Hemolytic Anemia Dueto	macrophage	-0.0720905	1	0.637	0.842	0	0
230450	Gamma-glutamylcysteine Synthetase Deficiency, Hemolytic Anemia Dueto	memory b cell	-0.211676	1	0.705	0.842	0	0
230450	Gamma-glutamylcysteine Synthetase Deficiency, Hemolytic Anemia Dueto	monocyte	-0.0310487	1	0.641	0.842	0	0
230450	Gamma-glutamylcysteine Synthetase Deficiency, Hemolytic Anemia Dueto	myeloid progenitor	-0.136306	1	0.745	0.842	0	0
230450	Gamma-glutamylcysteine Synthetase Deficiency, Hemolytic Anemia Dueto	naive b cell	-0.481434	1	0.841	0.842	0	0
230450	Gamma-glutamylcysteine Synthetase Deficiency, Hemolytic Anemia Dueto	nampt neutrophil	-0.520599	1	0.675	0.842	0	0
230450	Gamma-glutamylcysteine Synthetase Deficiency, Hemolytic Anemia Dueto	neutrophil	-0.294906	1	0.631	0.842	0	0
230450	Gamma-glutamylcysteine Synthetase Deficiency, Hemolytic Anemia Dueto	nk cell	-0.210122	1	0.822	0.842	0	0
230450	Gamma-glutamylcysteine Synthetase Deficiency, Hemolytic Anemia Dueto	plasma cell	-0.50713	1	0.565	0.842	0	0
230500	Gm1-gangliosidosis, Type I	cd4-positive, alpha-beta t cell	-0.427862	1	0.844	0.900267	0	0
230500	Gm1-gangliosidosis, Type I	cd8-positive, alpha-beta t cell	0.195961	1	0.265	0.706667	0	0
230500	Gm1-gangliosidosis, Type I	cd24 neutrophil	-0.618089	1	0.769	0.900267	0	0
230500	Gm1-gangliosidosis, Type I	erythrocyte	-1.08357	1	0.752	0.900267	0	0
230500	Gm1-gangliosidosis, Type I	erythroid progenitor	0.432656	1	0.182	0.5824	0	0
230500	Gm1-gangliosidosis, Type I	granulocyte	1.64315	1	0.024	0.192	0	0
230500	Gm1-gangliosidosis, Type I	hematopoietic stem cell	0.453389	1	0.178	0.5824	0	0
230500	Gm1-gangliosidosis, Type I	macrophage	1.40501	1	0.044	0.234667	0	0
230500	Gm1-gangliosidosis, Type I	memory b cell	-0.437227	1	0.834	0.900267	0	0
230500	Gm1-gangliosidosis, Type I	monocyte	2.15242	1	0.006	0.096	1	0
230500	Gm1-gangliosidosis, Type I	myeloid progenitor	-0.220571	1	0.776	0.900267	0	0
230500	Gm1-gangliosidosis, Type I	naive b cell	-1.14542	1	0.991	0.991	0	0
230500	Gm1-gangliosidosis, Type I	nampt neutrophil	-1.06014	1	0.822	0.900267	0	0
230500	Gm1-gangliosidosis, Type I	neutrophil	-0.603793	1	0.718	0.900267	0	0
230500	Gm1-gangliosidosis, Type I	nk cell	0.0086105	1	0.379	0.866286	0	0
230500	Gm1-gangliosidosis, Type I	plasma cell	-0.694535	1	0.646	0.900267	0	0
230600	Gm1-gangliosidosis, Type Ii	cd4-positive, alpha-beta t cell	-0.427862	1	0.844	0.900267	0	0
230600	Gm1-gangliosidosis, Type Ii	cd8-positive, alpha-beta t cell	0.195961	1	0.269	0.717333	0	0
230600	Gm1-gangliosidosis, Type Ii	cd24 neutrophil	-0.618089	1	0.781	0.900267	0	0
230600	Gm1-gangliosidosis, Type Ii	erythrocyte	-1.08357	1	0.768	0.900267	0	0
230600	Gm1-gangliosidosis, Type Ii	erythroid progenitor	0.432656	1	0.204	0.6528	0	0
230600	Gm1-gangliosidosis, Type Ii	granulocyte	1.64315	1	0.032	0.256	0	0
230600	Gm1-gangliosidosis, Type Ii	hematopoietic stem cell	0.453389	1	0.179	0.6528	0	0
230600	Gm1-gangliosidosis, Type Ii	macrophage	1.40501	1	0.048	0.256	0	0
230600	Gm1-gangliosidosis, Type Ii	memory b cell	-0.437227	1	0.828	0.900267	0	0
230600	Gm1-gangliosidosis, Type Ii	monocyte	2.15242	1	0.009	0.144	0	0
230600	Gm1-gangliosidosis, Type Ii	myeloid progenitor	-0.220571	1	0.77	0.900267	0	0
230600	Gm1-gangliosidosis, Type Ii	naive b cell	-1.14542	1	0.985	0.985	0	0
230600	Gm1-gangliosidosis, Type Ii	nampt neutrophil	-1.06014	1	0.814	0.900267	0	0
230600	Gm1-gangliosidosis, Type Ii	neutrophil	-0.603793	1	0.714	0.900267	0	0
230600	Gm1-gangliosidosis, Type Ii	nk cell	0.0086105	1	0.367	0.838857	0	0
230600	Gm1-gangliosidosis, Type Ii	plasma cell	-0.694535	1	0.692	0.900267	0	0
230650	Gm1-gangliosidosis, Type Iii	cd4-positive, alpha-beta t cell	-0.427862	1	0.846	0.9024	0	0
230650	Gm1-gangliosidosis, Type Iii	cd8-positive, alpha-beta t cell	0.195961	1	0.289	0.770667	0	0
230650	Gm1-gangliosidosis, Type Iii	cd24 neutrophil	-0.618089	1	0.807	0.9024	0	0
230650	Gm1-gangliosidosis, Type Iii	erythrocyte	-1.08357	1	0.771	0.9024	0	0
230650	Gm1-gangliosidosis, Type Iii	erythroid progenitor	0.432656	1	0.18	0.576	0	0
230650	Gm1-gangliosidosis, Type Iii	granulocyte	1.64315	1	0.031	0.197333	0	0
230650	Gm1-gangliosidosis, Type Iii	hematopoietic stem cell	0.453389	1	0.179	0.576	0	0
230650	Gm1-gangliosidosis, Type Iii	macrophage	1.40501	1	0.037	0.197333	0	0
230650	Gm1-gangliosidosis, Type Iii	memory b cell	-0.437227	1	0.834	0.9024	0	0
230650	Gm1-gangliosidosis, Type Iii	monocyte	2.15242	1	0.007	0.112	0	0
230650	Gm1-gangliosidosis, Type Iii	myeloid progenitor	-0.220571	1	0.787	0.9024	0	0
230650	Gm1-gangliosidosis, Type Iii	naive b cell	-1.14542	1	0.992	0.992	0	0
230650	Gm1-gangliosidosis, Type Iii	nampt neutrophil	-1.06014	1	0.811	0.9024	0	0
230650	Gm1-gangliosidosis, Type Iii	neutrophil	-0.603793	1	0.697	0.9024	0	0
230650	Gm1-gangliosidosis, Type Iii	nk cell	0.0086105	1	0.368	0.841143	0	0
230650	Gm1-gangliosidosis, Type Iii	plasma cell	-0.694535	1	0.685	0.9024	0	0
230800	Gaucher Disease, Type I	cd4-positive, alpha-beta t cell	0.0275743	1	0.272	0.621714	0	0
230800	Gaucher Disease, Type I	cd8-positive, alpha-beta t cell	0.930079	1	0.135	0.48	0	0
230800	Gaucher Disease, Type I	cd24 neutrophil	1.28873	1	0.08	0.426667	0	0
230800	Gaucher Disease, Type I	erythrocyte	-1.73144	1	0.964	0.998	0	0
230800	Gaucher Disease, Type I	erythroid progenitor	-0.259646	1	0.748	0.998	0	0
230800	Gaucher Disease, Type I	granulocyte	-0.082144	1	0.724	0.998	0	0
230800	Gaucher Disease, Type I	hematopoietic stem cell	-0.215639	1	0.783	0.998	0	0
230800	Gaucher Disease, Type I	macrophage	2.11628	1	0.014	0.224	0	1
230800	Gaucher Disease, Type I	memory b cell	-1.00501	1	0.997	0.998	0	0
230800	Gaucher Disease, Type I	monocyte	-0.388544	1	0.892	0.998	0	0
230800	Gaucher Disease, Type I	myeloid progenitor	-1.33114	1	0.998	0.998	0	0
230800	Gaucher Disease, Type I	naive b cell	-0.392752	1	0.794	0.998	0	0
230800	Gaucher Disease, Type I	nampt neutrophil	-0.633973	1	0.705	0.998	0	0
230800	Gaucher Disease, Type I	neutrophil	0.192317	1	0.191	0.509333	0	0
230800	Gaucher Disease, Type I	nk cell	1.09411	1	0.15	0.48	0	0
230800	Gaucher Disease, Type I	plasma cell	0.391196	1	0.039	0.312	0	0
230900	Gaucher Disease, Type Ii	cd4-positive, alpha-beta t cell	0.0275743	1	0.244	0.557714	0	0
230900	Gaucher Disease, Type Ii	cd8-positive, alpha-beta t cell	0.930079	1	0.124	0.437333	0	0
230900	Gaucher Disease, Type Ii	cd24 neutrophil	1.28873	1	0.084	0.437333	0	0
230900	Gaucher Disease, Type Ii	erythrocyte	-1.73144	1	0.956	0.999	0	0
230900	Gaucher Disease, Type Ii	erythroid progenitor	-0.259646	1	0.729	0.999	0	0
230900	Gaucher Disease, Type Ii	granulocyte	-0.082144	1	0.703	0.999	0	0
230900	Gaucher Disease, Type Ii	hematopoietic stem cell	-0.215639	1	0.78	0.999	0	0
230900	Gaucher Disease, Type Ii	macrophage	2.11628	1	0.012	0.192	0	1
230900	Gaucher Disease, Type Ii	memory b cell	-1.00501	1	0.993	0.999	0	0
230900	Gaucher Disease, Type Ii	monocyte	-0.388544	1	0.89	0.999	0	0
230900	Gaucher Disease, Type Ii	myeloid progenitor	-1.33114	1	0.999	0.999	0	0
230900	Gaucher Disease, Type Ii	naive b cell	-0.392752	1	0.782	0.999	0	0
230900	Gaucher Disease, Type Ii	nampt neutrophil	-0.633973	1	0.718	0.999	0	0
230900	Gaucher Disease, Type Ii	neutrophil	0.192317	1	0.164	0.437333	0	0
230900	Gaucher Disease, Type Ii	nk cell	1.09411	1	0.154	0.437333	0	0
230900	Gaucher Disease, Type Ii	plasma cell	0.391196	1	0.028	0.224	0	0
231000	Gaucher Disease, Type Iii	cd4-positive, alpha-beta t cell	0.0275743	1	0.247	0.564571	0	0
231000	Gaucher Disease, Type Iii	cd8-positive, alpha-beta t cell	0.930079	1	0.135	0.464	0	0
231000	Gaucher Disease, Type Iii	cd24 neutrophil	1.28873	1	0.078	0.416	0	0
231000	Gaucher Disease, Type Iii	erythrocyte	-1.73144	1	0.948	1	0	0
231000	Gaucher Disease, Type Iii	erythroid progenitor	-0.259646	1	0.732	1	0	0
231000	Gaucher Disease, Type Iii	granulocyte	-0.082144	1	0.706	1	0	0
231000	Gaucher Disease, Type Iii	hematopoietic stem cell	-0.215639	1	0.763	1	0	0
231000	Gaucher Disease, Type Iii	macrophage	2.11628	1	0.011	0.176	0	1
231000	Gaucher Disease, Type Iii	memory b cell	-1.00501	1	0.995	1	0	0
231000	Gaucher Disease, Type Iii	monocyte	-0.388544	1	0.883	1	0	0
231000	Gaucher Disease, Type Iii	myeloid progenitor	-1.33114	1	1	1	0	0
231000	Gaucher Disease, Type Iii	naive b cell	-0.392752	1	0.795	1	0	0
231000	Gaucher Disease, Type Iii	nampt neutrophil	-0.633973	1	0.689	1	0	0
231000	Gaucher Disease, Type Iii	neutrophil	0.192317	1	0.182	0.485333	0	0
231000	Gaucher Disease, Type Iii	nk cell	1.09411	1	0.145	0.464	0	0
231000	Gaucher Disease, Type Iii	plasma cell	0.391196	1	0.035	0.28	0	0
231005	Gaucher Disease, Type Iiic	cd4-positive, alpha-beta t cell	0.0275743	1	0.25	0.571429	0	0
231005	Gaucher Disease, Type Iiic	cd8-positive, alpha-beta t cell	0.930079	1	0.132	0.44	0	0
231005	Gaucher Disease, Type Iiic	cd24 neutrophil	1.28873	1	0.087	0.44	0	0
231005	Gaucher Disease, Type Iiic	erythrocyte	-1.73144	1	0.964	0.999	0	0
231005	Gaucher Disease, Type Iiic	erythroid progenitor	-0.259646	1	0.76	0.999	0	0
231005	Gaucher Disease, Type Iiic	granulocyte	-0.082144	1	0.711	0.999	0	0
231005	Gaucher Disease, Type Iiic	hematopoietic stem cell	-0.215639	1	0.779	0.999	0	0
231005	Gaucher Disease, Type Iiic	macrophage	2.11628	1	0.016	0.248	0	0
231005	Gaucher Disease, Type Iiic	memory b cell	-1.00501	1	0.99	0.999	0	0
231005	Gaucher Disease, Type Iiic	monocyte	-0.388544	1	0.891	0.999	0	0
231005	Gaucher Disease, Type Iiic	myeloid progenitor	-1.33114	1	0.999	0.999	0	0
231005	Gaucher Disease, Type Iiic	naive b cell	-0.392752	1	0.783	0.999	0	0
231005	Gaucher Disease, Type Iiic	nampt neutrophil	-0.633973	1	0.698	0.999	0	0
231005	Gaucher Disease, Type Iiic	neutrophil	0.192317	1	0.142	0.44	0	0
231005	Gaucher Disease, Type Iiic	nk cell	1.09411	1	0.165	0.44	0	0
231005	Gaucher Disease, Type Iiic	plasma cell	0.391196	1	0.031	0.248	0	0
231095	Ghosal Hematodiaphyseal Dysplasia	cd4-positive, alpha-beta t cell	-0.879967	1	0.992	0.998	0	0
231095	Ghosal Hematodiaphyseal Dysplasia	cd8-positive, alpha-beta t cell	-0.967854	1	0.998	0.998	0	0
231095	Ghosal Hematodiaphyseal Dysplasia	cd24 neutrophil	0.336741	1	0.172	0.5504	0	0
231095	Ghosal Hematodiaphyseal Dysplasia	erythrocyte	-1.0368	1	0.737	0.998	0	0
231095	Ghosal Hematodiaphyseal Dysplasia	erythroid progenitor	-0.414985	1	0.774	0.998	0	0
231095	Ghosal Hematodiaphyseal Dysplasia	granulocyte	-0.292824	1	0.821	0.998	0	0
231095	Ghosal Hematodiaphyseal Dysplasia	hematopoietic stem cell	0.286626	1	0.233	0.614	0	0
231095	Ghosal Hematodiaphyseal Dysplasia	macrophage	2.48052	1	0.016	0.2	0	0
231095	Ghosal Hematodiaphyseal Dysplasia	memory b cell	-0.792913	1	0.971	0.998	0	0
231095	Ghosal Hematodiaphyseal Dysplasia	monocyte	1.5567	1	0.025	0.2	0	0
231095	Ghosal Hematodiaphyseal Dysplasia	myeloid progenitor	0.0219656	1	0.287	0.614	0	0
231095	Ghosal Hematodiaphyseal Dysplasia	naive b cell	-1.05314	1	0.984	0.998	0	0
231095	Ghosal Hematodiaphyseal Dysplasia	nampt neutrophil	0.570325	1	0.116	0.548	0	0
231095	Ghosal Hematodiaphyseal Dysplasia	neutrophil	0.716346	1	0.137	0.548	0	0
231095	Ghosal Hematodiaphyseal Dysplasia	nk cell	0.217639	1	0.307	0.614	0	0
231095	Ghosal Hematodiaphyseal Dysplasia	plasma cell	-0.748374	1	0.699	0.998	0	0
231900	Glutathione Synthetase Deficiency Of Erythrocytes, Hemolytic Anemiadue To	cd4-positive, alpha-beta t cell	0.330004	1	0.17	0.418	0	0
231900	Glutathione Synthetase Deficiency Of Erythrocytes, Hemolytic Anemiadue To	cd8-positive, alpha-beta t cell	0.200409	1	0.28	0.497778	0	0
231900	Glutathione Synthetase Deficiency Of Erythrocytes, Hemolytic Anemiadue To	cd24 neutrophil	-1.02568	1	0.904	0.925	0	0
231900	Glutathione Synthetase Deficiency Of Erythrocytes, Hemolytic Anemiadue To	erythrocyte	-1.27812	1	0.835	0.925	0	0
231900	Glutathione Synthetase Deficiency Of Erythrocytes, Hemolytic Anemiadue To	erythroid progenitor	1.86461	1	0.05	0.418	0	0
231900	Glutathione Synthetase Deficiency Of Erythrocytes, Hemolytic Anemiadue To	granulocyte	0.883681	1	0.105	0.418	0	0
231900	Glutathione Synthetase Deficiency Of Erythrocytes, Hemolytic Anemiadue To	hematopoietic stem cell	0.501305	1	0.169	0.418	0	0
231900	Glutathione Synthetase Deficiency Of Erythrocytes, Hemolytic Anemiadue To	macrophage	0.875605	1	0.076	0.418	0	0
231900	Glutathione Synthetase Deficiency Of Erythrocytes, Hemolytic Anemiadue To	memory b cell	-0.501319	1	0.873	0.925	0	0
231900	Glutathione Synthetase Deficiency Of Erythrocytes, Hemolytic Anemiadue To	monocyte	0.107001	1	0.204	0.418	0	0
231900	Glutathione Synthetase Deficiency Of Erythrocytes, Hemolytic Anemiadue To	myeloid progenitor	1.38567	1	0.083	0.418	0	0
231900	Glutathione Synthetase Deficiency Of Erythrocytes, Hemolytic Anemiadue To	naive b cell	-0.730581	1	0.925	0.925	0	0
231900	Glutathione Synthetase Deficiency Of Erythrocytes, Hemolytic Anemiadue To	nampt neutrophil	-1.26455	1	0.891	0.925	0	0
231900	Glutathione Synthetase Deficiency Of Erythrocytes, Hemolytic Anemiadue To	neutrophil	-1.30158	1	0.908	0.925	0	0
231900	Glutathione Synthetase Deficiency Of Erythrocytes, Hemolytic Anemiadue To	nk cell	0.639652	1	0.209	0.418	0	0
231900	Glutathione Synthetase Deficiency Of Erythrocytes, Hemolytic Anemiadue To	plasma cell	-0.686101	1	0.696	0.925	0	0
232220	Glycogen Storage Disease Ib	cd4-positive, alpha-beta t cell	-0.234018	1	0.73	0.863	0	0
232220	Glycogen Storage Disease Ib	cd8-positive, alpha-beta t cell	-0.133805	1	0.766	0.863	0	0
232220	Glycogen Storage Disease Ib	cd24 neutrophil	-0.760878	1	0.82	0.863	0	0
232220	Glycogen Storage Disease Ib	erythrocyte	-0.947319	1	0.689	0.863	0	0
232220	Glycogen Storage Disease Ib	erythroid progenitor	2.88894	1	0.007	0.112	0	0
232220	Glycogen Storage Disease Ib	granulocyte	0.188028	1	0.25	0.8	0	0
232220	Glycogen Storage Disease Ib	hematopoietic stem cell	0.680798	1	0.116	0.618667	0	0
232220	Glycogen Storage Disease Ib	macrophage	-0.595723	1	0.863	0.863	0	0
232220	Glycogen Storage Disease Ib	memory b cell	-0.0226821	1	0.673	0.863	0	0
232220	Glycogen Storage Disease Ib	monocyte	-0.281952	1	0.805	0.863	0	0
232220	Glycogen Storage Disease Ib	myeloid progenitor	1.43954	1	0.092	0.618667	0	0
232220	Glycogen Storage Disease Ib	naive b cell	0.304234	1	0.164	0.656	0	0
232220	Glycogen Storage Disease Ib	nampt neutrophil	-0.866195	1	0.793	0.863	0	0
232220	Glycogen Storage Disease Ib	neutrophil	-0.947319	1	0.791	0.863	0	0
232220	Glycogen Storage Disease Ib	nk cell	-0.126144	1	0.797	0.863	0	0
232220	Glycogen Storage Disease Ib	plasma cell	-0.585505	1	0.619	0.863	0	0
232800	Glycogen Storage Disease Vii	cd4-positive, alpha-beta t cell	0.110078	1	0.225	0.6	0	0
232800	Glycogen Storage Disease Vii	cd8-positive, alpha-beta t cell	-0.452546	1	0.89	0.991	0	0
232800	Glycogen Storage Disease Vii	cd24 neutrophil	-0.76139	1	0.829	0.991	0	0
232800	Glycogen Storage Disease Vii	erythrocyte	0.258381	1	0.052	0.277333	0	0
232800	Glycogen Storage Disease Vii	erythroid progenitor	2.7522	1	0.016	0.256	0	0
232800	Glycogen Storage Disease Vii	granulocyte	-0.559692	1	0.937	0.991	0	0
232800	Glycogen Storage Disease Vii	hematopoietic stem cell	1.23564	1	0.048	0.277333	0	0
232800	Glycogen Storage Disease Vii	macrophage	-0.529248	1	0.835	0.991	0	0
232800	Glycogen Storage Disease Vii	memory b cell	0.710289	1	0.079	0.316	0	0
232800	Glycogen Storage Disease Vii	monocyte	-0.513516	1	0.94	0.991	0	0
232800	Glycogen Storage Disease Vii	myeloid progenitor	0.928455	1	0.144	0.4608	0	0
232800	Glycogen Storage Disease Vii	naive b cell	-1.03543	1	0.991	0.991	0	0
232800	Glycogen Storage Disease Vii	nampt neutrophil	-0.78423	1	0.745	0.991	0	0
232800	Glycogen Storage Disease Vii	neutrophil	-1.03543	1	0.819	0.991	0	0
232800	Glycogen Storage Disease Vii	nk cell	-0.161608	1	0.796	0.991	0	0
232800	Glycogen Storage Disease Vii	plasma cell	-0.161945	1	0.483	0.991	0	0
PS306400	Granulomatous disease, chronic	cd4-positive, alpha-beta t cell	-0.53202	5	0.994	1	0	0
PS306400	Granulomatous disease, chronic	cd8-positive, alpha-beta t cell	-0.534922	5	0.995	1	0	0
PS306400	Granulomatous disease, chronic	cd24 neutrophil	0.65958	5	0.016	0.0704	0	0
PS306400	Granulomatous disease, chronic	erythrocyte	-0.765771	5	0.765	1	0	0
PS306400	Granulomatous disease, chronic	erythroid progenitor	-0.75992	5	0.996	1	0	0
PS306400	Granulomatous disease, chronic	granulocyte	-0.165929	5	0.902	1	0	1
PS306400	Granulomatous disease, chronic	hematopoietic stem cell	-0.61485	5	0.999	1	0	0
PS306400	Granulomatous disease, chronic	macrophage	0.348262	5	0.021	0.0704	0	0
PS306400	Granulomatous disease, chronic	memory b cell	0.261393	5	0.034	0.0906667	0	0
PS306400	Granulomatous disease, chronic	monocyte	0.438149	5	0.016	0.0704	0	0
PS306400	Granulomatous disease, chronic	myeloid progenitor	-0.753698	5	1	1	0	0
PS306400	Granulomatous disease, chronic	naive b cell	0.24223	5	0.059	0.134857	0	0
PS306400	Granulomatous disease, chronic	nampt neutrophil	1.43344	5	0.004	0.064	1	0
PS306400	Granulomatous disease, chronic	neutrophil	1.03692	5	0.022	0.0704	1	1
PS306400	Granulomatous disease, chronic	nk cell	-0.532337	5	1	1	0	0
PS306400	Granulomatous disease, chronic	plasma cell	-0.52201	5	0.697	1	0	0
PS235400	Hemolytic uremic syndrome	cd4-positive, alpha-beta t cell	0.509023	3	0.044	0.352	0	0
PS235400	Hemolytic uremic syndrome	cd8-positive, alpha-beta t cell	-0.02052	3	0.858	0.965	0	0
PS235400	Hemolytic uremic syndrome	cd24 neutrophil	-0.483547	3	0.817	0.965	0	0
PS235400	Hemolytic uremic syndrome	erythrocyte	-0.866145	3	0.778	0.965	0	1
PS235400	Hemolytic uremic syndrome	erythroid progenitor	-0.33476	3	0.846	0.965	0	0
PS235400	Hemolytic uremic syndrome	granulocyte	-0.484144	3	0.965	0.965	0	0
PS235400	Hemolytic uremic syndrome	hematopoietic stem cell	0.868722	3	0.02	0.32	0	0
PS235400	Hemolytic uremic syndrome	macrophage	-0.524188	3	0.935	0.965	0	0
PS235400	Hemolytic uremic syndrome	memory b cell	-0.451399	3	0.922	0.965	0	0
PS235400	Hemolytic uremic syndrome	monocyte	-0.13908	3	0.817	0.965	0	0
PS235400	Hemolytic uremic syndrome	myeloid progenitor	0.386265	3	0.145	0.773333	0	0
PS235400	Hemolytic uremic syndrome	naive b cell	-0.453556	3	0.909	0.965	0	0
PS235400	Hemolytic uremic syndrome	nampt neutrophil	-0.5139	3	0.727	0.965	0	0
PS235400	Hemolytic uremic syndrome	neutrophil	-0.5139	3	0.754	0.965	0	0
PS235400	Hemolytic uremic syndrome	nk cell	-0.264667	3	0.933	0.965	0	0
PS235400	Hemolytic uremic syndrome	plasma cell	-0.705417	3	0.761	0.965	0	0
235700	Hexokinase Deficiency Hemolytic Anemia	cd4-positive, alpha-beta t cell	-0.45176	1	0.862	0.998	0	0
235700	Hexokinase Deficiency Hemolytic Anemia	cd8-positive, alpha-beta t cell	-0.135314	1	0.783	0.998	0	0
235700	Hexokinase Deficiency Hemolytic Anemia	cd24 neutrophil	1.35459	1	0.077	0.308	0	0
235700	Hexokinase Deficiency Hemolytic Anemia	erythrocyte	0.00226492	1	0.067	0.308	0	0
235700	Hexokinase Deficiency Hemolytic Anemia	erythroid progenitor	0.241306	1	0.241	0.482	0	0
235700	Hexokinase Deficiency Hemolytic Anemia	granulocyte	0.576823	1	0.147	0.336	0	0
235700	Hexokinase Deficiency Hemolytic Anemia	hematopoietic stem cell	-1.14447	1	0.998	0.998	0	0
235700	Hexokinase Deficiency Hemolytic Anemia	macrophage	1.87271	1	0.033	0.308	0	0
235700	Hexokinase Deficiency Hemolytic Anemia	memory b cell	-1.0754	1	0.996	0.998	0	0
235700	Hexokinase Deficiency Hemolytic Anemia	monocyte	0.95511	1	0.059	0.308	0	0
235700	Hexokinase Deficiency Hemolytic Anemia	myeloid progenitor	-0.574995	1	0.91	0.998	0	0
235700	Hexokinase Deficiency Hemolytic Anemia	naive b cell	-0.695004	1	0.911	0.998	0	0
235700	Hexokinase Deficiency Hemolytic Anemia	nampt neutrophil	0.268893	1	0.14	0.336	0	0
235700	Hexokinase Deficiency Hemolytic Anemia	neutrophil	1.06911	1	0.109	0.336	0	0
235700	Hexokinase Deficiency Hemolytic Anemia	nk cell	-0.398899	1	0.903	0.998	0	0
235700	Hexokinase Deficiency Hemolytic Anemia	plasma cell	-1.86496	1	0.983	0.998	0	0
236000	Hodgkin Lymphoma	cd4-positive, alpha-beta t cell	-0.265914	1	0.785	0.951	0	0
236000	Hodgkin Lymphoma	cd8-positive, alpha-beta t cell	-0.324114	1	0.841	0.951	0	0
236000	Hodgkin Lymphoma	cd24 neutrophil	-0.579839	1	0.75	0.951	0	0
236000	Hodgkin Lymphoma	erythrocyte	-0.592564	1	0.598	0.951	0	0
236000	Hodgkin Lymphoma	erythroid progenitor	1.08665	1	0.116	0.9	0	0
236000	Hodgkin Lymphoma	granulocyte	-0.506528	1	0.927	0.951	0	0
236000	Hodgkin Lymphoma	hematopoietic stem cell	3.26911	1	0.008	0.128	0	0
236000	Hodgkin Lymphoma	macrophage	-0.00912632	1	0.623	0.951	0	0
236000	Hodgkin Lymphoma	memory b cell	-0.505988	1	0.883	0.951	0	0
236000	Hodgkin Lymphoma	monocyte	0.0736353	1	0.225	0.9	0	0
236000	Hodgkin Lymphoma	myeloid progenitor	0.731298	1	0.182	0.9	0	0
236000	Hodgkin Lymphoma	naive b cell	-0.592564	1	0.893	0.951	0	0
236000	Hodgkin Lymphoma	nampt neutrophil	-0.236275	1	0.618	0.951	0	0
236000	Hodgkin Lymphoma	neutrophil	-0.592564	1	0.704	0.951	0	0
236000	Hodgkin Lymphoma	nk cell	-0.507817	1	0.951	0.951	0	0
236000	Hodgkin Lymphoma	plasma cell	-0.447399	1	0.579	0.951	0	1
236270	Homocystinuria-megaloblastic Anemia Due To Defect In Cobalamin Metabolism,cble Complementation Type	cd4-positive, alpha-beta t cell	1.44302	1	0.017	0.272	0	0
236270	Homocystinuria-megaloblastic Anemia Due To Defect In Cobalamin Metabolism,cble Complementation Type	cd8-positive, alpha-beta t cell	1.5579	1	0.038	0.304	0	0
236270	Homocystinuria-megaloblastic Anemia Due To Defect In Cobalamin Metabolism,cble Complementation Type	cd24 neutrophil	-0.65025	1	0.806	0.969	0	0
236270	Homocystinuria-megaloblastic Anemia Due To Defect In Cobalamin Metabolism,cble Complementation Type	erythrocyte	-1.72761	1	0.955	0.969	0	0
236270	Homocystinuria-megaloblastic Anemia Due To Defect In Cobalamin Metabolism,cble Complementation Type	erythroid progenitor	-0.113424	1	0.713	0.969	0	0
236270	Homocystinuria-megaloblastic Anemia Due To Defect In Cobalamin Metabolism,cble Complementation Type	granulocyte	-0.257074	1	0.758	0.969	0	0
236270	Homocystinuria-megaloblastic Anemia Due To Defect In Cobalamin Metabolism,cble Complementation Type	hematopoietic stem cell	-0.578601	1	0.943	0.969	0	0
236270	Homocystinuria-megaloblastic Anemia Due To Defect In Cobalamin Metabolism,cble Complementation Type	macrophage	-0.905482	1	0.969	0.969	0	0
236270	Homocystinuria-megaloblastic Anemia Due To Defect In Cobalamin Metabolism,cble Complementation Type	memory b cell	-0.33598	1	0.803	0.969	0	0
236270	Homocystinuria-megaloblastic Anemia Due To Defect In Cobalamin Metabolism,cble Complementation Type	monocyte	-0.182276	1	0.782	0.969	0	0
236270	Homocystinuria-megaloblastic Anemia Due To Defect In Cobalamin Metabolism,cble Complementation Type	myeloid progenitor	1.29947	1	0.087	0.348	0	0
236270	Homocystinuria-megaloblastic Anemia Due To Defect In Cobalamin Metabolism,cble Complementation Type	naive b cell	0.666786	1	0.142	0.4544	0	0
236270	Homocystinuria-megaloblastic Anemia Due To Defect In Cobalamin Metabolism,cble Complementation Type	nampt neutrophil	-1.16272	1	0.876	0.969	0	0
236270	Homocystinuria-megaloblastic Anemia Due To Defect In Cobalamin Metabolism,cble Complementation Type	neutrophil	-0.36382	1	0.659	0.969	0	0
236270	Homocystinuria-megaloblastic Anemia Due To Defect In Cobalamin Metabolism,cble Complementation Type	nk cell	1.43855	1	0.08	0.348	0	0
236270	Homocystinuria-megaloblastic Anemia Due To Defect In Cobalamin Metabolism,cble Complementation Type	plasma cell	-0.128497	1	0.485	0.969	0	0
238700	Hyperlysinemia	cd4-positive, alpha-beta t cell	-0.286041	1	0.769	0.945	0	0
238700	Hyperlysinemia	cd8-positive, alpha-beta t cell	-0.045306	1	0.745	0.945	0	0
238700	Hyperlysinemia	cd24 neutrophil	-0.699945	1	0.832	0.945	0	0
238700	Hyperlysinemia	erythrocyte	-0.36917	1	0.523	0.945	0	0
238700	Hyperlysinemia	erythroid progenitor	0.161549	1	0.213	0.6816	0	0
238700	Hyperlysinemia	granulocyte	-0.496836	1	0.918	0.945	0	0
238700	Hyperlysinemia	hematopoietic stem cell	2.99769	1	0.009	0.144	0	0
238700	Hyperlysinemia	macrophage	-0.669117	1	0.899	0.945	0	0
238700	Hyperlysinemia	memory b cell	-0.124032	1	0.649	0.945	0	0
238700	Hyperlysinemia	monocyte	0.86579	1	0.057	0.456	0	0
238700	Hyperlysinemia	myeloid progenitor	1.33913	1	0.09	0.48	0	0
238700	Hyperlysinemia	naive b cell	0.11717	1	0.207	0.6816	0	0
238700	Hyperlysinemia	nampt neutrophil	-0.760413	1	0.757	0.945	0	0
238700	Hyperlysinemia	neutrophil	-0.815956	1	0.766	0.945	0	0
238700	Hyperlysinemia	nk cell	-0.485567	1	0.945	0.945	0	0
238700	Hyperlysinemia	plasma cell	-0.728943	1	0.717	0.945	0	0
PS607594	Immunodeficiency, common variable	cd4-positive, alpha-beta t cell	0.214613	6	0.048	0.384	0	0
PS607594	Immunodeficiency, common variable	cd8-positive, alpha-beta t cell	1.23746	6	0.001	0.016	1	0
PS607594	Immunodeficiency, common variable	cd24 neutrophil	-0.323956	6	0.851	0.992	0	0
PS607594	Immunodeficiency, common variable	erythrocyte	-0.708592	6	0.761	0.992	0	0
PS607594	Immunodeficiency, common variable	erythroid progenitor	-0.365996	6	0.956	0.992	0	0
PS607594	Immunodeficiency, common variable	granulocyte	-0.37678	6	0.992	0.992	0	0
PS607594	Immunodeficiency, common variable	hematopoietic stem cell	-0.330874	6	0.982	0.992	0	0
PS607594	Immunodeficiency, common variable	macrophage	-0.390615	6	0.958	0.992	0	0
PS607594	Immunodeficiency, common variable	memory b cell	0.0773096	6	0.096	0.384	0	1
PS607594	Immunodeficiency, common variable	monocyte	-0.318287	6	0.986	0.992	0	0
PS607594	Immunodeficiency, common variable	myeloid progenitor	-0.341019	6	0.972	0.992	0	0
PS607594	Immunodeficiency, common variable	naive b cell	-0.135035	6	0.766	0.992	0	1
PS607594	Immunodeficiency, common variable	nampt neutrophil	-0.35519	6	0.764	0.992	0	0
PS607594	Immunodeficiency, common variable	neutrophil	-0.347735	6	0.77	0.992	0	0
PS607594	Immunodeficiency, common variable	nk cell	0.57035	6	0.081	0.384	0	0
PS607594	Immunodeficiency, common variable	plasma cell	-0.826483	6	0.936	0.992	0	0
241500	Hypophosphatasia, Infantile	cd4-positive, alpha-beta t cell	-0.385734	1	0.811	0.898	0	0
241500	Hypophosphatasia, Infantile	cd8-positive, alpha-beta t cell	-0.3855	1	0.885	0.898	0	0
241500	Hypophosphatasia, Infantile	cd24 neutrophil	-0.0991901	1	0.612	0.898	0	0
241500	Hypophosphatasia, Infantile	erythrocyte	-0.386438	1	0.514	0.898	0	0
241500	Hypophosphatasia, Infantile	erythroid progenitor	-0.377636	1	0.79	0.898	0	0
241500	Hypophosphatasia, Infantile	granulocyte	-0.383925	1	0.846	0.898	0	0
241500	Hypophosphatasia, Infantile	hematopoietic stem cell	-0.386116	1	0.866	0.898	0	0
241500	Hypophosphatasia, Infantile	macrophage	-0.381895	1	0.781	0.898	0	0
241500	Hypophosphatasia, Infantile	memory b cell	-0.375995	1	0.808	0.898	0	0
241500	Hypophosphatasia, Infantile	monocyte	-0.366509	1	0.878	0.898	0	0
241500	Hypophosphatasia, Infantile	myeloid progenitor	-0.385703	1	0.825	0.898	0	0
241500	Hypophosphatasia, Infantile	naive b cell	-0.386438	1	0.794	0.898	0	0
241500	Hypophosphatasia, Infantile	nampt neutrophil	2.86792	1	0.006	0.096	1	0
241500	Hypophosphatasia, Infantile	neutrophil	2.20496	1	0.033	0.264	0	0
241500	Hypophosphatasia, Infantile	nk cell	-0.386438	1	0.898	0.898	0	0
241500	Hypophosphatasia, Infantile	plasma cell	-0.38537	1	0.537	0.898	0	0
242840	Immunodeficiency With Cleft Lip/palate, Cataract, Hypopigmentation,and Absent Corpus Callosum	cd4-positive, alpha-beta t cell	-0.467035	1	0.878	0.984	0	0
242840	Immunodeficiency With Cleft Lip/palate, Cataract, Hypopigmentation,and Absent Corpus Callosum	cd8-positive, alpha-beta t cell	-0.346661	1	0.859	0.984	0	0
242840	Immunodeficiency With Cleft Lip/palate, Cataract, Hypopigmentation,and Absent Corpus Callosum	cd24 neutrophil	1.70789	1	0.056	0.244	0	0
242840	Immunodeficiency With Cleft Lip/palate, Cataract, Hypopigmentation,and Absent Corpus Callosum	erythrocyte	0.61143	1	0.05	0.244	0	0
242840	Immunodeficiency With Cleft Lip/palate, Cataract, Hypopigmentation,and Absent Corpus Callosum	erythroid progenitor	-0.627766	1	0.895	0.984	0	0
242840	Immunodeficiency With Cleft Lip/palate, Cataract, Hypopigmentation,and Absent Corpus Callosum	granulocyte	-0.1649	1	0.758	0.984	0	0
242840	Immunodeficiency With Cleft Lip/palate, Cataract, Hypopigmentation,and Absent Corpus Callosum	hematopoietic stem cell	-0.524066	1	0.906	0.984	0	0
242840	Immunodeficiency With Cleft Lip/palate, Cataract, Hypopigmentation,and Absent Corpus Callosum	macrophage	-0.823243	1	0.947	0.984	0	0
242840	Immunodeficiency With Cleft Lip/palate, Cataract, Hypopigmentation,and Absent Corpus Callosum	memory b cell	-0.629813	1	0.932	0.984	0	0
242840	Immunodeficiency With Cleft Lip/palate, Cataract, Hypopigmentation,and Absent Corpus Callosum	monocyte	-0.129819	1	0.709	0.984	0	0
242840	Immunodeficiency With Cleft Lip/palate, Cataract, Hypopigmentation,and Absent Corpus Callosum	myeloid progenitor	-0.394737	1	0.841	0.984	0	0
242840	Immunodeficiency With Cleft Lip/palate, Cataract, Hypopigmentation,and Absent Corpus Callosum	naive b cell	-1.09992	1	0.984	0.984	0	0
242840	Immunodeficiency With Cleft Lip/palate, Cataract, Hypopigmentation,and Absent Corpus Callosum	nampt neutrophil	1.91133	1	0.043	0.244	0	0
242840	Immunodeficiency With Cleft Lip/palate, Cataract, Hypopigmentation,and Absent Corpus Callosum	neutrophil	1.70789	1	0.061	0.244	0	0
242840	Immunodeficiency With Cleft Lip/palate, Cataract, Hypopigmentation,and Absent Corpus Callosum	nk cell	0.465742	1	0.288	0.9216	0	0
242840	Immunodeficiency With Cleft Lip/palate, Cataract, Hypopigmentation,and Absent Corpus Callosum	plasma cell	-1.19632	1	0.878	0.984	0	0
PS242860	Immunodeficiency-centromeric instability-facial anomalies	cd4-positive, alpha-beta t cell	-0.49045	1	0.887	0.917	0	0
PS242860	Immunodeficiency-centromeric instability-facial anomalies	cd8-positive, alpha-beta t cell	-0.461759	1	0.898	0.917	0	0
PS242860	Immunodeficiency-centromeric instability-facial anomalies	cd24 neutrophil	-0.483147	1	0.718	0.917	0	0
PS242860	Immunodeficiency-centromeric instability-facial anomalies	erythrocyte	-0.50301	1	0.571	0.917	0	0
PS242860	Immunodeficiency-centromeric instability-facial anomalies	erythroid progenitor	0.897101	1	0.133	0.709333	0	0
PS242860	Immunodeficiency-centromeric instability-facial anomalies	granulocyte	-0.110891	1	0.725	0.917	0	0
PS242860	Immunodeficiency-centromeric instability-facial anomalies	hematopoietic stem cell	2.10154	1	0.017	0.136	0	0
PS242860	Immunodeficiency-centromeric instability-facial anomalies	macrophage	-0.50301	1	0.818	0.917	0	0
PS242860	Immunodeficiency-centromeric instability-facial anomalies	memory b cell	-0.50301	1	0.881	0.917	0	0
PS242860	Immunodeficiency-centromeric instability-facial anomalies	monocyte	-0.222983	1	0.781	0.917	0	0
PS242860	Immunodeficiency-centromeric instability-facial anomalies	myeloid progenitor	2.66905	1	0.007	0.112	0	0
PS242860	Immunodeficiency-centromeric instability-facial anomalies	naive b cell	-0.50301	1	0.83	0.917	0	0
PS242860	Immunodeficiency-centromeric instability-facial anomalies	nampt neutrophil	-0.50301	1	0.658	0.917	0	0
PS242860	Immunodeficiency-centromeric instability-facial anomalies	neutrophil	-0.50301	1	0.692	0.917	0	0
PS242860	Immunodeficiency-centromeric instability-facial anomalies	nk cell	-0.442841	1	0.917	0.917	0	0
PS242860	Immunodeficiency-centromeric instability-facial anomalies	plasma cell	-0.437562	1	0.554	0.917	0	0
242900	Immunoosseous Dysplasia, Schimke Type	cd4-positive, alpha-beta t cell	0.299223	1	0.176	0.364	0	0
242900	Immunoosseous Dysplasia, Schimke Type	cd8-positive, alpha-beta t cell	1.05617	1	0.107	0.364	0	0
242900	Immunoosseous Dysplasia, Schimke Type	cd24 neutrophil	-0.96885	1	0.898	0.947	0	0
242900	Immunoosseous Dysplasia, Schimke Type	erythrocyte	-1.64564	1	0.939	0.947	0	0
242900	Immunoosseous Dysplasia, Schimke Type	erythroid progenitor	0.741124	1	0.162	0.364	0	0
242900	Immunoosseous Dysplasia, Schimke Type	granulocyte	0.388573	1	0.182	0.364	0	0
242900	Immunoosseous Dysplasia, Schimke Type	hematopoietic stem cell	0.997818	1	0.068	0.364	0	0
242900	Immunoosseous Dysplasia, Schimke Type	macrophage	-0.297665	1	0.75	0.947	0	0
242900	Immunoosseous Dysplasia, Schimke Type	memory b cell	0.790003	1	0.079	0.364	0	0
242900	Immunoosseous Dysplasia, Schimke Type	monocyte	0.00428286	1	0.253	0.4048	0	0
242900	Immunoosseous Dysplasia, Schimke Type	myeloid progenitor	1.44861	1	0.075	0.364	0	0
242900	Immunoosseous Dysplasia, Schimke Type	naive b cell	0.0531	1	0.231	0.4048	0	0
242900	Immunoosseous Dysplasia, Schimke Type	nampt neutrophil	-1.40149	1	0.947	0.947	0	0
242900	Immunoosseous Dysplasia, Schimke Type	neutrophil	-1.26517	1	0.922	0.947	0	0
242900	Immunoosseous Dysplasia, Schimke Type	nk cell	0.913227	1	0.176	0.364	0	0
242900	Immunoosseous Dysplasia, Schimke Type	plasma cell	-1.11331	1	0.848	0.947	0	0
243150	Gastrointestinal Defects And Immunodeficiency Syndrome	cd4-positive, alpha-beta t cell	-0.296267	1	0.784	0.941867	0	0
243150	Gastrointestinal Defects And Immunodeficiency Syndrome	cd8-positive, alpha-beta t cell	-0.297019	1	0.813	0.941867	0	0
243150	Gastrointestinal Defects And Immunodeficiency Syndrome	cd24 neutrophil	-0.801831	1	0.855	0.941867	0	0
243150	Gastrointestinal Defects And Immunodeficiency Syndrome	erythrocyte	-0.989268	1	0.725	0.941867	0	0
243150	Gastrointestinal Defects And Immunodeficiency Syndrome	erythroid progenitor	-0.595835	1	0.863	0.941867	0	0
243150	Gastrointestinal Defects And Immunodeficiency Syndrome	granulocyte	1.56174	1	0.027	0.165333	0	0
243150	Gastrointestinal Defects And Immunodeficiency Syndrome	hematopoietic stem cell	-0.331152	1	0.818	0.941867	0	0
243150	Gastrointestinal Defects And Immunodeficiency Syndrome	macrophage	1.81623	1	0.031	0.165333	0	0
243150	Gastrointestinal Defects And Immunodeficiency Syndrome	memory b cell	0.965957	1	0.064	0.2336	0	1
243150	Gastrointestinal Defects And Immunodeficiency Syndrome	monocyte	1.39917	1	0.026	0.165333	0	0
243150	Gastrointestinal Defects And Immunodeficiency Syndrome	myeloid progenitor	-0.856805	1	0.977	0.977	0	0
243150	Gastrointestinal Defects And Immunodeficiency Syndrome	naive b cell	1.13987	1	0.073	0.2336	0	0
243150	Gastrointestinal Defects And Immunodeficiency Syndrome	nampt neutrophil	-0.78113	1	0.756	0.941867	0	0
243150	Gastrointestinal Defects And Immunodeficiency Syndrome	neutrophil	-0.989268	1	0.818	0.941867	0	0
243150	Gastrointestinal Defects And Immunodeficiency Syndrome	nk cell	-0.32888	1	0.883	0.941867	0	0
243150	Gastrointestinal Defects And Immunodeficiency Syndrome	plasma cell	-0.615518	1	0.61	0.941867	0	0
243500	Isovaleric Acidemia	cd4-positive, alpha-beta t cell	-0.295914	1	0.8	0.915	0	0
243500	Isovaleric Acidemia	cd8-positive, alpha-beta t cell	0.804225	1	0.157	0.446	0	0
243500	Isovaleric Acidemia	cd24 neutrophil	-1.03776	1	0.915	0.915	0	0
243500	Isovaleric Acidemia	erythrocyte	-1.34452	1	0.866	0.915	0	0
243500	Isovaleric Acidemia	erythroid progenitor	1.17586	1	0.121	0.446	0	0
243500	Isovaleric Acidemia	granulocyte	0.319421	1	0.185	0.446	0	0
243500	Isovaleric Acidemia	hematopoietic stem cell	1.20548	1	0.04	0.32	0	0
243500	Isovaleric Acidemia	macrophage	-0.508026	1	0.827	0.915	0	0
243500	Isovaleric Acidemia	memory b cell	0.0808977	1	0.21	0.446	0	0
243500	Isovaleric Acidemia	monocyte	0.01042	1	0.223	0.446	0	0
243500	Isovaleric Acidemia	myeloid progenitor	2.0041	1	0.032	0.32	0	0
243500	Isovaleric Acidemia	naive b cell	-0.303235	1	0.76	0.915	0	0
243500	Isovaleric Acidemia	nampt neutrophil	-1.30309	1	0.909	0.915	0	0
243500	Isovaleric Acidemia	neutrophil	-0.776977	1	0.777	0.915	0	0
243500	Isovaleric Acidemia	nk cell	0.924722	1	0.189	0.446	0	0
243500	Isovaleric Acidemia	plasma cell	-0.955598	1	0.799	0.915	0	0
245200	Krabbe Disease	cd4-positive, alpha-beta t cell	-0.33472	1	0.809	0.988	0	0
245200	Krabbe Disease	cd8-positive, alpha-beta t cell	0.320443	1	0.252	0.576	0	0
245200	Krabbe Disease	cd24 neutrophil	1.29003	1	0.073	0.498667	0	0
245200	Krabbe Disease	erythrocyte	-0.670217	1	0.624	0.988	0	0
245200	Krabbe Disease	erythroid progenitor	-0.360156	1	0.782	0.988	0	0
245200	Krabbe Disease	granulocyte	-0.336405	1	0.832	0.988	0	0
245200	Krabbe Disease	hematopoietic stem cell	-0.711073	1	0.968	0.988	0	0
245200	Krabbe Disease	macrophage	0.178011	1	0.187	0.498667	0	0
245200	Krabbe Disease	memory b cell	-0.948857	1	0.988	0.988	0	0
245200	Krabbe Disease	monocyte	0.373289	1	0.144	0.498667	0	0
245200	Krabbe Disease	myeloid progenitor	0.0298506	1	0.294	0.588	0	0
245200	Krabbe Disease	naive b cell	-0.931709	1	0.968	0.988	0	0
245200	Krabbe Disease	nampt neutrophil	0.0139674	1	0.164	0.498667	0	0
245200	Krabbe Disease	neutrophil	0.34349	1	0.16	0.498667	0	0
245200	Krabbe Disease	nk cell	2.91458	1	0.007	0.112	0	0
245200	Krabbe Disease	plasma cell	-1.17052	1	0.882	0.988	0	0
PS245480	Specific granule deficiency	cd4-positive, alpha-beta t cell	-0.337416	2	0.896	0.974	0	0
PS245480	Specific granule deficiency	cd8-positive, alpha-beta t cell	-0.27425	2	0.905	0.974	0	0
PS245480	Specific granule deficiency	cd24 neutrophil	2.35811	2	0.002	0.032	1	0
PS245480	Specific granule deficiency	erythrocyte	-1.0459	2	0.862	0.974	0	0
PS245480	Specific granule deficiency	erythroid progenitor	-0.172801	2	0.662	0.974	0	0
PS245480	Specific granule deficiency	granulocyte	1.23977	2	0.012	0.096	1	0
PS245480	Specific granule deficiency	hematopoietic stem cell	-0.0636363	2	0.673	0.974	0	0
PS245480	Specific granule deficiency	macrophage	0.00271195	2	0.308	0.974	0	0
PS245480	Specific granule deficiency	memory b cell	-0.580176	2	0.974	0.974	0	0
PS245480	Specific granule deficiency	monocyte	0.0986244	2	0.286	0.974	0	0
PS245480	Specific granule deficiency	myeloid progenitor	-0.0960154	2	0.687	0.974	0	0
PS245480	Specific granule deficiency	naive b cell	-0.406411	2	0.861	0.974	0	0
PS245480	Specific granule deficiency	nampt neutrophil	-0.144519	2	0.467	0.974	0	0
PS245480	Specific granule deficiency	neutrophil	0.674707	2	0.121	0.645333	0	1
PS245480	Specific granule deficiency	nk cell	-0.369537	2	0.968	0.974	0	0
PS245480	Specific granule deficiency	plasma cell	-0.883266	2	0.842	0.974	0	0
246450	3-hydroxy-3-methylglutaryl-coa Lyase Deficiency	cd4-positive, alpha-beta t cell	-0.571628	1	0.932	0.992	0	0
246450	3-hydroxy-3-methylglutaryl-coa Lyase Deficiency	cd8-positive, alpha-beta t cell	0.436183	1	0.231	0.410667	0	0
246450	3-hydroxy-3-methylglutaryl-coa Lyase Deficiency	cd24 neutrophil	-0.842597	1	0.843	0.992	0	0
246450	3-hydroxy-3-methylglutaryl-coa Lyase Deficiency	erythrocyte	-0.83942	1	0.681	0.992	0	0
246450	3-hydroxy-3-methylglutaryl-coa Lyase Deficiency	erythroid progenitor	0.575102	1	0.178	0.368	0	0
246450	3-hydroxy-3-methylglutaryl-coa Lyase Deficiency	granulocyte	0.582795	1	0.157	0.368	0	0
246450	3-hydroxy-3-methylglutaryl-coa Lyase Deficiency	hematopoietic stem cell	0.487527	1	0.184	0.368	0	0
246450	3-hydroxy-3-methylglutaryl-coa Lyase Deficiency	macrophage	1.40361	1	0.039	0.368	0	0
246450	3-hydroxy-3-methylglutaryl-coa Lyase Deficiency	memory b cell	-0.119721	1	0.698	0.992	0	0
246450	3-hydroxy-3-methylglutaryl-coa Lyase Deficiency	monocyte	0.509154	1	0.104	0.368	0	0
246450	3-hydroxy-3-methylglutaryl-coa Lyase Deficiency	myeloid progenitor	1.05702	1	0.141	0.368	0	0
246450	3-hydroxy-3-methylglutaryl-coa Lyase Deficiency	naive b cell	0.797981	1	0.103	0.368	0	0
246450	3-hydroxy-3-methylglutaryl-coa Lyase Deficiency	nampt neutrophil	-1.44596	1	0.943	0.992	0	0
246450	3-hydroxy-3-methylglutaryl-coa Lyase Deficiency	neutrophil	-1.65602	1	0.992	0.992	0	0
246450	3-hydroxy-3-methylglutaryl-coa Lyase Deficiency	nk cell	1.08958	1	0.132	0.368	0	0
246450	3-hydroxy-3-methylglutaryl-coa Lyase Deficiency	plasma cell	-1.4636	1	0.936	0.992	0	0
248500	Mannosidosis, Alpha B, Lysosomal	cd4-positive, alpha-beta t cell	0.279035	1	0.178	0.459429	0	0
248500	Mannosidosis, Alpha B, Lysosomal	cd8-positive, alpha-beta t cell	-0.0737981	1	0.754	0.949333	0	0
248500	Mannosidosis, Alpha B, Lysosomal	cd24 neutrophil	-0.962226	1	0.89	0.949333	0	0
248500	Mannosidosis, Alpha B, Lysosomal	erythrocyte	-1.36864	1	0.868	0.949333	0	0
248500	Mannosidosis, Alpha B, Lysosomal	erythroid progenitor	-0.2204	1	0.738	0.949333	0	0
248500	Mannosidosis, Alpha B, Lysosomal	granulocyte	0.215254	1	0.201	0.459429	0	0
248500	Mannosidosis, Alpha B, Lysosomal	hematopoietic stem cell	0.108227	1	0.255	0.51	0	0
248500	Mannosidosis, Alpha B, Lysosomal	macrophage	2.74677	1	0.006	0.096	1	0
248500	Mannosidosis, Alpha B, Lysosomal	memory b cell	0.763834	1	0.085	0.453333	0	0
248500	Mannosidosis, Alpha B, Lysosomal	monocyte	0.346328	1	0.138	0.459429	0	0
248500	Mannosidosis, Alpha B, Lysosomal	myeloid progenitor	-1.12431	1	0.994	0.994	0	0
248500	Mannosidosis, Alpha B, Lysosomal	naive b cell	0.36666	1	0.15	0.459429	0	0
248500	Mannosidosis, Alpha B, Lysosomal	nampt neutrophil	-0.917667	1	0.8	0.949333	0	0
248500	Mannosidosis, Alpha B, Lysosomal	neutrophil	-0.765681	1	0.767	0.949333	0	0
248500	Mannosidosis, Alpha B, Lysosomal	nk cell	-0.309879	1	0.888	0.949333	0	0
248500	Mannosidosis, Alpha B, Lysosomal	plasma cell	0.916501	1	0.019	0.152	0	0
249100	Familial Mediterranean Fever, Ar	cd4-positive, alpha-beta t cell	-0.602414	1	0.939	0.979	0	0
249100	Familial Mediterranean Fever, Ar	cd8-positive, alpha-beta t cell	-0.60303	1	0.961	0.979	0	0
249100	Familial Mediterranean Fever, Ar	cd24 neutrophil	1.15095	1	0.084	0.448	0	0
249100	Familial Mediterranean Fever, Ar	erythrocyte	-0.576221	1	0.603	0.979	0	0
249100	Familial Mediterranean Fever, Ar	erythroid progenitor	-0.610737	1	0.871	0.979	0	0
249100	Familial Mediterranean Fever, Ar	granulocyte	-0.241677	1	0.794	0.979	0	0
249100	Familial Mediterranean Fever, Ar	hematopoietic stem cell	-0.602556	1	0.948	0.979	0	0
249100	Familial Mediterranean Fever, Ar	macrophage	0.318122	1	0.145	0.464	0	0
249100	Familial Mediterranean Fever, Ar	memory b cell	-0.610737	1	0.924	0.979	0	0
249100	Familial Mediterranean Fever, Ar	monocyte	0.448582	1	0.135	0.464	0	0
249100	Familial Mediterranean Fever, Ar	myeloid progenitor	-0.604968	1	0.934	0.979	0	0
249100	Familial Mediterranean Fever, Ar	naive b cell	-0.610737	1	0.883	0.979	0	0
249100	Familial Mediterranean Fever, Ar	nampt neutrophil	2.4354	1	0.027	0.384	0	0
249100	Familial Mediterranean Fever, Ar	neutrophil	1.9315	1	0.048	0.384	0	0
249100	Familial Mediterranean Fever, Ar	nk cell	-0.610737	1	0.979	0.979	0	0
249100	Familial Mediterranean Fever, Ar	plasma cell	-0.610737	1	0.661	0.979	0	0
250790	Methemoglobinemia And Ambiguous Genitalia	cd4-positive, alpha-beta t cell	-0.0534943	1	0.718	0.968533	0	0
250790	Methemoglobinemia And Ambiguous Genitalia	cd8-positive, alpha-beta t cell	-0.263185	1	0.817	0.968533	0	0
250790	Methemoglobinemia And Ambiguous Genitalia	cd24 neutrophil	-1.26833	1	0.982	0.982	0	0
250790	Methemoglobinemia And Ambiguous Genitalia	erythrocyte	0.993245	1	0.046	0.368	0	0
250790	Methemoglobinemia And Ambiguous Genitalia	erythroid progenitor	2.67411	1	0.012	0.192	0	0
250790	Methemoglobinemia And Ambiguous Genitalia	granulocyte	-0.295668	1	0.822	0.968533	0	0
250790	Methemoglobinemia And Ambiguous Genitalia	hematopoietic stem cell	0.234212	1	0.254	0.696	0	0
250790	Methemoglobinemia And Ambiguous Genitalia	macrophage	-0.0766214	1	0.656	0.968533	0	0
250790	Methemoglobinemia And Ambiguous Genitalia	memory b cell	0.309857	1	0.17	0.68	0	0
250790	Methemoglobinemia And Ambiguous Genitalia	monocyte	-0.0601927	1	0.708	0.968533	0	0
250790	Methemoglobinemia And Ambiguous Genitalia	myeloid progenitor	0.314094	1	0.261	0.696	0	0
250790	Methemoglobinemia And Ambiguous Genitalia	naive b cell	0.989259	1	0.099	0.528	0	0
250790	Methemoglobinemia And Ambiguous Genitalia	nampt neutrophil	-1.28208	1	0.899	0.968533	0	0
250790	Methemoglobinemia And Ambiguous Genitalia	neutrophil	-1.32229	1	0.908	0.968533	0	0
250790	Methemoglobinemia And Ambiguous Genitalia	nk cell	-0.264884	1	0.857	0.968533	0	0
250790	Methemoglobinemia And Ambiguous Genitalia	plasma cell	-0.628035	1	0.647	0.968533	0	0
250800	Methemoglobinemia Due To Deficiency Of Methemoglobin Reductase	cd4-positive, alpha-beta t cell	-0.743448	1	0.975	0.975	0	0
250800	Methemoglobinemia Due To Deficiency Of Methemoglobin Reductase	cd8-positive, alpha-beta t cell	-0.597114	1	0.959	0.975	0	0
250800	Methemoglobinemia Due To Deficiency Of Methemoglobin Reductase	cd24 neutrophil	-0.482935	1	0.717	0.975	0	0
250800	Methemoglobinemia Due To Deficiency Of Methemoglobin Reductase	erythrocyte	2.31647	1	0.03	0.336	0	0
250800	Methemoglobinemia Due To Deficiency Of Methemoglobin Reductase	erythroid progenitor	1.17758	1	0.102	0.336	0	0
250800	Methemoglobinemia Due To Deficiency Of Methemoglobin Reductase	granulocyte	0.0336538	1	0.289	0.660571	0	0
250800	Methemoglobinemia Due To Deficiency Of Methemoglobin Reductase	hematopoietic stem cell	0.935927	1	0.092	0.336	0	0
250800	Methemoglobinemia Due To Deficiency Of Methemoglobin Reductase	macrophage	-0.015934	1	0.626	0.975	0	0
250800	Methemoglobinemia Due To Deficiency Of Methemoglobin Reductase	memory b cell	0.672923	1	0.094	0.336	0	0
250800	Methemoglobinemia Due To Deficiency Of Methemoglobin Reductase	monocyte	-0.182052	1	0.768	0.975	0	0
250800	Methemoglobinemia Due To Deficiency Of Methemoglobin Reductase	myeloid progenitor	0.390029	1	0.241	0.642667	0	0
250800	Methemoglobinemia Due To Deficiency Of Methemoglobin Reductase	naive b cell	0.686962	1	0.105	0.336	0	0
250800	Methemoglobinemia Due To Deficiency Of Methemoglobin Reductase	nampt neutrophil	-0.936389	1	0.784	0.975	0	0
250800	Methemoglobinemia Due To Deficiency Of Methemoglobin Reductase	neutrophil	-1.26952	1	0.888	0.975	0	0
250800	Methemoglobinemia Due To Deficiency Of Methemoglobin Reductase	nk cell	-0.420129	1	0.9	0.975	0	0
250800	Methemoglobinemia Due To Deficiency Of Methemoglobin Reductase	plasma cell	-1.56602	1	0.951	0.975	0	0
250940	Homocystinuria-megaloblastic Anemia, Cblg Complementation Type	cd4-positive, alpha-beta t cell	0.55496	1	0.118	0.376	0	0
250940	Homocystinuria-megaloblastic Anemia, Cblg Complementation Type	cd8-positive, alpha-beta t cell	0.717041	1	0.182	0.376	0	0
250940	Homocystinuria-megaloblastic Anemia, Cblg Complementation Type	cd24 neutrophil	-1.11169	1	0.921	0.942	0	0
250940	Homocystinuria-megaloblastic Anemia, Cblg Complementation Type	erythrocyte	-1.19508	1	0.803	0.942	0	0
250940	Homocystinuria-megaloblastic Anemia, Cblg Complementation Type	erythroid progenitor	0.706053	1	0.165	0.376	0	0
250940	Homocystinuria-megaloblastic Anemia, Cblg Complementation Type	granulocyte	0.568728	1	0.143	0.376	0	0
250940	Homocystinuria-megaloblastic Anemia, Cblg Complementation Type	hematopoietic stem cell	0.757842	1	0.109	0.376	0	0
250940	Homocystinuria-megaloblastic Anemia, Cblg Complementation Type	macrophage	-0.730561	1	0.942	0.942	0	0
250940	Homocystinuria-megaloblastic Anemia, Cblg Complementation Type	memory b cell	-0.137615	1	0.707	0.942	0	0
250940	Homocystinuria-megaloblastic Anemia, Cblg Complementation Type	monocyte	0.168846	1	0.188	0.376	0	0
250940	Homocystinuria-megaloblastic Anemia, Cblg Complementation Type	myeloid progenitor	2.09379	1	0.027	0.376	0	0
250940	Homocystinuria-megaloblastic Anemia, Cblg Complementation Type	naive b cell	0.942129	1	0.106	0.376	0	0
250940	Homocystinuria-megaloblastic Anemia, Cblg Complementation Type	nampt neutrophil	-1.2917	1	0.892	0.942	0	0
250940	Homocystinuria-megaloblastic Anemia, Cblg Complementation Type	neutrophil	-1.30666	1	0.905	0.942	0	0
250940	Homocystinuria-megaloblastic Anemia, Cblg Complementation Type	nk cell	0.187844	1	0.327	0.581333	0	0
250940	Homocystinuria-megaloblastic Anemia, Cblg Complementation Type	plasma cell	-0.923919	1	0.829	0.942	0	0
251000	Methylmalonic Aciduria Due To Methylmalonyl-coa Mutase Deficiency	cd4-positive, alpha-beta t cell	-0.553432	1	0.928	0.993	0	0
251000	Methylmalonic Aciduria Due To Methylmalonyl-coa Mutase Deficiency	cd8-positive, alpha-beta t cell	-0.250614	1	0.812	0.993	0	0
251000	Methylmalonic Aciduria Due To Methylmalonyl-coa Mutase Deficiency	cd24 neutrophil	1.14807	1	0.074	0.457143	0	0
251000	Methylmalonic Aciduria Due To Methylmalonyl-coa Mutase Deficiency	erythrocyte	-1.40565	1	0.89	0.993	0	0
251000	Methylmalonic Aciduria Due To Methylmalonyl-coa Mutase Deficiency	erythroid progenitor	1.10814	1	0.101	0.457143	0	0
251000	Methylmalonic Aciduria Due To Methylmalonyl-coa Mutase Deficiency	granulocyte	0.324772	1	0.189	0.457143	0	0
251000	Methylmalonic Aciduria Due To Methylmalonyl-coa Mutase Deficiency	hematopoietic stem cell	0.549829	1	0.153	0.457143	0	0
251000	Methylmalonic Aciduria Due To Methylmalonyl-coa Mutase Deficiency	macrophage	-1.24021	1	0.993	0.993	0	0
251000	Methylmalonic Aciduria Due To Methylmalonyl-coa Mutase Deficiency	memory b cell	-0.00101177	1	0.661	0.993	0	0
251000	Methylmalonic Aciduria Due To Methylmalonyl-coa Mutase Deficiency	monocyte	-0.52265	1	0.951	0.993	0	0
251000	Methylmalonic Aciduria Due To Methylmalonyl-coa Mutase Deficiency	myeloid progenitor	0.753014	1	0.2	0.457143	0	0
251000	Methylmalonic Aciduria Due To Methylmalonyl-coa Mutase Deficiency	naive b cell	0.526913	1	0.139	0.457143	0	0
251000	Methylmalonic Aciduria Due To Methylmalonyl-coa Mutase Deficiency	nampt neutrophil	-0.792867	1	0.737	0.993	0	0
251000	Methylmalonic Aciduria Due To Methylmalonyl-coa Mutase Deficiency	neutrophil	2.16885	1	0.032	0.457143	0	0
251000	Methylmalonic Aciduria Due To Methylmalonyl-coa Mutase Deficiency	nk cell	-0.720908	1	0.989	0.993	0	0
251000	Methylmalonic Aciduria Due To Methylmalonyl-coa Mutase Deficiency	plasma cell	-1.09225	1	0.856	0.993	0	0
251110	Methylmalonic Aciduria, Cblb Type	cd4-positive, alpha-beta t cell	-0.129538	1	0.733	0.875	0	0
251110	Methylmalonic Aciduria, Cblb Type	cd8-positive, alpha-beta t cell	-0.266887	1	0.82	0.875	0	0
251110	Methylmalonic Aciduria, Cblb Type	cd24 neutrophil	-0.94767	1	0.875	0.875	0	0
251110	Methylmalonic Aciduria, Cblb Type	erythrocyte	-1.06049	1	0.767	0.875	0	0
251110	Methylmalonic Aciduria, Cblb Type	erythroid progenitor	2.07516	1	0.028	0.352	0	0
251110	Methylmalonic Aciduria, Cblb Type	granulocyte	1.33538	1	0.045	0.352	0	0
251110	Methylmalonic Aciduria, Cblb Type	hematopoietic stem cell	1.19892	1	0.066	0.352	0	0
251110	Methylmalonic Aciduria, Cblb Type	macrophage	-0.318131	1	0.725	0.875	0	0
251110	Methylmalonic Aciduria, Cblb Type	memory b cell	0.185633	1	0.177	0.5664	0	0
251110	Methylmalonic Aciduria, Cblb Type	monocyte	-0.172075	1	0.742	0.875	0	0
251110	Methylmalonic Aciduria, Cblb Type	myeloid progenitor	1.23981	1	0.1	0.4	0	0
251110	Methylmalonic Aciduria, Cblb Type	naive b cell	-0.538583	1	0.838	0.875	0	0
251110	Methylmalonic Aciduria, Cblb Type	nampt neutrophil	-1.19604	1	0.871	0.875	0	0
251110	Methylmalonic Aciduria, Cblb Type	neutrophil	-1.19604	1	0.869	0.875	0	0
251110	Methylmalonic Aciduria, Cblb Type	nk cell	0.388687	1	0.267	0.712	0	0
251110	Methylmalonic Aciduria, Cblb Type	plasma cell	-0.598127	1	0.646	0.875	0	0
251260	Nijmegen Breakage Syndrome	cd4-positive, alpha-beta t cell	-0.420523	1	0.847	0.928	0	0
251260	Nijmegen Breakage Syndrome	cd8-positive, alpha-beta t cell	-0.194018	1	0.784	0.928	0	0
251260	Nijmegen Breakage Syndrome	cd24 neutrophil	1.95247	1	0.04	0.32	0	0
251260	Nijmegen Breakage Syndrome	erythrocyte	-1.36802	1	0.869	0.928	0	0
251260	Nijmegen Breakage Syndrome	erythroid progenitor	-0.24338	1	0.722	0.928	0	0
251260	Nijmegen Breakage Syndrome	granulocyte	-0.282564	1	0.82	0.928	0	0
251260	Nijmegen Breakage Syndrome	hematopoietic stem cell	-0.443877	1	0.87	0.928	0	0
251260	Nijmegen Breakage Syndrome	macrophage	-0.92683	1	0.967	0.967	0	0
251260	Nijmegen Breakage Syndrome	memory b cell	-0.392524	1	0.798	0.928	0	0
251260	Nijmegen Breakage Syndrome	monocyte	-0.358139	1	0.868	0.928	0	0
251260	Nijmegen Breakage Syndrome	myeloid progenitor	0.17185	1	0.269	0.928	0	0
251260	Nijmegen Breakage Syndrome	naive b cell	-0.150298	1	0.682	0.928	0	0
251260	Nijmegen Breakage Syndrome	nampt neutrophil	1.22842	1	0.084	0.448	0	0
251260	Nijmegen Breakage Syndrome	neutrophil	2.30649	1	0.015	0.24	0	0
251260	Nijmegen Breakage Syndrome	nk cell	-0.0170126	1	0.801	0.928	0	0
251260	Nijmegen Breakage Syndrome	plasma cell	-0.86205	1	0.761	0.928	0	0
PS251290	Pseudo-TORCH syndrome	cd4-positive, alpha-beta t cell	-0.112968	1	0.701	0.977067	0	0
PS251290	Pseudo-TORCH syndrome	cd8-positive, alpha-beta t cell	-0.0861067	1	0.782	0.977067	0	0
PS251290	Pseudo-TORCH syndrome	cd24 neutrophil	-0.333537	1	0.678	0.977067	0	0
PS251290	Pseudo-TORCH syndrome	erythrocyte	-1.29134	1	0.825	0.977067	0	0
PS251290	Pseudo-TORCH syndrome	erythroid progenitor	-1.00819	1	0.98	0.98	0	0
PS251290	Pseudo-TORCH syndrome	granulocyte	0.948316	1	0.087	0.348	0	0
PS251290	Pseudo-TORCH syndrome	hematopoietic stem cell	-0.156701	1	0.739	0.977067	0	0
PS251290	Pseudo-TORCH syndrome	macrophage	1.21767	1	0.05	0.266667	0	0
PS251290	Pseudo-TORCH syndrome	memory b cell	-0.083914	1	0.669	0.977067	0	0
PS251290	Pseudo-TORCH syndrome	monocyte	1.49523	1	0.027	0.266667	0	0
PS251290	Pseudo-TORCH syndrome	myeloid progenitor	-0.605901	1	0.916	0.977067	0	0
PS251290	Pseudo-TORCH syndrome	naive b cell	1.84815	1	0.034	0.266667	0	0
PS251290	Pseudo-TORCH syndrome	nampt neutrophil	-1.1332	1	0.846	0.977067	0	0
PS251290	Pseudo-TORCH syndrome	neutrophil	-1.25214	1	0.887	0.977067	0	0
PS251290	Pseudo-TORCH syndrome	nk cell	0.888321	1	0.215	0.688	0	0
PS251290	Pseudo-TORCH syndrome	plasma cell	-0.333696	1	0.502	0.977067	0	0
PS252270	Monosomy 7 myelodysplasia and leukemia syndrome	cd4-positive, alpha-beta t cell	-0.165094	2	0.71	0.999	0	0
PS252270	Monosomy 7 myelodysplasia and leukemia syndrome	cd8-positive, alpha-beta t cell	0.701664	2	0.143	0.411429	0	0
PS252270	Monosomy 7 myelodysplasia and leukemia syndrome	cd24 neutrophil	1.88654	2	0.007	0.112	0	0
PS252270	Monosomy 7 myelodysplasia and leukemia syndrome	erythrocyte	0.0173089	2	0.111	0.411429	0	0
PS252270	Monosomy 7 myelodysplasia and leukemia syndrome	erythroid progenitor	-0.959153	2	0.999	0.999	0	0
PS252270	Monosomy 7 myelodysplasia and leukemia syndrome	granulocyte	-0.723451	2	0.997	0.999	0	0
PS252270	Monosomy 7 myelodysplasia and leukemia syndrome	hematopoietic stem cell	-0.374478	2	0.938	0.999	0	0
PS252270	Monosomy 7 myelodysplasia and leukemia syndrome	macrophage	-0.863941	2	0.992	0.999	0	0
PS252270	Monosomy 7 myelodysplasia and leukemia syndrome	memory b cell	-0.265189	2	0.811	0.999	0	0
PS252270	Monosomy 7 myelodysplasia and leukemia syndrome	monocyte	-0.462817	2	0.98	0.999	0	0
PS252270	Monosomy 7 myelodysplasia and leukemia syndrome	myeloid progenitor	-0.548494	2	0.962	0.999	0	0
PS252270	Monosomy 7 myelodysplasia and leukemia syndrome	naive b cell	0.535279	2	0.156	0.411429	0	0
PS252270	Monosomy 7 myelodysplasia and leukemia syndrome	nampt neutrophil	0.282996	2	0.18	0.411429	0	0
PS252270	Monosomy 7 myelodysplasia and leukemia syndrome	neutrophil	0.53451	2	0.169	0.411429	0	0
[truncated: 3,010 more rows]

## Sheet: Lung
Supplementary File 2C. Diseases and their PrEDiCT scores across cell types in lung.
Disease\Phenotypic series accession (OMIM)	Disease name (OMIM)	Cell type name	PrEDiCT score	Number of causal genes	P value	FDR	Cell type likely affected by disease (1=Yes, 0=No)	Literature co-appearance (1=Yes, 0=No)	Expert curation (1=Affected, 0=Unaffected, NA=Undetermined)
102700	Severe Combined Immunodeficiency, Autosomal Recessive, T Cell-negative,b Cell-negative, Nk Cell-negative, Due To Adenosine Deaminase Deficiency	cd8-positive, alpha-beta t cell	0.495774	1	0.2	0.823333	0	0
102700	Severe Combined Immunodeficiency, Autosomal Recessive, T Cell-negative,b Cell-negative, Nk Cell-negative, Due To Adenosine Deaminase Deficiency	cd4-positive, alpha-beta t cell	0.0284689	1	0.272	0.823333	0	0
102700	Severe Combined Immunodeficiency, Autosomal Recessive, T Cell-negative,b Cell-negative, Nk Cell-negative, Due To Adenosine Deaminase Deficiency	adventitial cell	-0.0439179	1	0.43	0.823333	0	0
102700	Severe Combined Immunodeficiency, Autosomal Recessive, T Cell-negative,b Cell-negative, Nk Cell-negative, Due To Adenosine Deaminase Deficiency	alveolar fibroblast	-0.281894	1	0.697	0.823333	0	0
102700	Severe Combined Immunodeficiency, Autosomal Recessive, T Cell-negative,b Cell-negative, Nk Cell-negative, Due To Adenosine Deaminase Deficiency	b cell	0.650881	1	0.097	0.823333	0	0
102700	Severe Combined Immunodeficiency, Autosomal Recessive, T Cell-negative,b Cell-negative, Nk Cell-negative, Due To Adenosine Deaminase Deficiency	basal cell	-0.328462	1	0.825	0.825	0	0
102700	Severe Combined Immunodeficiency, Autosomal Recessive, T Cell-negative,b Cell-negative, Nk Cell-negative, Due To Adenosine Deaminase Deficiency	basophil	-0.360446	1	0.631	0.823333	0	0
102700	Severe Combined Immunodeficiency, Autosomal Recessive, T Cell-negative,b Cell-negative, Nk Cell-negative, Due To Adenosine Deaminase Deficiency	bronchial smooth muscle cell	-0.212789	1	0.556	0.823333	0	0
102700	Severe Combined Immunodeficiency, Autosomal Recessive, T Cell-negative,b Cell-negative, Nk Cell-negative, Due To Adenosine Deaminase Deficiency	bronchial vessel endothelial cell	0.0355621	1	0.314	0.823333	0	0
102700	Severe Combined Immunodeficiency, Autosomal Recessive, T Cell-negative,b Cell-negative, Nk Cell-negative, Due To Adenosine Deaminase Deficiency	capillary aerocyte	-0.256097	1	0.688	0.823333	0	0
102700	Severe Combined Immunodeficiency, Autosomal Recessive, T Cell-negative,b Cell-negative, Nk Cell-negative, Due To Adenosine Deaminase Deficiency	capillary endothelial cell	-0.27395	1	0.709	0.823333	0	0
102700	Severe Combined Immunodeficiency, Autosomal Recessive, T Cell-negative,b Cell-negative, Nk Cell-negative, Due To Adenosine Deaminase Deficiency	classical monocyte	-0.147214	1	0.416	0.823333	0	0
102700	Severe Combined Immunodeficiency, Autosomal Recessive, T Cell-negative,b Cell-negative, Nk Cell-negative, Due To Adenosine Deaminase Deficiency	club cell	-0.348964	1	0.78	0.823333	0	0
102700	Severe Combined Immunodeficiency, Autosomal Recessive, T Cell-negative,b Cell-negative, Nk Cell-negative, Due To Adenosine Deaminase Deficiency	dendritic cell	-0.177026	1	0.395	0.823333	0	0
102700	Severe Combined Immunodeficiency, Autosomal Recessive, T Cell-negative,b Cell-negative, Nk Cell-negative, Due To Adenosine Deaminase Deficiency	endothelial cell of artery	-0.382667	1	0.756	0.823333	0	0
102700	Severe Combined Immunodeficiency, Autosomal Recessive, T Cell-negative,b Cell-negative, Nk Cell-negative, Due To Adenosine Deaminase Deficiency	endothelial cell of lymphatic vessel	-0.382667	1	0.726	0.823333	0	0
102700	Severe Combined Immunodeficiency, Autosomal Recessive, T Cell-negative,b Cell-negative, Nk Cell-negative, Due To Adenosine Deaminase Deficiency	fibroblast	-0.382667	1	0.673	0.823333	0	0
102700	Severe Combined Immunodeficiency, Autosomal Recessive, T Cell-negative,b Cell-negative, Nk Cell-negative, Due To Adenosine Deaminase Deficiency	intermediate monocyte	0.0568317	1	0.235	0.823333	0	0
102700	Severe Combined Immunodeficiency, Autosomal Recessive, T Cell-negative,b Cell-negative, Nk Cell-negative, Due To Adenosine Deaminase Deficiency	lung ciliated cell	-0.370602	1	0.77	0.823333	0	0
102700	Severe Combined Immunodeficiency, Autosomal Recessive, T Cell-negative,b Cell-negative, Nk Cell-negative, Due To Adenosine Deaminase Deficiency	lung microvascular endothelial cell	-0.194173	1	0.537	0.823333	0	0
102700	Severe Combined Immunodeficiency, Autosomal Recessive, T Cell-negative,b Cell-negative, Nk Cell-negative, Due To Adenosine Deaminase Deficiency	macrophage	-0.227871	1	0.428	0.823333	0	0
102700	Severe Combined Immunodeficiency, Autosomal Recessive, T Cell-negative,b Cell-negative, Nk Cell-negative, Due To Adenosine Deaminase Deficiency	mesothelial cell	-0.261194	1	0.514	0.823333	0	0
102700	Severe Combined Immunodeficiency, Autosomal Recessive, T Cell-negative,b Cell-negative, Nk Cell-negative, Due To Adenosine Deaminase Deficiency	myofibroblast cell	-0.176068	1	0.549	0.823333	0	0
102700	Severe Combined Immunodeficiency, Autosomal Recessive, T Cell-negative,b Cell-negative, Nk Cell-negative, Due To Adenosine Deaminase Deficiency	neutrophil	-0.307969	1	0.423	0.823333	0	0
102700	Severe Combined Immunodeficiency, Autosomal Recessive, T Cell-negative,b Cell-negative, Nk Cell-negative, Due To Adenosine Deaminase Deficiency	nk cell	0.807031	1	0.218	0.823333	0	0
102700	Severe Combined Immunodeficiency, Autosomal Recessive, T Cell-negative,b Cell-negative, Nk Cell-negative, Due To Adenosine Deaminase Deficiency	non-classical monocyte	0.658457	1	0.128	0.823333	0	0
102700	Severe Combined Immunodeficiency, Autosomal Recessive, T Cell-negative,b Cell-negative, Nk Cell-negative, Due To Adenosine Deaminase Deficiency	pericyte cell	-0.327095	1	0.807	0.825	0	0
102700	Severe Combined Immunodeficiency, Autosomal Recessive, T Cell-negative,b Cell-negative, Nk Cell-negative, Due To Adenosine Deaminase Deficiency	plasma cell	-0.111876	1	0.174	0.823333	0	0
102700	Severe Combined Immunodeficiency, Autosomal Recessive, T Cell-negative,b Cell-negative, Nk Cell-negative, Due To Adenosine Deaminase Deficiency	plasmacytoid dendritic cell	5.71131	1	0.007	0.266	0	0
102700	Severe Combined Immunodeficiency, Autosomal Recessive, T Cell-negative,b Cell-negative, Nk Cell-negative, Due To Adenosine Deaminase Deficiency	pulmonary ionocyte	-0.382667	1	0.735	0.823333	0	0
102700	Severe Combined Immunodeficiency, Autosomal Recessive, T Cell-negative,b Cell-negative, Nk Cell-negative, Due To Adenosine Deaminase Deficiency	respiratory goblet cell	-0.340779	1	0.603	0.823333	0	0
102700	Severe Combined Immunodeficiency, Autosomal Recessive, T Cell-negative,b Cell-negative, Nk Cell-negative, Due To Adenosine Deaminase Deficiency	respiratory mucous cell	-0.382667	1	0.489	0.823333	0	0
102700	Severe Combined Immunodeficiency, Autosomal Recessive, T Cell-negative,b Cell-negative, Nk Cell-negative, Due To Adenosine Deaminase Deficiency	serous cell of epithelium of bronchus	-0.304496	1	0.429	0.823333	0	0
102700	Severe Combined Immunodeficiency, Autosomal Recessive, T Cell-negative,b Cell-negative, Nk Cell-negative, Due To Adenosine Deaminase Deficiency	smooth muscle cell	-0.192325	1	0.509	0.823333	0	0
102700	Severe Combined Immunodeficiency, Autosomal Recessive, T Cell-negative,b Cell-negative, Nk Cell-negative, Due To Adenosine Deaminase Deficiency	type i pneumocyte	-0.368594	1	0.777	0.823333	0	0
102700	Severe Combined Immunodeficiency, Autosomal Recessive, T Cell-negative,b Cell-negative, Nk Cell-negative, Due To Adenosine Deaminase Deficiency	type ii pneumocyte	-0.361713	1	0.691	0.823333	0	0
102700	Severe Combined Immunodeficiency, Autosomal Recessive, T Cell-negative,b Cell-negative, Nk Cell-negative, Due To Adenosine Deaminase Deficiency	vascular associated smooth muscle cell	-0.246847	1	0.627	0.823333	0	0
102700	Severe Combined Immunodeficiency, Autosomal Recessive, T Cell-negative,b Cell-negative, Nk Cell-negative, Due To Adenosine Deaminase Deficiency	vein endothelial cell	-0.308619	1	0.758	0.823333	0	0
PS122470	Cornelia de Lange syndrome	cd8-positive, alpha-beta t cell	0.326496	1	0.254	0.646	0	0
PS122470	Cornelia de Lange syndrome	cd4-positive, alpha-beta t cell	0.35725	1	0.16	0.552727	0	0
PS122470	Cornelia de Lange syndrome	adventitial cell	-1.13394	1	0.98	0.997	0	0
PS122470	Cornelia de Lange syndrome	alveolar fibroblast	-0.509486	1	0.865	0.997	0	0
PS122470	Cornelia de Lange syndrome	b cell	-0.258441	1	0.485	0.97	0	0
PS122470	Cornelia de Lange syndrome	basal cell	-0.190571	1	0.672	0.997	0	0
PS122470	Cornelia de Lange syndrome	basophil	-1.02456	1	0.98	0.997	0	0
PS122470	Cornelia de Lange syndrome	bronchial smooth muscle cell	-0.481517	1	0.79	0.997	0	0
PS122470	Cornelia de Lange syndrome	bronchial vessel endothelial cell	-0.301597	1	0.609	0.997	0	0
PS122470	Cornelia de Lange syndrome	capillary aerocyte	0.614042	1	0.18	0.57	0	0
PS122470	Cornelia de Lange syndrome	capillary endothelial cell	1.41216	1	0.077	0.552727	0	0
PS122470	Cornelia de Lange syndrome	classical monocyte	0.938901	1	0.091	0.552727	0	0
PS122470	Cornelia de Lange syndrome	club cell	0.368964	1	0.149	0.552727	0	0
PS122470	Cornelia de Lange syndrome	dendritic cell	-0.706587	1	0.852	0.997	0	0
PS122470	Cornelia de Lange syndrome	endothelial cell of artery	0.876184	1	0.12	0.552727	0	0
PS122470	Cornelia de Lange syndrome	endothelial cell of lymphatic vessel	0.136054	1	0.327	0.730941	0	0
PS122470	Cornelia de Lange syndrome	fibroblast	1.66309	1	0.141	0.552727	0	0
PS122470	Cornelia de Lange syndrome	intermediate monocyte	1.30379	1	0.061	0.552727	0	0
PS122470	Cornelia de Lange syndrome	lung ciliated cell	-0.00612814	1	0.477	0.97	0	0
PS122470	Cornelia de Lange syndrome	lung microvascular endothelial cell	-0.774531	1	0.969	0.997	0	0
PS122470	Cornelia de Lange syndrome	macrophage	-0.881782	1	0.948	0.997	0	0
PS122470	Cornelia de Lange syndrome	mesothelial cell	-0.498908	1	0.719	0.997	0	0
PS122470	Cornelia de Lange syndrome	myofibroblast cell	-0.183058	1	0.538	0.973524	0	0
PS122470	Cornelia de Lange syndrome	neutrophil	2.44445	1	0.049	0.552727	0	0
PS122470	Cornelia de Lange syndrome	nk cell	0.720278	1	0.255	0.646	0	0
PS122470	Cornelia de Lange syndrome	non-classical monocyte	1.05792	1	0.071	0.552727	0	0
PS122470	Cornelia de Lange syndrome	pericyte cell	1.13225	1	0.117	0.552727	0	0
PS122470	Cornelia de Lange syndrome	plasma cell	-2.13018	1	0.997	0.997	0	0
PS122470	Cornelia de Lange syndrome	plasmacytoid dendritic cell	1.26421	1	0.119	0.552727	0	0
PS122470	Cornelia de Lange syndrome	pulmonary ionocyte	0.648176	1	0.28	0.665	0	0
PS122470	Cornelia de Lange syndrome	respiratory goblet cell	-0.932732	1	0.962	0.997	0	0
PS122470	Cornelia de Lange syndrome	respiratory mucous cell	-1.44751	1	0.947	0.997	0	0
PS122470	Cornelia de Lange syndrome	serous cell of epithelium of bronchus	-1.41495	1	0.942	0.997	0	0
PS122470	Cornelia de Lange syndrome	smooth muscle cell	-1.2364	1	0.944	0.997	0	0
PS122470	Cornelia de Lange syndrome	type i pneumocyte	-0.0147553	1	0.518	0.973524	0	0
PS122470	Cornelia de Lange syndrome	type ii pneumocyte	-0.720054	1	0.932	0.997	0	0
PS122470	Cornelia de Lange syndrome	vascular associated smooth muscle cell	-0.650932	1	0.885	0.997	0	0
PS122470	Cornelia de Lange syndrome	vein endothelial cell	0.234408	1	0.243	0.646	0	0
PS123700	Cutis laxa	cd8-positive, alpha-beta t cell	-0.377544	5	0.899	0.978	0	0
PS123700	Cutis laxa	cd4-positive, alpha-beta t cell	-0.45339	5	0.91	0.978	0	0
PS123700	Cutis laxa	adventitial cell	2.07697	5	0.001	0.0126667	1	0
PS123700	Cutis laxa	alveolar fibroblast	3.2424	5	0	0	1	0
PS123700	Cutis laxa	b cell	-0.52091	5	0.817	0.978	0	0
PS123700	Cutis laxa	basal cell	-0.296295	5	0.921	0.978	0	0
PS123700	Cutis laxa	basophil	-0.453371	5	0.876	0.978	0	0
PS123700	Cutis laxa	bronchial smooth muscle cell	1.31783	5	0	0	1	0
PS123700	Cutis laxa	bronchial vessel endothelial cell	-0.438441	5	0.89	0.978	0	0
PS123700	Cutis laxa	capillary aerocyte	-0.384285	5	0.919	0.978	0	0
PS123700	Cutis laxa	capillary endothelial cell	-0.358384	5	0.947	0.978	0	0
PS123700	Cutis laxa	classical monocyte	-0.45386	5	0.885	0.978	0	0
PS123700	Cutis laxa	club cell	-0.455149	5	0.968	0.978	0	0
PS123700	Cutis laxa	dendritic cell	-0.458427	5	0.823	0.978	0	0
PS123700	Cutis laxa	endothelial cell of artery	0.450308	5	0.071	0.462333	0	0
PS123700	Cutis laxa	endothelial cell of lymphatic vessel	0.164181	5	0.176	0.7334	0	0
PS123700	Cutis laxa	fibroblast	0.697594	5	0.108	0.586286	0	0
PS123700	Cutis laxa	intermediate monocyte	-0.446824	5	0.868	0.978	0	0
PS123700	Cutis laxa	lung ciliated cell	-0.528871	5	0.978	0.978	0	0
PS123700	Cutis laxa	lung microvascular endothelial cell	-0.498026	5	0.975	0.978	0	0
PS123700	Cutis laxa	macrophage	-0.456714	5	0.795	0.978	0	0
PS123700	Cutis laxa	mesothelial cell	-0.351333	5	0.694	0.978	0	0
PS123700	Cutis laxa	myofibroblast cell	0.330983	5	0.145	0.68875	0	0
PS123700	Cutis laxa	neutrophil	-0.428395	5	0.518	0.978	0	0
PS123700	Cutis laxa	nk cell	-0.499707	5	0.96	0.978	0	0
PS123700	Cutis laxa	non-classical monocyte	-0.45489	5	0.933	0.978	0	0
PS123700	Cutis laxa	pericyte cell	-0.346158	5	0.943	0.978	0	0
PS123700	Cutis laxa	plasma cell	-0.527851	5	0.459	0.978	0	0
PS123700	Cutis laxa	plasmacytoid dendritic cell	-0.458427	5	0.727	0.978	0	0
PS123700	Cutis laxa	pulmonary ionocyte	-0.451813	5	0.907	0.978	0	0
PS123700	Cutis laxa	respiratory goblet cell	-0.475284	5	0.866	0.978	0	0
PS123700	Cutis laxa	respiratory mucous cell	-0.501835	5	0.643	0.978	0	0
PS123700	Cutis laxa	serous cell of epithelium of bronchus	-0.588621	5	0.732	0.978	0	0
PS123700	Cutis laxa	smooth muscle cell	0.319121	5	0.073	0.462333	0	0
PS123700	Cutis laxa	type i pneumocyte	0.203125	5	0.193	0.7334	0	0
PS123700	Cutis laxa	type ii pneumocyte	-0.451997	5	0.91	0.978	0	0
PS123700	Cutis laxa	vascular associated smooth muscle cell	1.30531	5	0.003	0.0285	1	0
PS123700	Cutis laxa	vein endothelial cell	-0.125662	5	0.556	0.978	0	0
PS127550	Dyskeratosis congenita	cd8-positive, alpha-beta t cell	0.442841	3	0.112	0.4408	0	0
PS127550	Dyskeratosis congenita	cd4-positive, alpha-beta t cell	-0.330227	3	0.739	0.999	0	0
PS127550	Dyskeratosis congenita	adventitial cell	0.291464	3	0.116	0.4408	0	0
PS127550	Dyskeratosis congenita	alveolar fibroblast	-0.804798	3	0.999	0.999	0	0
PS127550	Dyskeratosis congenita	b cell	0.161614	3	0.084	0.4408	0	0
PS127550	Dyskeratosis congenita	basal cell	-0.587406	3	0.999	0.999	0	0
PS127550	Dyskeratosis congenita	basophil	0.883578	3	0.01	0.38	0	0
PS127550	Dyskeratosis congenita	bronchial smooth muscle cell	-0.031674	3	0.423	0.945529	0	0
PS127550	Dyskeratosis congenita	bronchial vessel endothelial cell	0.546305	3	0.078	0.4408	0	0
PS127550	Dyskeratosis congenita	capillary aerocyte	-0.0709026	3	0.499	0.998	0	0
PS127550	Dyskeratosis congenita	capillary endothelial cell	-0.331463	3	0.862	0.999	0	0
PS127550	Dyskeratosis congenita	classical monocyte	-0.365852	3	0.715	0.999	0	0
PS127550	Dyskeratosis congenita	club cell	-0.64838	3	0.997	0.999	0	0
PS127550	Dyskeratosis congenita	dendritic cell	0.110265	3	0.069	0.4408	0	0
PS127550	Dyskeratosis congenita	endothelial cell of artery	0.185738	3	0.225	0.534375	0	0
PS127550	Dyskeratosis congenita	endothelial cell of lymphatic vessel	-0.0858831	3	0.472	0.996444	0	0
PS127550	Dyskeratosis congenita	fibroblast	-0.366482	3	0.732	0.999	0	0
PS127550	Dyskeratosis congenita	intermediate monocyte	-0.24309	3	0.531	0.999	0	0
PS127550	Dyskeratosis congenita	lung ciliated cell	-0.634283	3	0.976	0.999	0	0
PS127550	Dyskeratosis congenita	lung microvascular endothelial cell	0.346968	3	0.058	0.4408	0	0
PS127550	Dyskeratosis congenita	macrophage	-0.562494	3	0.855	0.999	0	0
PS127550	Dyskeratosis congenita	mesothelial cell	-0.637843	3	0.893	0.999	0	0
PS127550	Dyskeratosis congenita	myofibroblast cell	-0.361131	3	0.724	0.999	0	0
PS127550	Dyskeratosis congenita	neutrophil	0.103142	3	0.071	0.4408	0	0
PS127550	Dyskeratosis congenita	nk cell	0.495457	3	0.178	0.529077	0	0
PS127550	Dyskeratosis congenita	non-classical monocyte	0.0364273	3	0.201	0.534375	0	0
PS127550	Dyskeratosis congenita	pericyte cell	-0.502274	3	0.974	0.999	0	0
PS127550	Dyskeratosis congenita	plasma cell	-0.945384	3	0.786	0.999	0	0
PS127550	Dyskeratosis congenita	plasmacytoid dendritic cell	0.450414	3	0.103	0.4408	0	0
PS127550	Dyskeratosis congenita	pulmonary ionocyte	0.446649	3	0.216	0.534375	0	0
PS127550	Dyskeratosis congenita	respiratory goblet cell	-0.758168	3	0.986	0.999	0	0
PS127550	Dyskeratosis congenita	respiratory mucous cell	-1.2657	3	0.968	0.999	0	0
PS127550	Dyskeratosis congenita	serous cell of epithelium of bronchus	-1.12914	3	0.952	0.999	0	0
PS127550	Dyskeratosis congenita	smooth muscle cell	0.4982	3	0.093	0.4408	0	0
PS127550	Dyskeratosis congenita	type i pneumocyte	-0.207116	3	0.709	0.999	0	0
PS127550	Dyskeratosis congenita	type ii pneumocyte	-0.34393	3	0.728	0.999	0	0
PS127550	Dyskeratosis congenita	vascular associated smooth muscle cell	0.188651	3	0.181	0.529077	0	0
PS127550	Dyskeratosis congenita	vein endothelial cell	0.22879	3	0.136	0.469818	0	0
PS130000	Ehlers-Danlos syndrome	cd8-positive, alpha-beta t cell	-0.41969	4	0.923	0.992	0	0
PS130000	Ehlers-Danlos syndrome	cd4-positive, alpha-beta t cell	-0.562832	4	0.965	0.992	0	0
PS130000	Ehlers-Danlos syndrome	adventitial cell	1.24915	4	0.005	0.0475	1	0
PS130000	Ehlers-Danlos syndrome	alveolar fibroblast	1.51301	4	0.002	0.0475	1	0
PS130000	Ehlers-Danlos syndrome	b cell	-0.509008	4	0.818	0.992	0	0
PS130000	Ehlers-Danlos syndrome	basal cell	-0.327294	4	0.942	0.992	0	0
PS130000	Ehlers-Danlos syndrome	basophil	-0.61671	4	0.976	0.992	0	0
PS130000	Ehlers-Danlos syndrome	bronchial smooth muscle cell	0.216869	4	0.145	0.7505	0	0
PS130000	Ehlers-Danlos syndrome	bronchial vessel endothelial cell	0.0107648	4	0.27	0.992	0	0
PS130000	Ehlers-Danlos syndrome	capillary aerocyte	-0.170544	4	0.695	0.992	0	0
PS130000	Ehlers-Danlos syndrome	capillary endothelial cell	-0.0168444	4	0.485	0.992	0	0
PS130000	Ehlers-Danlos syndrome	classical monocyte	0.0214441	4	0.158	0.7505	0	0
PS130000	Ehlers-Danlos syndrome	club cell	-0.528254	4	0.992	0.992	0	0
PS130000	Ehlers-Danlos syndrome	dendritic cell	-0.417431	4	0.74	0.992	0	0
PS130000	Ehlers-Danlos syndrome	endothelial cell of artery	0.013064	4	0.36	0.992	0	0
PS130000	Ehlers-Danlos syndrome	endothelial cell of lymphatic vessel	-0.422275	4	0.863	0.992	0	0
PS130000	Ehlers-Danlos syndrome	fibroblast	1.58934	4	0.025	0.19	0	0
PS130000	Ehlers-Danlos syndrome	intermediate monocyte	-0.0783287	4	0.314	0.992	0	0
PS130000	Ehlers-Danlos syndrome	lung ciliated cell	-0.527424	4	0.985	0.992	0	0
PS130000	Ehlers-Danlos syndrome	lung microvascular endothelial cell	-0.252703	4	0.68	0.992	0	0
PS130000	Ehlers-Danlos syndrome	macrophage	-0.391737	4	0.667	0.992	0	0
PS130000	Ehlers-Danlos syndrome	mesothelial cell	-0.253145	4	0.536	0.992	0	0
PS130000	Ehlers-Danlos syndrome	myofibroblast cell	-0.272227	4	0.665	0.992	0	0
PS130000	Ehlers-Danlos syndrome	neutrophil	-0.512305	4	0.599	0.992	0	0
PS130000	Ehlers-Danlos syndrome	nk cell	-0.283585	4	0.799	0.992	0	0
PS130000	Ehlers-Danlos syndrome	non-classical monocyte	-0.102834	4	0.411	0.992	0	0
PS130000	Ehlers-Danlos syndrome	pericyte cell	1.79997	4	0.003	0.0475	1	0
PS130000	Ehlers-Danlos syndrome	plasma cell	-0.562743	4	0.436	0.992	0	0
PS130000	Ehlers-Danlos syndrome	plasmacytoid dendritic cell	-0.512305	4	0.74	0.992	0	0
PS130000	Ehlers-Danlos syndrome	pulmonary ionocyte	-0.446063	4	0.906	0.992	0	0
PS130000	Ehlers-Danlos syndrome	respiratory goblet cell	-0.557563	4	0.943	0.992	0	0
PS130000	Ehlers-Danlos syndrome	respiratory mucous cell	-0.584654	4	0.703	0.992	0	0
PS130000	Ehlers-Danlos syndrome	serous cell of epithelium of bronchus	-0.451548	4	0.55	0.992	0	0
PS130000	Ehlers-Danlos syndrome	smooth muscle cell	0.447638	4	0.072	0.456	0	0
PS130000	Ehlers-Danlos syndrome	type i pneumocyte	-0.376802	4	0.942	0.992	0	0
PS130000	Ehlers-Danlos syndrome	type ii pneumocyte	-0.489644	4	0.938	0.992	0	0
PS130000	Ehlers-Danlos syndrome	vascular associated smooth muscle cell	1.10994	4	0.005	0.0475	1	0
PS130000	Ehlers-Danlos syndrome	vein endothelial cell	-0.151586	4	0.641	0.992	0	0
135150	Birt-hogg-dube Syndrome	cd8-positive, alpha-beta t cell	-0.703876	1	0.942	0.954	0	0
135150	Birt-hogg-dube Syndrome	cd4-positive, alpha-beta t cell	-0.389112	1	0.703	0.954	0	0
135150	Birt-hogg-dube Syndrome	adventitial cell	1.07715	1	0.084	0.6384	0	0
135150	Birt-hogg-dube Syndrome	alveolar fibroblast	1.0869	1	0.083	0.6384	0	0
135150	Birt-hogg-dube Syndrome	b cell	-0.530032	1	0.7	0.954	0	0
135150	Birt-hogg-dube Syndrome	basal cell	-0.393637	1	0.871	0.954	0	0
135150	Birt-hogg-dube Syndrome	basophil	-0.187469	1	0.44	0.954	0	0
135150	Birt-hogg-dube Syndrome	bronchial smooth muscle cell	0.18603	1	0.245	0.806769	0	0
135150	Birt-hogg-dube Syndrome	bronchial vessel endothelial cell	-0.725029	1	0.891	0.954	0	0
135150	Birt-hogg-dube Syndrome	capillary aerocyte	-0.217225	1	0.65	0.954	0	0
135150	Birt-hogg-dube Syndrome	capillary endothelial cell	-0.329922	1	0.764	0.954	0	0
135150	Birt-hogg-dube Syndrome	classical monocyte	-0.123393	1	0.424	0.954	0	0
135150	Birt-hogg-dube Syndrome	club cell	0.0985828	1	0.259	0.806769	0	0
135150	Birt-hogg-dube Syndrome	dendritic cell	-0.804063	1	0.895	0.954	0	0
135150	Birt-hogg-dube Syndrome	endothelial cell of artery	-0.480339	1	0.843	0.954	0	0
135150	Birt-hogg-dube Syndrome	endothelial cell of lymphatic vessel	2.33333	1	0.054	0.6384	0	0
135150	Birt-hogg-dube Syndrome	fibroblast	1.79616	1	0.145	0.68875	0	0
135150	Birt-hogg-dube Syndrome	intermediate monocyte	-0.633253	1	0.863	0.954	0	0
135150	Birt-hogg-dube Syndrome	lung ciliated cell	1.22181	1	0.13	0.68875	0	0
135150	Birt-hogg-dube Syndrome	lung microvascular endothelial cell	-0.724888	1	0.954	0.954	0	0
135150	Birt-hogg-dube Syndrome	macrophage	-0.0605381	1	0.307	0.833286	0	0
135150	Birt-hogg-dube Syndrome	mesothelial cell	-0.313578	1	0.543	0.954	0	0
135150	Birt-hogg-dube Syndrome	myofibroblast cell	1.20541	1	0.186	0.7068	0	0
135150	Birt-hogg-dube Syndrome	neutrophil	1.89914	1	0.079	0.6384	0	0
135150	Birt-hogg-dube Syndrome	nk cell	-0.504838	1	0.823	0.954	0	0
135150	Birt-hogg-dube Syndrome	non-classical monocyte	0.373538	1	0.177	0.7068	0	0
135150	Birt-hogg-dube Syndrome	pericyte cell	-0.597929	1	0.927	0.954	0	0
135150	Birt-hogg-dube Syndrome	plasma cell	-1.00228	1	0.713	0.954	0	0
135150	Birt-hogg-dube Syndrome	plasmacytoid dendritic cell	-1.23377	1	0.928	0.954	0	0
135150	Birt-hogg-dube Syndrome	pulmonary ionocyte	0.557959	1	0.276	0.806769	0	0
135150	Birt-hogg-dube Syndrome	respiratory goblet cell	-0.742676	1	0.907	0.954	0	0
135150	Birt-hogg-dube Syndrome	respiratory mucous cell	-1.23377	1	0.86	0.954	0	0
135150	Birt-hogg-dube Syndrome	serous cell of epithelium of bronchus	-1.23377	1	0.919	0.954	0	0
135150	Birt-hogg-dube Syndrome	smooth muscle cell	-1.23377	1	0.944	0.954	0	0
135150	Birt-hogg-dube Syndrome	type i pneumocyte	2.40949	1	0.039	0.6384	0	0
135150	Birt-hogg-dube Syndrome	type ii pneumocyte	-0.126292	1	0.41	0.954	0	0
135150	Birt-hogg-dube Syndrome	vascular associated smooth muscle cell	0.882086	1	0.133	0.68875	0	0
135150	Birt-hogg-dube Syndrome	vein endothelial cell	-0.602154	1	0.953	0.954	0	0
PS135900	Coffin-Siris syndrome	cd8-positive, alpha-beta t cell	0.567257	1	0.179	0.684	0	0
PS135900	Coffin-Siris syndrome	cd4-positive, alpha-beta t cell	0.0794893	1	0.212	0.724375	0	0
PS135900	Coffin-Siris syndrome	adventitial cell	-0.463203	1	0.765	0.984	0	0
PS135900	Coffin-Siris syndrome	alveolar fibroblast	0.794734	1	0.135	0.684	0	0
PS135900	Coffin-Siris syndrome	b cell	0.214395	1	0.173	0.684	0	0
PS135900	Coffin-Siris syndrome	basal cell	0.0930005	1	0.333	0.741	0	0
PS135900	Coffin-Siris syndrome	basophil	0.394346	1	0.12	0.684	0	0
PS135900	Coffin-Siris syndrome	bronchial smooth muscle cell	-0.379511	1	0.719	0.984	0	0
PS135900	Coffin-Siris syndrome	bronchial vessel endothelial cell	-1.21713	1	0.984	0.984	0	0
PS135900	Coffin-Siris syndrome	capillary aerocyte	-0.137636	1	0.522	0.862435	0	0
PS135900	Coffin-Siris syndrome	capillary endothelial cell	0.69947	1	0.172	0.684	0	0
PS135900	Coffin-Siris syndrome	classical monocyte	-0.582027	1	0.836	0.984	0	0
PS135900	Coffin-Siris syndrome	club cell	0.315251	1	0.18	0.684	0	0
PS135900	Coffin-Siris syndrome	dendritic cell	-0.753805	1	0.888	0.984	0	0
PS135900	Coffin-Siris syndrome	endothelial cell of artery	0.07251	1	0.351	0.741	0	0
PS135900	Coffin-Siris syndrome	endothelial cell of lymphatic vessel	1.46015	1	0.102	0.684	0	0
PS135900	Coffin-Siris syndrome	fibroblast	1.93893	1	0.104	0.684	0	0
PS135900	Coffin-Siris syndrome	intermediate monocyte	-0.511867	1	0.79	0.984	0	0
PS135900	Coffin-Siris syndrome	lung ciliated cell	0.180205	1	0.296	0.724375	0	0
PS135900	Coffin-Siris syndrome	lung microvascular endothelial cell	-0.50415	1	0.859	0.984	0	0
PS135900	Coffin-Siris syndrome	macrophage	-0.971312	1	0.964	0.984	0	0
PS135900	Coffin-Siris syndrome	mesothelial cell	-0.463142	1	0.681	0.984	0	0
PS135900	Coffin-Siris syndrome	myofibroblast cell	-0.113042	1	0.464	0.848667	0	0
PS135900	Coffin-Siris syndrome	neutrophil	-1.58773	1	0.9	0.984	0	0
PS135900	Coffin-Siris syndrome	nk cell	0.347259	1	0.305	0.724375	0	0
PS135900	Coffin-Siris syndrome	non-classical monocyte	-0.1203	1	0.451	0.848667	0	0
PS135900	Coffin-Siris syndrome	pericyte cell	2.95429	1	0.02	0.684	0	0
PS135900	Coffin-Siris syndrome	plasma cell	-1.44475	1	0.913	0.984	0	0
PS135900	Coffin-Siris syndrome	plasmacytoid dendritic cell	2.61294	1	0.057	0.684	0	0
PS135900	Coffin-Siris syndrome	pulmonary ionocyte	0.308609	1	0.295	0.724375	0	0
PS135900	Coffin-Siris syndrome	respiratory goblet cell	-0.226025	1	0.469	0.848667	0	0
PS135900	Coffin-Siris syndrome	respiratory mucous cell	-1.39242	1	0.925	0.984	0	0
PS135900	Coffin-Siris syndrome	serous cell of epithelium of bronchus	-0.37726	1	0.511	0.862435	0	0
PS135900	Coffin-Siris syndrome	smooth muscle cell	-1.29565	1	0.95	0.984	0	0
PS135900	Coffin-Siris syndrome	type i pneumocyte	-0.186542	1	0.616	0.975333	0	0
PS135900	Coffin-Siris syndrome	type ii pneumocyte	-0.727902	1	0.937	0.984	0	0
PS135900	Coffin-Siris syndrome	vascular associated smooth muscle cell	0.1912	1	0.271	0.724375	0	0
PS135900	Coffin-Siris syndrome	vein endothelial cell	0.231367	1	0.251	0.724375	0	0
PS156200	Mental retardation, autosomal dominant	cd8-positive, alpha-beta t cell	0.056398	2	0.395	0.8968	0	0
PS156200	Mental retardation, autosomal dominant	cd4-positive, alpha-beta t cell	-0.132606	2	0.455	0.8968	0	0
PS156200	Mental retardation, autosomal dominant	adventitial cell	-0.913636	2	0.982	0.993	0	0
PS156200	Mental retardation, autosomal dominant	alveolar fibroblast	0.174583	2	0.337	0.8968	0	0
PS156200	Mental retardation, autosomal dominant	b cell	-0.351588	2	0.594	0.981391	0	0
PS156200	Mental retardation, autosomal dominant	basal cell	-0.000270251	2	0.507	0.917429	0	0
PS156200	Mental retardation, autosomal dominant	basophil	0.0731512	2	0.228	0.8968	0	0
PS156200	Mental retardation, autosomal dominant	bronchial smooth muscle cell	0.0949274	2	0.34	0.8968	0	0
PS156200	Mental retardation, autosomal dominant	bronchial vessel endothelial cell	-0.757711	2	0.971	0.993	0	0
PS156200	Mental retardation, autosomal dominant	capillary aerocyte	0.126523	2	0.364	0.8968	0	0
PS156200	Mental retardation, autosomal dominant	capillary endothelial cell	0.528343	2	0.189	0.8968	0	0
PS156200	Mental retardation, autosomal dominant	classical monocyte	-0.517246	2	0.866	0.993	0	0
PS156200	Mental retardation, autosomal dominant	club cell	0.309561	2	0.198	0.8968	0	0
PS156200	Mental retardation, autosomal dominant	dendritic cell	-0.905337	2	0.988	0.993	0	0
PS156200	Mental retardation, autosomal dominant	endothelial cell of artery	0.395064	2	0.246	0.8968	0	0
PS156200	Mental retardation, autosomal dominant	endothelial cell of lymphatic vessel	0.630846	2	0.198	0.8968	0	0
PS156200	Mental retardation, autosomal dominant	fibroblast	1.91904	2	0.077	0.8968	0	0
PS156200	Mental retardation, autosomal dominant	intermediate monocyte	-0.369765	2	0.743	0.993	0	0
PS156200	Mental retardation, autosomal dominant	lung ciliated cell	0.0564172	2	0.464	0.8968	0	0
PS156200	Mental retardation, autosomal dominant	lung microvascular endothelial cell	0.0275947	2	0.284	0.8968	0	0
PS156200	Mental retardation, autosomal dominant	macrophage	-0.939408	2	0.993	0.993	0	0
PS156200	Mental retardation, autosomal dominant	mesothelial cell	-0.500443	2	0.767	0.993	0	0
PS156200	Mental retardation, autosomal dominant	myofibroblast cell	1.23966	2	0.141	0.8968	0	0
PS156200	Mental retardation, autosomal dominant	neutrophil	-1.08351	2	0.884	0.993	0	0
PS156200	Mental retardation, autosomal dominant	nk cell	-0.409204	2	0.835	0.993	0	0
PS156200	Mental retardation, autosomal dominant	non-classical monocyte	-0.105508	2	0.472	0.8968	0	0
PS156200	Mental retardation, autosomal dominant	pericyte cell	2.33354	2	0.016	0.361	0	0
PS156200	Mental retardation, autosomal dominant	plasma cell	-1.43843	2	0.963	0.993	0	0
PS156200	Mental retardation, autosomal dominant	plasmacytoid dendritic cell	2.6089	2	0.019	0.361	0	0
PS156200	Mental retardation, autosomal dominant	pulmonary ionocyte	0.664831	2	0.29	0.8968	0	0
PS156200	Mental retardation, autosomal dominant	respiratory goblet cell	-0.441872	2	0.79	0.993	0	0
PS156200	Mental retardation, autosomal dominant	respiratory mucous cell	-1.19862	2	0.948	0.993	0	0
PS156200	Mental retardation, autosomal dominant	serous cell of epithelium of bronchus	-0.845017	2	0.826	0.993	0	0
PS156200	Mental retardation, autosomal dominant	smooth muscle cell	-0.340344	2	0.574	0.981391	0	0
PS156200	Mental retardation, autosomal dominant	type i pneumocyte	0.165191	2	0.423	0.8968	0	0
PS156200	Mental retardation, autosomal dominant	type ii pneumocyte	-0.423179	2	0.828	0.993	0	0
PS156200	Mental retardation, autosomal dominant	vascular associated smooth muscle cell	-0.208176	2	0.65	0.993	0	0
PS156200	Mental retardation, autosomal dominant	vein endothelial cell	0.477296	2	0.138	0.8968	0	0
137940	Hypotrichosis-lymphedema-telangiectasia-renal Defect Syndrome	cd8-positive, alpha-beta t cell	-0.490351	1	0.851	0.886324	0	0
137940	Hypotrichosis-lymphedema-telangiectasia-renal Defect Syndrome	cd4-positive, alpha-beta t cell	-0.500769	1	0.781	0.886324	0	0
137940	Hypotrichosis-lymphedema-telangiectasia-renal Defect Syndrome	adventitial cell	-0.490181	1	0.785	0.886324	0	0
137940	Hypotrichosis-lymphedema-telangiectasia-renal Defect Syndrome	alveolar fibroblast	-0.463992	1	0.84	0.886324	0	0
137940	Hypotrichosis-lymphedema-telangiectasia-renal Defect Syndrome	b cell	-0.410636	1	0.622	0.886324	0	0
137940	Hypotrichosis-lymphedema-telangiectasia-renal Defect Syndrome	basal cell	-0.426412	1	0.888	0.888	0	0
137940	Hypotrichosis-lymphedema-telangiectasia-renal Defect Syndrome	basophil	-0.49645	1	0.752	0.886324	0	0
137940	Hypotrichosis-lymphedema-telangiectasia-renal Defect Syndrome	bronchial smooth muscle cell	-0.343803	1	0.659	0.886324	0	0
137940	Hypotrichosis-lymphedema-telangiectasia-renal Defect Syndrome	bronchial vessel endothelial cell	0.84397	1	0.118	0.747333	0	0
137940	Hypotrichosis-lymphedema-telangiectasia-renal Defect Syndrome	capillary aerocyte	2.38769	1	0.021	0.1995	0	0
137940	Hypotrichosis-lymphedema-telangiectasia-renal Defect Syndrome	capillary endothelial cell	1.55268	1	0.046	0.3496	0	0
137940	Hypotrichosis-lymphedema-telangiectasia-renal Defect Syndrome	classical monocyte	-0.488035	1	0.746	0.886324	0	0
137940	Hypotrichosis-lymphedema-telangiectasia-renal Defect Syndrome	club cell	-0.443034	1	0.842	0.886324	0	0
137940	Hypotrichosis-lymphedema-telangiectasia-renal Defect Syndrome	dendritic cell	-0.496943	1	0.72	0.886324	0	0
137940	Hypotrichosis-lymphedema-telangiectasia-renal Defect Syndrome	endothelial cell of artery	3.44121	1	0.001	0.038	1	0
137940	Hypotrichosis-lymphedema-telangiectasia-renal Defect Syndrome	endothelial cell of lymphatic vessel	1.10884	1	0.145	0.787143	0	0
137940	Hypotrichosis-lymphedema-telangiectasia-renal Defect Syndrome	fibroblast	0.271657	1	0.348	0.886324	0	0
137940	Hypotrichosis-lymphedema-telangiectasia-renal Defect Syndrome	intermediate monocyte	-0.493901	1	0.78	0.886324	0	0
137940	Hypotrichosis-lymphedema-telangiectasia-renal Defect Syndrome	lung ciliated cell	-0.459554	1	0.832	0.886324	0	0
137940	Hypotrichosis-lymphedema-telangiectasia-renal Defect Syndrome	lung microvascular endothelial cell	2.19423	1	0.01	0.126667	0	0
137940	Hypotrichosis-lymphedema-telangiectasia-renal Defect Syndrome	macrophage	-0.494091	1	0.694	0.886324	0	0
137940	Hypotrichosis-lymphedema-telangiectasia-renal Defect Syndrome	mesothelial cell	-0.503562	1	0.702	0.886324	0	0
137940	Hypotrichosis-lymphedema-telangiectasia-renal Defect Syndrome	myofibroblast cell	-0.0969897	1	0.505	0.886324	0	0
137940	Hypotrichosis-lymphedema-telangiectasia-renal Defect Syndrome	neutrophil	-0.503562	1	0.571	0.886324	0	0
137940	Hypotrichosis-lymphedema-telangiectasia-renal Defect Syndrome	nk cell	-0.485338	1	0.801	0.886324	0	0
137940	Hypotrichosis-lymphedema-telangiectasia-renal Defect Syndrome	non-classical monocyte	-0.493196	1	0.838	0.886324	0	0
137940	Hypotrichosis-lymphedema-telangiectasia-renal Defect Syndrome	pericyte cell	-0.309615	1	0.763	0.886324	0	0
137940	Hypotrichosis-lymphedema-telangiectasia-renal Defect Syndrome	plasma cell	-0.469235	1	0.417	0.886324	0	0
137940	Hypotrichosis-lymphedema-telangiectasia-renal Defect Syndrome	plasmacytoid dendritic cell	-0.503562	1	0.649	0.886324	0	0
137940	Hypotrichosis-lymphedema-telangiectasia-renal Defect Syndrome	pulmonary ionocyte	-0.503562	1	0.766	0.886324	0	0
137940	Hypotrichosis-lymphedema-telangiectasia-renal Defect Syndrome	respiratory goblet cell	-0.483592	1	0.739	0.886324	0	0
137940	Hypotrichosis-lymphedema-telangiectasia-renal Defect Syndrome	respiratory mucous cell	-0.503562	1	0.561	0.886324	0	0
137940	Hypotrichosis-lymphedema-telangiectasia-renal Defect Syndrome	serous cell of epithelium of bronchus	-0.503562	1	0.581	0.886324	0	0
137940	Hypotrichosis-lymphedema-telangiectasia-renal Defect Syndrome	smooth muscle cell	-0.496649	1	0.688	0.886324	0	0
137940	Hypotrichosis-lymphedema-telangiectasia-renal Defect Syndrome	type i pneumocyte	-0.46735	1	0.863	0.886324	0	0
137940	Hypotrichosis-lymphedema-telangiectasia-renal Defect Syndrome	type ii pneumocyte	-0.484156	1	0.787	0.886324	0	0
137940	Hypotrichosis-lymphedema-telangiectasia-renal Defect Syndrome	vascular associated smooth muscle cell	-0.426572	1	0.739	0.886324	0	0
137940	Hypotrichosis-lymphedema-telangiectasia-renal Defect Syndrome	vein endothelial cell	1.93195	1	0.009	0.126667	0	0
PS300000	Opitz GBBB syndrome	cd8-positive, alpha-beta t cell	-0.374081	1	0.766	0.967	0	0
PS300000	Opitz GBBB syndrome	cd4-positive, alpha-beta t cell	-0.371298	1	0.663	0.967	0	0
PS300000	Opitz GBBB syndrome	adventitial cell	-0.167289	1	0.491	0.967	0	0
PS300000	Opitz GBBB syndrome	alveolar fibroblast	1.46131	1	0.049	0.5092	0	0
PS300000	Opitz GBBB syndrome	b cell	-0.131462	1	0.357	0.967	0	0
PS300000	Opitz GBBB syndrome	basal cell	-0.31439	1	0.82	0.967	0	0
PS300000	Opitz GBBB syndrome	basophil	-0.556965	1	0.803	0.967	0	0
PS300000	Opitz GBBB syndrome	bronchial smooth muscle cell	0.642563	1	0.151	0.917429	0	0
PS300000	Opitz GBBB syndrome	bronchial vessel endothelial cell	1.26166	1	0.067	0.5092	0	0
PS300000	Opitz GBBB syndrome	capillary aerocyte	-0.231262	1	0.633	0.967	0	0
PS300000	Opitz GBBB syndrome	capillary endothelial cell	-0.192338	1	0.631	0.967	0	0
PS300000	Opitz GBBB syndrome	classical monocyte	-0.471792	1	0.754	0.967	0	0
PS300000	Opitz GBBB syndrome	club cell	-0.0837061	1	0.531	0.967	0	0
PS300000	Opitz GBBB syndrome	dendritic cell	-0.700244	1	0.853	0.967	0	0
PS300000	Opitz GBBB syndrome	endothelial cell of artery	0.0985425	1	0.304	0.967	0	0
PS300000	Opitz GBBB syndrome	endothelial cell of lymphatic vessel	0.394131	1	0.268	0.967	0	0
PS300000	Opitz GBBB syndrome	fibroblast	0.239038	1	0.327	0.967	0	0
PS300000	Opitz GBBB syndrome	intermediate monocyte	-0.924838	1	0.967	0.967	0	0
PS300000	Opitz GBBB syndrome	lung ciliated cell	-0.105388	1	0.558	0.967	0	0
PS300000	Opitz GBBB syndrome	lung microvascular endothelial cell	-0.180855	1	0.519	0.967	0	0
PS300000	Opitz GBBB syndrome	macrophage	-0.828597	1	0.919	0.967	0	0
PS300000	Opitz GBBB syndrome	mesothelial cell	-1.03571	1	0.941	0.967	0	0
PS300000	Opitz GBBB syndrome	myofibroblast cell	3.59472	1	0.046	0.5092	0	0
PS300000	Opitz GBBB syndrome	neutrophil	-0.710903	1	0.661	0.967	0	0
PS300000	Opitz GBBB syndrome	nk cell	0.98275	1	0.169	0.917429	0	0
PS300000	Opitz GBBB syndrome	non-classical monocyte	-0.442617	1	0.793	0.967	0	0
PS300000	Opitz GBBB syndrome	pericyte cell	-0.124108	1	0.609	0.967	0	0
PS300000	Opitz GBBB syndrome	plasma cell	-1.19941	1	0.838	0.967	0	0
PS300000	Opitz GBBB syndrome	plasmacytoid dendritic cell	2.72741	1	0.059	0.5092	0	0
PS300000	Opitz GBBB syndrome	pulmonary ionocyte	-0.969806	1	0.952	0.967	0	0
PS300000	Opitz GBBB syndrome	respiratory goblet cell	-0.346214	1	0.624	0.967	0	0
PS300000	Opitz GBBB syndrome	respiratory mucous cell	-1.53	1	0.953	0.967	0	0
PS300000	Opitz GBBB syndrome	serous cell of epithelium of bronchus	1.19021	1	0.042	0.5092	0	0
PS300000	Opitz GBBB syndrome	smooth muscle cell	0.0654683	1	0.249	0.967	0	0
PS300000	Opitz GBBB syndrome	type i pneumocyte	-0.101246	1	0.546	0.967	0	0
PS300000	Opitz GBBB syndrome	type ii pneumocyte	-0.0823002	1	0.373	0.967	0	0
PS300000	Opitz GBBB syndrome	vascular associated smooth muscle cell	-0.236415	1	0.59	0.967	0	0
PS300000	Opitz GBBB syndrome	vein endothelial cell	-0.244574	1	0.672	0.967	0	0
146510	Pallister-hall Syndrome 1	cd8-positive, alpha-beta t cell	-0.697561	1	0.93	0.953	0	0
146510	Pallister-hall Syndrome 1	cd4-positive, alpha-beta t cell	-0.742914	1	0.93	0.953	0	0
146510	Pallister-hall Syndrome 1	adventitial cell	1.47336	1	0.035	0.443333	0	0
146510	Pallister-hall Syndrome 1	alveolar fibroblast	2.91763	1	0.007	0.266	0	0
146510	Pallister-hall Syndrome 1	b cell	-0.77585	1	0.846	0.953	0	0
146510	Pallister-hall Syndrome 1	basal cell	1.65483	1	0.027	0.443333	0	0
146510	Pallister-hall Syndrome 1	basophil	-0.658926	1	0.869	0.953	0	0
146510	Pallister-hall Syndrome 1	bronchial smooth muscle cell	0.36811	1	0.186	0.635143	0	0
146510	Pallister-hall Syndrome 1	bronchial vessel endothelial cell	-0.379051	1	0.733	0.953	0	0
146510	Pallister-hall Syndrome 1	capillary aerocyte	-0.0209801	1	0.47	0.953	0	0
146510	Pallister-hall Syndrome 1	capillary endothelial cell	0.486448	1	0.228	0.635143	0	0
146510	Pallister-hall Syndrome 1	classical monocyte	-0.7522	1	0.922	0.953	0	0
146510	Pallister-hall Syndrome 1	club cell	-0.604757	1	0.925	0.953	0	0
146510	Pallister-hall Syndrome 1	dendritic cell	-0.77585	1	0.902	0.953	0	0
146510	Pallister-hall Syndrome 1	endothelial cell of artery	0.624636	1	0.188	0.635143	0	0
146510	Pallister-hall Syndrome 1	endothelial cell of lymphatic vessel	-0.435111	1	0.748	0.953	0	0
146510	Pallister-hall Syndrome 1	fibroblast	2.99947	1	0.067	0.5776	0	0
146510	Pallister-hall Syndrome 1	intermediate monocyte	-0.77585	1	0.92	0.953	0	0
146510	Pallister-hall Syndrome 1	lung ciliated cell	-0.357694	1	0.744	0.953	0	0
146510	Pallister-hall Syndrome 1	lung microvascular endothelial cell	-0.367212	1	0.766	0.953	0	0
146510	Pallister-hall Syndrome 1	macrophage	-0.758878	1	0.908	0.953	0	0
146510	Pallister-hall Syndrome 1	mesothelial cell	0.417211	1	0.163	0.635143	0	0
146510	Pallister-hall Syndrome 1	myofibroblast cell	0.753489	1	0.216	0.635143	0	0
146510	Pallister-hall Syndrome 1	neutrophil	-0.77585	1	0.708	0.953	0	0
146510	Pallister-hall Syndrome 1	nk cell	-0.64839	1	0.897	0.953	0	0
146510	Pallister-hall Syndrome 1	non-classical monocyte	-0.738362	1	0.953	0.953	0	0
146510	Pallister-hall Syndrome 1	pericyte cell	1.07508	1	0.132	0.635143	0	0
146510	Pallister-hall Syndrome 1	plasma cell	-0.77585	1	0.636	0.953	0	0
146510	Pallister-hall Syndrome 1	plasmacytoid dendritic cell	-0.77585	1	0.786	0.953	0	0
146510	Pallister-hall Syndrome 1	pulmonary ionocyte	-0.77585	1	0.916	0.953	0	0
146510	Pallister-hall Syndrome 1	respiratory goblet cell	0.0637452	1	0.139	0.635143	0	0
146510	Pallister-hall Syndrome 1	respiratory mucous cell	-0.77585	1	0.733	0.953	0	0
146510	Pallister-hall Syndrome 1	serous cell of epithelium of bronchus	-0.376291	1	0.494	0.953	0	0
146510	Pallister-hall Syndrome 1	smooth muscle cell	0.168937	1	0.234	0.635143	0	0
146510	Pallister-hall Syndrome 1	type i pneumocyte	-0.550059	1	0.915	0.953	0	0
146510	Pallister-hall Syndrome 1	type ii pneumocyte	0.0801228	1	0.216	0.635143	0	0
146510	Pallister-hall Syndrome 1	vascular associated smooth muscle cell	1.42648	1	0.076	0.5776	0	0
146510	Pallister-hall Syndrome 1	vein endothelial cell	-0.214361	1	0.656	0.953	0	0
PS147060	Hyper-IgE recurrent infection syndrome	cd8-positive, alpha-beta t cell	-0.396105	4	0.924	0.998	0	0
PS147060	Hyper-IgE recurrent infection syndrome	cd4-positive, alpha-beta t cell	0.127976	4	0.138	0.782353	0	0
PS147060	Hyper-IgE recurrent infection syndrome	adventitial cell	-0.144304	4	0.444	0.937333	0	0
PS147060	Hyper-IgE recurrent infection syndrome	alveolar fibroblast	0.243584	4	0.161	0.782353	0	0
PS147060	Hyper-IgE recurrent infection syndrome	b cell	-0.638785	4	0.894	0.998	0	0
PS147060	Hyper-IgE recurrent infection syndrome	basal cell	-0.472241	4	0.998	0.998	0	0
PS147060	Hyper-IgE recurrent infection syndrome	basophil	-0.383391	4	0.764	0.998	0	0
PS147060	Hyper-IgE recurrent infection syndrome	bronchial smooth muscle cell	-0.389436	4	0.821	0.998	0	0
PS147060	Hyper-IgE recurrent infection syndrome	bronchial vessel endothelial cell	0.0280398	4	0.238	0.782353	0	0
PS147060	Hyper-IgE recurrent infection syndrome	capillary aerocyte	-0.17932	4	0.654	0.998	0	0
PS147060	Hyper-IgE recurrent infection syndrome	capillary endothelial cell	0.172105	4	0.273	0.782353	0	0
PS147060	Hyper-IgE recurrent infection syndrome	classical monocyte	0.253044	4	0.069	0.782353	0	0
PS147060	Hyper-IgE recurrent infection syndrome	club cell	-0.00636019	4	0.35	0.782353	0	0
PS147060	Hyper-IgE recurrent infection syndrome	dendritic cell	-0.397467	4	0.728	0.998	0	0
PS147060	Hyper-IgE recurrent infection syndrome	endothelial cell of artery	0.0494434	4	0.31	0.782353	0	0
PS147060	Hyper-IgE recurrent infection syndrome	endothelial cell of lymphatic vessel	0.125758	4	0.282	0.782353	0	0
PS147060	Hyper-IgE recurrent infection syndrome	fibroblast	0.707498	4	0.149	0.782353	0	0
PS147060	Hyper-IgE recurrent infection syndrome	intermediate monocyte	-0.185207	4	0.496	0.9424	0	0
PS147060	Hyper-IgE recurrent infection syndrome	lung ciliated cell	-0.349592	4	0.887	0.998	0	0
PS147060	Hyper-IgE recurrent infection syndrome	lung microvascular endothelial cell	-0.342033	4	0.869	0.998	0	0
PS147060	Hyper-IgE recurrent infection syndrome	macrophage	-0.603624	4	0.939	0.998	0	0
PS147060	Hyper-IgE recurrent infection syndrome	mesothelial cell	0.209336	4	0.082	0.782353	0	0
PS147060	Hyper-IgE recurrent infection syndrome	myofibroblast cell	0.0272679	4	0.307	0.782353	0	0
PS147060	Hyper-IgE recurrent infection syndrome	neutrophil	2.95618	4	0	0	1	0
PS147060	Hyper-IgE recurrent infection syndrome	nk cell	-0.382221	4	0.876	0.998	0	0
PS147060	Hyper-IgE recurrent infection syndrome	non-classical monocyte	0.0997881	4	0.185	0.782353	0	0
PS147060	Hyper-IgE recurrent infection syndrome	pericyte cell	-0.177506	4	0.747	0.998	0	0
PS147060	Hyper-IgE recurrent infection syndrome	plasma cell	-0.590891	4	0.493	0.9424	0	0
PS147060	Hyper-IgE recurrent infection syndrome	plasmacytoid dendritic cell	-0.634076	4	0.834	0.998	0	0
PS147060	Hyper-IgE recurrent infection syndrome	pulmonary ionocyte	-0.588088	4	0.959	0.998	0	0
PS147060	Hyper-IgE recurrent infection syndrome	respiratory goblet cell	-0.694924	4	0.991	0.998	0	0
PS147060	Hyper-IgE recurrent infection syndrome	respiratory mucous cell	-0.659971	4	0.746	0.998	0	0
PS147060	Hyper-IgE recurrent infection syndrome	serous cell of epithelium of bronchus	-0.790533	4	0.876	0.998	0	0
PS147060	Hyper-IgE recurrent infection syndrome	smooth muscle cell	0.0160187	4	0.206	0.782353	0	0
PS147060	Hyper-IgE recurrent infection syndrome	type i pneumocyte	-0.0724923	4	0.567	0.998	0	0
PS147060	Hyper-IgE recurrent infection syndrome	type ii pneumocyte	-0.114781	4	0.345	0.782353	0	0
PS147060	Hyper-IgE recurrent infection syndrome	vascular associated smooth muscle cell	0.0926411	4	0.272	0.782353	0	0
PS147060	Hyper-IgE recurrent infection syndrome	vein endothelial cell	0.10186	4	0.207	0.782353	0	0
PS147920	Kabuki syndrome	cd8-positive, alpha-beta t cell	0.695826	1	0.149	0.589	0	0
PS147920	Kabuki syndrome	cd4-positive, alpha-beta t cell	-0.107577	1	0.415	0.83	0	0
PS147920	Kabuki syndrome	adventitial cell	-0.845538	1	0.914	0.997	0	0
PS147920	Kabuki syndrome	alveolar fibroblast	-0.771942	1	0.959	0.997	0	0
PS147920	Kabuki syndrome	b cell	0.130574	1	0.191	0.589	0	0
PS147920	Kabuki syndrome	basal cell	-0.0935949	1	0.538	0.997	0	0
PS147920	Kabuki syndrome	basophil	-0.509411	1	0.756	0.997	0	0
PS147920	Kabuki syndrome	bronchial smooth muscle cell	-0.489803	1	0.784	0.997	0	0
PS147920	Kabuki syndrome	bronchial vessel endothelial cell	0.256523	1	0.227	0.589	0	0
PS147920	Kabuki syndrome	capillary aerocyte	0.86112	1	0.133	0.589	0	0
PS147920	Kabuki syndrome	capillary endothelial cell	1.0376	1	0.098	0.589	0	0
PS147920	Kabuki syndrome	classical monocyte	0.0720498	1	0.211	0.589	0	0
PS147920	Kabuki syndrome	club cell	1.02953	1	0.061	0.589	0	0
PS147920	Kabuki syndrome	dendritic cell	0.0335795	1	0.187	0.589	0	0
PS147920	Kabuki syndrome	endothelial cell of artery	0.0712705	1	0.341	0.719889	0	0
PS147920	Kabuki syndrome	endothelial cell of lymphatic vessel	-0.429904	1	0.763	0.997	0	0
PS147920	Kabuki syndrome	fibroblast	1.478	1	0.139	0.589	0	0
PS147920	Kabuki syndrome	intermediate monocyte	0.179431	1	0.238	0.589	0	0
PS147920	Kabuki syndrome	lung ciliated cell	-0.263218	1	0.671	0.997	0	0
PS147920	Kabuki syndrome	lung microvascular endothelial cell	0.0473692	1	0.248	0.589	0	0
PS147920	Kabuki syndrome	macrophage	-0.56893	1	0.746	0.997	0	0
PS147920	Kabuki syndrome	mesothelial cell	-0.903386	1	0.892	0.997	0	0
PS147920	Kabuki syndrome	myofibroblast cell	-1.96396	1	0.997	0.997	0	0
PS147920	Kabuki syndrome	neutrophil	3.58995	1	0.04	0.589	0	0
PS147920	Kabuki syndrome	nk cell	1.7181	1	0.109	0.589	0	0
PS147920	Kabuki syndrome	non-classical monocyte	0.312824	1	0.193	0.589	0	0
PS147920	Kabuki syndrome	pericyte cell	-0.924357	1	0.981	0.997	0	0
PS147920	Kabuki syndrome	plasma cell	-1.67056	1	0.947	0.997	0	0
PS147920	Kabuki syndrome	plasmacytoid dendritic cell	-1.06204	1	0.875	0.997	0	0
PS147920	Kabuki syndrome	pulmonary ionocyte	-0.920907	1	0.95	0.997	0	0
PS147920	Kabuki syndrome	respiratory goblet cell	-0.687079	1	0.882	0.997	0	0
PS147920	Kabuki syndrome	respiratory mucous cell	0.702502	1	0.071	0.589	0	0
PS147920	Kabuki syndrome	serous cell of epithelium of bronchus	-0.0525211	1	0.273	0.610235	0	0
PS147920	Kabuki syndrome	smooth muscle cell	-0.423252	1	0.629	0.997	0	0
PS147920	Kabuki syndrome	type i pneumocyte	-0.141914	1	0.596	0.997	0	0
PS147920	Kabuki syndrome	type ii pneumocyte	-0.247915	1	0.559	0.997	0	0
PS147920	Kabuki syndrome	vascular associated smooth muscle cell	-0.305455	1	0.652	0.997	0	0
PS147920	Kabuki syndrome	vein endothelial cell	1.16701	1	0.039	0.589	0	0
150550	Periodic Fever, Immunodeficiency, And Thrombocytopenia Syndrome	cd8-positive, alpha-beta t cell	0.325978	1	0.223	0.564933	0	0
150550	Periodic Fever, Immunodeficiency, And Thrombocytopenia Syndrome	cd4-positive, alpha-beta t cell	-0.448438	1	0.761	0.997	0	0
150550	Periodic Fever, Immunodeficiency, And Thrombocytopenia Syndrome	adventitial cell	-0.940604	1	0.953	0.997	0	0
150550	Periodic Fever, Immunodeficiency, And Thrombocytopenia Syndrome	alveolar fibroblast	-0.914928	1	0.987	0.997	0	0
150550	Periodic Fever, Immunodeficiency, And Thrombocytopenia Syndrome	b cell	-0.499412	1	0.715	0.997	0	0
150550	Periodic Fever, Immunodeficiency, And Thrombocytopenia Syndrome	basal cell	-0.887606	1	0.997	0.997	0	0
150550	Periodic Fever, Immunodeficiency, And Thrombocytopenia Syndrome	basophil	-0.920643	1	0.965	0.997	0	0
150550	Periodic Fever, Immunodeficiency, And Thrombocytopenia Syndrome	bronchial smooth muscle cell	2.20699	1	0.024	0.502143	0	0
150550	Periodic Fever, Immunodeficiency, And Thrombocytopenia Syndrome	bronchial vessel endothelial cell	1.69957	1	0.054	0.502143	0	0
150550	Periodic Fever, Immunodeficiency, And Thrombocytopenia Syndrome	capillary aerocyte	1.5312	1	0.066	0.502143	0	0
150550	Periodic Fever, Immunodeficiency, And Thrombocytopenia Syndrome	capillary endothelial cell	0.797493	1	0.162	0.502143	0	0
150550	Periodic Fever, Immunodeficiency, And Thrombocytopenia Syndrome	classical monocyte	0.705023	1	0.102	0.502143	0	0
150550	Periodic Fever, Immunodeficiency, And Thrombocytopenia Syndrome	club cell	-1.0364	1	0.997	0.997	0	0
150550	Periodic Fever, Immunodeficiency, And Thrombocytopenia Syndrome	dendritic cell	0.107718	1	0.174	0.502143	0	0
150550	Periodic Fever, Immunodeficiency, And Thrombocytopenia Syndrome	endothelial cell of artery	-0.0398956	1	0.497	0.994	0	0
150550	Periodic Fever, Immunodeficiency, And Thrombocytopenia Syndrome	endothelial cell of lymphatic vessel	-0.694748	1	0.855	0.997	0	0
150550	Periodic Fever, Immunodeficiency, And Thrombocytopenia Syndrome	fibroblast	-0.566641	1	0.765	0.997	0	0
150550	Periodic Fever, Immunodeficiency, And Thrombocytopenia Syndrome	intermediate monocyte	0.762866	1	0.105	0.502143	0	0
150550	Periodic Fever, Immunodeficiency, And Thrombocytopenia Syndrome	lung ciliated cell	-0.581029	1	0.882	0.997	0	0
150550	Periodic Fever, Immunodeficiency, And Thrombocytopenia Syndrome	lung microvascular endothelial cell	-0.598462	1	0.933	0.997	0	0
150550	Periodic Fever, Immunodeficiency, And Thrombocytopenia Syndrome	macrophage	0.103526	1	0.133	0.502143	0	0
150550	Periodic Fever, Immunodeficiency, And Thrombocytopenia Syndrome	mesothelial cell	-0.35841	1	0.611	0.997	0	0
150550	Periodic Fever, Immunodeficiency, And Thrombocytopenia Syndrome	myofibroblast cell	-0.466828	1	0.721	0.997	0	0
150550	Periodic Fever, Immunodeficiency, And Thrombocytopenia Syndrome	neutrophil	-0.222907	1	0.333	0.744353	0	0
150550	Periodic Fever, Immunodeficiency, And Thrombocytopenia Syndrome	nk cell	1.30512	1	0.138	0.502143	0	0
150550	Periodic Fever, Immunodeficiency, And Thrombocytopenia Syndrome	non-classical monocyte	0.357624	1	0.185	0.502143	0	0
150550	Periodic Fever, Immunodeficiency, And Thrombocytopenia Syndrome	pericyte cell	0.235631	1	0.327	0.744353	0	0
150550	Periodic Fever, Immunodeficiency, And Thrombocytopenia Syndrome	plasma cell	-1.77853	1	0.971	0.997	0	0
150550	Periodic Fever, Immunodeficiency, And Thrombocytopenia Syndrome	plasmacytoid dendritic cell	1.1531	1	0.148	0.502143	0	0
150550	Periodic Fever, Immunodeficiency, And Thrombocytopenia Syndrome	pulmonary ionocyte	1.40225	1	0.174	0.502143	0	0
150550	Periodic Fever, Immunodeficiency, And Thrombocytopenia Syndrome	respiratory goblet cell	-0.903737	1	0.966	0.997	0	0
150550	Periodic Fever, Immunodeficiency, And Thrombocytopenia Syndrome	respiratory mucous cell	-1.02877	1	0.815	0.997	0	0
150550	Periodic Fever, Immunodeficiency, And Thrombocytopenia Syndrome	serous cell of epithelium of bronchus	-1.39497	1	0.944	0.997	0	0
150550	Periodic Fever, Immunodeficiency, And Thrombocytopenia Syndrome	smooth muscle cell	1.14366	1	0.106	0.502143	0	0
150550	Periodic Fever, Immunodeficiency, And Thrombocytopenia Syndrome	type i pneumocyte	-0.536527	1	0.894	0.997	0	0
150550	Periodic Fever, Immunodeficiency, And Thrombocytopenia Syndrome	type ii pneumocyte	-0.914868	1	0.986	0.997	0	0
150550	Periodic Fever, Immunodeficiency, And Thrombocytopenia Syndrome	vascular associated smooth muscle cell	1.91658	1	0.055	0.502143	0	0
150550	Periodic Fever, Immunodeficiency, And Thrombocytopenia Syndrome	vein endothelial cell	-0.0199736	1	0.478	0.994	0	0
PS151623	Li-Fraumeni syndrome	cd8-positive, alpha-beta t cell	0.322333	1	0.245	0.6574	0	0
PS151623	Li-Fraumeni syndrome	cd4-positive, alpha-beta t cell	-0.187167	1	0.502	0.908381	0	0
PS151623	Li-Fraumeni syndrome	adventitial cell	-0.669207	1	0.873	0.993	0	0
PS151623	Li-Fraumeni syndrome	alveolar fibroblast	-0.355814	1	0.756	0.993	0	0
PS151623	Li-Fraumeni syndrome	b cell	-0.0833989	1	0.346	0.6574	0	0
PS151623	Li-Fraumeni syndrome	basal cell	1.59988	1	0.035	0.3325	0	0
PS151623	Li-Fraumeni syndrome	basophil	-0.704414	1	0.904	0.993	0	0
PS151623	Li-Fraumeni syndrome	bronchial smooth muscle cell	-0.513852	1	0.762	0.993	0	0
PS151623	Li-Fraumeni syndrome	bronchial vessel endothelial cell	1.61758	1	0.059	0.373667	0	0
PS151623	Li-Fraumeni syndrome	capillary aerocyte	-0.580181	1	0.9	0.993	0	0
PS151623	Li-Fraumeni syndrome	capillary endothelial cell	-0.858392	1	0.98	0.993	0	0
PS151623	Li-Fraumeni syndrome	classical monocyte	1.32569	1	0.049	0.3724	0	0
PS151623	Li-Fraumeni syndrome	club cell	1.83717	1	0.02	0.3325	0	0
PS151623	Li-Fraumeni syndrome	dendritic cell	0.543576	1	0.085	0.38	0	0
PS151623	Li-Fraumeni syndrome	endothelial cell of artery	0.98425	1	0.1	0.38	0	0
PS151623	Li-Fraumeni syndrome	endothelial cell of lymphatic vessel	1.04438	1	0.169	0.526154	0	0
PS151623	Li-Fraumeni syndrome	fibroblast	-1.82439	1	0.977	0.993	0	0
PS151623	Li-Fraumeni syndrome	intermediate monocyte	1.70104	1	0.025	0.3325	0	0
PS151623	Li-Fraumeni syndrome	lung ciliated cell	-1.12616	1	0.993	0.993	0	0
PS151623	Li-Fraumeni syndrome	lung microvascular endothelial cell	1.41761	1	0.028	0.3325	0	0
PS151623	Li-Fraumeni syndrome	macrophage	-0.602457	1	0.793	0.993	0	0
PS151623	Li-Fraumeni syndrome	mesothelial cell	-0.331342	1	0.583	0.993	0	0
PS151623	Li-Fraumeni syndrome	myofibroblast cell	-1.18637	1	0.941	0.993	0	0
PS151623	Li-Fraumeni syndrome	neutrophil	-1.18768	1	0.829	0.993	0	0
PS151623	Li-Fraumeni syndrome	nk cell	0.482605	1	0.268	0.6574	0	0
PS151623	Li-Fraumeni syndrome	non-classical monocyte	0.962599	1	0.096	0.38	0	0
PS151623	Li-Fraumeni syndrome	pericyte cell	0.718412	1	0.18	0.526154	0	0
PS151623	Li-Fraumeni syndrome	plasma cell	-1.44615	1	0.899	0.993	0	0
PS151623	Li-Fraumeni syndrome	plasmacytoid dendritic cell	-1.097	1	0.884	0.993	0	0
PS151623	Li-Fraumeni syndrome	pulmonary ionocyte	0.270423	1	0.324	0.6574	0	0
PS151623	Li-Fraumeni syndrome	respiratory goblet cell	0.284255	1	0.089	0.38	0	0
PS151623	Li-Fraumeni syndrome	respiratory mucous cell	-0.0396676	1	0.284	0.6574	0	0
PS151623	Li-Fraumeni syndrome	serous cell of epithelium of bronchus	-1.71778	1	0.977	0.993	0	0
PS151623	Li-Fraumeni syndrome	smooth muscle cell	-0.857533	1	0.83	0.993	0	0
PS151623	Li-Fraumeni syndrome	type i pneumocyte	-0.249048	1	0.683	0.993	0	0
PS151623	Li-Fraumeni syndrome	type ii pneumocyte	0.314148	1	0.13	0.449091	0	0
PS151623	Li-Fraumeni syndrome	vascular associated smooth muscle cell	0.111808	1	0.311	0.6574	0	0
PS151623	Li-Fraumeni syndrome	vein endothelial cell	0.0802551	1	0.333	0.6574	0	0
152700	Systemic Lupus Erythematosus	cd8-positive, alpha-beta t cell	1.20757	5	0.007	0.0886667	1	0
152700	Systemic Lupus Erythematosus	cd4-positive, alpha-beta t cell	0.743092	5	0.005	0.0886667	0	0
152700	Systemic Lupus Erythematosus	adventitial cell	-0.263816	5	0.668	0.92	0	0
152700	Systemic Lupus Erythematosus	alveolar fibroblast	-0.313043	5	0.839	0.92	0	0
152700	Systemic Lupus Erythematosus	b cell	-0.222516	5	0.395	0.92	0	1
152700	Systemic Lupus Erythematosus	basal cell	-0.285374	5	0.92	0.92	0	0
152700	Systemic Lupus Erythematosus	basophil	-0.20483	5	0.446	0.92	0	0
152700	Systemic Lupus Erythematosus	bronchial smooth muscle cell	-0.313043	5	0.775	0.92	0	0
152700	Systemic Lupus Erythematosus	bronchial vessel endothelial cell	-0.342454	5	0.774	0.92	0	0
152700	Systemic Lupus Erythematosus	capillary aerocyte	-0.272941	5	0.791	0.92	0	0
152700	Systemic Lupus Erythematosus	capillary endothelial cell	-0.307972	5	0.899	0.92	0	0
152700	Systemic Lupus Erythematosus	classical monocyte	-0.0921938	5	0.288	0.92	0	0
152700	Systemic Lupus Erythematosus	club cell	-0.266403	5	0.788	0.92	0	0
152700	Systemic Lupus Erythematosus	dendritic cell	0.987249	5	0	0	0	1
152700	Systemic Lupus Erythematosus	endothelial cell of artery	-0.313043	5	0.873	0.92	0	0
152700	Systemic Lupus Erythematosus	endothelial cell of lymphatic vessel	-0.313043	5	0.776	0.92	0	0
152700	Systemic Lupus Erythematosus	fibroblast	-0.313043	5	0.744	0.92	0	0
152700	Systemic Lupus Erythematosus	intermediate monocyte	-0.0500827	5	0.328	0.92	0	0
152700	Systemic Lupus Erythematosus	lung ciliated cell	-0.277526	5	0.812	0.92	0	0
152700	Systemic Lupus Erythematosus	lung microvascular endothelial cell	-0.366306	5	0.886	0.92	0	0
152700	Systemic Lupus Erythematosus	macrophage	0.165454	5	0.012	0.114	0	0
152700	Systemic Lupus Erythematosus	mesothelial cell	-0.119621	5	0.332	0.92	0	0
152700	Systemic Lupus Erythematosus	myofibroblast cell	-0.263816	5	0.687	0.92	0	0
152700	Systemic Lupus Erythematosus	neutrophil	0.0492596	5	0.03	0.228	0	0
152700	Systemic Lupus Erythematosus	nk cell	0.0981629	5	0.253	0.92	0	0
152700	Systemic Lupus Erythematosus	non-classical monocyte	0.312642	5	0.048	0.304	0	0
152700	Systemic Lupus Erythematosus	pericyte cell	-0.228849	5	0.841	0.92	0	0
152700	Systemic Lupus Erythematosus	plasma cell	-0.316255	5	0.167	0.906571	0	0
152700	Systemic Lupus Erythematosus	plasmacytoid dendritic cell	-0.411776	5	0.701	0.92	0	1
152700	Systemic Lupus Erythematosus	pulmonary ionocyte	-0.313043	5	0.792	0.92	0	0
152700	Systemic Lupus Erythematosus	respiratory goblet cell	-0.306183	5	0.623	0.92	0	0
152700	Systemic Lupus Erythematosus	respiratory mucous cell	-0.395973	5	0.498	0.92	0	0
152700	Systemic Lupus Erythematosus	serous cell of epithelium of bronchus	-0.313043	5	0.415	0.92	0	0
152700	Systemic Lupus Erythematosus	smooth muscle cell	-0.411776	5	0.725	0.92	0	0
152700	Systemic Lupus Erythematosus	type i pneumocyte	-0.298591	5	0.88	0.92	0	0
152700	Systemic Lupus Erythematosus	type ii pneumocyte	-0.354746	5	0.788	0.92	0	0
152700	Systemic Lupus Erythematosus	vascular associated smooth muscle cell	-0.281061	5	0.746	0.92	0	0
152700	Systemic Lupus Erythematosus	vein endothelial cell	-0.272031	5	0.855	0.92	0	0
154700	Marfan Syndrome	cd8-positive, alpha-beta t cell	-0.33761	1	0.737	0.781	0	0
154700	Marfan Syndrome	cd4-positive, alpha-beta t cell	-0.340423	1	0.676	0.781	0	0
154700	Marfan Syndrome	adventitial cell	4.62753	1	0.002	0.076	1	0
154700	Marfan Syndrome	alveolar fibroblast	1.33518	1	0.064	0.781	0	0
154700	Marfan Syndrome	b cell	-0.34503	1	0.547	0.781	0	0
154700	Marfan Syndrome	basal cell	-0.284845	1	0.746	0.781	0	0
154700	Marfan Syndrome	basophil	-0.341092	1	0.62	0.781	0	0
154700	Marfan Syndrome	bronchial smooth muscle cell	-0.226224	1	0.565	0.781	0	0
154700	Marfan Syndrome	bronchial vessel endothelial cell	-0.149777	1	0.487	0.781	0	0
154700	Marfan Syndrome	capillary aerocyte	-0.33324	1	0.735	0.781	0	0
154700	Marfan Syndrome	capillary endothelial cell	-0.330161	1	0.776	0.781	0	0
154700	Marfan Syndrome	classical monocyte	-0.344372	1	0.624	0.781	0	0
154700	Marfan Syndrome	club cell	-0.309331	1	0.728	0.781	0	0
154700	Marfan Syndrome	dendritic cell	-0.339171	1	0.578	0.781	0	0
154700	Marfan Syndrome	endothelial cell of artery	-0.202041	1	0.602	0.781	0	0
154700	Marfan Syndrome	endothelial cell of lymphatic vessel	0.172976	1	0.311	0.781	0	0
154700	Marfan Syndrome	fibroblast	3.28218	1	0.047	0.781	0	0
154700	Marfan Syndrome	intermediate monocyte	-0.34503	1	0.641	0.781	0	0
154700	Marfan Syndrome	lung ciliated cell	-0.335377	1	0.753	0.781	0	0
154700	Marfan Syndrome	lung microvascular endothelial cell	-0.132309	1	0.453	0.781	0	0
154700	Marfan Syndrome	macrophage	-0.342757	1	0.579	0.781	0	0
154700	Marfan Syndrome	mesothelial cell	-0.297622	1	0.579	0.781	0	0
154700	Marfan Syndrome	myofibroblast cell	0.0890257	1	0.329	0.781	0	0
154700	Marfan Syndrome	neutrophil	-0.34503	1	0.458	0.781	0	0
154700	Marfan Syndrome	nk cell	-0.32893	1	0.705	0.781	0	0
154700	Marfan Syndrome	non-classical monocyte	-0.343069	1	0.678	0.781	0	0
154700	Marfan Syndrome	pericyte cell	-0.145652	1	0.601	0.781	0	0
154700	Marfan Syndrome	plasma cell	-0.342856	1	0.321	0.781	0	0
154700	Marfan Syndrome	plasmacytoid dendritic cell	-0.34503	1	0.57	0.781	0	0
154700	Marfan Syndrome	pulmonary ionocyte	-0.34503	1	0.669	0.781	0	0
154700	Marfan Syndrome	respiratory goblet cell	-0.325238	1	0.62	0.781	0	0
154700	Marfan Syndrome	respiratory mucous cell	-0.34503	1	0.448	0.781	0	0
154700	Marfan Syndrome	serous cell of epithelium of bronchus	-0.34503	1	0.496	0.781	0	0
154700	Marfan Syndrome	smooth muscle cell	-0.149781	1	0.434	0.781	0	1
154700	Marfan Syndrome	type i pneumocyte	-0.33126	1	0.781	0.781	0	0
154700	Marfan Syndrome	type ii pneumocyte	-0.342195	1	0.662	0.781	0	0
154700	Marfan Syndrome	vascular associated smooth muscle cell	-0.028097	1	0.462	0.781	0	1
154700	Marfan Syndrome	vein endothelial cell	-0.108248	1	0.544	0.781	0	0
158310	Mucoepithelial Dysplasia, Hereditary	cd8-positive, alpha-beta t cell	-0.603844	1	0.9	1	0	0
158310	Mucoepithelial Dysplasia, Hereditary	cd4-positive, alpha-beta t cell	-0.795512	1	0.947	1	0	0
158310	Mucoepithelial Dysplasia, Hereditary	adventitial cell	1.17593	1	0.062	0.405333	0	0
158310	Mucoepithelial Dysplasia, Hereditary	alveolar fibroblast	1.11313	1	0.091	0.405333	0	0
158310	Mucoepithelial Dysplasia, Hereditary	b cell	-1.06938	1	0.923	1	0	0
158310	Mucoepithelial Dysplasia, Hereditary	basal cell	0.691351	1	0.125	0.431818	0	0
158310	Mucoepithelial Dysplasia, Hereditary	basophil	-1.15529	1	0.991	1	0	0
158310	Mucoepithelial Dysplasia, Hereditary	bronchial smooth muscle cell	-0.878392	1	0.94	1	0	0
158310	Mucoepithelial Dysplasia, Hereditary	bronchial vessel endothelial cell	-0.228858	1	0.569	1	0	0
158310	Mucoepithelial Dysplasia, Hereditary	capillary aerocyte	-0.46876	1	0.85	1	0	0
158310	Mucoepithelial Dysplasia, Hereditary	capillary endothelial cell	-0.334227	1	0.779	1	0	0
158310	Mucoepithelial Dysplasia, Hereditary	classical monocyte	-0.619666	1	0.866	1	0	0
158310	Mucoepithelial Dysplasia, Hereditary	club cell	0.802646	1	0.075	0.405333	0	0
158310	Mucoepithelial Dysplasia, Hereditary	dendritic cell	-0.612973	1	0.802	1	0	0
158310	Mucoepithelial Dysplasia, Hereditary	endothelial cell of artery	-0.0668344	1	0.538	1	0	0
158310	Mucoepithelial Dysplasia, Hereditary	endothelial cell of lymphatic vessel	-0.730897	1	0.876	1	0	0
158310	Mucoepithelial Dysplasia, Hereditary	fibroblast	-0.0334045	1	0.498	1	0	0
158310	Mucoepithelial Dysplasia, Hereditary	intermediate monocyte	-0.822466	1	0.935	1	0	0
158310	Mucoepithelial Dysplasia, Hereditary	lung ciliated cell	-0.208217	1	0.625	1	0	0
158310	Mucoepithelial Dysplasia, Hereditary	lung microvascular endothelial cell	-1.10016	1	1	1	0	0
158310	Mucoepithelial Dysplasia, Hereditary	macrophage	-0.473255	1	0.682	1	0	0
158310	Mucoepithelial Dysplasia, Hereditary	mesothelial cell	-0.704453	1	0.847	1	0	0
158310	Mucoepithelial Dysplasia, Hereditary	myofibroblast cell	2.63367	1	0.059	0.405333	0	0
158310	Mucoepithelial Dysplasia, Hereditary	neutrophil	1.41389	1	0.073	0.405333	0	0
158310	Mucoepithelial Dysplasia, Hereditary	nk cell	0.158215	1	0.342	1	0	0
158310	Mucoepithelial Dysplasia, Hereditary	non-classical monocyte	-0.124708	1	0.479	1	0	0
158310	Mucoepithelial Dysplasia, Hereditary	pericyte cell	-0.329809	1	0.754	1	0	0
158310	Mucoepithelial Dysplasia, Hereditary	plasma cell	-1.10609	1	0.779	1	0	0
158310	Mucoepithelial Dysplasia, Hereditary	plasmacytoid dendritic cell	-1.39604	1	0.951	1	0	0
158310	Mucoepithelial Dysplasia, Hereditary	pulmonary ionocyte	2.19012	1	0.096	0.405333	0	0
158310	Mucoepithelial Dysplasia, Hereditary	respiratory goblet cell	0.553903	1	0.066	0.405333	0	0
158310	Mucoepithelial Dysplasia, Hereditary	respiratory mucous cell	1.8049	1	0.03	0.405333	0	0
158310	Mucoepithelial Dysplasia, Hereditary	serous cell of epithelium of bronchus	-0.582226	1	0.638	1	0	0
158310	Mucoepithelial Dysplasia, Hereditary	smooth muscle cell	-0.165988	1	0.424	1	0	0
158310	Mucoepithelial Dysplasia, Hereditary	type i pneumocyte	0.999282	1	0.12	0.431818	0	0
158310	Mucoepithelial Dysplasia, Hereditary	type ii pneumocyte	1.58451	1	0.029	0.405333	0	0
158310	Mucoepithelial Dysplasia, Hereditary	vascular associated smooth muscle cell	-0.414632	1	0.755	1	0	0
158310	Mucoepithelial Dysplasia, Hereditary	vein endothelial cell	-0.0954664	1	0.523	1	0	0
159950	Spinal Muscular Atrophy With Progressive Myoclonic Epilepsy	cd8-positive, alpha-beta t cell	-0.789372	1	0.966	0.983	0	0
159950	Spinal Muscular Atrophy With Progressive Myoclonic Epilepsy	cd4-positive, alpha-beta t cell	-0.751962	1	0.939	0.983	0	0
159950	Spinal Muscular Atrophy With Progressive Myoclonic Epilepsy	adventitial cell	-0.547437	1	0.795	0.983	0	0
159950	Spinal Muscular Atrophy With Progressive Myoclonic Epilepsy	alveolar fibroblast	-0.637977	1	0.907	0.983	0	0
159950	Spinal Muscular Atrophy With Progressive Myoclonic Epilepsy	b cell	-0.730151	1	0.81	0.983	0	0
159950	Spinal Muscular Atrophy With Progressive Myoclonic Epilepsy	basal cell	0.0397237	1	0.362	0.983	0	0
159950	Spinal Muscular Atrophy With Progressive Myoclonic Epilepsy	basophil	1.73714	1	0.023	0.291333	0	0
159950	Spinal Muscular Atrophy With Progressive Myoclonic Epilepsy	bronchial smooth muscle cell	-0.409524	1	0.719	0.983	0	0
159950	Spinal Muscular Atrophy With Progressive Myoclonic Epilepsy	bronchial vessel endothelial cell	-0.932104	1	0.947	0.983	0	0
159950	Spinal Muscular Atrophy With Progressive Myoclonic Epilepsy	capillary aerocyte	-0.450743	1	0.833	0.983	0	0
159950	Spinal Muscular Atrophy With Progressive Myoclonic Epilepsy	capillary endothelial cell	-0.51927	1	0.914	0.983	0	0
159950	Spinal Muscular Atrophy With Progressive Myoclonic Epilepsy	classical monocyte	1.10784	1	0.074	0.312444	0	0
159950	Spinal Muscular Atrophy With Progressive Myoclonic Epilepsy	club cell	1.14423	1	0.049	0.312444	0	0
159950	Spinal Muscular Atrophy With Progressive Myoclonic Epilepsy	dendritic cell	-0.547403	1	0.747	0.983	0	0
159950	Spinal Muscular Atrophy With Progressive Myoclonic Epilepsy	endothelial cell of artery	-0.545787	1	0.91	0.983	0	0
159950	Spinal Muscular Atrophy With Progressive Myoclonic Epilepsy	endothelial cell of lymphatic vessel	-0.632364	1	0.86	0.983	0	0
159950	Spinal Muscular Atrophy With Progressive Myoclonic Epilepsy	fibroblast	-0.402144	1	0.692	0.983	0	0
159950	Spinal Muscular Atrophy With Progressive Myoclonic Epilepsy	intermediate monocyte	1.32175	1	0.065	0.312444	0	0
159950	Spinal Muscular Atrophy With Progressive Myoclonic Epilepsy	lung ciliated cell	-0.141568	1	0.581	0.983	0	0
159950	Spinal Muscular Atrophy With Progressive Myoclonic Epilepsy	lung microvascular endothelial cell	-0.793871	1	0.983	0.983	0	0
159950	Spinal Muscular Atrophy With Progressive Myoclonic Epilepsy	macrophage	2.6565	1	0.014	0.291333	0	0
159950	Spinal Muscular Atrophy With Progressive Myoclonic Epilepsy	mesothelial cell	-0.557565	1	0.764	0.983	0	0
159950	Spinal Muscular Atrophy With Progressive Myoclonic Epilepsy	myofibroblast cell	-0.15349	1	0.526	0.983	0	0
159950	Spinal Muscular Atrophy With Progressive Myoclonic Epilepsy	neutrophil	2.39297	1	0.066	0.312444	0	0
159950	Spinal Muscular Atrophy With Progressive Myoclonic Epilepsy	nk cell	-0.593056	1	0.866	0.983	0	0
159950	Spinal Muscular Atrophy With Progressive Myoclonic Epilepsy	non-classical monocyte	2.02552	1	0.02	0.291333	0	0
159950	Spinal Muscular Atrophy With Progressive Myoclonic Epilepsy	pericyte cell	-0.263643	1	0.717	0.983	0	0
159950	Spinal Muscular Atrophy With Progressive Myoclonic Epilepsy	plasma cell	-0.723066	1	0.565	0.983	0	0
159950	Spinal Muscular Atrophy With Progressive Myoclonic Epilepsy	plasmacytoid dendritic cell	-0.916329	1	0.826	0.983	0	0
159950	Spinal Muscular Atrophy With Progressive Myoclonic Epilepsy	pulmonary ionocyte	-0.666301	1	0.858	0.983	0	0
159950	Spinal Muscular Atrophy With Progressive Myoclonic Epilepsy	respiratory goblet cell	0.207579	1	0.124	0.4712	0	0
159950	Spinal Muscular Atrophy With Progressive Myoclonic Epilepsy	respiratory mucous cell	-0.207611	1	0.374	0.983	0	0
159950	Spinal Muscular Atrophy With Progressive Myoclonic Epilepsy	serous cell of epithelium of bronchus	-0.342426	1	0.474	0.983	0	0
159950	Spinal Muscular Atrophy With Progressive Myoclonic Epilepsy	smooth muscle cell	-0.978468	1	0.897	0.983	0	0
159950	Spinal Muscular Atrophy With Progressive Myoclonic Epilepsy	type i pneumocyte	1.52898	1	0.073	0.312444	0	0
159950	Spinal Muscular Atrophy With Progressive Myoclonic Epilepsy	type ii pneumocyte	0.727052	1	0.07	0.312444	0	0
159950	Spinal Muscular Atrophy With Progressive Myoclonic Epilepsy	vascular associated smooth muscle cell	0.0325662	1	0.351	0.983	0	0
159950	Spinal Muscular Atrophy With Progressive Myoclonic Epilepsy	vein endothelial cell	-0.688214	1	0.972	0.983	0	0
170100	Prolidase Deficiency	cd8-positive, alpha-beta t cell	-0.425704	1	0.784	0.946743	0	0
170100	Prolidase Deficiency	cd4-positive, alpha-beta t cell	-0.500562	1	0.796	0.946743	0	0
170100	Prolidase Deficiency	adventitial cell	-0.0473193	1	0.419	0.8512	0	0
170100	Prolidase Deficiency	alveolar fibroblast	-0.159563	1	0.566	0.896167	0	0
170100	Prolidase Deficiency	b cell	-0.619534	1	0.784	0.946743	0	0
170100	Prolidase Deficiency	basal cell	-0.567582	1	0.957	0.957	0	0
170100	Prolidase Deficiency	basophil	0.307559	1	0.106	0.8512	0	0
170100	Prolidase Deficiency	bronchial smooth muscle cell	0.118487	1	0.269	0.8512	0	0
170100	Prolidase Deficiency	bronchial vessel endothelial cell	-0.0541292	1	0.443	0.8512	0	0
170100	Prolidase Deficiency	capillary aerocyte	0.164921	1	0.296	0.8512	0	0
170100	Prolidase Deficiency	capillary endothelial cell	-0.275702	1	0.73	0.946743	0	0
170100	Prolidase Deficiency	classical monocyte	0.241771	1	0.188	0.8512	0	0
170100	Prolidase Deficiency	club cell	-0.593058	1	0.946	0.957	0	0
170100	Prolidase Deficiency	dendritic cell	0.0531492	1	0.19	0.8512	0	0
170100	Prolidase Deficiency	endothelial cell of artery	1.11945	1	0.087	0.8512	0	0
170100	Prolidase Deficiency	endothelial cell of lymphatic vessel	5.08782	1	0.006	0.228	0	0
170100	Prolidase Deficiency	fibroblast	-0.743541	1	0.82	0.946743	0	0
170100	Prolidase Deficiency	intermediate monocyte	0.0902733	1	0.24	0.8512	0	0
170100	Prolidase Deficiency	lung ciliated cell	-0.536364	1	0.872	0.946743	0	0
170100	Prolidase Deficiency	lung microvascular endothelial cell	-0.105454	1	0.433	0.8512	0	0
170100	Prolidase Deficiency	macrophage	1.44345	1	0.037	0.703	0	0
170100	Prolidase Deficiency	mesothelial cell	-0.133117	1	0.434	0.8512	0	0
170100	Prolidase Deficiency	myofibroblast cell	-0.145891	1	0.511	0.882261	0	0
170100	Prolidase Deficiency	neutrophil	-1.20389	1	0.84	0.946743	0	0
170100	Prolidase Deficiency	nk cell	0.175876	1	0.332	0.8512	0	0
170100	Prolidase Deficiency	non-classical monocyte	0.305432	1	0.175	0.8512	0	0
170100	Prolidase Deficiency	pericyte cell	-0.321435	1	0.776	0.946743	0	0
170100	Prolidase Deficiency	plasma cell	-0.852782	1	0.668	0.946743	0	0
170100	Prolidase Deficiency	plasmacytoid dendritic cell	0.213834	1	0.238	0.8512	0	0
170100	Prolidase Deficiency	pulmonary ionocyte	0.0917755	1	0.382	0.8512	0	0
170100	Prolidase Deficiency	respiratory goblet cell	-0.722071	1	0.916	0.957	0	0
170100	Prolidase Deficiency	respiratory mucous cell	-1.14421	1	0.866	0.946743	0	0
170100	Prolidase Deficiency	serous cell of epithelium of bronchus	-0.392979	1	0.48	0.868571	0	0
170100	Prolidase Deficiency	smooth muscle cell	-0.14249	1	0.448	0.8512	0	0
170100	Prolidase Deficiency	type i pneumocyte	0.0153608	1	0.361	0.8512	0	0
170100	Prolidase Deficiency	type ii pneumocyte	-0.378933	1	0.688	0.946743	0	0
170100	Prolidase Deficiency	vascular associated smooth muscle cell	0.689355	1	0.149	0.8512	0	0
170100	Prolidase Deficiency	vein endothelial cell	-0.0522079	1	0.534	0.882261	0	0
173600	Pneumothorax, Primary Spontaneous	cd8-positive, alpha-beta t cell	-0.703876	1	0.922	0.962	0	0
173600	Pneumothorax, Primary Spontaneous	cd4-positive, alpha-beta t cell	-0.389112	1	0.702	0.962	0	0
173600	Pneumothorax, Primary Spontaneous	adventitial cell	1.07715	1	0.086	0.637556	0	0
173600	Pneumothorax, Primary Spontaneous	alveolar fibroblast	1.0869	1	0.094	0.637556	0	0
173600	Pneumothorax, Primary Spontaneous	b cell	-0.530032	1	0.672	0.962	0	0
173600	Pneumothorax, Primary Spontaneous	basal cell	-0.393637	1	0.848	0.962	0	0
173600	Pneumothorax, Primary Spontaneous	basophil	-0.187469	1	0.463	0.962	0	0
173600	Pneumothorax, Primary Spontaneous	bronchial smooth muscle cell	0.18603	1	0.254	0.795286	0	0
173600	Pneumothorax, Primary Spontaneous	bronchial vessel endothelial cell	-0.725029	1	0.895	0.962	0	0
173600	Pneumothorax, Primary Spontaneous	capillary aerocyte	-0.217225	1	0.622	0.962	0	0
173600	Pneumothorax, Primary Spontaneous	capillary endothelial cell	-0.329922	1	0.79	0.962	0	0
173600	Pneumothorax, Primary Spontaneous	classical monocyte	-0.123393	1	0.375	0.95	0	0
173600	Pneumothorax, Primary Spontaneous	club cell	0.0985828	1	0.26	0.795286	0	0
173600	Pneumothorax, Primary Spontaneous	dendritic cell	-0.804063	1	0.892	0.962	0	0
173600	Pneumothorax, Primary Spontaneous	endothelial cell of artery	-0.480339	1	0.851	0.962	0	0
173600	Pneumothorax, Primary Spontaneous	endothelial cell of lymphatic vessel	2.33333	1	0.064	0.637556	0	0
173600	Pneumothorax, Primary Spontaneous	fibroblast	1.79616	1	0.127	0.637556	0	0
173600	Pneumothorax, Primary Spontaneous	intermediate monocyte	-0.633253	1	0.841	0.962	0	0
173600	Pneumothorax, Primary Spontaneous	lung ciliated cell	1.22181	1	0.151	0.637556	0	0
173600	Pneumothorax, Primary Spontaneous	lung microvascular endothelial cell	-0.724888	1	0.962	0.962	0	0
173600	Pneumothorax, Primary Spontaneous	macrophage	-0.0605381	1	0.293	0.795286	0	0
173600	Pneumothorax, Primary Spontaneous	mesothelial cell	-0.313578	1	0.582	0.962	0	1
173600	Pneumothorax, Primary Spontaneous	myofibroblast cell	1.20541	1	0.145	0.637556	0	0
173600	Pneumothorax, Primary Spontaneous	neutrophil	1.89914	1	0.063	0.637556	0	0
173600	Pneumothorax, Primary Spontaneous	nk cell	-0.504838	1	0.833	0.962	0	0
173600	Pneumothorax, Primary Spontaneous	non-classical monocyte	0.373538	1	0.186	0.7068	0	0
173600	Pneumothorax, Primary Spontaneous	pericyte cell	-0.597929	1	0.916	0.962	0	0
173600	Pneumothorax, Primary Spontaneous	plasma cell	-1.00228	1	0.731	0.962	0	0
173600	Pneumothorax, Primary Spontaneous	plasmacytoid dendritic cell	-1.23377	1	0.91	0.962	0	0
173600	Pneumothorax, Primary Spontaneous	pulmonary ionocyte	0.557959	1	0.293	0.795286	0	0
173600	Pneumothorax, Primary Spontaneous	respiratory goblet cell	-0.742676	1	0.912	0.962	0	0
173600	Pneumothorax, Primary Spontaneous	respiratory mucous cell	-1.23377	1	0.888	0.962	0	0
173600	Pneumothorax, Primary Spontaneous	serous cell of epithelium of bronchus	-1.23377	1	0.899	0.962	0	0
173600	Pneumothorax, Primary Spontaneous	smooth muscle cell	-1.23377	1	0.939	0.962	0	0
173600	Pneumothorax, Primary Spontaneous	type i pneumocyte	2.40949	1	0.034	0.637556	0	0
173600	Pneumothorax, Primary Spontaneous	type ii pneumocyte	-0.126292	1	0.407	0.962	0	0
173600	Pneumothorax, Primary Spontaneous	vascular associated smooth muscle cell	0.882086	1	0.145	0.637556	0	0
173600	Pneumothorax, Primary Spontaneous	vein endothelial cell	-0.602154	1	0.96	0.962	0	0
175050	Juvenile Polyposis/hereditary Hemorrhagic Telangiectasia Syndrome	cd8-positive, alpha-beta t cell	-0.464746	1	0.815	0.998	0	0
175050	Juvenile Polyposis/hereditary Hemorrhagic Telangiectasia Syndrome	cd4-positive, alpha-beta t cell	-0.767847	1	0.922	0.998	0	0
175050	Juvenile Polyposis/hereditary Hemorrhagic Telangiectasia Syndrome	adventitial cell	-1.04395	1	0.955	0.998	0	0
175050	Juvenile Polyposis/hereditary Hemorrhagic Telangiectasia Syndrome	alveolar fibroblast	-0.247457	1	0.648	0.998	0	0
175050	Juvenile Polyposis/hereditary Hemorrhagic Telangiectasia Syndrome	b cell	0.179495	1	0.181	0.573167	0	0
175050	Juvenile Polyposis/hereditary Hemorrhagic Telangiectasia Syndrome	basal cell	0.20837	1	0.271	0.686533	0	0
175050	Juvenile Polyposis/hereditary Hemorrhagic Telangiectasia Syndrome	basophil	-1.22044	1	0.993	0.998	0	0
175050	Juvenile Polyposis/hereditary Hemorrhagic Telangiectasia Syndrome	bronchial smooth muscle cell	1.46005	1	0.062	0.537429	0	0
175050	Juvenile Polyposis/hereditary Hemorrhagic Telangiectasia Syndrome	bronchial vessel endothelial cell	-0.507689	1	0.803	0.998	0	0
175050	Juvenile Polyposis/hereditary Hemorrhagic Telangiectasia Syndrome	capillary aerocyte	1.39203	1	0.077	0.537429	0	0
175050	Juvenile Polyposis/hereditary Hemorrhagic Telangiectasia Syndrome	capillary endothelial cell	0.882582	1	0.135	0.573167	0	0
175050	Juvenile Polyposis/hereditary Hemorrhagic Telangiectasia Syndrome	classical monocyte	-0.249148	1	0.526	0.998	0	0
175050	Juvenile Polyposis/hereditary Hemorrhagic Telangiectasia Syndrome	club cell	1.24383	1	0.043	0.537429	0	0
175050	Juvenile Polyposis/hereditary Hemorrhagic Telangiectasia Syndrome	dendritic cell	-1.29062	1	0.996	0.998	0	0
175050	Juvenile Polyposis/hereditary Hemorrhagic Telangiectasia Syndrome	endothelial cell of artery	1.07944	1	0.099	0.537429	0	0
175050	Juvenile Polyposis/hereditary Hemorrhagic Telangiectasia Syndrome	endothelial cell of lymphatic vessel	0.943952	1	0.157	0.573167	0	0
175050	Juvenile Polyposis/hereditary Hemorrhagic Telangiectasia Syndrome	fibroblast	0.785923	1	0.255	0.686533	0	0
175050	Juvenile Polyposis/hereditary Hemorrhagic Telangiectasia Syndrome	intermediate monocyte	-0.130767	1	0.403	0.850778	0	0
175050	Juvenile Polyposis/hereditary Hemorrhagic Telangiectasia Syndrome	lung ciliated cell	0.430128	1	0.259	0.686533	0	0
175050	Juvenile Polyposis/hereditary Hemorrhagic Telangiectasia Syndrome	lung microvascular endothelial cell	-0.535225	1	0.887	0.998	0	0
175050	Juvenile Polyposis/hereditary Hemorrhagic Telangiectasia Syndrome	macrophage	-1.28301	1	0.998	0.998	0	0
175050	Juvenile Polyposis/hereditary Hemorrhagic Telangiectasia Syndrome	mesothelial cell	-0.526694	1	0.755	0.998	0	0
175050	Juvenile Polyposis/hereditary Hemorrhagic Telangiectasia Syndrome	myofibroblast cell	-0.358621	1	0.664	0.998	0	0
175050	Juvenile Polyposis/hereditary Hemorrhagic Telangiectasia Syndrome	neutrophil	-1.16975	1	0.835	0.998	0	0
175050	Juvenile Polyposis/hereditary Hemorrhagic Telangiectasia Syndrome	nk cell	1.76169	1	0.09	0.537429	0	0
175050	Juvenile Polyposis/hereditary Hemorrhagic Telangiectasia Syndrome	non-classical monocyte	-0.156096	1	0.477	0.954	0	0
175050	Juvenile Polyposis/hereditary Hemorrhagic Telangiectasia Syndrome	pericyte cell	1.84231	1	0.055	0.537429	0	0
175050	Juvenile Polyposis/hereditary Hemorrhagic Telangiectasia Syndrome	plasma cell	-1.79637	1	0.977	0.998	0	0
175050	Juvenile Polyposis/hereditary Hemorrhagic Telangiectasia Syndrome	plasmacytoid dendritic cell	0.910412	1	0.177	0.573167	0	0
175050	Juvenile Polyposis/hereditary Hemorrhagic Telangiectasia Syndrome	pulmonary ionocyte	0.252083	1	0.383	0.850778	0	0
175050	Juvenile Polyposis/hereditary Hemorrhagic Telangiectasia Syndrome	respiratory goblet cell	-0.337148	1	0.605	0.998	0	0
175050	Juvenile Polyposis/hereditary Hemorrhagic Telangiectasia Syndrome	respiratory mucous cell	-0.619264	1	0.652	0.998	0	0
175050	Juvenile Polyposis/hereditary Hemorrhagic Telangiectasia Syndrome	serous cell of epithelium of bronchus	-1.86509	1	0.99	0.998	0	0
175050	Juvenile Polyposis/hereditary Hemorrhagic Telangiectasia Syndrome	smooth muscle cell	-0.714052	1	0.802	0.998	0	0
175050	Juvenile Polyposis/hereditary Hemorrhagic Telangiectasia Syndrome	type i pneumocyte	0.802503	1	0.153	0.573167	0	0
175050	Juvenile Polyposis/hereditary Hemorrhagic Telangiectasia Syndrome	type ii pneumocyte	-0.510698	1	0.819	0.998	0	0
175050	Juvenile Polyposis/hereditary Hemorrhagic Telangiectasia Syndrome	vascular associated smooth muscle cell	1.57496	1	0.052	0.537429	0	0
175050	Juvenile Polyposis/hereditary Hemorrhagic Telangiectasia Syndrome	vein endothelial cell	0.0449083	1	0.326	0.77425	0	0
176270	Prader-willi Syndrome	cd8-positive, alpha-beta t cell	-0.240098	2	0.702	1	0	0
176270	Prader-willi Syndrome	cd4-positive, alpha-beta t cell	0.0386605	2	0.288	0.817	0	0
176270	Prader-willi Syndrome	adventitial cell	1.1991	2	0.037	0.499429	0	0
176270	Prader-willi Syndrome	alveolar fibroblast	0.650859	2	0.128	0.608	0	0
176270	Prader-willi Syndrome	b cell	-0.19255	2	0.437	0.922556	0	0
176270	Prader-willi Syndrome	basal cell	-0.0769975	2	0.587	1	0	0
176270	Prader-willi Syndrome	basophil	0.392205	2	0.082	0.499429	0	0
176270	Prader-willi Syndrome	bronchial smooth muscle cell	1.4507	2	0.029	0.499429	0	0
176270	Prader-willi Syndrome	bronchial vessel endothelial cell	-0.410428	2	0.786	1	0	0
176270	Prader-willi Syndrome	capillary aerocyte	-0.533335	2	0.944	1	0	0
176270	Prader-willi Syndrome	capillary endothelial cell	-0.525599	2	0.975	1	0	0
176270	Prader-willi Syndrome	classical monocyte	-1.08091	2	0.999	1	0	0
176270	Prader-willi Syndrome	club cell	-0.346356	2	0.832	1	0	0
176270	Prader-willi Syndrome	dendritic cell	-0.525119	2	0.821	1	0	0
176270	Prader-willi Syndrome	endothelial cell of artery	-0.384688	2	0.866	1	0	0
176270	Prader-willi Syndrome	endothelial cell of lymphatic vessel	1.28691	2	0.092	0.499429	0	0
176270	Prader-willi Syndrome	fibroblast	0.0846165	2	0.469	0.938	0	0
176270	Prader-willi Syndrome	intermediate monocyte	-1.0957	2	1	1	0	0
176270	Prader-willi Syndrome	lung ciliated cell	0.460687	2	0.291	0.817	0	0
176270	Prader-willi Syndrome	lung microvascular endothelial cell	-0.203591	2	0.606	1	0	0
176270	Prader-willi Syndrome	macrophage	-0.688627	2	0.915	1	0	0
176270	Prader-willi Syndrome	mesothelial cell	0.977762	2	0.051	0.499429	0	0
176270	Prader-willi Syndrome	myofibroblast cell	0.288512	2	0.344	0.817	0	0
176270	Prader-willi Syndrome	neutrophil	-1.15722	2	0.9	1	0	0
176270	Prader-willi Syndrome	nk cell	-0.218932	2	0.703	1	0	0
176270	Prader-willi Syndrome	non-classical monocyte	-0.852686	2	0.997	1	0	0
176270	Prader-willi Syndrome	pericyte cell	1.2782	2	0.061	0.499429	0	0
176270	Prader-willi Syndrome	plasma cell	-0.778821	2	0.649	1	0	0
176270	Prader-willi Syndrome	plasmacytoid dendritic cell	0.76375	2	0.186	0.7068	0	0
176270	Prader-willi Syndrome	pulmonary ionocyte	1.13543	2	0.163	0.688222	0	0
176270	Prader-willi Syndrome	respiratory goblet cell	-0.660181	2	0.95	1	0	0
176270	Prader-willi Syndrome	respiratory mucous cell	-0.215738	2	0.344	0.817	0	0
176270	Prader-willi Syndrome	serous cell of epithelium of bronchus	-0.703689	2	0.752	1	0	0
176270	Prader-willi Syndrome	smooth muscle cell	-0.0355613	2	0.372	0.831529	0	0
176270	Prader-willi Syndrome	type i pneumocyte	0.355296	2	0.278	0.817	0	0
176270	Prader-willi Syndrome	type ii pneumocyte	-0.0238324	2	0.327	0.817	0	0
176270	Prader-willi Syndrome	vascular associated smooth muscle cell	0.859416	2	0.084	0.499429	0	0
176270	Prader-willi Syndrome	vein endothelial cell	-0.271451	2	0.808	1	0	0
178500	Pulmonary Fibrosis, Idiopathic	cd8-positive, alpha-beta t cell	-0.200535	2	0.67	0.754865	0	0
178500	Pulmonary Fibrosis, Idiopathic	cd4-positive, alpha-beta t cell	-0.204706	2	0.552	0.754865	0	0
178500	Pulmonary Fibrosis, Idiopathic	adventitial cell	-0.218111	2	0.595	0.754865	0	0
178500	Pulmonary Fibrosis, Idiopathic	alveolar fibroblast	-0.218211	2	0.726	0.754865	0	1
178500	Pulmonary Fibrosis, Idiopathic	b cell	-0.245582	2	0.469	0.754865	0	0
178500	Pulmonary Fibrosis, Idiopathic	basal cell	-0.213665	2	0.784	0.784	0	0
178500	Pulmonary Fibrosis, Idiopathic	basophil	-0.239105	2	0.535	0.754865	0	0
178500	Pulmonary Fibrosis, Idiopathic	bronchial smooth muscle cell	-0.22827	2	0.61	0.754865	0	0
178500	Pulmonary Fibrosis, Idiopathic	bronchial vessel endothelial cell	-0.158768	2	0.517	0.754865	0	0
178500	Pulmonary Fibrosis, Idiopathic	capillary aerocyte	-0.193027	2	0.677	0.754865	0	0
178500	Pulmonary Fibrosis, Idiopathic	capillary endothelial cell	-0.200116	2	0.735	0.754865	0	0
178500	Pulmonary Fibrosis, Idiopathic	classical monocyte	-0.21703	2	0.55	0.754865	0	0
178500	Pulmonary Fibrosis, Idiopathic	club cell	0.0506508	2	0.335	0.754865	0	0
178500	Pulmonary Fibrosis, Idiopathic	dendritic cell	-0.242959	2	0.507	0.754865	0	0
178500	Pulmonary Fibrosis, Idiopathic	endothelial cell of artery	-0.21	2	0.719	0.754865	0	0
178500	Pulmonary Fibrosis, Idiopathic	endothelial cell of lymphatic vessel	-0.227116	2	0.641	0.754865	0	0
178500	Pulmonary Fibrosis, Idiopathic	fibroblast	0.148863	2	0.44	0.754865	0	1
178500	Pulmonary Fibrosis, Idiopathic	intermediate monocyte	-0.202605	2	0.54	0.754865	0	0
178500	Pulmonary Fibrosis, Idiopathic	lung ciliated cell	-0.149404	2	0.644	0.754865	0	0
178500	Pulmonary Fibrosis, Idiopathic	lung microvascular endothelial cell	-0.222024	2	0.653	0.754865	0	0
178500	Pulmonary Fibrosis, Idiopathic	macrophage	-0.254231	2	0.468	0.754865	0	0
178500	Pulmonary Fibrosis, Idiopathic	mesothelial cell	-0.262308	2	0.549	0.754865	0	0
178500	Pulmonary Fibrosis, Idiopathic	myofibroblast cell	-0.242648	2	0.652	0.754865	0	1
178500	Pulmonary Fibrosis, Idiopathic	neutrophil	-0.121981	2	0.28	0.754865	0	0
178500	Pulmonary Fibrosis, Idiopathic	nk cell	-0.189959	2	0.687	0.754865	0	0
178500	Pulmonary Fibrosis, Idiopathic	non-classical monocyte	-0.222352	2	0.625	0.754865	0	0
178500	Pulmonary Fibrosis, Idiopathic	pericyte cell	-0.175635	2	0.727	0.754865	0	0
178500	Pulmonary Fibrosis, Idiopathic	plasma cell	-0.21415	2	0.126	0.754865	0	0
178500	Pulmonary Fibrosis, Idiopathic	plasmacytoid dendritic cell	-0.266064	2	0.544	0.754865	0	0
178500	Pulmonary Fibrosis, Idiopathic	pulmonary ionocyte	-0.193937	2	0.667	0.754865	0	0
178500	Pulmonary Fibrosis, Idiopathic	respiratory goblet cell	0.660715	2	0.048	0.608	0	0
178500	Pulmonary Fibrosis, Idiopathic	respiratory mucous cell	2.79241	2	0	0	1	0
178500	Pulmonary Fibrosis, Idiopathic	serous cell of epithelium of bronchus	-0.233549	2	0.335	0.754865	0	0
178500	Pulmonary Fibrosis, Idiopathic	smooth muscle cell	-0.161739	2	0.443	0.754865	0	0
178500	Pulmonary Fibrosis, Idiopathic	type i pneumocyte	0.250519	2	0.336	0.754865	0	1
178500	Pulmonary Fibrosis, Idiopathic	type ii pneumocyte	2.85681	2	0.003	0.057	1	1
178500	Pulmonary Fibrosis, Idiopathic	vascular associated smooth muscle cell	-0.20785	2	0.648	0.754865	0	0
178500	Pulmonary Fibrosis, Idiopathic	vein endothelial cell	-0.222327	2	0.734	0.754865	0	0
PS178600	Pulmonary hypertension, primary	cd8-positive, alpha-beta t cell	-0.54929	1	0.871	0.871	0	0
PS178600	Pulmonary hypertension, primary	cd4-positive, alpha-beta t cell	-0.602556	1	0.87	0.871	0	0
PS178600	Pulmonary hypertension, primary	adventitial cell	-0.299106	1	0.641	0.871	0	1
PS178600	Pulmonary hypertension, primary	alveolar fibroblast	-0.261947	1	0.688	0.871	0	0
PS178600	Pulmonary hypertension, primary	b cell	-0.485562	1	0.668	0.871	0	0
PS178600	Pulmonary hypertension, primary	basal cell	-0.350854	1	0.827	0.871	0	0
PS178600	Pulmonary hypertension, primary	basophil	-0.580616	1	0.835	0.871	0	0
PS178600	Pulmonary hypertension, primary	bronchial smooth muscle cell	-0.0255162	1	0.414	0.871	0	0
PS178600	Pulmonary hypertension, primary	bronchial vessel endothelial cell	0.184206	1	0.25	0.871	0	0
PS178600	Pulmonary hypertension, primary	capillary aerocyte	2.62312	1	0.03	0.285	0	0
PS178600	Pulmonary hypertension, primary	capillary endothelial cell	3.23866	1	0.006	0.209	0	0
PS178600	Pulmonary hypertension, primary	classical monocyte	-0.518695	1	0.779	0.871	0	0
PS178600	Pulmonary hypertension, primary	club cell	-0.382105	1	0.799	0.871	0	0
PS178600	Pulmonary hypertension, primary	dendritic cell	-0.558655	1	0.774	0.871	0	0
PS178600	Pulmonary hypertension, primary	endothelial cell of artery	2.5606	1	0.017	0.215333	0	1
PS178600	Pulmonary hypertension, primary	endothelial cell of lymphatic vessel	-0.0673189	1	0.502	0.871	0	0
PS178600	Pulmonary hypertension, primary	fibroblast	0.887854	1	0.244	0.871	0	0
PS178600	Pulmonary hypertension, primary	intermediate monocyte	-0.552745	1	0.815	0.871	0	0
PS178600	Pulmonary hypertension, primary	lung ciliated cell	-0.442432	1	0.837	0.871	0	0
PS178600	Pulmonary hypertension, primary	lung microvascular endothelial cell	0.357646	1	0.144	0.871	0	1
PS178600	Pulmonary hypertension, primary	macrophage	-0.48813	1	0.692	0.871	0	0
PS178600	Pulmonary hypertension, primary	mesothelial cell	-0.517103	1	0.74	0.871	0	0
PS178600	Pulmonary hypertension, primary	myofibroblast cell	-0.133927	1	0.507	0.871	0	0
PS178600	Pulmonary hypertension, primary	neutrophil	-0.655592	1	0.637	0.871	0	0
PS178600	Pulmonary hypertension, primary	nk cell	-0.544243	1	0.846	0.871	0	0
PS178600	Pulmonary hypertension, primary	non-classical monocyte	-0.486977	1	0.845	0.871	0	0
PS178600	Pulmonary hypertension, primary	pericyte cell	0.515989	1	0.241	0.871	0	0
PS178600	Pulmonary hypertension, primary	plasma cell	-0.659604	1	0.552	0.871	0	0
PS178600	Pulmonary hypertension, primary	plasmacytoid dendritic cell	-0.638193	1	0.748	0.871	0	0
PS178600	Pulmonary hypertension, primary	pulmonary ionocyte	-0.523572	1	0.8	0.871	0	0
PS178600	Pulmonary hypertension, primary	respiratory goblet cell	-0.544896	1	0.796	0.871	0	0
PS178600	Pulmonary hypertension, primary	respiratory mucous cell	-0.673677	1	0.672	0.871	0	0
PS178600	Pulmonary hypertension, primary	serous cell of epithelium of bronchus	-0.608759	1	0.664	0.871	0	0
PS178600	Pulmonary hypertension, primary	smooth muscle cell	-0.0579574	1	0.393	0.871	0	1
PS178600	Pulmonary hypertension, primary	type i pneumocyte	0.0826728	1	0.342	0.871	0	0
PS178600	Pulmonary hypertension, primary	type ii pneumocyte	-0.528533	1	0.848	0.871	0	0
PS178600	Pulmonary hypertension, primary	vascular associated smooth muscle cell	0.0317833	1	0.329	0.871	0	1
PS178600	Pulmonary hypertension, primary	vein endothelial cell	2.25602	1	0.011	0.209	0	0
PS180849	Rubinstein-Taybi syndrome	cd8-positive, alpha-beta t cell	-0.0908037	1	0.531	0.88616	0	0
PS180849	Rubinstein-Taybi syndrome	cd4-positive, alpha-beta t cell	0.0737898	1	0.238	0.722	0	0
PS180849	Rubinstein-Taybi syndrome	adventitial cell	-0.213083	1	0.539	0.88616	0	0
PS180849	Rubinstein-Taybi syndrome	alveolar fibroblast	0.247995	1	0.242	0.722	0	0
PS180849	Rubinstein-Taybi syndrome	b cell	-0.155706	1	0.394	0.88616	0	0
PS180849	Rubinstein-Taybi syndrome	basal cell	-0.00641916	1	0.5	0.88616	0	0
PS180849	Rubinstein-Taybi syndrome	basophil	-0.680557	1	0.886	0.966	0	0
PS180849	Rubinstein-Taybi syndrome	bronchial smooth muscle cell	-0.108185	1	0.458	0.88616	0	0
PS180849	Rubinstein-Taybi syndrome	bronchial vessel endothelial cell	-0.319675	1	0.614	0.897385	0	0
PS180849	Rubinstein-Taybi syndrome	capillary aerocyte	0.30785	1	0.262	0.722	0	0
PS180849	Rubinstein-Taybi syndrome	capillary endothelial cell	0.394994	1	0.266	0.722	0	0
PS180849	Rubinstein-Taybi syndrome	classical monocyte	0.422714	1	0.15	0.722	0	0
PS180849	Rubinstein-Taybi syndrome	club cell	0.488768	1	0.122	0.722	0	0
PS180849	Rubinstein-Taybi syndrome	dendritic cell	-0.863601	1	0.914	0.966	0	0
PS180849	Rubinstein-Taybi syndrome	endothelial cell of artery	0.39125	1	0.223	0.722	0	0
PS180849	Rubinstein-Taybi syndrome	endothelial cell of lymphatic vessel	-0.0933369	1	0.502	0.88616	0	0
PS180849	Rubinstein-Taybi syndrome	fibroblast	-0.198211	1	0.57	0.88616	0	0
PS180849	Rubinstein-Taybi syndrome	intermediate monocyte	0.150047	1	0.219	0.722	0	0
PS180849	Rubinstein-Taybi syndrome	lung ciliated cell	-0.634723	1	0.916	0.966	0	0
PS180849	Rubinstein-Taybi syndrome	lung microvascular endothelial cell	-0.584431	1	0.898	0.966	0	0
PS180849	Rubinstein-Taybi syndrome	macrophage	-0.962754	1	0.966	0.966	0	0
PS180849	Rubinstein-Taybi syndrome	mesothelial cell	-0.31979	1	0.583	0.88616	0	0
PS180849	Rubinstein-Taybi syndrome	myofibroblast cell	3.46719	1	0.06	0.722	0	0
PS180849	Rubinstein-Taybi syndrome	neutrophil	2.96534	1	0.049	0.722	0	0
PS180849	Rubinstein-Taybi syndrome	nk cell	2.07406	1	0.083	0.722	0	0
PS180849	Rubinstein-Taybi syndrome	non-classical monocyte	0.135029	1	0.192	0.722	0	0
PS180849	Rubinstein-Taybi syndrome	pericyte cell	0.294043	1	0.325	0.823333	0	0
PS180849	Rubinstein-Taybi syndrome	plasma cell	-1.67371	1	0.956	0.966	0	0
PS180849	Rubinstein-Taybi syndrome	plasmacytoid dendritic cell	0.359673	1	0.221	0.722	0	0
PS180849	Rubinstein-Taybi syndrome	pulmonary ionocyte	-0.446078	1	0.769	0.966	0	0
PS180849	Rubinstein-Taybi syndrome	respiratory goblet cell	-0.756399	1	0.918	0.966	0	0
PS180849	Rubinstein-Taybi syndrome	respiratory mucous cell	-0.671919	1	0.696	0.966	0	0
PS180849	Rubinstein-Taybi syndrome	serous cell of epithelium of bronchus	-1.42903	1	0.953	0.966	0	0
PS180849	Rubinstein-Taybi syndrome	smooth muscle cell	-0.00184449	1	0.397	0.88616	0	0
PS180849	Rubinstein-Taybi syndrome	type i pneumocyte	-0.106271	1	0.568	0.88616	0	0
PS180849	Rubinstein-Taybi syndrome	type ii pneumocyte	-0.737854	1	0.934	0.966	0	0
PS180849	Rubinstein-Taybi syndrome	vascular associated smooth muscle cell	-0.923305	1	0.953	0.966	0	0
PS180849	Rubinstein-Taybi syndrome	vein endothelial cell	0.204934	1	0.256	0.722	0	0
181000	Sarcoidosis, Susceptibility To, 1	cd8-positive, alpha-beta t cell	-0.440581	1	0.814	0.927	0	0
181000	Sarcoidosis, Susceptibility To, 1	cd4-positive, alpha-beta t cell	-0.586549	1	0.86	0.927	0	0
181000	Sarcoidosis, Susceptibility To, 1	adventitial cell	-0.644982	1	0.841	0.927	0	0
181000	Sarcoidosis, Susceptibility To, 1	alveolar fibroblast	-0.600128	1	0.927	0.927	0	0
181000	Sarcoidosis, Susceptibility To, 1	b cell	0.467678	1	0.127	0.689429	0	0
181000	Sarcoidosis, Susceptibility To, 1	basal cell	-0.480973	1	0.907	0.927	0	0
181000	Sarcoidosis, Susceptibility To, 1	basophil	-0.558326	1	0.837	0.927	0	0
181000	Sarcoidosis, Susceptibility To, 1	bronchial smooth muscle cell	-0.626829	1	0.871	0.927	0	0
181000	Sarcoidosis, Susceptibility To, 1	bronchial vessel endothelial cell	0.343307	1	0.231	0.8778	0	0
181000	Sarcoidosis, Susceptibility To, 1	capillary aerocyte	0.737742	1	0.162	0.7695	0	0
181000	Sarcoidosis, Susceptibility To, 1	capillary endothelial cell	0.355794	1	0.258	0.891273	0	0
181000	Sarcoidosis, Susceptibility To, 1	classical monocyte	-0.275997	1	0.579	0.927	0	0
181000	Sarcoidosis, Susceptibility To, 1	club cell	-0.25623	1	0.68	0.927	0	0
181000	Sarcoidosis, Susceptibility To, 1	dendritic cell	4.60021	1	0.001	0.038	1	0
181000	Sarcoidosis, Susceptibility To, 1	endothelial cell of artery	0.0327646	1	0.336	0.927	0	0
181000	Sarcoidosis, Susceptibility To, 1	endothelial cell of lymphatic vessel	-0.605258	1	0.833	0.927	0	0
181000	Sarcoidosis, Susceptibility To, 1	fibroblast	-0.132664	1	0.519	0.927	0	0
181000	Sarcoidosis, Susceptibility To, 1	intermediate monocyte	0.505457	1	0.121	0.689429	0	0
181000	Sarcoidosis, Susceptibility To, 1	lung ciliated cell	-0.446565	1	0.81	0.927	0	0
181000	Sarcoidosis, Susceptibility To, 1	lung microvascular endothelial cell	0.711792	1	0.082	0.6232	0	0
181000	Sarcoidosis, Susceptibility To, 1	macrophage	2.28845	1	0.015	0.285	0	0
181000	Sarcoidosis, Susceptibility To, 1	mesothelial cell	-0.498049	1	0.72	0.927	0	0
181000	Sarcoidosis, Susceptibility To, 1	myofibroblast cell	-0.407034	1	0.705	0.927	0	0
181000	Sarcoidosis, Susceptibility To, 1	neutrophil	-0.725611	1	0.649	0.927	0	0
181000	Sarcoidosis, Susceptibility To, 1	nk cell	-0.657637	1	0.905	0.927	0	0
181000	Sarcoidosis, Susceptibility To, 1	non-classical monocyte	1.27627	1	0.055	0.6232	0	0
181000	Sarcoidosis, Susceptibility To, 1	pericyte cell	-0.55584	1	0.923	0.927	0	0
181000	Sarcoidosis, Susceptibility To, 1	plasma cell	-0.486007	1	0.432	0.927	0	0
181000	Sarcoidosis, Susceptibility To, 1	plasmacytoid dendritic cell	0.202942	1	0.226	0.8778	0	0
181000	Sarcoidosis, Susceptibility To, 1	pulmonary ionocyte	-0.580301	1	0.848	0.927	0	0
181000	Sarcoidosis, Susceptibility To, 1	respiratory goblet cell	-0.296499	1	0.524	0.927	0	0
181000	Sarcoidosis, Susceptibility To, 1	respiratory mucous cell	0.687337	1	0.079	0.6232	0	0
181000	Sarcoidosis, Susceptibility To, 1	serous cell of epithelium of bronchus	-0.525212	1	0.594	0.927	0	0
181000	Sarcoidosis, Susceptibility To, 1	smooth muscle cell	-0.704172	1	0.792	0.927	0	0
181000	Sarcoidosis, Susceptibility To, 1	type i pneumocyte	-0.448361	1	0.852	0.927	0	0
181000	Sarcoidosis, Susceptibility To, 1	type ii pneumocyte	-0.0850466	1	0.41	0.927	0	0
181000	Sarcoidosis, Susceptibility To, 1	vascular associated smooth muscle cell	-0.623269	1	0.871	0.927	0	0
181000	Sarcoidosis, Susceptibility To, 1	vein endothelial cell	0.0383751	1	0.318	0.927	0	0
184260	Osteochondrodysplasia	cd8-positive, alpha-beta t cell	0.0163731	1	0.348	0.647727	0	0
184260	Osteochondrodysplasia	cd4-positive, alpha-beta t cell	-0.402755	1	0.728	0.979	0	0
184260	Osteochondrodysplasia	adventitial cell	0.304129	1	0.205	0.591375	0	0
184260	Osteochondrodysplasia	alveolar fibroblast	0.588361	1	0.148	0.591375	0	0
184260	Osteochondrodysplasia	b cell	-0.915553	1	0.899	0.979	0	0
184260	Osteochondrodysplasia	basal cell	0.323513	1	0.228	0.591375	0	0
184260	Osteochondrodysplasia	basophil	-0.735074	1	0.906	0.979	0	0
184260	Osteochondrodysplasia	bronchial smooth muscle cell	0.186324	1	0.278	0.621412	0	0
184260	Osteochondrodysplasia	bronchial vessel endothelial cell	0.227494	1	0.249	0.591375	0	0
184260	Osteochondrodysplasia	capillary aerocyte	1.10549	1	0.114	0.591375	0	0
184260	Osteochondrodysplasia	capillary endothelial cell	0.907671	1	0.149	0.591375	0	0
184260	Osteochondrodysplasia	classical monocyte	-0.665486	1	0.867	0.979	0	0
184260	Osteochondrodysplasia	club cell	0.286304	1	0.197	0.591375	0	0
184260	Osteochondrodysplasia	dendritic cell	-1.14037	1	0.979	0.979	0	0
184260	Osteochondrodysplasia	endothelial cell of artery	0.388534	1	0.224	0.591375	0	0
184260	Osteochondrodysplasia	endothelial cell of lymphatic vessel	0.203476	1	0.308	0.634	0	0
184260	Osteochondrodysplasia	fibroblast	-1.09212	1	0.9	0.979	0	0
184260	Osteochondrodysplasia	intermediate monocyte	-0.970933	1	0.975	0.979	0	0
184260	Osteochondrodysplasia	lung ciliated cell	0.647782	1	0.204	0.591375	0	0
184260	Osteochondrodysplasia	lung microvascular endothelial cell	-0.111887	1	0.443	0.731913	0	0
184260	Osteochondrodysplasia	macrophage	-0.957567	1	0.967	0.979	0	0
184260	Osteochondrodysplasia	mesothelial cell	-0.593844	1	0.786	0.979	0	0
184260	Osteochondrodysplasia	myofibroblast cell	4.35132	1	0.021	0.591375	0	0
184260	Osteochondrodysplasia	neutrophil	-0.95272	1	0.765	0.979	0	0
184260	Osteochondrodysplasia	nk cell	0.946565	1	0.19	0.591375	0	0
184260	Osteochondrodysplasia	non-classical monocyte	-0.660063	1	0.934	0.979	0	0
184260	Osteochondrodysplasia	pericyte cell	1.21883	1	0.124	0.591375	0	0
184260	Osteochondrodysplasia	plasma cell	-1.083	1	0.775	0.979	0	0
184260	Osteochondrodysplasia	plasmacytoid dendritic cell	-0.865436	1	0.827	0.979	0	0
184260	Osteochondrodysplasia	pulmonary ionocyte	0.0619299	1	0.375	0.647727	0	0
184260	Osteochondrodysplasia	respiratory goblet cell	0.0192636	1	0.174	0.591375	0	0
184260	Osteochondrodysplasia	respiratory mucous cell	-1.14302	1	0.834	0.979	0	0
184260	Osteochondrodysplasia	serous cell of epithelium of bronchus	0.00357162	1	0.14	0.591375	0	0
184260	Osteochondrodysplasia	smooth muscle cell	-0.548538	1	0.733	0.979	0	0
184260	Osteochondrodysplasia	type i pneumocyte	0.839461	1	0.153	0.591375	0	0
184260	Osteochondrodysplasia	type ii pneumocyte	-0.00489772	1	0.359	0.647727	0	0
184260	Osteochondrodysplasia	vascular associated smooth muscle cell	0.0459503	1	0.317	0.634	0	0
184260	Osteochondrodysplasia	vein endothelial cell	0.170922	1	0.247	0.591375	0	0
185500	Supravalvular Aortic Stenosis	cd8-positive, alpha-beta t cell	-0.455756	1	0.827	0.858	0	0
185500	Supravalvular Aortic Stenosis	cd4-positive, alpha-beta t cell	-0.45339	1	0.749	0.858	0	0
185500	Supravalvular Aortic Stenosis	adventitial cell	1.84885	1	0.038	0.399	0	0
185500	Supravalvular Aortic Stenosis	alveolar fibroblast	3.2424	1	0.006	0.228	0	0
185500	Supravalvular Aortic Stenosis	b cell	-0.458427	1	0.655	0.858	0	0
185500	Supravalvular Aortic Stenosis	basal cell	-0.296295	1	0.764	0.858	0	0
185500	Supravalvular Aortic Stenosis	basophil	-0.453371	1	0.683	0.858	0	0
185500	Supravalvular Aortic Stenosis	bronchial smooth muscle cell	1.65366	1	0.041	0.399	0	0
185500	Supravalvular Aortic Stenosis	bronchial vessel endothelial cell	-0.438441	1	0.767	0.858	0	0
185500	Supravalvular Aortic Stenosis	capillary aerocyte	-0.384285	1	0.789	0.858	0	0
185500	Supravalvular Aortic Stenosis	capillary endothelial cell	-0.358384	1	0.812	0.858	0	0
185500	Supravalvular Aortic Stenosis	classical monocyte	-0.45386	1	0.734	0.858	0	0
185500	Supravalvular Aortic Stenosis	club cell	-0.455149	1	0.858	0.858	0	0
185500	Supravalvular Aortic Stenosis	dendritic cell	-0.458427	1	0.709	0.858	0	0
185500	Supravalvular Aortic Stenosis	endothelial cell of artery	-0.134162	1	0.541	0.858	0	0
185500	Supravalvular Aortic Stenosis	endothelial cell of lymphatic vessel	0.164181	1	0.316	0.858	0	0
185500	Supravalvular Aortic Stenosis	fibroblast	3.17042	1	0.058	0.4408	0	0
185500	Supravalvular Aortic Stenosis	intermediate monocyte	-0.446824	1	0.738	0.858	0	0
185500	Supravalvular Aortic Stenosis	lung ciliated cell	-0.444154	1	0.797	0.858	0	0
185500	Supravalvular Aortic Stenosis	lung microvascular endothelial cell	-0.363047	1	0.746	0.858	0	0
185500	Supravalvular Aortic Stenosis	macrophage	-0.456714	1	0.653	0.858	0	0
185500	Supravalvular Aortic Stenosis	mesothelial cell	-0.351333	1	0.598	0.858	0	0
185500	Supravalvular Aortic Stenosis	myofibroblast cell	0.155379	1	0.331	0.858	0	0
185500	Supravalvular Aortic Stenosis	neutrophil	-0.428395	1	0.527	0.858	0	0
185500	Supravalvular Aortic Stenosis	nk cell	-0.442041	1	0.78	0.858	0	0
185500	Supravalvular Aortic Stenosis	non-classical monocyte	-0.45489	1	0.807	0.858	0	0
185500	Supravalvular Aortic Stenosis	pericyte cell	-0.346158	1	0.814	0.858	0	0
185500	Supravalvular Aortic Stenosis	plasma cell	-0.458427	1	0.443	0.858	0	0
185500	Supravalvular Aortic Stenosis	plasmacytoid dendritic cell	-0.458427	1	0.636	0.858	0	0
185500	Supravalvular Aortic Stenosis	pulmonary ionocyte	-0.458427	1	0.796	0.858	0	0
185500	Supravalvular Aortic Stenosis	respiratory goblet cell	-0.449861	1	0.705	0.858	0	0
185500	Supravalvular Aortic Stenosis	respiratory mucous cell	-0.458427	1	0.558	0.858	0	0
185500	Supravalvular Aortic Stenosis	serous cell of epithelium of bronchus	-0.440612	1	0.524	0.858	0	0
185500	Supravalvular Aortic Stenosis	smooth muscle cell	-0.175636	1	0.432	0.858	0	1
185500	Supravalvular Aortic Stenosis	type i pneumocyte	-0.448594	1	0.852	0.858	0	0
185500	Supravalvular Aortic Stenosis	type ii pneumocyte	-0.451997	1	0.76	0.858	0	0
185500	Supravalvular Aortic Stenosis	vascular associated smooth muscle cell	2.22468	1	0.042	0.399	0	1
185500	Supravalvular Aortic Stenosis	vein endothelial cell	-0.125662	1	0.571	0.858	0	0
PS187300	Telangiectasia, hereditary hemorrhagic	cd8-positive, alpha-beta t cell	-0.513853	2	0.928	0.952	0	0
PS187300	Telangiectasia, hereditary hemorrhagic	cd4-positive, alpha-beta t cell	-0.517945	2	0.887	0.952	0	0
PS187300	Telangiectasia, hereditary hemorrhagic	adventitial cell	-0.132655	2	0.486	0.952	0	1
PS187300	Telangiectasia, hereditary hemorrhagic	alveolar fibroblast	-0.17973	2	0.671	0.952	0	0
PS187300	Telangiectasia, hereditary hemorrhagic	b cell	-0.278196	2	0.515	0.952	0	0
PS187300	Telangiectasia, hereditary hemorrhagic	basal cell	-0.430349	2	0.952	0.952	0	0
PS187300	Telangiectasia, hereditary hemorrhagic	basophil	-0.482393	2	0.817	0.952	0	0
PS187300	Telangiectasia, hereditary hemorrhagic	bronchial smooth muscle cell	-0.264643	2	0.66	0.952	0	0
PS187300	Telangiectasia, hereditary hemorrhagic	bronchial vessel endothelial cell	0.820581	2	0.091	0.576333	0	0
PS187300	Telangiectasia, hereditary hemorrhagic	capillary aerocyte	2.97017	2	0	0	1	0
PS187300	Telangiectasia, hereditary hemorrhagic	capillary endothelial cell	2.9145	2	0	0	1	0
PS187300	Telangiectasia, hereditary hemorrhagic	classical monocyte	-0.487124	2	0.843	0.952	0	0
PS187300	Telangiectasia, hereditary hemorrhagic	club cell	-0.45894	2	0.936	0.952	0	0
PS187300	Telangiectasia, hereditary hemorrhagic	dendritic cell	-0.322994	2	0.603	0.952	0	0
PS187300	Telangiectasia, hereditary hemorrhagic	endothelial cell of artery	2.3749	2	0.001	0.0126667	1	1
PS187300	Telangiectasia, hereditary hemorrhagic	endothelial cell of lymphatic vessel	-0.159978	2	0.628	0.952	0	0
PS187300	Telangiectasia, hereditary hemorrhagic	fibroblast	0.749202	2	0.244	0.952	0	0
PS187300	Telangiectasia, hereditary hemorrhagic	intermediate monocyte	-0.466269	2	0.846	0.952	0	0
PS187300	Telangiectasia, hereditary hemorrhagic	lung ciliated cell	-0.501048	2	0.933	0.952	0	0
PS187300	Telangiectasia, hereditary hemorrhagic	lung microvascular endothelial cell	0.977358	2	0.033	0.2508	0	0
PS187300	Telangiectasia, hereditary hemorrhagic	macrophage	-0.23916	2	0.407	0.952	0	0
PS187300	Telangiectasia, hereditary hemorrhagic	mesothelial cell	-0.452437	2	0.705	0.952	0	0
PS187300	Telangiectasia, hereditary hemorrhagic	myofibroblast cell	-0.388987	2	0.758	0.952	0	0
PS187300	Telangiectasia, hereditary hemorrhagic	neutrophil	-0.526684	2	0.58	0.952	0	0
PS187300	Telangiectasia, hereditary hemorrhagic	nk cell	-0.520324	2	0.925	0.952	0	0
PS187300	Telangiectasia, hereditary hemorrhagic	non-classical monocyte	-0.405348	2	0.843	0.952	0	0
PS187300	Telangiectasia, hereditary hemorrhagic	pericyte cell	0.0370885	2	0.51	0.952	0	1
PS187300	Telangiectasia, hereditary hemorrhagic	plasma cell	-0.533678	2	0.417	0.952	0	0
PS187300	Telangiectasia, hereditary hemorrhagic	plasmacytoid dendritic cell	-0.560649	2	0.751	0.952	0	0
PS187300	Telangiectasia, hereditary hemorrhagic	pulmonary ionocyte	-0.478065	2	0.872	0.952	0	0
PS187300	Telangiectasia, hereditary hemorrhagic	respiratory goblet cell	-0.511507	2	0.858	0.952	0	0
PS187300	Telangiectasia, hereditary hemorrhagic	respiratory mucous cell	-0.560649	2	0.618	0.952	0	0
PS187300	Telangiectasia, hereditary hemorrhagic	serous cell of epithelium of bronchus	-0.546744	2	0.608	0.952	0	0
PS187300	Telangiectasia, hereditary hemorrhagic	smooth muscle cell	-0.357532	2	0.628	0.952	0	0
PS187300	Telangiectasia, hereditary hemorrhagic	type i pneumocyte	-0.507381	2	0.945	0.952	0	0
PS187300	Telangiectasia, hereditary hemorrhagic	type ii pneumocyte	-0.51609	2	0.893	0.952	0	0
PS187300	Telangiectasia, hereditary hemorrhagic	vascular associated smooth muscle cell	-0.232482	2	0.668	0.952	0	1
PS187300	Telangiectasia, hereditary hemorrhagic	vein endothelial cell	1.69004	2	0.009	0.0855	1	1
PS191100	Tuberous sclerosis	cd8-positive, alpha-beta t cell	0.0938883	3	0.242	0.829667	0	0
PS191100	Tuberous sclerosis	cd4-positive, alpha-beta t cell	-0.243365	3	0.593	0.876235	0	0
PS191100	Tuberous sclerosis	adventitial cell	-0.325068	3	0.721	0.876235	0	0
PS191100	Tuberous sclerosis	alveolar fibroblast	0.11682	3	0.226	0.829667	0	0
PS191100	Tuberous sclerosis	b cell	-0.279087	3	0.486	0.876235	0	0
PS191100	Tuberous sclerosis	basal cell	0.118995	3	0.255	0.829667	0	0
PS191100	Tuberous sclerosis	basophil	-0.484351	3	0.833	0.879278	0	0
PS191100	Tuberous sclerosis	bronchial smooth muscle cell	0.234241	3	0.149	0.829667	0	0
PS191100	Tuberous sclerosis	bronchial vessel endothelial cell	-0.220715	3	0.557	0.876235	0	0
PS191100	Tuberous sclerosis	capillary aerocyte	0.130436	3	0.246	0.829667	0	0
PS191100	Tuberous sclerosis	capillary endothelial cell	0.0935896	3	0.293	0.856462	0	0
PS191100	Tuberous sclerosis	classical monocyte	-0.245523	3	0.527	0.876235	0	0
PS191100	Tuberous sclerosis	club cell	-0.073427	3	0.469	0.876235	0	0
PS191100	Tuberous sclerosis	dendritic cell	-0.591968	3	0.882	0.882	0	0
PS191100	Tuberous sclerosis	endothelial cell of artery	-0.279087	3	0.784	0.876235	0	0
PS191100	Tuberous sclerosis	endothelial cell of lymphatic vessel	0.880053	3	0.084	0.829667	0	0
PS191100	Tuberous sclerosis	fibroblast	0.784052	3	0.135	0.829667	0	0
PS191100	Tuberous sclerosis	intermediate monocyte	-0.151478	3	0.437	0.876235	0	0
PS191100	Tuberous sclerosis	lung ciliated cell	0.24115	3	0.247	0.829667	0	0
PS191100	Tuberous sclerosis	lung microvascular endothelial cell	-0.167278	3	0.522	0.876235	0	0
PS191100	Tuberous sclerosis	macrophage	-0.483962	3	0.779	0.876235	0	0
PS191100	Tuberous sclerosis	mesothelial cell	-0.472491	3	0.758	0.876235	0	0
PS191100	Tuberous sclerosis	myofibroblast cell	-0.279087	3	0.685	0.876235	0	0
PS191100	Tuberous sclerosis	neutrophil	-0.484907	3	0.567	0.876235	0	0
PS191100	Tuberous sclerosis	nk cell	0.863438	3	0.095	0.829667	0	0
PS191100	Tuberous sclerosis	non-classical monocyte	-0.258407	3	0.653	0.876235	0	0
PS191100	Tuberous sclerosis	pericyte cell	0.217443	3	0.262	0.829667	0	0
PS191100	Tuberous sclerosis	plasma cell	-0.870773	3	0.733	0.876235	0	0
PS191100	Tuberous sclerosis	plasmacytoid dendritic cell	-0.679289	3	0.82	0.879278	0	0
PS191100	Tuberous sclerosis	pulmonary ionocyte	-0.279087	3	0.706	0.876235	0	0
PS191100	Tuberous sclerosis	respiratory goblet cell	-0.279087	3	0.55	0.876235	0	0
PS191100	Tuberous sclerosis	respiratory mucous cell	-0.574432	3	0.669	0.876235	0	0
PS191100	Tuberous sclerosis	serous cell of epithelium of bronchus	-0.848175	3	0.858	0.881189	0	0
PS191100	Tuberous sclerosis	smooth muscle cell	-0.279087	3	0.561	0.876235	0	1
PS191100	Tuberous sclerosis	type i pneumocyte	0.827905	3	0.052	0.829667	0	0
PS191100	Tuberous sclerosis	type ii pneumocyte	-0.273833	3	0.647	0.876235	0	1
PS191100	Tuberous sclerosis	vascular associated smooth muscle cell	0.0190671	3	0.247	0.829667	0	0
PS191100	Tuberous sclerosis	vein endothelial cell	-0.173612	3	0.637	0.876235	0	0
PS191830	Renal hypodysplasia/aplasia	cd8-positive, alpha-beta t cell	-0.38286	1	0.76	0.825444	0	0
PS191830	Renal hypodysplasia/aplasia	cd4-positive, alpha-beta t cell	-0.38286	1	0.702	0.825444	0	0
PS191830	Renal hypodysplasia/aplasia	adventitial cell	-0.119439	1	0.458	0.825444	0	0
PS191830	Renal hypodysplasia/aplasia	alveolar fibroblast	3.52461	1	0.009	0.342	0	0
PS191830	Renal hypodysplasia/aplasia	b cell	-0.38286	1	0.595	0.825444	0	0
PS191830	Renal hypodysplasia/aplasia	basal cell	-0.37961	1	0.838	0.838	0	0
PS191830	Renal hypodysplasia/aplasia	basophil	-0.38286	1	0.652	0.825444	0	0
PS191830	Renal hypodysplasia/aplasia	bronchial smooth muscle cell	2.44144	1	0.029	0.4845	0	0
PS191830	Renal hypodysplasia/aplasia	bronchial vessel endothelial cell	-0.363767	1	0.682	0.825444	0	0
PS191830	Renal hypodysplasia/aplasia	capillary aerocyte	-0.365271	1	0.758	0.825444	0	0
PS191830	Renal hypodysplasia/aplasia	capillary endothelial cell	-0.330077	1	0.782	0.825444	0	0
PS191830	Renal hypodysplasia/aplasia	classical monocyte	-0.381981	1	0.641	0.825444	0	0
PS191830	Renal hypodysplasia/aplasia	club cell	-0.373496	1	0.807	0.828811	0	0
PS191830	Renal hypodysplasia/aplasia	dendritic cell	-0.38286	1	0.603	0.825444	0	0
PS191830	Renal hypodysplasia/aplasia	endothelial cell of artery	-0.31712	1	0.714	0.825444	0	0
PS191830	Renal hypodysplasia/aplasia	endothelial cell of lymphatic vessel	-0.38286	1	0.71	0.825444	0	0
PS191830	Renal hypodysplasia/aplasia	fibroblast	3.31086	1	0.043	0.4845	0	0
PS191830	Renal hypodysplasia/aplasia	intermediate monocyte	-0.38286	1	0.657	0.825444	0	0
PS191830	Renal hypodysplasia/aplasia	lung ciliated cell	-0.37829	1	0.754	0.825444	0	0
PS191830	Renal hypodysplasia/aplasia	lung microvascular endothelial cell	-0.342252	1	0.712	0.825444	0	0
PS191830	Renal hypodysplasia/aplasia	macrophage	-0.380848	1	0.597	0.825444	0	0
PS191830	Renal hypodysplasia/aplasia	mesothelial cell	-0.38286	1	0.645	0.825444	0	0
PS191830	Renal hypodysplasia/aplasia	myofibroblast cell	0.37366	1	0.27	0.825444	0	0
PS191830	Renal hypodysplasia/aplasia	neutrophil	-0.327561	1	0.419	0.825444	0	0
PS191830	Renal hypodysplasia/aplasia	nk cell	-0.38286	1	0.758	0.825444	0	0
PS191830	Renal hypodysplasia/aplasia	non-classical monocyte	-0.380198	1	0.723	0.825444	0	0
PS191830	Renal hypodysplasia/aplasia	pericyte cell	1.83868	1	0.051	0.4845	0	0
PS191830	Renal hypodysplasia/aplasia	plasma cell	-0.226988	1	0.24	0.825444	0	0
PS191830	Renal hypodysplasia/aplasia	plasmacytoid dendritic cell	-0.38286	1	0.564	0.825444	0	0
PS191830	Renal hypodysplasia/aplasia	pulmonary ionocyte	-0.38286	1	0.707	0.825444	0	0
PS191830	Renal hypodysplasia/aplasia	respiratory goblet cell	-0.37936	1	0.625	0.825444	0	0
PS191830	Renal hypodysplasia/aplasia	respiratory mucous cell	-0.38286	1	0.489	0.825444	0	0
PS191830	Renal hypodysplasia/aplasia	serous cell of epithelium of bronchus	-0.38286	1	0.471	0.825444	0	0
PS191830	Renal hypodysplasia/aplasia	smooth muscle cell	-0.180179	1	0.445	0.825444	0	0
PS191830	Renal hypodysplasia/aplasia	type i pneumocyte	-0.353993	1	0.78	0.825444	0	0
PS191830	Renal hypodysplasia/aplasia	type ii pneumocyte	-0.379	1	0.706	0.825444	0	0
PS191830	Renal hypodysplasia/aplasia	vascular associated smooth muscle cell	-0.237587	1	0.583	0.825444	0	0
PS191830	Renal hypodysplasia/aplasia	vein endothelial cell	-0.315061	1	0.735	0.825444	0	0
192430	Velocardiofacial Syndrome	cd8-positive, alpha-beta t cell	-0.198551	1	0.616	0.663	0	0
192430	Velocardiofacial Syndrome	cd4-positive, alpha-beta t cell	-0.217846	1	0.536	0.663	0	1
192430	Velocardiofacial Syndrome	adventitial cell	-0.22538	1	0.552	0.663	0	0
192430	Velocardiofacial Syndrome	alveolar fibroblast	-0.200093	1	0.622	0.663	0	0
192430	Velocardiofacial Syndrome	b cell	-0.22538	1	0.419	0.663	0	0
192430	Velocardiofacial Syndrome	basal cell	0.0277512	1	0.377	0.663	0	0
192430	Velocardiofacial Syndrome	basophil	-0.143409	1	0.403	0.663	0	0
192430	Velocardiofacial Syndrome	bronchial smooth muscle cell	-0.16319	1	0.495	0.663	0	0
192430	Velocardiofacial Syndrome	bronchial vessel endothelial cell	-0.211346	1	0.535	0.663	0	0
192430	Velocardiofacial Syndrome	capillary aerocyte	-0.209849	1	0.629	0.663	0	0
192430	Velocardiofacial Syndrome	capillary endothelial cell	-0.202897	1	0.661	0.663	0	0
192430	Velocardiofacial Syndrome	classical monocyte	-0.218488	1	0.491	0.663	0	0
192430	Velocardiofacial Syndrome	club cell	-0.052056	1	0.466	0.663	0	0
192430	Velocardiofacial Syndrome	dendritic cell	-0.220355	1	0.457	0.663	0	0
192430	Velocardiofacial Syndrome	endothelial cell of artery	-0.22538	1	0.624	0.663	0	0
192430	Velocardiofacial Syndrome	endothelial cell of lymphatic vessel	5.92289	1	0.003	0.114	0	0
192430	Velocardiofacial Syndrome	fibroblast	-0.22538	1	0.576	0.663	0	0
192430	Velocardiofacial Syndrome	intermediate monocyte	-0.22538	1	0.515	0.663	0	0
192430	Velocardiofacial Syndrome	lung ciliated cell	-0.0225986	1	0.503	0.663	0	0
192430	Velocardiofacial Syndrome	lung microvascular endothelial cell	-0.201213	1	0.544	0.663	0	0
192430	Velocardiofacial Syndrome	macrophage	-0.210055	1	0.419	0.663	0	0
192430	Velocardiofacial Syndrome	mesothelial cell	-0.202716	1	0.462	0.663	0	0
192430	Velocardiofacial Syndrome	myofibroblast cell	-0.22538	1	0.557	0.663	0	0
192430	Velocardiofacial Syndrome	neutrophil	-0.22538	1	0.372	0.663	0	0
192430	Velocardiofacial Syndrome	nk cell	-0.193113	1	0.601	0.663	0	0
192430	Velocardiofacial Syndrome	non-classical monocyte	-0.216451	1	0.543	0.663	0	0
192430	Velocardiofacial Syndrome	pericyte cell	-0.205776	1	0.663	0.663	0	0
192430	Velocardiofacial Syndrome	plasma cell	-0.22538	1	0.226	0.663	0	0
192430	Velocardiofacial Syndrome	plasmacytoid dendritic cell	-0.22538	1	0.477	0.663	0	0
192430	Velocardiofacial Syndrome	pulmonary ionocyte	0.737035	1	0.229	0.663	0	0
192430	Velocardiofacial Syndrome	respiratory goblet cell	-0.0668971	1	0.315	0.663	0	0
192430	Velocardiofacial Syndrome	respiratory mucous cell	-0.122873	1	0.302	0.663	0	0
192430	Velocardiofacial Syndrome	serous cell of epithelium of bronchus	-0.102291	1	0.294	0.663	0	0
192430	Velocardiofacial Syndrome	smooth muscle cell	-0.22538	1	0.498	0.663	0	0
192430	Velocardiofacial Syndrome	type i pneumocyte	-0.203586	1	0.65	0.663	0	0
192430	Velocardiofacial Syndrome	type ii pneumocyte	-0.206712	1	0.521	0.663	0	0
192430	Velocardiofacial Syndrome	vascular associated smooth muscle cell	-0.22538	1	0.608	0.663	0	0
192430	Velocardiofacial Syndrome	vein endothelial cell	-0.216139	1	0.619	0.663	0	0
193300	Von Hippel-lindau Syndrome	cd8-positive, alpha-beta t cell	0.598662	2	0.164	0.613846	0	0
193300	Von Hippel-lindau Syndrome	cd4-positive, alpha-beta t cell	0.0989513	2	0.258	0.665	0	0
193300	Von Hippel-lindau Syndrome	adventitial cell	-0.999393	2	0.996	0.998	0	1
193300	Von Hippel-lindau Syndrome	alveolar fibroblast	-0.325482	2	0.817	0.998	0	0
193300	Von Hippel-lindau Syndrome	b cell	-0.0177433	2	0.265	0.665	0	0
193300	Von Hippel-lindau Syndrome	basal cell	1.24091	2	0.036	0.589	0	0
193300	Von Hippel-lindau Syndrome	basophil	-0.155821	2	0.437	0.754818	0	0
193300	Von Hippel-lindau Syndrome	bronchial smooth muscle cell	-0.215299	2	0.585	0.823333	0	0
193300	Von Hippel-lindau Syndrome	bronchial vessel endothelial cell	-0.781227	2	0.973	0.998	0	0
193300	Von Hippel-lindau Syndrome	capillary aerocyte	1.29048	2	0.044	0.589	0	0
193300	Von Hippel-lindau Syndrome	capillary endothelial cell	0.706611	2	0.133	0.613846	0	0
193300	Von Hippel-lindau Syndrome	classical monocyte	0.233441	2	0.196	0.613846	0	0
193300	Von Hippel-lindau Syndrome	club cell	0.274989	2	0.207	0.613846	0	0
193300	Von Hippel-lindau Syndrome	dendritic cell	0.165103	2	0.164	0.613846	0	0
193300	Von Hippel-lindau Syndrome	endothelial cell of artery	0.283536	2	0.28	0.665	0	0
193300	Von Hippel-lindau Syndrome	endothelial cell of lymphatic vessel	1.02635	2	0.135	0.613846	0	0
193300	Von Hippel-lindau Syndrome	fibroblast	-0.488525	2	0.779	0.998	0	0
193300	Von Hippel-lindau Syndrome	intermediate monocyte	0.351018	2	0.174	0.613846	0	0
193300	Von Hippel-lindau Syndrome	lung ciliated cell	0.0891188	2	0.468	0.773217	0	0
193300	Von Hippel-lindau Syndrome	lung microvascular endothelial cell	-0.631676	2	0.97	0.998	0	0
193300	Von Hippel-lindau Syndrome	macrophage	-0.706889	2	0.943	0.998	0	0
193300	Von Hippel-lindau Syndrome	mesothelial cell	-1.26333	2	0.998	0.998	0	0
193300	Von Hippel-lindau Syndrome	myofibroblast cell	-0.0984357	2	0.513	0.81225	0	0
193300	Von Hippel-lindau Syndrome	neutrophil	-0.365019	2	0.431	0.754818	0	0
193300	Von Hippel-lindau Syndrome	nk cell	0.361761	2	0.348	0.696	0	0
193300	Von Hippel-lindau Syndrome	non-classical monocyte	0.282913	2	0.21	0.613846	0	0
193300	Von Hippel-lindau Syndrome	pericyte cell	-0.0184295	2	0.541	0.817	0	1
193300	Von Hippel-lindau Syndrome	plasma cell	-1.12863	2	0.86	0.998	0	0
193300	Von Hippel-lindau Syndrome	plasmacytoid dendritic cell	-0.910714	2	0.899	0.998	0	0
193300	Von Hippel-lindau Syndrome	pulmonary ionocyte	0.715825	2	0.312	0.692444	0	0
193300	Von Hippel-lindau Syndrome	respiratory goblet cell	0.607836	2	0.047	0.589	0	0
193300	Von Hippel-lindau Syndrome	respiratory mucous cell	0.650843	2	0.062	0.589	0	0
193300	Von Hippel-lindau Syndrome	serous cell of epithelium of bronchus	-0.479684	2	0.559	0.817	0	0
193300	Von Hippel-lindau Syndrome	smooth muscle cell	0.0279945	2	0.328	0.692444	0	0
193300	Von Hippel-lindau Syndrome	type i pneumocyte	0.19517	2	0.383	0.7277	0	0
193300	Von Hippel-lindau Syndrome	type ii pneumocyte	0.379229	2	0.132	0.613846	0	0
193300	Von Hippel-lindau Syndrome	vascular associated smooth muscle cell	-0.446759	2	0.859	0.998	0	0
193300	Von Hippel-lindau Syndrome	vein endothelial cell	-0.547675	2	0.981	0.998	0	0
193670	Whim Syndrome	cd8-positive, alpha-beta t cell	2.41741	1	0.014	0.177333	0	0
193670	Whim Syndrome	cd4-positive, alpha-beta t cell	3.16108	1	0.003	0.114	0	0
193670	Whim Syndrome	adventitial cell	-0.558189	1	0.796	0.930486	0	0
193670	Whim Syndrome	alveolar fibroblast	-0.485812	1	0.839	0.930486	0	0
193670	Whim Syndrome	b cell	2.70227	1	0.014	0.177333	0	0
193670	Whim Syndrome	basal cell	-0.513296	1	0.935	0.935	0	0
193670	Whim Syndrome	basophil	-0.498639	1	0.751	0.930486	0	0
193670	Whim Syndrome	bronchial smooth muscle cell	-0.502725	1	0.784	0.930486	0	0
193670	Whim Syndrome	bronchial vessel endothelial cell	-0.472921	1	0.771	0.930486	0	0
193670	Whim Syndrome	capillary aerocyte	-0.510099	1	0.871	0.930486	0	0
193670	Whim Syndrome	capillary endothelial cell	-0.530304	1	0.906	0.930486	0	0
193670	Whim Syndrome	classical monocyte	-0.0862855	1	0.4	0.930486	0	0
193670	Whim Syndrome	club cell	-0.494683	1	0.886	0.930486	0	0
193670	Whim Syndrome	dendritic cell	0.794969	1	0.064	0.582667	0	0
193670	Whim Syndrome	endothelial cell of artery	-0.531938	1	0.888	0.930486	0	0
193670	Whim Syndrome	endothelial cell of lymphatic vessel	-0.565923	1	0.812	0.930486	0	0
193670	Whim Syndrome	fibroblast	-0.503456	1	0.731	0.930486	0	0
193670	Whim Syndrome	intermediate monocyte	0.113792	1	0.221	0.8816	0	0
193670	Whim Syndrome	lung ciliated cell	-0.509671	1	0.866	0.930486	0	0
193670	Whim Syndrome	lung microvascular endothelial cell	-0.537887	1	0.904	0.930486	0	0
193670	Whim Syndrome	macrophage	-0.333304	1	0.522	0.930486	0	0
193670	Whim Syndrome	mesothelial cell	-0.534782	1	0.726	0.930486	0	0
193670	Whim Syndrome	myofibroblast cell	-0.496931	1	0.757	0.930486	0	0
193670	Whim Syndrome	neutrophil	1.07926	1	0.092	0.582667	0	0
193670	Whim Syndrome	nk cell	1.83835	1	0.077	0.582667	0	0
193670	Whim Syndrome	non-classical monocyte	0.405631	1	0.169	0.80275	0	0
193670	Whim Syndrome	pericyte cell	-0.385981	1	0.833	0.930486	0	0
193670	Whim Syndrome	plasma cell	-0.201093	1	0.232	0.8816	0	0
193670	Whim Syndrome	plasmacytoid dendritic cell	1.27133	1	0.141	0.765429	0	0
193670	Whim Syndrome	pulmonary ionocyte	-0.342254	1	0.676	0.930486	0	0
193670	Whim Syndrome	respiratory goblet cell	-0.533838	1	0.799	0.930486	0	0
193670	Whim Syndrome	respiratory mucous cell	-0.558699	1	0.589	0.930486	0	0
193670	Whim Syndrome	serous cell of epithelium of bronchus	-0.436183	1	0.53	0.930486	0	0
193670	Whim Syndrome	smooth muscle cell	-0.565923	1	0.751	0.930486	0	0
193670	Whim Syndrome	type i pneumocyte	-0.550632	1	0.893	0.930486	0	0
193670	Whim Syndrome	type ii pneumocyte	-0.538631	1	0.823	0.930486	0	0
193670	Whim Syndrome	vascular associated smooth muscle cell	-0.514604	1	0.801	0.930486	0	0
193670	Whim Syndrome	vein endothelial cell	-0.48941	1	0.892	0.930486	0	0
PS203300	Hermansky-Pudlak syndrome	cd8-positive, alpha-beta t cell	0.14227	5	0.183	0.496714	0	0
PS203300	Hermansky-Pudlak syndrome	cd4-positive, alpha-beta t cell	0.198279	5	0.069	0.32775	0	0
PS203300	Hermansky-Pudlak syndrome	adventitial cell	-0.789055	5	0.994	0.999	0	0
PS203300	Hermansky-Pudlak syndrome	alveolar fibroblast	-0.484133	5	0.979	0.999	0	0
PS203300	Hermansky-Pudlak syndrome	b cell	0.00761664	5	0.081	0.342	0	0
PS203300	Hermansky-Pudlak syndrome	basal cell	-0.0374641	5	0.543	0.982571	0	0
PS203300	Hermansky-Pudlak syndrome	basophil	-0.12893	5	0.322	0.652	0	0
PS203300	Hermansky-Pudlak syndrome	bronchial smooth muscle cell	-0.952378	5	0.999	0.999	0	0
PS203300	Hermansky-Pudlak syndrome	bronchial vessel endothelial cell	-0.553644	5	0.954	0.999	0	0
PS203300	Hermansky-Pudlak syndrome	capillary aerocyte	-0.381936	5	0.931	0.999	0	0
PS203300	Hermansky-Pudlak syndrome	capillary endothelial cell	-0.141117	5	0.673	0.999	0	0
PS203300	Hermansky-Pudlak syndrome	classical monocyte	0.363719	5	0.025	0.228	0	0
PS203300	Hermansky-Pudlak syndrome	club cell	0.0671211	5	0.133	0.4275	0	0
PS203300	Hermansky-Pudlak syndrome	dendritic cell	0.2065	5	0.019	0.228	0	0
PS203300	Hermansky-Pudlak syndrome	endothelial cell of artery	0.0308002	5	0.246	0.549882	0	0
PS203300	Hermansky-Pudlak syndrome	endothelial cell of lymphatic vessel	-0.507097	5	0.941	0.999	0	0
PS203300	Hermansky-Pudlak syndrome	fibroblast	-1.24965	5	0.998	0.999	0	0
PS203300	Hermansky-Pudlak syndrome	intermediate monocyte	-0.041847	5	0.326	0.652	0	0
PS203300	Hermansky-Pudlak syndrome	lung ciliated cell	0.0958962	5	0.207	0.5244	0	0
PS203300	Hermansky-Pudlak syndrome	lung microvascular endothelial cell	-0.440862	5	0.97	0.999	0	0
PS203300	Hermansky-Pudlak syndrome	macrophage	0.207316	5	0.011	0.209	0	0
PS203300	Hermansky-Pudlak syndrome	mesothelial cell	0.146927	5	0.058	0.314857	0	0
PS203300	Hermansky-Pudlak syndrome	myofibroblast cell	0.118342	5	0.172	0.496714	0	0
PS203300	Hermansky-Pudlak syndrome	neutrophil	-0.557952	5	0.671	0.999	0	0
PS203300	Hermansky-Pudlak syndrome	nk cell	0.982801	5	0.041	0.259667	0	0
PS203300	Hermansky-Pudlak syndrome	non-classical monocyte	0.852528	5	0.008	0.209	0	0
PS203300	Hermansky-Pudlak syndrome	pericyte cell	-0.302642	5	0.905	0.999	0	0
PS203300	Hermansky-Pudlak syndrome	plasma cell	-1.1042	5	0.935	0.999	0	0
PS203300	Hermansky-Pudlak syndrome	plasmacytoid dendritic cell	1.26324	5	0.03	0.228	0	0
PS203300	Hermansky-Pudlak syndrome	pulmonary ionocyte	0.188844	5	0.223	0.529625	0	0
PS203300	Hermansky-Pudlak syndrome	respiratory goblet cell	-0.258636	5	0.533	0.982571	0	0
PS203300	Hermansky-Pudlak syndrome	respiratory mucous cell	-1.08995	5	0.964	0.999	0	0
PS203300	Hermansky-Pudlak syndrome	serous cell of epithelium of bronchus	-0.101601	5	0.135	0.4275	0	0
PS203300	Hermansky-Pudlak syndrome	smooth muscle cell	-0.77492	5	0.96	0.999	0	0
PS203300	Hermansky-Pudlak syndrome	type i pneumocyte	0.428821	5	0.092	0.3496	0	0
PS203300	Hermansky-Pudlak syndrome	type ii pneumocyte	-0.559335	5	0.977	0.999	0	0
PS203300	Hermansky-Pudlak syndrome	vascular associated smooth muscle cell	-0.278269	5	0.734	0.999	0	0
PS203300	Hermansky-Pudlak syndrome	vein endothelial cell	-0.510039	5	0.996	0.999	0	0
PS208150	Fetal akinesia deformation sequence	cd8-positive, alpha-beta t cell	-0.195838	1	0.594	0.67373	0	0
PS208150	Fetal akinesia deformation sequence	cd4-positive, alpha-beta t cell	-0.195838	1	0.529	0.67373	0	0
PS208150	Fetal akinesia deformation sequence	adventitial cell	-0.195838	1	0.541	0.67373	0	0
PS208150	Fetal akinesia deformation sequence	alveolar fibroblast	0.676373	1	0.142	0.67373	0	0
PS208150	Fetal akinesia deformation sequence	b cell	-0.195838	1	0.412	0.67373	0	0
PS208150	Fetal akinesia deformation sequence	basal cell	-0.177691	1	0.679	0.679	0	0
PS208150	Fetal akinesia deformation sequence	basophil	-0.195838	1	0.467	0.67373	0	0
PS208150	Fetal akinesia deformation sequence	bronchial smooth muscle cell	-0.195838	1	0.531	0.67373	0	0
PS208150	Fetal akinesia deformation sequence	bronchial vessel endothelial cell	-0.195838	1	0.534	0.67373	0	0
PS208150	Fetal akinesia deformation sequence	capillary aerocyte	-0.195838	1	0.605	0.67373	0	0
PS208150	Fetal akinesia deformation sequence	capillary endothelial cell	-0.195838	1	0.656	0.67373	0	0
PS208150	Fetal akinesia deformation sequence	classical monocyte	-0.195838	1	0.466	0.67373	0	0
PS208150	Fetal akinesia deformation sequence	club cell	-0.195838	1	0.616	0.67373	0	0
PS208150	Fetal akinesia deformation sequence	dendritic cell	-0.195838	1	0.428	0.67373	0	0
PS208150	Fetal akinesia deformation sequence	endothelial cell of artery	-0.195838	1	0.611	0.67373	0	0
PS208150	Fetal akinesia deformation sequence	endothelial cell of lymphatic vessel	-0.195838	1	0.547	0.67373	0	0
PS208150	Fetal akinesia deformation sequence	fibroblast	5.92908	1	0.005	0.19	0	0
PS208150	Fetal akinesia deformation sequence	intermediate monocyte	-0.195838	1	0.509	0.67373	0	0
PS208150	Fetal akinesia deformation sequence	lung ciliated cell	-0.195838	1	0.598	0.67373	0	0
PS208150	Fetal akinesia deformation sequence	lung microvascular endothelial cell	-0.195838	1	0.568	0.67373	0	0
PS208150	Fetal akinesia deformation sequence	macrophage	-0.195523	1	0.418	0.67373	0	0
PS208150	Fetal akinesia deformation sequence	mesothelial cell	-0.195838	1	0.484	0.67373	0	0
PS208150	Fetal akinesia deformation sequence	myofibroblast cell	-0.195838	1	0.575	0.67373	0	0
PS208150	Fetal akinesia deformation sequence	neutrophil	-0.195838	1	0.351	0.67373	0	0
PS208150	Fetal akinesia deformation sequence	nk cell	-0.195838	1	0.616	0.67373	0	0
PS208150	Fetal akinesia deformation sequence	non-classical monocyte	-0.195838	1	0.537	0.67373	0	0
PS208150	Fetal akinesia deformation sequence	pericyte cell	-0.195838	1	0.649	0.67373	0	0
PS208150	Fetal akinesia deformation sequence	plasma cell	-0.195838	1	0.206	0.67373	0	0
PS208150	Fetal akinesia deformation sequence	plasmacytoid dendritic cell	-0.195838	1	0.431	0.67373	0	0
PS208150	Fetal akinesia deformation sequence	pulmonary ionocyte	0.230409	1	0.351	0.67373	0	0
PS208150	Fetal akinesia deformation sequence	respiratory goblet cell	-0.195838	1	0.446	0.67373	0	0
PS208150	Fetal akinesia deformation sequence	respiratory mucous cell	-0.195838	1	0.349	0.67373	0	0
PS208150	Fetal akinesia deformation sequence	serous cell of epithelium of bronchus	-0.195838	1	0.328	0.67373	0	0
PS208150	Fetal akinesia deformation sequence	smooth muscle cell	-0.195838	1	0.453	0.67373	0	0
PS208150	Fetal akinesia deformation sequence	type i pneumocyte	-0.195838	1	0.646	0.67373	0	0
PS208150	Fetal akinesia deformation sequence	type ii pneumocyte	-0.195838	1	0.508	0.67373	0	0
PS208150	Fetal akinesia deformation sequence	vascular associated smooth muscle cell	-0.195838	1	0.603	0.67373	0	0
PS208150	Fetal akinesia deformation sequence	vein endothelial cell	-0.195838	1	0.613	0.67373	0	0
PS208540	Renal-hepatic-pancreatic dysplasia	cd8-positive, alpha-beta t cell	0.0265748	1	0.327	0.755529	0	0
PS208540	Renal-hepatic-pancreatic dysplasia	cd4-positive, alpha-beta t cell	-0.120125	1	0.454	0.958444	0	0
PS208540	Renal-hepatic-pancreatic dysplasia	adventitial cell	0.402345	1	0.185	0.618857	0	0
PS208540	Renal-hepatic-pancreatic dysplasia	alveolar fibroblast	1.44265	1	0.049	0.537429	0	0
PS208540	Renal-hepatic-pancreatic dysplasia	b cell	-0.456267	1	0.646	0.981	0	0
PS208540	Renal-hepatic-pancreatic dysplasia	basal cell	0.0780969	1	0.338	0.755529	0	0
PS208540	Renal-hepatic-pancreatic dysplasia	basophil	-0.575223	1	0.833	0.981	0	0
PS208540	Renal-hepatic-pancreatic dysplasia	bronchial smooth muscle cell	0.915604	1	0.085	0.537429	0	0
PS208540	Renal-hepatic-pancreatic dysplasia	bronchial vessel endothelial cell	-0.850712	1	0.938	0.981	0	0
PS208540	Renal-hepatic-pancreatic dysplasia	capillary aerocyte	1.0142	1	0.132	0.557333	0	0
PS208540	Renal-hepatic-pancreatic dysplasia	capillary endothelial cell	1.56465	1	0.049	0.537429	0	0
PS208540	Renal-hepatic-pancreatic dysplasia	classical monocyte	-0.787896	1	0.937	0.981	0	0
PS208540	Renal-hepatic-pancreatic dysplasia	club cell	-0.258292	1	0.682	0.981	0	0
PS208540	Renal-hepatic-pancreatic dysplasia	dendritic cell	-0.884113	1	0.916	0.981	0	0
PS208540	Renal-hepatic-pancreatic dysplasia	endothelial cell of artery	0.531433	1	0.181	0.618857	0	0
PS208540	Renal-hepatic-pancreatic dysplasia	endothelial cell of lymphatic vessel	1.44548	1	0.115	0.54625	0	0
PS208540	Renal-hepatic-pancreatic dysplasia	fibroblast	2.50673	1	0.084	0.537429	0	0
PS208540	Renal-hepatic-pancreatic dysplasia	intermediate monocyte	-0.873647	1	0.963	0.981	0	0
PS208540	Renal-hepatic-pancreatic dysplasia	lung ciliated cell	0.567961	1	0.217	0.618857	0	0
PS208540	Renal-hepatic-pancreatic dysplasia	lung microvascular endothelial cell	0.546166	1	0.099	0.537429	0	0
PS208540	Renal-hepatic-pancreatic dysplasia	macrophage	-0.970913	1	0.972	0.981	0	0
PS208540	Renal-hepatic-pancreatic dysplasia	mesothelial cell	-0.997757	1	0.921	0.981	0	0
PS208540	Renal-hepatic-pancreatic dysplasia	myofibroblast cell	-0.355742	1	0.69	0.981	0	0
PS208540	Renal-hepatic-pancreatic dysplasia	neutrophil	-1.57052	1	0.921	0.981	0	0
PS208540	Renal-hepatic-pancreatic dysplasia	nk cell	-0.387726	1	0.741	0.981	0	0
PS208540	Renal-hepatic-pancreatic dysplasia	non-classical monocyte	-0.420173	1	0.758	0.981	0	0
PS208540	Renal-hepatic-pancreatic dysplasia	pericyte cell	0.73996	1	0.204	0.618857	0	0
PS208540	Renal-hepatic-pancreatic dysplasia	plasma cell	-1.13488	1	0.807	0.981	0	0
PS208540	Renal-hepatic-pancreatic dysplasia	plasmacytoid dendritic cell	-0.353381	1	0.529	0.981	0	0
PS208540	Renal-hepatic-pancreatic dysplasia	pulmonary ionocyte	0.636333	1	0.254	0.643467	0	0
PS208540	Renal-hepatic-pancreatic dysplasia	respiratory goblet cell	-0.851439	1	0.962	0.981	0	0
PS208540	Renal-hepatic-pancreatic dysplasia	respiratory mucous cell	-0.660828	1	0.672	0.981	0	0
PS208540	Renal-hepatic-pancreatic dysplasia	serous cell of epithelium of bronchus	-0.898641	1	0.765	0.981	0	0
PS208540	Renal-hepatic-pancreatic dysplasia	smooth muscle cell	-1.59486	1	0.981	0.981	0	0
PS208540	Renal-hepatic-pancreatic dysplasia	type i pneumocyte	0.474559	1	0.228	0.618857	0	0
PS208540	Renal-hepatic-pancreatic dysplasia	type ii pneumocyte	-0.901934	1	0.98	0.981	0	0
PS208540	Renal-hepatic-pancreatic dysplasia	vascular associated smooth muscle cell	1.91668	1	0.047	0.537429	0	0
PS208540	Renal-hepatic-pancreatic dysplasia	vein endothelial cell	1.09564	1	0.06	0.537429	0	0
208900	Ataxia-telangiectasia	cd8-positive, alpha-beta t cell	1.56236	1	0.052	0.734667	0	0
208900	Ataxia-telangiectasia	cd4-positive, alpha-beta t cell	1.13695	1	0.058	0.734667	0	0
208900	Ataxia-telangiectasia	adventitial cell	-0.347659	1	0.643	0.874	0	0
208900	Ataxia-telangiectasia	alveolar fibroblast	-0.178753	1	0.611	0.874	0	0
208900	Ataxia-telangiectasia	b cell	0.439401	1	0.133	0.874	0	0
208900	Ataxia-telangiectasia	basal cell	-0.227372	1	0.712	0.874	0	0
208900	Ataxia-telangiectasia	basophil	-0.281121	1	0.584	0.874	0	0
208900	Ataxia-telangiectasia	bronchial smooth muscle cell	-0.0649633	1	0.467	0.874	0	0
208900	Ataxia-telangiectasia	bronchial vessel endothelial cell	-0.598516	1	0.857	0.880162	0	0
208900	Ataxia-telangiectasia	capillary aerocyte	-0.197983	1	0.621	0.874	0	0
208900	Ataxia-telangiectasia	capillary endothelial cell	-0.168175	1	0.604	0.874	0	0
208900	Ataxia-telangiectasia	classical monocyte	0.116196	1	0.203	0.874	0	0
208900	Ataxia-telangiectasia	club cell	-0.329489	1	0.732	0.874	0	0
208900	Ataxia-telangiectasia	dendritic cell	-0.152683	1	0.388	0.874	0	0
208900	Ataxia-telangiectasia	endothelial cell of artery	-0.353085	1	0.767	0.874	0	0
208900	Ataxia-telangiectasia	endothelial cell of lymphatic vessel	-0.492864	1	0.761	0.874	0	0
208900	Ataxia-telangiectasia	fibroblast	-0.154282	1	0.516	0.874	0	1
208900	Ataxia-telangiectasia	intermediate monocyte	0.337047	1	0.181	0.874	0	0
208900	Ataxia-telangiectasia	lung ciliated cell	-0.466154	1	0.828	0.874	0	0
208900	Ataxia-telangiectasia	lung microvascular endothelial cell	-0.346083	1	0.712	0.874	0	0
208900	Ataxia-telangiectasia	macrophage	-0.260292	1	0.441	0.874	0	0
208900	Ataxia-telangiectasia	mesothelial cell	-0.450263	1	0.694	0.874	0	0
208900	Ataxia-telangiectasia	myofibroblast cell	-0.437077	1	0.733	0.874	0	0
208900	Ataxia-telangiectasia	neutrophil	-0.127774	1	0.304	0.874	0	0
208900	Ataxia-telangiectasia	nk cell	5.29477	1	0.002	0.076	1	0
208900	Ataxia-telangiectasia	non-classical monocyte	0.710227	1	0.099	0.874	0	0
208900	Ataxia-telangiectasia	pericyte cell	0.0277217	1	0.402	0.874	0	0
208900	Ataxia-telangiectasia	plasma cell	-0.445422	1	0.403	0.874	0	0
208900	Ataxia-telangiectasia	plasmacytoid dendritic cell	0.218913	1	0.246	0.874	0	0
208900	Ataxia-telangiectasia	pulmonary ionocyte	0.00951273	1	0.387	0.874	0	0
208900	Ataxia-telangiectasia	respiratory goblet cell	-0.477818	1	0.757	0.874	0	0
208900	Ataxia-telangiectasia	respiratory mucous cell	-0.54958	1	0.607	0.874	0	0
208900	Ataxia-telangiectasia	serous cell of epithelium of bronchus	-0.639062	1	0.665	0.874	0	0
208900	Ataxia-telangiectasia	smooth muscle cell	-0.736666	1	0.799	0.874	0	0
208900	Ataxia-telangiectasia	type i pneumocyte	-0.514005	1	0.895	0.895	0	0
208900	Ataxia-telangiectasia	type ii pneumocyte	-0.52031	1	0.821	0.874	0	0
208900	Ataxia-telangiectasia	vascular associated smooth muscle cell	-0.0341742	1	0.484	0.874	0	0
208900	Ataxia-telangiectasia	vein endothelial cell	-0.30147	1	0.74	0.874	0	0
PS300755	Immunodeficiency (Select Examples)	cd8-positive, alpha-beta t cell	1.34692	41	0	0	1	0
PS300755	Immunodeficiency (Select Examples)	cd4-positive, alpha-beta t cell	0.845394	41	0	0	0	0
PS300755	Immunodeficiency (Select Examples)	adventitial cell	-0.305747	41	0.941	1	0	0
PS300755	Immunodeficiency (Select Examples)	alveolar fibroblast	-0.298064	41	0.998	1	0	0
PS300755	Immunodeficiency (Select Examples)	b cell	-0.231159	41	0.276	0.972167	0	0
PS300755	Immunodeficiency (Select Examples)	basal cell	-0.274021	41	1	1	0	0
PS300755	Immunodeficiency (Select Examples)	basophil	-0.276561	41	0.711	1	0	0
PS300755	Immunodeficiency (Select Examples)	bronchial smooth muscle cell	-0.327626	41	0.973	1	0	0
PS300755	Immunodeficiency (Select Examples)	bronchial vessel endothelial cell	-0.328962	41	0.975	1	0	0
PS300755	Immunodeficiency (Select Examples)	capillary aerocyte	-0.251436	41	0.978	1	0	0
PS300755	Immunodeficiency (Select Examples)	capillary endothelial cell	-0.241943	41	0.996	1	0	0
PS300755	Immunodeficiency (Select Examples)	classical monocyte	-0.145772	41	0.172	0.726222	0	0
PS300755	Immunodeficiency (Select Examples)	club cell	-0.383041	41	1	1	0	0
PS300755	Immunodeficiency (Select Examples)	dendritic cell	0.0213755	41	0	0	0	0
PS300755	Immunodeficiency (Select Examples)	endothelial cell of artery	-0.265945	41	0.997	1	0	0
PS300755	Immunodeficiency (Select Examples)	endothelial cell of lymphatic vessel	-0.367891	41	0.998	1	0	0
PS300755	Immunodeficiency (Select Examples)	fibroblast	-0.305747	41	0.965	1	0	0
PS300755	Immunodeficiency (Select Examples)	intermediate monocyte	-0.0865865	41	0.152	0.722	0	0
PS300755	Immunodeficiency (Select Examples)	lung ciliated cell	-0.337984	41	0.999	1	0	0
PS300755	Immunodeficiency (Select Examples)	lung microvascular endothelial cell	-0.313733	41	0.992	1	0	0
PS300755	Immunodeficiency (Select Examples)	macrophage	-0.259488	41	0.307	0.972167	0	0
PS300755	Immunodeficiency (Select Examples)	mesothelial cell	-0.325187	41	0.847	1	0	0
PS300755	Immunodeficiency (Select Examples)	myofibroblast cell	-0.253302	41	0.886	1	0	0
PS300755	Immunodeficiency (Select Examples)	neutrophil	-0.0715258	41	0.005	0.038	0	0
PS300755	Immunodeficiency (Select Examples)	nk cell	1.58462	41	0	0	1	0
PS300755	Immunodeficiency (Select Examples)	non-classical monocyte	-0.000138722	41	0.106	0.575429	0	0
PS300755	Immunodeficiency (Select Examples)	pericyte cell	-0.234134	41	0.997	1	0	0
PS300755	Immunodeficiency (Select Examples)	plasma cell	-0.368121	41	0.02	0.126667	0	0
PS300755	Immunodeficiency (Select Examples)	plasmacytoid dendritic cell	-0.216114	41	0.29	0.972167	0	0
PS300755	Immunodeficiency (Select Examples)	pulmonary ionocyte	-0.270261	41	0.967	1	0	0
PS300755	Immunodeficiency (Select Examples)	respiratory goblet cell	-0.425988	41	0.998	1	0	0
PS300755	Immunodeficiency (Select Examples)	respiratory mucous cell	-0.394538	41	0.488	1	0	0
PS300755	Immunodeficiency (Select Examples)	serous cell of epithelium of bronchus	-0.449794	41	0.763	1	0	0
PS300755	Immunodeficiency (Select Examples)	smooth muscle cell	-0.325187	41	0.823	1	0	0
PS300755	Immunodeficiency (Select Examples)	type i pneumocyte	-0.312922	41	0.999	1	0	0
PS300755	Immunodeficiency (Select Examples)	type ii pneumocyte	-0.304842	41	0.953	1	0	0
PS300755	Immunodeficiency (Select Examples)	vascular associated smooth muscle cell	-0.305747	41	0.99	1	0	0
PS300755	Immunodeficiency (Select Examples)	vein endothelial cell	-0.245321	41	0.995	1	0	0
PS210900	Microcephaly, growth restriction and increased sister chromatid exchange	cd8-positive, alpha-beta t cell	1.43283	1	0.055	0.348333	0	0
PS210900	Microcephaly, growth restriction and increased sister chromatid exchange	cd4-positive, alpha-beta t cell	0.539292	1	0.13	0.548889	0	0
PS210900	Microcephaly, growth restriction and increased sister chromatid exchange	adventitial cell	-0.729554	1	0.893	0.945	0	0
PS210900	Microcephaly, growth restriction and increased sister chromatid exchange	alveolar fibroblast	-0.650063	1	0.916	0.945	0	0
PS210900	Microcephaly, growth restriction and increased sister chromatid exchange	b cell	0.708224	1	0.087	0.472286	0	0
PS210900	Microcephaly, growth restriction and increased sister chromatid exchange	basal cell	-0.504616	1	0.929	0.945	0	0
PS210900	Microcephaly, growth restriction and increased sister chromatid exchange	basophil	0.278109	1	0.148	0.5624	0	0
PS210900	Microcephaly, growth restriction and increased sister chromatid exchange	bronchial smooth muscle cell	-0.729554	1	0.888	0.945	0	0
PS210900	Microcephaly, growth restriction and increased sister chromatid exchange	bronchial vessel endothelial cell	-0.306665	1	0.622	0.945	0	0
PS210900	Microcephaly, growth restriction and increased sister chromatid exchange	capillary aerocyte	-0.301489	1	0.719	0.945	0	0
PS210900	Microcephaly, growth restriction and increased sister chromatid exchange	capillary endothelial cell	-0.446306	1	0.886	0.945	0	0
PS210900	Microcephaly, growth restriction and increased sister chromatid exchange	classical monocyte	1.29788	1	0.049	0.348333	0	0
PS210900	Microcephaly, growth restriction and increased sister chromatid exchange	club cell	-0.524912	1	0.892	0.945	0	0
PS210900	Microcephaly, growth restriction and increased sister chromatid exchange	dendritic cell	-0.0890761	1	0.344	0.945	0	0
PS210900	Microcephaly, growth restriction and increased sister chromatid exchange	endothelial cell of artery	-0.38445	1	0.792	0.945	0	0
PS210900	Microcephaly, growth restriction and increased sister chromatid exchange	endothelial cell of lymphatic vessel	-0.729554	1	0.886	0.945	0	0
PS210900	Microcephaly, growth restriction and increased sister chromatid exchange	fibroblast	-0.729554	1	0.82	0.945	0	0
PS210900	Microcephaly, growth restriction and increased sister chromatid exchange	intermediate monocyte	2.76474	1	0.014	0.348333	0	0
PS210900	Microcephaly, growth restriction and increased sister chromatid exchange	lung ciliated cell	-0.382066	1	0.773	0.945	0	0
PS210900	Microcephaly, growth restriction and increased sister chromatid exchange	lung microvascular endothelial cell	-0.529088	1	0.897	0.945	0	0
PS210900	Microcephaly, growth restriction and increased sister chromatid exchange	macrophage	0.151468	1	0.173	0.597636	0	0
PS210900	Microcephaly, growth restriction and increased sister chromatid exchange	mesothelial cell	-0.729554	1	0.845	0.945	0	0
PS210900	Microcephaly, growth restriction and increased sister chromatid exchange	myofibroblast cell	1.58876	1	0.121	0.548889	0	0
PS210900	Microcephaly, growth restriction and increased sister chromatid exchange	neutrophil	-0.729554	1	0.645	0.945	0	0
PS210900	Microcephaly, growth restriction and increased sister chromatid exchange	nk cell	3.24388	1	0.029	0.348333	0	0
PS210900	Microcephaly, growth restriction and increased sister chromatid exchange	non-classical monocyte	1.55772	1	0.042	0.348333	0	0
PS210900	Microcephaly, growth restriction and increased sister chromatid exchange	pericyte cell	-0.462047	1	0.88	0.945	0	0
PS210900	Microcephaly, growth restriction and increased sister chromatid exchange	plasma cell	-0.282363	1	0.251	0.794833	0	0
PS210900	Microcephaly, growth restriction and increased sister chromatid exchange	plasmacytoid dendritic cell	-0.729554	1	0.766	0.945	0	0
PS210900	Microcephaly, growth restriction and increased sister chromatid exchange	pulmonary ionocyte	-0.729554	1	0.887	0.945	0	0
PS210900	Microcephaly, growth restriction and increased sister chromatid exchange	respiratory goblet cell	-0.345334	1	0.585	0.945	0	0
PS210900	Microcephaly, growth restriction and increased sister chromatid exchange	respiratory mucous cell	-0.729554	1	0.712	0.945	0	0
PS210900	Microcephaly, growth restriction and increased sister chromatid exchange	serous cell of epithelium of bronchus	0.80639	1	0.05	0.348333	0	0
PS210900	Microcephaly, growth restriction and increased sister chromatid exchange	smooth muscle cell	-0.729554	1	0.804	0.945	0	0
PS210900	Microcephaly, growth restriction and increased sister chromatid exchange	type i pneumocyte	-0.642805	1	0.945	0.945	0	0
PS210900	Microcephaly, growth restriction and increased sister chromatid exchange	type ii pneumocyte	-0.44412	1	0.748	0.945	0	0
PS210900	Microcephaly, growth restriction and increased sister chromatid exchange	vascular associated smooth muscle cell	-0.255923	1	0.627	0.945	0	0
PS210900	Microcephaly, growth restriction and increased sister chromatid exchange	vein endothelial cell	-0.522425	1	0.927	0.945	0	0
PS211400	Bronchiectasis	cd8-positive, alpha-beta t cell	-0.338146	4	0.871	0.919	0	0
PS211400	Bronchiectasis	cd4-positive, alpha-beta t cell	-0.346412	4	0.784	0.919	0	0
PS211400	Bronchiectasis	adventitial cell	-0.362867	4	0.8	0.919	0	0
PS211400	Bronchiectasis	alveolar fibroblast	-0.280034	4	0.814	0.919	0	0
PS211400	Bronchiectasis	b cell	-0.367476	4	0.631	0.919	0	0
PS211400	Bronchiectasis	basal cell	0.453745	4	0.073	0.462333	0	0
PS211400	Bronchiectasis	basophil	-0.365231	4	0.75	0.919	0	0
PS211400	Bronchiectasis	bronchial smooth muscle cell	-0.365939	4	0.8	0.919	0	0
PS211400	Bronchiectasis	bronchial vessel endothelial cell	-0.33143	4	0.747	0.919	0	0
PS211400	Bronchiectasis	capillary aerocyte	-0.276464	4	0.81	0.919	0	0
PS211400	Bronchiectasis	capillary endothelial cell	-0.283195	4	0.855	0.919	0	0
PS211400	Bronchiectasis	classical monocyte	-0.344678	4	0.724	0.919	0	0
PS211400	Bronchiectasis	club cell	1.16623	4	0.001	0.0126667	1	0
PS211400	Bronchiectasis	dendritic cell	-0.365467	4	0.679	0.919	0	0
PS211400	Bronchiectasis	endothelial cell of artery	-0.348278	4	0.919	0.919	0	0
PS211400	Bronchiectasis	endothelial cell of lymphatic vessel	-0.320019	4	0.766	0.919	0	0
PS211400	Bronchiectasis	fibroblast	-0.348278	4	0.769	0.919	0	0
PS211400	Bronchiectasis	intermediate monocyte	-0.367476	4	0.783	0.919	0	0
PS211400	Bronchiectasis	lung ciliated cell	-0.00170752	4	0.453	0.919	0	1
PS211400	Bronchiectasis	lung microvascular endothelial cell	-0.31987	4	0.819	0.919	0	0
PS211400	Bronchiectasis	macrophage	-0.358991	4	0.642	0.919	0	0
PS211400	Bronchiectasis	mesothelial cell	-0.346057	4	0.665	0.919	0	0
PS211400	Bronchiectasis	myofibroblast cell	-0.326937	4	0.768	0.919	0	0
PS211400	Bronchiectasis	neutrophil	-0.367476	4	0.399	0.919	0	1
PS211400	Bronchiectasis	nk cell	-0.330393	4	0.845	0.919	0	0
PS211400	Bronchiectasis	non-classical monocyte	-0.349754	4	0.848	0.919	0	0
PS211400	Bronchiectasis	pericyte cell	-0.316587	4	0.914	0.919	0	0
PS211400	Bronchiectasis	plasma cell	-0.342297	4	0.177	0.84075	0	0
PS211400	Bronchiectasis	plasmacytoid dendritic cell	-0.367476	4	0.62	0.919	0	0
PS211400	Bronchiectasis	pulmonary ionocyte	4.83546	4	0	0	1	0
PS211400	Bronchiectasis	respiratory goblet cell	0.852775	4	0.001	0.0126667	0	0
PS211400	Bronchiectasis	respiratory mucous cell	1.24726	4	0.003	0.0285	1	1
PS211400	Bronchiectasis	serous cell of epithelium of bronchus	-0.241522	4	0.254	0.919	0	0
PS211400	Bronchiectasis	smooth muscle cell	-0.360009	4	0.659	0.919	0	0
PS211400	Bronchiectasis	type i pneumocyte	0.972576	4	0.027	0.2052	0	0
PS211400	Bronchiectasis	type ii pneumocyte	0.0974723	4	0.104	0.564571	0	0
PS211400	Bronchiectasis	vascular associated smooth muscle cell	-0.280813	4	0.773	0.919	0	0
PS211400	Bronchiectasis	vein endothelial cell	-0.319121	4	0.911	0.919	0	0
PS211530	Brown-Vialetto-Van Laere syndrome	cd8-positive, alpha-beta t cell	-0.36642	1	0.752	0.907778	0	0
PS211530	Brown-Vialetto-Van Laere syndrome	cd4-positive, alpha-beta t cell	-0.545776	1	0.839	0.907778	0	0
PS211530	Brown-Vialetto-Van Laere syndrome	adventitial cell	-0.545776	1	0.807	0.907778	0	0
PS211530	Brown-Vialetto-Van Laere syndrome	alveolar fibroblast	-0.545776	1	0.9	0.915	0	0
PS211530	Brown-Vialetto-Van Laere syndrome	b cell	-0.545776	1	0.723	0.907778	0	0
PS211530	Brown-Vialetto-Van Laere syndrome	basal cell	0.23441	1	0.264	0.907778	0	0
PS211530	Brown-Vialetto-Van Laere syndrome	basophil	-0.545776	1	0.792	0.907778	0	0
PS211530	Brown-Vialetto-Van Laere syndrome	bronchial smooth muscle cell	-0.545776	1	0.818	0.907778	0	0
PS211530	Brown-Vialetto-Van Laere syndrome	bronchial vessel endothelial cell	0.548899	1	0.157	0.705111	0	0
PS211530	Brown-Vialetto-Van Laere syndrome	capillary aerocyte	0.275817	1	0.266	0.907778	0	0
PS211530	Brown-Vialetto-Van Laere syndrome	capillary endothelial cell	0.852894	1	0.151	0.705111	0	0
PS211530	Brown-Vialetto-Van Laere syndrome	classical monocyte	-0.447291	1	0.731	0.907778	0	0
PS211530	Brown-Vialetto-Van Laere syndrome	club cell	0.375167	1	0.167	0.705111	0	0
PS211530	Brown-Vialetto-Van Laere syndrome	dendritic cell	-0.545776	1	0.761	0.907778	0	0
PS211530	Brown-Vialetto-Van Laere syndrome	endothelial cell of artery	2.82139	1	0.011	0.177333	0	0
PS211530	Brown-Vialetto-Van Laere syndrome	endothelial cell of lymphatic vessel	-0.545776	1	0.801	0.907778	0	0
PS211530	Brown-Vialetto-Van Laere syndrome	fibroblast	-0.545776	1	0.764	0.907778	0	0
PS211530	Brown-Vialetto-Van Laere syndrome	intermediate monocyte	-0.545776	1	0.808	0.907778	0	0
PS211530	Brown-Vialetto-Van Laere syndrome	lung ciliated cell	-0.320459	1	0.729	0.907778	0	0
PS211530	Brown-Vialetto-Van Laere syndrome	lung microvascular endothelial cell	1.18171	1	0.05	0.475	0	0
PS211530	Brown-Vialetto-Van Laere syndrome	macrophage	-0.522626	1	0.73	0.907778	0	0
PS211530	Brown-Vialetto-Van Laere syndrome	mesothelial cell	-0.545776	1	0.744	0.907778	0	0
PS211530	Brown-Vialetto-Van Laere syndrome	myofibroblast cell	-0.545776	1	0.75	0.907778	0	0
PS211530	Brown-Vialetto-Van Laere syndrome	neutrophil	-0.545776	1	0.587	0.907778	0	0
PS211530	Brown-Vialetto-Van Laere syndrome	nk cell	-0.545776	1	0.86	0.907778	0	0
PS211530	Brown-Vialetto-Van Laere syndrome	non-classical monocyte	-0.545776	1	0.851	0.907778	0	0
PS211530	Brown-Vialetto-Van Laere syndrome	pericyte cell	-0.545776	1	0.915	0.915	0	0
PS211530	Brown-Vialetto-Van Laere syndrome	plasma cell	-0.545776	1	0.496	0.907778	0	0
PS211530	Brown-Vialetto-Van Laere syndrome	plasmacytoid dendritic cell	-0.545776	1	0.703	0.907778	0	0
PS211530	Brown-Vialetto-Van Laere syndrome	pulmonary ionocyte	-0.545776	1	0.831	0.907778	0	0
PS211530	Brown-Vialetto-Van Laere syndrome	respiratory goblet cell	0.303638	1	0.094	0.595333	0	0
PS211530	Brown-Vialetto-Van Laere syndrome	respiratory mucous cell	0.50226	1	0.085	0.595333	0	0
PS211530	Brown-Vialetto-Van Laere syndrome	serous cell of epithelium of bronchus	3.45975	1	0.014	0.177333	0	0
PS211530	Brown-Vialetto-Van Laere syndrome	smooth muscle cell	-0.545776	1	0.739	0.907778	0	0
PS211530	Brown-Vialetto-Van Laere syndrome	type i pneumocyte	0.170618	1	0.32	0.907778	0	0
PS211530	Brown-Vialetto-Van Laere syndrome	type ii pneumocyte	-0.24892	1	0.554	0.907778	0	0
PS211530	Brown-Vialetto-Van Laere syndrome	vascular associated smooth muscle cell	-0.545776	1	0.835	0.907778	0	0
PS211530	Brown-Vialetto-Van Laere syndrome	vein endothelial cell	2.64045	1	0.005	0.177333	0	0
211980	Lung Cancer, Susceptibility To	cd8-positive, alpha-beta t cell	0.55343	3	0.098	0.532	0	0
211980	Lung Cancer, Susceptibility To	cd4-positive, alpha-beta t cell	0.930242	3	0.013	0.247	0	0
211980	Lung Cancer, Susceptibility To	adventitial cell	-0.570758	3	0.917	0.967	0	0
211980	Lung Cancer, Susceptibility To	alveolar fibroblast	0.508881	3	0.09	0.532	0	0
211980	Lung Cancer, Susceptibility To	b cell	-0.557776	3	0.82	0.967	0	0
211980	Lung Cancer, Susceptibility To	basal cell	0.676639	3	0.03	0.3268	0	0
211980	Lung Cancer, Susceptibility To	basophil	-0.259229	3	0.547	0.907043	0	0
211980	Lung Cancer, Susceptibility To	bronchial smooth muscle cell	-0.333104	3	0.73	0.967	0	0
211980	Lung Cancer, Susceptibility To	bronchial vessel endothelial cell	-0.655296	3	0.957	0.967	0	0
211980	Lung Cancer, Susceptibility To	capillary aerocyte	-0.277348	3	0.77	0.967	0	0
211980	Lung Cancer, Susceptibility To	capillary endothelial cell	0.147645	3	0.228	0.587733	0	0
211980	Lung Cancer, Susceptibility To	classical monocyte	0.025747	3	0.152	0.587733	0	0
211980	Lung Cancer, Susceptibility To	club cell	0.591121	3	0.043	0.3268	0	0
211980	Lung Cancer, Susceptibility To	dendritic cell	-0.230629	3	0.433	0.83419	0	0
211980	Lung Cancer, Susceptibility To	endothelial cell of artery	0.234496	3	0.178	0.587733	0	0
211980	Lung Cancer, Susceptibility To	endothelial cell of lymphatic vessel	-0.610051	3	0.923	0.967	0	0
211980	Lung Cancer, Susceptibility To	fibroblast	0.419869	3	0.232	0.587733	0	0
211980	Lung Cancer, Susceptibility To	intermediate monocyte	0.0820125	3	0.141	0.587733	0	0
211980	Lung Cancer, Susceptibility To	lung ciliated cell	-0.22749	3	0.717	0.967	0	0
211980	Lung Cancer, Susceptibility To	lung microvascular endothelial cell	-0.414668	3	0.886	0.967	0	0
211980	Lung Cancer, Susceptibility To	macrophage	-0.755677	3	0.967	0.967	0	0
211980	Lung Cancer, Susceptibility To	mesothelial cell	-0.105661	3	0.364	0.768444	0	1
211980	Lung Cancer, Susceptibility To	myofibroblast cell	0.418996	3	0.168	0.587733	0	0
211980	Lung Cancer, Susceptibility To	neutrophil	-0.74166	3	0.764	0.967	0	0
211980	Lung Cancer, Susceptibility To	nk cell	2.77597	3	0.003	0.114	0	1
211980	Lung Cancer, Susceptibility To	non-classical monocyte	-0.112824	3	0.445	0.83419	0	0
211980	Lung Cancer, Susceptibility To	pericyte cell	0.352198	3	0.209	0.587733	0	0
211980	Lung Cancer, Susceptibility To	plasma cell	-0.72949	3	0.645	0.967	0	0
211980	Lung Cancer, Susceptibility To	plasmacytoid dendritic cell	-0.0963546	3	0.336	0.751059	0	0
211980	Lung Cancer, Susceptibility To	pulmonary ionocyte	0.500675	3	0.205	0.587733	0	0
211980	Lung Cancer, Susceptibility To	respiratory goblet cell	0.126016	3	0.036	0.3268	0	0
211980	Lung Cancer, Susceptibility To	respiratory mucous cell	-0.361391	3	0.461	0.83419	0	0
211980	Lung Cancer, Susceptibility To	serous cell of epithelium of bronchus	-0.688058	3	0.787	0.967	0	0
211980	Lung Cancer, Susceptibility To	smooth muscle cell	-0.688058	3	0.89	0.967	0	0
211980	Lung Cancer, Susceptibility To	type i pneumocyte	0.108328	3	0.288	0.684	0	0
211980	Lung Cancer, Susceptibility To	type ii pneumocyte	-0.230198	3	0.549	0.907043	0	0
211980	Lung Cancer, Susceptibility To	vascular associated smooth muscle cell	-0.335851	3	0.777	0.967	0	0
211980	Lung Cancer, Susceptibility To	vein endothelial cell	-0.381205	3	0.908	0.967	0	0
PS214100	Peroxisome biogenesis disorder	cd8-positive, alpha-beta t cell	0.856641	1	0.145	0.584615	0	0
PS214100	Peroxisome biogenesis disorder	cd4-positive, alpha-beta t cell	0.221727	1	0.2	0.584615	0	0
PS214100	Peroxisome biogenesis disorder	adventitial cell	-0.261258	1	0.584	0.992	0	0
PS214100	Peroxisome biogenesis disorder	alveolar fibroblast	-0.010042	1	0.473	0.992	0	0
PS214100	Peroxisome biogenesis disorder	b cell	-0.471352	1	0.656	0.992	0	0
PS214100	Peroxisome biogenesis disorder	basal cell	0.817219	1	0.104	0.584615	0	0
PS214100	Peroxisome biogenesis disorder	basophil	-0.631992	1	0.878	0.992	0	0
PS214100	Peroxisome biogenesis disorder	bronchial smooth muscle cell	0.0278944	1	0.293	0.724375	0	0
PS214100	Peroxisome biogenesis disorder	bronchial vessel endothelial cell	-0.388692	1	0.713	0.992	0	0
PS214100	Peroxisome biogenesis disorder	capillary aerocyte	-0.192905	1	0.611	0.992	0	0
PS214100	Peroxisome biogenesis disorder	capillary endothelial cell	0.467856	1	0.24	0.651429	0	0
PS214100	Peroxisome biogenesis disorder	classical monocyte	-0.66583	1	0.891	0.992	0	0
PS214100	Peroxisome biogenesis disorder	club cell	0.539366	1	0.121	0.584615	0	0
PS214100	Peroxisome biogenesis disorder	dendritic cell	-1.24676	1	0.992	0.992	0	0
PS214100	Peroxisome biogenesis disorder	endothelial cell of artery	0.534934	1	0.197	0.584615	0	0
PS214100	Peroxisome biogenesis disorder	endothelial cell of lymphatic vessel	0.95562	1	0.164	0.584615	0	0
PS214100	Peroxisome biogenesis disorder	fibroblast	1.44796	1	0.176	0.584615	0	0
PS214100	Peroxisome biogenesis disorder	intermediate monocyte	-0.602477	1	0.837	0.992	0	0
PS214100	Peroxisome biogenesis disorder	lung ciliated cell	1.57667	1	0.125	0.584615	0	0
PS214100	Peroxisome biogenesis disorder	lung microvascular endothelial cell	-0.214541	1	0.561	0.992	0	0
PS214100	Peroxisome biogenesis disorder	macrophage	-0.968442	1	0.964	0.992	0	0
PS214100	Peroxisome biogenesis disorder	mesothelial cell	0.571299	1	0.098	0.584615	0	0
PS214100	Peroxisome biogenesis disorder	myofibroblast cell	-0.962943	1	0.914	0.992	0	0
PS214100	Peroxisome biogenesis disorder	neutrophil	-1.59638	1	0.936	0.992	0	0
PS214100	Peroxisome biogenesis disorder	nk cell	2.2643	1	0.054	0.584615	0	0
PS214100	Peroxisome biogenesis disorder	non-classical monocyte	-0.860289	1	0.982	0.992	0	0
PS214100	Peroxisome biogenesis disorder	pericyte cell	1.42523	1	0.083	0.584615	0	0
PS214100	Peroxisome biogenesis disorder	plasma cell	-1.15702	1	0.791	0.992	0	0
PS214100	Peroxisome biogenesis disorder	plasmacytoid dendritic cell	-1.83738	1	0.985	0.992	0	0
PS214100	Peroxisome biogenesis disorder	pulmonary ionocyte	0.235698	1	0.372	0.831529	0	0
PS214100	Peroxisome biogenesis disorder	respiratory goblet cell	-0.0476897	1	0.305	0.724375	0	0
PS214100	Peroxisome biogenesis disorder	respiratory mucous cell	0.476277	1	0.081	0.584615	0	0
PS214100	Peroxisome biogenesis disorder	serous cell of epithelium of bronchus	2.39722	1	0.017	0.584615	0	0
PS214100	Peroxisome biogenesis disorder	smooth muscle cell	-1.34463	1	0.969	0.992	0	0
PS214100	Peroxisome biogenesis disorder	type i pneumocyte	-0.0547973	1	0.537	0.992	0	0
PS214100	Peroxisome biogenesis disorder	type ii pneumocyte	-0.429369	1	0.754	0.992	0	0
PS214100	Peroxisome biogenesis disorder	vascular associated smooth muscle cell	-0.761542	1	0.927	0.992	0	0
PS214100	Peroxisome biogenesis disorder	vein endothelial cell	-0.109596	1	0.525	0.992	0	0
218040	Costello Syndrome	cd8-positive, alpha-beta t cell	-0.430616	1	0.796	0.967	0	0
218040	Costello Syndrome	cd4-positive, alpha-beta t cell	-0.645748	1	0.891	0.967	0	0
218040	Costello Syndrome	adventitial cell	0.398564	1	0.168	0.591714	0	0
218040	Costello Syndrome	alveolar fibroblast	-0.523151	1	0.867	0.967	0	0
218040	Costello Syndrome	b cell	-1.16528	1	0.95	0.967	0	0
218040	Costello Syndrome	basal cell	2.08249	1	0.019	0.591714	0	0
218040	Costello Syndrome	basophil	-0.884108	1	0.958	0.967	0	0
218040	Costello Syndrome	bronchial smooth muscle cell	1.99307	1	0.034	0.591714	0	0
218040	Costello Syndrome	bronchial vessel endothelial cell	0.148749	1	0.251	0.635867	0	0
218040	Costello Syndrome	capillary aerocyte	0.719054	1	0.148	0.591714	0	0
218040	Costello Syndrome	capillary endothelial cell	0.565304	1	0.193	0.591714	0	0
218040	Costello Syndrome	classical monocyte	-0.886321	1	0.956	0.967	0	0
218040	Costello Syndrome	club cell	-0.761477	1	0.967	0.967	0	0
218040	Costello Syndrome	dendritic cell	-0.889101	1	0.925	0.967	0	0
218040	Costello Syndrome	endothelial cell of artery	0.202877	1	0.318	0.710824	0	0
218040	Costello Syndrome	endothelial cell of lymphatic vessel	1.36122	1	0.122	0.591714	0	0
218040	Costello Syndrome	fibroblast	-0.658207	1	0.786	0.967	0	0
218040	Costello Syndrome	intermediate monocyte	-0.822308	1	0.947	0.967	0	0
218040	Costello Syndrome	lung ciliated cell	1.15088	1	0.184	0.591714	0	0
218040	Costello Syndrome	lung microvascular endothelial cell	0.16606	1	0.218	0.591714	0	0
218040	Costello Syndrome	macrophage	-0.804226	1	0.908	0.967	0	0
218040	Costello Syndrome	mesothelial cell	0.238483	1	0.163	0.591714	0	0
218040	Costello Syndrome	myofibroblast cell	0.212676	1	0.312	0.710824	0	0
218040	Costello Syndrome	neutrophil	-1.02106	1	0.782	0.967	0	0
218040	Costello Syndrome	nk cell	-0.0769748	1	0.534	0.967	0	0
218040	Costello Syndrome	non-classical monocyte	-0.688826	1	0.937	0.967	0	0
218040	Costello Syndrome	pericyte cell	0.634755	1	0.208	0.591714	0	0
218040	Costello Syndrome	plasma cell	-1.13601	1	0.814	0.967	0	0
218040	Costello Syndrome	plasmacytoid dendritic cell	-1.26133	1	0.923	0.967	0	0
218040	Costello Syndrome	pulmonary ionocyte	2.6527	1	0.07	0.591714	0	0
218040	Costello Syndrome	respiratory goblet cell	-0.500382	1	0.772	0.967	0	0
218040	Costello Syndrome	respiratory mucous cell	-0.890679	1	0.773	0.967	0	0
218040	Costello Syndrome	serous cell of epithelium of bronchus	-0.924204	1	0.786	0.967	0	0
218040	Costello Syndrome	smooth muscle cell	1.57059	1	0.059	0.591714	0	0
218040	Costello Syndrome	type i pneumocyte	0.933427	1	0.122	0.591714	0	0
218040	Costello Syndrome	type ii pneumocyte	-0.313713	1	0.617	0.967	0	0
218040	Costello Syndrome	vascular associated smooth muscle cell	0.432084	1	0.187	0.591714	0	0
218040	Costello Syndrome	vein endothelial cell	-0.179251	1	0.619	0.967	0	0
PS219000	Fraser syndrome	cd8-positive, alpha-beta t cell	-0.0583308	2	0.506	0.938	0	0
PS219000	Fraser syndrome	cd4-positive, alpha-beta t cell	0.42714	2	0.141	0.765429	0	0
PS219000	Fraser syndrome	adventitial cell	-0.405694	2	0.777	0.938	0	0
PS219000	Fraser syndrome	alveolar fibroblast	0.238489	2	0.253	0.938	0	0
PS219000	Fraser syndrome	b cell	-0.470865	2	0.7	0.938	0	0
PS219000	Fraser syndrome	basal cell	0.899458	2	0.057	0.5415	0	0
PS219000	Fraser syndrome	basophil	-0.470865	2	0.842	0.938	0	0
PS219000	Fraser syndrome	bronchial smooth muscle cell	-0.0334126	2	0.413	0.938	0	0
PS219000	Fraser syndrome	bronchial vessel endothelial cell	-0.470865	2	0.849	0.938	0	0
PS219000	Fraser syndrome	capillary aerocyte	-0.136498	2	0.594	0.938	0	0
PS219000	Fraser syndrome	capillary endothelial cell	-0.296549	2	0.837	0.938	0	0
PS219000	Fraser syndrome	classical monocyte	-0.212034	2	0.515	0.938	0	0
PS219000	Fraser syndrome	club cell	0.723462	2	0.055	0.5415	0	0
PS219000	Fraser syndrome	dendritic cell	-0.185592	2	0.426	0.938	0	0
PS219000	Fraser syndrome	endothelial cell of artery	-0.440784	2	0.913	0.938	0	0
PS219000	Fraser syndrome	endothelial cell of lymphatic vessel	-0.28524	2	0.688	0.938	0	0
PS219000	Fraser syndrome	fibroblast	-0.470865	2	0.795	0.938	0	0
PS219000	Fraser syndrome	intermediate monocyte	-0.323606	2	0.695	0.938	0	0
PS219000	Fraser syndrome	lung ciliated cell	-0.165133	2	0.671	0.938	0	0
PS219000	Fraser syndrome	lung microvascular endothelial cell	-0.470865	2	0.918	0.938	0	0
PS219000	Fraser syndrome	macrophage	-0.441573	2	0.715	0.938	0	0
PS219000	Fraser syndrome	mesothelial cell	4.56892	2	0	0	1	0
PS219000	Fraser syndrome	myofibroblast cell	1.89767	2	0.081	0.6156	0	0
PS219000	Fraser syndrome	neutrophil	-0.470865	2	0.534	0.938	0	0
PS219000	Fraser syndrome	nk cell	-0.470865	2	0.88	0.938	0	0
PS219000	Fraser syndrome	non-classical monocyte	-0.404481	2	0.858	0.938	0	0
PS219000	Fraser syndrome	pericyte cell	-0.427225	2	0.916	0.938	0	0
PS219000	Fraser syndrome	plasma cell	-0.470865	2	0.33	0.938	0	0
PS219000	Fraser syndrome	plasmacytoid dendritic cell	-0.470865	2	0.696	0.938	0	0
PS219000	Fraser syndrome	pulmonary ionocyte	-0.470865	2	0.853	0.938	0	0
PS219000	Fraser syndrome	respiratory goblet cell	0.233084	2	0.109	0.690333	0	0
PS219000	Fraser syndrome	respiratory mucous cell	0.948515	2	0.043	0.5415	0	0
PS219000	Fraser syndrome	serous cell of epithelium of bronchus	-0.470865	2	0.544	0.938	0	0
PS219000	Fraser syndrome	smooth muscle cell	-0.470865	2	0.713	0.938	0	0
PS219000	Fraser syndrome	type i pneumocyte	0.667148	2	0.168	0.798	0	0
PS219000	Fraser syndrome	type ii pneumocyte	-0.216106	2	0.545	0.938	0	0
PS219000	Fraser syndrome	vascular associated smooth muscle cell	-0.470865	2	0.874	0.938	0	0
PS219000	Fraser syndrome	vein endothelial cell	-0.450386	2	0.938	0.938	0	0
219700	Cystic Fibrosis	cd8-positive, alpha-beta t cell	-0.285289	2	0.738	0.844	0	0
219700	Cystic Fibrosis	cd4-positive, alpha-beta t cell	-0.269955	2	0.634	0.844	0	0
219700	Cystic Fibrosis	adventitial cell	-0.308495	2	0.678	0.844	0	0
219700	Cystic Fibrosis	alveolar fibroblast	-0.274128	2	0.762	0.844	0	0
219700	Cystic Fibrosis	b cell	-0.303663	2	0.524	0.844	0	0
219700	Cystic Fibrosis	basal cell	-0.206997	2	0.769	0.844	0	0
219700	Cystic Fibrosis	basophil	-0.231651	2	0.531	0.844	0	0
219700	Cystic Fibrosis	bronchial smooth muscle cell	-0.27383	2	0.674	0.844	0	0
219700	Cystic Fibrosis	bronchial vessel endothelial cell	-0.282481	2	0.681	0.844	0	0
219700	Cystic Fibrosis	capillary aerocyte	-0.274918	2	0.75	0.844	0	0
219700	Cystic Fibrosis	capillary endothelial cell	-0.277246	2	0.82	0.844	0	0
219700	Cystic Fibrosis	classical monocyte	0.207274	2	0.192	0.844	0	0
219700	Cystic Fibrosis	club cell	-0.177625	2	0.6	0.844	0	0
219700	Cystic Fibrosis	dendritic cell	0.655818	2	0.063	0.7885	0	0
219700	Cystic Fibrosis	endothelial cell of artery	-0.293159	2	0.792	0.844	0	0
219700	Cystic Fibrosis	endothelial cell of lymphatic vessel	-0.277676	2	0.696	0.844	0	0
219700	Cystic Fibrosis	fibroblast	-0.245182	2	0.64	0.844	0	0
219700	Cystic Fibrosis	intermediate monocyte	0.250385	2	0.217	0.844	0	0
219700	Cystic Fibrosis	lung ciliated cell	-0.277186	2	0.788	0.844	0	0
219700	Cystic Fibrosis	lung microvascular endothelial cell	-0.296483	2	0.717	0.844	0	0
219700	Cystic Fibrosis	macrophage	0.458414	2	0.083	0.7885	0	0
219700	Cystic Fibrosis	mesothelial cell	-0.11038	2	0.39	0.844	0	0
219700	Cystic Fibrosis	myofibroblast cell	-0.215872	2	0.624	0.844	0	0
219700	Cystic Fibrosis	neutrophil	2.46755	2	0.024	0.456	0	0
219700	Cystic Fibrosis	nk cell	-0.259116	2	0.733	0.844	0	0
219700	Cystic Fibrosis	non-classical monocyte	0.600707	2	0.115	0.844	0	0
219700	Cystic Fibrosis	pericyte cell	-0.285375	2	0.828	0.844	0	0
219700	Cystic Fibrosis	plasma cell	-0.268857	2	0.164	0.844	0	0
219700	Cystic Fibrosis	plasmacytoid dendritic cell	-0.322598	2	0.606	0.844	0	0
219700	Cystic Fibrosis	pulmonary ionocyte	2.76847	2	0.02	0.456	0	0
219700	Cystic Fibrosis	respiratory goblet cell	-0.127175	2	0.327	0.844	0	0
219700	Cystic Fibrosis	respiratory mucous cell	0.149198	2	0.153	0.844	0	1
219700	Cystic Fibrosis	serous cell of epithelium of bronchus	-0.264291	2	0.336	0.844	0	0
219700	Cystic Fibrosis	smooth muscle cell	-0.322598	2	0.592	0.844	0	0
219700	Cystic Fibrosis	type i pneumocyte	-0.249538	2	0.751	0.844	0	0
219700	Cystic Fibrosis	type ii pneumocyte	-0.0837091	2	0.374	0.844	0	0
219700	Cystic Fibrosis	vascular associated smooth muscle cell	-0.196244	2	0.625	0.844	0	0
219700	Cystic Fibrosis	vein endothelial cell	-0.296096	2	0.844	0.844	0	0
222700	Lysinuric Protein Intolerance	cd8-positive, alpha-beta t cell	-0.503294	1	0.865	0.898649	0	0
222700	Lysinuric Protein Intolerance	cd4-positive, alpha-beta t cell	-0.502128	1	0.774	0.898649	0	0
222700	Lysinuric Protein Intolerance	adventitial cell	-0.278788	1	0.6	0.898649	0	0
222700	Lysinuric Protein Intolerance	alveolar fibroblast	-0.0975549	1	0.512	0.898649	0	0
222700	Lysinuric Protein Intolerance	b cell	-0.299376	1	0.529	0.898649	0	0
222700	Lysinuric Protein Intolerance	basal cell	-0.471407	1	0.904	0.904	0	0
222700	Lysinuric Protein Intolerance	basophil	-0.138487	1	0.397	0.898649	0	0
222700	Lysinuric Protein Intolerance	bronchial smooth muscle cell	-0.136774	1	0.462	0.898649	0	0
222700	Lysinuric Protein Intolerance	bronchial vessel endothelial cell	-0.360594	1	0.663	0.898649	0	0
222700	Lysinuric Protein Intolerance	capillary aerocyte	-0.38672	1	0.76	0.898649	0	0
222700	Lysinuric Protein Intolerance	capillary endothelial cell	-0.384469	1	0.837	0.898649	0	0
222700	Lysinuric Protein Intolerance	classical monocyte	2.35624	1	0.012	0.152	0	0
222700	Lysinuric Protein Intolerance	club cell	-0.49099	1	0.875	0.898649	0	0
222700	Lysinuric Protein Intolerance	dendritic cell	0.113703	1	0.159	0.898649	0	0
222700	Lysinuric Protein Intolerance	endothelial cell of artery	-0.243726	1	0.685	0.898649	0	0
222700	Lysinuric Protein Intolerance	endothelial cell of lymphatic vessel	-0.36845	1	0.675	0.898649	0	0
222700	Lysinuric Protein Intolerance	fibroblast	-0.0629134	1	0.515	0.898649	0	0
222700	Lysinuric Protein Intolerance	intermediate monocyte	3.17373	1	0.001	0.038	1	0
222700	Lysinuric Protein Intolerance	lung ciliated cell	-0.404826	1	0.793	0.898649	0	0
222700	Lysinuric Protein Intolerance	lung microvascular endothelial cell	-0.44567	1	0.816	0.898649	0	0
222700	Lysinuric Protein Intolerance	macrophage	2.75365	1	0.016	0.152	0	0
222700	Lysinuric Protein Intolerance	mesothelial cell	0.263403	1	0.189	0.898649	0	0
222700	Lysinuric Protein Intolerance	myofibroblast cell	-0.213522	1	0.544	0.898649	0	0
222700	Lysinuric Protein Intolerance	neutrophil	-0.17311	1	0.312	0.898649	0	0
222700	Lysinuric Protein Intolerance	nk cell	-0.489429	1	0.821	0.898649	0	0
222700	Lysinuric Protein Intolerance	non-classical monocyte	2.97068	1	0.004	0.076	1	0
222700	Lysinuric Protein Intolerance	pericyte cell	-0.329149	1	0.786	0.898649	0	0
222700	Lysinuric Protein Intolerance	plasma cell	-0.19633	1	0.218	0.898649	0	0
222700	Lysinuric Protein Intolerance	plasmacytoid dendritic cell	-0.58334	1	0.684	0.898649	0	0
222700	Lysinuric Protein Intolerance	pulmonary ionocyte	-0.48909	1	0.771	0.898649	0	0
222700	Lysinuric Protein Intolerance	respiratory goblet cell	-0.424538	1	0.698	0.898649	0	0
222700	Lysinuric Protein Intolerance	respiratory mucous cell	-0.58334	1	0.635	0.898649	0	0
222700	Lysinuric Protein Intolerance	serous cell of epithelium of bronchus	-0.411113	1	0.521	0.898649	0	0
222700	Lysinuric Protein Intolerance	smooth muscle cell	-0.58334	1	0.73	0.898649	0	0
222700	Lysinuric Protein Intolerance	type i pneumocyte	-0.315198	1	0.766	0.898649	0	0
222700	Lysinuric Protein Intolerance	type ii pneumocyte	-0.493745	1	0.795	0.898649	0	0
222700	Lysinuric Protein Intolerance	vascular associated smooth muscle cell	-0.350397	1	0.708	0.898649	0	0
222700	Lysinuric Protein Intolerance	vein endothelial cell	-0.419594	1	0.867	0.898649	0	0
PS162400	Hereditary sensory and autonomic neuropathy	cd8-positive, alpha-beta t cell	0.36747	1	0.231	0.672824	0	0
PS162400	Hereditary sensory and autonomic neuropathy	cd4-positive, alpha-beta t cell	-0.408941	1	0.715	0.985	0	0
PS162400	Hereditary sensory and autonomic neuropathy	adventitial cell	0.023373	1	0.293	0.672824	0	0
PS162400	Hereditary sensory and autonomic neuropathy	alveolar fibroblast	0.204774	1	0.281	0.672824	0	0
PS162400	Hereditary sensory and autonomic neuropathy	b cell	0.751956	1	0.084	0.672824	0	0
PS162400	Hereditary sensory and autonomic neuropathy	basal cell	-0.0192732	1	0.542	0.936182	0	0
PS162400	Hereditary sensory and autonomic neuropathy	basophil	-0.795514	1	0.929	0.985	0	0
PS162400	Hereditary sensory and autonomic neuropathy	bronchial smooth muscle cell	-0.810953	1	0.92	0.985	0	0
PS162400	Hereditary sensory and autonomic neuropathy	bronchial vessel endothelial cell	-0.611773	1	0.857	0.985	0	0
PS162400	Hereditary sensory and autonomic neuropathy	capillary aerocyte	0.408697	1	0.221	0.672824	0	0
PS162400	Hereditary sensory and autonomic neuropathy	capillary endothelial cell	0.554048	1	0.212	0.672824	0	0
PS162400	Hereditary sensory and autonomic neuropathy	classical monocyte	-0.0329246	1	0.381	0.762	0	0
PS162400	Hereditary sensory and autonomic neuropathy	club cell	0.312705	1	0.182	0.672824	0	0
PS162400	Hereditary sensory and autonomic neuropathy	dendritic cell	-0.778489	1	0.889	0.985	0	0
PS162400	Hereditary sensory and autonomic neuropathy	endothelial cell of artery	-0.87344	1	0.974	0.985	0	0
PS162400	Hereditary sensory and autonomic neuropathy	endothelial cell of lymphatic vessel	-0.853885	1	0.928	0.985	0	0
PS162400	Hereditary sensory and autonomic neuropathy	fibroblast	3.90342	1	0.027	0.672824	0	0
PS162400	Hereditary sensory and autonomic neuropathy	intermediate monocyte	-0.41981	1	0.708	0.985	0	0
PS162400	Hereditary sensory and autonomic neuropathy	lung ciliated cell	1.63201	1	0.126	0.672824	0	0
PS162400	Hereditary sensory and autonomic neuropathy	lung microvascular endothelial cell	-0.172506	1	0.502	0.908381	0	0
PS162400	Hereditary sensory and autonomic neuropathy	macrophage	-0.513529	1	0.693	0.985	0	0
PS162400	Hereditary sensory and autonomic neuropathy	mesothelial cell	-0.348565	1	0.594	0.9405	0	0
PS162400	Hereditary sensory and autonomic neuropathy	myofibroblast cell	-1.39957	1	0.975	0.985	0	0
PS162400	Hereditary sensory and autonomic neuropathy	neutrophil	-0.414178	1	0.483	0.908381	0	0
PS162400	Hereditary sensory and autonomic neuropathy	nk cell	0.427064	1	0.263	0.672824	0	0
PS162400	Hereditary sensory and autonomic neuropathy	non-classical monocyte	0.179345	1	0.224	0.672824	0	0
PS162400	Hereditary sensory and autonomic neuropathy	pericyte cell	0.508383	1	0.219	0.672824	0	0
PS162400	Hereditary sensory and autonomic neuropathy	plasma cell	-1.05996	1	0.747	0.985	0	0
PS162400	Hereditary sensory and autonomic neuropathy	plasmacytoid dendritic cell	2.2713	1	0.075	0.672824	0	0
PS162400	Hereditary sensory and autonomic neuropathy	pulmonary ionocyte	-1.39957	1	0.985	0.985	0	0
PS162400	Hereditary sensory and autonomic neuropathy	respiratory goblet cell	-0.105881	1	0.346	0.730444	0	0
PS162400	Hereditary sensory and autonomic neuropathy	respiratory mucous cell	-0.968639	1	0.778	0.985	0	0
PS162400	Hereditary sensory and autonomic neuropathy	serous cell of epithelium of bronchus	0.378625	1	0.105	0.672824	0	0
PS162400	Hereditary sensory and autonomic neuropathy	smooth muscle cell	-0.756155	1	0.837	0.985	0	0
PS162400	Hereditary sensory and autonomic neuropathy	type i pneumocyte	0.857292	1	0.13	0.672824	0	0
PS162400	Hereditary sensory and autonomic neuropathy	type ii pneumocyte	0.0598953	1	0.192	0.672824	0	0
PS162400	Hereditary sensory and autonomic neuropathy	vascular associated smooth muscle cell	0.0226176	1	0.301	0.672824	0	0
PS162400	Hereditary sensory and autonomic neuropathy	vein endothelial cell	-0.119419	1	0.572	0.9405	0	0
224410	Dyssegmental Dysplasia, Silverman-handmaker Type	cd8-positive, alpha-beta t cell	-0.55909	1	0.878	0.901	0	0
224410	Dyssegmental Dysplasia, Silverman-handmaker Type	cd4-positive, alpha-beta t cell	-0.554344	1	0.825	0.901	0	0
224410	Dyssegmental Dysplasia, Silverman-handmaker Type	adventitial cell	0.369903	1	0.176	0.901	0	0
224410	Dyssegmental Dysplasia, Silverman-handmaker Type	alveolar fibroblast	-0.0241161	1	0.461	0.901	0	0
224410	Dyssegmental Dysplasia, Silverman-handmaker Type	b cell	-0.571108	1	0.727	0.901	0	0
224410	Dyssegmental Dysplasia, Silverman-handmaker Type	basal cell	-0.374944	1	0.841	0.901	0	0
224410	Dyssegmental Dysplasia, Silverman-handmaker Type	basophil	-0.380714	1	0.659	0.901	0	0
224410	Dyssegmental Dysplasia, Silverman-handmaker Type	bronchial smooth muscle cell	0.325173	1	0.215	0.901	0	0
224410	Dyssegmental Dysplasia, Silverman-handmaker Type	bronchial vessel endothelial cell	3.43659	1	0.006	0.076	1	0
224410	Dyssegmental Dysplasia, Silverman-handmaker Type	capillary aerocyte	-0.525742	1	0.894	0.901	0	0
224410	Dyssegmental Dysplasia, Silverman-handmaker Type	capillary endothelial cell	-0.391174	1	0.816	0.901	0	0
224410	Dyssegmental Dysplasia, Silverman-handmaker Type	classical monocyte	-0.568686	1	0.816	0.901	0	0
224410	Dyssegmental Dysplasia, Silverman-handmaker Type	club cell	-0.486142	1	0.873	0.901	0	0
224410	Dyssegmental Dysplasia, Silverman-handmaker Type	dendritic cell	-0.577428	1	0.773	0.901	0	0
224410	Dyssegmental Dysplasia, Silverman-handmaker Type	endothelial cell of artery	1.03102	1	0.105	0.901	0	0
224410	Dyssegmental Dysplasia, Silverman-handmaker Type	endothelial cell of lymphatic vessel	0.0970359	1	0.32	0.901	0	0
224410	Dyssegmental Dysplasia, Silverman-handmaker Type	fibroblast	0.189078	1	0.312	0.901	0	0
224410	Dyssegmental Dysplasia, Silverman-handmaker Type	intermediate monocyte	-0.54798	1	0.789	0.901	0	0
224410	Dyssegmental Dysplasia, Silverman-handmaker Type	lung ciliated cell	-0.480577	1	0.84	0.901	0	0
224410	Dyssegmental Dysplasia, Silverman-handmaker Type	lung microvascular endothelial cell	3.18427	1	0.004	0.076	1	0
224410	Dyssegmental Dysplasia, Silverman-handmaker Type	macrophage	-0.574775	1	0.769	0.901	0	0
224410	Dyssegmental Dysplasia, Silverman-handmaker Type	mesothelial cell	-0.55962	1	0.759	0.901	0	0
224410	Dyssegmental Dysplasia, Silverman-handmaker Type	myofibroblast cell	0.0007951	1	0.34	0.901	0	0
224410	Dyssegmental Dysplasia, Silverman-handmaker Type	neutrophil	-0.519797	1	0.566	0.901	0	0
224410	Dyssegmental Dysplasia, Silverman-handmaker Type	nk cell	-0.544194	1	0.862	0.901	0	0
224410	Dyssegmental Dysplasia, Silverman-handmaker Type	non-classical monocyte	-0.571396	1	0.901	0.901	0	0
224410	Dyssegmental Dysplasia, Silverman-handmaker Type	pericyte cell	0.107427	1	0.389	0.901	0	0
224410	Dyssegmental Dysplasia, Silverman-handmaker Type	plasma cell	-0.555782	1	0.469	0.901	0	0
224410	Dyssegmental Dysplasia, Silverman-handmaker Type	plasmacytoid dendritic cell	-0.381789	1	0.566	0.901	0	0
224410	Dyssegmental Dysplasia, Silverman-handmaker Type	pulmonary ionocyte	-0.106088	1	0.521	0.901	0	0
224410	Dyssegmental Dysplasia, Silverman-handmaker Type	respiratory goblet cell	-0.502726	1	0.763	0.901	0	0
224410	Dyssegmental Dysplasia, Silverman-handmaker Type	respiratory mucous cell	-0.441209	1	0.526	0.901	0	0
224410	Dyssegmental Dysplasia, Silverman-handmaker Type	serous cell of epithelium of bronchus	-0.541804	1	0.616	0.901	0	0
224410	Dyssegmental Dysplasia, Silverman-handmaker Type	smooth muscle cell	-0.18655	1	0.452	0.901	0	0
224410	Dyssegmental Dysplasia, Silverman-handmaker Type	type i pneumocyte	0.602793	1	0.191	0.901	0	0
224410	Dyssegmental Dysplasia, Silverman-handmaker Type	type ii pneumocyte	-0.369279	1	0.677	0.901	0	0
224410	Dyssegmental Dysplasia, Silverman-handmaker Type	vascular associated smooth muscle cell	-0.149249	1	0.538	0.901	0	0
224410	Dyssegmental Dysplasia, Silverman-handmaker Type	vein endothelial cell	2.70221	1	0.005	0.076	1	0
226300	Complement Hyperactivation, Angiopathic Thrombosis, And Protein-losing Enteropathy	cd8-positive, alpha-beta t cell	-0.313024	1	0.687	0.884	0	0
226300	Complement Hyperactivation, Angiopathic Thrombosis, And Protein-losing Enteropathy	cd4-positive, alpha-beta t cell	-0.248983	1	0.569	0.884	0	0
226300	Complement Hyperactivation, Angiopathic Thrombosis, And Protein-losing Enteropathy	adventitial cell	0.0735285	1	0.28	0.884	0	0
226300	Complement Hyperactivation, Angiopathic Thrombosis, And Protein-losing Enteropathy	alveolar fibroblast	-0.481182	1	0.861	0.884	0	0
226300	Complement Hyperactivation, Angiopathic Thrombosis, And Protein-losing Enteropathy	b cell	-0.251344	1	0.481	0.884	0	0
226300	Complement Hyperactivation, Angiopathic Thrombosis, And Protein-losing Enteropathy	basal cell	-0.106302	1	0.577	0.884	0	0
226300	Complement Hyperactivation, Angiopathic Thrombosis, And Protein-losing Enteropathy	basophil	-0.229824	1	0.488	0.884	0	0
226300	Complement Hyperactivation, Angiopathic Thrombosis, And Protein-losing Enteropathy	bronchial smooth muscle cell	-0.531084	1	0.805	0.884	0	0
226300	Complement Hyperactivation, Angiopathic Thrombosis, And Protein-losing Enteropathy	bronchial vessel endothelial cell	0.0168706	1	0.312	0.884	0	0
226300	Complement Hyperactivation, Angiopathic Thrombosis, And Protein-losing Enteropathy	capillary aerocyte	-0.410555	1	0.798	0.884	0	0
226300	Complement Hyperactivation, Angiopathic Thrombosis, And Protein-losing Enteropathy	capillary endothelial cell	-0.418883	1	0.838	0.884	0	0
226300	Complement Hyperactivation, Angiopathic Thrombosis, And Protein-losing Enteropathy	classical monocyte	0.147847	1	0.213	0.884	0	0
226300	Complement Hyperactivation, Angiopathic Thrombosis, And Protein-losing Enteropathy	club cell	0.710122	1	0.087	0.884	0	0
226300	Complement Hyperactivation, Angiopathic Thrombosis, And Protein-losing Enteropathy	dendritic cell	-0.384437	1	0.636	0.884	0	0
226300	Complement Hyperactivation, Angiopathic Thrombosis, And Protein-losing Enteropathy	endothelial cell of artery	-0.305594	1	0.726	0.884	0	0
226300	Complement Hyperactivation, Angiopathic Thrombosis, And Protein-losing Enteropathy	endothelial cell of lymphatic vessel	-0.242072	1	0.589	0.884	0	0
226300	Complement Hyperactivation, Angiopathic Thrombosis, And Protein-losing Enteropathy	fibroblast	0.0909638	1	0.372	0.884	0	0
226300	Complement Hyperactivation, Angiopathic Thrombosis, And Protein-losing Enteropathy	intermediate monocyte	-0.0965771	1	0.41	0.884	0	0
226300	Complement Hyperactivation, Angiopathic Thrombosis, And Protein-losing Enteropathy	lung ciliated cell	-0.287829	1	0.688	0.884	0	0
226300	Complement Hyperactivation, Angiopathic Thrombosis, And Protein-losing Enteropathy	lung microvascular endothelial cell	-0.389938	1	0.786	0.884	0	0
226300	Complement Hyperactivation, Angiopathic Thrombosis, And Protein-losing Enteropathy	macrophage	-0.433921	1	0.637	0.884	0	0
226300	Complement Hyperactivation, Angiopathic Thrombosis, And Protein-losing Enteropathy	mesothelial cell	0.00714637	1	0.294	0.884	0	0
226300	Complement Hyperactivation, Angiopathic Thrombosis, And Protein-losing Enteropathy	myofibroblast cell	-0.215518	1	0.555	0.884	0	0
226300	Complement Hyperactivation, Angiopathic Thrombosis, And Protein-losing Enteropathy	neutrophil	4.20259	1	0.027	0.513	0	0
226300	Complement Hyperactivation, Angiopathic Thrombosis, And Protein-losing Enteropathy	nk cell	-0.0361723	1	0.528	0.884	0	0
226300	Complement Hyperactivation, Angiopathic Thrombosis, And Protein-losing Enteropathy	non-classical monocyte	-0.261458	1	0.61	0.884	0	0
226300	Complement Hyperactivation, Angiopathic Thrombosis, And Protein-losing Enteropathy	pericyte cell	-0.520072	1	0.884	0.884	0	0
226300	Complement Hyperactivation, Angiopathic Thrombosis, And Protein-losing Enteropathy	plasma cell	-0.527125	1	0.478	0.884	0	0
226300	Complement Hyperactivation, Angiopathic Thrombosis, And Protein-losing Enteropathy	plasmacytoid dendritic cell	-0.398367	1	0.599	0.884	0	0
226300	Complement Hyperactivation, Angiopathic Thrombosis, And Protein-losing Enteropathy	pulmonary ionocyte	-0.524273	1	0.814	0.884	0	0
226300	Complement Hyperactivation, Angiopathic Thrombosis, And Protein-losing Enteropathy	respiratory goblet cell	0.29145	1	0.097	0.884	0	0
226300	Complement Hyperactivation, Angiopathic Thrombosis, And Protein-losing Enteropathy	respiratory mucous cell	0.0583384	1	0.153	0.884	0	0
226300	Complement Hyperactivation, Angiopathic Thrombosis, And Protein-losing Enteropathy	serous cell of epithelium of bronchus	-0.458969	1	0.572	0.884	0	0
226300	Complement Hyperactivation, Angiopathic Thrombosis, And Protein-losing Enteropathy	smooth muscle cell	-0.522902	1	0.708	0.884	0	0
226300	Complement Hyperactivation, Angiopathic Thrombosis, And Protein-losing Enteropathy	type i pneumocyte	3.85225	1	0.018	0.513	0	0
226300	Complement Hyperactivation, Angiopathic Thrombosis, And Protein-losing Enteropathy	type ii pneumocyte	0.0263283	1	0.226	0.884	0	0
226300	Complement Hyperactivation, Angiopathic Thrombosis, And Protein-losing Enteropathy	vascular associated smooth muscle cell	-0.54492	1	0.84	0.884	0	0
226300	Complement Hyperactivation, Angiopathic Thrombosis, And Protein-losing Enteropathy	vein endothelial cell	-0.336118	1	0.776	0.884	0	0
230800	Gaucher Disease, Type I	cd8-positive, alpha-beta t cell	-0.0486586	1	0.509	0.922	0	0
230800	Gaucher Disease, Type I	cd4-positive, alpha-beta t cell	-0.626713	1	0.882	0.922	0	0
230800	Gaucher Disease, Type I	adventitial cell	-0.36651	1	0.67	0.922	0	0
230800	Gaucher Disease, Type I	alveolar fibroblast	0.90196	1	0.1	0.57	0	0
230800	Gaucher Disease, Type I	b cell	-0.747923	1	0.815	0.922	0	0
230800	Gaucher Disease, Type I	basal cell	-0.371267	1	0.819	0.922	0	0
230800	Gaucher Disease, Type I	basophil	-0.0333726	1	0.339	0.922	0	0
230800	Gaucher Disease, Type I	bronchial smooth muscle cell	-0.747923	1	0.903	0.922	0	0
230800	Gaucher Disease, Type I	bronchial vessel endothelial cell	-0.747923	1	0.911	0.922	0	0
230800	Gaucher Disease, Type I	capillary aerocyte	-0.177485	1	0.578	0.922	0	0
230800	Gaucher Disease, Type I	capillary endothelial cell	-0.417888	1	0.85	0.922	0	0
230800	Gaucher Disease, Type I	classical monocyte	0.00617812	1	0.214	0.903556	0	1
230800	Gaucher Disease, Type I	club cell	-0.397814	1	0.78	0.922	0	0
230800	Gaucher Disease, Type I	dendritic cell	0.00933575	1	0.202	0.903556	0	0
230800	Gaucher Disease, Type I	endothelial cell of artery	-0.247669	1	0.693	0.922	0	0
230800	Gaucher Disease, Type I	endothelial cell of lymphatic vessel	3.11116	1	0.027	0.57	0	0
230800	Gaucher Disease, Type I	fibroblast	3.35594	1	0.052	0.57	0	0
230800	Gaucher Disease, Type I	intermediate monocyte	0.718761	1	0.094	0.57	0	0
230800	Gaucher Disease, Type I	lung ciliated cell	-0.256412	1	0.693	0.922	0	0
230800	Gaucher Disease, Type I	lung microvascular endothelial cell	-0.364784	1	0.741	0.922	0	0
230800	Gaucher Disease, Type I	macrophage	0.553846	1	0.091	0.57	0	1
230800	Gaucher Disease, Type I	mesothelial cell	-0.747923	1	0.845	0.922	0	0
[truncated: 5,526 more rows]

## Sheet: Skeletal muscle
Supplementary File 2D. Diseases and their PrEDiCT scores across cell types in skeletal muscle.
Disease\Phenotypic series accession (OMIM)	Disease name (OMIM)	Cell type name	PrEDiCT score	Number of causal genes	P value	FDR	Cell type likely affected by disease (1=Yes, 0=No)	Literature co-appearance (1=Yes, 0=No)	Expert curation (1=Affected, 0=Unaffected, NA=Undetermined)
100100	Abdominal Muscles, Absence Of, With Urinary Tract Abnormality Andcryptorchidism	capillary endothelial cell	0.0191724	1	0.287	0.778	0	0
100100	Abdominal Muscles, Absence Of, With Urinary Tract Abnormality Andcryptorchidism	cd4-positive, alpha-beta t cell	-0.285032	1	0.632	0.778	0	0
100100	Abdominal Muscles, Absence Of, With Urinary Tract Abnormality Andcryptorchidism	cd8-positive, alpha-beta t cell	-0.285032	1	0.658	0.778	0	0
100100	Abdominal Muscles, Absence Of, With Urinary Tract Abnormality Andcryptorchidism	endothelial cell of artery	4.07791	1	0	0	1	0
100100	Abdominal Muscles, Absence Of, With Urinary Tract Abnormality Andcryptorchidism	endothelial cell of lymphatic vessel	0.354145	1	0.258	0.778	0	0
100100	Abdominal Muscles, Absence Of, With Urinary Tract Abnormality Andcryptorchidism	endothelial cell of vascular tree	-0.270072	1	0.745	0.778	0	0
100100	Abdominal Muscles, Absence Of, With Urinary Tract Abnormality Andcryptorchidism	erythrocyte	-0.285032	1	0.397	0.778	0	0
100100	Abdominal Muscles, Absence Of, With Urinary Tract Abnormality Andcryptorchidism	fast muscle cell	-0.285032	1	0.532	0.778	0	0
100100	Abdominal Muscles, Absence Of, With Urinary Tract Abnormality Andcryptorchidism	macrophage	-0.27735	1	0.68	0.778	0	0
100100	Abdominal Muscles, Absence Of, With Urinary Tract Abnormality Andcryptorchidism	mast cell	-0.285032	1	0.597	0.778	0	0
100100	Abdominal Muscles, Absence Of, With Urinary Tract Abnormality Andcryptorchidism	mature nk t cell	-0.285032	1	0.699	0.778	0	0
100100	Abdominal Muscles, Absence Of, With Urinary Tract Abnormality Andcryptorchidism	mesenchymal stem cell	-0.285032	1	0.765	0.778	0	0
100100	Abdominal Muscles, Absence Of, With Urinary Tract Abnormality Andcryptorchidism	mesothelial cell	-0.285032	1	0.63	0.778	0	0
100100	Abdominal Muscles, Absence Of, With Urinary Tract Abnormality Andcryptorchidism	pericyte cell	-0.201334	1	0.778	0.778	0	0
100100	Abdominal Muscles, Absence Of, With Urinary Tract Abnormality Andcryptorchidism	skeletal muscle satellite stem cell	-0.282079	1	0.775	0.778	0	0
100100	Abdominal Muscles, Absence Of, With Urinary Tract Abnormality Andcryptorchidism	slow muscle cell	-0.285032	1	0.604	0.778	0	0
100100	Abdominal Muscles, Absence Of, With Urinary Tract Abnormality Andcryptorchidism	smooth muscle cell	-0.285032	1	0.738	0.778	0	0
100100	Abdominal Muscles, Absence Of, With Urinary Tract Abnormality Andcryptorchidism	t cell	-0.285032	1	0.718	0.778	0	0
100100	Abdominal Muscles, Absence Of, With Urinary Tract Abnormality Andcryptorchidism	tendon cell	-0.285032	1	0.77	0.778	0	0
PS100300	Adams-Oliver syndrome	capillary endothelial cell	2.20826	2	0.001	0.019	1	0
PS100300	Adams-Oliver syndrome	cd4-positive, alpha-beta t cell	-0.594598	2	0.922	0.979	0	0
PS100300	Adams-Oliver syndrome	cd8-positive, alpha-beta t cell	-0.601392	2	0.87	0.979	0	0
PS100300	Adams-Oliver syndrome	endothelial cell of artery	1.85785	2	0.011	0.1045	0	0
PS100300	Adams-Oliver syndrome	endothelial cell of lymphatic vessel	1.36048	2	0.035	0.16625	0	0
PS100300	Adams-Oliver syndrome	endothelial cell of vascular tree	1.11744	2	0.034	0.16625	0	0
PS100300	Adams-Oliver syndrome	erythrocyte	-0.357499	2	0.279	0.8835	0	0
PS100300	Adams-Oliver syndrome	fast muscle cell	-0.651069	2	0.828	0.979	0	0
PS100300	Adams-Oliver syndrome	macrophage	-0.243961	2	0.75	0.979	0	0
PS100300	Adams-Oliver syndrome	mast cell	-0.66159	2	0.809	0.979	0	0
PS100300	Adams-Oliver syndrome	mature nk t cell	-0.66159	2	0.948	0.979	0	0
PS100300	Adams-Oliver syndrome	mesenchymal stem cell	-0.460652	2	0.965	0.979	0	0
PS100300	Adams-Oliver syndrome	mesothelial cell	-0.66159	2	0.897	0.979	0	0
PS100300	Adams-Oliver syndrome	pericyte cell	0.758479	2	0.063	0.2394	0	0
PS100300	Adams-Oliver syndrome	skeletal muscle satellite stem cell	-0.525053	2	0.979	0.979	0	0
PS100300	Adams-Oliver syndrome	slow muscle cell	-0.66159	2	0.86	0.979	0	0
PS100300	Adams-Oliver syndrome	smooth muscle cell	-0.425264	2	0.893	0.979	0	0
PS100300	Adams-Oliver syndrome	t cell	-0.580461	2	0.951	0.979	0	0
PS100300	Adams-Oliver syndrome	tendon cell	-0.216198	2	0.782	0.979	0	0
103050	Adenylosuccinase Deficiency	capillary endothelial cell	-0.337331	1	0.829	0.934	0	0
103050	Adenylosuccinase Deficiency	cd4-positive, alpha-beta t cell	-0.0465902	1	0.571	0.934	0	0
103050	Adenylosuccinase Deficiency	cd8-positive, alpha-beta t cell	-0.43121	1	0.769	0.934	0	0
103050	Adenylosuccinase Deficiency	endothelial cell of artery	-0.467588	1	0.91	0.934	0	0
103050	Adenylosuccinase Deficiency	endothelial cell of lymphatic vessel	-0.269463	1	0.8	0.934	0	0
103050	Adenylosuccinase Deficiency	endothelial cell of vascular tree	-0.380731	1	0.81	0.934	0	0
103050	Adenylosuccinase Deficiency	erythrocyte	-0.627719	1	0.521	0.934	0	0
103050	Adenylosuccinase Deficiency	fast muscle cell	3.57886	1	0.005	0.095	1	0
103050	Adenylosuccinase Deficiency	macrophage	-0.425965	1	0.807	0.934	0	0
103050	Adenylosuccinase Deficiency	mast cell	0.131323	1	0.155	0.934	0	0
103050	Adenylosuccinase Deficiency	mature nk t cell	0.170925	1	0.224	0.934	0	0
103050	Adenylosuccinase Deficiency	mesenchymal stem cell	-0.405507	1	0.872	0.934	0	0
103050	Adenylosuccinase Deficiency	mesothelial cell	-0.367265	1	0.682	0.934	0	0
103050	Adenylosuccinase Deficiency	pericyte cell	-0.42915	1	0.934	0.934	0	0
103050	Adenylosuccinase Deficiency	skeletal muscle satellite stem cell	-0.225163	1	0.718	0.934	0	0
103050	Adenylosuccinase Deficiency	slow muscle cell	1.68848	1	0.08	0.76	0	0
103050	Adenylosuccinase Deficiency	smooth muscle cell	-0.377612	1	0.79	0.934	0	0
103050	Adenylosuccinase Deficiency	t cell	-0.412675	1	0.796	0.934	0	0
103050	Adenylosuccinase Deficiency	tendon cell	-0.365616	1	0.843	0.934	0	0
105120	Amyloidosis V	capillary endothelial cell	0.453619	1	0.193	0.8075	0	0
105120	Amyloidosis V	cd4-positive, alpha-beta t cell	-0.565378	1	0.804	0.898	0	0
105120	Amyloidosis V	cd8-positive, alpha-beta t cell	-0.569632	1	0.79	0.898	0	0
105120	Amyloidosis V	endothelial cell of artery	0.259591	1	0.255	0.8075	0	0
105120	Amyloidosis V	endothelial cell of lymphatic vessel	-0.385224	1	0.861	0.898	0	0
105120	Amyloidosis V	endothelial cell of vascular tree	0.314002	1	0.182	0.8075	0	0
105120	Amyloidosis V	erythrocyte	-0.507843	1	0.501	0.898	0	0
105120	Amyloidosis V	fast muscle cell	-0.540673	1	0.699	0.898	0	0
105120	Amyloidosis V	macrophage	-0.397332	1	0.807	0.898	0	0
105120	Amyloidosis V	mast cell	-0.494704	1	0.669	0.898	0	0
105120	Amyloidosis V	mature nk t cell	-0.568371	1	0.832	0.898	0	0
105120	Amyloidosis V	mesenchymal stem cell	3.52851	1	0.003	0.057	1	0
105120	Amyloidosis V	mesothelial cell	-0.514077	1	0.751	0.898	0	0
105120	Amyloidosis V	pericyte cell	0.255634	1	0.241	0.8075	0	0
105120	Amyloidosis V	skeletal muscle satellite stem cell	-0.480124	1	0.898	0.898	0	0
105120	Amyloidosis V	slow muscle cell	-0.498465	1	0.668	0.898	0	0
105120	Amyloidosis V	smooth muscle cell	-0.146995	1	0.67	0.898	0	0
105120	Amyloidosis V	t cell	-0.548918	1	0.86	0.898	0	0
105120	Amyloidosis V	tendon cell	1.40638	1	0.05	0.475	0	0
PS105400	Amyotrophic lateral sclerosis	capillary endothelial cell	-0.245714	21	0.995	1	0	0
PS105400	Amyotrophic lateral sclerosis	cd4-positive, alpha-beta t cell	-0.267194	21	0.899	1	0	0
PS105400	Amyotrophic lateral sclerosis	cd8-positive, alpha-beta t cell	-0.215247	21	0.849	1	0	0
PS105400	Amyotrophic lateral sclerosis	endothelial cell of artery	0.0414231	21	0.023	0.0874	0	0
PS105400	Amyotrophic lateral sclerosis	endothelial cell of lymphatic vessel	-0.047164	21	0.972	1	0	0
PS105400	Amyotrophic lateral sclerosis	endothelial cell of vascular tree	-0.0766059	21	0.896	1	0	0
PS105400	Amyotrophic lateral sclerosis	erythrocyte	-1.6095	21	1	1	0	0
PS105400	Amyotrophic lateral sclerosis	fast muscle cell	-0.398624	21	0.865	1	0	0
PS105400	Amyotrophic lateral sclerosis	macrophage	0.0473629	21	0.001	0.019	0	0
PS105400	Amyotrophic lateral sclerosis	mast cell	-0.125528	21	0.659	1	0	0
PS105400	Amyotrophic lateral sclerosis	mature nk t cell	-0.180727	21	0.918	1	0	0
PS105400	Amyotrophic lateral sclerosis	mesenchymal stem cell	-0.186174	21	0.977	1	0	0
PS105400	Amyotrophic lateral sclerosis	mesothelial cell	-0.563292	21	0.998	1	0	0
PS105400	Amyotrophic lateral sclerosis	pericyte cell	0.133812	21	0.013	0.06175	0	0
PS105400	Amyotrophic lateral sclerosis	skeletal muscle satellite stem cell	-0.107675	21	0.958	1	0	0
PS105400	Amyotrophic lateral sclerosis	slow muscle cell	-0.515426	21	0.971	1	0	0
PS105400	Amyotrophic lateral sclerosis	smooth muscle cell	0.0951926	21	0.004	0.0253333	0	0
PS105400	Amyotrophic lateral sclerosis	t cell	0.233879	21	0.002	0.019	0	0
PS105400	Amyotrophic lateral sclerosis	tendon cell	-0.290039	21	0.998	1	0	0
105500	Amyotrophic Lateral Sclerosis-parkinsonism/dementia Complex 1	capillary endothelial cell	-0.179214	1	0.726	0.981	0	0
105500	Amyotrophic Lateral Sclerosis-parkinsonism/dementia Complex 1	cd4-positive, alpha-beta t cell	0.0113809	1	0.175	0.415625	0	0
105500	Amyotrophic Lateral Sclerosis-parkinsonism/dementia Complex 1	cd8-positive, alpha-beta t cell	-0.421817	1	0.735	0.981	0	0
105500	Amyotrophic Lateral Sclerosis-parkinsonism/dementia Complex 1	endothelial cell of artery	-0.593897	1	0.94	0.981	0	0
105500	Amyotrophic Lateral Sclerosis-parkinsonism/dementia Complex 1	endothelial cell of lymphatic vessel	1.55185	1	0.045	0.415625	0	0
105500	Amyotrophic Lateral Sclerosis-parkinsonism/dementia Complex 1	endothelial cell of vascular tree	-0.185329	1	0.676	0.981	0	0
105500	Amyotrophic Lateral Sclerosis-parkinsonism/dementia Complex 1	erythrocyte	-1.88912	1	0.927	0.981	0	0
105500	Amyotrophic Lateral Sclerosis-parkinsonism/dementia Complex 1	fast muscle cell	-1.38659	1	0.958	0.981	0	0
105500	Amyotrophic Lateral Sclerosis-parkinsonism/dementia Complex 1	macrophage	1.53053	1	0.079	0.415625	0	0
105500	Amyotrophic Lateral Sclerosis-parkinsonism/dementia Complex 1	mast cell	-0.502458	1	0.682	0.981	0	0
105500	Amyotrophic Lateral Sclerosis-parkinsonism/dementia Complex 1	mature nk t cell	0.763479	1	0.147	0.415625	0	0
105500	Amyotrophic Lateral Sclerosis-parkinsonism/dementia Complex 1	mesenchymal stem cell	0.503434	1	0.133	0.415625	0	0
105500	Amyotrophic Lateral Sclerosis-parkinsonism/dementia Complex 1	mesothelial cell	0.282408	1	0.156	0.415625	0	0
105500	Amyotrophic Lateral Sclerosis-parkinsonism/dementia Complex 1	pericyte cell	-0.613297	1	0.981	0.981	0	0
105500	Amyotrophic Lateral Sclerosis-parkinsonism/dementia Complex 1	skeletal muscle satellite stem cell	0.541733	1	0.139	0.415625	0	0
105500	Amyotrophic Lateral Sclerosis-parkinsonism/dementia Complex 1	slow muscle cell	-1.2441	1	0.943	0.981	0	0
105500	Amyotrophic Lateral Sclerosis-parkinsonism/dementia Complex 1	smooth muscle cell	-0.269943	1	0.753	0.981	0	0
105500	Amyotrophic Lateral Sclerosis-parkinsonism/dementia Complex 1	t cell	1.91498	1	0.038	0.415625	0	0
105500	Amyotrophic Lateral Sclerosis-parkinsonism/dementia Complex 1	tendon cell	0.185983	1	0.209	0.441222	0	0
PS105550	Frontotemporal dementia and/or Amyotrophic Lateral Sclerosis	capillary endothelial cell	0.385494	5	0.055	0.3002	0	0
PS105550	Frontotemporal dementia and/or Amyotrophic Lateral Sclerosis	cd4-positive, alpha-beta t cell	-0.267194	5	0.754	0.985	0	0
PS105550	Frontotemporal dementia and/or Amyotrophic Lateral Sclerosis	cd8-positive, alpha-beta t cell	-0.384541	5	0.863	0.985	0	0
PS105550	Frontotemporal dementia and/or Amyotrophic Lateral Sclerosis	endothelial cell of artery	0.329298	5	0.076	0.3002	0	0
PS105550	Frontotemporal dementia and/or Amyotrophic Lateral Sclerosis	endothelial cell of lymphatic vessel	-0.0933817	5	0.874	0.985	0	0
PS105550	Frontotemporal dementia and/or Amyotrophic Lateral Sclerosis	endothelial cell of vascular tree	-0.0766059	5	0.724	0.985	0	0
PS105550	Frontotemporal dementia and/or Amyotrophic Lateral Sclerosis	erythrocyte	-1.67672	5	0.982	0.985	0	0
PS105550	Frontotemporal dementia and/or Amyotrophic Lateral Sclerosis	fast muscle cell	-0.218397	5	0.588	0.985	0	0
PS105550	Frontotemporal dementia and/or Amyotrophic Lateral Sclerosis	macrophage	0.776866	5	0.02	0.19	0	0
PS105550	Frontotemporal dementia and/or Amyotrophic Lateral Sclerosis	mast cell	1.85581	5	0.002	0.038	1	0
PS105550	Frontotemporal dementia and/or Amyotrophic Lateral Sclerosis	mature nk t cell	-0.326629	5	0.859	0.985	0	0
PS105550	Frontotemporal dementia and/or Amyotrophic Lateral Sclerosis	mesenchymal stem cell	-0.294597	5	0.936	0.985	0	0
PS105550	Frontotemporal dementia and/or Amyotrophic Lateral Sclerosis	mesothelial cell	-0.416895	5	0.831	0.985	0	0
PS105550	Frontotemporal dementia and/or Amyotrophic Lateral Sclerosis	pericyte cell	-0.106159	5	0.895	0.985	0	0
PS105550	Frontotemporal dementia and/or Amyotrophic Lateral Sclerosis	skeletal muscle satellite stem cell	-0.162834	5	0.82	0.985	0	0
PS105550	Frontotemporal dementia and/or Amyotrophic Lateral Sclerosis	slow muscle cell	-0.346738	5	0.708	0.985	0	0
PS105550	Frontotemporal dementia and/or Amyotrophic Lateral Sclerosis	smooth muscle cell	-0.180167	5	0.825	0.985	0	0
PS105550	Frontotemporal dementia and/or Amyotrophic Lateral Sclerosis	t cell	0.233879	5	0.079	0.3002	0	0
PS105550	Frontotemporal dementia and/or Amyotrophic Lateral Sclerosis	tendon cell	-0.444298	5	0.985	0.985	0	0
105830	Angelman Syndrome	capillary endothelial cell	0.00308266	1	0.3	0.518182	0	0
105830	Angelman Syndrome	cd4-positive, alpha-beta t cell	-0.982906	1	0.956	0.992	0	0
105830	Angelman Syndrome	cd8-positive, alpha-beta t cell	-0.0087079	1	0.562	0.889833	0	0
105830	Angelman Syndrome	endothelial cell of artery	-0.266078	1	0.786	0.992	0	0
105830	Angelman Syndrome	endothelial cell of lymphatic vessel	0.161032	1	0.269	0.5111	0	0
105830	Angelman Syndrome	endothelial cell of vascular tree	0.405152	1	0.167	0.5111	0	0
105830	Angelman Syndrome	erythrocyte	-2.31683	1	0.974	0.992	0	0
105830	Angelman Syndrome	fast muscle cell	0.678263	1	0.108	0.5111	0	0
105830	Angelman Syndrome	macrophage	0.0415345	1	0.252	0.5111	0	0
105830	Angelman Syndrome	mast cell	-1.91976	1	0.992	0.992	0	0
105830	Angelman Syndrome	mature nk t cell	0.352603	1	0.228	0.5111	0	0
105830	Angelman Syndrome	mesenchymal stem cell	-0.0569534	1	0.645	0.905214	0	0
105830	Angelman Syndrome	mesothelial cell	-0.739952	1	0.847	0.992	0	0
105830	Angelman Syndrome	pericyte cell	0.331383	1	0.236	0.5111	0	0
105830	Angelman Syndrome	skeletal muscle satellite stem cell	1.82201	1	0.032	0.5111	0	0
105830	Angelman Syndrome	slow muscle cell	1.60908	1	0.09	0.5111	0	0
105830	Angelman Syndrome	smooth muscle cell	0.550146	1	0.167	0.5111	0	0
105830	Angelman Syndrome	t cell	0.488449	1	0.208	0.5111	0	0
105830	Angelman Syndrome	tendon cell	-0.151543	1	0.667	0.905214	0	0
PS108120	Arthrogryposis, distal	capillary endothelial cell	-0.335132	5	0.937	0.947	0	0
PS108120	Arthrogryposis, distal	cd4-positive, alpha-beta t cell	-0.328369	5	0.791	0.947	0	0
PS108120	Arthrogryposis, distal	cd8-positive, alpha-beta t cell	-0.315407	5	0.8	0.947	0	0
PS108120	Arthrogryposis, distal	endothelial cell of artery	-0.315003	5	0.947	0.947	0	0
PS108120	Arthrogryposis, distal	endothelial cell of lymphatic vessel	-0.238841	5	0.916	0.947	0	0
PS108120	Arthrogryposis, distal	endothelial cell of vascular tree	-0.332588	5	0.924	0.947	0	0
PS108120	Arthrogryposis, distal	erythrocyte	-0.329054	5	0.363	0.947	0	0
PS108120	Arthrogryposis, distal	fast muscle cell	3.12614	5	0	0	1	0
PS108120	Arthrogryposis, distal	macrophage	-0.333384	5	0.885	0.947	0	0
PS108120	Arthrogryposis, distal	mast cell	-0.343569	5	0.703	0.947	0	0
PS108120	Arthrogryposis, distal	mature nk t cell	-0.343569	5	0.879	0.947	0	0
PS108120	Arthrogryposis, distal	mesenchymal stem cell	-0.319139	5	0.941	0.947	0	0
PS108120	Arthrogryposis, distal	mesothelial cell	-0.240765	5	0.684	0.947	0	0
PS108120	Arthrogryposis, distal	pericyte cell	-0.236541	5	0.947	0.947	0	0
PS108120	Arthrogryposis, distal	skeletal muscle satellite stem cell	-0.326548	5	0.945	0.947	0	0
PS108120	Arthrogryposis, distal	slow muscle cell	-0.1253	5	0.577	0.947	0	0
PS108120	Arthrogryposis, distal	smooth muscle cell	-0.236718	5	0.869	0.947	0	0
PS108120	Arthrogryposis, distal	t cell	-0.338463	5	0.889	0.947	0	0
PS108120	Arthrogryposis, distal	tendon cell	-0.236226	5	0.886	0.947	0	0
PS160120	Episodic ataxia	capillary endothelial cell	-0.268532	2	0.835	0.876	0	0
PS160120	Episodic ataxia	cd4-positive, alpha-beta t cell	-0.270703	2	0.64	0.876	0	0
PS160120	Episodic ataxia	cd8-positive, alpha-beta t cell	-0.122186	2	0.518	0.876	0	0
PS160120	Episodic ataxia	endothelial cell of artery	-0.291644	2	0.876	0.876	0	0
PS160120	Episodic ataxia	endothelial cell of lymphatic vessel	-0.145393	2	0.746	0.876	0	0
PS160120	Episodic ataxia	endothelial cell of vascular tree	-0.304488	2	0.844	0.876	0	0
PS160120	Episodic ataxia	erythrocyte	-0.365421	2	0.273	0.876	0	0
PS160120	Episodic ataxia	fast muscle cell	-0.12178	2	0.38	0.876	0	0
PS160120	Episodic ataxia	macrophage	1.88233	2	0.028	0.266	0	0
PS160120	Episodic ataxia	mast cell	-0.365421	2	0.628	0.876	0	0
PS160120	Episodic ataxia	mature nk t cell	-0.251296	2	0.703	0.876	0	0
PS160120	Episodic ataxia	mesenchymal stem cell	-0.0822303	2	0.616	0.876	0	0
PS160120	Episodic ataxia	mesothelial cell	-0.365421	2	0.695	0.876	0	0
PS160120	Episodic ataxia	pericyte cell	0.219483	2	0.302	0.876	0	0
PS160120	Episodic ataxia	skeletal muscle satellite stem cell	-0.195471	2	0.751	0.876	0	0
PS160120	Episodic ataxia	slow muscle cell	-0.24832	2	0.554	0.876	0	0
PS160120	Episodic ataxia	smooth muscle cell	1.84738	2	0.011	0.209	0	0
PS160120	Episodic ataxia	t cell	-0.296091	2	0.834	0.876	0	0
PS160120	Episodic ataxia	tendon cell	-0.254792	2	0.811	0.876	0	0
PS108600	Spastic ataxia	capillary endothelial cell	-0.317479	7	0.962	0.989	0	0
PS108600	Spastic ataxia	cd4-positive, alpha-beta t cell	-0.508046	7	0.945	0.989	0	0
PS108600	Spastic ataxia	cd8-positive, alpha-beta t cell	-0.640979	7	0.977	0.989	0	0
PS108600	Spastic ataxia	endothelial cell of artery	-0.316403	7	0.967	0.989	0	0
PS108600	Spastic ataxia	endothelial cell of lymphatic vessel	-0.115804	7	0.912	0.989	0	0
PS108600	Spastic ataxia	endothelial cell of vascular tree	0.0632319	7	0.083	0.3154	0	0
PS108600	Spastic ataxia	erythrocyte	-1.22547	7	0.909	0.989	0	0
PS108600	Spastic ataxia	fast muscle cell	0.295074	7	0.007	0.0443333	0	0
PS108600	Spastic ataxia	macrophage	-0.320907	7	0.911	0.989	0	0
PS108600	Spastic ataxia	mast cell	-0.812288	7	0.965	0.989	0	0
PS108600	Spastic ataxia	mature nk t cell	-0.639453	7	0.989	0.989	0	0
PS108600	Spastic ataxia	mesenchymal stem cell	0.180373	7	0.042	0.1995	0	0
PS108600	Spastic ataxia	mesothelial cell	-0.640979	7	0.978	0.989	0	0
PS108600	Spastic ataxia	pericyte cell	-0.0378487	7	0.861	0.989	0	0
PS108600	Spastic ataxia	skeletal muscle satellite stem cell	1.07303	7	0.003	0.0443333	1	0
PS108600	Spastic ataxia	slow muscle cell	0.598245	7	0.007	0.0443333	0	0
PS108600	Spastic ataxia	smooth muscle cell	-0.174779	7	0.836	0.989	0	0
PS108600	Spastic ataxia	t cell	-0.27902	7	0.897	0.989	0	0
PS108600	Spastic ataxia	tendon cell	-0.383218	7	0.983	0.989	0	0
PS164400	Spinocerebellar ataxia	capillary endothelial cell	-0.124593	10	0.901	0.988	0	0
PS164400	Spinocerebellar ataxia	cd4-positive, alpha-beta t cell	0.24402	10	0.005	0.057	0	0
PS164400	Spinocerebellar ataxia	cd8-positive, alpha-beta t cell	0.146537	10	0.01	0.0633333	0	0
PS164400	Spinocerebellar ataxia	endothelial cell of artery	-0.229922	10	0.974	0.988	0	0
PS164400	Spinocerebellar ataxia	endothelial cell of lymphatic vessel	-0.243958	10	0.988	0.988	0	0
PS164400	Spinocerebellar ataxia	endothelial cell of vascular tree	-0.284356	10	0.978	0.988	0	0
PS164400	Spinocerebellar ataxia	erythrocyte	-1.02071	10	0.881	0.988	0	0
PS164400	Spinocerebellar ataxia	fast muscle cell	-0.676243	10	0.968	0.988	0	0
PS164400	Spinocerebellar ataxia	macrophage	-0.277718	10	0.922	0.988	0	0
PS164400	Spinocerebellar ataxia	mast cell	-0.520267	10	0.93	0.988	0	0
PS164400	Spinocerebellar ataxia	mature nk t cell	0.324083	10	0.032	0.152	0	0
PS164400	Spinocerebellar ataxia	mesenchymal stem cell	-0.202747	10	0.957	0.988	0	0
PS164400	Spinocerebellar ataxia	mesothelial cell	-0.280582	10	0.807	0.988	0	0
PS164400	Spinocerebellar ataxia	pericyte cell	0.0447418	10	0.165	0.5225	0	0
PS164400	Spinocerebellar ataxia	skeletal muscle satellite stem cell	0.105916	10	0.045	0.171	0	0
PS164400	Spinocerebellar ataxia	slow muscle cell	-0.653148	10	0.973	0.988	0	0
PS164400	Spinocerebellar ataxia	smooth muscle cell	-0.2479	10	0.966	0.988	0	0
PS164400	Spinocerebellar ataxia	t cell	0.603919	10	0.006	0.057	0	0
PS164400	Spinocerebellar ataxia	tendon cell	-0.211203	10	0.94	0.988	0	0
109400	Basal Cell Nevus Syndrome	capillary endothelial cell	0.655425	2	0.111	0.608	0	0
109400	Basal Cell Nevus Syndrome	cd4-positive, alpha-beta t cell	-0.159556	2	0.57	0.9025	0	0
109400	Basal Cell Nevus Syndrome	cd8-positive, alpha-beta t cell	0.339306	2	0.16	0.608	0	0
109400	Basal Cell Nevus Syndrome	endothelial cell of artery	1.75489	2	0.016	0.304	0	0
109400	Basal Cell Nevus Syndrome	endothelial cell of lymphatic vessel	0.101897	2	0.406	0.7714	0	0
109400	Basal Cell Nevus Syndrome	endothelial cell of vascular tree	-0.295058	2	0.839	0.983529	0	0
109400	Basal Cell Nevus Syndrome	erythrocyte	-1.24629	2	0.832	0.983529	0	0
109400	Basal Cell Nevus Syndrome	fast muscle cell	-0.599069	2	0.79	0.983529	0	0
109400	Basal Cell Nevus Syndrome	macrophage	-0.0213144	2	0.489	0.844636	0	0
109400	Basal Cell Nevus Syndrome	mast cell	-0.483327	2	0.686	0.983529	0	0
109400	Basal Cell Nevus Syndrome	mature nk t cell	0.762739	2	0.139	0.608	0	0
109400	Basal Cell Nevus Syndrome	mesenchymal stem cell	0.013901	2	0.376	0.7714	0	0
109400	Basal Cell Nevus Syndrome	mesothelial cell	-0.684825	2	0.88	0.983529	0	0
109400	Basal Cell Nevus Syndrome	pericyte cell	0.0715985	2	0.402	0.7714	0	0
109400	Basal Cell Nevus Syndrome	skeletal muscle satellite stem cell	-0.475167	2	0.973	0.989	0	0
109400	Basal Cell Nevus Syndrome	slow muscle cell	-1.24629	2	0.989	0.989	0	0
109400	Basal Cell Nevus Syndrome	smooth muscle cell	1.16903	2	0.071	0.608	0	0
109400	Basal Cell Nevus Syndrome	t cell	0.244039	2	0.272	0.7714	0	0
109400	Basal Cell Nevus Syndrome	tendon cell	0.0980795	2	0.346	0.7714	0	0
112250	Diaphyseal Medullary Stenosis With Malignant Fibrous Histiocytoma	capillary endothelial cell	0.267326	1	0.225	0.475	0	0
112250	Diaphyseal Medullary Stenosis With Malignant Fibrous Histiocytoma	cd4-positive, alpha-beta t cell	-0.0108706	1	0.567	0.979364	0	0
112250	Diaphyseal Medullary Stenosis With Malignant Fibrous Histiocytoma	cd8-positive, alpha-beta t cell	-1.36325	1	0.982	0.982	0	0
112250	Diaphyseal Medullary Stenosis With Malignant Fibrous Histiocytoma	endothelial cell of artery	0.187521	1	0.248	0.475	0	0
112250	Diaphyseal Medullary Stenosis With Malignant Fibrous Histiocytoma	endothelial cell of lymphatic vessel	-0.38652	1	0.889	0.982	0	0
112250	Diaphyseal Medullary Stenosis With Malignant Fibrous Histiocytoma	endothelial cell of vascular tree	0.401234	1	0.167	0.475	0	0
112250	Diaphyseal Medullary Stenosis With Malignant Fibrous Histiocytoma	erythrocyte	-1.36325	1	0.771	0.982	0	0
112250	Diaphyseal Medullary Stenosis With Malignant Fibrous Histiocytoma	fast muscle cell	-0.960139	1	0.857	0.982	0	0
112250	Diaphyseal Medullary Stenosis With Malignant Fibrous Histiocytoma	macrophage	0.575821	1	0.175	0.475	0	0
112250	Diaphyseal Medullary Stenosis With Malignant Fibrous Histiocytoma	mast cell	-1.36325	1	0.924	0.982	0	0
112250	Diaphyseal Medullary Stenosis With Malignant Fibrous Histiocytoma	mature nk t cell	0.0601456	1	0.25	0.475	0	0
112250	Diaphyseal Medullary Stenosis With Malignant Fibrous Histiocytoma	mesenchymal stem cell	1.26927	1	0.053	0.3838	0	0
112250	Diaphyseal Medullary Stenosis With Malignant Fibrous Histiocytoma	mesothelial cell	-0.348345	1	0.639	0.982	0	0
112250	Diaphyseal Medullary Stenosis With Malignant Fibrous Histiocytoma	pericyte cell	0.730311	1	0.101	0.3838	0	0
112250	Diaphyseal Medullary Stenosis With Malignant Fibrous Histiocytoma	skeletal muscle satellite stem cell	0.840294	1	0.1	0.3838	0	0
112250	Diaphyseal Medullary Stenosis With Malignant Fibrous Histiocytoma	slow muscle cell	-1.36325	1	0.956	0.982	0	0
112250	Diaphyseal Medullary Stenosis With Malignant Fibrous Histiocytoma	smooth muscle cell	1.22974	1	0.095	0.3838	0	0
112250	Diaphyseal Medullary Stenosis With Malignant Fibrous Histiocytoma	t cell	-0.45285	1	0.813	0.982	0	0
112250	Diaphyseal Medullary Stenosis With Malignant Fibrous Histiocytoma	tendon cell	2.05008	1	0.016	0.304	0	0
113000	Brachydactyly, Type B1	capillary endothelial cell	-0.251582	1	0.735	0.878	0	0
113000	Brachydactyly, Type B1	cd4-positive, alpha-beta t cell	0.107436	1	0.19	0.878	0	0
113000	Brachydactyly, Type B1	cd8-positive, alpha-beta t cell	-0.323623	1	0.684	0.878	0	0
113000	Brachydactyly, Type B1	endothelial cell of artery	-0.323623	1	0.79	0.878	0	0
113000	Brachydactyly, Type B1	endothelial cell of lymphatic vessel	-0.323623	1	0.843	0.878	0	0
113000	Brachydactyly, Type B1	endothelial cell of vascular tree	-0.308001	1	0.754	0.878	0	0
113000	Brachydactyly, Type B1	erythrocyte	-0.323623	1	0.383	0.878	0	0
113000	Brachydactyly, Type B1	fast muscle cell	-0.235028	1	0.565	0.878	0	0
113000	Brachydactyly, Type B1	macrophage	-0.295222	1	0.712	0.878	0	0
113000	Brachydactyly, Type B1	mast cell	-0.323623	1	0.573	0.878	0	0
113000	Brachydactyly, Type B1	mature nk t cell	-0.323623	1	0.712	0.878	0	0
113000	Brachydactyly, Type B1	mesenchymal stem cell	0.192917	1	0.241	0.878	0	0
113000	Brachydactyly, Type B1	mesothelial cell	4.05807	1	0.006	0.114	0	0
113000	Brachydactyly, Type B1	pericyte cell	-0.303071	1	0.878	0.878	0	0
113000	Brachydactyly, Type B1	skeletal muscle satellite stem cell	-0.297514	1	0.787	0.878	0	0
113000	Brachydactyly, Type B1	slow muscle cell	-0.323623	1	0.584	0.878	0	0
113000	Brachydactyly, Type B1	smooth muscle cell	-0.323623	1	0.75	0.878	0	0
113000	Brachydactyly, Type B1	t cell	-0.323623	1	0.755	0.878	0	0
113000	Brachydactyly, Type B1	tendon cell	0.244609	1	0.208	0.878	0	0
114290	Campomelic Dysplasia	capillary endothelial cell	-0.447602	1	0.868	0.93	0	0
114290	Campomelic Dysplasia	cd4-positive, alpha-beta t cell	-0.515407	1	0.8	0.93	0	0
114290	Campomelic Dysplasia	cd8-positive, alpha-beta t cell	-0.515407	1	0.776	0.93	0	0
114290	Campomelic Dysplasia	endothelial cell of artery	-0.466405	1	0.886	0.93	0	0
114290	Campomelic Dysplasia	endothelial cell of lymphatic vessel	-0.515407	1	0.93	0.93	0	0
114290	Campomelic Dysplasia	endothelial cell of vascular tree	-0.411307	1	0.864	0.93	0	0
114290	Campomelic Dysplasia	erythrocyte	-0.515407	1	0.48	0.93	0	0
114290	Campomelic Dysplasia	fast muscle cell	-0.423862	1	0.637	0.93	0	0
114290	Campomelic Dysplasia	macrophage	-0.486509	1	0.826	0.93	0	0
114290	Campomelic Dysplasia	mast cell	-0.515407	1	0.695	0.93	0	0
114290	Campomelic Dysplasia	mature nk t cell	-0.515407	1	0.797	0.93	0	0
114290	Campomelic Dysplasia	mesenchymal stem cell	2.32783	1	0.014	0.19	0	0
114290	Campomelic Dysplasia	mesothelial cell	-0.515407	1	0.765	0.93	0	0
114290	Campomelic Dysplasia	pericyte cell	0.0964084	1	0.315	0.93	0	0
114290	Campomelic Dysplasia	skeletal muscle satellite stem cell	2.30371	1	0.03	0.19	0	0
114290	Campomelic Dysplasia	slow muscle cell	-0.020732	1	0.511	0.93	0	0
114290	Campomelic Dysplasia	smooth muscle cell	-0.351373	1	0.776	0.93	0	0
114290	Campomelic Dysplasia	t cell	-0.515407	1	0.851	0.93	0	0
114290	Campomelic Dysplasia	tendon cell	2.0031	1	0.024	0.19	0	0
PS115150	Cardiofaciocutaneous syndrome	capillary endothelial cell	0.211359	1	0.235	0.496111	0	0
PS115150	Cardiofaciocutaneous syndrome	cd4-positive, alpha-beta t cell	0.658133	1	0.113	0.458714	0	0
PS115150	Cardiofaciocutaneous syndrome	cd8-positive, alpha-beta t cell	0.641767	1	0.114	0.458714	0	0
PS115150	Cardiofaciocutaneous syndrome	endothelial cell of artery	-0.249223	1	0.776	0.967	0	0
PS115150	Cardiofaciocutaneous syndrome	endothelial cell of lymphatic vessel	-0.227204	1	0.762	0.967	0	0
PS115150	Cardiofaciocutaneous syndrome	endothelial cell of vascular tree	0.24829	1	0.211	0.496111	0	0
PS115150	Cardiofaciocutaneous syndrome	erythrocyte	-1.51554	1	0.814	0.967	0	0
PS115150	Cardiofaciocutaneous syndrome	fast muscle cell	-1.42108	1	0.967	0.967	0	0
PS115150	Cardiofaciocutaneous syndrome	macrophage	0.711233	1	0.129	0.458714	0	0
PS115150	Cardiofaciocutaneous syndrome	mast cell	2.15152	1	0.03	0.4085	0	0
PS115150	Cardiofaciocutaneous syndrome	mature nk t cell	0.545421	1	0.166	0.458714	0	0
PS115150	Cardiofaciocutaneous syndrome	mesenchymal stem cell	-0.369011	1	0.835	0.967	0	0
PS115150	Cardiofaciocutaneous syndrome	mesothelial cell	-1.23696	1	0.949	0.967	0	0
PS115150	Cardiofaciocutaneous syndrome	pericyte cell	0.0249571	1	0.347	0.6593	0	0
PS115150	Cardiofaciocutaneous syndrome	skeletal muscle satellite stem cell	0.334642	1	0.169	0.458714	0	0
PS115150	Cardiofaciocutaneous syndrome	slow muscle cell	-1.29389	1	0.955	0.967	0	0
PS115150	Cardiofaciocutaneous syndrome	smooth muscle cell	-0.555692	1	0.883	0.967	0	0
PS115150	Cardiofaciocutaneous syndrome	t cell	1.79423	1	0.043	0.4085	0	0
PS115150	Cardiofaciocutaneous syndrome	tendon cell	-0.452952	1	0.88	0.967	0	0
PS116860	Cerebral cavernous malformations	capillary endothelial cell	0.316369	1	0.208	0.4313	0	1
PS116860	Cerebral cavernous malformations	cd4-positive, alpha-beta t cell	-1.11044	1	0.979	0.979	0	0
PS116860	Cerebral cavernous malformations	cd8-positive, alpha-beta t cell	1.94143	1	0.022	0.418	0	0
PS116860	Cerebral cavernous malformations	endothelial cell of artery	0.193066	1	0.264	0.437	0	0
PS116860	Cerebral cavernous malformations	endothelial cell of lymphatic vessel	0.471018	1	0.204	0.4313	0	0
PS116860	Cerebral cavernous malformations	endothelial cell of vascular tree	0.255012	1	0.183	0.4313	0	0
PS116860	Cerebral cavernous malformations	erythrocyte	-1.41594	1	0.804	0.979	0	0
PS116860	Cerebral cavernous malformations	fast muscle cell	-0.834839	1	0.795	0.979	0	0
PS116860	Cerebral cavernous malformations	macrophage	-0.26302	1	0.669	0.977769	0	0
PS116860	Cerebral cavernous malformations	mast cell	-1.41594	1	0.945	0.979	0	0
PS116860	Cerebral cavernous malformations	mature nk t cell	1.57421	1	0.071	0.4313	0	0
PS116860	Cerebral cavernous malformations	mesenchymal stem cell	0.731993	1	0.092	0.4313	0	0
PS116860	Cerebral cavernous malformations	mesothelial cell	-1.41594	1	0.97	0.979	0	0
PS116860	Cerebral cavernous malformations	pericyte cell	0.374841	1	0.191	0.4313	0	1
PS116860	Cerebral cavernous malformations	skeletal muscle satellite stem cell	0.0335898	1	0.276	0.437	0	0
PS116860	Cerebral cavernous malformations	slow muscle cell	-1.18772	1	0.93	0.979	0	0
PS116860	Cerebral cavernous malformations	smooth muscle cell	0.672834	1	0.15	0.4313	0	0
PS116860	Cerebral cavernous malformations	t cell	0.230593	1	0.227	0.4313	0	0
PS116860	Cerebral cavernous malformations	tendon cell	0.848885	1	0.112	0.4313	0	0
117000	Central Core Disease Of Muscle	capillary endothelial cell	-0.356712	1	0.837	0.883	0	0
117000	Central Core Disease Of Muscle	cd4-positive, alpha-beta t cell	-0.372514	1	0.697	0.883	0	0
117000	Central Core Disease Of Muscle	cd8-positive, alpha-beta t cell	-0.372514	1	0.705	0.883	0	0
117000	Central Core Disease Of Muscle	endothelial cell of artery	-0.372514	1	0.844	0.883	0	0
117000	Central Core Disease Of Muscle	endothelial cell of lymphatic vessel	-0.372514	1	0.848	0.883	0	0
117000	Central Core Disease Of Muscle	endothelial cell of vascular tree	-0.353371	1	0.791	0.883	0	0
117000	Central Core Disease Of Muscle	erythrocyte	0.22589	1	0.013	0.1235	0	0
117000	Central Core Disease Of Muscle	fast muscle cell	3.89227	1	0	0	1	0
117000	Central Core Disease Of Muscle	macrophage	0.013828	1	0.246	0.883	0	0
117000	Central Core Disease Of Muscle	mast cell	-0.372514	1	0.614	0.883	0	0
117000	Central Core Disease Of Muscle	mature nk t cell	-0.372514	1	0.752	0.883	0	0
117000	Central Core Disease Of Muscle	mesenchymal stem cell	-0.354574	1	0.796	0.883	0	0
117000	Central Core Disease Of Muscle	mesothelial cell	-0.372514	1	0.667	0.883	0	0
117000	Central Core Disease Of Muscle	pericyte cell	-0.356708	1	0.883	0.883	0	0
117000	Central Core Disease Of Muscle	skeletal muscle satellite stem cell	-0.124553	1	0.674	0.883	0	0
117000	Central Core Disease Of Muscle	slow muscle cell	0.99407	1	0.096	0.608	0	0
117000	Central Core Disease Of Muscle	smooth muscle cell	-0.372514	1	0.798	0.883	0	0
117000	Central Core Disease Of Muscle	t cell	-0.292625	1	0.73	0.883	0	0
117000	Central Core Disease Of Muscle	tendon cell	-0.307404	1	0.792	0.883	0	0
117300	Dementia, Familial Danish	capillary endothelial cell	1.32674	1	0.073	0.391875	0	0
117300	Dementia, Familial Danish	cd4-positive, alpha-beta t cell	-0.467798	1	0.769	0.991	0	0
117300	Dementia, Familial Danish	cd8-positive, alpha-beta t cell	-0.616414	1	0.828	0.991	0	0
117300	Dementia, Familial Danish	endothelial cell of artery	1.27052	1	0.073	0.391875	0	0
117300	Dementia, Familial Danish	endothelial cell of lymphatic vessel	1.05622	1	0.117	0.391875	0	0
117300	Dementia, Familial Danish	endothelial cell of vascular tree	2.15395	1	0.009	0.171	0	0
117300	Dementia, Familial Danish	erythrocyte	-1.57265	1	0.816	0.991	0	0
117300	Dementia, Familial Danish	fast muscle cell	-1.25643	1	0.949	0.991	0	0
117300	Dementia, Familial Danish	macrophage	0.136648	1	0.2	0.422222	0	0
117300	Dementia, Familial Danish	mast cell	0.183632	1	0.145	0.391875	0	0
117300	Dementia, Familial Danish	mature nk t cell	-0.600952	1	0.839	0.991	0	0
117300	Dementia, Familial Danish	mesenchymal stem cell	0.395887	1	0.165	0.391875	0	0
117300	Dementia, Familial Danish	mesothelial cell	0.393463	1	0.133	0.391875	0	0
117300	Dementia, Familial Danish	pericyte cell	0.203347	1	0.254	0.4826	0	0
117300	Dementia, Familial Danish	skeletal muscle satellite stem cell	-0.855573	1	0.991	0.991	0	0
117300	Dementia, Familial Danish	slow muscle cell	-1.29937	1	0.948	0.991	0	0
117300	Dementia, Familial Danish	smooth muscle cell	-0.221701	1	0.699	0.991	0	0
117300	Dementia, Familial Danish	t cell	-0.806686	1	0.949	0.991	0	0
117300	Dementia, Familial Danish	tendon cell	0.577179	1	0.144	0.391875	0	0
PS117550	Sotos syndrome	capillary endothelial cell	-0.456056	2	0.962	0.984	0	0
PS117550	Sotos syndrome	cd4-positive, alpha-beta t cell	-0.0486194	2	0.438	0.793615	0	0
PS117550	Sotos syndrome	cd8-positive, alpha-beta t cell	-0.243493	2	0.603	0.818357	0	0
PS117550	Sotos syndrome	endothelial cell of artery	0.184523	2	0.339	0.793615	0	0
PS117550	Sotos syndrome	endothelial cell of lymphatic vessel	0.154679	2	0.395	0.793615	0	0
PS117550	Sotos syndrome	endothelial cell of vascular tree	-0.60883	2	0.984	0.984	0	0
PS117550	Sotos syndrome	erythrocyte	-1.00331	2	0.717	0.9082	0	0
PS117550	Sotos syndrome	fast muscle cell	-0.268646	2	0.52	0.793615	0	0
PS117550	Sotos syndrome	macrophage	-0.632726	2	0.966	0.984	0	0
PS117550	Sotos syndrome	mast cell	-0.229484	2	0.495	0.793615	0	0
PS117550	Sotos syndrome	mature nk t cell	0.690148	2	0.167	0.7372	0	0
PS117550	Sotos syndrome	mesenchymal stem cell	0.835685	2	0.068	0.456	0	0
PS117550	Sotos syndrome	mesothelial cell	-0.199473	2	0.543	0.793615	0	0
PS117550	Sotos syndrome	pericyte cell	-0.378118	2	0.962	0.984	0	0
PS117550	Sotos syndrome	skeletal muscle satellite stem cell	0.916159	2	0.055	0.456	0	0
PS117550	Sotos syndrome	slow muscle cell	-0.195021	2	0.497	0.793615	0	0
PS117550	Sotos syndrome	smooth muscle cell	0.212821	2	0.297	0.793615	0	0
PS117550	Sotos syndrome	t cell	0.464917	2	0.194	0.7372	0	0
PS117550	Sotos syndrome	tendon cell	0.804846	2	0.072	0.456	0	0
117650	Cerebrocostomandibular Syndrome	capillary endothelial cell	1.06913	1	0.071	0.405333	0	0
117650	Cerebrocostomandibular Syndrome	cd4-positive, alpha-beta t cell	0.380247	1	0.128	0.405333	0	0
117650	Cerebrocostomandibular Syndrome	cd8-positive, alpha-beta t cell	-0.118481	1	0.594	0.960059	0	0
117650	Cerebrocostomandibular Syndrome	endothelial cell of artery	0.136694	1	0.261	0.619875	0	0
117650	Cerebrocostomandibular Syndrome	endothelial cell of lymphatic vessel	0.031677	1	0.336	0.709333	0	0
117650	Cerebrocostomandibular Syndrome	endothelial cell of vascular tree	1.70461	1	0.025	0.405333	0	0
117650	Cerebrocostomandibular Syndrome	erythrocyte	-2.18246	1	0.961	0.97	0	0
117650	Cerebrocostomandibular Syndrome	fast muscle cell	-0.919015	1	0.859	0.960059	0	0
117650	Cerebrocostomandibular Syndrome	macrophage	-0.496461	1	0.838	0.960059	0	0
117650	Cerebrocostomandibular Syndrome	mast cell	-0.327836	1	0.6	0.960059	0	0
117650	Cerebrocostomandibular Syndrome	mature nk t cell	2.06527	1	0.052	0.405333	0	0
117650	Cerebrocostomandibular Syndrome	mesenchymal stem cell	-0.168384	1	0.696	0.960059	0	0
117650	Cerebrocostomandibular Syndrome	mesothelial cell	-1.33506	1	0.97	0.97	0	0
117650	Cerebrocostomandibular Syndrome	pericyte cell	0.641694	1	0.096	0.405333	0	0
117650	Cerebrocostomandibular Syndrome	skeletal muscle satellite stem cell	0.682583	1	0.12	0.405333	0	0
117650	Cerebrocostomandibular Syndrome	slow muscle cell	-0.786376	1	0.825	0.960059	0	0
117650	Cerebrocostomandibular Syndrome	smooth muscle cell	0.222587	1	0.235	0.619875	0	0
[truncated: 15,829 more rows]

## Sheet: Spleen
Supplementary File 2E. Diseases and their PrEDiCT scores across cell types in spleen.
[truncated: 3,721 more rows]

[truncated: 2 more sheets: Tongue, Trachea]
