# Supplementary material for: Affected cell types for hundreds of Mendelian diseases revealed by analysis of human and mouse single-cell data
Source: eLife. 2024 Jan 10;13:e84613. doi: 10.7554/eLife.84613 (PMC10830129; doi:10.7554/eLife.84613)
Supplement: Supplementary file 3. [file elife-84613-supp3.xlsx]

## Sheet: Supplementary File 3
Supplementary File 3. Names of disease and cell type co-appearance in PubMed records per tissue.
Data per tissue appear in distinct tabs, as follows: 3A Bone marrow, 3B Lung, 3C Skeletal muscle, 3D Spleen, 3E Tongue, and 3F Trachea.

## Sheet: Bone marrow
Supplementary File 3A. Names of disease and cell type co-appearance in PubMed records in bone marrow.
Disease\Phenotypic series accession (OMIM)	Disease\Phenotypic series name	cd4-positive, alpha-beta t cell	cd8-positive, alpha-beta t cell	cd24 neutrophil	erythrocyte	erythroid progenitor	granulocyte	hematopoietic stem cell	macrophage	memory b cell	monocyte	myeloid progenitor	naive b cell	nampt neutrophil	neutrophil	nk cell	plasma cell
249100	Familial Mediterranean Fever, Ar	0	0	0	0	0	0	0	0	0	0	0	0	0	0	0	0
PS276700	Tyrosinemia	0	0	0	0	0	0	0	0	0	0	0	0	0	1	0	0
102700	Severe Combined Immunodeficiency, Autosomal Recessive, T Cell-negative,b Cell-negative, Nk Cell-negative, Due To Adenosine Deaminase Deficiency	0	0	0	0	0	0	0	0	0	0	0	0	0	0	0	0
PS133780	Exudative vitreoretinopathy	0	0	0	0	0	0	0	0	0	0	0	0	0	0	0	0
609628	Majeed Syndrome	0	0	0	0	0	0	0	0	0	0	0	0	0	0	0	0
612423	Prekallikrein Deficiency	0	0	0	0	0	0	0	0	0	0	0	0	0	1	0	0
PS614675	Bone marrow failure syndrome	2	2	0	4	97	45	67	0	1	2	49	1	1	1	7	6
261500	Eosinophil Peroxidase Deficiency	0	0	0	0	0	4	0	0	0	0	0	1	0	2	0	0
141749	Fetal Hemoglobin Quantitative Trait Locus 1	0	0	0	0	2	0	0	0	0	0	0	0	0	0	0	0
PS213200	Spinocerebellar ataxia, autosomal recessive	0	0	0	0	0	0	0	0	0	0	0	0	0	0	0	0
301500	Fabry Disease	1	0	0	1	2	1	2	0	0	0	0	0	0	0	0	0
616959	Retinitis Pigmentosa And Erythrocytic Microcytosis	0	0	0	0	0	0	0	0	0	0	0	0	0	0	0	0
PS177000	Protoporphyria, erythropoietic	0	0	0	6	3	0	0	0	0	0	0	0	0	0	0	0
153670	Bernard-soulier Syndrome, Benign Autosomal Dominant	0	0	0	0	0	0	0	0	0	0	0	0	0	0	0	0
142680	Periodic Fever, Familial, Autosomal Dominant	0	0	0	0	0	0	0	0	0	0	0	0	0	0	0	0
112250	Diaphyseal Medullary Stenosis With Malignant Fibrous Histiocytoma	0	0	0	0	0	0	0	0	0	0	0	0	0	0	0	0
616541	Short Stature, Microcephaly, And Endocrine Dysfunction	0	0	0	0	0	0	0	0	0	0	0	0	0	0	0	0
242900	Immunoosseous Dysplasia, Schimke Type	0	0	0	0	0	0	0	0	0	0	0	0	0	0	0	0
159550	Ataxia-pancytopenia Syndrome	0	0	0	0	0	0	0	0	0	0	0	0	0	0	0	0
202400	Afibrinogenemia, Congenitalhypofibrinogenemia, Congenital, Included	0	0	0	0	0	0	0	0	0	0	0	0	0	0	0	0
PS308230	Immunodeficiency with hyper-IgM	0	0	0	0	0	1	1	0	18	0	0	10	0	0	0	3
271510	Spondyloepimetaphyseal Dysplasia, Sponastrime Type	0	0	0	0	0	0	0	0	0	0	0	0	0	0	0	0
PS145000	Hyperparathyroidism	0	0	0	0	3	0	1	0	0	0	0	0	0	1	0	0
174900	Juvenile Polyposis Syndrome Juvenile Intestinal Polyposis Polyposis, Familial, Of Entire Gastrointestinal Tract Juvenile Polyposis Of Stomach, Included Juvenile Polyposis Coli, Included	0	0	0	0	0	0	0	0	0	0	0	0	0	0	0	0
618660	Hemolytic Anemia Due To Glutathione Reductase Deficiency	0	0	0	4	0	0	0	0	0	0	0	0	0	0	0	0
613977	Cyanosis, Transient Neonatal	0	0	0	0	0	0	0	0	0	0	0	0	0	0	0	0
PS147920	Kabuki syndrome	0	0	0	0	0	0	0	0	2	0	0	1	0	0	0	0
PS214100	Peroxisome biogenesis disorder	0	0	0	0	0	0	0	0	0	0	0	0	0	0	0	0
610377	Mevalonic Aciduria	0	0	0	0	0	0	0	0	0	0	0	0	0	0	0	0
PS256040	Proteosome-associated autoinflammatory syndrome	0	0	0	0	0	0	0	0	0	0	0	0	0	0	0	0
604278	Renal Tubular Acidosis, Proximal, With Ocular Abnormalities And Mentalretardation	0	0	0	0	0	0	0	0	0	0	0	0	0	0	0	0
612690	Spherocytosis, Type 5	0	0	0	1	0	0	0	0	0	0	0	0	0	0	0	0
PS124000	Mitochondrial complex III deficiency, nuclear type	0	0	0	0	0	0	0	0	0	0	0	0	0	0	0	0
251260	Nijmegen Breakage Syndrome	1	1	0	0	0	0	0	0	1	0	0	2	0	0	0	0
300835	Anemia, X-linked, With Or Without Neutropenia And/or Platelet Abnormalities	0	0	0	10	42	24	7	1	4	6	32	1	0	7	2	3
300842	Mcleod Syndrome	0	0	0	1	0	0	0	0	0	0	0	0	0	0	0	0
214800	Charge Syndrome	0	0	0	2	0	0	0	0	0	1	0	0	0	0	0	0
618162	Spondyloepimetaphyseal Dysplasia, Krakow Type	0	0	0	0	0	0	0	0	0	0	0	0	0	0	0	0
PS147060	Hyper-IgE recurrent infection syndrome	0	0	0	0	0	6	0	0	11	1	0	7	0	3	1	2
PS128100	Dystonia	0	0	0	0	0	0	0	0	0	0	0	0	0	0	0	0
PS242860	Immunodeficiency-centromeric instability-facial anomalies	0	0	0	0	0	0	0	0	0	0	0	0	0	0	0	0
611881	Glycogen Storage Disease Xii	0	0	0	0	0	0	0	0	0	0	0	0	0	0	0	0
PS614742	Pulmonary fibrosis and/or bone marrow failure, telomere-related	1	0	0	0	2	3	1	10	0	2	3	0	0	5	0	1
236000	Hodgkin Lymphoma	0	0	0	0	2	5	5	1	8	5	6	10	0	1	6	16
PS617186	Encephalopathy, progressive, early-onset, with brain edema and/or leukoencephalopathy	2	0	0	0	0	0	2	0	1	1	0	3	0	0	0	2
618451	Neurodegeneration, Early-onset, With Choreoathetoid Movements And Microcytic Anemia	0	0	0	0	0	0	0	0	0	0	0	0	0	0	0	0
607625	Niemann-pick Disease, Type C2	0	0	0	0	0	0	0	0	0	0	0	0	0	0	0	0
613978	Hemoglobin H Disease	0	0	0	12	18	0	1	0	0	0	0	0	0	0	0	0
616871	Myeloproliferative/lymphoproliferative Neoplasms, Familial (multiple Types), Susceptibility To	0	0	0	0	0	0	0	0	0	0	0	0	0	0	0	0
616100	Autoimmune Lymphoproliferative Syndrome, Type V	0	0	0	0	0	0	0	0	0	0	0	0	0	0	0	0
193220	Vitreoretinochoroidopathy	0	0	0	0	0	0	0	0	0	0	0	0	0	0	0	0
PS607594	Immunodeficiency, common variable	3	4	0	0	2	3	3	0	233	4	2	104	0	0	4	29
612631	Adenylate Kinase Deficiency, Hemolytic Anemia Due To	0	0	0	0	0	0	0	0	0	0	0	0	0	0	0	0
PS615952	Autoimmune disease, multisystem, infantile-onset	0	0	0	0	0	0	0	0	0	0	0	0	0	0	0	0
602079	Trimethylaminuria	0	0	0	0	0	0	0	0	0	0	0	0	0	0	0	0
614380	Complement Component 4a Deficiency	0	0	0	0	0	0	0	0	0	0	0	0	0	0	0	0
PS300049	Periventricular nodular heterotopia	0	0	0	0	0	0	0	0	0	0	0	0	0	0	0	0
617303	Mucopolysaccharidosis-plus Syndrome	0	0	0	0	0	0	0	0	0	0	0	0	0	0	0	0
614034	Heme Oxygenase-1 Deficiency	0	0	0	0	0	1	1	0	0	0	0	0	0	0	0	0
610798	Immunodeficiency Due To Defect In Mapbp-interacting Protein	0	0	0	0	0	0	0	0	0	0	0	0	0	0	0	0
613179	Immunodeficiency Due To Purine Nucleoside Phosphorylase Deficiency	0	0	0	0	0	0	0	0	0	0	0	0	0	0	0	0
PS242300	Ichthyosis, congenital, autosomal recessive	0	0	0	0	0	1	0	0	1	0	0	0	0	0	0	0
PS203300	Hermansky-Pudlak syndrome	0	0	0	0	0	0	1	0	0	0	0	0	0	0	1	0
615789	Short Stature With Microcephaly And Distinctive Facies	0	0	0	0	0	0	0	0	0	0	0	0	0	0	0	0
608971	Severe Combined Immunodeficiency, Autosomal Recessive, T Cell-negative,b Cell-positive, Nk Cell-positive	0	0	0	0	0	0	0	0	0	0	0	0	0	0	0	0
606054	Propionic Acidemia	0	0	0	0	0	0	0	0	1	0	0	0	0	0	0	0
PS249270	Thiamine-responsive dysfunction syndrome	0	0	0	0	0	0	0	0	0	0	0	0	0	0	0	0
616084	Sideroblastic Anemia With B-cell Immunodeficiency, Periodic Fevers, And Developmental Delay	0	0	0	0	0	0	0	0	0	0	0	0	0	0	0	0
617388	Autoinflammation With Arthritis And Dyskeratosis	0	0	0	0	0	0	0	0	0	0	0	0	0	0	0	0
250790	Methemoglobinemia And Ambiguous Genitalia	0	0	0	0	0	0	0	0	0	0	0	0	0	0	0	0
235700	Hexokinase Deficiency Hemolytic Anemia	0	0	0	0	0	0	0	0	0	0	0	0	0	0	0	0
175050	Juvenile Polyposis/hereditary Hemorrhagic Telangiectasia Syndrome	0	0	0	0	0	0	0	0	0	0	0	0	0	0	0	0
236200	Homocystinuria Due To Cystathionine Beta-synthase Deficiency	0	0	0	0	0	0	0	0	0	0	0	0	0	0	0	0
193400	Von Willebrand Disease	0	0	0	1	2	1	1	0	0	2	2	0	0	0	1	2
PS114580	Familial candidiasis	0	0	0	0	0	4	0	0	3	0	0	0	0	1	1	0
PS163950	Noonan syndrome	0	0	0	0	3	0	2	0	0	0	3	0	0	0	0	0
227500	Factor Vii Deficiency	0	0	0	0	0	1	0	0	1	3	0	0	0	0	0	0
PS605432	Radioulnar synostosis with amegakaryocytic thrombocytopenia	0	0	0	0	0	0	0	0	0	0	0	0	0	0	0	0
PS605552	Abdominal obesity-metabolic syndrome	0	0	0	0	0	0	0	0	0	0	0	0	0	0	0	0
152700	Systemic Lupus Erythematosus	0	0	0	1	2	3	0	1	2	1	0	2	0	7	0	2
243500	Isovaleric Acidemia	0	0	0	0	0	0	0	0	1	0	0	0	0	0	0	0
614470	Ras-associated Autoimmune Lymphoproliferative Syndrome Type Iv, Somatic	0	0	0	0	0	0	0	0	0	0	0	0	0	0	0	0
618806	T-cell Lymphopenia, Infantile, With Or Without Nail Dystrophy, Autosomal Dominant	0	0	0	0	0	0	0	0	0	0	0	0	0	0	0	0
274150	Thrombotic Thrombocytopenic Purpura, Congenital	0	0	0	1	0	3	0	0	4	0	1	2	0	2	0	2
PS313900	Thrombocytopenia	0	0	0	1	7	11	3	1	1	2	8	0	0	3	0	2
222700	Lysinuric Protein Intolerance	0	0	0	0	1	1	0	0	0	0	1	0	0	0	0	0
308300	Incontinentia Pigmenti	0	0	0	0	0	1	0	1	1	0	1	0	0	0	0	1
PS275200	Hypothyroidism, congenital, nongoitrous	0	0	0	0	0	0	0	0	0	0	0	0	0	0	0	0
612300	Hemolytic Anemia, Cd59-mediated, With Or Without Immune-mediated Polyneuropathy	0	0	0	0	0	0	0	0	0	0	0	0	0	0	0	0
280000	Zunich Neuroectodermal Syndrome	0	0	0	0	0	0	0	0	0	0	0	0	0	0	0	0
PS601678	Bartter syndrome	0	0	0	0	0	0	0	0	0	0	0	0	0	0	0	0
306900	Hemophilia B	0	0	0	1	0	0	2	0	2	0	0	0	0	0	0	1
PS177900	Psoriasis	0	0	0	1	0	7	0	2	1	4	0	2	1	10	0	1
170100	Prolidase Deficiency	0	0	0	1	0	0	0	0	1	0	0	0	0	0	0	0
216340	Cleidocranial Dysplasia With Micrognathia, Absent Thumbs, And Distal	0	0	0	0	0	0	0	0	0	0	0	0	0	0	0	0
604928	Wolfram Syndrome 2	0	0	0	0	0	0	0	0	0	0	0	0	0	0	0	0
614038	Lymphedema, Primary, With Myelodysplasia	0	0	0	0	11	0	3	0	0	1	20	2	0	0	4	0
PS300755	Immunodeficiency (Select Examples)	2	1	0	0	1	0	1	0	1	0	0	1	0	0	0	0
PS308240	Lymphoproliferative syndrome	8	6	0	0	5	6	1	0	19	0	5	18	0	1	19	15
PS608583	Atrial fibrillation, familial	0	0	0	0	0	0	0	0	0	0	0	0	0	0	0	0
300990	Midface Hypoplasia, Hearing Impairment, Elliptocytosis, And Nephrocalcinosis	0	0	0	0	0	0	0	0	0	0	0	0	0	0	0	0
306700	Hemophilia A	0	0	0	0	0	1	0	0	5	1	0	3	0	0	0	0
PS212065	Congenital disorders of glycosylation, type I	0	0	0	0	0	1	0	0	0	1	0	0	0	1	1	0
604173	Poikiloderma With Neutropenia	0	0	0	0	0	0	0	0	0	0	1	0	0	0	0	0
PS151623	Li-Fraumeni syndrome	0	0	0	0	0	0	0	0	0	0	0	0	0	0	0	0
609135	Aplastic Anemia	1	1	1	11	71	68	52	0	0	3	34	2	0	1	7	9
613949	Okt4 Epitope Deficiency	0	0	0	0	0	0	0	0	0	0	0	0	0	0	0	0
PS127550	Dyskeratosis congenita	0	0	0	0	4	0	6	0	0	0	5	1	0	0	0	0
300367	Dyserythropoietic Anemia With Thrombocytopeniamacrothrombocytopenia, X-linked, Included	0	0	0	0	0	0	0	0	0	0	0	0	0	0	0	0
603909	Autoimmune Lymphoproliferative Syndrome, Type Iia	0	0	0	0	0	0	0	0	0	0	0	0	0	0	0	0
PS226400	Epidermodysplasia verruciformis, susceptibility to	0	0	0	0	0	0	0	0	1	0	0	1	0	0	1	0
613065	Leukemia, Acute Lymphocytic, Susceptibility To, 1	0	1	0	0	2	0	0	0	1	0	2	1	0	0	3	0
193300	Von Hippel-lindau Syndrome	0	0	0	0	2	0	0	0	0	0	0	0	0	1	1	0
266130	Glutathione Synthetase Deficiency	0	0	0	0	0	1	0	0	0	0	0	0	0	1	0	0
612653	Spherocytosis, Type 4	0	0	0	0	0	0	0	0	0	0	0	0	0	0	0	0
251100	Methylmalonic Aciduria, Cbla Type	0	0	0	0	0	0	0	0	0	0	0	0	0	0	0	0
PS210600	Seckel syndrome	0	0	0	0	0	0	0	0	0	0	0	0	0	0	0	0
PS603075	Macular degeneration, age-related	0	0	0	0	0	0	0	4	0	1	1	0	0	2	0	0
PS252270	Monosomy 7 myelodysplasia and leukemia syndrome	0	0	0	0	2	0	0	0	0	0	4	0	0	0	0	0
616651	Roifman Syndrome	0	0	0	0	0	0	0	0	0	0	0	0	0	0	0	0
230600	Gm1-gangliosidosis, Type Ii	0	0	0	0	0	1	0	0	0	0	0	0	0	0	0	1
601705	T-cell Immunodeficiency, Congenital Alopecia, And Nail Dystrophy	0	0	0	0	0	0	0	0	0	0	0	0	0	0	0	0
PS105650	Diamond-Blackfan anemia	0	0	0	0	110	1	6	0	0	0	5	0	0	0	0	0
133180	Erythroleukemia, Familial, Susceptibility To	0	0	0	0	0	0	0	0	0	0	0	0	0	0	0	0
618278	Fibrosis, Neurodegeneration, And Cerebral Angiomatosis	0	0	0	0	0	0	0	0	0	0	0	0	0	0	0	0
209920	Bare Lymphocyte Syndrome, Type Ii	0	0	0	0	0	0	0	0	0	0	0	0	0	0	0	0
274000	Thrombocytopenia-absent Radius Syndrome	0	0	0	0	0	0	0	0	0	0	0	0	0	0	0	0
309580	Mental Retardation-hypotonic Facies Syndrome, X-linked, 1	0	0	0	0	0	0	0	0	0	0	0	0	0	0	0	0
PS609060	Combined oxidative phosphorylation deficiency	1	1	0	0	2	0	1	0	1	1	3	2	0	0	3	2
618092	Intellectual Developmental Disorder With Speech Delay, Dysmorphic Facies, And T-cell Abnormalities	0	0	0	0	0	0	0	0	0	0	0	1	0	0	0	0
245200	Krabbe Disease	0	0	0	0	1	0	2	1	0	0	0	0	0	0	1	0
238700	Hyperlysinemia	0	0	0	0	0	0	0	0	0	0	0	0	0	0	0	0
618343	Polymicrogyria With Or Without Vascular-type Ehlers-danlos Syndrome	0	0	0	0	0	0	0	0	0	0	0	0	0	0	0	0
PS158350	Cowden disease	0	0	0	0	0	0	0	0	0	0	0	0	0	0	0	0
613329	Plasminogen Activator Inhibitor-1 Deficiency	0	0	0	0	0	0	0	1	0	0	0	0	0	0	0	0
607785	Juvenile Myelomonocytic Leukemia	0	0	0	0	14	3	3	0	0	0	36	0	0	0	0	0
230500	Gm1-gangliosidosis, Type I	0	0	0	0	0	1	0	0	0	0	0	0	0	0	0	1
266140	Pyropoikilocytosis, Hereditary	0	0	0	1	0	0	0	0	0	0	0	0	0	0	0	0
PS251290	Pseudo-TORCH syndrome	0	0	0	0	0	0	0	0	0	1	0	0	0	0	0	0
PS257300	Mosaic variegated aneuploidy syndrome	0	0	0	0	0	0	0	0	0	0	0	0	0	0	0	0
166900	Ovalocytosis, Hereditary Hemolytic	0	0	0	9	0	0	0	0	0	0	0	0	0	0	0	0
613759	Infections, Recurrent, With Encephalopathy, Hepatic Dysfunction, And Cardiovascular Malformations	0	0	0	0	0	0	0	0	0	0	0	0	0	0	0	0
232220	Glycogen Storage Disease Ib	0	0	0	0	0	0	0	0	0	1	1	0	0	3	0	0
PS227650	Fanconi anemia	1	0	0	1	49	3	47	0	1	1	40	1	0	1	2	1
180200	Retinoblastoma	0	0	0	0	4	4	2	0	0	0	3	0	0	0	1	1
601626	Leukemia, Acute Myeloid	0	0	0	0	9	23	25	0	0	15	290	0	1	6	18	2
200100	Abetalipoproteinemia	0	0	0	12	0	0	0	0	0	0	0	0	0	0	0	0
209300	Atransferrinemia	0	0	0	0	0	0	0	0	0	0	0	0	0	0	0	0
116920	Leukocyte Adhesion Deficiency, Type I	0	0	0	0	0	0	1	0	0	0	1	0	0	2	1	0
208900	Ataxia-telangiectasia	4	4	0	0	3	3	10	0	10	0	9	14	0	1	2	0
231900	Glutathione Synthetase Deficiency Of Erythrocytes, Hemolytic Anemiadue To	0	0	0	0	0	0	0	0	0	0	0	0	0	0	0	0
245900	Lecithin:cholesterol Acyltransferase Deficiency	0	0	0	3	0	0	0	0	0	0	0	0	0	0	0	0
613563	Noonan Syndrome-like Disorder With Or Without Juvenile Myelomonocyticleukemia	0	0	0	0	0	0	0	0	0	0	0	0	0	0	0	0
PS224120	Anemia, congenital dyserythropoietic	0	0	0	10	10	2	1	0	0	0	3	0	0	0	0	0
275630	Chanarin-dorfman Syndrome	0	0	0	0	0	0	0	0	0	0	0	0	0	0	0	0
232800	Glycogen Storage Disease Vii	0	0	0	0	0	0	0	0	0	0	0	0	0	0	0	0
612740	Porphyria, Acute Hepatic	0	0	0	0	0	0	0	0	0	0	0	0	0	0	0	0
102900	Adenosine Triphosphate, Elevated, Of Erythrocytes	0	0	0	18	0	0	0	0	0	0	0	0	0	0	0	0
251000	Methylmalonic Aciduria Due To Methylmalonyl-coa Mutase Deficiency	0	0	0	0	0	0	0	0	0	0	0	0	0	0	0	0
615512	Triosephosphate Isomerase Deficiency	0	0	0	0	0	0	0	0	0	0	0	0	0	0	0	0
206200	Iron-refractory Iron Deficiency Anemia	0	0	0	1	0	0	0	0	0	0	0	0	0	0	0	0
618336	Intrauterine Growth Retardation, Metaphyseal Dysplasia, Adrenal Hypoplasia Congenita, Genital Anomalies, And Immunodeficiency	0	0	0	0	0	0	0	0	0	0	0	0	0	0	0	0
617099	Autoinflammation, Panniculitis, And Dermatosis Syndrome	0	0	0	0	0	0	0	0	0	0	0	0	0	0	0	0
PS202700	Neutropenia, severe congenital	0	0	0	0	3	29	4	0	3	0	67	0	4	15	1	0
231000	Gaucher Disease, Type Iii	0	0	0	0	6	0	3	7	1	3	4	1	0	2	0	6
243150	Gastrointestinal Defects And Immunodeficiency Syndrome	0	0	0	0	0	0	0	0	10	0	0	4	0	0	0	3
604290	Aceruloplasminemiahypoceruloplasminemia, Included	0	0	0	0	2	0	1	0	0	1	0	0	0	2	2	0
301015	Hemolytic Anemia, Congenital, X-linked	0	0	0	0	2	1	1	0	0	0	1	0	0	0	0	0
300322	Lesch-nyhan Syndrome	0	0	0	2	0	0	0	0	0	0	1	0	0	0	0	0
PS260400	Schwachman-Diamond syndrome	0	0	1	0	2	4	3	0	0	0	11	0	0	3	0	0
181000	Sarcoidosis, Susceptibility To, 1	1	0	0	0	0	0	0	0	0	2	0	0	0	0	0	0
PS187950	Thrombocythemia	0	0	0	0	99	23	14	1	0	2	76	0	0	6	1	8
270970	Spherocytosis, Autosomal Recessive	0	0	0	0	0	0	0	0	0	0	0	0	0	0	0	0
PS153100	Lymphatic malformation	5	3	0	0	0	0	1	1	8	0	4	4	0	0	1	7
616914	Marfan Lipodystrophy Syndrome	0	0	0	0	0	0	0	0	0	0	0	0	0	0	0	0
300908	Anemia, Nonspherocytic Hemolytic, Due To G6pd Deficiency	0	0	0	0	0	0	0	0	0	0	0	0	0	0	0	0
612416	Factor Xi Deficiency	0	0	0	0	1	0	1	1	1	0	1	1	0	1	0	0
214500	Chediak-higashi Syndrome	0	0	0	1	1	18	1	0	0	2	1	0	0	19	8	3
250250	Cartilage-hair Hypoplasia	0	1	0	0	1	0	0	0	0	0	1	0	0	0	1	1
617780	Combined Immunodeficiency And Megaloblastic Anemia With Or Without Hyperhomocysteinemia	0	0	0	0	0	0	0	0	0	0	0	0	0	0	0	0
604131	Alpha-thalassemia	0	0	0	20	59	0	2	0	0	0	2	1	0	0	0	0
PS619115	Combined osteogenesis imperfecta and Ehlers-Danlos syndrome	0	0	0	0	0	0	0	0	0	0	0	0	0	0	0	0
608957	Cd8 Deficiency, Familial	0	0	0	0	0	0	0	0	0	0	0	0	0	0	0	0
616638	Smith-kingsmore Syndrome	0	0	0	0	0	0	0	0	0	0	0	0	0	0	0	0
615486	Interstitial Lung And Liver Disease	0	0	0	0	0	0	0	2	0	0	0	0	0	0	0	2
PS221900	Persistent hyperplastic primary vitreous	0	0	0	0	0	0	0	0	0	0	0	0	0	0	0	0
PS184255	Spondylometaphyseal dysplasia	0	0	0	0	0	0	0	0	0	0	0	0	0	0	0	0
271400	Asplenia, Isolated Congenital	0	0	0	0	0	0	0	0	0	0	0	0	0	0	0	0
608068	Neutrophilic Dermatosis, Acute Febrile	0	0	0	0	0	5	0	0	0	0	2	0	0	129	1	0
601457	Severe Combined Immunodeficiency, Autosomal Recessive, T Cell-negative,b Cell-negative, Nk Cell-positive	0	0	0	0	0	0	0	0	0	0	0	0	0	0	0	0
300653	Phosphoglycerate Kinase 1 Deficiency	0	0	0	0	0	0	0	0	0	0	0	0	0	0	0	0
605309	Macrocephaly/autism Syndrome	0	0	0	0	0	0	0	0	0	0	0	0	0	0	0	0
257200	Niemann-pick Disease, Type A	0	0	0	0	0	0	0	0	0	0	0	0	0	0	0	0
228960	Flaujeac Factor Deficiency	0	0	0	0	0	0	0	0	0	0	0	0	0	0	0	0
PS231200	Bleeding disorder, platelet-type	0	0	0	0	0	0	0	0	0	0	0	0	0	0	0	0
611773	Angiopathy, Hereditary, With Nephropathy, Aneurysms, And Muscle Cramps	0	0	0	0	0	0	0	0	0	0	0	0	0	0	0	0
614286	Myelodysplastic Syndrome	1	2	1	2	122	56	45	0	0	4	206	3	0	15	11	6
230900	Gaucher Disease, Type Ii	0	0	0	0	6	0	3	7	1	3	4	1	0	2	0	6
147750	Ivic Syndrome	0	0	0	0	0	0	0	0	0	0	0	0	0	0	0	0
277900	Wilson Disease	0	0	0	1	0	0	0	3	0	1	0	0	0	1	1	1
PS308350	Developmental and epileptic encephalopathy	0	0	0	0	0	0	0	0	0	0	0	0	0	0	0	0
PS600462	Myopathy, lactic acidosis, and sideroblastic anemia	0	0	0	0	0	0	0	0	0	0	0	0	0	0	0	0
208400	Aspartylglucosaminuria	0	0	0	0	0	0	0	0	0	0	0	0	0	0	0	0
304790	Immunodysregulation, Polyendocrinopathy, And Enteropathy, X-linked	0	0	0	0	0	0	0	0	0	0	0	0	0	0	0	0
PS178600	Pulmonary hypertension, primary	0	0	0	2	2	0	0	0	2	0	4	1	0	0	0	2
PS187300	Telangiectasia, hereditary hemorrhagic	0	0	0	0	0	0	0	0	0	1	1	0	0	0	0	0
PS212066	Congenital disorders of glycosylation, type II	0	0	0	0	0	0	0	0	0	0	0	0	0	0	0	0
PS607634	Osteopetrosis, autosomal dominant	0	0	0	0	0	0	0	0	0	0	0	0	0	0	0	0
607626	Ichthyosis, Leukocyte Vacuoles, Alopecia, And Sclerosing Cholangitis	0	0	0	0	0	0	0	0	0	0	0	0	0	0	0	0
PS245480	Specific granule deficiency	0	0	0	0	1	8	0	0	0	0	2	0	0	12	0	0
614857	Methylmalonic Aciduria And Homocystinuria, Cblj Type	0	0	0	0	0	0	0	0	0	0	0	0	0	0	0	0
131300	Camurati-engelmann Disease	0	0	0	0	0	0	0	0	0	0	0	0	0	0	0	0
242840	Immunodeficiency With Cleft Lip/palate, Cataract, Hypopigmentation,and Absent Corpus Callosum	0	0	0	0	0	0	0	0	0	0	0	0	0	0	0	0
613554	Von Willebrand Disease, Type 2	0	0	0	0	0	0	0	0	0	0	0	0	0	0	0	0
260920	Hyper-igd Syndrome	0	0	0	0	0	0	0	0	4	0	0	2	0	0	0	0
230000	Fucosidosis	0	0	0	0	0	0	0	0	0	0	0	0	0	0	0	0
613112	Macrothrombocytopenia, Autosomal Dominant, Tubb1-related	0	0	0	0	0	0	0	0	0	0	0	0	0	0	0	0
PS189800	Preeclampsia/eclampsia	0	0	0	0	0	0	0	0	0	0	0	0	0	0	0	0
602782	Histiocytosis-lymphadenopathy Plus Syndrome	0	0	0	0	0	0	0	0	0	0	0	0	0	0	0	0
618398	T-cell Lymphoma, Subcutaneous Panniculitis-like	2	1	0	0	0	0	0	0	1	0	0	0	0	0	4	0
606593	Lig4 Syndrome	0	0	0	0	0	0	0	0	0	0	0	0	0	0	0	0
217000	Complement Component 2 Deficiency	0	0	0	0	0	3	0	2	0	1	0	0	0	1	0	0
613070	Liver Failure, Acute Infantile	0	0	0	0	0	0	0	0	0	0	0	0	0	0	0	0
616452	B-cell Expansion With Nfkb And T-cell Anergy	0	0	0	0	0	0	0	0	0	0	0	0	0	0	0	0
277480	Von Willebrand Disease, Recessive Form	0	0	0	0	2	1	1	1	0	2	2	0	0	0	1	3
PS210250	Sitosterolemia	0	0	0	0	0	0	0	0	0	0	0	0	0	0	0	0
230650	Gm1-gangliosidosis, Type Iii	0	0	0	0	0	1	0	0	0	0	0	0	0	0	0	1
618805	Triokinase And Fmn Cyclase Deficiency Syndrome	0	0	0	0	0	0	0	0	0	0	0	0	0	0	0	0
PS613658	Rajab interstitial lung disease with brain calcifications	0	0	0	0	0	0	0	0	0	0	0	0	0	0	0	0
601399	Platelet Disorder, Familial, With Associated Myeloid Malignancy	0	0	0	0	0	0	0	0	0	0	2	0	0	0	0	0
609069	Pancreatic And Cerebellar Agenesis	0	0	0	0	0	0	0	0	0	0	0	0	0	0	0	0
618892	Harderoporphyria	0	0	0	0	0	0	0	0	0	0	0	0	0	0	0	0
612840	Leukocyte Adhesion Deficiency, Type Iii	0	0	0	0	0	0	0	0	0	0	0	0	0	0	1	0
618999	Autoinflammation, Immune Dysregulation, And Eosinophilia	0	0	0	0	0	0	0	0	0	0	0	0	0	0	0	0
608013	Gaucher Disease, Perinatal Lethal	0	0	0	0	0	0	0	0	0	0	0	0	0	0	0	0
267500	Reticular Dysgenesia	0	0	0	0	0	1	1	0	0	0	0	1	0	0	0	0
PS609192	Loeys-Dietz syndrome	0	0	0	0	0	0	0	0	0	0	0	0	0	0	0	0
PS256300	Nephrotic syndrome	0	0	0	3	0	0	0	0	5	2	0	1	0	0	2	6
236270	Homocystinuria-megaloblastic Anemia Due To Defect In Cobalamin Metabolism,cble Complementation Type	0	0	0	0	0	0	0	0	0	0	0	0	0	0	0	0
615934	Sting-associated Vasculopathy, Infantile-onset	0	0	0	0	0	0	0	0	0	0	0	0	0	0	0	0
619004	Deeah Syndrome	0	0	0	3	0	0	0	0	0	0	0	0	0	6	0	0
191900	Muckle-wells Syndrome	0	0	0	0	0	0	0	0	1	1	1	0	0	1	0	0
PS300818	Paroxysmal nocturnal hemoglobinuria	2	5	18	37	31	34	22	0	1	6	10	4	0	3	4	1
618213	Inflammatory Bowel Disease, Immunodeficiency, And Encephalopathy	0	0	0	0	0	0	0	0	0	0	0	0	0	0	1	0
277380	Methylmalonic Aciduria And Homocystinuria, Cblf Type	0	0	0	0	0	0	0	0	0	0	0	0	0	0	0	0
130600	Elliptocytosis 2	0	0	0	9	1	0	0	0	0	0	0	0	0	0	0	0
PS120100	Familial cold autoinflammatory syndrome	0	0	0	0	0	0	0	0	1	1	1	0	0	1	0	0
PS211600	Cholestasis, progressive familial intrahepatic	0	0	0	0	0	0	0	0	0	0	0	0	0	0	0	0
618795	Juvenile Arthritis	2	2	0	0	1	4	1	1	5	2	0	3	0	2	6	5
615688	Vasculitis, Autoinflammation, Immunodeficiency, And Hematologic Defects Syndrome	0	0	0	0	0	0	0	0	4	0	0	0	0	0	0	0
248500	Mannosidosis, Alpha B, Lysosomal	0	0	0	0	0	0	0	0	0	0	0	0	0	0	0	0
613235	Factor Xiii, B Subunit, Deficiency Of	0	0	0	0	0	0	0	0	0	0	0	0	0	0	0	0
226600	Epidermolysis Bullosa Dystrophica, Autosomal Recessive	0	0	0	0	0	0	0	0	0	0	0	0	0	0	0	0
175200	Peutz-jeghers Syndrome	0	0	0	0	0	0	0	0	0	0	0	0	0	0	0	0
PS218330	Cranioectodermal dysplasia	0	0	0	0	0	0	0	0	0	0	0	0	0	0	0	0
PS188050	Thrombophilia	0	0	0	2	1	2	0	0	0	10	1	0	0	2	1	0
PS230400	Galactosemia	0	0	0	5	0	1	0	0	0	0	0	0	0	1	0	0
301040	Alpha-thalassemia/mental Retardation Syndrome, Nondeletion Type, X-linked	0	0	0	0	0	0	0	0	0	0	0	0	0	0	0	0
150550	Periodic Fever, Immunodeficiency, And Thrombocytopenia Syndrome	0	0	0	0	0	0	0	0	0	0	0	0	0	0	0	0
PS166200	Osteogenesis imperfecta	0	0	0	0	0	0	1	0	0	0	1	0	0	0	0	2
254600	Myeloperoxidase Deficiency	0	0	0	0	0	14	0	0	0	4	1	0	0	20	0	0
262850	Plasmin Inhibitor Deficiency	0	0	0	0	0	0	0	0	0	0	0	0	0	0	0	0
PS206100	Anemia, hypochromic microcytic, with iron overload	0	0	0	0	0	0	0	0	0	0	0	0	0	0	0	0
154800	Mast Cell Disease	1	3	0	0	5	12	2	22	3	6	24	5	0	1	11	17
269920	Infantile Sialic Acid Storage Disorder	0	0	0	1	0	0	0	0	0	0	0	0	0	0	0	0
PS277450	Vitamin K-dependent clotting factors, combined deficiency of	0	0	0	0	0	0	0	0	0	0	0	0	0	0	0	0
PS606777	Glut1 deficiency syndrome	0	0	0	0	0	0	0	0	0	0	0	0	0	0	0	0
PS606176	Diabetes mellitus, permanent neonatal	0	0	0	0	0	0	0	0	0	0	0	0	0	0	0	0
617021	Hydrops, Lactic Acidosis, And Sideroblastic Anemia	0	0	0	0	0	0	0	0	0	0	0	0	0	0	0	0
607616	Niemann-pick Disease, Type B	0	0	0	0	0	0	0	0	0	0	0	0	0	0	0	0
PS610489	Pigmented nodular adrenocortical disease, primary	0	0	0	0	0	0	0	0	0	0	0	0	0	0	0	0
PS214450	Griscelli syndrome	0	0	0	0	0	2	0	0	1	1	1	0	0	0	3	1
177850	Pseudoxanthoma Elasticum, Forme Frustepseudoxanthoma Elasticum, Heterozygous, Included	0	0	0	0	0	0	0	0	0	0	0	0	0	0	0	0
607236	Hypoprebetalipoproteinemia, Acanthocytosis, Retinitis Pigmentosa,and Pallidal Degeneration	0	0	0	0	0	0	0	0	0	0	0	0	0	0	0	0
601859	Autoimmune Lymphoproliferative Syndrome	4	3	0	0	1	1	1	0	9	0	0	7	0	1	0	4
200150	Choreoacanthocytosis	0	0	0	2	0	0	0	0	0	0	0	0	0	0	0	0
162800	Cyclic Hematopoiesis	0	0	0	1	5	15	4	0	0	0	10	0	0	6	0	0
PS253600	Muscular dystrophy, limb-girdle, autosomal recessive	0	0	0	0	0	0	0	0	0	0	0	0	0	0	0	0
600195	Venous Malformations, Multiple Cutaneous And Mucosal	0	0	0	0	0	0	0	0	0	0	0	0	0	0	0	0
PS235200	Hemochromatosis	1	1	0	1	6	0	0	0	0	2	1	0	0	0	0	2
PS259700	Osteopetrosis, autosomal recessive	0	0	0	0	1	0	0	0	0	0	1	0	0	0	0	0
618852	Autoinflammation With Episodic Fever And Lymphadenopathy	0	0	0	0	0	0	0	0	0	0	0	0	0	0	0	0
PS220110	Mitochondrial complex IV deficiency, nuclear-type	0	0	0	0	0	0	0	0	0	0	0	0	0	0	0	0
607271	Autoimmune Lymphoproliferative Syndrome, Type Iib	4	3	0	0	1	1	1	0	9	0	0	7	0	1	0	4
251900	Mitochondrial Myopathy, Episodic, With Optic Atrophy And Reversible Leukoencephalopathy	0	0	0	0	0	0	0	0	0	0	0	0	0	0	0	0
614868	T-cell Immunodeficiency, Recurrent Infections, And Autoimmunity Withor Without Cardiac Malformations	0	0	0	0	0	0	0	0	0	0	0	0	0	0	0	0
275350	Transcobalamin Ii Deficiency	0	0	0	0	0	3	0	0	0	0	0	0	0	0	0	0
604498	Amegakaryocytic Thrombocytopenia, Congenital	0	0	0	0	2	1	2	0	0	0	1	0	0	0	0	0
617441	Thrombocytopenia, Anemia, And Myelofibrosis	0	0	0	0	4	1	1	0	0	0	3	0	0	0	0	0
185020	Cryohydrocytosis	0	0	0	0	0	0	0	0	0	0	0	0	0	0	0	0
278000	Lysosomal Acid Lipase Deficiency	0	0	0	0	0	0	0	0	0	0	1	0	0	0	0	0
607847	Neutropenia, Nonimmune Chronic Idiopathic, Of Adults	0	0	0	0	0	0	0	0	0	0	0	0	0	0	0	0
PS601495	Agammaglobulinemia	0	0	0	0	3	5	2	1	79	3	6	93	0	6	3	64
314050	Thrombocytopenia With Beta-thalassemia, X-linked	0	0	0	0	0	0	0	0	0	0	0	0	0	0	0	0
167800	Pancreatitis, Hereditary	0	0	0	0	0	0	0	0	0	0	0	0	0	0	0	0
180000	Retinal Arteries, Tortuosity Of	0	0	0	0	0	0	0	0	0	0	0	0	0	0	0	0
256700	Neuroblastoma	0	0	0	0	0	0	5	0	0	2	3	0	0	1	4	1
185070	Stormorken Syndrome	0	0	0	0	0	0	0	0	0	0	0	0	0	0	0	0
617425	Immunoskeletal Dysplasia With Neurodevelopmental Abnormalities	0	0	0	0	0	0	0	0	0	0	0	0	0	0	0	0
614979	Splenomegaly, Cytopenia, And Vision Loss	0	0	0	0	0	0	0	0	0	0	0	0	0	0	0	0
PS235400	Hemolytic uremic syndrome	0	0	0	7	0	3	0	0	0	2	0	0	0	3	0	0
231095	Ghosal Hematodiaphyseal Dysplasia	0	0	0	0	0	0	0	0	0	0	0	0	0	0	0	0
603554	Omenn Syndrome	20	15	0	1	19	7	103	3	43	7	56	69	0	2	44	17
606003	Transaldolase Deficiency	0	0	0	0	0	0	0	0	0	0	0	0	0	0	0	0
PS266900	Senior-Loken syndrome	0	0	0	0	0	0	0	0	0	0	0	0	0	0	0	0
269600	Sea-blue Histiocyte Disease	0	0	0	0	0	0	0	0	0	0	0	0	0	0	0	0
615558	Hypobetalipoproteinemia, Familial, 1	0	0	0	0	0	0	0	0	0	0	0	0	0	0	0	0
266200	Pyruvate Kinase Deficiency Of Red Cells	0	0	0	0	0	0	0	0	0	0	0	0	0	0	0	0
266120	Uridine 5-prime Monophosphate Hydrolase Deficiency, Hemolytic Anemiadue To	0	0	0	0	0	0	0	0	0	0	0	0	0	0	0	0
241500	Hypophosphatasia, Infantile	0	0	0	0	0	0	0	0	0	0	0	0	0	0	0	0
PS130000	Ehlers-Danlos syndrome	0	0	0	0	0	0	0	0	0	0	0	0	0	0	0	1
253270	Holocarboxylase Synthetase Deficiency	0	0	0	0	0	0	0	0	0	0	0	0	0	0	0	0
PS179800	Distal renal tubular acidosis	0	0	0	2	0	0	0	0	0	0	0	0	0	0	0	1
222800	Diphosphoglycerate Mutase Deficiency Of Erythrocyte	0	0	0	0	0	0	0	0	0	0	0	0	0	0	0	0
PS607426	Coenzyme Q10 deficiency, primary	0	0	0	0	0	0	0	0	0	0	0	0	0	0	0	0
613985	Beta-thalassemia	0	0	0	32	128	1	10	0	2	2	5	2	0	3	1	0
PS615438	Infantile liver failure syndrome	0	0	0	0	0	0	0	0	0	0	0	0	0	0	0	0
301310	Anemia, Sideroblastic, And Spinocerebellar Ataxia	0	0	0	0	0	0	0	0	0	0	0	0	0	0	0	0
PS276300	Mismatch repair cancer syndrome	0	0	0	0	1	0	0	0	0	0	0	0	0	0	0	0
610842	Pseudoxanthoma Elasticum-like Disorder With Multiple Coagulation Factor Deficiency	0	0	0	0	0	0	0	0	0	0	0	0	0	0	0	0
613470	Hemolytic Anemia, Nonspherocytic, Due To Glucose Phosphate Isomerase	0	0	0	5	0	2	0	0	0	0	0	0	0	0	0	0
PS266600	Inflammatory bowel disease	1	0	0	0	2	8	0	6	3	1	0	2	0	3	0	1
229600	Fructose Intolerance, Hereditary	0	0	0	0	0	0	0	0	0	0	0	0	0	0	0	0
PS210900	Microcephaly, growth restriction and increased sister chromatid exchange	0	0	0	0	0	0	0	0	0	0	0	0	0	0	0	0
PS603278	Focal segmental glomerulosclerosis	0	0	0	0	0	0	0	2	2	3	0	0	0	0	0	2
PS214700	Diarrhea, congenital	1	0	0	0	0	1	0	0	0	0	0	1	0	0	1	0
193670	Whim Syndrome	0	0	0	0	0	1	2	0	3	0	1	1	0	0	2	2
216550	Cohen Syndrome	0	0	0	0	0	0	0	0	0	0	0	0	0	1	0	0
613845	Hyperuricemia, Pulmonary Hypertension, Renal Failure, And Alkalosis	0	0	0	0	0	0	0	0	0	0	0	0	0	0	0	0
PS222470	Trichohepatoenteric syndrome	0	0	0	0	0	0	0	0	1	0	0	0	0	0	0	0
312700	Retinoschisis 1, X-linked, Juvenile	0	0	0	0	0	0	0	0	0	0	0	0	0	0	0	0
PS225750	Aicardi-Goutieres syndrome	0	0	0	0	0	0	0	0	0	1	0	0	0	0	0	0
263700	Porphyria, Congenital Erythropoietic	0	0	0	3	2	0	0	0	0	0	0	0	0	0	0	0
251110	Methylmalonic Aciduria, Cblb Type	0	0	0	0	0	0	0	0	0	0	0	0	0	0	0	0
616050	Autoinflammation With Infantile Enterocolitis	0	0	0	0	0	0	0	0	0	0	0	0	0	0	0	0
226300	Complement Hyperactivation, Angiopathic Thrombosis, And Protein-losing Enteropathy	0	0	0	0	0	0	0	0	0	0	0	0	0	0	0	0
261000	Intrinsic Factor Deficiency	0	0	0	0	0	0	0	0	0	0	0	0	0	0	0	0
PS613280	Hypermanganesemia with dystonia	0	0	0	0	0	0	0	0	0	0	0	0	0	0	0	0
PS267700	Hemophagocytic lymphohistiocytosis, familial	0	2	0	0	3	1	1	1	6	5	3	4	0	0	40	4
268150	Anemia, Hemolytic, Rh-null, Regulator Type	0	0	0	0	0	0	0	0	0	0	0	0	0	0	0	0
140700	Heinz Body Anemias	0	0	0	0	0	0	0	0	0	0	0	0	0	0	0	0
616649	Spherocytosis, Type 2	0	0	0	2	0	0	0	0	0	0	0	0	0	0	0	0
610539	Gaucher Disease, Atypical	0	0	0	0	0	0	0	0	0	0	0	0	0	0	0	0
PS133100	Erythrocytosis, familial	0	0	0	2	51	4	1	0	0	0	9	0	0	0	0	0
615559	Autoimmune Lymphoproliferative Syndrome, Type Iii	0	0	0	0	0	0	0	0	0	0	0	0	0	0	0	0
PS162000	Tubulointerstitial kidney disease	0	0	0	0	2	0	0	7	2	2	0	1	0	4	3	40
PS124900	Deafness, autosomal dominant	0	0	0	0	0	1	0	0	0	0	0	0	0	0	0	0
PS301050	Alport syndrome	0	0	0	1	1	3	1	1	0	1	0	0	0	1	0	0
612714	Exocrine Pancreatic Insufficiency, Dyserythropoietic Anemia, And Calvarial	0	0	0	0	0	0	0	0	0	0	0	0	0	0	0	0
603903	Sickle Cell Anemia	0	0	0	24	15	2	8	0	1	2	0	0	0	3	1	2
300853	Immunodeficiency, X-linked, With Magnesium Defect, Epstein-barr Virus Infection And Neoplasia	0	0	0	0	0	0	0	0	1	0	0	1	0	0	0	0
256500	Netherton Syndrome	0	0	0	0	0	0	0	0	3	0	0	1	0	0	0	0
233650	Combined Cellular And Humoral Immune Defects With Granulomas	0	0	0	0	0	0	0	0	0	0	0	1	0	0	0	0
210370	Bietti Crystalline Corneoretinal Dystrophy	0	0	0	0	0	0	0	0	0	0	0	0	0	0	0	0
613679	Congenital Prothrombin Deficiency	0	0	0	0	0	0	0	0	0	0	0	0	0	0	0	0
PS610460	Thiopurines, poor metabolism of	0	0	0	0	0	0	0	0	0	0	0	0	0	0	0	0
PS612199	Cerebroretinal microangiopathy with calcfications and cysts	0	0	0	0	0	0	0	0	0	0	0	0	0	0	0	0
230450	Gamma-glutamylcysteine Synthetase Deficiency, Hemolytic Anemia Dueto	0	0	0	0	0	0	0	0	0	0	0	0	0	0	0	0
PS175780	Brain small vessel disease	0	0	0	1	0	1	0	1	0	1	0	0	0	0	0	1
PS256730	Ceroid lipofuscinoses	0	0	0	0	0	0	0	0	0	0	0	0	0	0	0	0
229050	Folic Acid, Transport Defect Involving	0	0	0	0	0	0	0	0	0	0	0	0	0	0	0	0
226670	Epidermolysis Bullosa Simplex With Muscular Dystrophy	0	0	0	0	0	0	0	0	0	0	0	0	0	0	0	0
PS127000	Kenny-Caffey syndrome	0	0	0	0	0	0	0	0	0	0	0	0	0	0	0	0
PS607765	Bile acid synthesis defect, congenital	0	0	0	0	0	0	0	0	0	0	0	0	0	0	0	0
617948	Elliptocytosis-3	0	0	0	0	0	0	0	0	0	0	0	0	0	0	0	0
300048	Intestinal Pseudoobstruction, Neuronal, Chronic Idiopathic, X-linked	0	0	0	0	0	0	0	0	0	0	0	0	0	0	0	0
604416	Pyogenic Sterile Arthritis, Pyoderma Gangrenosum, And Acne	0	0	0	0	0	0	0	0	0	0	0	0	0	2	0	0
607330	Lathosterolosis	0	0	0	0	0	0	0	0	0	0	0	0	0	0	0	0
169400	Pelger-huet Anomaly	0	0	0	0	1	14	0	0	0	0	3	0	0	10	0	0
PS250950	3-Methylglutaconic aciduria	0	0	0	0	0	0	0	0	0	0	0	0	0	0	0	0
234000	Factor Xii Deficiency	0	0	0	0	0	0	0	0	0	1	0	0	0	1	0	0
PS300751	Anemia, Sideroblastic	0	0	0	7	31	6	2	1	0	0	11	0	0	1	0	2
614493	Wiskott-aldrich Syndrome 2	0	1	0	0	1	2	2	0	3	0	3	6	0	2	5	2
608885	Stomatin-deficient Cryohydrocytosis With Neurologic Defects	0	0	0	0	0	0	0	0	0	0	0	0	0	0	0	0
613839	Megaloblastic Anemia Due To Dihydrofolate Reductase Deficiency	0	0	0	0	0	0	0	0	0	0	0	0	0	0	0	0
185000	Overhydrated Hereditary Stomatocytosis	0	0	0	2	1	0	0	0	0	0	0	0	0	0	0	0
277400	Methylmalonic Aciduria And Homocystinuria, Cblc Type	0	0	0	0	0	0	0	0	0	0	0	0	0	0	0	0
257220	Niemann-pick Disease, Type C1	0	0	0	0	0	0	0	0	0	1	0	0	0	0	0	0
182900	Spherocytosis, Hereditary	0	0	0	79	9	1	1	0	1	0	2	0	0	2	1	0
616737	Takenouchi-kosaki Syndrome	0	0	0	0	0	0	0	0	1	0	0	1	0	0	0	0
616577	Epilepsy, Hearing Loss, And Mental Retardation Syndrome	0	0	0	0	0	0	0	0	0	0	0	0	0	0	0	0
194380	Dehydrated Hereditary Stomatocytosis With Or Without Pseudohyperkalemiaand/or Perinatal Edema	0	0	0	1	0	0	0	0	0	0	0	0	0	0	0	0
605027	Lymphoma, Non-hodgkin, Familial	0	0	0	0	2	1	0	0	1	1	4	4	0	0	6	13
258900	Orotic Aciduria	0	0	0	0	0	0	0	0	0	0	0	0	0	0	0	0
600802	Scid, Autosomal Recessive, T-negative/b-positive Type	0	0	0	0	0	0	0	0	0	0	0	0	0	0	0	0
PS261100	Imerslund-Grasbeck syndrome	0	0	0	0	0	0	0	0	0	0	0	0	0	0	0	0
246450	3-hydroxy-3-methylglutaryl-coa Lyase Deficiency	0	0	0	0	0	0	0	0	0	0	0	0	0	0	0	0
231005	Gaucher Disease, Type Iiic	0	0	0	0	0	0	0	0	0	0	0	0	0	0	0	0
PS306400	Granulomatous disease, chronic	6	2	0	0	1	100	8	13	17	25	11	7	0	112	5	9
610293	Glycosylphosphatidylinositol Deficiency	0	0	0	0	0	0	0	0	0	0	0	0	0	0	1	0
611174	Hamamy Syndrome	0	0	0	0	0	0	0	0	0	0	0	0	0	0	0	0
229100	Formiminotransferase Deficiency	0	0	0	0	0	0	0	0	0	0	0	0	0	0	0	0
617053	Mirage Syndrome	0	0	0	0	0	0	0	0	0	0	0	0	0	0	0	0
208050	Arterial Tortuosity Syndrome	0	0	0	0	0	0	0	0	0	0	0	0	0	0	0	0
230800	Gaucher Disease, Type I	0	0	0	0	6	0	3	7	1	3	4	1	0	2	0	6
228000	Farber Lipogranulomatosis	0	0	0	0	0	0	0	0	0	0	0	0	0	0	0	0
277410	Methylmalonic Aciduria And Homocystinuria, Cbld Type	0	0	0	0	0	0	0	0	0	0	0	0	0	0	0	0
610582	Diabetes Mellitus, Transient Neonatal, 3	0	0	0	0	0	0	0	0	0	0	0	0	0	0	0	0
PS256100	Nephronophthisis	0	0	0	0	0	0	0	0	0	0	0	0	0	0	0	0
610090	Pyridoxamine 5-prime-phosphate Oxidase Deficiency	0	0	0	0	0	0	0	0	0	0	0	0	0	0	0	0
250800	Methemoglobinemia Due To Deficiency Of Methemoglobin Reductase	0	0	0	0	0	0	0	0	0	0	0	0	0	0	0	0
616689	Dehydrated Hereditary Stomatocytosis 2	0	0	0	0	1	0	0	0	0	0	0	0	0	0	0	0
611804	Elliptocytosis 1	0	0	0	17	2	0	0	0	0	0	0	0	0	0	0	0
618372	Gastrointestinal Ulceration, Recurrent, With Dysfunctional Platelets	0	0	0	0	0	0	0	0	0	0	0	0	0	0	0	0
609529	Immunoglobulin A Deficiency 2	1	1	0	0	0	1	0	0	26	0	0	15	0	1	0	11
PS603041	Mitochondrial DNA depletion syndrome	0	0	0	0	0	0	0	0	0	0	0	0	0	0	0	0
256550	Neuraminidase Deficiency	1	1	0	1	1	0	0	0	0	0	0	0	0	1	1	2
617911	Diamond-blackfan Anemia-like	0	0	0	0	0	0	0	0	0	0	0	0	0	0	0	0
617241	Lung Disease, Immunodeficiency, And Chromosome Breakage Syndrome	0	0	0	0	0	0	0	0	0	0	0	0	0	0	0	0
232200	Glycogen Storage Disease Ia	0	0	0	0	0	0	0	0	0	0	1	0	0	0	0	0
618223	Vertebral Anomalies And Variable Endocrine And T-cell Dysfunction	0	0	0	0	0	0	0	0	0	0	0	0	0	0	0	0
250940	Homocystinuria-megaloblastic Anemia, Cblg Complementation Type	0	0	0	0	0	0	0	0	0	0	0	0	0	0	0	0

## Sheet: Lung
Supplementary File 3B. Names of disease and cell type co-appearance in PubMed records in lung.
Disease\Phenotypic series accession (OMIM)	Disease\Phenotypic series name	cd8-positive, alpha-beta t cell	cd4-positive, alpha-beta t cell	adventitial cell	alveolar fibroblast	b cell	basal cell	basophil	bronchial smooth muscle cell	bronchial vessel endothelial cell	capillary aerocyte	capillary endothelial cell	classical monocyte	club cell	dendritic cell	endothelial cell of artery	endothelial cell of lymphatic vessel	fibroblast	intermediate monocyte	lung ciliated cell	lung microvascular endothelial cell	macrophage	mesothelial cell	myofibroblast cell	neutrophil	nk cell	non-classical monocyte	pericyte cell	plasma cell	plasmacytoid dendritic cell	pulmonary ionocyte	respiratory goblet cell	respiratory mucous cell	serous cell of epithelium of bronchus	smooth muscle cell	type i pneumocyte	type ii pneumocyte	vascular associated smooth muscle cell	vein endothelial cell
102700	Severe Combined Immunodeficiency, Autosomal Recessive, T Cell-negative,b Cell-negative, Nk Cell-negative, Due To Adenosine Deaminase Deficiency	0	0	0	0	0	0	0	0	0	0	0	0	0	0	0	0	0	0	0	0	0	0	0	0	0	0	0	0	0	0	0	0	0	0	0	0	0	0
PS235510	Hennekam lymphangiectasia-lymphedema syndrome	0	0	0	0	0	0	0	0	0	0	0	0	0	0	0	2	0	0	0	0	0	0	0	0	0	0	0	0	0	0	0	0	0	0	0	0	0	0
PS607426	Coenzyme Q10 deficiency, primary	0	0	0	0	0	0	0	0	0	0	0	0	0	0	0	0	0	0	0	0	0	0	0	0	0	0	0	0	0	0	0	0	0	0	0	0	0	0
137940	Hypotrichosis-lymphedema-telangiectasia-renal Defect Syndrome	0	0	0	0	0	0	0	0	0	0	0	0	0	0	0	0	0	0	0	0	0	0	0	0	0	0	0	0	0	0	0	0	0	0	0	0	0	0
PS122470	Cornelia de Lange syndrome	0	0	0	0	0	0	0	0	0	0	0	2	0	0	0	0	0	1	0	0	0	0	0	0	0	0	0	0	0	0	0	0	0	0	1	1	0	0
154700	Marfan Syndrome	0	0	9	0	0	0	0	1	0	0	0	0	1	0	5	0	2	0	0	0	2	0	2	0	0	0	0	0	0	0	0	0	0	24	1	1	43	0
615139	Facial Dysmorphism, Immunodeficiency, Livedo, And Short Stature	0	0	0	0	0	0	0	0	0	0	0	0	0	0	0	0	0	0	0	0	0	0	0	0	0	0	0	0	0	0	0	0	0	0	0	0	0	0
251230	Microcephaly-micromelia Syndrome	0	0	0	0	0	0	0	0	0	0	0	0	0	0	0	0	0	0	0	0	0	0	0	0	0	0	0	0	0	0	0	0	0	0	0	0	0	0
616651	Roifman Syndrome	0	0	0	0	0	0	0	0	0	0	0	0	0	0	0	0	0	0	0	0	0	0	0	0	0	0	0	0	0	0	0	0	0	0	0	0	0	0
PS211530	Brown-Vialetto-Van Laere syndrome	0	0	0	0	0	0	0	0	0	0	0	0	0	0	0	0	0	0	0	0	0	0	0	0	0	0	0	0	0	0	0	0	0	0	0	0	0	0
615934	Sting-associated Vasculopathy, Infantile-onset	0	0	0	0	0	0	0	0	0	0	0	0	0	0	0	0	0	0	0	0	0	0	0	0	0	0	0	0	0	0	0	0	0	0	0	0	0	0
PS173900	Polycystic kidney disease	0	0	1	0	0	7	1	1	0	0	2	0	1	0	4	7	0	0	0	0	0	3	8	0	0	0	4	0	0	0	0	0	0	1	1	2	2	1
PS135900	Coffin-Siris syndrome	0	0	0	0	0	0	0	0	0	0	0	0	0	0	0	0	0	0	0	0	0	0	0	0	0	0	0	0	0	0	0	0	0	0	0	0	0	0
PS231050	Geleophysic dysplasia	0	0	0	0	0	0	0	1	0	0	0	0	0	0	0	0	0	0	0	0	0	0	0	0	0	0	0	0	0	0	0	0	0	0	0	0	0	0
PS210900	Microcephaly, growth restriction and increased sister chromatid exchange	0	0	0	0	0	0	0	0	0	0	0	0	0	0	0	0	0	0	0	0	0	0	0	0	0	0	0	0	0	0	0	0	0	0	0	0	0	0
PS211400	Bronchiectasis	0	0	0	1	2	1	0	4	2	0	0	0	2	0	0	0	0	0	23	0	0	0	0	19	1	0	0	0	0	0	4	6	0	0	1	2	0	0
618213	Inflammatory Bowel Disease, Immunodeficiency, And Encephalopathy	0	0	0	0	0	0	0	0	0	0	0	0	0	0	0	0	0	0	0	0	0	0	0	0	1	0	0	0	0	0	0	0	0	0	0	0	0	0
PS614080	Multiple congenital anomalies-hypotonia-seizures syndrome	0	0	0	0	0	0	0	0	0	0	0	0	0	0	0	0	0	0	0	0	0	0	0	0	0	0	0	0	0	0	0	0	0	0	0	0	0	0
PS108800	Atrial septal defect	0	0	0	0	0	0	0	0	0	0	0	0	1	0	1	0	0	0	0	0	0	0	0	0	0	0	0	0	0	0	0	0	0	0	0	0	0	1
PS614372	Lectin complement activation pathway defects	0	0	0	0	1	0	0	0	0	0	0	0	0	0	0	0	0	0	0	0	0	0	0	0	0	0	0	0	0	0	0	0	0	0	0	0	0	1
601005	Timothy Syndrome	0	0	0	0	0	0	0	0	0	0	0	0	0	0	0	0	0	0	0	0	0	0	0	0	0	0	0	0	0	0	0	0	0	0	0	0	0	0
253550	Spinal Muscular Atrophy, Type Ii	0	0	0	0	0	0	0	0	0	0	0	0	3	0	0	0	0	0	0	0	0	0	0	0	0	0	0	0	0	0	0	0	0	0	0	0	0	0
601200	Pleuropulmonary Blastoma	0	0	0	2	0	0	0	0	0	0	0	0	0	0	0	0	0	0	0	0	0	1	1	0	0	0	0	0	0	0	0	0	0	0	1	0	0	0
612387	Sarcoidosis, Susceptibility To, 2	0	0	1	0	0	0	1	0	0	0	0	0	0	0	0	0	0	0	0	0	0	0	0	0	0	0	0	0	0	0	0	0	0	0	0	0	0	0
618278	Fibrosis, Neurodegeneration, And Cerebral Angiomatosis	0	0	0	0	0	0	0	0	0	0	0	0	0	0	0	0	0	0	0	0	0	0	1	0	0	0	0	0	0	0	0	0	0	0	0	0	0	0
193670	Whim Syndrome	0	0	0	0	0	0	0	0	0	0	0	0	0	0	0	0	0	0	0	0	0	0	0	0	2	0	0	2	2	0	0	0	0	0	0	0	0	0
PS609060	Combined oxidative phosphorylation deficiency	1	1	2	2	1	0	0	0	0	0	2	0	0	0	3	0	0	0	0	2	0	0	1	0	3	0	2	2	1	0	1	1	0	2	3	3	2	6
618021	Tetraamelia Syndrome 2	0	0	0	0	0	0	0	0	0	0	0	0	0	0	0	0	0	0	0	0	0	0	0	0	0	0	0	0	0	0	0	0	0	0	0	0	0	0
PS309800	Microphthalmia, syndromic	0	0	0	0	0	0	0	0	0	0	0	0	1	0	0	0	0	0	0	0	0	0	0	0	0	0	0	0	0	0	0	0	0	0	0	0	0	1
263210	Gillessen-kaesbach-nishimura Syndrome	0	0	0	0	0	0	0	0	0	0	0	0	0	0	0	0	0	0	0	0	0	0	0	0	0	0	0	0	0	0	0	0	0	0	0	0	0	0
PS191100	Tuberous sclerosis	0	0	5	2	1	2	0	1	0	0	0	0	2	1	1	2	3	0	0	0	1	1	6	0	0	0	5	2	1	0	0	0	0	16	27	42	9	0
617478	Structural Heart Defects And Renal Anomalies Syndrome	0	0	0	0	0	0	0	0	0	0	0	0	0	0	0	0	0	0	0	0	0	0	0	0	0	0	0	0	0	0	0	0	0	0	0	0	1	0
PS308230	Immunodeficiency with hyper-IgM	0	0	0	0	6	0	0	0	0	0	0	1	0	0	0	0	0	0	1	0	0	0	0	0	0	0	0	3	0	0	0	1	0	0	0	0	0	0
PS268310	Robinow syndrome	0	0	0	0	0	0	0	0	0	0	0	0	0	0	0	1	0	0	0	0	0	0	0	0	0	0	0	0	0	0	0	0	0	0	0	0	0	0
208530	Asplenia With Cardiovascular Anomalies	0	0	0	0	1	0	0	0	0	0	0	0	0	0	0	0	0	0	0	0	0	0	0	1	0	0	0	0	0	0	0	0	0	0	0	0	0	0
PS300345	Microphthalmia, isolated, with coloboma	0	0	0	0	0	0	0	0	0	0	0	0	1	0	0	0	0	0	0	0	0	0	0	0	0	0	0	0	0	0	0	0	0	0	0	0	0	0
614748	Interstitial Lung Disease, Nephrotic Syndrome, And Epidermolysis Bullosa, Congenital	0	0	0	0	0	0	0	0	0	0	0	0	0	0	0	0	0	0	0	0	0	0	0	0	0	0	0	0	0	0	0	0	0	0	0	0	0	0
PS265450	Pulmonary venoocclusive disease	0	0	1	0	0	0	0	0	1	0	2	0	0	0	1	0	0	0	0	3	0	0	4	0	0	0	1	0	0	0	0	0	0	1	1	2	4	3
617175	Retinal Dystrophy With Or Without Extraocular Anomalies	0	0	0	0	0	0	0	0	0	0	0	0	0	0	0	0	0	0	0	0	0	0	0	0	0	0	0	0	0	0	0	0	0	0	0	0	0	0
PS607596	Pontocerebellar hypoplasia	0	0	0	0	0	0	0	0	0	0	0	0	0	0	0	0	0	0	0	0	0	0	0	0	0	0	0	0	0	0	0	0	0	0	0	0	0	0
616050	Autoinflammation With Infantile Enterocolitis	0	0	0	0	0	0	0	0	0	0	0	0	0	0	0	0	0	0	0	0	0	0	0	0	0	0	0	0	0	0	0	0	0	0	0	0	0	0
PS604273	Mitochondrial complex V (ATP synthase) deficiency, nuclear type	0	0	0	0	0	0	0	0	0	0	0	0	0	0	0	0	0	0	0	0	0	0	0	0	0	0	0	0	0	0	0	0	0	0	0	0	0	0
618950	Suleiman-el-hattab Syndrome	0	0	0	0	0	0	0	0	0	0	0	0	0	0	0	0	0	0	0	0	0	0	0	0	0	0	0	0	0	0	0	0	0	0	0	0	0	0
226300	Complement Hyperactivation, Angiopathic Thrombosis, And Protein-losing Enteropathy	0	0	0	0	0	0	0	0	0	0	0	0	0	0	0	0	0	0	0	0	0	0	0	0	0	0	0	0	0	0	0	0	0	0	0	0	0	0
271665	Spondylometaepiphyseal Dysplasia, Short Limb-hand Type	0	0	0	0	0	0	0	0	0	0	0	0	0	0	0	0	0	0	0	0	0	0	0	0	0	0	0	0	0	0	0	0	0	0	0	0	0	0
615704	Poikiloderma, Hereditary Fibrosing, With Tendon Contractures, Myopathy,and Pulmonary Fibrosis	0	0	0	0	0	0	0	0	0	0	0	0	0	0	0	0	0	0	0	0	0	0	0	0	0	0	0	0	0	0	0	0	0	0	0	0	0	0
253300	Spinal Muscular Atrophy, Type I	0	0	1	0	0	0	0	0	0	0	0	0	3	0	0	0	0	0	0	0	0	0	0	0	0	0	1	0	0	0	0	0	0	0	0	0	0	0
615688	Vasculitis, Autoinflammation, Immunodeficiency, And Hematologic Defects Syndrome	0	0	0	0	0	0	0	0	0	0	0	1	0	0	0	0	0	1	0	0	0	0	0	0	0	0	0	0	0	0	0	0	0	0	0	0	0	0
192430	Velocardiofacial Syndrome	3	4	0	0	1	0	0	0	0	0	0	1	2	0	0	3	1	0	0	0	0	0	0	0	2	0	0	1	1	0	0	0	0	1	0	0	1	0
PS300291	Ectodermal dysplasia and immune deficiency	0	0	0	0	0	0	0	0	0	0	0	0	0	0	0	0	0	0	0	0	0	0	0	1	0	0	0	1	0	0	0	0	0	0	0	0	0	0
PS147920	Kabuki syndrome	0	0	0	0	0	0	0	0	0	0	0	0	0	0	0	0	0	0	0	0	0	0	0	0	0	0	0	0	0	0	0	0	0	0	0	0	0	0
PS214100	Peroxisome biogenesis disorder	0	0	0	0	0	0	0	1	0	0	0	0	0	0	2	0	0	0	0	0	0	0	0	0	0	0	0	0	0	0	0	0	0	3	1	1	1	1
PS180849	Rubinstein-Taybi syndrome	0	0	0	0	0	0	0	0	0	0	0	0	0	0	0	0	1	0	0	0	0	0	0	0	0	0	0	0	0	0	0	0	0	0	0	0	0	0
PS162400	Hereditary sensory and autonomic neuropathy	0	0	0	0	0	0	1	0	0	0	0	1	1	0	0	0	2	0	0	0	0	0	0	0	0	0	0	0	0	0	0	0	0	0	0	0	1	0
PS257300	Mosaic variegated aneuploidy syndrome	0	0	0	0	0	0	0	0	0	0	0	0	0	0	0	0	0	0	0	0	0	0	0	0	0	0	0	0	0	0	0	0	0	0	0	0	0	0
PS156200	Mental retardation, autosomal dominant	0	0	0	0	0	0	0	0	0	0	0	0	1	0	0	0	0	1	0	0	0	0	1	0	0	0	0	0	0	0	0	0	0	0	0	1	1	0
251260	Nijmegen Breakage Syndrome	1	1	0	0	3	1	0	0	0	0	0	0	1	0	0	0	2	0	0	0	0	0	0	0	0	0	0	0	0	0	0	0	0	1	0	0	0	0
610984	Complement Factor I Deficiency	0	0	0	0	0	0	0	0	0	0	0	0	0	0	0	0	0	0	0	0	0	0	0	0	0	0	0	0	0	0	0	0	0	0	0	0	0	0
PS147060	Hyper-IgE recurrent infection syndrome	0	0	0	1	1	0	1	0	0	0	0	1	0	0	0	0	0	0	0	0	0	0	0	3	1	0	0	2	0	0	0	1	0	0	0	0	0	0
PS277300	Spondylocostal dysostosis	0	0	0	0	0	0	0	0	0	0	0	0	0	0	0	0	0	0	0	0	0	0	0	0	0	0	0	0	0	0	0	0	0	0	0	0	0	0
617180	Chitayat Syndrome	0	0	1	1	0	0	0	0	0	0	0	0	1	0	0	0	0	0	0	0	0	0	1	0	0	0	1	0	0	0	0	0	0	1	0	0	2	0
613854	Congenital Heart Defects, Multiple Types, 6	0	0	0	0	0	0	0	0	0	0	0	0	0	0	0	0	0	0	0	0	0	0	0	0	0	0	0	0	0	0	0	0	0	0	0	0	0	0
PS218330	Cranioectodermal dysplasia	0	0	0	0	0	0	0	0	0	0	0	0	0	0	0	0	0	0	0	0	0	0	0	0	0	0	0	0	0	0	0	0	0	0	0	0	0	0
275210	Tight Skin Contracture Syndrome, Lethal	0	0	0	0	0	0	0	0	0	0	0	0	0	0	0	0	0	0	0	0	0	0	0	0	0	0	0	0	0	0	0	0	0	0	0	0	0	0
PS607014	Mucopolysaccharidoses	0	0	10	1	0	2	3	0	0	0	0	0	0	0	1	0	11	1	0	0	1	1	3	0	0	0	9	4	0	0	0	0	0	1	0	0	2	0
PS227650	Fanconi anemia	0	1	0	0	2	2	0	0	0	0	0	2	2	0	1	1	10	1	0	0	0	0	0	1	2	0	0	1	0	0	0	0	0	0	0	0	0	1
PS607095	Anauxetic dysplasia	0	0	0	0	0	0	0	0	0	0	0	0	0	0	0	0	0	0	0	0	0	0	0	0	0	0	0	0	0	0	0	0	0	0	0	0	0	0
606170	Genitopatellar Syndrome	0	0	0	0	0	0	0	0	0	0	0	0	0	0	0	0	0	0	0	0	0	0	0	0	0	0	0	0	0	0	0	0	0	0	0	0	0	0
611943	Riddle Syndrome	0	0	0	0	0	0	0	0	0	0	0	0	0	0	0	0	0	0	0	0	0	0	0	0	0	0	0	0	0	0	0	0	0	0	0	0	0	0
PS242860	Immunodeficiency-centromeric instability-facial anomalies	0	0	0	0	0	0	0	0	0	0	0	0	0	0	0	0	0	0	0	0	0	0	0	0	0	0	0	0	0	0	0	0	0	0	0	0	0	0
PS614742	Pulmonary fibrosis and/or bone marrow failure, telomere-related	0	1	4	382	0	2	1	11	3	0	6	2	8	1	2	3	68	1	4	19	10	7	200	5	0	0	3	1	1	0	3	3	0	3	326	326	6	4
PS192600	Cardiomyopathy, familial hypertrophic	0	0	0	0	0	0	0	0	0	0	0	0	0	0	0	0	0	0	0	0	0	0	1	0	0	0	0	0	0	0	0	0	0	0	0	0	0	0
150550	Periodic Fever, Immunodeficiency, And Thrombocytopenia Syndrome	0	0	0	0	0	0	0	0	0	0	0	0	0	0	0	0	0	0	0	0	0	0	0	0	0	0	0	0	0	0	0	0	0	0	0	0	0	0
259775	Raine Syndrome	0	0	0	0	0	0	0	0	0	0	0	0	0	0	0	0	0	0	0	0	0	0	0	0	0	0	0	0	0	0	0	0	0	0	0	0	0	0
PS616866	Spinal muscular atrophy with congenital bone fractures	0	0	0	0	0	0	0	0	0	0	0	0	0	0	0	0	0	0	0	0	0	0	0	0	0	0	0	0	0	0	0	0	0	0	0	0	0	0
PS166200	Osteogenesis imperfecta	0	0	0	2	0	1	0	0	0	0	0	0	0	1	0	0	2	0	0	0	0	0	0	0	0	0	1	2	0	0	0	0	0	0	0	0	1	0
PS213300	Joubert syndrome	0	0	0	0	0	4	0	0	0	0	0	0	0	0	0	0	0	0	0	0	0	0	0	0	0	0	0	0	0	0	0	0	0	0	0	0	0	0
300853	Immunodeficiency, X-linked, With Magnesium Defect, Epstein-barr Virus Infection And Neoplasia	0	0	0	0	0	0	0	0	0	0	0	0	0	0	0	0	0	0	0	0	0	0	0	0	0	0	0	0	0	0	0	0	0	0	0	0	0	0
616100	Autoimmune Lymphoproliferative Syndrome, Type V	0	0	0	0	0	0	0	0	0	0	0	0	0	0	0	0	0	0	0	0	0	0	0	0	0	0	0	0	0	0	0	0	0	0	0	0	0	0
614327	Tumor Predisposition Syndrome	0	0	0	0	3	5	0	0	0	0	0	1	2	2	1	1	0	0	0	1	0	2	1	2	2	0	0	2	5	0	1	1	0	1	0	0	2	1
208900	Ataxia-telangiectasia	4	4	1	0	3	5	0	0	0	0	2	1	2	2	4	0	15	1	0	0	0	1	4	1	2	0	1	0	1	0	0	0	0	4	3	3	8	2
262850	Plasmin Inhibitor Deficiency	0	0	0	0	0	0	0	0	0	0	0	0	0	0	0	0	0	0	0	0	0	0	0	0	0	0	0	0	0	0	0	0	0	0	0	0	0	0
PS607594	Immunodeficiency, common variable	4	3	0	0	72	0	0	0	0	0	1	2	1	4	0	0	0	1	0	0	0	0	0	0	4	1	0	29	10	0	0	1	0	0	0	0	2	0
PS615952	Autoimmune disease, multisystem, infantile-onset	0	0	0	0	0	0	0	0	0	0	0	0	0	0	0	0	0	0	0	0	0	0	0	0	0	0	0	0	0	0	0	0	0	0	0	0	0	0
265100	Pulmonary Alveolar Microlithiasis	0	0	0	3	0	0	0	0	0	0	0	0	0	0	0	0	0	0	0	0	0	0	0	0	0	0	0	0	0	0	0	0	0	0	7	7	0	0
602079	Trimethylaminuria	0	0	0	0	0	0	0	0	0	0	0	0	0	0	0	0	0	0	0	0	0	0	0	0	0	0	0	0	0	0	0	0	0	0	0	0	0	0
233650	Combined Cellular And Humoral Immune Defects With Granulomas	0	0	0	0	1	0	0	0	0	0	0	0	0	0	0	0	0	0	0	0	0	0	0	0	0	0	0	0	0	0	0	0	0	0	0	0	0	0
PS236680	Hydrolethalus syndrome	0	0	0	0	0	1	0	0	0	0	0	0	0	0	0	0	0	0	0	0	0	0	0	0	0	0	0	0	0	0	0	0	0	0	0	0	0	0
135150	Birt-hogg-dube Syndrome	0	0	0	0	2	0	0	0	0	0	0	0	0	0	0	0	0	0	0	0	0	2	0	0	0	0	0	0	0	0	0	0	0	0	3	2	0	0
616414	Autoimmune Interstitial Lung, Joint, And Kidney Disease	0	0	0	0	0	0	0	0	0	0	0	0	0	0	0	0	0	0	0	0	0	0	0	0	0	0	0	0	0	0	0	0	0	0	0	0	0	0
PS123700	Cutis laxa	0	0	0	2	0	0	0	0	0	0	0	0	0	0	0	0	2	0	0	0	0	0	1	1	0	0	0	0	0	0	0	0	0	0	0	0	0	0
252500	Mucolipidosis Ii Alpha/beta	0	0	2	1	0	0	0	0	0	0	0	0	0	0	0	0	5	0	0	0	0	1	1	0	1	0	2	1	0	0	0	0	0	1	0	0	1	0
PS244400	Primary ciliary dyskinesia	0	0	0	0	0	9	0	0	0	0	0	1	3	0	0	0	1	0	52	0	0	0	0	5	0	0	0	0	0	1	7	9	0	1	1	1	0	0
604571	Bare Lymphocyte Syndrome, Type I	0	0	0	0	0	0	0	0	0	0	0	0	0	0	0	0	0	0	0	0	0	0	0	0	0	0	0	0	0	0	0	0	0	0	0	0	0	0
610798	Immunodeficiency Due To Defect In Mapbp-interacting Protein	0	0	0	0	0	0	0	0	0	0	0	0	0	0	0	0	0	0	0	0	0	0	0	0	0	0	0	0	0	0	0	0	0	0	0	0	0	0
618618	Spondyloepiphyseal Dysplasia, Nishimura Type	0	0	0	0	0	0	0	0	0	0	0	0	0	0	0	0	0	0	0	0	0	0	0	0	0	0	0	0	0	0	0	0	0	0	0	0	0	0
PS309510	Mental retardation, X-linked syndromic	0	0	3	0	0	0	0	0	0	0	0	0	1	0	0	0	1	0	0	0	0	0	0	0	0	0	3	0	0	0	0	0	0	0	0	0	0	0
613179	Immunodeficiency Due To Purine Nucleoside Phosphorylase Deficiency	0	0	0	0	1	0	0	0	0	0	0	0	0	0	0	0	0	0	0	0	0	0	0	0	0	0	0	0	0	0	0	0	0	0	0	0	0	0
614962	Leptin Deficiency Or Dysfunction	0	0	0	0	0	0	0	0	0	0	0	0	0	0	0	1	0	0	0	0	0	0	0	0	1	0	0	0	0	0	0	0	0	1	0	0	1	0
231680	Multiple Acyl-coa Dehydrogenase Deficiency	0	0	0	0	0	0	0	0	0	0	0	0	0	0	0	0	0	0	0	0	0	0	0	0	0	0	0	0	0	0	0	0	0	0	0	0	0	0
PS203300	Hermansky-Pudlak syndrome	0	0	0	5	0	1	1	1	0	0	1	1	0	0	0	0	0	0	0	0	0	0	0	0	1	0	0	0	1	0	0	0	0	0	15	16	0	0
607616	Niemann-pick Disease, Type B	0	0	0	0	0	0	0	0	0	0	0	1	0	0	0	0	0	0	0	0	0	0	0	0	0	0	0	0	0	0	0	0	0	0	0	0	0	0
608971	Severe Combined Immunodeficiency, Autosomal Recessive, T Cell-negative,b Cell-positive, Nk Cell-positive	0	0	0	0	0	0	0	0	0	0	0	0	0	0	0	0	0	0	0	0	0	0	0	0	0	0	0	0	0	0	0	0	0	0	0	0	0	0
618975	Myopathy, Congenital, With Diaphragmatic Defects, Respiratory Insufficiency, And Dysmorphic Facies	0	0	0	0	0	0	0	0	0	0	0	0	0	0	0	0	0	0	0	0	0	0	0	0	0	0	0	0	0	0	0	0	0	0	0	0	0	0
300707	Toe Syndactyly, Telecanthus, And Anogenital And Renal Malformations	0	0	0	0	0	0	0	0	0	0	0	0	0	0	0	0	0	0	0	0	0	0	0	0	0	0	0	0	0	0	0	0	0	0	0	0	0	0
PS202700	Neutropenia, severe congenital	0	0	0	0	1	0	0	0	0	0	0	2	0	0	0	0	0	1	0	0	0	0	0	15	1	0	0	0	0	0	0	0	0	0	1	1	0	0
232300	Glycogen Storage Disease Ii	0	0	0	0	0	0	0	1	0	0	0	0	0	0	0	0	1	0	0	0	0	0	0	0	0	0	0	4	0	0	0	0	0	0	0	0	0	0
PS184840	Otospondylomegaepiphyseal dysplasia	0	0	0	0	0	0	0	0	0	0	0	0	0	0	0	0	0	0	0	0	0	0	0	0	0	0	0	0	0	0	0	0	0	0	0	0	0	0
618175	Warburg-cinotti Syndrome	0	0	0	0	0	0	0	0	0	0	0	0	0	0	0	0	0	0	0	0	0	0	0	0	0	0	0	0	0	0	0	0	0	0	0	0	0	0
602535	Marshall-smith Syndrome	0	0	0	0	0	0	0	0	0	0	0	0	0	0	0	0	0	0	0	0	0	0	0	0	0	0	0	0	0	0	0	0	0	0	0	0	0	0
264350	Pseudohypoaldosteronism, Type I, Autosomal Recessive	0	0	0	0	0	0	0	0	0	0	0	1	0	0	0	0	0	0	2	0	0	0	0	0	0	0	0	0	0	0	0	0	0	0	0	0	2	0
612852	Interleukin 1 Receptor Antagonist Deficiency	0	0	0	0	0	0	0	0	0	0	0	0	0	0	0	0	0	0	0	0	0	0	0	0	0	0	0	0	0	0	0	0	0	0	0	0	0	0
PS108120	Arthrogryposis, distal	0	0	0	0	0	0	0	0	0	0	0	0	3	0	0	0	0	0	0	0	0	0	0	0	0	0	0	0	0	0	0	0	0	0	0	0	0	0
181000	Sarcoidosis, Susceptibility To, 1	0	1	0	1	0	0	1	0	0	0	0	0	0	1	0	0	0	0	0	0	0	0	0	0	0	0	0	0	1	0	0	0	0	0	0	0	0	0
PS153100	Lymphatic malformation	3	5	7	2	1	1	1	0	0	0	12	0	2	0	4	176	0	0	0	0	1	6	3	0	1	0	10	7	1	0	0	0	0	2	2	2	7	5
184260	Osteochondrodysplasia	1	0	1	0	0	1	0	0	0	0	1	0	2	0	0	0	0	2	0	0	0	0	1	0	0	0	1	1	0	0	0	0	0	0	0	0	2	0
300209	Simpson-golabi-behmel Syndrome, Type 2	0	0	0	0	0	0	0	0	0	0	0	0	0	0	0	0	0	0	0	0	0	0	0	0	0	0	0	0	0	0	0	0	0	0	0	0	0	0
616368	Chops Syndrome	0	0	0	0	0	0	0	0	0	0	0	0	0	0	0	0	0	0	0	0	0	0	0	0	0	0	0	0	0	0	0	0	0	0	0	0	0	0
159950	Spinal Muscular Atrophy With Progressive Myoclonic Epilepsy	0	0	0	0	0	0	0	0	0	0	0	0	0	0	0	0	0	0	0	0	0	0	0	0	0	0	0	0	0	0	0	0	0	0	0	0	0	0
618493	Hypotonia, Hyperventilation, Impaired Intellectual Development, Dysautonomia, Epilepsy, And Eye Abnormalities	0	0	0	0	0	0	0	0	0	0	0	0	0	0	0	0	0	0	0	0	0	0	0	0	0	0	0	0	0	0	0	0	0	0	0	0	0	0
175050	Juvenile Polyposis/hereditary Hemorrhagic Telangiectasia Syndrome	0	0	0	0	0	0	0	0	0	0	0	0	0	0	0	0	0	0	0	0	0	0	0	0	0	0	0	0	0	0	0	0	0	0	0	0	0	0
616260	Tenorio Syndrome	0	0	0	0	0	0	0	0	0	0	0	0	0	0	0	0	0	0	0	0	0	0	0	0	0	0	0	0	0	0	0	0	0	0	0	0	0	0
176270	Prader-willi Syndrome	0	0	0	0	0	0	0	0	0	0	0	0	1	0	0	0	0	0	0	0	0	0	0	0	0	0	0	0	0	0	0	0	0	0	0	0	0	1
PS306955	Heterotaxy, visceral	0	0	0	0	1	0	0	0	0	0	0	0	0	0	0	0	0	0	0	0	0	0	0	1	0	0	0	0	0	0	0	0	0	0	0	0	0	0
PS253600	Muscular dystrophy, limb-girdle, autosomal recessive	0	0	0	0	0	0	0	0	0	0	0	0	0	0	0	0	0	0	0	0	0	0	0	0	0	0	0	0	0	0	0	0	0	0	0	0	0	0
614878	Autoinflammation, Antibody Deficiency, And Immune Dysregulation, Plcg2-associated	0	0	0	0	0	0	0	0	0	0	0	0	0	0	0	0	0	0	0	0	0	0	0	0	0	0	0	0	0	0	0	0	0	0	0	0	0	0
PS253310	Lethal congenital contracture syndrome	0	0	0	0	0	0	0	1	0	0	0	0	0	0	0	0	0	0	0	0	0	0	0	0	0	0	0	0	0	0	0	0	0	0	0	0	0	0
273395	Tetra-amelia, Autosomal Recessive	0	0	0	0	0	0	0	0	0	0	0	0	0	0	0	0	0	0	0	0	0	0	0	0	0	0	0	0	0	0	0	0	0	0	0	0	0	0
617780	Combined Immunodeficiency And Megaloblastic Anemia With Or Without Hyperhomocysteinemia	0	0	0	0	0	0	0	0	0	0	0	0	0	0	0	0	0	0	0	0	0	0	0	0	0	0	0	0	0	0	0	0	0	0	0	0	0	0
267430	Renal Tubular Dysgenesis	0	0	0	0	0	0	0	0	0	0	0	0	0	0	0	0	0	0	0	0	0	0	0	0	0	0	0	0	0	0	0	0	0	0	0	0	0	0
219700	Cystic Fibrosis	0	0	0	1	0	5	1	2	0	0	1	0	1	0	0	0	1	0	5	0	1	1	0	4	0	0	0	0	0	2	1	8	0	0	5	4	0	0
PS208150	Fetal akinesia deformation sequence	0	0	0	0	0	0	0	0	0	0	0	0	0	0	0	0	0	0	0	0	0	0	0	0	0	0	0	0	0	0	0	0	0	0	0	0	0	0
606690	Lymphangioleiomyomatosis	0	0	1	5	0	0	0	6	1	0	0	0	0	0	1	15	1	0	1	1	0	1	3	0	0	0	1	0	0	0	1	1	0	14	20	28	5	1
PS114580	Familial candidiasis	0	0	0	0	0	0	0	0	0	0	0	1	0	0	0	0	0	0	0	0	0	0	0	1	1	0	0	0	0	0	0	0	0	0	0	0	0	0
224410	Dyssegmental Dysplasia, Silverman-handmaker Type	0	0	0	0	0	0	0	0	0	0	0	0	0	0	0	0	0	0	0	0	0	0	0	0	0	0	0	0	0	0	0	0	0	0	0	0	0	0
158310	Mucoepithelial Dysplasia, Hereditary	0	0	0	0	0	0	0	0	0	0	0	0	0	0	0	0	0	0	0	0	0	0	0	0	0	0	0	0	0	0	0	0	0	0	0	0	0	0
PS235200	Hemochromatosis	1	1	0	0	0	0	1	0	0	0	0	2	0	0	0	0	0	0	0	0	0	2	4	0	0	0	0	2	0	0	0	0	0	1	1	1	1	1
308050	Congenital Hemidysplasia With Ichthyosiform Erythroderma And Limb Defects	0	0	0	0	0	0	0	0	0	0	0	0	0	0	0	0	0	0	0	0	0	0	0	0	0	0	0	0	0	0	0	0	0	0	0	0	0	0
PS617468	Arthrogryposis multiplex congenita	0	0	0	0	0	0	0	0	0	0	0	0	9	0	0	0	0	0	0	0	0	0	0	0	0	0	0	1	0	0	0	0	0	0	0	0	0	0
PS259700	Osteopetrosis, autosomal recessive	0	0	0	0	0	0	0	0	0	0	0	0	0	0	0	0	0	4	0	0	0	0	0	0	0	0	0	0	0	0	0	0	0	0	0	0	0	0
608957	Cd8 Deficiency, Familial	0	0	0	0	0	0	0	0	0	0	0	0	0	0	0	0	0	0	0	0	0	0	0	0	0	0	0	0	0	0	0	0	0	0	0	0	0	0
618497	Neurodevelopmental Disorder With Seizures And Nonepileptic Hyperkinetic Movements	0	0	0	0	0	0	0	0	0	0	0	0	0	0	0	0	0	0	0	0	0	0	0	0	0	0	0	0	0	0	0	0	0	0	0	0	0	0
PS220110	Mitochondrial complex IV deficiency, nuclear-type	0	0	0	0	0	0	0	0	0	0	0	0	0	0	0	0	0	0	0	0	0	0	0	0	0	0	0	0	0	0	0	0	0	0	0	0	0	0
PS209900	Bardet-Biedl syndrome	0	0	0	0	0	7	0	0	0	0	0	0	1	0	1	0	0	0	2	0	0	0	0	0	0	0	0	0	0	0	1	1	0	1	0	0	2	1
PS108720	Atelosteogenesis	0	0	0	0	0	0	0	0	0	0	0	0	0	0	0	0	0	0	0	0	0	0	0	0	0	0	0	0	0	0	0	0	0	0	0	0	0	0
PS208540	Renal-hepatic-pancreatic dysplasia	0	0	0	0	0	0	0	0	0	0	0	0	0	0	0	0	0	0	0	0	0	0	0	0	0	0	0	0	0	0	0	0	0	0	0	0	0	0
152700	Systemic Lupus Erythematosus	0	0	0	0	12	0	0	0	0	0	0	0	0	7	0	0	0	0	0	1	1	1	0	7	0	0	0	2	12	0	0	0	0	0	0	0	0	0
PS265120	Surfactant metabolism dysfunction, pulmonary	0	0	0	25	0	0	0	1	0	0	2	0	7	0	1	0	0	0	3	5	1	1	3	2	0	0	1	0	0	0	3	3	0	1	133	138	0	1
312870	Simpson-golabi-behmel Syndrome, Type 1	0	0	0	0	0	2	0	0	0	0	0	0	0	0	0	0	0	0	0	0	0	0	0	0	0	0	0	0	0	0	0	0	0	0	0	0	0	0
607271	Autoimmune Lymphoproliferative Syndrome, Type Iib	3	4	0	0	7	0	0	0	0	0	0	0	0	1	0	0	0	0	0	0	0	0	0	1	0	0	0	4	2	0	0	0	0	0	0	0	0	0
610978	Choreoathetosis, Hypothyroidism, And Neonatal Respiratory Distresschoreoathetosis And Congenital Hypothyroidism, Included	0	0	0	0	0	0	0	0	0	0	0	0	0	0	0	0	0	0	0	0	0	0	0	0	0	0	0	0	0	0	0	0	0	0	0	0	0	0
615486	Interstitial Lung And Liver Disease	0	0	1	10	0	0	0	0	0	0	0	0	1	0	1	0	1	0	0	1	2	1	9	0	0	0	0	2	0	0	0	0	0	0	13	14	0	0
PS184255	Spondylometaphyseal dysplasia	0	0	0	0	0	0	0	0	0	0	0	0	0	0	0	0	0	0	0	0	0	0	0	0	0	0	0	0	0	0	0	0	0	0	0	0	0	0
618806	T-cell Lymphopenia, Infantile, With Or Without Nail Dystrophy, Autosomal Dominant	0	0	0	0	0	0	0	0	0	0	0	0	0	0	0	0	0	0	0	0	0	0	0	0	0	0	0	0	0	0	0	0	0	0	0	0	0	0
619036	Myopathy, Epilepsy, And Progressive Cerebral Atrophy	0	0	0	0	0	0	0	0	0	0	0	0	0	0	0	0	0	0	0	0	0	0	0	0	0	0	0	0	0	0	0	0	0	0	0	0	0	0
PS176670	Progeria	0	0	4	0	0	1	1	0	0	0	3	0	0	0	3	0	10	0	0	0	0	0	2	0	0	0	0	0	0	0	0	0	0	13	0	0	15	2
261740	Glycogen Storage Disease Of Heart, Lethal Congenital	0	0	0	0	0	0	0	0	0	0	0	0	0	0	0	0	0	0	0	0	0	0	0	0	0	0	0	0	0	0	0	0	0	0	0	0	0	0
612289	Fontaine Progeroid Syndrome	0	0	0	0	0	0	0	0	0	0	0	0	0	0	0	0	0	0	0	0	0	0	0	0	0	0	0	0	0	0	0	0	0	0	0	0	0	0
PS208500	Short-rib thoracic dysplasia	0	0	0	0	0	0	0	0	0	0	0	0	0	0	0	0	0	0	0	0	0	0	0	0	0	0	0	0	0	0	0	0	0	0	0	0	0	0
600802	Scid, Autosomal Recessive, T-negative/b-positive Type	0	0	0	0	0	0	0	0	0	0	0	0	0	0	0	0	0	0	0	0	0	0	0	0	0	0	0	0	0	0	0	0	0	0	0	0	0	0
613490	Alpha-1-antitrypsin Deficiency	0	0	0	0	0	0	0	0	0	0	2	1	1	0	1	0	1	2	1	2	1	0	1	10	1	1	0	0	0	0	1	1	0	0	5	3	1	0
601457	Severe Combined Immunodeficiency, Autosomal Recessive, T Cell-negative,b Cell-negative, Nk Cell-positive	0	0	0	0	0	0	0	0	0	0	0	0	0	0	0	0	0	0	0	0	0	0	0	0	0	0	0	0	0	0	0	0	0	0	0	0	0	0
222700	Lysinuric Protein Intolerance	0	0	0	2	0	0	0	0	0	0	0	0	0	0	0	0	1	0	0	0	0	0	0	0	0	0	0	0	0	0	0	0	0	0	1	1	0	0
257200	Niemann-pick Disease, Type A	0	0	0	0	0	0	0	0	0	0	0	1	0	0	0	0	0	1	0	0	0	0	1	0	0	0	0	0	0	0	0	0	0	0	1	1	0	0
PS614429	Ventricular septal defect	0	0	0	0	0	0	0	0	0	0	0	0	0	0	1	0	0	0	0	0	0	0	0	0	0	0	0	0	0	0	0	1	0	0	0	0	2	1
PS614328	Neonatal inflammatory skin and bowel disease	0	0	0	0	0	0	0	0	0	0	0	0	0	0	0	0	0	0	0	0	0	0	0	0	0	0	0	0	0	0	0	0	0	0	0	0	0	0
615508	Erythroderma, Congenital, With Palmoplantar Keratoderma, Hypotrichosis, And Hyper-ige	0	0	0	0	0	0	0	0	0	0	0	0	0	0	0	0	0	0	0	0	0	0	0	0	0	0	0	0	0	0	0	0	0	0	0	0	0	0
178500	Pulmonary Fibrosis, Idiopathic	0	1	11	458	3	7	2	15	3	0	3	4	18	3	5	4	124	2	16	16	9	22	409	4	1	0	11	2	3	0	5	6	1	8	496	483	16	4
PS219000	Fraser syndrome	0	0	0	0	0	1	0	0	0	0	0	1	1	0	0	0	0	1	0	0	0	1	0	0	0	0	0	0	0	0	0	0	0	1	1	1	0	0
185500	Supravalvular Aortic Stenosis	0	0	1	0	0	0	0	0	0	0	0	0	0	0	1	0	0	0	0	0	0	0	0	0	0	0	0	0	0	0	0	0	0	7	0	0	11	0
PS300000	Opitz GBBB syndrome	0	0	0	0	0	0	0	0	0	0	0	0	0	0	0	0	0	0	0	0	0	0	0	0	0	0	0	0	0	0	0	0	0	0	0	0	0	0
255320	Minicore Myopathy With External Ophthalmoplegia	0	0	0	0	0	0	0	0	0	0	0	0	0	0	0	0	0	0	0	0	0	0	0	0	0	0	0	0	0	0	0	0	0	0	0	0	0	0
270400	Smith-lemli-opitz Syndrome	0	0	0	0	0	0	0	0	0	0	0	0	0	0	0	0	0	0	0	0	0	0	0	0	0	0	0	0	0	0	0	0	0	0	1	1	0	0
617602	Congenital Heart Defects And Skeletal Malformations Syndrome	0	0	0	0	0	0	0	0	0	0	0	0	0	0	0	0	0	0	0	0	1	0	0	0	0	0	0	0	0	0	0	0	0	0	0	0	2	0
PS249000	Meckel syndrome	0	0	0	0	0	1	0	0	0	0	0	0	1	0	0	0	0	0	0	0	0	0	0	0	0	0	0	0	0	0	0	0	0	0	0	0	0	0
PS601495	Agammaglobulinemia	0	0	0	0	138	1	18	0	0	0	1	5	0	7	0	0	0	5	0	0	1	0	1	6	3	0	0	64	6	0	0	0	0	0	0	0	0	1
230900	Gaucher Disease, Type Ii	0	0	3	2	3	1	0	0	0	0	1	6	0	4	0	0	2	3	0	0	7	1	0	2	0	2	2	6	5	0	0	0	0	0	0	0	0	0
PS252010	Mitochondrial complex I deficiency, nuclear type	0	0	0	0	0	0	0	0	0	0	0	0	0	0	0	0	0	0	0	0	0	0	0	0	0	0	0	0	0	0	0	0	0	0	0	0	0	0
PS306400	Granulomatous disease, chronic	2	6	1	3	9	1	1	0	0	0	1	18	0	3	0	3	2	29	0	0	13	1	4	112	5	1	0	9	6	0	0	2	0	0	1	3	1	0
613385	Autoimmune Disease, Multisystem, With Facial Dysmorphism	0	0	0	0	0	0	0	0	0	0	0	0	0	0	0	0	0	0	0	0	0	0	0	0	0	0	0	0	0	0	0	0	0	0	0	0	0	0
218040	Costello Syndrome	0	0	0	0	0	0	0	0	0	0	0	0	2	0	0	0	1	0	0	0	0	0	1	0	0	0	0	0	0	0	0	0	0	0	0	0	0	0
617053	Mirage Syndrome	0	0	0	0	0	0	0	0	0	0	0	0	1	0	0	0	0	0	0	0	0	0	0	0	0	0	0	0	0	0	0	0	0	0	0	0	0	0
170100	Prolidase Deficiency	0	0	0	0	0	0	0	0	0	0	0	0	0	0	0	0	3	0	0	0	0	0	0	0	0	0	0	0	0	0	0	0	0	0	0	0	0	0
PS178600	Pulmonary hypertension, primary	0	0	28	4	0	0	0	7	2	0	10	0	0	1	119	1	0	0	0	34	0	0	11	0	0	0	7	2	2	0	1	1	0	135	17	18	148	8
PS187300	Telangiectasia, hereditary hemorrhagic	0	0	15	0	0	0	0	1	0	0	7	0	0	0	17	2	0	0	0	2	0	1	1	0	0	0	15	0	0	0	0	0	0	1	0	0	14	11
236500	Multinucleated Neurons, Anhydramnios, Renal Dysplasia, Cerebellar Hypoplasia, And Hydranencephaly	0	0	0	0	0	0	0	0	0	0	0	0	0	0	0	0	0	0	0	0	0	0	0	0	0	0	0	0	0	0	0	0	0	0	0	0	0	0
230800	Gaucher Disease, Type I	0	0	3	2	3	1	0	0	0	0	1	6	0	4	0	0	2	3	0	0	7	1	0	2	0	2	2	6	5	0	0	0	0	0	0	0	0	0
PS212066	Congenital disorders of glycosylation, type II	0	0	0	0	0	0	0	0	0	0	0	0	0	0	0	0	0	0	0	0	0	0	0	0	0	0	0	0	0	0	0	0	0	0	0	0	0	0
602450	Severe Combined Immunodeficiency With Sensitivity To Ionizing Radiation	0	0	0	0	0	0	0	0	0	0	0	0	0	0	0	0	0	0	0	0	0	0	0	0	0	0	0	0	0	0	0	0	0	0	0	0	0	0
PS256520	Neu-Laxova syndrome	0	0	0	0	0	0	0	0	0	0	0	0	0	0	0	0	0	0	0	0	0	0	0	0	0	0	0	0	0	0	0	0	0	0	0	0	0	0
PS300755	Immunodeficiency (Select Examples)	1	2	1	0	1	0	0	0	0	0	0	0	0	0	0	0	0	0	1	0	0	0	0	0	0	0	1	0	0	1	1	1	0	0	0	0	0	0
PS254090	Ullrich congenital muscular dystrophy	0	0	1	0	0	0	0	0	0	0	0	0	0	0	0	0	0	0	0	0	0	0	1	0	0	0	1	0	0	0	0	0	0	0	0	0	0	0
PS308240	Lymphoproliferative syndrome	6	8	0	0	26	0	0	0	0	0	0	1	2	1	0	0	0	0	0	0	0	1	0	1	19	0	0	15	2	0	0	0	0	0	0	0	0	0
PS245480	Specific granule deficiency	0	0	0	0	0	0	0	0	0	0	0	0	0	0	0	0	0	1	0	0	0	0	0	12	0	0	0	0	0	0	0	0	0	0	0	0	0	0
PS256100	Nephronophthisis	0	0	0	0	0	6	0	0	0	0	0	0	1	0	0	0	0	0	1	0	0	0	0	0	0	0	0	0	0	0	0	0	0	0	0	0	0	0
608022	Diaphanospondylodysostosis	0	0	0	0	0	0	0	0	0	0	0	0	0	0	0	0	0	0	0	0	0	0	0	0	0	0	0	0	0	0	0	0	0	0	0	0	0	0
242840	Immunodeficiency With Cleft Lip/palate, Cataract, Hypopigmentation,and Absent Corpus Callosum	0	0	0	0	0	0	0	0	0	0	0	0	0	0	0	0	0	0	0	0	0	0	0	0	0	0	0	0	0	0	0	0	0	0	0	0	0	0
603554	Omenn Syndrome	15	20	5	2	28	3	1	0	0	0	7	5	3	11	4	2	4	5	0	0	3	4	5	2	44	0	5	17	9	0	1	5	0	4	1	1	0	6
616897	Osteochondrodysplasia, Complex Lethal, Symoens-barnes-gistelinck Type	0	0	0	0	0	0	0	0	0	0	0	0	0	0	0	0	0	0	0	0	0	0	0	0	0	0	0	0	0	0	0	0	0	0	0	0	0	0
PS601462	Myasthenic syndrome, congenital	0	0	0	0	0	1	0	0	0	0	0	0	0	0	0	0	0	0	0	0	0	0	0	0	0	0	0	0	0	0	0	0	0	0	0	0	0	0
604173	Poikiloderma With Neutropenia	0	0	0	0	0	0	0	0	0	0	0	0	0	0	0	0	0	0	0	0	0	0	0	0	0	0	0	0	0	0	0	0	0	0	0	0	0	0
265000	Multiple Pterygium Syndrome, Escobar Variant	0	0	0	0	0	0	0	0	0	0	0	0	0	0	0	0	0	0	0	0	0	0	0	0	0	0	0	0	0	0	0	0	0	0	0	0	0	0
245150	Keutel Syndrome	0	0	0	0	0	0	0	0	0	0	0	0	0	0	0	0	0	0	0	0	0	0	0	0	0	0	0	0	0	0	0	0	0	0	0	0	0	0
617321	Yao Syndrome	0	1	0	3	1	0	0	0	0	0	3	0	1	1	2	0	0	2	2	2	0	0	1	0	0	0	0	2	2	0	0	0	0	0	14	14	1	0
PS151623	Li-Fraumeni syndrome	0	0	0	0	0	0	0	0	0	0	0	0	0	0	0	0	4	0	0	0	0	1	0	0	0	0	0	0	0	0	0	0	0	0	0	0	0	0
241500	Hypophosphatasia, Infantile	0	0	0	0	0	0	0	0	0	0	0	0	0	0	0	0	0	0	0	0	0	0	0	0	0	0	0	0	0	0	0	0	0	0	0	0	0	0
146510	Pallister-hall Syndrome 1	0	0	0	0	0	0	1	0	0	0	0	0	0	0	0	0	0	0	0	0	0	0	0	0	0	0	0	0	0	0	0	0	0	0	0	0	0	0
PS127550	Dyskeratosis congenita	0	0	0	0	0	2	0	0	0	0	0	0	0	0	0	0	1	0	0	0	0	0	0	0	0	0	0	0	0	0	0	0	0	0	1	1	0	0
253290	Multiple Pterygium Syndrome, Lethal Type	0	0	0	0	0	0	0	0	0	0	0	0	0	0	0	0	0	0	0	0	0	0	0	0	0	0	0	0	0	0	0	0	0	0	0	0	0	0
PS224690	Meier-Gorlin syndrome	0	0	0	0	0	0	0	0	0	0	0	0	0	0	0	0	0	0	0	0	0	0	0	0	0	0	0	0	0	0	0	0	0	0	0	0	0	0
PS262400	Isolated growth hormone deficiency	0	0	0	0	1	0	0	0	0	0	0	0	0	0	0	0	1	0	0	0	0	0	1	1	0	0	0	0	0	0	0	0	0	0	0	0	0	0
PS134600	Fanconi renotubular syndrome	0	0	0	1	1	1	0	0	0	0	0	1	1	0	0	0	3	1	0	0	0	0	0	1	2	0	0	13	0	0	0	0	0	0	0	0	0	0
PS130000	Ehlers-Danlos syndrome	0	0	2	3	0	0	0	0	0	0	0	1	0	0	0	0	2	0	0	0	0	0	8	0	0	0	0	1	0	0	0	0	0	0	0	0	3	0
PS191830	Renal hypodysplasia/aplasia	0	0	0	0	0	0	0	0	0	0	0	0	0	0	0	0	0	0	0	0	0	0	0	0	0	0	0	0	0	0	0	0	0	0	0	0	0	0
173600	Pneumothorax, Primary Spontaneous	0	0	0	3	0	0	0	0	0	0	0	0	0	0	0	0	0	0	0	0	0	13	1	0	0	0	0	0	0	0	0	1	0	0	4	5	0	0
618280	Cardiac-urogenital Syndrome	0	0	0	0	0	0	0	0	0	0	0	0	0	0	0	0	0	0	0	0	0	0	0	0	0	0	0	0	0	0	0	0	0	0	0	0	0	0
248700	Marden-walker Syndrome	0	0	0	0	0	0	0	0	0	0	0	0	0	0	0	0	0	0	0	0	0	0	0	0	0	0	0	0	0	0	0	0	0	0	0	0	0	0
PS226400	Epidermodysplasia verruciformis, susceptibility to	0	0	0	0	0	0	0	0	0	0	0	0	0	0	0	0	0	0	0	0	0	0	0	0	1	0	0	0	0	0	0	0	0	0	0	0	0	0
617241	Lung Disease, Immunodeficiency, And Chromosome Breakage Syndrome	0	0	0	0	0	0	0	0	0	0	0	0	0	0	0	0	0	0	0	0	0	0	0	0	0	0	0	0	0	0	0	0	0	0	0	0	0	0
PS613658	Rajab interstitial lung disease with brain calcifications	0	0	0	0	0	0	0	0	0	0	0	0	0	0	0	0	0	0	0	0	0	0	0	0	0	0	0	0	0	0	0	0	0	0	0	0	0	0
217090	Plasminogen Deficiency, Type Iligneous Conjunctivitis, Included	0	0	0	0	0	0	0	0	0	0	0	0	0	0	0	0	0	0	0	0	0	0	0	0	0	0	0	0	0	0	0	0	0	0	0	0	0	0
265380	Alveolar Capillary Dysplasia With Misalignment Of Pulmonary Veins	0	0	3	10	0	0	0	0	0	0	5	0	0	0	7	1	0	0	0	2	0	0	1	0	0	0	1	0	0	0	0	0	0	5	5	4	7	0
193300	Von Hippel-lindau Syndrome	0	0	12	0	0	0	1	1	0	0	0	0	1	0	2	1	0	0	1	0	0	1	1	1	1	0	15	0	0	0	0	0	0	0	0	0	2	0
211980	Lung Cancer, Susceptibility To	1	0	2	10	0	2	1	1	0	0	2	5	10	1	5	1	8	2	16	5	5	27	7	3	27	1	3	1	2	2	2	6	0	1	48	49	4	2
611812	46,xx Sex Reversal With Dysgenesis Of Kidneys, Adrenals, And Lungs	0	0	0	0	0	0	0	0	0	0	0	0	0	0	0	0	0	0	0	0	0	0	0	0	0	0	0	0	0	0	0	0	0	0	0	0	0	0
PS601419	Myopathy, myofibrillar	0	0	0	0	0	0	0	0	0	0	0	0	0	0	0	0	0	0	0	0	0	0	1	0	0	0	0	0	0	0	0	0	0	0	0	0	1	0
618316	Intellectual Developmental Disorder With Cardiac Defects And Dysmorphic Facies	0	0	0	0	0	0	0	0	0	0	0	0	1	0	0	0	0	0	0	0	0	0	0	0	0	0	0	0	0	0	0	0	0	0	0	0	0	0
PS610551	Encephalopathy, acute, infection-induced	0	0	0	0	0	0	0	0	0	0	1	0	0	0	0	0	0	0	0	0	0	0	0	0	0	0	0	0	0	0	0	0	0	0	0	0	0	0
301220	Pigmentary Disorder, Reticulate, With Systemic Manifestations, X-linked	0	0	0	0	0	0	0	0	0	0	0	0	0	0	0	0	0	0	0	0	0	0	0	0	0	0	0	0	0	0	0	0	0	0	0	0	0	0

## Sheet: Skeletal muscle
Supplementary File 3C. Names of disease and cell type co-appearance in PubMed records in skeletal muscle.
Disease\Phenotypic series accession (OMIM)	Disease\Phenotypic series name	capillary endothelial cell	cd4-positive, alpha-beta t cell	cd8-positive, alpha-beta t cell	endothelial cell of artery	endothelial cell of lymphatic vessel	endothelial cell of vascular tree	erythrocyte	fast muscle cell	macrophage	mast cell	mature nk t cell	mesenchymal stem cell	mesothelial cell	pericyte cell	skeletal muscle satellite stem cell	slow muscle cell	smooth muscle cell	t cell	tendon cell
617982	Ververi-brady Syndrome	0	0	0	0	0	0	0	0	0	0	0	0	0	0	0	0	0	0	0
248510	Mannosidosis, Beta A, Lysosomal	0	0	0	0	0	0	0	0	0	0	0	0	1	0	0	0	0	0	0
618906	Intellectual Developmental Disorder With Autistic Features And Language Delay, With Or Without Seizures	0	0	0	0	0	0	0	0	0	0	0	0	0	0	0	0	0	0	0
PS180860	Silver-Russell syndrome	0	0	0	0	0	0	0	0	0	0	0	0	0	0	0	0	0	0	0
160800	Myotonia Congenita, Autosomal Dominant	0	0	0	0	0	0	3	31	0	0	0	0	0	0	2	29	0	0	0
609628	Majeed Syndrome	0	0	0	0	0	0	0	0	0	0	0	0	0	0	0	0	0	0	0
617235	Myoclonus, Intractable, Neonatal	0	0	0	0	0	0	0	0	0	0	0	0	0	0	0	0	0	0	0
PS146200	Hypoparathyroidism, familial	0	3	1	0	0	0	0	0	0	0	0	0	0	0	0	0	0	1	0
PS210200	Methylcrotonylglycinuria	0	0	0	0	0	0	0	0	0	0	0	0	0	0	0	0	0	0	0
618512	O'donnell-luria-rodan Syndrome	0	0	0	0	0	0	0	0	0	0	0	0	0	0	0	0	0	0	0
PS614675	Bone marrow failure syndrome	0	2	2	0	0	0	4	0	0	2	0	6	0	0	0	0	0	5	0
616831	Luscan-lumish Syndrome	0	0	0	0	0	0	0	0	0	0	0	0	0	0	0	0	0	0	0
618829	Nabais Sa-de Vries Syndrome, Type 2	0	0	0	0	0	0	0	0	0	0	0	0	0	0	0	0	0	0	0
617802	Neurodevelopmental Disorder With Microcephaly, Seizures, And Cortical Atrophy	0	0	0	0	0	0	0	0	0	0	0	0	0	0	0	0	0	0	0
616657	Spastic Tetraplegia, Thin Corpus Callosum, And Progressive Microcephaly	0	0	0	0	0	0	0	0	0	0	0	0	0	0	0	0	0	0	0
617915	Hypotonia, Ataxia, Developmental Delay, And Tooth Enamel Defect Syndrome	0	0	0	0	0	0	0	0	0	0	0	0	0	0	0	0	0	0	0
PS613135	Parkinsonism-dystonia, infantile	0	0	0	0	0	0	0	0	0	0	0	0	0	0	0	0	0	0	0
PS254800	Epilepsy, progressive myoclonic	0	0	0	0	0	0	0	1	0	0	0	0	0	0	0	1	0	0	1
151050	Lenz-majewski Hyperostotic Dwarfism	0	0	0	0	0	0	0	0	0	0	0	0	0	0	0	0	0	0	0
PS213200	Spinocerebellar ataxia, autosomal recessive	0	0	0	0	0	0	0	0	0	0	0	0	0	0	0	0	0	1	1
253260	Biotinidase Deficiencymultiple Carboxylase Deficiency, Late-onset	0	0	0	0	0	0	0	0	0	0	0	0	0	0	0	0	0	0	0
603896	Leukoencephalopathy With Vanishing White Matter	0	0	0	0	0	0	0	0	0	1	0	2	0	5	0	0	0	0	0
301500	Fabry Disease	2	1	0	5	3	0	1	1	0	0	0	0	0	14	0	5	0	0	0
PS251200	Microcephaly, primary autosomal recessive	0	0	0	0	0	0	0	0	0	0	0	0	0	0	0	0	0	0	0
617595	Birk-landau-perez Syndrome	0	0	0	0	0	0	0	0	0	0	0	0	0	0	0	0	0	0	0
PS615419	Hypotonia, infantile, with psychomotor retardation and characteristic facies	0	0	0	0	0	0	0	0	0	0	0	0	0	0	0	0	0	0	0
142680	Periodic Fever, Familial, Autosomal Dominant	0	0	0	0	0	0	0	0	0	0	0	0	0	0	0	0	0	0	0
618619	Weiss-kruszka Syndrome	0	0	0	0	0	0	0	0	0	0	0	0	0	0	0	0	0	0	0
112250	Diaphyseal Medullary Stenosis With Malignant Fibrous Histiocytoma	0	0	0	0	0	0	0	0	0	0	0	0	0	0	0	0	0	0	0
218000	Agenesis Of The Corpus Callosum With Peripheral Neuropathy	0	0	0	0	0	0	0	0	0	0	0	0	0	0	0	0	0	0	0
227600	Factor X Deficiency	0	0	0	0	0	0	0	0	0	0	0	0	0	0	0	0	0	0	0
300718	Myopathy, Reducing Body, X-linked, Childhood-onset	0	0	0	0	0	0	0	0	0	0	0	0	0	0	0	0	0	0	0
PS609308	Muscular dystrophy-dystroglycanopathy, type C	0	0	0	0	0	0	0	0	0	0	0	0	0	0	1	0	0	0	0
601200	Pleuropulmonary Blastoma	0	0	0	0	0	0	0	0	0	0	0	0	1	0	0	0	0	0	0
PS601675	Trichothiodystrophy	0	0	0	0	0	0	0	0	0	0	0	0	0	0	0	0	0	0	0
PS116200	Cataract	1	0	0	0	0	0	1	0	0	0	0	0	1	0	0	0	0	0	0
616263	Neurologic, Endocrine, And Pancreatic Disease, Multisystem, Infantile-onset	0	0	0	0	0	0	0	0	0	0	0	0	0	0	0	0	0	0	0
PS309800	Microphthalmia, syndromic	0	0	0	0	0	0	0	0	0	0	0	0	0	0	0	0	0	0	0
263210	Gillessen-kaesbach-nishimura Syndrome	0	0	0	0	0	0	0	0	0	0	0	0	0	0	0	0	0	0	0
619121	Neurodevelopmental Disorder With Cardiomyopathy, Spasticity, And Brain Abnormalities	0	0	0	0	0	0	0	0	0	0	0	0	0	0	0	0	0	0	0
617435	Lopes-maciel-rodan Syndrome	0	0	0	0	0	0	0	0	0	0	0	0	0	0	0	0	0	0	0
180800	Roussy-levy Hereditary Areflexic Dystasia	0	0	0	0	0	0	0	3	0	0	0	1	0	1	1	6	0	0	4
201475	Acyl-coa Dehydrogenase, Very Long-chain, Deficiency Of	0	0	0	0	0	0	0	2	0	0	0	0	0	0	0	1	0	0	0
605820	Nonaka Myopathy	0	0	0	0	0	0	0	0	0	0	0	0	0	0	0	2	0	0	1
614261	Microcephaly-capillary Malformation Syndrome	0	0	0	0	0	0	0	0	0	0	0	0	0	0	0	0	0	0	0
PS115150	Cardiofaciocutaneous syndrome	0	0	0	0	0	0	0	0	0	0	0	0	0	0	0	0	0	0	0
PS268310	Robinow syndrome	0	0	0	0	1	0	0	0	0	0	0	0	0	0	0	0	0	0	0
616878	Metabolic Encephalomyopathic Crises, Recurrent, With Rhabdomyolysis, Cardiac Arrhythmias, And Neurodegeneration	0	0	0	0	0	0	0	0	0	0	0	0	0	0	0	0	0	0	0
602398	Desmosterolosis	0	0	0	0	0	0	0	0	0	0	0	0	0	0	0	0	0	0	0
PS145000	Hyperparathyroidism	0	0	0	0	0	0	0	0	0	1	0	0	0	0	0	0	0	1	0
162100	Amyotrophy, Hereditary Neuralgic	0	0	0	0	0	0	0	0	0	0	0	0	0	0	0	0	0	0	0
PS300345	Microphthalmia, isolated, with coloboma	0	0	0	0	0	0	0	0	0	0	0	0	0	0	0	0	0	0	0
226750	Kohlschutter-tonz Syndrome	0	0	0	0	0	0	0	0	0	0	0	0	0	0	0	0	0	0	0
614501	Psychomotor Retardation, Epilepsy, And Craniofacial Dysmorphism	0	0	0	0	0	0	0	0	0	0	0	0	0	0	0	0	0	0	0
618087	Spinocerebellar Ataxia 42, Early-onset, Severe, With Neurodevelopmental Deficits	0	0	0	0	0	0	0	0	0	0	0	0	0	0	0	0	0	0	0
614482	Congenital Cataracts, Hearing Loss, And Neurodegeneration	0	0	0	0	0	0	0	0	0	0	0	0	0	0	0	0	0	0	0
PS116860	Cerebral cavernous malformations	11	0	0	7	3	0	0	0	0	0	0	0	0	14	0	0	0	0	0
PS604273	Mitochondrial complex V (ATP synthase) deficiency, nuclear type	0	0	0	0	0	0	0	0	0	0	0	0	0	0	0	0	0	0	0
PS610542	Myasthenic syndrome, congenital, with tubular aggregates	0	0	0	0	0	0	0	0	0	0	0	0	0	0	0	0	0	0	0
604168	Congenital Cataracts, Facial Dysmorphism, And Neuropathy	0	0	0	0	0	0	0	0	0	0	0	0	0	0	0	0	0	0	0
617807	Neurodevelopmental Disorder With Ataxic Gait, Absent Speech, And Decreased Cortical White Matter	0	0	0	0	0	0	0	0	0	0	0	0	0	0	0	0	0	0	0
PS269500	Sclerosteosis	0	0	0	0	0	0	0	0	0	0	0	0	0	0	0	0	0	0	0
253300	Spinal Muscular Atrophy, Type I	0	0	0	0	0	0	0	3	0	0	0	0	0	1	0	2	0	0	0
618363	Short Stature, Amelogenesis Imperfecta, And Skeletal Dysplasia With Scoliosis	0	0	0	0	0	0	0	0	0	0	0	0	0	0	0	0	0	0	0
231670	Glutaric Acidemia I	0	0	0	0	0	0	0	0	0	0	0	0	0	2	0	0	0	0	0
618760	Neurodevelopmental Disorder With Hypotonia And Autistic Features With Or Without Hyperkinetic Movements	0	0	0	0	0	0	0	0	0	0	0	0	0	0	0	0	0	0	0
618142	Microcephaly, Facial Dysmorphism, Renal Agenesis, And Ambiguous Genitalia Syndrome	0	0	0	0	0	0	0	0	0	0	0	0	0	0	0	0	0	0	0
607641	Neuronopathy, Distal Hereditary Motor, Type Viib	0	0	0	0	0	0	0	0	0	0	0	0	0	0	0	0	0	0	0
608836	Carnitine Palmitoyltransferase Ii Deficiency, Lethal Neonatal	0	0	0	0	0	0	0	0	0	0	0	0	0	0	0	0	0	0	0
610015	Glutamine Deficiency, Congenital	0	0	0	0	0	0	0	0	0	0	0	0	0	0	0	0	0	0	0
611722	Krabbe Disease, Atypical, Due To Saposin A Deficiency	0	0	0	0	0	0	0	0	0	0	0	0	0	0	0	0	0	0	0
PS147920	Kabuki syndrome	0	0	0	0	0	0	0	0	0	0	0	0	0	0	0	0	0	0	0
617044	Short Stature, Developmental Delay, And Congenital Heart Defects	0	0	0	0	0	0	0	0	0	0	0	0	0	0	0	0	0	0	0
301830	Spinal Muscular Atrophy, X-linked 2	0	0	0	0	0	0	0	0	0	0	0	0	0	0	0	0	0	0	0
211750	C Syndrome	1	0	1	1	2	0	1	1	0	3	0	1	0	1	0	3	1	0	1
PS214100	Peroxisome biogenesis disorder	0	0	0	2	0	0	0	10	0	0	0	0	0	0	0	10	3	0	0
618089	Intellectual Developmental Disorder With Dysmorphic Facies And Behavioral Abnormalities	0	0	0	0	0	0	0	0	0	0	0	0	0	0	0	0	0	0	0
610377	Mevalonic Aciduria	0	0	0	1	0	0	0	0	0	0	0	0	0	0	0	0	0	0	0
PS124000	Mitochondrial complex III deficiency, nuclear type	0	0	0	0	0	0	0	0	0	0	0	0	0	0	0	0	0	0	0
PS256040	Proteosome-associated autoinflammatory syndrome	0	0	0	0	0	0	0	0	0	0	0	0	0	0	0	0	0	0	0
PS145980	Hypocalciuric hypercalcemia	0	0	0	0	0	0	0	0	0	0	0	0	0	0	0	0	0	0	0
610006	2-@methylbutyryl-coa Dehydrogenase Deficiency	0	0	0	0	0	0	0	0	0	0	0	0	0	0	0	0	0	0	0
608358	Myopathy, Myosin Storage	0	0	0	0	0	0	0	0	0	0	0	0	0	0	0	2	0	0	0
251260	Nijmegen Breakage Syndrome	0	1	1	0	0	0	0	0	0	0	0	0	0	0	0	0	1	1	0
300842	Mcleod Syndrome	0	0	0	0	0	0	1	0	0	0	0	0	0	0	0	0	0	0	0
618162	Spondyloepimetaphyseal Dysplasia, Krakow Type	0	0	0	0	0	0	0	0	0	0	0	0	0	0	0	0	0	0	0
214800	Charge Syndrome	0	0	0	0	0	0	2	0	0	0	0	0	0	0	0	0	0	0	0
619080	Kilquist Syndrome	0	0	0	0	0	0	0	0	0	0	0	0	0	0	0	0	0	0	0
PS147060	Hyper-IgE recurrent infection syndrome	0	0	0	0	0	0	0	0	0	0	0	0	0	0	0	0	0	1	0
606353	Primary Lateral Sclerosis, Juvenile	0	0	0	0	0	0	0	0	0	0	0	0	0	0	0	0	0	0	0
617183	Harel-yoon Syndrome	0	0	0	0	0	0	0	0	0	0	0	0	0	0	0	0	0	0	0
PS128100	Dystonia	0	0	0	0	0	0	0	2	0	0	0	0	0	0	0	2	0	0	2
618060	Intellectual Developmental Disorder With Or Without Epilepsy Or Cerebellar Ataxia	0	0	0	0	0	0	0	0	0	0	0	0	0	0	0	0	0	0	0
617709	Neurodevelopmental Disorder With Microcephaly, Ataxia, And Seizures	0	0	0	0	0	0	0	0	0	0	0	0	0	0	0	0	0	0	0
PS603511	Muscular dystrophy, limb-girdle, autosomal dominant	0	0	0	0	0	0	0	0	0	0	0	0	0	0	4	2	0	0	0
186580	Blau Syndrome	0	0	0	0	0	0	0	0	0	0	0	0	0	0	0	0	0	0	1
PS242860	Immunodeficiency-centromeric instability-facial anomalies	0	0	0	0	0	0	0	0	0	0	0	0	0	0	0	0	0	0	0
114290	Campomelic Dysplasia	0	0	0	0	0	0	0	0	0	0	0	0	0	0	0	0	1	0	0
611881	Glycogen Storage Disease Xii	0	0	0	0	0	0	0	0	0	0	0	0	0	0	0	0	0	0	0
PS617186	Encephalopathy, progressive, early-onset, with brain edema and/or leukoencephalopathy	0	2	0	0	0	0	0	0	0	1	0	0	0	5	0	0	0	0	0
617913	Neurodevelopmental Disorder With Microcephaly, Cataracts, And Renal Abnormalities	0	0	0	0	0	0	0	0	0	0	0	0	0	0	0	0	0	0	0
PS192600	Cardiomyopathy, familial hypertrophic	0	0	0	0	0	0	0	9	0	0	0	0	0	0	1	15	0	0	0
259775	Raine Syndrome	0	0	0	0	0	0	0	0	0	0	0	0	0	0	0	0	0	0	0
615673	Myopathy With Extrapyramidal Signs	0	0	0	0	0	0	0	0	0	0	0	0	0	0	0	0	0	0	0
607625	Niemann-pick Disease, Type C2	0	0	0	0	0	0	0	0	0	0	0	0	0	0	0	0	0	0	0
105120	Amyloidosis V	0	0	0	0	0	0	0	0	0	0	0	0	0	0	0	0	0	0	0
613076	Myopathy, Mitochondrial Progressive, With Congenital Cataract, Hearing Loss, And Developmental Delay	0	0	0	0	0	0	0	0	0	0	0	0	0	0	0	0	0	0	0
616789	Mental Retardation And Distinctive Facial Features With Or Without Cardiac Defects	0	0	0	0	0	0	0	0	0	0	0	0	0	0	0	0	0	0	0
617864	Neurodevelopmental Disorder With Or Without Seizures And Gait Abnormalities	0	0	0	0	0	0	0	0	0	0	0	0	0	0	0	0	0	0	0
618331	Encephalopathy, Progressive, Early-onset, With Episodic Rhabdomyolysis	0	0	0	0	0	0	0	0	0	0	0	0	0	0	0	0	0	0	0
PS143880	Hypercalcemia, infantile	0	0	0	0	0	0	0	0	0	0	0	0	0	0	0	0	0	0	0
616007	Cataracts, Growth Hormone Deficiency, Sensory Neuropathy, Sensorineural Hearing Loss, And Skeletal Dysplasia	0	0	0	0	0	0	0	0	0	0	0	0	0	0	0	0	0	0	0
607855	Muscular Dystrophy, Congenital Merosin-deficient, 1a	0	0	0	0	0	0	0	0	0	0	0	0	0	0	1	0	0	0	0
617710	Neurodevelopmental Disorder, Mitochondrial, With Abnormal Movements And Lactic Acidosis, With Or Without Seizures	0	0	0	0	0	0	0	0	0	0	0	0	0	0	0	0	0	0	0
618604	Snijders Blok-fisher Syndrome	0	0	0	0	0	0	0	0	0	0	0	0	0	0	0	0	0	0	0
615879	Tatton-brown-rahman Syndrome	0	0	0	0	0	0	0	0	0	0	0	0	0	0	0	0	0	0	0
PS135500	Zimmermann-Laband syndrome	0	0	0	0	0	0	0	0	0	0	0	0	0	0	0	0	0	0	0
207800	Argininemia	0	0	0	1	0	0	0	0	0	0	0	0	0	0	0	0	0	0	0
220500	Doors Syndrome	0	0	0	0	0	0	0	0	0	0	0	0	0	0	0	0	0	0	0
PS300049	Periventricular nodular heterotopia	0	0	0	0	0	0	0	0	0	0	0	0	0	0	0	0	0	0	0
617303	Mucopolysaccharidosis-plus Syndrome	0	0	0	0	0	0	0	0	0	0	0	0	0	0	0	0	0	0	0
618384	Leukoencephalopathy, Acute Reversible, With Increased Urinary Alpha-ketoglutarate	0	0	0	0	0	0	0	0	0	0	0	0	0	0	0	0	0	0	0
609924	Aminoacylase 1 Deficiency	0	0	0	0	0	0	0	0	0	0	0	0	0	0	0	0	0	0	0
188400	Digeorge Syndrome	0	4	3	0	3	0	0	0	0	1	2	0	0	0	0	0	1	5	0
PS123700	Cutis laxa	0	0	0	0	0	0	0	0	0	0	0	0	0	0	0	0	0	0	3
PS239300	Hyperphosphatasia with mental retardation syndrome	0	0	0	0	0	0	0	0	0	0	0	0	0	0	0	0	0	0	0
608688	Aicar Transformylase/imp Cyclohydrolase, Deficiency Of	0	0	0	0	0	0	0	0	0	0	0	0	0	0	0	0	0	0	0
609541	Spastic Paraplegia, Optic Atrophy, And Neuropathy	0	0	0	0	0	0	0	0	0	0	0	0	0	0	0	0	0	0	0
252500	Mucolipidosis Ii Alpha/beta	0	0	0	0	0	0	0	1	0	0	0	0	1	2	0	0	1	0	1
617158	Myopathy, Distal, With Rimmed Vacuoles	0	0	0	0	0	0	0	0	0	0	0	0	0	0	1	1	0	0	0
618330	Global Developmental Delay With Or Without Impaired Intellectual Development	0	0	0	0	0	0	0	0	0	0	0	0	0	0	0	0	0	0	0
223800	Dyggve-melchior-clausen Disease	0	0	0	0	0	0	0	0	0	0	0	0	0	0	0	0	0	0	0
274270	Dihydropyrimidine Dehydrogenase Deficiency	0	0	0	0	0	0	0	0	0	0	0	0	0	0	0	0	0	0	0
617752	Mental Retardation, Autosomal Dominant 49	0	0	0	0	0	0	0	0	0	0	0	0	0	0	0	0	0	0	0
613179	Immunodeficiency Due To Purine Nucleoside Phosphorylase Deficiency	0	0	0	0	0	0	0	0	0	0	1	0	0	0	0	0	0	0	0
231680	Multiple Acyl-coa Dehydrogenase Deficiency	0	0	0	0	0	0	0	0	0	0	0	0	0	0	0	0	0	0	0
PS303350	Spastic paraplegia	0	0	0	0	0	0	0	2	0	0	0	2	0	1	1	4	0	0	1
PS242300	Ichthyosis, congenital, autosomal recessive	0	0	0	0	0	0	0	0	0	0	0	0	0	0	0	0	0	0	0
PS203300	Hermansky-Pudlak syndrome	1	0	0	0	0	0	0	0	0	0	1	0	0	0	0	0	0	0	0
606054	Propionic Acidemia	0	0	0	0	0	0	0	0	0	0	0	0	0	0	0	0	0	0	0
618975	Myopathy, Congenital, With Diaphragmatic Defects, Respiratory Insufficiency, And Dysmorphic Facies	0	0	0	0	0	0	0	0	0	0	0	0	0	0	1	0	0	0	0
617412	Macinnes Syndrome	0	0	0	0	0	0	0	0	0	0	0	0	0	0	0	0	0	0	0
614105	Methylmalonate Semialdehyde Dehydrogenase Deficiency	0	0	0	0	0	0	0	0	0	0	0	0	0	0	0	0	0	0	0
231550	Achalasia-addisonianism-alacrima Syndrome	0	0	0	0	0	0	0	0	0	0	0	0	0	0	0	0	0	0	0
618875	Seizures, Early-onset, With Neurodegeneration And Brain Calcification	0	0	0	0	0	0	0	0	0	0	0	0	0	0	0	0	0	0	0
266150	Pyruvate Carboxylase Deficiency	0	0	0	0	0	0	0	0	0	0	0	0	0	0	0	0	0	0	0
PS249270	Thiamine-responsive dysfunction syndrome	0	0	0	0	0	0	0	0	0	0	0	0	0	0	0	0	0	0	0
268800	Sandhoff Disease	1	0	0	1	0	0	0	0	0	0	1	0	0	2	0	1	0	0	0
PS234200	Neurodegeneration with brain iron accumulation	0	0	0	0	0	0	0	0	0	0	0	1	0	0	0	0	0	0	0
PS145600	Malignant hyperthermia	1	0	0	0	0	0	1	13	0	0	0	1	5	0	1	11	2	0	1
616920	Heart And Brain Malformation Syndrome	0	0	0	1	0	0	0	2	0	0	0	0	0	1	0	3	0	0	0
617481	Neurodevelopmental Disorder With Microcephaly, Hypotonia, And Variable Brain Anomalies	0	0	0	0	0	0	0	0	0	0	0	0	0	0	0	0	0	0	0
264700	Vitamin D-dependent Rickets, Type I	0	0	0	0	0	0	0	0	0	0	0	0	0	0	0	0	0	0	1
PS607432	Lissencephaly	0	0	0	0	0	0	0	0	0	0	0	0	0	1	1	0	0	0	0
616084	Sideroblastic Anemia With B-cell Immunodeficiency, Periodic Fevers, And Developmental Delay	0	0	0	0	0	0	0	0	0	0	0	0	0	0	0	0	0	0	0
614262	Arthrogryposis, Perthes Disease, And Upward Gaze Palsy	0	0	0	0	0	0	0	0	0	0	0	0	0	0	0	0	0	0	0
180295	Rhabdomyosarcoma, Embryonal, 2	0	0	0	0	0	0	0	2	0	0	0	0	1	0	5	0	0	0	0
236250	Homocystinuria Due To Deficiency Of N(5,10)-methylenetetrahydrofolatereductase Activity	0	0	0	0	0	0	0	0	0	0	0	0	0	0	0	0	0	0	0
255125	Myopathy With Exercise Intolerance, Swedish Type	0	0	0	0	0	0	0	0	0	0	0	0	0	0	0	1	0	0	0
600001	Pancreatic Agenesis And Congenital Heart Defects	0	0	0	0	0	0	0	0	0	0	0	0	0	0	0	0	0	0	0
PS148210	Keratitis-ichthyosis-deafness syndrome	0	0	0	0	0	0	0	0	0	0	0	0	0	0	0	0	0	0	0
617516	Stankiewicz-isidor Syndrome	0	0	0	0	0	0	0	0	0	0	0	0	0	0	0	0	0	0	0
159950	Spinal Muscular Atrophy With Progressive Myoclonic Epilepsy	0	0	0	0	0	0	0	0	0	0	0	0	0	0	0	0	0	0	0
618156	Squalene Synthase Deficiency	0	0	0	0	0	0	0	0	0	0	0	0	0	0	0	0	0	0	0
618707	Neurodevelopmental Disorder With Absent Language And Variable Seizures	0	0	0	0	0	0	0	0	0	0	0	0	0	0	0	0	0	0	0
604320	Spinal Muscular Atrophy, Distal, Autosomal Recessive, 1	0	0	0	0	0	0	0	0	0	0	0	0	0	0	0	0	0	0	0
618276	Neurodegeneration, Childhood-onset, With Cerebellar Atrophy	0	0	0	0	0	0	0	0	0	0	0	0	0	0	0	0	0	0	0
PS253310	Lethal congenital contracture syndrome	0	0	0	0	0	0	0	0	0	0	0	0	0	0	1	2	0	0	0
183900	Spondyloepiphyseal Dysplasia Congenita	0	0	0	0	0	0	0	0	0	0	0	0	0	0	0	0	0	0	0
611816	Temple-baraitser Syndrome	0	0	0	0	0	0	0	0	0	0	0	0	0	0	0	0	0	0	0
169500	Leukodystrophy, Adult-onset, Autosomal Dominant	0	0	0	0	0	0	0	0	0	0	0	0	0	0	0	0	0	0	0
PS158810	Bethlem myopathy	0	0	0	0	0	0	0	0	0	0	0	0	0	1	1	1	0	0	2
122860	Craniodiaphyseal Dysplasia, Autosomal Dominant	0	0	0	0	0	0	0	0	0	0	0	0	0	0	0	0	0	0	0
254940	Carey-fineman-ziter Syndrome	0	0	0	0	0	0	0	0	0	0	0	0	0	0	2	0	0	0	0
270200	Sjogren-larsson Syndrome	0	0	0	0	0	0	0	0	0	0	0	0	0	0	0	1	0	0	0
158901	Facioscapulohumeral Muscular Dystrophy 2	0	0	0	0	0	0	0	1	0	0	0	0	0	0	3	0	0	0	0
216360	Coach Syndrome	0	0	0	0	0	0	0	0	0	0	0	0	0	0	0	0	0	0	0
PS309530	Mental retardation, nonsyndromic, X-linked	0	0	0	0	0	0	0	0	0	0	0	0	0	0	0	0	0	0	0
304110	Craniofrontonasal Syndrome	0	0	0	0	0	0	0	0	0	0	0	0	0	0	0	0	0	0	0
PS163950	Noonan syndrome	1	0	0	0	2	0	0	0	0	0	0	0	0	0	0	0	1	0	5
607822	Alzheimer Disease 3	0	0	0	0	0	0	0	0	0	0	0	0	0	0	0	0	0	0	0
243605	Stromme Syndrome	0	0	0	0	0	0	0	0	0	0	0	0	0	0	0	0	0	0	0
228600	Fibromatosis, Juvenile Hyaline	0	0	0	0	0	0	0	0	0	0	0	0	0	0	0	0	0	0	0
PS114580	Familial candidiasis	0	0	0	0	0	0	0	0	0	0	0	0	0	0	0	0	0	0	0
618430	Developmental Delay With Variable Intellectual Impairment And Behavioral Abnormalities	0	0	0	0	0	0	0	0	0	0	0	0	0	0	0	0	0	0	0
303600	Coffin-lowry Syndrome	0	0	0	0	0	0	0	0	0	0	0	0	0	0	0	0	0	0	0
PS115200	Dilated cardiomyopathy	0	0	0	1	0	0	0	5	1	1	0	1	1	1	0	8	1	0	0
618572	Neurodevelopmental Disorder With Cerebellar Hypoplasia And Spasticity	0	0	0	0	0	0	0	0	0	0	0	0	0	0	0	0	0	0	0
618786	Imagawa-matsumoto Syndrome	0	0	0	0	0	0	0	0	0	0	0	0	0	0	0	0	0	0	0
PS149400	Hyperekplexia	0	0	0	0	0	0	0	0	0	0	0	0	0	0	0	0	0	0	1
212138	Carnitine-acylcarnitine Translocase Deficiency	0	0	0	0	0	0	0	1	0	0	0	0	0	0	0	0	0	0	0
227500	Factor Vii Deficiency	0	0	0	0	0	0	0	0	0	0	0	0	0	0	0	0	0	0	0
300100	Adrenoleukodystrophy	1	0	0	0	0	0	0	0	0	0	0	0	0	0	0	1	0	0	0
611431	Legius Syndrome	0	0	0	0	0	0	0	0	0	0	0	0	0	0	0	0	0	0	0
618823	Myopathy, Congenital Proximal, With Minicore Lesions	0	0	0	0	0	0	0	0	0	0	0	0	0	0	0	0	0	0	0
PS614388	Encephalopathy due to defective mitochondrial and peroxisomal fission	0	0	0	0	0	0	0	0	0	0	0	0	0	0	0	0	0	0	0
PS252011	Mitochondrial complex II deficiency, nuclear type	0	0	0	0	0	0	0	0	0	0	0	0	0	0	0	0	0	0	0
615625	Spastic Paraplegia 72, Autosomal Recessive	0	0	0	0	0	0	0	0	0	0	0	0	0	0	0	0	0	0	0
PS313900	Thrombocytopenia	0	0	0	0	2	0	1	0	1	1	1	0	1	0	0	0	0	2	0
222700	Lysinuric Protein Intolerance	0	0	0	0	0	0	0	0	0	0	0	0	0	0	0	0	0	0	0
617493	Neurodevelopmental Disorder With Involuntary Movements	0	0	0	0	0	0	0	0	0	0	0	0	0	0	0	1	0	0	1
617093	Growth Retardation, Intellectual Developmental Disorder, Hypotonia, And Hepatopathy	0	0	0	0	0	0	0	0	0	0	0	0	0	0	0	0	0	0	0
164300	Oculopharyngeal Muscular Dystrophy	0	0	0	0	0	0	0	2	0	0	0	0	0	0	4	2	0	0	0
611087	Polyhydramnios, Megalencephaly, And Symptomatic Epilepsy	0	0	0	0	0	0	0	0	0	0	0	0	0	0	0	0	0	0	0
618155	Ophthalmoplegia, External, With Rib And Vertebral Anomalies	0	0	0	0	0	0	0	0	0	0	0	0	0	0	0	0	0	0	0
PS300000	Opitz GBBB syndrome	0	0	0	0	0	0	0	0	0	0	0	0	0	0	0	0	0	0	0
248000	Macrocephaly/megalencephaly Syndrome, Autosomal Recessive	0	0	0	0	0	0	0	0	0	0	0	0	0	0	0	0	0	0	0
617393	Neurodevelopmental Disorder With Epilepsy, Cataracts, Feeding Difficulties, And Delayed Brain Myelination	0	0	0	0	0	0	0	0	0	0	0	0	0	0	0	0	0	0	0
270400	Smith-lemli-opitz Syndrome	0	0	0	0	0	0	0	1	0	0	0	0	0	0	0	1	0	0	0
308300	Incontinentia Pigmenti	0	0	0	0	0	0	0	0	1	0	0	0	0	0	0	0	0	0	0
PS201000	Carpenter syndrome	0	0	0	0	0	0	0	0	0	0	0	0	0	0	0	0	0	0	0
PS252010	Mitochondrial complex I deficiency, nuclear type	0	0	0	0	0	0	0	0	0	0	0	0	0	0	0	0	0	0	0
255110	Carnitine Palmitoyltransferase Ii Deficiency, Late-onset	0	0	0	0	0	0	0	0	0	0	0	0	0	0	0	0	0	0	0
PS249000	Meckel syndrome	0	0	0	0	0	0	0	0	0	0	0	0	0	0	0	0	0	0	0
271980	Succinic Semialdehyde Dehydrogenase Deficiency	0	0	0	0	0	0	0	0	0	0	0	0	0	0	0	0	0	0	0
205400	Tangier Disease	0	0	0	1	0	0	1	1	1	0	0	0	0	4	0	1	0	0	0
PS275200	Hypothyroidism, congenital, nongoitrous	0	0	0	0	0	0	0	0	0	0	0	0	0	0	0	0	0	0	0
232500	Glycogen Storage Disease Iv	0	0	0	0	0	0	0	0	0	0	0	0	0	0	0	0	0	0	0
231530	3-@hydroxyacyl-coa Dehydrogenase Deficiency	0	0	0	0	0	0	0	0	0	0	0	0	0	0	0	0	0	0	0
612300	Hemolytic Anemia, Cd59-mediated, With Or Without Immune-mediated Polyneuropathy	0	0	0	0	0	0	0	0	0	0	0	0	0	0	0	0	0	0	0
156530	Metatropic Dysplasia	0	0	0	0	0	0	0	0	0	0	0	0	0	0	0	0	0	0	0
614231	Microcephaly, Epilepsy, And Diabetes Syndrome	0	0	0	0	0	0	0	0	0	0	0	0	0	0	0	0	0	0	0
PS601198	Hypocalcemia	0	0	0	0	0	0	2	4	0	0	0	0	0	0	0	3	0	0	1
PS252150	Molybdenum cofactor deficiency	0	0	0	0	0	0	0	0	0	0	0	0	0	0	0	0	0	0	0
226960	Lowry-wood Syndrome	0	0	0	0	0	0	0	0	0	0	0	0	0	0	0	0	0	0	0
PS601678	Bartter syndrome	0	0	0	1	0	0	0	1	0	0	0	0	0	0	0	1	0	0	0
280000	Zunich Neuroectodermal Syndrome	0	0	0	0	0	0	0	0	0	0	0	0	0	0	0	0	0	0	0
618729	Liang-wang Syndrome	0	0	0	0	0	0	0	0	0	0	0	0	0	0	0	0	0	0	0
310200	Muscular Dystrophy, Duchenne Type	4	0	0	1	0	0	29	74	2	0	0	9	0	15	163	81	1	1	7
618339	Infantile Cataract, Skin Abnormalities, Glutamate Excess, And Impaired Intellectual Development	0	0	0	0	0	0	0	0	0	0	0	0	0	0	0	0	0	0	0
PS602014	Hypomagnesemia	1	0	0	0	0	1	1	1	0	0	1	0	0	0	0	0	2	0	0
143095	Spondyloepiphyseal Dysplasia With Congenital Joint Dislocations	0	0	0	0	0	0	0	0	0	0	0	0	0	0	0	0	0	0	0
615182	Combined D-2- And L-2-hydroxyglutaric Aciduria	0	0	0	0	0	0	0	0	0	0	0	0	0	0	0	0	0	0	0
105830	Angelman Syndrome	0	0	0	0	0	0	0	0	0	0	0	0	0	0	0	0	0	0	0
PS190350	Trichorhinophalangeal syndrome	0	0	0	0	0	0	0	0	0	0	0	0	0	0	0	0	0	0	0
203450	Alexander Disease	6	3	3	6	6	0	0	3	2	1	0	2	3	8	1	6	2	7	3
249900	Metachromatic Leukodystrophy Due To Saposin B Deficiency	0	0	0	0	0	0	0	0	0	0	0	0	0	0	0	0	0	0	0
216340	Cleidocranial Dysplasia With Micrognathia, Absent Thumbs, And Distal	0	0	0	0	0	0	0	0	0	0	0	0	0	0	0	0	0	0	0
278250	Wrinkly Skin Syndrome	0	0	0	0	0	0	0	0	0	0	0	0	0	0	0	0	0	0	0
616975	Neurodevelopmental Disorder With Or Without Anomalies Of The Brain, Eye, Or Heart	0	0	0	0	0	0	0	0	0	0	0	0	0	0	0	0	0	0	0
268300	Roberts Syndrome	0	0	0	0	0	0	0	0	0	0	0	0	0	0	0	0	0	0	0
PS300755	Immunodeficiency (Select Examples)	0	2	1	0	0	0	0	0	0	0	0	0	0	1	0	0	0	1	0
616682	Seizures, Scoliosis, And Macrocephaly Syndrome	0	0	0	0	0	0	0	0	0	0	0	0	0	0	0	0	0	0	0
113620	Branchiooculofacial Syndrome	0	0	0	0	0	0	0	0	0	0	0	0	0	0	0	0	0	0	0
617532	Intellectual Developmental Disorder With Neuropsychiatric Features	0	0	0	0	0	0	0	0	0	0	0	0	0	0	0	0	0	0	0
618598	Spastic Tetraplegia And Axial Hypotonia, Progressive	0	0	0	0	0	0	0	0	0	0	0	0	0	0	0	0	0	0	0
618872	Nizon-isidor Syndrome	0	0	0	0	0	0	3	0	0	3	0	0	0	0	0	0	0	0	0
617182	Language Delay And Attention Deficit-hyperactivity Disorder/cognitive Impairment With Or Without Cardiac Arrhythmia	0	0	0	0	0	0	0	0	0	0	0	0	0	0	0	0	0	0	0
PS208085	Arthrogryposis, renal dysfunction, and cholestasis	0	0	0	0	0	0	0	0	0	0	0	0	0	0	0	0	0	0	0
605899	Glycine Encephalopathy	0	0	0	0	0	0	0	0	0	0	0	0	0	0	0	0	0	0	0
615575	Neuronopathy, Distal Hereditary Motor, Type Iid	0	0	0	0	0	0	0	0	0	0	0	0	0	0	0	0	0	0	0
618381	Facial Dysmorphism, Hypertrichosis, Epilepsy, Intellectual/developmental Delay, And Gingival Overgrowth Syndrome	0	0	0	0	0	0	0	0	0	0	0	0	0	0	0	0	0	0	0
300990	Midface Hypoplasia, Hearing Impairment, Elliptocytosis, And Nephrocalcinosis	0	0	0	0	0	0	0	0	0	0	0	0	0	0	0	0	0	0	0
614741	Mitochondrial Pyruvate Carrier Deficiency	0	0	0	0	0	0	0	0	0	0	0	0	0	0	0	0	0	1	0
PS212065	Congenital disorders of glycosylation, type I	0	0	0	0	0	0	0	0	0	1	0	0	0	0	1	0	0	0	1
PS160150	Myopathy, centronuclear	0	0	0	0	0	0	0	25	0	0	0	0	0	0	6	42	0	0	2
617988	Jaberi-elahi Syndrome	0	0	0	0	0	0	3	0	0	3	0	0	0	0	0	0	0	0	0
PS220210	Ritscher-Schinzel syndrome	0	0	0	0	0	0	0	0	0	0	0	0	0	0	0	0	0	0	0
600373	Codas Syndrome	0	0	0	0	0	0	0	0	0	0	0	0	0	0	0	0	0	0	0
PS601462	Myasthenic syndrome, congenital	0	0	0	0	0	0	0	11	0	0	0	0	0	0	1	31	0	0	0
618571	Neurodevelopmental Disorder With Cataracts, Poor Growth, And Dysmorphic Facies	0	0	0	0	0	0	0	0	0	0	0	0	0	0	0	0	0	0	0
618265	Arthrogryposis, Cleft Palate, Craniosynostosis, And Impaired Intellectual Development	0	0	0	0	0	0	0	0	0	0	0	0	0	0	0	0	0	0	0
618901	46,xx Sex Reversal 5	0	0	0	0	0	0	0	0	0	0	0	0	0	0	0	0	0	0	0
117300	Dementia, Familial Danish	0	0	0	0	0	0	0	0	0	0	0	0	0	0	0	0	0	0	0
272750	Tay-sachs Disease, Ab Variant	0	0	0	0	0	0	0	0	0	0	0	0	0	1	0	0	0	0	0
614369	Peripheral Neuropathy, Myopathy, Hoarseness, And Hearing Loss	0	0	0	0	0	0	0	0	0	0	0	0	0	0	0	0	0	0	0
275400	Oliver-mcfarlane Syndrome	0	0	0	0	0	0	0	0	0	0	0	0	0	0	0	0	0	0	0
PS251280	Diencephalic-mesencephalic junction dysplasia syndrome	0	0	0	0	0	0	0	0	0	0	0	0	0	0	0	0	0	0	0
612932	Glycogen Storage Disease Xiii	0	0	0	0	0	0	0	0	0	0	0	0	0	0	0	0	0	0	0
617062	Okur-chung Neurodevelopmental Syndrome	0	0	0	0	0	0	0	0	0	0	0	0	0	0	0	0	0	0	0
PS127550	Dyskeratosis congenita	0	0	0	0	0	0	0	0	0	0	0	0	0	0	0	0	0	0	0
606072	Rippling Muscle Disease	0	0	0	0	0	0	0	1	0	0	0	0	0	0	1	0	0	0	1
615381	Mandibular Hypoplasia, Deafness, Progeroid Features, And Lipodystrophysyndrome	0	0	0	0	0	0	0	0	0	0	0	0	0	0	0	0	0	0	0
206920	Microphthalmia With Limb Anomalies	0	0	0	0	0	0	0	0	0	0	0	0	0	0	0	0	0	0	0
601003	Brody Myopathy	0	0	0	0	0	0	0	1	0	0	0	0	0	0	0	0	0	0	0
PS603513	Spastic quadriplegic cerebral palsy	0	0	0	0	0	0	0	0	0	0	0	0	0	0	0	0	0	0	1
618416	Metabolic Crises, Recurrent, With Variable Encephalomyopathic Features And Neurologic Regression	0	0	0	0	0	0	0	0	0	0	0	0	0	0	0	0	0	0	0
PS151100	LEOPARD syndrome	0	0	0	0	0	0	0	0	0	0	0	0	0	0	0	0	1	0	0
263570	Polyglucosan Body Disease, Adult Form	0	0	0	0	0	0	0	0	0	0	0	0	0	0	0	0	0	0	0
609241	Schindler Disease, Type I	0	0	0	0	0	0	0	0	0	0	0	0	0	0	0	0	0	0	0
613161	Beta-ureidopropionase Deficiency	0	0	0	0	0	0	0	0	0	0	0	0	0	0	0	0	0	0	0
618056	Neurodevelopmental Disorder With Cerebellar Atrophy And With Or Without Seizures	0	0	0	0	0	0	0	0	0	0	0	0	0	0	0	0	0	0	0
611812	46,xx Sex Reversal With Dysgenesis Of Kidneys, Adrenals, And Lungs	0	0	0	0	0	0	0	0	0	0	0	0	0	0	0	0	0	0	0
PS601419	Myopathy, myofibrillar	0	0	0	0	0	0	0	43	0	0	0	0	0	0	4	44	0	0	4
606893	Vascular Malformation, Primary Intraosseous	0	0	0	0	0	0	0	0	0	0	0	0	0	0	0	0	0	0	0
266130	Glutathione Synthetase Deficiency	0	0	0	0	0	0	0	0	0	0	0	0	0	0	0	0	0	0	0
300661	Phosphoribosylpyrophosphate Synthetase Superactivity	0	0	0	0	0	0	0	0	0	0	0	0	0	0	0	0	0	0	0
616632	Seizures, Cortical Blindness, Microcephaly Syndrome	0	0	0	0	0	0	0	0	0	0	0	0	0	0	0	0	0	0	0
304100	Corpus Callosum, Partial Agenesis Of, X-linked	0	0	0	0	0	0	0	0	0	0	0	0	0	0	0	0	0	0	0
618732	Poirier-bienvenu Neurodevelopmental Syndrome	0	0	0	0	0	0	0	0	0	0	0	0	0	0	0	0	0	0	0
184900	Stiff Skin Syndrome	0	0	0	0	0	0	0	0	0	0	0	0	0	1	0	0	0	0	0
300004	Corpus Callosum, Agenesis Of, With Abnormal Genitalia	0	0	0	0	0	0	0	0	0	0	0	0	0	0	0	0	0	0	0
604484	Neuropathy, Hereditary Motor And Sensory, Okinawa Type	0	0	0	0	0	0	0	0	0	0	0	0	0	0	0	0	0	0	0
PS278300	Xanthinuria	0	0	0	0	0	0	0	0	0	0	0	0	0	0	0	0	0	0	0
607459	Sensory Ataxic Neuropathy, Dysarthria, And Ophthalmoparesis	0	0	0	0	0	0	0	0	0	0	0	0	0	0	0	0	0	0	0
PS188580	Thyrotoxic periodic paralysis	0	0	0	0	0	0	0	0	0	0	0	0	0	0	0	0	0	0	0
PS610253	Kleefstra syndrome	0	0	0	0	0	0	0	0	0	0	0	0	0	0	0	0	0	0	0
611067	Spinal Muscular Atrophy, Distal, Autosomal Recessive, 4	0	0	0	0	0	0	0	0	0	0	0	0	0	0	1	1	0	0	0
251100	Methylmalonic Aciduria, Cbla Type	0	0	0	0	0	0	0	0	0	0	0	0	0	0	0	0	0	0	0
613205	Muscular Dystrophy, Congenital, Lmna-related	0	0	0	0	0	0	0	0	0	0	0	0	0	0	1	0	0	0	0
616728	Cleft Palate, Psychomotor Retardation, And Distinctive Facial Features	0	0	0	0	0	0	0	0	0	0	0	0	0	0	0	0	0	0	0
617732	Facial Palsy, Congenital, With Ptosis And Velopharyngeal Dysfunction	0	0	0	0	0	0	0	0	0	0	0	0	0	0	0	0	0	0	0
PS210600	Seckel syndrome	0	0	0	0	0	0	0	0	0	0	0	0	0	0	0	0	0	0	0
182212	Shprintzen-goldberg Craniosynostosis Syndrome	0	0	0	0	0	0	0	0	0	0	0	0	0	0	0	0	0	0	0
311900	Tarp Syndrome	0	0	0	0	0	0	0	0	0	0	0	0	0	0	0	0	0	0	0
617352	Mulchandani-bhoj-conlin Syndrome	0	0	0	0	0	0	0	0	0	0	0	0	0	0	0	0	0	0	0
235730	Mowat-wilson Syndrome	0	0	0	0	0	0	0	0	0	0	0	0	0	0	0	0	0	0	0
PS603075	Macular degeneration, age-related	5	0	0	0	0	1	0	0	4	0	0	1	0	16	0	0	0	0	0
617364	Congenital Heart Defects And Ectodermal Dysplasia	0	0	0	0	0	0	0	0	0	0	0	0	0	0	0	0	0	0	0
154700	Marfan Syndrome	0	0	0	5	0	0	0	0	2	0	0	0	0	0	1	0	24	0	3
PS167320	Inclusion body myopathy/Paget disease/frontotemporal dementia	1	0	0	0	0	0	0	0	0	0	0	0	0	0	0	0	0	0	0
210000	Behr Syndrome	0	0	0	0	0	0	0	0	0	0	0	0	0	0	0	0	0	0	0
618346	Microcephaly, Growth Deficiency, Seizures, And Brain Malformations	0	0	0	0	0	0	0	0	0	0	0	0	0	0	0	0	0	0	0
606703	Dyskinesia, Familial, With Facial Myokymia	0	0	0	0	0	0	0	0	0	0	0	0	0	0	0	0	0	0	0
PS249500	Mental retardation, autosomal recessive	0	0	0	0	0	0	0	0	0	0	0	0	0	1	0	1	0	0	0
PS228520	Fibrochondrogenesis	0	0	0	0	0	0	0	0	0	0	0	1	0	0	0	0	0	0	2
616651	Roifman Syndrome	0	0	0	0	0	0	0	0	0	0	0	0	0	0	0	0	0	0	0
PS211530	Brown-Vialetto-Van Laere syndrome	0	0	0	0	0	0	0	0	0	0	0	0	0	0	0	0	0	0	0
230600	Gm1-gangliosidosis, Type Ii	0	0	0	0	0	0	0	0	0	0	0	0	0	2	0	0	0	0	0
PS178110	Contractures, pterygia, and variable skeletal fusions syndrome	0	0	0	0	0	0	0	0	0	0	0	0	0	0	0	0	0	0	0
613730	Hemorrhagic Destruction Of The Brain, Subependymal Calcification,and Cataracts	0	0	0	0	0	0	0	0	0	0	0	0	0	0	0	0	0	0	0
272200	Multiple Sulfatase Deficiency	0	0	0	0	0	0	0	0	0	0	1	0	0	0	0	0	0	0	0
618492	Neurodevelopmental Disorder With Microcephaly And Structural Brain Anomalies	0	0	0	0	0	0	0	0	0	0	0	0	0	0	0	0	0	0	0
PS135900	Coffin-Siris syndrome	0	0	0	0	0	0	0	0	0	0	0	0	0	0	0	0	0	0	0
600794	Neuronopathy, Distal Hereditary Motor, Type V	0	0	0	0	0	0	0	0	0	0	0	0	0	0	0	0	0	0	0
PS105650	Diamond-Blackfan anemia	0	0	0	0	0	0	0	0	0	0	0	0	0	0	0	0	0	0	0
264470	Peroxisomal Acyl-coa Oxidase Deficiency	0	0	0	0	0	0	0	0	0	0	0	0	0	0	0	0	0	0	0
614457	Ichthyosis, Spastic Quadriplegia, And Mental Retardation	0	0	0	0	0	0	0	0	0	0	0	0	0	0	0	0	0	0	0
615281	Hypomyelination With Brainstem And Spinal Cord Involvement And Legspasticity	0	0	0	0	0	0	0	0	0	0	0	0	0	0	0	0	0	0	0
611890	Congenital Arthrogryposis With Anterior Horn Cell Disease	0	0	0	0	0	0	0	0	0	0	0	0	0	0	0	1	0	0	0
253550	Spinal Muscular Atrophy, Type Ii	0	0	0	0	0	0	0	6	0	0	0	0	0	0	2	5	0	0	1
PS248370	Mandibuloacral dysplasia with lipodystrophy	0	0	0	0	0	0	0	0	0	0	0	0	0	0	0	0	0	0	0
612716	Dystonia, Dopa-responsive, Due To Sepiapterin Reductase Deficiency	0	0	0	0	0	0	0	0	0	0	0	0	0	0	0	0	0	0	0
618278	Fibrosis, Neurodegeneration, And Cerebral Angiomatosis	0	0	0	0	0	0	0	0	0	0	0	0	0	0	0	0	0	0	0
274000	Thrombocytopenia-absent Radius Syndrome	0	0	0	0	0	0	0	0	0	0	0	0	0	0	0	0	0	0	0
PS609060	Combined oxidative phosphorylation deficiency	2	1	1	3	0	0	0	4	0	0	0	3	0	2	4	1	2	1	3
309580	Mental Retardation-hypotonic Facies Syndrome, X-linked, 1	0	0	0	0	0	0	0	0	0	0	0	0	0	0	0	0	0	0	0
PS100300	Adams-Oliver syndrome	0	0	0	0	0	0	0	0	0	0	0	0	0	1	0	0	0	0	0
618092	Intellectual Developmental Disorder With Speech Delay, Dysmorphic Facies, And T-cell Abnormalities	0	0	0	0	0	0	0	0	0	0	0	0	0	0	0	0	0	0	0
617157	Short Stature, Brachydactyly, Intellectual Developmental Disability, And Seizures	0	0	0	0	0	0	0	0	0	0	0	0	0	0	0	0	0	0	0
245200	Krabbe Disease	0	0	0	1	0	0	0	0	1	0	1	0	0	0	0	2	0	0	3
617478	Structural Heart Defects And Renal Anomalies Syndrome	0	0	0	0	0	0	0	0	0	0	0	0	0	0	0	0	0	0	0
255800	Schwartz-jampel Syndrome, Type 1	1	0	1	0	0	0	0	1	0	0	0	0	0	1	0	1	0	0	4
618343	Polymicrogyria With Or Without Vascular-type Ehlers-danlos Syndrome	0	0	0	0	0	0	0	0	0	0	0	0	0	0	0	0	0	0	0
164200	Oculodentodigital Dysplasia	0	0	0	0	0	0	0	0	0	0	0	1	0	0	0	0	0	0	0
261630	Phenylketonuria Ii	0	0	0	0	0	0	0	0	0	0	0	1	0	0	0	0	0	0	0
276820	Ulna And Fibula, Absence Of, With Severe Limb Deficiency	0	0	0	0	0	0	0	0	0	0	0	0	0	0	0	0	0	0	0
615574	Asparagine Synthetase Deficiency	0	0	0	0	0	0	0	0	0	0	0	0	0	0	0	0	0	0	0
210710	Microcephalic Osteodysplastic Primordial Dwarfism, Type I	0	0	0	0	0	0	0	0	0	0	0	0	0	0	0	0	0	0	0
PS600118	Warburg micro syndrome	0	0	0	0	0	0	0	0	0	0	0	0	0	0	0	0	0	0	0
PS604772	Ventricular tachycardia, catecholaminergic polymorphic	0	0	0	0	0	0	0	3	0	0	0	0	0	0	0	3	0	0	0
612138	Epidermolysis Bullosa Simplex With Pyloric Atresia	0	0	0	0	0	0	0	0	0	0	0	0	0	0	0	0	0	0	0
618950	Suleiman-el-hattab Syndrome	0	0	0	0	0	0	0	0	0	0	0	0	0	0	0	0	0	0	0
618273	Mega-corpus-callosum Syndrome With Cerebellar Hypoplasia And Cortical Malformations	0	0	0	0	0	0	0	0	0	0	0	0	0	0	0	0	0	0	0
130650	Beckwith-wiedemann Syndrome	0	0	0	0	0	0	0	1	0	0	0	0	1	1	0	0	0	0	0
271665	Spondylometaepiphyseal Dysplasia, Short Limb-hand Type	0	0	0	0	0	0	0	0	0	0	0	0	0	0	0	0	0	0	0
617360	Congenital Heart Defects, Dysmorphic Facial Features, And Intellectual Developmental Disorder	0	0	0	0	0	0	0	0	0	0	0	0	0	0	0	0	0	0	0
245340	Erythrocyte Lactate Transporter Defect	0	0	0	1	0	0	0	1	0	0	0	0	0	1	0	0	0	0	0
615704	Poikiloderma, Hereditary Fibrosing, With Tendon Contractures, Myopathy,and Pulmonary Fibrosis	0	0	0	0	0	0	0	0	0	0	0	0	0	0	0	0	0	0	0
612938	Growth Retardation, Developmental Delay, Coarse Facies, And Early	0	0	0	0	0	0	0	0	0	0	0	0	0	0	0	0	0	0	0
615924	Encephalopathy, Progressive, With Or Without Lipodystrophy	0	0	0	0	0	0	0	0	0	0	0	0	0	0	0	0	0	0	0
618010	Glycosylphosphatidylinositol Biosynthesis Defect 17	0	0	0	0	0	0	0	0	0	0	0	0	0	0	0	0	0	0	0
617865	Neurodevelopmental Disorder With Movement Abnormalities, Abnormal Gait, And Autistic Features	0	0	0	0	0	0	0	0	0	0	0	0	0	0	0	0	0	0	0
616459	Al-raqad Syndrome	0	0	0	0	0	0	0	0	0	0	0	0	0	0	0	0	0	0	0
146500	Multiple System Atrophy 1, Susceptibility To	0	0	0	0	0	0	0	1	0	0	0	0	0	0	1	1	0	0	0
139210	Myhre Syndrome	0	0	0	0	0	0	0	0	0	0	0	0	0	0	0	0	0	0	0
258480	Opsismodysplasia	0	0	0	0	0	0	0	0	0	0	0	0	0	0	0	0	0	0	0
301029	Shukla-vernon Syndrome	0	0	0	0	0	0	0	0	0	0	0	0	0	0	0	0	0	0	0
PS251290	Pseudo-TORCH syndrome	0	0	0	0	0	0	0	0	0	0	0	0	0	1	0	0	0	0	0
PS257300	Mosaic variegated aneuploidy syndrome	0	0	0	0	0	0	0	0	0	0	0	0	0	0	0	0	0	0	0
PS147950	Hypogonadotropic hypogonadism with or without anosmia	0	0	0	0	0	0	0	0	0	0	0	0	1	0	1	0	1	0	0
619072	Neurodevelopmental Disorder With Seizures And Brain Atrophy	0	0	0	0	0	0	0	0	0	0	0	0	0	0	0	0	0	0	0
619005	Neurodevelopmental Disorder With Dysmorphic Facies, Impaired Speech And Hypotonia	0	0	0	0	0	0	0	0	0	0	0	0	0	0	0	0	0	0	0
609220	Bruck Syndrome 2	0	0	0	0	0	0	0	0	0	0	0	0	0	0	0	0	0	0	0
255600	Myosclerosis, Autosomal Recessive	0	0	0	0	0	0	0	0	0	0	0	0	0	0	0	0	0	0	0
241530	Hypophosphatemic Rickets With Hypercalciuria, Hereditary	0	0	0	0	0	0	0	0	0	0	0	0	0	0	0	0	0	0	0
241410	Hypoparathyroidism-retardation-dysmorphism Syndrome	0	0	0	0	0	0	0	0	0	0	0	0	0	0	0	0	0	0	0
612780	Seizures, Sensorineural Deafness, Ataxia, Mental Retardation, And	0	0	0	0	0	0	0	0	0	0	0	0	0	0	0	0	0	0	0
618622	Neurodevelopmental Disorder With Microcephaly, Arthrogryposis, And Structural Brain Anomalies	0	0	0	0	0	0	0	0	0	0	0	0	0	0	0	0	0	0	0
614559	Infantile Cerebellar-retinal Degeneration	0	0	0	0	0	0	0	0	0	0	0	0	0	0	0	0	0	0	0
618733	Neuromuscular Disease And Ocular Or Auditory Anomalies With Or Without Seizures	0	0	0	0	0	0	0	0	0	0	0	0	0	0	0	0	0	0	0
275210	Tight Skin Contracture Syndrome, Lethal	0	0	0	0	0	0	0	0	0	0	0	0	0	0	0	0	0	0	0
PS224050	Cerebellar ataxia, mental retardation, and dysequilibrium	0	0	0	0	0	0	0	0	0	0	0	0	0	0	0	0	0	0	0
233910	Gtp Cyclohydrolase I Deficiency	0	0	0	0	0	0	0	0	0	0	0	0	0	0	0	0	0	0	0
261670	Phosphoglycerate Mutase, Muscle, Deficiency Of	0	0	0	0	0	0	0	0	0	0	0	0	0	0	0	0	0	0	0
278760	Xeroderma Pigmentosum, Complementation Group F	0	0	0	0	0	0	0	0	0	0	0	0	0	0	0	0	0	0	0
PS607086	Aortic aneurysm, familial thoracic	0	0	0	0	0	0	0	0	0	0	0	0	0	0	0	0	0	0	1
PS213300	Joubert syndrome	0	0	0	0	0	0	0	0	0	0	0	0	0	0	0	0	0	0	0
176000	Porphyria, Acute Intermittent	0	0	0	0	0	0	1	0	0	0	0	0	0	0	0	0	0	0	0
617296	Spastic Paraplegia, Intellectual Disability, Nystagmus, And Obesity	0	0	0	0	0	0	0	0	0	0	0	0	0	0	0	0	0	0	0
264070	Hyperphenylalaninemia, Bh4-deficient, D	0	0	0	0	0	0	0	0	0	0	0	0	0	0	0	0	0	0	0
601104	Supranuclear Palsy, Progressive, 1	1	0	0	0	0	0	0	0	0	0	0	1	0	0	0	0	0	0	0
618635	Siddiqi Syndrome	0	0	0	0	0	0	0	0	0	0	0	0	0	0	0	0	0	0	0
618443	Neurodevelopmental Disorder With Or Without Variable Brain Abnormalities	0	0	0	0	0	0	0	0	0	0	0	0	0	0	0	0	0	0	0
PS167250	Paget disease of bone	1	0	0	0	0	0	0	0	2	0	0	1	0	2	0	0	0	0	4
610455	Tumoral Calcinosis, Normophosphatemic, Familial	0	0	0	0	0	0	0	0	0	0	0	0	0	0	0	0	0	0	0
613563	Noonan Syndrome-like Disorder With Or Without Juvenile Myelomonocyticleukemia	0	0	0	0	0	0	0	0	0	0	0	0	0	0	0	0	0	0	0
614023	Phosphoserine Phosphatase Deficiency	0	0	0	0	0	0	0	0	0	0	0	0	0	0	0	0	0	0	0
609460	Goldberg-shprintzen Syndrome	0	0	0	0	0	0	0	0	0	0	0	0	0	0	0	0	0	0	0
616756	Spastic Paraplegia And Psychomotor Retardation With Or Without Seizures	0	0	0	0	0	0	0	0	0	0	0	0	0	0	0	0	0	0	0
618961	Spondylometaphyseal Dysplasia With Corneal Dystrophy	0	0	0	0	0	0	0	0	0	0	0	0	0	0	0	0	0	0	0
619074	Cleft Palate, Proliferative Retinopathy, And Developmental Delay	0	0	0	0	0	0	0	0	0	0	0	0	0	0	0	0	0	0	0
617051	Mental Retardation, Autosomal Recessive 55	0	0	0	0	0	0	0	0	0	0	0	0	0	0	0	0	0	0	0
618718	Neurodevelopmental Disorder With Behavioral Abnormalities, Absent Speech, And Hypotonia	0	0	0	0	0	0	0	0	0	0	0	0	0	0	0	0	0	0	0
PS131100	Multiple endocrine neoplasia	0	0	0	0	0	0	0	0	0	0	0	0	1	2	0	1	0	0	0
PS615895	Polyglucosan body myopathy	0	0	0	0	0	0	0	0	0	0	0	0	0	0	0	0	0	0	0
PS125310	Cerebral arteriopathy with subcortical infarcts and leukoencephalopathy	4	0	0	4	0	2	0	1	0	0	0	0	0	30	0	2	13	0	0
618859	Neurodevelopmental Disorder With Or Without Autistic Features And/or Structural Brain Abnormalities	1	0	0	1	0	1	0	0	0	0	0	1	0	11	0	0	1	0	0
618890	Neurodevelopmental Disorder And Structural Brain Anomalies With Or Without Seizures And Spasticity	0	0	0	0	0	0	0	0	0	0	0	0	0	0	0	0	0	0	0
275630	Chanarin-dorfman Syndrome	0	0	0	0	0	0	0	0	0	0	0	0	0	0	0	0	0	0	0
617862	Neurodevelopmental Disorder With Microcephaly, Epilepsy, And Brain Atrophy	0	0	0	0	0	0	0	0	0	0	0	0	0	0	0	0	0	0	0
609033	Ataxia, Posterior Column, With Retinitis Pigmentosa	0	0	0	0	0	0	0	0	0	0	0	0	0	0	0	0	0	0	0
232800	Glycogen Storage Disease Vii	0	0	0	0	0	0	0	0	0	0	0	0	0	0	0	0	0	0	0
612740	Porphyria, Acute Hepatic	0	0	0	0	0	0	0	0	0	0	0	0	0	0	0	0	0	0	0
PS236100	Holoprosencephaly	0	0	0	0	0	0	0	1	0	0	0	0	0	0	0	0	0	0	0
617519	Myopathy, Congenital, With Neuropathy And Deafness	0	0	0	0	0	0	0	0	0	0	0	0	0	0	0	0	0	0	0
PS135700	Fibrosis of extraocular muscles, congenital	0	0	0	0	0	0	0	0	0	0	0	0	0	0	1	0	0	0	0
618342	Intellectual Developmental Disorder With Abnormal Behavior, Microcephaly, And Short Stature	0	0	0	0	0	0	0	0	0	0	0	0	0	0	0	0	0	0	0
251000	Methylmalonic Aciduria Due To Methylmalonyl-coa Mutase Deficiency	0	0	0	0	0	0	0	0	0	0	0	0	0	0	0	0	0	0	0
615512	Triosephosphate Isomerase Deficiency	0	0	0	0	0	0	0	0	0	0	0	0	0	0	0	0	0	0	0
612394	Bone Fragility With Contractures, Arterial Rupture, And Deafness	0	0	0	0	0	0	0	0	0	0	0	0	0	0	0	0	0	0	0
194080	Denys-drash Syndrome	0	0	0	0	0	0	0	0	0	0	0	0	1	0	0	0	0	0	0
617268	Neurodevelopmental Disorder With Hypotonia, Seizures, And Absent Language	0	0	0	0	0	0	0	0	0	0	0	0	0	0	0	0	0	0	0
PS309510	Mental retardation, X-linked syndromic	0	0	0	0	0	0	1	0	0	0	0	0	0	3	1	0	0	0	0
277440	Vitamin D-dependent Rickets, Type Ii	0	0	0	0	0	0	0	0	0	0	0	0	0	0	0	0	0	0	2
PS236670	Muscular dystrophy-dystroglycanopathy, type A	0	0	0	0	0	0	0	0	0	0	0	0	0	0	1	0	0	0	0
616839	Exercise Intolerance, Riboflavin-responsive	0	0	0	0	0	0	0	0	0	0	0	0	0	0	0	0	0	0	0
PS254130	Miyoshi muscular dystrophy	0	0	0	1	0	0	0	1	0	0	0	0	0	0	1	1	0	0	0
PS251300	Galloway-Mowat syndrome	0	0	0	0	0	0	0	0	0	0	0	0	0	0	0	0	0	0	0
256840	Neuropathy, Hereditary Sensory, With Spastic Paraplegia, Autosomal	0	0	0	0	0	0	0	0	0	0	0	0	0	0	0	1	0	0	0
618798	Beck-fahrner Syndrome	0	0	0	0	0	0	0	0	0	0	0	0	0	0	0	0	0	0	0
300232	Spondyloepimetaphyseal Dysplasia, X-linked, With Mental Deterioration	0	0	0	0	0	0	0	0	0	0	0	0	0	0	0	0	0	0	0
305450	Opitz-kaveggia Syndrome	0	0	0	0	0	0	0	0	0	0	0	0	0	0	0	0	0	0	0
614561	Leukoencephalopathy, Brain Calcifications, And Cysts	0	0	0	0	0	0	0	0	0	0	0	0	0	0	0	0	0	0	0
231000	Gaucher Disease, Type Iii	1	0	0	0	0	0	0	0	7	0	0	0	1	2	0	0	0	2	1
617822	Alkuraya-kucinskas Syndrome	0	0	0	0	0	0	0	0	0	0	0	0	0	0	0	0	0	0	0
618922	Neurodevelopmental Disorder With Seizures, Hypotonia, And Brain Imaging Abnormalities	0	0	0	0	0	0	0	0	0	0	0	0	0	0	0	0	0	0	0
602535	Marshall-smith Syndrome	0	0	0	0	0	0	0	0	0	0	0	0	0	0	0	0	0	0	0
604290	Aceruloplasminemiahypoceruloplasminemia, Included	1	0	0	1	2	0	0	1	0	1	0	0	0	2	0	1	1	0	3
226730	Epidermolysis Bullosa Junctionalis With Pyloric Atresia	0	0	0	0	0	0	0	0	0	0	0	0	0	0	0	0	0	0	0
609153	Pseudohyperkalemia, Familial, 2, Due To Red Cell Leak	0	0	0	0	0	0	0	0	0	0	0	0	0	0	0	0	0	0	0
618725	Intellectual Developmental Disorder With Behavioral Abnormalities And Craniofacial Dysmorphism With Or Without Seizures	0	0	0	0	0	0	0	0	0	0	0	0	0	0	0	0	0	0	0
PS108120	Arthrogryposis, distal	0	0	0	0	0	0	0	8	0	0	0	0	0	0	0	6	0	0	0
300322	Lesch-nyhan Syndrome	0	0	0	0	0	0	2	0	0	0	0	0	0	0	0	1	0	0	0
PS260400	Schwachman-Diamond syndrome	0	0	0	0	0	0	0	0	0	0	0	0	0	0	0	0	0	0	0
618124	Peripheral Neuropathy, Autosomal Recessive, With Or Without Impaired Intellectual Development	0	0	0	0	0	0	0	0	0	0	0	0	0	0	0	0	0	0	0
617641	Congenital Anomalies Of Kidney And Urinary Tract Syndrome With Or Without Hearing Loss, Abnormal Ears, Or Developmental Delay	0	0	0	0	0	0	0	0	0	0	0	0	0	0	0	0	0	0	0
618419	Gonadal Dysgenesis, Dysmorphic Facies, Retinal Dystrophy, And Myopathy	0	0	0	0	0	0	0	0	0	0	0	0	0	0	0	0	0	0	0
617669	Encephalopathy, Progressive, Early-onset, With Brain Atrophy And Spasticity	0	0	0	0	0	0	0	0	0	0	0	0	0	0	0	0	0	0	0
612933	Glycogen Storage Disease Xi	0	0	0	0	0	0	0	0	0	0	0	1	0	0	0	0	0	0	0
300831	Ck Syndrome	0	0	0	1	0	0	0	1	2	0	0	0	0	1	2	2	1	0	0
617694	Al Kaissi Syndrome	0	0	0	0	0	0	0	0	0	0	0	0	0	0	0	0	0	0	0
PS601068	Epilepsy, familial adult myoclonic	0	0	0	0	0	0	0	0	0	0	0	0	0	0	0	0	0	0	1
618541	Hypopigmentation, Organomegaly, And Delayed Myelination And Development	0	0	0	0	0	0	0	0	0	0	0	0	0	0	0	0	0	0	0
113650	Branchiootorenal Syndrome 1	0	0	0	0	0	0	0	0	0	0	0	0	0	0	0	0	0	0	0
214500	Chediak-higashi Syndrome	0	0	0	0	0	0	1	0	0	19	1	0	0	0	0	0	0	0	1
614255	Mental Retardation, Autosomal Dominant 9	0	0	0	0	0	0	0	0	0	0	0	0	0	0	0	0	0	0	0
618440	Oculoskeletodental Syndrome	0	0	0	0	0	0	0	0	0	0	0	0	0	0	0	0	0	0	0
616260	Tenorio Syndrome	0	0	0	0	0	0	0	0	0	0	0	0	0	0	0	0	0	0	0
617193	Encephalopathy, Progressive, Early-onset, With Brain Atrophy And Thin Corpus Callosum	0	0	0	0	0	0	0	0	0	0	0	0	0	0	0	0	0	0	0
129200	Basan Syndrome	0	0	0	0	0	0	0	0	0	0	0	0	0	0	0	0	0	0	0
PS617877	Short stature, facial dysmorphism, and skeletal anomalies with or without cardiac anomalies	0	0	0	1	0	0	0	0	0	0	0	0	2	0	0	0	1	0	1
300559	Muscle Glycogenosis, X-linked	0	0	0	0	0	0	0	0	0	0	0	0	0	0	0	0	0	0	0
PS619115	Combined osteogenesis imperfecta and Ehlers-Danlos syndrome	0	0	0	0	0	0	0	0	0	0	0	0	0	0	0	0	0	0	0
618354	Neurodevelopmental Disorder And Language Delay With Or Without Structural Brain Abnormalities	0	0	0	0	0	0	0	0	0	0	0	0	0	0	0	0	0	0	0
618205	Snijders Blok-campeau Syndrome	0	0	0	0	0	0	0	0	0	0	0	0	0	0	0	0	0	0	0
617107	Thauvin-robinet-faivre Syndrome	0	0	0	0	0	0	0	0	0	0	0	0	0	0	0	0	0	0	0
PS118220	Charcot-Marie-Tooth disease	0	0	0	0	0	0	0	3	0	0	0	1	0	1	1	6	0	0	4
616638	Smith-kingsmore Syndrome	0	0	0	0	0	0	0	0	0	0	0	0	0	0	0	0	0	0	0
616231	Myopathy, Vacuolar, With Casq1 Aggregates	0	0	0	0	0	0	0	0	0	0	0	0	0	0	0	0	0	0	0
232400	Glycogen Storage Disease Iii	0	0	0	0	0	0	0	4	0	0	0	0	0	1	1	0	0	0	0
613330	Spondylo-megaepiphyseal-metaphyseal Dysplasia	0	0	0	0	0	0	0	0	0	0	0	0	0	0	0	0	0	0	0
614254	Neurodevelopmental Disorder With Or Without Hyperkinetic Movements And Seizures, Autosomal Dominant	0	0	0	0	0	0	0	0	0	0	0	0	0	0	0	0	0	0	0
616723	Spondyloepimetaphyseal Dysplasia, Faden-alkuraya Type	0	0	0	0	0	0	0	0	0	0	0	0	0	0	0	0	0	0	0
618451	Neurodegeneration, Early-onset, With Choreoathetoid Movements And Microcytic Anemia	0	0	0	0	0	0	0	0	0	0	0	0	0	0	0	0	0	0	0
609162	Czech Dysplasia, Metatarsal Type	0	0	0	0	0	0	0	0	0	0	0	0	0	0	0	0	0	0	0
610978	Choreoathetosis, Hypothyroidism, And Neonatal Respiratory Distresschoreoathetosis And Congenital Hypothyroidism, Included	0	0	0	0	0	0	0	0	0	0	0	0	0	0	0	0	0	0	0
613670	Mental Retardation With Language Impairment And With Or Without Autistic Features	0	0	0	0	0	0	0	0	0	0	0	0	0	0	0	0	0	0	0
618748	Intellectual Developmental Disorder With Hypotonia And Behavioral Abnormalities	0	0	0	0	0	0	0	0	0	0	0	0	0	0	0	0	0	0	0
PS184255	Spondylometaphyseal dysplasia	0	0	0	0	0	0	0	0	0	0	0	0	0	0	0	0	0	0	0
615511	Myopathy Due To Myoadenylate Deaminase Deficiency	0	0	0	0	0	0	0	1	0	0	0	0	0	0	0	1	0	0	0
618808	Intellectual Developmental Disorder With Poor Growth And With Or Without Seizures Or Ataxia	0	0	0	0	0	0	0	0	0	0	0	0	0	0	0	0	0	0	0
619036	Myopathy, Epilepsy, And Progressive Cerebral Atrophy	0	0	0	0	0	0	0	0	0	0	0	0	0	0	0	0	0	0	0
619091	Neurodevelopmental Disorder With Microcephaly, Impaired Language, And Gait Abnormalities, Autosomal Recessive	0	0	0	0	0	0	0	0	0	0	0	0	0	0	0	0	0	0	0
612289	Fontaine Progeroid Syndrome	0	0	0	0	0	0	0	0	0	0	0	0	0	0	0	0	0	0	0
618547	Neurodevelopmental Disorder With Visual Defects And Brain Anomalies	0	0	0	0	0	0	0	0	0	0	0	0	0	0	0	0	0	0	0
617450	Intellectual Developmental Disorder With Gastrointestinal Difficulties And High Pain Threshold	0	0	0	0	0	0	0	0	0	0	0	0	0	0	0	0	0	0	0
304700	Mohr-tranebjaerg Syndrome	0	0	0	0	0	0	0	0	0	0	0	0	0	0	0	0	0	0	0
613027	Glycogen Storage Disease Ixc	0	0	0	0	0	0	0	0	0	0	0	0	0	0	0	0	0	0	0
226650	Epidermolysis Bullosa, Junctional, Non-herlitz Type	0	0	0	0	0	0	0	0	0	0	0	0	0	0	0	0	0	0	0
PS305400	FG syndrome	0	0	0	0	0	0	0	1	0	0	0	0	0	0	0	1	0	0	0
300653	Phosphoglycerate Kinase 1 Deficiency	0	0	0	0	0	0	0	0	0	0	0	0	0	0	0	0	0	0	0
609049	Pierson Syndrome	0	0	0	0	0	0	0	0	0	0	0	0	0	0	0	0	0	0	0
257200	Niemann-pick Disease, Type A	0	0	0	0	0	0	0	0	0	0	0	0	0	0	0	0	0	0	0
PS123000	Craniometaphyseal dysplasia	0	0	0	0	0	0	0	0	0	0	0	0	0	0	0	0	0	0	0
PS123100	Craniosynostosis	0	0	0	0	0	0	0	0	0	0	0	1	0	1	0	0	0	0	1
606768	Myopathy, Distal, With Anterior Tibial Onset	0	0	0	0	0	0	0	0	0	0	0	0	0	0	0	0	0	0	0
617452	Intellectual Developmental Disorder With Dysmorphic Facies, Seizures, And Distal Limb Anomalies	0	0	0	0	0	0	0	0	0	0	0	0	0	0	0	0	0	0	0
PS613038	Pituitary hormone deficiency, combined	1	0	0	0	0	0	0	0	0	0	0	0	1	0	0	0	0	0	0
PS156610	Skin creases, congenital symmetric circumferential	0	0	0	0	0	0	0	0	0	0	0	0	0	0	0	0	0	0	0
619099	Intellectual Developmental Disorder With Speech Delay And Axonal Peripheral Neuropathy	0	0	0	0	0	0	0	0	0	0	0	0	0	0	0	0	0	0	0
255320	Minicore Myopathy With External Ophthalmoplegia	0	0	0	0	0	0	0	1	0	0	0	0	0	0	0	1	0	0	0
602473	Encephalopathy, Ethylmalonic	0	0	0	0	0	0	0	0	0	0	0	0	0	0	0	0	0	0	0
611773	Angiopathy, Hereditary, With Nephropathy, Aneurysms, And Muscle Cramps	0	0	0	0	0	0	0	0	0	0	0	0	0	0	0	0	0	0	0
PS158600	Spinal muscular atrophy, lower extremity-predominant	0	0	0	0	0	0	0	0	0	0	0	0	0	0	0	1	0	0	0
147750	Ivic Syndrome	0	0	0	0	0	0	0	0	0	0	0	0	0	0	0	0	0	0	0
230900	Gaucher Disease, Type Ii	1	0	0	0	0	0	0	0	7	0	0	0	1	2	0	0	0	2	1
PS308350	Developmental and epileptic encephalopathy	0	0	0	1	0	0	0	1	0	0	0	0	0	1	0	0	0	0	0
PS600462	Myopathy, lactic acidosis, and sideroblastic anemia	0	0	0	0	0	0	0	0	0	0	0	0	0	0	0	0	0	0	0
208400	Aspartylglucosaminuria	0	0	0	0	0	0	0	0	0	0	0	0	0	1	0	0	0	0	0
PS251450	Desbuquois dysplasia	0	0	0	0	0	0	0	0	0	0	0	0	0	0	0	0	0	0	0
618076	Neurodevelopmental Disorder With Spasticity And Poor Growth	0	0	0	0	0	0	0	0	0	0	0	0	0	0	0	0	0	0	0
618912	Sorbitol Dehydrogenase Deficiency With Peripheral Neuropathy	0	0	0	0	0	0	0	0	0	0	0	0	0	0	0	0	0	0	0
218040	Costello Syndrome	0	0	0	0	0	0	0	0	0	0	0	0	0	0	0	0	0	0	0
614063	N-acetylaspartate Deficiency	0	0	0	0	0	0	0	0	0	0	0	0	0	0	0	0	0	0	0
313200	Spinal And Bulbar Muscular Atrophy, X-linked 1	0	0	0	0	0	0	0	1	0	0	0	0	0	0	0	2	0	0	1
277590	Weaver Syndrome	0	0	0	0	0	0	0	0	0	0	0	0	0	0	0	0	0	0	0
615889	Leukoencephalopathy, Progressive, With Ovarian Failure	0	0	0	0	0	0	0	0	0	0	0	0	0	0	0	0	0	0	0
618960	Mitchell Syndrome	1	1	0	1	0	0	0	2	0	0	0	0	0	0	1	0	0	0	1
619092	Neurodevelopmental Disorder With Microcephaly, Impaired Language, Epilepsy, And Gait Abnormalities, Autosomal Dominant	0	0	0	0	0	0	0	0	0	0	0	0	0	0	0	0	0	0	0
PS212066	Congenital disorders of glycosylation, type II	0	0	0	0	0	0	0	0	0	0	0	0	0	0	1	0	0	0	0
PS607634	Osteopetrosis, autosomal dominant	0	0	0	0	0	0	0	0	0	0	0	0	0	0	0	0	0	0	0
618292	Neurodevelopmental Disorder With Impaired Intellectual Development, Hypotonia, And Ataxia	0	0	0	0	0	0	0	0	0	0	0	0	0	0	0	0	0	0	0
PS601471	Facial paresis, hereditary congenital	0	0	0	0	0	0	0	0	0	0	0	0	0	0	0	0	0	0	0
618524	Myopathy, Congenital, With Tremor	0	0	0	0	0	0	0	0	0	0	0	0	0	0	0	0	0	0	0
601321	Neurofibromatosis-noonan Syndrome	0	0	0	0	0	0	0	0	0	0	0	0	0	0	0	0	0	0	0
618877	Leukoencephalopathy, Developmental Delay, And Episodic Neurologic Regression Syndrome	0	0	0	0	0	0	0	0	0	0	0	0	0	0	0	0	0	0	0
182410	Sneddon Syndrome	0	0	0	1	0	0	0	0	0	0	0	0	0	0	0	0	0	0	0
208250	Camptodactyly-arthropathy-coxa Vara-pericarditis Syndrome	0	0	0	0	0	0	0	0	0	0	0	0	0	0	0	0	0	0	1
614857	Methylmalonic Aciduria And Homocystinuria, Cblj Type	0	0	0	0	0	0	0	0	0	0	0	0	0	0	0	0	0	0	0
131300	Camurati-engelmann Disease	0	0	0	0	0	0	0	0	0	0	0	0	0	0	0	0	0	0	0
242840	Immunodeficiency With Cleft Lip/palate, Cataract, Hypopigmentation,and Absent Corpus Callosum	0	0	0	0	0	0	0	0	0	0	0	0	0	0	0	0	0	0	0
234500	Hartnup Disorder	0	0	0	0	0	0	0	0	0	0	0	0	0	0	0	0	0	0	0
618453	Intellectual Developmental Disorder With Short Stature And Variable Skeletal Anomalies	0	0	0	0	0	0	0	0	0	0	0	0	0	0	0	0	0	0	0
201750	Antley-bixler Syndrome With Genital Anomalies And Disordered Steroidogenesis	0	0	0	0	0	0	0	0	0	0	0	0	0	0	0	0	0	0	0
616816	Hypotonia, Infantile, With Psychomotor Retardation	0	0	0	0	0	0	0	0	0	0	0	0	0	0	0	0	0	0	0
616897	Osteochondrodysplasia, Complex Lethal, Symoens-barnes-gistelinck Type	0	0	0	0	0	0	0	0	0	0	0	0	0	0	0	0	0	0	0
201450	Acyl-coa Dehydrogenase, Medium-chain, Deficiency Of	0	0	0	0	0	0	0	0	0	0	0	0	0	0	0	0	0	0	0
230000	Fucosidosis	0	0	0	0	0	0	0	0	0	0	0	0	0	2	0	0	0	0	0
616299	Lipoyltransferase 1 Deficiency	0	0	0	0	0	0	0	0	0	0	0	0	0	0	0	0	0	0	0
618672	Intellectual Developmental Disorder With Speech Delay, Autism, And Dysmorphic Facies	0	0	0	0	0	0	0	0	0	0	0	0	0	0	0	0	0	0	0
272460	Spondylocarpotarsal Synostosis Syndrome	0	0	0	0	0	0	0	0	0	0	0	0	0	0	0	0	0	0	0
602782	Histiocytosis-lymphadenopathy Plus Syndrome	0	0	0	0	0	0	0	0	0	0	0	0	0	0	0	0	0	0	0
300911	Parkinsonism With Spasticity, X-linked	0	0	0	0	0	0	0	0	0	0	0	0	0	0	0	0	0	0	0
609242	Kanzaki Disease	0	0	0	0	1	0	0	0	0	0	0	0	0	0	0	0	0	0	0
617207	Encephalopathy, Progressive, With Amyotrophy And Optic Atrophy	0	0	0	0	0	0	0	0	0	0	0	0	0	0	0	0	0	0	0
619033	Vissers-bodmer Syndrome	0	0	0	0	0	0	3	0	0	3	0	0	0	0	0	0	0	0	0
616921	Dyskinesia, Limb And Orofacial, Infantile-onset	0	0	0	0	0	0	0	0	0	0	0	0	0	0	0	0	0	0	0
253290	Multiple Pterygium Syndrome, Lethal Type	0	0	0	0	0	0	0	0	0	0	0	0	0	0	0	0	0	0	0
218340	Craniofacial Dysmorphism With Ocular Coloboma, Absent Corpus Callosum,and Aortic Dilatation	0	0	0	0	0	0	0	0	0	0	0	0	0	0	0	0	0	0	0
PS600721	D-2-hydroxyglutaric aciduria	0	0	0	0	0	0	0	0	0	0	0	0	0	0	0	1	0	0	0
PS134600	Fanconi renotubular syndrome	0	0	0	0	0	0	0	0	0	0	0	0	0	0	0	0	0	0	0
613070	Liver Failure, Acute Infantile	0	0	0	0	0	0	0	0	0	0	0	0	0	0	0	0	0	0	0
614065	Myopathy, Distal, 4	0	0	0	0	0	0	0	2	0	0	0	0	0	0	2	3	1	0	1
181430	Scapuloperoneal Myopathy, Myh7-related	0	0	0	0	0	0	0	0	0	0	0	0	0	0	12	4	0	0	16
616803	Lamb-shaffer Syndrome	0	0	0	0	0	0	0	0	0	0	0	0	0	0	0	0	0	0	0
238970	Hyperornithinemia-hyperammonemia-homocitrullinuria Syndrome	0	0	0	0	0	0	0	0	0	0	0	0	0	0	0	0	0	0	0
263800	Gitelman Syndrome	0	0	0	1	0	0	0	0	0	0	0	0	0	0	0	0	0	0	0
246200	Donohue Syndrome	0	0	0	0	0	0	0	0	0	0	1	0	0	0	0	0	0	0	0
272300	Sulfocysteinuria	0	0	0	0	0	0	0	0	1	0	0	0	0	0	0	0	0	0	0
614498	Rigidity And Multifocal Seizure Syndrome, Lethal Neonatal	0	0	0	0	0	0	0	0	0	0	0	0	0	0	0	0	0	0	0
230650	Gm1-gangliosidosis, Type Iii	0	0	0	0	0	0	0	0	0	0	0	0	0	2	0	0	0	0	0
617301	Glycine Encephalopathy With Normal Serum Glycine	0	0	0	0	0	0	0	0	0	0	0	0	0	0	0	0	0	0	0
618879	Neurodevelopmental Disorder With Hypotonia And Cerebellar Atrophy, With Or Without Seizures	0	0	0	0	0	0	0	0	0	0	0	0	0	0	0	0	0	0	0
615217	Ataxia-oculomotor Apraxia 3	0	0	0	0	0	0	0	0	0	0	0	0	0	0	0	0	0	0	0
617668	Encephalopathy, Neonatal Severe, With Lactic Acidosis And Brain Abnormalities	0	0	0	0	0	0	0	0	0	0	0	0	0	0	0	0	0	0	0
612079	Alopecia, Neurologic Defects, And Endocrinopathy Syndrome	0	0	0	0	0	0	0	0	0	0	0	0	0	0	0	0	0	0	0
250100	Metachromatic Leukodystrophy	1	0	0	0	0	0	0	0	1	0	1	2	0	1	0	0	0	0	0
610442	Spondyloepimetaphyseal Dysplasia, Genevieve Type	0	0	0	0	0	0	0	0	0	0	0	0	0	0	0	0	0	0	0
PS613658	Rajab interstitial lung disease with brain calcifications	0	0	0	0	0	0	0	0	0	0	0	0	0	0	0	0	0	0	0
618651	Neurodevelopmental Disorder With Spastic Quadriplegia, Optic Atrophy, Seizures, And Structural Brain Anomalies	0	0	0	0	0	0	0	0	0	0	0	0	0	0	0	0	0	0	0
618022	Humerofemoral Hypoplasia With Radiotibial Ray Deficiency	0	0	0	0	0	0	0	0	0	0	0	0	0	0	0	0	0	0	0
PS610551	Encephalopathy, acute, infection-induced	1	0	0	0	0	0	0	0	0	0	0	0	0	0	0	0	0	1	0
618862	Neurodevelopmental Disorder With Hypotonia, Microcephaly, And Seizures	0	0	0	0	0	0	0	0	0	0	0	0	0	0	0	0	0	0	0
606232	Phelan-mcdermid Syndrome	0	0	0	0	0	0	0	0	0	0	0	0	0	0	0	0	0	0	0
618737	Pachygyria, Microcephaly, Developmental Delay, And Dysmorphic Facies, With Or Without Seizures	0	0	0	0	0	0	0	0	0	0	0	0	0	0	0	0	0	0	0
PS182250	Singleton-Merten syndrome	0	0	0	0	0	0	0	0	0	0	0	0	0	0	0	0	0	0	1
278800	De Sanctis-cacchione Syndrome	0	0	0	0	0	0	0	0	0	0	0	0	0	0	0	0	0	0	0
618971	Tolchin-le Caignec Syndrome	0	0	0	0	0	0	0	0	0	0	0	0	0	0	0	0	0	0	0
619056	Neurodevelopmental Disorder With Speech Impairment And Dysmorphic Facies	0	0	0	0	0	0	0	0	0	0	0	0	0	0	0	0	0	0	0
615465	Hartsfield Syndrome	0	0	0	0	0	0	0	0	0	0	0	0	0	0	0	0	0	0	0
617404	Muscular Dystrophy, Congenital, With Cataracts And Intellectual Disability	0	0	0	0	0	0	0	0	0	0	0	0	0	0	0	0	0	0	0
103050	Adenylosuccinase Deficiency	0	0	0	0	0	0	0	0	0	0	0	0	0	0	0	0	0	0	0
158590	Neuronopathy, Distal Hereditary Motor, Type Iia	0	0	0	0	0	0	0	0	0	0	0	0	0	0	0	0	0	0	0
PS193500	Waardenburg syndrome	0	0	0	0	0	0	0	0	0	0	0	0	0	0	0	0	0	0	0
PS122470	Cornelia de Lange syndrome	0	0	0	0	0	0	0	0	0	0	0	0	0	0	0	1	0	0	0
608013	Gaucher Disease, Perinatal Lethal	0	0	0	0	0	0	0	0	0	0	0	0	0	0	0	0	0	0	0
611105	Leukoencephalopathy With Brainstem And Spinal Cord Involvement Andlactate Elevation	0	0	0	0	0	0	0	0	0	0	0	0	0	0	0	0	0	0	0
618687	Intellectual Developmental Disorder With Short Stature And Behavioral Abnormalities	0	0	0	0	0	0	0	0	0	0	0	0	0	0	0	0	0	0	0
241510	Hypophosphatasia, Childhood	0	0	0	0	0	0	0	0	0	0	0	0	0	0	0	0	0	0	0
309400	Menkes Disease	0	0	0	0	0	0	0	0	0	0	0	0	0	1	0	0	0	0	1
204750	2-@aminoadipic 2-oxoadipic Aciduria	0	0	0	0	0	0	0	0	0	0	0	0	0	0	0	0	0	0	0
PS243310	Baraitser-Winter syndrome	0	0	0	0	0	0	0	0	0	0	0	0	0	0	0	0	0	0	0
170400	Hypokalemic Periodic Paralysis, Type 1	0	0	0	0	0	0	0	1	0	0	0	0	0	0	0	3	0	0	0
610954	Pitt-hopkins Syndrome	0	0	0	0	0	0	0	0	0	0	0	0	0	0	0	0	0	0	0
614325	Pitt-hopkins-like Syndrome 2	0	0	0	0	0	0	0	0	0	0	0	0	0	0	0	0	0	0	0
618414	Myopathy, Congenital, With Fast-twitch (type Ii) Fiber Atrophy	0	0	0	0	0	0	0	0	0	0	0	0	0	0	0	0	0	0	0
PS609192	Loeys-Dietz syndrome	0	0	0	0	0	0	0	0	0	0	0	0	0	0	0	0	1	0	1
PS256300	Nephrotic syndrome	1	0	0	0	0	0	3	0	0	0	0	0	0	0	0	0	0	0	0
236270	Homocystinuria-megaloblastic Anemia Due To Defect In Cobalamin Metabolism,cble Complementation Type	0	0	0	0	0	0	0	0	0	0	0	0	0	0	0	0	0	0	0
271150	Spinal Muscular Atrophy, Type Iv	0	0	0	0	0	0	0	0	0	0	0	0	0	0	0	0	0	0	0
617616	Skraban-deardorff Syndrome	0	0	0	0	0	0	0	0	0	0	0	0	0	0	0	0	0	0	0
614881	Spinal Muscular Atrophy, Distal, Autosomal Recessive, 5	0	0	0	0	0	0	0	1	0	0	0	0	0	0	1	1	0	0	0
617836	Developmental Delay And Seizures With Or Without Movement Abnormalities	0	0	0	0	0	0	0	0	0	0	0	0	0	0	0	0	0	0	0
615934	Sting-associated Vasculopathy, Infantile-onset	0	0	0	0	0	0	0	0	0	0	0	0	0	0	0	0	0	0	0
617977	Neurodevelopmental Disorder With Spastic Quadriplegia And Brain Abnormalities With Or Without Seizures	0	0	0	0	0	0	0	0	0	0	0	0	0	0	0	0	0	0	0
618655	Myopathy, Distal, 6, Adult Onset	0	0	0	0	0	0	0	0	0	0	0	0	0	0	0	2	0	0	0
182290	Smith-magenis Syndrome Smith-magenis Chromosome Region, Included	0	0	0	0	0	0	0	0	0	0	0	0	0	0	0	0	0	0	0
278700	Xeroderma Pigmentosum, Complementation Group A	0	0	0	0	0	0	0	0	0	0	0	0	0	0	0	0	0	0	0
619004	Deeah Syndrome	0	0	0	0	0	0	3	0	0	3	0	0	0	0	0	0	0	0	0
PS231050	Geleophysic dysplasia	0	0	0	0	0	0	0	0	0	0	0	0	0	0	0	0	0	0	0
614300	Hypermethioninemia Due To Adenosine Kinase Deficiency	0	0	0	0	0	0	0	0	0	0	0	0	0	0	0	0	0	0	0
619127	Mandibuloacral Dysplasia Progeroid Syndrome	0	0	0	0	0	0	0	0	0	0	0	0	0	0	0	0	0	0	0
618213	Inflammatory Bowel Disease, Immunodeficiency, And Encephalopathy	0	0	0	0	0	0	0	0	0	0	0	0	0	0	0	0	0	0	0
618218	Baker-gordon Syndrome	0	0	0	0	0	0	0	0	0	0	0	0	0	0	0	0	0	0	0
PS614080	Multiple congenital anomalies-hypotonia-seizures syndrome	0	0	0	0	0	0	0	0	0	0	0	0	0	0	0	0	0	0	0
603358	Gracile Syndrome	0	0	0	0	0	0	0	0	0	0	0	0	0	0	0	0	0	0	0
300489	Spinal Muscular Atrophy, Distal, X-linked 3	0	0	0	0	0	0	0	0	0	0	0	0	0	0	0	0	0	0	0
PS157640	Progressive external ophthalmoplegia with mtDNA deletions	0	0	0	0	0	0	0	1	0	0	0	0	0	1	0	0	0	0	0
605130	Hairy Elbows, Short Stature, Facial Dysmorphism, And Developmentaldelay	0	0	0	0	0	0	0	0	0	0	0	0	0	0	0	0	0	0	0
619125	Kaya-barakat-masson Syndrome	0	0	0	0	0	0	0	0	0	0	0	0	0	0	0	0	0	0	0
260660	Pelviscapular Dysplasia	0	0	0	0	0	0	0	0	0	0	0	0	0	0	0	0	0	0	0
113000	Brachydactyly, Type B1	0	0	0	0	0	0	0	0	0	0	0	0	0	0	0	0	0	0	0
PS605711	Multiple mitochondrial dysfunctions syndrome	0	0	0	0	0	0	0	0	0	0	0	0	0	0	0	0	0	0	0
618929	Agenesis Of Corpus Callosum, Cardiac, Ocular, And Genital Syndrome	0	0	0	0	0	0	0	0	0	0	0	0	0	0	0	0	0	0	0
613376	Neuronopathy, Distal Hereditary Motor, Type Iic	0	0	0	0	0	0	0	0	0	0	0	0	0	0	0	0	0	0	0
619075	Neurodevelopmental Disorder With Alopecia And Brain Abnormalities	0	0	0	0	0	0	0	0	0	0	0	0	0	0	0	0	0	0	0
612387	Sarcoidosis, Susceptibility To, 2	0	0	0	0	0	0	0	0	0	0	0	0	0	0	0	0	0	0	0
612540	Myopathy, Congenital, Compton-north	0	0	0	0	0	0	3	54	2	0	0	0	0	1	14	73	0	0	8
277380	Methylmalonic Aciduria And Homocystinuria, Cblf Type	0	0	0	0	0	0	0	0	0	0	0	0	0	0	0	0	0	0	0
261640	6-@pyruvoyltetrahydropterin Synthase	0	0	0	0	0	0	0	0	0	0	0	0	0	0	0	0	0	0	0
616209	Myopathy, Isolated Mitochondrial, Autosomal Dominant	0	0	0	0	0	0	0	0	0	0	0	0	0	0	0	0	0	0	0
PS105400	Amyotrophic lateral sclerosis	1	0	0	0	0	0	0	11	0	0	0	7	0	3	1	21	0	0	2
617523	Neurodevelopmental Disorder With Midbrain And Hindbrain Malformations	0	0	0	0	0	0	0	0	0	0	0	0	0	0	0	0	0	0	0
PS273750	Three M syndrome	0	0	0	0	0	0	0	0	0	0	0	0	0	0	0	0	0	0	0
232600	Glycogen Storage Disease V	0	0	0	0	0	0	0	2	0	0	0	0	0	0	0	1	0	0	0
PS614594	Olmsted syndrome	0	0	0	0	0	0	0	0	0	0	0	0	0	0	0	0	0	0	1
PS191100	Tuberous sclerosis	0	0	0	1	2	0	0	2	1	1	1	0	1	5	0	4	16	0	2
182980	Spinal Muscular Atrophy, Proximal, Adult, Autosomal Dominantspinal Muscular Atrophy, Late-onset, Finkel Type, Included	0	0	0	0	0	0	0	0	0	0	0	0	0	0	0	0	0	0	0
300717	Myopathy, Reducing Body, X-linked, Early-onset, Severe	0	0	0	0	0	0	0	0	0	0	0	0	0	0	0	0	0	0	0
605039	Bohring-opitz Syndrome	0	0	0	0	0	0	0	0	0	0	0	0	0	0	0	0	0	0	0
601815	Phosphoglycerate Dehydrogenase Deficiency	0	0	0	0	0	0	0	0	0	0	0	0	0	0	0	0	0	0	0
PS607250	Spinocerebellar ataxia, autosomal recessive, with axonal neuropathy	0	0	0	0	0	0	0	0	0	0	0	0	0	0	0	0	0	0	0
125250	Optic Atrophy With Or Without Deafness, Ophthalmoplegia, Myopathy,ataxia, And Neuropathy	0	0	0	0	0	0	0	0	0	0	0	0	0	0	0	0	0	0	0
261750	Glycogen Storage Disease Ixb	0	0	0	0	0	0	0	0	0	0	0	0	0	0	0	0	0	0	0
300695	Scapuloperoneal Myopathy, X-linked Dominant	0	0	0	0	0	0	0	0	0	0	0	0	0	0	0	0	0	0	0
614833	Microcephaly, Short Stature, And Polymicrogyria With Or Without Seizures	0	0	0	0	0	0	0	0	0	0	0	0	0	0	0	0	0	0	0
PS608594	Lipodystrophy, congenital generalized	0	0	0	0	0	0	0	4	0	0	0	0	0	0	0	1	0	0	0
236800	Hydroxykynureninuria	0	0	0	0	0	0	0	0	0	0	0	0	0	0	0	0	0	0	0
601338	Cerebellar Ataxia, Areflexia, Pes Cavus, Optic Atrophy, And Sensorineural Hearing Loss	0	0	0	0	0	0	0	0	0	0	0	0	0	0	0	0	0	0	0
605013	Microhydranencephaly	0	0	0	0	0	0	0	0	0	0	0	0	0	0	0	0	0	0	0
617527	Neurodevelopmental Disorder With Progressive Microcephaly, Spasticity, And Brain Anomalies	0	0	0	0	0	0	0	0	0	0	0	0	0	0	0	0	0	0	0
248500	Mannosidosis, Alpha B, Lysosomal	0	0	0	0	0	0	0	0	0	0	0	0	1	1	0	0	0	0	0
609528	Cerebral Dysgenesis, Neuropathy, Ichthyosis, And Palmoplantar Keratodermasyndrome	0	0	0	0	0	0	0	0	0	0	0	0	0	0	0	0	0	0	0
617173	Intellectual Developmental Disorder With Cardiac Arrhythmia	0	0	0	0	0	0	0	1	0	0	0	0	0	0	0	0	0	0	0
300960	Mend Syndrome	0	0	0	0	0	0	0	0	0	0	0	0	0	0	0	0	0	0	0
618470	Intellectual Developmental Disorder With Severe Speech And Ambulation Defects	0	0	0	0	0	0	0	0	0	0	0	0	0	0	0	0	0	0	0
618810	Pontocerebellar Hypoplasia, Hypotonia, And Respiratory Insufficiency Syndrome, Neonatal Lethal	0	0	0	0	0	0	0	0	0	0	0	0	0	0	0	0	0	0	0
618608	Intellectual Developmental Disorder With Nasal Speech, Dysmorphic Facies, And Variable Skeletal Anomalies	0	0	0	0	0	0	0	0	0	0	0	0	0	0	0	0	0	0	0
226600	Epidermolysis Bullosa Dystrophica, Autosomal Recessive	0	0	0	0	0	0	0	0	0	0	0	1	0	0	0	0	0	0	0
162200	Neurofibromatosis, Type I	0	0	0	0	0	0	0	1	0	14	0	0	1	6	1	0	2	1	2
613406	Chromosome 15q24 Deletion Syndrome	0	0	0	0	0	0	0	0	0	0	0	0	0	0	0	0	0	0	0
616863	Chromosome 16p13.2 Deletion Syndrome	0	0	0	0	0	0	0	0	0	0	0	0	0	0	0	0	0	0	0
602471	Short Stature, Auditory Canal Atresia, Mandibular Hypoplasia, Andskeletal Abnormalities	0	0	0	0	0	0	0	0	0	0	0	0	0	0	0	0	0	0	0
248360	Malonyl-coa Decarboxylase Deficiency	0	0	0	0	0	0	0	0	0	0	0	0	0	0	0	0	0	0	0
156400	Metaphyseal Chondrodysplasia, Jansen Type	0	0	0	0	0	0	0	0	0	0	0	0	0	0	0	0	0	0	0
PS126200	Multiple sclerosis, susceptibility to	2	6	4	0	0	1	0	1	1	2	0	1	0	1	0	0	0	7	0
612674	Polyneuropathy, Hearing Loss, Ataxia, Retinitis Pigmentosa, And Cataract	0	0	0	0	0	0	0	0	0	0	0	0	0	0	0	0	0	0	0
616266	Congenital Contractures Of The Limbs And Face, Hypotonia, And Developmental Delay	0	0	0	0	0	0	0	0	0	0	0	0	0	0	0	0	0	0	0
617011	Macrocephaly, Dysmorphic Facies, And Psychomotor Retardation	0	0	0	0	0	0	0	0	0	0	0	0	0	0	0	0	0	0	0
617675	Myopathy, Mitochondrial, And Ataxia	0	0	0	0	0	0	0	0	0	0	0	0	0	1	0	0	0	0	0
617180	Chitayat Syndrome	0	0	0	0	0	0	0	0	0	0	0	0	0	1	0	0	1	0	0
300200	Adrenal Hypoplasia, Congenital	0	0	0	0	0	0	0	0	0	0	0	0	0	0	0	0	0	0	0
613735	Chromosome 1p32-p31 Deletion Syndrome	0	0	0	0	0	0	0	0	0	0	0	0	0	0	0	0	0	0	0
618569	Neurodevelopmental Disorder With Ataxia, Hypotonia, And Microcephaly	0	0	0	0	0	0	0	0	0	0	0	0	0	0	0	0	0	0	0
137200	Neuromyotonia And Axonal Neuropathy, Autosomal Recessive	0	0	0	0	0	0	0	2	0	0	0	0	0	0	0	0	0	0	1
200700	Chondrodysplasia, Grebe Type	0	0	0	0	0	0	0	0	0	0	0	0	0	0	0	0	0	0	0
PS230400	Galactosemia	2	0	0	0	0	0	5	0	0	0	0	0	0	17	0	0	0	0	1
301040	Alpha-thalassemia/mental Retardation Syndrome, Nondeletion Type, X-linked	0	0	0	0	0	0	0	0	0	0	0	0	0	0	1	0	0	0	0
PS607095	Anauxetic dysplasia	0	0	0	0	0	0	0	0	0	0	0	0	0	0	0	0	0	0	0
615960	Poretti-boltshauser Syndrome	0	0	0	0	0	0	0	0	0	0	0	0	0	0	0	0	0	0	0
PS311200	Orofaciodigital syndrome	0	0	0	0	0	0	0	0	0	0	0	0	0	0	0	0	0	0	1
600348	Band Heterotopia	0	0	0	0	0	0	0	0	0	0	0	0	0	0	0	0	0	0	0
605407	Segawa Syndrome, Autosomal Recessive	0	0	0	0	0	0	0	0	0	0	0	0	0	0	0	0	0	0	0
618158	Intellectual Developmental Disorder With Macrocephaly, Seizures, And Speech Delay	0	0	0	0	0	0	0	0	0	0	0	0	0	0	0	0	0	0	0
PS616866	Spinal muscular atrophy with congenital bone fractures	0	0	0	0	0	0	0	0	0	0	0	0	0	0	0	0	0	0	0
181400	Scapuloperoneal Syndrome, Neurogenic, Kaeser Type	0	0	0	0	0	0	0	0	0	0	0	0	0	0	0	0	0	0	0
222448	Donnai-barrow Syndrome	0	0	0	0	0	0	0	0	0	0	0	0	0	0	0	0	0	0	0
252940	Mucopolysaccharidosis Type Iiid	0	0	0	0	0	0	0	0	0	0	0	0	0	4	0	0	0	0	0
266500	Refsum Disease	0	0	0	0	0	0	0	0	0	0	0	0	0	0	0	0	1	0	0
611721	Combined Saposin Deficiency	0	0	0	0	0	0	0	0	0	0	0	0	0	0	0	0	0	0	0
PS166200	Osteogenesis imperfecta	0	0	0	0	0	0	0	0	0	0	0	29	0	1	0	1	0	0	17
618741	Neurodevelopmental Disorder With Epilepsy, Spasticity, And Brain Atrophy	0	0	0	0	0	0	0	0	0	0	0	0	0	0	0	0	0	0	0
613398	Warsaw Breakage Syndrome	0	1	1	0	0	0	0	0	0	0	0	0	0	0	0	0	1	0	0
614756	Cerebellar Ataxia, Nonprogressive, With Mental Retardation	0	0	0	0	0	0	0	0	0	0	0	0	0	0	0	0	0	0	0
617159	Sifrim-hitz-weiss Syndrome	0	0	0	0	0	0	0	0	0	0	0	0	0	0	0	0	0	0	0
618367	Neurodevelopmental Disorder With Microcephaly, Epilepsy, And Hypomyelination	0	0	0	0	0	0	0	0	0	0	0	0	0	0	0	0	0	0	0
307030	Glycerol Kinase Deficiency	0	0	0	0	0	0	0	3	1	0	0	0	0	0	0	2	0	0	0
269920	Infantile Sialic Acid Storage Disorder	0	0	0	0	0	0	1	0	0	0	0	0	0	3	0	0	0	0	0
617030	Myopathy, Distal, 5	0	0	0	0	0	0	0	3	0	0	0	0	0	0	1	5	1	0	1
PS236680	Hydrolethalus syndrome	0	0	0	0	0	0	0	0	0	0	0	0	0	0	0	0	0	0	0
618460	Khan-khan-katsanis Syndrome	0	0	0	0	0	0	3	0	0	3	0	0	0	0	0	0	0	0	0
162210	Neurofibromatosis, Familial Spinal	0	0	0	0	0	0	0	0	0	0	0	0	0	0	0	0	0	0	0
PS606777	Glut1 deficiency syndrome	0	0	0	0	0	0	0	0	0	0	0	0	0	0	0	0	0	0	0
618863	Retinal Dystrophy With Leukodystrophy	0	0	0	0	0	0	0	0	0	0	0	0	0	0	0	0	0	0	0
PS606176	Diabetes mellitus, permanent neonatal	0	0	0	0	0	0	0	0	0	0	0	0	0	0	0	0	0	0	0
618425	Neurodevelopmental Disorder With Impaired Speech And Hyperkinetic Movements	0	0	0	0	0	0	0	0	0	0	0	0	0	0	0	0	0	0	0
617507	Peho-like Syndrome	0	0	0	0	0	0	0	0	0	0	0	0	0	0	0	0	0	0	0
PS271640	Spondyloepimetaphyseal dysplasia with joint laxity	0	0	0	0	0	0	0	0	0	0	0	0	0	0	0	0	0	0	0
PS605253	Neuropathy, congenital hypomelinating	0	0	0	0	0	0	0	0	0	0	0	0	0	0	0	0	0	0	0
605726	Spinal Muscular Atrophy, Distal, Autosomal Recessive, 2	0	0	0	0	0	0	0	0	0	0	0	0	0	0	0	0	0	0	0
603472	Neuronal Intranuclear Inclusion Disease	0	0	0	0	0	0	0	0	0	0	0	0	0	0	0	0	0	0	1
PS312080	Leukodystrophy, hypomyelinating	0	0	0	0	0	0	0	0	0	0	0	0	0	0	0	0	0	0	0
PS105550	Frontotemporal dementia and/or Amyotrophic Lateral Sclerosis	1	0	0	0	0	0	0	7	0	0	0	2	0	1	0	14	0	0	1
168400	Parastremmatic Dwarfism	0	0	0	0	0	0	0	0	0	0	0	0	0	0	0	0	0	0	0
212140	Carnitine Deficiency, Systemic Primary	0	0	0	0	0	0	0	1	0	0	0	0	0	0	0	0	0	0	0
PS257920	3MC syndrome	0	0	0	0	0	0	0	0	0	0	0	0	0	0	0	0	0	0	0
617672	Neurodegeneration, Childhood-onset, With Brain Atrophy	0	0	0	0	0	0	0	0	0	0	0	0	0	0	0	0	0	0	0
618175	Warburg-cinotti Syndrome	0	0	0	0	0	0	0	0	0	0	0	0	0	0	0	0	0	0	0
616034	2,4-@dienoyl-coa Reductase Deficiency	5	0	0	8	0	1	22	4	5	0	0	0	0	4	1	0	6	1	1
121300	Coproporphyria	0	0	0	0	0	0	0	0	0	0	0	0	0	0	0	0	0	0	0
608390	Myotonia, Potassium-aggravated	0	0	0	0	0	0	0	10	0	0	0	0	0	0	0	7	0	0	0
618505	Neurodevelopmental Disorder With Coarse Facies And Mild Distal Skeletal Abnormalities	0	0	0	0	0	0	0	0	0	0	0	0	0	0	0	0	0	0	0
260565	Peho Syndrome	0	0	0	0	0	0	0	0	0	0	0	0	0	0	0	0	0	0	0
608837	Carney Complex Variant	0	0	0	0	0	0	0	0	0	0	0	0	0	0	0	0	0	0	0
613668	Microcephaly, Postnatal Progressive, With Seizures And Brain Atrophy	0	0	0	0	0	0	0	0	0	0	0	0	0	0	0	0	0	0	0
PS214450	Griscelli syndrome	0	0	0	0	0	0	0	0	0	0	1	0	0	0	0	0	0	2	0
105210	Amyloidosis, Hereditary, Transthyretin-related	0	0	0	0	0	0	0	0	0	0	0	0	0	0	0	0	0	0	0
117000	Central Core Disease Of Muscle	0	0	0	0	0	0	0	3	0	0	0	0	0	1	0	7	3	0	3
158580	Neuronopathy, Distal Hereditary Motor, Type Viia	0	0	0	0	0	0	0	0	0	0	0	0	0	0	0	0	0	0	0
300280	Uruguay Faciocardiomusculoskeletal Syndrome	0	0	0	0	0	0	0	0	0	0	0	0	0	0	0	0	0	0	0
607236	Hypoprebetalipoproteinemia, Acanthocytosis, Retinitis Pigmentosa,and Pallidal Degeneration	0	0	0	0	0	0	0	0	0	0	0	0	0	0	0	0	0	0	0
300673	Encephalopathy, Neonatal Severe, Due To Mecp2 Mutations	0	0	0	0	0	0	0	0	0	0	0	0	0	0	0	0	0	0	0
200150	Choreoacanthocytosis	0	0	0	0	0	0	2	0	0	0	0	0	0	0	0	0	0	0	0
176270	Prader-willi Syndrome	0	0	0	0	0	0	0	0	0	0	0	0	0	0	0	0	0	0	0
100800	Achondroplasia	0	0	0	0	0	0	0	0	0	0	0	2	0	0	0	0	0	0	8
PS253600	Muscular dystrophy, limb-girdle, autosomal recessive	0	0	0	0	0	0	0	1	0	0	0	0	0	0	4	3	0	0	0
273395	Tetra-amelia, Autosomal Recessive	0	0	0	0	0	0	0	0	0	0	0	0	0	0	0	0	0	0	0
117650	Cerebrocostomandibular Syndrome	0	0	0	0	0	0	0	0	0	0	0	0	0	0	0	0	0	0	0
253400	Spinal Muscular Atrophy, Type Iii	0	0	0	0	0	0	0	4	0	0	0	0	0	0	1	3	0	0	0
611556	Glycogen Storage Disease 0, Muscle	0	0	0	0	0	0	0	0	0	0	0	0	0	0	0	0	0	0	0
613163	Gaba-transaminase Deficiency	0	0	0	0	0	0	0	0	0	0	0	0	0	0	0	0	0	0	0
PS208150	Fetal akinesia deformation sequence	0	0	0	0	0	0	0	0	0	0	0	0	0	0	0	0	0	0	0
300244	Terminal Osseous Dysplasia	0	0	0	0	0	0	0	0	0	0	0	0	0	0	0	0	0	0	0
215470	Boucher-neuhauser Syndrome	0	0	0	0	0	0	0	0	0	0	0	0	0	0	0	0	0	0	0
618497	Neurodevelopmental Disorder With Seizures And Nonepileptic Hyperkinetic Movements	0	0	0	0	0	0	0	0	0	0	0	0	0	0	0	0	0	0	0
618730	Neurodevelopmental Disorder With Microcephaly, Cortical Malformations, And Spasticity	0	0	0	0	0	0	0	0	0	0	0	0	0	0	0	0	0	0	0
PS259700	Osteopetrosis, autosomal recessive	0	0	0	0	0	0	0	0	0	0	0	0	0	0	0	0	0	0	0
618891	Microcephaly, Developmental Delay, And Brittle Hair Syndrome	0	0	0	0	0	0	0	0	0	0	0	0	0	0	0	0	0	0	0
PS220110	Mitochondrial complex IV deficiency, nuclear-type	0	0	0	0	0	0	0	0	0	0	0	0	0	0	0	0	0	0	0
617146	Arthrogryposis, Distal, With Impaired Proprioception And Touch	0	0	0	0	0	0	0	0	0	0	0	0	0	0	0	0	0	0	0
618371	Turnpenny-fry Syndrome	0	0	0	0	0	0	0	0	0	0	0	0	0	0	0	0	0	0	0
616281	Mental Retardation, Autosomal Recessive 49	0	0	0	0	0	0	0	0	0	0	0	0	0	0	0	0	0	0	0
240800	Hypoglycemia Of Infancy, Leucine-sensitive	0	0	0	0	0	0	0	0	0	0	0	0	0	0	0	0	0	0	0
255100	Lipid Storage Myopathy Due To Flavin Adenine Dinucleotide Synthetase Deficiency	0	0	0	0	0	0	0	0	0	0	0	0	0	0	0	0	0	0	0
278730	Xeroderma Pigmentosum, Complementation Group D	0	0	0	0	0	0	0	0	0	0	0	0	0	0	0	0	0	0	0
619026	Neurodevelopmental Disorder With Progressive Spasticity And Brain White Matter Abnormalities	0	0	0	0	0	0	0	0	0	0	0	0	0	0	0	0	0	0	0
618143	Glycosylphosphatidylinositol Biosynthesis Defect 18	0	0	0	0	0	0	0	0	0	0	0	0	0	0	0	0	0	0	0
619112	Neuropathy, Distal Hereditary Motor, Type Vc	0	0	0	0	0	0	0	0	0	0	0	0	0	0	0	0	0	0	0
251900	Mitochondrial Myopathy, Episodic, With Optic Atrophy And Reversible Leukoencephalopathy	0	0	0	0	0	0	0	0	0	0	0	0	0	0	0	0	0	0	0
265900	Pyle Disease	0	0	0	0	0	0	0	0	0	0	0	0	0	0	0	0	0	0	0
267000	Perlman Syndrome	0	0	0	0	0	0	0	0	0	0	0	0	0	0	0	0	0	0	0
PS176670	Progeria	3	0	0	3	0	1	0	0	0	0	0	2	0	0	3	2	13	0	0
618164	Cardiac, Facial, And Digital Anomalies With Developmental Delay	0	0	0	0	0	0	0	0	0	0	0	0	0	0	0	0	0	0	0
261740	Glycogen Storage Disease Of Heart, Lethal Congenital	0	0	0	0	0	0	0	0	0	0	0	0	0	0	1	0	0	0	0
614321	Myopathy, Distal, Tateyama Type	0	0	0	0	0	0	0	0	0	0	0	0	0	0	1	0	0	0	0
255120	Carnitine Palmitoyltransferase I Deficiency	0	0	0	0	0	0	0	0	0	0	0	0	0	0	0	0	0	0	0
618653	Intellectual Developmental Disorder With Impaired Language And Dysmorphic Facies	0	0	0	0	0	0	0	0	0	0	0	0	0	0	0	0	0	0	0
616763	Leukodystrophy And Acquired Microcephaly With Or Without Dystonia	0	0	0	0	0	0	0	0	0	0	0	0	0	0	0	0	0	0	0
166700	Buschke-ollendorff Syndrome	0	0	0	0	0	0	0	0	0	0	0	0	0	0	0	0	0	0	0
105500	Amyotrophic Lateral Sclerosis-parkinsonism/dementia Complex 1	1	0	0	0	0	0	0	11	0	0	0	7	0	3	1	21	0	0	2
208920	Ataxia, Early-onset, With Oculomotor Apraxia And Hypoalbuminemia	0	0	0	0	0	0	0	0	0	0	0	0	0	0	0	0	0	0	0
PS209850	Autism, susceptiblity to	0	0	0	0	0	0	0	0	0	0	0	0	0	0	0	0	0	0	0
275350	Transcobalamin Ii Deficiency	0	0	0	0	0	0	0	0	0	0	0	0	0	0	0	0	0	0	0
618822	Myopathy, Congenital, With Respiratory Insufficiency And Bone Fractures	0	0	0	0	0	0	0	0	0	0	0	0	0	0	0	0	0	0	0
309000	Lowe Oculocerebrorenal Syndrome	0	0	0	0	0	0	0	0	0	0	0	0	0	0	0	0	0	0	0
PS165500	Optic atrophy	0	0	0	0	0	0	0	4	0	0	0	2	0	3	0	1	1	0	2
618480	Neurodevelopmental Disorder With Seizures And Speech And Walking Impairment	0	0	0	0	0	0	0	0	0	0	0	0	0	0	0	0	0	0	0
617190	Shashi-pena Syndrome	0	0	0	0	0	0	0	0	0	0	0	0	0	0	0	0	0	0	0
PS117550	Sotos syndrome	0	0	0	0	0	0	0	0	0	0	0	0	0	0	0	0	0	0	0
615485	Bainbridge-ropers Syndrome	0	0	0	0	0	0	0	0	0	0	0	0	0	0	0	0	0	0	0
207410	Antley-bixler Syndrome Without Genital Anomalies Or Disordered Steroidogenesis	0	0	0	0	0	0	0	0	0	0	0	0	0	0	0	0	0	0	0
617602	Congenital Heart Defects And Skeletal Malformations Syndrome	0	0	0	0	0	0	0	1	1	0	0	0	0	0	1	1	0	0	1
600081	25-@hydroxyvitamin D3 Deficiency, Selective	0	0	0	0	0	0	0	0	0	0	0	0	0	0	0	0	0	0	0
601238	Cerebellar Ataxia, Cayman Type	0	0	0	0	0	0	0	0	0	0	0	0	0	0	0	0	0	0	0
602771	Rigid Spine Muscular Dystrophy 1	0	0	0	0	0	0	0	0	0	0	0	0	0	0	2	0	0	0	0
605822	Spondyloocular Syndrome	0	0	0	0	0	0	0	0	0	0	0	0	0	0	0	0	0	0	0
185070	Stormorken Syndrome	0	0	0	0	0	0	0	0	0	0	0	0	0	0	0	0	0	0	0
617425	Immunoskeletal Dysplasia With Neurodevelopmental Abnormalities	0	0	0	0	0	0	0	0	0	0	0	0	0	0	0	0	0	0	0
245800	Laurence-moon Syndrome	0	0	0	0	0	0	0	0	0	0	0	0	0	0	0	0	0	0	0
100100	Abdominal Muscles, Absence Of, With Urinary Tract Abnormality Andcryptorchidism	0	0	0	0	0	0	0	0	0	0	0	0	0	0	0	0	0	0	0
613345	Hypokalemic Periodic Paralysis, Type 2	0	0	0	0	0	0	0	2	0	0	0	0	0	0	0	1	0	0	0
618761	Catifa Syndrome	0	0	0	0	0	0	0	0	0	0	0	0	0	0	0	0	0	0	0
PS310300	Emery-Dreifuss muscular dystrophy	0	0	0	0	0	0	0	0	0	0	0	0	0	0	12	4	0	0	16
225790	Proliferative Vasculopathy And Hydranencephaly-hydrocephaly Syndrome	0	0	0	0	0	0	0	0	0	0	0	0	0	1	0	0	0	0	0
255310	Myopathy, Congenital, With Fiber-type Disproportion	0	0	0	0	0	0	0	27	0	0	0	0	0	0	5	41	0	0	1
133020	Erythermalgia, Primary	0	0	0	0	0	0	0	1	0	0	0	0	0	0	0	1	0	0	0
170500	Hyperkalemic Periodic Paralysis	0	0	0	0	0	0	0	15	0	0	0	0	0	0	0	14	0	0	0
PS614039	Cortical dysplasia, complex, with other brain malformations	0	0	0	0	0	0	0	0	0	0	0	0	0	0	0	0	0	0	0
272800	Tay-sachs Disease	0	0	0	0	0	0	0	0	0	0	0	0	0	2	0	0	0	0	0
610717	Neutral Lipid Storage Disease With Myopathy	0	0	0	0	0	0	0	1	0	0	0	0	0	0	0	0	0	0	0
614751	Neuronopathy, Distal Hereditary Motor, Type Vb	0	0	0	0	0	0	0	0	0	0	0	0	0	0	0	0	0	0	0
PS614937	Myoclonus, Familial	0	0	0	0	0	0	0	0	0	0	0	0	0	0	0	0	0	0	0
609313	Mental Retardation, Enteropathy, Deafness, Peripheral Neuropathy,ichthyosis, And Keratoderma	0	0	0	0	0	0	0	0	0	0	0	0	0	0	0	0	0	0	0
142900	Holt-oram Syndrome	0	0	0	0	0	0	0	0	0	0	0	0	0	0	0	0	0	0	2
PS214150	Cerebrooculofacioskeletal syndrome	0	0	0	0	0	0	0	0	0	0	0	0	0	0	0	0	0	0	0
PS271930	Striatonigral degeneration	0	0	0	0	0	0	0	0	0	0	0	0	0	0	0	0	0	0	0
618654	Myopathy, Congenital With Structured Cores And Z-line Abnormalities	0	0	0	0	0	0	0	0	0	0	0	0	0	0	0	0	0	0	0
PS256850	Giant axonal neuropathy	0	0	0	0	1	0	0	0	0	0	0	0	0	1	0	1	0	0	1
221820	Leukoencephalopathy, Diffuse Hereditary, With Spheroids	0	0	0	0	0	0	0	0	0	0	0	0	0	0	0	0	0	0	0
608022	Diaphanospondylodysostosis	0	0	0	0	0	0	0	0	0	0	0	0	0	0	0	0	0	0	0
616531	Polymicrogyria, Perisylvian, With Cerebellar Hypoplasia And Arthrogryposis	0	0	0	0	0	0	0	0	0	0	0	0	0	0	0	0	0	0	0
PS193100	Hypophosphatemic rickets	0	0	0	0	0	0	0	0	0	0	0	0	0	0	0	0	0	0	6
615273	Congenital Disorder Of Deglycosylation	0	0	0	0	0	0	0	0	0	0	0	0	0	0	0	0	0	0	0
305600	Focal Dermal Hypoplasia	0	0	0	0	0	0	0	0	0	0	0	0	0	0	0	0	0	0	0
160500	Myopathy, Distal 1	0	0	0	0	0	0	0	6	0	0	0	0	0	0	1	14	0	0	2
618914	Neurodevelopmental, Jaw, Eye, And Digital Syndrome	0	0	0	0	0	0	0	0	0	0	0	0	0	0	0	0	0	0	0
PS312170	Pyruvate dehydrogenase complex deficiency	0	0	0	0	0	0	0	2	0	0	0	0	0	0	0	1	0	0	0
220120	D-glyceric Aciduria	0	0	0	0	0	0	0	0	0	0	0	0	0	0	0	0	0	0	0
604121	Cerebellar Ataxia, Deafness, And Narcolepsy, Autosomal Dominant	0	0	0	0	0	0	0	0	0	0	0	0	0	0	0	0	0	0	0
607539	Camptosynpolydactyly, Complex	0	0	0	0	0	0	0	0	0	0	0	0	0	0	0	0	0	0	0
PS607721	Noonan syndrome-like disorder with loose anagen hair	0	0	0	0	0	0	0	0	0	0	0	0	0	0	0	0	0	0	0
617682	Pilarowski-bjornsson Syndrome	0	0	0	0	0	0	0	0	0	0	0	0	0	0	0	0	0	0	0
PS160565	Myopathy, tubular aggregate	0	0	0	0	0	0	0	24	0	0	0	0	0	0	5	38	0	0	0
259050	Primrose Syndrome	0	0	0	0	0	0	0	0	0	0	0	0	0	0	0	0	0	0	0
261540	Peters-plus Syndrome	0	0	0	0	0	0	0	0	0	0	0	0	0	0	0	0	0	0	0
618659	Neurodevelopmental Disorder With Dysmorphic Facies And Distal Skeletal Anomalies	0	0	0	0	0	0	0	0	0	0	0	0	0	0	0	0	0	0	0
241500	Hypophosphatasia, Infantile	0	0	0	0	0	0	0	0	0	0	0	0	0	0	0	0	0	0	0
PS224690	Meier-Gorlin syndrome	0	0	0	0	0	0	0	0	0	0	0	0	0	0	0	0	0	0	0
615474	Primary Aldosteronism, Seizures, And Neurologic Abnormalities	0	0	0	0	0	0	0	0	0	0	0	0	0	0	0	0	0	0	0
611705	Myopathy, Early-onset, With Fatal Cardiomyopathy	0	0	0	0	0	0	0	0	0	0	0	0	0	0	0	0	0	0	0
PS130000	Ehlers-Danlos syndrome	0	0	0	0	0	0	0	0	0	4	0	1	0	0	0	0	0	0	13
253270	Holocarboxylase Synthetase Deficiency	0	0	0	0	0	0	0	0	0	0	0	0	0	0	0	0	0	0	0
608643	Aromatic L-amino Acid Decarboxylase Deficiency	0	0	0	0	0	0	0	0	0	0	0	0	0	0	0	0	0	0	0
618578	Myopathy, Congenital, Progressive, With Scoliosis	0	0	0	0	0	0	0	0	0	0	0	0	0	0	2	0	0	0	0
PS160120	Episodic ataxia	0	0	0	0	0	0	0	1	0	0	0	0	0	0	0	0	0	0	0
618917	Neurodevelopmental Disorder With Language Impairment And Behavioral Abnormalities	0	0	0	0	0	0	0	0	0	0	0	0	0	0	0	0	0	0	0
610042	Cortical Dysplasia-focal Epilepsy Syndrome	0	0	0	0	0	0	0	0	0	0	0	0	0	0	0	0	0	0	0
617762	Leukodystrophy, Progressive, Early Childhood-onset	0	0	0	0	0	0	0	0	0	0	0	0	0	0	0	0	0	0	0
601559	Stuve-wiedemann Syndrome	0	0	0	0	0	0	0	0	0	0	0	0	0	0	0	0	0	0	0
614399	Myopathy, Areflexia, Respiratory Distress, And Dysphagia, Early-onset	0	0	0	0	0	0	0	0	0	0	0	0	0	0	3	0	0	0	0
258870	Ornithine Aminotransferase Deficiency	0	0	0	0	0	0	0	0	0	0	0	0	0	0	0	0	0	0	0
PS179800	Distal renal tubular acidosis	0	0	0	0	0	0	2	0	0	0	0	0	0	0	0	0	0	0	0
PS215100	Rhizomelic chondrodysplasia punctata	0	0	0	0	0	0	0	0	0	0	0	0	0	0	0	0	0	0	0
265380	Alveolar Capillary Dysplasia With Misalignment Of Pulmonary Veins	5	0	0	7	1	1	0	0	0	0	0	0	0	1	0	0	5	0	0
617140	Zttk Syndrome	0	0	0	0	0	0	0	0	0	0	0	0	0	0	0	0	0	0	0
617171	Dyskinesia, Seizures, And Intellectual Developmental Disorder	0	0	0	0	0	0	0	0	0	0	0	0	0	0	0	0	0	0	0
255700	Myotonia Congenita, Autosomal Recessive	0	0	0	0	0	0	3	31	0	0	0	0	0	0	2	29	0	0	0
617991	Developmental Delay, Intellectual Disability, Obesity, And Dysmorphic Features	0	0	0	0	0	0	0	0	0	0	0	0	0	0	0	0	0	0	0
PS268000	Retinitis pigmentosa	0	0	0	0	0	0	1	0	0	0	0	4	0	2	1	0	0	0	0
259450	Bruck Syndrome 1	0	0	0	0	0	0	0	0	0	0	0	0	0	0	0	0	0	0	0
615926	Webb-dattani Syndrome	0	0	0	0	0	0	3	0	0	3	0	0	0	0	0	0	0	0	0
140000	Hand-foot-uterus Syndrome	0	0	0	0	0	0	0	0	0	0	0	0	0	0	0	0	0	0	0
PS235510	Hennekam lymphangiectasia-lymphedema syndrome	0	0	0	0	2	0	0	0	0	0	0	0	0	0	0	0	0	0	0
PS607426	Coenzyme Q10 deficiency, primary	0	0	0	0	0	0	0	0	0	0	0	0	0	0	0	0	0	0	0
300373	Osteopathia Striata With Cranial Sclerosis	0	0	0	0	0	0	0	0	0	0	0	0	0	0	0	0	0	0	0
619076	Neurodevelopmental Disorder With Microcephaly, Seizures, And Brain Atrophy	0	0	0	0	0	0	0	0	0	0	0	0	0	0	0	0	0	0	0
PS300352	Cerebral creatine deficiency syndrome	0	0	0	0	0	0	0	0	0	0	0	0	0	1	1	0	0	0	0
602541	Muscular Dystrophy, Congenital, Megaconial Type	0	0	0	0	0	0	0	0	0	0	0	0	0	0	0	0	0	0	0
617820	Neurodevelopmental Disorder With Or Without Hyperkinetic Movements And Seizures, Autosomal Recessive	0	0	0	0	0	0	0	0	0	0	0	0	0	0	0	0	0	0	0
PS615438	Infantile liver failure syndrome	0	0	0	0	0	0	0	0	0	0	0	0	0	0	0	0	0	0	0
133540	Cockayne Syndrome, Type B	0	0	0	0	0	0	0	0	0	0	0	0	0	0	0	0	0	0	0
300855	Ogden Syndrome	0	0	0	0	0	0	0	0	0	0	0	0	0	0	0	0	0	0	1
618637	Oculopharyngeal Myopathy With Leukoencephalopathy 1	0	0	0	0	0	0	0	0	0	0	0	0	0	0	0	0	0	0	0
615760	Microcephaly, Progressive, With Seizures And Cerebral And Cerebellaratrophy	0	0	0	0	0	0	0	0	0	0	0	0	0	0	0	0	0	0	0
618170	Neurodegeneration, Childhood-onset, Stress-induced, With Variable Ataxia And Seizures	0	0	0	0	0	0	0	0	0	0	0	0	0	0	0	0	0	0	0
PS276300	Mismatch repair cancer syndrome	0	0	0	0	0	0	0	0	0	0	0	0	0	0	0	0	0	0	0
175700	Greig Cephalopolysyndactyly Syndrome	0	0	0	0	0	0	0	0	0	0	0	0	0	0	0	0	0	0	0
613470	Hemolytic Anemia, Nonspherocytic, Due To Glucose Phosphate Isomerase	0	0	0	0	0	0	5	0	0	0	0	0	0	0	0	0	0	0	0
255160	Myopathy, Myosin Storage, Autosomal Recessive	0	0	0	0	0	0	0	0	0	0	0	0	0	0	0	0	0	0	0
259600	Multicentric Osteolysis, Nodulosis, And Arthropathy	0	0	0	0	0	0	0	0	0	0	0	0	0	0	0	0	0	0	0
616580	Au-kline Syndrome	0	0	0	0	0	0	0	0	0	0	0	0	0	0	0	0	0	0	0
300438	Hsd10 Mitochondrial Disease	0	0	0	0	0	0	0	0	0	0	0	0	0	0	0	0	0	0	0
PS213600	Basal ganglia calcification, idiopathic	1	0	0	0	0	0	0	0	0	0	0	0	0	2	0	0	0	0	0
149730	Lacrimoauriculodentodigital Syndrome	0	0	0	0	0	0	0	0	0	0	0	0	0	0	0	0	0	0	0
PS604004	Leukoencephalopathy, megalencephalic	0	0	0	0	0	0	0	0	0	0	0	0	0	0	0	0	0	0	0
604369	Sialuria, Finnish Type	0	0	0	0	0	0	1	0	0	0	0	0	0	3	0	0	0	0	0
601005	Timothy Syndrome	0	0	0	0	0	0	0	0	0	0	0	0	0	0	0	0	0	0	0
614098	Keppen-lubinsky Syndrome	0	0	0	0	0	0	0	0	0	0	0	0	0	0	0	0	0	0	0
609446	Paroxysmal Nonkinesigenic Dyskinesia, 3, With Or Without Generalized Epilepsy	0	0	0	0	0	0	0	0	0	0	0	0	0	0	0	0	0	0	0
605637	Myopathy, Proximal, And Ophthalmoplegia	0	0	0	0	0	0	0	0	0	0	0	0	0	0	0	3	0	0	0
PS166780	Otofaciocervical syndrome	0	0	0	0	0	0	0	0	0	0	0	0	0	0	0	0	0	0	0
PS221770	Polycystic lipomembranous osteodysplasia with sclerosing leukoencephaly	0	0	0	0	0	0	0	0	0	0	0	0	0	0	0	0	0	0	0
216550	Cohen Syndrome	0	0	0	0	0	0	0	0	0	0	0	0	0	0	0	0	0	0	0
231070	Geroderma Osteodysplastica	0	0	0	0	0	0	0	0	0	0	0	0	0	0	0	0	0	0	0
606854	Polymicrogyria, Bilateral Frontoparietal	0	0	0	0	0	0	0	0	0	0	1	0	0	0	0	0	0	0	0
613845	Hyperuricemia, Pulmonary Hypertension, Renal Failure, And Alkalosis	0	0	0	0	0	0	0	0	0	0	0	0	0	0	0	0	0	0	0
271900	Canavan Disease	0	0	0	0	0	0	0	0	0	0	0	0	0	0	0	0	0	0	0
617290	Epilepsy, Early-onset, Vitamin B6-dependent	0	0	0	0	0	0	0	0	0	0	0	0	0	0	0	0	0	0	0
617810	Glycosylphosphatidylinositol Biosynthesis Defect 15	0	0	0	0	0	0	0	0	0	0	0	0	0	0	0	0	0	0	0
PS618005	Congenital disorder of glycosylation with defective fucosylation	0	0	0	0	0	0	0	0	0	0	0	0	0	0	0	0	0	0	0
130720	Lateral Meningocele Syndrome	0	0	0	0	0	0	0	0	0	0	0	0	0	0	0	0	0	0	0
PS225750	Aicardi-Goutieres syndrome	0	0	0	0	0	0	0	0	0	0	0	0	0	1	0	0	0	0	0
310440	Myopathy, X-linked, With Excessive Autophagy	0	0	0	0	0	0	0	0	0	0	0	0	0	0	0	0	0	0	0
PS161800	Nemaline myopathy	0	0	0	0	0	0	0	19	0	0	0	0	0	0	1	32	0	0	1
PS272430	Cold-induced sweating syndrome	0	0	0	0	0	0	0	0	0	0	0	0	0	0	0	0	0	0	0
274400	Thyroid Hormonogenesis, Genetic Defect In, 1	0	0	0	0	0	0	0	0	0	0	0	0	0	0	0	0	0	0	0
603543	Limb-mammary Syndrome	0	0	0	0	0	0	0	0	0	0	0	0	0	0	0	0	0	0	0
609056	Amish Infantile Epilepsy Syndrome	0	0	0	0	0	0	0	0	0	0	0	0	0	0	0	0	0	0	0
615048	Spinal Muscular Atrophy, Jokela Type	0	0	0	0	0	0	0	0	0	0	0	0	0	0	0	0	0	0	0
PS108600	Spastic ataxia	0	0	0	0	0	0	0	0	0	0	0	0	0	0	0	0	0	0	1
263700	Porphyria, Congenital Erythropoietic	0	0	0	0	0	0	3	0	0	0	0	0	0	0	0	0	0	0	0
251110	Methylmalonic Aciduria, Cblb Type	0	0	0	0	0	0	0	0	0	0	0	0	0	0	0	0	0	0	0
PS607596	Pontocerebellar hypoplasia	0	0	0	0	0	0	0	0	0	0	0	0	0	0	0	1	0	0	0
616817	Microcephaly, Short Stature, And Impaired Glucose Metabolism 2	0	0	0	0	0	0	0	0	0	0	0	0	0	0	0	0	0	0	0
619083	Delpire-mcneill Syndrome	0	0	0	0	0	0	3	0	0	3	0	0	0	0	0	0	0	0	0
617537	Rahman Syndrome	0	0	0	3	0	0	0	2	0	0	0	0	0	0	0	2	0	2	1
616708	Desanto-shinawi Syndrome	0	0	0	0	0	0	0	0	0	0	0	0	0	0	0	0	0	0	0
PS136760	Frontonasal dysplasia	0	0	0	0	0	0	0	0	0	0	0	0	0	0	0	0	0	0	0
613204	Muscular Dystrophy, Congenital, Due To Integrin Alpha-7 Deficiency	0	0	0	0	0	0	0	0	0	0	0	0	0	0	0	0	0	0	0
614160	Muscle Hypertrophy	1	0	0	14	0	1	0	138	1	3	0	1	1	4	127	124	36	0	20
603736	Ohdo Syndrome, Sbbys Variant	0	0	0	0	0	0	0	0	0	0	0	0	0	0	0	0	0	0	0
PS613280	Hypermanganesemia with dystonia	0	0	0	0	0	0	0	0	0	0	0	0	0	0	0	0	0	0	0
251950	Mitochondrial Myopathy With Lactic Acidosis	1	0	0	0	0	0	0	1	0	0	0	0	0	4	0	1	0	0	0
PS607313	Gaze palsy, familial horizontal, with progressive scoliosis	0	0	0	0	0	0	0	0	0	0	0	0	0	0	0	0	0	0	0
255995	Myopathy, Congenital, Bailey-bloch	0	0	0	0	0	0	0	0	0	0	0	0	0	0	0	0	0	0	0
PS267700	Hemophagocytic lymphohistiocytosis, familial	0	0	2	0	0	0	0	0	1	1	3	2	1	0	0	0	0	3	0
609015	Trifunctional Protein Deficiency	0	0	0	0	0	0	0	1	0	0	0	0	0	0	0	0	0	0	0
617126	Alazami-yuan Syndrome	0	0	0	0	0	0	0	0	0	0	0	0	0	0	0	0	0	0	0
613724	Leukoencephalopathy With Dystonia And Motor Neuropathy	0	0	0	0	0	0	0	0	0	0	0	0	0	0	0	0	0	0	0
269150	Schinzel-giedion Midface-retraction Syndrome	0	0	0	0	0	0	0	0	0	0	0	0	0	0	0	0	0	0	0
PS180849	Rubinstein-Taybi syndrome	0	0	0	0	0	0	0	0	0	0	0	0	0	0	0	0	0	0	0
PS162400	Hereditary sensory and autonomic neuropathy	0	0	0	0	0	0	0	2	0	0	0	1	0	0	0	1	0	0	2
PS156200	Mental retardation, autosomal dominant	0	0	0	0	0	0	0	1	0	0	0	0	0	0	0	0	0	0	0
608611	Ribose 5-phosphate Isomerase Deficiency	0	0	0	0	0	0	0	0	0	0	0	0	0	0	0	0	0	0	0
612713	Kahrizi Syndrome	0	0	0	0	0	0	0	0	0	0	0	0	0	0	0	0	0	0	0
127300	Leri-weill Dyschondrosteosis	0	0	0	0	0	0	0	0	0	0	0	1	0	0	0	0	0	0	1
618828	Nabais Sa-de Vries Syndrome, Type 1	0	0	0	0	0	0	0	0	0	0	0	0	0	0	0	0	0	0	0
248800	Marinesco-sjogren Syndrome	0	0	0	0	0	0	2	1	0	0	0	1	0	2	1	3	0	0	3
201470	Acyl-coa Dehydrogenase, Short-chain, Deficiency Of	0	0	0	0	0	0	0	0	0	0	0	0	0	0	0	0	0	0	0
610140	Heart-hand Syndrome, Slovenian Type	0	0	0	0	0	0	0	0	0	0	0	0	0	0	0	0	0	0	0
614306	Cognitive Impairment With Or Without Cerebellar Ataxia	0	0	0	0	0	0	0	0	0	0	0	0	0	0	0	0	0	0	0
605850	Dimethylglycine Dehydrogenase Deficiency	0	0	0	0	0	0	0	0	0	0	0	0	0	0	0	0	0	0	0
606812	Fumarase Deficiency	0	0	0	0	0	0	0	0	0	0	0	0	0	0	0	0	0	0	0
617330	Hypotonia, Ataxia, And Delayed Development Syndrome	0	0	0	0	0	0	0	0	0	0	0	0	0	0	2	0	0	0	0
278780	Xeroderma Pigmentosum, Complementation Group G	0	0	0	0	0	0	0	0	0	0	0	0	0	0	0	0	0	0	0
618454	Developmental Delay With Or Without Dysmorphic Facies And Autism	0	0	0	0	0	0	0	0	0	0	0	0	0	0	0	0	0	0	0
618973	Neurodegeneration, Infantile-onset, Biotin-responsive	0	0	0	0	0	0	0	0	0	0	0	0	0	0	0	0	0	0	0
PS607014	Mucopolysaccharidoses	0	0	0	1	0	0	0	1	1	0	1	3	1	9	0	1	1	0	1
606170	Genitopatellar Syndrome	0	0	0	0	0	0	0	0	0	0	0	0	0	0	0	0	0	0	0
617333	Intellectual Developmental Disorder With Dysmorphic Facies And Ptosis	0	0	0	0	0	0	0	0	0	0	0	0	0	0	0	0	0	0	0
186000	Synpolydactyly 1	0	0	0	0	0	0	0	0	0	0	0	0	0	0	0	0	0	0	0
608634	Neuronopathy, Distal Hereditary Motor, Type Iib	0	0	0	0	0	0	0	0	0	0	0	0	0	0	1	0	0	0	0
600175	Spinal Muscular Atrophy, Distal, Congenital Nonprogressive	0	0	0	0	0	0	0	0	0	0	0	0	0	0	0	0	0	0	0
616875	Cerebellar Atrophy, Visual Impairment, And Psychomotor Retardation	0	0	0	0	0	0	0	0	0	0	0	0	0	0	0	0	0	0	0
226980	Epiphyseal Dysplasia, Multiple, With Early-onset Diabetes Mellitus	0	0	0	0	0	0	0	0	0	0	0	0	0	0	0	0	0	0	0
618870	Skeletal Dysplasia, Mild, With Joint Laxity And Advanced Bone Age	0	0	0	0	0	0	0	0	0	0	0	0	0	0	0	0	0	0	0
208230	Arthropathy, Progressive Pseudorheumatoid, Of Childhood	0	0	0	0	0	0	0	0	0	0	0	0	0	0	0	0	0	0	0
137440	Gerstmann-straussler Disease	0	0	0	0	0	0	0	0	0	0	0	0	0	0	0	0	0	0	0
609136	Peripheral Demyelinating Neuropathy, Central Dysmyelination, Waardenburg	0	0	0	0	0	0	0	0	0	0	0	0	0	0	0	0	0	0	0
236792	L-2-hydroxyglutaric Aciduria	0	0	0	0	0	0	0	0	0	0	0	0	0	0	0	0	0	0	0
PS160900	Myotonic dystrophy	0	0	0	0	0	0	8	20	1	1	0	0	0	3	13	20	0	0	2
144755	Hyperostosis Cranialis Interna	0	0	0	0	0	0	0	0	0	0	0	0	0	0	0	0	0	0	0
618846	Diets-jongmans Syndrome	0	0	0	0	0	0	0	0	0	0	0	0	0	0	0	0	0	0	0
610713	Brachydactyly-syndactyly Syndrome	0	0	0	0	0	0	0	0	0	0	0	0	0	0	0	0	0	0	0
616200	Ruijs-aalfs Syndrome	0	0	0	0	0	0	0	0	0	0	0	0	0	0	0	0	0	0	0
166350	Osseous Heteroplasia, Progressive	0	0	0	0	0	0	0	0	0	0	0	0	0	0	0	0	0	0	0
615829	Xia-gibbs Syndrome	0	0	0	0	0	0	0	0	0	0	0	0	0	0	0	0	0	0	0
600627	Hypertryptophanemia	0	0	0	0	0	0	0	0	0	0	0	0	0	0	0	0	0	0	0
300257	Danon Disease	0	0	0	0	0	0	0	0	0	0	0	0	0	0	1	0	0	1	0
256500	Netherton Syndrome	1	0	0	0	0	0	0	0	0	0	0	0	0	0	0	0	0	0	0
300376	Muscular Dystrophy, Becker Type	4	0	0	1	0	0	28	64	1	1	0	9	0	14	155	73	1	1	7
PS601390	Van Maldergem syndrome	0	0	0	0	0	0	0	0	0	0	0	0	0	0	0	0	0	0	0
250620	3-@hydroxyisobutyryl-coa Hydrolase Deficiency	0	0	0	0	0	0	0	0	0	0	0	0	0	0	0	0	0	0	0
616852	Myopathy, Scapulohumeroperoneal	0	0	0	0	0	0	0	0	0	0	0	0	0	0	0	1	0	0	0
612313	Glass Syndrome	2	0	0	1	0	0	0	0	0	0	0	0	0	1	0	0	1	0	0
PS244400	Primary ciliary dyskinesia	0	0	0	0	0	0	0	0	0	0	0	0	0	0	0	0	1	0	0
161200	Nail-patella Syndrome	0	0	0	0	0	0	0	0	0	0	0	0	0	0	0	0	0	0	0
607323	Duane-radial Ray Syndrome	0	0	0	0	0	0	0	0	0	0	0	0	0	0	0	0	0	0	0
230450	Gamma-glutamylcysteine Synthetase Deficiency, Hemolytic Anemia Dueto	0	0	0	0	0	0	0	0	0	0	0	0	0	0	0	0	0	0	0
PS612199	Cerebroretinal microangiopathy with calcfications and cysts	0	0	0	0	0	0	0	0	0	0	0	0	0	0	0	0	0	0	0
613507	Glycogen Storage Disease Xv	0	0	0	0	0	0	0	0	0	0	0	0	0	0	0	0	0	0	0
615547	Schaaf-yang Syndrome	0	0	0	0	0	0	0	0	0	0	0	0	0	0	0	0	0	0	0
PS175780	Brain small vessel disease	17	0	0	30	6	5	1	1	1	1	0	3	1	83	0	2	9	0	0
229050	Folic Acid, Transport Defect Involving	0	0	0	0	0	0	0	0	0	0	0	0	0	0	0	0	0	0	0
PS256730	Ceroid lipofuscinoses	0	0	0	0	0	0	0	0	0	0	0	0	0	0	0	0	0	0	0
PS309801	Linear skin defects with multiple congenital anomalies	0	0	0	0	0	0	0	0	0	0	0	0	0	0	0	0	0	0	0
226670	Epidermolysis Bullosa Simplex With Muscular Dystrophy	0	0	0	0	0	0	0	0	0	0	0	0	0	0	0	0	0	0	0
616154	Peroxisomal Fatty Acyl-coa Reductase 1 Disorder	0	0	0	0	0	0	0	0	0	0	0	0	0	0	0	0	0	0	0
PS127000	Kenny-Caffey syndrome	0	0	0	0	0	0	0	0	0	0	0	0	0	0	0	0	0	0	0
616268	Arboleda-tham Syndrome	0	0	0	0	0	0	0	0	0	0	0	0	0	0	0	0	0	0	0
232300	Glycogen Storage Disease Ii	0	0	0	0	0	0	0	5	0	0	0	1	0	0	6	3	0	0	0
PS184840	Otospondylomegaepiphyseal dysplasia	0	0	0	0	0	0	0	0	0	0	0	0	0	0	0	0	0	0	0
617384	Hyperphenylalaninemia, Mild, Non-bh4-deficient	0	0	0	0	0	0	0	0	0	0	0	0	0	0	0	0	0	0	0
PS168600	Parkinson disease	0	0	0	0	1	0	0	0	0	0	0	1	0	0	0	1	0	1	0
618590	Neurodevelopmental Disorder With Brain Anomalies, Seizures, And Scoliosis	0	0	0	0	0	0	0	0	0	0	0	0	0	0	0	0	0	0	0
PS314580	Wieacker-Wolff syndrome	0	0	0	0	0	0	0	0	0	0	0	0	0	0	0	0	0	0	0
162500	Neuropathy, Hereditary, With Liability To Pressure Palsies	0	0	0	0	0	0	0	0	0	0	0	0	0	0	0	0	0	0	0
312750	Rett Syndrome	0	0	0	0	0	0	1	0	1	0	0	0	0	1	0	0	0	0	0
300989	Meester-loeys Syndrome	0	0	0	0	0	0	0	0	0	0	0	0	0	0	0	0	0	0	0
245600	Multiple Joint Dislocations, Short Stature, Craniofacial Dysmorphism, With Or Without Congenital Heart Defects	0	0	0	0	0	0	0	0	0	0	0	0	0	0	0	0	0	0	0
616277	Mitochondrial Short-chain Enoyl-coa Hydratase 1 Deficiency	0	0	0	0	0	0	0	0	0	0	0	0	0	0	0	0	0	0	0
PS603387	Megalencephaly-polymicrogyria-polydactyly-hydrocephalus syndrome	0	0	0	0	0	0	0	0	0	0	0	0	0	0	0	0	0	0	0
618090	Neurodevelopmental Disorder With Epilepsy And Hypoplasia Of The Corpus Callosum	0	0	0	0	0	0	0	0	0	0	0	0	0	0	0	0	0	0	0
PS164400	Spinocerebellar ataxia	0	1	0	0	0	0	0	2	0	0	1	3	0	1	1	2	0	2	3
123320	Creatine Phosphokinase, Elevated Serum	0	0	0	1	0	0	2	13	0	1	0	0	0	1	6	9	0	0	0
300048	Intestinal Pseudoobstruction, Neuronal, Chronic Idiopathic, X-linked	0	0	0	0	0	0	0	0	0	0	0	0	0	0	0	0	0	0	0
604416	Pyogenic Sterile Arthritis, Pyoderma Gangrenosum, And Acne	0	0	0	0	0	0	0	0	0	0	0	0	0	0	0	0	0	0	0
243800	Johanson-blizzard Syndrome	0	0	0	0	0	0	0	0	0	0	0	0	0	0	0	0	0	0	0
607330	Lathosterolosis	0	0	0	0	0	0	0	0	0	0	0	0	0	0	0	0	0	0	0
616145	Catel-manzke Syndrome	0	0	0	0	0	0	0	0	0	0	0	0	0	0	0	0	0	0	0
176500	Dementia, Familial British	1	0	0	2	0	0	0	0	0	0	0	1	0	5	0	0	1	0	0
211900	Tumoral Calcinosis, Hyperphosphatemic, Familial	0	0	0	0	0	0	0	0	0	0	0	0	0	0	0	0	0	0	0
300209	Simpson-golabi-behmel Syndrome, Type 2	0	0	0	0	0	0	0	0	0	0	0	0	0	0	0	0	0	0	0
169400	Pelger-huet Anomaly	0	0	0	0	0	0	0	0	0	0	0	0	0	0	0	0	0	0	0
PS250950	3-Methylglutaconic aciduria	0	0	0	0	0	0	0	0	0	0	0	0	0	0	0	0	0	0	0
213000	Cerebellar Hypoplasia	0	0	0	0	0	0	0	0	0	0	0	0	0	0	0	0	0	0	0
618493	Hypotonia, Hyperventilation, Impaired Intellectual Development, Dysautonomia, Epilepsy, And Eye Abnormalities	0	0	0	0	0	0	0	0	0	0	0	0	0	0	0	0	0	0	0
PS305620	Frontometaphyseal dysplasia	0	0	0	0	0	0	0	0	0	0	0	0	0	0	0	0	0	0	0
186300	Syndactyly, Type V	0	0	0	0	0	0	0	0	0	0	0	0	0	0	0	0	0	0	0
213980	Craniofacial Dysmorphism, Skeletal Anomalies, And Mental Retardationsyndrome	0	0	0	0	0	0	0	0	0	0	0	0	0	0	0	0	0	0	0
608572	Burn-mckeown Syndrome	0	0	0	0	0	0	0	0	0	0	0	0	0	0	0	0	0	0	0
261515	D-bifunctional Protein Deficiency	0	0	0	0	0	0	0	0	0	0	0	0	0	0	0	0	0	0	0
607225	Spastic Paralysis, Infantile-onset Ascending	0	0	0	0	0	0	0	0	0	0	0	0	0	0	0	0	0	0	0
618603	Neurodevelopmental Disorder With Hypotonia And Variable Intellectual And Behavioral Abnormalities	0	0	0	0	0	0	0	0	0	0	0	0	0	0	0	0	0	0	0
153400	Lymphedema-distichiasis Syndrome	0	0	0	0	2	0	0	0	0	0	0	0	0	0	0	0	0	0	0
610187	Diaphragmatic Hernia 3	1	0	0	1	0	0	0	0	0	0	0	1	2	1	1	0	0	0	4
229700	Fructose-1,6-bisphosphatase Deficiency	0	2	1	0	0	0	11	2	4	3	3	1	0	0	0	2	1	5	3
602342	Pierpont Syndrome	0	0	0	0	0	0	0	0	0	0	0	0	0	0	0	0	0	0	0
608885	Stomatin-deficient Cryohydrocytosis With Neurologic Defects	0	0	0	0	0	0	0	0	0	0	0	0	0	0	0	0	0	0	0
613839	Megaloblastic Anemia Due To Dihydrofolate Reductase Deficiency	0	0	0	0	0	0	0	0	0	0	0	0	0	0	0	0	0	0	0
PS248600	Maple syrup urine disease	0	0	0	0	0	0	0	0	0	0	0	0	0	0	0	0	0	0	0
616505	Neuropathy, Hereditary Motor And Sensory, Type Vib	0	0	0	0	0	0	0	0	0	0	0	0	0	0	0	0	0	0	0
252650	Mucolipidosis Iv	0	0	0	0	0	0	0	1	0	0	0	0	1	2	0	0	1	0	1
PS617468	Arthrogryposis multiplex congenita	0	0	0	0	0	0	0	9	0	0	0	0	0	0	0	7	0	0	1
308050	Congenital Hemidysplasia With Ichthyosiform Erythroderma And Limb Defects	0	0	0	0	0	0	0	0	0	0	0	0	0	0	0	0	0	0	0
277400	Methylmalonic Aciduria And Homocystinuria, Cblc Type	0	0	0	0	0	0	0	0	0	0	0	0	0	0	0	0	0	0	0
257220	Niemann-pick Disease, Type C1	0	0	0	0	0	0	0	0	0	0	0	0	0	0	0	2	0	0	0
616737	Takenouchi-kosaki Syndrome	0	0	0	0	0	0	0	0	0	0	0	0	0	0	0	0	0	0	0
615553	Arthrogryposis, Mental Retardation, And Seizures	0	0	0	0	0	0	0	0	0	0	0	0	0	0	0	0	0	0	0
PS132400	Epiphyseal dysplasia, multiple	0	0	0	0	0	0	0	0	0	0	0	0	0	0	0	0	0	0	9
613870	Hirschsprung Disease, Cardiac Defects, And Autonomic Dysfunction	0	0	0	0	0	0	0	0	0	0	0	0	0	0	0	0	0	0	0
616577	Epilepsy, Hearing Loss, And Mental Retardation Syndrome	0	0	0	0	0	0	0	0	0	0	0	0	0	0	0	0	0	0	0
219800	Cystinosis, Nephropathic	1	0	0	0	0	0	0	0	0	0	0	0	0	2	0	1	0	0	0
312870	Simpson-golabi-behmel Syndrome, Type 1	0	0	0	0	0	0	0	0	0	0	0	0	0	0	0	0	0	0	0
611489	Corticosteroid-binding Globulin Deficiency	0	0	0	0	0	0	0	0	0	0	0	0	0	0	0	0	0	0	0
618797	Neurodevelopmental Disorder With Hypotonia, Neonatal Respiratory Insufficiency, And Thermodysregulation	0	0	0	0	0	0	0	0	0	0	0	0	0	0	0	0	0	0	0
613471	Reynolds Syndrome	1	0	0	0	0	0	0	0	0	0	0	0	0	0	0	1	0	0	0
615873	Helsmoortel-van Der Aa Syndrome	0	0	0	0	0	0	0	0	0	0	0	0	0	0	0	0	0	0	0
618501	Cerebellar Atrophy With Seizures And Variable Developmental Delay	0	0	0	0	0	0	0	0	0	0	0	0	0	0	0	0	0	0	0
618804	Sandestig-stefanova Syndrome	0	0	0	0	0	0	0	0	0	0	0	0	0	0	0	0	0	0	0
617721	Neuronopathy, Distal Hereditary Motor, Type Ix	0	0	0	0	0	0	0	0	0	0	0	0	0	0	0	0	0	0	0
PS208500	Short-rib thoracic dysplasia	0	0	0	0	0	0	0	0	0	0	0	0	0	0	0	0	0	0	0
181405	Scapuloperoneal Spinal Muscular Atrophy	1	0	0	0	0	0	1	29	0	0	0	2	0	1	10	33	0	0	7
617643	Cerebellar Atrophy, Developmental Delay, And Seizures	0	0	0	0	0	0	0	0	0	0	0	0	0	0	0	0	0	0	0
PS236600	Hydrocephalus, congenital	0	0	0	0	0	0	0	0	1	0	0	1	0	3	0	0	0	0	0
614307	Alpha-methylacyl-coa Racemase Deficiency	0	0	0	0	0	0	0	0	0	0	0	0	0	0	0	0	0	0	0
617755	Neurodevelopmental Disorder With Dysmorphic Facies And Distal Limb Anomalies	0	0	0	0	0	0	0	0	0	0	0	0	0	0	0	0	0	0	0
244450	Kaufman Oculocerebrofacial Syndrome	0	0	0	0	0	0	0	0	0	0	0	0	0	0	0	0	0	0	0
109400	Basal Cell Nevus Syndrome	0	0	0	0	1	0	0	0	0	0	0	0	0	0	0	0	0	0	1
246450	3-hydroxy-3-methylglutaryl-coa Lyase Deficiency	0	0	0	0	0	0	0	0	0	0	0	0	0	0	0	0	0	0	0
610474	Camptodactyly, Tall Stature, And Hearing Loss Syndrome	0	0	0	0	0	0	0	0	0	0	0	0	0	0	0	0	0	0	0
259770	Osteoporosis-pseudoglioma Syndrome	0	0	0	0	0	0	0	0	0	0	0	0	0	0	0	0	0	0	0
225280	Eem Syndrome	0	0	0	0	0	0	0	0	0	0	0	0	0	0	0	0	0	0	0
PS604391	Ataxia-telangiectasia-like disorder	0	0	0	0	0	0	0	0	0	0	0	0	0	0	0	0	0	0	0
222600	Diastrophic Dysplasia	0	0	0	0	0	0	0	0	0	0	0	0	0	0	0	0	0	0	0
601088	Ayme-gripp Syndrome	0	0	0	0	0	0	0	0	0	0	0	0	0	0	0	0	0	0	0
614813	Short Stature, Onychodysplasia, Facial Dysmorphism, And Hypotrichosis	0	0	0	0	0	0	0	0	0	0	0	0	0	0	0	0	0	0	0
618268	Trichohepatoneurodevelopmental Syndrome	0	0	0	0	0	0	3	0	0	3	0	0	0	0	0	0	0	0	0
613078	Nijmegen Breakage Syndrome-like Disorder	0	0	0	0	0	0	0	0	0	0	0	0	0	0	0	0	0	0	0
616449	Basel-vanagaite-smirin-yosef Syndrome	0	0	0	0	0	0	0	0	0	0	0	0	0	0	0	0	0	0	0
617066	Muscular Dystrophy, Congenital, Davignon-chauveau Type	0	0	0	0	1	0	0	9	1	0	0	1	0	5	8	5	0	0	6
617804	Neurodevelopmental Disorder With Severe Motor Impairment And Absent Language	0	0	0	0	0	0	0	0	0	0	0	0	0	0	0	0	0	0	0
613385	Autoimmune Disease, Multisystem, With Facial Dysmorphism	0	0	0	0	0	0	0	0	0	0	0	0	0	0	0	0	0	0	0
617561	Cohen-gibson Syndrome	0	0	0	0	0	0	0	0	0	0	0	0	0	0	0	0	0	0	0
301022	Neurodevelopmental Disorder, X-linked, With Craniofacial Abnormalities	0	0	0	0	0	0	0	0	0	0	0	0	0	0	0	0	0	0	0
618356	Neurodevelopmental Disorder With Central And Peripheral Motor Dysfunction	0	0	0	0	0	0	0	0	0	0	0	0	0	0	0	0	0	0	0
616859	Spasticity, Childhood-onset, With Hyperglycinemia	0	0	0	0	0	0	0	0	0	0	0	0	0	0	0	0	0	0	0
604454	Welander Distal Myopathy	0	0	0	0	0	0	0	6	0	0	0	0	0	0	1	14	0	0	2
618284	Microcephaly, Cataracts, Impaired Intellectual Development, And Dystonia With Abnormal Striatum	0	0	0	0	0	0	0	0	0	0	0	0	0	0	0	0	0	0	0
617260	Global Developmental Delay, Absent Or Hypoplastic Corpus Callosum, And Dysmorphic Facies	0	0	0	0	0	0	0	0	0	0	0	0	0	0	0	0	0	0	0
208050	Arterial Tortuosity Syndrome	0	0	0	0	0	0	0	0	0	0	0	0	0	0	0	0	0	0	0
236500	Multinucleated Neurons, Anhydramnios, Renal Dysplasia, Cerebellar Hypoplasia, And Hydranencephaly	0	0	0	0	0	0	0	0	0	0	0	0	0	0	0	0	0	0	0
PS256520	Neu-Laxova syndrome	0	0	0	0	0	0	0	0	0	0	0	0	0	0	0	0	0	0	0
277410	Methylmalonic Aciduria And Homocystinuria, Cbld Type	0	0	0	0	0	0	0	0	0	0	0	0	0	0	0	0	0	0	0
600334	Tibial Muscular Dystrophy, Tardive	0	0	0	0	0	0	0	6	0	0	0	0	0	0	1	14	0	0	2
PS164310	Oculopharyngodistal myopathy	0	0	0	0	0	0	0	0	0	0	0	0	0	0	0	0	0	0	0
302500	Spinocerebellar Ataxia, X-linked 1	0	0	0	0	0	0	0	0	0	0	0	0	0	0	0	0	0	0	0
617306	Coloboma, Osteopetrosis, Microphthalmia, Macrocephaly, Albinism, And Deafness	0	0	0	0	0	0	0	0	0	0	0	0	0	0	0	0	0	0	0
PS254090	Ullrich congenital muscular dystrophy	0	0	0	0	0	0	0	1	0	0	0	0	0	1	1	0	0	0	3
213700	Cerebrotendinous Xanthomatosis	0	0	0	0	0	0	0	0	0	0	0	0	0	0	0	0	0	0	23
PS233400	Perrault syndrome	0	0	0	0	0	0	0	0	0	0	0	0	0	0	0	0	0	0	0
168300	Paramyotonia Congenita Of Von Eulenburg	0	0	0	0	0	0	5	45	0	1	0	0	0	2	14	38	0	0	2
300523	Allan-herndon-dudley Syndrome	0	0	0	0	0	0	0	0	0	0	0	0	0	0	1	0	0	0	0
610090	Pyridoxamine 5-prime-phosphate Oxidase Deficiency	0	0	0	0	0	0	0	0	0	0	0	0	0	0	0	0	0	0	0
619042	Spinal Muscular Atrophy, Infantile, James Type	0	0	0	0	0	0	0	0	0	0	0	0	0	0	0	0	0	0	0
250800	Methemoglobinemia Due To Deficiency Of Methemoglobin Reductase	0	0	0	0	0	0	0	0	0	0	0	0	0	0	0	0	0	0	0
618774	Cebalid Syndrome	0	0	0	0	0	0	3	0	0	3	0	0	0	0	0	0	0	0	0
PS151660	Lipodystrophy, familial partial	0	0	0	1	0	0	0	1	0	0	0	0	0	0	0	0	0	0	0
616954	You-hoover-fong Syndrome	0	0	0	0	0	0	0	0	0	0	0	0	0	0	0	0	0	0	0
PS118100	Klippel-Feil syndrome	0	0	0	0	0	0	0	0	0	0	0	0	0	0	0	0	0	0	0
618088	Neurodevelopmental Disorder With Regression, Abnormal Movements, Loss Of Speech, And Seizures	0	0	0	0	0	0	0	0	0	0	0	0	0	0	0	0	0	0	0
613454	Rett Syndrome, Congenital Variant	0	0	0	0	0	0	0	0	0	0	0	0	0	0	0	0	0	0	0
610992	Phosphoserine Aminotransferase Deficiency	0	0	0	0	0	0	0	0	0	0	0	0	0	0	0	0	0	0	0
615510	Alacrima, Achalasia, And Mental Retardation Syndrome	0	0	0	0	0	0	0	0	0	0	0	0	0	0	0	0	0	0	0
265000	Multiple Pterygium Syndrome, Escobar Variant	0	0	0	0	0	0	0	0	0	0	0	0	0	0	0	0	0	0	0
PS603041	Mitochondrial DNA depletion syndrome	0	0	0	0	0	0	0	2	0	0	0	0	0	0	0	3	0	0	1
256550	Neuraminidase Deficiency	0	1	1	0	0	0	1	1	0	0	0	0	1	4	0	0	1	0	2
268200	Rhabdomyolysis, Acute Recurrent	0	0	0	0	0	0	0	0	0	0	0	0	0	0	0	0	0	0	0
PS613155	Muscular dystrophy-dystroglycanopathy, type B	0	0	0	0	0	0	0	0	0	0	0	0	0	0	1	0	0	0	0
PS192500	Long QT syndrome	0	0	0	0	0	0	0	21	0	0	0	0	0	0	0	40	0	0	1
618476	Brain Abnormalities, Neurodegeneration, And Dysosteosclerosis	0	0	0	0	0	0	0	0	0	0	0	0	0	0	0	0	0	0	0
600920	Van Den Ende-gupta Syndrome	0	0	0	0	0	0	0	0	0	0	0	0	0	0	0	0	0	0	0
248700	Marden-walker Syndrome	0	0	0	0	0	0	0	0	0	0	0	0	0	0	0	0	0	0	0
266100	Epilepsy, Pyridoxine-dependent	0	0	0	0	0	0	0	0	0	0	0	0	0	0	0	0	0	0	0
PS618332	Menke-Hennekam syndrome	0	0	0	0	0	0	0	0	0	0	0	0	0	0	0	0	0	0	0
612951	Leukoencephalopathy, Cystic, Without Megalencephaly	0	0	0	0	0	0	0	0	0	0	0	0	0	0	0	0	0	0	0
617241	Lung Disease, Immunodeficiency, And Chromosome Breakage Syndrome	0	0	0	0	0	0	0	0	0	0	0	0	0	0	0	0	0	0	0
617222	Sudden Cardiac Failure, Infantile	0	0	0	0	0	0	0	0	0	0	0	0	0	0	0	0	0	0	0
211500	Bulbar Palsy, Progressive, Of Childhood	0	0	0	0	0	0	0	0	0	0	0	0	0	0	0	0	0	0	0
232200	Glycogen Storage Disease Ia	0	0	0	0	0	0	0	0	0	0	0	0	0	0	0	0	0	0	0
239500	Hyperprolinemia, Type I	0	0	0	0	0	0	0	0	0	0	0	0	0	0	0	0	0	0	0
618316	Intellectual Developmental Disorder With Cardiac Defects And Dysmorphic Facies	0	0	0	0	0	0	0	0	0	0	0	0	0	0	0	0	0	0	0
216400	Cockayne Syndrome, Type A	0	0	0	0	0	0	0	0	0	0	0	0	0	0	0	0	0	0	0
250940	Homocystinuria-megaloblastic Anemia, Cblg Complementation Type	0	0	0	0	0	0	0	0	0	0	0	0	0	0	0	0	0	0	0

## Sheet: Spleen
Supplementary File 3D. Names of disease and cell type co-appearance in PubMed records in spleen.
Disease\Phenotypic series accession (OMIM)	Disease\Phenotypic series name	cd1c-positive myeloid dendritic cell	cd4-positive, alpha-beta memory t cell	cd8-positive, alpha-beta memory t cell	cd8-positive, alpha-beta t cell	cd141-positive myeloid dendritic cell	classical monocyte	endothelial cell	erythrocyte	hematopoietic stem cell	innate lymphoid cell	intermediate monocyte	macrophage	mature nk t cell	memory b cell	naive b cell	naive thymus-derived cd4-positive, alpha-beta t cell	naive thymus-derived cd8-positive, alpha-beta t cell	neutrophil	nk cell	plasma cell	plasmacytoid dendritic cell	platelet	regulatory t cell	type i nk t cell
612840	Leukocyte Adhesion Deficiency, Type Iii	0	0	0	0	0	0	0	0	0	0	0	0	0	0	0	0	0	0	1	0	0	0	0	0
PS268000	Retinitis pigmentosa	0	0	0	0	0	1	0	1	1	0	0	0	0	0	0	0	0	0	0	0	0	0	0	0
222800	Diphosphoglycerate Mutase Deficiency Of Erythrocyte	0	0	0	0	0	0	0	0	0	0	1	0	0	0	0	0	0	0	0	0	0	0	0	0
249100	Familial Mediterranean Fever, Ar	0	0	0	0	0	0	0	0	0	0	0	0	0	0	0	0	0	0	0	0	0	0	0	0
618999	Autoinflammation, Immune Dysregulation, And Eosinophilia	0	0	0	0	0	0	0	0	0	0	0	0	0	0	0	0	0	0	0	0	0	0	0	0
PS276700	Tyrosinemia	0	0	0	0	0	0	0	0	0	0	0	0	0	0	0	0	0	1	0	0	0	0	0	0
102700	Severe Combined Immunodeficiency, Autosomal Recessive, T Cell-negative,b Cell-negative, Nk Cell-negative, Due To Adenosine Deaminase Deficiency	0	0	0	0	0	0	0	0	0	0	0	0	0	0	0	0	0	0	0	0	0	0	0	0
609628	Majeed Syndrome	0	0	0	0	0	0	0	0	0	0	0	0	0	0	0	0	0	0	0	0	0	0	0	0
240300	Autoimmune Polyendocrinopathy Syndrome , Type I, With Or Without Reversible Metaphyseal Dysplasia	0	0	0	0	0	0	0	0	0	0	0	0	0	0	0	0	0	0	0	0	0	0	0	0
269921	Sialuria	0	0	0	0	0	0	0	1	0	0	0	0	0	0	0	0	0	0	0	0	0	0	0	0
608013	Gaucher Disease, Perinatal Lethal	0	0	0	0	0	0	0	0	0	0	0	0	0	0	0	0	0	0	0	0	0	0	0	0
PS615438	Infantile liver failure syndrome	0	0	0	0	0	0	0	0	0	0	0	0	0	0	0	0	0	0	0	0	0	0	0	0
133540	Cockayne Syndrome, Type B	0	0	0	0	0	0	0	0	0	0	0	0	0	1	1	0	0	0	0	0	0	0	0	0
207750	Apolipoprotein C-ii Deficiency	0	0	0	0	0	0	0	0	0	0	0	0	0	0	0	0	0	0	0	0	0	0	0	0
613470	Hemolytic Anemia, Nonspherocytic, Due To Glucose Phosphate Isomerase	0	0	0	0	0	0	0	5	0	0	1	0	0	0	0	0	0	0	0	0	0	0	0	0
616651	Roifman Syndrome	0	0	0	0	0	0	0	0	0	0	0	0	0	0	0	0	0	0	0	0	0	0	0	0
230600	Gm1-gangliosidosis, Type Ii	0	0	0	0	0	0	0	0	0	0	0	0	0	0	0	0	0	0	0	1	0	0	0	0
PS213200	Spinocerebellar ataxia, autosomal recessive	0	0	0	0	0	0	0	0	0	0	0	0	0	0	0	0	0	0	0	0	0	0	0	0
272200	Multiple Sulfatase Deficiency	0	0	0	0	0	0	0	0	0	0	0	0	1	0	0	0	0	0	0	0	0	0	0	1
253260	Biotinidase Deficiencymultiple Carboxylase Deficiency, Late-onset	0	0	0	0	0	0	0	0	0	0	0	0	0	0	0	0	0	0	0	0	0	0	0	0
PS173900	Polycystic kidney disease	0	0	0	0	0	0	3	0	0	0	0	0	0	0	0	0	0	0	0	0	0	0	0	0
607115	Cinca Syndrome	0	0	0	0	0	0	0	0	0	1	0	0	0	1	0	0	0	1	0	0	0	0	0	0
617746	Sweeney-cox Syndrome	0	0	0	0	0	0	0	0	0	0	0	0	0	0	0	0	0	0	0	0	0	0	0	0
133180	Erythroleukemia, Familial, Susceptibility To	0	0	0	0	0	0	0	0	0	0	0	0	0	0	0	0	0	0	0	0	0	0	0	0
153670	Bernard-soulier Syndrome, Benign Autosomal Dominant	0	0	0	0	0	0	0	0	0	0	0	0	0	0	0	0	0	0	0	0	0	0	0	0
612387	Sarcoidosis, Susceptibility To, 2	0	0	0	0	0	0	0	0	0	0	0	0	0	0	0	0	0	0	0	0	0	0	2	0
274000	Thrombocytopenia-absent Radius Syndrome	0	0	0	0	0	0	0	0	0	0	0	0	0	0	0	0	0	0	0	0	0	1	0	0
PS100300	Adams-Oliver syndrome	0	0	0	0	0	0	0	0	0	0	0	0	0	0	0	0	0	0	0	0	0	0	0	0
PS309800	Microphthalmia, syndromic	0	0	0	0	0	0	0	0	0	0	0	0	0	0	0	0	0	0	0	0	0	0	0	0
615947	Hyperlipoproteinemia, Type Id	0	0	0	0	0	0	0	0	0	0	0	0	0	0	0	0	0	0	0	0	0	0	0	0
614592	Bent Bone Dysplasia Syndrome	0	0	0	0	0	0	0	0	0	0	0	0	0	0	0	0	0	0	0	0	0	0	0	0
215140	Hydrops-ectopic Calcification-moth-eaten Skeletal Dysplasia	0	0	0	0	0	0	0	0	0	0	0	0	0	0	0	0	0	0	0	0	0	0	0	0
202400	Afibrinogenemia, Congenitalhypofibrinogenemia, Congenital, Included	0	0	0	0	0	0	0	0	0	0	0	0	0	0	0	0	0	0	0	0	0	0	0	0
PS225750	Aicardi-Goutieres syndrome	0	0	0	0	0	0	0	0	0	0	2	0	0	0	0	0	0	0	0	0	1	0	0	0
PS308230	Immunodeficiency with hyper-IgM	0	0	0	0	0	1	0	0	1	2	0	0	0	18	10	0	0	0	0	3	0	0	0	1
PS115150	Cardiofaciocutaneous syndrome	0	0	0	0	0	0	0	0	0	0	0	0	0	0	0	0	0	0	0	0	0	0	0	0
208530	Asplenia With Cardiovascular Anomalies	0	0	0	0	0	0	0	0	0	0	0	0	0	2	0	0	0	1	0	0	0	0	0	0
PS120100	Familial cold autoinflammatory syndrome	0	0	0	0	0	0	0	0	0	1	0	0	0	1	0	0	0	1	0	0	0	0	0	0
PS145000	Hyperparathyroidism	0	0	0	0	0	0	0	0	1	0	0	0	0	0	0	0	0	1	0	0	0	0	0	0
PS300345	Microphthalmia, isolated, with coloboma	0	0	0	0	0	0	0	0	0	0	0	0	0	0	0	0	0	0	0	0	0	0	0	0
263700	Porphyria, Congenital Erythropoietic	0	0	0	0	0	0	0	3	0	0	0	0	0	0	0	0	0	0	0	0	0	0	0	0
616050	Autoinflammation With Infantile Enterocolitis	0	0	0	0	0	0	0	0	0	0	0	0	0	0	0	0	0	0	0	0	0	0	0	0
PS211600	Cholestasis, progressive familial intrahepatic	0	0	0	0	0	0	0	0	0	0	0	0	0	0	0	0	0	0	0	0	0	0	0	0
PS608594	Lipodystrophy, congenital generalized	0	0	0	0	0	0	0	0	0	0	0	0	0	1	0	0	0	0	0	0	0	0	0	0
615688	Vasculitis, Autoinflammation, Immunodeficiency, And Hematologic Defects Syndrome	0	0	0	0	0	1	0	0	0	0	1	0	0	4	0	0	0	0	0	0	0	0	0	0
230500	Gm1-gangliosidosis, Type I	0	0	0	0	0	0	0	0	0	0	0	0	0	0	0	0	0	0	0	1	0	0	0	0
248500	Mannosidosis, Alpha B, Lysosomal	0	0	0	0	0	0	0	0	0	0	0	0	0	0	0	0	0	0	0	0	0	0	0	0
PS267700	Hemophagocytic lymphohistiocytosis, familial	0	0	0	2	0	3	0	0	1	2	1	1	3	6	4	0	0	0	40	4	3	2	4	55
269150	Schinzel-giedion Midface-retraction Syndrome	0	0	0	0	0	0	0	0	0	0	0	0	0	0	0	0	0	0	0	0	0	0	0	0
PS214100	Peroxisome biogenesis disorder	0	0	0	0	0	0	0	0	0	0	0	0	0	0	0	0	0	0	0	0	0	0	0	0
PS251290	Pseudo-TORCH syndrome	0	0	0	0	0	0	0	0	0	0	2	0	0	0	0	0	0	0	0	0	1	0	0	0
610377	Mevalonic Aciduria	0	0	0	0	0	1	0	0	0	1	6	0	0	0	0	0	0	0	0	0	0	0	1	0
PS256040	Proteosome-associated autoinflammatory syndrome	0	0	0	0	0	0	0	0	0	0	0	0	0	0	0	0	0	0	0	0	0	0	0	0
616649	Spherocytosis, Type 2	0	0	0	0	0	0	0	2	0	0	0	0	0	0	0	0	0	0	0	0	0	0	0	0
612690	Spherocytosis, Type 5	0	0	0	0	0	0	0	1	0	0	0	0	0	0	0	0	0	0	0	0	0	0	0	0
300842	Mcleod Syndrome	0	0	0	0	0	0	0	1	0	0	0	0	0	0	0	0	0	0	0	0	0	0	0	0
610539	Gaucher Disease, Atypical	0	0	0	0	0	0	0	0	0	0	0	0	0	0	0	0	0	0	0	0	0	0	0	0
PS133100	Erythrocytosis, familial	0	0	0	0	0	1	0	2	1	0	0	0	0	0	0	0	0	0	0	0	0	0	0	0
PS218330	Cranioectodermal dysplasia	0	0	0	0	0	0	0	0	0	0	0	0	0	0	0	0	0	0	0	0	0	0	0	0
615559	Autoimmune Lymphoproliferative Syndrome, Type Iii	0	0	0	0	0	0	0	0	0	0	0	0	0	0	0	0	0	0	0	0	0	0	0	0
PS230400	Galactosemia	0	0	0	0	0	1	1	5	0	0	0	0	0	0	0	0	0	1	0	0	0	1	0	0
PS607014	Mucopolysaccharidoses	0	0	0	0	0	0	0	0	8	1	1	1	1	0	0	0	0	0	0	4	0	0	0	2
PS227650	Fanconi anemia	0	0	0	0	0	2	1	1	47	0	1	0	0	1	1	0	0	1	2	1	0	0	0	1
611881	Glycogen Storage Disease Xii	0	0	0	0	0	0	0	0	0	0	0	0	0	0	0	0	0	0	0	0	0	0	0	0
612653	Spherocytosis, Type 4	0	0	0	0	0	0	0	0	0	0	0	0	0	0	0	0	0	0	0	0	0	0	0	0
150550	Periodic Fever, Immunodeficiency, And Thrombocytopenia Syndrome	0	0	0	0	0	0	0	0	0	0	0	0	0	0	0	0	0	0	0	0	0	0	0	0
612714	Exocrine Pancreatic Insufficiency, Dyserythropoietic Anemia, And Calvarial	0	0	0	0	0	0	0	0	0	0	0	0	0	0	0	0	0	0	0	0	0	0	0	0
607625	Niemann-pick Disease, Type C2	0	0	0	0	0	0	0	0	0	0	0	0	0	0	0	0	0	0	0	0	0	0	0	0
613978	Hemoglobin H Disease	0	0	0	0	0	1	0	12	1	0	1	0	0	0	0	0	0	0	0	0	0	0	0	1
252940	Mucopolysaccharidosis Type Iiid	0	0	0	0	0	0	0	0	0	1	0	0	0	0	0	0	0	0	0	1	0	0	0	0
611721	Combined Saposin Deficiency	0	0	0	0	0	0	0	0	0	0	0	0	0	0	0	0	0	0	0	0	0	0	0	0
603903	Sickle Cell Anemia	0	0	0	0	0	3	2	24	8	1	1	0	0	1	0	0	0	3	1	2	0	3	0	0
300853	Immunodeficiency, X-linked, With Magnesium Defect, Epstein-barr Virus Infection And Neoplasia	0	0	0	0	0	0	0	0	0	0	0	0	0	1	1	0	0	0	0	0	0	0	0	0
616100	Autoimmune Lymphoproliferative Syndrome, Type V	0	0	0	0	0	0	0	0	0	0	0	0	0	0	0	0	0	0	0	0	0	0	0	0
PS135500	Zimmermann-Laband syndrome	0	0	0	0	0	0	0	0	0	0	0	0	0	0	0	0	0	0	0	0	0	0	0	0
PS607594	Immunodeficiency, common variable	0	0	0	4	0	2	1	0	3	16	1	0	3	233	104	0	0	0	4	29	10	0	22	2
256540	Neuraminidase Deficiency With Beta-galactosidase Deficiency	0	0	0	0	0	0	0	0	0	0	0	0	0	0	0	0	0	0	0	0	0	0	0	0
PS206100	Anemia, hypochromic microcytic, with iron overload	0	0	0	0	0	0	0	0	0	0	0	0	0	0	0	0	0	0	0	0	0	0	0	0
PS615952	Autoimmune disease, multisystem, infantile-onset	0	0	0	0	0	0	0	0	0	0	0	0	0	0	0	0	0	0	0	0	0	0	0	0
602079	Trimethylaminuria	0	0	0	0	0	0	0	0	0	0	0	0	0	0	0	0	0	0	0	0	0	0	0	0
PS224120	Anemia, congenital dyserythropoietic	0	0	0	0	0	0	0	10	1	0	0	0	0	0	0	0	0	0	0	0	0	0	0	0
269920	Infantile Sialic Acid Storage Disorder	0	0	0	0	0	0	0	1	0	0	0	0	0	0	0	0	0	0	0	0	0	0	0	0
617303	Mucopolysaccharidosis-plus Syndrome	0	0	0	0	0	0	0	0	0	0	0	0	0	0	0	0	0	0	0	0	0	0	0	0
PS236680	Hydrolethalus syndrome	0	0	0	0	0	0	0	0	0	0	0	0	0	0	0	0	0	0	0	0	0	0	0	0
PS236100	Holoprosencephaly	0	0	0	0	0	0	0	0	1	0	0	0	0	0	0	0	0	0	0	0	0	0	0	0
252500	Mucolipidosis Ii Alpha/beta	0	0	0	0	0	0	0	0	0	0	0	0	0	0	0	0	0	0	1	1	0	0	0	0
PS244400	Primary ciliary dyskinesia	0	0	0	0	0	1	0	0	0	0	0	0	0	1	0	0	0	5	0	0	0	0	0	0
615512	Triosephosphate Isomerase Deficiency	0	0	0	0	0	0	0	0	0	0	0	0	0	0	0	0	0	0	0	0	0	0	0	0
613179	Immunodeficiency Due To Purine Nucleoside Phosphorylase Deficiency	0	0	0	0	0	0	0	0	0	0	0	0	1	0	0	0	0	0	0	0	0	0	0	0
607616	Niemann-pick Disease, Type B	0	0	0	0	0	1	0	0	0	0	0	0	0	0	0	0	0	0	0	0	0	0	0	0
PS203300	Hermansky-Pudlak syndrome	0	0	0	0	0	1	0	0	1	0	0	0	1	0	0	0	0	0	1	0	1	12	0	3
608971	Severe Combined Immunodeficiency, Autosomal Recessive, T Cell-negative,b Cell-positive, Nk Cell-positive	0	0	0	0	0	0	0	0	0	1	0	0	0	0	0	0	0	0	0	0	0	0	0	1
PS202700	Neutropenia, severe congenital	0	0	0	0	0	2	0	0	4	1	1	0	0	3	0	0	0	15	1	0	0	0	1	0
232300	Glycogen Storage Disease Ii	0	0	0	0	0	0	0	0	0	0	0	0	0	0	4	0	0	0	0	4	0	0	0	1
PS607765	Bile acid synthesis defect, congenital	0	0	0	0	0	0	0	0	0	0	0	0	0	0	0	0	0	0	0	0	0	0	0	0
231000	Gaucher Disease, Type Iii	0	0	0	0	0	6	1	0	3	1	3	7	0	1	1	0	0	2	0	6	5	0	0	5
602557	Spondyloepimetaphyseal Dysplasia, Shohat Type	0	0	0	0	0	0	0	0	0	0	0	0	0	0	0	0	0	0	0	0	0	0	0	0
121300	Coproporphyria	0	0	0	0	0	0	0	0	0	0	0	0	0	0	0	0	0	0	0	0	0	0	0	0
610199	Diabetes Mellitus, Neonatal, With Congenital Hypothyroidism	0	0	0	0	0	0	0	0	0	0	0	0	0	0	0	0	0	0	0	0	0	0	0	0
268800	Sandhoff Disease	0	0	0	0	0	0	1	0	0	0	0	0	1	0	0	0	0	0	0	1	0	0	0	2
612852	Interleukin 1 Receptor Antagonist Deficiency	0	0	0	0	0	0	0	0	0	0	0	0	0	0	0	0	0	0	0	0	0	0	0	0
181000	Sarcoidosis, Susceptibility To, 1	0	0	0	0	0	0	0	0	0	0	0	0	0	0	0	0	0	0	0	0	1	0	2	0
PS187950	Thrombocythemia	0	0	0	0	0	1	1	0	14	0	2	1	0	0	0	0	0	6	1	8	2	95	0	1
616084	Sideroblastic Anemia With B-cell Immunodeficiency, Periodic Fevers, And Developmental Delay	0	0	0	0	0	0	0	0	0	0	0	0	0	0	0	0	0	0	0	0	0	0	0	0
617388	Autoinflammation With Arthritis And Dyskeratosis	0	0	0	0	0	0	0	0	0	0	0	0	0	0	0	0	0	0	0	0	0	0	0	0
PS153100	Lymphatic malformation	0	0	0	3	0	0	11	0	1	1	0	1	2	8	4	0	0	0	1	7	1	1	2	0
604416	Pyogenic Sterile Arthritis, Pyoderma Gangrenosum, And Acne	0	0	0	0	0	1	0	0	0	0	0	0	0	0	0	0	0	2	0	0	0	0	0	0
607330	Lathosterolosis	0	0	0	0	0	0	0	0	0	0	0	0	0	0	0	0	0	0	0	0	0	0	0	0
PS214450	Griscelli syndrome	0	0	0	0	0	0	0	0	0	0	0	0	1	1	0	0	0	0	3	1	0	0	0	5
201100	Acrodermatitis Enteropathica, Zinc-deficiency Type	0	0	0	0	0	0	0	0	0	0	0	0	0	0	0	0	0	0	0	0	0	0	0	0
601859	Autoimmune Lymphoproliferative Syndrome	0	1	1	3	0	0	0	0	1	0	0	0	0	9	7	0	0	1	0	4	2	0	7	0
300908	Anemia, Nonspherocytic Hemolytic, Due To G6pd Deficiency	0	0	0	0	0	0	0	0	0	0	0	0	0	0	0	0	0	0	0	0	0	0	0	0
235700	Hexokinase Deficiency Hemolytic Anemia	0	0	0	0	0	0	0	0	0	0	0	0	0	0	0	0	0	0	0	0	0	0	0	0
618541	Hypopigmentation, Organomegaly, And Delayed Myelination And Development	0	0	0	0	0	0	0	0	0	0	0	0	0	0	0	0	0	0	0	0	0	0	0	0
214500	Chediak-higashi Syndrome	0	0	0	0	0	0	0	1	1	6	1	0	1	0	0	0	0	19	8	3	0	11	0	4
618440	Oculoskeletodental Syndrome	0	0	0	0	0	0	0	0	0	0	0	0	0	0	0	0	0	0	0	0	0	0	0	0
PS306955	Heterotaxy, visceral	0	0	0	0	0	0	0	0	0	0	0	0	0	2	0	0	0	1	0	0	0	0	0	0
PS300751	Anemia, Sideroblastic	0	0	0	0	0	0	0	7	2	0	1	1	0	0	0	0	0	1	0	2	0	3	0	0
273395	Tetra-amelia, Autosomal Recessive	0	0	0	0	0	0	0	0	0	0	0	0	0	0	0	0	0	0	0	0	0	0	0	0
216360	Coach Syndrome	0	0	0	0	0	0	0	0	0	0	0	0	0	0	0	0	0	0	0	0	0	0	0	0
608885	Stomatin-deficient Cryohydrocytosis With Neurologic Defects	0	0	0	0	0	0	0	0	0	0	0	0	0	0	0	0	0	0	0	0	0	0	0	0
PS235200	Hemochromatosis	0	0	0	1	0	2	0	1	0	0	0	0	0	0	0	0	0	0	0	2	0	0	0	0
243605	Stromme Syndrome	0	0	0	0	0	0	0	0	0	0	0	0	0	0	0	0	0	0	0	0	0	0	0	0
185000	Overhydrated Hereditary Stomatocytosis	0	0	0	0	0	0	0	2	0	0	0	0	0	0	0	0	0	0	0	0	0	0	0	0
PS259700	Osteopetrosis, autosomal recessive	0	0	0	0	0	0	0	0	0	0	4	0	0	0	0	0	0	0	0	0	0	0	0	0
618852	Autoinflammation With Episodic Fever And Lymphadenopathy	0	0	0	0	0	0	0	0	0	0	0	0	0	0	0	0	0	0	0	0	0	0	0	0
257220	Niemann-pick Disease, Type C1	0	0	0	0	0	0	0	0	0	0	0	0	0	0	0	0	0	0	0	0	0	0	0	2
182900	Spherocytosis, Hereditary	0	0	0	0	0	0	0	79	1	0	0	0	0	1	0	0	0	2	1	0	0	0	1	0
PS220110	Mitochondrial complex IV deficiency, nuclear-type	0	0	0	0	0	0	0	0	0	0	0	0	0	0	0	0	0	0	0	0	0	0	0	0
194380	Dehydrated Hereditary Stomatocytosis With Or Without Pseudohyperkalemiaand/or Perinatal Edema	0	0	0	0	0	0	0	1	0	0	0	0	0	0	0	0	0	0	0	0	0	0	0	0
PS208540	Renal-hepatic-pancreatic dysplasia	0	0	0	0	0	0	0	0	0	0	0	0	0	0	0	0	0	0	0	0	0	0	0	0
219800	Cystinosis, Nephropathic	0	0	0	0	0	0	1	0	1	0	0	0	0	0	0	0	0	0	0	0	0	0	0	0
312870	Simpson-golabi-behmel Syndrome, Type 1	0	0	0	0	0	0	0	0	0	0	0	0	0	0	0	0	0	0	0	0	0	0	0	0
607271	Autoimmune Lymphoproliferative Syndrome, Type Iib	0	1	1	3	0	0	0	0	1	0	0	0	0	9	7	0	0	1	0	4	2	0	7	0
614470	Ras-associated Autoimmune Lymphoproliferative Syndrome Type Iv, Somatic	0	0	0	0	0	0	0	0	0	0	0	0	0	0	0	0	0	0	0	0	0	0	0	0
PS184255	Spondylometaphyseal dysplasia	0	0	0	0	0	0	0	0	0	0	0	0	0	0	0	0	0	0	0	0	0	0	0	0
613471	Reynolds Syndrome	0	0	0	0	0	0	1	0	0	0	1	0	0	2	3	0	0	0	1	0	0	0	0	1
271400	Asplenia, Isolated Congenital	0	0	0	0	0	0	0	0	0	0	0	0	0	0	0	0	0	0	0	0	0	0	0	0
PS208500	Short-rib thoracic dysplasia	0	0	0	0	0	0	0	0	0	0	0	0	0	0	0	0	0	0	0	0	0	0	0	0
105200	Amyloidosis, Familial Visceral	0	0	0	0	0	0	0	0	0	0	0	0	0	0	0	0	0	0	0	0	0	0	0	0
613027	Glycogen Storage Disease Ixc	0	0	0	0	0	0	0	0	0	0	0	0	0	0	0	0	0	0	0	0	0	0	0	0
222700	Lysinuric Protein Intolerance	0	0	0	0	0	0	0	0	0	0	0	0	0	0	0	0	0	0	0	0	0	0	0	0
605309	Macrocephaly/autism Syndrome	0	0	0	0	0	0	0	0	0	0	0	0	0	0	0	0	0	0	0	0	0	0	0	0
257200	Niemann-pick Disease, Type A	0	0	0	0	0	1	0	0	0	0	1	0	0	0	0	0	0	0	0	0	0	0	0	1
617441	Thrombocytopenia, Anemia, And Myelofibrosis	0	0	0	0	0	0	0	0	1	0	0	0	0	0	0	0	0	0	0	0	0	0	0	0
185020	Cryohydrocytosis	0	0	0	0	0	0	0	0	0	0	0	0	0	0	0	0	0	0	0	0	0	0	0	0
231005	Gaucher Disease, Type Iiic	0	0	0	0	0	0	0	0	0	0	0	0	0	0	0	0	0	0	0	0	0	0	0	0
PS231200	Bleeding disorder, platelet-type	0	0	0	0	0	0	0	0	0	0	0	0	0	0	0	0	0	0	0	0	0	2	0	0
278000	Lysosomal Acid Lipase Deficiency	0	0	0	0	0	0	1	0	0	0	0	0	0	0	0	0	0	0	0	0	0	0	0	0
618268	Trichohepatoneurodevelopmental Syndrome	0	0	0	0	0	0	1	3	0	0	0	0	0	0	0	0	0	6	0	0	1	2	1	0
PS249000	Meckel syndrome	0	0	0	0	0	0	0	0	0	0	0	0	0	0	0	0	0	0	0	0	0	0	0	0
PS201000	Carpenter syndrome	0	0	0	0	0	0	0	0	0	0	0	0	0	0	0	0	0	0	0	0	0	0	0	0
230900	Gaucher Disease, Type Ii	0	0	0	0	0	6	1	0	3	1	3	7	0	1	1	0	0	2	0	6	5	0	0	5
PS306400	Granulomatous disease, chronic	0	0	0	2	0	18	0	0	8	9	29	13	0	17	7	0	0	112	5	9	6	0	3	3
205400	Tangier Disease	0	0	0	0	0	1	0	1	0	0	0	1	0	0	0	0	0	0	0	0	0	0	0	0
232500	Glycogen Storage Disease Iv	0	0	0	0	0	0	0	0	0	0	0	0	0	0	1	0	0	0	0	0	0	0	0	0
314050	Thrombocytopenia With Beta-thalassemia, X-linked	0	0	0	0	0	0	0	0	0	0	0	0	0	0	0	0	0	0	0	0	0	0	0	0
610293	Glycosylphosphatidylinositol Deficiency	0	0	0	0	0	0	0	0	0	0	0	0	0	0	0	0	0	0	1	0	0	0	0	0
613385	Autoimmune Disease, Multisystem, With Facial Dysmorphism	0	0	0	0	0	0	0	0	0	0	0	0	0	1	0	0	0	0	0	0	0	0	0	0
185070	Stormorken Syndrome	0	0	0	0	0	0	0	0	0	0	0	0	0	0	0	0	0	0	0	0	0	0	0	0
602361	Gracile Bone Dysplasia	0	0	0	0	0	0	0	0	0	0	0	0	0	0	0	0	0	0	0	0	0	0	0	0
617053	Mirage Syndrome	0	0	0	0	0	0	0	0	0	0	0	0	0	0	0	0	0	0	0	0	0	0	0	0
170100	Prolidase Deficiency	0	0	0	0	0	0	0	1	0	0	0	0	0	1	0	0	0	0	0	0	0	0	0	0
PS212066	Congenital disorders of glycosylation, type II	0	0	0	0	0	0	0	0	0	0	0	0	0	0	0	0	0	0	0	0	0	1	0	0
230800	Gaucher Disease, Type I	0	0	0	0	0	6	1	0	3	1	3	7	0	1	1	0	0	2	0	6	5	0	0	5
228000	Farber Lipogranulomatosis	0	0	0	0	0	1	0	0	0	0	0	0	0	0	0	0	0	0	0	0	0	0	0	0
614979	Splenomegaly, Cytopenia, And Vision Loss	0	0	0	0	0	0	0	0	0	0	0	0	0	0	0	0	0	0	0	0	0	0	0	0
617068	Portal Hypertension, Noncirrhotic	0	0	0	0	0	0	1	0	0	0	0	0	0	0	0	0	0	0	0	0	0	1	0	0
268300	Roberts Syndrome	0	0	0	0	0	0	0	0	0	0	0	0	0	0	0	0	0	0	0	0	0	0	0	0
PS300755	Immunodeficiency (Select Examples)	0	0	0	1	0	0	0	0	1	2	0	0	0	1	1	0	0	0	0	0	0	0	0	1
PS607634	Osteopetrosis, autosomal dominant	0	0	0	0	0	0	0	0	0	0	3	0	0	0	0	0	0	0	0	0	0	0	0	0
PS308240	Lymphoproliferative syndrome	0	2	2	6	0	1	0	0	1	8	0	0	8	19	18	0	0	1	19	15	2	1	12	24
PS256100	Nephronophthisis	0	0	0	0	0	0	0	0	0	0	0	0	0	0	0	0	0	0	0	0	0	0	0	0
616689	Dehydrated Hereditary Stomatocytosis 2	0	0	0	0	0	0	0	0	0	0	0	0	0	0	0	0	0	0	0	0	0	0	0	0
603554	Omenn Syndrome	0	1	0	15	0	5	9	1	103	24	5	3	31	43	69	0	0	2	44	17	9	0	15	40
238600	Hyperlipoproteinemia, Type I	0	0	0	0	0	0	0	0	0	0	0	0	0	0	0	0	0	0	0	0	0	0	0	0
611804	Elliptocytosis 1	0	0	0	0	0	0	0	17	0	0	0	0	0	0	0	0	0	0	0	0	0	0	0	0
260920	Hyper-igd Syndrome	0	0	0	0	0	1	0	0	0	1	6	0	0	4	2	0	0	0	0	0	0	0	1	0
606003	Transaldolase Deficiency	0	0	0	0	0	0	0	0	0	0	0	0	0	0	0	0	0	0	0	0	0	0	0	0
PS212065	Congenital disorders of glycosylation, type I	0	0	0	0	0	0	0	0	0	0	0	0	0	0	0	0	0	1	1	0	0	1	0	0
230000	Fucosidosis	0	0	0	0	0	0	0	0	0	0	0	0	0	0	0	0	0	0	0	0	0	0	0	0
604173	Poikiloderma With Neutropenia	0	0	0	0	0	0	0	0	0	0	0	0	0	0	0	0	0	0	0	0	0	0	0	0
602782	Histiocytosis-lymphadenopathy Plus Syndrome	0	0	0	0	0	1	0	0	0	0	0	0	0	0	0	0	0	0	0	0	0	0	0	0
618398	T-cell Lymphoma, Subcutaneous Panniculitis-like	0	0	0	1	0	0	0	0	0	1	0	0	8	1	0	0	0	0	4	0	1	0	0	46
269600	Sea-blue Histiocyte Disease	0	0	0	0	0	0	0	0	0	0	0	0	0	0	0	0	0	0	0	0	0	0	0	0
PS603041	Mitochondrial DNA depletion syndrome	0	0	0	0	0	0	0	0	0	0	0	0	0	0	0	0	0	0	0	0	0	0	0	0
256550	Neuraminidase Deficiency	0	0	0	1	0	0	0	1	0	0	0	0	0	0	0	0	0	1	1	2	0	2	0	0
617394	Sclerosing Cholangitis, Neonatal	0	0	0	0	0	0	0	0	0	0	0	0	0	0	0	0	0	0	0	0	0	0	0	0
266200	Pyruvate Kinase Deficiency Of Red Cells	0	0	0	0	0	0	0	0	0	0	0	0	0	0	0	0	0	0	0	0	0	0	0	0
616452	B-cell Expansion With Nfkb And T-cell Anergy	0	0	0	0	0	0	0	0	0	0	0	0	0	0	0	0	0	0	0	0	0	0	0	0
614480	Hypertriglyceridemia, Transient Infantile	0	0	0	0	0	0	0	0	0	0	0	0	0	0	0	0	0	0	0	0	0	0	0	0
PS210250	Sitosterolemia	0	0	0	0	0	0	0	0	0	0	0	0	0	0	0	0	0	0	0	0	0	0	0	0
618280	Cardiac-urogenital Syndrome	0	0	0	0	0	0	0	0	0	0	0	0	0	0	0	0	0	0	0	0	0	0	0	0
603909	Autoimmune Lymphoproliferative Syndrome, Type Iia	0	0	0	0	0	0	0	0	0	0	0	0	0	0	0	0	0	0	0	0	0	0	0	0
PS613658	Rajab interstitial lung disease with brain calcifications	0	0	0	0	0	0	0	0	0	0	0	0	0	0	0	0	0	0	0	0	0	0	0	0
265380	Alveolar Capillary Dysplasia With Misalignment Of Pulmonary Veins	0	0	0	0	0	0	0	0	0	0	0	0	0	0	0	0	0	0	0	0	0	0	0	0
PS179800	Distal renal tubular acidosis	0	0	0	0	0	0	0	2	0	0	0	0	0	0	0	0	0	0	0	1	0	0	0	0
PS164280	Feingold syndrome	0	0	0	0	0	0	0	0	0	0	0	0	0	0	0	0	0	0	0	0	0	0	0	0
216400	Cockayne Syndrome, Type A	0	0	0	0	0	0	0	0	0	0	0	0	0	1	1	0	0	0	0	0	0	0	0	0
618892	Harderoporphyria	0	0	0	0	0	0	0	0	0	0	0	0	0	0	0	0	0	0	0	0	0	0	0	0

## Sheet: Tongue
Supplementary File 3E. Names of disease and cell type co-appearance in PubMed records in tongue.
Disease\Phenotypic series accession (OMIM)	Disease\Phenotypic series name	basal cell	capillary endothelial cell	endothelial cell of artery	endothelial cell of lymphatic vessel	epithelial cell	fibroblast	immune cell	keratinocyte	pericyte cell	schwann cell	tongue muscle cell	vein endothelial cell
618732	Poirier-bienvenu Neurodevelopmental Syndrome	0	0	0	0	0	0	0	0	0	0	0	0
PS610253	Kleefstra syndrome	0	0	0	0	0	0	0	0	0	0	0	0
257980	Odontoonychodermal Dysplasia	0	0	0	0	0	0	0	0	0	0	0	0
PS210600	Seckel syndrome	0	0	0	0	0	0	0	0	0	0	0	0
311900	Tarp Syndrome	0	0	0	0	0	0	0	0	0	0	0	0
PS614675	Bone marrow failure syndrome	1	0	0	0	0	5	0	0	0	0	0	0
618170	Neurodegeneration, Childhood-onset, Stress-induced, With Variable Ataxia And Seizures	0	0	0	0	0	0	0	0	0	0	0	0
PS254800	Epilepsy, progressive myoclonic	0	0	0	0	0	0	0	1	0	1	1	0
614325	Pitt-hopkins-like Syndrome 2	0	0	0	0	0	0	0	0	0	0	0	0
271150	Spinal Muscular Atrophy, Type Iv	0	0	0	0	0	0	0	0	0	0	0	0
PS211530	Brown-Vialetto-Van Laere syndrome	0	0	0	0	0	0	0	0	0	0	0	0
151050	Lenz-majewski Hyperostotic Dwarfism	0	0	0	0	0	0	0	0	0	0	0	0
PS213200	Spinocerebellar ataxia, autosomal recessive	1	0	0	0	0	0	0	0	0	1	0	0
PS135900	Coffin-Siris syndrome	0	0	0	0	0	0	0	0	0	0	0	0
PS615419	Hypotonia, infantile, with psychomotor retardation and characteristic facies	0	0	0	0	0	0	0	0	0	0	0	0
613630	Cocoon Syndrome	0	0	0	0	0	0	0	0	0	0	0	0
PS609308	Muscular dystrophy-dystroglycanopathy, type C	0	0	0	0	0	0	0	0	0	0	0	0
PS602483	Auriculocondylar syndrome	0	0	0	0	0	0	0	0	0	0	0	0
260660	Pelviscapular Dysplasia	0	0	0	0	0	0	0	0	0	0	0	0
253550	Spinal Muscular Atrophy, Type Ii	0	0	0	0	0	0	0	0	0	1	0	0
277380	Methylmalonic Aciduria And Homocystinuria, Cblf Type	0	0	0	0	0	0	0	0	0	0	0	0
309580	Mental Retardation-hypotonic Facies Syndrome, X-linked, 1	0	0	0	0	0	0	0	0	0	0	0	0
PS609060	Combined oxidative phosphorylation deficiency	0	2	3	0	1	0	0	0	2	1	1	6
PS105400	Amyotrophic lateral sclerosis	1	1	0	0	0	0	0	0	3	5	9	0
618021	Tetraamelia Syndrome 2	0	0	0	0	0	0	0	0	0	0	0	0
PS309800	Microphthalmia, syndromic	0	0	0	0	0	0	0	0	0	0	0	1
274400	Thyroid Hormonogenesis, Genetic Defect In, 1	0	0	0	0	0	0	0	0	0	0	0	0
PS268310	Robinow syndrome	0	0	0	1	0	0	0	0	0	0	0	0
PS158350	Cowden disease	1	0	0	0	0	0	0	0	1	1	0	0
614501	Psychomotor Retardation, Epilepsy, And Craniofacial Dysmorphism	0	0	0	0	0	0	0	0	0	0	0	0
PS607596	Pontocerebellar hypoplasia	0	0	0	0	0	0	0	0	0	0	0	0
130650	Beckwith-wiedemann Syndrome	0	0	0	0	0	0	0	0	1	0	2	0
253300	Spinal Muscular Atrophy, Type I	0	0	0	0	0	0	0	0	1	0	0	0
612938	Growth Retardation, Developmental Delay, Coarse Facies, And Early	0	0	0	0	0	0	0	0	0	0	0	0
248500	Mannosidosis, Alpha B, Lysosomal	0	0	0	0	0	0	0	0	1	0	0	0
269150	Schinzel-giedion Midface-retraction Syndrome	0	0	0	0	0	0	0	0	0	0	0	0
301830	Spinal Muscular Atrophy, X-linked 2	0	0	0	0	0	0	0	0	0	0	0	0
PS214100	Peroxisome biogenesis disorder	0	0	2	0	1	0	0	0	0	0	1	1
PS162400	Hereditary sensory and autonomic neuropathy	0	0	0	0	0	2	0	0	0	18	0	0
PS256040	Proteosome-associated autoinflammatory syndrome	0	0	0	0	0	0	0	0	0	0	0	0
PS156200	Mental retardation, autosomal dominant	0	0	0	0	0	0	0	0	0	0	0	0
608800	Sudden Infant Death With Dysgenesis Of The Testes Syndrome	0	0	0	0	0	0	0	0	0	0	0	0
303400	Cleft Palate, X-linked	0	0	0	0	0	0	0	0	0	0	0	0
PS147060	Hyper-IgE recurrent infection syndrome	0	0	0	0	0	0	0	0	0	0	0	0
606353	Primary Lateral Sclerosis, Juvenile	0	0	0	0	0	0	0	0	0	0	0	0
301040	Alpha-thalassemia/mental Retardation Syndrome, Nondeletion Type, X-linked	0	0	0	0	0	0	0	0	0	0	0	0
PS607014	Mucopolysaccharidoses	2	0	1	0	2	11	0	0	9	5	1	0
PS607095	Anauxetic dysplasia	0	0	0	0	0	0	0	0	0	0	0	0
PS242860	Immunodeficiency-centromeric instability-facial anomalies	0	0	0	0	0	0	0	0	0	0	0	0
PS311200	Orofaciodigital syndrome	2	0	0	0	0	0	0	0	0	0	1	0
259775	Raine Syndrome	0	0	0	0	0	0	0	0	0	0	0	0
616789	Mental Retardation And Distinctive Facial Features With Or Without Cardiac Defects	0	0	0	0	0	0	0	0	0	0	0	0
PS213300	Joubert syndrome	4	0	0	0	0	0	0	0	0	0	0	0
PS135500	Zimmermann-Laband syndrome	0	0	0	0	0	0	0	0	0	0	0	0
617303	Mucopolysaccharidosis-plus Syndrome	0	0	0	0	0	0	0	0	0	0	0	0
PS239300	Hyperphosphatasia with mental retardation syndrome	0	0	0	0	0	0	0	0	0	0	0	0
252500	Mucolipidosis Ii Alpha/beta	0	0	0	0	1	5	0	0	2	1	0	0
PS309510	Mental retardation, X-linked syndromic	0	0	0	0	1	1	0	0	3	1	0	0
PS236670	Muscular dystrophy-dystroglycanopathy, type A	0	0	0	0	0	0	0	0	0	0	0	0
241800	Hypothalamic Hamartomascongenital Hypothalamic Hamartoma Syndrome, Included	0	0	0	0	0	0	0	0	0	0	0	0
202650	Agnathia-otocephaly Complex	0	0	0	0	0	0	0	0	0	0	0	0
232300	Glycogen Storage Disease Ii	0	0	0	0	0	1	0	0	0	1	2	0
602535	Marshall-smith Syndrome	0	0	0	0	0	0	0	0	0	0	0	0
268800	Sandhoff Disease	0	1	1	0	0	0	0	1	2	1	0	1
PS108120	Arthrogryposis, distal	0	0	0	0	0	0	0	0	0	1	0	0
PS164400	Spinocerebellar ataxia	3	0	0	0	1	11	0	0	1	6	1	0
616145	Catel-manzke Syndrome	0	0	0	0	0	0	0	0	0	0	0	0
201100	Acrodermatitis Enteropathica, Zinc-deficiency Type	0	0	0	0	0	2	0	0	0	0	0	0
PS148210	Keratitis-ichthyosis-deafness syndrome	0	0	0	0	0	0	0	0	0	0	0	0
159950	Spinal Muscular Atrophy With Progressive Myoclonic Epilepsy	0	0	0	0	0	0	0	0	0	0	0	0
618440	Oculoskeletodental Syndrome	0	0	0	0	0	0	0	0	0	0	0	0
616260	Tenorio Syndrome	0	0	0	0	0	0	0	0	0	0	0	0
618276	Neurodegeneration, Childhood-onset, With Cerebellar Atrophy	0	0	0	0	0	0	0	0	0	0	0	0
PS253600	Muscular dystrophy, limb-girdle, autosomal recessive	0	0	0	0	0	0	0	1	0	0	0	0
117650	Cerebrocostomandibular Syndrome	0	0	0	0	0	0	0	0	0	0	0	0
253400	Spinal Muscular Atrophy, Type Iii	0	0	0	0	0	0	0	0	0	1	0	0
617193	Encephalopathy, Progressive, Early-onset, With Brain Atrophy And Thin Corpus Callosum	0	0	0	0	0	0	0	0	0	0	0	0
254940	Carey-fineman-ziter Syndrome	0	0	0	0	0	0	0	0	0	0	0	0
PS114580	Familial candidiasis	0	0	0	0	2	0	0	0	0	0	0	0
617107	Thauvin-robinet-faivre Syndrome	0	0	0	0	0	0	0	0	0	0	0	0
PS118220	Charcot-Marie-Tooth disease	0	0	0	0	0	0	0	0	1	270	0	0
PS167200	Pachyonychia congenita	0	0	0	0	0	0	0	1	0	0	0	0
312870	Simpson-golabi-behmel Syndrome, Type 1	2	0	0	0	0	0	0	0	0	0	0	0
618143	Glycosylphosphatidylinositol Biosynthesis Defect 18	0	0	0	0	0	0	0	0	0	0	0	0
618797	Neurodevelopmental Disorder With Hypotonia, Neonatal Respiratory Insufficiency, And Thermodysregulation	0	0	0	0	0	0	0	0	0	0	0	0
251900	Mitochondrial Myopathy, Episodic, With Optic Atrophy And Reversible Leukoencephalopathy	0	0	0	0	0	0	0	0	0	0	0	0
618823	Myopathy, Congenital Proximal, With Minicore Lesions	0	0	0	0	0	0	0	0	0	0	0	0
261740	Glycogen Storage Disease Of Heart, Lethal Congenital	0	0	0	0	0	0	0	0	0	0	0	0
612289	Fontaine Progeroid Syndrome	0	0	0	0	0	0	0	0	0	0	0	0
PS208500	Short-rib thoracic dysplasia	0	0	0	0	0	0	0	0	0	0	0	0
618822	Myopathy, Congenital, With Respiratory Insufficiency And Bone Fractures	0	0	0	0	0	0	0	0	0	0	0	0
PS613038	Pituitary hormone deficiency, combined	1	1	0	0	0	0	0	0	0	0	0	0
PS219000	Fraser syndrome	1	0	0	0	0	0	0	0	0	0	0	0
270400	Smith-lemli-opitz Syndrome	0	0	0	0	0	0	0	1	0	0	0	0
618268	Trichohepatoneurodevelopmental Syndrome	0	0	0	0	0	0	0	0	0	0	0	0
PS249000	Meckel syndrome	1	0	0	0	0	0	0	0	0	0	0	0
217085	Congenital Heart Defects, Hamartomas Of Tongue, And Polysyndactyly	0	0	0	0	0	0	0	0	0	0	0	0
PS275200	Hypothyroidism, congenital, nongoitrous	0	0	0	0	0	0	0	0	0	0	0	0
PS308350	Developmental and epileptic encephalopathy	2	0	1	0	0	0	0	0	1	1	0	0
208400	Aspartylglucosaminuria	0	0	0	0	0	0	0	0	1	0	0	0
618356	Neurodevelopmental Disorder With Central And Peripheral Motor Dysfunction	0	0	0	0	0	0	0	0	0	2	0	0
618729	Liang-wang Syndrome	0	0	0	0	0	0	0	0	0	0	0	0
218040	Costello Syndrome	0	0	0	0	0	1	0	1	0	0	0	0
602361	Gracile Bone Dysplasia	0	0	0	0	0	0	0	0	0	0	0	0
PS177900	Psoriasis	1	3	0	1	0	4	1	89	0	0	0	0
PS187300	Telangiectasia, hereditary hemorrhagic	0	7	17	2	0	0	0	0	15	0	1	11
105830	Angelman Syndrome	0	0	0	0	0	0	0	1	0	0	0	0
PS212066	Congenital disorders of glycosylation, type II	0	0	0	0	0	0	0	0	0	0	0	0
616975	Neurodevelopmental Disorder With Or Without Anomalies Of The Brain, Eye, Or Heart	0	0	0	0	0	0	0	0	0	0	0	0
234500	Hartnup Disorder	0	0	0	0	0	0	0	0	0	0	0	0
230000	Fucosidosis	0	0	0	0	0	1	0	0	2	3	0	0
PS220210	Ritscher-Schinzel syndrome	0	0	0	0	0	0	0	0	0	0	0	0
253250	Mulibrey Nanism	0	0	0	0	0	0	0	0	0	0	0	0
PS603041	Mitochondrial DNA depletion syndrome	0	0	0	0	0	0	0	0	0	1	1	0
PS613155	Muscular dystrophy-dystroglycanopathy, type B	0	0	0	0	0	0	0	0	0	0	0	0
146510	Pallister-hall Syndrome 1	0	0	0	0	0	0	0	0	0	0	0	0
601559	Stuve-wiedemann Syndrome	0	0	0	0	0	0	0	0	0	0	0	0
616367	Mandibulofacial Dysostosis With Alopecia	0	0	0	0	0	0	0	0	0	0	0	0

## Sheet: Trachea
Supplementary File 3F. Names of disease and cell type co-appearance in PubMed records in trachea.
Disease\Phenotypic series accession (OMIM)	Disease\Phenotypic series name	goblet cell	b cell	basal cell	cd4-positive, alpha-beta t cell	cd8-positive, alpha-beta t cell	ciliated cell	connective tissue cell	double-positive, alpha-beta thymocyte	endothelial cell	fibroblast	ionocyte	macrophage	mast cell	mucus secreting cell	neutrophil	plasma cell	secretory cell	serous cell of epithelium of trachea	smooth muscle cell	t cell
139210	Myhre Syndrome	0	0	0	0	0	0	0	0	0	0	0	0	0	0	0	0	0	0	0	0
218040	Costello Syndrome	0	0	0	0	0	0	0	0	0	1	0	0	0	0	0	0	0	0	0	0
300373	Osteopathia Striata With Cranial Sclerosis	0	0	0	0	0	0	0	0	0	0	0	0	0	0	0	0	0	0	0	0
214800	Charge Syndrome	0	0	0	0	0	0	0	0	1	0	0	0	0	0	0	0	1	0	0	0
616368	Chops Syndrome	0	0	0	0	0	0	0	0	0	0	0	0	0	0	0	0	0	0	0	0
617180	Chitayat Syndrome	0	0	0	0	0	0	0	0	0	0	0	0	0	0	0	0	0	0	1	0
PS305620	Frontometaphyseal dysplasia	0	0	0	0	0	0	0	0	0	0	0	0	0	0	0	0	0	0	0	0
618454	Developmental Delay With Or Without Dysmorphic Facies And Autism	0	0	0	0	0	0	0	0	0	0	0	0	0	0	0	0	0	0	0	0
PS607014	Mucopolysaccharidoses	0	0	2	0	0	0	12	0	0	11	0	1	0	2	0	4	2	0	1	0
PS227650	Fanconi anemia	0	2	2	1	0	0	0	0	1	10	0	0	0	0	1	1	0	0	0	0
608022	Diaphanospondylodysostosis	0	0	0	0	0	0	0	0	0	0	0	0	0	0	0	0	0	0	0	0
PS231050	Geleophysic dysplasia	0	0	0	0	0	0	0	0	0	0	0	0	0	0	0	0	0	0	0	0
117650	Cerebrocostomandibular Syndrome	0	0	0	0	0	0	0	0	0	0	0	0	0	0	0	0	0	0	0	0
114290	Campomelic Dysplasia	0	0	0	0	0	0	0	0	0	0	0	0	0	0	0	0	0	0	1	0
616875	Cerebellar Atrophy, Visual Impairment, And Psychomotor Retardation	0	0	0	0	0	0	0	0	0	0	0	0	0	0	0	0	0	0	0	0
PS118220	Charcot-Marie-Tooth disease	0	0	0	0	0	0	0	0	0	0	0	0	0	0	0	0	5	0	0	0
PS617660	Vertebral, cardiac, renal, and limb defects syndrome	0	0	0	0	0	0	0	0	0	0	0	0	0	0	0	0	0	0	0	0
PS184255	Spondylometaphyseal dysplasia	0	0	0	0	0	0	0	0	0	0	0	0	0	0	0	0	0	0	0	0
215140	Hydrops-ectopic Calcification-moth-eaten Skeletal Dysplasia	0	0	0	0	0	0	0	0	0	0	0	0	0	0	0	0	0	0	0	0
PS224690	Meier-Gorlin syndrome	0	0	0	0	0	0	0	0	0	0	0	0	0	0	0	0	0	0	0	0
PS601390	Van Maldergem syndrome	0	0	0	0	0	0	0	0	0	0	0	0	0	0	0	0	0	0	0	0
PS236680	Hydrolethalus syndrome	0	0	1	0	0	0	0	0	0	0	0	0	0	0	0	0	0	0	0	0
202650	Agnathia-otocephaly Complex	0	0	0	0	0	0	0	0	0	0	0	0	0	0	0	0	0	0	0	0
212720	Martsolf Syndrome	0	0	0	0	0	0	0	0	0	0	0	0	0	0	0	0	0	0	0	0
101600	Pfeiffer Syndrome	0	0	0	0	0	0	0	0	1	0	0	0	0	0	0	0	0	0	0	0
271510	Spondyloepimetaphyseal Dysplasia, Sponastrime Type	0	0	0	0	0	0	0	0	0	0	0	0	0	0	0	0	0	0	0	0
302960	Chondrodysplasia Punctata 2, X-linked Dominant	0	0	0	0	0	0	1	0	0	1	0	0	0	0	0	1	0	0	0	0
618547	Neurodevelopmental Disorder With Visual Defects And Brain Anomalies	0	0	0	0	0	0	0	0	0	0	0	0	0	0	0	0	0	0	0	0
314390	Vacterl Association With Hydrocephalus, X-linked	0	0	0	0	0	0	0	0	0	0	0	0	0	0	0	0	0	0	0	0
150250	Larsen Syndrome, Autosomal Dominant	0	0	0	0	0	0	0	0	0	0	0	0	0	0	0	0	0	0	0	0
PS123700	Cutis laxa	0	0	0	0	0	0	9	0	0	2	0	0	0	0	1	0	0	0	0	0
101200	Apert Syndrome	0	0	0	0	0	0	0	0	0	0	0	0	0	0	0	0	0	0	0	0
619083	Delpire-mcneill Syndrome	0	0	0	0	0	0	0	0	1	0	0	0	3	0	6	0	0	0	0	0
271665	Spondylometaepiphyseal Dysplasia, Short Limb-hand Type	0	0	0	0	0	0	0	0	0	0	0	0	0	0	0	0	0	0	0	0
222600	Diastrophic Dysplasia	0	0	0	0	0	0	0	0	0	0	0	0	0	0	0	0	0	0	0	0
265380	Alveolar Capillary Dysplasia With Misalignment Of Pulmonary Veins	0	0	0	0	0	0	0	0	0	0	0	0	0	0	0	0	0	0	5	0
PS164280	Feingold syndrome	0	0	0	0	0	0	0	0	0	0	0	0	0	0	0	0	0	0	0	0
PS219000	Fraser syndrome	0	0	1	0	0	1	0	0	0	0	0	0	0	0	0	0	0	0	1	0
PS300000	Opitz GBBB syndrome	0	0	0	0	0	0	0	0	0	0	0	0	0	0	0	0	0	0	0	0
