# Supplementary material for: Affected cell types for hundreds of Mendelian diseases revealed by analysis of human and mouse single-cell data
Source: eLife. 2024 Jan 10;13:e84613. doi: 10.7554/eLife.84613 (PMC10830129; doi:10.7554/eLife.84613)
Supplement: Supplementary file 4. [file elife-84613-supp4.xlsx]

## Sheet: Supplementary File 4
Supplementary File 4. Mouse cell clusters annotations.
All mouse cell cluster annotations appear in 4A in a tab named "Summary". Data per tissue appear in distinct tabs, as follows: 4B Bone marrow, 4C Lung, 4D Skeletal muscle, 4E Spleen, 4F Tongue, and 4G Trachea.

## Sheet: Summary
Supplementary File 4A. Summary of mouse cell clusters annotations across tissues.
Tissue	Cluster no.	Cell type name (Free annotation)	Cell Ontology term	Cell Ontology accession	Cell type markers	PMID accession of cell type markers	Tabula Muris annotation
Bone marrow	1	Proerythroblasts	proerythroblast	CL:0000547	Epor, Tal1, Gata1, Tfrc	22848149
Bone marrow	2	Reticulocytes	reticulocyte	CL:0000558	Hba-a1, Hba-a2	22848149	Erythroblasts
Bone marrow	3	Erythroblasts	erythroblast	CL:0000765	Tal1, Cd36, Tfrc, Hba-a1, Hba-a2, Gypa	22848149
Bone marrow	4	Plasma cells	plasma cell	CL:0000786	Tnfrsf17, Sdc1, Cd44, Itga4, Itgb1, Cd93, Cxcr4	30505309
Bone marrow	5	Early pro-B cells	early pro-B cell	CL:0002046	Cd79a; Rag1, Spn, Bst1, Cd24a(med)	31849931; 27456481	Early pro-B cells
Bone marrow	6	Pre-B cells	precursor B cell	CL:0000817	Cd79a; Sell(med), Bst1, Ly6d(med), Cd24a(high), Cd22(med)	31849931; 27456481
Bone marrow	7	Immature B cells	immature B cell	CL:0000816	Cd79a; Rag1, Sell(med), Ly6d(high), Cd24a(high), Cd2 (med)	31849931; 27456481
Bone marrow	8	Basophils	basophil	CL:0000767			Basophils
Bone marrow	9	Myelocytes	myelocyte	CL:0002193	Cd24a, Itgam(low), Fcgr4(low), Plaur(low), Cd34(med), Itga4	33936029
Bone marrow	10	Hematopoietic stem and progenitor cells	hematopoietic stem cell	CL:0000037	Cd34, Myct1, Angpt1	33277618
Bone marrow	11	Macrophages	macrophage	CL:0000235			Macrophages
Bone marrow	12	T cells	T cell	CL:0000084			T cells
Bone marrow	13	Mature B cells	mature B cell	CL:0000785	Cd79a; Sell(high), Ly6d(high), Cd24a(med), Cd2(high), Cd22(high), Ly86	31849931; 27456481
Bone marrow	14	Monocytes	monocyte	CL:0000576	Cd14, Cx3cr1, Fcgr4(neg)
Bone marrow	15	Conventional dendritic cells	conventional dendritic cell	CL:0000990	Cx3cr1, Flt3, Csf1r; Irf8, Irf(neg)	25553392; 29313948
Bone marrow	16	Promyelocytes	promyelocyte	CL:0000836	Itgb2, Cd24a(low), Itgam(low), Cd177(low), Fcgr4(low), Plaur(low), Itga4	33936029
Bone marrow	17	Myeloblasts	neutrophilic myeloblast	CL:0000042	Cxcr4, Itgb2, Cd24a(low), Itgam(low), Cd177(low), Fcgr4(low), Plaur(low), Cd34(low), Itga4	33936029
Bone marrow	18	Metamyelocytes	neutrophilic metamyelocyte	CL:0000582	Itgb2, Cd24a, Itgam, Cd177, Plaur(low), Cd34(low), Itga4(low)	33936029
Bone marrow	19	Bands	band form neutrophil	CL:0000560	Itgb2, Cd24a, Itgam, Cd177, Plaur, Cd34(low), Itga4(low)	33936029
Bone marrow	20	Segmented neutrophils	segmented neutrophil of bone marrow	CL:0011114	Fcgr4, Cxcr2, Cxcr4, Itgam, Sell; Cxcr2, Itgb2, Cd24a, Itgam, Cd177, Fcgr4, Plaur, Cd34(low), Itga4(low)	29515456; 33936029
Lung	1	Ciliated columnar epithelial cells	ciliated epithelial cell	CL:0000067			Ciliated columnar epithelial cells
Lung	2	Ionocyte & pneumocytes type 2	pulmonary ionocyte; type II pneumocyte	CL:0017000; CL:0002063	Cftr; Muc1	30069046 & 30069044; 9850098	Type II pneumocytes
Lung	3	Arterial endothelial cell	pulmonary artery endothelial cell	CL:1001568	Pecam1 and Vwf	16234507
Lung	4	Capillary alveolar endothelial cell	capillary endothelial cell	CL:0002144	Pecam1; Car4	16234507; 8279579
Lung	5	Pericyte	pericyte cell	CL:0000669	Pdgfrb; Pdgfrb and Vtn	29934496; 30129931
Lung	6	B cells	B cell	CL:0000236			B cells
Lung	7	Neutrophils	neutrophil	CL:0000775	Itgam, Sell, Cxcr2, and Cxcr4	30886615
Lung	8	Alveolar macrophages (Dust cells)	alveolar macrophage	CL:0000583			Alveolar macrophages
Lung	9	Classical monocyte	classical monocyte	CL:0000860	Ptprc, Csf1r, and Cd68; Fcgr4(-); Cd86	29545365; 31543877; 29669565
Lung	10	Non-classical monocyte	non-classical monocyte	CL:0000875	Ptprc, Csf1r, and Cd68; Fcgr4; Cd86(-)	29545365; 31543877; 29669565	Non-classical monocyte
Lung	11	Non-B lymphocytes	lymphocyte	CL:0000542	Cd2; Ets1	12369898; 12542798
Lung	12	Myofibroblast	myofibroblast cell	CL:0000186	Aspn, Mustn1, Tagln, Acta2, Hhip, Enpp2, Igfbp3, Grem2, Lum, Bmp5, and Mustn1	29590628
Lung	13	Matrix Col13a1 fibroblast	fibroblast	CL:0000057	Fn1, Eln, Vcam1, Col13a1, Itga8, Cxcl14, Npnt, Hsd11b1, Tcf21, Mfap4, Spon1, Limch1, and Cdh11	29590628
Lung	14	Matrix Col14a1 fibroblast	fibroblast	CL:0000057	Pi16, Mmp3, Clec3b, Cygb, Dcn, Rbp4, Gsn, Col14a1, Dpep1, and Fbln1	29590628
Skeletal muscle	1	Skeletal myocyte	striated muscle cell	CL:0000737	Acta1; Myoz1 and Casq1	19562689; 21364935
Skeletal muscle	2	Macrophage	macrophage	CL:0000235	Ptprc, Csf1r, and Cd68	29545365
Skeletal muscle	3	Monocyte-derived dendritic cell	monocyte-derived dendritic cell	CL:0011031	Ptprc, Ifi30, Napsa, Apoe(low), C1qa(-), C1qa(-),C1qb(-), and C1qc(-)	29545365
Skeletal muscle	4	Th17/pre-Th1 effector cell	T-helper 17 cell	CL:0000899	Ifngr2, Il18r1, Cxcr6, Ccr2	26607794
Skeletal muscle	5	Satellite cells	skeletal muscle satellite cell	CL:0000594			Satellite cells
Skeletal muscle	6	CD8 T cells	CD8-positive, alpha-beta T cell	CL:0000625	Cd3d, Cd3e, Cd3g, and Cd8a	31457092
Skeletal muscle	7	B cells	B cell	CL:0000236			B cells
Skeletal muscle	8	Lymphatic endothelial cell	endothelial cell of lymphatic vessel	CL:0002138	Lyve1; Pdpn; Mmrn1, Flt4, and Reln	10037799; 10027397; 29449267
Skeletal muscle	9	(1) Venule and (2) stalk endothelial cell	vein endothelial cell; endothelial stalk cell	(1) CL:0002543 (2) CL:0002671	(1) Nr2f2; (1) Pecam1, Emcn, Vwf, and Bace2 and (2) Pecam1, Darc, Ehd4, Il6st, Lgals3, Plscr2, Selp, Spint2, Tmem176a, Tmem176b, and Vwf	30188322; 29449267
Skeletal muscle	10	Arterial endothelial cell	endothelial cell of artery	CL:1000413	Fbln2 and Hey1; Pecam1, Sox17, and Stmn2	30188322; 29449267
Skeletal muscle	11	Capillary endothelial cell	capillary endothelial cell	CL:0002144	Cd300lg and Pecam1	29449267
Skeletal muscle	12	IFN-stimulated endothelial cell	blood vessel endothelial cell	CL:0000071	Pecam1; Ifit1, Isg15, and Cxcl10	29449267; 20943413
Skeletal muscle	13	Pericyte	pericyte cell	CL:0000669	Rgs5; Abcc9 and Kcnj8; Notch3 and Pdgfrb	12514120; 30891496; 29590628
Skeletal muscle	14	Tendon cell	tendon cell	CL:0000388	Tnmd, Scx, Col1a1, and Dcn ; Scx, Mkx, Col1a1, Tnc, and Dcn	22011320; 30609804
Skeletal muscle	15	Adipose-derived stromal cells	stromal cell	CL:0000499	Lum, Dcn, Apod, and Mgp	34283835
Skeletal muscle	16	Basement-membrane residing (/endomyseal) fibroblasts	skeletal muscle fibroblast; fibroblast	CL:0011027; CL:0000057	Col6a1, Col6a2, Col6a3; Col15a1	18219255; 7485412
Skeletal muscle	17	Matrix Col14a1 fibroblast	skeletal muscle fibroblast; fibroblast	CL:0011027; CL:0000057	Col14a1, Pi16, Clec3b, Dcn, Gsn, and Dpep1	29590628
Skeletal muscle	18	Myelinating schwann cell	myelinating Schwann cell	CL:0000218	Sox10 and S100b; Sox10 and Mpz	25536222; 30971890
Skeletal muscle	19	Smooth muscle cells	smooth muscle cell	CL:0000192	Kcnj13; Cldn1; Wnt10a; Wnt10a, Wnt6	30022023; 28292027; 30911276; 29881541
Spleen	1	Epithelial cyst cell	epithelial cell	CL:0000066	Krt15, Krt18, Krt7, Krt19, Krt8, Krt23, Krt4, Krt5, Rhd(-), and Cd34(-)	25320525
Spleen	2	Macrophage	macrophage	CL:0000235	Ptprc, Csf1r, and Cd68; Lyz1 and Fn1	29545365; 31257031
Spleen	3	Plasmacytoid dendritic cell	plasmacytoid dendritic cell	CL:0000784	Ptprc, Siglech, Cd8a, Bst2, Ccr9, Klra17, Lag3, Tlr7, Itgax(low), and Itgam(-); Siglech	23617754; 24719464	Dendritic cells
Spleen	4	Transitional type 1 B cell	T1 B cell	CL:0000958	Cd19 and Ms4a1; Cd24a and Cr2(low); Fcer2a(-)	31257031; 24719464; 16260487
Spleen	5	Mesenchymal progenitor cell	mesenchymal stem cell	CL:0000134	Mki67, Hmgb2, Top2a, Cdk1, Bub1, 2810417H13Rik, Cks2, Ube2s, Hmgn2, H2afv, and Tubb5	29590628
Spleen	6	Monocyte	monocyte	CL:0000576	Ly6c2 and Ccr2	29545365
Spleen	7	Conventional dendritic cell	conventional dendritic cell	CL:0000990	Irf8; Itgax and Cd1d1	31257031; 21750314
Spleen	8	Natural killer cells	natural killer cell	CL:0000623	Gzma; Klra8 and Ncr1	31257031; 22902830	Natural killer cells
Spleen	9	Follicular B cell	follicular B cell	CL:0000843	Cd19 and Ms4a1; Cd24a(low) and Cr2(low)	31257031; 24719464
Spleen	10	NK T cell	mature NK T cell	CL:0000814	Cd3d, Cd3e, Cd3g, and Klrb1c	18369924
Spleen	11	Marginal zone B cell	marginal zone B cell of spleen	CL:0000845	Cd19 and Ms4a1; Cd24a(low) and Cr2	31257031; 24719464	B cells
Spleen	12	RECs CD4 T cell	activated CD4-positive, alpha-beta T cell	CL:0000896	Cd4, Cd8a(-), Cd19(-), Itgam(-), Klrb1a(-), Lck, Ets1, Ikzf2, AW112010, S100a6, Nkg7, Foxp3, Cd3d, Cd3e, and Cd3g	31457092
Spleen	13	Memory CD8 T cell	CD8-positive, alpha-beta memory T cell	CL:0000909	Cd3d, Cd3e, Cd3g, and Cd8a; Cd44, Itgal, and Ly6c2	31457092; 10077622
Spleen	14	Naive CD8 T cell	naive thymus-derived CD8-positive, alpha-beta T cell	CL:0000900	Cd3d, Cd3e, Cd3g, and Cd8a; Cd44(-), Itgal(-), and Ly6c2(-)	31457092; 10077622
Spleen	15	Naive CD4 T cell	naive thymus-derived CD4-positive, alpha-beta T cell	CL:0000895	Cd3d, Cd3e, Cd3g, Cd4, Cd8a(-), Cd19(-), Itgam(-), Klrb1a(-), Lck, Ets1, Satb1, Lef1, and Sell	31457092
Tongue	1	Langerhans cells	Langerhans cell	CL:0000453			Langerhans cells
Tongue	2	Non-filiform keratinocyte	keratinocyte	CL:0000312	Sprr1a, Sprr1b, Sprr2h, Sprr2k, Sprr3(neg)	7769256
Tongue	3	Mesenchymal transit-amplifying stem cells	mesenchymal stem cell	CL:0000134	Pbk, Ncaph, Cdca2	28475038
Tongue	4	Tip of filiform papillae keratinocyte	keratinocyte	CL:0000312	Tchh, Krt14(low), Trp63(low); Sprr1a, Sprr1b, Sprr3	19038788; 7769256
Tongue	5	Basal long-term keratinocyte-comitted progenitor cells 2	basal cell	CL:0000646	Trp63, Sox2(low), Krt5, Krt14	19038788
Tongue	6	Bipotential progenitor cells	basal cell	CL:0000646	Krt14, Krt5, Trp63, Sox2	19038788
Tongue	7	Upper spinous and granular layers, bipotential-originated, keratinocyte-commited progenitor cells	basal cell	CL:0000646	Sprr1a(med), Sprr1b(med); Krt14, Krt5, Trp63(neg)	7769256; 19038788
Tongue	8	Papilla epithelium	keratinocyte	CL:0000312	Lrp4	21108386
Tongue	9	Basal long-term keratinocyte-comitted progenitor cells 3	basal cell	CL:0000646	Krt14, Krt5, Trp63, Sox2(low)	19038788
Tongue	10	Basal long-term keratinocyte-comitted progenitor cells 1	basal cell	CL:0000646	Trp63, Sox2(low), Krt5, Krt14	19038788
Trachea	1	Ciliated columnar epithelial cells	ciliated epithelial cell	CL:0000067	Tuba1a, Cdhr3	33196316
Trachea	2	Lipofibroblast	fibroblast	CL:0000057	Plin2, Lpl, Lipa, Mrc1, Ccl6, Ctss, Mpeg1, and Cybb	29590628
Trachea	3	Macrophage	macrophage	CL:0000235	Ptprc, Csf1r, and Cd68	29545365
Trachea	4	Thyroid follicular cell	thyroid follicular cell	CL:0002258	Iyd, Tg, and Tpo	30599477
Trachea	5	Club cell	club cell	CL:0000158	Scgb1a1, Scgb3a1, Scgb3a2, Trp63, and Krt5	29657097
Trachea	6	Secretory epithelial cell	glandular epithelial cell	CL:0000150	Scgb3a1; Aqp5; Dcpp1, Dcpp2, and Dcpp3	12406855; 11514581; 16954406
Trachea	7	Non-myelinating schwann cell	non-myelinating Schwann cell	CL:0002376	Mbp(low), Mpz(low), Ncam1, and Pou3f1(-); Scn7a	25859851; 12213645
Trachea	8	Myelinating schwann cell	myelinating Schwann cell	CL:0000218	Mbp, Mpz, Pou3f1, and Ncam1(-)	25859851
Trachea	9	T cell	T cell	CL:0000084	Cd3d, Cd3e, Cd3g, Ets1	31457092
Trachea	10	Mature dendritic cell	dendritic cell	CL:0000451	Itgax, H2-Eb1, H2-DMa, H2-DMb1, H2-Oa, H2-Ob, H2-Aa, H2-Ab1, Cd86, Cd8a(-), Cd40	10837075
Trachea	11	Naive dendritic cell	dendritic cell	CL:0000451	Itgax, H2-Eb1, H2-DMa, H2-DMb1, H2-Oa, H2-Ob, H2-Aa, H2-Ab1, Cd86, Cd8a(-), Cd40(-)	10837075
Trachea	12	Myofibroblast	myofibroblast cell	CL:0000186	Acta2, Myh11, Tagln, Aspn, Mustn1, and Enpp2	29590628
Trachea	13	Arterial endothelial cell	endothelial cell of artery	CL:1000413	Pecam1; Fbln2; Pecam1, Sox17, and Stmn2	16234507; 30188322; 29449267
Trachea	14	Capillary endothelial cell	capillary endothelial cell	CL:0002144	Kdr and Nrp1; Cd300lg and Pecam1; Car4	29622724; 29449267; 8279579
Trachea	15	Venule endothelial cell	vein endothelial cell	CL:0002543	Pecam1, Emcn, Vwf, and Bace2	29449267
Trachea	16	Lymphatic endothelial cell	endothelial cell of lymphatic vessel	CL:0002138	Lyve1; Pdpn; Mmrn1, Flt4, and Reln	10037799; 10027397; 29449267
Trachea	17	Chondrocytes	chondrocyte	CL:0000138	Col2a1, Col11a2, Sox9	9614107
Trachea	18	Resting Col14a1 Matrix Fibroblast	fibroblast	CL:0000057	Pi16, Clec3b, Cygb, Dcn, Gsn, Col14a1, and Fbln1	29590628
Trachea	19	Reactive Col14a1 Matrix Fibroblast	fibroblast	CL:0000057	Clec3b, Cygb, Dcn, Gsn, Col14a1, and Fbln1; Thbs4	29590628; 29729633, 21701537, and 23942617

## Sheet: Bone marrow
Supplementary File 4B. Mouse cell clusters annotations in bone marrow.
Cell index	Cluster no.	Cell Ontology term
10X_P7_2_AAACCTGCAGTAACGG	15	conventional.dendritic.cell
10X_P7_2_AAACGGGAGACCGGAT	12	T.cell
10X_P7_2_AAACGGGAGCGCTCCA	12	T.cell
10X_P7_2_AAACGGGAGGACGAAA	18	neutrophilic.metamyelocyte
10X_P7_2_AAACGGGAGGTACTCT	16	promyelocyte
10X_P7_2_AAACGGGAGGTGCTTT	20	segmented.neutrophil.of.bone.marrow
10X_P7_2_AAACGGGAGTCGAGTG	19	band.form.neutrophil
10X_P7_2_AAAGATGAGCTTCGCG	14	monocyte
10X_P7_2_AAAGATGCACTGTTAG	18	neutrophilic.metamyelocyte
10X_P7_2_AAAGATGCATCCAACA	2	reticulocyte
10X_P7_2_AAAGATGCATGCTGGC	19	band.form.neutrophil
10X_P7_2_AAAGATGCATGTTGAC	19	band.form.neutrophil
10X_P7_2_AAAGATGTCACGAAGG	19	band.form.neutrophil
10X_P7_2_AAAGATGTCTGACCTC	20	segmented.neutrophil.of.bone.marrow
10X_P7_2_AAAGCAAGTATCGCAT	17	neutrophilic.myeloblast
10X_P7_2_AAAGCAAGTCCAGTTA	18	neutrophilic.metamyelocyte
10X_P7_2_AAAGCAATCACCCTCA	9	myelocyte
10X_P7_2_AAAGCAATCATCTGTT	15	conventional.dendritic.cell
10X_P7_2_AAAGTAGAGCTAACAA	18	neutrophilic.metamyelocyte
10X_P7_2_AAAGTAGAGGACCACA	19	band.form.neutrophil
10X_P7_2_AAAGTAGCAGTATGCT	19	band.form.neutrophil
10X_P7_2_AAAGTAGGTACAGCAG	9	myelocyte
10X_P7_2_AAAGTAGGTGGCAAAC	7	immature.B.cell
10X_P7_2_AAATGCCCATAAAGGT	8	basophil
10X_P7_2_AAATGCCTCGTTACGA	10	hematopoietic.stem.cell
10X_P7_2_AACACGTAGTGAATTG	2	reticulocyte
10X_P7_2_AACACGTCAACCGCCA	5	early.pro.B.cell
10X_P7_2_AACACGTTCACAGTAC	14	monocyte
10X_P7_2_AACACGTTCAGAGGTG	18	neutrophilic.metamyelocyte
10X_P7_2_AACACGTTCAGTGTTG	19	band.form.neutrophil
10X_P7_2_AACACGTTCGTAGATC	11	macrophage
10X_P7_2_AACCATGCAAGTAATG	18	neutrophilic.metamyelocyte
10X_P7_2_AACCATGCAGATCTGT	5	early.pro.B.cell
10X_P7_2_AACCATGGTCCAAGTT	11	macrophage
10X_P7_2_AACCATGGTTGGGACA	2	reticulocyte
10X_P7_2_AACGTTGCAATAGAGT	14	monocyte
10X_P7_2_AACGTTGGTGTGAAAT	16	promyelocyte
10X_P7_2_AACGTTGTCATAACCG	6	precursor.B.cell
10X_P7_2_AACTCAGCAGTGAGTG	11	macrophage
10X_P7_2_AACTCAGGTGGCCCTA	19	band.form.neutrophil
10X_P7_2_AACTCAGGTGTGACCC	19	band.form.neutrophil
10X_P7_2_AACTCAGTCACCTTAT	18	neutrophilic.metamyelocyte
10X_P7_2_AACTCAGTCATCACCC	14	monocyte
10X_P7_2_AACTCAGTCGCCTGTT	15	conventional.dendritic.cell
10X_P7_2_AACTCCCAGATGCCAG	11	macrophage
10X_P7_2_AACTCCCCAAGTCTAC	14	monocyte
10X_P7_2_AACTCCCTCAGGCAAG	10	hematopoietic.stem.cell
10X_P7_2_AACTCTTGTTTGGCGC	18	neutrophilic.metamyelocyte
10X_P7_2_AACTGGTAGCGGATCA	1	proerythroblast
10X_P7_2_AACTGGTGTTAAGATG	8	basophil
10X_P7_2_AACTGGTGTTCTGGTA	5	early.pro.B.cell
10X_P7_2_AACTTTCAGCATCATC	14	monocyte
10X_P7_2_AACTTTCGTTATCACG	19	band.form.neutrophil
10X_P7_2_AAGACCTCACATAACC	13	mature.B.cell
10X_P7_2_AAGACCTGTCTAGTGT	19	band.form.neutrophil
10X_P7_2_AAGACCTTCTCGCTTG	5	early.pro.B.cell
10X_P7_2_AAGGAGCAGGTGTGGT	18	neutrophilic.metamyelocyte
10X_P7_2_AAGGAGCCATTAGCCA	6	precursor.B.cell
10X_P7_2_AAGGAGCGTCAAACTC	6	precursor.B.cell
10X_P7_2_AAGGAGCGTGTCAATC	3	erythroblast
10X_P7_2_AAGGCAGCAGACGCAA	18	neutrophilic.metamyelocyte
10X_P7_2_AAGGCAGGTACAGTTC	14	monocyte
10X_P7_2_AAGGCAGGTAGCACGA	14	monocyte
10X_P7_2_AAGGCAGTCCACGACG	18	neutrophilic.metamyelocyte
10X_P7_2_AAGGCAGTCGTAGGAG	12	T.cell
10X_P7_2_AAGGCAGTCTGCGACG	11	macrophage
10X_P7_2_AAGGTTCAGAGTTGGC	13	mature.B.cell
10X_P7_2_AAGGTTCCATAAAGGT	14	monocyte
10X_P7_2_AAGGTTCGTGCAGGTA	10	hematopoietic.stem.cell
10X_P7_2_AAGGTTCTCTGGCGTG	18	neutrophilic.metamyelocyte
10X_P7_2_AAGTCTGCATGTCTCC	3	erythroblast
10X_P7_2_AAGTCTGGTAATTGGA	16	promyelocyte
10X_P7_2_AAGTCTGGTCAACTGT	18	neutrophilic.metamyelocyte
10X_P7_2_AATCCAGAGAAGGACA	6	precursor.B.cell
10X_P7_2_AATCCAGCAATGCCAT	19	band.form.neutrophil
10X_P7_2_AATCGGTAGTGCGTGA	20	segmented.neutrophil.of.bone.marrow
10X_P7_2_AATCGGTTCTGCCCTA	13	mature.B.cell
10X_P7_2_ACACCAAAGAGGGCTT	19	band.form.neutrophil
10X_P7_2_ACACCAACACAGACAG	14	monocyte
10X_P7_2_ACACCAACATTCTTAC	7	immature.B.cell
10X_P7_2_ACACCAATCCGAGCCA	16	promyelocyte
10X_P7_2_ACACCCTAGCCGATTT	14	monocyte
10X_P7_2_ACACCCTAGCTTTGGT	13	mature.B.cell
10X_P7_2_ACACCCTCATTTCAGG	7	immature.B.cell
10X_P7_2_ACACCCTTCCACGCAG	14	monocyte
10X_P7_2_ACACCCTTCGAACGGA	19	band.form.neutrophil
10X_P7_2_ACACCGGAGCTAGTTC	16	promyelocyte
10X_P7_2_ACACCGGCACGTCTCT	17	neutrophilic.myeloblast
10X_P7_2_ACACCGGGTCGATTGT	5	early.pro.B.cell
10X_P7_2_ACACCGGGTGCAGACA	11	macrophage
10X_P7_2_ACACTGAAGACTACAA	13	mature.B.cell
10X_P7_2_ACACTGAAGAGACTAT	3	erythroblast
10X_P7_2_ACACTGAAGTGGTAGC	3	erythroblast
10X_P7_2_ACACTGAGTTGTGGAG	15	conventional.dendritic.cell
10X_P7_2_ACACTGATCGTCTGCT	5	early.pro.B.cell
10X_P7_2_ACACTGATCGTGACAT	20	segmented.neutrophil.of.bone.marrow
10X_P7_2_ACAGCCGCACACCGAC	12	T.cell
10X_P7_2_ACAGCCGTCGAACTGT	13	mature.B.cell
10X_P7_2_ACAGCCGTCGTTACGA	11	macrophage
10X_P7_2_ACAGCCGTCTACTTAC	11	macrophage
10X_P7_2_ACAGCTAAGGGCATGT	12	T.cell
10X_P7_2_ACAGCTACAAGGGTCA	14	monocyte
10X_P7_2_ACAGCTAGTAGCAAAT	9	myelocyte
10X_P7_2_ACATACGAGAGACTAT	3	erythroblast
10X_P7_2_ACATCAGCACCGTTGG	19	band.form.neutrophil
10X_P7_2_ACATCAGGTCTCACCT	19	band.form.neutrophil
10X_P7_2_ACATCAGTCAAGATCC	19	band.form.neutrophil
10X_P7_2_ACATCAGTCGCTAGCG	19	band.form.neutrophil
10X_P7_2_ACATGGTAGCGATCCC	12	T.cell
10X_P7_2_ACATGGTCATCAGTCA	9	myelocyte
10X_P7_2_ACATGGTTCGGATGTT	19	band.form.neutrophil
10X_P7_2_ACCAGTAAGCTAGCCC	10	hematopoietic.stem.cell
10X_P7_2_ACCAGTAAGGTGTTAA	14	monocyte
10X_P7_2_ACCAGTACATGCCTTC	19	band.form.neutrophil
10X_P7_2_ACCAGTATCAACCAAC	10	hematopoietic.stem.cell
10X_P7_2_ACCCACTCAGCCTGTG	3	erythroblast
10X_P7_2_ACCCACTGTACAGACG	7	immature.B.cell
10X_P7_2_ACCGTAAAGAACTGTA	11	macrophage
10X_P7_2_ACCGTAAAGCAACGGT	7	immature.B.cell
10X_P7_2_ACCGTAAAGCGTTTAC	19	band.form.neutrophil
10X_P7_2_ACCGTAAAGTTGAGAT	8	basophil
10X_P7_2_ACCGTAACACAGCCCA	7	immature.B.cell
10X_P7_2_ACCGTAACAGGTCTCG	6	precursor.B.cell
10X_P7_2_ACCGTAAGTCCGACGT	3	erythroblast
10X_P7_2_ACCGTAAGTCGCCATG	3	erythroblast
10X_P7_2_ACCGTAATCCTCATTA	19	band.form.neutrophil
10X_P7_2_ACCTTTAAGCGAAGGG	11	macrophage
10X_P7_2_ACCTTTAAGGTGACCA	12	T.cell
10X_P7_2_ACCTTTAGTTACCGAT	6	precursor.B.cell
10X_P7_2_ACCTTTAGTTGGACCC	14	monocyte
10X_P7_2_ACGAGCCAGCTACCTA	18	neutrophilic.metamyelocyte
10X_P7_2_ACGAGCCCAAAGGAAG	10	hematopoietic.stem.cell
10X_P7_2_ACGAGCCGTCTCCACT	3	erythroblast
10X_P7_2_ACGAGCCTCATGCATG	3	erythroblast
10X_P7_2_ACGAGCCTCTCTGCTG	18	neutrophilic.metamyelocyte
10X_P7_2_ACGAGGAAGTTAACGA	1	proerythroblast
10X_P7_2_ACGAGGACACTTGGAT	19	band.form.neutrophil
10X_P7_2_ACGAGGACATGAGCGA	17	neutrophilic.myeloblast
10X_P7_2_ACGAGGAGTCGACTGC	11	macrophage
10X_P7_2_ACGAGGATCATCATTC	9	myelocyte
10X_P7_2_ACGAGGATCCAGAGGA	6	precursor.B.cell
10X_P7_2_ACGAGGATCCGCATAA	11	macrophage
10X_P7_2_ACGATACAGCGTGTCC	2	reticulocyte
10X_P7_2_ACGATACCACTTGGAT	1	proerythroblast
10X_P7_2_ACGATACGTTTCGCTC	19	band.form.neutrophil
10X_P7_2_ACGATACTCAACACGT	17	neutrophilic.myeloblast
10X_P7_2_ACGATACTCGCAAGCC	19	band.form.neutrophil
10X_P7_2_ACGATACTCGTCCGTT	19	band.form.neutrophil
10X_P7_2_ACGATACTCTTAACCT	10	hematopoietic.stem.cell
10X_P7_2_ACGATGTAGTCTTGCA	19	band.form.neutrophil
10X_P7_2_ACGATGTCAAAGGAAG	13	mature.B.cell
10X_P7_2_ACGATGTCATCGATGT	11	macrophage
10X_P7_2_ACGCAGCAGGGATACC	4	plasma.cell
10X_P7_2_ACGCAGCAGGGCACTA	17	neutrophilic.myeloblast
10X_P7_2_ACGCAGCCACCTCGTT	1	proerythroblast
10X_P7_2_ACGCAGCCACGAGAGT	2	reticulocyte
10X_P7_2_ACGCAGCCAGTTTACG	9	myelocyte
10X_P7_2_ACGCAGCGTCTCTTAT	19	band.form.neutrophil
10X_P7_2_ACGCAGCTCAATCACG	6	precursor.B.cell
10X_P7_2_ACGCAGCTCCTTGACC	19	band.form.neutrophil
10X_P7_2_ACGCAGCTCTAGCACA	11	macrophage
10X_P7_2_ACGCCAGAGCAAATCA	14	monocyte
10X_P7_2_ACGCCAGAGTGACTCT	16	promyelocyte
10X_P7_2_ACGCCAGCAGCATACT	17	neutrophilic.myeloblast
10X_P7_2_ACGCCAGGTTCGAATC	5	early.pro.B.cell
10X_P7_2_ACGCCGAAGCTGGAAC	14	monocyte
10X_P7_2_ACGCCGATCAACACAC	9	myelocyte
10X_P7_2_ACGCCGATCAACGGGA	1	proerythroblast
10X_P7_2_ACGGAGAGTAATAGCA	1	proerythroblast
10X_P7_2_ACGGAGAGTCGAACAG	15	conventional.dendritic.cell
10X_P7_2_ACGGAGAGTTCCACGG	14	monocyte
10X_P7_2_ACGGAGAGTTGTTTGG	19	band.form.neutrophil
10X_P7_2_ACGGAGATCCAGAAGG	9	myelocyte
10X_P7_2_ACGGCCAGTTCGGGCT	11	macrophage
10X_P7_2_ACGGGCTAGAAACGCC	3	erythroblast
10X_P7_2_ACGGGCTAGATGTAAC	16	promyelocyte
10X_P7_2_ACGGGCTAGCCGCCTA	16	promyelocyte
10X_P7_2_ACGGGCTGTCGCGTGT	6	precursor.B.cell
10X_P7_2_ACGGGCTGTGTGACCC	18	neutrophilic.metamyelocyte
10X_P7_2_ACGGGCTTCCACTCCA	19	band.form.neutrophil
10X_P7_2_ACGGGCTTCCTGCTTG	7	immature.B.cell
10X_P7_2_ACGGGTCAGATATGGT	12	T.cell
10X_P7_2_ACGGGTCAGCTCTCGG	14	monocyte
10X_P7_2_ACGGGTCGTATAGGGC	12	T.cell
10X_P7_2_ACGGGTCTCTGTTGAG	14	monocyte
10X_P7_2_ACGTCAACAGCTTAAC	2	reticulocyte
10X_P7_2_ACGTCAACATGTCGAT	1	proerythroblast
10X_P7_2_ACGTCAATCAAACCGT	5	early.pro.B.cell
10X_P7_2_ACTATCTAGGTGCTTT	11	macrophage
10X_P7_2_ACTATCTCAATCACAC	9	myelocyte
10X_P7_2_ACTGAACGTACTCTCC	9	myelocyte
10X_P7_2_ACTGATGAGCCGATTT	10	hematopoietic.stem.cell
10X_P7_2_ACTGATGCAAGGTTCT	9	myelocyte
10X_P7_2_ACTGATGCAGACTCGC	14	monocyte
10X_P7_2_ACTGATGGTCCAGTAT	16	promyelocyte
10X_P7_2_ACTGATGTCAATCTCT	19	band.form.neutrophil
10X_P7_2_ACTGCTCGTTCCAACA	14	monocyte
10X_P7_2_ACTGCTCTCTTTACAC	18	neutrophilic.metamyelocyte
10X_P7_2_ACTGTCCAGAATGTGT	13	mature.B.cell
10X_P7_2_ACTGTCCAGAGTTGGC	17	neutrophilic.myeloblast
10X_P7_2_ACTGTCCAGCGATAGC	16	promyelocyte
10X_P7_2_ACTGTCCAGCTGCCCA	9	myelocyte
10X_P7_2_ACTGTCCAGGTACTCT	7	immature.B.cell
10X_P7_2_ACTGTCCCAGGGCATA	18	neutrophilic.metamyelocyte
10X_P7_2_ACTGTCCGTAGGACAC	19	band.form.neutrophil
10X_P7_2_ACTTACTCAACACCTA	19	band.form.neutrophil
10X_P7_2_ACTTGTTCACAAGCCC	19	band.form.neutrophil
10X_P7_2_ACTTTCAAGCTGTTCA	1	proerythroblast
10X_P7_2_ACTTTCAGTGACCAAG	18	neutrophilic.metamyelocyte
10X_P7_2_ACTTTCAGTTAGAACA	16	promyelocyte
10X_P7_2_ACTTTCATCCACTCCA	14	monocyte
10X_P7_2_AGAATAGAGAGGGATA	18	neutrophilic.metamyelocyte
10X_P7_2_AGAATAGAGCGTTGCC	12	T.cell
10X_P7_2_AGAATAGAGGTGACCA	19	band.form.neutrophil
10X_P7_2_AGAATAGCATTGGCGC	16	promyelocyte
10X_P7_2_AGACGTTGTAGTACCT	6	precursor.B.cell
10X_P7_2_AGACGTTTCACAGTAC	18	neutrophilic.metamyelocyte
10X_P7_2_AGAGCGACATCCTAGA	19	band.form.neutrophil
10X_P7_2_AGAGCTTAGAATTCCC	6	precursor.B.cell
10X_P7_2_AGAGCTTTCCATGAGT	14	monocyte
10X_P7_2_AGAGCTTTCCGTAGGC	19	band.form.neutrophil
10X_P7_2_AGAGTGGAGCTGCAAG	19	band.form.neutrophil
10X_P7_2_AGATCTGAGAGCTTCT	9	myelocyte
10X_P7_2_AGATCTGCACTGAAGG	2	reticulocyte
10X_P7_2_AGATCTGGTTAAGGGC	7	immature.B.cell
10X_P7_2_AGATCTGGTTGGTGGA	12	T.cell
10X_P7_2_AGATCTGTCACAGTAC	18	neutrophilic.metamyelocyte
10X_P7_2_AGATCTGTCTTGAGAC	11	macrophage
10X_P7_2_AGATTGCAGTAGCCGA	2	reticulocyte
10X_P7_2_AGATTGCCATAGGATA	16	promyelocyte
10X_P7_2_AGATTGCTCGGAAATA	16	promyelocyte
10X_P7_2_AGCAGCCAGCCACGCT	10	hematopoietic.stem.cell
10X_P7_2_AGCAGCCCAAGTTCTG	20	segmented.neutrophil.of.bone.marrow
10X_P7_2_AGCAGCCGTAAATGAC	9	myelocyte
10X_P7_2_AGCAGCCTCCAAGCCG	12	T.cell
10X_P7_2_AGCATACCAATCGAAA	12	T.cell
10X_P7_2_AGCATACGTAAGCACG	11	macrophage
10X_P7_2_AGCATACGTCCTCTTG	11	macrophage
10X_P7_2_AGCATACTCAACACGT	6	precursor.B.cell
10X_P7_2_AGCATACTCCCTTGCA	10	hematopoietic.stem.cell
10X_P7_2_AGCATACTCGTACCGG	14	monocyte
10X_P7_2_AGCCTAAAGGGTCTCC	3	erythroblast
10X_P7_2_AGCGGTCAGCGATTCT	15	conventional.dendritic.cell
10X_P7_2_AGCGGTCGTTGGAGGT	6	precursor.B.cell
10X_P7_2_AGCGTATCAGGATTGG	14	monocyte
10X_P7_2_AGCGTATGTATAGGTA	19	band.form.neutrophil
10X_P7_2_AGCGTCGCATGGTTGT	11	macrophage
10X_P7_2_AGCGTCGGTGCAGTAG	3	erythroblast
10X_P7_2_AGCGTCGTCACCGGGT	14	monocyte
10X_P7_2_AGCGTCGTCCGTAGGC	14	monocyte
10X_P7_2_AGCTCCTAGGCGATAC	14	monocyte
10X_P7_2_AGCTCCTCAACACCCG	14	monocyte
10X_P7_2_AGCTCCTGTTTGTTTC	5	early.pro.B.cell
10X_P7_2_AGCTCCTTCTAACTCT	19	band.form.neutrophil
10X_P7_2_AGCTCCTTCTACTTAC	2	reticulocyte
10X_P7_2_AGCTCTCAGAAGATTC	12	T.cell
10X_P7_2_AGCTCTCCAAGTAGTA	20	segmented.neutrophil.of.bone.marrow
10X_P7_2_AGCTCTCGTAGCGCTC	8	basophil
10X_P7_2_AGCTCTCGTCCGAAGA	13	mature.B.cell
10X_P7_2_AGCTCTCGTCTGCCAG	20	segmented.neutrophil.of.bone.marrow
10X_P7_2_AGCTCTCGTGAGCGAT	17	neutrophilic.myeloblast
10X_P7_2_AGCTTGACACCTCGGA	19	band.form.neutrophil
10X_P7_2_AGCTTGACACCTCGTT	19	band.form.neutrophil
10X_P7_2_AGCTTGAGTGATGCCC	11	macrophage
10X_P7_2_AGCTTGATCGAGAGCA	19	band.form.neutrophil
10X_P7_2_AGGCCACAGTTAAGTG	14	monocyte
10X_P7_2_AGGCCGTCACATTTCT	6	precursor.B.cell
10X_P7_2_AGGGAGTGTAGTGAAT	14	monocyte
10X_P7_2_AGGGAGTGTCGCCATG	13	mature.B.cell
10X_P7_2_AGGGAGTGTTAAGATG	17	neutrophilic.myeloblast
10X_P7_2_AGGGAGTTCCCTAATT	13	mature.B.cell
10X_P7_2_AGGGATGGTCGTTGTA	9	myelocyte
10X_P7_2_AGGGATGTCATCACCC	6	precursor.B.cell
10X_P7_2_AGGGTGAAGAAGATTC	14	monocyte
10X_P7_2_AGGGTGAAGCTAAACA	11	macrophage
10X_P7_2_AGGGTGAAGTGCGTGA	17	neutrophilic.myeloblast
10X_P7_2_AGGGTGACAACGCACC	13	mature.B.cell
10X_P7_2_AGGGTGAGTGGCAAAC	13	mature.B.cell
10X_P7_2_AGGGTGATCATAGCAC	6	precursor.B.cell
10X_P7_2_AGGGTGATCCTTAATC	12	T.cell
10X_P7_2_AGGTCCGCAATGGATA	7	immature.B.cell
10X_P7_2_AGGTCCGGTCTGATCA	9	myelocyte
10X_P7_2_AGGTCCGTCATATCGG	2	reticulocyte
10X_P7_2_AGTAGTCCATCGGAAG	19	band.form.neutrophil
10X_P7_2_AGTAGTCTCTGCCCTA	19	band.form.neutrophil
10X_P7_2_AGTCTTTAGTAATCCC	19	band.form.neutrophil
10X_P7_2_AGTCTTTGTAAAGGAG	20	segmented.neutrophil.of.bone.marrow
10X_P7_2_AGTCTTTGTACACCGC	10	hematopoietic.stem.cell
10X_P7_2_AGTCTTTGTCCAGTGC	7	immature.B.cell
10X_P7_2_AGTCTTTTCAACACAC	3	erythroblast
10X_P7_2_AGTCTTTTCAGTGCAT	6	precursor.B.cell
10X_P7_2_AGTCTTTTCGTACCGG	12	T.cell
10X_P7_2_AGTCTTTTCGTGGACC	18	neutrophilic.metamyelocyte
10X_P7_2_AGTGAGGAGGCTCATT	14	monocyte
10X_P7_2_AGTGAGGGTCTGCAAT	16	promyelocyte
10X_P7_2_AGTGAGGTCTTGCCGT	20	segmented.neutrophil.of.bone.marrow
10X_P7_2_AGTGGGAAGAAACCGC	19	band.form.neutrophil
10X_P7_2_AGTGGGACAGCGATCC	16	promyelocyte
10X_P7_2_AGTGTCAAGACGCACA	18	neutrophilic.metamyelocyte
10X_P7_2_AGTGTCAAGTTGCAGG	5	early.pro.B.cell
10X_P7_2_AGTGTCAGTGAAATCA	9	myelocyte
10X_P7_2_AGTGTCATCGTAGATC	19	band.form.neutrophil
10X_P7_2_AGTTGGTAGCGATATA	6	precursor.B.cell
10X_P7_2_AGTTGGTAGGATTCGG	18	neutrophilic.metamyelocyte
10X_P7_2_AGTTGGTAGGGCTCTC	9	myelocyte
10X_P7_2_AGTTGGTAGTATTGGA	18	neutrophilic.metamyelocyte
10X_P7_2_AGTTGGTGTACAAGTA	6	precursor.B.cell
10X_P7_2_AGTTGGTGTACAGACG	11	macrophage
10X_P7_2_AGTTGGTTCCAGAAGG	16	promyelocyte
10X_P7_2_ATAACGCAGGGTTTCT	14	monocyte
10X_P7_2_ATAACGCAGTCCCACG	12	T.cell
10X_P7_2_ATAACGCGTCGAGTTT	6	precursor.B.cell
10X_P7_2_ATAACGCTCTAACTTC	17	neutrophilic.myeloblast
10X_P7_2_ATAAGAGCAAGACGTG	14	monocyte
10X_P7_2_ATAAGAGGTAACGTTC	20	segmented.neutrophil.of.bone.marrow
10X_P7_2_ATAAGAGTCTTGCATT	6	precursor.B.cell
10X_P7_2_ATAGACCCATATGCTG	17	neutrophilic.myeloblast
10X_P7_2_ATAGACCTCAGCCTAA	17	neutrophilic.myeloblast
10X_P7_2_ATCACGAAGTTAGGTA	14	monocyte
10X_P7_2_ATCACGACAGCCAATT	19	band.form.neutrophil
10X_P7_2_ATCACGACATAGACTC	14	monocyte
10X_P7_2_ATCACGAGTTGAGTTC	16	promyelocyte
10X_P7_2_ATCATCTCACTCGACG	20	segmented.neutrophil.of.bone.marrow
10X_P7_2_ATCATCTTCTGCTTGC	14	monocyte
10X_P7_2_ATCATGGCAAGCGTAG	16	promyelocyte
10X_P7_2_ATCCACCAGAATAGGG	13	mature.B.cell
10X_P7_2_ATCCACCAGCGATCCC	2	reticulocyte
10X_P7_2_ATCCGAACAGGCAGTA	14	monocyte
10X_P7_2_ATCCGAAGTTGCGTTA	20	segmented.neutrophil.of.bone.marrow
10X_P7_2_ATCGAGTAGAAACCTA	17	neutrophilic.myeloblast
10X_P7_2_ATCGAGTAGAACAACT	17	neutrophilic.myeloblast
10X_P7_2_ATCGAGTAGAAGGTGA	13	mature.B.cell
10X_P7_2_ATCGAGTAGACAATAC	11	macrophage
10X_P7_2_ATCGAGTAGTGGCACA	14	monocyte
10X_P7_2_ATCGAGTCACATCCAA	14	monocyte
10X_P7_2_ATCGAGTGTCCATCCT	14	monocyte
10X_P7_2_ATCGAGTGTTATGTGC	19	band.form.neutrophil
10X_P7_2_ATCGAGTTCACTGGGC	18	neutrophilic.metamyelocyte
10X_P7_2_ATCGAGTTCGGTGTCG	14	monocyte
10X_P7_2_ATCTACTGTCCAACTA	13	mature.B.cell
10X_P7_2_ATCTACTGTCTGCCAG	12	T.cell
10X_P7_2_ATCTACTGTCTTTCAT	10	hematopoietic.stem.cell
10X_P7_2_ATCTACTTCTTACCGC	19	band.form.neutrophil
10X_P7_2_ATCTGCCCACGTAAGG	15	conventional.dendritic.cell
10X_P7_2_ATCTGCCCAGGTGGAT	9	myelocyte
10X_P7_2_ATCTGCCGTCCAGTTA	16	promyelocyte
10X_P7_2_ATCTGCCTCGGATGTT	2	reticulocyte
10X_P7_2_ATGAGGGCATTTGCCC	19	band.form.neutrophil
10X_P7_2_ATGAGGGGTCTAGTGT	19	band.form.neutrophil
10X_P7_2_ATGCGATCAGACAGGT	9	myelocyte
10X_P7_2_ATGGGAGAGATGTGTA	6	precursor.B.cell
10X_P7_2_ATGGGAGCAGCGTAAG	18	neutrophilic.metamyelocyte
10X_P7_2_ATGGGAGCATTGTGCA	14	monocyte
10X_P7_2_ATGGGAGTCAGCGACC	19	band.form.neutrophil
10X_P7_2_ATGGGAGTCTTCAACT	19	band.form.neutrophil
10X_P7_2_ATGTGTGAGGCTAGAC	18	neutrophilic.metamyelocyte
10X_P7_2_ATGTGTGGTAAACCTC	6	precursor.B.cell
10X_P7_2_ATGTGTGGTCAGAAGC	11	macrophage
10X_P7_2_ATGTGTGGTGTAACGG	14	monocyte
10X_P7_2_ATGTGTGGTTCGTTGA	19	band.form.neutrophil
10X_P7_2_ATTACTCCACATCTTT	1	proerythroblast
10X_P7_2_ATTACTCCATACAGCT	19	band.form.neutrophil
10X_P7_2_ATTACTCTCAGCTCGG	11	macrophage
10X_P7_2_ATTACTCTCATTTGGG	19	band.form.neutrophil
10X_P7_2_ATTATCCAGTTTGCGT	19	band.form.neutrophil
10X_P7_2_ATTATCCCACGTAAGG	6	precursor.B.cell
10X_P7_2_ATTATCCGTTGATTCG	16	promyelocyte
10X_P7_2_ATTATCCTCTTGTTTG	1	proerythroblast
10X_P7_2_ATTCTACAGACTCGGA	17	neutrophilic.myeloblast
10X_P7_2_ATTCTACCAACACCTA	2	reticulocyte
10X_P7_2_ATTCTACGTACTCTCC	12	T.cell
10X_P7_2_ATTCTACGTAGTACCT	8	basophil
10X_P7_2_ATTCTACTCAATCACG	9	myelocyte
10X_P7_2_ATTGGTGCAATAGAGT	16	promyelocyte
10X_P7_2_ATTGGTGCATACAGCT	16	promyelocyte
10X_P7_2_ATTGGTGCATTTGCCC	16	promyelocyte
10X_P7_2_ATTGGTGGTCCGAGTC	18	neutrophilic.metamyelocyte
10X_P7_2_ATTTCTGAGAGGTACC	7	immature.B.cell
10X_P7_2_ATTTCTGCACGACGAA	20	segmented.neutrophil.of.bone.marrow
10X_P7_2_ATTTCTGGTGTTCTTT	2	reticulocyte
10X_P7_2_ATTTCTGGTTACGACT	16	promyelocyte
10X_P7_2_ATTTCTGTCATAGCAC	18	neutrophilic.metamyelocyte
10X_P7_2_ATTTCTGTCCCTAATT	20	segmented.neutrophil.of.bone.marrow
10X_P7_2_ATTTCTGTCTGTCCGT	9	myelocyte
10X_P7_2_CAACCAAAGAGTAATC	18	neutrophilic.metamyelocyte
10X_P7_2_CAACCAACATAACCTG	19	band.form.neutrophil
10X_P7_2_CAACCAAGTACCATCA	14	monocyte
10X_P7_2_CAACCAAGTCGGATCC	19	band.form.neutrophil
10X_P7_2_CAACCTCAGCGTAGTG	18	neutrophilic.metamyelocyte
10X_P7_2_CAACCTCCATACGCTA	9	myelocyte
10X_P7_2_CAACCTCGTGGGTATG	11	macrophage
10X_P7_2_CAACCTCTCTAACTTC	18	neutrophilic.metamyelocyte
10X_P7_2_CAACCTCTCTGGCGTG	19	band.form.neutrophil
10X_P7_2_CAACCTCTCTTCATGT	14	monocyte
10X_P7_2_CAACTAGCAAGCGATG	1	proerythroblast
10X_P7_2_CAACTAGTCATGTCTT	16	promyelocyte
10X_P7_2_CAACTAGTCCATTCTA	19	band.form.neutrophil
10X_P7_2_CAACTAGTCGATGAGG	11	macrophage
10X_P7_2_CAAGAAAAGCCACGTC	18	neutrophilic.metamyelocyte
10X_P7_2_CAAGAAAAGTTATCGC	12	T.cell
10X_P7_2_CAAGAAACACTGTTAG	15	conventional.dendritic.cell
10X_P7_2_CAAGATCCATAGGATA	2	reticulocyte
10X_P7_2_CAAGATCTCGGAAATA	7	immature.B.cell
10X_P7_2_CAAGGCCGTGTTTGTG	11	macrophage
10X_P7_2_CAAGGCCTCATAACCG	6	precursor.B.cell
10X_P7_2_CAAGGCCTCGAATGGG	14	monocyte
10X_P7_2_CAAGTTGAGGCACATG	14	monocyte
10X_P7_2_CAAGTTGCATGCCTAA	14	monocyte
10X_P7_2_CAAGTTGGTCTAGGTT	3	erythroblast
10X_P7_2_CAAGTTGTCCTTGCCA	19	band.form.neutrophil
10X_P7_2_CAAGTTGTCGTCCAGG	16	promyelocyte
10X_P7_2_CAAGTTGTCGTGGTCG	11	macrophage
10X_P7_2_CAAGTTGTCTCTAGGA	19	band.form.neutrophil
10X_P7_2_CACAAACAGCTAGTCT	11	macrophage
10X_P7_2_CACAAACCAAACCCAT	17	neutrophilic.myeloblast
10X_P7_2_CACAAACCAGCTTAAC	12	T.cell
10X_P7_2_CACACAAAGACAATAC	5	early.pro.B.cell
10X_P7_2_CACACAACAATGAAAC	19	band.form.neutrophil
10X_P7_2_CACACAACACCCTATC	16	promyelocyte
10X_P7_2_CACACAACAGCTGGCT	2	reticulocyte
10X_P7_2_CACACAATCCAGGGCT	16	promyelocyte
10X_P7_2_CACACAATCTCAACTT	18	neutrophilic.metamyelocyte
10X_P7_2_CACACCTAGCTTCGCG	19	band.form.neutrophil
10X_P7_2_CACACCTCATGCAATC	19	band.form.neutrophil
10X_P7_2_CACACCTTCCAACCAA	6	precursor.B.cell
10X_P7_2_CACACTCCACACATGT	16	promyelocyte
10X_P7_2_CACACTCCATTCTTAC	9	myelocyte
10X_P7_2_CACACTCCATTTGCCC	14	monocyte
10X_P7_2_CACACTCGTTGCCTCT	2	reticulocyte
10X_P7_2_CACACTCTCTCGAGTA	11	macrophage
10X_P7_2_CACAGGCAGTGTTGAA	1	proerythroblast
10X_P7_2_CACAGGCTCATTGCCC	1	proerythroblast
10X_P7_2_CACAGTAAGCGTTGCC	12	T.cell
10X_P7_2_CACAGTAAGGCGCTCT	6	precursor.B.cell
10X_P7_2_CACAGTAGTTGCGCAC	19	band.form.neutrophil
10X_P7_2_CACAGTAGTTGGTTTG	11	macrophage
10X_P7_2_CACATAGAGATGAGAG	6	precursor.B.cell
10X_P7_2_CACATAGAGCGTTGCC	9	myelocyte
10X_P7_2_CACATAGCACCCTATC	16	promyelocyte
10X_P7_2_CACATAGGTAGGACAC	2	reticulocyte
10X_P7_2_CACATAGGTGAAATCA	9	myelocyte
10X_P7_2_CACATAGTCGTTACAG	16	promyelocyte
10X_P7_2_CACATTTAGACAGACC	8	basophil
10X_P7_2_CACATTTAGATCACGG	18	neutrophilic.metamyelocyte
10X_P7_2_CACATTTGTAAGAGGA	7	immature.B.cell
10X_P7_2_CACATTTTCATAGCAC	12	T.cell
10X_P7_2_CACCACTAGCCAGGAT	15	conventional.dendritic.cell
10X_P7_2_CACCACTAGTCTTGCA	14	monocyte
10X_P7_2_CACCACTCACGTCAGC	1	proerythroblast
10X_P7_2_CACCACTGTAAGTTCC	6	precursor.B.cell
10X_P7_2_CACCACTGTTGTTTGG	9	myelocyte
10X_P7_2_CACCAGGAGAGTAATC	6	precursor.B.cell
10X_P7_2_CACCAGGCAAATTGCC	19	band.form.neutrophil
10X_P7_2_CACCTTGAGACATAAC	10	hematopoietic.stem.cell
10X_P7_2_CACCTTGTCGTAGGAG	16	promyelocyte
10X_P7_2_CACCTTGTCTCGCATC	6	precursor.B.cell
10X_P7_2_CACTCCACATGCTGGC	18	neutrophilic.metamyelocyte
10X_P7_2_CACTCCAGTCCTGCTT	14	monocyte
10X_P7_2_CACTCCATCGGATGTT	14	monocyte
10X_P7_2_CACTCCATCGTTTAGG	15	conventional.dendritic.cell
10X_P7_2_CAGAATCAGAAGCCCA	6	precursor.B.cell
10X_P7_2_CAGAATCGTAGAGTGC	14	monocyte
10X_P7_2_CAGAATCGTATCACCA	16	promyelocyte
10X_P7_2_CAGAATCTCGCTTGTC	12	T.cell
10X_P7_2_CAGAGAGCACAGACAG	13	mature.B.cell
10X_P7_2_CAGAGAGGTTCACGGC	3	erythroblast
10X_P7_2_CAGAGAGTCCTAGGGC	16	promyelocyte
10X_P7_2_CAGAGAGTCGAACGGA	19	band.form.neutrophil
10X_P7_2_CAGATCAAGACAAAGG	1	proerythroblast
10X_P7_2_CAGATCAAGATCGATA	14	monocyte
10X_P7_2_CAGATCACAACTGCGC	20	segmented.neutrophil.of.bone.marrow
10X_P7_2_CAGATCAGTCTCAACA	8	basophil
10X_P7_2_CAGATCATCATATCGG	19	band.form.neutrophil
10X_P7_2_CAGATCATCTGCGACG	9	myelocyte
10X_P7_2_CAGCAGCAGAGAACAG	14	monocyte
10X_P7_2_CAGCAGCAGAGCAATT	19	band.form.neutrophil
10X_P7_2_CAGCAGCAGGCAGGTT	9	myelocyte
10X_P7_2_CAGCAGCCAAGCGAGT	16	promyelocyte
10X_P7_2_CAGCAGCCAGCCAATT	20	segmented.neutrophil.of.bone.marrow
10X_P7_2_CAGCAGCGTGAGGGTT	11	macrophage
10X_P7_2_CAGCATATCTACGAGT	7	immature.B.cell
10X_P7_2_CAGCCGAAGGGTCGAT	16	promyelocyte
10X_P7_2_CAGCCGACATGCAATC	17	neutrophilic.myeloblast
10X_P7_2_CAGCCGAGTTCAGCGC	19	band.form.neutrophil
10X_P7_2_CAGCCGATCGGAGCAA	9	myelocyte
10X_P7_2_CAGCGACAGGTGATTA	6	precursor.B.cell
10X_P7_2_CAGCGACCAAGAGGCT	19	band.form.neutrophil
10X_P7_2_CAGCGACTCAGCTGGC	7	immature.B.cell
10X_P7_2_CAGCTAAAGACTTGAA	18	neutrophilic.metamyelocyte
10X_P7_2_CAGCTAAGTCCAAGTT	14	monocyte
10X_P7_2_CAGCTAAGTGAGCGAT	9	myelocyte
10X_P7_2_CAGCTAAGTGGTACAG	9	myelocyte
10X_P7_2_CAGCTGGAGCGATATA	14	monocyte
10X_P7_2_CAGCTGGCAACTGCTA	17	neutrophilic.myeloblast
10X_P7_2_CAGGTGCAGTTAACGA	16	promyelocyte
10X_P7_2_CAGGTGCGTTCACGGC	19	band.form.neutrophil
10X_P7_2_CAGGTGCGTTTGTTGG	18	neutrophilic.metamyelocyte
10X_P7_2_CAGGTGCTCAGCGACC	11	macrophage
10X_P7_2_CAGTAACAGCCGATTT	10	hematopoietic.stem.cell
10X_P7_2_CAGTAACAGGATTCGG	9	myelocyte
10X_P7_2_CAGTAACCAATCTGCA	19	band.form.neutrophil
10X_P7_2_CAGTCCTCAAGCCGCT	20	segmented.neutrophil.of.bone.marrow
10X_P7_2_CAGTCCTGTAGGCTGA	19	band.form.neutrophil
10X_P7_2_CAGTCCTTCCCTCTTT	14	monocyte
10X_P7_2_CATATGGAGCCAACAG	18	neutrophilic.metamyelocyte
10X_P7_2_CATATGGCAACACCCG	19	band.form.neutrophil
10X_P7_2_CATATGGCAGTCGTGC	14	monocyte
10X_P7_2_CATATGGTCAGAGACG	9	myelocyte
10X_P7_2_CATATGGTCATGTCTT	19	band.form.neutrophil
10X_P7_2_CATATGGTCCGTCAAA	18	neutrophilic.metamyelocyte
10X_P7_2_CATATTCAGCACACAG	6	precursor.B.cell
10X_P7_2_CATATTCCAATCTGCA	14	monocyte
10X_P7_2_CATATTCTCCAGAGGA	16	promyelocyte
10X_P7_2_CATCAAGCACAGACAG	19	band.form.neutrophil
10X_P7_2_CATCAAGGTAACGCGA	6	precursor.B.cell
10X_P7_2_CATCAAGTCCACGTGG	5	early.pro.B.cell
10X_P7_2_CATCAAGTCGCGGATC	7	immature.B.cell
10X_P7_2_CATCAGAAGGCATGGT	11	macrophage
10X_P7_2_CATCAGACAAAGTCAA	12	T.cell
10X_P7_2_CATCAGACACACGCTG	5	early.pro.B.cell
10X_P7_2_CATCAGAGTACCGCTG	7	immature.B.cell
10X_P7_2_CATCAGAGTTACGGAG	19	band.form.neutrophil
10X_P7_2_CATCCACAGGCCATAG	18	neutrophilic.metamyelocyte
10X_P7_2_CATCCACCACTTCTGC	3	erythroblast
10X_P7_2_CATCCACGTTCGAATC	16	promyelocyte
10X_P7_2_CATCCACGTTGATTGC	16	promyelocyte
10X_P7_2_CATCGAAAGGCAATTA	13	mature.B.cell
10X_P7_2_CATCGAAGTGTCGCTG	19	band.form.neutrophil
10X_P7_2_CATGACACAAGCCGCT	10	hematopoietic.stem.cell
10X_P7_2_CATGACAGTATCTGCA	6	precursor.B.cell
10X_P7_2_CATGACAGTTCGAATC	19	band.form.neutrophil
10X_P7_2_CATGCCTAGCTAGGCA	14	monocyte
10X_P7_2_CATGCCTAGGACAGAA	15	conventional.dendritic.cell
10X_P7_2_CATGCCTCATCGATGT	7	immature.B.cell
10X_P7_2_CATGCCTGTTGACGTT	20	segmented.neutrophil.of.bone.marrow
10X_P7_2_CATGGCGAGAAACCAT	20	segmented.neutrophil.of.bone.marrow
10X_P7_2_CATGGCGAGGAGTTTA	14	monocyte
10X_P7_2_CATGGCGAGTTTGCGT	12	T.cell
10X_P7_2_CATGGCGCAGGTGGAT	20	segmented.neutrophil.of.bone.marrow
10X_P7_2_CATGGCGGTCGGGTCT	9	myelocyte
10X_P7_2_CATGGCGTCACTCTTA	14	monocyte
10X_P7_2_CATTATCGTCAACTGT	19	band.form.neutrophil
10X_P7_2_CATTATCGTTAGGGTG	10	hematopoietic.stem.cell
10X_P7_2_CATTATCTCCCAACGG	14	monocyte
10X_P7_2_CATTATCTCCGAAGAG	1	proerythroblast
10X_P7_2_CATTCGCAGACCCACC	18	neutrophilic.metamyelocyte
10X_P7_2_CATTCGCAGATCACGG	17	neutrophilic.myeloblast
10X_P7_2_CATTCGCCACACATGT	13	mature.B.cell
10X_P7_2_CATTCGCCAGATCTGT	13	mature.B.cell
10X_P7_2_CATTCGCGTAGCTGCC	19	band.form.neutrophil
10X_P7_2_CATTCGCGTGCCTGGT	7	immature.B.cell
10X_P7_2_CATTCGCTCCTCAATT	14	monocyte
10X_P7_2_CATTCGCTCGGTTAAC	10	hematopoietic.stem.cell
10X_P7_2_CCAATCCAGCTCAACT	16	promyelocyte
10X_P7_2_CCAATCCCAATAGCAA	19	band.form.neutrophil
10X_P7_2_CCAATCCGTCTGCGGT	7	immature.B.cell
10X_P7_2_CCAATCCTCAACGCTA	11	macrophage
10X_P7_2_CCAATCCTCTTTACAC	17	neutrophilic.myeloblast
10X_P7_2_CCACCTAAGACTGGGT	14	monocyte
10X_P7_2_CCACGGACAGTATAAG	14	monocyte
10X_P7_2_CCACGGACATGCCCGA	10	hematopoietic.stem.cell
10X_P7_2_CCACTACAGTCAATAG	5	early.pro.B.cell
10X_P7_2_CCACTACCAAGAAGAG	17	neutrophilic.myeloblast
10X_P7_2_CCACTACCACGACGAA	14	monocyte
10X_P7_2_CCACTACCACGGTTTA	11	macrophage
10X_P7_2_CCACTACCATCGACGC	19	band.form.neutrophil
10X_P7_2_CCACTACGTCTGGAGA	5	early.pro.B.cell
10X_P7_2_CCACTACTCCAAACAC	15	conventional.dendritic.cell
10X_P7_2_CCACTACTCGTTACAG	6	precursor.B.cell
10X_P7_2_CCAGCGAAGGGATCTG	1	proerythroblast
10X_P7_2_CCAGCGACATATGGTC	16	promyelocyte
10X_P7_2_CCAGCGAGTCCAGTTA	9	myelocyte
10X_P7_2_CCATGTCCAAACAACA	12	T.cell
10X_P7_2_CCATGTCCAGCCTTTC	15	conventional.dendritic.cell
10X_P7_2_CCATGTCGTTCCGTCT	1	proerythroblast
10X_P7_2_CCATGTCTCGGCCGAT	15	conventional.dendritic.cell
10X_P7_2_CCATTCGAGATCCCAT	7	immature.B.cell
10X_P7_2_CCATTCGAGATCTGAA	7	immature.B.cell
10X_P7_2_CCATTCGAGTTAGGTA	2	reticulocyte
10X_P7_2_CCCAATCCACTCGACG	19	band.form.neutrophil
10X_P7_2_CCCAATCGTGTAATGA	19	band.form.neutrophil
10X_P7_2_CCCAATCTCGCTAGCG	18	neutrophilic.metamyelocyte
10X_P7_2_CCCAGTTGTCTAGCCG	6	precursor.B.cell
10X_P7_2_CCCAGTTGTCTAGTCA	7	immature.B.cell
10X_P7_2_CCCAGTTGTCTCCCTA	19	band.form.neutrophil
10X_P7_2_CCCAGTTGTGTGAATA	10	hematopoietic.stem.cell
10X_P7_2_CCCAGTTTCCGTCAAA	7	immature.B.cell
10X_P7_2_CCCATACAGTAGATGT	14	monocyte
10X_P7_2_CCCATACAGTTTCCTT	19	band.form.neutrophil
10X_P7_2_CCCATACGTAGTACCT	12	T.cell
10X_P7_2_CCCTCCTGTGATAAGT	19	band.form.neutrophil
10X_P7_2_CCCTCCTTCGTAGGTT	19	band.form.neutrophil
10X_P7_2_CCGGGATAGAATTGTG	14	monocyte
10X_P7_2_CCGGGATAGGGAAACA	16	promyelocyte
10X_P7_2_CCGGGATCAAGCTGAG	14	monocyte
10X_P7_2_CCGGGATGTATGAATG	14	monocyte
10X_P7_2_CCGGGATTCTGCCAGG	1	proerythroblast
10X_P7_2_CCGGTAGAGTGAAGTT	2	reticulocyte
10X_P7_2_CCGGTAGCAGTCGTGC	16	promyelocyte
10X_P7_2_CCGGTAGCATGGATGG	9	myelocyte
10X_P7_2_CCGGTAGGTACCATCA	20	segmented.neutrophil.of.bone.marrow
10X_P7_2_CCGGTAGTCCAGAAGG	9	myelocyte
10X_P7_2_CCGGTAGTCTTCGGTC	14	monocyte
10X_P7_2_CCGTACTCATAGACTC	11	macrophage
10X_P7_2_CCGTACTGTAGGCATG	9	myelocyte
10X_P7_2_CCGTACTTCCAAATGC	8	basophil
10X_P7_2_CCGTGGACAACACCTA	18	neutrophilic.metamyelocyte
10X_P7_2_CCGTGGAGTTCGGGCT	18	neutrophilic.metamyelocyte
10X_P7_2_CCGTTCAGTATTCTCT	18	neutrophilic.metamyelocyte
10X_P7_2_CCGTTCATCGGCGCAT	8	basophil
10X_P7_2_CCTAAAGGTGACCAAG	12	T.cell
10X_P7_2_CCTAAAGGTTCCTCCA	18	neutrophilic.metamyelocyte
10X_P7_2_CCTAAAGTCTTACCGC	19	band.form.neutrophil
10X_P7_2_CCTACACAGCTGAACG	11	macrophage
10X_P7_2_CCTACACAGTATGACA	18	neutrophilic.metamyelocyte
10X_P7_2_CCTACACTCCACGTGG	18	neutrophilic.metamyelocyte
10X_P7_2_CCTACACTCGCTTGTC	18	neutrophilic.metamyelocyte
10X_P7_2_CCTAGCTCACCTGGTG	14	monocyte
10X_P7_2_CCTAGCTCAGGGCATA	11	macrophage
10X_P7_2_CCTAGCTCAGTTTACG	18	neutrophilic.metamyelocyte
10X_P7_2_CCTAGCTGTAGGCTGA	12	T.cell
10X_P7_2_CCTATTATCAACACGT	13	mature.B.cell
10X_P7_2_CCTATTATCCGCGTTT	14	monocyte
10X_P7_2_CCTATTATCTTAGAGC	9	myelocyte
10X_P7_2_CCTCAGTCAAGACGTG	19	band.form.neutrophil
10X_P7_2_CCTCAGTTCACCGTAA	11	macrophage
10X_P7_2_CCTCAGTTCCTTCAAT	19	band.form.neutrophil
10X_P7_2_CCTCAGTTCGTACCGG	11	macrophage
10X_P7_2_CCTCTGAAGACACGAC	6	precursor.B.cell
10X_P7_2_CCTCTGACATCTACGA	19	band.form.neutrophil
10X_P7_2_CCTCTGAGTAGTGAAT	19	band.form.neutrophil
10X_P7_2_CCTCTGAGTCCGCTGA	14	monocyte
10X_P7_2_CCTTACGCACATGTGT	19	band.form.neutrophil
10X_P7_2_CCTTACGCATCGGTTA	15	conventional.dendritic.cell
10X_P7_2_CCTTACGGTCTAACGT	10	hematopoietic.stem.cell
10X_P7_2_CCTTACGTCTCAAGTG	3	erythroblast
10X_P7_2_CCTTCCCCAGCGTCCA	10	hematopoietic.stem.cell
10X_P7_2_CCTTCGAAGACTTTCG	11	macrophage
10X_P7_2_CCTTCGAGTAGCGCAA	19	band.form.neutrophil
10X_P7_2_CCTTCGAGTCAAGCGA	19	band.form.neutrophil
10X_P7_2_CCTTTCTAGCAGACTG	7	immature.B.cell
10X_P7_2_CCTTTCTAGCAGGCTA	10	hematopoietic.stem.cell
10X_P7_2_CCTTTCTAGTGAACAT	11	macrophage
10X_P7_2_CCTTTCTGTACCGAGA	16	promyelocyte
10X_P7_2_CCTTTCTGTTAAGAAC	6	precursor.B.cell
10X_P7_2_CGAACATCAATGCCAT	7	immature.B.cell
10X_P7_2_CGAACATCAGGATTGG	11	macrophage
10X_P7_2_CGAACATGTATTCGTG	7	immature.B.cell
10X_P7_2_CGAACATTCATCGGAT	15	conventional.dendritic.cell
10X_P7_2_CGAATGTAGCTGCGAA	19	band.form.neutrophil
10X_P7_2_CGAATGTAGGATGGTC	19	band.form.neutrophil
10X_P7_2_CGAATGTCAGCGTTCG	14	monocyte
10X_P7_2_CGACCTTAGGTGACCA	18	neutrophilic.metamyelocyte
10X_P7_2_CGACCTTTCACCATAG	7	immature.B.cell
10X_P7_2_CGACTTCAGTAGGTGC	14	monocyte
10X_P7_2_CGACTTCCATGCGCAC	20	segmented.neutrophil.of.bone.marrow
10X_P7_2_CGAGAAGAGCCGCCTA	9	myelocyte
10X_P7_2_CGAGAAGAGTCGAGTG	19	band.form.neutrophil
10X_P7_2_CGAGAAGCAAACGTGG	14	monocyte
10X_P7_2_CGAGAAGCACCATCCT	6	precursor.B.cell
10X_P7_2_CGAGAAGCACCATGTA	12	T.cell
10X_P7_2_CGAGAAGCATCCGGGT	14	monocyte
10X_P7_2_CGAGAAGCATGCAATC	5	early.pro.B.cell
10X_P7_2_CGAGAAGGTCGCGTGT	6	precursor.B.cell
10X_P7_2_CGAGCACAGCCTCGTG	16	promyelocyte
10X_P7_2_CGAGCACCAAGTCTAC	6	precursor.B.cell
10X_P7_2_CGAGCACGTAGTGAAT	7	immature.B.cell
10X_P7_2_CGAGCCACACACGCTG	20	segmented.neutrophil.of.bone.marrow
10X_P7_2_CGAGCCACATGCAACT	1	proerythroblast
10X_P7_2_CGAGCCATCCATGAGT	14	monocyte
10X_P7_2_CGATCGGAGTGAACAT	17	neutrophilic.myeloblast
10X_P7_2_CGATCGGAGTGAACGC	20	segmented.neutrophil.of.bone.marrow
10X_P7_2_CGATCGGCAATGAATG	14	monocyte
10X_P7_2_CGATCGGCAGATAATG	13	mature.B.cell
10X_P7_2_CGATCGGCAGGGTATG	16	promyelocyte
10X_P7_2_CGATCGGTCACAGGCC	16	promyelocyte
10X_P7_2_CGATCGGTCCGAAGAG	11	macrophage
10X_P7_2_CGATCGGTCCTTGGTC	14	monocyte
10X_P7_2_CGATGGCTCTAACTTC	1	proerythroblast
10X_P7_2_CGATGTAAGGATGTAT	20	segmented.neutrophil.of.bone.marrow
10X_P7_2_CGATGTACAACACGCC	12	T.cell
10X_P7_2_CGATTGAAGAAGGGTA	16	promyelocyte
10X_P7_2_CGATTGAGTCGACTGC	14	monocyte
10X_P7_2_CGATTGAGTTACGTCA	14	monocyte
10X_P7_2_CGATTGATCGCCCTTA	12	T.cell
10X_P7_2_CGATTGATCTACTTAC	3	erythroblast
10X_P7_2_CGCCAAGAGCTACCGC	3	erythroblast
10X_P7_2_CGCCAAGAGCTTATCG	7	immature.B.cell
10X_P7_2_CGCCAAGAGGCATGGT	6	precursor.B.cell
10X_P7_2_CGCCAAGGTGACGGTA	12	T.cell
10X_P7_2_CGCCAAGTCTGCGACG	18	neutrophilic.metamyelocyte
10X_P7_2_CGCGGTAAGCAGATCG	19	band.form.neutrophil
10X_P7_2_CGCGGTAGTACAGTTC	18	neutrophilic.metamyelocyte
10X_P7_2_CGCGGTAGTGTCGCTG	7	immature.B.cell
10X_P7_2_CGCGGTATCGCAAGCC	16	promyelocyte
10X_P7_2_CGCGTTTAGTGTCCCG	13	mature.B.cell
10X_P7_2_CGCGTTTCATCGGTTA	12	T.cell
10X_P7_2_CGCGTTTCATGTCTCC	12	T.cell
10X_P7_2_CGCGTTTGTCTGGAGA	14	monocyte
10X_P7_2_CGCTATCCAGCTATTG	9	myelocyte
10X_P7_2_CGCTATCGTAAACACA	15	conventional.dendritic.cell
10X_P7_2_CGCTATCGTGATGTCT	2	reticulocyte
10X_P7_2_CGCTATCTCTTCCTTC	19	band.form.neutrophil
10X_P7_2_CGCTGGACATTACCTT	9	myelocyte
10X_P7_2_CGCTGGAGTGAGCGAT	15	conventional.dendritic.cell
10X_P7_2_CGCTGGATCCAGTAGT	6	precursor.B.cell
10X_P7_2_CGCTTCAAGCCAGTAG	12	T.cell
10X_P7_2_CGCTTCACAGATCCAT	1	proerythroblast
10X_P7_2_CGGACACGTCTCTTAT	2	reticulocyte
10X_P7_2_CGGACACTCCGATATG	2	reticulocyte
10X_P7_2_CGGACGTAGGACCACA	7	immature.B.cell
10X_P7_2_CGGACGTAGTGTCCCG	11	macrophage
10X_P7_2_CGGACGTCAATGAAAC	1	proerythroblast
10X_P7_2_CGGACGTCAATGTAAG	19	band.form.neutrophil
10X_P7_2_CGGACGTGTCGACTAT	19	band.form.neutrophil
10X_P7_2_CGGAGCTAGTTGTCGT	14	monocyte
10X_P7_2_CGGAGTCTCCGAGCCA	13	mature.B.cell
10X_P7_2_CGGAGTCTCGGTGTCG	11	macrophage
10X_P7_2_CGGAGTCTCTACTATC	17	neutrophilic.myeloblast
10X_P7_2_CGGCTAGTCCAAAGTC	2	reticulocyte
10X_P7_2_CGGCTAGTCGTGGACC	19	band.form.neutrophil
10X_P7_2_CGGGTCAAGTGATCGG	13	mature.B.cell
10X_P7_2_CGGGTCACAGCTGCTG	11	macrophage
10X_P7_2_CGGGTCAGTGACAAAT	11	macrophage
10X_P7_2_CGGTTAAAGCCACGTC	7	immature.B.cell
10X_P7_2_CGGTTAACAAACCCAT	19	band.form.neutrophil
10X_P7_2_CGGTTAACACGCGAAA	2	reticulocyte
10X_P7_2_CGGTTAACATCACGTA	19	band.form.neutrophil
10X_P7_2_CGGTTAAGTGCGAAAC	18	neutrophilic.metamyelocyte
10X_P7_2_CGGTTAATCAATACCG	1	proerythroblast
10X_P7_2_CGTAGCGCAACGATGG	12	T.cell
10X_P7_2_CGTAGCGCAGCCAGAA	2	reticulocyte
10X_P7_2_CGTAGCGCAGTAGAGC	18	neutrophilic.metamyelocyte
10X_P7_2_CGTAGCGGTAGCTGCC	19	band.form.neutrophil
10X_P7_2_CGTAGCGGTATGCTTG	14	monocyte
10X_P7_2_CGTAGCGGTTGTCGCG	14	monocyte
10X_P7_2_CGTAGCGTCCGAATGT	19	band.form.neutrophil
10X_P7_2_CGTAGCGTCGTCTGAA	18	neutrophilic.metamyelocyte
10X_P7_2_CGTAGGCCACATCTTT	18	neutrophilic.metamyelocyte
10X_P7_2_CGTAGGCGTACTCGCG	1	proerythroblast
10X_P7_2_CGTAGGCTCCATGAGT	19	band.form.neutrophil
10X_P7_2_CGTCACTAGCGATAGC	1	proerythroblast
10X_P7_2_CGTCACTAGCTACCTA	14	monocyte
10X_P7_2_CGTCACTGTTCGGGCT	14	monocyte
10X_P7_2_CGTCAGGAGTTGTCGT	19	band.form.neutrophil
10X_P7_2_CGTCAGGTCACAATGC	12	T.cell
10X_P7_2_CGTCAGGTCCTCGCAT	1	proerythroblast
10X_P7_2_CGTCAGGTCTTCCTTC	12	T.cell
10X_P7_2_CGTCCATAGAAACCAT	19	band.form.neutrophil
10X_P7_2_CGTCCATCACTACAGT	10	hematopoietic.stem.cell
10X_P7_2_CGTCCATCAGCGTTCG	2	reticulocyte
10X_P7_2_CGTCTACTCTCTGTCG	1	proerythroblast
10X_P7_2_CGTGAGCAGCAGGTCA	11	macrophage
10X_P7_2_CGTGTAAAGATGAGAG	16	promyelocyte
10X_P7_2_CGTGTAAGTCAGAGGT	6	precursor.B.cell
10X_P7_2_CGTGTCTCAACACCCG	6	precursor.B.cell
10X_P7_2_CGTGTCTCATGCTAGT	15	conventional.dendritic.cell
10X_P7_2_CGTGTCTGTAACGCGA	19	band.form.neutrophil
10X_P7_2_CGTGTCTGTGCACTTA	10	hematopoietic.stem.cell
10X_P7_2_CGTGTCTTCACGGTTA	19	band.form.neutrophil
10X_P7_2_CGTGTCTTCATGTCTT	14	monocyte
10X_P7_2_CGTGTCTTCCAGAGGA	14	monocyte
10X_P7_2_CGTTAGACACTATCTT	2	reticulocyte
10X_P7_2_CGTTAGAGTGGTCCGT	11	macrophage
10X_P7_2_CGTTAGAGTTGACGTT	15	conventional.dendritic.cell
10X_P7_2_CGTTCTGGTCCGAATT	3	erythroblast
10X_P7_2_CGTTCTGGTCTCATCC	19	band.form.neutrophil
10X_P7_2_CGTTCTGGTGATGATA	9	myelocyte
10X_P7_2_CGTTCTGGTGTGCCTG	8	basophil
10X_P7_2_CGTTCTGTCCGCATCT	18	neutrophilic.metamyelocyte
10X_P7_2_CGTTCTGTCGCATGGC	1	proerythroblast
10X_P7_2_CGTTCTGTCTTGTACT	9	myelocyte
10X_P7_2_CGTTGGGAGAAGAAGC	6	precursor.B.cell
10X_P7_2_CGTTGGGGTACGCACC	12	T.cell
10X_P7_2_CGTTGGGGTGCCTGTG	2	reticulocyte
10X_P7_2_CGTTGGGGTTCGTTGA	19	band.form.neutrophil
10X_P7_2_CGTTGGGGTTGTACAC	14	monocyte
10X_P7_2_CTAACTTAGAGTAAGG	16	promyelocyte
10X_P7_2_CTAACTTAGTGCAAGC	19	band.form.neutrophil
10X_P7_2_CTAACTTGTAATCACC	5	early.pro.B.cell
10X_P7_2_CTAACTTGTACACCGC	6	precursor.B.cell
10X_P7_2_CTAACTTGTCTGCAAT	1	proerythroblast
10X_P7_2_CTAAGACAGCGTTCCG	19	band.form.neutrophil
10X_P7_2_CTAAGACAGTCCGTAT	19	band.form.neutrophil
10X_P7_2_CTAAGACAGTTAGGTA	10	hematopoietic.stem.cell
10X_P7_2_CTAAGACTCGCCGTGA	6	precursor.B.cell
10X_P7_2_CTAAGACTCGGATGTT	6	precursor.B.cell
10X_P7_2_CTACACCAGTCTCGGC	11	macrophage
10X_P7_2_CTACACCCAGGGATTG	4	plasma.cell
10X_P7_2_CTACACCCAGTGGAGT	12	T.cell
10X_P7_2_CTACACCGTCTGATTG	14	monocyte
10X_P7_2_CTACACCTCGCGGATC	12	T.cell
10X_P7_2_CTACACCTCTGCCAGG	19	band.form.neutrophil
10X_P7_2_CTACACCTCTGTGCAA	19	band.form.neutrophil
10X_P7_2_CTACATTCAGTGACAG	7	immature.B.cell
10X_P7_2_CTACATTTCTTCGGTC	10	hematopoietic.stem.cell
10X_P7_2_CTACCCAAGCTAAGAT	5	early.pro.B.cell
10X_P7_2_CTACCCAAGGCCGAAT	14	monocyte
10X_P7_2_CTACCCAGTATGCTTG	10	hematopoietic.stem.cell
10X_P7_2_CTACCCAGTCAGAATA	19	band.form.neutrophil
10X_P7_2_CTACGTCAGAGCTGCA	19	band.form.neutrophil
10X_P7_2_CTACGTCCAGGTGGAT	15	conventional.dendritic.cell
10X_P7_2_CTAGAGTCAAAGTGCG	17	neutrophilic.myeloblast
10X_P7_2_CTAGAGTCATTGGGCC	14	monocyte
10X_P7_2_CTAGAGTGTAGTGAAT	15	conventional.dendritic.cell
10X_P7_2_CTAGAGTGTGCTTCTC	20	segmented.neutrophil.of.bone.marrow
10X_P7_2_CTAGCCTCATAGACTC	19	band.form.neutrophil
10X_P7_2_CTAGCCTTCTATGTGG	14	monocyte
10X_P7_2_CTAGTGAGTCGTTGTA	18	neutrophilic.metamyelocyte
10X_P7_2_CTAGTGATCATGTCTT	15	conventional.dendritic.cell
10X_P7_2_CTCACACAGTACGTTC	19	band.form.neutrophil
10X_P7_2_CTCAGAAAGCTGTCTA	19	band.form.neutrophil
10X_P7_2_CTCAGAACAGATCCAT	14	monocyte
10X_P7_2_CTCATTAGTATAATGG	19	band.form.neutrophil
10X_P7_2_CTCATTAGTATAGGTA	14	monocyte
10X_P7_2_CTCCTAGAGCACACAG	3	erythroblast
10X_P7_2_CTCCTAGTCACTTATC	12	T.cell
10X_P7_2_CTCGAAAAGCCGATTT	6	precursor.B.cell
10X_P7_2_CTCGAAAAGGCAATTA	19	band.form.neutrophil
10X_P7_2_CTCGAAAGTCGTCTTC	16	promyelocyte
10X_P7_2_CTCGAAAGTTTGCATG	18	neutrophilic.metamyelocyte
10X_P7_2_CTCGAAATCCTACAGA	14	monocyte
10X_P7_2_CTCGAAATCTTGACGA	14	monocyte
10X_P7_2_CTCGAGGAGGTGCTTT	9	myelocyte
10X_P7_2_CTCGAGGAGTACACCT	16	promyelocyte
10X_P7_2_CTCGAGGCACCAGGCT	19	band.form.neutrophil
10X_P7_2_CTCGAGGGTAAAGTCA	16	promyelocyte
10X_P7_2_CTCGGAGAGAATGTTG	14	monocyte
10X_P7_2_CTCGGAGAGCCTATGT	8	basophil
10X_P7_2_CTCGGAGGTAGCCTCG	18	neutrophilic.metamyelocyte
10X_P7_2_CTCGGAGGTCCCTTGT	14	monocyte
10X_P7_2_CTCGGGAAGGTGCTAG	6	precursor.B.cell
10X_P7_2_CTCGTACAGTTGAGAT	6	precursor.B.cell
10X_P7_2_CTCGTACTCGGCTTGG	16	promyelocyte
10X_P7_2_CTCGTCAAGAGTACAT	9	myelocyte
10X_P7_2_CTCGTCAAGAGTGACC	14	monocyte
10X_P7_2_CTCGTCATCAGTCCCT	16	promyelocyte
10X_P7_2_CTCGTCATCAGTGTTG	7	immature.B.cell
10X_P7_2_CTCTAATAGTGTTAGA	7	immature.B.cell
10X_P7_2_CTCTAATCACGAAACG	10	hematopoietic.stem.cell
10X_P7_2_CTCTAATCACGTCTCT	10	hematopoietic.stem.cell
10X_P7_2_CTCTAATCAGCCAGAA	6	precursor.B.cell
10X_P7_2_CTCTAATGTCTAAACC	16	promyelocyte
10X_P7_2_CTCTACGAGTGTACGG	6	precursor.B.cell
10X_P7_2_CTCTACGGTGCCTGGT	11	macrophage
10X_P7_2_CTCTGGTAGAGGGATA	14	monocyte
10X_P7_2_CTCTGGTAGATGTGTA	8	basophil
10X_P7_2_CTCTGGTTCACCAGGC	19	band.form.neutrophil
10X_P7_2_CTGAAACTCCTGTAGA	11	macrophage
10X_P7_2_CTGAAACTCGGAATCT	19	band.form.neutrophil
10X_P7_2_CTGAAACTCTGGCGTG	12	T.cell
10X_P7_2_CTGAAGTAGCCACCTG	19	band.form.neutrophil
10X_P7_2_CTGAAGTAGGGTCTCC	18	neutrophilic.metamyelocyte
10X_P7_2_CTGAAGTGTAACGTTC	16	promyelocyte
10X_P7_2_CTGAAGTGTGCCTGTG	19	band.form.neutrophil
10X_P7_2_CTGATAGAGATGCCAG	3	erythroblast
10X_P7_2_CTGATAGCATTGAGCT	9	myelocyte
10X_P7_2_CTGATAGTCCGGGTGT	14	monocyte
10X_P7_2_CTGATAGTCGTTACAG	13	mature.B.cell
10X_P7_2_CTGATAGTCTCTGAGA	19	band.form.neutrophil
10X_P7_2_CTGCCTAGTTTACTCT	6	precursor.B.cell
10X_P7_2_CTGCCTATCGCTTGTC	9	myelocyte
10X_P7_2_CTGCGGAAGCATCATC	19	band.form.neutrophil
10X_P7_2_CTGCGGAAGCGTAATA	20	segmented.neutrophil.of.bone.marrow
10X_P7_2_CTGCGGAAGTGGACGT	7	immature.B.cell
10X_P7_2_CTGCGGACAGTGACAG	13	mature.B.cell
10X_P7_2_CTGCGGACATTCACTT	16	promyelocyte
10X_P7_2_CTGCGGAGTACGCACC	19	band.form.neutrophil
10X_P7_2_CTGCGGAGTCTAGTCA	19	band.form.neutrophil
10X_P7_2_CTGCGGAGTGTTGAGG	9	myelocyte
10X_P7_2_CTGCGGAGTTAGAACA	11	macrophage
10X_P7_2_CTGCTGTGTTATCACG	18	neutrophilic.metamyelocyte
10X_P7_2_CTGCTGTTCAAGATCC	20	segmented.neutrophil.of.bone.marrow
10X_P7_2_CTGGTCTAGGGCTTGA	15	conventional.dendritic.cell
10X_P7_2_CTGGTCTGTTTACTCT	19	band.form.neutrophil
10X_P7_2_CTGGTCTTCTGCCAGG	12	T.cell
10X_P7_2_CTGTGCTAGGGTCGAT	15	conventional.dendritic.cell
10X_P7_2_CTGTGCTCATCCGCGA	11	macrophage
10X_P7_2_CTGTGCTTCGTTTAGG	14	monocyte
10X_P7_2_CTGTTTAAGGTGCTTT	18	neutrophilic.metamyelocyte
10X_P7_2_CTGTTTACAGCGTCCA	18	neutrophilic.metamyelocyte
10X_P7_2_CTGTTTAGTCCGCTGA	20	segmented.neutrophil.of.bone.marrow
10X_P7_2_CTGTTTATCAGCGATT	9	myelocyte
10X_P7_2_CTGTTTATCCCAAGAT	19	band.form.neutrophil
10X_P7_2_CTGTTTATCTAACTCT	18	neutrophilic.metamyelocyte
10X_P7_2_CTTAACTCAATGTTGC	16	promyelocyte
10X_P7_2_CTTAACTGTGTATGGG	17	neutrophilic.myeloblast
10X_P7_2_CTTACCGCACATTAGC	19	band.form.neutrophil
10X_P7_2_CTTACCGTCTCGTTTA	6	precursor.B.cell
10X_P7_2_CTTAGGATCACCAGGC	12	T.cell
10X_P7_2_CTTAGGATCGGCGCAT	12	T.cell
10X_P7_2_CTTCTCTAGGACACCA	1	proerythroblast
10X_P7_2_CTTCTCTCATGCTAGT	7	immature.B.cell
10X_P7_2_CTTCTCTGTGGCCCTA	9	myelocyte
10X_P7_2_CTTCTCTGTTCCGTCT	6	precursor.B.cell
10X_P7_2_CTTCTCTGTTGATTGC	16	promyelocyte
10X_P7_2_CTTGGCTAGATGTCGG	18	neutrophilic.metamyelocyte
10X_P7_2_CTTGGCTGTTCCGTCT	6	precursor.B.cell
10X_P7_2_CTTGGCTTCATCGGAT	9	myelocyte
10X_P7_2_CTTTGCGAGACTAGAT	10	hematopoietic.stem.cell
10X_P7_2_CTTTGCGTCTTTAGGG	19	band.form.neutrophil
10X_P7_2_GAAACTCAGCTTCGCG	11	macrophage
10X_P7_2_GAAACTCCACGCTTTC	16	promyelocyte
10X_P7_2_GAAACTCTCGGACAAG	14	monocyte
10X_P7_2_GAAATGAAGCGATGAC	15	conventional.dendritic.cell
10X_P7_2_GAAATGACATGCCACG	2	reticulocyte
10X_P7_2_GAAATGAGTCCGAATT	7	immature.B.cell
10X_P7_2_GAAATGAGTGGCCCTA	19	band.form.neutrophil
10X_P7_2_GAAATGATCACCCGAG	2	reticulocyte
10X_P7_2_GAAATGATCTGTCTCG	12	T.cell
10X_P7_2_GAACATCCATTCGACA	11	macrophage
10X_P7_2_GAACATCTCCAGATCA	2	reticulocyte
10X_P7_2_GAACCTATCAGTCCCT	8	basophil
10X_P7_2_GAACCTATCCCTGACT	7	immature.B.cell
10X_P7_2_GAACCTATCTTTAGGG	14	monocyte
10X_P7_2_GAACCTATCTTTCCTC	20	segmented.neutrophil.of.bone.marrow
10X_P7_2_GAACGGAAGGCGTACA	16	promyelocyte
10X_P7_2_GAACGGACAGGCTCAC	17	neutrophilic.myeloblast
10X_P7_2_GAACGGATCTCTAGGA	19	band.form.neutrophil
10X_P7_2_GAAGCAGCAGTCCTTC	3	erythroblast
10X_P7_2_GAAGCAGGTCTCATCC	19	band.form.neutrophil
10X_P7_2_GAAGCAGTCGATGAGG	9	myelocyte
10X_P7_2_GAATAAGAGAGACTTA	19	band.form.neutrophil
10X_P7_2_GAATAAGGTGGTACAG	18	neutrophilic.metamyelocyte
10X_P7_2_GAATAAGTCGAGCCCA	15	conventional.dendritic.cell
10X_P7_2_GAATAAGTCTTTCCTC	19	band.form.neutrophil
10X_P7_2_GAATGAACAAAGCGGT	19	band.form.neutrophil
10X_P7_2_GAATGAAGTATATCCG	14	monocyte
10X_P7_2_GAATGAAGTCAAGCGA	18	neutrophilic.metamyelocyte
10X_P7_2_GAATGAAGTCGCTTTC	7	immature.B.cell
10X_P7_2_GAATGAAGTTATTCTC	5	early.pro.B.cell
10X_P7_2_GAATGAATCCACGCAG	11	macrophage
10X_P7_2_GACACGCCATTCTCAT	14	monocyte
10X_P7_2_GACACGCTCCACTGGG	20	segmented.neutrophil.of.bone.marrow
10X_P7_2_GACAGAGAGAAGAAGC	10	hematopoietic.stem.cell
10X_P7_2_GACAGAGGTGAGGGTT	16	promyelocyte
10X_P7_2_GACAGAGGTGTAAGTA	16	promyelocyte
10X_P7_2_GACAGAGGTTGCGTTA	18	neutrophilic.metamyelocyte
10X_P7_2_GACCAATAGCTTATCG	18	neutrophilic.metamyelocyte
10X_P7_2_GACCAATAGTCCAGGA	11	macrophage
10X_P7_2_GACCAATGTAACGACG	19	band.form.neutrophil
10X_P7_2_GACCAATGTCTAGTCA	8	basophil
10X_P7_2_GACCAATGTCTTGCGG	1	proerythroblast
10X_P7_2_GACCAATTCGCGGATC	15	conventional.dendritic.cell
10X_P7_2_GACCTGGAGACGCTTT	2	reticulocyte
10X_P7_2_GACCTGGCAAAGGAAG	18	neutrophilic.metamyelocyte
10X_P7_2_GACCTGGTCTACGAGT	11	macrophage
10X_P7_2_GACGCGTAGACATAAC	12	T.cell
10X_P7_2_GACGCGTCACATTTCT	16	promyelocyte
10X_P7_2_GACGCGTGTTCGCGAC	15	conventional.dendritic.cell
10X_P7_2_GACGCGTTCCAAGTAC	10	hematopoietic.stem.cell
10X_P7_2_GACGGCTAGGCGACAT	16	promyelocyte
10X_P7_2_GACGGCTAGGTGACCA	15	conventional.dendritic.cell
10X_P7_2_GACGGCTGTGTCAATC	3	erythroblast
10X_P7_2_GACGGCTGTGTTCGAT	14	monocyte
10X_P7_2_GACGTGCCACTGTGTA	16	promyelocyte
10X_P7_2_GACGTGCTCAGGTTCA	18	neutrophilic.metamyelocyte
10X_P7_2_GACGTGCTCCAAACAC	14	monocyte
10X_P7_2_GACGTGCTCCGCATAA	16	promyelocyte
10X_P7_2_GACGTTAAGGGTCGAT	6	precursor.B.cell
10X_P7_2_GACGTTACATGTAGTC	10	hematopoietic.stem.cell
10X_P7_2_GACTAACAGGCGATAC	19	band.form.neutrophil
10X_P7_2_GACTAACGTACCGCTG	10	hematopoietic.stem.cell
10X_P7_2_GACTAACGTCCAGTTA	18	neutrophilic.metamyelocyte
10X_P7_2_GACTAACGTGTCCTCT	18	neutrophilic.metamyelocyte
10X_P7_2_GACTACAAGATGAGAG	9	myelocyte
10X_P7_2_GACTACACAAGCTGGA	16	promyelocyte
10X_P7_2_GACTACATCTGGTGTA	2	reticulocyte
10X_P7_2_GACTGCGAGCACAGGT	11	macrophage
10X_P7_2_GACTGCGCAAAGCGGT	14	monocyte
10X_P7_2_GACTGCGCACAGGTTT	10	hematopoietic.stem.cell
10X_P7_2_GAGCAGAGTAATCACC	9	myelocyte
10X_P7_2_GAGCAGAGTCATCCCT	10	hematopoietic.stem.cell
10X_P7_2_GAGCAGAGTGACTACT	14	monocyte
10X_P7_2_GAGCAGATCACAGGCC	1	proerythroblast
10X_P7_2_GAGGTGACAAACTGTC	12	T.cell
10X_P7_2_GAGGTGATCGGTCTAA	12	T.cell
10X_P7_2_GAGTCCGAGGTGACCA	10	hematopoietic.stem.cell
10X_P7_2_GAGTCCGCAGGGATTG	12	T.cell
10X_P7_2_GAGTCCGGTCCGAGTC	9	myelocyte
10X_P7_2_GATCAGTAGACAGACC	18	neutrophilic.metamyelocyte
10X_P7_2_GATCAGTAGCCCAGCT	11	macrophage
10X_P7_2_GATCAGTAGTACGCGA	14	monocyte
10X_P7_2_GATCAGTCACCCATGG	15	conventional.dendritic.cell
10X_P7_2_GATCAGTCACTCGACG	3	erythroblast
10X_P7_2_GATCAGTGTAAATGTG	14	monocyte
10X_P7_2_GATCAGTGTCAGCTAT	6	precursor.B.cell
10X_P7_2_GATCAGTGTTGTACAC	18	neutrophilic.metamyelocyte
10X_P7_2_GATCGATAGAGCTGCA	13	mature.B.cell
10X_P7_2_GATCGATAGTAGGCCA	17	neutrophilic.myeloblast
10X_P7_2_GATCGATCACCAGTTA	19	band.form.neutrophil
10X_P7_2_GATCGATTCAACACAC	15	conventional.dendritic.cell
10X_P7_2_GATCGCGAGGATATAC	11	macrophage
10X_P7_2_GATCGCGGTCCCTACT	12	T.cell
10X_P7_2_GATCGCGGTTATGCGT	12	T.cell
10X_P7_2_GATCGCGTCGCAAGCC	19	band.form.neutrophil
10X_P7_2_GATCGCGTCGTAGGAG	19	band.form.neutrophil
10X_P7_2_GATCGTAAGATCGATA	13	mature.B.cell
10X_P7_2_GATCGTATCCCAAGAT	10	hematopoietic.stem.cell
10X_P7_2_GATCGTATCGTTACGA	4	plasma.cell
10X_P7_2_GATCTAGCACAAGTAA	14	monocyte
10X_P7_2_GATCTAGCACCACCAG	3	erythroblast
10X_P7_2_GATCTAGCACCGCTAG	19	band.form.neutrophil
10X_P7_2_GATGAAACACATTCGA	10	hematopoietic.stem.cell
10X_P7_2_GATGAAAGTGACAAAT	9	myelocyte
10X_P7_2_GATGAAAGTGCACTTA	16	promyelocyte
10X_P7_2_GATGAAAGTTACGTCA	8	basophil
10X_P7_2_GATGAGGAGCACCGCT	6	precursor.B.cell
10X_P7_2_GATGAGGAGGTGCACA	9	myelocyte
10X_P7_2_GATGAGGCAGTCGATT	19	band.form.neutrophil
10X_P7_2_GATGAGGCATGGTTGT	10	hematopoietic.stem.cell
10X_P7_2_GATGAGGGTTGATTGC	19	band.form.neutrophil
10X_P7_2_GATGAGGTCAACACCA	18	neutrophilic.metamyelocyte
10X_P7_2_GATGAGGTCCTCCTAG	10	hematopoietic.stem.cell
10X_P7_2_GATGCTAAGTCACGCC	2	reticulocyte
10X_P7_2_GATGCTACATGGGAAC	19	band.form.neutrophil
10X_P7_2_GATGCTAGTACCTACA	14	monocyte
10X_P7_2_GATTCAGAGAGGTACC	12	T.cell
10X_P7_2_GATTCAGTCACTCCTG	9	myelocyte
10X_P7_2_GCAAACTAGATGAGAG	6	precursor.B.cell
10X_P7_2_GCAAACTAGCCTTGAT	8	basophil
10X_P7_2_GCAAACTGTTCTGTTT	19	band.form.neutrophil
10X_P7_2_GCAAACTTCGACAGCC	14	monocyte
10X_P7_2_GCAATCACAGTCGTGC	16	promyelocyte
10X_P7_2_GCAATCATCGAGCCCA	12	T.cell
10X_P7_2_GCAATCATCGGAGCAA	13	mature.B.cell
10X_P7_2_GCAATCATCTAACCGA	19	band.form.neutrophil
10X_P7_2_GCACATACATGGATGG	19	band.form.neutrophil
10X_P7_2_GCACATATCTGAGGGA	16	promyelocyte
10X_P7_2_GCACTCTAGTGCCAGA	1	proerythroblast
10X_P7_2_GCACTCTCAATGGATA	11	macrophage
10X_P7_2_GCACTCTGTACTTGAC	2	reticulocyte
10X_P7_2_GCAGCCAAGGCAAAGA	18	neutrophilic.metamyelocyte
10X_P7_2_GCAGCCACAAGTCATC	4	plasma.cell
10X_P7_2_GCAGCCACAGCTTCGG	12	T.cell
10X_P7_2_GCAGCCACATGATCCA	16	promyelocyte
10X_P7_2_GCAGCCAGTAGATTAG	6	precursor.B.cell
10X_P7_2_GCAGCCATCGGAGCAA	18	neutrophilic.metamyelocyte
10X_P7_2_GCAGCCATCGGCTACG	16	promyelocyte
10X_P7_2_GCAGTTAAGGAGTACC	15	conventional.dendritic.cell
10X_P7_2_GCAGTTAAGGTGACCA	5	early.pro.B.cell
10X_P7_2_GCAGTTACAATAACGA	14	monocyte
10X_P7_2_GCAGTTATCTCAACTT	18	neutrophilic.metamyelocyte
10X_P7_2_GCATACACATGGGACA	9	myelocyte
10X_P7_2_GCATACAGTGACTACT	15	conventional.dendritic.cell
10X_P7_2_GCATACATCGTGACAT	1	proerythroblast
10X_P7_2_GCATGATAGAGACTTA	14	monocyte
10X_P7_2_GCATGATCAGTTAACC	19	band.form.neutrophil
10X_P7_2_GCATGATTCCGCGTTT	2	reticulocyte
10X_P7_2_GCATGATTCTGAGGGA	19	band.form.neutrophil
10X_P7_2_GCATGCGAGAAACCAT	19	band.form.neutrophil
10X_P7_2_GCATGCGAGGTTCCTA	13	mature.B.cell
10X_P7_2_GCATGCGCACGAGAGT	20	segmented.neutrophil.of.bone.marrow
10X_P7_2_GCATGCGCATGAAGTA	14	monocyte
10X_P7_2_GCATGCGGTAAGAGGA	5	early.pro.B.cell
10X_P7_2_GCATGTAAGGGATACC	12	T.cell
10X_P7_2_GCATGTAAGGTGACCA	14	monocyte
10X_P7_2_GCATGTACAAAGGCGT	18	neutrophilic.metamyelocyte
10X_P7_2_GCATGTACAGTCTTCC	14	monocyte
10X_P7_2_GCATGTAGTCCAGTAT	19	band.form.neutrophil
10X_P7_2_GCATGTATCACTTATC	2	reticulocyte
10X_P7_2_GCCAAATAGATCGGGT	3	erythroblast
10X_P7_2_GCCTCTACACTCAGGC	19	band.form.neutrophil
10X_P7_2_GCCTCTACATAAGACA	18	neutrophilic.metamyelocyte
10X_P7_2_GCGACCAAGTGTCTCA	12	T.cell
10X_P7_2_GCGACCATCGTTGACA	5	early.pro.B.cell
10X_P7_2_GCGAGAATCTTCCTTC	20	segmented.neutrophil.of.bone.marrow
10X_P7_2_GCGCAACGTAAAGGAG	11	macrophage
10X_P7_2_GCGCAACGTATAAACG	18	neutrophilic.metamyelocyte
10X_P7_2_GCGCAACGTGTGGTTT	16	promyelocyte
10X_P7_2_GCGCAGTAGGCTACGA	8	basophil
10X_P7_2_GCGCAGTAGTCATCCA	14	monocyte
10X_P7_2_GCGCAGTGTAAGTGGC	12	T.cell
10X_P7_2_GCGCAGTTCCCTAATT	16	promyelocyte
10X_P7_2_GCGCCAACAGCCAATT	19	band.form.neutrophil
10X_P7_2_GCGCCAACAGGTCTCG	7	immature.B.cell
10X_P7_2_GCGCCAACATCACAAC	19	band.form.neutrophil
10X_P7_2_GCGCGATTCCCTAACC	7	immature.B.cell
10X_P7_2_GCGGGTTAGAAACGAG	19	band.form.neutrophil
10X_P7_2_GCGGGTTAGTTACCCA	14	monocyte
10X_P7_2_GCGGGTTGTAAGGGCT	14	monocyte
10X_P7_2_GCGGGTTGTACATCCA	14	monocyte
10X_P7_2_GCGGGTTGTACCGAGA	16	promyelocyte
10X_P7_2_GCGGGTTGTGACGGTA	5	early.pro.B.cell
10X_P7_2_GCGGGTTGTGTGGCTC	9	myelocyte
10X_P7_2_GCGGGTTGTTCAGACT	19	band.form.neutrophil
10X_P7_2_GCGGGTTTCGGAATCT	15	conventional.dendritic.cell
10X_P7_2_GCTCCTAAGTGTTTGC	6	precursor.B.cell
10X_P7_2_GCTCCTAGTATTCGTG	11	macrophage
10X_P7_2_GCTCCTAGTCTCTTTA	2	reticulocyte
10X_P7_2_GCTCCTATCATCGGAT	10	hematopoietic.stem.cell
10X_P7_2_GCTCTGTGTGTAACGG	19	band.form.neutrophil
10X_P7_2_GCTCTGTGTTGGACCC	12	T.cell
10X_P7_2_GCTCTGTTCATTTGGG	19	band.form.neutrophil
10X_P7_2_GCTGCAGCAAGAGGCT	19	band.form.neutrophil
10X_P7_2_GCTGCAGCAGTATGCT	7	immature.B.cell
10X_P7_2_GCTGCAGCATAGGATA	1	proerythroblast
10X_P7_2_GCTGCGAAGTTGAGAT	1	proerythroblast
10X_P7_2_GCTGCGAGTATAATGG	18	neutrophilic.metamyelocyte
10X_P7_2_GCTGCGAGTTAAGTAG	18	neutrophilic.metamyelocyte
10X_P7_2_GCTGCGATCCGATATG	19	band.form.neutrophil
10X_P7_2_GCTGCGATCGGATGTT	14	monocyte
10X_P7_2_GCTGCGATCTGTCTAT	1	proerythroblast
10X_P7_2_GCTGCGATCTTAGCCC	15	conventional.dendritic.cell
10X_P7_2_GCTGCTTAGTAGTGCG	3	erythroblast
10X_P7_2_GCTGCTTGTCCTCCAT	19	band.form.neutrophil
10X_P7_2_GCTGCTTTCCCTAACC	19	band.form.neutrophil
10X_P7_2_GCTGCTTTCTAACGGT	11	macrophage
10X_P7_2_GCTGCTTTCTATCGCC	16	promyelocyte
10X_P7_2_GCTGCTTTCTTGTACT	2	reticulocyte
10X_P7_2_GCTGGGTAGATATGGT	19	band.form.neutrophil
10X_P7_2_GCTGGGTCAGACAGGT	16	promyelocyte
10X_P7_2_GCTGGGTGTATTCGTG	18	neutrophilic.metamyelocyte
10X_P7_2_GCTGGGTGTTATGCGT	1	proerythroblast
10X_P7_2_GCTTCCAAGTTTAGGA	19	band.form.neutrophil
10X_P7_2_GCTTCCACAGGACCCT	20	segmented.neutrophil.of.bone.marrow
10X_P7_2_GCTTCCACATGGTCAT	6	precursor.B.cell
10X_P7_2_GCTTCCAGTCCGAAGA	18	neutrophilic.metamyelocyte
10X_P7_2_GCTTGAAAGTTGTAGA	5	early.pro.B.cell
10X_P7_2_GCTTGAACACCGGAAA	20	segmented.neutrophil.of.bone.marrow
10X_P7_2_GCTTGAACATTCACTT	15	conventional.dendritic.cell
10X_P7_2_GCTTGAAGTAAGAGGA	10	hematopoietic.stem.cell
10X_P7_2_GCTTGAAGTTAGTGGG	14	monocyte
10X_P7_2_GGAAAGCCAGGGTACA	15	conventional.dendritic.cell
10X_P7_2_GGAAAGCGTCACAAGG	16	promyelocyte
10X_P7_2_GGAAAGCGTCTAAAGA	17	neutrophilic.myeloblast
10X_P7_2_GGAAAGCTCTACCAGA	18	neutrophilic.metamyelocyte
10X_P7_2_GGAACTTAGGCGTACA	16	promyelocyte
10X_P7_2_GGAACTTAGTTCCACA	10	hematopoietic.stem.cell
10X_P7_2_GGAACTTCAAGTTGTC	2	reticulocyte
10X_P7_2_GGAATAACATGGTTGT	12	T.cell
10X_P7_2_GGACAAGCAAGCTGTT	19	band.form.neutrophil
10X_P7_2_GGACAAGCAGCAGTTT	14	monocyte
10X_P7_2_GGACAAGCATGAACCT	12	T.cell
10X_P7_2_GGACAAGGTCGACTAT	9	myelocyte
10X_P7_2_GGACAAGTCGCTTAGA	19	band.form.neutrophil
10X_P7_2_GGACAGAAGCGATCCC	15	conventional.dendritic.cell
10X_P7_2_GGACAGAGTACTTAGC	6	precursor.B.cell
10X_P7_2_GGACAGAGTCCGTTAA	2	reticulocyte
10X_P7_2_GGACAGATCCGAGCCA	19	band.form.neutrophil
10X_P7_2_GGACATTAGAGGTAGA	10	hematopoietic.stem.cell
10X_P7_2_GGACATTCACGACGAA	20	segmented.neutrophil.of.bone.marrow
10X_P7_2_GGACATTGTGACAAAT	9	myelocyte
10X_P7_2_GGACATTGTTGGTTTG	11	macrophage
10X_P7_2_GGACATTTCCTGCCAT	20	segmented.neutrophil.of.bone.marrow
10X_P7_2_GGACGTCCAAGCTGGA	19	band.form.neutrophil
10X_P7_2_GGACGTCCAGTTCATG	18	neutrophilic.metamyelocyte
10X_P7_2_GGACGTCGTCTTCTCG	14	monocyte
10X_P7_2_GGAGCAAAGGCAGTCA	20	segmented.neutrophil.of.bone.marrow
10X_P7_2_GGAGCAAAGTGTGAAT	16	promyelocyte
10X_P7_2_GGAGCAACACTAAGTC	14	monocyte
10X_P7_2_GGAGCAAGTGTTTGGT	16	promyelocyte
10X_P7_2_GGAGCAATCCACGAAT	14	monocyte
10X_P7_2_GGATGTTCAATGGATA	19	band.form.neutrophil
10X_P7_2_GGATGTTGTAATTGGA	12	T.cell
10X_P7_2_GGATGTTTCATCATTC	14	monocyte
10X_P7_2_GGATGTTTCCGGCACA	19	band.form.neutrophil
10X_P7_2_GGATTACAGTACCGGA	3	erythroblast
10X_P7_2_GGATTACCACACATGT	19	band.form.neutrophil
10X_P7_2_GGATTACTCCGAACGC	19	band.form.neutrophil
10X_P7_2_GGCAATTCACCACGTG	19	band.form.neutrophil
10X_P7_2_GGCAATTCACGGCCAT	20	segmented.neutrophil.of.bone.marrow
10X_P7_2_GGCAATTGTGACTACT	2	reticulocyte
10X_P7_2_GGCAATTGTTCAGCGC	2	reticulocyte
10X_P7_2_GGCAATTGTTGCGTTA	5	early.pro.B.cell
10X_P7_2_GGCAATTTCCAAGCCG	9	myelocyte
10X_P7_2_GGCCGATCACTCAGGC	11	macrophage
10X_P7_2_GGCCGATTCGGCCGAT	18	neutrophilic.metamyelocyte
10X_P7_2_GGCGACTCAAGGCTCC	14	monocyte
10X_P7_2_GGCGACTGTTCGCTAA	10	hematopoietic.stem.cell
10X_P7_2_GGCGACTTCTTTACGT	10	hematopoietic.stem.cell
10X_P7_2_GGCGTGTAGGTGCTAG	19	band.form.neutrophil
10X_P7_2_GGCGTGTCAATGGTCT	11	macrophage
10X_P7_2_GGCGTGTCAGGCGATA	19	band.form.neutrophil
10X_P7_2_GGCGTGTCATCGACGC	6	precursor.B.cell
10X_P7_2_GGCGTGTGTTCCATGA	20	segmented.neutrophil.of.bone.marrow
10X_P7_2_GGCTCGACAGGTGGAT	14	monocyte
10X_P7_2_GGCTCGATCAGTTTGG	10	hematopoietic.stem.cell
10X_P7_2_GGCTGGTCAACACCTA	20	segmented.neutrophil.of.bone.marrow
10X_P7_2_GGCTGGTTCGAGAGCA	12	T.cell
10X_P7_2_GGGAATGAGCGAGAAA	15	conventional.dendritic.cell
10X_P7_2_GGGAATGCAAGGACTG	3	erythroblast
10X_P7_2_GGGACCTAGGTCATCT	10	hematopoietic.stem.cell
10X_P7_2_GGGACCTTCGGCGCAT	14	monocyte
10X_P7_2_GGGAGATGTAGCCTCG	16	promyelocyte
10X_P7_2_GGGAGATGTGTGCGTC	18	neutrophilic.metamyelocyte
10X_P7_2_GGGAGATTCTCTTATG	18	neutrophilic.metamyelocyte
10X_P7_2_GGGAGATTCTGCCAGG	19	band.form.neutrophil
10X_P7_2_GGGAGATTCTTTCCTC	14	monocyte
10X_P7_2_GGGATGACATCGATTG	19	band.form.neutrophil
10X_P7_2_GGGATGACATCTATGG	6	precursor.B.cell
10X_P7_2_GGGATGACATGACGGA	20	segmented.neutrophil.of.bone.marrow
10X_P7_2_GGGATGATCAAACCAC	16	promyelocyte
10X_P7_2_GGGCACTAGTGTTGAA	19	band.form.neutrophil
10X_P7_2_GGGCACTAGTTCGCGC	18	neutrophilic.metamyelocyte
10X_P7_2_GGGCACTGTTAAGACA	2	reticulocyte
10X_P7_2_GGGCATCCAATCTGCA	1	proerythroblast
10X_P7_2_GGGCATCCAGTCACTA	19	band.form.neutrophil
10X_P7_2_GGGTCTGAGTCCGGTC	18	neutrophilic.metamyelocyte
10X_P7_2_GGGTCTGGTCCAAGTT	9	myelocyte
10X_P7_2_GGGTCTGGTCCGCTGA	1	proerythroblast
10X_P7_2_GGGTCTGGTCTAACGT	7	immature.B.cell
10X_P7_2_GGGTCTGGTGCACTTA	17	neutrophilic.myeloblast
10X_P7_2_GGGTCTGGTGCCTGTG	12	T.cell
10X_P7_2_GGGTCTGGTTCCTCCA	7	immature.B.cell
10X_P7_2_GGGTTGCCACAGGTTT	20	segmented.neutrophil.of.bone.marrow
10X_P7_2_GGGTTGCGTCTCATCC	16	promyelocyte
10X_P7_2_GGGTTGCGTTCGTTGA	16	promyelocyte
10X_P7_2_GGGTTGCTCCAGAGGA	14	monocyte
10X_P7_2_GGTATTGGTATTAGCC	18	neutrophilic.metamyelocyte
10X_P7_2_GGTATTGGTCACTTCC	15	conventional.dendritic.cell
10X_P7_2_GGTATTGTCAACGGGA	15	conventional.dendritic.cell
10X_P7_2_GGTGAAGAGCAATCTC	19	band.form.neutrophil
10X_P7_2_GGTGAAGGTCTCCCTA	10	hematopoietic.stem.cell
10X_P7_2_GGTGAAGGTGCATCTA	2	reticulocyte
10X_P7_2_GGTGCGTCAACCGCCA	20	segmented.neutrophil.of.bone.marrow
10X_P7_2_GGTGCGTCAGCGTTCG	10	hematopoietic.stem.cell
10X_P7_2_GGTGCGTGTCCATCCT	13	mature.B.cell
10X_P7_2_GGTGTTAAGCCTCGTG	11	macrophage
10X_P7_2_GGTGTTAAGGATCGCA	14	monocyte
10X_P7_2_GGTGTTACAAACGTGG	19	band.form.neutrophil
10X_P7_2_GGTGTTATCTTGGGTA	19	band.form.neutrophil
10X_P7_2_GTAACGTAGAAGATTC	11	macrophage
10X_P7_2_GTAACGTAGGCTCTTA	12	T.cell
10X_P7_2_GTAACTGCATGGGAAC	18	neutrophilic.metamyelocyte
10X_P7_2_GTACGTACATAGTAAG	19	band.form.neutrophil
10X_P7_2_GTACGTAGTTCGTGAT	10	hematopoietic.stem.cell
10X_P7_2_GTACGTATCATAGCAC	16	promyelocyte
10X_P7_2_GTACTCCAGACAAAGG	14	monocyte
10X_P7_2_GTACTCCAGCAGATCG	19	band.form.neutrophil
10X_P7_2_GTACTCCAGGCTACGA	12	T.cell
10X_P7_2_GTACTCCCACATCCGG	18	neutrophilic.metamyelocyte
10X_P7_2_GTACTCCCAGGTCGTC	17	neutrophilic.myeloblast
10X_P7_2_GTACTCCTCGGAGGTA	9	myelocyte
10X_P7_2_GTACTTTGTACAGCAG	10	hematopoietic.stem.cell
10X_P7_2_GTACTTTTCATCTGCC	19	band.form.neutrophil
10X_P7_2_GTACTTTTCGCTTAGA	3	erythroblast
10X_P7_2_GTAGGCCAGCACACAG	13	mature.B.cell
10X_P7_2_GTAGGCCAGTACACCT	16	promyelocyte
10X_P7_2_GTAGGCCCATTCCTGC	19	band.form.neutrophil
10X_P7_2_GTAGGCCCATTTCACT	12	T.cell
10X_P7_2_GTAGGCCGTCTCCACT	9	myelocyte
10X_P7_2_GTAGTCATCAGAGGTG	19	band.form.neutrophil
10X_P7_2_GTATCTTAGTTTCCTT	18	neutrophilic.metamyelocyte
10X_P7_2_GTATCTTCATCACCCT	19	band.form.neutrophil
10X_P7_2_GTATCTTGTAAGAGGA	9	myelocyte
10X_P7_2_GTATCTTGTAAGGGCT	19	band.form.neutrophil
10X_P7_2_GTATCTTTCTACTTAC	6	precursor.B.cell
10X_P7_2_GTATCTTTCTGTCCGT	14	monocyte
10X_P7_2_GTATTCTAGAACTCGG	19	band.form.neutrophil
10X_P7_2_GTATTCTAGGCCCGTT	11	macrophage
10X_P7_2_GTATTCTAGGGCTCTC	5	early.pro.B.cell
10X_P7_2_GTATTCTAGGGTCTCC	11	macrophage
10X_P7_2_GTATTCTCAAAGTGCG	7	immature.B.cell
10X_P7_2_GTATTCTGTTCCCGAG	1	proerythroblast
10X_P7_2_GTATTCTGTTTGTGTG	11	macrophage
10X_P7_2_GTATTCTTCCTACAGA	5	early.pro.B.cell
10X_P7_2_GTATTCTTCCTTGACC	5	early.pro.B.cell
10X_P7_2_GTCAAGTAGATGAGAG	7	immature.B.cell
10X_P7_2_GTCAAGTCACTCTGTC	6	precursor.B.cell
10X_P7_2_GTCAAGTGTTAAAGTG	19	band.form.neutrophil
10X_P7_2_GTCAAGTGTTACGACT	6	precursor.B.cell
10X_P7_2_GTCAAGTTCCCTAACC	11	macrophage
10X_P7_2_GTCACAAGTGAGTGAC	19	band.form.neutrophil
10X_P7_2_GTCACGGGTTTGACAC	17	neutrophilic.myeloblast
10X_P7_2_GTCACGGTCCATGAAC	18	neutrophilic.metamyelocyte
10X_P7_2_GTCACGGTCTTGAGGT	19	band.form.neutrophil
10X_P7_2_GTCATTTGTTCACGGC	8	basophil
10X_P7_2_GTCCTCACATTGGCGC	19	band.form.neutrophil
10X_P7_2_GTCCTCAGTGAGTGAC	14	monocyte
10X_P7_2_GTCCTCATCACTCCTG	9	myelocyte
10X_P7_2_GTCCTCATCCACGACG	6	precursor.B.cell
10X_P7_2_GTCCTCATCGCGATCG	16	promyelocyte
10X_P7_2_GTCGGGTAGTGGCACA	7	immature.B.cell
10X_P7_2_GTCGGGTGTTACGCGC	19	band.form.neutrophil
10X_P7_2_GTCGGGTTCAAACCGT	18	neutrophilic.metamyelocyte
10X_P7_2_GTCGGGTTCAGTTAGC	6	precursor.B.cell
10X_P7_2_GTCGTAAGTAGCGATG	12	T.cell
10X_P7_2_GTCGTAATCCTTAATC	18	neutrophilic.metamyelocyte
10X_P7_2_GTCGTAATCGGAATCT	19	band.form.neutrophil
10X_P7_2_GTCTCGTCACATGACT	19	band.form.neutrophil
10X_P7_2_GTCTTCGAGAGGGATA	6	precursor.B.cell
10X_P7_2_GTCTTCGCAGTAAGAT	14	monocyte
10X_P7_2_GTCTTCGTCAGAGCTT	2	reticulocyte
10X_P7_2_GTCTTCGTCAGCTGGC	7	immature.B.cell
10X_P7_2_GTGAAGGAGTGCGTGA	10	hematopoietic.stem.cell
10X_P7_2_GTGAAGGAGTGTCCAT	14	monocyte
10X_P7_2_GTGAAGGCACAAGCCC	19	band.form.neutrophil
10X_P7_2_GTGAAGGGTCTCCACT	10	hematopoietic.stem.cell
10X_P7_2_GTGAAGGTCGCGATCG	18	neutrophilic.metamyelocyte
10X_P7_2_GTGCAGCAGCCTTGAT	11	macrophage
10X_P7_2_GTGCAGCTCAGTCCCT	17	neutrophilic.myeloblast
10X_P7_2_GTGCATAAGTGGGCTA	5	early.pro.B.cell
10X_P7_2_GTGCATACAGTCCTTC	20	segmented.neutrophil.of.bone.marrow
10X_P7_2_GTGCATAGTGTTAAGA	1	proerythroblast
10X_P7_2_GTGCATATCCTCAACC	19	band.form.neutrophil
10X_P7_2_GTGCGGTCAATGTTGC	12	T.cell
10X_P7_2_GTGCGGTGTCTTGCGG	2	reticulocyte
10X_P7_2_GTGCGGTGTGGCAAAC	11	macrophage
10X_P7_2_GTGCGGTGTGTTTGGT	10	hematopoietic.stem.cell
10X_P7_2_GTGCTTCAGCAATATG	19	band.form.neutrophil
10X_P7_2_GTGCTTCCACCTGGTG	9	myelocyte
10X_P7_2_GTGCTTCCAGTGAGTG	17	neutrophilic.myeloblast
10X_P7_2_GTGCTTCGTAAAGTCA	9	myelocyte
10X_P7_2_GTGCTTCGTGAGTATA	15	conventional.dendritic.cell
10X_P7_2_GTGCTTCGTGTTTGGT	14	monocyte
10X_P7_2_GTGCTTCTCCCAAGTA	18	neutrophilic.metamyelocyte
10X_P7_2_GTGGGTCAGAGTACAT	12	T.cell
10X_P7_2_GTGGGTCCAAACTGTC	10	hematopoietic.stem.cell
10X_P7_2_GTGGGTCTCAAACCAC	19	band.form.neutrophil
10X_P7_2_GTGGGTCTCACAATGC	11	macrophage
10X_P7_2_GTGGGTCTCTTGTTTG	14	monocyte
10X_P7_2_GTGTGCGAGTACGATA	19	band.form.neutrophil
10X_P7_2_GTGTGCGAGTTACGGG	1	proerythroblast
10X_P7_2_GTGTGCGGTAGCGCAA	9	myelocyte
10X_P7_2_GTGTGCGGTGGTCCGT	18	neutrophilic.metamyelocyte
10X_P7_2_GTGTGCGTCGGTGTCG	19	band.form.neutrophil
10X_P7_2_GTGTGCGTCTTGGGTA	17	neutrophilic.myeloblast
10X_P7_2_GTGTTAGAGAAGGGTA	6	precursor.B.cell
10X_P7_2_GTGTTAGAGCCAGTTT	19	band.form.neutrophil
10X_P7_2_GTGTTAGCATGCATGT	7	immature.B.cell
10X_P7_2_GTGTTAGTCTCACATT	10	hematopoietic.stem.cell
10X_P7_2_GTTAAGCAGGGCTTGA	6	precursor.B.cell
10X_P7_2_GTTAAGCGTTCGGGCT	15	conventional.dendritic.cell
10X_P7_2_GTTAAGCGTTGAACTC	12	T.cell
10X_P7_2_GTTACAGAGCGGATCA	19	band.form.neutrophil
10X_P7_2_GTTACAGAGGACAGCT	14	monocyte
10X_P7_2_GTTACAGAGTCAATAG	15	conventional.dendritic.cell
10X_P7_2_GTTACAGCAATAACGA	12	T.cell
10X_P7_2_GTTACAGGTAGCTGCC	11	macrophage
10X_P7_2_GTTCATTAGTAAGTAC	20	segmented.neutrophil.of.bone.marrow
10X_P7_2_GTTCATTAGTCGTACT	18	neutrophilic.metamyelocyte
10X_P7_2_GTTCATTCAGCGTTCG	14	monocyte
10X_P7_2_GTTCATTGTCAGATAA	2	reticulocyte
10X_P7_2_GTTCATTTCCACGTGG	19	band.form.neutrophil
10X_P7_2_GTTCGGGAGCAGATCG	1	proerythroblast
10X_P7_2_GTTCGGGAGTTCGCGC	18	neutrophilic.metamyelocyte
10X_P7_2_GTTCTCGAGCCTCGTG	9	myelocyte
10X_P7_2_GTTTCTAAGTTTGCGT	14	monocyte
10X_P7_2_GTTTCTACAGAGCCAA	16	promyelocyte
10X_P7_2_GTTTCTACAGGCTGAA	19	band.form.neutrophil
10X_P7_2_TAAACCGGTCTCCCTA	13	mature.B.cell
10X_P7_2_TAAACCGGTTATGTGC	10	hematopoietic.stem.cell
10X_P7_2_TAAACCGTCATACGGT	12	T.cell
10X_P7_2_TAAACCGTCGGATGTT	12	T.cell
10X_P7_2_TAAGAGAAGCGTTCCG	1	proerythroblast
10X_P7_2_TAAGAGAGTGATGCCC	10	hematopoietic.stem.cell
10X_P7_2_TAAGCGTAGTCCGGTC	6	precursor.B.cell
10X_P7_2_TAAGTGCGTCTCTCTG	11	macrophage
10X_P7_2_TAAGTGCGTGTTTGGT	18	neutrophilic.metamyelocyte
10X_P7_2_TAAGTGCTCAGTTGAC	9	myelocyte
10X_P7_2_TACACGAGTAGAAGGA	18	neutrophilic.metamyelocyte
10X_P7_2_TACACGATCAGGTAAA	19	band.form.neutrophil
10X_P7_2_TACACGATCGCCTGTT	13	mature.B.cell
10X_P7_2_TACAGTGAGATAGCAT	18	neutrophilic.metamyelocyte
10X_P7_2_TACAGTGAGCGTTGCC	8	basophil
10X_P7_2_TACAGTGAGTGTACCT	14	monocyte
10X_P7_2_TACAGTGGTGGGTCAA	10	hematopoietic.stem.cell
10X_P7_2_TACCTATAGCAGATCG	12	T.cell
10X_P7_2_TACCTATTCCAAACTG	14	monocyte
10X_P7_2_TACCTATTCTAACGGT	7	immature.B.cell
10X_P7_2_TACCTTAAGATCCCAT	6	precursor.B.cell
10X_P7_2_TACCTTAGTTTAGCTG	14	monocyte
10X_P7_2_TACCTTATCAGCATGT	2	reticulocyte
10X_P7_2_TACCTTATCCAGGGCT	2	reticulocyte
10X_P7_2_TACCTTATCGTTTGCC	19	band.form.neutrophil
10X_P7_2_TACGGATAGTGCGATG	20	segmented.neutrophil.of.bone.marrow
10X_P7_2_TACGGATGTCCATCCT	19	band.form.neutrophil
10X_P7_2_TACGGATGTGAGTATA	15	conventional.dendritic.cell
10X_P7_2_TACGGATTCACGGTTA	9	myelocyte
10X_P7_2_TACGGGCCAAAGGAAG	18	neutrophilic.metamyelocyte
10X_P7_2_TACGGGCCAATGGATA	16	promyelocyte
10X_P7_2_TACGGGCCAGTAGAGC	19	band.form.neutrophil
10X_P7_2_TACGGGCGTTAGGGTG	14	monocyte
10X_P7_2_TACGGGCTCACCGTAA	18	neutrophilic.metamyelocyte
10X_P7_2_TACGGTACAAACCTAC	14	monocyte
10X_P7_2_TACGGTACAGGTGCCT	18	neutrophilic.metamyelocyte
10X_P7_2_TACGGTACATCCGTGG	16	promyelocyte
10X_P7_2_TACGGTATCAGGTTCA	1	proerythroblast
10X_P7_2_TACTCATCAATGAATG	19	band.form.neutrophil
10X_P7_2_TACTCATCATGGTCAT	18	neutrophilic.metamyelocyte
10X_P7_2_TACTCATCATGTAGTC	15	conventional.dendritic.cell
10X_P7_2_TACTCATGTACCCAAT	12	T.cell
10X_P7_2_TACTCGCAGACTAGGC	19	band.form.neutrophil
10X_P7_2_TACTCGCGTACTCAAC	19	band.form.neutrophil
10X_P7_2_TACTCGCGTCGTGGCT	18	neutrophilic.metamyelocyte
10X_P7_2_TACTTACCAGCTGTTA	18	neutrophilic.metamyelocyte
10X_P7_2_TACTTACTCAAGATCC	18	neutrophilic.metamyelocyte
10X_P7_2_TACTTGTAGAACAACT	19	band.form.neutrophil
10X_P7_2_TACTTGTCAGACGCTC	7	immature.B.cell
10X_P7_2_TACTTGTCATTAGGCT	9	myelocyte
10X_P7_2_TACTTGTGTACGAAAT	12	T.cell
10X_P7_2_TACTTGTGTCGAATCT	14	monocyte
10X_P7_2_TACTTGTGTCGCATCG	17	neutrophilic.myeloblast
10X_P7_2_TACTTGTGTTCACCTC	2	reticulocyte
10X_P7_2_TACTTGTTCGGGAGTA	10	hematopoietic.stem.cell
10X_P7_2_TACTTGTTCGTTACGA	14	monocyte
10X_P7_2_TACTTGTTCTGCTGTC	14	monocyte
10X_P7_2_TAGACCACAGTATAAG	14	monocyte
10X_P7_2_TAGACCATCGCCAGCA	19	band.form.neutrophil
10X_P7_2_TAGAGCTAGCCCAGCT	14	monocyte
10X_P7_2_TAGAGCTGTAGCGTCC	12	T.cell
10X_P7_2_TAGAGCTGTGTCGCTG	12	T.cell
10X_P7_2_TAGCCGGTCTCTTATG	18	neutrophilic.metamyelocyte
10X_P7_2_TAGGCATCACATGACT	19	band.form.neutrophil
10X_P7_2_TAGGCATTCGGTTCGG	9	myelocyte
10X_P7_2_TAGTGGTCACATGGGA	13	mature.B.cell
10X_P7_2_TAGTGGTGTTGACGTT	1	proerythroblast
10X_P7_2_TAGTGGTTCCGCATCT	13	mature.B.cell
10X_P7_2_TAGTTGGCACCGCTAG	19	band.form.neutrophil
10X_P7_2_TAGTTGGGTTCGGCAC	11	macrophage
10X_P7_2_TAGTTGGTCTTCGGTC	11	macrophage
10X_P7_2_TATCAGGAGAGAGCTC	18	neutrophilic.metamyelocyte
10X_P7_2_TATCAGGAGGGTCTCC	2	reticulocyte
10X_P7_2_TATCAGGCAGCTGTTA	19	band.form.neutrophil
10X_P7_2_TATCAGGGTCCAAGTT	14	monocyte
10X_P7_2_TATCAGGTCATATCGG	19	band.form.neutrophil
10X_P7_2_TATCTCACACCATGTA	16	promyelocyte
10X_P7_2_TATCTCACAGACACTT	10	hematopoietic.stem.cell
10X_P7_2_TATCTCATCGTGGACC	14	monocyte
10X_P7_2_TATGCCCAGAGGTACC	20	segmented.neutrophil.of.bone.marrow
10X_P7_2_TATGCCCAGTCAAGCG	18	neutrophilic.metamyelocyte
10X_P7_2_TATGCCCAGTGAACGC	3	erythroblast
10X_P7_2_TATGCCCAGTGGTAAT	6	precursor.B.cell
10X_P7_2_TATGCCCGTATCGCAT	11	macrophage
10X_P7_2_TATGCCCTCAGAGGTG	16	promyelocyte
10X_P7_2_TATTACCCAACTGCGC	16	promyelocyte
10X_P7_2_TATTACCGTTCACCTC	18	neutrophilic.metamyelocyte
10X_P7_2_TATTACCGTTGTCGCG	16	promyelocyte
10X_P7_2_TATTACCTCTTTAGTC	6	precursor.B.cell
10X_P7_2_TCAACGACAAAGCAAT	10	hematopoietic.stem.cell
10X_P7_2_TCAACGACAATCGGTT	8	basophil
10X_P7_2_TCAACGATCCTCAACC	19	band.form.neutrophil
10X_P7_2_TCAATCTTCCTATGTT	16	promyelocyte
10X_P7_2_TCACAAGAGAATTCCC	6	precursor.B.cell
10X_P7_2_TCACGAAAGCCTATGT	12	T.cell
10X_P7_2_TCACGAAAGCTCAACT	8	basophil
10X_P7_2_TCAGATGAGTTCCACA	18	neutrophilic.metamyelocyte
10X_P7_2_TCAGATGCAGCTGCTG	7	immature.B.cell
10X_P7_2_TCAGATGGTATATGAG	12	T.cell
10X_P7_2_TCAGCAACACTTACGA	16	promyelocyte
10X_P7_2_TCAGCAACATCGGGTC	14	monocyte
10X_P7_2_TCAGCAAGTCACTGGC	14	monocyte
10X_P7_2_TCAGCAAGTGAGGGTT	8	basophil
10X_P7_2_TCAGCAATCAACGCTA	19	band.form.neutrophil
10X_P7_2_TCAGCAATCAGCATGT	14	monocyte
10X_P7_2_TCAGCTCAGAAACGAG	8	basophil
10X_P7_2_TCAGCTCCACTGAAGG	18	neutrophilic.metamyelocyte
10X_P7_2_TCAGCTCGTACTCGCG	9	myelocyte
10X_P7_2_TCAGCTCGTGACAAAT	12	T.cell
10X_P7_2_TCAGCTCTCAGCATGT	8	basophil
10X_P7_2_TCAGCTCTCCTAGAAC	5	early.pro.B.cell
10X_P7_2_TCAGCTCTCGGAATCT	1	proerythroblast
10X_P7_2_TCAGCTCTCTCTAAGG	6	precursor.B.cell
10X_P7_2_TCAGGATAGAGACTAT	18	neutrophilic.metamyelocyte
10X_P7_2_TCAGGATTCCATGAAC	6	precursor.B.cell
10X_P7_2_TCAGGTACAGCCAATT	18	neutrophilic.metamyelocyte
10X_P7_2_TCATTACAGATGGGTC	19	band.form.neutrophil
10X_P7_2_TCATTACAGCGTTGCC	9	myelocyte
10X_P7_2_TCATTACAGGACTGGT	6	precursor.B.cell
10X_P7_2_TCATTACCAGTGACAG	9	myelocyte
10X_P7_2_TCATTACGTCGGCACT	9	myelocyte
10X_P7_2_TCATTACTCCGAGCCA	13	mature.B.cell
10X_P7_2_TCATTTGAGTGGACGT	2	reticulocyte
10X_P7_2_TCATTTGCAAGGCTCC	17	neutrophilic.myeloblast
10X_P7_2_TCATTTGCAGTCGTGC	14	monocyte
10X_P7_2_TCATTTGGTCAGAATA	14	monocyte
10X_P7_2_TCCACACCAGCTGTGC	19	band.form.neutrophil
10X_P7_2_TCCACACTCCAGATCA	14	monocyte
10X_P7_2_TCCACACTCCAGGGCT	20	segmented.neutrophil.of.bone.marrow
10X_P7_2_TCCCGATAGACCGGAT	14	monocyte
10X_P7_2_TCCCGATAGACTAAGT	18	neutrophilic.metamyelocyte
10X_P7_2_TCCCGATCACATCCGG	14	monocyte
10X_P7_2_TCCCGATCAGTATCTG	19	band.form.neutrophil
10X_P7_2_TCCCGATCATGGTCTA	19	band.form.neutrophil
10X_P7_2_TCCCGATGTAACGCGA	14	monocyte
10X_P7_2_TCCCGATTCAGTTTGG	14	monocyte
10X_P7_2_TCCCGATTCATCGATG	19	band.form.neutrophil
10X_P7_2_TCGAGGCGTAAACCTC	7	immature.B.cell
10X_P7_2_TCGAGGCTCACTCCTG	19	band.form.neutrophil
10X_P7_2_TCGAGGCTCAGTCCCT	19	band.form.neutrophil
10X_P7_2_TCGCGAGAGAAGGGTA	6	precursor.B.cell
10X_P7_2_TCGCGAGAGTTATCGC	1	proerythroblast
10X_P7_2_TCGCGAGGTACGAAAT	11	macrophage
10X_P7_2_TCGCGAGGTGAGTATA	16	promyelocyte
10X_P7_2_TCGCGAGTCAACGAAA	18	neutrophilic.metamyelocyte
10X_P7_2_TCGCGAGTCGTGGACC	13	mature.B.cell
10X_P7_2_TCGCGTTAGACACGAC	18	neutrophilic.metamyelocyte
10X_P7_2_TCGCGTTCAAAGTCAA	6	precursor.B.cell
10X_P7_2_TCGCGTTCAGATGGGT	14	monocyte
10X_P7_2_TCGCGTTGTCCAGTGC	14	monocyte
10X_P7_2_TCGCGTTGTTGGTGGA	16	promyelocyte
10X_P7_2_TCGCGTTTCCCTTGTG	7	immature.B.cell
10X_P7_2_TCGCGTTTCGTACCGG	9	myelocyte
10X_P7_2_TCGGGACAGAAGGACA	18	neutrophilic.metamyelocyte
10X_P7_2_TCGGGACGTGTAATGA	17	neutrophilic.myeloblast
10X_P7_2_TCGGTAAAGGCGTACA	9	myelocyte
10X_P7_2_TCGGTAACACTGTGTA	14	monocyte
10X_P7_2_TCGGTAACATTGCGGC	12	T.cell
10X_P7_2_TCGGTAAGTAGATTAG	6	precursor.B.cell
10X_P7_2_TCGGTAATCCCAACGG	12	T.cell
10X_P7_2_TCGTACCAGAATGTGT	9	myelocyte
10X_P7_2_TCGTACCAGGACTGGT	7	immature.B.cell
10X_P7_2_TCGTAGACAAACGCGA	17	neutrophilic.myeloblast
10X_P7_2_TCGTAGAGTATGAAAC	20	segmented.neutrophil.of.bone.marrow
10X_P7_2_TCGTAGATCATACGGT	19	band.form.neutrophil
10X_P7_2_TCGTAGATCTTCGAGA	3	erythroblast
10X_P7_2_TCTATTGAGAAGATTC	16	promyelocyte
10X_P7_2_TCTATTGAGGACGAAA	16	promyelocyte
10X_P7_2_TCTATTGAGGTGTTAA	19	band.form.neutrophil
10X_P7_2_TCTATTGTCTATCCCG	15	conventional.dendritic.cell
10X_P7_2_TCTCATAGTTTACTCT	16	promyelocyte
10X_P7_2_TCTCTAACAGAGTGTG	11	macrophage
10X_P7_2_TCTCTAAGTTCCACGG	2	reticulocyte
10X_P7_2_TCTGAGAAGTTATCGC	9	myelocyte
10X_P7_2_TCTGGAAAGCCACCTG	14	monocyte
10X_P7_2_TCTGGAACATTCTCAT	6	precursor.B.cell
10X_P7_2_TCTGGAAGTTCAGCGC	12	T.cell
10X_P7_2_TCTGGAATCGCGGATC	13	mature.B.cell
10X_P7_2_TCTTCGGAGCTAGTGG	7	immature.B.cell
10X_P7_2_TCTTCGGCACATCCGG	10	hematopoietic.stem.cell
10X_P7_2_TCTTCGGTCAGGTAAA	11	macrophage
10X_P7_2_TCTTCGGTCGGTGTTA	14	monocyte
10X_P7_2_TCTTTCCAGACCACGA	14	monocyte
10X_P7_2_TCTTTCCAGTGGTAGC	14	monocyte
10X_P7_2_TCTTTCCCACATTTCT	19	band.form.neutrophil
10X_P7_2_TCTTTCCCATCTCGCT	14	monocyte
10X_P7_2_TCTTTCCCATGTCCTC	16	promyelocyte
10X_P7_2_TCTTTCCGTGTAATGA	5	early.pro.B.cell
10X_P7_2_TCTTTCCTCTCCCTGA	3	erythroblast
10X_P7_2_TGAAAGAAGACGACGT	19	band.form.neutrophil
10X_P7_2_TGAAAGAAGGGATACC	14	monocyte
10X_P7_2_TGAAAGACAACTGCTA	5	early.pro.B.cell
10X_P7_2_TGAAAGATCATTGCCC	19	band.form.neutrophil
10X_P7_2_TGACAACCACTGTTAG	9	myelocyte
10X_P7_2_TGACAACTCCGGGTGT	14	monocyte
10X_P7_2_TGACGGCAGCTGTTCA	19	band.form.neutrophil
10X_P7_2_TGACGGCAGGGTGTGT	14	monocyte
10X_P7_2_TGACGGCAGTAACCCT	6	precursor.B.cell
10X_P7_2_TGACGGCCACGAGAGT	2	reticulocyte
10X_P7_2_TGACGGCGTCGACTAT	10	hematopoietic.stem.cell
10X_P7_2_TGACGGCGTGCGCTTG	2	reticulocyte
10X_P7_2_TGACGGCTCAACGGCC	7	immature.B.cell
10X_P7_2_TGACTAGAGACGCTTT	13	mature.B.cell
10X_P7_2_TGACTAGAGGCACATG	19	band.form.neutrophil
10X_P7_2_TGACTAGGTCGGATCC	1	proerythroblast
10X_P7_2_TGACTTTAGTTTCCTT	10	hematopoietic.stem.cell
10X_P7_2_TGACTTTCAAGTACCT	9	myelocyte
10X_P7_2_TGACTTTGTAGCGATG	17	neutrophilic.myeloblast
10X_P7_2_TGACTTTTCTGCGGCA	19	band.form.neutrophil
10X_P7_2_TGAGAGGAGACAGACC	18	neutrophilic.metamyelocyte
10X_P7_2_TGAGAGGAGTAGGCCA	13	mature.B.cell
10X_P7_2_TGAGAGGGTAGAGGAA	16	promyelocyte
10X_P7_2_TGAGAGGTCGTAGGAG	20	segmented.neutrophil.of.bone.marrow
10X_P7_2_TGAGCATAGCCTATGT	18	neutrophilic.metamyelocyte
10X_P7_2_TGAGCCGAGTTGAGTA	16	promyelocyte
10X_P7_2_TGAGCCGGTAGAAAGG	17	neutrophilic.myeloblast
10X_P7_2_TGAGCCGGTGTTTGGT	18	neutrophilic.metamyelocyte
10X_P7_2_TGAGGGATCAGTGCAT	6	precursor.B.cell
10X_P7_2_TGAGGGATCCAAGTAC	20	segmented.neutrophil.of.bone.marrow
10X_P7_2_TGATTTCAGGCTAGGT	19	band.form.neutrophil
10X_P7_2_TGATTTCTCAGTTGAC	19	band.form.neutrophil
10X_P7_2_TGATTTCTCGTGGGAA	19	band.form.neutrophil
10X_P7_2_TGCACCTAGAGGTAGA	9	myelocyte
10X_P7_2_TGCACCTTCAGTTGAC	18	neutrophilic.metamyelocyte
10X_P7_2_TGCACCTTCGACCAGC	19	band.form.neutrophil
10X_P7_2_TGCCAAAAGCAGACTG	9	myelocyte
10X_P7_2_TGCCAAACACCTTGTC	11	macrophage
10X_P7_2_TGCCAAACAGCGTTCG	11	macrophage
10X_P7_2_TGCCAAACATGAACCT	8	basophil
10X_P7_2_TGCCAAAGTACAGACG	18	neutrophilic.metamyelocyte
10X_P7_2_TGCCAAAGTGCCTTGG	14	monocyte
10X_P7_2_TGCCAAAGTTGATTCG	17	neutrophilic.myeloblast
10X_P7_2_TGCCAAAGTTGCTCCT	18	neutrophilic.metamyelocyte
10X_P7_2_TGCCCATAGACAAGCC	11	macrophage
10X_P7_2_TGCCCATAGAGTCTGG	19	band.form.neutrophil
10X_P7_2_TGCCCATCAATGCCAT	14	monocyte
10X_P7_2_TGCCCATCAGTATAAG	19	band.form.neutrophil
10X_P7_2_TGCCCATTCTGGCGAC	18	neutrophilic.metamyelocyte
10X_P7_2_TGCCCATTCTTGTTTG	9	myelocyte
10X_P7_2_TGCCCTAAGAAACGAG	10	hematopoietic.stem.cell
10X_P7_2_TGCGCAGAGGAACTGC	5	early.pro.B.cell
10X_P7_2_TGCGCAGCAAGAAGAG	10	hematopoietic.stem.cell
10X_P7_2_TGCGGGTAGTCTTGCA	16	promyelocyte
10X_P7_2_TGCGGGTTCCTATGTT	15	conventional.dendritic.cell
10X_P7_2_TGCGGGTTCGAGCCCA	13	mature.B.cell
10X_P7_2_TGCGGGTTCTCTGCTG	20	segmented.neutrophil.of.bone.marrow
10X_P7_2_TGCGTGGCATCGATTG	19	band.form.neutrophil
10X_P7_2_TGCGTGGTCGGAGCAA	12	T.cell
10X_P7_2_TGCTACCAGTTCGCAT	19	band.form.neutrophil
10X_P7_2_TGCTACCCATTCGACA	18	neutrophilic.metamyelocyte
10X_P7_2_TGCTACCGTGGTTTCA	12	T.cell
10X_P7_2_TGCTGCTGTCTAAAGA	14	monocyte
10X_P7_2_TGCTGCTGTGCGAAAC	9	myelocyte
10X_P7_2_TGCTGCTTCAACACCA	19	band.form.neutrophil
10X_P7_2_TGGACGCAGCCGTCGT	9	myelocyte
10X_P7_2_TGGACGCCAAACCTAC	1	proerythroblast
10X_P7_2_TGGACGCGTTTCGCTC	9	myelocyte
10X_P7_2_TGGACGCTCCAGATCA	13	mature.B.cell
10X_P7_2_TGGCCAGAGCCAGGAT	6	precursor.B.cell
10X_P7_2_TGGCCAGCAGAGTGTG	14	monocyte
10X_P7_2_TGGCCAGCATGCAACT	16	promyelocyte
10X_P7_2_TGGCCAGTCTGCCCTA	14	monocyte
10X_P7_2_TGGCGCAAGATGCCTT	3	erythroblast
10X_P7_2_TGGCGCAAGCCCTAAT	7	immature.B.cell
10X_P7_2_TGGCGCAAGGGAGTAA	2	reticulocyte
10X_P7_2_TGGCGCAAGTCACGCC	19	band.form.neutrophil
10X_P7_2_TGGCGCACATCTCGCT	7	immature.B.cell
10X_P7_2_TGGCGCAGTACGACCC	19	band.form.neutrophil
10X_P7_2_TGGCGCAGTGGTCCGT	2	reticulocyte
10X_P7_2_TGGCTGGAGGGTGTGT	11	macrophage
10X_P7_2_TGGCTGGTCCACGAAT	19	band.form.neutrophil
10X_P7_2_TGGCTGGTCCGGCACA	7	immature.B.cell
10X_P7_2_TGGCTGGTCGCTTGTC	19	band.form.neutrophil
10X_P7_2_TGGGAAGCAAGAAAGG	12	T.cell
10X_P7_2_TGGGAAGCACGCTTTC	9	myelocyte
10X_P7_2_TGGGAAGGTAGCTGCC	5	early.pro.B.cell
10X_P7_2_TGGGAAGTCGAATGGG	14	monocyte
10X_P7_2_TGGGCGTAGGCACATG	3	erythroblast
10X_P7_2_TGGGCGTAGTGGAGAA	19	band.form.neutrophil
10X_P7_2_TGGGCGTGTCAAAGAT	1	proerythroblast
10X_P7_2_TGGTTAGCACAGATTC	9	myelocyte
10X_P7_2_TGGTTAGGTACCGCTG	20	segmented.neutrophil.of.bone.marrow
10X_P7_2_TGGTTAGGTCGGATCC	10	hematopoietic.stem.cell
10X_P7_2_TGGTTAGGTGTGCCTG	5	early.pro.B.cell
10X_P7_2_TGGTTAGGTTAAGTAG	18	neutrophilic.metamyelocyte
10X_P7_2_TGGTTCCTCCCTGACT	1	proerythroblast
10X_P7_2_TGGTTCCTCGAACTGT	9	myelocyte
10X_P7_2_TGGTTCCTCTTTACGT	18	neutrophilic.metamyelocyte
10X_P7_2_TGTATTCAGCTCTCGG	18	neutrophilic.metamyelocyte
10X_P7_2_TGTATTCCAAAGGCGT	16	promyelocyte
10X_P7_2_TGTATTCTCTACTTAC	1	proerythroblast
10X_P7_2_TGTCCCAAGGAATTAC	14	monocyte
10X_P7_2_TGTCCCACACCTATCC	3	erythroblast
10X_P7_2_TGTCCCACAGGATCGA	15	conventional.dendritic.cell
10X_P7_2_TGTCCCAGTCGAATCT	14	monocyte
10X_P7_2_TGTCCCATCAGAGACG	7	immature.B.cell
10X_P7_2_TGTCCCATCCTCATTA	20	segmented.neutrophil.of.bone.marrow
10X_P7_2_TGTGGTAAGAAAGTGG	16	promyelocyte
10X_P7_2_TGTGGTAAGCTAGTGG	16	promyelocyte
10X_P7_2_TGTGGTAAGTGGTCCC	18	neutrophilic.metamyelocyte
10X_P7_2_TGTGGTATCCAACCAA	19	band.form.neutrophil
10X_P7_2_TGTGGTATCCCATTAT	5	early.pro.B.cell
10X_P7_2_TGTGTTTCATGTAGTC	7	immature.B.cell
10X_P7_2_TGTGTTTTCAGCCTAA	18	neutrophilic.metamyelocyte
10X_P7_2_TGTGTTTTCCAAGCCG	9	myelocyte
10X_P7_2_TGTGTTTTCTGCCAGG	19	band.form.neutrophil
10X_P7_2_TGTTCCGCATGTAGTC	16	promyelocyte
10X_P7_2_TGTTCCGTCGCAGGCT	14	monocyte
10X_P7_2_TGTTCCGTCTTGACGA	14	monocyte
10X_P7_2_TTAACTCCACATTCGA	9	myelocyte
10X_P7_2_TTAACTCGTGAGGCTA	14	monocyte
10X_P7_2_TTAACTCGTTAGAACA	15	conventional.dendritic.cell
10X_P7_2_TTAGGACAGGTAGCTG	14	monocyte
10X_P7_2_TTAGGACCACATGGGA	17	neutrophilic.myeloblast
10X_P7_2_TTAGGACTCCTTGGTC	8	basophil
10X_P7_2_TTAGGCAAGACTGGGT	8	basophil
10X_P7_2_TTAGGCACATGCATGT	19	band.form.neutrophil
10X_P7_2_TTAGTTCAGCTGCAAG	2	reticulocyte
10X_P7_2_TTAGTTCTCCCTAATT	20	segmented.neutrophil.of.bone.marrow
10X_P7_2_TTAGTTCTCGGCGGTT	10	hematopoietic.stem.cell
10X_P7_2_TTAGTTCTCTTTCCTC	15	conventional.dendritic.cell
10X_P7_2_TTATGCTAGAAACGCC	9	myelocyte
10X_P7_2_TTATGCTGTGTTCTTT	12	T.cell
10X_P7_2_TTATGCTGTTTGACAC	12	T.cell
10X_P7_2_TTATGCTTCCCTCAGT	18	neutrophilic.metamyelocyte
10X_P7_2_TTCCCAGAGGCTCAGA	19	band.form.neutrophil
10X_P7_2_TTCCCAGCAACTGCGC	14	monocyte
10X_P7_2_TTCCCAGCACATGACT	6	precursor.B.cell
10X_P7_2_TTCCCAGTCCGCAGTG	19	band.form.neutrophil
10X_P7_2_TTCGAAGAGCAGATCG	19	band.form.neutrophil
10X_P7_2_TTCGAAGTCGTTTATC	20	segmented.neutrophil.of.bone.marrow
10X_P7_2_TTCGGTCAGAGTGACC	10	hematopoietic.stem.cell
10X_P7_2_TTCGGTCGTAAGTAGT	15	conventional.dendritic.cell
10X_P7_2_TTCGGTCTCACCGTAA	13	mature.B.cell
10X_P7_2_TTCGGTCTCCAAACTG	19	band.form.neutrophil
10X_P7_2_TTCGGTCTCTGTTGAG	7	immature.B.cell
10X_P7_2_TTCTACACAACTTGAC	14	monocyte
10X_P7_2_TTCTACATCAACGCTA	3	erythroblast
10X_P7_2_TTCTCAAAGAAGAAGC	2	reticulocyte
10X_P7_2_TTCTCAAAGTCTCAAC	18	neutrophilic.metamyelocyte
10X_P7_2_TTCTCAACAGTGACAG	14	monocyte
10X_P7_2_TTCTCAAGTCTTGATG	14	monocyte
10X_P7_2_TTCTCAATCTCGGACG	11	macrophage
10X_P7_2_TTCTCCTAGCTAGTCT	16	promyelocyte
10X_P7_2_TTCTTAGCACATCCGG	13	mature.B.cell
10X_P7_2_TTCTTAGGTGTAACGG	9	myelocyte
10X_P7_2_TTCTTAGTCTGGTTCC	19	band.form.neutrophil
10X_P7_2_TTGAACGCACGTGAGA	14	monocyte
10X_P7_2_TTGAACGCATCTATGG	18	neutrophilic.metamyelocyte
10X_P7_2_TTGAACGTCTACTCAT	18	neutrophilic.metamyelocyte
10X_P7_2_TTGACTTAGAAACCTA	20	segmented.neutrophil.of.bone.marrow
10X_P7_2_TTGACTTAGGCAAAGA	19	band.form.neutrophil
10X_P7_2_TTGACTTCAAGTAGTA	6	precursor.B.cell
10X_P7_2_TTGACTTCATCTCGCT	15	conventional.dendritic.cell
10X_P7_2_TTGACTTGTGTGACCC	19	band.form.neutrophil
10X_P7_2_TTGCCGTAGAAGATTC	12	T.cell
10X_P7_2_TTGCGTCGTCGCCATG	14	monocyte
10X_P7_2_TTGGAACAGGTGCAAC	19	band.form.neutrophil
10X_P7_2_TTGGAACAGGTGCTAG	16	promyelocyte
10X_P7_2_TTGGAACCACAGACTT	18	neutrophilic.metamyelocyte
10X_P7_2_TTGGAACTCGCGTTTC	14	monocyte
10X_P7_2_TTGGCAAAGTTCGATC	14	monocyte
10X_P7_2_TTGGCAACAAGTAATG	18	neutrophilic.metamyelocyte
10X_P7_2_TTGGCAACACGCATCG	9	myelocyte
10X_P7_2_TTGGCAACATGTCGAT	14	monocyte
10X_P7_2_TTGTAGGAGCTGGAAC	1	proerythroblast
10X_P7_2_TTGTAGGGTCAGGACA	14	monocyte
10X_P7_2_TTGTAGGGTGATGTGG	2	reticulocyte
10X_P7_2_TTTACTGAGACAAGCC	18	neutrophilic.metamyelocyte
10X_P7_2_TTTACTGAGACATAAC	14	monocyte
10X_P7_2_TTTACTGAGTTGAGAT	18	neutrophilic.metamyelocyte
10X_P7_2_TTTACTGCACACCGAC	18	neutrophilic.metamyelocyte
10X_P7_2_TTTACTGCATCCCACT	14	monocyte
10X_P7_2_TTTACTGGTAAATACG	18	neutrophilic.metamyelocyte
10X_P7_2_TTTACTGGTCTCCCTA	17	neutrophilic.myeloblast
10X_P7_2_TTTACTGTCCAAATGC	18	neutrophilic.metamyelocyte
10X_P7_2_TTTATGCAGCTGCGAA	19	band.form.neutrophil
10X_P7_2_TTTATGCTCAACGGCC	19	band.form.neutrophil
10X_P7_2_TTTATGCTCCACGAAT	11	macrophage
10X_P7_2_TTTCCTCAGCCCAGCT	18	neutrophilic.metamyelocyte
10X_P7_2_TTTCCTCAGCGCTCCA	16	promyelocyte
10X_P7_2_TTTCCTCCACAACTGT	18	neutrophilic.metamyelocyte
10X_P7_2_TTTCCTCCACCCATTC	5	early.pro.B.cell
10X_P7_2_TTTGCGCAGTGACATA	17	neutrophilic.myeloblast
10X_P7_2_TTTGGTTCATCCGTGG	19	band.form.neutrophil
10X_P7_2_TTTGGTTGTCAGGACA	18	neutrophilic.metamyelocyte
10X_P7_2_TTTGGTTTCCCAGGTG	19	band.form.neutrophil
10X_P7_2_TTTGGTTTCCGTACAA	18	neutrophilic.metamyelocyte
10X_P7_2_TTTGTCAAGGGCACTA	12	T.cell
10X_P7_2_TTTGTCAAGGTTACCT	5	early.pro.B.cell
10X_P7_2_TTTGTCATCGAATCCA	6	precursor.B.cell
10X_P7_3_AAACCTGAGCATCATC	15	conventional.dendritic.cell
10X_P7_3_AAACCTGCAGAGTGTG	14	monocyte
10X_P7_3_AAACCTGGTCGAACAG	16	promyelocyte
10X_P7_3_AAACCTGTCACTTCAT	9	myelocyte
10X_P7_3_AAACGGGAGAAGGTTT	19	band.form.neutrophil
10X_P7_3_AAACGGGAGTAGTGCG	14	monocyte
10X_P7_3_AAACGGGCACGACTCG	18	neutrophilic.metamyelocyte
10X_P7_3_AAACGGGGTAGCACGA	14	monocyte
10X_P7_3_AAAGATGCACTCGACG	7	immature.B.cell
10X_P7_3_AAAGATGCATGGATGG	18	neutrophilic.metamyelocyte
10X_P7_3_AAAGATGGTGTGCGTC	1	proerythroblast
10X_P7_3_AAAGATGTCAGCTCGG	14	monocyte
10X_P7_3_AAAGATGTCCTATGTT	3	erythroblast
10X_P7_3_AAAGCAAAGAGCCTAG	3	erythroblast
10X_P7_3_AAAGCAACAGACGCAA	19	band.form.neutrophil
10X_P7_3_AAAGCAACATTCGACA	9	myelocyte
10X_P7_3_AAAGCAAGTACAAGTA	2	reticulocyte
10X_P7_3_AAAGCAAGTGAGTGAC	7	immature.B.cell
10X_P7_3_AAAGTAGAGTGGAGTC	11	macrophage
10X_P7_3_AAAGTAGGTTGCTCCT	5	early.pro.B.cell
10X_P7_3_AAATGCCCAAGCTGTT	18	neutrophilic.metamyelocyte
10X_P7_3_AAATGCCGTCAGAGGT	18	neutrophilic.metamyelocyte
10X_P7_3_AACACGTAGGGTTCCC	12	T.cell
10X_P7_3_AACACGTAGTAGATGT	2	reticulocyte
10X_P7_3_AACACGTGTCCTCCAT	7	immature.B.cell
10X_P7_3_AACACGTTCTATCGCC	9	myelocyte
10X_P7_3_AACCATGAGTCCAGGA	7	immature.B.cell
10X_P7_3_AACCGCGAGAAGAAGC	11	macrophage
10X_P7_3_AACCGCGCAGCCTATA	11	macrophage
10X_P7_3_AACGTTGCATGCCACG	19	band.form.neutrophil
10X_P7_3_AACTCAGAGAATGTGT	7	immature.B.cell
10X_P7_3_AACTCAGAGACGCTTT	3	erythroblast
10X_P7_3_AACTCAGAGGACATTA	18	neutrophilic.metamyelocyte
10X_P7_3_AACTCAGAGGTGTGGT	15	conventional.dendritic.cell
10X_P7_3_AACTCAGCATTGGCGC	19	band.form.neutrophil
10X_P7_3_AACTCAGGTACACCGC	18	neutrophilic.metamyelocyte
10X_P7_3_AACTCAGGTATTACCG	1	proerythroblast
10X_P7_3_AACTCAGTCAACGCTA	19	band.form.neutrophil
10X_P7_3_AACTCAGTCATGTAGC	2	reticulocyte
10X_P7_3_AACTCCCAGTAGCCGA	6	precursor.B.cell
10X_P7_3_AACTCCCCACACTGCG	16	promyelocyte
10X_P7_3_AACTCCCCAGTAGAGC	11	macrophage
10X_P7_3_AACTCCCCATAAGACA	10	hematopoietic.stem.cell
10X_P7_3_AACTCTTCATCCTTGC	8	basophil
10X_P7_3_AACTCTTCATCTACGA	19	band.form.neutrophil
10X_P7_3_AACTCTTGTGTGACCC	5	early.pro.B.cell
10X_P7_3_AACTGGTTCAAGGTAA	14	monocyte
10X_P7_3_AACTTTCAGAGTCTGG	10	hematopoietic.stem.cell
10X_P7_3_AACTTTCAGTGGAGAA	14	monocyte
10X_P7_3_AACTTTCCAATAGCGG	7	immature.B.cell
10X_P7_3_AACTTTCCACTTAAGC	19	band.form.neutrophil
10X_P7_3_AACTTTCTCCGAAGAG	15	conventional.dendritic.cell
10X_P7_3_AACTTTCTCTTCAACT	19	band.form.neutrophil
10X_P7_3_AAGACCTAGCGAGAAA	19	band.form.neutrophil
10X_P7_3_AAGACCTAGGCTAGCA	20	segmented.neutrophil.of.bone.marrow
10X_P7_3_AAGACCTCACCGAATT	1	proerythroblast
10X_P7_3_AAGACCTGTACCATCA	6	precursor.B.cell
10X_P7_3_AAGACCTGTCAGAGGT	1	proerythroblast
10X_P7_3_AAGACCTGTCCGAAGA	20	segmented.neutrophil.of.bone.marrow
10X_P7_3_AAGCCGCAGCAGCGTA	14	monocyte
10X_P7_3_AAGCCGCTCAACCAAC	11	macrophage
10X_P7_3_AAGCCGCTCATGTCCC	1	proerythroblast
10X_P7_3_AAGCCGCTCCTAGTGA	20	segmented.neutrophil.of.bone.marrow
10X_P7_3_AAGGAGCAGTGATCGG	13	mature.B.cell
10X_P7_3_AAGGAGCCATTGGCGC	3	erythroblast
10X_P7_3_AAGGAGCTCACCATAG	11	macrophage
10X_P7_3_AAGGCAGCAAAGGAAG	20	segmented.neutrophil.of.bone.marrow
10X_P7_3_AAGGTTCAGGGATACC	16	promyelocyte
10X_P7_3_AAGGTTCAGTACATGA	14	monocyte
10X_P7_3_AAGGTTCAGTCAAGCG	16	promyelocyte
10X_P7_3_AAGGTTCTCGCCGTGA	2	reticulocyte
10X_P7_3_AAGGTTCTCTTGTATC	19	band.form.neutrophil
10X_P7_3_AAGTCTGCATCGTCGG	10	hematopoietic.stem.cell
10X_P7_3_AAGTCTGCATGGAATA	19	band.form.neutrophil
10X_P7_3_AAGTCTGGTAGTGAAT	19	band.form.neutrophil
10X_P7_3_AAGTCTGTCAGGTTCA	11	macrophage
10X_P7_3_AAGTCTGTCATAAAGG	19	band.form.neutrophil
10X_P7_3_AATCCAGAGATGTTAG	18	neutrophilic.metamyelocyte
10X_P7_3_AATCCAGCATTCTCAT	15	conventional.dendritic.cell
10X_P7_3_AATCCAGGTCCGTTAA	18	neutrophilic.metamyelocyte
10X_P7_3_AATCCAGTCTCATTCA	8	basophil
10X_P7_3_AATCGGTAGGATATAC	13	mature.B.cell
10X_P7_3_AATCGGTCATGCCTTC	3	erythroblast
10X_P7_3_AATCGGTGTATTACCG	18	neutrophilic.metamyelocyte
10X_P7_3_ACACCAAAGGGAAACA	18	neutrophilic.metamyelocyte
10X_P7_3_ACACCAACAAGCCGCT	2	reticulocyte
10X_P7_3_ACACCAACAATCACAC	11	macrophage
10X_P7_3_ACACCAACATCGATGT	18	neutrophilic.metamyelocyte
10X_P7_3_ACACCAAGTCAACATC	14	monocyte
10X_P7_3_ACACCAAGTTGAGTTC	20	segmented.neutrophil.of.bone.marrow
10X_P7_3_ACACCCTAGAGCAATT	14	monocyte
10X_P7_3_ACACCCTAGTGGGTTG	1	proerythroblast
10X_P7_3_ACACCCTCACCTTGTC	10	hematopoietic.stem.cell
10X_P7_3_ACACCGGGTACAAGTA	19	band.form.neutrophil
10X_P7_3_ACACCGGGTCATGCCG	11	macrophage
10X_P7_3_ACACCGGGTCCATGAT	1	proerythroblast
10X_P7_3_ACACCGGTCCGTAGGC	5	early.pro.B.cell
10X_P7_3_ACACTGAAGGTGCAAC	9	myelocyte
10X_P7_3_ACACTGAGTACCGTTA	14	monocyte
10X_P7_3_ACACTGATCCCATTTA	19	band.form.neutrophil
10X_P7_3_ACAGCCGAGCGTAGTG	1	proerythroblast
10X_P7_3_ACAGCTAAGATCGGGT	19	band.form.neutrophil
10X_P7_3_ACAGCTACATCACCCT	14	monocyte
10X_P7_3_ACATACGAGCCGTCGT	9	myelocyte
10X_P7_3_ACATACGAGTTGTCGT	19	band.form.neutrophil
10X_P7_3_ACATACGCACAGACTT	20	segmented.neutrophil.of.bone.marrow
10X_P7_3_ACATACGTCTCTTGAT	1	proerythroblast
10X_P7_3_ACATACGTCTGGTGTA	12	T.cell
10X_P7_3_ACATCAGAGAGGGATA	11	macrophage
10X_P7_3_ACATCAGAGTGGAGTC	20	segmented.neutrophil.of.bone.marrow
10X_P7_3_ACATCAGGTGGACGAT	19	band.form.neutrophil
10X_P7_3_ACATGGTAGATAGTCA	17	neutrophilic.myeloblast
10X_P7_3_ACATGGTAGATGTGGC	19	band.form.neutrophil
10X_P7_3_ACATGGTGTGCAACGA	13	mature.B.cell
10X_P7_3_ACATGGTTCTGCTTGC	19	band.form.neutrophil
10X_P7_3_ACCAGTACAGTTAACC	11	macrophage
10X_P7_3_ACCAGTACATGTTGAC	14	monocyte
10X_P7_3_ACCAGTAGTCCGTGAC	2	reticulocyte
10X_P7_3_ACCAGTATCAACCAAC	10	hematopoietic.stem.cell
10X_P7_3_ACCAGTATCCAACCAA	2	reticulocyte
10X_P7_3_ACCAGTATCTCAAACG	11	macrophage
10X_P7_3_ACCAGTATCTTCCTTC	18	neutrophilic.metamyelocyte
10X_P7_3_ACCCACTCACGTCTCT	12	T.cell
10X_P7_3_ACCCACTCAGGTGCCT	20	segmented.neutrophil.of.bone.marrow
10X_P7_3_ACCCACTCATTCACTT	19	band.form.neutrophil
10X_P7_3_ACCCACTGTCAAAGAT	9	myelocyte
10X_P7_3_ACCCACTGTCTAGTCA	19	band.form.neutrophil
10X_P7_3_ACCCACTTCGCTGATA	16	promyelocyte
10X_P7_3_ACCGTAAGTAGAAGGA	7	immature.B.cell
10X_P7_3_ACCGTAATCATCTGCC	12	T.cell
10X_P7_3_ACCTTTACAATAACGA	3	erythroblast
10X_P7_3_ACCTTTACAGCATGAG	16	promyelocyte
10X_P7_3_ACCTTTAGTGGACGAT	2	reticulocyte
10X_P7_3_ACCTTTATCACAAACC	7	immature.B.cell
10X_P7_3_ACGAGCCCAACACGCC	1	proerythroblast
10X_P7_3_ACGAGCCCAGGGCATA	1	proerythroblast
10X_P7_3_ACGAGCCTCACTGGGC	7	immature.B.cell
10X_P7_3_ACGAGCCTCCCATTAT	19	band.form.neutrophil
10X_P7_3_ACGAGCCTCGGCGCTA	16	promyelocyte
10X_P7_3_ACGAGGAAGCTGCAAG	18	neutrophilic.metamyelocyte
10X_P7_3_ACGAGGACAGACGCAA	14	monocyte
10X_P7_3_ACGAGGAGTGATGCCC	10	hematopoietic.stem.cell
10X_P7_3_ACGAGGATCGAACTGT	10	hematopoietic.stem.cell
10X_P7_3_ACGATACCATACGCCG	14	monocyte
10X_P7_3_ACGATACTCGACAGCC	14	monocyte
10X_P7_3_ACGATACTCTATCCTA	13	mature.B.cell
10X_P7_3_ACGATGTTCAGTTTGG	18	neutrophilic.metamyelocyte
10X_P7_3_ACGCAGCCATGGTCTA	16	promyelocyte
10X_P7_3_ACGCAGCGTTGGTTTG	10	hematopoietic.stem.cell
10X_P7_3_ACGCAGCTCTTCCTTC	19	band.form.neutrophil
10X_P7_3_ACGCCAGAGGAGTTGC	19	band.form.neutrophil
10X_P7_3_ACGCCAGCAAAGGAAG	16	promyelocyte
10X_P7_3_ACGCCAGCAGACGCAA	17	neutrophilic.myeloblast
10X_P7_3_ACGCCGAGTAGCGTAG	16	promyelocyte
10X_P7_3_ACGCCGAGTCATTAGC	16	promyelocyte
10X_P7_3_ACGCCGATCGAGCCCA	16	promyelocyte
10X_P7_3_ACGGAGAAGGATATAC	7	immature.B.cell
10X_P7_3_ACGGAGACACCATGTA	9	myelocyte
10X_P7_3_ACGGAGACAGGCGATA	16	promyelocyte
10X_P7_3_ACGGAGAGTTCAGCGC	3	erythroblast
10X_P7_3_ACGGAGAGTTCCGTCT	20	segmented.neutrophil.of.bone.marrow
10X_P7_3_ACGGCCAAGAGTTGGC	19	band.form.neutrophil
10X_P7_3_ACGGCCAAGTCACGCC	17	neutrophilic.myeloblast
10X_P7_3_ACGGCCAGTCTCCACT	14	monocyte
10X_P7_3_ACGGCCAGTTCCGTCT	18	neutrophilic.metamyelocyte
10X_P7_3_ACGGCCAGTTCGGCAC	20	segmented.neutrophil.of.bone.marrow
10X_P7_3_ACGGCCATCAACGAAA	19	band.form.neutrophil
10X_P7_3_ACGGCCATCCTGCTTG	1	proerythroblast
10X_P7_3_ACGGCCATCTTGCAAG	17	neutrophilic.myeloblast
10X_P7_3_ACGGGCTAGCGTTCCG	20	segmented.neutrophil.of.bone.marrow
10X_P7_3_ACGGGCTAGTGGGATC	18	neutrophilic.metamyelocyte
10X_P7_3_ACGGGCTCAATCCAAC	2	reticulocyte
10X_P7_3_ACGGGCTGTAAGAGAG	1	proerythroblast
10X_P7_3_ACGGGCTGTCGTCTTC	9	myelocyte
10X_P7_3_ACGGGCTTCAAGGTAA	13	mature.B.cell
10X_P7_3_ACGGGCTTCCGCGGTA	6	precursor.B.cell
10X_P7_3_ACGGGCTTCGCCTGAG	1	proerythroblast
10X_P7_3_ACGGGCTTCGGCGCAT	14	monocyte
10X_P7_3_ACGGGCTTCTCAAACG	9	myelocyte
10X_P7_3_ACGGGTCAGAGGTTAT	18	neutrophilic.metamyelocyte
10X_P7_3_ACGGGTCCAAAGGTGC	5	early.pro.B.cell
10X_P7_3_ACGGGTCCATTCCTGC	19	band.form.neutrophil
10X_P7_3_ACGGGTCGTGACGCCT	12	T.cell
10X_P7_3_ACGGGTCGTTAAGATG	4	plasma.cell
10X_P7_3_ACGGGTCTCCCTAATT	6	precursor.B.cell
10X_P7_3_ACGTCAAAGGGTGTTG	1	proerythroblast
10X_P7_3_ACGTCAACAAATACAG	18	neutrophilic.metamyelocyte
10X_P7_3_ACGTCAACACAAGTAA	11	macrophage
10X_P7_3_ACGTCAAGTATCACCA	6	precursor.B.cell
10X_P7_3_ACGTCAATCTCCAACC	8	basophil
10X_P7_3_ACTATCTAGGGTCTCC	18	neutrophilic.metamyelocyte
10X_P7_3_ACTATCTCAATAGAGT	9	myelocyte
10X_P7_3_ACTATCTGTAAGTGTA	5	early.pro.B.cell
10X_P7_3_ACTATCTGTGGCAAAC	12	T.cell
10X_P7_3_ACTATCTTCTTGTCAT	18	neutrophilic.metamyelocyte
10X_P7_3_ACTGAACGTTGGGACA	18	neutrophilic.metamyelocyte
10X_P7_3_ACTGAGTCAGCTATTG	16	promyelocyte
10X_P7_3_ACTGAGTGTATATCCG	19	band.form.neutrophil
10X_P7_3_ACTGAGTGTCACCCAG	1	proerythroblast
10X_P7_3_ACTGAGTGTGAGGGTT	8	basophil
10X_P7_3_ACTGAGTTCATGCTCC	2	reticulocyte
10X_P7_3_ACTGATGGTACCCAAT	18	neutrophilic.metamyelocyte
10X_P7_3_ACTGATGTCAACACGT	7	immature.B.cell
10X_P7_3_ACTGATGTCGGAATCT	18	neutrophilic.metamyelocyte
10X_P7_3_ACTGCTCAGCCACGTC	12	T.cell
10X_P7_3_ACTGCTCAGCTGCGAA	10	hematopoietic.stem.cell
10X_P7_3_ACTGCTCAGGACGAAA	10	hematopoietic.stem.cell
10X_P7_3_ACTGTCCGTAGCTAAA	8	basophil
10X_P7_3_ACTGTCCGTTAGGGTG	10	hematopoietic.stem.cell
10X_P7_3_ACTTACTAGACTCGGA	13	mature.B.cell
10X_P7_3_ACTTACTAGCTAGTGG	16	promyelocyte
10X_P7_3_ACTTACTAGTAGCGGT	1	proerythroblast
10X_P7_3_ACTTACTCACCTATCC	14	monocyte
10X_P7_3_ACTTACTGTAAGTGGC	19	band.form.neutrophil
10X_P7_3_ACTTACTGTTGTTTGG	3	erythroblast
10X_P7_3_ACTTACTTCCAAGTAC	18	neutrophilic.metamyelocyte
10X_P7_3_ACTTGTTAGAGCTATA	11	macrophage
10X_P7_3_ACTTGTTCAGGGTACA	2	reticulocyte
10X_P7_3_ACTTTCACAATAAGCA	1	proerythroblast
10X_P7_3_ACTTTCAGTGCGGTAA	7	immature.B.cell
10X_P7_3_ACTTTCATCGGACAAG	13	mature.B.cell
10X_P7_3_ACTTTCATCTGCCCTA	1	proerythroblast
10X_P7_3_AGAATAGCAGGCTCAC	20	segmented.neutrophil.of.bone.marrow
10X_P7_3_AGAATAGCAGGGAGAG	17	neutrophilic.myeloblast
10X_P7_3_AGAATAGTCAGAGCTT	10	hematopoietic.stem.cell
10X_P7_3_AGACGTTAGTCTCGGC	18	neutrophilic.metamyelocyte
10X_P7_3_AGACGTTCAGTCGTGC	12	T.cell
10X_P7_3_AGACGTTTCCGATATG	18	neutrophilic.metamyelocyte
10X_P7_3_AGAGCGAAGCTAAACA	14	monocyte
10X_P7_3_AGAGCGAAGGGTATCG	19	band.form.neutrophil
10X_P7_3_AGAGCGACAGATAATG	20	segmented.neutrophil.of.bone.marrow
10X_P7_3_AGAGCGAGTGATGCCC	4	plasma.cell
10X_P7_3_AGAGCGAGTTACGCGC	16	promyelocyte
10X_P7_3_AGAGCGAGTTTGACAC	13	mature.B.cell
10X_P7_3_AGAGCGATCAGTTTGG	18	neutrophilic.metamyelocyte
10X_P7_3_AGAGCTTGTTCAACCA	16	promyelocyte
10X_P7_3_AGAGCTTGTTGTTTGG	19	band.form.neutrophil
10X_P7_3_AGAGCTTTCAAGAAGT	14	monocyte
10X_P7_3_AGAGTGGAGAACTCGG	14	monocyte
10X_P7_3_AGAGTGGCAAACTGCT	19	band.form.neutrophil
10X_P7_3_AGAGTGGCACCACCAG	16	promyelocyte
10X_P7_3_AGAGTGGCAGTACACT	18	neutrophilic.metamyelocyte
10X_P7_3_AGAGTGGCATCTATGG	16	promyelocyte
10X_P7_3_AGAGTGGCATGAAGTA	1	proerythroblast
10X_P7_3_AGAGTGGGTGCGAAAC	18	neutrophilic.metamyelocyte
10X_P7_3_AGAGTGGGTGTCCTCT	15	conventional.dendritic.cell
10X_P7_3_AGAGTGGTCGCATGGC	16	promyelocyte
10X_P7_3_AGATCTGAGCGTTGCC	5	early.pro.B.cell
10X_P7_3_AGATCTGCACTGAAGG	11	macrophage
10X_P7_3_AGATCTGGTTATCGGT	14	monocyte
10X_P7_3_AGATCTGGTTTAGGAA	1	proerythroblast
10X_P7_3_AGATTGCAGCCCAATT	2	reticulocyte
10X_P7_3_AGATTGCAGTCCTCCT	6	precursor.B.cell
10X_P7_3_AGATTGCCAATCGGTT	18	neutrophilic.metamyelocyte
10X_P7_3_AGATTGCTCCTTTACA	1	proerythroblast
10X_P7_3_AGATTGCTCGTCTGCT	14	monocyte
10X_P7_3_AGATTGCTCTTCGAGA	8	basophil
10X_P7_3_AGCAGCCCAACAACCT	13	mature.B.cell
10X_P7_3_AGCAGCCCACAGCCCA	7	immature.B.cell
10X_P7_3_AGCAGCCCACCGAAAG	15	conventional.dendritic.cell
10X_P7_3_AGCAGCCTCCTAGAAC	5	early.pro.B.cell
10X_P7_3_AGCAGCCTCGCGTTTC	18	neutrophilic.metamyelocyte
10X_P7_3_AGCATACCAAAGTCAA	16	promyelocyte
10X_P7_3_AGCATACCAAGCCGTC	20	segmented.neutrophil.of.bone.marrow
10X_P7_3_AGCATACCATTAACCG	18	neutrophilic.metamyelocyte
10X_P7_3_AGCATACTCAGCGACC	14	monocyte
[truncated: 1,654 more rows]

## Sheet: Lung
Supplementary File 4C. Mouse cell clusters annotations in lung.
Cell index	Cluster no.	Cell Ontology term
10X_P7_8_AAACGGGAGGATATAC	9	classical.monocyte
10X_P7_8_AAACGGGTCTCGTATT	8	alveolar.macrophage
10X_P7_8_AAAGATGCAGATCTGT	6	B.cell
10X_P7_8_AAATGCCAGATAGTCA	11	lymphocyte
10X_P7_8_AAATGCCCAAACTGCT	11	lymphocyte
10X_P7_8_AAATGCCGTGAACCTT	8	alveolar.macrophage
10X_P7_8_AACACGTAGTGTACCT	4	capillary.endothelial.cell
10X_P7_8_AACACGTGTGGCTCCA	3	pulmonary.artery.endothelial.cell
10X_P7_8_AACCATGAGTTGTCGT	8	alveolar.macrophage
10X_P7_8_AACCATGCACGTCAGC	13	fibroblast
10X_P7_8_AACCATGGTAATAGCA	3	pulmonary.artery.endothelial.cell
10X_P7_8_AACCATGTCTGTTGAG	9	classical.monocyte
10X_P7_8_AACCGCGGTTACGGAG	11	lymphocyte
10X_P7_8_AACCGCGTCCTTGCCA	8	alveolar.macrophage
10X_P7_8_AACGTTGGTAGCTCCG	10	non.classical.monocyte
10X_P7_8_AACGTTGTCAACACAC	14	fibroblast.1
10X_P7_8_AACTCAGCATTTCACT	8	alveolar.macrophage
10X_P7_8_AACTCCCTCTTATCTG	3	pulmonary.artery.endothelial.cell
10X_P7_8_AACTCTTGTTCCAACA	8	alveolar.macrophage
10X_P7_8_AACTCTTTCTTGTTTG	4	capillary.endothelial.cell
10X_P7_8_AACTGGTGTTCAGTAC	7	neutrophil
10X_P7_8_AACTTTCAGAGCTGCA	8	alveolar.macrophage
10X_P7_8_AAGCCGCTCAGTTCGA	8	alveolar.macrophage
10X_P7_8_AAGGAGCCACTAGTAC	10	non.classical.monocyte
10X_P7_8_AAGGAGCCAGGAATCG	8	alveolar.macrophage
10X_P7_8_AAGGCAGTCTGCTTGC	11	lymphocyte
10X_P7_8_AAGGTTCTCAATCACG	3	pulmonary.artery.endothelial.cell
10X_P7_8_AATCCAGGTACCGGCT	10	non.classical.monocyte
10X_P7_8_AATCGGTGTCGCATAT	4	capillary.endothelial.cell
10X_P7_8_ACACCGGCAAACCTAC	8	alveolar.macrophage
10X_P7_8_ACACCGGCATCCTAGA	12	myofibroblast.cell
10X_P7_8_ACACTGAAGACCTAGG	8	alveolar.macrophage
10X_P7_8_ACAGCCGGTAATTGGA	8	alveolar.macrophage
10X_P7_8_ACAGCCGTCACATAGC	3	pulmonary.artery.endothelial.cell
10X_P7_8_ACAGCCGTCGACAGCC	8	alveolar.macrophage
10X_P7_8_ACAGCTACAAAGAATC	9	classical.monocyte
10X_P7_8_ACAGCTAGTTCATGGT	11	lymphocyte
10X_P7_8_ACAGCTAGTTGGAGGT	11	lymphocyte
10X_P7_8_ACAGCTAGTTTAGCTG	8	alveolar.macrophage
10X_P7_8_ACATACGAGAGTTGGC	11	lymphocyte
10X_P7_8_ACATACGCAGCATGAG	9	classical.monocyte
10X_P7_8_ACATCAGGTTTCGCTC	6	B.cell
10X_P7_8_ACCAGTATCATCGGAT	13	fibroblast
10X_P7_8_ACCAGTATCCCGACTT	3	pulmonary.artery.endothelial.cell
10X_P7_8_ACCCACTGTCTAAACC	9	classical.monocyte
10X_P7_8_ACGAGGACAAGCCCAC	9	classical.monocyte
10X_P7_8_ACGATGTGTAGGCATG	9	classical.monocyte
10X_P7_8_ACGCAGCCAGGGTACA	8	alveolar.macrophage
10X_P7_8_ACGCCAGAGGCTCATT	14	fibroblast.1
10X_P7_8_ACGCCAGTCGATGAGG	9	classical.monocyte
10X_P7_8_ACGCCGACAATAAGCA	3	pulmonary.artery.endothelial.cell
10X_P7_8_ACGGAGAAGTTAGCGG	1	ciliated.epithelial.cell
10X_P7_8_ACGGAGAGTGAGTGAC	3	pulmonary.artery.endothelial.cell
10X_P7_8_ACGGCCAAGACAAGCC	3	pulmonary.artery.endothelial.cell
10X_P7_8_ACGGCCACAATGGTCT	8	alveolar.macrophage
10X_P7_8_ACGGGCTCAGTCGTGC	2	pulmonary.ionocyte..type.II.pneumocyte
10X_P7_8_ACGGGTCAGCTAAACA	4	capillary.endothelial.cell
10X_P7_8_ACGGGTCGTCGAACAG	9	classical.monocyte
10X_P7_8_ACGGGTCTCGTAGATC	12	myofibroblast.cell
10X_P7_8_ACGTCAAAGGGCATGT	13	fibroblast
10X_P7_8_ACGTCAAGTTCAACCA	13	fibroblast
10X_P7_8_ACTATCTGTGTAATGA	4	capillary.endothelial.cell
10X_P7_8_ACTATCTTCCCGGATG	7	neutrophil
10X_P7_8_ACTGAACAGCCCGAAA	8	alveolar.macrophage
10X_P7_8_ACTGAACGTTCCCGAG	8	alveolar.macrophage
10X_P7_8_ACTGAACTCGTGTAGT	9	classical.monocyte
10X_P7_8_ACTGATGCACGGCTAC	10	non.classical.monocyte
10X_P7_8_ACTGATGTCATAAAGG	8	alveolar.macrophage
10X_P7_8_ACTGCTCCAAGTACCT	3	pulmonary.artery.endothelial.cell
10X_P7_8_ACTGCTCCACAAGCCC	11	lymphocyte
10X_P7_8_ACTGTCCAGTGTACGG	8	alveolar.macrophage
10X_P7_8_ACTTACTCAGCTCGAC	13	fibroblast
10X_P7_8_ACTTGTTCATATGGTC	3	pulmonary.artery.endothelial.cell
10X_P7_8_ACTTGTTGTAAACCTC	8	alveolar.macrophage
10X_P7_8_ACTTTCAGTTGACGTT	11	lymphocyte
10X_P7_8_ACTTTCAGTTTGACTG	1	ciliated.epithelial.cell
10X_P7_8_AGAATAGTCCTAGAAC	8	alveolar.macrophage
10X_P7_8_AGACGTTGTCCGAGTC	9	classical.monocyte
10X_P7_8_AGAGCGACAAGCGTAG	13	fibroblast
10X_P7_8_AGAGCGATCTGCCAGG	8	alveolar.macrophage
10X_P7_8_AGAGTGGAGATCCCGC	8	alveolar.macrophage
10X_P7_8_AGAGTGGAGTAGTGCG	8	alveolar.macrophage
10X_P7_8_AGAGTGGTCATGTCCC	10	non.classical.monocyte
10X_P7_8_AGAGTGGTCGAACTGT	8	alveolar.macrophage
10X_P7_8_AGAGTGGTCTGATTCT	4	capillary.endothelial.cell
10X_P7_8_AGATCTGGTCTTCGTC	11	lymphocyte
10X_P7_8_AGATCTGTCACGCATA	6	B.cell
10X_P7_8_AGATTGCAGAGCAATT	9	classical.monocyte
10X_P7_8_AGCATACCAAGAGTCG	11	lymphocyte
10X_P7_8_AGCCTAAAGAAGGGTA	4	capillary.endothelial.cell
10X_P7_8_AGCGGTCCATGGTCAT	11	lymphocyte
10X_P7_8_AGCTCCTAGCAGGCTA	8	alveolar.macrophage
10X_P7_8_AGCTCCTTCCGCGTTT	9	classical.monocyte
10X_P7_8_AGCTCCTTCCTTAATC	3	pulmonary.artery.endothelial.cell
10X_P7_8_AGCTCTCTCGATGAGG	6	B.cell
10X_P7_8_AGCTTGAAGCCGATTT	9	classical.monocyte
10X_P7_8_AGGGAGTCAACTGCGC	7	neutrophil
10X_P7_8_AGGGAGTTCCGCGCAA	3	pulmonary.artery.endothelial.cell
10X_P7_8_AGGGATGGTCTAACGT	1	ciliated.epithelial.cell
10X_P7_8_AGGGATGTCCCGGATG	6	B.cell
10X_P7_8_AGGTCATAGCGTCTAT	11	lymphocyte
10X_P7_8_AGGTCATTCACGCGGT	8	alveolar.macrophage
10X_P7_8_AGGTCCGCAACAACCT	9	classical.monocyte
10X_P7_8_AGGTCCGCACTTAAGC	11	lymphocyte
10X_P7_8_AGGTCCGCATCGGACC	9	classical.monocyte
10X_P7_8_AGGTCCGTCATCGGAT	6	B.cell
10X_P7_8_AGTCTTTCAATGAATG	3	pulmonary.artery.endothelial.cell
10X_P7_8_AGTCTTTGTCTCTCGT	9	classical.monocyte
10X_P7_8_AGTCTTTTCATGTGGT	3	pulmonary.artery.endothelial.cell
10X_P7_8_AGTGAGGGTTACCGAT	14	fibroblast.1
10X_P7_8_AGTGTCATCTTCAACT	13	fibroblast
10X_P7_8_AGTTGGTGTAGAGTGC	13	fibroblast
10X_P7_8_ATAACGCTCCCATTTA	3	pulmonary.artery.endothelial.cell
10X_P7_8_ATAAGAGAGCACACAG	3	pulmonary.artery.endothelial.cell
10X_P7_8_ATAAGAGCAGCTATTG	8	alveolar.macrophage
10X_P7_8_ATAAGAGGTCCGTTAA	13	fibroblast
10X_P7_8_ATAAGAGTCGCCAGCA	8	alveolar.macrophage
10X_P7_8_ATCATCTGTTCGGCAC	13	fibroblast
10X_P7_8_ATCATCTTCCTTAATC	9	classical.monocyte
10X_P7_8_ATCCACCGTGTATGGG	3	pulmonary.artery.endothelial.cell
10X_P7_8_ATCCGAAAGCCTTGAT	3	pulmonary.artery.endothelial.cell
10X_P7_8_ATCCGAAGTGAAATCA	12	myofibroblast.cell
10X_P7_8_ATCGAGTGTACCGCTG	6	B.cell
10X_P7_8_ATCTGCCTCCCTAACC	9	classical.monocyte
10X_P7_8_ATGCGATCACATTAGC	11	lymphocyte
10X_P7_8_ATGGGAGAGCAAATCA	7	neutrophil
10X_P7_8_ATTACTCGTATGCTTG	5	pericyte.cell
10X_P7_8_ATTATCCAGGAATCGC	3	pulmonary.artery.endothelial.cell
10X_P7_8_ATTATCCAGGCTCTTA	4	capillary.endothelial.cell
10X_P7_8_ATTATCCGTCGTTGTA	9	classical.monocyte
10X_P7_8_ATTCTACAGATCACGG	9	classical.monocyte
10X_P7_8_ATTGGACGTCATATGC	14	fibroblast.1
10X_P7_8_ATTTCTGCAGCCTTTC	8	alveolar.macrophage
10X_P7_8_ATTTCTGGTAGTGAAT	13	fibroblast
10X_P7_8_CAACCAATCATGTCCC	6	B.cell
10X_P7_8_CAACTAGCAGCCTGTG	5	pericyte.cell
10X_P7_8_CAAGAAATCAACGAAA	13	fibroblast
10X_P7_8_CAAGAAATCAGTTCGA	13	fibroblast
10X_P7_8_CAAGATCAGCAATATG	9	classical.monocyte
10X_P7_8_CAAGTTGCAGCTTCGG	7	neutrophil
10X_P7_8_CAAGTTGGTCTACCTC	13	fibroblast
10X_P7_8_CACAAACGTGCGATAG	8	alveolar.macrophage
10X_P7_8_CACACAAAGGATGTAT	8	alveolar.macrophage
10X_P7_8_CACACCTCAGTCAGCC	11	lymphocyte
10X_P7_8_CACACCTTCCAAAGTC	4	capillary.endothelial.cell
10X_P7_8_CACAGGCCACACTGCG	3	pulmonary.artery.endothelial.cell
10X_P7_8_CACATAGCAATAGCGG	3	pulmonary.artery.endothelial.cell
10X_P7_8_CACATAGTCGTCCAGG	3	pulmonary.artery.endothelial.cell
10X_P7_8_CACCTTGAGTTCCACA	8	alveolar.macrophage
10X_P7_8_CACCTTGGTGTCAATC	8	alveolar.macrophage
10X_P7_8_CACCTTGTCAGTTTGG	9	classical.monocyte
10X_P7_8_CAGAATCAGGCAGTCA	10	non.classical.monocyte
10X_P7_8_CAGAGAGCATCGGACC	8	alveolar.macrophage
10X_P7_8_CAGCAGCAGGGTGTGT	8	alveolar.macrophage
10X_P7_8_CAGCAGCGTCCTCTTG	8	alveolar.macrophage
10X_P7_8_CAGCATAGTGCATCTA	4	capillary.endothelial.cell
10X_P7_8_CAGCGACTCATTTGGG	3	pulmonary.artery.endothelial.cell
10X_P7_8_CAGTAACAGATAGTCA	12	myofibroblast.cell
10X_P7_8_CAGTAACAGGATCGCA	3	pulmonary.artery.endothelial.cell
10X_P7_8_CAGTCCTTCCAAAGTC	2	pulmonary.ionocyte..type.II.pneumocyte
10X_P7_8_CAGTCCTTCTAACTGG	10	non.classical.monocyte
10X_P7_8_CATATGGAGTTTCCTT	8	alveolar.macrophage
10X_P7_8_CATATGGCACAGGTTT	13	fibroblast
10X_P7_8_CATATGGGTGTTTGTG	13	fibroblast
10X_P7_8_CATATGGTCGTGGACC	11	lymphocyte
10X_P7_8_CATATTCGTCGAATCT	8	alveolar.macrophage
10X_P7_8_CATCCACAGATGGCGT	2	pulmonary.ionocyte..type.II.pneumocyte
10X_P7_8_CATCCACTCGGTGTCG	8	alveolar.macrophage
10X_P7_8_CATCGGGCAGATGAGC	3	pulmonary.artery.endothelial.cell
10X_P7_8_CATCGGGTCAGCTGGC	12	myofibroblast.cell
10X_P7_8_CATCGGGTCTCGCATC	8	alveolar.macrophage
10X_P7_8_CATGACAGTATAAACG	3	pulmonary.artery.endothelial.cell
10X_P7_8_CATGGCGGTGCGATAG	4	capillary.endothelial.cell
10X_P7_8_CCAATCCAGCAAATCA	8	alveolar.macrophage
10X_P7_8_CCACCTAAGGCCCGTT	10	non.classical.monocyte
10X_P7_8_CCACGGAGTAGAAGGA	3	pulmonary.artery.endothelial.cell
10X_P7_8_CCACGGATCAGCTCGG	4	capillary.endothelial.cell
10X_P7_8_CCACTACTCTTGTTTG	8	alveolar.macrophage
10X_P7_8_CCATGTCCACGGTTTA	11	lymphocyte
10X_P7_8_CCATGTCGTTCACGGC	10	non.classical.monocyte
10X_P7_8_CCCATACAGCTTATCG	10	non.classical.monocyte
10X_P7_8_CCGGTAGCAGTCAGAG	13	fibroblast
10X_P7_8_CCGTACTCACTCGACG	13	fibroblast
10X_P7_8_CCGTACTCATAGGATA	14	fibroblast.1
10X_P7_8_CCGTACTGTCAGATAA	8	alveolar.macrophage
10X_P7_8_CCGTACTGTCCCGACA	3	pulmonary.artery.endothelial.cell
10X_P7_8_CCGTACTTCACGGTTA	3	pulmonary.artery.endothelial.cell
10X_P7_8_CCGTGGAAGACGCACA	8	alveolar.macrophage
10X_P7_8_CCGTGGATCGCGCCAA	3	pulmonary.artery.endothelial.cell
10X_P7_8_CCGTTCAAGTACGACG	8	alveolar.macrophage
10X_P7_8_CCGTTCACATAGTAAG	11	lymphocyte
10X_P7_8_CCTAAAGAGGGAAACA	3	pulmonary.artery.endothelial.cell
10X_P7_8_CCTAAAGTCGCTGATA	2	pulmonary.ionocyte..type.II.pneumocyte
10X_P7_8_CCTACACCAACCGCCA	8	alveolar.macrophage
10X_P7_8_CCTAGCTAGCACCGCT	6	B.cell
10X_P7_8_CCTAGCTGTGACTCAT	9	classical.monocyte
10X_P7_8_CCTAGCTGTTCTGGTA	9	classical.monocyte
10X_P7_8_CCTAGCTTCTTGTTTG	7	neutrophil
10X_P7_8_CCTATTACAGCCACCA	3	pulmonary.artery.endothelial.cell
10X_P7_8_CCTCAGTTCTTAGAGC	3	pulmonary.artery.endothelial.cell
10X_P7_8_CCTCTGAAGCCACCTG	11	lymphocyte
10X_P7_8_CCTTCCCAGGACCACA	12	myofibroblast.cell
10X_P7_8_CCTTCGAAGCCGTCGT	3	pulmonary.artery.endothelial.cell
10X_P7_8_CCTTTCTAGAGCCTAG	13	fibroblast
10X_P7_8_CGAATGTGTCCGTGAC	9	classical.monocyte
10X_P7_8_CGACCTTAGATAGGAG	9	classical.monocyte
10X_P7_8_CGACCTTCACTGTGTA	8	alveolar.macrophage
10X_P7_8_CGACCTTCAGACGCTC	8	alveolar.macrophage
10X_P7_8_CGACCTTGTTCCCGAG	10	non.classical.monocyte
10X_P7_8_CGAGAAGCAGGCAGTA	3	pulmonary.artery.endothelial.cell
10X_P7_8_CGAGAAGCATGGTAGG	13	fibroblast
10X_P7_8_CGAGCCACATTGCGGC	8	alveolar.macrophage
10X_P7_8_CGATCGGAGTGGGCTA	3	pulmonary.artery.endothelial.cell
10X_P7_8_CGATGGCGTAAGGATT	12	myofibroblast.cell
10X_P7_8_CGATGGCGTAATCACC	9	classical.monocyte
10X_P7_8_CGATGTACATATGCTG	9	classical.monocyte
10X_P7_8_CGATTGATCTGGTTCC	13	fibroblast
10X_P7_8_CGCGGTAAGAGGACGG	8	alveolar.macrophage
10X_P7_8_CGCGTTTGTCCAGTAT	9	classical.monocyte
10X_P7_8_CGCTATCAGAGTAATC	8	alveolar.macrophage
10X_P7_8_CGCTGGACATGATCCA	9	classical.monocyte
10X_P7_8_CGGACACAGCGCTTAT	2	pulmonary.ionocyte..type.II.pneumocyte
10X_P7_8_CGGACACAGTGTTTGC	14	fibroblast.1
10X_P7_8_CGGACACCAGCTCGAC	3	pulmonary.artery.endothelial.cell
10X_P7_8_CGGACGTAGGCTCATT	13	fibroblast
10X_P7_8_CGGAGTCCATGAGCGA	2	pulmonary.ionocyte..type.II.pneumocyte
10X_P7_8_CGGAGTCTCCCTTGTG	4	capillary.endothelial.cell
10X_P7_8_CGGCTAGGTATCTGCA	8	alveolar.macrophage
10X_P7_8_CGGCTAGTCCACGCAG	11	lymphocyte
10X_P7_8_CGGCTAGTCGCTGATA	9	classical.monocyte
10X_P7_8_CGGGTCACACGCTTTC	9	classical.monocyte
10X_P7_8_CGGGTCATCCCAAGTA	2	pulmonary.ionocyte..type.II.pneumocyte
10X_P7_8_CGTAGCGGTAGCCTAT	8	alveolar.macrophage
10X_P7_8_CGTAGGCCAAGCGATG	11	lymphocyte
10X_P7_8_CGTCACTGTTCGTTGA	14	fibroblast.1
10X_P7_8_CGTCAGGGTATCTGCA	4	capillary.endothelial.cell
10X_P7_8_CGTCCATCACTAAGTC	7	neutrophil
10X_P7_8_CGTCTACAGGGCACTA	3	pulmonary.artery.endothelial.cell
10X_P7_8_CGTGAGCGTACACCGC	11	lymphocyte
10X_P7_8_CGTGTAACAGGCAGTA	10	non.classical.monocyte
10X_P7_8_CGTGTAAGTTTGGGCC	8	alveolar.macrophage
10X_P7_8_CGTGTCTCAGTATCTG	11	lymphocyte
10X_P7_8_CGTTGGGCAAAGAATC	2	pulmonary.ionocyte..type.II.pneumocyte
10X_P7_8_CGTTGGGCACCGAAAG	8	alveolar.macrophage
10X_P7_8_CGTTGGGGTAGCTTGT	10	non.classical.monocyte
10X_P7_8_CGTTGGGGTCATCGGC	6	B.cell
10X_P7_8_CTAACTTAGTTGTAGA	9	classical.monocyte
10X_P7_8_CTAACTTGTTGCGTTA	11	lymphocyte
10X_P7_8_CTAATGGTCGGCGCAT	3	pulmonary.artery.endothelial.cell
10X_P7_8_CTACACCTCCGTCAAA	7	neutrophil
10X_P7_8_CTACACCTCTGCGGCA	9	classical.monocyte
10X_P7_8_CTACCCAAGTATGACA	11	lymphocyte
10X_P7_8_CTACCCAGTAAAGTCA	9	classical.monocyte
10X_P7_8_CTACCCATCAAGGTAA	13	fibroblast
10X_P7_8_CTACCCATCCTGTAGA	3	pulmonary.artery.endothelial.cell
10X_P7_8_CTACCCATCTGGAGCC	3	pulmonary.artery.endothelial.cell
10X_P7_8_CTACGTCTCACTTCAT	11	lymphocyte
10X_P7_8_CTAGAGTTCACTCTTA	7	neutrophil
10X_P7_8_CTAGCCTAGTCTTGCA	11	lymphocyte
10X_P7_8_CTAGCCTCAAGCGTAG	10	non.classical.monocyte
10X_P7_8_CTAGTGAGTCGAATCT	8	alveolar.macrophage
10X_P7_8_CTAGTGAGTTCCTCCA	3	pulmonary.artery.endothelial.cell
10X_P7_8_CTCACACAGCGTTGCC	13	fibroblast
10X_P7_8_CTCACACCATATACCG	3	pulmonary.artery.endothelial.cell
10X_P7_8_CTCAGAAAGTTTCCTT	4	capillary.endothelial.cell
10X_P7_8_CTCATTACAATGGTCT	3	pulmonary.artery.endothelial.cell
10X_P7_8_CTCATTATCCACGAAT	9	classical.monocyte
10X_P7_8_CTCATTATCGTTTATC	11	lymphocyte
10X_P7_8_CTCCTAGAGAGGACGG	11	lymphocyte
10X_P7_8_CTCGAGGAGACAGACC	11	lymphocyte
10X_P7_8_CTCGAGGAGCTCCCAG	11	lymphocyte
10X_P7_8_CTCGAGGAGCTGCAAG	6	B.cell
10X_P7_8_CTCGGAGAGCAGCCTC	8	alveolar.macrophage
10X_P7_8_CTCGGGAAGCTGATAA	9	classical.monocyte
10X_P7_8_CTCGGGAGTATTAGCC	9	classical.monocyte
10X_P7_8_CTCGTCAAGTCATGCT	11	lymphocyte
10X_P7_8_CTCGTCACAGGGTACA	8	alveolar.macrophage
10X_P7_8_CTCGTCAGTTTGGGCC	10	non.classical.monocyte
10X_P7_8_CTCGTCATCAGAGGTG	8	alveolar.macrophage
10X_P7_8_CTCTAATCAGCTATTG	10	non.classical.monocyte
10X_P7_8_CTCTAATTCGTGGGAA	5	pericyte.cell
10X_P7_8_CTCTACGCATGCATGT	13	fibroblast
10X_P7_8_CTCTGGTAGACCTAGG	3	pulmonary.artery.endothelial.cell
10X_P7_8_CTCTGGTGTTTGGGCC	4	capillary.endothelial.cell
10X_P7_8_CTGATAGAGCGTCAAG	3	pulmonary.artery.endothelial.cell
10X_P7_8_CTGATAGCAGTGAGTG	13	fibroblast
10X_P7_8_CTGATAGGTTGCTCCT	7	neutrophil
10X_P7_8_CTGATAGTCCTGCCAT	13	fibroblast
10X_P7_8_CTGATCCGTTGCGCAC	6	B.cell
10X_P7_8_CTGCCTAGTGTGCGTC	3	pulmonary.artery.endothelial.cell
10X_P7_8_CTGCCTATCGGGAGTA	4	capillary.endothelial.cell
10X_P7_8_CTGGTCTCACAGACTT	6	B.cell
10X_P7_8_CTGGTCTGTCATCGGC	7	neutrophil
10X_P7_8_CTGTTTACAAATACAG	11	lymphocyte
10X_P7_8_CTGTTTAGTATTACCG	13	fibroblast
10X_P7_8_CTGTTTAGTGTTAAGA	3	pulmonary.artery.endothelial.cell
10X_P7_8_CTGTTTAGTTTAGCTG	14	fibroblast.1
10X_P7_8_CTTAACTGTTTGTTTC	10	non.classical.monocyte
10X_P7_8_CTTAACTTCTCAAGTG	10	non.classical.monocyte
10X_P7_8_CTTACCGAGAAGCCCA	10	non.classical.monocyte
10X_P7_8_CTTACCGCAAGCGTAG	8	alveolar.macrophage
10X_P7_8_CTTACCGGTTTACTCT	3	pulmonary.artery.endothelial.cell
10X_P7_8_CTTCTCTCAGCTCGAC	3	pulmonary.artery.endothelial.cell
10X_P7_8_CTTGGCTTCCTCGCAT	3	pulmonary.artery.endothelial.cell
10X_P7_8_CTTTGCGAGCAATATG	9	classical.monocyte
10X_P7_8_CTTTGCGCACTATCTT	3	pulmonary.artery.endothelial.cell
10X_P7_8_GAAACTCCAACGATCT	3	pulmonary.artery.endothelial.cell
10X_P7_8_GAAACTCCACTGTGTA	6	B.cell
10X_P7_8_GAAACTCTCTTTAGGG	10	non.classical.monocyte
10X_P7_8_GAAATGACATTACCTT	3	pulmonary.artery.endothelial.cell
10X_P7_8_GAAATGAGTCGAAAGC	11	lymphocyte
10X_P7_8_GAACATCGTAGAAGGA	11	lymphocyte
10X_P7_8_GAACATCTCTTGAGGT	10	non.classical.monocyte
10X_P7_8_GAACGGAGTTTGACAC	11	lymphocyte
10X_P7_8_GAAGCAGAGTACCGGA	3	pulmonary.artery.endothelial.cell
10X_P7_8_GAATAAGGTTATCGGT	9	classical.monocyte
10X_P7_8_GAATGAAGTGCCTTGG	3	pulmonary.artery.endothelial.cell
10X_P7_8_GACAGAGAGAAAGTGG	8	alveolar.macrophage
10X_P7_8_GACCAATAGTACGACG	6	B.cell
10X_P7_8_GACCAATTCTGCCCTA	3	pulmonary.artery.endothelial.cell
10X_P7_8_GACCTGGAGCTTCGCG	11	lymphocyte
10X_P7_8_GACCTGGAGTGATCGG	11	lymphocyte
10X_P7_8_GACGGCTAGACGCACA	3	pulmonary.artery.endothelial.cell
10X_P7_8_GACGGCTCAGATCCAT	3	pulmonary.artery.endothelial.cell
10X_P7_8_GACGGCTGTGGCTCCA	3	pulmonary.artery.endothelial.cell
10X_P7_8_GACGTGCGTAAGGGCT	11	lymphocyte
10X_P7_8_GACGTGCTCAGCACAT	4	capillary.endothelial.cell
10X_P7_8_GACGTTACATCGATGT	9	classical.monocyte
10X_P7_8_GACTAACAGCCACGTC	8	alveolar.macrophage
10X_P7_8_GACTGCGAGGTCATCT	9	classical.monocyte
10X_P7_8_GAGGTGAAGGGCTTGA	4	capillary.endothelial.cell
10X_P7_8_GAGGTGAAGTAGCGGT	13	fibroblast
10X_P7_8_GAGGTGAGTAGCGTGA	9	classical.monocyte
10X_P7_8_GAGTCCGTCAGCTCTC	11	lymphocyte
10X_P7_8_GAGTCCGTCGGAGCAA	14	fibroblast.1
10X_P7_8_GATCAGTCACACAGAG	3	pulmonary.artery.endothelial.cell
10X_P7_8_GATCAGTGTATTAGCC	9	classical.monocyte
10X_P7_8_GATCGATAGACAAGCC	4	capillary.endothelial.cell
10X_P7_8_GATCGATAGTGTACTC	9	classical.monocyte
10X_P7_8_GATCGATCAATCGGTT	3	pulmonary.artery.endothelial.cell
10X_P7_8_GATCGATTCTGCTTGC	10	non.classical.monocyte
10X_P7_8_GATCGCGGTAGCACGA	5	pericyte.cell
10X_P7_8_GATCTAGTCGAGAACG	2	pulmonary.ionocyte..type.II.pneumocyte
10X_P7_8_GATGAAAGTGGAAAGA	9	classical.monocyte
10X_P7_8_GATGAAATCGCCGTGA	8	alveolar.macrophage
10X_P7_8_GATGAGGCATTCTTAC	6	B.cell
10X_P7_8_GATTCAGGTTCGGGCT	8	alveolar.macrophage
10X_P7_8_GCAAACTGTACGAAAT	3	pulmonary.artery.endothelial.cell
10X_P7_8_GCAAACTTCGACAGCC	2	pulmonary.ionocyte..type.II.pneumocyte
10X_P7_8_GCAATCAAGATTACCC	11	lymphocyte
10X_P7_8_GCACATAAGGACCACA	4	capillary.endothelial.cell
10X_P7_8_GCACTCTAGACAGACC	13	fibroblast
10X_P7_8_GCACTCTTCCAAATGC	10	non.classical.monocyte
10X_P7_8_GCAGTTATCTTGTTTG	8	alveolar.macrophage
10X_P7_8_GCATACAAGACTTTCG	14	fibroblast.1
10X_P7_8_GCATACAGTCACAAGG	13	fibroblast
10X_P7_8_GCATGATGTCGGCACT	8	alveolar.macrophage
10X_P7_8_GCATGCGAGCGTAGTG	8	alveolar.macrophage
10X_P7_8_GCATGCGGTGGCCCTA	3	pulmonary.artery.endothelial.cell
10X_P7_8_GCATGTAAGTGCAAGC	8	alveolar.macrophage
10X_P7_8_GCATGTACATAAGACA	13	fibroblast
10X_P7_8_GCCAAATTCCTGCTTG	11	lymphocyte
10X_P7_8_GCCTCTACACATCCAA	4	capillary.endothelial.cell
10X_P7_8_GCCTCTACATAGTAAG	8	alveolar.macrophage
10X_P7_8_GCCTCTAGTTCCTCCA	11	lymphocyte
10X_P7_8_GCGACCAAGCACACAG	8	alveolar.macrophage
10X_P7_8_GCGAGAACACATCTTT	11	lymphocyte
10X_P7_8_GCGAGAATCGGCATCG	3	pulmonary.artery.endothelial.cell
10X_P7_8_GCGCAACAGACTGGGT	9	classical.monocyte
10X_P7_8_GCGCAACTCAAGATCC	3	pulmonary.artery.endothelial.cell
10X_P7_8_GCGCAGTCAACTGCGC	4	capillary.endothelial.cell
10X_P7_8_GCGCAGTCACATCCAA	13	fibroblast
10X_P7_8_GCGCCAAAGGCTATCT	10	non.classical.monocyte
10X_P7_8_GCGGGTTTCAGGATCT	9	classical.monocyte
10X_P7_8_GCTCTGTTCCACTCCA	13	fibroblast
10X_P7_8_GCTGCAGTCCAAGCCG	6	B.cell
10X_P7_8_GCTGCGACAGCTTCGG	10	non.classical.monocyte
10X_P7_8_GCTGCGACAGTAAGCG	14	fibroblast.1
10X_P7_8_GCTGCTTAGCCAACAG	3	pulmonary.artery.endothelial.cell
10X_P7_8_GCTGCTTCAAACGTGG	12	myofibroblast.cell
10X_P7_8_GCTGCTTTCATGCTCC	9	classical.monocyte
10X_P7_8_GCTGGGTGTCGTCTTC	9	classical.monocyte
10X_P7_8_GCTGGGTGTTCGCTAA	11	lymphocyte
10X_P7_8_GCTGGGTTCATATCGG	11	lymphocyte
10X_P7_8_GCTTCCAGTTCCGGCA	4	capillary.endothelial.cell
10X_P7_8_GCTTGAAAGTTAGCGG	2	pulmonary.ionocyte..type.II.pneumocyte
10X_P7_8_GCTTGAAGTACGAAAT	8	alveolar.macrophage
10X_P7_8_GCTTGAATCATAAAGG	10	non.classical.monocyte
10X_P7_8_GGAAAGCGTGGCTCCA	7	neutrophil
10X_P7_8_GGAATAATCCCGACTT	3	pulmonary.artery.endothelial.cell
10X_P7_8_GGACAAGGTATAGGTA	8	alveolar.macrophage
10X_P7_8_GGACAGACATCGGGTC	3	pulmonary.artery.endothelial.cell
10X_P7_8_GGACAGATCCTTAATC	10	non.classical.monocyte
10X_P7_8_GGATGTTAGGGAACGG	2	pulmonary.ionocyte..type.II.pneumocyte
10X_P7_8_GGATGTTTCTACCAGA	11	lymphocyte
10X_P7_8_GGATTACTCCAGAGGA	12	myofibroblast.cell
10X_P7_8_GGATTACTCTGCTTGC	3	pulmonary.artery.endothelial.cell
10X_P7_8_GGCAATTGTAAAGTCA	4	capillary.endothelial.cell
10X_P7_8_GGCAATTTCTTCTGGC	3	pulmonary.artery.endothelial.cell
10X_P7_8_GGCAATTTCTTGACGA	3	pulmonary.artery.endothelial.cell
10X_P7_8_GGCGACTGTCATCCCT	14	fibroblast.1
10X_P7_8_GGCGACTTCCACGTTC	14	fibroblast.1
10X_P7_8_GGCTCGAAGGTGATTA	13	fibroblast
10X_P7_8_GGCTCGAGTTAGGGTG	3	pulmonary.artery.endothelial.cell
10X_P7_8_GGCTCGATCTGCGTAA	10	non.classical.monocyte
10X_P7_8_GGCTGGTTCGCACTCT	9	classical.monocyte
10X_P7_8_GGGAATGCAAGGTTTC	14	fibroblast.1
10X_P7_8_GGGAATGCATACGCTA	9	classical.monocyte
10X_P7_8_GGGAATGGTACCGTTA	8	alveolar.macrophage
10X_P7_8_GGGAATGTCATATCGG	4	capillary.endothelial.cell
10X_P7_8_GGGAATGTCGTTACGA	11	lymphocyte
10X_P7_8_GGGAGATGTGTGACGA	5	pericyte.cell
10X_P7_8_GGGAGATTCGTCACGG	3	pulmonary.artery.endothelial.cell
10X_P7_8_GGGATGACAGCCAATT	10	non.classical.monocyte
10X_P7_8_GGGATGAGTCTCCCTA	9	classical.monocyte
10X_P7_8_GGGCACTTCGAGGTAG	3	pulmonary.artery.endothelial.cell
10X_P7_8_GGGTCTGCACGTAAGG	11	lymphocyte
10X_P7_8_GGGTTGCTCTCGTATT	3	pulmonary.artery.endothelial.cell
10X_P7_8_GGGTTGCTCTCTAAGG	3	pulmonary.artery.endothelial.cell
10X_P7_8_GGTATTGAGCCGGTAA	9	classical.monocyte
10X_P7_8_GGTATTGCAATAGCAA	13	fibroblast
10X_P7_8_GGTATTGGTCTGATTG	3	pulmonary.artery.endothelial.cell
10X_P7_8_GGTGTTAAGGACATTA	3	pulmonary.artery.endothelial.cell
10X_P7_8_GTAACGTAGATAGGAG	10	non.classical.monocyte
10X_P7_8_GTAACTGAGCGAGAAA	9	classical.monocyte
10X_P7_8_GTAACTGGTGTGTGCC	7	neutrophil
10X_P7_8_GTAACTGTCAAACCGT	3	pulmonary.artery.endothelial.cell
10X_P7_8_GTAACTGTCGGAGGTA	9	classical.monocyte
10X_P7_8_GTACGTAGTTAAGATG	11	lymphocyte
10X_P7_8_GTACTCCAGACCACGA	3	pulmonary.artery.endothelial.cell
10X_P7_8_GTACTCCAGCAGACTG	7	neutrophil
10X_P7_8_GTACTCCCAGTACACT	3	pulmonary.artery.endothelial.cell
10X_P7_8_GTACTTTAGAGTGACC	13	fibroblast
10X_P7_8_GTAGGCCAGAATCTCC	9	classical.monocyte
10X_P7_8_GTAGGCCCATCCCATC	11	lymphocyte
10X_P7_8_GTATTCTCACCAACCG	10	non.classical.monocyte
10X_P7_8_GTATTCTGTCCAGTTA	14	fibroblast.1
10X_P7_8_GTATTCTGTTATGTGC	10	non.classical.monocyte
10X_P7_8_GTATTCTGTTGTTTGG	11	lymphocyte
10X_P7_8_GTATTCTTCTTCTGGC	11	lymphocyte
10X_P7_8_GTCAAGTAGCTAAACA	14	fibroblast.1
10X_P7_8_GTCAAGTAGTTTCCTT	13	fibroblast
10X_P7_8_GTCAAGTTCGAATGCT	13	fibroblast
10X_P7_8_GTCACAACACGTCAGC	6	B.cell
10X_P7_8_GTCACAATCTTGAGGT	7	neutrophil
10X_P7_8_GTCATTTTCTGGCGTG	8	alveolar.macrophage
10X_P7_8_GTCGGGTAGAGACTAT	8	alveolar.macrophage
10X_P7_8_GTCGGGTCACACATGT	10	non.classical.monocyte
10X_P7_8_GTCGTAAAGCTAGGCA	11	lymphocyte
10X_P7_8_GTCGTAACACACAGAG	9	classical.monocyte
10X_P7_8_GTCGTAAGTCTAACGT	3	pulmonary.artery.endothelial.cell
10X_P7_8_GTCGTAAGTGAGGGTT	3	pulmonary.artery.endothelial.cell
10X_P7_8_GTCTCGTAGTCAAGCG	10	non.classical.monocyte
10X_P7_8_GTCTCGTAGTGCTGCC	9	classical.monocyte
10X_P7_8_GTCTCGTCATGTCGAT	4	capillary.endothelial.cell
10X_P7_8_GTCTTCGGTCAAAGCG	9	classical.monocyte
10X_P7_8_GTGCAGCCAAGTCTGT	13	fibroblast
10X_P7_8_GTGCATAAGGGAAACA	13	fibroblast
10X_P7_8_GTGCATAAGTGTCCAT	3	pulmonary.artery.endothelial.cell
10X_P7_8_GTGCATACACTTCGAA	8	alveolar.macrophage
10X_P7_8_GTGCATATCAAAGTAG	3	pulmonary.artery.endothelial.cell
10X_P7_8_GTGCATATCGTATCAG	8	alveolar.macrophage
10X_P7_8_GTGCTTCAGGGCTTCC	6	B.cell
10X_P7_8_GTGCTTCCACAGGCCT	7	neutrophil
10X_P7_8_GTGCTTCTCAGGATCT	3	pulmonary.artery.endothelial.cell
10X_P7_8_GTGGGTCCATATGCTG	3	pulmonary.artery.endothelial.cell
10X_P7_8_GTGGGTCTCGTGGACC	10	non.classical.monocyte
10X_P7_8_GTGTTAGAGTGGAGAA	3	pulmonary.artery.endothelial.cell
10X_P7_8_GTTAAGCTCGTTACGA	3	pulmonary.artery.endothelial.cell
10X_P7_8_GTTACAGCACATGGGA	3	pulmonary.artery.endothelial.cell
10X_P7_8_GTTACAGGTAGCACGA	7	neutrophil
10X_P7_8_GTTCGGGCATTATCTC	11	lymphocyte
10X_P7_8_GTTCGGGCATTTGCCC	9	classical.monocyte
10X_P7_8_GTTCGGGTCCGTTGCT	3	pulmonary.artery.endothelial.cell
10X_P7_8_GTTCTCGAGGATGCGT	12	myofibroblast.cell
10X_P7_8_GTTTCTAAGTGCAAGC	8	alveolar.macrophage
10X_P7_8_GTTTCTACAGTAAGAT	9	classical.monocyte
10X_P7_8_GTTTCTATCGTCTGCT	6	B.cell
10X_P7_8_TAAACCGTCTCTGTCG	9	classical.monocyte
10X_P7_8_TAAGAGACATTATCTC	13	fibroblast
10X_P7_8_TAAGCGTGTAAACGCG	7	neutrophil
10X_P7_8_TAAGCGTGTGAAATCA	3	pulmonary.artery.endothelial.cell
10X_P7_8_TAAGTGCGTATAGGGC	9	classical.monocyte
10X_P7_8_TACACGAAGAGCAATT	3	pulmonary.artery.endothelial.cell
10X_P7_8_TACACGACAGATTGCT	11	lymphocyte
10X_P7_8_TACACGAGTTCGAATC	10	non.classical.monocyte
10X_P7_8_TACAGTGGTGTTAAGA	10	non.classical.monocyte
10X_P7_8_TACCTATGTTAAAGTG	11	lymphocyte
10X_P7_8_TACGGATCAGCCACCA	9	classical.monocyte
10X_P7_8_TACGGGCCACTCGACG	9	classical.monocyte
10X_P7_8_TACGGGCGTCTTGTCC	8	alveolar.macrophage
10X_P7_8_TACGGGCGTGCAGACA	3	pulmonary.artery.endothelial.cell
10X_P7_8_TACGGTATCTGTTGAG	8	alveolar.macrophage
10X_P7_8_TACTCATTCAAGGCTT	9	classical.monocyte
10X_P7_8_TACTTACAGCCCAACC	3	pulmonary.artery.endothelial.cell
10X_P7_8_TACTTACAGCGAGAAA	9	classical.monocyte
10X_P7_8_TACTTACTCTTACCGC	13	fibroblast
10X_P7_8_TAGACCAGTGCTTCTC	11	lymphocyte
10X_P7_8_TAGACCAGTTGCTCCT	9	classical.monocyte
10X_P7_8_TAGCCGGCAACGATCT	3	pulmonary.artery.endothelial.cell
10X_P7_8_TAGTGGTAGACTTTCG	13	fibroblast
10X_P7_8_TAGTGGTGTTGATTGC	9	classical.monocyte
10X_P7_8_TATCTCAGTGATGTGG	11	lymphocyte
10X_P7_8_TATGCCCAGGAGCGTT	7	neutrophil
10X_P7_8_TATGCCCTCTTCGGTC	11	lymphocyte
10X_P7_8_TCAACGAAGGGATCTG	10	non.classical.monocyte
10X_P7_8_TCAACGATCCACGTGG	3	pulmonary.artery.endothelial.cell
10X_P7_8_TCAATCTTCGGGAGTA	8	alveolar.macrophage
10X_P7_8_TCAATCTTCTAACGGT	13	fibroblast
10X_P7_8_TCACAAGAGTCCGTAT	4	capillary.endothelial.cell
10X_P7_8_TCACAAGTCTATCGCC	3	pulmonary.artery.endothelial.cell
10X_P7_8_TCACGAAAGGGATCTG	11	lymphocyte
10X_P7_8_TCAGATGTCTTGTACT	3	pulmonary.artery.endothelial.cell
10X_P7_8_TCAGCAATCACCGTAA	12	myofibroblast.cell
10X_P7_8_TCAGCTCAGATGTGGC	3	pulmonary.artery.endothelial.cell
10X_P7_8_TCAGGATCAAGCCGTC	9	classical.monocyte
10X_P7_8_TCAGGATTCGTTTATC	13	fibroblast
10X_P7_8_TCAGGTAGTGGTCCGT	10	non.classical.monocyte
10X_P7_8_TCATTACCATGACGGA	10	non.classical.monocyte
10X_P7_8_TCATTTGCAGTAAGCG	8	alveolar.macrophage
10X_P7_8_TCATTTGTCAAACGGG	11	lymphocyte
10X_P7_8_TCCACACAGACAAGCC	10	non.classical.monocyte
10X_P7_8_TCGAGGCTCCCTCTTT	10	non.classical.monocyte
10X_P7_8_TCGGGACAGTCGTTTG	11	lymphocyte
10X_P7_8_TCGGGACTCGTGGACC	9	classical.monocyte
10X_P7_8_TCGTACCAGTAGATGT	13	fibroblast
10X_P7_8_TCGTACCCAGCTGCAC	9	classical.monocyte
10X_P7_8_TCTATTGCATAAAGGT	1	ciliated.epithelial.cell
10X_P7_8_TCTCATACAAATACAG	6	B.cell
10X_P7_8_TCTCTAAGTGTGCCTG	11	lymphocyte
10X_P7_8_TCTGAGAAGTGTCCCG	11	lymphocyte
10X_P7_8_TCTGGAAGTCTTCAAG	3	pulmonary.artery.endothelial.cell
10X_P7_8_TCTGGAAGTTGGAGGT	6	B.cell
10X_P7_8_TCTTCGGTCGTCACGG	9	classical.monocyte
10X_P7_8_TCTTTCCAGCTAAGAT	10	non.classical.monocyte
10X_P7_8_TCTTTCCCAGACAGGT	3	pulmonary.artery.endothelial.cell
10X_P7_8_TCTTTCCGTGCAGACA	9	classical.monocyte
10X_P7_8_TGACAACTCAGCACAT	3	pulmonary.artery.endothelial.cell
10X_P7_8_TGACGGCTCGGTGTTA	11	lymphocyte
10X_P7_8_TGAGAGGCAACACGCC	1	ciliated.epithelial.cell
10X_P7_8_TGAGAGGGTGTCAATC	7	neutrophil
10X_P7_8_TGAGCATGTTCTCATT	11	lymphocyte
10X_P7_8_TGAGCCGAGAGATGAG	7	neutrophil
10X_P7_8_TGAGCCGCACCCAGTG	10	non.classical.monocyte
10X_P7_8_TGAGGGAGTACGAAAT	9	classical.monocyte
10X_P7_8_TGAGGGAGTTGGGACA	7	neutrophil
10X_P7_8_TGCACCTTCAAACCGT	8	alveolar.macrophage
10X_P7_8_TGCCAAAAGGGCACTA	3	pulmonary.artery.endothelial.cell
10X_P7_8_TGCCAAAAGGGCTCTC	13	fibroblast
10X_P7_8_TGCCAAAGTCTCCATC	8	alveolar.macrophage
10X_P7_8_TGCCCATAGAGGGATA	9	classical.monocyte
10X_P7_8_TGCCCATAGATTACCC	3	pulmonary.artery.endothelial.cell
10X_P7_8_TGCCCATCACTTAACG	5	pericyte.cell
10X_P7_8_TGCGCAGCAGCTCCGA	10	non.classical.monocyte
10X_P7_8_TGCGGGTAGTGCGTGA	9	classical.monocyte
10X_P7_8_TGCGGGTCAAACGCGA	13	fibroblast
10X_P7_8_TGCGGGTGTGTCTGAT	9	classical.monocyte
10X_P7_8_TGCGTGGAGGGTTTCT	11	lymphocyte
10X_P7_8_TGCTACCGTCACCTAA	4	capillary.endothelial.cell
10X_P7_8_TGCTGCTCACTGTCGG	8	alveolar.macrophage
10X_P7_8_TGCTGCTCATCACGTA	3	pulmonary.artery.endothelial.cell
10X_P7_8_TGGACGCTCTCCTATA	5	pericyte.cell
10X_P7_8_TGGCCAGCATAGGATA	12	myofibroblast.cell
10X_P7_8_TGGCCAGGTTAAGTAG	3	pulmonary.artery.endothelial.cell
10X_P7_8_TGGCCAGTCCGGGTGT	6	B.cell
10X_P7_8_TGGCTGGGTTGGTGGA	14	fibroblast.1
10X_P7_8_TGGGAAGGTGAGGGTT	12	myofibroblast.cell
10X_P7_8_TGGGAAGTCAACCAAC	2	pulmonary.ionocyte..type.II.pneumocyte
10X_P7_8_TGGGCGTCACCAGGTC	7	neutrophil
10X_P7_8_TGGGCGTCAGATGGGT	8	alveolar.macrophage
10X_P7_8_TGGGCGTCATTTGCTT	8	alveolar.macrophage
10X_P7_8_TGGGCGTTCTGAGTGT	7	neutrophil
10X_P7_8_TGGTTCCAGACGCTTT	13	fibroblast
10X_P7_8_TGGTTCCAGTCAAGGC	11	lymphocyte
10X_P7_8_TGGTTCCGTTCGTCTC	8	alveolar.macrophage
10X_P7_8_TGTATTCTCGGTCCGA	8	alveolar.macrophage
10X_P7_8_TGTCCCACATATGGTC	13	fibroblast
10X_P7_8_TGTCCCATCGAGAGCA	3	pulmonary.artery.endothelial.cell
10X_P7_8_TGTGGTAAGCCGATTT	9	classical.monocyte
10X_P7_8_TGTGGTAGTTCCGGCA	3	pulmonary.artery.endothelial.cell
10X_P7_8_TGTGGTATCCAAGTAC	6	B.cell
10X_P7_8_TGTGGTATCGTACCGG	3	pulmonary.artery.endothelial.cell
10X_P7_8_TGTGTTTAGGACCACA	8	alveolar.macrophage
10X_P7_8_TGTTCCGCACAGACAG	13	fibroblast
10X_P7_8_TTAGGACCAATGGAGC	11	lymphocyte
10X_P7_8_TTAGGACCACTGAAGG	6	B.cell
10X_P7_8_TTAGGCAAGCCCAACC	10	non.classical.monocyte
10X_P7_8_TTAGGCAAGCTGCCCA	6	B.cell
10X_P7_8_TTAGGCAAGGTGCACA	13	fibroblast
10X_P7_8_TTAGGCATCCGCAGTG	3	pulmonary.artery.endothelial.cell
10X_P7_8_TTAGTTCAGGTGCTAG	8	alveolar.macrophage
10X_P7_8_TTAGTTCGTTCAGCGC	9	classical.monocyte
10X_P7_8_TTAGTTCTCCTCAACC	14	fibroblast.1
10X_P7_8_TTATGCTCACAGACAG	5	pericyte.cell
10X_P7_8_TTATGCTCACGGTGTC	9	classical.monocyte
10X_P7_8_TTATGCTTCTGGCGAC	8	alveolar.macrophage
10X_P7_8_TTCCCAGAGGGTGTTG	8	alveolar.macrophage
10X_P7_8_TTCCCAGTCCAGTAGT	9	classical.monocyte
10X_P7_8_TTCGAAGGTCTAAACC	11	lymphocyte
10X_P7_8_TTCGGTCTCATATCGG	14	fibroblast.1
10X_P7_8_TTCTCAAGTCTCCCTA	8	alveolar.macrophage
10X_P7_8_TTCTCCTAGGTAGCCA	14	fibroblast.1
10X_P7_8_TTCTCCTCACAACGTT	3	pulmonary.artery.endothelial.cell
10X_P7_8_TTCTCCTCATACGCCG	9	classical.monocyte
10X_P7_8_TTCTCCTGTGATAAGT	3	pulmonary.artery.endothelial.cell
10X_P7_8_TTCTTAGGTTCTGGTA	10	non.classical.monocyte
10X_P7_8_TTGACTTTCCGCATCT	11	lymphocyte
10X_P7_8_TTGACTTTCTCTGTCG	8	alveolar.macrophage
10X_P7_8_TTGCCGTTCCAAATGC	3	pulmonary.artery.endothelial.cell
10X_P7_8_TTGGAACAGTGTCCAT	10	non.classical.monocyte
10X_P7_8_TTGGAACGTACAGCAG	13	fibroblast
10X_P7_8_TTGGCAAAGTAGGCCA	9	classical.monocyte
10X_P7_8_TTGTAGGAGGCCCTTG	8	alveolar.macrophage
10X_P7_8_TTGTAGGAGTCTTGCA	8	alveolar.macrophage
10X_P7_8_TTTACTGCAATGTAAG	8	alveolar.macrophage
10X_P7_8_TTTATGCCAGACTCGC	7	neutrophil
10X_P7_8_TTTGCGCGTAAGAGGA	3	pulmonary.artery.endothelial.cell
10X_P7_8_TTTGCGCTCAGTCAGT	11	lymphocyte
10X_P7_8_TTTGGTTAGTTGTCGT	10	non.classical.monocyte
10X_P7_8_TTTGGTTGTAGTGAAT	13	fibroblast
10X_P7_8_TTTGTCACAGTATCTG	10	non.classical.monocyte
10X_P8_12_AAACCTGCACAAGTAA	13	fibroblast
10X_P8_12_AAACCTGTCCAAATGC	12	myofibroblast.cell
10X_P8_12_AAACCTGTCTCACATT	14	fibroblast.1
10X_P8_12_AAACGGGTCTGTGCAA	14	fibroblast.1
10X_P8_12_AAAGATGCACCAGCAC	13	fibroblast
10X_P8_12_AAAGCAACAAAGGAAG	13	fibroblast
10X_P8_12_AAAGTAGGTAACGCGA	14	fibroblast.1
10X_P8_12_AAAGTAGTCATCGGAT	13	fibroblast
10X_P8_12_AAATGCCTCGCCCTTA	11	lymphocyte
10X_P8_12_AACACGTCATTAACCG	13	fibroblast
10X_P8_12_AACACGTTCGTTTATC	13	fibroblast
10X_P8_12_AACGTTGCACGAGAGT	13	fibroblast
10X_P8_12_AACGTTGTCGCCTGTT	12	myofibroblast.cell
10X_P8_12_AACTCAGAGGAGCGAG	13	fibroblast
10X_P8_12_AACTCAGAGGTACTCT	13	fibroblast
10X_P8_12_AACTCAGTCCTAGGGC	11	lymphocyte
10X_P8_12_AACTCCCAGACGCAAC	7	neutrophil
10X_P8_12_AACTCCCCAAGCGATG	14	fibroblast.1
10X_P8_12_AACTCCCTCAACGGGA	13	fibroblast
10X_P8_12_AACTCCCTCATGCAAC	13	fibroblast
10X_P8_12_AACTCTTGTATGAAAC	12	myofibroblast.cell
10X_P8_12_AACTGGTGTACCGCTG	13	fibroblast
10X_P8_12_AAGACCTAGCTAGTGG	2	pulmonary.ionocyte..type.II.pneumocyte
10X_P8_12_AAGACCTTCTCTAAGG	13	fibroblast
10X_P8_12_AAGCCGCAGGCTAGCA	14	fibroblast.1
10X_P8_12_AAGGAGCAGTAGCGGT	13	fibroblast
10X_P8_12_AAGGAGCGTACCATCA	6	B.cell
10X_P8_12_AAGGAGCGTCCAAGTT	13	fibroblast
10X_P8_12_AAGGCAGAGATTACCC	13	fibroblast
10X_P8_12_AAGGCAGCATGCTAGT	2	pulmonary.ionocyte..type.II.pneumocyte
10X_P8_12_AAGGTTCCATGCATGT	13	fibroblast
10X_P8_12_AAGGTTCTCATCACCC	13	fibroblast
10X_P8_12_AAGGTTCTCCAAGTAC	11	lymphocyte
10X_P8_12_AAGTCTGCATATACGC	13	fibroblast
10X_P8_12_AATCGGTTCCACGTTC	13	fibroblast
10X_P8_12_ACACCAATCGTTTATC	10	non.classical.monocyte
10X_P8_12_ACACCGGAGGCGTACA	13	fibroblast
10X_P8_12_ACACTGAGTCTCCACT	14	fibroblast.1
10X_P8_12_ACAGCTACAAAGAATC	13	fibroblast
10X_P8_12_ACAGCTATCTGTCAAG	12	myofibroblast.cell
10X_P8_12_ACATCAGCAATGGAGC	13	fibroblast
10X_P8_12_ACATCAGCACGGTGTC	13	fibroblast
10X_P8_12_ACCCACTCATATACCG	13	fibroblast
10X_P8_12_ACCCACTGTGTGCGTC	11	lymphocyte
10X_P8_12_ACCGTAACACCCTATC	13	fibroblast
10X_P8_12_ACCGTAAGTGCATCTA	13	fibroblast
10X_P8_12_ACCTTTACAACTGCGC	13	fibroblast
10X_P8_12_ACGAGCCTCCTTTCGG	13	fibroblast
10X_P8_12_ACGAGGAAGCTAGCCC	14	fibroblast.1
10X_P8_12_ACGAGGAAGCTTTGGT	14	fibroblast.1
10X_P8_12_ACGAGGACACAGGAGT	13	fibroblast
10X_P8_12_ACGAGGATCAGCTCTC	13	fibroblast
10X_P8_12_ACGATACAGCTGTCTA	13	fibroblast
10X_P8_12_ACGATGTCAAACCTAC	14	fibroblast.1
10X_P8_12_ACGATGTTCAGGCCCA	11	lymphocyte
10X_P8_12_ACGCAGCCAATGGATA	11	lymphocyte
10X_P8_12_ACGCAGCGTCTCAACA	13	fibroblast
10X_P8_12_ACGCAGCGTGAGTGAC	13	fibroblast
10X_P8_12_ACGCAGCTCTCCAGGG	13	fibroblast
10X_P8_12_ACGCCAGAGCGTTCCG	11	lymphocyte
10X_P8_12_ACGCCGACAAATTGCC	2	pulmonary.ionocyte..type.II.pneumocyte
10X_P8_12_ACGCCGACAGATGGGT	13	fibroblast
10X_P8_12_ACGCCGATCGGACAAG	14	fibroblast.1
10X_P8_12_ACGCCGATCTTGCATT	13	fibroblast
10X_P8_12_ACGGAGAAGACAAAGG	13	fibroblast
10X_P8_12_ACGGAGAAGTCCAGGA	13	fibroblast
10X_P8_12_ACGGAGACACCTATCC	11	lymphocyte
10X_P8_12_ACGGCCACAGATAATG	12	myofibroblast.cell
10X_P8_12_ACGGCCACATGGATGG	13	fibroblast
10X_P8_12_ACGGCCAGTGGCTCCA	13	fibroblast
10X_P8_12_ACGGCCATCGCTAGCG	14	fibroblast.1
10X_P8_12_ACGGGTCAGAAACGAG	13	fibroblast
10X_P8_12_ACGGGTCTCGAATCCA	12	myofibroblast.cell
10X_P8_12_ACGTCAACAATCGGTT	13	fibroblast
10X_P8_12_ACTATCTAGAATAGGG	13	fibroblast
10X_P8_12_ACTATCTAGTCAAGCG	13	fibroblast
10X_P8_12_ACTATCTCAGAGCCAA	14	fibroblast.1
10X_P8_12_ACTATCTCAGGCAGTA	12	myofibroblast.cell
10X_P8_12_ACTATCTGTGTGTGCC	13	fibroblast
10X_P8_12_ACTATCTTCTCTTATG	8	alveolar.macrophage
10X_P8_12_ACTGAACCATGCTGGC	11	lymphocyte
10X_P8_12_ACTGAACGTGGGTCAA	14	fibroblast.1
10X_P8_12_ACTGAGTAGAATTGTG	14	fibroblast.1
10X_P8_12_ACTGCTCAGCTGGAAC	13	fibroblast
10X_P8_12_ACTGCTCTCTACGAGT	13	fibroblast
10X_P8_12_ACTGTCCTCCAACCAA	11	lymphocyte
10X_P8_12_ACTGTCCTCGTCACGG	12	myofibroblast.cell
10X_P8_12_ACTGTCCTCTGGTATG	10	non.classical.monocyte
10X_P8_12_ACTTACTTCAACACGT	13	fibroblast
10X_P8_12_ACTTACTTCAGCTTAG	13	fibroblast
10X_P8_12_ACTTACTTCCGTACAA	13	fibroblast
10X_P8_12_ACTTGTTAGAGGTAGA	5	pericyte.cell
10X_P8_12_ACTTGTTAGTGAAGTT	12	myofibroblast.cell
10X_P8_12_ACTTTCATCCCTCAGT	13	fibroblast
10X_P8_12_AGACGTTCATACGCTA	13	fibroblast
10X_P8_12_AGACGTTGTTAAAGTG	14	fibroblast.1
10X_P8_12_AGACGTTTCTGGTTCC	13	fibroblast
10X_P8_12_AGAGCTTAGCGTCTAT	11	lymphocyte
10X_P8_12_AGAGCTTAGGGCATGT	13	fibroblast
10X_P8_12_AGAGCTTAGTCCATAC	2	pulmonary.ionocyte..type.II.pneumocyte
10X_P8_12_AGAGCTTCAAAGAATC	2	pulmonary.ionocyte..type.II.pneumocyte
10X_P8_12_AGAGCTTCACAGACAG	13	fibroblast
10X_P8_12_AGAGTGGAGACTCGGA	13	fibroblast
10X_P8_12_AGAGTGGAGGGTTCCC	10	non.classical.monocyte
10X_P8_12_AGAGTGGGTAACGACG	2	pulmonary.ionocyte..type.II.pneumocyte
10X_P8_12_AGAGTGGTCGGACAAG	13	fibroblast
10X_P8_12_AGATCTGAGAACAATC	11	lymphocyte
10X_P8_12_AGATCTGAGGAGTCTG	13	fibroblast
10X_P8_12_AGATCTGTCTCACATT	11	lymphocyte
10X_P8_12_AGCATACGTTGCTCCT	13	fibroblast
10X_P8_12_AGCATACTCGGAAACG	10	non.classical.monocyte
10X_P8_12_AGCGGTCCAAACTGCT	13	fibroblast
10X_P8_12_AGCGGTCGTTATTCTC	14	fibroblast.1
10X_P8_12_AGCTCCTGTACAGTTC	13	fibroblast
10X_P8_12_AGCTCTCAGTGTCCCG	14	fibroblast.1
10X_P8_12_AGCTTGAGTCATATGC	12	myofibroblast.cell
10X_P8_12_AGGCCACCACCGGAAA	13	fibroblast
10X_P8_12_AGGCCACTCATTGCCC	12	myofibroblast.cell
10X_P8_12_AGGCCGTCATCGGACC	14	fibroblast.1
10X_P8_12_AGGGAGTCAGTCGATT	13	fibroblast
10X_P8_12_AGGGAGTTCTTGGGTA	10	non.classical.monocyte
10X_P8_12_AGGGATGGTTCAGACT	11	lymphocyte
10X_P8_12_AGGGTGATCTGCTGTC	13	fibroblast
10X_P8_12_AGGTCATGTTGCGCAC	13	fibroblast
10X_P8_12_AGGTCCGCACATTAGC	13	fibroblast
10X_P8_12_AGGTCCGGTTGTCTTT	2	pulmonary.ionocyte..type.II.pneumocyte
10X_P8_12_AGTCTTTCAATAGCGG	14	fibroblast.1
10X_P8_12_AGTCTTTTCGCTAGCG	2	pulmonary.ionocyte..type.II.pneumocyte
10X_P8_12_AGTGGGAGTTTAGGAA	13	fibroblast
10X_P8_12_AGTGTCAAGAGCTGCA	13	fibroblast
10X_P8_12_AGTGTCACAGCTCGAC	2	pulmonary.ionocyte..type.II.pneumocyte
10X_P8_12_AGTTGGTGTAGAGTGC	1	ciliated.epithelial.cell
10X_P8_12_AGTTGGTGTAGCTAAA	13	fibroblast
10X_P8_12_AGTTGGTGTGGTAACG	13	fibroblast
10X_P8_12_AGTTGGTGTGTAATGA	13	fibroblast
10X_P8_12_AGTTGGTTCGGCATCG	13	fibroblast
10X_P8_12_ATAACGCCATCCGCGA	13	fibroblast
10X_P8_12_ATAAGAGCACTGAAGG	13	fibroblast
10X_P8_12_ATAGACCAGGTGGGTT	14	fibroblast.1
10X_P8_12_ATAGACCTCGGAGCAA	12	myofibroblast.cell
10X_P8_12_ATCATCTAGGTGACCA	13	fibroblast
10X_P8_12_ATCATCTAGTCCGGTC	14	fibroblast.1
10X_P8_12_ATCATGGGTGATAAAC	13	fibroblast
10X_P8_12_ATCATGGTCGGTCCGA	14	fibroblast.1
10X_P8_12_ATCCACCAGAGTTGGC	11	lymphocyte
10X_P8_12_ATCCACCGTCTGATTG	13	fibroblast
10X_P8_12_ATCCACCTCAACGGCC	14	fibroblast.1
10X_P8_12_ATCCGAACATCGATGT	14	fibroblast.1
10X_P8_12_ATCCGAATCTCGGACG	14	fibroblast.1
10X_P8_12_ATCGAGTAGTGTCCAT	11	lymphocyte
10X_P8_12_ATCTACTCACGCGAAA	11	lymphocyte
10X_P8_12_ATCTACTGTATAGTAG	13	fibroblast
10X_P8_12_ATCTACTTCTAGCACA	13	fibroblast
10X_P8_12_ATCTGCCAGGGTTCCC	9	classical.monocyte
10X_P8_12_ATCTGCCGTTAAAGAC	3	pulmonary.artery.endothelial.cell
10X_P8_12_ATCTGCCTCGCTTAGA	2	pulmonary.ionocyte..type.II.pneumocyte
10X_P8_12_ATGCGATAGGTGATAT	11	lymphocyte
10X_P8_12_ATGCGATAGTTATCGC	11	lymphocyte
10X_P8_12_ATGCGATGTCCCTTGT	13	fibroblast
10X_P8_12_ATGGGAGTCTGTCTCG	13	fibroblast
10X_P8_12_ATGTGTGCATGGTCTA	13	fibroblast
10X_P8_12_ATTACTCCATGAACCT	1	ciliated.epithelial.cell
10X_P8_12_ATTACTCGTGTTCTTT	2	pulmonary.ionocyte..type.II.pneumocyte
10X_P8_12_ATTATCCAGTATCGAA	12	myofibroblast.cell
10X_P8_12_ATTCTACAGACGCAAC	11	lymphocyte
10X_P8_12_ATTCTACAGATATACG	13	fibroblast
10X_P8_12_ATTCTACCACTTCGAA	11	lymphocyte
10X_P8_12_ATTCTACGTTATCACG	13	fibroblast
10X_P8_12_ATTGGACAGCTGATAA	1	ciliated.epithelial.cell
10X_P8_12_ATTGGACGTGCACCAC	13	fibroblast
10X_P8_12_ATTTCTGCAAGGACAC	2	pulmonary.ionocyte..type.II.pneumocyte
10X_P8_12_CAACCAAAGGACGAAA	13	fibroblast
10X_P8_12_CAACCAACAAGCCCAC	13	fibroblast
10X_P8_12_CAACCAAGTTGTACAC	13	fibroblast
10X_P8_12_CAAGAAAAGTGTCCAT	1	ciliated.epithelial.cell
10X_P8_12_CAAGAAAGTGATGCCC	11	lymphocyte
10X_P8_12_CAAGAAATCCTCAATT	13	fibroblast
10X_P8_12_CAAGATCCAGTAGAGC	13	fibroblast
10X_P8_12_CAAGGCCCACCTCGTT	12	myofibroblast.cell
10X_P8_12_CAAGGCCTCAGATAAG	12	myofibroblast.cell
10X_P8_12_CAAGGCCTCTCGGACG	13	fibroblast
10X_P8_12_CAAGTTGTCCTCCTAG	13	fibroblast
10X_P8_12_CACAAACAGTTCGCGC	13	fibroblast
10X_P8_12_CACAAACGTCTGCGGT	1	ciliated.epithelial.cell
10X_P8_12_CACACAAGTGAAAGAG	13	fibroblast
10X_P8_12_CACACCTCAATGAATG	14	fibroblast.1
10X_P8_12_CACACTCAGCCCAGCT	12	myofibroblast.cell
10X_P8_12_CACACTCCAGTGACAG	14	fibroblast.1
10X_P8_12_CACACTCTCACCACCT	2	pulmonary.ionocyte..type.II.pneumocyte
10X_P8_12_CACAGGCGTGATGTCT	13	fibroblast
10X_P8_12_CACAGGCTCCTATGTT	2	pulmonary.ionocyte..type.II.pneumocyte
10X_P8_12_CACAGGCTCGGCTTGG	13	fibroblast
10X_P8_12_CACAGTAGTACGCTGC	13	fibroblast
10X_P8_12_CACAGTATCTGTGCAA	14	fibroblast.1
10X_P8_12_CACATAGCAAGGACAC	13	fibroblast
10X_P8_12_CACATAGCACCAGCAC	13	fibroblast
10X_P8_12_CACATAGTCTGTGCAA	13	fibroblast
10X_P8_12_CACATTTAGAATCTCC	11	lymphocyte
10X_P8_12_CACATTTCAGGATCGA	13	fibroblast
10X_P8_12_CACATTTTCAGCTCGG	11	lymphocyte
10X_P8_12_CACCACTAGTCAAGGC	11	lymphocyte
10X_P8_12_CACCACTCAAGCCATT	13	fibroblast
10X_P8_12_CACCACTGTCCGTGAC	6	B.cell
10X_P8_12_CACCTTGTCAAGCCTA	13	fibroblast
10X_P8_12_CAGAATCGTCTTCTCG	13	fibroblast
10X_P8_12_CAGAGAGGTAGCGTGA	14	fibroblast.1
10X_P8_12_CAGATCAAGAGCCTAG	11	lymphocyte
10X_P8_12_CAGATCACAGCGATCC	13	fibroblast
10X_P8_12_CAGATCAGTTAGAACA	13	fibroblast
10X_P8_12_CAGCAGCGTGCCTGGT	14	fibroblast.1
10X_P8_12_CAGCATAAGAGCTATA	2	pulmonary.ionocyte..type.II.pneumocyte
10X_P8_12_CAGCCGAGTCTAGTCA	13	fibroblast
10X_P8_12_CAGCCGAGTGCGAAAC	13	fibroblast
10X_P8_12_CAGCCGAGTGTAATGA	13	fibroblast
10X_P8_12_CAGCTAACAGACTCGC	11	lymphocyte
10X_P8_12_CAGCTAACATTTGCCC	13	fibroblast
10X_P8_12_CAGCTGGCACAGACTT	13	fibroblast
10X_P8_12_CAGGTGCGTGTGAATA	14	fibroblast.1
10X_P8_12_CAGTAACAGTATTGGA	14	fibroblast.1
10X_P8_12_CAGTCCTAGGGTCGAT	11	lymphocyte
10X_P8_12_CAGTCCTCATGCCTAA	11	lymphocyte
10X_P8_12_CAGTCCTGTTTGGCGC	14	fibroblast.1
10X_P8_12_CATATGGCAGAGCCAA	13	fibroblast
10X_P8_12_CATATGGTCGCGCCAA	13	fibroblast
10X_P8_12_CATATGGTCTGATTCT	13	fibroblast
10X_P8_12_CATATTCCAGGGAGAG	9	classical.monocyte
10X_P8_12_CATCAAGGTTGTTTGG	13	fibroblast
10X_P8_12_CATCCACAGGAGTACC	2	pulmonary.ionocyte..type.II.pneumocyte
10X_P8_12_CATCCACCAATGAAAC	13	fibroblast
10X_P8_12_CATCCACGTCGTGGCT	13	fibroblast
10X_P8_12_CATCGGGCAAAGAATC	11	lymphocyte
10X_P8_12_CATCGGGGTGTTGGGA	13	fibroblast
10X_P8_12_CATGACAAGCTCCTTC	13	fibroblast
10X_P8_12_CATGCCTAGCTGAAAT	11	lymphocyte
10X_P8_12_CATGCCTAGTTCGATC	13	fibroblast
10X_P8_12_CATGCCTCACATAACC	11	lymphocyte
10X_P8_12_CATGCCTGTTCGGGCT	6	B.cell
10X_P8_12_CATGGCGAGTTCCACA	11	lymphocyte
10X_P8_12_CATGGCGGTAAATGTG	13	fibroblast
10X_P8_12_CATTATCTCTGGCGAC	1	ciliated.epithelial.cell
10X_P8_12_CATTATCTCTTGTACT	14	fibroblast.1
10X_P8_12_CCAATCCAGTCGCCGT	14	fibroblast.1
10X_P8_12_CCACCTACACACAGAG	13	fibroblast
10X_P8_12_CCACCTAGTACCGAGA	13	fibroblast
10X_P8_12_CCACCTAGTATGAAAC	12	myofibroblast.cell
10X_P8_12_CCACGGAAGCGTAATA	11	lymphocyte
10X_P8_12_CCACGGAGTGGCAAAC	13	fibroblast
10X_P8_12_CCACGGATCGGGAGTA	10	non.classical.monocyte
10X_P8_12_CCAGCGATCCAGTAGT	13	fibroblast
10X_P8_12_CCATGTCAGACCGGAT	10	non.classical.monocyte
10X_P8_12_CCATTCGCAAAGGCGT	13	fibroblast
10X_P8_12_CCATTCGGTGACGCCT	13	fibroblast
10X_P8_12_CCATTCGTCCTTTACA	13	fibroblast
10X_P8_12_CCCAATCCACTAAGTC	14	fibroblast.1
10X_P8_12_CCCAGTTGTATAATGG	13	fibroblast
10X_P8_12_CCCAGTTTCGCACTCT	13	fibroblast
10X_P8_12_CCCATACCACCCATTC	11	lymphocyte
10X_P8_12_CCCTCCTTCTAACTGG	13	fibroblast
10X_P8_12_CCGGGATAGCAGCCTC	13	fibroblast
10X_P8_12_CCGGGATTCATTATCC	13	fibroblast
10X_P8_12_CCGGTAGGTTCAGTAC	5	pericyte.cell
10X_P8_12_CCGTACTGTGATAAAC	11	lymphocyte
10X_P8_12_CCGTGGAGTCAGTGGA	11	lymphocyte
10X_P8_12_CCGTGGAGTGCATCTA	14	fibroblast.1
10X_P8_12_CCGTGGAGTTCCGGCA	11	lymphocyte
10X_P8_12_CCTAAAGAGCCTATGT	11	lymphocyte
10X_P8_12_CCTAAAGCATGCGCAC	13	fibroblast
10X_P8_12_CCTAAAGTCTGTTTGT	13	fibroblast
10X_P8_12_CCTACACTCAGCGATT	13	fibroblast
10X_P8_12_CCTACCACACCGATAT	13	fibroblast
10X_P8_12_CCTACCACAGGTCCAC	13	fibroblast
10X_P8_12_CCTACCAGTACCATCA	13	fibroblast
10X_P8_12_CCTACCATCCTGCTTG	13	fibroblast
10X_P8_12_CCTAGCTCAATGGTCT	13	fibroblast
10X_P8_12_CCTAGCTCACAAGTAA	13	fibroblast
10X_P8_12_CCTATTAAGCACCGTC	12	myofibroblast.cell
10X_P8_12_CCTCTGAGTCAATGTC	8	alveolar.macrophage
10X_P8_12_CCTCTGATCTGCCAGG	13	fibroblast
10X_P8_12_CCTTACGCAAGTACCT	13	fibroblast
10X_P8_12_CCTTACGCAGGGTATG	11	lymphocyte
10X_P8_12_CCTTCCCCAGCATGAG	2	pulmonary.ionocyte..type.II.pneumocyte
10X_P8_12_CCTTCGACAACTGCTA	1	ciliated.epithelial.cell
10X_P8_12_CCTTCGAGTCCAGTTA	2	pulmonary.ionocyte..type.II.pneumocyte
10X_P8_12_CCTTTCTGTTCAGGCC	8	alveolar.macrophage
10X_P8_12_CCTTTCTTCGGTTCGG	13	fibroblast
10X_P8_12_CGAACATCAGTAAGCG	13	fibroblast
10X_P8_12_CGAACATGTAAGGGAA	6	B.cell
10X_P8_12_CGAACATGTCTAGAGG	14	fibroblast.1
10X_P8_12_CGAATGTAGAACAACT	13	fibroblast
10X_P8_12_CGAATGTTCAAACCAC	13	fibroblast
10X_P8_12_CGACCTTCATTTGCTT	13	fibroblast
10X_P8_12_CGACCTTGTTATGTGC	9	classical.monocyte
10X_P8_12_CGACCTTTCAGTACGT	14	fibroblast.1
10X_P8_12_CGACTTCTCCTCTAGC	5	pericyte.cell
10X_P8_12_CGACTTCTCTCCCTGA	13	fibroblast
10X_P8_12_CGACTTCTCTTGCCGT	12	myofibroblast.cell
10X_P8_12_CGAGAAGCAACGATGG	2	pulmonary.ionocyte..type.II.pneumocyte
10X_P8_12_CGAGCACAGCGACGTA	13	fibroblast
10X_P8_12_CGAGCACTCAATCACG	13	fibroblast
10X_P8_12_CGAGCACTCACTTATC	13	fibroblast
10X_P8_12_CGAGCCAGTATGCTTG	13	fibroblast
10X_P8_12_CGATGTAGTTGAACTC	13	fibroblast
10X_P8_12_CGATTGACACCTCGTT	12	myofibroblast.cell
10X_P8_12_CGATTGAGTGTGACGA	11	lymphocyte
10X_P8_12_CGCCAAGAGAAGGACA	14	fibroblast.1
10X_P8_12_CGCCAAGCATGCCTAA	13	fibroblast
10X_P8_12_CGCGGTAGTCTCGTTC	12	myofibroblast.cell
10X_P8_12_CGCGGTATCACCTTAT	13	fibroblast
10X_P8_12_CGCGTTTAGAATGTGT	13	fibroblast
10X_P8_12_CGCGTTTGTATTAGCC	8	alveolar.macrophage
10X_P8_12_CGCTATCAGCCCAGCT	13	fibroblast
10X_P8_12_CGCTATCTCACGCGGT	13	fibroblast
10X_P8_12_CGCTATCTCGGTCCGA	13	fibroblast
10X_P8_12_CGCTATCTCTCGTTTA	13	fibroblast
10X_P8_12_CGCTGGAAGCTAGTTC	13	fibroblast
10X_P8_12_CGCTGGAGTCACAAGG	12	myofibroblast.cell
10X_P8_12_CGGACACTCGGAAATA	13	fibroblast
10X_P8_12_CGGACGTCAATAACGA	13	fibroblast
10X_P8_12_CGGACTGCAAGCGAGT	13	fibroblast
10X_P8_12_CGGACTGGTGGACGAT	5	pericyte.cell
10X_P8_12_CGGACTGTCGTCCGTT	13	fibroblast
10X_P8_12_CGGAGTCCAAGGGTCA	13	fibroblast
10X_P8_12_CGGAGTCGTCTCACCT	13	fibroblast
10X_P8_12_CGGAGTCGTTGTACAC	13	fibroblast
10X_P8_12_CGGCTAGAGAAACGCC	2	pulmonary.ionocyte..type.II.pneumocyte
10X_P8_12_CGGCTAGTCAGTGCAT	11	lymphocyte
10X_P8_12_CGGCTAGTCGTAGGAG	13	fibroblast
10X_P8_12_CGGGTCAAGAGTAATC	13	fibroblast
10X_P8_12_CGGGTCACATCCAACA	13	fibroblast
10X_P8_12_CGGGTCAGTCTAGTGT	14	fibroblast.1
10X_P8_12_CGGGTCATCAGAGCTT	13	fibroblast
10X_P8_12_CGGGTCATCCGGGTGT	5	pericyte.cell
10X_P8_12_CGGTTAATCCATGCTC	11	lymphocyte
10X_P8_12_CGTAGCGAGAGTGAGA	5	pericyte.cell
10X_P8_12_CGTAGCGTCCGTTGCT	10	non.classical.monocyte
10X_P8_12_CGTAGCGTCTTCGGTC	8	alveolar.macrophage
10X_P8_12_CGTAGGCCAAAGTCAA	13	fibroblast
10X_P8_12_CGTCACTCAAGTAATG	13	fibroblast
10X_P8_12_CGTCACTTCGGCTACG	11	lymphocyte
10X_P8_12_CGTCAGGCACAACGTT	12	myofibroblast.cell
10X_P8_12_CGTCAGGTCACCCGAG	13	fibroblast
10X_P8_12_CGTCCATAGCCTTGAT	13	fibroblast
10X_P8_12_CGTCCATAGCGTAATA	11	lymphocyte
10X_P8_12_CGTCCATTCCTAGGGC	13	fibroblast
10X_P8_12_CGTCTACAGAGAACAG	13	fibroblast
10X_P8_12_CGTGAGCCAGCCTGTG	13	fibroblast
10X_P8_12_CGTGAGCCATGAACCT	14	fibroblast.1
10X_P8_12_CGTGAGCGTAGCGTAG	2	pulmonary.ionocyte..type.II.pneumocyte
10X_P8_12_CGTGTAATCAGATAAG	14	fibroblast.1
10X_P8_12_CGTGTCTGTACCAGTT	11	lymphocyte
10X_P8_12_CGTTAGAGTATAAACG	13	fibroblast
10X_P8_12_CGTTAGATCAACACTG	13	fibroblast
10X_P8_12_CGTTCTGAGAGGTTGC	13	fibroblast
10X_P8_12_CGTTCTGAGCTAACTC	13	fibroblast
10X_P8_12_CGTTCTGGTTCGGGCT	11	lymphocyte
10X_P8_12_CGTTCTGTCCAAAGTC	13	fibroblast
10X_P8_12_CGTTGGGTCAGCTCTC	2	pulmonary.ionocyte..type.II.pneumocyte
10X_P8_12_CGTTGGGTCTTTACAC	13	fibroblast
10X_P8_12_CTAATGGTCACCTCGT	12	myofibroblast.cell
10X_P8_12_CTACCCAAGATGGCGT	13	fibroblast
10X_P8_12_CTACCCAAGTAGTGCG	13	fibroblast
10X_P8_12_CTACCCATCATAACCG	11	lymphocyte
10X_P8_12_CTACGTCTCCCTGACT	13	fibroblast
10X_P8_12_CTAGAGTCACGAAATA	13	fibroblast
10X_P8_12_CTAGCCTTCTCTAAGG	2	pulmonary.ionocyte..type.II.pneumocyte
10X_P8_12_CTAGTGAGTAAACCTC	14	fibroblast.1
10X_P8_12_CTCACACTCCTTCAAT	2	pulmonary.ionocyte..type.II.pneumocyte
10X_P8_12_CTCACACTCTATGTGG	11	lymphocyte
10X_P8_12_CTCAGAAAGATGCGAC	5	pericyte.cell
10X_P8_12_CTCAGAAAGGATGTAT	13	fibroblast
10X_P8_12_CTCAGAACACATGACT	13	fibroblast
10X_P8_12_CTCATTACACGAAAGC	13	fibroblast
10X_P8_12_CTCATTAGTAGCCTCG	8	alveolar.macrophage
10X_P8_12_CTCATTATCGCGTTTC	13	fibroblast
10X_P8_12_CTCCTAGCAAGAGGCT	14	fibroblast.1
10X_P8_12_CTCGAAATCAGCTGGC	12	myofibroblast.cell
10X_P8_12_CTCGGAGCAGCTGTTA	8	alveolar.macrophage
10X_P8_12_CTCGGGACATCGGACC	13	fibroblast
10X_P8_12_CTCGGGACATTGCGGC	13	fibroblast
10X_P8_12_CTCGTACAGTTAACGA	13	fibroblast
10X_P8_12_CTCGTACCAAGAGTCG	11	lymphocyte
10X_P8_12_CTCGTACGTCCTCTTG	13	fibroblast
10X_P8_12_CTCTAATCACCTGGTG	13	fibroblast
10X_P8_12_CTCTAATGTCTAGAGG	13	fibroblast
10X_P8_12_CTCTACGTCGTCCAGG	13	fibroblast
10X_P8_12_CTCTGGTCATGCTAGT	10	non.classical.monocyte
10X_P8_12_CTGAAGTAGGGTCTCC	13	fibroblast
10X_P8_12_CTGAAGTCAGCTTCGG	11	lymphocyte
10X_P8_12_CTGAAGTGTATAGGTA	14	fibroblast.1
10X_P8_12_CTGAAGTTCCTCAATT	14	fibroblast.1
10X_P8_12_CTGATAGTCATGTGGT	13	fibroblast
10X_P8_12_CTGCGGAAGATCGGGT	13	fibroblast
10X_P8_12_CTGCGGAAGCTAAGAT	13	fibroblast
10X_P8_12_CTGCGGAAGGTCATCT	10	non.classical.monocyte
10X_P8_12_CTGCGGAGTGGACGAT	11	lymphocyte
10X_P8_12_CTGCTGTGTACCGTTA	13	fibroblast
10X_P8_12_CTGTGCTAGAAGCCCA	13	fibroblast
10X_P8_12_CTGTGCTCACCACCAG	13	fibroblast
10X_P8_12_CTTAACTAGTGCGTGA	14	fibroblast.1
10X_P8_12_CTTACCGGTATTCGTG	13	fibroblast
10X_P8_12_CTTACCGGTTGTTTGG	13	fibroblast
10X_P8_12_CTTAGGACACCAACCG	13	fibroblast
10X_P8_12_CTTAGGATCCTTGCCA	13	fibroblast
10X_P8_12_CTTGGCTCACCAGATT	13	fibroblast
10X_P8_12_CTTGGCTGTCGAACAG	13	fibroblast
10X_P8_12_CTTGGCTGTGTAAGTA	13	fibroblast
10X_P8_12_CTTGGCTGTGTTAAGA	2	pulmonary.ionocyte..type.II.pneumocyte
10X_P8_12_GAAACTCGTCCAGTAT	11	lymphocyte
10X_P8_12_GAAACTCGTGGTCTCG	13	fibroblast
10X_P8_12_GAAACTCTCCGATATG	13	fibroblast
10X_P8_12_GAACATCAGGGAACGG	13	fibroblast
10X_P8_12_GAACATCGTTTGACTG	13	fibroblast
10X_P8_12_GAACCTAAGAGTACCG	13	fibroblast
10X_P8_12_GAACCTACAGACACTT	12	myofibroblast.cell
10X_P8_12_GAACGGAAGATGCCTT	13	fibroblast
10X_P8_12_GAACGGACAACGCACC	13	fibroblast
10X_P8_12_GAAGCAGAGCCTCGTG	13	fibroblast
10X_P8_12_GAAGCAGAGGATGTAT	11	lymphocyte
10X_P8_12_GAAGCAGAGTGTCTCA	13	fibroblast
10X_P8_12_GAAGCAGGTCTAGTGT	13	fibroblast
10X_P8_12_GAATAAGAGTCACGCC	13	fibroblast
10X_P8_12_GAATAAGCAAGCCGCT	13	fibroblast
10X_P8_12_GAATAAGCATTGAGCT	13	fibroblast
10X_P8_12_GAATAAGGTCTGATTG	13	fibroblast
10X_P8_12_GAATAAGTCAACTCTT	11	lymphocyte
10X_P8_12_GAATAAGTCCGCGTTT	14	fibroblast.1
10X_P8_12_GAATGAACAGCTGTGC	8	alveolar.macrophage
10X_P8_12_GAATGAACAGGTCGTC	2	pulmonary.ionocyte..type.II.pneumocyte
10X_P8_12_GACACGCCACGACGAA	11	lymphocyte
10X_P8_12_GACACGCTCCAATGGT	5	pericyte.cell
10X_P8_12_GACACGCTCGAACGGA	14	fibroblast.1
10X_P8_12_GACAGAGCAACGCACC	11	lymphocyte
10X_P8_12_GACCAATAGCCACGTC	14	fibroblast.1
10X_P8_12_GACCAATCATTGGCGC	13	fibroblast
10X_P8_12_GACCTGGGTACTTAGC	13	fibroblast
10X_P8_12_GACGCGTAGGAGTCTG	14	fibroblast.1
10X_P8_12_GACGCGTCAGACAAGC	13	fibroblast
10X_P8_12_GACGCGTGTATCTGCA	12	myofibroblast.cell
10X_P8_12_GACGGCTCATAGTAAG	13	fibroblast
10X_P8_12_GACGTGCTCGGATGTT	13	fibroblast
10X_P8_12_GACGTTAAGATCTGCT	14	fibroblast.1
10X_P8_12_GACGTTAGTAACGCGA	13	fibroblast
10X_P8_12_GACGTTATCCAGAAGG	14	fibroblast.1
10X_P8_12_GACGTTATCGCCAAAT	14	fibroblast.1
10X_P8_12_GACTACAGTGAGGGAG	13	fibroblast
10X_P8_12_GACTACAGTTAAAGTG	2	pulmonary.ionocyte..type.II.pneumocyte
10X_P8_12_GACTACAGTTCGTCTC	13	fibroblast
10X_P8_12_GACTACATCCGTAGGC	13	fibroblast
10X_P8_12_GACTGCGAGGCCCGTT	13	fibroblast
10X_P8_12_GACTGCGAGGTGATTA	2	pulmonary.ionocyte..type.II.pneumocyte
10X_P8_12_GACTGCGGTGAGCGAT	10	non.classical.monocyte
10X_P8_12_GAGCAGAAGAGATGAG	14	fibroblast.1
10X_P8_12_GAGCAGAGTCCAACTA	13	fibroblast
10X_P8_12_GAGGTGACATCGGGTC	13	fibroblast
10X_P8_12_GAGGTGAGTGTTGGGA	13	fibroblast
10X_P8_12_GATCAGTCAGGAATCG	13	fibroblast
10X_P8_12_GATCGATGTTTGACTG	14	fibroblast.1
10X_P8_12_GATCGATTCTTCCTTC	13	fibroblast
10X_P8_12_GATCTAGCACGTTGGC	14	fibroblast.1
10X_P8_12_GATCTAGGTTCGGGCT	13	fibroblast
10X_P8_12_GATCTAGTCGCGATCG	13	fibroblast
10X_P8_12_GATGAAACATAGAAAC	1	ciliated.epithelial.cell
10X_P8_12_GATGAGGAGACTTTCG	14	fibroblast.1
10X_P8_12_GATGAGGCAGCATGAG	11	lymphocyte
10X_P8_12_GATGCTAAGCCCAGCT	13	fibroblast
10X_P8_12_GATTCAGAGAGGTTGC	11	lymphocyte
10X_P8_12_GCAAACTGTAAGGGAA	7	neutrophil
10X_P8_12_GCAAACTGTCTAGCCG	2	pulmonary.ionocyte..type.II.pneumocyte
10X_P8_12_GCAAACTTCGTTGCCT	8	alveolar.macrophage
10X_P8_12_GCACATAAGATCTGAA	11	lymphocyte
10X_P8_12_GCACTCTCATGCAACT	13	fibroblast
10X_P8_12_GCACTCTGTATGGTTC	13	fibroblast
10X_P8_12_GCAGCCACAGTCAGAG	2	pulmonary.ionocyte..type.II.pneumocyte
10X_P8_12_GCAGTTACAGTGGGAT	13	fibroblast
10X_P8_12_GCATACAGTGTGACGA	12	myofibroblast.cell
10X_P8_12_GCATACAGTTCCACTC	13	fibroblast
10X_P8_12_GCATGATTCGCAAACT	13	fibroblast
10X_P8_12_GCATGCGCAACGATGG	11	lymphocyte
10X_P8_12_GCATGTACAGCCTATA	13	fibroblast
10X_P8_12_GCATGTAGTACCGGCT	13	fibroblast
10X_P8_12_GCATGTATCTGCCCTA	14	fibroblast.1
10X_P8_12_GCCAAATCAGCGTTCG	13	fibroblast
10X_P8_12_GCCTCTAGTCGGCACT	14	fibroblast.1
10X_P8_12_GCGAGAACATGTTCCC	5	pericyte.cell
10X_P8_12_GCGAGAATCTGTTGAG	13	fibroblast
10X_P8_12_GCGCAACGTACCGTTA	13	fibroblast
10X_P8_12_GCGCAACTCTGCTGTC	2	pulmonary.ionocyte..type.II.pneumocyte
10X_P8_12_GCGCAGTCAATGTAAG	13	fibroblast
10X_P8_12_GCGCAGTGTTCCCGAG	12	myofibroblast.cell
10X_P8_12_GCGCCAATCTTGACGA	11	lymphocyte
10X_P8_12_GCGCGATAGGCTCAGA	5	pericyte.cell
10X_P8_12_GCGCGATCAGTCAGCC	11	lymphocyte
10X_P8_12_GCGGGTTGTGCTGTAT	11	lymphocyte
10X_P8_12_GCTCCTATCCTTAATC	13	fibroblast
10X_P8_12_GCTCTGTGTACCATCA	13	fibroblast
10X_P8_12_GCTCTGTTCGAACTGT	14	fibroblast.1
10X_P8_12_GCTCTGTTCTTCCTTC	8	alveolar.macrophage
10X_P8_12_GCTGCGACACCGATAT	13	fibroblast
10X_P8_12_GCTGCTTGTCGAGTTT	14	fibroblast.1
10X_P8_12_GCTGCTTTCAAGGCTT	2	pulmonary.ionocyte..type.II.pneumocyte
10X_P8_12_GCTGGGTGTGACAAAT	12	myofibroblast.cell
10X_P8_12_GCTTCCAAGCCAGAAC	13	fibroblast
10X_P8_12_GCTTCCAGTGGACGAT	13	fibroblast
10X_P8_12_GCTTCCATCGCATGGC	14	fibroblast.1
10X_P8_12_GCTTGAAAGCCGATTT	11	lymphocyte
10X_P8_12_GGAAAGCAGGACCACA	13	fibroblast
10X_P8_12_GGAAAGCAGGCTACGA	13	fibroblast
10X_P8_12_GGAAAGCCACTATCTT	13	fibroblast
10X_P8_12_GGAAAGCGTAGAAGGA	14	fibroblast.1
10X_P8_12_GGAAAGCTCACGGTTA	14	fibroblast.1
10X_P8_12_GGAACTTAGAGATGAG	13	fibroblast
10X_P8_12_GGAACTTAGCGATGAC	13	fibroblast
10X_P8_12_GGAACTTTCAGAGGTG	11	lymphocyte
10X_P8_12_GGAATAAAGGCCATAG	13	fibroblast
10X_P8_12_GGAATAACAAGAGGCT	13	fibroblast
10X_P8_12_GGAATAACACAAGCCC	13	fibroblast
10X_P8_12_GGAATAAGTACTCTCC	14	fibroblast.1
10X_P8_12_GGACAAGAGCCGATTT	13	fibroblast
10X_P8_12_GGACAAGAGGTAGCCA	13	fibroblast
10X_P8_12_GGACAGAAGTACGTAA	1	ciliated.epithelial.cell
10X_P8_12_GGACAGACAAGCCGCT	13	fibroblast
10X_P8_12_GGACATTAGTACGCCC	14	fibroblast.1
10X_P8_12_GGACATTAGTTTCCTT	13	fibroblast
10X_P8_12_GGACATTGTCCCGACA	11	lymphocyte
10X_P8_12_GGACATTTCACGACTA	13	fibroblast
10X_P8_12_GGACGTCAGGCTCAGA	2	pulmonary.ionocyte..type.II.pneumocyte
10X_P8_12_GGACGTCGTACCCAAT	13	fibroblast
10X_P8_12_GGATGTTCAGACACTT	13	fibroblast
10X_P8_12_GGATTACGTAGAAGGA	13	fibroblast
10X_P8_12_GGATTACTCCGCGTTT	12	myofibroblast.cell
10X_P8_12_GGATTACTCGCTTGTC	11	lymphocyte
10X_P8_12_GGCAATTGTTCAACCA	12	myofibroblast.cell
10X_P8_12_GGCCGATCATGACGGA	13	fibroblast
10X_P8_12_GGCGACTCAAGAAGAG	13	fibroblast
10X_P8_12_GGCGACTTCATGCTCC	13	fibroblast
10X_P8_12_GGCGTGTGTGGAAAGA	14	fibroblast.1
10X_P8_12_GGCGTGTGTGTGGCTC	14	fibroblast.1
10X_P8_12_GGCTCGACAGATGGCA	13	fibroblast
10X_P8_12_GGGAATGCAGTAAGAT	10	non.classical.monocyte
10X_P8_12_GGGACCTAGCCTATGT	13	fibroblast
10X_P8_12_GGGACCTCAAGCCCAC	13	fibroblast
10X_P8_12_GGGACCTCACACCGAC	11	lymphocyte
10X_P8_12_GGGACCTGTCAGATAA	5	pericyte.cell
10X_P8_12_GGGAGATCAAAGCAAT	13	fibroblast
10X_P8_12_GGGAGATCAGTCCTTC	1	ciliated.epithelial.cell
10X_P8_12_GGGAGATCATTGGGCC	13	fibroblast
10X_P8_12_GGGAGATGTTGTCGCG	13	fibroblast
10X_P8_12_GGGAGATTCTCACATT	13	fibroblast
10X_P8_12_GGGATGAGTAGAGCTG	2	pulmonary.ionocyte..type.II.pneumocyte
10X_P8_12_GGGATGAGTCTCACCT	14	fibroblast.1
10X_P8_12_GGGCACTCACCAGGTC	13	fibroblast
10X_P8_12_GGGCACTGTTTGGGCC	13	fibroblast
10X_P8_12_GGGCACTTCTGCAAGT	13	fibroblast
10X_P8_12_GGGCATCAGGCCCGTT	6	B.cell
10X_P8_12_GGGCATCGTGGAAAGA	14	fibroblast.1
10X_P8_12_GGGCATCGTTTGTGTG	13	fibroblast
10X_P8_12_GGGTCTGCACAACTGT	14	fibroblast.1
10X_P8_12_GGGTCTGGTCAAACTC	12	myofibroblast.cell
10X_P8_12_GGGTTGCCAGCTGGCT	14	fibroblast.1
10X_P8_12_GGTGCGTCACGAGAGT	13	fibroblast
10X_P8_12_GGTGCGTCATCTCCCA	11	lymphocyte
10X_P8_12_GGTGCGTGTCTCTCGT	13	fibroblast
10X_P8_12_GGTGCGTGTTTGTTTC	13	fibroblast
10X_P8_12_GGTGTTAGTTCGTGAT	3	pulmonary.artery.endothelial.cell
10X_P8_12_GTAACGTGTGCAGACA	13	fibroblast
10X_P8_12_GTAACGTTCTCTTGAT	13	fibroblast
10X_P8_12_GTAACTGCACGGTGTC	13	fibroblast
10X_P8_12_GTAACTGGTCCCTACT	14	fibroblast.1
10X_P8_12_GTAACTGTCGCCAGCA	10	non.classical.monocyte
10X_P8_12_GTAACTGTCGTCGTTC	13	fibroblast
10X_P8_12_GTACGTATCGTTACGA	2	pulmonary.ionocyte..type.II.pneumocyte
10X_P8_12_GTACTCCCATGACGGA	11	lymphocyte
10X_P8_12_GTACTTTGTAGAGTGC	5	pericyte.cell
10X_P8_12_GTAGGCCAGCTCCTCT	14	fibroblast.1
10X_P8_12_GTAGGCCCAGAAGCAC	2	pulmonary.ionocyte..type.II.pneumocyte
10X_P8_12_GTAGGCCTCTTTACGT	13	fibroblast
10X_P8_12_GTCAAGTTCCTTGCCA	13	fibroblast
10X_P8_12_GTCACAACAAGCTGGA	12	myofibroblast.cell
10X_P8_12_GTCACAAGTTATTCTC	13	fibroblast
10X_P8_12_GTCACGGAGAGTAAGG	13	fibroblast
10X_P8_12_GTCACGGTCGTCGTTC	13	fibroblast
10X_P8_12_GTCATTTCAACGATCT	13	fibroblast
10X_P8_12_GTCGTAACAAGTCATC	6	B.cell
10X_P8_12_GTCGTAACACGCATCG	13	fibroblast
10X_P8_12_GTCGTAACATAGGATA	12	myofibroblast.cell
10X_P8_12_GTCGTAATCGTATCAG	13	fibroblast
10X_P8_12_GTCGTAATCTTCCTTC	14	fibroblast.1
10X_P8_12_GTCTCGTAGCTGCCCA	13	fibroblast
10X_P8_12_GTCTCGTCAAGTTAAG	13	fibroblast
10X_P8_12_GTGCGGTCACGCCAGT	13	fibroblast
10X_P8_12_GTGCGGTTCTTCAACT	13	fibroblast
10X_P8_12_GTGCTTCAGGATGTAT	13	fibroblast
10X_P8_12_GTGGGTCAGCACCGTC	14	fibroblast.1
10X_P8_12_GTGGGTCTCAGTACGT	13	fibroblast
10X_P8_12_GTGTGCGAGGGTATCG	13	fibroblast
10X_P8_12_GTGTGCGAGTACACCT	13	fibroblast
10X_P8_12_GTGTGCGCAATCAGAA	3	pulmonary.artery.endothelial.cell
10X_P8_12_GTTAAGCCACGAAGCA	14	fibroblast.1
10X_P8_12_GTTACAGCAGATAATG	1	ciliated.epithelial.cell
10X_P8_12_GTTACAGGTCTTCAAG	12	myofibroblast.cell
10X_P8_12_GTTCATTAGACAAGCC	13	fibroblast
10X_P8_12_GTTCATTGTCATGCCG	13	fibroblast
10X_P8_12_GTTCATTGTGACCAAG	11	lymphocyte
10X_P8_12_GTTCGGGTCACCACCT	12	myofibroblast.cell
10X_P8_12_GTTCTCGAGAGGTTAT	2	pulmonary.ionocyte..type.II.pneumocyte
10X_P8_12_GTTCTCGGTCAACTGT	13	fibroblast
10X_P8_12_GTTCTCGTCCATGAAC	13	fibroblast
10X_P8_12_GTTTCTAAGAAGGGTA	13	fibroblast
10X_P8_12_GTTTCTACAAGGTTTC	11	lymphocyte
10X_P8_12_GTTTCTACACGGTAGA	5	pericyte.cell
10X_P8_12_GTTTCTAGTAACGCGA	2	pulmonary.ionocyte..type.II.pneumocyte
10X_P8_12_TAAGAGAAGGCAGGTT	12	myofibroblast.cell
10X_P8_12_TAAGCGTCAAGAAGAG	14	fibroblast.1
10X_P8_12_TAAGTGCGTACAAGTA	13	fibroblast
10X_P8_12_TACACGAAGTTATCGC	14	fibroblast.1
10X_P8_12_TACACGAGTCACTTCC	11	lymphocyte
10X_P8_12_TACAGTGCAGGCTGAA	13	fibroblast
10X_P8_12_TACAGTGCATGCCTTC	8	alveolar.macrophage
10X_P8_12_TACCTATAGCCCAGCT	14	fibroblast.1
10X_P8_12_TACGGATGTTGCGCAC	12	myofibroblast.cell
10X_P8_12_TACGGGCAGCACAGGT	12	myofibroblast.cell
10X_P8_12_TACGGGCTCCCTCTTT	14	fibroblast.1
10X_P8_12_TACGGTACAGCTGTAT	13	fibroblast
10X_P8_12_TACGGTAGTGTTAAGA	13	fibroblast
10X_P8_12_TACGGTATCTGTACGA	11	lymphocyte
10X_P8_12_TACTCATGTTCACCTC	13	fibroblast
10X_P8_12_TACTCGCAGCTAAACA	14	fibroblast.1
10X_P8_12_TACTCGCGTCGGATCC	5	pericyte.cell
10X_P8_12_TACTTACTCTGAGTGT	13	fibroblast
10X_P8_12_TACTTGTCAGGTTTCA	14	fibroblast.1
10X_P8_12_TACTTGTTCTCTGCTG	14	fibroblast.1
10X_P8_12_TAGACCAGTCTAGGTT	13	fibroblast
10X_P8_12_TAGACCATCGAACTGT	12	myofibroblast.cell
10X_P8_12_TAGAGCTAGCCCGAAA	13	fibroblast
10X_P8_12_TAGCCGGCAGGATCGA	11	lymphocyte
10X_P8_12_TAGCCGGGTACCGCTG	12	myofibroblast.cell
10X_P8_12_TAGGCATGTCAATACC	13	fibroblast
10X_P8_12_TATCAGGGTTTGGGCC	2	pulmonary.ionocyte..type.II.pneumocyte
10X_P8_12_TATTACCAGGCAGGTT	13	fibroblast
10X_P8_12_TATTACCTCGTAGATC	14	fibroblast.1
10X_P8_12_TCAACGAAGTGTTAGA	13	fibroblast
10X_P8_12_TCACAAGCAAGTTCTG	13	fibroblast
10X_P8_12_TCACAAGTCGCATGGC	13	fibroblast
10X_P8_12_TCACGAAAGCCCAGCT	14	fibroblast.1
10X_P8_12_TCAGATGGTGGTAACG	14	fibroblast.1
10X_P8_12_TCAGATGTCACATGCA	5	pericyte.cell
10X_P8_12_TCAGCTCCATTATCTC	11	lymphocyte
10X_P8_12_TCAGGATAGTTCGCGC	11	lymphocyte
10X_P8_12_TCAGGATCACACCGAC	13	fibroblast
10X_P8_12_TCAGGATCAGGAACGT	13	fibroblast
10X_P8_12_TCAGGATTCAGATAAG	2	pulmonary.ionocyte..type.II.pneumocyte
10X_P8_12_TCAGGATTCAGTCCCT	13	fibroblast
10X_P8_12_TCAGGTAAGAAACCTA	13	fibroblast
10X_P8_12_TCAGGTAAGAGCAATT	12	myofibroblast.cell
10X_P8_12_TCAGGTACAGGACCCT	13	fibroblast
10X_P8_12_TCATTACAGTGTCCAT	12	myofibroblast.cell
10X_P8_12_TCATTACGTTGCGTTA	14	fibroblast.1
10X_P8_12_TCATTACTCACGCATA	14	fibroblast.1
10X_P8_12_TCATTACTCTATCCCG	11	lymphocyte
10X_P8_12_TCATTTGAGTCGTTTG	14	fibroblast.1
10X_P8_12_TCATTTGCACTCAGGC	13	fibroblast
10X_P8_12_TCCACACCAAGCCGCT	13	fibroblast
10X_P8_12_TCCACACCACGAAATA	13	fibroblast
10X_P8_12_TCCACACCATCCAACA	13	fibroblast
10X_P8_12_TCCCGATAGTCAATAG	11	lymphocyte
10X_P8_12_TCGAGGCCACACCGCA	13	fibroblast
10X_P8_12_TCGCGAGAGACTACAA	14	fibroblast.1
10X_P8_12_TCGCGAGGTTCTGGTA	13	fibroblast
10X_P8_12_TCGCGTTCAATAACGA	11	lymphocyte
10X_P8_12_TCGCGTTCAGGACCCT	13	fibroblast
10X_P8_12_TCGCGTTTCTGTCCGT	12	myofibroblast.cell
10X_P8_12_TCGGTAACACCGCTAG	1	ciliated.epithelial.cell
10X_P8_12_TCGTACCAGTTGTAGA	11	lymphocyte
10X_P8_12_TCGTACCCATAGACTC	13	fibroblast
10X_P8_12_TCGTAGAAGTTCGATC	13	fibroblast
10X_P8_12_TCTCATAAGTGGTCCC	13	fibroblast
10X_P8_12_TCTCATACAACCGCCA	14	fibroblast.1
10X_P8_12_TCTCATATCTATGTGG	14	fibroblast.1
10X_P8_12_TCTCTAACAGACAAGC	1	ciliated.epithelial.cell
10X_P8_12_TCTCTAACAGTAGAGC	13	fibroblast
10X_P8_12_TCTGAGATCACATAGC	13	fibroblast
10X_P8_12_TCTGAGATCATGGTCA	14	fibroblast.1
10X_P8_12_TCTGGAAGTACCGCTG	12	myofibroblast.cell
10X_P8_12_TCTGGAAGTGCGCTTG	13	fibroblast
10X_P8_12_TCTTCGGCATTGTGCA	13	fibroblast
10X_P8_12_TCTTCGGGTCTGATCA	10	non.classical.monocyte
10X_P8_12_TCTTTCCAGACGCACA	11	lymphocyte
10X_P8_12_TCTTTCCAGGGTGTTG	13	fibroblast
10X_P8_12_TCTTTCCAGTACCGGA	14	fibroblast.1
10X_P8_12_TGAAAGAGTCTTCGTC	11	lymphocyte
10X_P8_12_TGAAAGATCTCTGTCG	13	fibroblast
10X_P8_12_TGACAACCAAACCCAT	11	lymphocyte
10X_P8_12_TGACAACCAGTCTTCC	11	lymphocyte
10X_P8_12_TGACAACTCAGCCTAA	14	fibroblast.1
10X_P8_12_TGACGGCAGGATATAC	13	fibroblast
10X_P8_12_TGACTAGAGATGCGAC	13	fibroblast
10X_P8_12_TGACTAGAGGGTCTCC	14	fibroblast.1
10X_P8_12_TGACTTTAGGAGCGTT	2	pulmonary.ionocyte..type.II.pneumocyte
10X_P8_12_TGACTTTCAACACCTA	13	fibroblast
10X_P8_12_TGACTTTTCACCGGGT	11	lymphocyte
10X_P8_12_TGACTTTTCTTGACGA	13	fibroblast
10X_P8_12_TGAGAGGAGAACAATC	13	fibroblast
10X_P8_12_TGAGCATGTCCATGAT	13	fibroblast
10X_P8_12_TGAGCATGTGCTGTAT	11	lymphocyte
10X_P8_12_TGAGCCGGTTGAACTC	13	fibroblast
10X_P8_12_TGAGGGATCAGAGACG	12	myofibroblast.cell
10X_P8_12_TGATTTCGTGCTAGCC	13	fibroblast
10X_P8_12_TGATTTCGTTTAAGCC	13	fibroblast
10X_P8_12_TGCACCTCAACTGCTA	11	lymphocyte
10X_P8_12_TGCACCTCACGAAAGC	12	myofibroblast.cell
10X_P8_12_TGCACCTTCTAGAGTC	2	pulmonary.ionocyte..type.II.pneumocyte
10X_P8_12_TGCCAAAAGAGTTGGC	5	pericyte.cell
10X_P8_12_TGCCCATCACCACCAG	13	fibroblast
10X_P8_12_TGCCCTACAATCTGCA	14	fibroblast.1
10X_P8_12_TGCCCTAGTAAATACG	2	pulmonary.ionocyte..type.II.pneumocyte
10X_P8_12_TGCCCTATCACCTTAT	14	fibroblast.1
10X_P8_12_TGCGCAGGTATTACCG	13	fibroblast
10X_P8_12_TGCGGGTGTTTGGGCC	1	ciliated.epithelial.cell
10X_P8_12_TGCGTGGTCAAGGCTT	13	fibroblast
10X_P8_12_TGCTGCTCACGGCTAC	11	lymphocyte
10X_P8_12_TGCTGCTGTAGATTAG	13	fibroblast
10X_P8_12_TGGACGCAGCAGACTG	14	fibroblast.1
10X_P8_12_TGGACGCAGCGCTCCA	14	fibroblast.1
10X_P8_12_TGGACGCCACGAAGCA	13	fibroblast
10X_P8_12_TGGACGCTCAGCCTAA	14	fibroblast.1
10X_P8_12_TGGCCAGCAGACAAAT	13	fibroblast
10X_P8_12_TGGCGCATCGGTTCGG	1	ciliated.epithelial.cell
10X_P8_12_TGGCTGGCAAGCCATT	11	lymphocyte
10X_P8_12_TGGGAAGAGGCCGAAT	13	fibroblast
10X_P8_12_TGGGAAGCACAAGACG	13	fibroblast
10X_P8_12_TGGGAAGGTGGTAACG	8	alveolar.macrophage
10X_P8_12_TGGTTAGCACGAAAGC	11	lymphocyte
10X_P8_12_TGGTTAGGTTCCACAA	1	ciliated.epithelial.cell
10X_P8_12_TGTATTCTCATTTGGG	14	fibroblast.1
10X_P8_12_TGTGGTACATCGGTTA	14	fibroblast.1
10X_P8_12_TGTGTTTTCCACGCAG	2	pulmonary.ionocyte..type.II.pneumocyte
10X_P8_12_TGTGTTTTCGGTTAAC	13	fibroblast
10X_P8_12_TGTTCCGCATCTCCCA	12	myofibroblast.cell
10X_P8_12_TTAACTCAGTGACTCT	2	pulmonary.ionocyte..type.II.pneumocyte
10X_P8_12_TTAACTCTCACGAAGG	14	fibroblast.1
10X_P8_12_TTAGGCACAATGCCAT	11	lymphocyte
10X_P8_12_TTAGGCAGTTCGGGCT	14	fibroblast.1
10X_P8_12_TTATGCTTCGTCGTTC	13	fibroblast
10X_P8_12_TTCCCAGAGGTAGCTG	13	fibroblast
10X_P8_12_TTCCCAGTCGCGTAGC	13	fibroblast
10X_P8_12_TTCGAAGCACATCCGG	13	fibroblast
10X_P8_12_TTCGAAGGTATATCCG	12	myofibroblast.cell
10X_P8_12_TTCGAAGGTATGGTTC	13	fibroblast
10X_P8_12_TTCGAAGTCCAGTATG	13	fibroblast
10X_P8_12_TTCGGTCAGTGTGAAT	13	fibroblast
10X_P8_12_TTCGGTCCATCCAACA	14	fibroblast.1
10X_P8_12_TTCTACAGTGAACCTT	13	fibroblast
10X_P8_12_TTCTCAAAGCTGAACG	13	fibroblast
10X_P8_12_TTCTCAAGTTATCACG	5	pericyte.cell
10X_P8_12_TTCTCAATCAAGGCTT	13	fibroblast
10X_P8_12_TTGAACGAGCTGAAAT	13	fibroblast
10X_P8_12_TTGAACGGTCACCCAG	13	fibroblast
10X_P8_12_TTGAACGGTCACCTAA	13	fibroblast
10X_P8_12_TTGAACGTCATCTGCC	13	fibroblast
10X_P8_12_TTGACTTAGCTTCGCG	2	pulmonary.ionocyte..type.II.pneumocyte
10X_P8_12_TTGACTTTCAACGAAA	13	fibroblast
10X_P8_12_TTGCCGTCATTAACCG	13	fibroblast
10X_P8_12_TTGGAACAGGGCATGT	14	fibroblast.1
10X_P8_12_TTGGAACCACAGCGTC	13	fibroblast
10X_P8_12_TTGGAACCACGAAAGC	12	myofibroblast.cell
10X_P8_12_TTGGCAACACTGTGTA	11	lymphocyte
10X_P8_12_TTGTAGGCAGTGGAGT	11	lymphocyte
10X_P8_12_TTGTAGGTCAGAGACG	11	lymphocyte
10X_P8_12_TTTACTGAGTGTCCCG	13	fibroblast
10X_P8_12_TTTACTGTCTTACCTA	14	fibroblast.1
10X_P8_12_TTTATGCAGCCACGCT	13	fibroblast
10X_P8_12_TTTATGCCATCGACGC	13	fibroblast
10X_P8_12_TTTATGCGTCCAGTGC	13	fibroblast
10X_P8_12_TTTATGCTCGGAGGTA	13	fibroblast
10X_P8_12_TTTCCTCCATACTCTT	6	B.cell
10X_P8_12_TTTGCGCCAAAGGAAG	14	fibroblast.1
10X_P8_12_TTTGCGCCATAGAAAC	13	fibroblast
10X_P8_12_TTTGCGCGTCAATACC	13	fibroblast
10X_P8_12_TTTGCGCGTTAGGGTG	14	fibroblast.1
10X_P8_12_TTTGCGCGTTCACGGC	12	myofibroblast.cell
10X_P8_12_TTTGCGCTCGAGAGCA	13	fibroblast
10X_P8_12_TTTGGTTGTTCAACCA	14	fibroblast.1
10X_P8_12_TTTGTCAAGGAATCGC	13	fibroblast
10X_P8_12_TTTGTCACACAGTCGC	11	lymphocyte

## Sheet: Skeletal muscle
Supplementary File 4D. Mouse cell clusters annotations in skeletal muscle.
Cell index	Cluster no.	Cell Ontology term
10X_P7_14_AAACCTGCAGGTCCAC	9	vein.endothelial.cell..endothelial.stalk.cell
10X_P7_14_AAACCTGCATCAGTAC	11	capillary.endothelial.cell
10X_P7_14_AAACCTGGTGCCTGGT	13	pericyte.cell
10X_P7_14_AAACCTGGTTATCACG	6	CD8.positive..alpha.beta.T.cell
10X_P7_14_AAACCTGTCCCAGGTG	7	B.cell
10X_P7_14_AAACGGGAGAGTGACC	16	skeletal.muscle.fibroblast..fibroblast
10X_P7_14_AAACGGGAGTACGCGA	16	skeletal.muscle.fibroblast..fibroblast
10X_P7_14_AAACGGGAGTTTCCTT	3	monocyte.derived.dendritic.cell
10X_P7_14_AAACGGGCAAGTCTAC	16	skeletal.muscle.fibroblast..fibroblast
10X_P7_14_AAACGGGGTCTAACGT	10	endothelial.cell.of.artery
10X_P7_14_AAAGATGAGGGCACTA	17	skeletal.muscle.fibroblast..fibroblast.1
10X_P7_14_AAAGATGCACAACTGT	14	tendon.cell
10X_P7_14_AAAGCAACATCCGTGG	19	smooth.muscle.cell
10X_P7_14_AAAGCAAGTCAACTGT	16	skeletal.muscle.fibroblast..fibroblast
10X_P7_14_AAAGCAATCACGAAGG	10	endothelial.cell.of.artery
10X_P7_14_AAAGTAGGTGCAACGA	14	tendon.cell
10X_P7_14_AAATGCCCACTCAGGC	3	monocyte.derived.dendritic.cell
10X_P7_14_AAATGCCGTAGCTAAA	7	B.cell
10X_P7_14_AAATGCCGTCAACATC	3	monocyte.derived.dendritic.cell
10X_P7_14_AAATGCCTCAACGGCC	14	tendon.cell
10X_P7_14_AAATGCCTCCCAAGTA	14	tendon.cell
10X_P7_14_AAATGCCTCCGAAGAG	11	capillary.endothelial.cell
10X_P7_14_AAATGCCTCGATCCCT	5	skeletal.muscle.satellite.cell
10X_P7_14_AACACGTAGTAGGTGC	3	monocyte.derived.dendritic.cell
10X_P7_14_AACACGTCAGTGGGAT	16	skeletal.muscle.fibroblast..fibroblast
10X_P7_14_AACCATGAGAATGTTG	16	skeletal.muscle.fibroblast..fibroblast
10X_P7_14_AACCATGAGGCCATAG	16	skeletal.muscle.fibroblast..fibroblast
10X_P7_14_AACCATGAGTCTTGCA	10	endothelial.cell.of.artery
10X_P7_14_AACCATGCACAGGTTT	14	tendon.cell
10X_P7_14_AACCATGCAGATCTGT	12	blood.vessel.endothelial.cell
10X_P7_14_AACCATGCATTAACCG	14	tendon.cell
10X_P7_14_AACCATGTCCAAGCCG	7	B.cell
10X_P7_14_AACCATGTCCTGCCAT	16	skeletal.muscle.fibroblast..fibroblast
10X_P7_14_AACCGCGCATCTCGCT	16	skeletal.muscle.fibroblast..fibroblast
10X_P7_14_AACGTTGGTCAACATC	2	macrophage
10X_P7_14_AACGTTGTCATGTCTT	17	skeletal.muscle.fibroblast..fibroblast.1
10X_P7_14_AACGTTGTCGCCGTGA	11	capillary.endothelial.cell
10X_P7_14_AACTCAGAGAATAGGG	1	striated.muscle.cell
10X_P7_14_AACTCAGAGGCTATCT	10	endothelial.cell.of.artery
10X_P7_14_AACTCAGTCACTCTTA	5	skeletal.muscle.satellite.cell
10X_P7_14_AACTCAGTCGGTTAAC	9	vein.endothelial.cell..endothelial.stalk.cell
10X_P7_14_AACTCCCAGACTACAA	16	skeletal.muscle.fibroblast..fibroblast
10X_P7_14_AACTCCCCATATGCTG	7	B.cell
10X_P7_14_AACTCCCGTGGCTCCA	10	endothelial.cell.of.artery
10X_P7_14_AACTCCCTCCTGTACC	16	skeletal.muscle.fibroblast..fibroblast
10X_P7_14_AACTCTTAGCTGATAA	7	B.cell
10X_P7_14_AACTCTTAGTGCAAGC	12	blood.vessel.endothelial.cell
10X_P7_14_AACTCTTGTAAACACA	8	endothelial.cell.of.lymphatic.vessel
10X_P7_14_AACTCTTGTCTCCATC	16	skeletal.muscle.fibroblast..fibroblast
10X_P7_14_AACTCTTTCAGCTGGC	11	capillary.endothelial.cell
10X_P7_14_AACTCTTTCGACAGCC	13	pericyte.cell
10X_P7_14_AACTCTTTCTAACGGT	6	CD8.positive..alpha.beta.T.cell
10X_P7_14_AACTGGTGTAAATACG	17	skeletal.muscle.fibroblast..fibroblast.1
10X_P7_14_AACTGGTGTACGAAAT	7	B.cell
10X_P7_14_AACTGGTGTGTGTGCC	7	B.cell
10X_P7_14_AACTGGTGTTTGCATG	5	skeletal.muscle.satellite.cell
10X_P7_14_AACTGGTTCGCATGGC	16	skeletal.muscle.fibroblast..fibroblast
10X_P7_14_AACTGGTTCTAACTGG	14	tendon.cell
10X_P7_14_AACTTTCCAAATTGCC	5	skeletal.muscle.satellite.cell
10X_P7_14_AACTTTCCAAGCGCTC	14	tendon.cell
10X_P7_14_AACTTTCCAAGGTGTG	14	tendon.cell
10X_P7_14_AACTTTCCAATGGAAT	16	skeletal.muscle.fibroblast..fibroblast
10X_P7_14_AACTTTCGTCGCGGTT	14	tendon.cell
10X_P7_14_AACTTTCGTCGTGGCT	6	CD8.positive..alpha.beta.T.cell
10X_P7_14_AACTTTCGTTTGTTTC	17	skeletal.muscle.fibroblast..fibroblast.1
10X_P7_14_AACTTTCTCTGCGGCA	16	skeletal.muscle.fibroblast..fibroblast
10X_P7_14_AAGACCTAGCCTCGTG	16	skeletal.muscle.fibroblast..fibroblast
10X_P7_14_AAGACCTAGGCATGTG	2	macrophage
10X_P7_14_AAGACCTCAGAGTGTG	6	CD8.positive..alpha.beta.T.cell
10X_P7_14_AAGACCTGTACTTGAC	16	skeletal.muscle.fibroblast..fibroblast
10X_P7_14_AAGACCTGTTCCCGAG	11	capillary.endothelial.cell
10X_P7_14_AAGACCTTCCTTGGTC	2	macrophage
10X_P7_14_AAGACCTTCGTTTATC	16	skeletal.muscle.fibroblast..fibroblast
10X_P7_14_AAGACCTTCTACCAGA	17	skeletal.muscle.fibroblast..fibroblast.1
10X_P7_14_AAGCCGCAGATACACA	5	skeletal.muscle.satellite.cell
10X_P7_14_AAGCCGCAGTGGACGT	16	skeletal.muscle.fibroblast..fibroblast
10X_P7_14_AAGCCGCTCCTAGAAC	18	myelinating.Schwann.cell
10X_P7_14_AAGCCGCTCGCCCTTA	7	B.cell
10X_P7_14_AAGGAGCAGATATACG	16	skeletal.muscle.fibroblast..fibroblast
10X_P7_14_AAGGAGCGTTAAGGGC	14	tendon.cell
10X_P7_14_AAGGCAGCACCACCAG	1	striated.muscle.cell
10X_P7_14_AAGGCAGGTAAATGTG	8	endothelial.cell.of.lymphatic.vessel
10X_P7_14_AAGGCAGTCAACGAAA	7	B.cell
10X_P7_14_AAGGCAGTCCACGTTC	11	capillary.endothelial.cell
10X_P7_14_AAGGCAGTCCACTCCA	17	skeletal.muscle.fibroblast..fibroblast.1
10X_P7_14_AAGGTTCAGCGTCTAT	2	macrophage
10X_P7_14_AAGGTTCTCTTGAGAC	16	skeletal.muscle.fibroblast..fibroblast
10X_P7_14_AAGTCTGAGCCCAGCT	7	B.cell
10X_P7_14_AAGTCTGGTAGCGTAG	12	blood.vessel.endothelial.cell
10X_P7_14_AAGTCTGGTAGTGAAT	14	tendon.cell
10X_P7_14_AAGTCTGGTGCAGTAG	6	CD8.positive..alpha.beta.T.cell
10X_P7_14_AAGTCTGGTGGTGTAG	11	capillary.endothelial.cell
10X_P7_14_AAGTCTGTCATAACCG	16	skeletal.muscle.fibroblast..fibroblast
10X_P7_14_AAGTCTGTCATTGCGA	12	blood.vessel.endothelial.cell
10X_P7_14_AATCCAGAGTGTACCT	17	skeletal.muscle.fibroblast..fibroblast.1
10X_P7_14_AATCCAGGTCAGAAGC	17	skeletal.muscle.fibroblast..fibroblast.1
10X_P7_14_AATCCAGTCACTATTC	14	tendon.cell
10X_P7_14_AATCCAGTCCTCATTA	17	skeletal.muscle.fibroblast..fibroblast.1
10X_P7_14_AATCCAGTCCTTGCCA	16	skeletal.muscle.fibroblast..fibroblast
10X_P7_14_AATCGGTAGACACGAC	16	skeletal.muscle.fibroblast..fibroblast
10X_P7_14_AATCGGTCAAAGCGGT	14	tendon.cell
10X_P7_14_AATCGGTCATCTCCCA	11	capillary.endothelial.cell
10X_P7_14_AATCGGTGTTCCCGAG	17	skeletal.muscle.fibroblast..fibroblast.1
10X_P7_14_AATCGGTTCACAGGCC	6	CD8.positive..alpha.beta.T.cell
10X_P7_14_AATCGGTTCGGAGCAA	11	capillary.endothelial.cell
10X_P7_14_ACACCAAAGCTTCGCG	7	B.cell
10X_P7_14_ACACCAATCTGGGCCA	6	CD8.positive..alpha.beta.T.cell
10X_P7_14_ACACCCTAGGCAGTCA	17	skeletal.muscle.fibroblast..fibroblast.1
10X_P7_14_ACACCCTCAAGAGTCG	7	B.cell
10X_P7_14_ACACCCTCACTATCTT	16	skeletal.muscle.fibroblast..fibroblast
10X_P7_14_ACACCCTGTCGGATCC	7	B.cell
10X_P7_14_ACACCCTGTGTCGCTG	7	B.cell
10X_P7_14_ACACCGGCAACGCACC	11	capillary.endothelial.cell
10X_P7_14_ACACCGGGTCGTGGCT	3	monocyte.derived.dendritic.cell
10X_P7_14_ACACCGGGTTGTCTTT	8	endothelial.cell.of.lymphatic.vessel
10X_P7_14_ACACCGGTCTGCTTGC	14	tendon.cell
10X_P7_14_ACACTGAAGGTCGGAT	2	macrophage
10X_P7_14_ACACTGACACTGCCAG	16	skeletal.muscle.fibroblast..fibroblast
10X_P7_14_ACACTGACAGATCGGA	16	skeletal.muscle.fibroblast..fibroblast
10X_P7_14_ACACTGACATGACGGA	16	skeletal.muscle.fibroblast..fibroblast
10X_P7_14_ACACTGAGTCCATGAT	10	endothelial.cell.of.artery
10X_P7_14_ACACTGAGTCGCTTCT	9	vein.endothelial.cell..endothelial.stalk.cell
10X_P7_14_ACACTGAGTCGTTGTA	16	skeletal.muscle.fibroblast..fibroblast
10X_P7_14_ACAGCCGAGAAACGCC	6	CD8.positive..alpha.beta.T.cell
10X_P7_14_ACAGCCGCAAAGCGGT	12	blood.vessel.endothelial.cell
10X_P7_14_ACAGCCGGTCCCTTGT	7	B.cell
10X_P7_14_ACAGCCGTCTGCAAGT	6	CD8.positive..alpha.beta.T.cell
10X_P7_14_ACAGCTACACACGCTG	10	endothelial.cell.of.artery
10X_P7_14_ACAGCTACACATCCAA	7	B.cell
10X_P7_14_ACAGCTACAGCGATCC	6	CD8.positive..alpha.beta.T.cell
10X_P7_14_ACAGCTAGTACCGCTG	11	capillary.endothelial.cell
10X_P7_14_ACAGCTATCAAGGTAA	6	CD8.positive..alpha.beta.T.cell
10X_P7_14_ACAGCTATCATATCGG	11	capillary.endothelial.cell
10X_P7_14_ACAGCTATCCCACTTG	11	capillary.endothelial.cell
10X_P7_14_ACATACGAGTGAAGTT	16	skeletal.muscle.fibroblast..fibroblast
10X_P7_14_ACATACGCAAACGTGG	11	capillary.endothelial.cell
10X_P7_14_ACATACGCATTGGTAC	5	skeletal.muscle.satellite.cell
10X_P7_14_ACATACGGTATTACCG	16	skeletal.muscle.fibroblast..fibroblast
10X_P7_14_ACATACGGTGATAAAC	16	skeletal.muscle.fibroblast..fibroblast
10X_P7_14_ACATCAGAGCCAGTAG	14	tendon.cell
10X_P7_14_ACATCAGAGTTTCCTT	13	pericyte.cell
10X_P7_14_ACATCAGTCGAACTGT	12	blood.vessel.endothelial.cell
10X_P7_14_ACATGGTAGTGTCCCG	4	T.helper.17.cell
10X_P7_14_ACATGGTCAATGAATG	16	skeletal.muscle.fibroblast..fibroblast
10X_P7_14_ACATGGTTCCTCATTA	2	macrophage
10X_P7_14_ACATGGTTCGACAGCC	17	skeletal.muscle.fibroblast..fibroblast.1
10X_P7_14_ACCAGTAAGGCTCAGA	16	skeletal.muscle.fibroblast..fibroblast
10X_P7_14_ACCAGTACAGGACGTA	11	capillary.endothelial.cell
10X_P7_14_ACCAGTAGTGCTTCTC	16	skeletal.muscle.fibroblast..fibroblast
10X_P7_14_ACCAGTATCCGATATG	17	skeletal.muscle.fibroblast..fibroblast.1
10X_P7_14_ACCCACTCATGTTCCC	8	endothelial.cell.of.lymphatic.vessel
10X_P7_14_ACCCACTGTAGGCATG	7	B.cell
10X_P7_14_ACCCACTTCACAAACC	5	skeletal.muscle.satellite.cell
10X_P7_14_ACCCACTTCCTTAATC	7	B.cell
10X_P7_14_ACCGTAAAGGTCATCT	7	B.cell
10X_P7_14_ACCGTAAGTTCCACAA	14	tendon.cell
10X_P7_14_ACCTTTAAGATGCGAC	7	B.cell
10X_P7_14_ACCTTTAAGTGATCGG	9	vein.endothelial.cell..endothelial.stalk.cell
10X_P7_14_ACCTTTACAGCCTTTC	9	vein.endothelial.cell..endothelial.stalk.cell
10X_P7_14_ACCTTTAGTGGTTTCA	11	capillary.endothelial.cell
10X_P7_14_ACCTTTATCCCTCAGT	11	capillary.endothelial.cell
10X_P7_14_ACCTTTATCGAATGCT	14	tendon.cell
10X_P7_14_ACCTTTATCGACAGCC	5	skeletal.muscle.satellite.cell
10X_P7_14_ACGAGCCCACCCAGTG	7	B.cell
10X_P7_14_ACGAGCCCATGCAACT	17	skeletal.muscle.fibroblast..fibroblast.1
10X_P7_14_ACGAGCCGTATAATGG	7	B.cell
10X_P7_14_ACGAGCCTCGGTTCGG	3	monocyte.derived.dendritic.cell
10X_P7_14_ACGAGGAAGGGAGTAA	12	blood.vessel.endothelial.cell
10X_P7_14_ACGAGGACACTCGACG	13	pericyte.cell
10X_P7_14_ACGAGGACATTACGAC	5	skeletal.muscle.satellite.cell
10X_P7_14_ACGATACAGATGCCAG	12	blood.vessel.endothelial.cell
10X_P7_14_ACGATACAGCGACGTA	9	vein.endothelial.cell..endothelial.stalk.cell
10X_P7_14_ACGATACAGTTAACGA	16	skeletal.muscle.fibroblast..fibroblast
10X_P7_14_ACGATACCATATACGC	18	myelinating.Schwann.cell
10X_P7_14_ACGATGTTCGGAGGTA	16	skeletal.muscle.fibroblast..fibroblast
10X_P7_14_ACGCAGCAGCGTTCCG	14	tendon.cell
10X_P7_14_ACGCAGCAGGCTCTTA	6	CD8.positive..alpha.beta.T.cell
10X_P7_14_ACGCAGCCAAGCGTAG	7	B.cell
10X_P7_14_ACGCAGCGTTAGAACA	7	B.cell
10X_P7_14_ACGCAGCTCAACGGCC	14	tendon.cell
10X_P7_14_ACGCCAGCACATTAGC	5	skeletal.muscle.satellite.cell
10X_P7_14_ACGCCAGTCCGAGCCA	14	tendon.cell
10X_P7_14_ACGCCGACACCTCGTT	5	skeletal.muscle.satellite.cell
10X_P7_14_ACGGAGACACAGATTC	14	tendon.cell
10X_P7_14_ACGGAGAGTACCGTAT	17	skeletal.muscle.fibroblast..fibroblast.1
10X_P7_14_ACGGAGAGTCAAAGAT	7	B.cell
10X_P7_14_ACGGAGAGTGAAATCA	11	capillary.endothelial.cell
10X_P7_14_ACGGAGATCAAACCAC	11	capillary.endothelial.cell
10X_P7_14_ACGGCCACACCCAGTG	7	B.cell
10X_P7_14_ACGGCCACACTATCTT	11	capillary.endothelial.cell
10X_P7_14_ACGGCCACAGTAGAGC	10	endothelial.cell.of.artery
10X_P7_14_ACGGCCATCATTGCCC	6	CD8.positive..alpha.beta.T.cell
10X_P7_14_ACGGGCTAGGAGTTGC	2	macrophage
10X_P7_14_ACGGGCTTCAACGCTA	7	B.cell
10X_P7_14_ACGGGCTTCTTCGGTC	8	endothelial.cell.of.lymphatic.vessel
10X_P7_14_ACGGGTCCACCGAAAG	16	skeletal.muscle.fibroblast..fibroblast
10X_P7_14_ACGGGTCGTACCGAGA	11	capillary.endothelial.cell
10X_P7_14_ACGGGTCTCTGTCTAT	10	endothelial.cell.of.artery
10X_P7_14_ACGTCAAAGACTTGAA	14	tendon.cell
10X_P7_14_ACGTCAACACTATCTT	11	capillary.endothelial.cell
10X_P7_14_ACGTCAACACTTGGAT	16	skeletal.muscle.fibroblast..fibroblast
10X_P7_14_ACGTCAACAGGACGTA	12	blood.vessel.endothelial.cell
10X_P7_14_ACGTCAATCCACGAAT	2	macrophage
10X_P7_14_ACGTCAATCTCGCTTG	5	skeletal.muscle.satellite.cell
10X_P7_14_ACTATCTAGACAAAGG	5	skeletal.muscle.satellite.cell
10X_P7_14_ACTATCTCACCGAATT	5	skeletal.muscle.satellite.cell
10X_P7_14_ACTATCTCATGACGGA	5	skeletal.muscle.satellite.cell
10X_P7_14_ACTATCTGTCCGTCAG	14	tendon.cell
10X_P7_14_ACTATCTGTTCTCATT	11	capillary.endothelial.cell
10X_P7_14_ACTATCTTCCCTAATT	17	skeletal.muscle.fibroblast..fibroblast.1
10X_P7_14_ACTATCTTCGCATGAT	5	skeletal.muscle.satellite.cell
10X_P7_14_ACTGAACAGATCTGCT	16	skeletal.muscle.fibroblast..fibroblast
10X_P7_14_ACTGAACAGCTCCTCT	10	endothelial.cell.of.artery
10X_P7_14_ACTGAACCAAGGCTCC	7	B.cell
10X_P7_14_ACTGAACGTAAATACG	16	skeletal.muscle.fibroblast..fibroblast
10X_P7_14_ACTGAACGTCACAAGG	16	skeletal.muscle.fibroblast..fibroblast
10X_P7_14_ACTGAACGTCACTTCC	14	tendon.cell
10X_P7_14_ACTGAACGTGTTTGGT	7	B.cell
10X_P7_14_ACTGAACGTTGAACTC	16	skeletal.muscle.fibroblast..fibroblast
10X_P7_14_ACTGAGTAGACTGGGT	9	vein.endothelial.cell..endothelial.stalk.cell
10X_P7_14_ACTGAGTAGATGGCGT	14	tendon.cell
10X_P7_14_ACTGAGTAGATGTCGG	14	tendon.cell
10X_P7_14_ACTGAGTGTGAACCTT	17	skeletal.muscle.fibroblast..fibroblast.1
10X_P7_14_ACTGAGTTCAGTTTGG	12	blood.vessel.endothelial.cell
10X_P7_14_ACTGAGTTCGAATCCA	2	macrophage
10X_P7_14_ACTGAGTTCTGCCAGG	11	capillary.endothelial.cell
10X_P7_14_ACTGATGAGGTACTCT	16	skeletal.muscle.fibroblast..fibroblast
10X_P7_14_ACTGCTCAGGCTAGAC	7	B.cell
10X_P7_14_ACTGCTCAGTGAACGC	7	B.cell
10X_P7_14_ACTGCTCTCCGGCACA	11	capillary.endothelial.cell
10X_P7_14_ACTGTCCCAAACCTAC	19	smooth.muscle.cell
10X_P7_14_ACTGTCCCACCATGTA	10	endothelial.cell.of.artery
10X_P7_14_ACTGTCCGTCATGCCG	7	B.cell
10X_P7_14_ACTGTCCGTGACTACT	8	endothelial.cell.of.lymphatic.vessel
10X_P7_14_ACTGTCCGTTTCGCTC	14	tendon.cell
10X_P7_14_ACTTACTAGCAAATCA	5	skeletal.muscle.satellite.cell
10X_P7_14_ACTTACTAGTCCGGTC	7	B.cell
10X_P7_14_ACTTACTAGTTCGCGC	2	macrophage
10X_P7_14_ACTTACTCACAACGTT	12	blood.vessel.endothelial.cell
10X_P7_14_ACTTACTCACCAGCAC	12	blood.vessel.endothelial.cell
10X_P7_14_ACTTACTGTGGTGTAG	9	vein.endothelial.cell..endothelial.stalk.cell
10X_P7_14_ACTTACTTCAATCACG	1	striated.muscle.cell
10X_P7_14_ACTTACTTCATCATTC	12	blood.vessel.endothelial.cell
10X_P7_14_ACTTGTTAGAGTAAGG	16	skeletal.muscle.fibroblast..fibroblast
10X_P7_14_ACTTGTTAGCGACGTA	16	skeletal.muscle.fibroblast..fibroblast
10X_P7_14_ACTTGTTGTAGTGAAT	12	blood.vessel.endothelial.cell
10X_P7_14_ACTTGTTGTCCGAATT	5	skeletal.muscle.satellite.cell
10X_P7_14_ACTTGTTTCCGCAGTG	6	CD8.positive..alpha.beta.T.cell
10X_P7_14_ACTTTCACACGACGAA	10	endothelial.cell.of.artery
10X_P7_14_ACTTTCACAGCTGCTG	6	CD8.positive..alpha.beta.T.cell
10X_P7_14_ACTTTCAGTAGTGAAT	3	monocyte.derived.dendritic.cell
10X_P7_14_AGAATAGCAAAGCAAT	15	stromal.cell
10X_P7_14_AGAATAGGTCAGTGGA	12	blood.vessel.endothelial.cell
10X_P7_14_AGAATAGGTTAAGGGC	7	B.cell
10X_P7_14_AGAATAGTCACATGCA	14	tendon.cell
10X_P7_14_AGAATAGTCGCGTTTC	14	tendon.cell
10X_P7_14_AGACGTTAGTGAAGTT	7	B.cell
10X_P7_14_AGACGTTCAACACCTA	16	skeletal.muscle.fibroblast..fibroblast
10X_P7_14_AGACGTTGTAGGGACT	16	skeletal.muscle.fibroblast..fibroblast
10X_P7_14_AGACGTTGTGTTGAGG	7	B.cell
10X_P7_14_AGAGCGAAGGGTATCG	11	capillary.endothelial.cell
10X_P7_14_AGAGCGAAGGGTTCCC	9	vein.endothelial.cell..endothelial.stalk.cell
10X_P7_14_AGAGCGACAATCCGAT	16	skeletal.muscle.fibroblast..fibroblast
10X_P7_14_AGAGCGACACATGTGT	7	B.cell
10X_P7_14_AGAGCGACATTCCTGC	3	monocyte.derived.dendritic.cell
10X_P7_14_AGAGCGAGTATTCTCT	4	T.helper.17.cell
10X_P7_14_AGAGCTTAGGATGGAA	16	skeletal.muscle.fibroblast..fibroblast
10X_P7_14_AGAGCTTCACCCAGTG	5	skeletal.muscle.satellite.cell
10X_P7_14_AGAGCTTGTAAGAGAG	16	skeletal.muscle.fibroblast..fibroblast
10X_P7_14_AGAGCTTGTAGCCTAT	13	pericyte.cell
10X_P7_14_AGAGCTTTCGTGGACC	5	skeletal.muscle.satellite.cell
10X_P7_14_AGAGTGGAGGAACTGC	7	B.cell
10X_P7_14_AGAGTGGCATTACGAC	16	skeletal.muscle.fibroblast..fibroblast
10X_P7_14_AGAGTGGGTCGAACAG	5	skeletal.muscle.satellite.cell
10X_P7_14_AGAGTGGGTGGTCCGT	14	tendon.cell
10X_P7_14_AGATCTGAGACTACAA	11	capillary.endothelial.cell
10X_P7_14_AGATCTGAGCAAATCA	7	B.cell
10X_P7_14_AGATCTGAGGAGTTTA	7	B.cell
10X_P7_14_AGATCTGCAGCTATTG	14	tendon.cell
10X_P7_14_AGATCTGTCAAACCGT	12	blood.vessel.endothelial.cell
10X_P7_14_AGATCTGTCAACACAC	11	capillary.endothelial.cell
10X_P7_14_AGATTGCCAAGCGATG	14	tendon.cell
10X_P7_14_AGATTGCCAGTTAACC	7	B.cell
10X_P7_14_AGATTGCGTTATTCTC	2	macrophage
10X_P7_14_AGATTGCTCGTACCGG	12	blood.vessel.endothelial.cell
10X_P7_14_AGCAGCCAGCGTGTCC	12	blood.vessel.endothelial.cell
10X_P7_14_AGCAGCCAGGTGATAT	12	blood.vessel.endothelial.cell
10X_P7_14_AGCAGCCCAGAGTGTG	14	tendon.cell
10X_P7_14_AGCAGCCCATATACCG	12	blood.vessel.endothelial.cell
10X_P7_14_AGCAGCCGTACCCAAT	5	skeletal.muscle.satellite.cell
10X_P7_14_AGCAGCCGTATATGAG	11	capillary.endothelial.cell
10X_P7_14_AGCAGCCTCACATACG	14	tendon.cell
10X_P7_14_AGCAGCCTCTAACTGG	9	vein.endothelial.cell..endothelial.stalk.cell
10X_P7_14_AGCATACAGAGCTATA	4	T.helper.17.cell
10X_P7_14_AGCATACAGGGTGTTG	13	pericyte.cell
10X_P7_14_AGCATACAGTACGCCC	15	stromal.cell
10X_P7_14_AGCATACCAGGCGATA	10	endothelial.cell.of.artery
10X_P7_14_AGCATACGTAATTGGA	11	capillary.endothelial.cell
10X_P7_14_AGCATACGTGACTCAT	7	B.cell
10X_P7_14_AGCCTAAAGCGCTTAT	13	pericyte.cell
10X_P7_14_AGCCTAAAGCTCTCGG	11	capillary.endothelial.cell
10X_P7_14_AGCCTAAAGGAATCGC	17	skeletal.muscle.fibroblast..fibroblast.1
10X_P7_14_AGCCTAAGTAATAGCA	2	macrophage
10X_P7_14_AGCCTAAGTGATGTCT	17	skeletal.muscle.fibroblast..fibroblast.1
10X_P7_14_AGCGGTCAGCAAATCA	7	B.cell
10X_P7_14_AGCGGTCCAAGAAGAG	3	monocyte.derived.dendritic.cell
10X_P7_14_AGCGGTCCAGCCAGAA	5	skeletal.muscle.satellite.cell
10X_P7_14_AGCGGTCGTAAATGTG	2	macrophage
10X_P7_14_AGCGGTCGTAATCACC	6	CD8.positive..alpha.beta.T.cell
10X_P7_14_AGCGGTCGTCTCCATC	17	skeletal.muscle.fibroblast..fibroblast.1
10X_P7_14_AGCGGTCTCGTGACAT	16	skeletal.muscle.fibroblast..fibroblast
10X_P7_14_AGCGTATAGATGTAAC	11	capillary.endothelial.cell
10X_P7_14_AGCGTATCAAGCTGAG	16	skeletal.muscle.fibroblast..fibroblast
10X_P7_14_AGCGTATCATCCTAGA	12	blood.vessel.endothelial.cell
10X_P7_14_AGCGTATCATCTCGCT	12	blood.vessel.endothelial.cell
10X_P7_14_AGCGTATGTCCGAGTC	5	skeletal.muscle.satellite.cell
10X_P7_14_AGCGTATGTCGTTGTA	7	B.cell
10X_P7_14_AGCGTATGTTCGTGAT	7	B.cell
10X_P7_14_AGCGTCGCAATAACGA	17	skeletal.muscle.fibroblast..fibroblast.1
10X_P7_14_AGCGTCGGTCGCATAT	2	macrophage
10X_P7_14_AGCGTCGGTGGTGTAG	6	CD8.positive..alpha.beta.T.cell
10X_P7_14_AGCGTCGTCAGTTGAC	14	tendon.cell
10X_P7_14_AGCGTCGTCCCAGGTG	5	skeletal.muscle.satellite.cell
10X_P7_14_AGCTCCTAGCGCTTAT	9	vein.endothelial.cell..endothelial.stalk.cell
10X_P7_14_AGCTCCTCACGAAACG	12	blood.vessel.endothelial.cell
10X_P7_14_AGCTCCTTCAACACGT	6	CD8.positive..alpha.beta.T.cell
10X_P7_14_AGCTCCTTCACCGGGT	10	endothelial.cell.of.artery
10X_P7_14_AGCTCCTTCTGGTATG	10	endothelial.cell.of.artery
10X_P7_14_AGCTCTCGTCCAGTAT	12	blood.vessel.endothelial.cell
10X_P7_14_AGCTCTCGTTAAGACA	6	CD8.positive..alpha.beta.T.cell
10X_P7_14_AGCTCTCGTTCCATGA	14	tendon.cell
10X_P7_14_AGCTCTCTCAGGCGAA	3	monocyte.derived.dendritic.cell
10X_P7_14_AGCTTGAAGAGTAAGG	8	endothelial.cell.of.lymphatic.vessel
10X_P7_14_AGCTTGACAAAGGAAG	7	B.cell
10X_P7_14_AGCTTGACACCAGATT	12	blood.vessel.endothelial.cell
10X_P7_14_AGCTTGACACCGAATT	7	B.cell
10X_P7_14_AGGCCACAGGCTAGAC	3	monocyte.derived.dendritic.cell
10X_P7_14_AGGCCACAGTGGGTTG	5	skeletal.muscle.satellite.cell
10X_P7_14_AGGCCACGTCAGAAGC	17	skeletal.muscle.fibroblast..fibroblast.1
10X_P7_14_AGGCCACTCACGCGGT	6	CD8.positive..alpha.beta.T.cell
10X_P7_14_AGGCCACTCCCTGACT	16	skeletal.muscle.fibroblast..fibroblast
10X_P7_14_AGGCCACTCCTCAATT	7	B.cell
10X_P7_14_AGGCCACTCTACGAGT	10	endothelial.cell.of.artery
10X_P7_14_AGGCCACTCTACTTAC	6	CD8.positive..alpha.beta.T.cell
10X_P7_14_AGGCCGTAGAACTGTA	5	skeletal.muscle.satellite.cell
10X_P7_14_AGGCCGTAGCTAGCCC	16	skeletal.muscle.fibroblast..fibroblast
10X_P7_14_AGGCCGTCAATGAAAC	14	tendon.cell
10X_P7_14_AGGCCGTCACTCGACG	2	macrophage
10X_P7_14_AGGCCGTGTCTAGAGG	7	B.cell
10X_P7_14_AGGCCGTTCTATCGCC	2	macrophage
10X_P7_14_AGGGAGTCAACACCCG	6	CD8.positive..alpha.beta.T.cell
10X_P7_14_AGGGAGTCAACCGCCA	7	B.cell
10X_P7_14_AGGGAGTCACAAGTAA	3	monocyte.derived.dendritic.cell
10X_P7_14_AGGGAGTGTACAGTGG	14	tendon.cell
10X_P7_14_AGGGAGTTCCGAGCCA	5	skeletal.muscle.satellite.cell
10X_P7_14_AGGGAGTTCGATGAGG	9	vein.endothelial.cell..endothelial.stalk.cell
10X_P7_14_AGGGATGCAGCGAACA	3	monocyte.derived.dendritic.cell
10X_P7_14_AGGGATGTCATCATTC	15	stromal.cell
10X_P7_14_AGGGTGAAGCTAGTTC	7	B.cell
10X_P7_14_AGGGTGAAGGCTCATT	16	skeletal.muscle.fibroblast..fibroblast
10X_P7_14_AGGGTGACATACTACG	7	B.cell
10X_P7_14_AGGGTGAGTCTCACCT	7	B.cell
10X_P7_14_AGGGTGATCAATCTCT	16	skeletal.muscle.fibroblast..fibroblast
10X_P7_14_AGGGTGATCTCTGTCG	14	tendon.cell
10X_P7_14_AGGTCATAGCAACGGT	7	B.cell
10X_P7_14_AGGTCATCAGGGTACA	1	striated.muscle.cell
10X_P7_14_AGGTCATGTCCGAACC	11	capillary.endothelial.cell
10X_P7_14_AGGTCATTCCGTAGGC	14	tendon.cell
10X_P7_14_AGGTCCGCAATGAAAC	6	CD8.positive..alpha.beta.T.cell
10X_P7_14_AGGTCCGCATCATCCC	7	B.cell
10X_P7_14_AGGTCCGGTAAACGCG	16	skeletal.muscle.fibroblast..fibroblast
10X_P7_14_AGGTCCGGTAGCCTAT	13	pericyte.cell
10X_P7_14_AGGTCCGGTCACTGGC	11	capillary.endothelial.cell
10X_P7_14_AGGTCCGGTCTAGTCA	13	pericyte.cell
10X_P7_14_AGGTCCGTCAGGATCT	16	skeletal.muscle.fibroblast..fibroblast
10X_P7_14_AGTAGTCAGACCACGA	12	blood.vessel.endothelial.cell
10X_P7_14_AGTAGTCAGTGGTAAT	16	skeletal.muscle.fibroblast..fibroblast
10X_P7_14_AGTAGTCCATGAACCT	7	B.cell
10X_P7_14_AGTAGTCGTAGGGACT	5	skeletal.muscle.satellite.cell
10X_P7_14_AGTAGTCGTTTGGGCC	7	B.cell
10X_P7_14_AGTCTTTAGCCAGGAT	9	vein.endothelial.cell..endothelial.stalk.cell
10X_P7_14_AGTCTTTAGTGAACAT	16	skeletal.muscle.fibroblast..fibroblast
10X_P7_14_AGTCTTTAGTGGTCCC	6	CD8.positive..alpha.beta.T.cell
10X_P7_14_AGTCTTTAGTTAGGTA	16	skeletal.muscle.fibroblast..fibroblast
10X_P7_14_AGTCTTTCAAACCCAT	6	CD8.positive..alpha.beta.T.cell
10X_P7_14_AGTCTTTCACCCAGTG	11	capillary.endothelial.cell
10X_P7_14_AGTCTTTGTGTCCTCT	6	CD8.positive..alpha.beta.T.cell
10X_P7_14_AGTCTTTTCAAACCAC	13	pericyte.cell
10X_P7_14_AGTGAGGAGATGCCTT	16	skeletal.muscle.fibroblast..fibroblast
10X_P7_14_AGTGAGGCACCTCGTT	10	endothelial.cell.of.artery
10X_P7_14_AGTGAGGGTCAGAAGC	16	skeletal.muscle.fibroblast..fibroblast
10X_P7_14_AGTGAGGGTCTGGAGA	16	skeletal.muscle.fibroblast..fibroblast
10X_P7_14_AGTGGGAGTTGGTTTG	7	B.cell
10X_P7_14_AGTGTCACAAGCTGTT	2	macrophage
10X_P7_14_AGTGTCATCCACGTTC	16	skeletal.muscle.fibroblast..fibroblast
10X_P7_14_AGTGTCATCGTAGGAG	2	macrophage
10X_P7_14_AGTTGGTAGGAGCGAG	12	blood.vessel.endothelial.cell
10X_P7_14_AGTTGGTCACCCAGTG	16	skeletal.muscle.fibroblast..fibroblast
10X_P7_14_AGTTGGTCATGGTAGG	10	endothelial.cell.of.artery
10X_P7_14_AGTTGGTTCGAGAACG	6	CD8.positive..alpha.beta.T.cell
10X_P7_14_ATAACGCAGAGGTAGA	11	capillary.endothelial.cell
10X_P7_14_ATAACGCAGCGTGTCC	4	T.helper.17.cell
10X_P7_14_ATAACGCAGCTCAACT	16	skeletal.muscle.fibroblast..fibroblast
10X_P7_14_ATAACGCAGGCAGGTT	11	capillary.endothelial.cell
10X_P7_14_ATAACGCCAGTGAGTG	16	skeletal.muscle.fibroblast..fibroblast
10X_P7_14_ATAACGCGTTACCAGT	8	endothelial.cell.of.lymphatic.vessel
10X_P7_14_ATAACGCTCGTGGTCG	7	B.cell
10X_P7_14_ATAAGAGAGCTAGCCC	6	CD8.positive..alpha.beta.T.cell
10X_P7_14_ATAAGAGCACGTAAGG	7	B.cell
10X_P7_14_ATAAGAGGTCTACCTC	6	CD8.positive..alpha.beta.T.cell
10X_P7_14_ATAGACCAGTGGGATC	19	smooth.muscle.cell
10X_P7_14_ATAGACCTCCTTGACC	7	B.cell
10X_P7_14_ATCACGAAGAAGAAGC	14	tendon.cell
10X_P7_14_ATCACGAAGACCCACC	3	monocyte.derived.dendritic.cell
10X_P7_14_ATCACGAAGTGATCGG	11	capillary.endothelial.cell
10X_P7_14_ATCACGACAAGGGTCA	11	capillary.endothelial.cell
10X_P7_14_ATCACGAGTTTGTGTG	16	skeletal.muscle.fibroblast..fibroblast
10X_P7_14_ATCACGATCGCATGAT	16	skeletal.muscle.fibroblast..fibroblast
10X_P7_14_ATCATCTAGGTACTCT	12	blood.vessel.endothelial.cell
10X_P7_14_ATCATCTAGTGAATTG	16	skeletal.muscle.fibroblast..fibroblast
10X_P7_14_ATCATCTCACAGACTT	3	monocyte.derived.dendritic.cell
10X_P7_14_ATCATCTCACAGGCCT	11	capillary.endothelial.cell
10X_P7_14_ATCATCTGTTAAAGTG	12	blood.vessel.endothelial.cell
10X_P7_14_ATCATGGGTACGCACC	16	skeletal.muscle.fibroblast..fibroblast
10X_P7_14_ATCATGGGTATCACCA	6	CD8.positive..alpha.beta.T.cell
10X_P7_14_ATCATGGGTATTACCG	14	tendon.cell
10X_P7_14_ATCATGGGTCTGCAAT	3	monocyte.derived.dendritic.cell
10X_P7_14_ATCATGGTCAAGGTAA	12	blood.vessel.endothelial.cell
10X_P7_14_ATCATGGTCATGCTCC	6	CD8.positive..alpha.beta.T.cell
10X_P7_14_ATCATGGTCGCATGAT	5	skeletal.muscle.satellite.cell
10X_P7_14_ATCCACCAGTGACTCT	3	monocyte.derived.dendritic.cell
10X_P7_14_ATCCACCAGTGTCCCG	14	tendon.cell
10X_P7_14_ATCCACCCAAGTTAAG	7	B.cell
10X_P7_14_ATCCACCCAATCGGTT	7	B.cell
10X_P7_14_ATCCACCGTAGGCTGA	7	B.cell
10X_P7_14_ATCCACCGTCAGCTAT	13	pericyte.cell
10X_P7_14_ATCCACCGTGTTGGGA	13	pericyte.cell
10X_P7_14_ATCCACCGTTATGTGC	15	stromal.cell
10X_P7_14_ATCCGAAAGATGCCTT	5	skeletal.muscle.satellite.cell
10X_P7_14_ATCCGAAAGCGTTTAC	16	skeletal.muscle.fibroblast..fibroblast
10X_P7_14_ATCCGAATCATGGTCA	3	monocyte.derived.dendritic.cell
10X_P7_14_ATCCGAATCTGAGTGT	11	capillary.endothelial.cell
10X_P7_14_ATCGAGTAGTTACCCA	11	capillary.endothelial.cell
10X_P7_14_ATCGAGTCAATCTACG	3	monocyte.derived.dendritic.cell
10X_P7_14_ATCGAGTCACGGTAAG	5	skeletal.muscle.satellite.cell
10X_P7_14_ATCGAGTCAGCCAATT	7	B.cell
10X_P7_14_ATCGAGTCAGGAATGC	16	skeletal.muscle.fibroblast..fibroblast
10X_P7_14_ATCGAGTGTGCCTTGG	14	tendon.cell
10X_P7_14_ATCGAGTTCACGCGGT	5	skeletal.muscle.satellite.cell
10X_P7_14_ATCTACTAGGGTTTCT	11	capillary.endothelial.cell
10X_P7_14_ATCTACTGTGAGGGTT	16	skeletal.muscle.fibroblast..fibroblast
10X_P7_14_ATCTACTTCAACGCTA	3	monocyte.derived.dendritic.cell
10X_P7_14_ATCTACTTCACCGTAA	7	B.cell
10X_P7_14_ATCTGCCAGCGGATCA	16	skeletal.muscle.fibroblast..fibroblast
10X_P7_14_ATCTGCCCACGAGGTA	2	macrophage
10X_P7_14_ATCTGCCCACGGATAG	11	capillary.endothelial.cell
10X_P7_14_ATCTGCCGTCAGATAA	17	skeletal.muscle.fibroblast..fibroblast.1
10X_P7_14_ATCTGCCGTGCACCAC	11	capillary.endothelial.cell
10X_P7_14_ATCTGCCGTTCAGTAC	7	B.cell
10X_P7_14_ATCTGCCGTTGAGTTC	11	capillary.endothelial.cell
10X_P7_14_ATCTGCCTCACCTTAT	14	tendon.cell
10X_P7_14_ATGAGGGAGGCTATCT	3	monocyte.derived.dendritic.cell
10X_P7_14_ATGAGGGAGTACCGGA	14	tendon.cell
10X_P7_14_ATGAGGGCATAGAAAC	7	B.cell
10X_P7_14_ATGAGGGTCAGCAACT	16	skeletal.muscle.fibroblast..fibroblast
10X_P7_14_ATGAGGGTCGCCCTTA	16	skeletal.muscle.fibroblast..fibroblast
10X_P7_14_ATGCGATTCAGGTAAA	6	CD8.positive..alpha.beta.T.cell
10X_P7_14_ATGCGATTCCACGTGG	16	skeletal.muscle.fibroblast..fibroblast
10X_P7_14_ATGCGATTCCTATTCA	14	tendon.cell
10X_P7_14_ATGCGATTCTCTGAGA	7	B.cell
10X_P7_14_ATGCGATTCTGCTGCT	5	skeletal.muscle.satellite.cell
10X_P7_14_ATGGGAGAGATGTTAG	16	skeletal.muscle.fibroblast..fibroblast
10X_P7_14_ATGGGAGAGCAACGGT	11	capillary.endothelial.cell
10X_P7_14_ATGGGAGAGCTGATAA	5	skeletal.muscle.satellite.cell
10X_P7_14_ATGGGAGAGGTGACCA	14	tendon.cell
10X_P7_14_ATGGGAGCAAGGTGTG	16	skeletal.muscle.fibroblast..fibroblast
10X_P7_14_ATGGGAGGTTCGTCTC	3	monocyte.derived.dendritic.cell
10X_P7_14_ATGGGAGTCAAGAAGT	11	capillary.endothelial.cell
10X_P7_14_ATGGGAGTCTGCAAGT	14	tendon.cell
10X_P7_14_ATGTGTGCAGATGAGC	11	capillary.endothelial.cell
10X_P7_14_ATGTGTGTCTCGAGTA	11	capillary.endothelial.cell
10X_P7_14_ATTACTCAGAGCCTAG	7	B.cell
10X_P7_14_ATTACTCCAGACGCTC	19	smooth.muscle.cell
10X_P7_14_ATTACTCCAGCTCGCA	16	skeletal.muscle.fibroblast..fibroblast
10X_P7_14_ATTACTCGTCGAATCT	6	CD8.positive..alpha.beta.T.cell
10X_P7_14_ATTACTCTCGCAAACT	8	endothelial.cell.of.lymphatic.vessel
10X_P7_14_ATTATCCAGGGTTTCT	11	capillary.endothelial.cell
10X_P7_14_ATTATCCAGGTACTCT	10	endothelial.cell.of.artery
10X_P7_14_ATTATCCAGTCAAGGC	16	skeletal.muscle.fibroblast..fibroblast
10X_P7_14_ATTATCCCATAAGACA	6	CD8.positive..alpha.beta.T.cell
10X_P7_14_ATTATCCGTAAACACA	10	endothelial.cell.of.artery
10X_P7_14_ATTATCCGTTCGCTAA	19	smooth.muscle.cell
10X_P7_14_ATTCTACTCCTTGCCA	13	pericyte.cell
10X_P7_14_ATTGGACCAAGACACG	14	tendon.cell
10X_P7_14_ATTGGACGTTAAAGTG	11	capillary.endothelial.cell
10X_P7_14_ATTGGACGTTCAGCGC	6	CD8.positive..alpha.beta.T.cell
10X_P7_14_ATTGGACTCACCGGGT	12	blood.vessel.endothelial.cell
10X_P7_14_ATTGGTGGTTCAGACT	18	myelinating.Schwann.cell
10X_P7_14_ATTGGTGTCCAAATGC	6	CD8.positive..alpha.beta.T.cell
10X_P7_14_ATTGGTGTCTAACTTC	7	B.cell
10X_P7_14_ATTGGTGTCTGGAGCC	16	skeletal.muscle.fibroblast..fibroblast
10X_P7_14_ATTTCTGAGATGGGTC	9	vein.endothelial.cell..endothelial.stalk.cell
10X_P7_14_ATTTCTGAGTGGACGT	11	capillary.endothelial.cell
10X_P7_14_ATTTCTGCAGCTTCGG	16	skeletal.muscle.fibroblast..fibroblast
10X_P7_14_ATTTCTGGTCGCATAT	16	skeletal.muscle.fibroblast..fibroblast
10X_P7_14_ATTTCTGGTGACCAAG	16	skeletal.muscle.fibroblast..fibroblast
10X_P7_14_ATTTCTGTCGCATGGC	5	skeletal.muscle.satellite.cell
10X_P7_14_CAACCAAAGATGTTAG	11	capillary.endothelial.cell
10X_P7_14_CAACCAACACGGTAGA	6	CD8.positive..alpha.beta.T.cell
10X_P7_14_CAACCAACAGTACACT	11	capillary.endothelial.cell
10X_P7_14_CAACCAAGTCTTCGTC	12	blood.vessel.endothelial.cell
10X_P7_14_CAACCAAGTGATGCCC	6	CD8.positive..alpha.beta.T.cell
10X_P7_14_CAACCAAGTTAAGAAC	16	skeletal.muscle.fibroblast..fibroblast
10X_P7_14_CAACCAATCAAACCAC	16	skeletal.muscle.fibroblast..fibroblast
10X_P7_14_CAACCAATCCTCATTA	7	B.cell
10X_P7_14_CAACCTCAGAACAATC	12	blood.vessel.endothelial.cell
10X_P7_14_CAACCTCAGGACACCA	7	B.cell
10X_P7_14_CAACCTCCAAGTTGTC	15	stromal.cell
10X_P7_14_CAACCTCCATAACCTG	5	skeletal.muscle.satellite.cell
10X_P7_14_CAACCTCGTCAAGCGA	16	skeletal.muscle.fibroblast..fibroblast
10X_P7_14_CAACCTCGTGAGCGAT	16	skeletal.muscle.fibroblast..fibroblast
10X_P7_14_CAACTAGCACAGGAGT	14	tendon.cell
10X_P7_14_CAACTAGGTCACTGGC	14	tendon.cell
10X_P7_14_CAACTAGGTTGTGGAG	7	B.cell
10X_P7_14_CAAGAAAAGGGTATCG	17	skeletal.muscle.fibroblast..fibroblast.1
10X_P7_14_CAAGAAACACCCAGTG	2	macrophage
10X_P7_14_CAAGAAACAGCTGTTA	12	blood.vessel.endothelial.cell
10X_P7_14_CAAGAAATCAAACCGT	5	skeletal.muscle.satellite.cell
10X_P7_14_CAAGAAATCCTACAGA	6	CD8.positive..alpha.beta.T.cell
10X_P7_14_CAAGAAATCTATCCCG	5	skeletal.muscle.satellite.cell
10X_P7_14_CAAGAAATCTGGTGTA	16	skeletal.muscle.fibroblast..fibroblast
10X_P7_14_CAAGATCAGTGCGATG	12	blood.vessel.endothelial.cell
10X_P7_14_CAAGATCCATTGGCGC	13	pericyte.cell
10X_P7_14_CAAGATCGTCGACTGC	11	capillary.endothelial.cell
10X_P7_14_CAAGATCGTTACAGAA	16	skeletal.muscle.fibroblast..fibroblast
10X_P7_14_CAAGGCCCATCCCATC	11	capillary.endothelial.cell
10X_P7_14_CAAGGCCGTTCAACCA	12	blood.vessel.endothelial.cell
10X_P7_14_CAAGGCCTCTTGTCAT	7	B.cell
10X_P7_14_CAAGTTGAGAAGGGTA	16	skeletal.muscle.fibroblast..fibroblast
10X_P7_14_CAAGTTGAGGCGACAT	11	capillary.endothelial.cell
10X_P7_14_CAAGTTGCAATCACAC	11	capillary.endothelial.cell
10X_P7_14_CAAGTTGGTAATTGGA	17	skeletal.muscle.fibroblast..fibroblast.1
10X_P7_14_CAAGTTGGTCGTGGCT	16	skeletal.muscle.fibroblast..fibroblast
10X_P7_14_CAAGTTGTCCGCATCT	16	skeletal.muscle.fibroblast..fibroblast
10X_P7_14_CAAGTTGTCTTGACGA	7	B.cell
10X_P7_14_CACAAACGTGTGCGTC	12	blood.vessel.endothelial.cell
10X_P7_14_CACAAACTCGGACAAG	14	tendon.cell
10X_P7_14_CACACAACAAGCCTAT	16	skeletal.muscle.fibroblast..fibroblast
10X_P7_14_CACACCTGTTCAGCGC	11	capillary.endothelial.cell
10X_P7_14_CACACCTGTTGACGTT	11	capillary.endothelial.cell
10X_P7_14_CACACCTTCACCCGAG	11	capillary.endothelial.cell
10X_P7_14_CACACTCAGTTCGCGC	12	blood.vessel.endothelial.cell
10X_P7_14_CACACTCGTCGACTAT	7	B.cell
10X_P7_14_CACACTCGTGGTCTCG	16	skeletal.muscle.fibroblast..fibroblast
10X_P7_14_CACACTCGTGTTTGTG	13	pericyte.cell
10X_P7_14_CACACTCTCCCTGACT	6	CD8.positive..alpha.beta.T.cell
10X_P7_14_CACACTCTCCGATATG	6	CD8.positive..alpha.beta.T.cell
10X_P7_14_CACACTCTCGCTTAGA	5	skeletal.muscle.satellite.cell
10X_P7_14_CACAGGCAGTAGTGCG	14	tendon.cell
10X_P7_14_CACAGGCCAAGGTTTC	11	capillary.endothelial.cell
10X_P7_14_CACAGGCGTACGCTGC	13	pericyte.cell
10X_P7_14_CACAGGCTCAAGCCTA	10	endothelial.cell.of.artery
10X_P7_14_CACAGGCTCATTGCCC	12	blood.vessel.endothelial.cell
10X_P7_14_CACAGGCTCGAATCCA	11	capillary.endothelial.cell
10X_P7_14_CACAGTACATCGACGC	7	B.cell
10X_P7_14_CACAGTAGTAAGGGCT	16	skeletal.muscle.fibroblast..fibroblast
10X_P7_14_CACAGTAGTCTGATCA	16	skeletal.muscle.fibroblast..fibroblast
10X_P7_14_CACAGTATCGGCATCG	11	capillary.endothelial.cell
10X_P7_14_CACAGTATCTCATTCA	5	skeletal.muscle.satellite.cell
10X_P7_14_CACATAGAGCTTATCG	16	skeletal.muscle.fibroblast..fibroblast
10X_P7_14_CACATTTAGAGTCGGT	10	endothelial.cell.of.artery
10X_P7_14_CACATTTCAAGCGATG	7	B.cell
10X_P7_14_CACATTTCATATGGTC	16	skeletal.muscle.fibroblast..fibroblast
10X_P7_14_CACATTTCATGGTTGT	7	B.cell
10X_P7_14_CACATTTGTGCCTGCA	12	blood.vessel.endothelial.cell
10X_P7_14_CACATTTGTTCCCTTG	11	capillary.endothelial.cell
10X_P7_14_CACCACTAGCGTGAAC	17	skeletal.muscle.fibroblast..fibroblast.1
10X_P7_14_CACCACTAGTCATCCA	13	pericyte.cell
10X_P7_14_CACCACTAGTCCATAC	5	skeletal.muscle.satellite.cell
10X_P7_14_CACCACTAGTCTCGGC	17	skeletal.muscle.fibroblast..fibroblast.1
10X_P7_14_CACCACTAGTGTACGG	14	tendon.cell
10X_P7_14_CACCACTCACGTGAGA	6	CD8.positive..alpha.beta.T.cell
10X_P7_14_CACCACTCAGACGCTC	10	endothelial.cell.of.artery
10X_P7_14_CACCACTCAGCTCGAC	17	skeletal.muscle.fibroblast..fibroblast.1
10X_P7_14_CACCACTGTATGAAAC	7	B.cell
10X_P7_14_CACCACTTCCCTAACC	7	B.cell
10X_P7_14_CACCACTTCCGATATG	9	vein.endothelial.cell..endothelial.stalk.cell
10X_P7_14_CACCACTTCGTTGACA	4	T.helper.17.cell
10X_P7_14_CACCAGGCACGGTGTC	10	endothelial.cell.of.artery
10X_P7_14_CACCAGGTCAAAGACA	2	macrophage
10X_P7_14_CACCTTGAGAGGTAGA	7	B.cell
10X_P7_14_CACCTTGAGCGTTTAC	16	skeletal.muscle.fibroblast..fibroblast
10X_P7_14_CACCTTGAGGACCACA	11	capillary.endothelial.cell
10X_P7_14_CACCTTGAGGATCGCA	16	skeletal.muscle.fibroblast..fibroblast
10X_P7_14_CACCTTGAGGGATCTG	16	skeletal.muscle.fibroblast..fibroblast
10X_P7_14_CACCTTGAGGTGCACA	14	tendon.cell
10X_P7_14_CACCTTGGTAGATTAG	7	B.cell
10X_P7_14_CACCTTGGTCACTTCC	16	skeletal.muscle.fibroblast..fibroblast
10X_P7_14_CACTCCAAGTGGCACA	3	monocyte.derived.dendritic.cell
10X_P7_14_CACTCCACAGCTGTGC	14	tendon.cell
10X_P7_14_CACTCCAGTCAGTGGA	7	B.cell
10X_P7_14_CACTCCAGTGACTCAT	11	capillary.endothelial.cell
10X_P7_14_CACTCCATCACCCGAG	9	vein.endothelial.cell..endothelial.stalk.cell
10X_P7_14_CACTCCATCAGCACAT	12	blood.vessel.endothelial.cell
10X_P7_14_CAGAATCAGAGCTGCA	14	tendon.cell
10X_P7_14_CAGAATCCAATAGCGG	2	macrophage
10X_P7_14_CAGAATCCAGCGAACA	7	B.cell
10X_P7_14_CAGAGAGAGGGATGGG	8	endothelial.cell.of.lymphatic.vessel
10X_P7_14_CAGAGAGCAATGGAGC	9	vein.endothelial.cell..endothelial.stalk.cell
10X_P7_14_CAGAGAGCAGATGGCA	7	B.cell
10X_P7_14_CAGAGAGTCATGTCCC	7	B.cell
10X_P7_14_CAGAGAGTCGAACGGA	16	skeletal.muscle.fibroblast..fibroblast
10X_P7_14_CAGAGAGTCTGAGTGT	14	tendon.cell
10X_P7_14_CAGATCAAGCCACCTG	11	capillary.endothelial.cell
10X_P7_14_CAGATCACAGCTTCGG	7	B.cell
10X_P7_14_CAGATCAGTCAGAAGC	9	vein.endothelial.cell..endothelial.stalk.cell
10X_P7_14_CAGATCAGTCGGCATC	9	vein.endothelial.cell..endothelial.stalk.cell
10X_P7_14_CAGATCATCAGTCCCT	12	blood.vessel.endothelial.cell
10X_P7_14_CAGATCATCTGGTTCC	7	B.cell
10X_P7_14_CAGATCATCTTCAACT	11	capillary.endothelial.cell
10X_P7_14_CAGCAGCAGGATGGTC	14	tendon.cell
10X_P7_14_CAGCAGCCACGGTGTC	5	skeletal.muscle.satellite.cell
10X_P7_14_CAGCAGCCAGGACCCT	12	blood.vessel.endothelial.cell
10X_P7_14_CAGCAGCGTGTGAATA	16	skeletal.muscle.fibroblast..fibroblast
10X_P7_14_CAGCAGCTCATGGTCA	7	B.cell
10X_P7_14_CAGCAGCTCCAATGGT	5	skeletal.muscle.satellite.cell
10X_P7_14_CAGCATAAGCTCTCGG	3	monocyte.derived.dendritic.cell
10X_P7_14_CAGCATAAGGAATCGC	14	tendon.cell
10X_P7_14_CAGCATAAGGAGCGAG	17	skeletal.muscle.fibroblast..fibroblast.1
10X_P7_14_CAGCATAAGGTGCAAC	14	tendon.cell
10X_P7_14_CAGCATACAGGACCCT	12	blood.vessel.endothelial.cell
10X_P7_14_CAGCATACAGTTCCCT	16	skeletal.muscle.fibroblast..fibroblast
10X_P7_14_CAGCATATCGCAGGCT	14	tendon.cell
10X_P7_14_CAGCCGAAGATCTGCT	3	monocyte.derived.dendritic.cell
10X_P7_14_CAGCCGAAGGACTGGT	3	monocyte.derived.dendritic.cell
10X_P7_14_CAGCCGAAGTGGGATC	11	capillary.endothelial.cell
10X_P7_14_CAGCCGACAAATACAG	17	skeletal.muscle.fibroblast..fibroblast.1
10X_P7_14_CAGCCGAGTCTCCATC	14	tendon.cell
10X_P7_14_CAGCCGATCATTGCGA	11	capillary.endothelial.cell
10X_P7_14_CAGCCGATCCTGTACC	7	B.cell
10X_P7_14_CAGCGACAGAGGGCTT	16	skeletal.muscle.fibroblast..fibroblast
10X_P7_14_CAGCGACAGATAGGAG	6	CD8.positive..alpha.beta.T.cell
10X_P7_14_CAGCGACAGATAGTCA	14	tendon.cell
10X_P7_14_CAGCGACAGCGTTTAC	14	tendon.cell
10X_P7_14_CAGCGACCAAGCGCTC	16	skeletal.muscle.fibroblast..fibroblast
10X_P7_14_CAGCGACCACTGTCGG	16	skeletal.muscle.fibroblast..fibroblast
10X_P7_14_CAGCGACCAGGGATTG	16	skeletal.muscle.fibroblast..fibroblast
10X_P7_14_CAGCGACGTGTGACCC	7	B.cell
10X_P7_14_CAGCGACTCAACACCA	11	capillary.endothelial.cell
10X_P7_14_CAGCTAAAGAGTAAGG	14	tendon.cell
10X_P7_14_CAGCTAAGTCGGCACT	11	capillary.endothelial.cell
10X_P7_14_CAGCTGGCACAACTGT	7	B.cell
10X_P7_14_CAGCTGGCATGCTGGC	16	skeletal.muscle.fibroblast..fibroblast
10X_P7_14_CAGCTGGGTTCCACTC	7	B.cell
10X_P7_14_CAGCTGGTCAAGCCTA	7	B.cell
10X_P7_14_CAGCTGGTCAGAGACG	16	skeletal.muscle.fibroblast..fibroblast
10X_P7_14_CAGCTGGTCCTGCCAT	10	endothelial.cell.of.artery
10X_P7_14_CAGCTGGTCGAATCCA	10	endothelial.cell.of.artery
10X_P7_14_CAGGTGCAGGCAAAGA	11	capillary.endothelial.cell
10X_P7_14_CAGGTGCCAAACTGTC	5	skeletal.muscle.satellite.cell
10X_P7_14_CAGGTGCGTGATAAAC	16	skeletal.muscle.fibroblast..fibroblast
10X_P7_14_CAGGTGCTCCTAGGGC	9	vein.endothelial.cell..endothelial.stalk.cell
10X_P7_14_CAGTAACAGACGCAAC	7	B.cell
10X_P7_14_CAGTAACAGCTCCTTC	18	myelinating.Schwann.cell
10X_P7_14_CAGTAACGTCTGATCA	11	capillary.endothelial.cell
10X_P7_14_CAGTAACTCACCGGGT	9	vein.endothelial.cell..endothelial.stalk.cell
10X_P7_14_CAGTCCTAGAAGGGTA	17	skeletal.muscle.fibroblast..fibroblast.1
10X_P7_14_CAGTCCTGTGTGACCC	9	vein.endothelial.cell..endothelial.stalk.cell
10X_P7_14_CAGTCCTTCAGCATGT	7	B.cell
10X_P7_14_CAGTCCTTCAGCTCGG	16	skeletal.muscle.fibroblast..fibroblast
10X_P7_14_CAGTCCTTCCTTGGTC	17	skeletal.muscle.fibroblast..fibroblast.1
10X_P7_14_CATATGGAGAAACCTA	11	capillary.endothelial.cell
10X_P7_14_CATATGGAGGTGGGTT	12	blood.vessel.endothelial.cell
10X_P7_14_CATATGGGTAACGCGA	11	capillary.endothelial.cell
10X_P7_14_CATATGGGTTGTACAC	11	capillary.endothelial.cell
10X_P7_14_CATATTCAGTTGTCGT	2	macrophage
10X_P7_14_CATATTCCAATGGACG	6	CD8.positive..alpha.beta.T.cell
10X_P7_14_CATATTCCAGGGATTG	11	capillary.endothelial.cell
10X_P7_14_CATATTCGTGATGTGG	11	capillary.endothelial.cell
10X_P7_14_CATATTCTCGATAGAA	16	skeletal.muscle.fibroblast..fibroblast
10X_P7_14_CATCAAGGTAGGCTGA	16	skeletal.muscle.fibroblast..fibroblast
10X_P7_14_CATCAAGTCAGGCAAG	11	capillary.endothelial.cell
10X_P7_14_CATCAGAAGGTGATAT	6	CD8.positive..alpha.beta.T.cell
10X_P7_14_CATCAGACAGACGCTC	10	endothelial.cell.of.artery
10X_P7_14_CATCAGAGTCTAGAGG	11	capillary.endothelial.cell
10X_P7_14_CATCAGATCAGCAACT	2	macrophage
10X_P7_14_CATCAGATCGGTTCGG	13	pericyte.cell
10X_P7_14_CATCCACCACATCTTT	15	stromal.cell
10X_P7_14_CATCCACGTACAGTTC	5	skeletal.muscle.satellite.cell
10X_P7_14_CATCCACGTATGGTTC	7	B.cell
10X_P7_14_CATCCACGTCCAAGTT	2	macrophage
10X_P7_14_CATCCACGTCCGTCAG	5	skeletal.muscle.satellite.cell
10X_P7_14_CATCCACTCTGGGCCA	7	B.cell
10X_P7_14_CATCGAAGTGGACGAT	5	skeletal.muscle.satellite.cell
10X_P7_14_CATCGAAGTTTAGGAA	16	skeletal.muscle.fibroblast..fibroblast
10X_P7_14_CATCGAATCAAGGTAA	16	skeletal.muscle.fibroblast..fibroblast
10X_P7_14_CATCGAATCATCGATG	16	skeletal.muscle.fibroblast..fibroblast
10X_P7_14_CATCGGGCATCTATGG	5	skeletal.muscle.satellite.cell
10X_P7_14_CATCGGGCATTGTGCA	11	capillary.endothelial.cell
10X_P7_14_CATGACAGTTATTCTC	4	T.helper.17.cell
10X_P7_14_CATGACATCTGAGTGT	14	tendon.cell
10X_P7_14_CATGCCTAGGATGCGT	8	endothelial.cell.of.lymphatic.vessel
10X_P7_14_CATGCCTCAACTGCTA	14	tendon.cell
10X_P7_14_CATGCCTCATCAGTCA	7	B.cell
10X_P7_14_CATGCCTCATCTCCCA	17	skeletal.muscle.fibroblast..fibroblast.1
10X_P7_14_CATGCCTGTCCGAATT	16	skeletal.muscle.fibroblast..fibroblast
10X_P7_14_CATGGCGAGACAATAC	14	tendon.cell
10X_P7_14_CATGGCGAGGCGACAT	11	capillary.endothelial.cell
10X_P7_14_CATGGCGCAATAACGA	9	vein.endothelial.cell..endothelial.stalk.cell
10X_P7_14_CATGGCGCACAACGTT	16	skeletal.muscle.fibroblast..fibroblast
10X_P7_14_CATGGCGGTCTAGCGC	10	endothelial.cell.of.artery
10X_P7_14_CATGGCGTCACTTCAT	10	endothelial.cell.of.artery
10X_P7_14_CATTATCAGCTATGCT	10	endothelial.cell.of.artery
10X_P7_14_CATTATCAGCTTTGGT	6	CD8.positive..alpha.beta.T.cell
10X_P7_14_CATTATCAGGCCCGTT	11	capillary.endothelial.cell
10X_P7_14_CATTATCCATTGGGCC	12	blood.vessel.endothelial.cell
10X_P7_14_CATTATCGTTATGTGC	6	CD8.positive..alpha.beta.T.cell
10X_P7_14_CATTATCTCTCTAGGA	12	blood.vessel.endothelial.cell
10X_P7_14_CATTCGCAGGCTACGA	8	endothelial.cell.of.lymphatic.vessel
10X_P7_14_CATTCGCGTAGGGACT	7	B.cell
10X_P7_14_CCAATCCCACCGAAAG	11	capillary.endothelial.cell
10X_P7_14_CCAATCCGTTCGTCTC	6	CD8.positive..alpha.beta.T.cell
10X_P7_14_CCAATCCTCTCCTATA	9	vein.endothelial.cell..endothelial.stalk.cell
10X_P7_14_CCACCTAAGATCGATA	16	skeletal.muscle.fibroblast..fibroblast
10X_P7_14_CCACCTAAGTGGACGT	17	skeletal.muscle.fibroblast..fibroblast.1
10X_P7_14_CCACCTAAGTGTCCCG	14	tendon.cell
10X_P7_14_CCACCTAGTACTCGCG	12	blood.vessel.endothelial.cell
10X_P7_14_CCACGGAGTACCAGTT	16	skeletal.muscle.fibroblast..fibroblast
10X_P7_14_CCACGGAGTCTCCATC	16	skeletal.muscle.fibroblast..fibroblast
10X_P7_14_CCACGGAGTGGTCTCG	16	skeletal.muscle.fibroblast..fibroblast
10X_P7_14_CCACTACAGAAGGACA	6	CD8.positive..alpha.beta.T.cell
10X_P7_14_CCACTACAGGGAGTAA	5	skeletal.muscle.satellite.cell
10X_P7_14_CCACTACCATTCCTCG	16	skeletal.muscle.fibroblast..fibroblast
10X_P7_14_CCACTACGTCTCACCT	1	striated.muscle.cell
10X_P7_14_CCAGCGAAGCATGGCA	12	blood.vessel.endothelial.cell
10X_P7_14_CCAGCGACAACTGCGC	15	stromal.cell
10X_P7_14_CCAGCGACAGGATCGA	16	skeletal.muscle.fibroblast..fibroblast
10X_P7_14_CCAGCGACATCACAAC	12	blood.vessel.endothelial.cell
10X_P7_14_CCAGCGATCACTCCTG	11	capillary.endothelial.cell
10X_P7_14_CCAGCGATCAGGTTCA	17	skeletal.muscle.fibroblast..fibroblast.1
10X_P7_14_CCATGTCAGATGTGTA	16	skeletal.muscle.fibroblast..fibroblast
10X_P7_14_CCATGTCAGCATGGCA	3	monocyte.derived.dendritic.cell
10X_P7_14_CCATGTCAGCCAGGAT	7	B.cell
10X_P7_14_CCATGTCAGCTCTCGG	7	B.cell
10X_P7_14_CCATGTCAGTGGAGAA	12	blood.vessel.endothelial.cell
10X_P7_14_CCATGTCGTAGCGTCC	16	skeletal.muscle.fibroblast..fibroblast
10X_P7_14_CCATGTCGTCAGGACA	7	B.cell
10X_P7_14_CCATTCGGTCGTCTTC	16	skeletal.muscle.fibroblast..fibroblast
10X_P7_14_CCATTCGTCACGATGT	16	skeletal.muscle.fibroblast..fibroblast
10X_P7_14_CCCAATCAGACTCGGA	16	skeletal.muscle.fibroblast..fibroblast
10X_P7_14_CCCAATCAGTGGACGT	16	skeletal.muscle.fibroblast..fibroblast
10X_P7_14_CCCAATCGTTACGGAG	17	skeletal.muscle.fibroblast..fibroblast.1
10X_P7_14_CCCAGTTCAATGGATA	17	skeletal.muscle.fibroblast..fibroblast.1
10X_P7_14_CCCAGTTCATTAGGCT	5	skeletal.muscle.satellite.cell
10X_P7_14_CCCAGTTCATTTGCTT	5	skeletal.muscle.satellite.cell
10X_P7_14_CCCAGTTGTGGTCCGT	15	stromal.cell
10X_P7_14_CCCAGTTTCAAGAAGT	16	skeletal.muscle.fibroblast..fibroblast
10X_P7_14_CCCATACAGCAGACTG	14	tendon.cell
10X_P7_14_CCCATACAGGTGGGTT	16	skeletal.muscle.fibroblast..fibroblast
10X_P7_14_CCCATACCACTAGTAC	6	CD8.positive..alpha.beta.T.cell
10X_P7_14_CCCATACTCATAGCAC	16	skeletal.muscle.fibroblast..fibroblast
10X_P7_14_CCCATACTCTTGTATC	5	skeletal.muscle.satellite.cell
10X_P7_14_CCCTCCTAGGCATTGG	11	capillary.endothelial.cell
10X_P7_14_CCCTCCTCAACTGCGC	7	B.cell
10X_P7_14_CCCTCCTCAATGTAAG	7	B.cell
10X_P7_14_CCCTCCTCACCTTGTC	16	skeletal.muscle.fibroblast..fibroblast
10X_P7_14_CCCTCCTTCATCTGCC	9	vein.endothelial.cell..endothelial.stalk.cell
10X_P7_14_CCCTCCTTCTCCTATA	7	B.cell
10X_P7_14_CCGGGATAGAATGTGT	7	B.cell
10X_P7_14_CCGGGATAGCGTAGTG	1	striated.muscle.cell
10X_P7_14_CCGGGATAGGCGACAT	6	CD8.positive..alpha.beta.T.cell
10X_P7_14_CCGGTAGAGCCAGTAG	11	capillary.endothelial.cell
10X_P7_14_CCGGTAGCACCACCAG	11	capillary.endothelial.cell
10X_P7_14_CCGGTAGCACTGTTAG	16	skeletal.muscle.fibroblast..fibroblast
10X_P7_14_CCGGTAGCAGACAAAT	5	skeletal.muscle.satellite.cell
10X_P7_14_CCGGTAGGTCGATTGT	9	vein.endothelial.cell..endothelial.stalk.cell
10X_P7_14_CCGGTAGTCTGAGGGA	5	skeletal.muscle.satellite.cell
10X_P7_14_CCGTACTAGTGTTTGC	6	CD8.positive..alpha.beta.T.cell
10X_P7_14_CCGTACTCACCACCAG	17	skeletal.muscle.fibroblast..fibroblast.1
10X_P7_14_CCGTACTCACGAAATA	7	B.cell
10X_P7_14_CCGTACTCATGATCCA	11	capillary.endothelial.cell
10X_P7_14_CCGTACTGTGTTTGGT	16	skeletal.muscle.fibroblast..fibroblast
10X_P7_14_CCGTGGAAGCTATGCT	16	skeletal.muscle.fibroblast..fibroblast
10X_P7_14_CCGTGGAAGGGTTCCC	11	capillary.endothelial.cell
10X_P7_14_CCGTGGACATTCACTT	17	skeletal.muscle.fibroblast..fibroblast.1
10X_P7_14_CCGTGGAGTGAGTGAC	19	smooth.muscle.cell
10X_P7_14_CCGTGGAGTTCGCGAC	9	vein.endothelial.cell..endothelial.stalk.cell
10X_P7_14_CCGTGGATCATGTCTT	2	macrophage
10X_P7_14_CCGTGGATCGGAGCAA	17	skeletal.muscle.fibroblast..fibroblast.1
10X_P7_14_CCGTGGATCTCTAGGA	16	skeletal.muscle.fibroblast..fibroblast
10X_P7_14_CCGTTCAAGACGCAAC	11	capillary.endothelial.cell
10X_P7_14_CCGTTCATCAGCAACT	5	skeletal.muscle.satellite.cell
10X_P7_14_CCGTTCATCCGATATG	14	tendon.cell
10X_P7_14_CCGTTCATCTGGTATG	14	tendon.cell
10X_P7_14_CCTAAAGAGTACACCT	11	capillary.endothelial.cell
10X_P7_14_CCTAAAGCAATACGCT	14	tendon.cell
10X_P7_14_CCTAAAGCACATTTCT	16	skeletal.muscle.fibroblast..fibroblast
10X_P7_14_CCTAAAGCACTTGGAT	6	CD8.positive..alpha.beta.T.cell
10X_P7_14_CCTAAAGGTTCCTCCA	7	B.cell
10X_P7_14_CCTAAAGTCCCGGATG	13	pericyte.cell
10X_P7_14_CCTAAAGTCGGAGGTA	16	skeletal.muscle.fibroblast..fibroblast
10X_P7_14_CCTACACAGTTAAGTG	5	skeletal.muscle.satellite.cell
10X_P7_14_CCTACACCAGTTTACG	7	B.cell
10X_P7_14_CCTACACCATATGCTG	16	skeletal.muscle.fibroblast..fibroblast
10X_P7_14_CCTACACGTCTCGTTC	16	skeletal.muscle.fibroblast..fibroblast
10X_P7_14_CCTACACTCACGAAGG	17	skeletal.muscle.fibroblast..fibroblast.1
10X_P7_14_CCTACCAAGGTAAACT	9	vein.endothelial.cell..endothelial.stalk.cell
10X_P7_14_CCTACCAAGTTACCCA	17	skeletal.muscle.fibroblast..fibroblast.1
10X_P7_14_CCTACCACACACGCTG	8	endothelial.cell.of.lymphatic.vessel
10X_P7_14_CCTACCAGTGTCGCTG	5	skeletal.muscle.satellite.cell
10X_P7_14_CCTAGCTAGATGGCGT	14	tendon.cell
10X_P7_14_CCTAGCTAGCAACGGT	7	B.cell
10X_P7_14_CCTAGCTCAGCTCGCA	11	capillary.endothelial.cell
10X_P7_14_CCTAGCTCAGCTGGCT	13	pericyte.cell
10X_P7_14_CCTAGCTGTCCTGCTT	16	skeletal.muscle.fibroblast..fibroblast
10X_P7_14_CCTAGCTGTCGATTGT	8	endothelial.cell.of.lymphatic.vessel
10X_P7_14_CCTAGCTGTGATGATA	11	capillary.endothelial.cell
10X_P7_14_CCTAGCTTCGTAGATC	6	CD8.positive..alpha.beta.T.cell
10X_P7_14_CCTATTACAGTAAGAT	11	capillary.endothelial.cell
10X_P7_14_CCTATTACATGACATC	7	B.cell
10X_P7_14_CCTCAGTAGGGTGTTG	6	CD8.positive..alpha.beta.T.cell
10X_P7_14_CCTCAGTAGTCATCCA	6	CD8.positive..alpha.beta.T.cell
10X_P7_14_CCTCAGTCAAGACACG	13	pericyte.cell
10X_P7_14_CCTCAGTCATTTCAGG	7	B.cell
10X_P7_14_CCTCAGTGTTTGTGTG	7	B.cell
10X_P7_14_CCTCAGTTCGGAGGTA	9	vein.endothelial.cell..endothelial.stalk.cell
10X_P7_14_CCTCAGTTCTCGCATC	16	skeletal.muscle.fibroblast..fibroblast
10X_P7_14_CCTCTGATCGGATGTT	16	skeletal.muscle.fibroblast..fibroblast
10X_P7_14_CCTCTGATCTCAAACG	16	skeletal.muscle.fibroblast..fibroblast
10X_P7_14_CCTCTGATCTCGCATC	12	blood.vessel.endothelial.cell
10X_P7_14_CCTTACGAGAAGGGTA	16	skeletal.muscle.fibroblast..fibroblast
10X_P7_14_CCTTACGCAACCGCCA	6	CD8.positive..alpha.beta.T.cell
10X_P7_14_CCTTACGCATGGGAAC	12	blood.vessel.endothelial.cell
10X_P7_14_CCTTACGGTACTCGCG	11	capillary.endothelial.cell
10X_P7_14_CCTTACGTCCAGAGGA	12	blood.vessel.endothelial.cell
10X_P7_14_CCTTCCCAGAATTGTG	4	T.helper.17.cell
10X_P7_14_CCTTCCCAGATGTGGC	7	B.cell
10X_P7_14_CCTTCCCAGTGTGGCA	6	CD8.positive..alpha.beta.T.cell
10X_P7_14_CCTTCCCCAACTTGAC	14	tendon.cell
10X_P7_14_CCTTCCCCAAGACGTG	1	striated.muscle.cell
10X_P7_14_CCTTCCCCATTGAGCT	14	tendon.cell
10X_P7_14_CCTTCCCGTCATATCG	14	tendon.cell
10X_P7_14_CCTTCGAAGATATACG	16	skeletal.muscle.fibroblast..fibroblast
10X_P7_14_CCTTCGAAGTCGCCGT	5	skeletal.muscle.satellite.cell
10X_P7_14_CCTTCGACAACGATGG	14	tendon.cell
10X_P7_14_CCTTCGATCGCAAACT	17	skeletal.muscle.fibroblast..fibroblast.1
10X_P7_14_CCTTTCTTCCACGCAG	15	stromal.cell
10X_P7_14_CGAACATAGTATCGAA	13	pericyte.cell
10X_P7_14_CGAACATCATTAGGCT	5	skeletal.muscle.satellite.cell
10X_P7_14_CGAACATGTTCTGGTA	12	blood.vessel.endothelial.cell
10X_P7_14_CGAACATTCATCGCTC	14	tendon.cell
10X_P7_14_CGAACATTCCACGTTC	16	skeletal.muscle.fibroblast..fibroblast
10X_P7_14_CGAATGTAGGCATTGG	16	skeletal.muscle.fibroblast..fibroblast
10X_P7_14_CGAATGTCAATGCCAT	12	blood.vessel.endothelial.cell
10X_P7_14_CGAATGTGTCTAACGT	5	skeletal.muscle.satellite.cell
10X_P7_14_CGAATGTGTTCGCGAC	12	blood.vessel.endothelial.cell
10X_P7_14_CGACCTTAGGCTCTTA	13	pericyte.cell
10X_P7_14_CGACCTTCAATGCCAT	16	skeletal.muscle.fibroblast..fibroblast
10X_P7_14_CGACCTTTCATGTCTT	7	B.cell
10X_P7_14_CGACCTTTCTCAACTT	16	skeletal.muscle.fibroblast..fibroblast
10X_P7_14_CGACTTCAGCCGCCTA	19	smooth.muscle.cell
10X_P7_14_CGACTTCAGTCCAGGA	17	skeletal.muscle.fibroblast..fibroblast.1
10X_P7_14_CGACTTCCAATTCCTT	7	B.cell
10X_P7_14_CGACTTCCACCCAGTG	11	capillary.endothelial.cell
10X_P7_14_CGACTTCCACGTAAGG	2	macrophage
10X_P7_14_CGACTTCGTGGGTCAA	10	endothelial.cell.of.artery
10X_P7_14_CGAGAAGAGACTAAGT	11	capillary.endothelial.cell
10X_P7_14_CGAGAAGCACATCTTT	14	tendon.cell
10X_P7_14_CGAGAAGCAGCATGAG	6	CD8.positive..alpha.beta.T.cell
10X_P7_14_CGAGAAGTCCGAGCCA	12	blood.vessel.endothelial.cell
10X_P7_14_CGAGCACAGGTGCTTT	7	B.cell
10X_P7_14_CGAGCACGTCTCTCGT	5	skeletal.muscle.satellite.cell
10X_P7_14_CGAGCACGTGCCTTGG	14	tendon.cell
10X_P7_14_CGAGCACTCGCGTTTC	6	CD8.positive..alpha.beta.T.cell
10X_P7_14_CGAGCCAAGATCACGG	12	blood.vessel.endothelial.cell
10X_P7_14_CGAGCCAGTAATCACC	16	skeletal.muscle.fibroblast..fibroblast
10X_P7_14_CGAGCCATCTAAGCCA	11	capillary.endothelial.cell
10X_P7_14_CGATCGGAGAGCTGGT	11	capillary.endothelial.cell
10X_P7_14_CGATCGGCATGCCCGA	15	stromal.cell
10X_P7_14_CGATCGGGTGGTCCGT	14	tendon.cell
10X_P7_14_CGATGGCAGCGCTTAT	11	capillary.endothelial.cell
10X_P7_14_CGATGGCCAACGATGG	16	skeletal.muscle.fibroblast..fibroblast
10X_P7_14_CGATGGCCAGCTGCAC	6	CD8.positive..alpha.beta.T.cell
10X_P7_14_CGATGGCCAGTTCCCT	16	skeletal.muscle.fibroblast..fibroblast
10X_P7_14_CGATGGCCATGAACCT	6	CD8.positive..alpha.beta.T.cell
10X_P7_14_CGATGGCGTAGCTTGT	7	B.cell
10X_P7_14_CGATGGCTCAGTTCGA	12	blood.vessel.endothelial.cell
10X_P7_14_CGATGGCTCAGTTTGG	12	blood.vessel.endothelial.cell
10X_P7_14_CGATGGCTCGTATCAG	11	capillary.endothelial.cell
10X_P7_14_CGATGTAAGATCACGG	12	blood.vessel.endothelial.cell
10X_P7_14_CGATGTAAGTAACCCT	11	capillary.endothelial.cell
10X_P7_14_CGATGTACAACGATCT	7	B.cell
10X_P7_14_CGATGTACACTAAGTC	11	capillary.endothelial.cell
10X_P7_14_CGATGTACAGCTATTG	7	B.cell
10X_P7_14_CGATGTAGTAGATTAG	5	skeletal.muscle.satellite.cell
10X_P7_14_CGATGTAGTGTCCTCT	6	CD8.positive..alpha.beta.T.cell
10X_P7_14_CGATGTAGTTCACGGC	10	endothelial.cell.of.artery
10X_P7_14_CGATGTATCACCACCT	11	capillary.endothelial.cell
10X_P7_14_CGATTGAGTAAGAGGA	11	capillary.endothelial.cell
10X_P7_14_CGATTGATCTTGACGA	12	blood.vessel.endothelial.cell
10X_P7_14_CGCCAAGAGTTCCACA	11	capillary.endothelial.cell
10X_P7_14_CGCCAAGTCCTAAGTG	11	capillary.endothelial.cell
10X_P7_14_CGCGGTAAGACTGTAA	17	skeletal.muscle.fibroblast..fibroblast.1
10X_P7_14_CGCGGTAAGCCATCGC	11	capillary.endothelial.cell
10X_P7_14_CGCGGTACAAAGCGGT	13	pericyte.cell
10X_P7_14_CGCGGTACAAGTACCT	14	tendon.cell
10X_P7_14_CGCGGTAGTCTAGTCA	13	pericyte.cell
10X_P7_14_CGCGGTAGTTATGCGT	3	monocyte.derived.dendritic.cell
10X_P7_14_CGCGGTAGTTGCCTCT	16	skeletal.muscle.fibroblast..fibroblast
10X_P7_14_CGCGGTATCACCTTAT	11	capillary.endothelial.cell
10X_P7_14_CGCGTTTAGAGCTGCA	2	macrophage
10X_P7_14_CGCGTTTAGATGGCGT	7	B.cell
10X_P7_14_CGCGTTTCAAGTTCTG	6	CD8.positive..alpha.beta.T.cell
10X_P7_14_CGCGTTTCACGTCTCT	7	B.cell
10X_P7_14_CGCGTTTGTCAGAATA	14	tendon.cell
10X_P7_14_CGCGTTTGTCTCTCGT	16	skeletal.muscle.fibroblast..fibroblast
10X_P7_14_CGCGTTTTCTGCTGTC	16	skeletal.muscle.fibroblast..fibroblast
10X_P7_14_CGCTATCAGAAGATTC	13	pericyte.cell
10X_P7_14_CGCTATCAGACATAAC	16	skeletal.muscle.fibroblast..fibroblast
10X_P7_14_CGCTATCCACAACGTT	7	B.cell
10X_P7_14_CGCTATCGTACAGTTC	16	skeletal.muscle.fibroblast..fibroblast
10X_P7_14_CGCTATCGTACCATCA	11	capillary.endothelial.cell
10X_P7_14_CGCTATCTCTGGAGCC	6	CD8.positive..alpha.beta.T.cell
10X_P7_14_CGCTGGAAGCCAACAG	11	capillary.endothelial.cell
10X_P7_14_CGCTGGAAGTGTTAGA	2	macrophage
10X_P7_14_CGCTGGACAGACGCTC	16	skeletal.muscle.fibroblast..fibroblast
10X_P7_14_CGCTGGACATGTTCCC	6	CD8.positive..alpha.beta.T.cell
10X_P7_14_CGCTGGAGTATAGTAG	16	skeletal.muscle.fibroblast..fibroblast
10X_P7_14_CGCTGGAGTCTCACCT	7	B.cell
10X_P7_14_CGCTGGAGTGTGGTTT	9	vein.endothelial.cell..endothelial.stalk.cell
10X_P7_14_CGCTTCAAGCTTCGCG	9	vein.endothelial.cell..endothelial.stalk.cell
10X_P7_14_CGCTTCAAGTACGATA	16	skeletal.muscle.fibroblast..fibroblast
10X_P7_14_CGCTTCAGTTCATGGT	1	striated.muscle.cell
10X_P7_14_CGGACACAGCTCCTCT	16	skeletal.muscle.fibroblast..fibroblast
10X_P7_14_CGGACACCAGGGTTAG	16	skeletal.muscle.fibroblast..fibroblast
10X_P7_14_CGGACACCATACAGCT	11	capillary.endothelial.cell
10X_P7_14_CGGACACGTTCTGTTT	16	skeletal.muscle.fibroblast..fibroblast
10X_P7_14_CGGACGTCATCGATGT	17	skeletal.muscle.fibroblast..fibroblast.1
10X_P7_14_CGGACGTTCCACGTGG	16	skeletal.muscle.fibroblast..fibroblast
10X_P7_14_CGGACGTTCGTTACGA	2	macrophage
10X_P7_14_CGGACTGCAGTAAGAT	16	skeletal.muscle.fibroblast..fibroblast
10X_P7_14_CGGACTGCAGTTCATG	3	monocyte.derived.dendritic.cell
10X_P7_14_CGGACTGTCACAGGCC	18	myelinating.Schwann.cell
10X_P7_14_CGGAGCTAGGACAGAA	5	skeletal.muscle.satellite.cell
10X_P7_14_CGGAGCTGTTGGTTTG	13	pericyte.cell
10X_P7_14_CGGAGTCGTTTAAGCC	16	skeletal.muscle.fibroblast..fibroblast
10X_P7_14_CGGAGTCTCCAAAGTC	14	tendon.cell
10X_P7_14_CGGAGTCTCGGTGTCG	2	macrophage
10X_P7_14_CGGAGTCTCTTAGCCC	17	skeletal.muscle.fibroblast..fibroblast.1
10X_P7_14_CGGCTAGAGATCACGG	7	B.cell
10X_P7_14_CGGCTAGGTAGCTGCC	2	macrophage
10X_P7_14_CGGCTAGGTCAGCTAT	7	B.cell
10X_P7_14_CGGCTAGGTCTAGTGT	13	pericyte.cell
10X_P7_14_CGGCTAGGTCTTGCGG	13	pericyte.cell
10X_P7_14_CGGCTAGTCCCTAACC	12	blood.vessel.endothelial.cell
10X_P7_14_CGGCTAGTCCCTGACT	11	capillary.endothelial.cell
10X_P7_14_CGGCTAGTCCTATTCA	10	endothelial.cell.of.artery
10X_P7_14_CGGCTAGTCTGCCCTA	6	CD8.positive..alpha.beta.T.cell
10X_P7_14_CGGGTCAAGCAGCGTA	9	vein.endothelial.cell..endothelial.stalk.cell
10X_P7_14_CGGGTCACACCAGTTA	16	skeletal.muscle.fibroblast..fibroblast
10X_P7_14_CGGGTCACAGAGCCAA	17	skeletal.muscle.fibroblast..fibroblast.1
10X_P7_14_CGGGTCAGTGAAAGAG	7	B.cell
10X_P7_14_CGGGTCATCAGTGCAT	17	skeletal.muscle.fibroblast..fibroblast.1
10X_P7_14_CGGTTAAAGATCTGCT	6	CD8.positive..alpha.beta.T.cell
10X_P7_14_CGGTTAAAGCGTCTAT	6	CD8.positive..alpha.beta.T.cell
10X_P7_14_CGGTTAAAGCTAAGAT	16	skeletal.muscle.fibroblast..fibroblast
10X_P7_14_CGGTTAAAGGCATTGG	7	B.cell
10X_P7_14_CGGTTAACATAAAGGT	12	blood.vessel.endothelial.cell
10X_P7_14_CGGTTAATCGGATGGA	17	skeletal.muscle.fibroblast..fibroblast.1
10X_P7_14_CGTAGCGAGACTTTCG	18	myelinating.Schwann.cell
10X_P7_14_CGTAGCGAGCACACAG	15	stromal.cell
10X_P7_14_CGTAGCGAGGAATGGA	14	tendon.cell
10X_P7_14_CGTAGCGCACAGACTT	16	skeletal.muscle.fibroblast..fibroblast
10X_P7_14_CGTAGCGGTTTGGGCC	10	endothelial.cell.of.artery
10X_P7_14_CGTAGCGTCAACGGCC	11	capillary.endothelial.cell
10X_P7_14_CGTAGGCAGCGTTGCC	11	capillary.endothelial.cell
10X_P7_14_CGTAGGCAGGAATCGC	6	CD8.positive..alpha.beta.T.cell
10X_P7_14_CGTAGGCAGGCACATG	2	macrophage
10X_P7_14_CGTAGGCAGGTGCTTT	6	CD8.positive..alpha.beta.T.cell
10X_P7_14_CGTAGGCAGTACGCCC	17	skeletal.muscle.fibroblast..fibroblast.1
10X_P7_14_CGTAGGCAGTCAAGGC	7	B.cell
10X_P7_14_CGTAGGCTCTGGGCCA	2	macrophage
10X_P7_14_CGTCACTTCCGATATG	5	skeletal.muscle.satellite.cell
10X_P7_14_CGTCACTTCCTAGAAC	14	tendon.cell
10X_P7_14_CGTCAGGAGCGAAGGG	11	capillary.endothelial.cell
10X_P7_14_CGTCAGGGTTTGGCGC	7	B.cell
10X_P7_14_CGTCCATAGATATGCA	16	skeletal.muscle.fibroblast..fibroblast
10X_P7_14_CGTCCATCACTTCTGC	9	vein.endothelial.cell..endothelial.stalk.cell
10X_P7_14_CGTCCATGTCATCCCT	17	skeletal.muscle.fibroblast..fibroblast.1
10X_P7_14_CGTCCATTCTTACCTA	16	skeletal.muscle.fibroblast..fibroblast
10X_P7_14_CGTCTACAGCCGTCGT	6	CD8.positive..alpha.beta.T.cell
10X_P7_14_CGTCTACGTGTTAAGA	14	tendon.cell
10X_P7_14_CGTCTACTCGTATCAG	19	smooth.muscle.cell
10X_P7_14_CGTCTACTCGTTTATC	16	skeletal.muscle.fibroblast..fibroblast
10X_P7_14_CGTGAGCAGATAGCAT	10	endothelial.cell.of.artery
10X_P7_14_CGTGAGCTCAACGCTA	7	B.cell
10X_P7_14_CGTGAGCTCTGAAAGA	16	skeletal.muscle.fibroblast..fibroblast
10X_P7_14_CGTGTAAAGTGCTGCC	11	capillary.endothelial.cell
10X_P7_14_CGTGTAAAGTTAGCGG	16	skeletal.muscle.fibroblast..fibroblast
10X_P7_14_CGTGTAACACGACGAA	8	endothelial.cell.of.lymphatic.vessel
10X_P7_14_CGTGTAAGTACCAGTT	6	CD8.positive..alpha.beta.T.cell
10X_P7_14_CGTGTCTAGTGAACAT	13	pericyte.cell
10X_P7_14_CGTTAGACAGAGCCAA	17	skeletal.muscle.fibroblast..fibroblast.1
10X_P7_14_CGTTAGAGTAAACCTC	16	skeletal.muscle.fibroblast..fibroblast
10X_P7_14_CGTTAGAGTAATCGTC	16	skeletal.muscle.fibroblast..fibroblast
10X_P7_14_CGTTAGAGTTCACCTC	11	capillary.endothelial.cell
10X_P7_14_CGTTAGAGTTCATGGT	11	capillary.endothelial.cell
10X_P7_14_CGTTCTGAGCTAGTGG	16	skeletal.muscle.fibroblast..fibroblast
10X_P7_14_CGTTCTGAGCTGATAA	7	B.cell
10X_P7_14_CGTTCTGAGGAGTTGC	16	skeletal.muscle.fibroblast..fibroblast
10X_P7_14_CGTTCTGAGTCGCCGT	11	capillary.endothelial.cell
10X_P7_14_CGTTGGGAGCAAATCA	16	skeletal.muscle.fibroblast..fibroblast
10X_P7_14_CGTTGGGGTGGTGTAG	14	tendon.cell
10X_P7_14_CTAACTTAGAAGGTGA	7	B.cell
10X_P7_14_CTAACTTCACATCTTT	11	capillary.endothelial.cell
10X_P7_14_CTAACTTGTTACGACT	10	endothelial.cell.of.artery
10X_P7_14_CTAACTTGTTTGACTG	7	B.cell
10X_P7_14_CTAACTTTCAGTTGAC	17	skeletal.muscle.fibroblast..fibroblast.1
10X_P7_14_CTAACTTTCCTTTACA	14	tendon.cell
10X_P7_14_CTAAGACAGCCACTAT	11	capillary.endothelial.cell
10X_P7_14_CTAAGACCACTCAGGC	16	skeletal.muscle.fibroblast..fibroblast
10X_P7_14_CTAAGACCATTGGCGC	2	macrophage
10X_P7_14_CTAAGACGTCTCCATC	14	tendon.cell
10X_P7_14_CTAAGACTCAACACAC	11	capillary.endothelial.cell
10X_P7_14_CTAATGGAGCCTCGTG	7	B.cell
10X_P7_14_CTAATGGAGCTGCAAG	2	macrophage
10X_P7_14_CTAATGGAGGCCGAAT	2	macrophage
10X_P7_14_CTAATGGCACGTAAGG	7	B.cell
10X_P7_14_CTACACCAGGAGTCTG	5	skeletal.muscle.satellite.cell
10X_P7_14_CTACACCAGGGTCGAT	7	B.cell
10X_P7_14_CTACACCCATAGGATA	7	B.cell
10X_P7_14_CTACATTAGACAAGCC	16	skeletal.muscle.fibroblast..fibroblast
10X_P7_14_CTACATTGTATGAATG	6	CD8.positive..alpha.beta.T.cell
10X_P7_14_CTACATTGTGACAAAT	7	B.cell
10X_P7_14_CTACATTGTTATGCGT	7	B.cell
10X_P7_14_CTACATTTCCATGAGT	14	tendon.cell
10X_P7_14_CTACATTTCTCTAAGG	10	endothelial.cell.of.artery
10X_P7_14_CTACCCACAAGCGTAG	11	capillary.endothelial.cell
10X_P7_14_CTACCCACACCCAGTG	16	skeletal.muscle.fibroblast..fibroblast
10X_P7_14_CTACCCACACTTGGAT	10	endothelial.cell.of.artery
10X_P7_14_CTACCCACATCAGTCA	11	capillary.endothelial.cell
10X_P7_14_CTACCCAGTATGGTTC	6	CD8.positive..alpha.beta.T.cell
10X_P7_14_CTACCCAGTCGCATAT	12	blood.vessel.endothelial.cell
10X_P7_14_CTACCCATCTTGAGAC	6	CD8.positive..alpha.beta.T.cell
10X_P7_14_CTACGTCAGATGTGGC	14	tendon.cell
10X_P7_14_CTACGTCCACCGAATT	6	CD8.positive..alpha.beta.T.cell
10X_P7_14_CTACGTCGTCTAGAGG	16	skeletal.muscle.fibroblast..fibroblast
10X_P7_14_CTAGAGTAGATGAGAG	9	vein.endothelial.cell..endothelial.stalk.cell
10X_P7_14_CTAGAGTGTCAATACC	17	skeletal.muscle.fibroblast..fibroblast.1
10X_P7_14_CTAGAGTTCAATCTCT	11	capillary.endothelial.cell
10X_P7_14_CTAGCCTAGCGTAGTG	12	blood.vessel.endothelial.cell
10X_P7_14_CTAGCCTGTGTTCTTT	13	pericyte.cell
10X_P7_14_CTAGCCTGTTATGTGC	16	skeletal.muscle.fibroblast..fibroblast
10X_P7_14_CTAGCCTTCAGCACAT	7	B.cell
10X_P7_14_CTAGCCTTCCGTAGGC	6	CD8.positive..alpha.beta.T.cell
10X_P7_14_CTAGCCTTCGCACTCT	13	pericyte.cell
10X_P7_14_CTAGTGACAATCGAAA	13	pericyte.cell
10X_P7_14_CTAGTGAGTAAAGGAG	8	endothelial.cell.of.lymphatic.vessel
10X_P7_14_CTAGTGAGTCCAGTGC	13	pericyte.cell
10X_P7_14_CTAGTGAGTGCAGGTA	17	skeletal.muscle.fibroblast..fibroblast.1
10X_P7_14_CTCACACAGTACGATA	11	capillary.endothelial.cell
10X_P7_14_CTCACACCAAGCGCTC	11	capillary.endothelial.cell
10X_P7_14_CTCACACCACCAGGCT	14	tendon.cell
10X_P7_14_CTCACACCACTCTGTC	6	CD8.positive..alpha.beta.T.cell
10X_P7_14_CTCACACCAGGTCGTC	7	B.cell
10X_P7_14_CTCACACGTAGGCTGA	14	tendon.cell
10X_P7_14_CTCACACGTCCTGCTT	1	striated.muscle.cell
10X_P7_14_CTCACACGTCTCCATC	16	skeletal.muscle.fibroblast..fibroblast
10X_P7_14_CTCACACTCAACACAC	9	vein.endothelial.cell..endothelial.stalk.cell
10X_P7_14_CTCACACTCTATCCCG	5	skeletal.muscle.satellite.cell
10X_P7_14_CTCAGAAAGCCACTAT	14	tendon.cell
10X_P7_14_CTCAGAAAGTAGGCCA	9	vein.endothelial.cell..endothelial.stalk.cell
10X_P7_14_CTCAGAAGTTCCATGA	11	capillary.endothelial.cell
10X_P7_14_CTCAGAATCCCTCTTT	16	skeletal.muscle.fibroblast..fibroblast
10X_P7_14_CTCAGAATCGCGTAGC	1	striated.muscle.cell
10X_P7_14_CTCATTAAGATCGGGT	5	skeletal.muscle.satellite.cell
10X_P7_14_CTCATTAAGCGCTTAT	16	skeletal.muscle.fibroblast..fibroblast
10X_P7_14_CTCATTAAGTCCAGGA	14	tendon.cell
10X_P7_14_CTCATTAAGTTAACGA	11	capillary.endothelial.cell
10X_P7_14_CTCATTAGTTCGCGAC	15	stromal.cell
10X_P7_14_CTCCTAGCACAGACTT	16	skeletal.muscle.fibroblast..fibroblast
10X_P7_14_CTCCTAGCACCACCAG	16	skeletal.muscle.fibroblast..fibroblast
10X_P7_14_CTCCTAGGTCACTGGC	7	B.cell
10X_P7_14_CTCCTAGTCATGTGGT	2	macrophage
10X_P7_14_CTCCTAGTCTTGCAAG	17	skeletal.muscle.fibroblast..fibroblast.1
10X_P7_14_CTCGAAAAGAAGGCCT	7	B.cell
10X_P7_14_CTCGAAAAGTCTTGCA	12	blood.vessel.endothelial.cell
10X_P7_14_CTCGAAACAAGCGAGT	5	skeletal.muscle.satellite.cell
10X_P7_14_CTCGAAAGTATAAACG	16	skeletal.muscle.fibroblast..fibroblast
10X_P7_14_CTCGAAATCCCTAATT	11	capillary.endothelial.cell
10X_P7_14_CTCGAAATCTGTCCGT	11	capillary.endothelial.cell
10X_P7_14_CTCGAGGAGTGACATA	5	skeletal.muscle.satellite.cell
10X_P7_14_CTCGAGGAGTTACCCA	17	skeletal.muscle.fibroblast..fibroblast.1
10X_P7_14_CTCGAGGCAGGGTATG	16	skeletal.muscle.fibroblast..fibroblast
10X_P7_14_CTCGAGGGTACGCACC	16	skeletal.muscle.fibroblast..fibroblast
10X_P7_14_CTCGAGGGTGCTAGCC	6	CD8.positive..alpha.beta.T.cell
10X_P7_14_CTCGAGGTCTCTGCTG	14	tendon.cell
10X_P7_14_CTCGGAGAGTCGTACT	16	skeletal.muscle.fibroblast..fibroblast
10X_P7_14_CTCGGAGAGTTTAGGA	17	skeletal.muscle.fibroblast..fibroblast.1
10X_P7_14_CTCGGAGCATTAGGCT	11	capillary.endothelial.cell
10X_P7_14_CTCGGAGGTACTCAAC	7	B.cell
10X_P7_14_CTCGGAGGTAGCGATG	12	blood.vessel.endothelial.cell
10X_P7_14_CTCGGGAAGAGTACCG	14	tendon.cell
10X_P7_14_CTCGGGAAGTATTGGA	5	skeletal.muscle.satellite.cell
10X_P7_14_CTCGGGACAACGATCT	7	B.cell
10X_P7_14_CTCGTACGTCAGAAGC	7	B.cell
10X_P7_14_CTCGTACGTTAGAACA	16	skeletal.muscle.fibroblast..fibroblast
10X_P7_14_CTCGTCATCGGAAACG	10	endothelial.cell.of.artery
10X_P7_14_CTCGTCATCGTTGACA	2	macrophage
10X_P7_14_CTCTAATAGCAGATCG	11	capillary.endothelial.cell
10X_P7_14_CTCTAATAGGCAAAGA	16	skeletal.muscle.fibroblast..fibroblast
10X_P7_14_CTCTAATAGTTAAGTG	14	tendon.cell
10X_P7_14_CTCTAATCATCCGTGG	7	B.cell
10X_P7_14_CTCTAATCATGTCTCC	16	skeletal.muscle.fibroblast..fibroblast
10X_P7_14_CTCTAATTCTCAAACG	17	skeletal.muscle.fibroblast..fibroblast.1
10X_P7_14_CTCTACGAGGCTCATT	17	skeletal.muscle.fibroblast..fibroblast.1
10X_P7_14_CTCTACGAGTCTCCTC	16	skeletal.muscle.fibroblast..fibroblast
10X_P7_14_CTCTACGTCGAATGGG	17	skeletal.muscle.fibroblast..fibroblast.1
10X_P7_14_CTCTGGTAGTTCGCAT	6	CD8.positive..alpha.beta.T.cell
10X_P7_14_CTCTGGTCACATCCAA	12	blood.vessel.endothelial.cell
10X_P7_14_CTCTGGTCATGCCCGA	17	skeletal.muscle.fibroblast..fibroblast.1
10X_P7_14_CTCTGGTTCGGCCGAT	17	skeletal.muscle.fibroblast..fibroblast.1
10X_P7_14_CTGAAACCACTGAAGG	10	endothelial.cell.of.artery
10X_P7_14_CTGAAACCAGGGTTAG	16	skeletal.muscle.fibroblast..fibroblast
10X_P7_14_CTGAAACGTCATCCCT	17	skeletal.muscle.fibroblast..fibroblast.1
10X_P7_14_CTGAAACGTCGCGTGT	14	tendon.cell
10X_P7_14_CTGAAACTCCGAAGAG	14	tendon.cell
10X_P7_14_CTGAAGTAGTAGCCGA	14	tendon.cell
10X_P7_14_CTGAAGTAGTCGTTTG	6	CD8.positive..alpha.beta.T.cell
10X_P7_14_CTGAAGTGTCTAGCCG	2	macrophage
10X_P7_14_CTGAAGTTCAAGCCTA	13	pericyte.cell
10X_P7_14_CTGAAGTTCCATTCTA	11	capillary.endothelial.cell
10X_P7_14_CTGAAGTTCCTAGTGA	5	skeletal.muscle.satellite.cell
10X_P7_14_CTGATAGCAGAAGCAC	7	B.cell
10X_P7_14_CTGATAGGTGTGTGCC	16	skeletal.muscle.fibroblast..fibroblast
10X_P7_14_CTGATAGTCGACCAGC	3	monocyte.derived.dendritic.cell
10X_P7_14_CTGATAGTCGGTGTTA	6	CD8.positive..alpha.beta.T.cell
10X_P7_14_CTGATAGTCTAACTGG	6	CD8.positive..alpha.beta.T.cell
10X_P7_14_CTGATCCCAATGTTGC	14	tendon.cell
10X_P7_14_CTGATCCGTTACGACT	14	tendon.cell
10X_P7_14_CTGATCCGTTCGAATC	6	CD8.positive..alpha.beta.T.cell
10X_P7_14_CTGATCCTCAGCATGT	7	B.cell
10X_P7_14_CTGATCCTCCGCAAGC	7	B.cell
10X_P7_14_CTGATCCTCCTTGCCA	14	tendon.cell
10X_P7_14_CTGATCCTCTGAGGGA	12	blood.vessel.endothelial.cell
10X_P7_14_CTGCCTAGTAATTGGA	12	blood.vessel.endothelial.cell
10X_P7_14_CTGCCTAGTCGTTGTA	12	blood.vessel.endothelial.cell
10X_P7_14_CTGCCTAGTTCCGTCT	11	capillary.endothelial.cell
10X_P7_14_CTGCCTAGTTTGCATG	17	skeletal.muscle.fibroblast..fibroblast.1
10X_P7_14_CTGCCTATCCTTTCGG	5	skeletal.muscle.satellite.cell
10X_P7_14_CTGCGGACAGCTGTTA	3	monocyte.derived.dendritic.cell
10X_P7_14_CTGCGGAGTATAGTAG	16	skeletal.muscle.fibroblast..fibroblast
10X_P7_14_CTGCGGAGTTTAAGCC	17	skeletal.muscle.fibroblast..fibroblast.1
10X_P7_14_CTGCGGATCAACGCTA	5	skeletal.muscle.satellite.cell
10X_P7_14_CTGCTGTAGCCCAATT	14	tendon.cell
10X_P7_14_CTGCTGTCATGACATC	17	skeletal.muscle.fibroblast..fibroblast.1
10X_P7_14_CTGCTGTGTACATCCA	16	skeletal.muscle.fibroblast..fibroblast
10X_P7_14_CTGCTGTGTATTAGCC	5	skeletal.muscle.satellite.cell
10X_P7_14_CTGCTGTGTCAACATC	2	macrophage
10X_P7_14_CTGGTCTAGTACATGA	16	skeletal.muscle.fibroblast..fibroblast
10X_P7_14_CTGGTCTAGTCGCCGT	14	tendon.cell
10X_P7_14_CTGGTCTCACGGTTTA	11	capillary.endothelial.cell
10X_P7_14_CTGGTCTCATTGGTAC	16	skeletal.muscle.fibroblast..fibroblast
10X_P7_14_CTGTGCTAGCTAAACA	3	monocyte.derived.dendritic.cell
10X_P7_14_CTGTGCTCAACTTGAC	7	B.cell
10X_P7_14_CTGTGCTCACTAGTAC	5	skeletal.muscle.satellite.cell
10X_P7_14_CTGTGCTGTAGAGGAA	11	capillary.endothelial.cell
10X_P7_14_CTGTGCTTCATGCTCC	7	B.cell
10X_P7_14_CTGTGCTTCCAGAAGG	3	monocyte.derived.dendritic.cell
10X_P7_14_CTGTGCTTCTGCTGTC	16	skeletal.muscle.fibroblast..fibroblast
10X_P7_14_CTGTTTAAGGTGGGTT	17	skeletal.muscle.fibroblast..fibroblast.1
10X_P7_14_CTGTTTAAGTTACCCA	16	skeletal.muscle.fibroblast..fibroblast
10X_P7_14_CTTAACTAGCACAGGT	8	endothelial.cell.of.lymphatic.vessel
10X_P7_14_CTTAACTAGCTCCTCT	6	CD8.positive..alpha.beta.T.cell
10X_P7_14_CTTAACTTCACGACTA	12	blood.vessel.endothelial.cell
10X_P7_14_CTTAACTTCCACGTGG	5	skeletal.muscle.satellite.cell
10X_P7_14_CTTAACTTCCAGATCA	7	B.cell
10X_P7_14_CTTACCGCAAGTACCT	14	tendon.cell
10X_P7_14_CTTACCGCACGGCCAT	2	macrophage
10X_P7_14_CTTACCGCACTTACGA	14	tendon.cell
10X_P7_14_CTTACCGTCTCGCATC	6	CD8.positive..alpha.beta.T.cell
10X_P7_14_CTTACCGTCTTACCTA	5	skeletal.muscle.satellite.cell
10X_P7_14_CTTAGGAGTCATATGC	13	pericyte.cell
10X_P7_14_CTTAGGAGTGGGTCAA	11	capillary.endothelial.cell
10X_P7_14_CTTCTCTAGAAGGCCT	2	macrophage
10X_P7_14_CTTCTCTAGATGAGAG	17	skeletal.muscle.fibroblast..fibroblast.1
10X_P7_14_CTTCTCTAGGTGCTAG	6	CD8.positive..alpha.beta.T.cell
10X_P7_14_CTTCTCTCAGGGATTG	11	capillary.endothelial.cell
10X_P7_14_CTTCTCTGTGCCTTGG	2	macrophage
10X_P7_14_CTTCTCTGTTCACCTC	7	B.cell
10X_P7_14_CTTCTCTTCTTTACGT	12	blood.vessel.endothelial.cell
10X_P7_14_CTTGGCTAGAGATGAG	9	vein.endothelial.cell..endothelial.stalk.cell
10X_P7_14_CTTGGCTAGCAGCGTA	11	capillary.endothelial.cell
10X_P7_14_CTTGGCTCAGTGACAG	7	B.cell
10X_P7_14_CTTGGCTGTCCGTCAG	14	tendon.cell
10X_P7_14_CTTGGCTGTTTCGCTC	14	tendon.cell
10X_P7_14_CTTGGCTTCAAGGTAA	2	macrophage
10X_P7_14_CTTTGCGAGCGCTTAT	16	skeletal.muscle.fibroblast..fibroblast
10X_P7_14_CTTTGCGCAACACCTA	7	B.cell
10X_P7_14_CTTTGCGGTACTCAAC	5	skeletal.muscle.satellite.cell
10X_P7_14_CTTTGCGGTGGTCTCG	5	skeletal.muscle.satellite.cell
10X_P7_14_GAAACTCGTCGAGTTT	9	vein.endothelial.cell..endothelial.stalk.cell
10X_P7_14_GAAACTCTCTCGAGTA	5	skeletal.muscle.satellite.cell
10X_P7_14_GAAATGAAGTTAGGTA	6	CD8.positive..alpha.beta.T.cell
10X_P7_14_GAAATGACAATAAGCA	11	capillary.endothelial.cell
10X_P7_14_GAACATCAGACCTAGG	2	macrophage
10X_P7_14_GAACATCCAGGCTGAA	13	pericyte.cell
10X_P7_14_GAACATCGTCACACGC	11	capillary.endothelial.cell
10X_P7_14_GAACATCGTCTGGTCG	3	monocyte.derived.dendritic.cell
10X_P7_14_GAACATCGTTGATTCG	7	B.cell
10X_P7_14_GAACCTAAGTATCGAA	5	skeletal.muscle.satellite.cell
10X_P7_14_GAACCTACAATCAGAA	10	endothelial.cell.of.artery
10X_P7_14_GAACCTAGTAAAGTCA	16	skeletal.muscle.fibroblast..fibroblast
10X_P7_14_GAACCTAGTTTCGCTC	7	B.cell
10X_P7_14_GAACGGAAGGTGGGTT	14	tendon.cell
10X_P7_14_GAAGCAGGTAGGCTGA	12	blood.vessel.endothelial.cell
10X_P7_14_GAAGCAGGTGACTCAT	7	B.cell
10X_P7_14_GAATAAGCAATAACGA	5	skeletal.muscle.satellite.cell
10X_P7_14_GAATAAGGTGGTTTCA	9	vein.endothelial.cell..endothelial.stalk.cell
10X_P7_14_GAATGAACAGCTCGCA	7	B.cell
10X_P7_14_GAATGAACAGGAACGT	12	blood.vessel.endothelial.cell
10X_P7_14_GAATGAAGTAGGCTGA	16	skeletal.muscle.fibroblast..fibroblast
10X_P7_14_GAATGAAGTCAGTGGA	3	monocyte.derived.dendritic.cell
10X_P7_14_GAATGAAGTTAAGGGC	7	B.cell
10X_P7_14_GAATGAATCAGCTGGC	16	skeletal.muscle.fibroblast..fibroblast
10X_P7_14_GAATGAATCGGCCGAT	5	skeletal.muscle.satellite.cell
10X_P7_14_GACACGCAGCGCCTTG	5	skeletal.muscle.satellite.cell
10X_P7_14_GACACGCAGCTCCTCT	9	vein.endothelial.cell..endothelial.stalk.cell
10X_P7_14_GACACGCAGGTAGCTG	11	capillary.endothelial.cell
10X_P7_14_GACACGCCATATACCG	16	skeletal.muscle.fibroblast..fibroblast
10X_P7_14_GACACGCGTCAGTGGA	17	skeletal.muscle.fibroblast..fibroblast.1
10X_P7_14_GACACGCGTTGCGCAC	6	CD8.positive..alpha.beta.T.cell
10X_P7_14_GACACGCTCAACGGCC	2	macrophage
10X_P7_14_GACACGCTCATGCATG	12	blood.vessel.endothelial.cell
10X_P7_14_GACACGCTCGTTGCCT	6	CD8.positive..alpha.beta.T.cell
10X_P7_14_GACACGCTCTGCAGTA	11	capillary.endothelial.cell
10X_P7_14_GACAGAGCAAAGTCAA	2	macrophage
10X_P7_14_GACAGAGCACGGTGTC	11	capillary.endothelial.cell
10X_P7_14_GACAGAGGTGTCGCTG	10	endothelial.cell.of.artery
10X_P7_14_GACCAATAGAAGGCCT	16	skeletal.muscle.fibroblast..fibroblast
10X_P7_14_GACCAATCACTGTGTA	16	skeletal.muscle.fibroblast..fibroblast
10X_P7_14_GACCAATGTCTCTCGT	7	B.cell
10X_P7_14_GACCAATGTGCGGTAA	7	B.cell
10X_P7_14_GACCAATTCAAAGTAG	12	blood.vessel.endothelial.cell
10X_P7_14_GACCTGGCAATACGCT	16	skeletal.muscle.fibroblast..fibroblast
10X_P7_14_GACCTGGGTAATCACC	5	skeletal.muscle.satellite.cell
10X_P7_14_GACCTGGGTGATGATA	5	skeletal.muscle.satellite.cell
10X_P7_14_GACCTGGTCCCTCAGT	16	skeletal.muscle.fibroblast..fibroblast
10X_P7_14_GACGCGTAGCTAAACA	7	B.cell
10X_P7_14_GACGCGTGTGGCGAAT	11	capillary.endothelial.cell
10X_P7_14_GACGCGTTCCGAACGC	3	monocyte.derived.dendritic.cell
10X_P7_14_GACGCGTTCGTCCAGG	8	endothelial.cell.of.lymphatic.vessel
10X_P7_14_GACGGCTTCAACACTG	16	skeletal.muscle.fibroblast..fibroblast
10X_P7_14_GACGGCTTCCAGATCA	14	tendon.cell
10X_P7_14_GACGGCTTCGAATGGG	16	skeletal.muscle.fibroblast..fibroblast
10X_P7_14_GACGGCTTCTAGCACA	10	endothelial.cell.of.artery
10X_P7_14_GACGGCTTCTCTGTCG	12	blood.vessel.endothelial.cell
10X_P7_14_GACGTGCAGAAGGGTA	11	capillary.endothelial.cell
10X_P7_14_GACGTGCCAAGAGGCT	10	endothelial.cell.of.artery
10X_P7_14_GACGTGCCAGGGTACA	6	CD8.positive..alpha.beta.T.cell
10X_P7_14_GACGTGCGTGCGATAG	16	skeletal.muscle.fibroblast..fibroblast
10X_P7_14_GACGTGCTCAAGCCTA	8	endothelial.cell.of.lymphatic.vessel
10X_P7_14_GACGTGCTCCGCAGTG	16	skeletal.muscle.fibroblast..fibroblast
10X_P7_14_GACGTTAAGCTAACAA	7	B.cell
10X_P7_14_GACGTTAGTCCTAGCG	17	skeletal.muscle.fibroblast..fibroblast.1
10X_P7_14_GACGTTAGTCCTCTTG	13	pericyte.cell
10X_P7_14_GACGTTATCGGCCGAT	16	skeletal.muscle.fibroblast..fibroblast
10X_P7_14_GACTAACAGTCCAGGA	13	pericyte.cell
10X_P7_14_GACTAACGTCCGAGTC	4	T.helper.17.cell
10X_P7_14_GACTAACGTCTGGAGA	11	capillary.endothelial.cell
10X_P7_14_GACTAACGTGGCAAAC	12	blood.vessel.endothelial.cell
10X_P7_14_GACTAACTCGCTTGTC	11	capillary.endothelial.cell
10X_P7_14_GACTACAAGCTGAAAT	16	skeletal.muscle.fibroblast..fibroblast
10X_P7_14_GACTACACAAGCGAGT	11	capillary.endothelial.cell
10X_P7_14_GACTACACACATCCAA	12	blood.vessel.endothelial.cell
10X_P7_14_GACTACACATACTACG	14	tendon.cell
10X_P7_14_GACTACAGTACCCAAT	16	skeletal.muscle.fibroblast..fibroblast
10X_P7_14_GACTGCGAGAAACCGC	16	skeletal.muscle.fibroblast..fibroblast
10X_P7_14_GACTGCGAGCATCATC	10	endothelial.cell.of.artery
10X_P7_14_GACTGCGAGCTGATAA	16	skeletal.muscle.fibroblast..fibroblast
10X_P7_14_GACTGCGCACAACGCC	13	pericyte.cell
10X_P7_14_GACTGCGCACCGTTGG	7	B.cell
10X_P7_14_GACTGCGCAGCCAGAA	14	tendon.cell
10X_P7_14_GACTGCGCATGCTAGT	7	B.cell
10X_P7_14_GACTGCGGTGTTAAGA	11	capillary.endothelial.cell
10X_P7_14_GACTGCGTCCCTCTTT	12	blood.vessel.endothelial.cell
10X_P7_14_GACTGCGTCTCTGCTG	14	tendon.cell
10X_P7_14_GAGCAGACAGCTGCTG	6	CD8.positive..alpha.beta.T.cell
10X_P7_14_GAGCAGAGTACAGCAG	11	capillary.endothelial.cell
10X_P7_14_GAGGTGAAGTTACCCA	17	skeletal.muscle.fibroblast..fibroblast.1
10X_P7_14_GAGGTGAGTGAAGGCT	9	vein.endothelial.cell..endothelial.stalk.cell
10X_P7_14_GAGGTGATCTAACTCT	7	B.cell
10X_P7_14_GAGGTGATCTAACTGG	17	skeletal.muscle.fibroblast..fibroblast.1
10X_P7_14_GAGTCCGAGGGTATCG	17	skeletal.muscle.fibroblast..fibroblast.1
10X_P7_14_GAGTCCGAGTGAAGTT	17	skeletal.muscle.fibroblast..fibroblast.1
10X_P7_14_GAGTCCGCAATGTAAG	16	skeletal.muscle.fibroblast..fibroblast
10X_P7_14_GAGTCCGGTCCGAACC	7	B.cell
10X_P7_14_GAGTCCGGTCGCTTTC	5	skeletal.muscle.satellite.cell
10X_P7_14_GAGTCCGGTGTCTGAT	7	B.cell
10X_P7_14_GAGTCCGTCTTTACGT	7	B.cell
10X_P7_14_GATCAGTAGGTGCTTT	7	B.cell
10X_P7_14_GATCAGTAGGTGTTAA	11	capillary.endothelial.cell
10X_P7_14_GATCAGTAGTCGTTTG	2	macrophage
10X_P7_14_GATCAGTGTTCGCGAC	16	skeletal.muscle.fibroblast..fibroblast
10X_P7_14_GATCGATTCAAGGCTT	5	skeletal.muscle.satellite.cell
10X_P7_14_GATCGCGAGCAAATCA	6	CD8.positive..alpha.beta.T.cell
10X_P7_14_GATCGCGGTAGAGTGC	6	CD8.positive..alpha.beta.T.cell
10X_P7_14_GATCGCGTCAGAGGTG	5	skeletal.muscle.satellite.cell
10X_P7_14_GATCGCGTCTTAGCCC	14	tendon.cell
10X_P7_14_GATCGTAAGGGCATGT	2	macrophage
10X_P7_14_GATCGTACAATGCCAT	7	B.cell
10X_P7_14_GATCGTACACTGCCAG	17	skeletal.muscle.fibroblast..fibroblast.1
10X_P7_14_GATCGTACATTAGGCT	5	skeletal.muscle.satellite.cell
10X_P7_14_GATCGTAGTTGACGTT	7	B.cell
10X_P7_14_GATCGTATCCAGAAGG	4	T.helper.17.cell
10X_P7_14_GATCTAGCAATCACAC	16	skeletal.muscle.fibroblast..fibroblast
10X_P7_14_GATCTAGCAGCCAGAA	5	skeletal.muscle.satellite.cell
10X_P7_14_GATCTAGGTAAGGGCT	16	skeletal.muscle.fibroblast..fibroblast
10X_P7_14_GATCTAGGTCATGCCG	11	capillary.endothelial.cell
10X_P7_14_GATGAAAAGAGTTGGC	11	capillary.endothelial.cell
10X_P7_14_GATGAAACAGCTCGAC	11	capillary.endothelial.cell
10X_P7_14_GATGAAAGTGAGGGAG	5	skeletal.muscle.satellite.cell
10X_P7_14_GATGAAATCAAACAAG	16	skeletal.muscle.fibroblast..fibroblast
10X_P7_14_GATGAAATCACAGGCC	16	skeletal.muscle.fibroblast..fibroblast
10X_P7_14_GATGAAATCGTTACAG	10	endothelial.cell.of.artery
10X_P7_14_GATGAGGAGTTCGCGC	14	tendon.cell
10X_P7_14_GATGAGGCACGAAAGC	17	skeletal.muscle.fibroblast..fibroblast.1
10X_P7_14_GATGAGGCACGGACAA	12	blood.vessel.endothelial.cell
10X_P7_14_GATGAGGTCAAAGTAG	6	CD8.positive..alpha.beta.T.cell
10X_P7_14_GATGCTAAGAGCTTCT	16	skeletal.muscle.fibroblast..fibroblast
10X_P7_14_GATGCTAAGGCGTACA	5	skeletal.muscle.satellite.cell
10X_P7_14_GATGCTACACTAGTAC	6	CD8.positive..alpha.beta.T.cell
10X_P7_14_GATGCTACATATGCTG	1	striated.muscle.cell
10X_P7_14_GATGCTAGTGTGAAAT	6	CD8.positive..alpha.beta.T.cell
10X_P7_14_GATGCTATCAGTACGT	16	skeletal.muscle.fibroblast..fibroblast
10X_P7_14_GATGCTATCCTCATTA	7	B.cell
10X_P7_14_GATGCTATCGAGGTAG	10	endothelial.cell.of.artery
10X_P7_14_GATGCTATCGTAGGTT	16	skeletal.muscle.fibroblast..fibroblast
10X_P7_14_GCAAACTAGCTGAAAT	5	skeletal.muscle.satellite.cell
10X_P7_14_GCAAACTAGTGACATA	16	skeletal.muscle.fibroblast..fibroblast
10X_P7_14_GCAAACTCATGAGCGA	11	capillary.endothelial.cell
10X_P7_14_GCAAACTGTAAGTGGC	11	capillary.endothelial.cell
10X_P7_14_GCAAACTGTCATTAGC	9	vein.endothelial.cell..endothelial.stalk.cell
10X_P7_14_GCAAACTTCAACGCTA	14	tendon.cell
10X_P7_14_GCAAACTTCGGTTAAC	11	capillary.endothelial.cell
10X_P7_14_GCAATCAAGCCACGTC	11	capillary.endothelial.cell
10X_P7_14_GCAATCACAAACTGCT	11	capillary.endothelial.cell
10X_P7_14_GCAATCACAAGGCTCC	17	skeletal.muscle.fibroblast..fibroblast.1
10X_P7_14_GCAATCACAATCCGAT	7	B.cell
10X_P7_14_GCAATCAGTCACCTAA	6	CD8.positive..alpha.beta.T.cell
10X_P7_14_GCAATCAGTGACGCCT	9	vein.endothelial.cell..endothelial.stalk.cell
10X_P7_14_GCACATAAGCTAACTC	11	capillary.endothelial.cell
10X_P7_14_GCACATACACAAGACG	10	endothelial.cell.of.artery
10X_P7_14_GCACATAGTACCATCA	7	B.cell
10X_P7_14_GCACATAGTCTGGTCG	7	B.cell
10X_P7_14_GCACATAGTGCAACGA	11	capillary.endothelial.cell
10X_P7_14_GCACATATCAGTCAGT	3	monocyte.derived.dendritic.cell
10X_P7_14_GCACATATCCGTAGGC	16	skeletal.muscle.fibroblast..fibroblast
10X_P7_14_GCACTCTAGTGTTAGA	7	B.cell
10X_P7_14_GCACTCTTCAACACAC	14	tendon.cell
10X_P7_14_GCAGCCAAGAGTCTGG	16	skeletal.muscle.fibroblast..fibroblast
10X_P7_14_GCAGCCACAGCTCGAC	16	skeletal.muscle.fibroblast..fibroblast
10X_P7_14_GCAGCCAGTCAAAGCG	12	blood.vessel.endothelial.cell
10X_P7_14_GCAGCCATCTACGAGT	12	blood.vessel.endothelial.cell
10X_P7_14_GCAGTTAGTTATTCTC	17	skeletal.muscle.fibroblast..fibroblast.1
10X_P7_14_GCAGTTATCCTAAGTG	5	skeletal.muscle.satellite.cell
10X_P7_14_GCAGTTATCGCGTAGC	11	capillary.endothelial.cell
10X_P7_14_GCAGTTATCTGGCGTG	8	endothelial.cell.of.lymphatic.vessel
10X_P7_14_GCATACAAGACTGTAA	18	myelinating.Schwann.cell
10X_P7_14_GCATACAAGTTGAGAT	6	CD8.positive..alpha.beta.T.cell
10X_P7_14_GCATACACAATCACAC	6	CD8.positive..alpha.beta.T.cell
10X_P7_14_GCATACAGTCATGCCG	16	skeletal.muscle.fibroblast..fibroblast
10X_P7_14_GCATACAGTTACGGAG	14	tendon.cell
10X_P7_14_GCATACATCACTTCAT	7	B.cell
10X_P7_14_GCATACATCCGTTGTC	7	B.cell
10X_P7_14_GCATGATAGTACGACG	5	skeletal.muscle.satellite.cell
10X_P7_14_GCATGATTCCCTTGTG	7	B.cell
10X_P7_14_GCATGATTCGAATGCT	14	tendon.cell
10X_P7_14_GCATGCGCAACACCCG	11	capillary.endothelial.cell
10X_P7_14_GCATGCGCAATGGATA	16	skeletal.muscle.fibroblast..fibroblast
10X_P7_14_GCATGCGGTATATGGA	2	macrophage
10X_P7_14_GCATGTACAGACAAGC	7	B.cell
10X_P7_14_GCATGTAGTAAATGAC	13	pericyte.cell
10X_P7_14_GCATGTATCTGGTGTA	11	capillary.endothelial.cell
10X_P7_14_GCCAAATGTGATAAAC	16	skeletal.muscle.fibroblast..fibroblast
10X_P7_14_GCCAAATTCAGCTGGC	13	pericyte.cell
10X_P7_14_GCCAAATTCGCGTTTC	14	tendon.cell
10X_P7_14_GCCAAATTCTCTGTCG	15	stromal.cell
10X_P7_14_GCCTCTAAGGCACATG	11	capillary.endothelial.cell
10X_P7_14_GCCTCTAGTACCGTTA	14	tendon.cell
10X_P7_14_GCCTCTATCATATCGG	6	CD8.positive..alpha.beta.T.cell
10X_P7_14_GCCTCTATCTAACTGG	16	skeletal.muscle.fibroblast..fibroblast
10X_P7_14_GCCTCTATCTCGATGA	17	skeletal.muscle.fibroblast..fibroblast.1
10X_P7_14_GCGACCAGTGATGTGG	14	tendon.cell
10X_P7_14_GCGACCAGTGTATGGG	16	skeletal.muscle.fibroblast..fibroblast
10X_P7_14_GCGAGAAAGCACGCCT	16	skeletal.muscle.fibroblast..fibroblast
10X_P7_14_GCGAGAAGTATATGAG	6	CD8.positive..alpha.beta.T.cell
10X_P7_14_GCGAGAATCTTGCATT	7	B.cell
10X_P7_14_GCGCAACCAAAGCAAT	13	pericyte.cell
10X_P7_14_GCGCAACCAATGACCT	11	capillary.endothelial.cell
10X_P7_14_GCGCAACCACCAACCG	16	skeletal.muscle.fibroblast..fibroblast
10X_P7_14_GCGCAACCATCATCCC	6	CD8.positive..alpha.beta.T.cell
10X_P7_14_GCGCAACGTCCAGTGC	14	tendon.cell
10X_P7_14_GCGCAACTCAATACCG	7	B.cell
10X_P7_14_GCGCAACTCTATCGCC	7	B.cell
10X_P7_14_GCGCAGTAGATACACA	19	smooth.muscle.cell
10X_P7_14_GCGCAGTCAAAGAATC	13	pericyte.cell
10X_P7_14_GCGCAGTCAGTCGTGC	12	blood.vessel.endothelial.cell
10X_P7_14_GCGCAGTGTGGTTTCA	3	monocyte.derived.dendritic.cell
10X_P7_14_GCGCAGTTCCGCTGTT	11	capillary.endothelial.cell
10X_P7_14_GCGCCAAAGCACCGCT	6	CD8.positive..alpha.beta.T.cell
10X_P7_14_GCGCCAAAGTAGATGT	16	skeletal.muscle.fibroblast..fibroblast
10X_P7_14_GCGCCAAAGTGTGAAT	7	B.cell
10X_P7_14_GCGCCAACAATGAATG	11	capillary.endothelial.cell
10X_P7_14_GCGCGATAGTGGCACA	14	tendon.cell
10X_P7_14_GCGCGATCAAATCCGT	11	capillary.endothelial.cell
10X_P7_14_GCGCGATCATTCCTGC	7	B.cell
10X_P7_14_GCGCGATCATTGAGCT	14	tendon.cell
10X_P7_14_GCGGGTTAGCCATCGC	7	B.cell
10X_P7_14_GCGGGTTCAGGATTGG	11	capillary.endothelial.cell
10X_P7_14_GCGGGTTTCACCAGGC	6	CD8.positive..alpha.beta.T.cell
10X_P7_14_GCGGGTTTCCGATATG	13	pericyte.cell
10X_P7_14_GCTCCTACACATTTCT	16	skeletal.muscle.fibroblast..fibroblast
10X_P7_14_GCTCCTACACGAAAGC	7	B.cell
10X_P7_14_GCTCCTATCATCACCC	16	skeletal.muscle.fibroblast..fibroblast
10X_P7_14_GCTCCTATCCCTTGTG	11	capillary.endothelial.cell
10X_P7_14_GCTCTGTAGGATGGTC	7	B.cell
10X_P7_14_GCTCTGTAGGGCATGT	7	B.cell
10X_P7_14_GCTCTGTAGTTGTAGA	16	skeletal.muscle.fibroblast..fibroblast
10X_P7_14_GCTCTGTCACCGCTAG	7	B.cell
10X_P7_14_GCTCTGTGTTCAACCA	6	CD8.positive..alpha.beta.T.cell
10X_P7_14_GCTCTGTTCGTACCGG	16	skeletal.muscle.fibroblast..fibroblast
10X_P7_14_GCTCTGTTCTGTACGA	7	B.cell
10X_P7_14_GCTGCAGAGAATGTGT	18	myelinating.Schwann.cell
10X_P7_14_GCTGCAGGTCTCTTTA	16	skeletal.muscle.fibroblast..fibroblast
10X_P7_14_GCTGCAGGTTTAGCTG	6	CD8.positive..alpha.beta.T.cell
10X_P7_14_GCTGCAGTCCGAATGT	3	monocyte.derived.dendritic.cell
10X_P7_14_GCTGCGACAAAGTGCG	6	CD8.positive..alpha.beta.T.cell
10X_P7_14_GCTGCGACAATGGAAT	14	tendon.cell
10X_P7_14_GCTGCGACATACGCTA	14	tendon.cell
10X_P7_14_GCTGCGACATCGATGT	8	endothelial.cell.of.lymphatic.vessel
10X_P7_14_GCTGCGAGTTCAGACT	5	skeletal.muscle.satellite.cell
10X_P7_14_GCTGCGATCAGCGACC	14	tendon.cell
10X_P7_14_GCTGCGATCCCTAATT	11	capillary.endothelial.cell
10X_P7_14_GCTGCGATCGGCTACG	3	monocyte.derived.dendritic.cell
10X_P7_14_GCTGCTTAGACGCTTT	16	skeletal.muscle.fibroblast..fibroblast
10X_P7_14_GCTGCTTGTCGCTTCT	14	tendon.cell
10X_P7_14_GCTGCTTTCATTCACT	5	skeletal.muscle.satellite.cell
10X_P7_14_GCTGCTTTCCAGAGGA	9	vein.endothelial.cell..endothelial.stalk.cell
10X_P7_14_GCTGGGTAGCACCGCT	5	skeletal.muscle.satellite.cell
10X_P7_14_GCTGGGTCAAGTCTAC	16	skeletal.muscle.fibroblast..fibroblast
10X_P7_14_GCTGGGTTCACTTACT	5	skeletal.muscle.satellite.cell
10X_P7_14_GCTGGGTTCCAAAGTC	10	endothelial.cell.of.artery
10X_P7_14_GCTTCCAAGCAGCGTA	11	capillary.endothelial.cell
10X_P7_14_GCTTCCAAGTACGTTC	5	skeletal.muscle.satellite.cell
10X_P7_14_GCTTCCAGTCTTGTCC	5	skeletal.muscle.satellite.cell
10X_P7_14_GCTTCCAGTGTTCGAT	11	capillary.endothelial.cell
10X_P7_14_GCTTCCAGTTCCTCCA	16	skeletal.muscle.fibroblast..fibroblast
10X_P7_14_GCTTGAAGTTCCTCCA	10	endothelial.cell.of.artery
10X_P7_14_GGAAAGCAGAGTGAGA	14	tendon.cell
10X_P7_14_GGAAAGCCAGCCAATT	16	skeletal.muscle.fibroblast..fibroblast
10X_P7_14_GGAAAGCTCCCTCTTT	12	blood.vessel.endothelial.cell
10X_P7_14_GGAAAGCTCGCATGGC	6	CD8.positive..alpha.beta.T.cell
10X_P7_14_GGAACTTCAGAGTGTG	17	skeletal.muscle.fibroblast..fibroblast.1
10X_P7_14_GGAACTTGTACACCGC	5	skeletal.muscle.satellite.cell
10X_P7_14_GGAACTTTCAGGCCCA	6	CD8.positive..alpha.beta.T.cell
10X_P7_14_GGAATAAAGCGCCTCA	13	pericyte.cell
10X_P7_14_GGAATAAGTACCAGTT	7	B.cell
10X_P7_14_GGAATAAGTGCACTTA	17	skeletal.muscle.fibroblast..fibroblast.1
10X_P7_14_GGAATAATCTCCTATA	10	endothelial.cell.of.artery
10X_P7_14_GGACAAGAGGATCGCA	11	capillary.endothelial.cell
10X_P7_14_GGACAAGGTTGCGCAC	16	skeletal.muscle.fibroblast..fibroblast
10X_P7_14_GGACAAGTCGCCATAA	13	pericyte.cell
10X_P7_14_GGACAGAAGTGTTTGC	12	blood.vessel.endothelial.cell
10X_P7_14_GGACAGACACGACGAA	6	CD8.positive..alpha.beta.T.cell
10X_P7_14_GGACAGAGTTAAGATG	14	tendon.cell
10X_P7_14_GGACATTAGACATAAC	11	capillary.endothelial.cell
10X_P7_14_GGACATTCACTAGTAC	17	skeletal.muscle.fibroblast..fibroblast.1
10X_P7_14_GGACATTGTGAAATCA	10	endothelial.cell.of.artery
10X_P7_14_GGACATTGTGGCTCCA	11	capillary.endothelial.cell
10X_P7_14_GGACATTGTTCGTCTC	16	skeletal.muscle.fibroblast..fibroblast
10X_P7_14_GGACATTTCGCGTTTC	6	CD8.positive..alpha.beta.T.cell
10X_P7_14_GGAGCAACAATGACCT	6	CD8.positive..alpha.beta.T.cell
10X_P7_14_GGAGCAACAGTTTACG	7	B.cell
10X_P7_14_GGAGCAACATTGGGCC	14	tendon.cell
10X_P7_14_GGAGCAATCGACGGAA	16	skeletal.muscle.fibroblast..fibroblast
10X_P7_14_GGATGTTAGGAGTTGC	6	CD8.positive..alpha.beta.T.cell
10X_P7_14_GGATGTTAGGTAGCTG	7	B.cell
10X_P7_14_GGATGTTTCAATCACG	5	skeletal.muscle.satellite.cell
10X_P7_14_GGATGTTTCGTGGGAA	16	skeletal.muscle.fibroblast..fibroblast
10X_P7_14_GGATTACAGTTACGGG	5	skeletal.muscle.satellite.cell
10X_P7_14_GGATTACCACGTCAGC	13	pericyte.cell
10X_P7_14_GGATTACGTAGAGCTG	16	skeletal.muscle.fibroblast..fibroblast
10X_P7_14_GGATTACGTCAACATC	18	myelinating.Schwann.cell
10X_P7_14_GGATTACTCCACTGGG	5	skeletal.muscle.satellite.cell
10X_P7_14_GGCAATTGTCAAAGAT	3	monocyte.derived.dendritic.cell
10X_P7_14_GGCAATTGTGCAGGTA	16	skeletal.muscle.fibroblast..fibroblast
10X_P7_14_GGCAATTGTGCATCTA	5	skeletal.muscle.satellite.cell
10X_P7_14_GGCCGATCAATGGACG	16	skeletal.muscle.fibroblast..fibroblast
10X_P7_14_GGCCGATCACGAAACG	7	B.cell
10X_P7_14_GGCGACTAGCTATGCT	12	blood.vessel.endothelial.cell
10X_P7_14_GGCGACTCATGGTCTA	10	endothelial.cell.of.artery
10X_P7_14_GGCGTGTAGAATAGGG	7	B.cell
10X_P7_14_GGCGTGTAGCGTAATA	16	skeletal.muscle.fibroblast..fibroblast
10X_P7_14_GGCGTGTAGTGGGTTG	5	skeletal.muscle.satellite.cell
10X_P7_14_GGCGTGTGTATGAAAC	7	B.cell
10X_P7_14_GGCGTGTGTCTGCAAT	7	B.cell
10X_P7_14_GGCGTGTTCCTTTCGG	5	skeletal.muscle.satellite.cell
10X_P7_14_GGCGTGTTCGCTGATA	12	blood.vessel.endothelial.cell
10X_P7_14_GGCTCGAAGACAAGCC	17	skeletal.muscle.fibroblast..fibroblast.1
10X_P7_14_GGCTCGAAGACTCGGA	10	endothelial.cell.of.artery
10X_P7_14_GGCTCGACACTAAGTC	12	blood.vessel.endothelial.cell
10X_P7_14_GGCTCGACAGGGATTG	17	skeletal.muscle.fibroblast..fibroblast.1
10X_P7_14_GGCTCGAGTGGTTTCA	16	skeletal.muscle.fibroblast..fibroblast
10X_P7_14_GGCTGGTGTAGCTGCC	16	skeletal.muscle.fibroblast..fibroblast
10X_P7_14_GGCTGGTGTCAACATC	7	B.cell
10X_P7_14_GGCTGGTTCCGAATGT	6	CD8.positive..alpha.beta.T.cell
10X_P7_14_GGCTGGTTCCTGCCAT	16	skeletal.muscle.fibroblast..fibroblast
10X_P7_14_GGGAATGAGAGGTTAT	19	smooth.muscle.cell
10X_P7_14_GGGAATGCAATGGTCT	7	B.cell
10X_P7_14_GGGACCTAGCCAGTTT	11	capillary.endothelial.cell
10X_P7_14_GGGACCTCACCACCAG	7	B.cell
10X_P7_14_GGGACCTGTAAATGAC	11	capillary.endothelial.cell
10X_P7_14_GGGACCTGTTCGTGAT	17	skeletal.muscle.fibroblast..fibroblast.1
10X_P7_14_GGGAGATAGTGTACGG	16	skeletal.muscle.fibroblast..fibroblast
10X_P7_14_GGGATGAAGCCAGTTT	10	endothelial.cell.of.artery
10X_P7_14_GGGATGAAGGCTAGGT	14	tendon.cell
10X_P7_14_GGGATGACACACTGCG	17	skeletal.muscle.fibroblast..fibroblast.1
10X_P7_14_GGGATGACACCTCGGA	13	pericyte.cell
10X_P7_14_GGGCACTAGAAGCCCA	12	blood.vessel.endothelial.cell
10X_P7_14_GGGCACTCATCCCACT	6	CD8.positive..alpha.beta.T.cell
10X_P7_14_GGGCACTGTGCCTGTG	16	skeletal.muscle.fibroblast..fibroblast
10X_P7_14_GGGCACTGTGCTAGCC	7	B.cell
10X_P7_14_GGGCATCAGAGCTATA	14	tendon.cell
10X_P7_14_GGGCATCCAAGTTCTG	7	B.cell
10X_P7_14_GGGCATCCACTTGGAT	7	B.cell
10X_P7_14_GGGTCTGAGACTTGAA	16	skeletal.muscle.fibroblast..fibroblast
10X_P7_14_GGGTCTGTCGAATGCT	16	skeletal.muscle.fibroblast..fibroblast
10X_P7_14_GGGTCTGTCTTGTTTG	7	B.cell
10X_P7_14_GGGTTGCAGTTCGCAT	16	skeletal.muscle.fibroblast..fibroblast
10X_P7_14_GGGTTGCCAAGCTGGA	2	macrophage
10X_P7_14_GGGTTGCCACAGACTT	13	pericyte.cell
10X_P7_14_GGGTTGCGTCCCTTGT	16	skeletal.muscle.fibroblast..fibroblast
10X_P7_14_GGGTTGCTCATCGATG	3	monocyte.derived.dendritic.cell
10X_P7_14_GGGTTGCTCCACGACG	7	B.cell
10X_P7_14_GGGTTGCTCCAGGGCT	6	CD8.positive..alpha.beta.T.cell
10X_P7_14_GGGTTGCTCGGATGGA	16	skeletal.muscle.fibroblast..fibroblast
10X_P7_14_GGGTTGCTCTAACTCT	10	endothelial.cell.of.artery
10X_P7_14_GGTATTGAGTTACCCA	3	monocyte.derived.dendritic.cell
10X_P7_14_GGTATTGCAACTGCGC	12	blood.vessel.endothelial.cell
10X_P7_14_GGTATTGCACTGAAGG	7	B.cell
10X_P7_14_GGTATTGCACTGTTAG	7	B.cell
10X_P7_14_GGTATTGCAGATCCAT	11	capillary.endothelial.cell
10X_P7_14_GGTATTGGTAGAAAGG	2	macrophage
10X_P7_14_GGTATTGGTCGGGTCT	13	pericyte.cell
10X_P7_14_GGTATTGTCCGCGGTA	5	skeletal.muscle.satellite.cell
10X_P7_14_GGTGAAGCACCTGGTG	6	CD8.positive..alpha.beta.T.cell
10X_P7_14_GGTGAAGGTCTTGATG	6	CD8.positive..alpha.beta.T.cell
10X_P7_14_GGTGAAGGTTCAGTAC	11	capillary.endothelial.cell
10X_P7_14_GGTGAAGGTTCTGGTA	18	myelinating.Schwann.cell
10X_P7_14_GGTGAAGGTTTGGGCC	5	skeletal.muscle.satellite.cell
10X_P7_14_GGTGAAGTCGTCCGTT	7	B.cell
10X_P7_14_GGTGAAGTCTCGAGTA	11	capillary.endothelial.cell
10X_P7_14_GGTGCGTCACGACGAA	2	macrophage
10X_P7_14_GGTGCGTCATCGTCGG	9	vein.endothelial.cell..endothelial.stalk.cell
10X_P7_14_GGTGCGTCATGACATC	9	vein.endothelial.cell..endothelial.stalk.cell
10X_P7_14_GGTGCGTTCGCCCTTA	16	skeletal.muscle.fibroblast..fibroblast
10X_P7_14_GGTGCGTTCTCGTATT	16	skeletal.muscle.fibroblast..fibroblast
10X_P7_14_GGTGTTAAGTCGATAA	15	stromal.cell
10X_P7_14_GGTGTTACACATGTGT	6	CD8.positive..alpha.beta.T.cell
10X_P7_14_GGTGTTACACGCCAGT	11	capillary.endothelial.cell
10X_P7_14_GGTGTTACAGTCAGCC	14	tendon.cell
10X_P7_14_GGTGTTATCAAGGCTT	8	endothelial.cell.of.lymphatic.vessel
10X_P7_14_GGTGTTATCTTATCTG	11	capillary.endothelial.cell
10X_P7_14_GGTGTTATCTTTAGGG	7	B.cell
10X_P7_14_GTAACGTCACTTAAGC	7	B.cell
10X_P7_14_GTAACGTGTGCGATAG	7	B.cell
10X_P7_14_GTAACGTTCGGTCTAA	7	B.cell
10X_P7_14_GTAACGTTCTTAACCT	7	B.cell
10X_P7_14_GTAACTGAGGCTCATT	16	skeletal.muscle.fibroblast..fibroblast
10X_P7_14_GTAACTGCAAGTACCT	6	CD8.positive..alpha.beta.T.cell
10X_P7_14_GTAACTGCATAGAAAC	6	CD8.positive..alpha.beta.T.cell
10X_P7_14_GTAACTGGTCAAAGAT	14	tendon.cell
10X_P7_14_GTAACTGGTCATGCCG	10	endothelial.cell.of.artery
10X_P7_14_GTAACTGTCAAACCGT	2	macrophage
10X_P7_14_GTAACTGTCAGAGACG	5	skeletal.muscle.satellite.cell
10X_P7_14_GTAACTGTCCAGTATG	14	tendon.cell
10X_P7_14_GTAACTGTCGGTCTAA	5	skeletal.muscle.satellite.cell
10X_P7_14_GTAACTGTCTGTGCAA	3	monocyte.derived.dendritic.cell
10X_P7_14_GTACGTAAGTTAACGA	2	macrophage
10X_P7_14_GTACGTACACTTAACG	16	skeletal.muscle.fibroblast..fibroblast
10X_P7_14_GTACTCCAGAACAATC	17	skeletal.muscle.fibroblast..fibroblast.1
10X_P7_14_GTACTCCAGACCACGA	7	B.cell
10X_P7_14_GTACTCCAGCAGCGTA	2	macrophage
10X_P7_14_GTACTCCCAAGGACTG	13	pericyte.cell
10X_P7_14_GTACTCCCATGGTCTA	11	capillary.endothelial.cell
10X_P7_14_GTACTCCGTACTTCTT	6	CD8.positive..alpha.beta.T.cell
10X_P7_14_GTACTTTAGGCATGTG	6	CD8.positive..alpha.beta.T.cell
10X_P7_14_GTACTTTCATAACCTG	12	blood.vessel.endothelial.cell
10X_P7_14_GTACTTTCATGGTCAT	16	skeletal.muscle.fibroblast..fibroblast
10X_P7_14_GTACTTTGTCGCGAAA	7	B.cell
10X_P7_14_GTACTTTGTGAGGCTA	12	blood.vessel.endothelial.cell
10X_P7_14_GTACTTTGTGGGTATG	2	macrophage
10X_P7_14_GTACTTTTCACCGTAA	12	blood.vessel.endothelial.cell
10X_P7_14_GTACTTTTCGCATGAT	17	skeletal.muscle.fibroblast..fibroblast.1
10X_P7_14_GTACTTTTCGTCCAGG	10	endothelial.cell.of.artery
10X_P7_14_GTAGGCCAGACAGAGA	7	B.cell
10X_P7_14_GTAGGCCGTACCGAGA	6	CD8.positive..alpha.beta.T.cell
10X_P7_14_GTAGGCCGTCCGTTAA	7	B.cell
10X_P7_14_GTAGGCCGTGCCTGGT	10	endothelial.cell.of.artery
10X_P7_14_GTAGGCCTCCCTCTTT	17	skeletal.muscle.fibroblast..fibroblast.1
10X_P7_14_GTAGGCCTCGTCACGG	11	capillary.endothelial.cell
10X_P7_14_GTAGTCAAGGACACCA	11	capillary.endothelial.cell
10X_P7_14_GTAGTCAAGTAACCCT	7	B.cell
10X_P7_14_GTAGTCAGTCGTTGTA	12	blood.vessel.endothelial.cell
10X_P7_14_GTAGTCATCGTACCGG	11	capillary.endothelial.cell
10X_P7_14_GTATCTTCACACCGCA	14	tendon.cell
10X_P7_14_GTATCTTCACCCATGG	17	skeletal.muscle.fibroblast..fibroblast.1
10X_P7_14_GTATCTTCACCGGAAA	11	capillary.endothelial.cell
10X_P7_14_GTATCTTGTACGACCC	11	capillary.endothelial.cell
10X_P7_14_GTATCTTGTGTTCTTT	7	B.cell
10X_P7_14_GTATCTTTCCGTTGCT	7	B.cell
10X_P7_14_GTATCTTTCTTGAGGT	9	vein.endothelial.cell..endothelial.stalk.cell
10X_P7_14_GTATTCTAGTTCGCAT	7	B.cell
10X_P7_14_GTATTCTGTAGAAAGG	16	skeletal.muscle.fibroblast..fibroblast
10X_P7_14_GTATTCTGTTCAGCGC	11	capillary.endothelial.cell
10X_P7_14_GTATTCTTCGTGTAGT	16	skeletal.muscle.fibroblast..fibroblast
10X_P7_14_GTATTCTTCTGGAGCC	7	B.cell
10X_P7_14_GTCAAGTAGGGCTCTC	7	B.cell
10X_P7_14_GTCAAGTCAAGCCGCT	10	endothelial.cell.of.artery
10X_P7_14_GTCAAGTCAATGGATA	16	skeletal.muscle.fibroblast..fibroblast
10X_P7_14_GTCAAGTCACACATGT	5	skeletal.muscle.satellite.cell
10X_P7_14_GTCAAGTCAGGAATGC	17	skeletal.muscle.fibroblast..fibroblast.1
10X_P7_14_GTCAAGTCATTGGCGC	10	endothelial.cell.of.artery
10X_P7_14_GTCAAGTGTTGGTGGA	12	blood.vessel.endothelial.cell
10X_P7_14_GTCACAAAGGTACTCT	11	capillary.endothelial.cell
10X_P7_14_GTCACAAAGTTATCGC	16	skeletal.muscle.fibroblast..fibroblast
10X_P7_14_GTCACGGAGTTGCAGG	16	skeletal.muscle.fibroblast..fibroblast
10X_P7_14_GTCACGGCAATGGAGC	12	blood.vessel.endothelial.cell
10X_P7_14_GTCACGGCAGCTCGCA	7	B.cell
10X_P7_14_GTCACGGGTCCGAGTC	7	B.cell
10X_P7_14_GTCACGGGTGGGTATG	2	macrophage
10X_P7_14_GTCACGGGTGTGGCTC	14	tendon.cell
10X_P7_14_GTCACGGGTTCCCTTG	10	endothelial.cell.of.artery
10X_P7_14_GTCATTTGTATTCGTG	16	skeletal.muscle.fibroblast..fibroblast
10X_P7_14_GTCATTTGTCGGATCC	3	monocyte.derived.dendritic.cell
10X_P7_14_GTCCTCAAGACAGGCT	7	B.cell
10X_P7_14_GTCCTCAAGACCTAGG	5	skeletal.muscle.satellite.cell
10X_P7_14_GTCCTCAAGGAATCGC	11	capillary.endothelial.cell
10X_P7_14_GTCCTCAGTTGGTGGA	12	blood.vessel.endothelial.cell
10X_P7_14_GTCCTCATCACCCGAG	6	CD8.positive..alpha.beta.T.cell
10X_P7_14_GTCCTCATCACCGTAA	16	skeletal.muscle.fibroblast..fibroblast
10X_P7_14_GTCGGGTAGGAATGGA	14	tendon.cell
10X_P7_14_GTCGGGTCACCCATTC	2	macrophage
10X_P7_14_GTCGGGTCATCCCACT	7	B.cell
10X_P7_14_GTCGGGTGTTACGACT	5	skeletal.muscle.satellite.cell
10X_P7_14_GTCGGGTTCAAACCGT	16	skeletal.muscle.fibroblast..fibroblast
10X_P7_14_GTCGGGTTCATCATTC	16	skeletal.muscle.fibroblast..fibroblast
10X_P7_14_GTCGGGTTCCAAGTAC	11	capillary.endothelial.cell
10X_P7_14_GTCGGGTTCTGTTTGT	16	skeletal.muscle.fibroblast..fibroblast
10X_P7_14_GTCGTAAAGAACTCGG	4	T.helper.17.cell
10X_P7_14_GTCGTAACACGGTAGA	12	blood.vessel.endothelial.cell
10X_P7_14_GTCGTAACAGCAGTTT	7	B.cell
10X_P7_14_GTCGTAAGTAAGAGGA	7	B.cell
10X_P7_14_GTCTCGTAGCTTTGGT	14	tendon.cell
10X_P7_14_GTCTCGTCAAAGGAAG	16	skeletal.muscle.fibroblast..fibroblast
10X_P7_14_GTCTCGTTCAGGCCCA	13	pericyte.cell
10X_P7_14_GTCTCGTTCTAACTTC	7	B.cell
10X_P7_14_GTCTTCGCATAGAAAC	5	skeletal.muscle.satellite.cell
10X_P7_14_GTGAAGGAGCCAGGAT	6	CD8.positive..alpha.beta.T.cell
10X_P7_14_GTGAAGGAGGCTCATT	11	capillary.endothelial.cell
10X_P7_14_GTGAAGGAGTACTTGC	11	capillary.endothelial.cell
10X_P7_14_GTGAAGGTCCCTAATT	16	skeletal.muscle.fibroblast..fibroblast
10X_P7_14_GTGAAGGTCTTCGGTC	16	skeletal.muscle.fibroblast..fibroblast
10X_P7_14_GTGCAGCAGCCGTCGT	16	skeletal.muscle.fibroblast..fibroblast
10X_P7_14_GTGCAGCAGTAGCCGA	11	capillary.endothelial.cell
10X_P7_14_GTGCAGCAGTATCTCG	14	tendon.cell
10X_P7_14_GTGCAGCGTCTCACCT	5	skeletal.muscle.satellite.cell
10X_P7_14_GTGCAGCGTTAAGGGC	12	blood.vessel.endothelial.cell
10X_P7_14_GTGCATAAGACAGGCT	10	endothelial.cell.of.artery
10X_P7_14_GTGCATACAAGCTGGA	7	B.cell
10X_P7_14_GTGCATACAGCTGTTA	5	skeletal.muscle.satellite.cell
10X_P7_14_GTGCATAGTAATAGCA	16	skeletal.muscle.fibroblast..fibroblast
10X_P7_14_GTGCATAGTGCCTTGG	14	tendon.cell
10X_P7_14_GTGCGGTCATTTGCTT	9	vein.endothelial.cell..endothelial.stalk.cell
10X_P7_14_GTGCGGTGTAAGTAGT	16	skeletal.muscle.fibroblast..fibroblast
10X_P7_14_GTGCGGTGTTTGTTGG	3	monocyte.derived.dendritic.cell
10X_P7_14_GTGCGGTTCAACACTG	11	capillary.endothelial.cell
10X_P7_14_GTGCTTCAGCACAGGT	8	endothelial.cell.of.lymphatic.vessel
10X_P7_14_GTGCTTCCAGCGTCCA	17	skeletal.muscle.fibroblast..fibroblast.1
10X_P7_14_GTGCTTCGTGACTCAT	7	B.cell
10X_P7_14_GTGCTTCTCTCATTCA	4	T.helper.17.cell
10X_P7_14_GTGGGTCAGCCAGGAT	16	skeletal.muscle.fibroblast..fibroblast
10X_P7_14_GTGGGTCCATCCCACT	16	skeletal.muscle.fibroblast..fibroblast
10X_P7_14_GTGGGTCTCAAGGTAA	10	endothelial.cell.of.artery
10X_P7_14_GTGGGTCTCTAACTTC	12	blood.vessel.endothelial.cell
10X_P7_14_GTGTGCGAGTGGGATC	16	skeletal.muscle.fibroblast..fibroblast
10X_P7_14_GTGTGCGCAAACCCAT	6	CD8.positive..alpha.beta.T.cell
10X_P7_14_GTGTGCGCATTCCTCG	7	B.cell
10X_P7_14_GTGTGCGGTACTCTCC	16	skeletal.muscle.fibroblast..fibroblast
10X_P7_14_GTGTGCGGTACTTCTT	13	pericyte.cell
10X_P7_14_GTGTGCGGTCGGATCC	17	skeletal.muscle.fibroblast..fibroblast.1
10X_P7_14_GTGTGCGGTCTCCATC	5	skeletal.muscle.satellite.cell
10X_P7_14_GTGTTAGAGAATGTGT	17	skeletal.muscle.fibroblast..fibroblast.1
10X_P7_14_GTGTTAGAGAGCCTAG	10	endothelial.cell.of.artery
10X_P7_14_GTGTTAGAGAGGGATA	16	skeletal.muscle.fibroblast..fibroblast
10X_P7_14_GTGTTAGAGATAGTCA	17	skeletal.muscle.fibroblast..fibroblast.1
10X_P7_14_GTGTTAGCACGGTGTC	6	CD8.positive..alpha.beta.T.cell
10X_P7_14_GTGTTAGGTATAGGTA	6	CD8.positive..alpha.beta.T.cell
10X_P7_14_GTGTTAGGTATTCGTG	13	pericyte.cell
10X_P7_14_GTGTTAGTCGCTTAGA	17	skeletal.muscle.fibroblast..fibroblast.1
10X_P7_14_GTTAAGCAGGAGCGAG	10	endothelial.cell.of.artery
10X_P7_14_GTTAAGCCAAGCGAGT	16	skeletal.muscle.fibroblast..fibroblast
10X_P7_14_GTTAAGCGTAGGCATG	12	blood.vessel.endothelial.cell
10X_P7_14_GTTAAGCGTCGCTTTC	12	blood.vessel.endothelial.cell
10X_P7_14_GTTAAGCGTCGTTGTA	12	blood.vessel.endothelial.cell
10X_P7_14_GTTAAGCGTGATAAGT	7	B.cell
10X_P7_14_GTTAAGCTCTCTGAGA	17	skeletal.muscle.fibroblast..fibroblast.1
10X_P7_14_GTTACAGAGGTGGGTT	13	pericyte.cell
10X_P7_14_GTTACAGGTAGCACGA	18	myelinating.Schwann.cell
10X_P7_14_GTTACAGGTGATAAGT	12	blood.vessel.endothelial.cell
10X_P7_14_GTTACAGGTGCAGACA	13	pericyte.cell
10X_P7_14_GTTACAGTCTTGGGTA	5	skeletal.muscle.satellite.cell
10X_P7_14_GTTCATTAGTACACCT	6	CD8.positive..alpha.beta.T.cell
10X_P7_14_GTTCATTGTAATAGCA	7	B.cell
10X_P7_14_GTTCGGGAGTGGGCTA	17	skeletal.muscle.fibroblast..fibroblast.1
10X_P7_14_GTTCGGGAGTTCGCGC	16	skeletal.muscle.fibroblast..fibroblast
10X_P7_14_GTTCGGGGTCAATGTC	14	tendon.cell
10X_P7_14_GTTCGGGGTTGCGCAC	6	CD8.positive..alpha.beta.T.cell
10X_P7_14_GTTCGGGTCTTAGCCC	7	B.cell
10X_P7_14_GTTCTCGAGACTTTCG	6	CD8.positive..alpha.beta.T.cell
10X_P7_14_GTTCTCGAGGTGGGTT	17	skeletal.muscle.fibroblast..fibroblast.1
10X_P7_14_GTTCTCGCACAAGCCC	6	CD8.positive..alpha.beta.T.cell
10X_P7_14_GTTCTCGGTAACGTTC	6	CD8.positive..alpha.beta.T.cell
10X_P7_14_GTTCTCGGTCATGCCG	14	tendon.cell
10X_P7_14_GTTCTCGGTTCGAATC	17	skeletal.muscle.fibroblast..fibroblast.1
10X_P7_14_GTTCTCGTCACCATAG	14	tendon.cell
10X_P7_14_GTTTCTACAGGGTACA	11	capillary.endothelial.cell
10X_P7_14_GTTTCTACAGTTAACC	13	pericyte.cell
10X_P7_14_GTTTCTACATGCCACG	11	capillary.endothelial.cell
10X_P7_14_GTTTCTAGTAAGTGGC	13	pericyte.cell
10X_P7_14_TAAACCGAGTATCGAA	16	skeletal.muscle.fibroblast..fibroblast
10X_P7_14_TAAACCGAGTTCGATC	7	B.cell
10X_P7_14_TAAACCGTCAAAGACA	10	endothelial.cell.of.artery
10X_P7_14_TAAACCGTCATAACCG	12	blood.vessel.endothelial.cell
10X_P7_14_TAAACCGTCGGAGGTA	16	skeletal.muscle.fibroblast..fibroblast
10X_P7_14_TAAACCGTCTTGCCGT	10	endothelial.cell.of.artery
10X_P7_14_TAAGAGAAGCAGGTCA	16	skeletal.muscle.fibroblast..fibroblast
10X_P7_14_TAAGAGACAAGCGTAG	3	monocyte.derived.dendritic.cell
10X_P7_14_TAAGAGACAATGGATA	14	tendon.cell
10X_P7_14_TAAGAGACAGGTGCCT	7	B.cell
10X_P7_14_TAAGAGACATCCTAGA	13	pericyte.cell
10X_P7_14_TAAGAGACATGCCTAA	5	skeletal.muscle.satellite.cell
10X_P7_14_TAAGAGAGTGGTTTCA	7	B.cell
10X_P7_14_TAAGAGAGTTAAGGGC	10	endothelial.cell.of.artery
10X_P7_14_TAAGAGATCCTTGGTC	11	capillary.endothelial.cell
10X_P7_14_TAAGAGATCGTTACGA	5	skeletal.muscle.satellite.cell
10X_P7_14_TAAGCGTAGCCTCGTG	16	skeletal.muscle.fibroblast..fibroblast
10X_P7_14_TAAGCGTGTGATAAAC	5	skeletal.muscle.satellite.cell
10X_P7_14_TAAGCGTGTGCAGACA	7	B.cell
10X_P7_14_TAAGCGTGTTCGCGAC	14	tendon.cell
10X_P7_14_TAAGTGCAGAGGTAGA	12	blood.vessel.endothelial.cell
10X_P7_14_TAAGTGCAGGCGATAC	16	skeletal.muscle.fibroblast..fibroblast
10X_P7_14_TAAGTGCCAACCGCCA	11	capillary.endothelial.cell
10X_P7_14_TAAGTGCCAAGCGAGT	16	skeletal.muscle.fibroblast..fibroblast
10X_P7_14_TAAGTGCGTAGCACGA	7	B.cell
10X_P7_14_TAAGTGCGTCTCACCT	16	skeletal.muscle.fibroblast..fibroblast
10X_P7_14_TAAGTGCGTGGGTCAA	16	skeletal.muscle.fibroblast..fibroblast
10X_P7_14_TACACGACAACGATCT	16	skeletal.muscle.fibroblast..fibroblast
10X_P7_14_TACACGACAAGGACTG	5	skeletal.muscle.satellite.cell
10X_P7_14_TACACGATCAACACCA	13	pericyte.cell
10X_P7_14_TACAGTGAGAGTGAGA	12	blood.vessel.endothelial.cell
10X_P7_14_TACAGTGAGATATGCA	7	B.cell
10X_P7_14_TACAGTGAGTTCGATC	12	blood.vessel.endothelial.cell
10X_P7_14_TACAGTGCATATGGTC	3	monocyte.derived.dendritic.cell
10X_P7_14_TACAGTGGTGGCCCTA	12	blood.vessel.endothelial.cell
10X_P7_14_TACAGTGGTTCAGGCC	12	blood.vessel.endothelial.cell
10X_P7_14_TACAGTGGTTGTACAC	6	CD8.positive..alpha.beta.T.cell
10X_P7_14_TACCTATCACCTATCC	11	capillary.endothelial.cell
10X_P7_14_TACCTATGTAAACGCG	16	skeletal.muscle.fibroblast..fibroblast
10X_P7_14_TACCTATGTTAAGACA	5	skeletal.muscle.satellite.cell
10X_P7_14_TACCTATTCACATACG	5	skeletal.muscle.satellite.cell
10X_P7_14_TACCTATTCGAGGTAG	6	CD8.positive..alpha.beta.T.cell
10X_P7_14_TACCTTAAGAAACCTA	7	B.cell
10X_P7_14_TACCTTAAGGCTAGAC	2	macrophage
10X_P7_14_TACCTTAAGGGTTTCT	16	skeletal.muscle.fibroblast..fibroblast
10X_P7_14_TACCTTACAACCGCCA	11	capillary.endothelial.cell
10X_P7_14_TACCTTACACTGTGTA	6	CD8.positive..alpha.beta.T.cell
10X_P7_14_TACCTTAGTCGAAAGC	2	macrophage
10X_P7_14_TACGGATAGCACCGCT	12	blood.vessel.endothelial.cell
10X_P7_14_TACGGATAGCGATATA	10	endothelial.cell.of.artery
10X_P7_14_TACGGATCACCAGATT	7	B.cell
10X_P7_14_TACGGATCATGGGAAC	16	skeletal.muscle.fibroblast..fibroblast
10X_P7_14_TACGGATGTCCATGAT	16	skeletal.muscle.fibroblast..fibroblast
10X_P7_14_TACGGATGTTACCGAT	11	capillary.endothelial.cell
10X_P7_14_TACGGGCAGTTCCACA	14	tendon.cell
10X_P7_14_TACGGGCCAAAGGTGC	5	skeletal.muscle.satellite.cell
10X_P7_14_TACGGGCCATGATCCA	14	tendon.cell
10X_P7_14_TACGGGCGTCTCGTTC	11	capillary.endothelial.cell
10X_P7_14_TACGGGCTCCAAGCCG	13	pericyte.cell
10X_P7_14_TACGGGCTCGGAAACG	11	capillary.endothelial.cell
10X_P7_14_TACGGGCTCTTGTACT	12	blood.vessel.endothelial.cell
10X_P7_14_TACGGTACAGTGAGTG	11	capillary.endothelial.cell
10X_P7_14_TACTCATGTCTCCCTA	7	B.cell
10X_P7_14_TACTCATGTTATCGGT	11	capillary.endothelial.cell
10X_P7_14_TACTCATTCAGCTGGC	16	skeletal.muscle.fibroblast..fibroblast
10X_P7_14_TACTCATTCCGCTGTT	11	capillary.endothelial.cell
10X_P7_14_TACTCGCAGACAATAC	12	blood.vessel.endothelial.cell
10X_P7_14_TACTCGCAGATATGGT	17	skeletal.muscle.fibroblast..fibroblast.1
10X_P7_14_TACTCGCAGATCGATA	11	capillary.endothelial.cell
10X_P7_14_TACTCGCCAAACAACA	11	capillary.endothelial.cell
10X_P7_14_TACTCGCCAGGTCTCG	9	vein.endothelial.cell..endothelial.stalk.cell
10X_P7_14_TACTCGCCAGTTTACG	16	skeletal.muscle.fibroblast..fibroblast
10X_P7_14_TACTCGCGTATCACCA	2	macrophage
10X_P7_14_TACTCGCGTCAACTGT	9	vein.endothelial.cell..endothelial.stalk.cell
10X_P7_14_TACTCGCTCACCCTCA	7	B.cell
10X_P7_14_TACTCGCTCGATGAGG	2	macrophage
10X_P7_14_TACTCGCTCGCAAGCC	16	skeletal.muscle.fibroblast..fibroblast
10X_P7_14_TACTTACAGCTAGGCA	16	skeletal.muscle.fibroblast..fibroblast
10X_P7_14_TACTTACGTCAGAATA	16	skeletal.muscle.fibroblast..fibroblast
10X_P7_14_TACTTACGTTCCACTC	6	CD8.positive..alpha.beta.T.cell
10X_P7_14_TACTTACTCCTCATTA	7	B.cell
10X_P7_14_TACTTGTAGCAGACTG	6	CD8.positive..alpha.beta.T.cell
10X_P7_14_TACTTGTAGCGCTTAT	9	vein.endothelial.cell..endothelial.stalk.cell
10X_P7_14_TACTTGTCATATACGC	5	skeletal.muscle.satellite.cell
10X_P7_14_TAGACCAAGACGCACA	11	capillary.endothelial.cell
10X_P7_14_TAGACCAGTAGGCATG	9	vein.endothelial.cell..endothelial.stalk.cell
10X_P7_14_TAGACCAGTTCGTGAT	14	tendon.cell
10X_P7_14_TAGACCATCGTCGTTC	16	skeletal.muscle.fibroblast..fibroblast
10X_P7_14_TAGAGCTAGGATGGTC	6	CD8.positive..alpha.beta.T.cell
10X_P7_14_TAGAGCTGTCACACGC	3	monocyte.derived.dendritic.cell
10X_P7_14_TAGAGCTGTCCAGTAT	7	B.cell
10X_P7_14_TAGAGCTGTCCTCTTG	5	skeletal.muscle.satellite.cell
10X_P7_14_TAGAGCTGTTGGGACA	11	capillary.endothelial.cell
10X_P7_14_TAGAGCTTCACTTACT	3	monocyte.derived.dendritic.cell
10X_P7_14_TAGAGCTTCCAAACAC	14	tendon.cell
10X_P7_14_TAGAGCTTCTTGCATT	11	capillary.endothelial.cell
10X_P7_14_TAGCCGGAGTACGTAA	16	skeletal.muscle.fibroblast..fibroblast
10X_P7_14_TAGCCGGCACCGAATT	14	tendon.cell
10X_P7_14_TAGCCGGTCTGCTGCT	11	capillary.endothelial.cell
10X_P7_14_TAGGCATAGGTGATAT	7	B.cell
10X_P7_14_TAGGCATAGTCCTCCT	7	B.cell
10X_P7_14_TAGGCATCAAGTTGTC	7	B.cell
10X_P7_14_TAGGCATCAGTTCCCT	7	B.cell
10X_P7_14_TAGGCATTCAGTGTTG	3	monocyte.derived.dendritic.cell
10X_P7_14_TAGGCATTCCGGCACA	12	blood.vessel.endothelial.cell
10X_P7_14_TAGTGGTCAATCAGAA	9	vein.endothelial.cell..endothelial.stalk.cell
10X_P7_14_TAGTGGTGTAAGAGGA	5	skeletal.muscle.satellite.cell
10X_P7_14_TAGTGGTGTAGGACAC	17	skeletal.muscle.fibroblast..fibroblast.1
10X_P7_14_TAGTGGTTCTGGCGTG	17	skeletal.muscle.fibroblast..fibroblast.1
10X_P7_14_TAGTTGGAGATATGGT	3	monocyte.derived.dendritic.cell
10X_P7_14_TAGTTGGGTAAACCTC	16	skeletal.muscle.fibroblast..fibroblast
10X_P7_14_TAGTTGGGTCTACCTC	16	skeletal.muscle.fibroblast..fibroblast
10X_P7_14_TAGTTGGGTCTGCGGT	12	blood.vessel.endothelial.cell
10X_P7_14_TAGTTGGGTGCACTTA	5	skeletal.muscle.satellite.cell
10X_P7_14_TAGTTGGTCAAGATCC	3	monocyte.derived.dendritic.cell
10X_P7_14_TAGTTGGTCCTGCCAT	18	myelinating.Schwann.cell
10X_P7_14_TATCAGGCATTTCAGG	1	striated.muscle.cell
10X_P7_14_TATCAGGGTAGCCTCG	11	capillary.endothelial.cell
10X_P7_14_TATCTCACAAAGGCGT	11	capillary.endothelial.cell
10X_P7_14_TATCTCAGTACTTAGC	5	skeletal.muscle.satellite.cell
10X_P7_14_TATCTCAGTCTTCTCG	10	endothelial.cell.of.artery
10X_P7_14_TATCTCATCGCATGAT	9	vein.endothelial.cell..endothelial.stalk.cell
10X_P7_14_TATGCCCAGATGCGAC	14	tendon.cell
10X_P7_14_TATGCCCAGGCTACGA	6	CD8.positive..alpha.beta.T.cell
10X_P7_14_TATGCCCGTCAAAGCG	11	capillary.endothelial.cell
10X_P7_14_TATTACCAGGCAATTA	3	monocyte.derived.dendritic.cell
10X_P7_14_TATTACCCAATGTTGC	14	tendon.cell
10X_P7_14_TATTACCCATCGGTTA	16	skeletal.muscle.fibroblast..fibroblast
10X_P7_14_TCAACGAAGCAATATG	16	skeletal.muscle.fibroblast..fibroblast
10X_P7_14_TCAACGACACTGCCAG	16	skeletal.muscle.fibroblast..fibroblast
10X_P7_14_TCAACGACATTGCGGC	11	capillary.endothelial.cell
10X_P7_14_TCAACGAGTAAGTAGT	14	tendon.cell
10X_P7_14_TCAATCTAGGAGCGTT	6	CD8.positive..alpha.beta.T.cell
10X_P7_14_TCAATCTAGTACACCT	14	tendon.cell
10X_P7_14_TCAATCTCACGAAGCA	3	monocyte.derived.dendritic.cell
10X_P7_14_TCAATCTTCGACAGCC	6	CD8.positive..alpha.beta.T.cell
10X_P7_14_TCACAAGAGGAACTGC	10	endothelial.cell.of.artery
10X_P7_14_TCACAAGAGGCCGAAT	11	capillary.endothelial.cell
10X_P7_14_TCACAAGAGGCTCAGA	12	blood.vessel.endothelial.cell
10X_P7_14_TCACAAGAGTCAAGGC	11	capillary.endothelial.cell
10X_P7_14_TCACAAGAGTGAACAT	4	T.helper.17.cell
10X_P7_14_TCACAAGCATGCAACT	16	skeletal.muscle.fibroblast..fibroblast
10X_P7_14_TCACAAGGTTGCTCCT	5	skeletal.muscle.satellite.cell
10X_P7_14_TCACAAGTCCGCGGTA	16	skeletal.muscle.fibroblast..fibroblast
10X_P7_14_TCACAAGTCTGATTCT	7	B.cell
10X_P7_14_TCACGAACACACCGAC	7	B.cell
10X_P7_14_TCACGAACATTGAGCT	11	capillary.endothelial.cell
10X_P7_14_TCACGAAGTGACTCAT	16	skeletal.muscle.fibroblast..fibroblast
10X_P7_14_TCACGAATCCACGTTC	16	skeletal.muscle.fibroblast..fibroblast
10X_P7_14_TCACGAATCCTCAACC	6	CD8.positive..alpha.beta.T.cell
10X_P7_14_TCACGAATCGTTTAGG	4	T.helper.17.cell
10X_P7_14_TCAGATGAGACGCACA	7	B.cell
10X_P7_14_TCAGATGAGCTCTCGG	11	capillary.endothelial.cell
10X_P7_14_TCAGATGCACCCTATC	16	skeletal.muscle.fibroblast..fibroblast
10X_P7_14_TCAGATGGTCACAAGG	14	tendon.cell
10X_P7_14_TCAGATGGTGGTTTCA	17	skeletal.muscle.fibroblast..fibroblast.1
10X_P7_14_TCAGATGTCACCCGAG	16	skeletal.muscle.fibroblast..fibroblast
10X_P7_14_TCAGATGTCCCTAATT	11	capillary.endothelial.cell
10X_P7_14_TCAGCAAAGATGGGTC	17	skeletal.muscle.fibroblast..fibroblast.1
10X_P7_14_TCAGCAACAATTGCTG	14	tendon.cell
10X_P7_14_TCAGCAACATATACGC	9	vein.endothelial.cell..endothelial.stalk.cell
10X_P7_14_TCAGCAACATCGATGT	16	skeletal.muscle.fibroblast..fibroblast
10X_P7_14_TCAGCAACATGACGGA	13	pericyte.cell
10X_P7_14_TCAGCAAGTGAGGGAG	10	endothelial.cell.of.artery
10X_P7_14_TCAGCAATCAAAGTAG	7	B.cell
10X_P7_14_TCAGCAATCACCTCGT	16	skeletal.muscle.fibroblast..fibroblast
10X_P7_14_TCAGCTCAGACACTAA	7	B.cell
10X_P7_14_TCAGCTCAGGGTTTCT	12	blood.vessel.endothelial.cell
10X_P7_14_TCAGCTCCACAGGCCT	16	skeletal.muscle.fibroblast..fibroblast
10X_P7_14_TCAGCTCCACGCGAAA	6	CD8.positive..alpha.beta.T.cell
10X_P7_14_TCAGCTCCAGAGTGTG	16	skeletal.muscle.fibroblast..fibroblast
10X_P7_14_TCAGCTCCATTAGCCA	5	skeletal.muscle.satellite.cell
10X_P7_14_TCAGCTCGTACCATCA	2	macrophage
10X_P7_14_TCAGCTCGTCACCTAA	10	endothelial.cell.of.artery
10X_P7_14_TCAGCTCGTCGTCTTC	16	skeletal.muscle.fibroblast..fibroblast
10X_P7_14_TCAGCTCTCATGTGGT	16	skeletal.muscle.fibroblast..fibroblast
10X_P7_14_TCAGGATAGCTAGGCA	12	blood.vessel.endothelial.cell
10X_P7_14_TCAGGATGTGTAAGTA	16	skeletal.muscle.fibroblast..fibroblast
10X_P7_14_TCAGGATTCCCAACGG	17	skeletal.muscle.fibroblast..fibroblast.1
10X_P7_14_TCAGGTACACACAGAG	4	T.helper.17.cell
10X_P7_14_TCAGGTACACCATGTA	7	B.cell
10X_P7_14_TCAGGTACAGATTGCT	9	vein.endothelial.cell..endothelial.stalk.cell
10X_P7_14_TCAGGTACATACTCTT	11	capillary.endothelial.cell
10X_P7_14_TCAGGTATCTCGCATC	7	B.cell
10X_P7_14_TCATTACAGGAGTACC	1	striated.muscle.cell
10X_P7_14_TCATTACAGGGCTCTC	6	CD8.positive..alpha.beta.T.cell
10X_P7_14_TCATTACAGTGCGTGA	2	macrophage
10X_P7_14_TCATTACAGTGTGAAT	5	skeletal.muscle.satellite.cell
10X_P7_14_TCATTACGTACCGTTA	11	capillary.endothelial.cell
10X_P7_14_TCATTACGTCTGGAGA	7	B.cell
10X_P7_14_TCATTACTCAAAGTAG	10	endothelial.cell.of.artery
10X_P7_14_TCATTTGAGCCACTAT	16	skeletal.muscle.fibroblast..fibroblast
10X_P7_14_TCATTTGCAGTCAGAG	16	skeletal.muscle.fibroblast..fibroblast
10X_P7_14_TCATTTGGTACTCGCG	16	skeletal.muscle.fibroblast..fibroblast
10X_P7_14_TCATTTGGTCTGATTG	11	capillary.endothelial.cell
10X_P7_14_TCATTTGGTGTGAAAT	14	tendon.cell
10X_P7_14_TCATTTGTCATGTGGT	11	capillary.endothelial.cell
10X_P7_14_TCATTTGTCGGGAGTA	7	B.cell
10X_P7_14_TCATTTGTCTCTGTCG	14	tendon.cell
10X_P7_14_TCCACACTCGCATGGC	13	pericyte.cell
10X_P7_14_TCCCGATAGCACCGTC	16	skeletal.muscle.fibroblast..fibroblast
10X_P7_14_TCCCGATCAAGCGATG	16	skeletal.muscle.fibroblast..fibroblast
10X_P7_14_TCCCGATCATGGTTGT	14	tendon.cell
10X_P7_14_TCCCGATTCTAACCGA	9	vein.endothelial.cell..endothelial.stalk.cell
10X_P7_14_TCCCGATTCTCCTATA	2	macrophage
10X_P7_14_TCGAGGCCAATGGTCT	16	skeletal.muscle.fibroblast..fibroblast
10X_P7_14_TCGAGGCGTCGAAAGC	2	macrophage
10X_P7_14_TCGAGGCGTCTGCGGT	16	skeletal.muscle.fibroblast..fibroblast
10X_P7_14_TCGCGAGAGCAGGCTA	10	endothelial.cell.of.artery
10X_P7_14_TCGCGAGAGCTCCCAG	6	CD8.positive..alpha.beta.T.cell
10X_P7_14_TCGCGAGAGTCTCGGC	3	monocyte.derived.dendritic.cell
10X_P7_14_TCGCGAGAGTGGAGTC	13	pericyte.cell
10X_P7_14_TCGCGAGAGTTGAGTA	2	macrophage
10X_P7_14_TCGCGAGCACAGGTTT	13	pericyte.cell
10X_P7_14_TCGCGAGCACCAGTTA	16	skeletal.muscle.fibroblast..fibroblast
10X_P7_14_TCGCGAGGTGCAACGA	7	B.cell
10X_P7_14_TCGCGAGTCGCTGATA	2	macrophage
10X_P7_14_TCGCGTTAGTACGTAA	12	blood.vessel.endothelial.cell
10X_P7_14_TCGCGTTCACTTACGA	16	skeletal.muscle.fibroblast..fibroblast
10X_P7_14_TCGCGTTGTTGATTCG	13	pericyte.cell
10X_P7_14_TCGCGTTTCCTATGTT	16	skeletal.muscle.fibroblast..fibroblast
10X_P7_14_TCGCGTTTCTAAGCCA	5	skeletal.muscle.satellite.cell
10X_P7_14_TCGGGACTCACCACCT	2	macrophage
10X_P7_14_TCGGGACTCCAGAAGG	16	skeletal.muscle.fibroblast..fibroblast
10X_P7_14_TCGGTAAAGTGGCACA	16	skeletal.muscle.fibroblast..fibroblast
10X_P7_14_TCGGTAACATACTCTT	5	skeletal.muscle.satellite.cell
10X_P7_14_TCGGTAATCGGTTAAC	7	B.cell
10X_P7_14_TCGGTAATCTTGCATT	17	skeletal.muscle.fibroblast..fibroblast.1
10X_P7_14_TCGTACCAGGTAAACT	1	striated.muscle.cell
10X_P7_14_TCGTACCCACCGAATT	16	skeletal.muscle.fibroblast..fibroblast
10X_P7_14_TCGTACCCAGACAAAT	10	endothelial.cell.of.artery
10X_P7_14_TCGTACCGTACATCCA	11	capillary.endothelial.cell
10X_P7_14_TCGTACCGTCCAGTGC	14	tendon.cell
10X_P7_14_TCGTACCGTTCCACGG	12	blood.vessel.endothelial.cell
10X_P7_14_TCGTACCTCACCTTAT	13	pericyte.cell
10X_P7_14_TCGTAGATCCTTGGTC	17	skeletal.muscle.fibroblast..fibroblast.1
10X_P7_14_TCGTAGATCTTAGAGC	6	CD8.positive..alpha.beta.T.cell
10X_P7_14_TCTATTGAGTGACTCT	6	CD8.positive..alpha.beta.T.cell
10X_P7_14_TCTATTGCAAGGGTCA	16	skeletal.muscle.fibroblast..fibroblast
10X_P7_14_TCTATTGCAGACACTT	12	blood.vessel.endothelial.cell
10X_P7_14_TCTATTGGTTGTCGCG	3	monocyte.derived.dendritic.cell
10X_P7_14_TCTCATACATCGGTTA	10	endothelial.cell.of.artery
10X_P7_14_TCTCATAGTAAGAGGA	10	endothelial.cell.of.artery
10X_P7_14_TCTCATAGTAATCACC	16	skeletal.muscle.fibroblast..fibroblast
10X_P7_14_TCTCATATCAGGTAAA	16	skeletal.muscle.fibroblast..fibroblast
10X_P7_14_TCTCATATCCTGTAGA	6	CD8.positive..alpha.beta.T.cell
10X_P7_14_TCTCTAAAGCCGATTT	14	tendon.cell
10X_P7_14_TCTCTAACAAGTCTAC	16	skeletal.muscle.fibroblast..fibroblast
10X_P7_14_TCTCTAATCGGTCCGA	6	CD8.positive..alpha.beta.T.cell
10X_P7_14_TCTGAGAAGCGATAGC	7	B.cell
10X_P7_14_TCTGAGACAAACGTGG	14	tendon.cell
10X_P7_14_TCTGAGACACAACGTT	3	monocyte.derived.dendritic.cell
10X_P7_14_TCTGAGACATTACCTT	10	endothelial.cell.of.artery
10X_P7_14_TCTGAGATCCTCGCAT	17	skeletal.muscle.fibroblast..fibroblast.1
10X_P7_14_TCTGAGATCTAACTGG	14	tendon.cell
10X_P7_14_TCTGAGATCTGCCAGG	7	B.cell
10X_P7_14_TCTGAGATCTTGAGGT	4	T.helper.17.cell
[truncated: 2,538 more rows]

## Sheet: Spleen
Supplementary File 4E. Mouse cell clusters annotations in spleen.
Cell index	Cluster no.	Cell Ontology term
10X_P4_7_AAACCTGAGAAGGACA	11	marginal.zone.B.cell.of.spleen
10X_P4_7_AAACCTGAGCTAAGAT	8	natural.killer.cell
10X_P4_7_AAACCTGCAACAACCT	11	marginal.zone.B.cell.of.spleen
10X_P4_7_AAACCTGCAGCCAATT	11	marginal.zone.B.cell.of.spleen
10X_P4_7_AAACCTGCAGCTCCGA	11	marginal.zone.B.cell.of.spleen
10X_P4_7_AAACCTGTCAGGTAAA	11	marginal.zone.B.cell.of.spleen
10X_P4_7_AAACGGGAGACACGAC	11	marginal.zone.B.cell.of.spleen
10X_P4_7_AAACGGGAGGCGACAT	12	activated.CD4.positive..alpha.beta.T.cell
10X_P4_7_AAACGGGAGGGTATCG	14	naive.thymus.derived.CD8.positive..alpha.beta.T.cell
10X_P4_7_AAACGGGAGTGCCATT	11	marginal.zone.B.cell.of.spleen
10X_P4_7_AAACGGGCACTTGGAT	11	marginal.zone.B.cell.of.spleen
10X_P4_7_AAACGGGTCTGATTCT	11	marginal.zone.B.cell.of.spleen
10X_P4_7_AAAGATGAGCCATCGC	2	macrophage
10X_P4_7_AAAGATGAGGACCACA	11	marginal.zone.B.cell.of.spleen
10X_P4_7_AAAGATGCAATCACAC	11	marginal.zone.B.cell.of.spleen
10X_P4_7_AAAGATGTCTGGAGCC	11	marginal.zone.B.cell.of.spleen
10X_P4_7_AAAGCAAAGAATCTCC	11	marginal.zone.B.cell.of.spleen
10X_P4_7_AAAGCAAAGCTAGCCC	11	marginal.zone.B.cell.of.spleen
10X_P4_7_AAAGCAAAGTCATGCT	5	mesenchymal.stem.cell
10X_P4_7_AAAGCAACACACCGAC	14	naive.thymus.derived.CD8.positive..alpha.beta.T.cell
10X_P4_7_AAAGCAACACCTGGTG	10	mature.NK.T.cell
10X_P4_7_AAAGCAACAGGTGGAT	13	CD8.positive..alpha.beta.memory.T.cell
10X_P4_7_AAAGCAACATTACCTT	11	marginal.zone.B.cell.of.spleen
10X_P4_7_AAAGCAAGTCTTGATG	3	plasmacytoid.dendritic.cell
10X_P4_7_AAAGCAATCACATGCA	11	marginal.zone.B.cell.of.spleen
10X_P4_7_AAAGTAGAGCAGGTCA	11	marginal.zone.B.cell.of.spleen
10X_P4_7_AAAGTAGAGTACACCT	11	marginal.zone.B.cell.of.spleen
10X_P4_7_AAAGTAGCAATCCAAC	11	marginal.zone.B.cell.of.spleen
10X_P4_7_AAAGTAGCAGCCTTGG	11	marginal.zone.B.cell.of.spleen
10X_P4_7_AAAGTAGCATACGCCG	11	marginal.zone.B.cell.of.spleen
10X_P4_7_AAAGTAGGTCGGATCC	11	marginal.zone.B.cell.of.spleen
10X_P4_7_AAAGTAGGTCTCTTAT	11	marginal.zone.B.cell.of.spleen
10X_P4_7_AAAGTAGTCCTCAATT	14	naive.thymus.derived.CD8.positive..alpha.beta.T.cell
10X_P4_7_AAATGCCAGATCCGAG	11	marginal.zone.B.cell.of.spleen
10X_P4_7_AAATGCCCAAGAGTCG	11	marginal.zone.B.cell.of.spleen
10X_P4_7_AAATGCCGTGCACGAA	11	marginal.zone.B.cell.of.spleen
10X_P4_7_AAATGCCGTTACGCGC	11	marginal.zone.B.cell.of.spleen
10X_P4_7_AAATGCCTCAAACGGG	11	marginal.zone.B.cell.of.spleen
10X_P4_7_AACACGTAGACTGGGT	12	activated.CD4.positive..alpha.beta.T.cell
10X_P4_7_AACACGTAGCCGATTT	11	marginal.zone.B.cell.of.spleen
10X_P4_7_AACACGTCAATCCAAC	11	marginal.zone.B.cell.of.spleen
10X_P4_7_AACACGTCAGTACACT	11	marginal.zone.B.cell.of.spleen
10X_P4_7_AACACGTCATGGTAGG	11	marginal.zone.B.cell.of.spleen
10X_P4_7_AACACGTCATTAACCG	11	marginal.zone.B.cell.of.spleen
10X_P4_7_AACACGTGTAACGTTC	13	CD8.positive..alpha.beta.memory.T.cell
10X_P4_7_AACACGTGTACTTGAC	11	marginal.zone.B.cell.of.spleen
10X_P4_7_AACACGTGTCTGATTG	11	marginal.zone.B.cell.of.spleen
10X_P4_7_AACACGTTCCCGACTT	8	natural.killer.cell
10X_P4_7_AACACGTTCTCTGTCG	14	naive.thymus.derived.CD8.positive..alpha.beta.T.cell
10X_P4_7_AACCATGAGAGACTTA	14	naive.thymus.derived.CD8.positive..alpha.beta.T.cell
10X_P4_7_AACCATGAGAGTACAT	11	marginal.zone.B.cell.of.spleen
10X_P4_7_AACCATGAGCCGTCGT	11	marginal.zone.B.cell.of.spleen
10X_P4_7_AACCATGAGGGAAACA	11	marginal.zone.B.cell.of.spleen
10X_P4_7_AACCATGCATCCAACA	11	marginal.zone.B.cell.of.spleen
10X_P4_7_AACCATGGTCCAAGTT	12	activated.CD4.positive..alpha.beta.T.cell
10X_P4_7_AACCATGGTGCTAGCC	11	marginal.zone.B.cell.of.spleen
10X_P4_7_AACCATGGTTCGGCAC	11	marginal.zone.B.cell.of.spleen
10X_P4_7_AACCATGTCACGACTA	11	marginal.zone.B.cell.of.spleen
10X_P4_7_AACCATGTCCAGGGCT	12	activated.CD4.positive..alpha.beta.T.cell
10X_P4_7_AACCATGTCGGAAATA	14	naive.thymus.derived.CD8.positive..alpha.beta.T.cell
10X_P4_7_AACCATGTCTTGCAAG	11	marginal.zone.B.cell.of.spleen
10X_P4_7_AACCGCGCACGAGGTA	11	marginal.zone.B.cell.of.spleen
10X_P4_7_AACCGCGGTCGCATAT	11	marginal.zone.B.cell.of.spleen
10X_P4_7_AACCGCGGTGATGCCC	11	marginal.zone.B.cell.of.spleen
10X_P4_7_AACCGCGTCCAGAGGA	11	marginal.zone.B.cell.of.spleen
10X_P4_7_AACGTTGCAGCCTATA	7	conventional.dendritic.cell
10X_P4_7_AACGTTGCATCAGTCA	11	marginal.zone.B.cell.of.spleen
10X_P4_7_AACGTTGCATCTCGCT	11	marginal.zone.B.cell.of.spleen
10X_P4_7_AACGTTGCATGAACCT	12	activated.CD4.positive..alpha.beta.T.cell
10X_P4_7_AACGTTGGTCGGATCC	11	marginal.zone.B.cell.of.spleen
10X_P4_7_AACGTTGGTTAAAGTG	5	mesenchymal.stem.cell
10X_P4_7_AACGTTGGTTGCGCAC	12	activated.CD4.positive..alpha.beta.T.cell
10X_P4_7_AACGTTGTCGGATGGA	11	marginal.zone.B.cell.of.spleen
10X_P4_7_AACGTTGTCGGTGTTA	11	marginal.zone.B.cell.of.spleen
10X_P4_7_AACTCAGGTCCCGACA	11	marginal.zone.B.cell.of.spleen
10X_P4_7_AACTCAGGTCTTGCGG	11	marginal.zone.B.cell.of.spleen
10X_P4_7_AACTCAGGTGAAAGAG	14	naive.thymus.derived.CD8.positive..alpha.beta.T.cell
10X_P4_7_AACTCAGGTTCGTGAT	11	marginal.zone.B.cell.of.spleen
10X_P4_7_AACTCAGGTTTCCACC	11	marginal.zone.B.cell.of.spleen
10X_P4_7_AACTCAGTCGGATGTT	11	marginal.zone.B.cell.of.spleen
10X_P4_7_AACTCAGTCGGCGGTT	11	marginal.zone.B.cell.of.spleen
10X_P4_7_AACTCCCAGCAAATCA	11	marginal.zone.B.cell.of.spleen
10X_P4_7_AACTCCCAGCCCGAAA	15	naive.thymus.derived.CD4.positive..alpha.beta.T.cell
10X_P4_7_AACTCCCCAATGTAAG	11	marginal.zone.B.cell.of.spleen
10X_P4_7_AACTCCCGTGAGCGAT	11	marginal.zone.B.cell.of.spleen
10X_P4_7_AACTCCCGTTACTGAC	11	marginal.zone.B.cell.of.spleen
10X_P4_7_AACTCCCTCGAATCCA	14	naive.thymus.derived.CD8.positive..alpha.beta.T.cell
10X_P4_7_AACTCCCTCGATCCCT	15	naive.thymus.derived.CD4.positive..alpha.beta.T.cell
10X_P4_7_AACTCTTAGTACGTTC	11	marginal.zone.B.cell.of.spleen
10X_P4_7_AACTCTTCAGACACTT	11	marginal.zone.B.cell.of.spleen
10X_P4_7_AACTCTTCATTCGACA	6	monocyte
10X_P4_7_AACTCTTGTACCGGCT	11	marginal.zone.B.cell.of.spleen
10X_P4_7_AACTCTTGTCTAGTCA	11	marginal.zone.B.cell.of.spleen
10X_P4_7_AACTCTTTCAGAAATG	11	marginal.zone.B.cell.of.spleen
10X_P4_7_AACTCTTTCCGAAGAG	11	marginal.zone.B.cell.of.spleen
10X_P4_7_AACTGGTGTCAGTGGA	11	marginal.zone.B.cell.of.spleen
10X_P4_7_AACTGGTGTCTACCTC	11	marginal.zone.B.cell.of.spleen
10X_P4_7_AACTGGTGTCTCACCT	9	follicular.B.cell
10X_P4_7_AACTGGTGTCTGCGGT	15	naive.thymus.derived.CD4.positive..alpha.beta.T.cell
10X_P4_7_AACTGGTTCCATGAAC	7	conventional.dendritic.cell
10X_P4_7_AACTGGTTCCTAAGTG	11	marginal.zone.B.cell.of.spleen
10X_P4_7_AACTTTCAGTGTTGAA	11	marginal.zone.B.cell.of.spleen
10X_P4_7_AACTTTCCACAAGCCC	15	naive.thymus.derived.CD4.positive..alpha.beta.T.cell
10X_P4_7_AACTTTCCACTAGTAC	11	marginal.zone.B.cell.of.spleen
10X_P4_7_AACTTTCCATCCTTGC	11	marginal.zone.B.cell.of.spleen
10X_P4_7_AACTTTCGTATTACCG	11	marginal.zone.B.cell.of.spleen
10X_P4_7_AACTTTCGTGTTTGTG	11	marginal.zone.B.cell.of.spleen
10X_P4_7_AACTTTCGTTCCACAA	14	naive.thymus.derived.CD8.positive..alpha.beta.T.cell
10X_P4_7_AACTTTCTCATCGATG	15	naive.thymus.derived.CD4.positive..alpha.beta.T.cell
10X_P4_7_AACTTTCTCTGCCCTA	11	marginal.zone.B.cell.of.spleen
10X_P4_7_AAGACCTAGTCTCAAC	11	marginal.zone.B.cell.of.spleen
10X_P4_7_AAGACCTAGTTCGATC	11	marginal.zone.B.cell.of.spleen
10X_P4_7_AAGACCTCATGACGGA	11	marginal.zone.B.cell.of.spleen
10X_P4_7_AAGACCTGTGTGGCTC	11	marginal.zone.B.cell.of.spleen
10X_P4_7_AAGACCTTCAAAGTAG	13	CD8.positive..alpha.beta.memory.T.cell
10X_P4_7_AAGACCTTCAAGAAGT	11	marginal.zone.B.cell.of.spleen
10X_P4_7_AAGACCTTCGTGGACC	11	marginal.zone.B.cell.of.spleen
10X_P4_7_AAGCCGCCATCGTCGG	14	naive.thymus.derived.CD8.positive..alpha.beta.T.cell
10X_P4_7_AAGCCGCGTACACCGC	11	marginal.zone.B.cell.of.spleen
10X_P4_7_AAGCCGCGTACTTCTT	11	marginal.zone.B.cell.of.spleen
10X_P4_7_AAGCCGCGTCCTCTTG	11	marginal.zone.B.cell.of.spleen
10X_P4_7_AAGCCGCTCACTGGGC	11	marginal.zone.B.cell.of.spleen
10X_P4_7_AAGCCGCTCACTTATC	11	marginal.zone.B.cell.of.spleen
10X_P4_7_AAGCCGCTCAGTTGAC	11	marginal.zone.B.cell.of.spleen
10X_P4_7_AAGCCGCTCCGCAAGC	11	marginal.zone.B.cell.of.spleen
10X_P4_7_AAGGAGCCATCTATGG	11	marginal.zone.B.cell.of.spleen
10X_P4_7_AAGGAGCGTACGCTGC	11	marginal.zone.B.cell.of.spleen
10X_P4_7_AAGGAGCGTAGCGCTC	11	marginal.zone.B.cell.of.spleen
10X_P4_7_AAGGAGCTCTCGAGTA	11	marginal.zone.B.cell.of.spleen
10X_P4_7_AAGGAGCTCTTGTCAT	11	marginal.zone.B.cell.of.spleen
10X_P4_7_AAGGCAGAGAAACCAT	12	activated.CD4.positive..alpha.beta.T.cell
10X_P4_7_AAGGCAGAGGCGACAT	11	marginal.zone.B.cell.of.spleen
10X_P4_7_AAGGCAGAGTACGTAA	11	marginal.zone.B.cell.of.spleen
10X_P4_7_AAGGCAGCACAAGTAA	15	naive.thymus.derived.CD4.positive..alpha.beta.T.cell
10X_P4_7_AAGGCAGGTACCCAAT	11	marginal.zone.B.cell.of.spleen
10X_P4_7_AAGGTTCCAAACCCAT	11	marginal.zone.B.cell.of.spleen
10X_P4_7_AAGGTTCCAAAGCAAT	12	activated.CD4.positive..alpha.beta.T.cell
10X_P4_7_AAGGTTCCAGTAACGG	11	marginal.zone.B.cell.of.spleen
10X_P4_7_AAGGTTCGTCACAAGG	11	marginal.zone.B.cell.of.spleen
10X_P4_7_AAGGTTCGTTCACGGC	11	marginal.zone.B.cell.of.spleen
10X_P4_7_AAGGTTCTCAGTCAGT	11	marginal.zone.B.cell.of.spleen
10X_P4_7_AAGGTTCTCATAACCG	11	marginal.zone.B.cell.of.spleen
10X_P4_7_AAGGTTCTCGTATCAG	6	monocyte
10X_P4_7_AAGTCTGAGACAAAGG	11	marginal.zone.B.cell.of.spleen
10X_P4_7_AAGTCTGAGCGAAGGG	15	naive.thymus.derived.CD4.positive..alpha.beta.T.cell
10X_P4_7_AAGTCTGGTAGCGTGA	11	marginal.zone.B.cell.of.spleen
10X_P4_7_AAGTCTGGTGTGACCC	11	marginal.zone.B.cell.of.spleen
10X_P4_7_AAGTCTGTCAGAGGTG	11	marginal.zone.B.cell.of.spleen
10X_P4_7_AAGTCTGTCTTACCTA	11	marginal.zone.B.cell.of.spleen
10X_P4_7_AATCCAGAGACATAAC	11	marginal.zone.B.cell.of.spleen
10X_P4_7_AATCCAGAGGCAGGTT	11	marginal.zone.B.cell.of.spleen
10X_P4_7_AATCCAGCAGACAAGC	11	marginal.zone.B.cell.of.spleen
10X_P4_7_AATCCAGGTCGCGGTT	11	marginal.zone.B.cell.of.spleen
10X_P4_7_AATCCAGGTCTCGTTC	11	marginal.zone.B.cell.of.spleen
10X_P4_7_AATCCAGTCCAAATGC	11	marginal.zone.B.cell.of.spleen
10X_P4_7_AATCCAGTCGTTGCCT	11	marginal.zone.B.cell.of.spleen
10X_P4_7_AATCGGTAGGATTCGG	11	marginal.zone.B.cell.of.spleen
10X_P4_7_AATCGGTCACAAGTAA	11	marginal.zone.B.cell.of.spleen
10X_P4_7_AATCGGTCATTACCTT	11	marginal.zone.B.cell.of.spleen
10X_P4_7_ACACCAACAATCCAAC	14	naive.thymus.derived.CD8.positive..alpha.beta.T.cell
10X_P4_7_ACACCAACACATAACC	15	naive.thymus.derived.CD4.positive..alpha.beta.T.cell
10X_P4_7_ACACCAACACGTTGGC	11	marginal.zone.B.cell.of.spleen
10X_P4_7_ACACCAATCACCACCT	11	marginal.zone.B.cell.of.spleen
10X_P4_7_ACACCAATCCCGACTT	11	marginal.zone.B.cell.of.spleen
10X_P4_7_ACACCAATCCCTGACT	11	marginal.zone.B.cell.of.spleen
10X_P4_7_ACACCAATCGAGAACG	11	marginal.zone.B.cell.of.spleen
10X_P4_7_ACACCAATCGTTACGA	11	marginal.zone.B.cell.of.spleen
10X_P4_7_ACACCAATCTCAACTT	9	follicular.B.cell
10X_P4_7_ACACCCTAGCAGGTCA	11	marginal.zone.B.cell.of.spleen
10X_P4_7_ACACCCTAGTGGTAAT	11	marginal.zone.B.cell.of.spleen
10X_P4_7_ACACCCTCACATCCGG	6	monocyte
10X_P4_7_ACACCCTCAGGGTATG	2	macrophage
10X_P4_7_ACACCCTCATGGTCAT	11	marginal.zone.B.cell.of.spleen
10X_P4_7_ACACCCTCATGTCTCC	6	monocyte
10X_P4_7_ACACCCTGTTCCATGA	13	CD8.positive..alpha.beta.memory.T.cell
10X_P4_7_ACACCCTGTTCTGGTA	5	mesenchymal.stem.cell
10X_P4_7_ACACCCTTCAGTTTGG	11	marginal.zone.B.cell.of.spleen
10X_P4_7_ACACCCTTCGGATGTT	11	marginal.zone.B.cell.of.spleen
10X_P4_7_ACACCGGAGAGTTGGC	11	marginal.zone.B.cell.of.spleen
10X_P4_7_ACACCGGAGTTATCGC	15	naive.thymus.derived.CD4.positive..alpha.beta.T.cell
10X_P4_7_ACACCGGGTAAGTAGT	6	monocyte
10X_P4_7_ACACCGGGTACCATCA	11	marginal.zone.B.cell.of.spleen
10X_P4_7_ACACCGGGTCTGCCAG	11	marginal.zone.B.cell.of.spleen
10X_P4_7_ACACCGGGTGTGGCTC	11	marginal.zone.B.cell.of.spleen
10X_P4_7_ACACCGGGTTCGGGCT	12	activated.CD4.positive..alpha.beta.T.cell
10X_P4_7_ACACTGAAGCTGATAA	15	naive.thymus.derived.CD4.positive..alpha.beta.T.cell
10X_P4_7_ACACTGACACAGTCGC	11	marginal.zone.B.cell.of.spleen
10X_P4_7_ACACTGACATAACCTG	11	marginal.zone.B.cell.of.spleen
10X_P4_7_ACACTGAGTAAGTAGT	15	naive.thymus.derived.CD4.positive..alpha.beta.T.cell
10X_P4_7_ACACTGATCCAAACAC	11	marginal.zone.B.cell.of.spleen
10X_P4_7_ACACTGATCCGCGTTT	9	follicular.B.cell
10X_P4_7_ACACTGATCGACGGAA	3	plasmacytoid.dendritic.cell
10X_P4_7_ACAGCCGAGATATGGT	13	CD8.positive..alpha.beta.memory.T.cell
10X_P4_7_ACAGCCGCACATTTCT	11	marginal.zone.B.cell.of.spleen
10X_P4_7_ACAGCCGGTAAATGAC	11	marginal.zone.B.cell.of.spleen
10X_P4_7_ACAGCCGGTTGTGGCC	11	marginal.zone.B.cell.of.spleen
10X_P4_7_ACAGCCGTCAGTTTGG	11	marginal.zone.B.cell.of.spleen
10X_P4_7_ACAGCCGTCCCGGATG	5	mesenchymal.stem.cell
10X_P4_7_ACAGCCGTCCCTCTTT	11	marginal.zone.B.cell.of.spleen
10X_P4_7_ACAGCTAAGTACACCT	11	marginal.zone.B.cell.of.spleen
10X_P4_7_ACAGCTACAGATCTGT	8	natural.killer.cell
10X_P4_7_ACAGCTACATCCAACA	14	naive.thymus.derived.CD8.positive..alpha.beta.T.cell
10X_P4_7_ACAGCTACATTCCTCG	11	marginal.zone.B.cell.of.spleen
10X_P4_7_ACAGCTAGTAGGCTGA	15	naive.thymus.derived.CD4.positive..alpha.beta.T.cell
10X_P4_7_ACAGCTAGTCCGAACC	11	marginal.zone.B.cell.of.spleen
10X_P4_7_ACAGCTAGTTAAGTAG	8	natural.killer.cell
10X_P4_7_ACAGCTAGTTCCGTCT	11	marginal.zone.B.cell.of.spleen
10X_P4_7_ACAGCTATCGGTGTTA	11	marginal.zone.B.cell.of.spleen
10X_P4_7_ACATACGAGGCAGTCA	11	marginal.zone.B.cell.of.spleen
10X_P4_7_ACATACGAGTGTACTC	4	T1.B.cell
10X_P4_7_ACATACGCAAGGACTG	8	natural.killer.cell
10X_P4_7_ACATACGCAGCATGAG	8	natural.killer.cell
10X_P4_7_ACATACGCATCGATTG	11	marginal.zone.B.cell.of.spleen
10X_P4_7_ACATACGGTAATTGGA	2	macrophage
10X_P4_7_ACATACGTCACTGGGC	11	marginal.zone.B.cell.of.spleen
10X_P4_7_ACATACGTCGCAGGCT	11	marginal.zone.B.cell.of.spleen
10X_P4_7_ACATACGTCTGCGTAA	15	naive.thymus.derived.CD4.positive..alpha.beta.T.cell
10X_P4_7_ACATCAGAGAGAACAG	3	plasmacytoid.dendritic.cell
10X_P4_7_ACATCAGAGCATGGCA	11	marginal.zone.B.cell.of.spleen
10X_P4_7_ACATCAGAGCTAGGCA	11	marginal.zone.B.cell.of.spleen
10X_P4_7_ACATCAGCACGTAAGG	11	marginal.zone.B.cell.of.spleen
10X_P4_7_ACATCAGCAGTATGCT	7	conventional.dendritic.cell
10X_P4_7_ACATCAGCATCCTAGA	11	marginal.zone.B.cell.of.spleen
10X_P4_7_ACATCAGGTCCAGTGC	9	follicular.B.cell
10X_P4_7_ACATCAGGTCCGTGAC	13	CD8.positive..alpha.beta.memory.T.cell
10X_P4_7_ACATCAGGTGTATGGG	11	marginal.zone.B.cell.of.spleen
10X_P4_7_ACATCAGGTTAGGGTG	11	marginal.zone.B.cell.of.spleen
10X_P4_7_ACATCAGTCCTTGACC	15	naive.thymus.derived.CD4.positive..alpha.beta.T.cell
10X_P4_7_ACATGGTGTCTGATCA	4	T1.B.cell
10X_P4_7_ACATGGTGTTCACGGC	11	marginal.zone.B.cell.of.spleen
10X_P4_7_ACATGGTTCTGAGGGA	11	marginal.zone.B.cell.of.spleen
10X_P4_7_ACATGGTTCTTTACGT	13	CD8.positive..alpha.beta.memory.T.cell
10X_P4_7_ACCAGTAAGCTAGTCT	15	naive.thymus.derived.CD4.positive..alpha.beta.T.cell
10X_P4_7_ACCAGTACAAATACAG	11	marginal.zone.B.cell.of.spleen
10X_P4_7_ACCAGTACACGTCTCT	11	marginal.zone.B.cell.of.spleen
10X_P4_7_ACCAGTACATGCCCGA	11	marginal.zone.B.cell.of.spleen
10X_P4_7_ACCAGTAGTATTACCG	12	activated.CD4.positive..alpha.beta.T.cell
10X_P4_7_ACCAGTAGTCTGATTG	11	marginal.zone.B.cell.of.spleen
10X_P4_7_ACCAGTAGTTGAGTTC	11	marginal.zone.B.cell.of.spleen
10X_P4_7_ACCAGTATCCTGCCAT	14	naive.thymus.derived.CD8.positive..alpha.beta.T.cell
10X_P4_7_ACCAGTATCTTAACCT	11	marginal.zone.B.cell.of.spleen
10X_P4_7_ACCCACTAGTACGCGA	11	marginal.zone.B.cell.of.spleen
10X_P4_7_ACCCACTAGTGATCGG	11	marginal.zone.B.cell.of.spleen
10X_P4_7_ACCCACTCAATCGAAA	11	marginal.zone.B.cell.of.spleen
10X_P4_7_ACCCACTCATAAAGGT	11	marginal.zone.B.cell.of.spleen
10X_P4_7_ACCCACTCATGATCCA	11	marginal.zone.B.cell.of.spleen
10X_P4_7_ACCCACTGTGCAACTT	14	naive.thymus.derived.CD8.positive..alpha.beta.T.cell
10X_P4_7_ACCCACTTCAAGGCTT	11	marginal.zone.B.cell.of.spleen
10X_P4_7_ACCCACTTCGTATCAG	14	naive.thymus.derived.CD8.positive..alpha.beta.T.cell
10X_P4_7_ACCCACTTCGTCGTTC	11	marginal.zone.B.cell.of.spleen
10X_P4_7_ACCGTAACACGCGAAA	11	marginal.zone.B.cell.of.spleen
10X_P4_7_ACCGTAACATGCCACG	11	marginal.zone.B.cell.of.spleen
10X_P4_7_ACCGTAAGTAGCTAAA	11	marginal.zone.B.cell.of.spleen
10X_P4_7_ACCGTAAGTGTCCTCT	13	CD8.positive..alpha.beta.memory.T.cell
10X_P4_7_ACCTTTACAAGTAATG	11	marginal.zone.B.cell.of.spleen
10X_P4_7_ACCTTTACAGGCAGTA	9	follicular.B.cell
10X_P4_7_ACCTTTACATCTACGA	11	marginal.zone.B.cell.of.spleen
10X_P4_7_ACCTTTACATGCCCGA	11	marginal.zone.B.cell.of.spleen
10X_P4_7_ACCTTTAGTAGGCATG	11	marginal.zone.B.cell.of.spleen
10X_P4_7_ACCTTTATCATCGCTC	11	marginal.zone.B.cell.of.spleen
10X_P4_7_ACCTTTATCCGCGCAA	11	marginal.zone.B.cell.of.spleen
10X_P4_7_ACGAGCCAGCCGCCTA	11	marginal.zone.B.cell.of.spleen
10X_P4_7_ACGAGCCAGCTAAGAT	13	CD8.positive..alpha.beta.memory.T.cell
10X_P4_7_ACGAGCCAGTGGGCTA	11	marginal.zone.B.cell.of.spleen
10X_P4_7_ACGAGCCGTAAGAGGA	8	natural.killer.cell
10X_P4_7_ACGAGCCGTGAGTGAC	11	marginal.zone.B.cell.of.spleen
10X_P4_7_ACGAGCCGTTAAGATG	11	marginal.zone.B.cell.of.spleen
10X_P4_7_ACGAGCCGTTAAGGGC	11	marginal.zone.B.cell.of.spleen
10X_P4_7_ACGAGCCGTTATTCTC	11	marginal.zone.B.cell.of.spleen
10X_P4_7_ACGAGGAAGAAACCGC	11	marginal.zone.B.cell.of.spleen
10X_P4_7_ACGAGGAAGCGATGAC	14	naive.thymus.derived.CD8.positive..alpha.beta.T.cell
10X_P4_7_ACGAGGAAGTCCTCCT	11	marginal.zone.B.cell.of.spleen
10X_P4_7_ACGAGGAGTAAACCTC	14	naive.thymus.derived.CD8.positive..alpha.beta.T.cell
10X_P4_7_ACGAGGAGTCTAGTCA	11	marginal.zone.B.cell.of.spleen
10X_P4_7_ACGAGGATCCAAGTAC	15	naive.thymus.derived.CD4.positive..alpha.beta.T.cell
10X_P4_7_ACGATACAGAACAATC	5	mesenchymal.stem.cell
10X_P4_7_ACGATACAGATCGATA	11	marginal.zone.B.cell.of.spleen
10X_P4_7_ACGATACAGCTGCGAA	4	T1.B.cell
10X_P4_7_ACGATACCACACATGT	11	marginal.zone.B.cell.of.spleen
10X_P4_7_ACGATACGTGCCTTGG	11	marginal.zone.B.cell.of.spleen
10X_P4_7_ACGATACTCAAGAAGT	14	naive.thymus.derived.CD8.positive..alpha.beta.T.cell
10X_P4_7_ACGATACTCAATCTCT	11	marginal.zone.B.cell.of.spleen
10X_P4_7_ACGATACTCATCATTC	11	marginal.zone.B.cell.of.spleen
10X_P4_7_ACGATACTCTACTATC	15	naive.thymus.derived.CD4.positive..alpha.beta.T.cell
10X_P4_7_ACGATGTAGCAACGGT	11	marginal.zone.B.cell.of.spleen
10X_P4_7_ACGATGTAGTGGAGAA	11	marginal.zone.B.cell.of.spleen
10X_P4_7_ACGATGTGTAGCGTGA	14	naive.thymus.derived.CD8.positive..alpha.beta.T.cell
10X_P4_7_ACGATGTGTTGTTTGG	11	marginal.zone.B.cell.of.spleen
10X_P4_7_ACGATGTTCAGCTGGC	13	CD8.positive..alpha.beta.memory.T.cell
10X_P4_7_ACGATGTTCTCAAGTG	9	follicular.B.cell
10X_P4_7_ACGATGTTCTGAAAGA	11	marginal.zone.B.cell.of.spleen
10X_P4_7_ACGCAGCAGGGATCTG	11	marginal.zone.B.cell.of.spleen
10X_P4_7_ACGCAGCCAGCGATCC	3	plasmacytoid.dendritic.cell
10X_P4_7_ACGCAGCGTACCGTAT	11	marginal.zone.B.cell.of.spleen
10X_P4_7_ACGCAGCGTACGCACC	11	marginal.zone.B.cell.of.spleen
10X_P4_7_ACGCAGCTCGTAGGTT	11	marginal.zone.B.cell.of.spleen
10X_P4_7_ACGCCAGAGTGGTAGC	11	marginal.zone.B.cell.of.spleen
10X_P4_7_ACGCCAGCAAACCCAT	11	marginal.zone.B.cell.of.spleen
10X_P4_7_ACGCCAGCAAACCTAC	11	marginal.zone.B.cell.of.spleen
10X_P4_7_ACGCCAGCACCAGATT	11	marginal.zone.B.cell.of.spleen
10X_P4_7_ACGCCAGCAGGGTATG	11	marginal.zone.B.cell.of.spleen
10X_P4_7_ACGCCAGGTAAAGTCA	11	marginal.zone.B.cell.of.spleen
10X_P4_7_ACGCCAGGTATCTGCA	11	marginal.zone.B.cell.of.spleen
10X_P4_7_ACGCCAGGTCCGTTAA	11	marginal.zone.B.cell.of.spleen
10X_P4_7_ACGCCAGGTTGTCTTT	11	marginal.zone.B.cell.of.spleen
10X_P4_7_ACGCCAGGTTTCGCTC	11	marginal.zone.B.cell.of.spleen
10X_P4_7_ACGCCAGTCAACACGT	11	marginal.zone.B.cell.of.spleen
10X_P4_7_ACGCCAGTCCTCAACC	11	marginal.zone.B.cell.of.spleen
10X_P4_7_ACGCCAGTCTCCAGGG	11	marginal.zone.B.cell.of.spleen
10X_P4_7_ACGCCAGTCTCTGCTG	11	marginal.zone.B.cell.of.spleen
10X_P4_7_ACGCCGAAGCATCATC	11	marginal.zone.B.cell.of.spleen
10X_P4_7_ACGCCGAAGGAGTTTA	11	marginal.zone.B.cell.of.spleen
10X_P4_7_ACGCCGACACTTCGAA	11	marginal.zone.B.cell.of.spleen
10X_P4_7_ACGCCGAGTACTCGCG	11	marginal.zone.B.cell.of.spleen
10X_P4_7_ACGCCGATCCGTTGCT	11	marginal.zone.B.cell.of.spleen
10X_P4_7_ACGCCGATCGCAAACT	11	marginal.zone.B.cell.of.spleen
10X_P4_7_ACGCCGATCGGGAGTA	11	marginal.zone.B.cell.of.spleen
10X_P4_7_ACGGAGAAGTGACTCT	13	CD8.positive..alpha.beta.memory.T.cell
10X_P4_7_ACGGAGAAGTGGAGTC	11	marginal.zone.B.cell.of.spleen
10X_P4_7_ACGGAGACAATGGAGC	11	marginal.zone.B.cell.of.spleen
10X_P4_7_ACGGAGACAGGGCATA	11	marginal.zone.B.cell.of.spleen
10X_P4_7_ACGGAGACATCGGACC	14	naive.thymus.derived.CD8.positive..alpha.beta.T.cell
10X_P4_7_ACGGAGACATGGAATA	11	marginal.zone.B.cell.of.spleen
10X_P4_7_ACGGAGATCGCACTCT	11	marginal.zone.B.cell.of.spleen
10X_P4_7_ACGGAGATCTTGTTTG	11	marginal.zone.B.cell.of.spleen
10X_P4_7_ACGGCCACAATGCCAT	8	natural.killer.cell
10X_P4_7_ACGGCCACACAAGTAA	11	marginal.zone.B.cell.of.spleen
10X_P4_7_ACGGCCAGTGCTCTTC	11	marginal.zone.B.cell.of.spleen
10X_P4_7_ACGGCCATCGAGGTAG	11	marginal.zone.B.cell.of.spleen
10X_P4_7_ACGGGCTAGCAATATG	12	activated.CD4.positive..alpha.beta.T.cell
10X_P4_7_ACGGGCTAGCAATCTC	11	marginal.zone.B.cell.of.spleen
10X_P4_7_ACGGGCTAGCGTGTCC	11	marginal.zone.B.cell.of.spleen
10X_P4_7_ACGGGCTCAGTCACTA	11	marginal.zone.B.cell.of.spleen
10X_P4_7_ACGGGCTGTTCTCATT	11	marginal.zone.B.cell.of.spleen
10X_P4_7_ACGGGCTTCTACCAGA	11	marginal.zone.B.cell.of.spleen
10X_P4_7_ACGGGTCCAGCCAATT	11	marginal.zone.B.cell.of.spleen
10X_P4_7_ACGGGTCGTGGTTTCA	11	marginal.zone.B.cell.of.spleen
10X_P4_7_ACGGGTCGTTCCGGCA	11	marginal.zone.B.cell.of.spleen
10X_P4_7_ACGGGTCTCTCGCTTG	11	marginal.zone.B.cell.of.spleen
10X_P4_7_ACGTCAACACGGTGTC	11	marginal.zone.B.cell.of.spleen
10X_P4_7_ACGTCAAGTCATCGGC	11	marginal.zone.B.cell.of.spleen
10X_P4_7_ACGTCAAGTTGATTCG	2	macrophage
10X_P4_7_ACGTCAATCGAACGGA	6	monocyte
10X_P4_7_ACGTCAATCGGTCTAA	2	macrophage
10X_P4_7_ACTATCTAGAGTGAGA	11	marginal.zone.B.cell.of.spleen
10X_P4_7_ACTATCTAGTGGCACA	11	marginal.zone.B.cell.of.spleen
10X_P4_7_ACTATCTGTACAGTTC	11	marginal.zone.B.cell.of.spleen
10X_P4_7_ACTATCTGTACCGAGA	11	marginal.zone.B.cell.of.spleen
10X_P4_7_ACTATCTGTACGAAAT	13	CD8.positive..alpha.beta.memory.T.cell
10X_P4_7_ACTATCTGTCCTCTTG	10	mature.NK.T.cell
10X_P4_7_ACTATCTGTGACGCCT	15	naive.thymus.derived.CD4.positive..alpha.beta.T.cell
10X_P4_7_ACTATCTGTTATCACG	11	marginal.zone.B.cell.of.spleen
10X_P4_7_ACTATCTTCCTAGTGA	11	marginal.zone.B.cell.of.spleen
10X_P4_7_ACTATCTTCTCATTCA	11	marginal.zone.B.cell.of.spleen
10X_P4_7_ACTGAACAGAAGCCCA	11	marginal.zone.B.cell.of.spleen
10X_P4_7_ACTGAACAGTCCGGTC	11	marginal.zone.B.cell.of.spleen
10X_P4_7_ACTGAACCATTGAGCT	11	marginal.zone.B.cell.of.spleen
10X_P4_7_ACTGAACGTTCGCGAC	15	naive.thymus.derived.CD4.positive..alpha.beta.T.cell
10X_P4_7_ACTGAACTCCCAAGTA	11	marginal.zone.B.cell.of.spleen
10X_P4_7_ACTGAGTAGCGTTTAC	11	marginal.zone.B.cell.of.spleen
10X_P4_7_ACTGAGTCAAAGAATC	11	marginal.zone.B.cell.of.spleen
10X_P4_7_ACTGAGTGTATAGTAG	11	marginal.zone.B.cell.of.spleen
10X_P4_7_ACTGAGTGTGTGGTTT	11	marginal.zone.B.cell.of.spleen
10X_P4_7_ACTGAGTTCAGTTAGC	11	marginal.zone.B.cell.of.spleen
10X_P4_7_ACTGATGAGAAACGAG	14	naive.thymus.derived.CD8.positive..alpha.beta.T.cell
10X_P4_7_ACTGATGAGAAGGACA	11	marginal.zone.B.cell.of.spleen
10X_P4_7_ACTGATGAGCTATGCT	11	marginal.zone.B.cell.of.spleen
10X_P4_7_ACTGATGGTCGGCATC	11	marginal.zone.B.cell.of.spleen
10X_P4_7_ACTGATGGTGCCTGTG	11	marginal.zone.B.cell.of.spleen
10X_P4_7_ACTGATGGTGCGAAAC	15	naive.thymus.derived.CD4.positive..alpha.beta.T.cell
10X_P4_7_ACTGATGGTTGCCTCT	11	marginal.zone.B.cell.of.spleen
10X_P4_7_ACTGATGTCCACGTGG	11	marginal.zone.B.cell.of.spleen
10X_P4_7_ACTGATGTCGGGAGTA	11	marginal.zone.B.cell.of.spleen
10X_P4_7_ACTGATGTCGTACCGG	11	marginal.zone.B.cell.of.spleen
10X_P4_7_ACTGATGTCGTTACGA	11	marginal.zone.B.cell.of.spleen
10X_P4_7_ACTGCTCAGCTAGTGG	11	marginal.zone.B.cell.of.spleen
10X_P4_7_ACTGCTCAGGGCATGT	11	marginal.zone.B.cell.of.spleen
10X_P4_7_ACTGCTCAGTAGGCCA	11	marginal.zone.B.cell.of.spleen
10X_P4_7_ACTGCTCTCGTACGGC	15	naive.thymus.derived.CD4.positive..alpha.beta.T.cell
10X_P4_7_ACTGTCCAGACATAAC	11	marginal.zone.B.cell.of.spleen
10X_P4_7_ACTGTCCCACGACGAA	11	marginal.zone.B.cell.of.spleen
10X_P4_7_ACTGTCCCATGCCTAA	11	marginal.zone.B.cell.of.spleen
10X_P4_7_ACTTACTAGTACGCCC	11	marginal.zone.B.cell.of.spleen
10X_P4_7_ACTTACTCAATTGCTG	11	marginal.zone.B.cell.of.spleen
10X_P4_7_ACTTACTCAGATAATG	14	naive.thymus.derived.CD8.positive..alpha.beta.T.cell
10X_P4_7_ACTTACTCATTAGCCA	2	macrophage
10X_P4_7_ACTTACTGTTTGGCGC	11	marginal.zone.B.cell.of.spleen
10X_P4_7_ACTTACTTCACTTCAT	2	macrophage
10X_P4_7_ACTTGTTCAAGTACCT	11	marginal.zone.B.cell.of.spleen
10X_P4_7_ACTTGTTCAGCTGCAC	11	marginal.zone.B.cell.of.spleen
10X_P4_7_ACTTGTTGTAGGCTGA	11	marginal.zone.B.cell.of.spleen
10X_P4_7_ACTTGTTTCACGGTTA	11	marginal.zone.B.cell.of.spleen
10X_P4_7_ACTTGTTTCGATAGAA	11	marginal.zone.B.cell.of.spleen
10X_P4_7_ACTTTCAAGCTGATAA	11	marginal.zone.B.cell.of.spleen
10X_P4_7_ACTTTCAAGTGCCAGA	11	marginal.zone.B.cell.of.spleen
10X_P4_7_ACTTTCACACCAGGTC	11	marginal.zone.B.cell.of.spleen
10X_P4_7_ACTTTCACATACAGCT	15	naive.thymus.derived.CD4.positive..alpha.beta.T.cell
10X_P4_7_ACTTTCAGTAAATGAC	11	marginal.zone.B.cell.of.spleen
10X_P4_7_ACTTTCAGTACAAGTA	11	marginal.zone.B.cell.of.spleen
10X_P4_7_ACTTTCAGTCAAAGAT	11	marginal.zone.B.cell.of.spleen
10X_P4_7_ACTTTCAGTTCGCGAC	11	marginal.zone.B.cell.of.spleen
10X_P4_7_ACTTTCAGTTTGCATG	11	marginal.zone.B.cell.of.spleen
10X_P4_7_ACTTTCATCGCCTGTT	11	marginal.zone.B.cell.of.spleen
10X_P4_7_ACTTTCATCTCGGACG	11	marginal.zone.B.cell.of.spleen
10X_P4_7_ACTTTCATCTTTACGT	11	marginal.zone.B.cell.of.spleen
10X_P4_7_AGAATAGAGGGTCTCC	12	activated.CD4.positive..alpha.beta.T.cell
10X_P4_7_AGAATAGCAGATGGCA	11	marginal.zone.B.cell.of.spleen
10X_P4_7_AGAATAGGTCAAGCGA	13	CD8.positive..alpha.beta.memory.T.cell
10X_P4_7_AGAATAGGTCATTAGC	11	marginal.zone.B.cell.of.spleen
10X_P4_7_AGAATAGGTGACTCAT	11	marginal.zone.B.cell.of.spleen
10X_P4_7_AGAATAGGTTCCACAA	11	marginal.zone.B.cell.of.spleen
10X_P4_7_AGAATAGTCGGTGTTA	11	marginal.zone.B.cell.of.spleen
10X_P4_7_AGACGTTAGGTAGCTG	14	naive.thymus.derived.CD8.positive..alpha.beta.T.cell
10X_P4_7_AGACGTTTCACTTATC	11	marginal.zone.B.cell.of.spleen
10X_P4_7_AGACGTTTCCACGCAG	11	marginal.zone.B.cell.of.spleen
10X_P4_7_AGAGCGAAGCGTTCCG	11	marginal.zone.B.cell.of.spleen
10X_P4_7_AGAGCGAAGGCCCTCA	11	marginal.zone.B.cell.of.spleen
10X_P4_7_AGAGCGAAGTGGCACA	11	marginal.zone.B.cell.of.spleen
10X_P4_7_AGAGCGAAGTTGAGAT	11	marginal.zone.B.cell.of.spleen
10X_P4_7_AGAGCGACAGGGAGAG	11	marginal.zone.B.cell.of.spleen
10X_P4_7_AGAGCGACAGTATCTG	14	naive.thymus.derived.CD8.positive..alpha.beta.T.cell
10X_P4_7_AGAGCGAGTAAGTTCC	13	CD8.positive..alpha.beta.memory.T.cell
10X_P4_7_AGAGCGAGTCGCCATG	11	marginal.zone.B.cell.of.spleen
10X_P4_7_AGAGCGAGTCTAAACC	11	marginal.zone.B.cell.of.spleen
10X_P4_7_AGAGCGAGTGTGTGCC	11	marginal.zone.B.cell.of.spleen
10X_P4_7_AGAGCGAGTTCCTCCA	11	marginal.zone.B.cell.of.spleen
10X_P4_7_AGAGCGATCCGAATGT	11	marginal.zone.B.cell.of.spleen
10X_P4_7_AGAGCTTAGAATTGTG	11	marginal.zone.B.cell.of.spleen
10X_P4_7_AGAGCTTCACCGTTGG	11	marginal.zone.B.cell.of.spleen
10X_P4_7_AGAGCTTCACGAGGTA	11	marginal.zone.B.cell.of.spleen
10X_P4_7_AGAGCTTCACGGATAG	6	monocyte
10X_P4_7_AGAGCTTGTTACGCGC	11	marginal.zone.B.cell.of.spleen
10X_P4_7_AGAGCTTTCAACGAAA	8	natural.killer.cell
10X_P4_7_AGAGCTTTCACTGGGC	11	marginal.zone.B.cell.of.spleen
10X_P4_7_AGAGCTTTCATCTGCC	11	marginal.zone.B.cell.of.spleen
10X_P4_7_AGAGTGGAGTTATCGC	11	marginal.zone.B.cell.of.spleen
10X_P4_7_AGAGTGGCATATGCTG	2	macrophage
10X_P4_7_AGAGTGGGTCTCCATC	6	monocyte
10X_P4_7_AGAGTGGGTTCCCGAG	6	monocyte
10X_P4_7_AGAGTGGGTTTGGCGC	15	naive.thymus.derived.CD4.positive..alpha.beta.T.cell
10X_P4_7_AGATCTGAGAAACCGC	11	marginal.zone.B.cell.of.spleen
10X_P4_7_AGATCTGAGCCAGTTT	11	marginal.zone.B.cell.of.spleen
10X_P4_7_AGATCTGAGTCATGCT	13	CD8.positive..alpha.beta.memory.T.cell
10X_P4_7_AGATCTGCACTCGACG	11	marginal.zone.B.cell.of.spleen
10X_P4_7_AGATCTGCATAAGACA	11	marginal.zone.B.cell.of.spleen
10X_P4_7_AGATCTGGTCGCGAAA	14	naive.thymus.derived.CD8.positive..alpha.beta.T.cell
10X_P4_7_AGATCTGTCCCGACTT	15	naive.thymus.derived.CD4.positive..alpha.beta.T.cell
10X_P4_7_AGATCTGTCGGAGCAA	5	mesenchymal.stem.cell
10X_P4_7_AGATCTGTCTTTACGT	11	marginal.zone.B.cell.of.spleen
10X_P4_7_AGATTGCAGCAATATG	9	follicular.B.cell
10X_P4_7_AGATTGCCACCATCCT	11	marginal.zone.B.cell.of.spleen
10X_P4_7_AGATTGCTCATCTGTT	8	natural.killer.cell
10X_P4_7_AGATTGCTCCCTCAGT	11	marginal.zone.B.cell.of.spleen
10X_P4_7_AGATTGCTCGCACTCT	11	marginal.zone.B.cell.of.spleen
10X_P4_7_AGATTGCTCGCCAGCA	3	plasmacytoid.dendritic.cell
10X_P4_7_AGATTGCTCTGTCTCG	11	marginal.zone.B.cell.of.spleen
10X_P4_7_AGCAGCCAGCCCGAAA	11	marginal.zone.B.cell.of.spleen
10X_P4_7_AGCAGCCAGTTAAGTG	11	marginal.zone.B.cell.of.spleen
10X_P4_7_AGCAGCCCAAGCGATG	15	naive.thymus.derived.CD4.positive..alpha.beta.T.cell
10X_P4_7_AGCAGCCGTCAGAGGT	11	marginal.zone.B.cell.of.spleen
10X_P4_7_AGCAGCCTCCACGAAT	11	marginal.zone.B.cell.of.spleen
10X_P4_7_AGCAGCCTCGTTTAGG	6	monocyte
10X_P4_7_AGCATACCAATGTAAG	11	marginal.zone.B.cell.of.spleen
10X_P4_7_AGCATACCACCAGATT	8	natural.killer.cell
10X_P4_7_AGCATACGTTGTGGAG	11	marginal.zone.B.cell.of.spleen
10X_P4_7_AGCCTAAAGTGTACCT	11	marginal.zone.B.cell.of.spleen
10X_P4_7_AGCCTAAAGTTAGCGG	11	marginal.zone.B.cell.of.spleen
10X_P4_7_AGCCTAACACCTCGGA	6	monocyte
10X_P4_7_AGCCTAACATCGGTTA	11	marginal.zone.B.cell.of.spleen
10X_P4_7_AGCCTAAGTTCACCTC	11	marginal.zone.B.cell.of.spleen
10X_P4_7_AGCCTAATCCTTGGTC	11	marginal.zone.B.cell.of.spleen
10X_P4_7_AGCCTAATCTGGAGCC	15	naive.thymus.derived.CD4.positive..alpha.beta.T.cell
10X_P4_7_AGCGGTCCACACAGAG	12	activated.CD4.positive..alpha.beta.T.cell
10X_P4_7_AGCGGTCCATCCTTGC	11	marginal.zone.B.cell.of.spleen
10X_P4_7_AGCGGTCCATGGTAGG	11	marginal.zone.B.cell.of.spleen
10X_P4_7_AGCGGTCGTCAAACTC	11	marginal.zone.B.cell.of.spleen
10X_P4_7_AGCGGTCGTGGCTCCA	5	mesenchymal.stem.cell
10X_P4_7_AGCGGTCGTTGGTAAA	11	marginal.zone.B.cell.of.spleen
10X_P4_7_AGCGGTCTCCGTAGGC	11	marginal.zone.B.cell.of.spleen
10X_P4_7_AGCGGTCTCTCGTTTA	13	CD8.positive..alpha.beta.memory.T.cell
10X_P4_7_AGCGGTCTCTGAGTGT	1	epithelial.cell
10X_P4_7_AGCGTATAGTCGCCGT	11	marginal.zone.B.cell.of.spleen
10X_P4_7_AGCGTATCAACTTGAC	2	macrophage
10X_P4_7_AGCGTATCACTGTGTA	11	marginal.zone.B.cell.of.spleen
10X_P4_7_AGCGTATGTGAGTGAC	5	mesenchymal.stem.cell
10X_P4_7_AGCGTCGAGTGGGTTG	11	marginal.zone.B.cell.of.spleen
10X_P4_7_AGCGTCGCACCGGAAA	11	marginal.zone.B.cell.of.spleen
10X_P4_7_AGCGTCGCAGATAATG	11	marginal.zone.B.cell.of.spleen
10X_P4_7_AGCGTCGCAGGAACGT	14	naive.thymus.derived.CD8.positive..alpha.beta.T.cell
10X_P4_7_AGCGTCGCATATACGC	11	marginal.zone.B.cell.of.spleen
10X_P4_7_AGCGTCGGTGCTAGCC	14	naive.thymus.derived.CD8.positive..alpha.beta.T.cell
10X_P4_7_AGCGTCGGTGTTCGAT	11	marginal.zone.B.cell.of.spleen
10X_P4_7_AGCGTCGTCTAACTGG	11	marginal.zone.B.cell.of.spleen
10X_P4_7_AGCGTCGTCTGCCAGG	8	natural.killer.cell
10X_P4_7_AGCTCCTAGGTGGGTT	11	marginal.zone.B.cell.of.spleen
10X_P4_7_AGCTCCTGTAAGCACG	11	marginal.zone.B.cell.of.spleen
10X_P4_7_AGCTCCTGTACCGTAT	15	naive.thymus.derived.CD4.positive..alpha.beta.T.cell
10X_P4_7_AGCTCCTGTATGAAAC	11	marginal.zone.B.cell.of.spleen
10X_P4_7_AGCTCCTTCTCGAGTA	5	mesenchymal.stem.cell
10X_P4_7_AGCTCCTTCTCTAAGG	11	marginal.zone.B.cell.of.spleen
10X_P4_7_AGCTCTCAGACGCAAC	11	marginal.zone.B.cell.of.spleen
10X_P4_7_AGCTCTCAGATATACG	13	CD8.positive..alpha.beta.memory.T.cell
10X_P4_7_AGCTCTCAGGTAGCTG	15	naive.thymus.derived.CD4.positive..alpha.beta.T.cell
10X_P4_7_AGCTCTCAGTCTCCTC	11	marginal.zone.B.cell.of.spleen
10X_P4_7_AGCTCTCTCGTACCGG	5	mesenchymal.stem.cell
10X_P4_7_AGCTCTCTCTATGTGG	11	marginal.zone.B.cell.of.spleen
10X_P4_7_AGCTTGACATACTCTT	11	marginal.zone.B.cell.of.spleen
10X_P4_7_AGCTTGACATCATCCC	11	marginal.zone.B.cell.of.spleen
10X_P4_7_AGCTTGAGTGGTAACG	9	follicular.B.cell
10X_P4_7_AGCTTGATCACTATTC	11	marginal.zone.B.cell.of.spleen
10X_P4_7_AGCTTGATCATTCACT	11	marginal.zone.B.cell.of.spleen
10X_P4_7_AGCTTGATCGTGACAT	11	marginal.zone.B.cell.of.spleen
10X_P4_7_AGCTTGATCGTTGACA	11	marginal.zone.B.cell.of.spleen
10X_P4_7_AGGCCACAGCGTGTCC	11	marginal.zone.B.cell.of.spleen
10X_P4_7_AGGCCACAGCTTATCG	15	naive.thymus.derived.CD4.positive..alpha.beta.T.cell
10X_P4_7_AGGCCACAGGGTTCCC	15	naive.thymus.derived.CD4.positive..alpha.beta.T.cell
10X_P4_7_AGGCCACAGTACATGA	15	naive.thymus.derived.CD4.positive..alpha.beta.T.cell
10X_P4_7_AGGCCACCAGGGCATA	11	marginal.zone.B.cell.of.spleen
10X_P4_7_AGGCCACCATCGACGC	11	marginal.zone.B.cell.of.spleen
10X_P4_7_AGGCCACTCACCATAG	11	marginal.zone.B.cell.of.spleen
10X_P4_7_AGGCCACTCGGTGTTA	11	marginal.zone.B.cell.of.spleen
10X_P4_7_AGGCCACTCTACCTGC	15	naive.thymus.derived.CD4.positive..alpha.beta.T.cell
10X_P4_7_AGGCCGTCAGGCTGAA	11	marginal.zone.B.cell.of.spleen
10X_P4_7_AGGCCGTGTAAATGAC	14	naive.thymus.derived.CD8.positive..alpha.beta.T.cell
10X_P4_7_AGGCCGTGTATATGGA	11	marginal.zone.B.cell.of.spleen
10X_P4_7_AGGCCGTGTGCCTTGG	11	marginal.zone.B.cell.of.spleen
10X_P4_7_AGGCCGTTCACCGTAA	11	marginal.zone.B.cell.of.spleen
10X_P4_7_AGGCCGTTCATGTCCC	11	marginal.zone.B.cell.of.spleen
10X_P4_7_AGGCCGTTCCTAGGGC	11	marginal.zone.B.cell.of.spleen
10X_P4_7_AGGGAGTAGTGTACGG	15	naive.thymus.derived.CD4.positive..alpha.beta.T.cell
10X_P4_7_AGGGAGTCAACACCCG	11	marginal.zone.B.cell.of.spleen
10X_P4_7_AGGGAGTCACCATGTA	14	naive.thymus.derived.CD8.positive..alpha.beta.T.cell
10X_P4_7_AGGGAGTGTTACTGAC	10	mature.NK.T.cell
10X_P4_7_AGGGAGTGTTCAACCA	15	naive.thymus.derived.CD4.positive..alpha.beta.T.cell
10X_P4_7_AGGGAGTTCGCGTAGC	11	marginal.zone.B.cell.of.spleen
10X_P4_7_AGGGAGTTCTGCGTAA	11	marginal.zone.B.cell.of.spleen
10X_P4_7_AGGGATGAGCTGCGAA	11	marginal.zone.B.cell.of.spleen
10X_P4_7_AGGGATGAGTTCGATC	11	marginal.zone.B.cell.of.spleen
10X_P4_7_AGGGATGCAAGGACTG	12	activated.CD4.positive..alpha.beta.T.cell
10X_P4_7_AGGGATGCACGCGAAA	11	marginal.zone.B.cell.of.spleen
10X_P4_7_AGGGATGCAGCTCCGA	11	marginal.zone.B.cell.of.spleen
10X_P4_7_AGGGATGTCACCATAG	7	conventional.dendritic.cell
10X_P4_7_AGGGATGTCATGCATG	14	naive.thymus.derived.CD8.positive..alpha.beta.T.cell
10X_P4_7_AGGGATGTCCCATTAT	12	activated.CD4.positive..alpha.beta.T.cell
10X_P4_7_AGGGTGAAGCAATCTC	11	marginal.zone.B.cell.of.spleen
10X_P4_7_AGGGTGAAGGTGATAT	11	marginal.zone.B.cell.of.spleen
10X_P4_7_AGGGTGAAGTGACTCT	13	CD8.positive..alpha.beta.memory.T.cell
10X_P4_7_AGGGTGACAAACAACA	11	marginal.zone.B.cell.of.spleen
10X_P4_7_AGGGTGACAAGTAATG	11	marginal.zone.B.cell.of.spleen
10X_P4_7_AGGGTGACACCACCAG	11	marginal.zone.B.cell.of.spleen
10X_P4_7_AGGGTGACAGCTGGCT	11	marginal.zone.B.cell.of.spleen
10X_P4_7_AGGGTGACATCGGGTC	10	mature.NK.T.cell
10X_P4_7_AGGGTGAGTCCGAACC	11	marginal.zone.B.cell.of.spleen
10X_P4_7_AGGGTGATCGGTGTTA	9	follicular.B.cell
10X_P4_7_AGGTCATCAGACGCAA	11	marginal.zone.B.cell.of.spleen
10X_P4_7_AGGTCATCAGCATACT	11	marginal.zone.B.cell.of.spleen
10X_P4_7_AGGTCATCATGCTAGT	11	marginal.zone.B.cell.of.spleen
10X_P4_7_AGGTCATGTTACTGAC	15	naive.thymus.derived.CD4.positive..alpha.beta.T.cell
10X_P4_7_AGGTCATTCCCTCTTT	11	marginal.zone.B.cell.of.spleen
10X_P4_7_AGGTCATTCGCCAAAT	5	mesenchymal.stem.cell
10X_P4_7_AGGTCCGAGGACACCA	1	epithelial.cell
10X_P4_7_AGGTCCGAGGACCACA	11	marginal.zone.B.cell.of.spleen
10X_P4_7_AGGTCCGCAATGTTGC	11	marginal.zone.B.cell.of.spleen
10X_P4_7_AGGTCCGTCAAACCAC	11	marginal.zone.B.cell.of.spleen
10X_P4_7_AGGTCCGTCCATTCTA	11	marginal.zone.B.cell.of.spleen
10X_P4_7_AGTAGTCTCAACCATG	11	marginal.zone.B.cell.of.spleen
10X_P4_7_AGTAGTCTCTCAAACG	11	marginal.zone.B.cell.of.spleen
10X_P4_7_AGTAGTCTCTTGACGA	6	monocyte
10X_P4_7_AGTCTTTAGAATGTTG	3	plasmacytoid.dendritic.cell
10X_P4_7_AGTCTTTAGAATTGTG	11	marginal.zone.B.cell.of.spleen
10X_P4_7_AGTCTTTAGACTCGGA	11	marginal.zone.B.cell.of.spleen
10X_P4_7_AGTCTTTCACCATCCT	5	mesenchymal.stem.cell
10X_P4_7_AGTCTTTGTAGCGTAG	11	marginal.zone.B.cell.of.spleen
10X_P4_7_AGTCTTTTCGTCTGAA	11	marginal.zone.B.cell.of.spleen
10X_P4_7_AGTGAGGAGACACTAA	11	marginal.zone.B.cell.of.spleen
10X_P4_7_AGTGAGGAGTGGGTTG	15	naive.thymus.derived.CD4.positive..alpha.beta.T.cell
10X_P4_7_AGTGAGGCAAGTCATC	11	marginal.zone.B.cell.of.spleen
10X_P4_7_AGTGAGGCACCAGATT	11	marginal.zone.B.cell.of.spleen
10X_P4_7_AGTGAGGCAGCTTAAC	11	marginal.zone.B.cell.of.spleen
10X_P4_7_AGTGAGGGTAGCAAAT	11	marginal.zone.B.cell.of.spleen
10X_P4_7_AGTGAGGGTGTTTGTG	11	marginal.zone.B.cell.of.spleen
10X_P4_7_AGTGGGAAGAGGTACC	11	marginal.zone.B.cell.of.spleen
10X_P4_7_AGTGGGAAGCTGTCTA	11	marginal.zone.B.cell.of.spleen
10X_P4_7_AGTGGGACAAGCGATG	11	marginal.zone.B.cell.of.spleen
10X_P4_7_AGTGGGACACTTAAGC	11	marginal.zone.B.cell.of.spleen
10X_P4_7_AGTGGGACAGGAATCG	8	natural.killer.cell
10X_P4_7_AGTGGGAGTACATCCA	2	macrophage
10X_P4_7_AGTGGGAGTGACGGTA	11	marginal.zone.B.cell.of.spleen
10X_P4_7_AGTGTCAAGACTTGAA	11	marginal.zone.B.cell.of.spleen
10X_P4_7_AGTGTCAAGAGTGACC	14	naive.thymus.derived.CD8.positive..alpha.beta.T.cell
10X_P4_7_AGTGTCAAGATGTAAC	14	naive.thymus.derived.CD8.positive..alpha.beta.T.cell
10X_P4_7_AGTGTCAAGTAAGTAC	11	marginal.zone.B.cell.of.spleen
10X_P4_7_AGTGTCAGTACCTACA	11	marginal.zone.B.cell.of.spleen
10X_P4_7_AGTGTCATCGCGTAGC	11	marginal.zone.B.cell.of.spleen
10X_P4_7_AGTTGGTAGCGGATCA	11	marginal.zone.B.cell.of.spleen
10X_P4_7_AGTTGGTAGTACATGA	11	marginal.zone.B.cell.of.spleen
10X_P4_7_AGTTGGTAGTGACTCT	12	activated.CD4.positive..alpha.beta.T.cell
10X_P4_7_AGTTGGTCATCGGGTC	11	marginal.zone.B.cell.of.spleen
10X_P4_7_AGTTGGTGTACCAGTT	11	marginal.zone.B.cell.of.spleen
10X_P4_7_AGTTGGTGTCGTCTTC	11	marginal.zone.B.cell.of.spleen
10X_P4_7_AGTTGGTGTTAAGAAC	13	CD8.positive..alpha.beta.memory.T.cell
10X_P4_7_AGTTGGTTCACTCTTA	13	CD8.positive..alpha.beta.memory.T.cell
10X_P4_7_AGTTGGTTCAGTGCAT	11	marginal.zone.B.cell.of.spleen
10X_P4_7_AGTTGGTTCCGAGCCA	11	marginal.zone.B.cell.of.spleen
10X_P4_7_ATAACGCAGCAACGGT	11	marginal.zone.B.cell.of.spleen
10X_P4_7_ATAACGCAGGTGTGGT	11	marginal.zone.B.cell.of.spleen
10X_P4_7_ATAACGCAGTCGTTTG	2	macrophage
10X_P4_7_ATAACGCCAAGGACTG	14	naive.thymus.derived.CD8.positive..alpha.beta.T.cell
10X_P4_7_ATAACGCGTAACGCGA	11	marginal.zone.B.cell.of.spleen
10X_P4_7_ATAACGCGTAAGAGGA	13	CD8.positive..alpha.beta.memory.T.cell
10X_P4_7_ATAACGCGTCTGCAAT	11	marginal.zone.B.cell.of.spleen
10X_P4_7_ATAACGCTCCACGTTC	11	marginal.zone.B.cell.of.spleen
10X_P4_7_ATAACGCTCCGAGCCA	11	marginal.zone.B.cell.of.spleen
10X_P4_7_ATAACGCTCTCGATGA	11	marginal.zone.B.cell.of.spleen
10X_P4_7_ATAAGAGAGATATGGT	11	marginal.zone.B.cell.of.spleen
10X_P4_7_ATAAGAGAGGAATGGA	11	marginal.zone.B.cell.of.spleen
10X_P4_7_ATAAGAGAGGACTGGT	11	marginal.zone.B.cell.of.spleen
10X_P4_7_ATAAGAGAGTCTCAAC	11	marginal.zone.B.cell.of.spleen
10X_P4_7_ATAAGAGCAAACCCAT	11	marginal.zone.B.cell.of.spleen
10X_P4_7_ATAAGAGCAGGGAGAG	11	marginal.zone.B.cell.of.spleen
10X_P4_7_ATAAGAGGTGCCTGGT	6	monocyte
10X_P4_7_ATAAGAGTCAGATAAG	11	marginal.zone.B.cell.of.spleen
10X_P4_7_ATAAGAGTCATATCGG	9	follicular.B.cell
10X_P4_7_ATAAGAGTCCGTTGCT	11	marginal.zone.B.cell.of.spleen
10X_P4_7_ATAAGAGTCGGTTAAC	8	natural.killer.cell
10X_P4_7_ATAGACCAGAGTGACC	11	marginal.zone.B.cell.of.spleen
10X_P4_7_ATAGACCAGCTGCAAG	9	follicular.B.cell
10X_P4_7_ATAGACCAGGATATAC	11	marginal.zone.B.cell.of.spleen
10X_P4_7_ATAGACCCAATGGAGC	14	naive.thymus.derived.CD8.positive..alpha.beta.T.cell
10X_P4_7_ATAGACCCAGGGCATA	15	naive.thymus.derived.CD4.positive..alpha.beta.T.cell
10X_P4_7_ATAGACCCAGTCAGCC	13	CD8.positive..alpha.beta.memory.T.cell
10X_P4_7_ATAGACCCATGTCCTC	11	marginal.zone.B.cell.of.spleen
10X_P4_7_ATAGACCGTCCCTTGT	14	naive.thymus.derived.CD8.positive..alpha.beta.T.cell
10X_P4_7_ATAGACCGTTCCAACA	15	naive.thymus.derived.CD4.positive..alpha.beta.T.cell
10X_P4_7_ATAGACCTCAACTCTT	11	marginal.zone.B.cell.of.spleen
10X_P4_7_ATAGACCTCATATCGG	11	marginal.zone.B.cell.of.spleen
10X_P4_7_ATAGACCTCCGCGGTA	14	naive.thymus.derived.CD8.positive..alpha.beta.T.cell
10X_P4_7_ATAGACCTCGGCATCG	11	marginal.zone.B.cell.of.spleen
10X_P4_7_ATCACGAAGAGTTGGC	14	naive.thymus.derived.CD8.positive..alpha.beta.T.cell
10X_P4_7_ATCACGAAGCGTTCCG	11	marginal.zone.B.cell.of.spleen
10X_P4_7_ATCACGAAGGGTGTTG	11	marginal.zone.B.cell.of.spleen
10X_P4_7_ATCACGACACACAGAG	15	naive.thymus.derived.CD4.positive..alpha.beta.T.cell
10X_P4_7_ATCACGACATATACCG	14	naive.thymus.derived.CD8.positive..alpha.beta.T.cell
10X_P4_7_ATCACGACATCGATTG	11	marginal.zone.B.cell.of.spleen
10X_P4_7_ATCACGACATGGTCTA	11	marginal.zone.B.cell.of.spleen
10X_P4_7_ATCACGACATTCCTCG	11	marginal.zone.B.cell.of.spleen
10X_P4_7_ATCACGAGTGTGTGCC	11	marginal.zone.B.cell.of.spleen
10X_P4_7_ATCACGATCAAAGACA	2	macrophage
10X_P4_7_ATCACGATCAGTCCCT	11	marginal.zone.B.cell.of.spleen
10X_P4_7_ATCACGATCGAACTGT	2	macrophage
10X_P4_7_ATCATCTAGAACTGTA	11	marginal.zone.B.cell.of.spleen
10X_P4_7_ATCATCTAGATGCGAC	11	marginal.zone.B.cell.of.spleen
10X_P4_7_ATCATCTAGCCCAGCT	11	marginal.zone.B.cell.of.spleen
10X_P4_7_ATCATCTAGCTACCGC	13	CD8.positive..alpha.beta.memory.T.cell
10X_P4_7_ATCATCTAGTTATCGC	11	marginal.zone.B.cell.of.spleen
10X_P4_7_ATCATCTAGTTTCCTT	11	marginal.zone.B.cell.of.spleen
10X_P4_7_ATCATCTCATGGTCAT	11	marginal.zone.B.cell.of.spleen
10X_P4_7_ATCATCTGTAATTGGA	11	marginal.zone.B.cell.of.spleen
10X_P4_7_ATCATCTGTGTGAAAT	11	marginal.zone.B.cell.of.spleen
10X_P4_7_ATCATCTTCGGCGCTA	12	activated.CD4.positive..alpha.beta.T.cell
10X_P4_7_ATCATGGCAACACGCC	11	marginal.zone.B.cell.of.spleen
10X_P4_7_ATCATGGGTGTGGCTC	9	follicular.B.cell
10X_P4_7_ATCATGGTCACATACG	11	marginal.zone.B.cell.of.spleen
10X_P4_7_ATCATGGTCAGCTGGC	11	marginal.zone.B.cell.of.spleen
10X_P4_7_ATCATGGTCGCTTGTC	15	naive.thymus.derived.CD4.positive..alpha.beta.T.cell
10X_P4_7_ATCCACCAGAGTGACC	11	marginal.zone.B.cell.of.spleen
10X_P4_7_ATCCACCCAATCACAC	11	marginal.zone.B.cell.of.spleen
10X_P4_7_ATCCACCGTAGGACAC	11	marginal.zone.B.cell.of.spleen
10X_P4_7_ATCCACCGTATCTGCA	11	marginal.zone.B.cell.of.spleen
10X_P4_7_ATCCACCGTTAAGTAG	12	activated.CD4.positive..alpha.beta.T.cell
10X_P4_7_ATCCACCTCCCTTGCA	11	marginal.zone.B.cell.of.spleen
10X_P4_7_ATCCACCTCCTGCTTG	11	marginal.zone.B.cell.of.spleen
10X_P4_7_ATCCACCTCTACCAGA	11	marginal.zone.B.cell.of.spleen
10X_P4_7_ATCCGAAAGCAGATCG	2	macrophage
10X_P4_7_ATCCGAACACAGGAGT	11	marginal.zone.B.cell.of.spleen
10X_P4_7_ATCCGAACAGGTCTCG	13	CD8.positive..alpha.beta.memory.T.cell
10X_P4_7_ATCCGAACATATGCTG	11	marginal.zone.B.cell.of.spleen
10X_P4_7_ATCCGAACATGGATGG	14	naive.thymus.derived.CD8.positive..alpha.beta.T.cell
10X_P4_7_ATCCGAACATTGAGCT	11	marginal.zone.B.cell.of.spleen
10X_P4_7_ATCGAGTAGAGCTTCT	11	marginal.zone.B.cell.of.spleen
10X_P4_7_ATCGAGTAGAGGTTAT	12	activated.CD4.positive..alpha.beta.T.cell
10X_P4_7_ATCGAGTAGCTAGCCC	13	CD8.positive..alpha.beta.memory.T.cell
10X_P4_7_ATCGAGTAGTGGGTTG	11	marginal.zone.B.cell.of.spleen
10X_P4_7_ATCGAGTAGTGGTAGC	11	marginal.zone.B.cell.of.spleen
10X_P4_7_ATCGAGTCAAAGTGCG	11	marginal.zone.B.cell.of.spleen
10X_P4_7_ATCGAGTCAAGTTAAG	11	marginal.zone.B.cell.of.spleen
10X_P4_7_ATCGAGTCACATGACT	11	marginal.zone.B.cell.of.spleen
10X_P4_7_ATCGAGTCACGTCTCT	5	mesenchymal.stem.cell
10X_P4_7_ATCGAGTTCGAGAGCA	11	marginal.zone.B.cell.of.spleen
10X_P4_7_ATCGAGTTCGGCCGAT	11	marginal.zone.B.cell.of.spleen
10X_P4_7_ATCTACTAGCCGATTT	11	marginal.zone.B.cell.of.spleen
10X_P4_7_ATCTACTAGGCAATTA	11	marginal.zone.B.cell.of.spleen
10X_P4_7_ATCTACTAGGGCTTCC	14	naive.thymus.derived.CD8.positive..alpha.beta.T.cell
10X_P4_7_ATCTACTAGTACATGA	11	marginal.zone.B.cell.of.spleen
10X_P4_7_ATCTACTGTCTCCACT	8	natural.killer.cell
10X_P4_7_ATCTACTTCACGAAGG	11	marginal.zone.B.cell.of.spleen
10X_P4_7_ATCTACTTCGTGACAT	11	marginal.zone.B.cell.of.spleen
10X_P4_7_ATCTGCCAGGTGTTAA	11	marginal.zone.B.cell.of.spleen
10X_P4_7_ATCTGCCAGTCCCACG	11	marginal.zone.B.cell.of.spleen
10X_P4_7_ATCTGCCCAAGGACAC	11	marginal.zone.B.cell.of.spleen
10X_P4_7_ATCTGCCCATGTCGAT	11	marginal.zone.B.cell.of.spleen
10X_P4_7_ATCTGCCTCACAGTAC	5	mesenchymal.stem.cell
10X_P4_7_ATCTGCCTCTTGAGGT	11	marginal.zone.B.cell.of.spleen
10X_P4_7_ATGAGGGAGAAGGTGA	11	marginal.zone.B.cell.of.spleen
10X_P4_7_ATGAGGGAGCCCAATT	11	marginal.zone.B.cell.of.spleen
10X_P4_7_ATGAGGGAGCGATCCC	11	marginal.zone.B.cell.of.spleen
10X_P4_7_ATGAGGGAGTCGTACT	11	marginal.zone.B.cell.of.spleen
10X_P4_7_ATGAGGGGTGACTACT	15	naive.thymus.derived.CD4.positive..alpha.beta.T.cell
10X_P4_7_ATGAGGGTCAGATAAG	11	marginal.zone.B.cell.of.spleen
10X_P4_7_ATGAGGGTCCCTTGTG	11	marginal.zone.B.cell.of.spleen
10X_P4_7_ATGAGGGTCCGGGTGT	11	marginal.zone.B.cell.of.spleen
10X_P4_7_ATGCGATAGCAGCCTC	11	marginal.zone.B.cell.of.spleen
10X_P4_7_ATGCGATAGCTATGCT	11	marginal.zone.B.cell.of.spleen
10X_P4_7_ATGCGATCACACTGCG	11	marginal.zone.B.cell.of.spleen
10X_P4_7_ATGCGATCAGAAGCAC	11	marginal.zone.B.cell.of.spleen
10X_P4_7_ATGCGATTCAGGATCT	11	marginal.zone.B.cell.of.spleen
10X_P4_7_ATGCGATTCATGTGGT	11	marginal.zone.B.cell.of.spleen
10X_P4_7_ATGCGATTCTGACCTC	11	marginal.zone.B.cell.of.spleen
10X_P4_7_ATGGGAGAGACCTAGG	8	natural.killer.cell
10X_P4_7_ATGGGAGAGGGATCTG	5	mesenchymal.stem.cell
10X_P4_7_ATGGGAGCAAACAACA	14	naive.thymus.derived.CD8.positive..alpha.beta.T.cell
10X_P4_7_ATGGGAGCAGTTCATG	13	CD8.positive..alpha.beta.memory.T.cell
10X_P4_7_ATGGGAGTCAGAAATG	11	marginal.zone.B.cell.of.spleen
10X_P4_7_ATGGGAGTCTGAGTGT	11	marginal.zone.B.cell.of.spleen
10X_P4_7_ATGTGTGAGACTGTAA	11	marginal.zone.B.cell.of.spleen
10X_P4_7_ATGTGTGAGGGTTCCC	11	marginal.zone.B.cell.of.spleen
10X_P4_7_ATGTGTGAGTATGACA	11	marginal.zone.B.cell.of.spleen
10X_P4_7_ATGTGTGCAAGACACG	11	marginal.zone.B.cell.of.spleen
10X_P4_7_ATGTGTGCAGCGAACA	7	conventional.dendritic.cell
10X_P4_7_ATGTGTGCATCGGTTA	6	monocyte
10X_P4_7_ATGTGTGGTAGTGAAT	11	marginal.zone.B.cell.of.spleen
10X_P4_7_ATGTGTGTCAGATAAG	11	marginal.zone.B.cell.of.spleen
10X_P4_7_ATTACTCAGGAGTTGC	11	marginal.zone.B.cell.of.spleen
10X_P4_7_ATTACTCAGGCAAAGA	7	conventional.dendritic.cell
10X_P4_7_ATTACTCGTATGGTTC	11	marginal.zone.B.cell.of.spleen
10X_P4_7_ATTACTCTCGCGCCAA	12	activated.CD4.positive..alpha.beta.T.cell
10X_P4_7_ATTATCCAGCTGCCCA	15	naive.thymus.derived.CD4.positive..alpha.beta.T.cell
10X_P4_7_ATTATCCAGGATGGAA	11	marginal.zone.B.cell.of.spleen
10X_P4_7_ATTATCCCAAGGCTCC	11	marginal.zone.B.cell.of.spleen
10X_P4_7_ATTATCCCAAGTAGTA	11	marginal.zone.B.cell.of.spleen
10X_P4_7_ATTATCCCACGGATAG	12	activated.CD4.positive..alpha.beta.T.cell
10X_P4_7_ATTATCCCAGACAAGC	11	marginal.zone.B.cell.of.spleen
10X_P4_7_ATTATCCGTAAATGTG	11	marginal.zone.B.cell.of.spleen
10X_P4_7_ATTATCCTCTGAAAGA	9	follicular.B.cell
10X_P4_7_ATTCTACCAAGACACG	11	marginal.zone.B.cell.of.spleen
10X_P4_7_ATTCTACCACATCCAA	15	naive.thymus.derived.CD4.positive..alpha.beta.T.cell
10X_P4_7_ATTCTACGTACAGTTC	5	mesenchymal.stem.cell
10X_P4_7_ATTCTACGTAGCGTAG	11	marginal.zone.B.cell.of.spleen
10X_P4_7_ATTGGTGAGAAGAAGC	8	natural.killer.cell
10X_P4_7_ATTGGTGAGTCAAGCG	11	marginal.zone.B.cell.of.spleen
10X_P4_7_ATTGGTGAGTGCAAGC	11	marginal.zone.B.cell.of.spleen
10X_P4_7_ATTGGTGCAAACGTGG	11	marginal.zone.B.cell.of.spleen
10X_P4_7_ATTGGTGCAATCACAC	11	marginal.zone.B.cell.of.spleen
10X_P4_7_ATTGGTGCACCTCGTT	11	marginal.zone.B.cell.of.spleen
10X_P4_7_ATTGGTGCAGATGAGC	11	marginal.zone.B.cell.of.spleen
10X_P4_7_ATTGGTGGTAATCACC	11	marginal.zone.B.cell.of.spleen
10X_P4_7_ATTTCTGAGTTTAGGA	14	naive.thymus.derived.CD8.positive..alpha.beta.T.cell
10X_P4_7_ATTTCTGCAATCAGAA	11	marginal.zone.B.cell.of.spleen
10X_P4_7_ATTTCTGCACAGAGGT	11	marginal.zone.B.cell.of.spleen
10X_P4_7_ATTTCTGGTCCCTACT	11	marginal.zone.B.cell.of.spleen
10X_P4_7_ATTTCTGGTCGAATCT	11	marginal.zone.B.cell.of.spleen
10X_P4_7_ATTTCTGGTTGCTCCT	15	naive.thymus.derived.CD4.positive..alpha.beta.T.cell
10X_P4_7_ATTTCTGTCGTTGACA	11	marginal.zone.B.cell.of.spleen
10X_P4_7_ATTTCTGTCTTCAACT	8	natural.killer.cell
10X_P4_7_ATTTCTGTCTTTCCTC	11	marginal.zone.B.cell.of.spleen
10X_P4_7_CAACCAAAGAGGGATA	12	activated.CD4.positive..alpha.beta.T.cell
10X_P4_7_CAACCAAAGTACGACG	11	marginal.zone.B.cell.of.spleen
10X_P4_7_CAACCAAAGTCTCGGC	11	marginal.zone.B.cell.of.spleen
10X_P4_7_CAACCAACATAGGATA	10	mature.NK.T.cell
10X_P4_7_CAACCAACATGACGGA	11	marginal.zone.B.cell.of.spleen
10X_P4_7_CAACCAACATTGCGGC	11	marginal.zone.B.cell.of.spleen
10X_P4_7_CAACCAAGTGCAACGA	14	naive.thymus.derived.CD8.positive..alpha.beta.T.cell
10X_P4_7_CAACCAATCAGCGATT	11	marginal.zone.B.cell.of.spleen
10X_P4_7_CAACCAATCAGTTCGA	11	marginal.zone.B.cell.of.spleen
10X_P4_7_CAACCAATCCTTTACA	11	marginal.zone.B.cell.of.spleen
10X_P4_7_CAACCTCAGCAGGCTA	11	marginal.zone.B.cell.of.spleen
10X_P4_7_CAACCTCAGCGCCTCA	5	mesenchymal.stem.cell
10X_P4_7_CAACCTCAGCGCCTTG	11	marginal.zone.B.cell.of.spleen
10X_P4_7_CAACCTCCAATAGCAA	15	naive.thymus.derived.CD4.positive..alpha.beta.T.cell
10X_P4_7_CAACCTCCACAAGTAA	11	marginal.zone.B.cell.of.spleen
10X_P4_7_CAACCTCCACTATCTT	11	marginal.zone.B.cell.of.spleen
10X_P4_7_CAACCTCCAGGTCTCG	11	marginal.zone.B.cell.of.spleen
10X_P4_7_CAACCTCGTTGATTGC	11	marginal.zone.B.cell.of.spleen
10X_P4_7_CAACCTCGTTTGCATG	11	marginal.zone.B.cell.of.spleen
10X_P4_7_CAACCTCTCAGTCCCT	13	CD8.positive..alpha.beta.memory.T.cell
10X_P4_7_CAACTAGCAATCAGAA	11	marginal.zone.B.cell.of.spleen
10X_P4_7_CAACTAGCACTCAGGC	12	activated.CD4.positive..alpha.beta.T.cell
10X_P4_7_CAACTAGCAGAGTGTG	14	naive.thymus.derived.CD8.positive..alpha.beta.T.cell
10X_P4_7_CAACTAGGTAGGAGTC	11	marginal.zone.B.cell.of.spleen
10X_P4_7_CAACTAGGTCCGAAGA	11	marginal.zone.B.cell.of.spleen
10X_P4_7_CAACTAGGTCCTCTTG	11	marginal.zone.B.cell.of.spleen
10X_P4_7_CAACTAGTCCAGTAGT	11	marginal.zone.B.cell.of.spleen
10X_P4_7_CAACTAGTCCCGGATG	11	marginal.zone.B.cell.of.spleen
10X_P4_7_CAACTAGTCTTCGGTC	11	marginal.zone.B.cell.of.spleen
10X_P4_7_CAACTAGTCTTGAGGT	12	activated.CD4.positive..alpha.beta.T.cell
10X_P4_7_CAAGAAACAGCTCGAC	11	marginal.zone.B.cell.of.spleen
10X_P4_7_CAAGAAACAGCTCGCA	11	marginal.zone.B.cell.of.spleen
10X_P4_7_CAAGAAACATATGAGA	11	marginal.zone.B.cell.of.spleen
10X_P4_7_CAAGAAAGTCAACATC	15	naive.thymus.derived.CD4.positive..alpha.beta.T.cell
10X_P4_7_CAAGAAAGTGTTAAGA	11	marginal.zone.B.cell.of.spleen
10X_P4_7_CAAGAAAGTTCCTCCA	11	marginal.zone.B.cell.of.spleen
10X_P4_7_CAAGAAATCAGGCCCA	11	marginal.zone.B.cell.of.spleen
10X_P4_7_CAAGATCAGAACTCGG	11	marginal.zone.B.cell.of.spleen
10X_P4_7_CAAGATCAGATCCCGC	11	marginal.zone.B.cell.of.spleen
10X_P4_7_CAAGATCCAATAGCGG	11	marginal.zone.B.cell.of.spleen
10X_P4_7_CAAGATCCACCAGATT	11	marginal.zone.B.cell.of.spleen
10X_P4_7_CAAGATCGTAGCGTGA	11	marginal.zone.B.cell.of.spleen
10X_P4_7_CAAGATCGTGATAAAC	11	marginal.zone.B.cell.of.spleen
10X_P4_7_CAAGATCGTGGTCCGT	2	macrophage
10X_P4_7_CAAGATCTCAACGAAA	11	marginal.zone.B.cell.of.spleen
10X_P4_7_CAAGATCTCGGTCCGA	11	marginal.zone.B.cell.of.spleen
10X_P4_7_CAAGATCTCTGCTTGC	11	marginal.zone.B.cell.of.spleen
10X_P4_7_CAAGGCCAGGCGACAT	11	marginal.zone.B.cell.of.spleen
10X_P4_7_CAAGGCCAGTGAACAT	14	naive.thymus.derived.CD8.positive..alpha.beta.T.cell
10X_P4_7_CAAGGCCAGTGTCTCA	11	marginal.zone.B.cell.of.spleen
10X_P4_7_CAAGGCCCACCTGGTG	11	marginal.zone.B.cell.of.spleen
10X_P4_7_CAAGGCCGTGGTAACG	11	marginal.zone.B.cell.of.spleen
10X_P4_7_CAAGGCCTCCCATTTA	11	marginal.zone.B.cell.of.spleen
10X_P4_7_CAAGTTGCATAAGACA	11	marginal.zone.B.cell.of.spleen
10X_P4_7_CAAGTTGGTGTTGGGA	11	marginal.zone.B.cell.of.spleen
10X_P4_7_CAAGTTGTCCGCTGTT	11	marginal.zone.B.cell.of.spleen
10X_P4_7_CACAAACAGACAATAC	11	marginal.zone.B.cell.of.spleen
10X_P4_7_CACAAACAGATAGTCA	11	marginal.zone.B.cell.of.spleen
10X_P4_7_CACAAACAGCTCCTTC	11	marginal.zone.B.cell.of.spleen
10X_P4_7_CACAAACCAAGTAATG	11	marginal.zone.B.cell.of.spleen
10X_P4_7_CACAAACCACATGGGA	11	marginal.zone.B.cell.of.spleen
10X_P4_7_CACAAACGTAGCTTGT	11	marginal.zone.B.cell.of.spleen
10X_P4_7_CACAAACTCAGCTCGG	8	natural.killer.cell
10X_P4_7_CACAAACTCCGTAGGC	11	marginal.zone.B.cell.of.spleen
10X_P4_7_CACACAAAGACTAAGT	11	marginal.zone.B.cell.of.spleen
10X_P4_7_CACACAAAGAGACGAA	11	marginal.zone.B.cell.of.spleen
10X_P4_7_CACACAAGTAGCGTGA	15	naive.thymus.derived.CD4.positive..alpha.beta.T.cell
10X_P4_7_CACACAAGTCCGAACC	11	marginal.zone.B.cell.of.spleen
10X_P4_7_CACACAAGTCGACTAT	15	naive.thymus.derived.CD4.positive..alpha.beta.T.cell
10X_P4_7_CACACAATCTGAAAGA	11	marginal.zone.B.cell.of.spleen
10X_P4_7_CACACCTAGTGCGTGA	11	marginal.zone.B.cell.of.spleen
10X_P4_7_CACACCTCAGCGATCC	3	plasmacytoid.dendritic.cell
10X_P4_7_CACACCTCATATGAGA	11	marginal.zone.B.cell.of.spleen
10X_P4_7_CACACCTGTCAGAAGC	11	marginal.zone.B.cell.of.spleen
10X_P4_7_CACACCTTCACCTTAT	11	marginal.zone.B.cell.of.spleen
10X_P4_7_CACACCTTCACTTCAT	11	marginal.zone.B.cell.of.spleen
10X_P4_7_CACACCTTCCGTTGCT	11	marginal.zone.B.cell.of.spleen
10X_P4_7_CACACTCAGATTACCC	11	marginal.zone.B.cell.of.spleen
10X_P4_7_CACACTCAGCTTCGCG	11	marginal.zone.B.cell.of.spleen
10X_P4_7_CACACTCAGTTCGCAT	8	natural.killer.cell
10X_P4_7_CACACTCCATGAAGTA	13	CD8.positive..alpha.beta.memory.T.cell
10X_P4_7_CACACTCGTGTTCGAT	11	marginal.zone.B.cell.of.spleen
10X_P4_7_CACACTCTCACATGCA	8	natural.killer.cell
10X_P4_7_CACACTCTCCGCATAA	12	activated.CD4.positive..alpha.beta.T.cell
10X_P4_7_CACAGGCAGTGGTCCC	12	activated.CD4.positive..alpha.beta.T.cell
10X_P4_7_CACAGGCCATCACGAT	11	marginal.zone.B.cell.of.spleen
10X_P4_7_CACAGGCGTGACTCAT	11	marginal.zone.B.cell.of.spleen
10X_P4_7_CACAGTAAGCGATCCC	11	marginal.zone.B.cell.of.spleen
10X_P4_7_CACAGTAAGCGATTCT	6	monocyte
10X_P4_7_CACAGTACAGGTGGAT	11	marginal.zone.B.cell.of.spleen
10X_P4_7_CACAGTAGTTAAGAAC	11	marginal.zone.B.cell.of.spleen
10X_P4_7_CACAGTATCCTAGTGA	14	naive.thymus.derived.CD8.positive..alpha.beta.T.cell
10X_P4_7_CACAGTATCTGTGCAA	11	marginal.zone.B.cell.of.spleen
10X_P4_7_CACATAGAGCATGGCA	14	naive.thymus.derived.CD8.positive..alpha.beta.T.cell
10X_P4_7_CACATAGAGGCATGTG	13	CD8.positive..alpha.beta.memory.T.cell
10X_P4_7_CACATAGCAATCAGAA	11	marginal.zone.B.cell.of.spleen
10X_P4_7_CACATAGCAGCCAGAA	11	marginal.zone.B.cell.of.spleen
10X_P4_7_CACATAGCATGACGGA	11	marginal.zone.B.cell.of.spleen
10X_P4_7_CACATAGGTAATTGGA	9	follicular.B.cell
10X_P4_7_CACATAGGTACTCAAC	11	marginal.zone.B.cell.of.spleen
10X_P4_7_CACATAGGTTATCACG	11	marginal.zone.B.cell.of.spleen
10X_P4_7_CACATAGTCCCTCTTT	11	marginal.zone.B.cell.of.spleen
10X_P4_7_CACATAGTCGTACGGC	14	naive.thymus.derived.CD8.positive..alpha.beta.T.cell
10X_P4_7_CACATAGTCTCCAGGG	11	marginal.zone.B.cell.of.spleen
10X_P4_7_CACATTTAGGCTACGA	11	marginal.zone.B.cell.of.spleen
10X_P4_7_CACATTTCAGAGTGTG	15	naive.thymus.derived.CD4.positive..alpha.beta.T.cell
10X_P4_7_CACATTTCAGTGACAG	11	marginal.zone.B.cell.of.spleen
10X_P4_7_CACATTTGTAGTACCT	11	marginal.zone.B.cell.of.spleen
10X_P4_7_CACATTTGTATAATGG	11	marginal.zone.B.cell.of.spleen
10X_P4_7_CACATTTGTCAATGTC	11	marginal.zone.B.cell.of.spleen
10X_P4_7_CACATTTGTCGACTGC	11	marginal.zone.B.cell.of.spleen
10X_P4_7_CACATTTGTGTCCTCT	8	natural.killer.cell
10X_P4_7_CACATTTGTTCAACCA	11	marginal.zone.B.cell.of.spleen
10X_P4_7_CACATTTTCCAATGGT	11	marginal.zone.B.cell.of.spleen
10X_P4_7_CACATTTTCCTAGGGC	15	naive.thymus.derived.CD4.positive..alpha.beta.T.cell
10X_P4_7_CACATTTTCTGGTATG	1	epithelial.cell
10X_P4_7_CACCACTAGCTAGGCA	11	marginal.zone.B.cell.of.spleen
10X_P4_7_CACCACTCAAGCTGTT	14	naive.thymus.derived.CD8.positive..alpha.beta.T.cell
10X_P4_7_CACCACTCAGCCTGTG	11	marginal.zone.B.cell.of.spleen
10X_P4_7_CACCACTCATCTCGCT	11	marginal.zone.B.cell.of.spleen
10X_P4_7_CACCACTTCCAAATGC	6	monocyte
10X_P4_7_CACCAGGAGATCTGCT	14	naive.thymus.derived.CD8.positive..alpha.beta.T.cell
10X_P4_7_CACCAGGAGGAGCGAG	11	marginal.zone.B.cell.of.spleen
10X_P4_7_CACCAGGAGTCCGGTC	5	mesenchymal.stem.cell
10X_P4_7_CACCAGGCAAGCGAGT	11	marginal.zone.B.cell.of.spleen
10X_P4_7_CACCAGGCACCTATCC	11	marginal.zone.B.cell.of.spleen
10X_P4_7_CACCAGGCACGGCCAT	11	marginal.zone.B.cell.of.spleen
10X_P4_7_CACCAGGGTAGCTGCC	7	conventional.dendritic.cell
10X_P4_7_CACCAGGGTTTGTTTC	14	naive.thymus.derived.CD8.positive..alpha.beta.T.cell
10X_P4_7_CACCAGGTCCGAACGC	11	marginal.zone.B.cell.of.spleen
10X_P4_7_CACCTTGAGGCTCATT	11	marginal.zone.B.cell.of.spleen
10X_P4_7_CACCTTGCAAGTCTAC	11	marginal.zone.B.cell.of.spleen
10X_P4_7_CACCTTGCACTCTGTC	11	marginal.zone.B.cell.of.spleen
10X_P4_7_CACCTTGCAGCTGTTA	5	mesenchymal.stem.cell
10X_P4_7_CACCTTGGTCTAGCGC	11	marginal.zone.B.cell.of.spleen
10X_P4_7_CACCTTGGTGTGCCTG	11	marginal.zone.B.cell.of.spleen
10X_P4_7_CACCTTGGTTGATTGC	11	marginal.zone.B.cell.of.spleen
10X_P4_7_CACCTTGTCAGGATCT	14	naive.thymus.derived.CD8.positive..alpha.beta.T.cell
10X_P4_7_CACCTTGTCCGAGCCA	11	marginal.zone.B.cell.of.spleen
10X_P4_7_CACCTTGTCCGATATG	11	marginal.zone.B.cell.of.spleen
10X_P4_7_CACTCCAAGCTAGTCT	11	marginal.zone.B.cell.of.spleen
10X_P4_7_CACTCCAAGGCTAGCA	11	marginal.zone.B.cell.of.spleen
10X_P4_7_CACTCCAAGTTCCACA	2	macrophage
10X_P4_7_CACTCCACACGAAATA	11	marginal.zone.B.cell.of.spleen
10X_P4_7_CACTCCAGTGCGGTAA	11	marginal.zone.B.cell.of.spleen
10X_P4_7_CACTCCATCGCTTAGA	11	marginal.zone.B.cell.of.spleen
10X_P4_7_CACTCCATCTCGCATC	11	marginal.zone.B.cell.of.spleen
10X_P4_7_CAGAATCAGATCTGAA	11	marginal.zone.B.cell.of.spleen
10X_P4_7_CAGAATCAGGCCCGTT	11	marginal.zone.B.cell.of.spleen
10X_P4_7_CAGAATCCACCCTATC	11	marginal.zone.B.cell.of.spleen
10X_P4_7_CAGAATCCAGTGGGAT	11	marginal.zone.B.cell.of.spleen
10X_P4_7_CAGAATCGTCACTGGC	15	naive.thymus.derived.CD4.positive..alpha.beta.T.cell
10X_P4_7_CAGAATCTCAAACAAG	11	marginal.zone.B.cell.of.spleen
10X_P4_7_CAGAGAGAGGCACATG	11	marginal.zone.B.cell.of.spleen
10X_P4_7_CAGAGAGAGTACACCT	11	marginal.zone.B.cell.of.spleen
10X_P4_7_CAGAGAGCAAGCCGCT	11	marginal.zone.B.cell.of.spleen
10X_P4_7_CAGAGAGCAATGGAGC	12	activated.CD4.positive..alpha.beta.T.cell
10X_P4_7_CAGAGAGCATGCTAGT	7	conventional.dendritic.cell
10X_P4_7_CAGAGAGGTTCCACGG	11	marginal.zone.B.cell.of.spleen
10X_P4_7_CAGAGAGTCCACGTGG	11	marginal.zone.B.cell.of.spleen
10X_P4_7_CAGAGAGTCGGTCTAA	11	marginal.zone.B.cell.of.spleen
10X_P4_7_CAGATCAAGTACATGA	11	marginal.zone.B.cell.of.spleen
10X_P4_7_CAGATCAAGTGGAGAA	11	marginal.zone.B.cell.of.spleen
10X_P4_7_CAGATCACACAGGAGT	11	marginal.zone.B.cell.of.spleen
10X_P4_7_CAGATCACACATTCGA	11	marginal.zone.B.cell.of.spleen
10X_P4_7_CAGATCAGTCAAAGAT	14	naive.thymus.derived.CD8.positive..alpha.beta.T.cell
10X_P4_7_CAGATCAGTTCAGGCC	11	marginal.zone.B.cell.of.spleen
10X_P4_7_CAGATCAGTTTGGCGC	11	marginal.zone.B.cell.of.spleen
10X_P4_7_CAGATCATCATCTGCC	11	marginal.zone.B.cell.of.spleen
10X_P4_7_CAGCAGCAGAAGAAGC	11	marginal.zone.B.cell.of.spleen
10X_P4_7_CAGCAGCAGAGACTTA	11	marginal.zone.B.cell.of.spleen
10X_P4_7_CAGCAGCAGCTCCTTC	11	marginal.zone.B.cell.of.spleen
10X_P4_7_CAGCAGCAGGGCTCTC	15	naive.thymus.derived.CD4.positive..alpha.beta.T.cell
10X_P4_7_CAGCAGCCACCGGAAA	11	marginal.zone.B.cell.of.spleen
10X_P4_7_CAGCAGCCATATGAGA	11	marginal.zone.B.cell.of.spleen
10X_P4_7_CAGCAGCGTAGGCATG	11	marginal.zone.B.cell.of.spleen
10X_P4_7_CAGCAGCTCTCCTATA	11	marginal.zone.B.cell.of.spleen
10X_P4_7_CAGCATAAGAACAACT	11	marginal.zone.B.cell.of.spleen
10X_P4_7_CAGCATAAGAGTTGGC	11	marginal.zone.B.cell.of.spleen
10X_P4_7_CAGCATAAGCCCAACC	11	marginal.zone.B.cell.of.spleen
10X_P4_7_CAGCATAAGGACGAAA	11	marginal.zone.B.cell.of.spleen
10X_P4_7_CAGCATAGTTCCGGCA	8	natural.killer.cell
10X_P4_7_CAGCATATCTGGTATG	8	natural.killer.cell
10X_P4_7_CAGCCGAAGACAAGCC	8	natural.killer.cell
10X_P4_7_CAGCCGAAGAGTGAGA	12	activated.CD4.positive..alpha.beta.T.cell
10X_P4_7_CAGCCGAAGTCCTCCT	11	marginal.zone.B.cell.of.spleen
10X_P4_7_CAGCCGACATTCGACA	11	marginal.zone.B.cell.of.spleen
10X_P4_7_CAGCCGAGTCAGTGGA	11	marginal.zone.B.cell.of.spleen
10X_P4_7_CAGCCGATCCATGAGT	11	marginal.zone.B.cell.of.spleen
10X_P4_7_CAGCGACAGCGATAGC	11	marginal.zone.B.cell.of.spleen
10X_P4_7_CAGCGACGTACCATCA	11	marginal.zone.B.cell.of.spleen
10X_P4_7_CAGCGACTCACATGCA	11	marginal.zone.B.cell.of.spleen
10X_P4_7_CAGCGACTCAGGTAAA	11	marginal.zone.B.cell.of.spleen
10X_P4_7_CAGCGACTCCAGATCA	11	marginal.zone.B.cell.of.spleen
10X_P4_7_CAGCTAAAGGGTGTGT	11	marginal.zone.B.cell.of.spleen
10X_P4_7_CAGCTAACAAGCCTAT	14	naive.thymus.derived.CD8.positive..alpha.beta.T.cell
10X_P4_7_CAGCTAACATCACGAT	11	marginal.zone.B.cell.of.spleen
10X_P4_7_CAGCTAAGTTCACGGC	11	marginal.zone.B.cell.of.spleen
10X_P4_7_CAGCTAAGTTGGGACA	11	marginal.zone.B.cell.of.spleen
10X_P4_7_CAGCTGGCACAGCCCA	11	marginal.zone.B.cell.of.spleen
10X_P4_7_CAGCTGGCACTAGTAC	8	natural.killer.cell
10X_P4_7_CAGCTGGGTGTGAATA	15	naive.thymus.derived.CD4.positive..alpha.beta.T.cell
10X_P4_7_CAGCTGGTCATGCAAC	12	activated.CD4.positive..alpha.beta.T.cell
10X_P4_7_CAGGTGCAGAACAATC	13	CD8.positive..alpha.beta.memory.T.cell
10X_P4_7_CAGGTGCCAAGCGATG	11	marginal.zone.B.cell.of.spleen
10X_P4_7_CAGGTGCCAATAACGA	14	naive.thymus.derived.CD8.positive..alpha.beta.T.cell
10X_P4_7_CAGGTGCCACGTCAGC	11	marginal.zone.B.cell.of.spleen
10X_P4_7_CAGGTGCGTCCCTTGT	11	marginal.zone.B.cell.of.spleen
10X_P4_7_CAGGTGCGTCGGCTCA	15	naive.thymus.derived.CD4.positive..alpha.beta.T.cell
10X_P4_7_CAGTAACAGCTACCGC	11	marginal.zone.B.cell.of.spleen
10X_P4_7_CAGTAACAGGCATTGG	11	marginal.zone.B.cell.of.spleen
10X_P4_7_CAGTAACCATCACGAT	11	marginal.zone.B.cell.of.spleen
10X_P4_7_CAGTAACGTCGCTTCT	11	marginal.zone.B.cell.of.spleen
10X_P4_7_CAGTAACTCGACCAGC	11	marginal.zone.B.cell.of.spleen
10X_P4_7_CAGTCCTAGCGATAGC	5	mesenchymal.stem.cell
10X_P4_7_CAGTCCTAGGGAAACA	12	activated.CD4.positive..alpha.beta.T.cell
10X_P4_7_CAGTCCTCAAAGGCGT	11	marginal.zone.B.cell.of.spleen
10X_P4_7_CAGTCCTCAAGACGTG	11	marginal.zone.B.cell.of.spleen
10X_P4_7_CAGTCCTGTACCAGTT	11	marginal.zone.B.cell.of.spleen
10X_P4_7_CATATGGAGCGCTTAT	8	natural.killer.cell
10X_P4_7_CATATGGAGCGTGAAC	11	marginal.zone.B.cell.of.spleen
10X_P4_7_CATATGGAGGCCATAG	11	marginal.zone.B.cell.of.spleen
10X_P4_7_CATATGGCAGATCCAT	3	plasmacytoid.dendritic.cell
10X_P4_7_CATATGGGTAAATGAC	11	marginal.zone.B.cell.of.spleen
10X_P4_7_CATATGGGTAAGGATT	12	activated.CD4.positive..alpha.beta.T.cell
10X_P4_7_CATATGGGTCATATCG	11	marginal.zone.B.cell.of.spleen
10X_P4_7_CATATTCAGATGGCGT	15	naive.thymus.derived.CD4.positive..alpha.beta.T.cell
10X_P4_7_CATATTCAGTCGAGTG	11	marginal.zone.B.cell.of.spleen
10X_P4_7_CATATTCGTAACGACG	11	marginal.zone.B.cell.of.spleen
10X_P4_7_CATATTCTCAGAGACG	7	conventional.dendritic.cell
10X_P4_7_CATATTCTCGACCAGC	11	marginal.zone.B.cell.of.spleen
10X_P4_7_CATATTCTCTACGAGT	11	marginal.zone.B.cell.of.spleen
10X_P4_7_CATCAAGAGAGTGAGA	7	conventional.dendritic.cell
10X_P4_7_CATCAAGAGTGGTAGC	7	conventional.dendritic.cell
10X_P4_7_CATCAAGCACGGCCAT	11	marginal.zone.B.cell.of.spleen
10X_P4_7_CATCAAGGTGTGGCTC	11	marginal.zone.B.cell.of.spleen
10X_P4_7_CATCAAGTCAATACCG	11	marginal.zone.B.cell.of.spleen
10X_P4_7_CATCAAGTCACCGTAA	15	naive.thymus.derived.CD4.positive..alpha.beta.T.cell
10X_P4_7_CATCAAGTCAGTCAGT	2	macrophage
10X_P4_7_CATCAGACAAGGTGTG	11	marginal.zone.B.cell.of.spleen
10X_P4_7_CATCAGACAGGGATTG	11	marginal.zone.B.cell.of.spleen
10X_P4_7_CATCAGAGTAGCGCTC	11	marginal.zone.B.cell.of.spleen
10X_P4_7_CATCAGAGTGTCGCTG	11	marginal.zone.B.cell.of.spleen
10X_P4_7_CATCAGAGTTCGTGAT	13	CD8.positive..alpha.beta.memory.T.cell
10X_P4_7_CATCAGATCCTCGCAT	15	naive.thymus.derived.CD4.positive..alpha.beta.T.cell
10X_P4_7_CATCCACAGCTACCTA	11	marginal.zone.B.cell.of.spleen
10X_P4_7_CATCCACCAGGTTTCA	11	marginal.zone.B.cell.of.spleen
10X_P4_7_CATCCACCATTGGGCC	7	conventional.dendritic.cell
10X_P4_7_CATCCACGTTGCTCCT	11	marginal.zone.B.cell.of.spleen
10X_P4_7_CATCCACTCTTCTGGC	5	mesenchymal.stem.cell
10X_P4_7_CATCGAAAGTGCGTGA	11	marginal.zone.B.cell.of.spleen
10X_P4_7_CATCGAACACAGGTTT	11	marginal.zone.B.cell.of.spleen
10X_P4_7_CATCGAACATGGGACA	11	marginal.zone.B.cell.of.spleen
10X_P4_7_CATCGAATCACTTACT	11	marginal.zone.B.cell.of.spleen
10X_P4_7_CATCGAATCTAACTTC	11	marginal.zone.B.cell.of.spleen
10X_P4_7_CATCGGGAGACGCTTT	14	naive.thymus.derived.CD8.positive..alpha.beta.T.cell
10X_P4_7_CATCGGGAGACTGTAA	13	CD8.positive..alpha.beta.memory.T.cell
10X_P4_7_CATCGGGAGTCCATAC	11	marginal.zone.B.cell.of.spleen
10X_P4_7_CATCGGGGTAAGGGAA	11	marginal.zone.B.cell.of.spleen
10X_P4_7_CATCGGGTCGCATGGC	8	natural.killer.cell
10X_P4_7_CATGACAAGAGGACGG	11	marginal.zone.B.cell.of.spleen
10X_P4_7_CATGACACACAAGACG	15	naive.thymus.derived.CD4.positive..alpha.beta.T.cell
10X_P4_7_CATGACACACTTAAGC	11	marginal.zone.B.cell.of.spleen
10X_P4_7_CATGACACAGCTTAAC	15	naive.thymus.derived.CD4.positive..alpha.beta.T.cell
10X_P4_7_CATGACACAGGTCGTC	6	monocyte
10X_P4_7_CATGACATCATCACCC	11	marginal.zone.B.cell.of.spleen
10X_P4_7_CATGACATCGAACGGA	11	marginal.zone.B.cell.of.spleen
10X_P4_7_CATGCCTAGATATACG	8	natural.killer.cell
10X_P4_7_CATGCCTAGCCAGTTT	11	marginal.zone.B.cell.of.spleen
10X_P4_7_CATGCCTAGCGTCAAG	11	marginal.zone.B.cell.of.spleen
10X_P4_7_CATGCCTAGCGTCTAT	11	marginal.zone.B.cell.of.spleen
10X_P4_7_CATGCCTAGGTGCTTT	6	monocyte
10X_P4_7_CATGCCTAGTGTACGG	11	marginal.zone.B.cell.of.spleen
10X_P4_7_CATGCCTGTAGAGCTG	13	CD8.positive..alpha.beta.memory.T.cell
10X_P4_7_CATGCCTTCAGAGCTT	12	activated.CD4.positive..alpha.beta.T.cell
10X_P4_7_CATGCCTTCATCACCC	11	marginal.zone.B.cell.of.spleen
10X_P4_7_CATGGCGAGCGGATCA	11	marginal.zone.B.cell.of.spleen
10X_P4_7_CATGGCGCATTCTCAT	11	marginal.zone.B.cell.of.spleen
10X_P4_7_CATGGCGGTCCGCTGA	11	marginal.zone.B.cell.of.spleen
10X_P4_7_CATGGCGGTGTATGGG	10	mature.NK.T.cell
10X_P4_7_CATGGCGGTTCCAACA	11	marginal.zone.B.cell.of.spleen
10X_P4_7_CATGGCGTCTTGCATT	6	monocyte
10X_P4_7_CATTATCAGATATGCA	2	macrophage
10X_P4_7_CATTATCAGCAAATCA	11	marginal.zone.B.cell.of.spleen
10X_P4_7_CATTATCAGGGTTTCT	11	marginal.zone.B.cell.of.spleen
10X_P4_7_CATTATCCATAGTAAG	11	marginal.zone.B.cell.of.spleen
10X_P4_7_CATTATCGTCTTCAAG	11	marginal.zone.B.cell.of.spleen
10X_P4_7_CATTATCTCCGCAAGC	11	marginal.zone.B.cell.of.spleen
10X_P4_7_CATTCGCAGGCGTACA	11	marginal.zone.B.cell.of.spleen
10X_P4_7_CATTCGCCAGAGTGTG	7	conventional.dendritic.cell
10X_P4_7_CATTCGCCATCATCCC	4	T1.B.cell
10X_P4_7_CATTCGCCATGACATC	15	naive.thymus.derived.CD4.positive..alpha.beta.T.cell
10X_P4_7_CATTCGCCATGCTAGT	11	marginal.zone.B.cell.of.spleen
10X_P4_7_CATTCGCGTATATGGA	8	natural.killer.cell
10X_P4_7_CATTCGCGTCTAGCCG	11	marginal.zone.B.cell.of.spleen
10X_P4_7_CATTCGCGTGGTAACG	11	marginal.zone.B.cell.of.spleen
10X_P4_7_CATTCGCGTTGCTCCT	13	CD8.positive..alpha.beta.memory.T.cell
10X_P4_7_CATTCGCTCGACGGAA	11	marginal.zone.B.cell.of.spleen
10X_P4_7_CATTCGCTCTATCGCC	11	marginal.zone.B.cell.of.spleen
10X_P4_7_CCAATCCAGCGTTGCC	12	activated.CD4.positive..alpha.beta.T.cell
10X_P4_7_CCAATCCAGCTTTGGT	11	marginal.zone.B.cell.of.spleen
10X_P4_7_CCAATCCAGGCAAAGA	11	marginal.zone.B.cell.of.spleen
10X_P4_7_CCAATCCCATACAGCT	11	marginal.zone.B.cell.of.spleen
10X_P4_7_CCAATCCGTTACGTCA	14	naive.thymus.derived.CD8.positive..alpha.beta.T.cell
10X_P4_7_CCACCTAAGTCTTGCA	11	marginal.zone.B.cell.of.spleen
10X_P4_7_CCACCTACAAATCCGT	10	mature.NK.T.cell
10X_P4_7_CCACCTACAAGTCTAC	11	marginal.zone.B.cell.of.spleen
10X_P4_7_CCACCTACACATTTCT	11	marginal.zone.B.cell.of.spleen
10X_P4_7_CCACCTACAGGGCATA	11	marginal.zone.B.cell.of.spleen
10X_P4_7_CCACCTACATTAGGCT	12	activated.CD4.positive..alpha.beta.T.cell
10X_P4_7_CCACCTAGTGCTCTTC	2	macrophage
10X_P4_7_CCACCTAGTGTGTGCC	11	marginal.zone.B.cell.of.spleen
10X_P4_7_CCACCTAGTTAAGAAC	15	naive.thymus.derived.CD4.positive..alpha.beta.T.cell
10X_P4_7_CCACCTATCACGATGT	11	marginal.zone.B.cell.of.spleen
10X_P4_7_CCACCTATCCGTACAA	11	marginal.zone.B.cell.of.spleen
10X_P4_7_CCACGGAAGAAGCCCA	11	marginal.zone.B.cell.of.spleen
10X_P4_7_CCACGGAAGGTAGCCA	11	marginal.zone.B.cell.of.spleen
10X_P4_7_CCACGGACAAGTACCT	11	marginal.zone.B.cell.of.spleen
10X_P4_7_CCACGGAGTAAATACG	2	macrophage
10X_P4_7_CCACGGAGTCACAAGG	11	marginal.zone.B.cell.of.spleen
10X_P4_7_CCACGGATCCTGTAGA	12	activated.CD4.positive..alpha.beta.T.cell
10X_P4_7_CCACGGATCGTAGGTT	11	marginal.zone.B.cell.of.spleen
10X_P4_7_CCACTACAGATGGGTC	11	marginal.zone.B.cell.of.spleen
10X_P4_7_CCACTACAGCTGCGAA	8	natural.killer.cell
10X_P4_7_CCACTACAGGGTATCG	11	marginal.zone.B.cell.of.spleen
10X_P4_7_CCACTACCACCAGGCT	9	follicular.B.cell
10X_P4_7_CCACTACCAGATGGGT	11	marginal.zone.B.cell.of.spleen
10X_P4_7_CCACTACCATCAGTCA	11	marginal.zone.B.cell.of.spleen
10X_P4_7_CCACTACTCAGTCAGT	11	marginal.zone.B.cell.of.spleen
10X_P4_7_CCACTACTCCTAAGTG	11	marginal.zone.B.cell.of.spleen
10X_P4_7_CCACTACTCTCACATT	11	marginal.zone.B.cell.of.spleen
10X_P4_7_CCACTACTCTTGTACT	11	marginal.zone.B.cell.of.spleen
10X_P4_7_CCAGCGAAGAGCTTCT	11	marginal.zone.B.cell.of.spleen
10X_P4_7_CCAGCGAAGAGTGACC	11	marginal.zone.B.cell.of.spleen
10X_P4_7_CCAGCGAAGAGTTGGC	11	marginal.zone.B.cell.of.spleen
10X_P4_7_CCAGCGACAAGAAAGG	11	marginal.zone.B.cell.of.spleen
10X_P4_7_CCAGCGAGTACCGGCT	11	marginal.zone.B.cell.of.spleen
10X_P4_7_CCAGCGAGTCACCTAA	4	T1.B.cell
10X_P4_7_CCAGCGAGTGTAACGG	11	marginal.zone.B.cell.of.spleen
10X_P4_7_CCATGTCAGATAGCAT	13	CD8.positive..alpha.beta.memory.T.cell
10X_P4_7_CCATGTCAGATCGATA	11	marginal.zone.B.cell.of.spleen
10X_P4_7_CCATGTCCACTACAGT	11	marginal.zone.B.cell.of.spleen
10X_P4_7_CCATGTCCATACGCCG	15	naive.thymus.derived.CD4.positive..alpha.beta.T.cell
10X_P4_7_CCATGTCGTCCGAATT	5	mesenchymal.stem.cell
10X_P4_7_CCATGTCTCGTCGTTC	11	marginal.zone.B.cell.of.spleen
10X_P4_7_CCATGTCTCTAGCACA	11	marginal.zone.B.cell.of.spleen
10X_P4_7_CCATTCGAGCTTCGCG	11	marginal.zone.B.cell.of.spleen
10X_P4_7_CCATTCGAGGCTCAGA	14	naive.thymus.derived.CD8.positive..alpha.beta.T.cell
10X_P4_7_CCATTCGCAGGCGATA	15	naive.thymus.derived.CD4.positive..alpha.beta.T.cell
10X_P4_7_CCATTCGCATCGGGTC	11	marginal.zone.B.cell.of.spleen
10X_P4_7_CCATTCGGTGGTTTCA	11	marginal.zone.B.cell.of.spleen
10X_P4_7_CCATTCGTCTGTCCGT	6	monocyte
10X_P4_7_CCATTCGTCTTACCTA	11	marginal.zone.B.cell.of.spleen
10X_P4_7_CCCAATCCAAGTCTAC	14	naive.thymus.derived.CD8.positive..alpha.beta.T.cell
10X_P4_7_CCCAATCCAATCTACG	11	marginal.zone.B.cell.of.spleen
10X_P4_7_CCCAATCCACGCTTTC	11	marginal.zone.B.cell.of.spleen
10X_P4_7_CCCAATCCAGCTTCGG	11	marginal.zone.B.cell.of.spleen
10X_P4_7_CCCAATCGTATGAAAC	11	marginal.zone.B.cell.of.spleen
10X_P4_7_CCCAATCGTCTAGCGC	11	marginal.zone.B.cell.of.spleen
10X_P4_7_CCCAATCGTGACCAAG	14	naive.thymus.derived.CD8.positive..alpha.beta.T.cell
10X_P4_7_CCCAATCGTTATGTGC	7	conventional.dendritic.cell
10X_P4_7_CCCAATCTCCTTTCGG	11	marginal.zone.B.cell.of.spleen
10X_P4_7_CCCAATCTCTACTTAC	11	marginal.zone.B.cell.of.spleen
10X_P4_7_CCCAGTTCAACTGGCC	11	marginal.zone.B.cell.of.spleen
10X_P4_7_CCCAGTTCACGTAAGG	11	marginal.zone.B.cell.of.spleen
10X_P4_7_CCCAGTTCACTTCGAA	11	marginal.zone.B.cell.of.spleen
10X_P4_7_CCCAGTTCATGGGACA	14	naive.thymus.derived.CD8.positive..alpha.beta.T.cell
10X_P4_7_CCCAGTTGTTAAAGTG	2	macrophage
10X_P4_7_CCCAGTTGTTCGTCTC	15	naive.thymus.derived.CD4.positive..alpha.beta.T.cell
10X_P4_7_CCCAGTTTCACCACCT	5	mesenchymal.stem.cell
10X_P4_7_CCCAGTTTCTGAGTGT	11	marginal.zone.B.cell.of.spleen
10X_P4_7_CCCATACAGCTCTCGG	5	mesenchymal.stem.cell
10X_P4_7_CCCATACAGGATATAC	11	marginal.zone.B.cell.of.spleen
10X_P4_7_CCCATACCAATGGAAT	11	marginal.zone.B.cell.of.spleen
10X_P4_7_CCCATACCACAGGCCT	14	naive.thymus.derived.CD8.positive..alpha.beta.T.cell
10X_P4_7_CCCATACCACCTTGTC	8	natural.killer.cell
10X_P4_7_CCCATACCATGGATGG	11	marginal.zone.B.cell.of.spleen
10X_P4_7_CCCATACGTTACGCGC	11	marginal.zone.B.cell.of.spleen
10X_P4_7_CCCATACTCAAGCCTA	2	macrophage
10X_P4_7_CCCATACTCACCTTAT	11	marginal.zone.B.cell.of.spleen
10X_P4_7_CCCATACTCCTCCTAG	11	marginal.zone.B.cell.of.spleen
10X_P4_7_CCCTCCTAGACAGGCT	11	marginal.zone.B.cell.of.spleen
10X_P4_7_CCCTCCTAGAGTTGGC	11	marginal.zone.B.cell.of.spleen
10X_P4_7_CCCTCCTCACACATGT	11	marginal.zone.B.cell.of.spleen
10X_P4_7_CCCTCCTCACGGCGTT	11	marginal.zone.B.cell.of.spleen
10X_P4_7_CCCTCCTCATTTGCTT	11	marginal.zone.B.cell.of.spleen
10X_P4_7_CCCTCCTGTCGTGGCT	11	marginal.zone.B.cell.of.spleen
10X_P4_7_CCCTCCTGTGCAACGA	11	marginal.zone.B.cell.of.spleen
10X_P4_7_CCCTCCTGTGCGCTTG	11	marginal.zone.B.cell.of.spleen
10X_P4_7_CCCTCCTTCGCGCCAA	7	conventional.dendritic.cell
10X_P4_7_CCCTCCTTCTGAGTGT	12	activated.CD4.positive..alpha.beta.T.cell
10X_P4_7_CCGGGATCACATGGGA	11	marginal.zone.B.cell.of.spleen
10X_P4_7_CCGGGATTCGCATGAT	4	T1.B.cell
10X_P4_7_CCGGTAGAGGCAGTCA	1	epithelial.cell
10X_P4_7_CCGGTAGAGGTAAACT	11	marginal.zone.B.cell.of.spleen
10X_P4_7_CCGGTAGAGGTAGCCA	11	marginal.zone.B.cell.of.spleen
10X_P4_7_CCGGTAGCAATGGAAT	11	marginal.zone.B.cell.of.spleen
10X_P4_7_CCGGTAGCACGAAACG	11	marginal.zone.B.cell.of.spleen
10X_P4_7_CCGGTAGTCTGCAGTA	11	marginal.zone.B.cell.of.spleen
10X_P4_7_CCGTACTAGATAGCAT	14	naive.thymus.derived.CD8.positive..alpha.beta.T.cell
10X_P4_7_CCGTACTGTACAGTGG	11	marginal.zone.B.cell.of.spleen
10X_P4_7_CCGTACTGTCTCGTTC	11	marginal.zone.B.cell.of.spleen
10X_P4_7_CCGTACTGTGTGACGA	13	CD8.positive..alpha.beta.memory.T.cell
10X_P4_7_CCGTACTTCAAGGCTT	11	marginal.zone.B.cell.of.spleen
10X_P4_7_CCGTACTTCTCTAGGA	14	naive.thymus.derived.CD8.positive..alpha.beta.T.cell
10X_P4_7_CCGTGGAAGGATCGCA	11	marginal.zone.B.cell.of.spleen
10X_P4_7_CCGTGGAAGTAATCCC	2	macrophage
10X_P4_7_CCGTGGAGTTCTGGTA	8	natural.killer.cell
10X_P4_7_CCGTTCAAGCCACTAT	11	marginal.zone.B.cell.of.spleen
10X_P4_7_CCGTTCACAAGTACCT	11	marginal.zone.B.cell.of.spleen
10X_P4_7_CCGTTCACAGCCTGTG	2	macrophage
10X_P4_7_CCGTTCACAGGAATCG	11	marginal.zone.B.cell.of.spleen
10X_P4_7_CCGTTCACATCAGTAC	15	naive.thymus.derived.CD4.positive..alpha.beta.T.cell
10X_P4_7_CCGTTCAGTAGTGAAT	11	marginal.zone.B.cell.of.spleen
10X_P4_7_CCGTTCAGTCGAGTTT	9	follicular.B.cell
10X_P4_7_CCGTTCATCAAACGGG	14	naive.thymus.derived.CD8.positive..alpha.beta.T.cell
10X_P4_7_CCGTTCATCCTTTACA	11	marginal.zone.B.cell.of.spleen
10X_P4_7_CCGTTCATCGTCGTTC	15	naive.thymus.derived.CD4.positive..alpha.beta.T.cell
10X_P4_7_CCTAAAGAGCTAAGAT	11	marginal.zone.B.cell.of.spleen
10X_P4_7_CCTAAAGAGTACGATA	11	marginal.zone.B.cell.of.spleen
10X_P4_7_CCTAAAGAGTTGAGTA	11	marginal.zone.B.cell.of.spleen
10X_P4_7_CCTAAAGCACAGCGTC	14	naive.thymus.derived.CD8.positive..alpha.beta.T.cell
10X_P4_7_CCTAAAGCAGATAATG	11	marginal.zone.B.cell.of.spleen
10X_P4_7_CCTAAAGGTCCGTTAA	11	marginal.zone.B.cell.of.spleen
10X_P4_7_CCTAAAGGTCTCTTTA	15	naive.thymus.derived.CD4.positive..alpha.beta.T.cell
10X_P4_7_CCTAAAGGTCTGCGGT	11	marginal.zone.B.cell.of.spleen
10X_P4_7_CCTAAAGGTGGCGAAT	11	marginal.zone.B.cell.of.spleen
10X_P4_7_CCTAAAGGTTTGTTTC	11	marginal.zone.B.cell.of.spleen
10X_P4_7_CCTAAAGTCACATGCA	11	marginal.zone.B.cell.of.spleen
10X_P4_7_CCTAAAGTCCTAGAAC	14	naive.thymus.derived.CD8.positive..alpha.beta.T.cell
10X_P4_7_CCTAAAGTCTCTAAGG	14	naive.thymus.derived.CD8.positive..alpha.beta.T.cell
10X_P4_7_CCTACACGTAAGGATT	11	marginal.zone.B.cell.of.spleen
10X_P4_7_CCTACACGTCCAGTTA	13	CD8.positive..alpha.beta.memory.T.cell
10X_P4_7_CCTACACGTCCGTGAC	11	marginal.zone.B.cell.of.spleen
10X_P4_7_CCTACACGTGACAAAT	11	marginal.zone.B.cell.of.spleen
10X_P4_7_CCTACACGTGTGCGTC	11	marginal.zone.B.cell.of.spleen
10X_P4_7_CCTACACTCACTGGGC	11	marginal.zone.B.cell.of.spleen
10X_P4_7_CCTACACTCGGAATCT	6	monocyte
10X_P4_7_CCTACCAAGAAACCAT	15	naive.thymus.derived.CD4.positive..alpha.beta.T.cell
10X_P4_7_CCTACCAAGATGAGAG	11	marginal.zone.B.cell.of.spleen
10X_P4_7_CCTACCAAGCGATCCC	11	marginal.zone.B.cell.of.spleen
10X_P4_7_CCTACCACAAGAAGAG	11	marginal.zone.B.cell.of.spleen
10X_P4_7_CCTACCACACAAGCCC	11	marginal.zone.B.cell.of.spleen
10X_P4_7_CCTACCATCACTTATC	11	marginal.zone.B.cell.of.spleen
10X_P4_7_CCTACCATCTCAAACG	11	marginal.zone.B.cell.of.spleen
10X_P4_7_CCTAGCTAGAGGGATA	11	marginal.zone.B.cell.of.spleen
10X_P4_7_CCTAGCTGTACCAGTT	11	marginal.zone.B.cell.of.spleen
10X_P4_7_CCTAGCTGTTCGTCTC	11	marginal.zone.B.cell.of.spleen
10X_P4_7_CCTAGCTTCCGTCAAA	11	marginal.zone.B.cell.of.spleen
10X_P4_7_CCTAGCTTCCTTTCTC	15	naive.thymus.derived.CD4.positive..alpha.beta.T.cell
10X_P4_7_CCTAGCTTCTCGTATT	11	marginal.zone.B.cell.of.spleen
10X_P4_7_CCTATTAAGCTATGCT	11	marginal.zone.B.cell.of.spleen
10X_P4_7_CCTATTAAGCTGATAA	11	marginal.zone.B.cell.of.spleen
10X_P4_7_CCTATTAAGGCCCTCA	10	mature.NK.T.cell
10X_P4_7_CCTATTACACGAAACG	11	marginal.zone.B.cell.of.spleen
10X_P4_7_CCTATTACACTGTCGG	11	marginal.zone.B.cell.of.spleen
10X_P4_7_CCTATTAGTCGAACAG	11	marginal.zone.B.cell.of.spleen
10X_P4_7_CCTATTATCCACGAAT	11	marginal.zone.B.cell.of.spleen
10X_P4_7_CCTCAGTAGCCATCGC	11	marginal.zone.B.cell.of.spleen
10X_P4_7_CCTCAGTAGGCTACGA	11	marginal.zone.B.cell.of.spleen
10X_P4_7_CCTCAGTAGGGTCGAT	11	marginal.zone.B.cell.of.spleen
10X_P4_7_CCTCAGTAGGTGATAT	14	naive.thymus.derived.CD8.positive..alpha.beta.T.cell
10X_P4_7_CCTCAGTGTCACTTCC	11	marginal.zone.B.cell.of.spleen
10X_P4_7_CCTCAGTGTTGCGTTA	11	marginal.zone.B.cell.of.spleen
10X_P4_7_CCTCAGTTCACATACG	11	marginal.zone.B.cell.of.spleen
10X_P4_7_CCTCAGTTCCTGCAGG	11	marginal.zone.B.cell.of.spleen
10X_P4_7_CCTCAGTTCGACGGAA	11	marginal.zone.B.cell.of.spleen
10X_P4_7_CCTCAGTTCTCGCATC	11	marginal.zone.B.cell.of.spleen
10X_P4_7_CCTTACGAGATGTTAG	11	marginal.zone.B.cell.of.spleen
10X_P4_7_CCTTACGAGTGCCATT	11	marginal.zone.B.cell.of.spleen
10X_P4_7_CCTTACGCACGACGAA	11	marginal.zone.B.cell.of.spleen
10X_P4_7_CCTTACGGTCAAGCGA	11	marginal.zone.B.cell.of.spleen
10X_P4_7_CCTTACGGTGAGTATA	2	macrophage
10X_P4_7_CCTTACGGTGATGCCC	11	marginal.zone.B.cell.of.spleen
10X_P4_7_CCTTACGTCCTGCCAT	11	marginal.zone.B.cell.of.spleen
10X_P4_7_CCTTCCCAGAATCTCC	12	activated.CD4.positive..alpha.beta.T.cell
10X_P4_7_CCTTCCCCACATTTCT	11	marginal.zone.B.cell.of.spleen
10X_P4_7_CCTTCCCCAGTACACT	15	naive.thymus.derived.CD4.positive..alpha.beta.T.cell
10X_P4_7_CCTTCCCGTCTTCGTC	11	marginal.zone.B.cell.of.spleen
10X_P4_7_CCTTCCCGTGTCGCTG	11	marginal.zone.B.cell.of.spleen
10X_P4_7_CCTTCGAAGATAGTCA	11	marginal.zone.B.cell.of.spleen
10X_P4_7_CCTTCGAAGCAATATG	14	naive.thymus.derived.CD8.positive..alpha.beta.T.cell
10X_P4_7_CCTTCGAAGGATGGAA	14	naive.thymus.derived.CD8.positive..alpha.beta.T.cell
10X_P4_7_CCTTCGAAGGTGACCA	11	marginal.zone.B.cell.of.spleen
10X_P4_7_CCTTCGACAGACTCGC	11	marginal.zone.B.cell.of.spleen
10X_P4_7_CCTTCGACATCAGTCA	8	natural.killer.cell
10X_P4_7_CCTTCGAGTCTGATTG	11	marginal.zone.B.cell.of.spleen
10X_P4_7_CCTTCGATCAGTTAGC	10	mature.NK.T.cell
10X_P4_7_CCTTCGATCCCTTGCA	11	marginal.zone.B.cell.of.spleen
10X_P4_7_CCTTCGATCTGCGACG	11	marginal.zone.B.cell.of.spleen
10X_P4_7_CCTTCGATCTGGAGCC	11	marginal.zone.B.cell.of.spleen
10X_P4_7_CCTTTCTAGATTACCC	11	marginal.zone.B.cell.of.spleen
10X_P4_7_CCTTTCTCAAGCTGGA	11	marginal.zone.B.cell.of.spleen
10X_P4_7_CCTTTCTCACTAGTAC	11	marginal.zone.B.cell.of.spleen
10X_P4_7_CCTTTCTCATTCCTCG	9	follicular.B.cell
10X_P4_7_CCTTTCTGTGCGATAG	11	marginal.zone.B.cell.of.spleen
10X_P4_7_CCTTTCTGTTGGACCC	11	marginal.zone.B.cell.of.spleen
10X_P4_7_CCTTTCTTCCGTTGTC	11	marginal.zone.B.cell.of.spleen
10X_P4_7_CCTTTCTTCTGGTTCC	11	marginal.zone.B.cell.of.spleen
10X_P4_7_CGAACATAGGATGTAT	9	follicular.B.cell
10X_P4_7_CGAACATCACAAGACG	11	marginal.zone.B.cell.of.spleen
10X_P4_7_CGAACATCACATTCGA	15	naive.thymus.derived.CD4.positive..alpha.beta.T.cell
10X_P4_7_CGAACATCAGGAATCG	11	marginal.zone.B.cell.of.spleen
10X_P4_7_CGAACATCATAACCTG	11	marginal.zone.B.cell.of.spleen
10X_P4_7_CGAACATGTTCATGGT	8	natural.killer.cell
10X_P4_7_CGAACATTCCTTAATC	14	naive.thymus.derived.CD8.positive..alpha.beta.T.cell
10X_P4_7_CGAATGTAGAGCAATT	10	mature.NK.T.cell
10X_P4_7_CGAATGTAGAGTCGGT	11	marginal.zone.B.cell.of.spleen
10X_P4_7_CGAATGTAGCCAGAAC	14	naive.thymus.derived.CD8.positive..alpha.beta.T.cell
10X_P4_7_CGAATGTAGGCGCTCT	11	marginal.zone.B.cell.of.spleen
10X_P4_7_CGAATGTAGTACGACG	2	macrophage
10X_P4_7_CGAATGTAGTCCATAC	11	marginal.zone.B.cell.of.spleen
10X_P4_7_CGAATGTCAGGTCTCG	11	marginal.zone.B.cell.of.spleen
10X_P4_7_CGAATGTGTATATCCG	8	natural.killer.cell
10X_P4_7_CGAATGTGTCCCTTGT	11	marginal.zone.B.cell.of.spleen
10X_P4_7_CGAATGTGTTGTACAC	11	marginal.zone.B.cell.of.spleen
10X_P4_7_CGAATGTTCACCACCT	14	naive.thymus.derived.CD8.positive..alpha.beta.T.cell
10X_P4_7_CGACCTTAGATAGTCA	11	marginal.zone.B.cell.of.spleen
10X_P4_7_CGACCTTGTGCAACTT	11	marginal.zone.B.cell.of.spleen
10X_P4_7_CGACCTTGTTAAGACA	11	marginal.zone.B.cell.of.spleen
10X_P4_7_CGACCTTGTTCACGGC	11	marginal.zone.B.cell.of.spleen
10X_P4_7_CGACCTTTCCAAACAC	11	marginal.zone.B.cell.of.spleen
10X_P4_7_CGACCTTTCTCTTGAT	11	marginal.zone.B.cell.of.spleen
10X_P4_7_CGACCTTTCTTGACGA	12	activated.CD4.positive..alpha.beta.T.cell
10X_P4_7_CGACTTCAGACTAAGT	3	plasmacytoid.dendritic.cell
10X_P4_7_CGACTTCAGTTAGGTA	11	marginal.zone.B.cell.of.spleen
10X_P4_7_CGACTTCCAATCGGTT	9	follicular.B.cell
10X_P4_7_CGACTTCCAGCTTAAC	10	mature.NK.T.cell
10X_P4_7_CGACTTCGTCGGGTCT	12	activated.CD4.positive..alpha.beta.T.cell
10X_P4_7_CGAGAAGAGAGAACAG	2	macrophage
10X_P4_7_CGAGAAGCAAACAACA	11	marginal.zone.B.cell.of.spleen
10X_P4_7_CGAGAAGCACCAGGTC	11	marginal.zone.B.cell.of.spleen
10X_P4_7_CGAGAAGGTACAGTGG	11	marginal.zone.B.cell.of.spleen
10X_P4_7_CGAGAAGGTACCGTAT	11	marginal.zone.B.cell.of.spleen
10X_P4_7_CGAGAAGGTAGAAGGA	11	marginal.zone.B.cell.of.spleen
10X_P4_7_CGAGAAGGTTCCATGA	11	marginal.zone.B.cell.of.spleen
10X_P4_7_CGAGAAGGTTTAAGCC	9	follicular.B.cell
10X_P4_7_CGAGAAGTCAAACGGG	11	marginal.zone.B.cell.of.spleen
10X_P4_7_CGAGAAGTCGTTACGA	11	marginal.zone.B.cell.of.spleen
10X_P4_7_CGAGAAGTCTTTAGGG	11	marginal.zone.B.cell.of.spleen
10X_P4_7_CGAGCACCAAGAAAGG	11	marginal.zone.B.cell.of.spleen
10X_P4_7_CGAGCACTCTTGTACT	11	marginal.zone.B.cell.of.spleen
10X_P4_7_CGAGCCAGTCTCGTTC	6	monocyte
10X_P4_7_CGAGCCAGTGCACCAC	11	marginal.zone.B.cell.of.spleen
10X_P4_7_CGAGCCAGTGTCTGAT	11	marginal.zone.B.cell.of.spleen
10X_P4_7_CGAGCCAGTTGAGTTC	11	marginal.zone.B.cell.of.spleen
10X_P4_7_CGAGCCATCCGCAAGC	11	marginal.zone.B.cell.of.spleen
10X_P4_7_CGATCGGAGAGGTTAT	11	marginal.zone.B.cell.of.spleen
10X_P4_7_CGATCGGAGCCCAACC	14	naive.thymus.derived.CD8.positive..alpha.beta.T.cell
10X_P4_7_CGATCGGAGGGAACGG	7	conventional.dendritic.cell
10X_P4_7_CGATCGGCACTTACGA	11	marginal.zone.B.cell.of.spleen
10X_P4_7_CGATCGGCAGCTGCTG	11	marginal.zone.B.cell.of.spleen
10X_P4_7_CGATCGGGTAGAGCTG	9	follicular.B.cell
10X_P4_7_CGATCGGGTGATGATA	11	marginal.zone.B.cell.of.spleen
10X_P4_7_CGATCGGGTTATGCGT	9	follicular.B.cell
10X_P4_7_CGATCGGTCTTAGAGC	2	macrophage
10X_P4_7_CGATGGCAGGATGGAA	11	marginal.zone.B.cell.of.spleen
10X_P4_7_CGATGGCAGGCTAGGT	11	marginal.zone.B.cell.of.spleen
10X_P4_7_CGATGGCCACGCCAGT	11	marginal.zone.B.cell.of.spleen
10X_P4_7_CGATGGCCATCGATTG	11	marginal.zone.B.cell.of.spleen
10X_P4_7_CGATGGCCATCGGTTA	7	conventional.dendritic.cell
10X_P4_7_CGATGGCGTATAGTAG	11	marginal.zone.B.cell.of.spleen
10X_P4_7_CGATGGCGTGCGAAAC	11	marginal.zone.B.cell.of.spleen
10X_P4_7_CGATGGCTCCTCAACC	11	marginal.zone.B.cell.of.spleen
10X_P4_7_CGATGGCTCTCGCATC	11	marginal.zone.B.cell.of.spleen
10X_P4_7_CGATGGCTCTGTCAAG	11	marginal.zone.B.cell.of.spleen
10X_P4_7_CGATGGCTCTGTCCGT	11	marginal.zone.B.cell.of.spleen
10X_P4_7_CGATGTAAGAGCTTCT	11	marginal.zone.B.cell.of.spleen
10X_P4_7_CGATGTAAGTCGCCGT	11	marginal.zone.B.cell.of.spleen
10X_P4_7_CGATGTAAGTGTCCCG	11	marginal.zone.B.cell.of.spleen
10X_P4_7_CGATGTACATTATCTC	11	marginal.zone.B.cell.of.spleen
10X_P4_7_CGATTGAAGACTACAA	11	marginal.zone.B.cell.of.spleen
10X_P4_7_CGATTGAAGTGTTTGC	7	conventional.dendritic.cell
10X_P4_7_CGATTGACAGCGTCCA	11	marginal.zone.B.cell.of.spleen
10X_P4_7_CGATTGACATACAGCT	11	marginal.zone.B.cell.of.spleen
10X_P4_7_CGATTGAGTATTAGCC	11	marginal.zone.B.cell.of.spleen
10X_P4_7_CGATTGAGTTCTCATT	3	plasmacytoid.dendritic.cell
10X_P4_7_CGATTGATCACTTCAT	8	natural.killer.cell
10X_P4_7_CGATTGATCGAGCCCA	10	mature.NK.T.cell
10X_P4_7_CGATTGATCGATCCCT	11	marginal.zone.B.cell.of.spleen
10X_P4_7_CGCCAAGCATTACGAC	11	marginal.zone.B.cell.of.spleen
10X_P4_7_CGCCAAGGTAGCCTAT	11	marginal.zone.B.cell.of.spleen
10X_P4_7_CGCCAAGTCTGTTTGT	8	natural.killer.cell
10X_P4_7_CGCGGTAAGAGTGACC	11	marginal.zone.B.cell.of.spleen
10X_P4_7_CGCGGTAAGTCCAGGA	11	marginal.zone.B.cell.of.spleen
10X_P4_7_CGCGGTAAGTGGAGTC	11	marginal.zone.B.cell.of.spleen
10X_P4_7_CGCGGTACAAAGTCAA	11	marginal.zone.B.cell.of.spleen
10X_P4_7_CGCGGTACAAGCGATG	11	marginal.zone.B.cell.of.spleen
10X_P4_7_CGCGGTACACAGGCCT	7	conventional.dendritic.cell
10X_P4_7_CGCGGTACACTGAAGG	11	marginal.zone.B.cell.of.spleen
10X_P4_7_CGCGGTACAGGTGGAT	11	marginal.zone.B.cell.of.spleen
10X_P4_7_CGCGGTACATCTCCCA	11	marginal.zone.B.cell.of.spleen
10X_P4_7_CGCGGTAGTAAAGGAG	9	follicular.B.cell
10X_P4_7_CGCGGTAGTAAGGATT	15	naive.thymus.derived.CD4.positive..alpha.beta.T.cell
10X_P4_7_CGCGGTAGTCATATGC	11	marginal.zone.B.cell.of.spleen
10X_P4_7_CGCGGTAGTCGAACAG	11	marginal.zone.B.cell.of.spleen
10X_P4_7_CGCGGTATCAGAGACG	13	CD8.positive..alpha.beta.memory.T.cell
10X_P4_7_CGCGGTATCCGTAGGC	11	marginal.zone.B.cell.of.spleen
10X_P4_7_CGCGGTATCCTGTAGA	11	marginal.zone.B.cell.of.spleen
10X_P4_7_CGCGTTTAGTGCCATT	15	naive.thymus.derived.CD4.positive..alpha.beta.T.cell
10X_P4_7_CGCGTTTAGTGGACGT	11	marginal.zone.B.cell.of.spleen
10X_P4_7_CGCGTTTGTTCTGGTA	2	macrophage
10X_P4_7_CGCTATCAGCGTAGTG	11	marginal.zone.B.cell.of.spleen
10X_P4_7_CGCTATCCAAACCTAC	11	marginal.zone.B.cell.of.spleen
10X_P4_7_CGCTATCGTCTCTTAT	11	marginal.zone.B.cell.of.spleen
10X_P4_7_CGCTATCGTTGTCTTT	11	marginal.zone.B.cell.of.spleen
10X_P4_7_CGCTGGACATCGATTG	7	conventional.dendritic.cell
10X_P4_7_CGCTGGACATGCTAGT	11	marginal.zone.B.cell.of.spleen
10X_P4_7_CGCTGGAGTAACGACG	11	marginal.zone.B.cell.of.spleen
10X_P4_7_CGCTGGATCTCCCTGA	11	marginal.zone.B.cell.of.spleen
10X_P4_7_CGCTTCAAGAAGAAGC	11	marginal.zone.B.cell.of.spleen
10X_P4_7_CGCTTCAAGAGATGAG	11	marginal.zone.B.cell.of.spleen
10X_P4_7_CGCTTCAAGCGTCTAT	15	naive.thymus.derived.CD4.positive..alpha.beta.T.cell
10X_P4_7_CGCTTCAAGCTTCGCG	10	mature.NK.T.cell
10X_P4_7_CGCTTCAAGGATGGTC	11	marginal.zone.B.cell.of.spleen
10X_P4_7_CGCTTCACATATGGTC	11	marginal.zone.B.cell.of.spleen
10X_P4_7_CGCTTCATCGGCATCG	6	monocyte
10X_P4_7_CGGACACAGAAACGCC	11	marginal.zone.B.cell.of.spleen
10X_P4_7_CGGACACAGCCAGGAT	11	marginal.zone.B.cell.of.spleen
10X_P4_7_CGGACACAGTCAAGCG	2	macrophage
10X_P4_7_CGGACACCACATGTGT	11	marginal.zone.B.cell.of.spleen
10X_P4_7_CGGACACCACCCTATC	5	mesenchymal.stem.cell
10X_P4_7_CGGACACGTAAGGGAA	7	conventional.dendritic.cell
10X_P4_7_CGGACACGTCATATCG	11	marginal.zone.B.cell.of.spleen
10X_P4_7_CGGACACGTGATGTCT	11	marginal.zone.B.cell.of.spleen
10X_P4_7_CGGACACTCAATACCG	15	naive.thymus.derived.CD4.positive..alpha.beta.T.cell
10X_P4_7_CGGACACTCTGTGCAA	11	marginal.zone.B.cell.of.spleen
10X_P4_7_CGGACACTCTTACCTA	5	mesenchymal.stem.cell
10X_P4_7_CGGACGTAGAGGTTAT	8	natural.killer.cell
10X_P4_7_CGGACGTAGATCCGAG	11	marginal.zone.B.cell.of.spleen
10X_P4_7_CGGACGTAGATGTCGG	11	marginal.zone.B.cell.of.spleen
10X_P4_7_CGGACGTAGGCCATAG	11	marginal.zone.B.cell.of.spleen
10X_P4_7_CGGACGTCACGTCAGC	11	marginal.zone.B.cell.of.spleen
10X_P4_7_CGGACGTGTGTTGGGA	11	marginal.zone.B.cell.of.spleen
10X_P4_7_CGGACTGAGCCGATTT	14	naive.thymus.derived.CD8.positive..alpha.beta.T.cell
10X_P4_7_CGGACTGAGTTTGCGT	7	conventional.dendritic.cell
10X_P4_7_CGGACTGCACCGCTAG	15	naive.thymus.derived.CD4.positive..alpha.beta.T.cell
10X_P4_7_CGGACTGCACTTCGAA	10	mature.NK.T.cell
10X_P4_7_CGGACTGGTAAATGAC	5	mesenchymal.stem.cell
10X_P4_7_CGGACTGGTTCCGGCA	8	natural.killer.cell
10X_P4_7_CGGACTGTCCGTAGGC	11	marginal.zone.B.cell.of.spleen
10X_P4_7_CGGAGCTAGATGGGTC	11	marginal.zone.B.cell.of.spleen
10X_P4_7_CGGAGCTAGTACTTGC	11	marginal.zone.B.cell.of.spleen
10X_P4_7_CGGAGCTGTGCCTGGT	14	naive.thymus.derived.CD8.positive..alpha.beta.T.cell
10X_P4_7_CGGAGCTGTTCTGGTA	11	marginal.zone.B.cell.of.spleen
10X_P4_7_CGGAGTCAGAAGGTGA	11	marginal.zone.B.cell.of.spleen
10X_P4_7_CGGAGTCAGCTAGTCT	11	marginal.zone.B.cell.of.spleen
10X_P4_7_CGGAGTCAGGTCATCT	11	marginal.zone.B.cell.of.spleen
10X_P4_7_CGGAGTCAGTACGCCC	1	epithelial.cell
10X_P4_7_CGGAGTCGTACCGCTG	7	conventional.dendritic.cell
10X_P4_7_CGGAGTCTCCGCAAGC	13	CD8.positive..alpha.beta.memory.T.cell
10X_P4_7_CGGCTAGGTCTGATTG	12	activated.CD4.positive..alpha.beta.T.cell
10X_P4_7_CGGCTAGTCAGCTCGG	9	follicular.B.cell
10X_P4_7_CGGCTAGTCGTCACGG	11	marginal.zone.B.cell.of.spleen
10X_P4_7_CGGGTCAAGACTACAA	14	naive.thymus.derived.CD8.positive..alpha.beta.T.cell
10X_P4_7_CGGGTCAAGCTAACAA	11	marginal.zone.B.cell.of.spleen
10X_P4_7_CGGGTCACAACCGCCA	11	marginal.zone.B.cell.of.spleen
10X_P4_7_CGGGTCACAGCCTGTG	11	marginal.zone.B.cell.of.spleen
10X_P4_7_CGGGTCACATGATCCA	11	marginal.zone.B.cell.of.spleen
10X_P4_7_CGGGTCAGTCTACCTC	11	marginal.zone.B.cell.of.spleen
10X_P4_7_CGGTTAAAGACACGAC	11	marginal.zone.B.cell.of.spleen
10X_P4_7_CGGTTAAAGATCGGGT	12	activated.CD4.positive..alpha.beta.T.cell
10X_P4_7_CGGTTAAAGCGTCTAT	12	activated.CD4.positive..alpha.beta.T.cell
10X_P4_7_CGGTTAAAGGTAGCTG	15	naive.thymus.derived.CD4.positive..alpha.beta.T.cell
10X_P4_7_CGGTTAAAGTTAACGA	11	marginal.zone.B.cell.of.spleen
10X_P4_7_CGGTTAACAGCGTAAG	14	naive.thymus.derived.CD8.positive..alpha.beta.T.cell
10X_P4_7_CGGTTAAGTCCGACGT	2	macrophage
10X_P4_7_CGGTTAATCCGCGCAA	11	marginal.zone.B.cell.of.spleen
10X_P4_7_CGGTTAATCGGCATCG	11	marginal.zone.B.cell.of.spleen
10X_P4_7_CGGTTAATCTGCGTAA	14	naive.thymus.derived.CD8.positive..alpha.beta.T.cell
10X_P4_7_CGGTTAATCTTGTTTG	11	marginal.zone.B.cell.of.spleen
10X_P4_7_CGTAGCGAGAAAGTGG	2	macrophage
10X_P4_7_CGTAGCGAGATGTCGG	11	marginal.zone.B.cell.of.spleen
10X_P4_7_CGTAGCGAGGGTTCCC	11	marginal.zone.B.cell.of.spleen
10X_P4_7_CGTAGCGAGGTGCTAG	15	naive.thymus.derived.CD4.positive..alpha.beta.T.cell
10X_P4_7_CGTAGCGCAAGCCCAC	11	marginal.zone.B.cell.of.spleen
10X_P4_7_CGTAGCGGTCGGATCC	11	marginal.zone.B.cell.of.spleen
10X_P4_7_CGTAGCGTCGCTTGTC	11	marginal.zone.B.cell.of.spleen
10X_P4_7_CGTAGGCCAAGCCCAC	11	marginal.zone.B.cell.of.spleen
10X_P4_7_CGTAGGCCACGGACAA	1	epithelial.cell
10X_P4_7_CGTAGGCGTAATAGCA	11	marginal.zone.B.cell.of.spleen
10X_P4_7_CGTAGGCGTGGCCCTA	10	mature.NK.T.cell
10X_P4_7_CGTAGGCTCAGTTCGA	11	marginal.zone.B.cell.of.spleen
10X_P4_7_CGTAGGCTCGCATGGC	11	marginal.zone.B.cell.of.spleen
10X_P4_7_CGTAGGCTCTTCAACT	14	naive.thymus.derived.CD8.positive..alpha.beta.T.cell
10X_P4_7_CGTCACTAGCCCAGCT	11	marginal.zone.B.cell.of.spleen
10X_P4_7_CGTCACTAGCTAGTGG	11	marginal.zone.B.cell.of.spleen
10X_P4_7_CGTCACTCACCGCTAG	11	marginal.zone.B.cell.of.spleen
10X_P4_7_CGTCACTGTCCATCCT	11	marginal.zone.B.cell.of.spleen
10X_P4_7_CGTCACTTCATATCGG	11	marginal.zone.B.cell.of.spleen
10X_P4_7_CGTCACTTCCCATTTA	2	macrophage
10X_P4_7_CGTCACTTCTTAGAGC	14	naive.thymus.derived.CD8.positive..alpha.beta.T.cell
10X_P4_7_CGTCAGGAGAGCTTCT	11	marginal.zone.B.cell.of.spleen
10X_P4_7_CGTCAGGAGGCGATAC	11	marginal.zone.B.cell.of.spleen
10X_P4_7_CGTCAGGAGGTAAACT	14	naive.thymus.derived.CD8.positive..alpha.beta.T.cell
10X_P4_7_CGTCAGGCAAACTGCT	14	naive.thymus.derived.CD8.positive..alpha.beta.T.cell
10X_P4_7_CGTCAGGCAACTGCTA	11	marginal.zone.B.cell.of.spleen
10X_P4_7_CGTCAGGCACATGTGT	11	marginal.zone.B.cell.of.spleen
10X_P4_7_CGTCAGGGTGCTTCTC	11	marginal.zone.B.cell.of.spleen
10X_P4_7_CGTCAGGGTTACCGAT	11	marginal.zone.B.cell.of.spleen
10X_P4_7_CGTCAGGGTTGAGGTG	10	mature.NK.T.cell
10X_P4_7_CGTCAGGTCACGACTA	11	marginal.zone.B.cell.of.spleen
10X_P4_7_CGTCAGGTCTCAAGTG	9	follicular.B.cell
10X_P4_7_CGTCCATAGAAGGTGA	11	marginal.zone.B.cell.of.spleen
10X_P4_7_CGTCCATAGACCTAGG	11	marginal.zone.B.cell.of.spleen
10X_P4_7_CGTCCATAGAGGTAGA	11	marginal.zone.B.cell.of.spleen
10X_P4_7_CGTCCATAGCCTTGAT	11	marginal.zone.B.cell.of.spleen
10X_P4_7_CGTCCATGTTATGCGT	2	macrophage
10X_P4_7_CGTCCATGTTCGTCTC	11	marginal.zone.B.cell.of.spleen
10X_P4_7_CGTCCATTCCTTGCCA	14	naive.thymus.derived.CD8.positive..alpha.beta.T.cell
10X_P4_7_CGTCCATTCGGAGCAA	14	naive.thymus.derived.CD8.positive..alpha.beta.T.cell
10X_P4_7_CGTCCATTCTGACCTC	5	mesenchymal.stem.cell
10X_P4_7_CGTCTACAGACATAAC	11	marginal.zone.B.cell.of.spleen
10X_P4_7_CGTCTACGTCTAGTCA	11	marginal.zone.B.cell.of.spleen
10X_P4_7_CGTCTACGTTCCGGCA	11	marginal.zone.B.cell.of.spleen
10X_P4_7_CGTCTACTCCATGCTC	11	marginal.zone.B.cell.of.spleen
10X_P4_7_CGTCTACTCTTGTTTG	11	marginal.zone.B.cell.of.spleen
10X_P4_7_CGTGAGCCACCACGTG	11	marginal.zone.B.cell.of.spleen
10X_P4_7_CGTGAGCCATGTCTCC	11	marginal.zone.B.cell.of.spleen
10X_P4_7_CGTGAGCGTAACGTTC	11	marginal.zone.B.cell.of.spleen
10X_P4_7_CGTGAGCGTGATAAGT	11	marginal.zone.B.cell.of.spleen
10X_P4_7_CGTGAGCGTGGTTTCA	14	naive.thymus.derived.CD8.positive..alpha.beta.T.cell
10X_P4_7_CGTGAGCTCAAGGTAA	11	marginal.zone.B.cell.of.spleen
10X_P4_7_CGTGTAAAGAAACCTA	11	marginal.zone.B.cell.of.spleen
10X_P4_7_CGTGTAAAGCGACGTA	11	marginal.zone.B.cell.of.spleen
10X_P4_7_CGTGTAAAGTATCGAA	14	naive.thymus.derived.CD8.positive..alpha.beta.T.cell
10X_P4_7_CGTGTAACAAGAGTCG	11	marginal.zone.B.cell.of.spleen
10X_P4_7_CGTGTAACACCAGGCT	11	marginal.zone.B.cell.of.spleen
10X_P4_7_CGTGTAAGTAAGGGAA	11	marginal.zone.B.cell.of.spleen
10X_P4_7_CGTGTAAGTACTTGAC	14	naive.thymus.derived.CD8.positive..alpha.beta.T.cell
10X_P4_7_CGTGTAAGTGCCTTGG	15	naive.thymus.derived.CD4.positive..alpha.beta.T.cell
10X_P4_7_CGTGTAAGTTCCAACA	11	marginal.zone.B.cell.of.spleen
10X_P4_7_CGTGTAATCAAACCAC	2	macrophage
10X_P4_7_CGTGTAATCGTTGCCT	11	marginal.zone.B.cell.of.spleen
10X_P4_7_CGTGTCTAGCGTTGCC	11	marginal.zone.B.cell.of.spleen
10X_P4_7_CGTGTCTAGGCGATAC	15	naive.thymus.derived.CD4.positive..alpha.beta.T.cell
10X_P4_7_CGTGTCTCATGGTCAT	11	marginal.zone.B.cell.of.spleen
10X_P4_7_CGTGTCTCATTCCTCG	11	marginal.zone.B.cell.of.spleen
10X_P4_7_CGTGTCTGTAGATTAG	11	marginal.zone.B.cell.of.spleen
10X_P4_7_CGTGTCTTCAGCTGGC	13	CD8.positive..alpha.beta.memory.T.cell
10X_P4_7_CGTGTCTTCCACGTGG	11	marginal.zone.B.cell.of.spleen
10X_P4_7_CGTTAGAAGCTCAACT	11	marginal.zone.B.cell.of.spleen
10X_P4_7_CGTTAGAAGGCTCAGA	11	marginal.zone.B.cell.of.spleen
10X_P4_7_CGTTAGAAGTACGTTC	11	marginal.zone.B.cell.of.spleen
10X_P4_7_CGTTAGAAGTCCATAC	11	marginal.zone.B.cell.of.spleen
10X_P4_7_CGTTAGAAGTTTGCGT	15	naive.thymus.derived.CD4.positive..alpha.beta.T.cell
10X_P4_7_CGTTAGACAGCTGTGC	13	CD8.positive..alpha.beta.memory.T.cell
10X_P4_7_CGTTAGAGTAAGTGTA	6	monocyte
10X_P4_7_CGTTAGATCAGCTTAG	11	marginal.zone.B.cell.of.spleen
10X_P4_7_CGTTAGATCCAGGGCT	12	activated.CD4.positive..alpha.beta.T.cell
10X_P4_7_CGTTAGATCGCGCCAA	11	marginal.zone.B.cell.of.spleen
10X_P4_7_CGTTCTGAGAGCCCAA	11	marginal.zone.B.cell.of.spleen
10X_P4_7_CGTTCTGTCCCTTGTG	11	marginal.zone.B.cell.of.spleen
10X_P4_7_CGTTGGGCAAATCCGT	11	marginal.zone.B.cell.of.spleen
10X_P4_7_CGTTGGGCACAGGCCT	11	marginal.zone.B.cell.of.spleen
10X_P4_7_CTAACTTAGTAGGTGC	11	marginal.zone.B.cell.of.spleen
10X_P4_7_CTAACTTAGTGCTGCC	11	marginal.zone.B.cell.of.spleen
10X_P4_7_CTAACTTCAAGTTAAG	14	naive.thymus.derived.CD8.positive..alpha.beta.T.cell
10X_P4_7_CTAACTTCACAGGAGT	11	marginal.zone.B.cell.of.spleen
10X_P4_7_CTAACTTCACCAACCG	11	marginal.zone.B.cell.of.spleen
10X_P4_7_CTAACTTCATTGTGCA	11	marginal.zone.B.cell.of.spleen
10X_P4_7_CTAACTTGTAGAAGGA	15	naive.thymus.derived.CD4.positive..alpha.beta.T.cell
10X_P4_7_CTAACTTGTCGACTGC	11	marginal.zone.B.cell.of.spleen
10X_P4_7_CTAACTTGTCGCGTGT	7	conventional.dendritic.cell
10X_P4_7_CTAACTTGTCGCTTCT	12	activated.CD4.positive..alpha.beta.T.cell
10X_P4_7_CTAACTTTCACGCATA	11	marginal.zone.B.cell.of.spleen
10X_P4_7_CTAACTTTCATTATCC	9	follicular.B.cell
10X_P4_7_CTAACTTTCCGATATG	11	marginal.zone.B.cell.of.spleen
10X_P4_7_CTAAGACCAATGGAAT	11	marginal.zone.B.cell.of.spleen
10X_P4_7_CTAAGACCACACAGAG	11	marginal.zone.B.cell.of.spleen
10X_P4_7_CTAAGACCATGTAGTC	9	follicular.B.cell
10X_P4_7_CTAAGACGTTCTGTTT	11	marginal.zone.B.cell.of.spleen
10X_P4_7_CTAAGACTCGTAGGTT	11	marginal.zone.B.cell.of.spleen
10X_P4_7_CTAAGACTCTGCTGTC	14	naive.thymus.derived.CD8.positive..alpha.beta.T.cell
10X_P4_7_CTAAGACTCTTGCATT	11	marginal.zone.B.cell.of.spleen
10X_P4_7_CTAATGGAGCACCGTC	11	marginal.zone.B.cell.of.spleen
10X_P4_7_CTAATGGAGCGATGAC	11	marginal.zone.B.cell.of.spleen
10X_P4_7_CTAATGGAGTTTGCGT	11	marginal.zone.B.cell.of.spleen
10X_P4_7_CTAATGGCACGTAAGG	11	marginal.zone.B.cell.of.spleen
10X_P4_7_CTAATGGCACTGAAGG	6	monocyte
10X_P4_7_CTAATGGCAGATGGCA	11	marginal.zone.B.cell.of.spleen
10X_P4_7_CTAATGGTCACAACGT	11	marginal.zone.B.cell.of.spleen
10X_P4_7_CTACACCAGTGAAGTT	11	marginal.zone.B.cell.of.spleen
10X_P4_7_CTACACCAGTGGCACA	11	marginal.zone.B.cell.of.spleen
10X_P4_7_CTACACCCATCCGGGT	11	marginal.zone.B.cell.of.spleen
10X_P4_7_CTACACCGTAGGAGTC	11	marginal.zone.B.cell.of.spleen
10X_P4_7_CTACACCGTTGTTTGG	11	marginal.zone.B.cell.of.spleen
10X_P4_7_CTACACCTCCCAACGG	11	marginal.zone.B.cell.of.spleen
10X_P4_7_CTACACCTCGCATGAT	11	marginal.zone.B.cell.of.spleen
10X_P4_7_CTACATTAGGACAGAA	11	marginal.zone.B.cell.of.spleen
10X_P4_7_CTACATTCACAACGCC	7	conventional.dendritic.cell
10X_P4_7_CTACATTCAGCCACCA	11	marginal.zone.B.cell.of.spleen
10X_P4_7_CTACATTCAGCCAGAA	9	follicular.B.cell
10X_P4_7_CTACATTCAGTCACTA	11	marginal.zone.B.cell.of.spleen
10X_P4_7_CTACATTGTGTAAGTA	11	marginal.zone.B.cell.of.spleen
10X_P4_7_CTACATTGTTGGTTTG	11	marginal.zone.B.cell.of.spleen
10X_P4_7_CTACATTTCGCCCTTA	8	natural.killer.cell
10X_P4_7_CTACCCAAGTTCGCGC	7	conventional.dendritic.cell
10X_P4_7_CTACCCACACCTTGTC	11	marginal.zone.B.cell.of.spleen
10X_P4_7_CTACCCACACGTAAGG	11	marginal.zone.B.cell.of.spleen
10X_P4_7_CTACCCACAGGTGCCT	11	marginal.zone.B.cell.of.spleen
10X_P4_7_CTACCCACATGAGCGA	11	marginal.zone.B.cell.of.spleen
10X_P4_7_CTACCCACATTACGAC	11	marginal.zone.B.cell.of.spleen
10X_P4_7_CTACCCAGTCGTTGTA	13	CD8.positive..alpha.beta.memory.T.cell
10X_P4_7_CTACCCAGTCTCGTTC	11	marginal.zone.B.cell.of.spleen
10X_P4_7_CTACCCATCCACGACG	11	marginal.zone.B.cell.of.spleen
10X_P4_7_CTACCCATCGGTCCGA	11	marginal.zone.B.cell.of.spleen
10X_P4_7_CTACGTCAGAAGGACA	11	marginal.zone.B.cell.of.spleen
10X_P4_7_CTACGTCAGCTGCAAG	11	marginal.zone.B.cell.of.spleen
10X_P4_7_CTACGTCAGGGATCTG	11	marginal.zone.B.cell.of.spleen
10X_P4_7_CTACGTCAGTGGGCTA	11	marginal.zone.B.cell.of.spleen
10X_P4_7_CTACGTCCAATGGTCT	11	marginal.zone.B.cell.of.spleen
10X_P4_7_CTACGTCCATCGACGC	11	marginal.zone.B.cell.of.spleen
10X_P4_7_CTACGTCGTAAAGTCA	11	marginal.zone.B.cell.of.spleen
10X_P4_7_CTACGTCTCGGCTACG	11	marginal.zone.B.cell.of.spleen
10X_P4_7_CTACGTCTCGGCTTGG	11	marginal.zone.B.cell.of.spleen
10X_P4_7_CTACGTCTCTGCGGCA	11	marginal.zone.B.cell.of.spleen
10X_P4_7_CTAGAGTAGCAGGCTA	11	marginal.zone.B.cell.of.spleen
10X_P4_7_CTAGAGTAGCTAGTGG	14	naive.thymus.derived.CD8.positive..alpha.beta.T.cell
10X_P4_7_CTAGAGTAGTTTCCTT	11	marginal.zone.B.cell.of.spleen
10X_P4_7_CTAGAGTCATGGTAGG	11	marginal.zone.B.cell.of.spleen
10X_P4_7_CTAGAGTGTTACTGAC	11	marginal.zone.B.cell.of.spleen
10X_P4_7_CTAGAGTTCGGAATCT	11	marginal.zone.B.cell.of.spleen
10X_P4_7_CTAGAGTTCTCTTGAT	11	marginal.zone.B.cell.of.spleen
10X_P4_7_CTAGCCTAGCTAAGAT	14	naive.thymus.derived.CD8.positive..alpha.beta.T.cell
10X_P4_7_CTAGCCTAGCTGCGAA	1	epithelial.cell
10X_P4_7_CTAGCCTAGGTGATAT	11	marginal.zone.B.cell.of.spleen
10X_P4_7_CTAGCCTGTAATCACC	11	marginal.zone.B.cell.of.spleen
10X_P4_7_CTAGCCTGTCACCTAA	11	marginal.zone.B.cell.of.spleen
10X_P4_7_CTAGCCTGTCTAGTCA	11	marginal.zone.B.cell.of.spleen
10X_P4_7_CTAGCCTGTGTATGGG	11	marginal.zone.B.cell.of.spleen
10X_P4_7_CTAGCCTTCGACGGAA	12	activated.CD4.positive..alpha.beta.T.cell
10X_P4_7_CTAGCCTTCGTACCGG	11	marginal.zone.B.cell.of.spleen
10X_P4_7_CTAGCCTTCTGGAGCC	11	marginal.zone.B.cell.of.spleen
10X_P4_7_CTAGCCTTCTTGTTTG	11	marginal.zone.B.cell.of.spleen
10X_P4_7_CTAGTGAAGGCTACGA	2	macrophage
10X_P4_7_CTAGTGACATACGCCG	11	marginal.zone.B.cell.of.spleen
10X_P4_7_CTAGTGAGTCAAAGCG	15	naive.thymus.derived.CD4.positive..alpha.beta.T.cell
10X_P4_7_CTAGTGAGTCGGCTCA	11	marginal.zone.B.cell.of.spleen
10X_P4_7_CTAGTGAGTCTCATCC	12	activated.CD4.positive..alpha.beta.T.cell
10X_P4_7_CTAGTGATCAAGATCC	11	marginal.zone.B.cell.of.spleen
10X_P4_7_CTAGTGATCAGATAAG	11	marginal.zone.B.cell.of.spleen
10X_P4_7_CTAGTGATCCCGACTT	11	marginal.zone.B.cell.of.spleen
10X_P4_7_CTCACACAGCGTTTAC	7	conventional.dendritic.cell
10X_P4_7_CTCACACCACCTTGTC	15	naive.thymus.derived.CD4.positive..alpha.beta.T.cell
10X_P4_7_CTCACACGTAATAGCA	13	CD8.positive..alpha.beta.memory.T.cell
10X_P4_7_CTCACACGTATGAATG	11	marginal.zone.B.cell.of.spleen
10X_P4_7_CTCACACGTCCGTGAC	13	CD8.positive..alpha.beta.memory.T.cell
10X_P4_7_CTCACACGTGGAAAGA	11	marginal.zone.B.cell.of.spleen
10X_P4_7_CTCAGAAAGAACAATC	8	natural.killer.cell
10X_P4_7_CTCAGAAAGAGGTACC	7	conventional.dendritic.cell
10X_P4_7_CTCAGAAAGGCTCTTA	11	marginal.zone.B.cell.of.spleen
10X_P4_7_CTCAGAACAAATACAG	11	marginal.zone.B.cell.of.spleen
10X_P4_7_CTCAGAACACAAGTAA	14	naive.thymus.derived.CD8.positive..alpha.beta.T.cell
10X_P4_7_CTCAGAACAGTCAGCC	12	activated.CD4.positive..alpha.beta.T.cell
10X_P4_7_CTCAGAAGTTTGGGCC	9	follicular.B.cell
10X_P4_7_CTCAGAATCGCGGATC	11	marginal.zone.B.cell.of.spleen
10X_P4_7_CTCATTAAGGATATAC	11	marginal.zone.B.cell.of.spleen
10X_P4_7_CTCATTAGTGAAAGAG	1	epithelial.cell
10X_P4_7_CTCATTATCAGAAATG	11	marginal.zone.B.cell.of.spleen
10X_P4_7_CTCCTAGAGCTAGTTC	15	naive.thymus.derived.CD4.positive..alpha.beta.T.cell
10X_P4_7_CTCCTAGAGGGAACGG	11	marginal.zone.B.cell.of.spleen
10X_P4_7_CTCCTAGAGTGGGCTA	12	activated.CD4.positive..alpha.beta.T.cell
10X_P4_7_CTCCTAGCAAGCTGGA	11	marginal.zone.B.cell.of.spleen
10X_P4_7_CTCCTAGCAGGTCTCG	12	activated.CD4.positive..alpha.beta.T.cell
10X_P4_7_CTCCTAGCATTTGCCC	11	marginal.zone.B.cell.of.spleen
10X_P4_7_CTCCTAGGTGCAACTT	11	marginal.zone.B.cell.of.spleen
10X_P4_7_CTCCTAGGTGCGAAAC	11	marginal.zone.B.cell.of.spleen
10X_P4_7_CTCCTAGTCGATGAGG	15	naive.thymus.derived.CD4.positive..alpha.beta.T.cell
10X_P4_7_CTCCTAGTCTGGTGTA	11	marginal.zone.B.cell.of.spleen
10X_P4_7_CTCCTAGTCTTGCATT	11	marginal.zone.B.cell.of.spleen
10X_P4_7_CTCCTAGTCTTGTCAT	11	marginal.zone.B.cell.of.spleen
10X_P4_7_CTCGAAAAGGGAGTAA	11	marginal.zone.B.cell.of.spleen
10X_P4_7_CTCGAAAAGTAGTGCG	11	marginal.zone.B.cell.of.spleen
10X_P4_7_CTCGAAACATGATCCA	14	naive.thymus.derived.CD8.positive..alpha.beta.T.cell
10X_P4_7_CTCGAGGCACCATGTA	4	T1.B.cell
10X_P4_7_CTCGAGGCATACCATG	11	marginal.zone.B.cell.of.spleen
10X_P4_7_CTCGAGGGTCGAACAG	11	marginal.zone.B.cell.of.spleen
10X_P4_7_CTCGAGGGTTGAACTC	11	marginal.zone.B.cell.of.spleen
10X_P4_7_CTCGAGGTCACAAACC	15	naive.thymus.derived.CD4.positive..alpha.beta.T.cell
10X_P4_7_CTCGGAGCAAGAAAGG	11	marginal.zone.B.cell.of.spleen
10X_P4_7_CTCGGAGCAGACGCTC	11	marginal.zone.B.cell.of.spleen
10X_P4_7_CTCGGAGCATCGACGC	11	marginal.zone.B.cell.of.spleen
10X_P4_7_CTCGGAGTCATCACCC	9	follicular.B.cell
10X_P4_7_CTCGGAGTCCGCAAGC	11	marginal.zone.B.cell.of.spleen
10X_P4_7_CTCGGAGTCCGCAGTG	11	marginal.zone.B.cell.of.spleen
10X_P4_7_CTCGGAGTCGCTTAGA	11	marginal.zone.B.cell.of.spleen
10X_P4_7_CTCGGGAAGAACTCGG	5	mesenchymal.stem.cell
10X_P4_7_CTCGGGAAGCTTTGGT	11	marginal.zone.B.cell.of.spleen
10X_P4_7_CTCGGGACAAGCTGGA	11	marginal.zone.B.cell.of.spleen
10X_P4_7_CTCGGGACACGGTGTC	14	naive.thymus.derived.CD8.positive..alpha.beta.T.cell
10X_P4_7_CTCGGGACACTTACGA	5	mesenchymal.stem.cell
10X_P4_7_CTCGGGAGTACATCCA	11	marginal.zone.B.cell.of.spleen
10X_P4_7_CTCGGGAGTCATATGC	11	marginal.zone.B.cell.of.spleen
10X_P4_7_CTCGGGATCCAGTAGT	11	marginal.zone.B.cell.of.spleen
10X_P4_7_CTCGTACAGCTAGTTC	2	macrophage
10X_P4_7_CTCGTACCATATGGTC	11	marginal.zone.B.cell.of.spleen
10X_P4_7_CTCGTACCATGCAACT	11	marginal.zone.B.cell.of.spleen
10X_P4_7_CTCGTACGTGAACCTT	11	marginal.zone.B.cell.of.spleen
10X_P4_7_CTCGTACGTGCAGACA	2	macrophage
10X_P4_7_CTCGTACGTTGTGGCC	11	marginal.zone.B.cell.of.spleen
10X_P4_7_CTCGTCAAGAAGGGTA	11	marginal.zone.B.cell.of.spleen
10X_P4_7_CTCGTCACACGGTTTA	15	naive.thymus.derived.CD4.positive..alpha.beta.T.cell
10X_P4_7_CTCGTCACATCGGGTC	11	marginal.zone.B.cell.of.spleen
10X_P4_7_CTCGTCACATGCCACG	11	marginal.zone.B.cell.of.spleen
10X_P4_7_CTCGTCAGTGCATCTA	2	macrophage
10X_P4_7_CTCGTCAGTGCCTTGG	11	marginal.zone.B.cell.of.spleen
10X_P4_7_CTCGTCATCCATGAAC	9	follicular.B.cell
10X_P4_7_CTCGTCATCTTGTTTG	14	naive.thymus.derived.CD8.positive..alpha.beta.T.cell
10X_P4_7_CTCTAATAGAGCTTCT	11	marginal.zone.B.cell.of.spleen
10X_P4_7_CTCTAATAGCTGAACG	11	marginal.zone.B.cell.of.spleen
10X_P4_7_CTCTAATCAATTGCTG	11	marginal.zone.B.cell.of.spleen
10X_P4_7_CTCTAATCACATTCGA	6	monocyte
10X_P4_7_CTCTACGCAAGAGTCG	14	naive.thymus.derived.CD8.positive..alpha.beta.T.cell
10X_P4_7_CTCTACGCATCGGTTA	14	naive.thymus.derived.CD8.positive..alpha.beta.T.cell
10X_P4_7_CTCTACGGTAAGAGGA	11	marginal.zone.B.cell.of.spleen
10X_P4_7_CTCTACGGTACCAGTT	11	marginal.zone.B.cell.of.spleen
10X_P4_7_CTCTACGGTGATAAAC	2	macrophage
10X_P4_7_CTCTACGTCGGAGGTA	11	marginal.zone.B.cell.of.spleen
10X_P4_7_CTCTGGTCAACTGCTA	11	marginal.zone.B.cell.of.spleen
10X_P4_7_CTCTGGTCATGGGACA	12	activated.CD4.positive..alpha.beta.T.cell
10X_P4_7_CTCTGGTGTATAGGGC	11	marginal.zone.B.cell.of.spleen
10X_P4_7_CTCTGGTGTTAAAGAC	11	marginal.zone.B.cell.of.spleen
10X_P4_7_CTCTGGTTCCTTTCTC	14	naive.thymus.derived.CD8.positive..alpha.beta.T.cell
10X_P4_7_CTCTGGTTCTGCCCTA	14	naive.thymus.derived.CD8.positive..alpha.beta.T.cell
10X_P4_7_CTGAAACAGGGAGTAA	11	marginal.zone.B.cell.of.spleen
10X_P4_7_CTGAAACCACTGAAGG	11	marginal.zone.B.cell.of.spleen
10X_P4_7_CTGAAACCATGCAACT	13	CD8.positive..alpha.beta.memory.T.cell
10X_P4_7_CTGAAACGTAAGAGGA	14	naive.thymus.derived.CD8.positive..alpha.beta.T.cell
10X_P4_7_CTGAAACTCGATAGAA	12	activated.CD4.positive..alpha.beta.T.cell
10X_P4_7_CTGAAGTAGAGCCTAG	8	natural.killer.cell
10X_P4_7_CTGAAGTAGCTCCTCT	10	mature.NK.T.cell
10X_P4_7_CTGAAGTCACATTAGC	11	marginal.zone.B.cell.of.spleen
10X_P4_7_CTGAAGTCAGATGGCA	11	marginal.zone.B.cell.of.spleen
10X_P4_7_CTGAAGTCAGTCAGCC	11	marginal.zone.B.cell.of.spleen
10X_P4_7_CTGAAGTCATTAGGCT	11	marginal.zone.B.cell.of.spleen
10X_P4_7_CTGAAGTGTCTCTTAT	11	marginal.zone.B.cell.of.spleen
10X_P4_7_CTGAAGTTCCTACAGA	11	marginal.zone.B.cell.of.spleen
10X_P4_7_CTGAAGTTCGCCAAAT	11	marginal.zone.B.cell.of.spleen
10X_P4_7_CTGAAGTTCTTATCTG	2	macrophage
10X_P4_7_CTGATAGAGCACAGGT	6	monocyte
10X_P4_7_CTGATAGAGTCCAGGA	5	mesenchymal.stem.cell
10X_P4_7_CTGATAGCAATAGCGG	11	marginal.zone.B.cell.of.spleen
10X_P4_7_CTGATAGGTCTCGTTC	11	marginal.zone.B.cell.of.spleen
10X_P4_7_CTGATAGTCCTTCAAT	11	marginal.zone.B.cell.of.spleen
10X_P4_7_CTGATCCAGCGTTTAC	14	naive.thymus.derived.CD8.positive..alpha.beta.T.cell
10X_P4_7_CTGATCCCACAGATTC	10	mature.NK.T.cell
10X_P4_7_CTGATCCGTCTAGTCA	11	marginal.zone.B.cell.of.spleen
10X_P4_7_CTGATCCGTGAAATCA	11	marginal.zone.B.cell.of.spleen
10X_P4_7_CTGATCCGTGTATGGG	11	marginal.zone.B.cell.of.spleen
10X_P4_7_CTGATCCTCAGAAATG	11	marginal.zone.B.cell.of.spleen
10X_P4_7_CTGATCCTCGCAGGCT	6	monocyte
10X_P4_7_CTGCCTAAGACTTGAA	11	marginal.zone.B.cell.of.spleen
10X_P4_7_CTGCCTAAGCTTTGGT	11	marginal.zone.B.cell.of.spleen
10X_P4_7_CTGCCTAAGGATATAC	11	marginal.zone.B.cell.of.spleen
10X_P4_7_CTGCCTAAGGTCATCT	11	marginal.zone.B.cell.of.spleen
10X_P4_7_CTGCCTAAGTGGAGAA	11	marginal.zone.B.cell.of.spleen
10X_P4_7_CTGCCTAGTAAGAGGA	11	marginal.zone.B.cell.of.spleen
10X_P4_7_CTGCCTAGTTGTCTTT	11	marginal.zone.B.cell.of.spleen
10X_P4_7_CTGCCTATCGGATGTT	11	marginal.zone.B.cell.of.spleen
10X_P4_7_CTGCCTATCGGCATCG	11	marginal.zone.B.cell.of.spleen
10X_P4_7_CTGCGGACACAGCCCA	11	marginal.zone.B.cell.of.spleen
10X_P4_7_CTGCGGACACCAGCAC	11	marginal.zone.B.cell.of.spleen
10X_P4_7_CTGCGGAGTACCTACA	11	marginal.zone.B.cell.of.spleen
10X_P4_7_CTGCGGAGTACTCTCC	15	naive.thymus.derived.CD4.positive..alpha.beta.T.cell
10X_P4_7_CTGCGGAGTATGCTTG	1	epithelial.cell
10X_P4_7_CTGCGGATCAAGGCTT	11	marginal.zone.B.cell.of.spleen
10X_P4_7_CTGCGGATCCAAGCCG	11	marginal.zone.B.cell.of.spleen
10X_P4_7_CTGCGGATCTGCCAGG	11	marginal.zone.B.cell.of.spleen
10X_P4_7_CTGCTGTAGCTCAACT	12	activated.CD4.positive..alpha.beta.T.cell
10X_P4_7_CTGCTGTAGCTCCTTC	11	marginal.zone.B.cell.of.spleen
10X_P4_7_CTGCTGTCAAACTGTC	11	marginal.zone.B.cell.of.spleen
10X_P4_7_CTGCTGTCAATCGGTT	11	marginal.zone.B.cell.of.spleen
10X_P4_7_CTGCTGTCAGGGATTG	11	marginal.zone.B.cell.of.spleen
10X_P4_7_CTGCTGTCATCCCACT	14	naive.thymus.derived.CD8.positive..alpha.beta.T.cell
10X_P4_7_CTGCTGTGTCTCAACA	15	naive.thymus.derived.CD4.positive..alpha.beta.T.cell
10X_P4_7_CTGCTGTGTTGTGGAG	11	marginal.zone.B.cell.of.spleen
10X_P4_7_CTGCTGTGTTGTTTGG	8	natural.killer.cell
10X_P4_7_CTGCTGTTCATCTGCC	9	follicular.B.cell
10X_P4_7_CTGCTGTTCCTTGGTC	11	marginal.zone.B.cell.of.spleen
10X_P4_7_CTGCTGTTCGTTACGA	1	epithelial.cell
10X_P4_7_CTGGTCTAGAGATGAG	11	marginal.zone.B.cell.of.spleen
10X_P4_7_CTGGTCTAGCTAACAA	11	marginal.zone.B.cell.of.spleen
10X_P4_7_CTGGTCTAGTCCATAC	14	naive.thymus.derived.CD8.positive..alpha.beta.T.cell
10X_P4_7_CTGGTCTAGTTCGATC	11	marginal.zone.B.cell.of.spleen
10X_P4_7_CTGGTCTCACACGCTG	9	follicular.B.cell
10X_P4_7_CTGGTCTCACAGACTT	11	marginal.zone.B.cell.of.spleen
10X_P4_7_CTGGTCTCACTTCGAA	11	marginal.zone.B.cell.of.spleen
10X_P4_7_CTGGTCTCAGGTCGTC	11	marginal.zone.B.cell.of.spleen
10X_P4_7_CTGGTCTTCAGTACGT	11	marginal.zone.B.cell.of.spleen
10X_P4_7_CTGGTCTTCCATTCTA	11	marginal.zone.B.cell.of.spleen
10X_P4_7_CTGGTCTTCGGAAATA	11	marginal.zone.B.cell.of.spleen
10X_P4_7_CTGTGCTAGAATCTCC	11	marginal.zone.B.cell.of.spleen
10X_P4_7_CTGTGCTAGCCACTAT	11	marginal.zone.B.cell.of.spleen
10X_P4_7_CTGTGCTAGTGGTAGC	11	marginal.zone.B.cell.of.spleen
10X_P4_7_CTGTGCTCACCTCGTT	11	marginal.zone.B.cell.of.spleen
10X_P4_7_CTGTGCTGTCCAAGTT	12	activated.CD4.positive..alpha.beta.T.cell
10X_P4_7_CTGTGCTGTCGGATCC	15	naive.thymus.derived.CD4.positive..alpha.beta.T.cell
10X_P4_7_CTGTGCTGTGTCGCTG	11	marginal.zone.B.cell.of.spleen
10X_P4_7_CTGTTTAAGAAACCGC	11	marginal.zone.B.cell.of.spleen
10X_P4_7_CTGTTTAAGGAGTCTG	5	mesenchymal.stem.cell
10X_P4_7_CTGTTTAAGTAATCCC	11	marginal.zone.B.cell.of.spleen
10X_P4_7_CTGTTTAAGTCCATAC	11	marginal.zone.B.cell.of.spleen
10X_P4_7_CTGTTTAAGTGGTAGC	11	marginal.zone.B.cell.of.spleen
10X_P4_7_CTGTTTACAAGCCGCT	11	marginal.zone.B.cell.of.spleen
10X_P4_7_CTGTTTAGTATCAGTC	2	macrophage
10X_P4_7_CTGTTTAGTTCCACAA	3	plasmacytoid.dendritic.cell
10X_P4_7_CTGTTTATCAACGGGA	14	naive.thymus.derived.CD8.positive..alpha.beta.T.cell
10X_P4_7_CTGTTTATCTACTCAT	11	marginal.zone.B.cell.of.spleen
10X_P4_7_CTTAACTAGGTGTGGT	14	naive.thymus.derived.CD8.positive..alpha.beta.T.cell
10X_P4_7_CTTAACTAGTGTCCAT	11	marginal.zone.B.cell.of.spleen
10X_P4_7_CTTAACTCATGCCCGA	11	marginal.zone.B.cell.of.spleen
10X_P4_7_CTTAACTGTAAGTTCC	11	marginal.zone.B.cell.of.spleen
10X_P4_7_CTTACCGAGAAGGCCT	11	marginal.zone.B.cell.of.spleen
10X_P4_7_CTTACCGAGCCAGTTT	11	marginal.zone.B.cell.of.spleen
10X_P4_7_CTTACCGAGGTAAACT	11	marginal.zone.B.cell.of.spleen
10X_P4_7_CTTACCGCAAGTCTAC	11	marginal.zone.B.cell.of.spleen
10X_P4_7_CTTACCGCACCCATTC	11	marginal.zone.B.cell.of.spleen
10X_P4_7_CTTACCGGTCACTTCC	11	marginal.zone.B.cell.of.spleen
10X_P4_7_CTTACCGTCGTGGTCG	11	marginal.zone.B.cell.of.spleen
10X_P4_7_CTTACCGTCTGAGGGA	12	activated.CD4.positive..alpha.beta.T.cell
10X_P4_7_CTTAGGAAGTCAAGCG	11	marginal.zone.B.cell.of.spleen
10X_P4_7_CTTAGGAAGTGGAGAA	11	marginal.zone.B.cell.of.spleen
10X_P4_7_CTTAGGAAGTGTTAGA	11	marginal.zone.B.cell.of.spleen
10X_P4_7_CTTAGGACACATAACC	11	marginal.zone.B.cell.of.spleen
10X_P4_7_CTTAGGAGTAGCGATG	11	marginal.zone.B.cell.of.spleen
10X_P4_7_CTTAGGAGTAGGCTGA	14	naive.thymus.derived.CD8.positive..alpha.beta.T.cell
10X_P4_7_CTTAGGAGTATATCCG	11	marginal.zone.B.cell.of.spleen
10X_P4_7_CTTAGGAGTTCTGTTT	11	marginal.zone.B.cell.of.spleen
10X_P4_7_CTTAGGATCGTCCGTT	11	marginal.zone.B.cell.of.spleen
10X_P4_7_CTTCTCTCAAAGTGCG	11	marginal.zone.B.cell.of.spleen
10X_P4_7_CTTCTCTCAAGGTTCT	5	mesenchymal.stem.cell
10X_P4_7_CTTCTCTCAAGTTAAG	15	naive.thymus.derived.CD4.positive..alpha.beta.T.cell
10X_P4_7_CTTCTCTCACCGATAT	11	marginal.zone.B.cell.of.spleen
10X_P4_7_CTTCTCTCAGCTATTG	13	CD8.positive..alpha.beta.memory.T.cell
10X_P4_7_CTTCTCTGTAAGTAGT	11	marginal.zone.B.cell.of.spleen
10X_P4_7_CTTCTCTGTACCGCTG	11	marginal.zone.B.cell.of.spleen
10X_P4_7_CTTCTCTGTGACGCCT	11	marginal.zone.B.cell.of.spleen
10X_P4_7_CTTCTCTTCCCTTGTG	11	marginal.zone.B.cell.of.spleen
10X_P4_7_CTTCTCTTCCTTGCCA	11	marginal.zone.B.cell.of.spleen
10X_P4_7_CTTCTCTTCGGCATCG	11	marginal.zone.B.cell.of.spleen
10X_P4_7_CTTCTCTTCTCTAGGA	11	marginal.zone.B.cell.of.spleen
10X_P4_7_CTTGGCTAGCGCCTTG	11	marginal.zone.B.cell.of.spleen
10X_P4_7_CTTGGCTCACGAAACG	1	epithelial.cell
10X_P4_7_CTTGGCTTCGTTTGCC	11	marginal.zone.B.cell.of.spleen
10X_P4_7_CTTTGCGAGATGAGAG	10	mature.NK.T.cell
10X_P4_7_CTTTGCGAGATGGGTC	11	marginal.zone.B.cell.of.spleen
10X_P4_7_CTTTGCGAGCCCAATT	11	marginal.zone.B.cell.of.spleen
10X_P4_7_CTTTGCGAGGTCATCT	14	naive.thymus.derived.CD8.positive..alpha.beta.T.cell
10X_P4_7_CTTTGCGCAGCCTGTG	14	naive.thymus.derived.CD8.positive..alpha.beta.T.cell
10X_P4_7_CTTTGCGGTAATCACC	14	naive.thymus.derived.CD8.positive..alpha.beta.T.cell
10X_P4_7_CTTTGCGGTACGAAAT	9	follicular.B.cell
10X_P4_7_CTTTGCGGTTGTTTGG	11	marginal.zone.B.cell.of.spleen
10X_P4_7_CTTTGCGGTTTAAGCC	8	natural.killer.cell
10X_P4_7_CTTTGCGTCTCGGACG	2	macrophage
10X_P4_7_GAAACTCAGCCACTAT	11	marginal.zone.B.cell.of.spleen
10X_P4_7_GAAACTCAGGGAGTAA	11	marginal.zone.B.cell.of.spleen
10X_P4_7_GAAACTCCAAGCCGCT	14	naive.thymus.derived.CD8.positive..alpha.beta.T.cell
10X_P4_7_GAAACTCCACCAACCG	11	marginal.zone.B.cell.of.spleen
10X_P4_7_GAAACTCGTGTGACGA	11	marginal.zone.B.cell.of.spleen
10X_P4_7_GAAACTCTCGCGCCAA	12	activated.CD4.positive..alpha.beta.T.cell
10X_P4_7_GAAATGAAGACAGAGA	2	macrophage
10X_P4_7_GAAATGAAGAGGGATA	5	mesenchymal.stem.cell
10X_P4_7_GAAATGAAGTTTCCTT	11	marginal.zone.B.cell.of.spleen
10X_P4_7_GAAATGACACCAACCG	11	marginal.zone.B.cell.of.spleen
10X_P4_7_GAAATGACACTAAGTC	11	marginal.zone.B.cell.of.spleen
10X_P4_7_GAAATGACACTCGACG	11	marginal.zone.B.cell.of.spleen
10X_P4_7_GAAATGACATCGATTG	11	marginal.zone.B.cell.of.spleen
10X_P4_7_GAAATGAGTAACGTTC	11	marginal.zone.B.cell.of.spleen
10X_P4_7_GAAATGAGTCCCTTGT	11	marginal.zone.B.cell.of.spleen
10X_P4_7_GAAATGAGTCCGCTGA	12	activated.CD4.positive..alpha.beta.T.cell
10X_P4_7_GAAATGAGTGACTACT	11	marginal.zone.B.cell.of.spleen
10X_P4_7_GAAATGAGTTCTGGTA	11	marginal.zone.B.cell.of.spleen
10X_P4_7_GAACATCAGAGCAATT	11	marginal.zone.B.cell.of.spleen
10X_P4_7_GAACATCCAGTGGGAT	14	naive.thymus.derived.CD8.positive..alpha.beta.T.cell
10X_P4_7_GAACATCCATATGAGA	11	marginal.zone.B.cell.of.spleen
10X_P4_7_GAACATCCATGGTCAT	11	marginal.zone.B.cell.of.spleen
10X_P4_7_GAACATCGTAGAGCTG	14	naive.thymus.derived.CD8.positive..alpha.beta.T.cell
10X_P4_7_GAACATCGTCGAATCT	11	marginal.zone.B.cell.of.spleen
10X_P4_7_GAACATCTCCAGGGCT	11	marginal.zone.B.cell.of.spleen
10X_P4_7_GAACCTAAGATGTGGC	11	marginal.zone.B.cell.of.spleen
10X_P4_7_GAACCTAAGGAGCGTT	11	marginal.zone.B.cell.of.spleen
10X_P4_7_GAACCTAAGTATGACA	9	follicular.B.cell
10X_P4_7_GAACCTACAGTGAGTG	11	marginal.zone.B.cell.of.spleen
10X_P4_7_GAACCTACATCATCCC	11	marginal.zone.B.cell.of.spleen
10X_P4_7_GAACCTACATTAGGCT	1	epithelial.cell
10X_P4_7_GAACCTAGTCTGCAAT	9	follicular.B.cell
10X_P4_7_GAACCTAGTTCAGCGC	11	marginal.zone.B.cell.of.spleen
10X_P4_7_GAACCTATCTATCCTA	9	follicular.B.cell
10X_P4_7_GAACCTATCTTTCCTC	11	marginal.zone.B.cell.of.spleen
10X_P4_7_GAACGGAAGGATGGAA	11	marginal.zone.B.cell.of.spleen
10X_P4_7_GAACGGACACCTGGTG	15	naive.thymus.derived.CD4.positive..alpha.beta.T.cell
10X_P4_7_GAACGGACACGAAACG	11	marginal.zone.B.cell.of.spleen
10X_P4_7_GAACGGACATCACGTA	11	marginal.zone.B.cell.of.spleen
10X_P4_7_GAACGGATCATCGATG	15	naive.thymus.derived.CD4.positive..alpha.beta.T.cell
10X_P4_7_GAACGGATCGCCTGTT	11	marginal.zone.B.cell.of.spleen
10X_P4_7_GAAGCAGAGCCCGAAA	11	marginal.zone.B.cell.of.spleen
10X_P4_7_GAAGCAGCAAGTCTGT	11	marginal.zone.B.cell.of.spleen
10X_P4_7_GAAGCAGCATCGGAAG	11	marginal.zone.B.cell.of.spleen
10X_P4_7_GAAGCAGGTTCCATGA	8	natural.killer.cell
10X_P4_7_GAAGCAGTCCTTGCCA	11	marginal.zone.B.cell.of.spleen
10X_P4_7_GAATAAGAGGGCTTGA	11	marginal.zone.B.cell.of.spleen
10X_P4_7_GAATAAGCAGTAACGG	11	marginal.zone.B.cell.of.spleen
10X_P4_7_GAATAAGCATATACCG	11	marginal.zone.B.cell.of.spleen
10X_P4_7_GAATAAGTCTGTCTAT	11	marginal.zone.B.cell.of.spleen
10X_P4_7_GAATGAAGTGTGAATA	11	marginal.zone.B.cell.of.spleen
10X_P4_7_GAATGAATCATAAAGG	14	naive.thymus.derived.CD8.positive..alpha.beta.T.cell
10X_P4_7_GACACGCCACCCATGG	11	marginal.zone.B.cell.of.spleen
10X_P4_7_GACACGCGTACCGTTA	13	CD8.positive..alpha.beta.memory.T.cell
10X_P4_7_GACACGCGTAGCAAAT	11	marginal.zone.B.cell.of.spleen
10X_P4_7_GACACGCGTTATGTGC	11	marginal.zone.B.cell.of.spleen
10X_P4_7_GACACGCTCATAGCAC	14	naive.thymus.derived.CD8.positive..alpha.beta.T.cell
10X_P4_7_GACACGCTCTTGTACT	11	marginal.zone.B.cell.of.spleen
10X_P4_7_GACAGAGAGAGTAATC	13	CD8.positive..alpha.beta.memory.T.cell
10X_P4_7_GACAGAGCAGGGATTG	11	marginal.zone.B.cell.of.spleen
10X_P4_7_GACAGAGCAGTAGAGC	11	marginal.zone.B.cell.of.spleen
10X_P4_7_GACAGAGTCAGATAAG	11	marginal.zone.B.cell.of.spleen
10X_P4_7_GACAGAGTCGCTTAGA	14	naive.thymus.derived.CD8.positive..alpha.beta.T.cell
10X_P4_7_GACAGAGTCGTTTAGG	11	marginal.zone.B.cell.of.spleen
10X_P4_7_GACAGAGTCTCAAGTG	6	monocyte
[truncated: 7,667 more rows]

## Sheet: Tongue
Supplementary File 4F. Mouse cell clusters annotations in tongue.
[truncated: 7,539 more rows]

[truncated: 1 more sheets: Trachea]
