# Supplementary material for: Affected cell types for hundreds of Mendelian diseases revealed by analysis of human and mouse single-cell data
Source: eLife. 2024 Jan 10;13:e84613. doi: 10.7554/eLife.84613 (PMC10830129; doi:10.7554/eLife.84613)
Supplement: Supplementary file 5. [file elife-84613-supp5.xlsx]

## Sheet: Supplementary File 5
Supplementary File 5. Matching cell types between human and mouse tissues.
Data per tissue appear in distinct tabs, as follows: 5A Bone marrow, 5B Lung, 5C Skeletal muscle, 5D Spleen, 5E Tongue, and 5F Trachea.

## Sheet: Bone marrow
Supplementary File 5A. Matching cell types between human and mouse in bone marrow.
Human cell type	Mouse cell type	matchSCore2 score	Matching cell types (1=Yes, 0=No)
erythrocyte	erythroblast	0.195373	1
erythrocyte	proerythroblast	0.106936	1
erythroid.progenitor	proerythroblast	0.103751	1
granulocyte	immature.B.cell	0.103041	1
plasma.cell	plasma.cell	0.0971302	1
nampt.neutrophil	segmented.neutrophil.of.bone.marrow	0.0894942	1
neutrophil	segmented.neutrophil.of.bone.marrow	0.0872939	1
naive.b.cell	mature.B.cell	0.0846485	1
memory.b.cell	mature.B.cell	0.0822281	1
cd8.positive..alpha.beta.t.cell	T.cell	0.0818815	1
macrophage	monocyte	0.0655738	1
erythroid.progenitor	immature.B.cell	0.0643166	1
nk.cell	T.cell	0.0642994	1
erythroid.progenitor	precursor.B.cell	0.0631579	1
cd24.neutrophil	band.form.neutrophil	0.0626703	1
cd4.positive..alpha.beta.t.cell	T.cell	0.0608899	1
monocyte	monocyte	0.0558882	1
cd24.neutrophil	segmented.neutrophil.of.bone.marrow	0.0537057	1
granulocyte	proerythroblast	0.0521739	1
erythrocyte	reticulocyte	0.0511464	1
myeloid.progenitor	precursor.B.cell	0.0508671	1
myeloid.progenitor	hematopoietic.stem.cell	0.0444939	0
nampt.neutrophil	monocyte	0.0444856	0
nk.cell	early.pro.B.cell	0.0417381	0
macrophage	neutrophilic.myeloblast	0.0409556	0
hematopoietic.stem.cell	hematopoietic.stem.cell	0.0409277	0
myeloid.progenitor	immature.B.cell	0.0358056	0
neutrophil	band.form.neutrophil	0.0348706	0
nampt.neutrophil	basophil	0.0333041	0
granulocyte	neutrophilic.myeloblast	0.0328185	0
cd24.neutrophil	macrophage	0.0325792	0
naive.b.cell	macrophage	0.0321951	0
naive.b.cell	early.pro.B.cell	0.03215	0
nk.cell	immature.B.cell	0.0317552	0
cd24.neutrophil	neutrophilic.metamyelocyte	0.0317003	0
neutrophil	basophil	0.0314685	0
myeloid.progenitor	proerythroblast	0.0297189	0
macrophage	macrophage	0.0286659	0
nk.cell	macrophage	0.0268405	0
nk.cell	plasma.cell	0.0266753	0
granulocyte	myelocyte	0.0266667	0
neutrophil	early.pro.B.cell	0.0255814	0
neutrophil	monocyte	0.0254545	0
nampt.neutrophil	early.pro.B.cell	0.025	0
erythroid.progenitor	erythroblast	0.0246479	0
nampt.neutrophil	plasma.cell	0.0242751	0
nampt.neutrophil	macrophage	0.024	0
nk.cell	basophil	0.0239868	0
neutrophil	macrophage	0.0239808	0
cd8.positive..alpha.beta.t.cell	early.pro.B.cell	0.0237913	0
monocyte	neutrophilic.myeloblast	0.022792	0
macrophage	plasma.cell	0.0226876	0
nampt.neutrophil	erythroblast	0.021815	0
monocyte	conventional.dendritic.cell	0.0217391	0
cd24.neutrophil	basophil	0.021611	0
erythroid.progenitor	hematopoietic.stem.cell	0.021611	0
hematopoietic.stem.cell	macrophage	0.0215385	0
cd24.neutrophil	early.pro.B.cell	0.0213836	0
nampt.neutrophil	band.form.neutrophil	0.0211111	0
myeloid.progenitor	basophil	0.0209724	0
neutrophil	immature.B.cell	0.0206612	0
naive.b.cell	plasma.cell	0.0204563	0
myeloid.progenitor	early.pro.B.cell	0.0203453	0
myeloid.progenitor	plasma.cell	0.0202458	0
erythrocyte	early.pro.B.cell	0.0201072	0
cd24.neutrophil	erythroblast	0.0197628	0
nk.cell	proerythroblast	0.0197044	0
naive.b.cell	immature.B.cell	0.0196344	0
hematopoietic.stem.cell	basophil	0.0193622	0
erythroid.progenitor	myelocyte	0.0192308	0
monocyte	band.form.neutrophil	0.0190476	0
neutrophil	plasma.cell	0.0187668	0
erythroid.progenitor	early.pro.B.cell	0.0185615	0
erythrocyte	immature.B.cell	0.0184932	0
cd4.positive..alpha.beta.t.cell	early.pro.B.cell	0.0183406	0
nk.cell	monocyte	0.0180258	0
macrophage	early.pro.B.cell	0.0179727	0
cd8.positive..alpha.beta.t.cell	plasma.cell	0.0177404	0
monocyte	segmented.neutrophil.of.bone.marrow	0.0175439	0
hematopoietic.stem.cell	early.pro.B.cell	0.0171939	0
memory.b.cell	macrophage	0.017192	0
macrophage	segmented.neutrophil.of.bone.marrow	0.0171053	0
granulocyte	precursor.B.cell	0.017094	0
cd24.neutrophil	plasma.cell	0.0169492	0
hematopoietic.stem.cell	myelocyte	0.0165165	0
macrophage	conventional.dendritic.cell	0.0162075	0
erythroid.progenitor	plasma.cell	0.016129	0
cd24.neutrophil	myelocyte	0.0160692	0
neutrophil	erythroblast	0.0155979	0
myeloid.progenitor	macrophage	0.0155979	0
cd24.neutrophil	proerythroblast	0.0154221	0
cd24.neutrophil	immature.B.cell	0.0153355	0
memory.b.cell	early.pro.B.cell	0.0153191	0
nampt.neutrophil	immature.B.cell	0.0152761	0
nk.cell	erythroblast	0.0148515	0
naive.b.cell	conventional.dendritic.cell	0.0148448	0
macrophage	basophil	0.0146341	0
nampt.neutrophil	mature.B.cell	0.0145228	0
erythrocyte	plasma.cell	0.0142857	0
memory.b.cell	immature.B.cell	0.0140105	0
hematopoietic.stem.cell	plasma.cell	0.0139573	0
cd24.neutrophil	neutrophilic.myeloblast	0.0136307	0
naive.b.cell	monocyte	0.0134378	0
monocyte	macrophage	0.013373	0
monocyte	promyelocyte	0.0131579	0
cd8.positive..alpha.beta.t.cell	macrophage	0.0130952	0
cd8.positive..alpha.beta.t.cell	mature.B.cell	0.0129151	0
nk.cell	conventional.dendritic.cell	0.0127451	0
erythrocyte	macrophage	0.0126706	0
macrophage	promyelocyte	0.012605	0
memory.b.cell	conventional.dendritic.cell	0.0125313	0
cd24.neutrophil	monocyte	0.0122951	0
monocyte	basophil	0.0121951	0
cd8.positive..alpha.beta.t.cell	basophil	0.0121457	0
cd24.neutrophil	conventional.dendritic.cell	0.0121212	0
nk.cell	hematopoietic.stem.cell	0.0118939	0
hematopoietic.stem.cell	conventional.dendritic.cell	0.0117302	0
neutrophil	proerythroblast	0.0116364	0
naive.b.cell	basophil	0.0116279	0
nampt.neutrophil	T.cell	0.0115607	0
cd4.positive..alpha.beta.t.cell	monocyte	0.0114504	0
nampt.neutrophil	conventional.dendritic.cell	0.0114226	0
neutrophil	conventional.dendritic.cell	0.0114108	0
erythrocyte	hematopoietic.stem.cell	0.0112923	0
nk.cell	precursor.B.cell	0.0112782	0
naive.b.cell	proerythroblast	0.0112554	0
cd8.positive..alpha.beta.t.cell	conventional.dendritic.cell	0.0111317	0
nampt.neutrophil	proerythroblast	0.0109091	0
memory.b.cell	monocyte	0.0108893	0
cd24.neutrophil	mature.B.cell	0.0108434	0
myeloid.progenitor	T.cell	0.0107296	0
nk.cell	mature.B.cell	0.0107212	0
erythroid.progenitor	neutrophilic.myeloblast	0.0106383	0
neutrophil	neutrophilic.metamyelocyte	0.0106257	0
cd4.positive..alpha.beta.t.cell	basophil	0.0104167	0
monocyte	early.pro.B.cell	0.0104076	0
neutrophil	mature.B.cell	0.0103199	0
naive.b.cell	segmented.neutrophil.of.bone.marrow	0.0101237	0
cd8.positive..alpha.beta.t.cell	immature.B.cell	0.0101089	0
macrophage	myelocyte	0.00986842	0
macrophage	proerythroblast	0.00968054	0
erythroid.progenitor	macrophage	0.00951626	0
myeloid.progenitor	neutrophilic.myeloblast	0.00951249	0
neutrophil	neutrophilic.myeloblast	0.00948367	0
erythroid.progenitor	basophil	0.00947459	0
cd8.positive..alpha.beta.t.cell	proerythroblast	0.00945378	0
nampt.neutrophil	neutrophilic.metamyelocyte	0.0094451	0
granulocyte	conventional.dendritic.cell	0.00914077	0
nk.cell	myelocyte	0.00890208	0
cd4.positive..alpha.beta.t.cell	macrophage	0.00886263	0
cd4.positive..alpha.beta.t.cell	plasma.cell	0.00875274	0
cd8.positive..alpha.beta.t.cell	monocyte	0.00867052	0
macrophage	hematopoietic.stem.cell	0.00864553	0
myeloid.progenitor	erythroblast	0.0085389	0
naive.b.cell	T.cell	0.00852619	0
memory.b.cell	plasma.cell	0.00850159	0
nampt.neutrophil	neutrophilic.myeloblast	0.00842993	0
memory.b.cell	T.cell	0.00840336	0
neutrophil	myelocyte	0.00838574	0
hematopoietic.stem.cell	immature.B.cell	0.00837989	0
hematopoietic.stem.cell	monocyte	0.00837321	0
granulocyte	plasma.cell	0.00827206	0
granulocyte	macrophage	0.00822562	0
cd4.positive..alpha.beta.t.cell	immature.B.cell	0.00802139	0
cd4.positive..alpha.beta.t.cell	conventional.dendritic.cell	0.00802139	0
plasma.cell	macrophage	0.00801068	0
granulocyte	basophil	0.00798935	0
monocyte	neutrophilic.metamyelocyte	0.00784314	0
nampt.neutrophil	hematopoietic.stem.cell	0.00769971	0
neutrophil	hematopoietic.stem.cell	0.00769231	0
monocyte	plasma.cell	0.00765864	0
cd8.positive..alpha.beta.t.cell	neutrophilic.myeloblast	0.00763359	0
hematopoietic.stem.cell	neutrophilic.myeloblast	0.00748503	0
memory.b.cell	proerythroblast	0.00737101	0
nampt.neutrophil	myelocyte	0.00733753	0
macrophage	immature.B.cell	0.00729395	0
macrophage	T.cell	0.00716332	0
granulocyte	monocyte	0.00714286	0
macrophage	band.form.neutrophil	0.00704225	0
plasma.cell	neutrophilic.myeloblast	0.00699301	0
myeloid.progenitor	conventional.dendritic.cell	0.00697674	0
nk.cell	neutrophilic.myeloblast	0.00693756	0
nk.cell	segmented.neutrophil.of.bone.marrow	0.00683177	0
monocyte	T.cell	0.00668151	0
plasma.cell	mature.B.cell	0.00666667	0
plasma.cell	promyelocyte	0.00662252	0
memory.b.cell	basophil	0.00661157	0
macrophage	reticulocyte	0.00616016	0
plasma.cell	basophil	0.00615385	0
macrophage	erythroblast	0.00610501	0
myeloid.progenitor	myelocyte	0.00589623	0
cd24.neutrophil	promyelocyte	0.0058309	0
plasma.cell	T.cell	0.00574713	0
neutrophil	T.cell	0.00574163	0
erythrocyte	monocyte	0.00567537	0
cd8.positive..alpha.beta.t.cell	myelocyte	0.00567108	0
hematopoietic.stem.cell	erythroblast	0.00566893	0
monocyte	myelocyte	0.00554017	0
cd24.neutrophil	T.cell	0.00551876	0
hematopoietic.stem.cell	proerythroblast	0.00545455	0
cd8.positive..alpha.beta.t.cell	erythroblast	0.00542005	0
erythroid.progenitor	monocyte	0.005386	0
granulocyte	erythroblast	0.00536913	0
erythrocyte	basophil	0.00535906	0
naive.b.cell	erythroblast	0.00529661	0
monocyte	mature.B.cell	0.00529101	0
hematopoietic.stem.cell	neutrophilic.metamyelocyte	0.00528169	0
cd4.positive..alpha.beta.t.cell	mature.B.cell	0.00527704	0
hematopoietic.stem.cell	T.cell	0.00524934	0
erythroid.progenitor	conventional.dendritic.cell	0.00519751	0
cd4.positive..alpha.beta.t.cell	proerythroblast	0.00506971	0
naive.b.cell	precursor.B.cell	0.00505689	0
plasma.cell	monocyte	0.00500835	0
myeloid.progenitor	band.form.neutrophil	0.00495663	0
nampt.neutrophil	precursor.B.cell	0.00494071	0
granulocyte	promyelocyte	0.00493827	0
myeloid.progenitor	monocyte	0.00493097	0
naive.b.cell	hematopoietic.stem.cell	0.00487211	0
granulocyte	neutrophilic.metamyelocyte	0.00464037	0
plasma.cell	myelocyte	0.00460829	0
plasma.cell	conventional.dendritic.cell	0.00447427	0
cd4.positive..alpha.beta.t.cell	hematopoietic.stem.cell	0.00446429	0
memory.b.cell	hematopoietic.stem.cell	0.00421053	0
naive.b.cell	myelocyte	0.00407609	0
plasma.cell	early.pro.B.cell	0.00405515	0
granulocyte	band.form.neutrophil	0.0040404	0
myeloid.progenitor	segmented.neutrophil.of.bone.marrow	0.00396825	0
macrophage	neutrophilic.metamyelocyte	0.00395257	0
neutrophil	precursor.B.cell	0.00394477	0
cd4.positive..alpha.beta.t.cell	neutrophilic.metamyelocyte	0.00389105	0
granulocyte	early.pro.B.cell	0.00374251	0
erythrocyte	T.cell	0.00372208	0
erythroid.progenitor	promyelocyte	0.003663	0
memory.b.cell	segmented.neutrophil.of.bone.marrow	0.00364964	0
nampt.neutrophil	reticulocyte	0.00359712	0
myeloid.progenitor	mature.B.cell	0.00346021	0
erythrocyte	segmented.neutrophil.of.bone.marrow	0.00342466	0
cd8.positive..alpha.beta.t.cell	precursor.B.cell	0.00341297	0
nk.cell	reticulocyte	0.00335946	0
nk.cell	neutrophilic.metamyelocyte	0.00329308	0
cd8.positive..alpha.beta.t.cell	hematopoietic.stem.cell	0.00324675	0
granulocyte	hematopoietic.stem.cell	0.00321027	0
granulocyte	T.cell	0.00319489	0
macrophage	mature.B.cell	0.00317965	0
naive.b.cell	neutrophilic.metamyelocyte	0.00316957	0
hematopoietic.stem.cell	band.form.neutrophil	0.00315956	0
plasma.cell	erythroblast	0.00310559	0
erythroid.progenitor	mature.B.cell	0.00309917	0
plasma.cell	neutrophilic.metamyelocyte	0.00303951	0
macrophage	precursor.B.cell	0.00299401	0
cd4.positive..alpha.beta.t.cell	neutrophilic.myeloblast	0.00278552	0
myeloid.progenitor	promyelocyte	0.00278164	0
cd4.positive..alpha.beta.t.cell	myelocyte	0.00275482	0
myeloid.progenitor	reticulocyte	0.00275103	0
hematopoietic.stem.cell	precursor.B.cell	0.00273598	0
erythrocyte	conventional.dendritic.cell	0.00273598	0
erythrocyte	mature.B.cell	0.00272109	0
monocyte	immature.B.cell	0.00266193	0
erythrocyte	precursor.B.cell	0.00258398	0
memory.b.cell	myelocyte	0.0025641	0
monocyte	proerythroblast	0.00253165	0
plasma.cell	immature.B.cell	0.0025	0
nampt.neutrophil	promyelocyte	0.00241838	0
erythroid.progenitor	reticulocyte	0.00241546	0
neutrophil	promyelocyte	0.00241546	0
monocyte	precursor.B.cell	0.00239234	0
cd8.positive..alpha.beta.t.cell	neutrophilic.metamyelocyte	0.00235294	0
plasma.cell	proerythroblast	0.0023175	0
nk.cell	promyelocyte	0.00225734	0
monocyte	hematopoietic.stem.cell	0.00223214	0
nk.cell	band.form.neutrophil	0.00204918	0
cd8.positive..alpha.beta.t.cell	band.form.neutrophil	0.00204499	0
plasma.cell	precursor.B.cell	0.00203666	0
cd4.positive..alpha.beta.t.cell	segmented.neutrophil.of.bone.marrow	0.00191571	0
hematopoietic.stem.cell	reticulocyte	0.00181159	0
erythroid.progenitor	segmented.neutrophil.of.bone.marrow	0.00180018	0
cd4.positive..alpha.beta.t.cell	erythroblast	0.0017452	0
plasma.cell	segmented.neutrophil.of.bone.marrow	0.0016835	0
memory.b.cell	erythroblast	0.00166667	0
naive.b.cell	promyelocyte	0.00165017	0
erythrocyte	neutrophilic.metamyelocyte	0.00163132	0
cd8.positive..alpha.beta.t.cell	segmented.neutrophil.of.bone.marrow	0.00144928	0
hematopoietic.stem.cell	mature.B.cell	0.001443	0
naive.b.cell	band.form.neutrophil	0.00143678	0
cd24.neutrophil	reticulocyte	0.00143472	0
granulocyte	segmented.neutrophil.of.bone.marrow	0.00143472	0
erythrocyte	neutrophilic.myeloblast	0.0013986	0
erythrocyte	myelocyte	0.00139082	0
naive.b.cell	neutrophilic.myeloblast	0.0013624	0
myeloid.progenitor	neutrophilic.metamyelocyte	0.00134048	0
hematopoietic.stem.cell	segmented.neutrophil.of.bone.marrow	0.0011976	0
erythroid.progenitor	neutrophilic.metamyelocyte	0.00118064	0
cd24.neutrophil	precursor.B.cell	0.00114025	0
cd24.neutrophil	hematopoietic.stem.cell	0.00110254	0
erythroid.progenitor	band.form.neutrophil	0.00109769	0
cd4.positive..alpha.beta.t.cell	reticulocyte	0	0
cd8.positive..alpha.beta.t.cell	reticulocyte	0	0
granulocyte	reticulocyte	0	0
memory.b.cell	reticulocyte	0	0
monocyte	reticulocyte	0	0
naive.b.cell	reticulocyte	0	0
neutrophil	reticulocyte	0	0
plasma.cell	reticulocyte	0	0
monocyte	erythroblast	0	0
cd4.positive..alpha.beta.t.cell	precursor.B.cell	0	0
memory.b.cell	precursor.B.cell	0	0
plasma.cell	hematopoietic.stem.cell	0	0
erythroid.progenitor	T.cell	0	0
granulocyte	mature.B.cell	0	0
cd4.positive..alpha.beta.t.cell	promyelocyte	0	0
cd8.positive..alpha.beta.t.cell	promyelocyte	0	0
erythrocyte	promyelocyte	0	0
hematopoietic.stem.cell	promyelocyte	0	0
memory.b.cell	promyelocyte	0	0
memory.b.cell	neutrophilic.myeloblast	0	0
memory.b.cell	neutrophilic.metamyelocyte	0	0
cd4.positive..alpha.beta.t.cell	band.form.neutrophil	0	0
erythrocyte	band.form.neutrophil	0	0
memory.b.cell	band.form.neutrophil	0	0
plasma.cell	band.form.neutrophil	0	0

## Sheet: Lung
Supplementary File 5B. Matching cell types between human and mouse in lung.
Human cell type	Mouse cell type	matchSCore2 score	Matching cell types (1=Yes, 0=No)
lung.ciliated.cell	ciliated.epithelial.cell	0.177681	1
adventitial.cell	fibroblast.1	0.155963	1
capillary.aerocyte	capillary.endothelial.cell	0.116006	1
type.ii.pneumocyte	pulmonary.ionocyte..type.II.pneumocyte	0.11336	1
alveolar.fibroblast	fibroblast.1	0.113043	1
b.cell	B.cell	0.110626	1
cd8.positive..alpha.beta.t.cell	lymphocyte	0.106838	1
alveolar.fibroblast	fibroblast	0.101078	1
neutrophil	neutrophil	0.0965278	1
capillary.endothelial.cell	capillary.endothelial.cell	0.0949598	1
endothelial.cell.of.artery	pulmonary.artery.endothelial.cell	0.0898618	1
pericyte.cell	pericyte.cell	0.0886005	1
vein.endothelial.cell	pulmonary.artery.endothelial.cell	0.0878049	1
capillary.endothelial.cell	pulmonary.artery.endothelial.cell	0.0767677	1
macrophage	alveolar.macrophage	0.0757576	1
cd4.positive..alpha.beta.t.cell	lymphocyte	0.0730435	1
pulmonary.ionocyte	ciliated.epithelial.cell	0.0681481	1
vascular.associated.smooth.muscle.cell	pericyte.cell	0.0646736	1
nk.cell	lymphocyte	0.063229	1
type.i.pneumocyte	pulmonary.ionocyte..type.II.pneumocyte	0.0615627	1
type.i.pneumocyte	ciliated.epithelial.cell	0.060981	1
non.classical.monocyte	alveolar.macrophage	0.0603645	1
cd4.positive..alpha.beta.t.cell	B.cell	0.0600293	1
dendritic.cell	classical.monocyte	0.0597345	1
capillary.aerocyte	pulmonary.artery.endothelial.cell	0.0594542	1
endothelial.cell.of.artery	capillary.endothelial.cell	0.0583269	1
non.classical.monocyte	classical.monocyte	0.0578158	1
club.cell	pulmonary.ionocyte..type.II.pneumocyte	0.0547112	1
non.classical.monocyte	non.classical.monocyte	0.0540541	1
macrophage	classical.monocyte	0.0529301	1
classical.monocyte	neutrophil	0.0519645	1
neutrophil	alveolar.macrophage	0.0514706	1
bronchial.smooth.muscle.cell	myofibroblast.cell	0.0509014	1
vascular.associated.smooth.muscle.cell	myofibroblast.cell	0.0500982	1
intermediate.monocyte	alveolar.macrophage	0.0497354	0
classical.monocyte	non.classical.monocyte	0.0489865	0
smooth.muscle.cell	pericyte.cell	0.0484286	0
fibroblast	pericyte.cell	0.0476796	0
endothelial.cell.of.lymphatic.vessel	capillary.endothelial.cell	0.0470064	0
intermediate.monocyte	non.classical.monocyte	0.0470016	0
adventitial.cell	fibroblast	0.0469361	0
classical.monocyte	alveolar.macrophage	0.0465368	0
endothelial.cell.of.lymphatic.vessel	pericyte.cell	0.0447828	0
bronchial.smooth.muscle.cell	pericyte.cell	0.0444862	0
dendritic.cell	non.classical.monocyte	0.043956	0
classical.monocyte	classical.monocyte	0.0433071	0
lung.microvascular.endothelial.cell	pulmonary.artery.endothelial.cell	0.0432692	0
alveolar.fibroblast	myofibroblast.cell	0.0403226	0
bronchial.vessel.endothelial.cell	pulmonary.artery.endothelial.cell	0.0389864	0
myofibroblast.cell	pericyte.cell	0.0384205	0
neutrophil	non.classical.monocyte	0.0378788	0
pulmonary.ionocyte	pericyte.cell	0.0376257	0
nk.cell	pericyte.cell	0.0373444	0
smooth.muscle.cell	ciliated.epithelial.cell	0.0369584	0
type.i.pneumocyte	capillary.endothelial.cell	0.0367347	0
adventitial.cell	myofibroblast.cell	0.0361305	0
vascular.associated.smooth.muscle.cell	fibroblast	0.0358272	0
mesothelial.cell	fibroblast.1	0.034398	0
myofibroblast.cell	ciliated.epithelial.cell	0.0342146	0
plasmacytoid.dendritic.cell	B.cell	0.0340909	0
bronchial.vessel.endothelial.cell	capillary.endothelial.cell	0.0337931	0
vein.endothelial.cell	capillary.endothelial.cell	0.0337711	0
plasmacytoid.dendritic.cell	capillary.endothelial.cell	0.033348	0
plasmacytoid.dendritic.cell	ciliated.epithelial.cell	0.0329518	0
plasmacytoid.dendritic.cell	pericyte.cell	0.0329317	0
serous.cell.of.epithelium.of.bronchus	pulmonary.ionocyte..type.II.pneumocyte	0.0327456	0
intermediate.monocyte	neutrophil	0.0326087	0
fibroblast	ciliated.epithelial.cell	0.0317726	0
pericyte.cell	fibroblast	0.0309187	0
plasmacytoid.dendritic.cell	alveolar.macrophage	0.0303773	0
macrophage	neutrophil	0.0300481	0
non.classical.monocyte	neutrophil	0.0298314	0
capillary.aerocyte	pericyte.cell	0.0296384	0
bronchial.smooth.muscle.cell	fibroblast	0.0295791	0
respiratory.goblet.cell	pulmonary.ionocyte..type.II.pneumocyte	0.0295567	0
smooth.muscle.cell	capillary.endothelial.cell	0.0294451	0
dendritic.cell	neutrophil	0.0290621	0
basophil	alveolar.macrophage	0.0290323	0
basal.cell	ciliated.epithelial.cell	0.0286697	0
cd8.positive..alpha.beta.t.cell	neutrophil	0.0284775	0
fibroblast	capillary.endothelial.cell	0.0283901	0
pulmonary.ionocyte	capillary.endothelial.cell	0.0282759	0
neutrophil	pericyte.cell	0.0282353	0
vascular.associated.smooth.muscle.cell	fibroblast.1	0.0280736	0
respiratory.mucous.cell	pulmonary.ionocyte..type.II.pneumocyte	0.0280146	0
nk.cell	capillary.endothelial.cell	0.0274527	0
dendritic.cell	B.cell	0.0269504	0
type.i.pneumocyte	pericyte.cell	0.0267627	0
cd8.positive..alpha.beta.t.cell	B.cell	0.0267131	0
pericyte.cell	capillary.endothelial.cell	0.0263789	0
endothelial.cell.of.lymphatic.vessel	pulmonary.artery.endothelial.cell	0.0262195	0
pericyte.cell	myofibroblast.cell	0.026208	0
alveolar.fibroblast	pericyte.cell	0.0259909	0
intermediate.monocyte	classical.monocyte	0.025878	0
endothelial.cell.of.lymphatic.vessel	ciliated.epithelial.cell	0.0258427	0
vein.endothelial.cell	fibroblast.1	0.0258065	0
dendritic.cell	alveolar.macrophage	0.0257559	0
nk.cell	B.cell	0.0256553	0
fibroblast	fibroblast.1	0.0251079	0
basophil	lymphocyte	0.0249221	0
type.i.pneumocyte	alveolar.macrophage	0.0248489	0
myofibroblast.cell	capillary.endothelial.cell	0.0246492	0
bronchial.vessel.endothelial.cell	pericyte.cell	0.0244776	0
myofibroblast.cell	myofibroblast.cell	0.0242009	0
respiratory.goblet.cell	ciliated.epithelial.cell	0.0237226	0
nk.cell	alveolar.macrophage	0.0236895	0
basal.cell	pulmonary.ionocyte..type.II.pneumocyte	0.0235784	0
smooth.muscle.cell	fibroblast.1	0.0234671	0
fibroblast	fibroblast	0.0234249	0
type.ii.pneumocyte	ciliated.epithelial.cell	0.023395	0
club.cell	ciliated.epithelial.cell	0.0233918	0
bronchial.smooth.muscle.cell	ciliated.epithelial.cell	0.0231984	0
plasmacytoid.dendritic.cell	neutrophil	0.0228928	0
basophil	B.cell	0.0227273	0
pulmonary.ionocyte	alveolar.macrophage	0.0224719	0
macrophage	non.classical.monocyte	0.022082	0
capillary.endothelial.cell	pericyte.cell	0.0220369	0
bronchial.smooth.muscle.cell	capillary.endothelial.cell	0.0218464	0
nk.cell	neutrophil	0.021575	0
adventitial.cell	pericyte.cell	0.0215405	0
lung.microvascular.endothelial.cell	fibroblast.1	0.0214876	0
nk.cell	ciliated.epithelial.cell	0.0214411	0
pericyte.cell	fibroblast.1	0.0213115	0
bronchial.vessel.endothelial.cell	alveolar.macrophage	0.021294	0
neutrophil	capillary.endothelial.cell	0.0212766	0
nk.cell	non.classical.monocyte	0.0212121	0
basophil	pulmonary.ionocyte..type.II.pneumocyte	0.0210526	0
club.cell	fibroblast	0.0210526	0
smooth.muscle.cell	myofibroblast.cell	0.0210368	0
neutrophil	ciliated.epithelial.cell	0.0208826	0
endothelial.cell.of.lymphatic.vessel	fibroblast.1	0.0204082	0
vein.endothelial.cell	fibroblast	0.0201465	0
respiratory.mucous.cell	ciliated.epithelial.cell	0.0198604	0
plasmacytoid.dendritic.cell	lymphocyte	0.0197852	0
serous.cell.of.epithelium.of.bronchus	ciliated.epithelial.cell	0.0195652	0
nk.cell	myofibroblast.cell	0.019564	0
cd8.positive..alpha.beta.t.cell	non.classical.monocyte	0.0195531	0
bronchial.vessel.endothelial.cell	B.cell	0.0193237	0
endothelial.cell.of.artery	pericyte.cell	0.0191571	0
intermediate.monocyte	lymphocyte	0.0191176	0
endothelial.cell.of.artery	myofibroblast.cell	0.0188261	0
pulmonary.ionocyte	pulmonary.ionocyte..type.II.pneumocyte	0.0183779	0
capillary.endothelial.cell	neutrophil	0.0183486	0
pericyte.cell	ciliated.epithelial.cell	0.0183166	0
bronchial.vessel.endothelial.cell	ciliated.epithelial.cell	0.0182342	0
capillary.aerocyte	myofibroblast.cell	0.0182342	0
type.i.pneumocyte	pulmonary.artery.endothelial.cell	0.0181681	0
dendritic.cell	lymphocyte	0.0181518	0
fibroblast	myofibroblast.cell	0.017871	0
myofibroblast.cell	fibroblast.1	0.0177515	0
pulmonary.ionocyte	myofibroblast.cell	0.0177491	0
endothelial.cell.of.lymphatic.vessel	alveolar.macrophage	0.0174672	0
lung.ciliated.cell	pericyte.cell	0.0174626	0
pericyte.cell	alveolar.macrophage	0.0174216	0
mesothelial.cell	fibroblast	0.0173333	0
basophil	ciliated.epithelial.cell	0.0172127	0
vascular.associated.smooth.muscle.cell	ciliated.epithelial.cell	0.0170213	0
cd4.positive..alpha.beta.t.cell	neutrophil	0.0169713	0
smooth.muscle.cell	alveolar.macrophage	0.0168831	0
endothelial.cell.of.lymphatic.vessel	fibroblast	0.0168285	0
capillary.aerocyte	ciliated.epithelial.cell	0.0166034	0
fibroblast	alveolar.macrophage	0.0165408	0
endothelial.cell.of.artery	neutrophil	0.0164271	0
mesothelial.cell	capillary.endothelial.cell	0.016317	0
capillary.endothelial.cell	alveolar.macrophage	0.0162999	0
smooth.muscle.cell	B.cell	0.0162722	0
plasmacytoid.dendritic.cell	non.classical.monocyte	0.0161943	0
b.cell	neutrophil	0.0161491	0
lung.microvascular.endothelial.cell	capillary.endothelial.cell	0.0159325	0
pericyte.cell	pulmonary.ionocyte..type.II.pneumocyte	0.0158856	0
neutrophil	pulmonary.ionocyte..type.II.pneumocyte	0.0158835	0
neutrophil	lymphocyte	0.0157706	0
pulmonary.ionocyte	pulmonary.artery.endothelial.cell	0.0155378	0
bronchial.smooth.muscle.cell	fibroblast.1	0.0154799	0
neutrophil	B.cell	0.0153231	0
endothelial.cell.of.lymphatic.vessel	neutrophil	0.0152851	0
capillary.aerocyte	alveolar.macrophage	0.0152122	0
lung.ciliated.cell	pulmonary.ionocyte..type.II.pneumocyte	0.0151934	0
macrophage	B.cell	0.0151899	0
mesothelial.cell	pulmonary.ionocyte..type.II.pneumocyte	0.0150812	0
endothelial.cell.of.lymphatic.vessel	pulmonary.ionocyte..type.II.pneumocyte	0.0150784	0
macrophage	pulmonary.ionocyte..type.II.pneumocyte	0.0149813	0
basophil	non.classical.monocyte	0.0149502	0
lung.microvascular.endothelial.cell	pericyte.cell	0.0148206	0
bronchial.vessel.endothelial.cell	fibroblast.1	0.0147348	0
macrophage	ciliated.epithelial.cell	0.014658	0
bronchial.vessel.endothelial.cell	myofibroblast.cell	0.0146341	0
type.i.pneumocyte	neutrophil	0.0146092	0
vascular.associated.smooth.muscle.cell	capillary.endothelial.cell	0.0146082	0
endothelial.cell.of.artery	fibroblast.1	0.0144444	0
basal.cell	fibroblast.1	0.0143885	0
capillary.aerocyte	neutrophil	0.0143498	0
mesothelial.cell	myofibroblast.cell	0.0143369	0
myofibroblast.cell	pulmonary.artery.endothelial.cell	0.0143049	0
lung.microvascular.endothelial.cell	B.cell	0.0142631	0
cd4.positive..alpha.beta.t.cell	non.classical.monocyte	0.0142349	0
mesothelial.cell	ciliated.epithelial.cell	0.0141807	0
dendritic.cell	capillary.endothelial.cell	0.0138889	0
adventitial.cell	alveolar.macrophage	0.013876	0
non.classical.monocyte	capillary.endothelial.cell	0.0137104	0
endothelial.cell.of.artery	alveolar.macrophage	0.0134892	0
classical.monocyte	fibroblast.1	0.013459	0
endothelial.cell.of.lymphatic.vessel	B.cell	0.0133333	0
b.cell	non.classical.monocyte	0.0133111	0
mesothelial.cell	pericyte.cell	0.013289	0
myofibroblast.cell	alveolar.macrophage	0.0132341	0
lung.microvascular.endothelial.cell	fibroblast	0.0131579	0
type.i.pneumocyte	myofibroblast.cell	0.0130568	0
fibroblast	pulmonary.ionocyte..type.II.pneumocyte	0.0130168	0
cd8.positive..alpha.beta.t.cell	capillary.endothelial.cell	0.0129672	0
serous.cell.of.epithelium.of.bronchus	fibroblast.1	0.01287	0
capillary.endothelial.cell	lymphocyte	0.0128205	0
adventitial.cell	capillary.endothelial.cell	0.0127724	0
plasmacytoid.dendritic.cell	classical.monocyte	0.012766	0
pulmonary.ionocyte	neutrophil	0.0124951	0
fibroblast	pulmonary.artery.endothelial.cell	0.0122418	0
pericyte.cell	neutrophil	0.0122418	0
cd8.positive..alpha.beta.t.cell	alveolar.macrophage	0.0122295	0
endothelial.cell.of.lymphatic.vessel	myofibroblast.cell	0.0122175	0
endothelial.cell.of.artery	fibroblast	0.0121359	0
classical.monocyte	lymphocyte	0.0121212	0
club.cell	myofibroblast.cell	0.0121212	0
plasmacytoid.dendritic.cell	pulmonary.artery.endothelial.cell	0.0121116	0
nk.cell	pulmonary.artery.endothelial.cell	0.012035	0
respiratory.goblet.cell	fibroblast.1	0.011925	0
adventitial.cell	ciliated.epithelial.cell	0.011807	0
serous.cell.of.epithelium.of.bronchus	pericyte.cell	0.0116999	0
macrophage	fibroblast.1	0.0116732	0
type.i.pneumocyte	fibroblast.1	0.0115652	0
capillary.endothelial.cell	ciliated.epithelial.cell	0.0114395	0
intermediate.monocyte	capillary.endothelial.cell	0.0113821	0
lung.microvascular.endothelial.cell	myofibroblast.cell	0.0113269	0
myofibroblast.cell	B.cell	0.0111957	0
smooth.muscle.cell	fibroblast	0.0111199	0
plasma.cell	fibroblast.1	0.0110619	0
type.ii.pneumocyte	alveolar.macrophage	0.0110553	0
adventitial.cell	pulmonary.artery.endothelial.cell	0.0110497	0
dendritic.cell	pulmonary.ionocyte..type.II.pneumocyte	0.0110041	0
endothelial.cell.of.artery	lymphocyte	0.010989	0
bronchial.smooth.muscle.cell	pulmonary.ionocyte..type.II.pneumocyte	0.0109344	0
bronchial.smooth.muscle.cell	pulmonary.artery.endothelial.cell	0.0109344	0
nk.cell	pulmonary.ionocyte..type.II.pneumocyte	0.010929	0
respiratory.mucous.cell	pericyte.cell	0.0108254	0
b.cell	lymphocyte	0.0107858	0
plasmacytoid.dendritic.cell	myofibroblast.cell	0.010661	0
capillary.endothelial.cell	fibroblast	0.0105932	0
b.cell	alveolar.macrophage	0.010582	0
vein.endothelial.cell	pulmonary.ionocyte..type.II.pneumocyte	0.010574	0
plasma.cell	B.cell	0.0105485	0
macrophage	capillary.endothelial.cell	0.0105434	0
mesothelial.cell	alveolar.macrophage	0.0105263	0
classical.monocyte	B.cell	0.0104302	0
basophil	pulmonary.artery.endothelial.cell	0.0104167	0
club.cell	alveolar.macrophage	0.0103926	0
intermediate.monocyte	pericyte.cell	0.0103734	0
basal.cell	capillary.endothelial.cell	0.0103538	0
pericyte.cell	pulmonary.artery.endothelial.cell	0.0102686	0
neutrophil	classical.monocyte	0.0102686	0
myofibroblast.cell	pulmonary.ionocyte..type.II.pneumocyte	0.0102404	0
smooth.muscle.cell	pulmonary.artery.endothelial.cell	0.0102115	0
vascular.associated.smooth.muscle.cell	pulmonary.ionocyte..type.II.pneumocyte	0.0101476	0
bronchial.smooth.muscle.cell	alveolar.macrophage	0.010118	0
serous.cell.of.epithelium.of.bronchus	alveolar.macrophage	0.0100908	0
pulmonary.ionocyte	fibroblast.1	0.0100361	0
basophil	capillary.endothelial.cell	0.0100251	0
cd4.positive..alpha.beta.t.cell	myofibroblast.cell	0.00997151	0
lung.ciliated.cell	capillary.endothelial.cell	0.00995406	0
b.cell	pericyte.cell	0.00992908	0
serous.cell.of.epithelium.of.bronchus	pulmonary.artery.endothelial.cell	0.00985222	0
basophil	neutrophil	0.00985222	0
type.i.pneumocyte	fibroblast	0.00982801	0
respiratory.goblet.cell	fibroblast	0.00980392	0
alveolar.fibroblast	pulmonary.ionocyte..type.II.pneumocyte	0.00978261	0
capillary.endothelial.cell	fibroblast.1	0.00977517	0
lung.ciliated.cell	alveolar.macrophage	0.00973339	0
basal.cell	B.cell	0.00972222	0
macrophage	pericyte.cell	0.00966184	0
non.classical.monocyte	lymphocyte	0.00958466	0
type.ii.pneumocyte	pericyte.cell	0.00958248	0
fibroblast	B.cell	0.00957854	0
respiratory.mucous.cell	pulmonary.artery.endothelial.cell	0.00956938	0
vascular.associated.smooth.muscle.cell	alveolar.macrophage	0.00949367	0
cd8.positive..alpha.beta.t.cell	classical.monocyte	0.00947867	0
capillary.endothelial.cell	pulmonary.ionocyte..type.II.pneumocyte	0.0094697	0
lung.microvascular.endothelial.cell	lymphocyte	0.0094697	0
plasmacytoid.dendritic.cell	pulmonary.ionocyte..type.II.pneumocyte	0.00945378	0
neutrophil	fibroblast.1	0.0094086	0
fibroblast	neutrophil	0.00938086	0
capillary.aerocyte	lymphocyte	0.009375	0
mesothelial.cell	pulmonary.artery.endothelial.cell	0.00922722	0
club.cell	fibroblast.1	0.00916031	0
basophil	fibroblast	0.00911854	0
smooth.muscle.cell	non.classical.monocyte	0.00909843	0
type.i.pneumocyte	lymphocyte	0.00904605	0
club.cell	pericyte.cell	0.00900901	0
classical.monocyte	pulmonary.ionocyte..type.II.pneumocyte	0.00898588	0
lung.ciliated.cell	neutrophil	0.00897263	0
club.cell	capillary.endothelial.cell	0.00895255	0
type.ii.pneumocyte	fibroblast.1	0.0089172	0
serous.cell.of.epithelium.of.bronchus	capillary.endothelial.cell	0.00885668	0
type.ii.pneumocyte	myofibroblast.cell	0.00883838	0
intermediate.monocyte	B.cell	0.00882724	0
mesothelial.cell	neutrophil	0.00878156	0
smooth.muscle.cell	lymphocyte	0.00875796	0
capillary.aerocyte	non.classical.monocyte	0.00875274	0
smooth.muscle.cell	pulmonary.ionocyte..type.II.pneumocyte	0.00873999	0
dendritic.cell	pericyte.cell	0.00873999	0
myofibroblast.cell	neutrophil	0.0087222	0
non.classical.monocyte	pericyte.cell	0.00864553	0
capillary.endothelial.cell	B.cell	0.00860421	0
endothelial.cell.of.artery	ciliated.epithelial.cell	0.00856423	0
endothelial.cell.of.artery	pulmonary.ionocyte..type.II.pneumocyte	0.00852878	0
pulmonary.ionocyte	non.classical.monocyte	0.00846024	0
dendritic.cell	ciliated.epithelial.cell	0.00844595	0
vein.endothelial.cell	alveolar.macrophage	0.00830368	0
alveolar.fibroblast	neutrophil	0.00829016	0
pulmonary.ionocyte	fibroblast	0.00827472	0
capillary.aerocyte	fibroblast	0.00827301	0
classical.monocyte	capillary.endothelial.cell	0.0082713	0
non.classical.monocyte	B.cell	0.00818554	0
alveolar.fibroblast	capillary.endothelial.cell	0.00814212	0
non.classical.monocyte	pulmonary.ionocyte..type.II.pneumocyte	0.00806452	0
basophil	myofibroblast.cell	0.00806452	0
neutrophil	myofibroblast.cell	0.00801603	0
type.ii.pneumocyte	capillary.endothelial.cell	0.00801282	0
cd4.positive..alpha.beta.t.cell	pericyte.cell	0.00800582	0
basal.cell	pericyte.cell	0.00798838	0
myofibroblast.cell	fibroblast	0.00794393	0
pulmonary.ionocyte	B.cell	0.00794281	0
non.classical.monocyte	fibroblast	0.00789889	0
neutrophil	pulmonary.artery.endothelial.cell	0.00787919	0
vein.endothelial.cell	myofibroblast.cell	0.00783699	0
capillary.endothelial.cell	non.classical.monocyte	0.00782998	0
cd8.positive..alpha.beta.t.cell	pericyte.cell	0.00782779	0
basophil	pericyte.cell	0.00777385	0
cd4.positive..alpha.beta.t.cell	capillary.endothelial.cell	0.00776531	0
smooth.muscle.cell	neutrophil	0.0077574	0
serous.cell.of.epithelium.of.bronchus	non.classical.monocyte	0.00769231	0
basal.cell	alveolar.macrophage	0.00767544	0
alveolar.fibroblast	ciliated.epithelial.cell	0.00761421	0
b.cell	fibroblast	0.00761035	0
alveolar.fibroblast	pulmonary.artery.endothelial.cell	0.00759219	0
intermediate.monocyte	ciliated.epithelial.cell	0.00755532	0
type.i.pneumocyte	B.cell	0.00755287	0
endothelial.cell.of.artery	B.cell	0.0075431	0
respiratory.goblet.cell	neutrophil	0.00750751	0
capillary.aerocyte	B.cell	0.00749064	0
vascular.associated.smooth.muscle.cell	pulmonary.artery.endothelial.cell	0.00735971	0
endothelial.cell.of.lymphatic.vessel	non.classical.monocyte	0.00729927	0
lung.microvascular.endothelial.cell	alveolar.macrophage	0.00726392	0
bronchial.vessel.endothelial.cell	neutrophil	0.00725953	0
macrophage	lymphocyte	0.00724638	0
pericyte.cell	non.classical.monocyte	0.00723327	0
macrophage	fibroblast	0.00718391	0
serous.cell.of.epithelium.of.bronchus	fibroblast	0.00711238	0
dendritic.cell	myofibroblast.cell	0.00710227	0
lung.microvascular.endothelial.cell	ciliated.epithelial.cell	0.00707965	0
basal.cell	myofibroblast.cell	0.00707214	0
pulmonary.ionocyte	lymphocyte	0.00704225	0
cd8.positive..alpha.beta.t.cell	myofibroblast.cell	0.00695249	0
lung.ciliated.cell	myofibroblast.cell	0.00693161	0
capillary.endothelial.cell	myofibroblast.cell	0.00677638	0
cd8.positive..alpha.beta.t.cell	ciliated.epithelial.cell	0.00670795	0
bronchial.vessel.endothelial.cell	non.classical.monocyte	0.00670391	0
capillary.aerocyte	fibroblast.1	0.00668577	0
plasmacytoid.dendritic.cell	fibroblast	0.00667408	0
b.cell	capillary.endothelial.cell	0.00667223	0
respiratory.goblet.cell	capillary.endothelial.cell	0.00664767	0
bronchial.smooth.muscle.cell	neutrophil	0.00664137	0
adventitial.cell	pulmonary.ionocyte..type.II.pneumocyte	0.00660066	0
intermediate.monocyte	fibroblast.1	0.00646831	0
basal.cell	fibroblast	0.00643087	0
respiratory.goblet.cell	pulmonary.artery.endothelial.cell	0.00642055	0
intermediate.monocyte	myofibroblast.cell	0.00641026	0
pericyte.cell	B.cell	0.00634921	0
alveolar.fibroblast	alveolar.macrophage	0.00634633	0
classical.monocyte	pericyte.cell	0.00630694	0
respiratory.mucous.cell	capillary.endothelial.cell	0.00630418	0
respiratory.goblet.cell	alveolar.macrophage	0.00622665	0
intermediate.monocyte	pulmonary.artery.endothelial.cell	0.00620347	0
respiratory.mucous.cell	fibroblast.1	0.00620347	0
vascular.associated.smooth.muscle.cell	lymphocyte	0.0061792	0
non.classical.monocyte	ciliated.epithelial.cell	0.00612813	0
type.ii.pneumocyte	pulmonary.artery.endothelial.cell	0.00609756	0
type.i.pneumocyte	non.classical.monocyte	0.0059676	0
bronchial.smooth.muscle.cell	non.classical.monocyte	0.00590319	0
serous.cell.of.epithelium.of.bronchus	neutrophil	0.00582072	0
basophil	classical.monocyte	0.00580271	0
type.ii.pneumocyte	neutrophil	0.00578704	0
lung.ciliated.cell	fibroblast	0.00576646	0
intermediate.monocyte	fibroblast	0.0057554	0
fibroblast	non.classical.monocyte	0.00567491	0
vein.endothelial.cell	neutrophil	0.00564175	0
type.ii.pneumocyte	fibroblast	0.00564175	0
non.classical.monocyte	fibroblast.1	0.0056101	0
capillary.aerocyte	pulmonary.ionocyte..type.II.pneumocyte	0.00555042	0
respiratory.mucous.cell	fibroblast	0.00549451	0
cd4.positive..alpha.beta.t.cell	alveolar.macrophage	0.00548847	0
basophil	fibroblast.1	0.00541272	0
plasma.cell	lymphocyte	0.00540541	0
serous.cell.of.epithelium.of.bronchus	classical.monocyte	0.00534759	0
bronchial.vessel.endothelial.cell	lymphocyte	0.00530223	0
bronchial.vessel.endothelial.cell	fibroblast	0.0052687	0
vein.endothelial.cell	ciliated.epithelial.cell	0.00524476	0
endothelial.cell.of.artery	non.classical.monocyte	0.00514801	0
basal.cell	neutrophil	0.00514139	0
classical.monocyte	pulmonary.artery.endothelial.cell	0.00511509	0
lung.microvascular.endothelial.cell	classical.monocyte	0.00508906	0
serous.cell.of.epithelium.of.bronchus	myofibroblast.cell	0.00506329	0
lung.ciliated.cell	B.cell	0.00503894	0
bronchial.vessel.endothelial.cell	classical.monocyte	0.00496278	0
intermediate.monocyte	pulmonary.ionocyte..type.II.pneumocyte	0.00495663	0
neutrophil	fibroblast	0.0049435	0
b.cell	ciliated.epithelial.cell	0.00494234	0
classical.monocyte	ciliated.epithelial.cell	0.00490998	0
basal.cell	lymphocyte	0.00486224	0
cd4.positive..alpha.beta.t.cell	fibroblast	0.00483871	0
dendritic.cell	fibroblast	0.00483871	0
capillary.aerocyte	classical.monocyte	0.00483676	0
respiratory.mucous.cell	B.cell	0.00482509	0
mesothelial.cell	B.cell	0.00465116	0
vein.endothelial.cell	B.cell	0.00458015	0
vein.endothelial.cell	pericyte.cell	0.00456969	0
lung.ciliated.cell	pulmonary.artery.endothelial.cell	0.00455581	0
endothelial.cell.of.lymphatic.vessel	lymphocyte	0.00449294	0
nk.cell	classical.monocyte	0.00441084	0
vascular.associated.smooth.muscle.cell	neutrophil	0.00440917	0
alveolar.fibroblast	B.cell	0.00437637	0
endothelial.cell.of.artery	classical.monocyte	0.00436681	0
lung.microvascular.endothelial.cell	neutrophil	0.00433526	0
myofibroblast.cell	non.classical.monocyte	0.00429594	0
plasma.cell	classical.monocyte	0.00429185	0
serous.cell.of.epithelium.of.bronchus	lymphocyte	0.00429185	0
cd4.positive..alpha.beta.t.cell	fibroblast.1	0.00429185	0
myofibroblast.cell	lymphocyte	0.00420168	0
non.classical.monocyte	myofibroblast.cell	0.00416089	0
lung.microvascular.endothelial.cell	non.classical.monocyte	0.00413223	0
dendritic.cell	pulmonary.artery.endothelial.cell	0.00409836	0
basal.cell	pulmonary.artery.endothelial.cell	0.00408163	0
club.cell	neutrophil	0.00408163	0
non.classical.monocyte	pulmonary.artery.endothelial.cell	0.00401606	0
bronchial.smooth.muscle.cell	B.cell	0.00399202	0
vein.endothelial.cell	non.classical.monocyte	0.00398406	0
fibroblast	lymphocyte	0.00397141	0
classical.monocyte	myofibroblast.cell	0.00396301	0
alveolar.fibroblast	non.classical.monocyte	0.00394218	0
cd4.positive..alpha.beta.t.cell	ciliated.epithelial.cell	0.00392377	0
respiratory.mucous.cell	alveolar.macrophage	0.00391773	0
b.cell	pulmonary.ionocyte..type.II.pneumocyte	0.00389105	0
lung.ciliated.cell	lymphocyte	0.003848	0
cd8.positive..alpha.beta.t.cell	fibroblast	0.00384615	0
macrophage	myofibroblast.cell	0.00382653	0
bronchial.vessel.endothelial.cell	pulmonary.ionocyte..type.II.pneumocyte	0.00376648	0
plasma.cell	neutrophil	0.0037594	0
capillary.endothelial.cell	classical.monocyte	0.00371747	0
macrophage	pulmonary.artery.endothelial.cell	0.0037037	0
type.ii.pneumocyte	B.cell	0.00369914	0
lung.ciliated.cell	fibroblast.1	0.00369686	0
type.i.pneumocyte	classical.monocyte	0.00368664	0
respiratory.mucous.cell	myofibroblast.cell	0.00368098	0
vein.endothelial.cell	lymphocyte	0.00364299	0
vascular.associated.smooth.muscle.cell	classical.monocyte	0.00358852	0
smooth.muscle.cell	classical.monocyte	0.00355556	0
endothelial.cell.of.lymphatic.vessel	classical.monocyte	0.00351617	0
basal.cell	non.classical.monocyte	0.00350263	0
pulmonary.ionocyte	classical.monocyte	0.00350109	0
respiratory.mucous.cell	classical.monocyte	0.00341297	0
respiratory.mucous.cell	neutrophil	0.00338983	0
cd8.positive..alpha.beta.t.cell	pulmonary.ionocyte..type.II.pneumocyte	0.00336323	0
cd8.positive..alpha.beta.t.cell	pulmonary.artery.endothelial.cell	0.00336323	0
bronchial.smooth.muscle.cell	lymphocyte	0.00334821	0
respiratory.goblet.cell	B.cell	0.00325733	0
mesothelial.cell	classical.monocyte	0.00324149	0
plasmacytoid.dendritic.cell	fibroblast.1	0.0031864	0
respiratory.goblet.cell	pericyte.cell	0.00314218	0
lung.microvascular.endothelial.cell	pulmonary.ionocyte..type.II.pneumocyte	0.00308166	0
type.ii.pneumocyte	non.classical.monocyte	0.00303951	0
plasma.cell	alveolar.macrophage	0.00298954	0
classical.monocyte	fibroblast	0.00297619	0
respiratory.mucous.cell	non.classical.monocyte	0.00295421	0
pericyte.cell	classical.monocyte	0.00294118	0
nk.cell	fibroblast	0.00288517	0
dendritic.cell	fibroblast.1	0.00285714	0
vascular.associated.smooth.muscle.cell	B.cell	0.00277521	0
respiratory.mucous.cell	lymphocyte	0.00276243	0
respiratory.goblet.cell	classical.monocyte	0.0027027	0
plasma.cell	ciliated.epithelial.cell	0.00259403	0
lung.ciliated.cell	classical.monocyte	0.00257202	0
adventitial.cell	lymphocyte	0.00251572	0
myofibroblast.cell	classical.monocyte	0.00249004	0
serous.cell.of.epithelium.of.bronchus	B.cell	0.00247831	0
alveolar.fibroblast	lymphocyte	0.00247219	0
lung.ciliated.cell	non.classical.monocyte	0.002457	0
cd8.positive..alpha.beta.t.cell	fibroblast.1	0.00232558	0
nk.cell	fibroblast.1	0.00220629	0
plasma.cell	myofibroblast.cell	0.00215983	0
vascular.associated.smooth.muscle.cell	non.classical.monocyte	0.00215517	0
cd4.positive..alpha.beta.t.cell	classical.monocyte	0.00209205	0
adventitial.cell	neutrophil	0.00208986	0
plasma.cell	pulmonary.ionocyte..type.II.pneumocyte	0.00204499	0
b.cell	classical.monocyte	0.00193424	0
club.cell	non.classical.monocyte	0.00189394	0
plasma.cell	pericyte.cell	0.00175747	0
pericyte.cell	lymphocyte	0.00172563	0
fibroblast	classical.monocyte	0.00167645	0
respiratory.goblet.cell	myofibroblast.cell	0.00166667	0
adventitial.cell	classical.monocyte	0.00151976	0
club.cell	B.cell	0.00146628	0
club.cell	pulmonary.artery.endothelial.cell	0.001443	0
mesothelial.cell	non.classical.monocyte	0.00141044	0
cd4.positive..alpha.beta.t.cell	pulmonary.ionocyte..type.II.pneumocyte	0.0013624	0
cd4.positive..alpha.beta.t.cell	pulmonary.artery.endothelial.cell	0.0013624	0
b.cell	myofibroblast.cell	0.00133869	0
adventitial.cell	non.classical.monocyte	0.00133511	0
mesothelial.cell	lymphocyte	0.00132275	0
bronchial.smooth.muscle.cell	classical.monocyte	0.00131579	0
b.cell	pulmonary.artery.endothelial.cell	0.00129366	0
adventitial.cell	B.cell	0.00110742	0
plasma.cell	pulmonary.artery.endothelial.cell	0	0
plasma.cell	capillary.endothelial.cell	0	0
alveolar.fibroblast	classical.monocyte	0	0
basal.cell	classical.monocyte	0	0
club.cell	classical.monocyte	0	0
type.ii.pneumocyte	classical.monocyte	0	0
vein.endothelial.cell	classical.monocyte	0	0
plasma.cell	non.classical.monocyte	0	0
respiratory.goblet.cell	non.classical.monocyte	0	0
club.cell	lymphocyte	0	0
respiratory.goblet.cell	lymphocyte	0	0
type.ii.pneumocyte	lymphocyte	0	0
plasma.cell	fibroblast	0	0
b.cell	fibroblast.1	0	0

## Sheet: Skeletal muscle
Supplementary File 5C. Matching cell types between human and mouse in skeletal muscle.
Human cell type	Mouse cell type	matchSCore2 score	Matching cell types (1=Yes, 0=No)
fast.muscle.cell	striated.muscle.cell	0.287471	1
slow.muscle.cell	striated.muscle.cell	0.274215	1
macrophage	macrophage	0.168624	1
tendon.cell	tendon.cell	0.146259	1
pericyte.cell	pericyte.cell	0.127132	1
capillary.endothelial.cell	capillary.endothelial.cell	0.122664	1
endothelial.cell.of.vascular.tree	vein.endothelial.cell..endothelial.stalk.cell	0.114074	1
skeletal.muscle.satellite.stem.cell	skeletal.muscle.satellite.cell	0.107266	1
smooth.muscle.cell	pericyte.cell	0.102218	1
endothelial.cell.of.artery	endothelial.cell.of.artery	0.0946746	1
endothelial.cell.of.lymphatic.vessel	endothelial.cell.of.lymphatic.vessel	0.0924464	1
capillary.endothelial.cell	blood.vessel.endothelial.cell	0.0904459	1
mesenchymal.stem.cell	skeletal.muscle.fibroblast..fibroblast.1	0.0889262	1
mesenchymal.stem.cell	skeletal.muscle.fibroblast..fibroblast	0.0798226	1
capillary.endothelial.cell	endothelial.cell.of.artery	0.0723926	1
mesenchymal.stem.cell	stromal.cell	0.0704787	1
mature.nk.t.cell	T.helper.17.cell	0.0687023	1
t.cell	T.helper.17.cell	0.0675346	1
macrophage	monocyte.derived.dendritic.cell	0.0598065	1
endothelial.cell.of.artery	capillary.endothelial.cell	0.0596859	1
endothelial.cell.of.artery	vein.endothelial.cell..endothelial.stalk.cell	0.0573034	1
t.cell	B.cell	0.0532544	1
cd8.positive..alpha.beta.t.cell	CD8.positive..alpha.beta.T.cell	0.0520646	1
cd4.positive..alpha.beta.t.cell	CD8.positive..alpha.beta.T.cell	0.0512821	1
tendon.cell	skeletal.muscle.fibroblast..fibroblast.1	0.0502355	1
t.cell	CD8.positive..alpha.beta.T.cell	0.0490566	0
capillary.endothelial.cell	vein.endothelial.cell..endothelial.stalk.cell	0.0482921	0
tendon.cell	stromal.cell	0.0469543	0
mature.nk.t.cell	CD8.positive..alpha.beta.T.cell	0.0461271	0
mesenchymal.stem.cell	tendon.cell	0.0430622	0
endothelial.cell.of.vascular.tree	blood.vessel.endothelial.cell	0.0390738	0
slow.muscle.cell	myelinating.Schwann.cell	0.0389838	0
tendon.cell	skeletal.muscle.fibroblast..fibroblast	0.0389344	0
cd8.positive..alpha.beta.t.cell	T.helper.17.cell	0.0380488	0
mast.cell	T.helper.17.cell	0.0377224	0
mature.nk.t.cell	myelinating.Schwann.cell	0.037229	0
slow.muscle.cell	smooth.muscle.cell	0.0371501	0
smooth.muscle.cell	myelinating.Schwann.cell	0.0363924	0
cd4.positive..alpha.beta.t.cell	T.helper.17.cell	0.0363248	0
macrophage	myelinating.Schwann.cell	0.0354147	0
endothelial.cell.of.vascular.tree	endothelial.cell.of.artery	0.0351617	0
tendon.cell	smooth.muscle.cell	0.0346955	0
mesothelial.cell	smooth.muscle.cell	0.0346855	0
endothelial.cell.of.lymphatic.vessel	vein.endothelial.cell..endothelial.stalk.cell	0.0331808	0
smooth.muscle.cell	smooth.muscle.cell	0.0329322	0
mature.nk.t.cell	B.cell	0.0328407	0
mast.cell	myelinating.Schwann.cell	0.031804	0
endothelial.cell.of.lymphatic.vessel	capillary.endothelial.cell	0.0317797	0
macrophage	T.helper.17.cell	0.029661	0
mast.cell	macrophage	0.0295434	0
endothelial.cell.of.artery	blood.vessel.endothelial.cell	0.0295119	0
mesothelial.cell	myelinating.Schwann.cell	0.0294985	0
t.cell	smooth.muscle.cell	0.0281207	0
fast.muscle.cell	myelinating.Schwann.cell	0.0279001	0
mature.nk.t.cell	smooth.muscle.cell	0.0263881	0
fast.muscle.cell	smooth.muscle.cell	0.0261476	0
mesenchymal.stem.cell	smooth.muscle.cell	0.0256012	0
endothelial.cell.of.artery	endothelial.cell.of.lymphatic.vessel	0.0254582	0
endothelial.cell.of.lymphatic.vessel	smooth.muscle.cell	0.0245399	0
macrophage	smooth.muscle.cell	0.0244167	0
mature.nk.t.cell	monocyte.derived.dendritic.cell	0.0242215	0
slow.muscle.cell	T.helper.17.cell	0.0237832	0
endothelial.cell.of.artery	smooth.muscle.cell	0.0232404	0
mature.nk.t.cell	macrophage	0.0231171	0
mast.cell	smooth.muscle.cell	0.02301	0
skeletal.muscle.satellite.stem.cell	stromal.cell	0.0225564	0
t.cell	myelinating.Schwann.cell	0.022309	0
tendon.cell	myelinating.Schwann.cell	0.0219512	0
endothelial.cell.of.artery	myelinating.Schwann.cell	0.0217984	0
mast.cell	B.cell	0.0216963	0
mesothelial.cell	skeletal.muscle.fibroblast..fibroblast.1	0.0216165	0
endothelial.cell.of.vascular.tree	endothelial.cell.of.lymphatic.vessel	0.0212235	0
macrophage	stromal.cell	0.0208488	0
skeletal.muscle.satellite.stem.cell	myelinating.Schwann.cell	0.0208206	0
mesenchymal.stem.cell	pericyte.cell	0.0208078	0
cd8.positive..alpha.beta.t.cell	B.cell	0.0206677	0
endothelial.cell.of.lymphatic.vessel	myelinating.Schwann.cell	0.0205556	0
slow.muscle.cell	pericyte.cell	0.0204082	0
skeletal.muscle.satellite.stem.cell	smooth.muscle.cell	0.0198929	0
mesothelial.cell	CD8.positive..alpha.beta.T.cell	0.0195531	0
macrophage	B.cell	0.0191235	0
mature.nk.t.cell	endothelial.cell.of.lymphatic.vessel	0.0191131	0
mesothelial.cell	skeletal.muscle.satellite.cell	0.0191022	0
mast.cell	monocyte.derived.dendritic.cell	0.0190678	0
t.cell	monocyte.derived.dendritic.cell	0.0187266	0
cd4.positive..alpha.beta.t.cell	B.cell	0.0185874	0
endothelial.cell.of.vascular.tree	capillary.endothelial.cell	0.0185644	0
macrophage	skeletal.muscle.fibroblast..fibroblast.1	0.0184409	0
capillary.endothelial.cell	myelinating.Schwann.cell	0.0184255	0
smooth.muscle.cell	T.helper.17.cell	0.0183357	0
mesenchymal.stem.cell	myelinating.Schwann.cell	0.0178242	0
smooth.muscle.cell	vein.endothelial.cell..endothelial.stalk.cell	0.017769	0
pericyte.cell	smooth.muscle.cell	0.0175879	0
endothelial.cell.of.lymphatic.vessel	stromal.cell	0.0175439	0
mast.cell	endothelial.cell.of.lymphatic.vessel	0.0173993	0
fast.muscle.cell	T.helper.17.cell	0.0173969	0
macrophage	vein.endothelial.cell..endothelial.stalk.cell	0.0173776	0
smooth.muscle.cell	striated.muscle.cell	0.0171731	0
endothelial.cell.of.lymphatic.vessel	skeletal.muscle.fibroblast..fibroblast.1	0.0171569	0
endothelial.cell.of.vascular.tree	skeletal.muscle.satellite.cell	0.0169753	0
pericyte.cell	skeletal.muscle.fibroblast..fibroblast.1	0.0168856	0
endothelial.cell.of.artery	skeletal.muscle.fibroblast..fibroblast.1	0.0163934	0
cd8.positive..alpha.beta.t.cell	smooth.muscle.cell	0.016247	0
cd8.positive..alpha.beta.t.cell	monocyte.derived.dendritic.cell	0.0161002	0
endothelial.cell.of.lymphatic.vessel	pericyte.cell	0.016016	0
macrophage	endothelial.cell.of.artery	0.0159744	0
smooth.muscle.cell	tendon.cell	0.0158228	0
smooth.muscle.cell	endothelial.cell.of.lymphatic.vessel	0.0157407	0
mesothelial.cell	stromal.cell	0.0155229	0
tendon.cell	pericyte.cell	0.0154578	0
mature.nk.t.cell	striated.muscle.cell	0.0154374	0
skeletal.muscle.satellite.stem.cell	B.cell	0.0154278	0
cd8.positive..alpha.beta.t.cell	myelinating.Schwann.cell	0.0153748	0
t.cell	blood.vessel.endothelial.cell	0.0152582	0
mature.nk.t.cell	stromal.cell	0.0150376	0
mast.cell	striated.muscle.cell	0.0150229	0
smooth.muscle.cell	endothelial.cell.of.artery	0.015	0
mast.cell	pericyte.cell	0.0149123	0
endothelial.cell.of.lymphatic.vessel	endothelial.cell.of.artery	0.0148741	0
mesothelial.cell	T.helper.17.cell	0.0148387	0
smooth.muscle.cell	stromal.cell	0.0145719	0
endothelial.cell.of.artery	pericyte.cell	0.0144509	0
mature.nk.t.cell	capillary.endothelial.cell	0.0144049	0
macrophage	endothelial.cell.of.lymphatic.vessel	0.0142322	0
macrophage	capillary.endothelial.cell	0.0141791	0
mast.cell	blood.vessel.endothelial.cell	0.0140421	0
mature.nk.t.cell	blood.vessel.endothelial.cell	0.0139803	0
capillary.endothelial.cell	endothelial.cell.of.lymphatic.vessel	0.0137858	0
macrophage	blood.vessel.endothelial.cell	0.0137429	0
pericyte.cell	skeletal.muscle.satellite.cell	0.0135922	0
fast.muscle.cell	pericyte.cell	0.0134814	0
slow.muscle.cell	B.cell	0.0134752	0
mesothelial.cell	striated.muscle.cell	0.0133576	0
endothelial.cell.of.lymphatic.vessel	tendon.cell	0.0133495	0
skeletal.muscle.satellite.stem.cell	pericyte.cell	0.0131894	0
mesothelial.cell	tendon.cell	0.012987	0
endothelial.cell.of.vascular.tree	pericyte.cell	0.0128957	0
endothelial.cell.of.artery	stromal.cell	0.0128586	0
mast.cell	capillary.endothelial.cell	0.0127042	0
smooth.muscle.cell	skeletal.muscle.fibroblast..fibroblast.1	0.012685	0
tendon.cell	endothelial.cell.of.artery	0.0125523	0
mesothelial.cell	endothelial.cell.of.lymphatic.vessel	0.0123865	0
endothelial.cell.of.vascular.tree	B.cell	0.0122616	0
capillary.endothelial.cell	smooth.muscle.cell	0.0122283	0
skeletal.muscle.satellite.stem.cell	tendon.cell	0.0121766	0
mature.nk.t.cell	endothelial.cell.of.artery	0.0121359	0
capillary.endothelial.cell	pericyte.cell	0.0121212	0
endothelial.cell.of.vascular.tree	stromal.cell	0.0121212	0
t.cell	pericyte.cell	0.012012	0
endothelial.cell.of.vascular.tree	skeletal.muscle.fibroblast..fibroblast.1	0.0119225	0
pericyte.cell	endothelial.cell.of.lymphatic.vessel	0.0118871	0
mast.cell	vein.endothelial.cell..endothelial.stalk.cell	0.0116167	0
macrophage	tendon.cell	0.0116086	0
skeletal.muscle.satellite.stem.cell	T.helper.17.cell	0.011474	0
slow.muscle.cell	capillary.endothelial.cell	0.0113941	0
t.cell	stromal.cell	0.0113285	0
endothelial.cell.of.vascular.tree	T.helper.17.cell	0.0112847	0
mesenchymal.stem.cell	skeletal.muscle.satellite.cell	0.011254	0
t.cell	vein.endothelial.cell..endothelial.stalk.cell	0.0112486	0
endothelial.cell.of.vascular.tree	smooth.muscle.cell	0.0112191	0
capillary.endothelial.cell	macrophage	0.0111789	0
mature.nk.t.cell	vein.endothelial.cell..endothelial.stalk.cell	0.0111732	0
capillary.endothelial.cell	skeletal.muscle.fibroblast..fibroblast.1	0.0111386	0
cd8.positive..alpha.beta.t.cell	stromal.cell	0.0110193	0
smooth.muscle.cell	capillary.endothelial.cell	0.0110092	0
skeletal.muscle.satellite.stem.cell	macrophage	0.0108565	0
endothelial.cell.of.vascular.tree	myelinating.Schwann.cell	0.0107914	0
cd8.positive..alpha.beta.t.cell	macrophage	0.0106952	0
slow.muscle.cell	stromal.cell	0.0106312	0
slow.muscle.cell	skeletal.muscle.satellite.cell	0.0105184	0
t.cell	endothelial.cell.of.lymphatic.vessel	0.0104712	0
endothelial.cell.of.vascular.tree	tendon.cell	0.0103397	0
mast.cell	CD8.positive..alpha.beta.T.cell	0.0103093	0
pericyte.cell	capillary.endothelial.cell	0.0103093	0
mature.nk.t.cell	pericyte.cell	0.0102564	0
skeletal.muscle.satellite.stem.cell	skeletal.muscle.fibroblast..fibroblast	0.010142	0
endothelial.cell.of.artery	skeletal.muscle.fibroblast..fibroblast	0.0100143	0
cd8.positive..alpha.beta.t.cell	endothelial.cell.of.lymphatic.vessel	0.00985915	0
mast.cell	endothelial.cell.of.artery	0.00981354	0
pericyte.cell	myelinating.Schwann.cell	0.00977836	0
mesenchymal.stem.cell	macrophage	0.00976801	0
smooth.muscle.cell	skeletal.muscle.satellite.cell	0.00968784	0
cd4.positive..alpha.beta.t.cell	capillary.endothelial.cell	0.0096463	0
mesothelial.cell	vein.endothelial.cell..endothelial.stalk.cell	0.00957354	0
macrophage	striated.muscle.cell	0.00955056	0
mesothelial.cell	pericyte.cell	0.00952381	0
cd4.positive..alpha.beta.t.cell	stromal.cell	0.00946372	0
fast.muscle.cell	skeletal.muscle.satellite.cell	0.00940734	0
slow.muscle.cell	endothelial.cell.of.lymphatic.vessel	0.00939597	0
macrophage	pericyte.cell	0.00937275	0
endothelial.cell.of.lymphatic.vessel	blood.vessel.endothelial.cell	0.00929152	0
endothelial.cell.of.vascular.tree	monocyte.derived.dendritic.cell	0.00904977	0
t.cell	macrophage	0.00904523	0
mesothelial.cell	capillary.endothelial.cell	0.00901639	0
endothelial.cell.of.lymphatic.vessel	macrophage	0.00900901	0
skeletal.muscle.satellite.stem.cell	striated.muscle.cell	0.00893582	0
cd4.positive..alpha.beta.t.cell	myelinating.Schwann.cell	0.00879567	0
pericyte.cell	blood.vessel.endothelial.cell	0.00868056	0
endothelial.cell.of.artery	macrophage	0.00867888	0
pericyte.cell	stromal.cell	0.00867052	0
skeletal.muscle.satellite.stem.cell	blood.vessel.endothelial.cell	0.00865801	0
t.cell	striated.muscle.cell	0.00859599	0
mesenchymal.stem.cell	endothelial.cell.of.artery	0.00857143	0
cd4.positive..alpha.beta.t.cell	monocyte.derived.dendritic.cell	0.00851064	0
slow.muscle.cell	endothelial.cell.of.artery	0.00851064	0
endothelial.cell.of.lymphatic.vessel	T.helper.17.cell	0.00842912	0
pericyte.cell	endothelial.cell.of.artery	0.00841751	0
t.cell	capillary.endothelial.cell	0.00831601	0
capillary.endothelial.cell	stromal.cell	0.00829016	0
endothelial.cell.of.artery	T.helper.17.cell	0.00819062	0
smooth.muscle.cell	blood.vessel.endothelial.cell	0.00808898	0
endothelial.cell.of.artery	tendon.cell	0.00808314	0
endothelial.cell.of.artery	CD8.positive..alpha.beta.T.cell	0.00805524	0
capillary.endothelial.cell	B.cell	0.00800915	0
mesothelial.cell	macrophage	0.00796813	0
mesothelial.cell	endothelial.cell.of.artery	0.00792952	0
mesenchymal.stem.cell	monocyte.derived.dendritic.cell	0.00788644	0
cd8.positive..alpha.beta.t.cell	striated.muscle.cell	0.00781929	0
cd8.positive..alpha.beta.t.cell	vein.endothelial.cell..endothelial.stalk.cell	0.00773994	0
erythrocyte	striated.muscle.cell	0.00769231	0
skeletal.muscle.satellite.stem.cell	skeletal.muscle.fibroblast..fibroblast.1	0.00763359	0
mesothelial.cell	skeletal.muscle.fibroblast..fibroblast	0.00762527	0
skeletal.muscle.satellite.stem.cell	CD8.positive..alpha.beta.T.cell	0.00754148	0
t.cell	skeletal.muscle.satellite.cell	0.0075	0
tendon.cell	endothelial.cell.of.lymphatic.vessel	0.0074813	0
tendon.cell	capillary.endothelial.cell	0.00743494	0
mast.cell	skeletal.muscle.satellite.cell	0.00740741	0
pericyte.cell	tendon.cell	0.00736648	0
fast.muscle.cell	capillary.endothelial.cell	0.00732899	0
cd8.positive..alpha.beta.t.cell	skeletal.muscle.satellite.cell	0.00722022	0
mast.cell	tendon.cell	0.00721649	0
tendon.cell	macrophage	0.00713436	0
fast.muscle.cell	blood.vessel.endothelial.cell	0.00711744	0
mesothelial.cell	B.cell	0.00699913	0
tendon.cell	T.helper.17.cell	0.00697472	0
cd8.positive..alpha.beta.t.cell	capillary.endothelial.cell	0.0069735	0
fast.muscle.cell	B.cell	0.00696258	0
cd4.positive..alpha.beta.t.cell	smooth.muscle.cell	0.00696258	0
macrophage	skeletal.muscle.fibroblast..fibroblast	0.00669216	0
cd8.positive..alpha.beta.t.cell	pericyte.cell	0.00659631	0
macrophage	CD8.positive..alpha.beta.T.cell	0.00658436	0
fast.muscle.cell	endothelial.cell.of.lymphatic.vessel	0.00653595	0
slow.muscle.cell	macrophage	0.00652316	0
endothelial.cell.of.vascular.tree	striated.muscle.cell	0.00638468	0
smooth.muscle.cell	skeletal.muscle.fibroblast..fibroblast	0.00632111	0
skeletal.muscle.satellite.stem.cell	endothelial.cell.of.lymphatic.vessel	0.00629723	0
skeletal.muscle.satellite.stem.cell	capillary.endothelial.cell	0.00625782	0
mesothelial.cell	blood.vessel.endothelial.cell	0.00625559	0
mast.cell	stromal.cell	0.00624442	0
cd4.positive..alpha.beta.t.cell	skeletal.muscle.fibroblast..fibroblast.1	0.00623701	0
capillary.endothelial.cell	monocyte.derived.dendritic.cell	0.00623441	0
smooth.muscle.cell	macrophage	0.00620018	0
capillary.endothelial.cell	T.helper.17.cell	0.00617761	0
endothelial.cell.of.lymphatic.vessel	monocyte.derived.dendritic.cell	0.00613497	0
fast.muscle.cell	endothelial.cell.of.artery	0.00612423	0
cd4.positive..alpha.beta.t.cell	macrophage	0.00607903	0
erythrocyte	myelinating.Schwann.cell	0.005997	0
macrophage	skeletal.muscle.satellite.cell	0.00589226	0
slow.muscle.cell	blood.vessel.endothelial.cell	0.00573066	0
t.cell	endothelial.cell.of.artery	0.00569476	0
fast.muscle.cell	stromal.cell	0.00563607	0
skeletal.muscle.satellite.stem.cell	endothelial.cell.of.artery	0.0056101	0
mesenchymal.stem.cell	vein.endothelial.cell..endothelial.stalk.cell	0.00557103	0
fast.muscle.cell	macrophage	0.00553797	0
fast.muscle.cell	tendon.cell	0.00549451	0
pericyte.cell	CD8.positive..alpha.beta.T.cell	0.00548446	0
endothelial.cell.of.artery	B.cell	0.00539374	0
mesenchymal.stem.cell	T.helper.17.cell	0.00531444	0
pericyte.cell	skeletal.muscle.fibroblast..fibroblast	0.00529101	0
mast.cell	skeletal.muscle.fibroblast..fibroblast.1	0.00517063	0
erythrocyte	endothelial.cell.of.artery	0.00512821	0
capillary.endothelial.cell	skeletal.muscle.satellite.cell	0.00504414	0
erythrocyte	B.cell	0.00503778	0
mature.nk.t.cell	tendon.cell	0.00502934	0
capillary.endothelial.cell	tendon.cell	0.00488998	0
endothelial.cell.of.artery	striated.muscle.cell	0.004851	0
endothelial.cell.of.vascular.tree	macrophage	0.00468933	0
endothelial.cell.of.artery	monocyte.derived.dendritic.cell	0.00468384	0
tendon.cell	skeletal.muscle.satellite.cell	0.00464396	0
fast.muscle.cell	monocyte.derived.dendritic.cell	0.00463822	0
cd4.positive..alpha.beta.t.cell	pericyte.cell	0.0045045	0
endothelial.cell.of.lymphatic.vessel	B.cell	0.00449438	0
mesenchymal.stem.cell	blood.vessel.endothelial.cell	0.00437956	0
cd4.positive..alpha.beta.t.cell	skeletal.muscle.satellite.cell	0.004329	0
endothelial.cell.of.lymphatic.vessel	striated.muscle.cell	0.00426743	0
tendon.cell	blood.vessel.endothelial.cell	0.00425532	0
erythrocyte	endothelial.cell.of.lymphatic.vessel	0.00423729	0
erythrocyte	capillary.endothelial.cell	0.00419287	0
pericyte.cell	macrophage	0.0041841	0
tendon.cell	B.cell	0.00410959	0
mesenchymal.stem.cell	striated.muscle.cell	0.0040783	0
tendon.cell	vein.endothelial.cell..endothelial.stalk.cell	0.00405954	0
smooth.muscle.cell	B.cell	0.00392927	0
erythrocyte	macrophage	0.00391389	0
cd4.positive..alpha.beta.t.cell	blood.vessel.endothelial.cell	0.00383877	0
mesenchymal.stem.cell	capillary.endothelial.cell	0.00379747	0
pericyte.cell	monocyte.derived.dendritic.cell	0.00377358	0
slow.muscle.cell	skeletal.muscle.fibroblast..fibroblast.1	0.00367647	0
fast.muscle.cell	skeletal.muscle.fibroblast..fibroblast.1	0.00367309	0
slow.muscle.cell	tendon.cell	0.003663	0
cd4.positive..alpha.beta.t.cell	vein.endothelial.cell..endothelial.stalk.cell	0.0036036	0
endothelial.cell.of.artery	skeletal.muscle.satellite.cell	0.0035503	0
mature.nk.t.cell	skeletal.muscle.satellite.cell	0.0034188	0
pericyte.cell	B.cell	0.00331126	0
pericyte.cell	vein.endothelial.cell..endothelial.stalk.cell	0.00326264	0
cd8.positive..alpha.beta.t.cell	blood.vessel.endothelial.cell	0.00325203	0
tendon.cell	striated.muscle.cell	0.0032077	0
erythrocyte	skeletal.muscle.satellite.cell	0.00318471	0
smooth.muscle.cell	CD8.positive..alpha.beta.T.cell	0.00311526	0
skeletal.muscle.satellite.stem.cell	monocyte.derived.dendritic.cell	0.00308642	0
capillary.endothelial.cell	skeletal.muscle.fibroblast..fibroblast	0.00306279	0
endothelial.cell.of.lymphatic.vessel	skeletal.muscle.fibroblast..fibroblast	0.003003	0
slow.muscle.cell	monocyte.derived.dendritic.cell	0.00296077	0
pericyte.cell	T.helper.17.cell	0.00292683	0
capillary.endothelial.cell	striated.muscle.cell	0.00286738	0
skeletal.muscle.satellite.stem.cell	vein.endothelial.cell..endothelial.stalk.cell	0.00273598	0
erythrocyte	blood.vessel.endothelial.cell	0.00268097	0
mature.nk.t.cell	skeletal.muscle.fibroblast..fibroblast.1	0.00251889	0
endothelial.cell.of.lymphatic.vessel	skeletal.muscle.satellite.cell	0.00247525	0
t.cell	skeletal.muscle.fibroblast..fibroblast.1	0.00242718	0
endothelial.cell.of.lymphatic.vessel	CD8.positive..alpha.beta.T.cell	0.00239234	0
slow.muscle.cell	CD8.positive..alpha.beta.T.cell	0.00218978	0
fast.muscle.cell	skeletal.muscle.fibroblast..fibroblast	0.00215285	0
smooth.muscle.cell	monocyte.derived.dendritic.cell	0.00211416	0
erythrocyte	stromal.cell	0.00204082	0
erythrocyte	smooth.muscle.cell	0.00198807	0
endothelial.cell.of.vascular.tree	skeletal.muscle.fibroblast..fibroblast	0.00193798	0
erythrocyte	pericyte.cell	0.00192678	0
mesothelial.cell	monocyte.derived.dendritic.cell	0.00186047	0
cd4.positive..alpha.beta.t.cell	endothelial.cell.of.artery	0.00185185	0
cd8.positive..alpha.beta.t.cell	skeletal.muscle.fibroblast..fibroblast.1	0.0017331	0
cd4.positive..alpha.beta.t.cell	endothelial.cell.of.lymphatic.vessel	0.00160772	0
mesenchymal.stem.cell	CD8.positive..alpha.beta.T.cell	0.00152439	0
tendon.cell	CD8.positive..alpha.beta.T.cell	0.00147929	0
endothelial.cell.of.vascular.tree	CD8.positive..alpha.beta.T.cell	0.00145773	0
mesenchymal.stem.cell	B.cell	0.00140449	0
slow.muscle.cell	vein.endothelial.cell..endothelial.stalk.cell	0.00139276	0
mesenchymal.stem.cell	endothelial.cell.of.lymphatic.vessel	0.00127065	0
erythrocyte	T.helper.17.cell	0.00121951	0
capillary.endothelial.cell	CD8.positive..alpha.beta.T.cell	0.00121359	0
cd4.positive..alpha.beta.t.cell	striated.muscle.cell	0.000938967	0
fast.muscle.cell	CD8.positive..alpha.beta.T.cell	0.000909091	0
pericyte.cell	striated.muscle.cell	0.000890472	0
fast.muscle.cell	vein.endothelial.cell..endothelial.stalk.cell	0.000858369	0
slow.muscle.cell	skeletal.muscle.fibroblast..fibroblast	0.000831947	0
erythrocyte	monocyte.derived.dendritic.cell	0	0
tendon.cell	monocyte.derived.dendritic.cell	0	0
erythrocyte	CD8.positive..alpha.beta.T.cell	0	0
erythrocyte	vein.endothelial.cell..endothelial.stalk.cell	0	0
cd8.positive..alpha.beta.t.cell	endothelial.cell.of.artery	0	0
cd4.positive..alpha.beta.t.cell	tendon.cell	0	0
cd8.positive..alpha.beta.t.cell	tendon.cell	0	0
erythrocyte	tendon.cell	0	0
t.cell	tendon.cell	0	0
cd4.positive..alpha.beta.t.cell	skeletal.muscle.fibroblast..fibroblast	0	0
cd8.positive..alpha.beta.t.cell	skeletal.muscle.fibroblast..fibroblast	0	0
erythrocyte	skeletal.muscle.fibroblast..fibroblast	0	0
mast.cell	skeletal.muscle.fibroblast..fibroblast	0	0
mature.nk.t.cell	skeletal.muscle.fibroblast..fibroblast	0	0
t.cell	skeletal.muscle.fibroblast..fibroblast	0	0
erythrocyte	skeletal.muscle.fibroblast..fibroblast.1	0	0

## Sheet: Spleen
Supplementary File 5D. Matching cell types between human and mouse in spleen.
Human cell type	Mouse cell type	matchSCore2 score	Matching cell types (1=Yes, 0=No)
cd8.positive..alpha.beta.t.cell	mesenchymal.stem.cell	0.21028	1
plasma.cell	T1.B.cell	0.123457	1
hematopoietic.stem.cell	mesenchymal.stem.cell	0.102617	1
naive.b.cell	marginal.zone.B.cell.of.spleen	0.0972973	1
memory.b.cell	marginal.zone.B.cell.of.spleen	0.0948276	1
neutrophil	macrophage	0.0822281	1
plasmacytoid.dendritic.cell	T1.B.cell	0.0777502	1
classical.monocyte	macrophage	0.0674419	1
endothelial.cell	epithelial.cell	0.0620667	1
intermediate.monocyte	macrophage	0.0564149	1
macrophage	plasmacytoid.dendritic.cell	0.0534717	1
regulatory.t.cell	activated.CD4.positive..alpha.beta.T.cell	0.0534125	1
macrophage	macrophage	0.0529801	1
neutrophil	epithelial.cell	0.0520887	1
platelet	epithelial.cell	0.051937	1
macrophage	follicular.B.cell	0.0515337	1
plasmacytoid.dendritic.cell	mesenchymal.stem.cell	0.0491174	0
cd141.positive.myeloid.dendritic.cell	conventional.dendritic.cell	0.0478261	0
naive.thymus.derived.cd4.positive..alpha.beta.t.cell	naive.thymus.derived.CD4.positive..alpha.beta.T.cell	0.0462963	0
nk.cell	natural.killer.cell	0.0406015	0
cd141.positive.myeloid.dendritic.cell	monocyte	0.0387097	0
cd1c.positive.myeloid.dendritic.cell	mesenchymal.stem.cell	0.0359223	0
cd8.positive..alpha.beta.memory.t.cell	naive.thymus.derived.CD8.positive..alpha.beta.T.cell	0.0357143	0
platelet	macrophage	0.0356426	0
platelet	plasmacytoid.dendritic.cell	0.0353114	0
hematopoietic.stem.cell	epithelial.cell	0.0333333	0
endothelial.cell	plasmacytoid.dendritic.cell	0.0317804	0
cd1c.positive.myeloid.dendritic.cell	conventional.dendritic.cell	0.0311891	0
endothelial.cell	T1.B.cell	0.0291607	0
macrophage	conventional.dendritic.cell	0.0291375	0
innate.lymphoid.cell	mature.NK.T.cell	0.0282209	0
intermediate.monocyte	plasmacytoid.dendritic.cell	0.0280612	0
erythrocyte	mesenchymal.stem.cell	0.0279851	0
platelet	T1.B.cell	0.0272597	0
type.i.nk.t.cell	natural.killer.cell	0.0272374	0
intermediate.monocyte	epithelial.cell	0.0268325	0
neutrophil	natural.killer.cell	0.0259644	0
platelet	natural.killer.cell	0.0254381	0
mature.nk.t.cell	natural.killer.cell	0.0252918	0
classical.monocyte	monocyte	0.0251451	0
plasmacytoid.dendritic.cell	plasmacytoid.dendritic.cell	0.0251012	0
macrophage	epithelial.cell	0.0250153	0
neutrophil	plasmacytoid.dendritic.cell	0.0250153	0
cd4.positive..alpha.beta.memory.t.cell	naive.thymus.derived.CD4.positive..alpha.beta.T.cell	0.025	0
hematopoietic.stem.cell	T1.B.cell	0.0246667	0
macrophage	monocyte	0.0243337	0
innate.lymphoid.cell	epithelial.cell	0.0240964	0
hematopoietic.stem.cell	plasmacytoid.dendritic.cell	0.0238908	0
intermediate.monocyte	T1.B.cell	0.0238291	0
erythrocyte	T1.B.cell	0.0236686	0
endothelial.cell	macrophage	0.0233151	0
naive.b.cell	plasmacytoid.dendritic.cell	0.0233074	0
naive.thymus.derived.cd8.positive..alpha.beta.t.cell	natural.killer.cell	0.0232068	0
cd8.positive..alpha.beta.t.cell	epithelial.cell	0.0227048	0
cd141.positive.myeloid.dendritic.cell	macrophage	0.0223005	0
classical.monocyte	plasmacytoid.dendritic.cell	0.0222222	0
neutrophil	T1.B.cell	0.0220238	0
erythrocyte	epithelial.cell	0.0217718	0
cd8.positive..alpha.beta.t.cell	plasmacytoid.dendritic.cell	0.0214797	0
intermediate.monocyte	natural.killer.cell	0.0212766	0
cd1c.positive.myeloid.dendritic.cell	plasmacytoid.dendritic.cell	0.0211416	0
neutrophil	follicular.B.cell	0.0209732	0
nk.cell	macrophage	0.0206074	0
cd8.positive..alpha.beta.t.cell	T1.B.cell	0.0204201	0
cd141.positive.myeloid.dendritic.cell	plasmacytoid.dendritic.cell	0.0199778	0
cd141.positive.myeloid.dendritic.cell	epithelial.cell	0.0199362	0
classical.monocyte	T1.B.cell	0.0193089	0
classical.monocyte	epithelial.cell	0.019216	0
type.i.nk.t.cell	activated.CD4.positive..alpha.beta.T.cell	0.0191083	0
nk.cell	activated.CD4.positive..alpha.beta.T.cell	0.0189474	0
cd8.positive..alpha.beta.memory.t.cell	CD8.positive..alpha.beta.memory.T.cell	0.0188679	0
cd8.positive..alpha.beta.t.cell	natural.killer.cell	0.0187185	0
neutrophil	monocyte	0.0180033	0
plasma.cell	mesenchymal.stem.cell	0.0177638	0
mature.nk.t.cell	CD8.positive..alpha.beta.memory.T.cell	0.0176991	0
plasmacytoid.dendritic.cell	epithelial.cell	0.0175219	0
nk.cell	epithelial.cell	0.0173454	0
classical.monocyte	conventional.dendritic.cell	0.0173077	0
macrophage	T1.B.cell	0.0172414	0
intermediate.monocyte	monocyte	0.0171053	0
nk.cell	mature.NK.T.cell	0.0170279	0
platelet	mesenchymal.stem.cell	0.0165441	0
type.i.nk.t.cell	mature.NK.T.cell	0.0164948	0
regulatory.t.cell	macrophage	0.0162703	0
erythrocyte	plasmacytoid.dendritic.cell	0.0162437	0
cd1c.positive.myeloid.dendritic.cell	T1.B.cell	0.0162107	0
mature.nk.t.cell	activated.CD4.positive..alpha.beta.T.cell	0.0159236	0
neutrophil	conventional.dendritic.cell	0.0155229	0
nk.cell	plasmacytoid.dendritic.cell	0.0154004	0
cd1c.positive.myeloid.dendritic.cell	epithelial.cell	0.0153139	0
platelet	mature.NK.T.cell	0.0148317	0
regulatory.t.cell	naive.thymus.derived.CD4.positive..alpha.beta.T.cell	0.0147601	0
innate.lymphoid.cell	plasmacytoid.dendritic.cell	0.0147441	0
cd8.positive..alpha.beta.memory.t.cell	activated.CD4.positive..alpha.beta.T.cell	0.0141844	0
classical.monocyte	follicular.B.cell	0.0141129	0
endothelial.cell	natural.killer.cell	0.0138614	0
naive.thymus.derived.cd4.positive..alpha.beta.t.cell	mature.NK.T.cell	0.0138504	0
platelet	conventional.dendritic.cell	0.0133172	0
hematopoietic.stem.cell	macrophage	0.0132589	0
cd141.positive.myeloid.dendritic.cell	natural.killer.cell	0.0130293	0
nk.cell	monocyte	0.0128205	0
neutrophil	mature.NK.T.cell	0.0127724	0
cd4.positive..alpha.beta.memory.t.cell	activated.CD4.positive..alpha.beta.T.cell	0.0125	0
mature.nk.t.cell	mature.NK.T.cell	0.0123457	0
cd1c.positive.myeloid.dendritic.cell	natural.killer.cell	0.0121029	0
endothelial.cell	mature.NK.T.cell	0.012024	0
macrophage	natural.killer.cell	0.0118694	0
innate.lymphoid.cell	T1.B.cell	0.0117351	0
cd8.positive..alpha.beta.t.cell	mature.NK.T.cell	0.0117302	0
platelet	follicular.B.cell	0.0116636	0
innate.lymphoid.cell	natural.killer.cell	0.0115875	0
regulatory.t.cell	mature.NK.T.cell	0.0114943	0
cd1c.positive.myeloid.dendritic.cell	monocyte	0.0114504	0
cd1c.positive.myeloid.dendritic.cell	marginal.zone.B.cell.of.spleen	0.011236	0
mature.nk.t.cell	follicular.B.cell	0.0112045	0
innate.lymphoid.cell	monocyte	0.0110193	0
regulatory.t.cell	plasmacytoid.dendritic.cell	0.0105758	0
cd141.positive.myeloid.dendritic.cell	T1.B.cell	0.0105708	0
type.i.nk.t.cell	T1.B.cell	0.010551	0
naive.thymus.derived.cd4.positive..alpha.beta.t.cell	activated.CD4.positive..alpha.beta.T.cell	0.0104712	0
intermediate.monocyte	mature.NK.T.cell	0.0103687	0
platelet	monocyte	0.0102533	0
cd141.positive.myeloid.dendritic.cell	mesenchymal.stem.cell	0.00990099	0
endothelial.cell	monocyte	0.00959133	0
cd8.positive..alpha.beta.memory.t.cell	mature.NK.T.cell	0.00958466	0
erythrocyte	macrophage	0.0095339	0
regulatory.t.cell	monocyte	0.00952381	0
naive.b.cell	T1.B.cell	0.00947368	0
intermediate.monocyte	follicular.B.cell	0.00947226	0
naive.thymus.derived.cd4.positive..alpha.beta.t.cell	naive.thymus.derived.CD8.positive..alpha.beta.T.cell	0.00934579	0
cd8.positive..alpha.beta.t.cell	activated.CD4.positive..alpha.beta.T.cell	0.00919732	0
intermediate.monocyte	conventional.dendritic.cell	0.00915033	0
innate.lymphoid.cell	activated.CD4.positive..alpha.beta.T.cell	0.0091047	0
cd8.positive..alpha.beta.t.cell	macrophage	0.00909642	0
classical.monocyte	natural.killer.cell	0.00904977	0
cd4.positive..alpha.beta.memory.t.cell	mature.NK.T.cell	0.00903614	0
naive.thymus.derived.cd8.positive..alpha.beta.t.cell	mature.NK.T.cell	0.00896861	0
nk.cell	T1.B.cell	0.00884956	0
cd1c.positive.myeloid.dendritic.cell	macrophage	0.00879121	0
cd8.positive..alpha.beta.memory.t.cell	natural.killer.cell	0.00862069	0
naive.thymus.derived.cd4.positive..alpha.beta.t.cell	epithelial.cell	0.0085796	0
mature.nk.t.cell	epithelial.cell	0.00851789	0
hematopoietic.stem.cell	natural.killer.cell	0.00838223	0
type.i.nk.t.cell	follicular.B.cell	0.00835655	0
regulatory.t.cell	epithelial.cell	0.00826446	0
innate.lymphoid.cell	macrophage	0.00808625	0
cd1c.positive.myeloid.dendritic.cell	follicular.B.cell	0.00801603	0
cd1c.positive.myeloid.dendritic.cell	mature.NK.T.cell	0.00794913	0
cd8.positive..alpha.beta.t.cell	conventional.dendritic.cell	0.00790514	0
regulatory.t.cell	T1.B.cell	0.00786517	0
memory.b.cell	plasmacytoid.dendritic.cell	0.0078534	0
hematopoietic.stem.cell	mature.NK.T.cell	0.00776531	0
intermediate.monocyte	mesenchymal.stem.cell	0.00769231	0
nk.cell	follicular.B.cell	0.00766284	0
memory.b.cell	T1.B.cell	0.00749064	0
mature.nk.t.cell	plasmacytoid.dendritic.cell	0.00733496	0
naive.thymus.derived.cd8.positive..alpha.beta.t.cell	activated.CD4.positive..alpha.beta.T.cell	0.00727273	0
endothelial.cell	mesenchymal.stem.cell	0.00715015	0
regulatory.t.cell	conventional.dendritic.cell	0.00714286	0
macrophage	mature.NK.T.cell	0.00713558	0
plasma.cell	conventional.dendritic.cell	0.00692841	0
neutrophil	marginal.zone.B.cell.of.spleen	0.00692042	0
innate.lymphoid.cell	conventional.dendritic.cell	0.00686813	0
naive.thymus.derived.cd8.positive..alpha.beta.t.cell	macrophage	0.00685871	0
endothelial.cell	activated.CD4.positive..alpha.beta.T.cell	0.00684932	0
plasmacytoid.dendritic.cell	marginal.zone.B.cell.of.spleen	0.00671141	0
plasmacytoid.dendritic.cell	macrophage	0.00661157	0
plasma.cell	epithelial.cell	0.00653061	0
type.i.nk.t.cell	macrophage	0.00647668	0
macrophage	mesenchymal.stem.cell	0.00637394	0
endothelial.cell	follicular.B.cell	0.00630517	0
macrophage	marginal.zone.B.cell.of.spleen	0.00625782	0
endothelial.cell	conventional.dendritic.cell	0.00623701	0
naive.b.cell	conventional.dendritic.cell	0.00622407	0
naive.thymus.derived.cd8.positive..alpha.beta.t.cell	epithelial.cell	0.0061674	0
type.i.nk.t.cell	plasmacytoid.dendritic.cell	0.00609756	0
erythrocyte	activated.CD4.positive..alpha.beta.T.cell	0.00608519	0
hematopoietic.stem.cell	activated.CD4.positive..alpha.beta.T.cell	0.00606673	0
memory.b.cell	conventional.dendritic.cell	0.0060423	0
erythrocyte	mature.NK.T.cell	0.00601504	0
regulatory.t.cell	marginal.zone.B.cell.of.spleen	0.00584795	0
naive.thymus.derived.cd4.positive..alpha.beta.t.cell	plasmacytoid.dendritic.cell	0.00576369	0
naive.b.cell	macrophage	0.00575374	0
erythrocyte	natural.killer.cell	0.00571429	0
innate.lymphoid.cell	follicular.B.cell	0.0056899	0
hematopoietic.stem.cell	conventional.dendritic.cell	0.00567644	0
hematopoietic.stem.cell	monocyte	0.00567108	0
plasma.cell	mature.NK.T.cell	0.00557621	0
memory.b.cell	macrophage	0.00557103	0
naive.b.cell	epithelial.cell	0.0054902	0
naive.thymus.derived.cd4.positive..alpha.beta.t.cell	T1.B.cell	0.00547196	0
mature.nk.t.cell	mesenchymal.stem.cell	0.00543478	0
plasmacytoid.dendritic.cell	mature.NK.T.cell	0.00538213	0
regulatory.t.cell	natural.killer.cell	0.00535714	0
erythrocyte	conventional.dendritic.cell	0.00534759	0
naive.thymus.derived.cd8.positive..alpha.beta.t.cell	naive.thymus.derived.CD8.positive..alpha.beta.T.cell	0.0052356	0
plasmacytoid.dendritic.cell	natural.killer.cell	0.00518672	0
innate.lymphoid.cell	naive.thymus.derived.CD4.positive..alpha.beta.T.cell	0.00515464	0
naive.thymus.derived.cd8.positive..alpha.beta.t.cell	plasmacytoid.dendritic.cell	0.00514139	0
cd141.positive.myeloid.dendritic.cell	mature.NK.T.cell	0.00513699	0
naive.thymus.derived.cd8.positive..alpha.beta.t.cell	naive.thymus.derived.CD4.positive..alpha.beta.T.cell	0.00510204	0
neutrophil	mesenchymal.stem.cell	0.00507901	0
platelet	marginal.zone.B.cell.of.spleen	0.00504096	0
cd141.positive.myeloid.dendritic.cell	marginal.zone.B.cell.of.spleen	0.00498753	0
cd4.positive..alpha.beta.memory.t.cell	follicular.B.cell	0.00492611	0
plasma.cell	macrophage	0.00487211	0
plasmacytoid.dendritic.cell	conventional.dendritic.cell	0.00484848	0
naive.b.cell	activated.CD4.positive..alpha.beta.T.cell	0.00481928	0
classical.monocyte	mature.NK.T.cell	0.00475436	0
innate.lymphoid.cell	mesenchymal.stem.cell	0.00474308	0
plasma.cell	monocyte	0.0045977	0
memory.b.cell	mature.NK.T.cell	0.00458716	0
cd141.positive.myeloid.dendritic.cell	follicular.B.cell	0.00440529	0
cd4.positive..alpha.beta.memory.t.cell	conventional.dendritic.cell	0.00436681	0
classical.monocyte	activated.CD4.positive..alpha.beta.T.cell	0.0043573	0
type.i.nk.t.cell	CD8.positive..alpha.beta.memory.T.cell	0.00434783	0
endothelial.cell	marginal.zone.B.cell.of.spleen	0.00429	0
cd4.positive..alpha.beta.memory.t.cell	T1.B.cell	0.0042796	0
intermediate.monocyte	activated.CD4.positive..alpha.beta.T.cell	0.0042796	0
neutrophil	activated.CD4.positive..alpha.beta.T.cell	0.0042735	0
mature.nk.t.cell	naive.thymus.derived.CD4.positive..alpha.beta.T.cell	0.00420168	0
naive.b.cell	monocyte	0.00413223	0
plasmacytoid.dendritic.cell	activated.CD4.positive..alpha.beta.T.cell	0.00395778	0
cd8.positive..alpha.beta.t.cell	monocyte	0.00393391	0
mature.nk.t.cell	macrophage	0.00388098	0
naive.thymus.derived.cd4.positive..alpha.beta.t.cell	conventional.dendritic.cell	0.00384615	0
memory.b.cell	activated.CD4.positive..alpha.beta.T.cell	0.00378788	0
plasmacytoid.dendritic.cell	follicular.B.cell	0.00375	0
erythrocyte	follicular.B.cell	0.00373134	0
regulatory.t.cell	naive.thymus.derived.CD8.positive..alpha.beta.T.cell	0.00371747	0
macrophage	activated.CD4.positive..alpha.beta.T.cell	0.00369458	0
naive.thymus.derived.cd8.positive..alpha.beta.t.cell	T1.B.cell	0.00367647	0
nk.cell	conventional.dendritic.cell	0.00363636	0
plasmacytoid.dendritic.cell	monocyte	0.00362757	0
erythrocyte	monocyte	0.0035524	0
plasma.cell	plasmacytoid.dendritic.cell	0.00344828	0
naive.b.cell	mature.NK.T.cell	0.00340136	0
type.i.nk.t.cell	epithelial.cell	0.00338696	0
mature.nk.t.cell	marginal.zone.B.cell.of.spleen	0.00325733	0
naive.b.cell	natural.killer.cell	0.00321027	0
naive.thymus.derived.cd8.positive..alpha.beta.t.cell	follicular.B.cell	0.00314465	0
innate.lymphoid.cell	marginal.zone.B.cell.of.spleen	0.00306748	0
hematopoietic.stem.cell	marginal.zone.B.cell.of.spleen	0.0030581	0
cd141.positive.myeloid.dendritic.cell	naive.thymus.derived.CD8.positive..alpha.beta.T.cell	0.00304878	0
memory.b.cell	monocyte	0.003003	0
naive.b.cell	naive.thymus.derived.CD4.positive..alpha.beta.T.cell	0.00297619	0
hematopoietic.stem.cell	follicular.B.cell	0.00290135	0
naive.thymus.derived.cd8.positive..alpha.beta.t.cell	monocyte	0.00289855	0
intermediate.monocyte	marginal.zone.B.cell.of.spleen	0.00289436	0
plasma.cell	marginal.zone.B.cell.of.spleen	0.00280899	0
nk.cell	mesenchymal.stem.cell	0.00275989	0
cd4.positive..alpha.beta.memory.t.cell	natural.killer.cell	0.00271003	0
memory.b.cell	epithelial.cell	0.00266193	0
endothelial.cell	naive.thymus.derived.CD4.positive..alpha.beta.T.cell	0.00264784	0
mature.nk.t.cell	conventional.dendritic.cell	0.00259067	0
mature.nk.t.cell	monocyte	0.00258398	0
type.i.nk.t.cell	conventional.dendritic.cell	0.00258398	0
type.i.nk.t.cell	monocyte	0.00257732	0
nk.cell	CD8.positive..alpha.beta.memory.T.cell	0.00253807	0
regulatory.t.cell	follicular.B.cell	0.00252525	0
nk.cell	naive.thymus.derived.CD4.positive..alpha.beta.T.cell	0.00248139	0
erythrocyte	CD8.positive..alpha.beta.memory.T.cell	0.00246305	0
plasma.cell	follicular.B.cell	0.00244499	0
mature.nk.t.cell	T1.B.cell	0.00232829	0
memory.b.cell	mesenchymal.stem.cell	0.0023015	0
naive.thymus.derived.cd8.positive..alpha.beta.t.cell	mesenchymal.stem.cell	0.00227015	0
classical.monocyte	marginal.zone.B.cell.of.spleen	0.00222717	0
hematopoietic.stem.cell	CD8.positive..alpha.beta.memory.T.cell	0.00221239	0
nk.cell	marginal.zone.B.cell.of.spleen	0.00211864	0
regulatory.t.cell	mesenchymal.stem.cell	0.00208551	0
erythrocyte	marginal.zone.B.cell.of.spleen	0.00206612	0
naive.b.cell	mesenchymal.stem.cell	0.00195886	0
cd4.positive..alpha.beta.memory.t.cell	epithelial.cell	0.00195122	0
classical.monocyte	mesenchymal.stem.cell	0.00187793	0
platelet	activated.CD4.positive..alpha.beta.T.cell	0.00187149	0
neutrophil	naive.thymus.derived.CD4.positive..alpha.beta.T.cell	0.00182983	0
endothelial.cell	naive.thymus.derived.CD8.positive..alpha.beta.T.cell	0.00176757	0
plasma.cell	natural.killer.cell	0.00173913	0
innate.lymphoid.cell	CD8.positive..alpha.beta.memory.T.cell	0.00173913	0
innate.lymphoid.cell	naive.thymus.derived.CD8.positive..alpha.beta.T.cell	0.00172712	0
cd8.positive..alpha.beta.memory.t.cell	macrophage	0.00166945	0
cd8.positive..alpha.beta.memory.t.cell	plasmacytoid.dendritic.cell	0.0015456	0
naive.thymus.derived.cd4.positive..alpha.beta.t.cell	macrophage	0.00154083	0
plasmacytoid.dendritic.cell	naive.thymus.derived.CD4.positive..alpha.beta.T.cell	0.00147059	0
macrophage	naive.thymus.derived.CD8.positive..alpha.beta.T.cell	0.00137174	0
cd8.positive..alpha.beta.memory.t.cell	mesenchymal.stem.cell	0.0013369	0
endothelial.cell	CD8.positive..alpha.beta.memory.T.cell	0.00132743	0
platelet	naive.thymus.derived.CD8.positive..alpha.beta.T.cell	0.00131666	0
platelet	naive.thymus.derived.CD4.positive..alpha.beta.T.cell	0.00131234	0
hematopoietic.stem.cell	naive.thymus.derived.CD8.positive..alpha.beta.T.cell	0.00110011	0
type.i.nk.t.cell	mesenchymal.stem.cell	0.00108108	0
neutrophil	CD8.positive..alpha.beta.memory.T.cell	0.000921659	0
cd8.positive..alpha.beta.t.cell	naive.thymus.derived.CD4.positive..alpha.beta.T.cell	0.000888099	0
cd8.positive..alpha.beta.t.cell	follicular.B.cell	0.000801282	0
platelet	CD8.positive..alpha.beta.memory.T.cell	0.000659631	0
cd8.positive..alpha.beta.memory.t.cell	epithelial.cell	0	0
cd4.positive..alpha.beta.memory.t.cell	macrophage	0	0
cd4.positive..alpha.beta.memory.t.cell	plasmacytoid.dendritic.cell	0	0
cd8.positive..alpha.beta.memory.t.cell	T1.B.cell	0	0
cd4.positive..alpha.beta.memory.t.cell	mesenchymal.stem.cell	0	0
naive.thymus.derived.cd4.positive..alpha.beta.t.cell	mesenchymal.stem.cell	0	0
cd4.positive..alpha.beta.memory.t.cell	monocyte	0	0
cd8.positive..alpha.beta.memory.t.cell	monocyte	0	0
naive.thymus.derived.cd4.positive..alpha.beta.t.cell	monocyte	0	0
cd8.positive..alpha.beta.memory.t.cell	conventional.dendritic.cell	0	0
naive.thymus.derived.cd8.positive..alpha.beta.t.cell	conventional.dendritic.cell	0	0
memory.b.cell	natural.killer.cell	0	0
naive.thymus.derived.cd4.positive..alpha.beta.t.cell	natural.killer.cell	0	0
cd8.positive..alpha.beta.memory.t.cell	follicular.B.cell	0	0
memory.b.cell	follicular.B.cell	0	0
naive.b.cell	follicular.B.cell	0	0
naive.thymus.derived.cd4.positive..alpha.beta.t.cell	follicular.B.cell	0	0
cd4.positive..alpha.beta.memory.t.cell	marginal.zone.B.cell.of.spleen	0	0
cd8.positive..alpha.beta.memory.t.cell	marginal.zone.B.cell.of.spleen	0	0
cd8.positive..alpha.beta.t.cell	marginal.zone.B.cell.of.spleen	0	0
naive.thymus.derived.cd4.positive..alpha.beta.t.cell	marginal.zone.B.cell.of.spleen	0	0
naive.thymus.derived.cd8.positive..alpha.beta.t.cell	marginal.zone.B.cell.of.spleen	0	0
type.i.nk.t.cell	marginal.zone.B.cell.of.spleen	0	0
cd1c.positive.myeloid.dendritic.cell	activated.CD4.positive..alpha.beta.T.cell	0	0
cd141.positive.myeloid.dendritic.cell	activated.CD4.positive..alpha.beta.T.cell	0	0
plasma.cell	activated.CD4.positive..alpha.beta.T.cell	0	0
cd1c.positive.myeloid.dendritic.cell	CD8.positive..alpha.beta.memory.T.cell	0	0
cd4.positive..alpha.beta.memory.t.cell	CD8.positive..alpha.beta.memory.T.cell	0	0
cd8.positive..alpha.beta.t.cell	CD8.positive..alpha.beta.memory.T.cell	0	0
cd141.positive.myeloid.dendritic.cell	CD8.positive..alpha.beta.memory.T.cell	0	0
classical.monocyte	CD8.positive..alpha.beta.memory.T.cell	0	0
intermediate.monocyte	CD8.positive..alpha.beta.memory.T.cell	0	0
macrophage	CD8.positive..alpha.beta.memory.T.cell	0	0
memory.b.cell	CD8.positive..alpha.beta.memory.T.cell	0	0
naive.b.cell	CD8.positive..alpha.beta.memory.T.cell	0	0
naive.thymus.derived.cd4.positive..alpha.beta.t.cell	CD8.positive..alpha.beta.memory.T.cell	0	0
naive.thymus.derived.cd8.positive..alpha.beta.t.cell	CD8.positive..alpha.beta.memory.T.cell	0	0
plasma.cell	CD8.positive..alpha.beta.memory.T.cell	0	0
plasmacytoid.dendritic.cell	CD8.positive..alpha.beta.memory.T.cell	0	0
regulatory.t.cell	CD8.positive..alpha.beta.memory.T.cell	0	0
cd1c.positive.myeloid.dendritic.cell	naive.thymus.derived.CD8.positive..alpha.beta.T.cell	0	0
cd4.positive..alpha.beta.memory.t.cell	naive.thymus.derived.CD8.positive..alpha.beta.T.cell	0	0
cd8.positive..alpha.beta.t.cell	naive.thymus.derived.CD8.positive..alpha.beta.T.cell	0	0
classical.monocyte	naive.thymus.derived.CD8.positive..alpha.beta.T.cell	0	0
erythrocyte	naive.thymus.derived.CD8.positive..alpha.beta.T.cell	0	0
intermediate.monocyte	naive.thymus.derived.CD8.positive..alpha.beta.T.cell	0	0
mature.nk.t.cell	naive.thymus.derived.CD8.positive..alpha.beta.T.cell	0	0
memory.b.cell	naive.thymus.derived.CD8.positive..alpha.beta.T.cell	0	0
naive.b.cell	naive.thymus.derived.CD8.positive..alpha.beta.T.cell	0	0
neutrophil	naive.thymus.derived.CD8.positive..alpha.beta.T.cell	0	0
nk.cell	naive.thymus.derived.CD8.positive..alpha.beta.T.cell	0	0
plasma.cell	naive.thymus.derived.CD8.positive..alpha.beta.T.cell	0	0
plasmacytoid.dendritic.cell	naive.thymus.derived.CD8.positive..alpha.beta.T.cell	0	0
type.i.nk.t.cell	naive.thymus.derived.CD8.positive..alpha.beta.T.cell	0	0
cd1c.positive.myeloid.dendritic.cell	naive.thymus.derived.CD4.positive..alpha.beta.T.cell	0	0
cd8.positive..alpha.beta.memory.t.cell	naive.thymus.derived.CD4.positive..alpha.beta.T.cell	0	0
cd141.positive.myeloid.dendritic.cell	naive.thymus.derived.CD4.positive..alpha.beta.T.cell	0	0
classical.monocyte	naive.thymus.derived.CD4.positive..alpha.beta.T.cell	0	0
erythrocyte	naive.thymus.derived.CD4.positive..alpha.beta.T.cell	0	0
hematopoietic.stem.cell	naive.thymus.derived.CD4.positive..alpha.beta.T.cell	0	0
intermediate.monocyte	naive.thymus.derived.CD4.positive..alpha.beta.T.cell	0	0
macrophage	naive.thymus.derived.CD4.positive..alpha.beta.T.cell	0	0
memory.b.cell	naive.thymus.derived.CD4.positive..alpha.beta.T.cell	0	0
plasma.cell	naive.thymus.derived.CD4.positive..alpha.beta.T.cell	0	0
type.i.nk.t.cell	naive.thymus.derived.CD4.positive..alpha.beta.T.cell	0	0

## Sheet: Tongue
Supplementary File 5E. Matching cell types between human and mouse in tongue.
Human cell type	Mouse cell type	matchSCore2 score	Matching cell types (1=Yes, 0=No)
immune.cell	Langerhans.cell	0.157268	1
keratinocyte	keratinocyte.1	0.0803059	1
keratinocyte	keratinocyte	0.0553977	1
epithelial.cell	mesenchymal.stem.cell	0.0549313	1
schwann.cell	basal.cell.1	0.040871	0
endothelial.cell.of.artery	Langerhans.cell	0.0359086	0
endothelial.cell.of.artery	basal.cell.1	0.0337756	0
endothelial.cell.of.lymphatic.vessel	Langerhans.cell	0.03125	0
endothelial.cell.of.lymphatic.vessel	basal.cell.1	0.0282369	0
schwann.cell	Langerhans.cell	0.0267829	0
basal.cell	mesenchymal.stem.cell	0.0264106	0
pericyte.cell	Langerhans.cell	0.024453	0
schwann.cell	mesenchymal.stem.cell	0.0234004	0
immune.cell	mesenchymal.stem.cell	0.0204236	0
endothelial.cell.of.artery	mesenchymal.stem.cell	0.0203193	0
basal.cell	keratinocyte.1	0.019802	0
schwann.cell	keratinocyte	0.0197216	0
fibroblast	basal.cell	0.0186757	0
basal.cell	basal.cell.1	0.0183888	0
pericyte.cell	basal.cell.1	0.0181554	0
immune.cell	basal.cell.1	0.0171885	0
pericyte.cell	keratinocyte	0.0163577	0
capillary.endothelial.cell	basal.cell.1	0.0161551	0
capillary.endothelial.cell	Langerhans.cell	0.0154278	0
tongue.muscle.cell	basal.cell.1	0.0152	0
fibroblast	basal.cell.1	0.0151515	0
vein.endothelial.cell	Langerhans.cell	0.015025	0
basal.cell	keratinocyte	0.0146413	0
capillary.endothelial.cell	keratinocyte	0.014157	0
endothelial.cell.of.artery	keratinocyte	0.0138549	0
keratinocyte	basal.cell.1	0.0125209	0
fibroblast	Langerhans.cell	0.0124567	0
tongue.muscle.cell	mesenchymal.stem.cell	0.0115789	0
endothelial.cell.of.lymphatic.vessel	basal.cell	0.0110974	0
endothelial.cell.of.lymphatic.vessel	mesenchymal.stem.cell	0.0110922	0
endothelial.cell.of.lymphatic.vessel	keratinocyte	0.0108696	0
schwann.cell	basal.cell	0.0103778	0
basal.cell	keratinocyte.2	0.0101523	0
basal.cell	Langerhans.cell	0.00970149	0
endothelial.cell.of.artery	basal.cell	0.00969932	0
capillary.endothelial.cell	mesenchymal.stem.cell	0.00956429	0
endothelial.cell.of.lymphatic.vessel	basal.cell.4	0.00924703	0
pericyte.cell	basal.cell.4	0.0089955	0
epithelial.cell	keratinocyte	0.00886263	0
immune.cell	keratinocyte	0.00849618	0
pericyte.cell	basal.cell	0.00829876	0
tongue.muscle.cell	Langerhans.cell	0.00829302	0
basal.cell	basal.cell	0.00823045	0
epithelial.cell	basal.cell.2	0.00815217	0
pericyte.cell	keratinocyte.1	0.00802139	0
basal.cell	basal.cell.2	0.00793651	0
fibroblast	keratinocyte.2	0.00793651	0
pericyte.cell	keratinocyte.2	0.00791139	0
vein.endothelial.cell	keratinocyte.2	0.00772201	0
epithelial.cell	basal.cell.1	0.0069869	0
basal.cell	basal.cell.4	0.00696056	0
capillary.endothelial.cell	basal.cell	0.00688468	0
keratinocyte	keratinocyte.2	0.00674157	0
capillary.endothelial.cell	keratinocyte.1	0.00660066	0
schwann.cell	basal.cell.4	0.00634786	0
epithelial.cell	basal.cell	0.00628931	0
fibroblast	keratinocyte	0.00626566	0
fibroblast	mesenchymal.stem.cell	0.00625652	0
capillary.endothelial.cell	keratinocyte.2	0.00612245	0
vein.endothelial.cell	basal.cell.1	0.00588235	0
keratinocyte	Langerhans.cell	0.00573477	0
capillary.endothelial.cell	basal.cell.4	0.00570342	0
tongue.muscle.cell	basal.cell.4	0.00558659	0
vein.endothelial.cell	keratinocyte	0.00542495	0
schwann.cell	keratinocyte.2	0.00515021	0
endothelial.cell.of.artery	basal.cell.4	0.00510204	0
tongue.muscle.cell	keratinocyte	0.00503145	0
schwann.cell	keratinocyte.1	0.00490396	0
epithelial.cell	basal.cell.4	0.00473934	0
keratinocyte	basal.cell.2	0.004662	0
pericyte.cell	mesenchymal.stem.cell	0.00459137	0
epithelial.cell	Langerhans.cell	0.00448766	0
keratinocyte	mesenchymal.stem.cell	0.00443951	0
tongue.muscle.cell	basal.cell.3	0.00442478	0
fibroblast	basal.cell.3	0.00438596	0
endothelial.cell.of.lymphatic.vessel	basal.cell.2	0.00423729	0
vein.endothelial.cell	mesenchymal.stem.cell	0.0041958	0
endothelial.cell.of.lymphatic.vessel	keratinocyte.2	0.00413793	0
tongue.muscle.cell	basal.cell.2	0.00412371	0
vein.endothelial.cell	basal.cell.2	0.00411523	0
immune.cell	basal.cell	0.00408163	0
epithelial.cell	keratinocyte.1	0.00397614	0
endothelial.cell.of.artery	keratinocyte.1	0.00376648	0
keratinocyte	basal.cell	0.00371747	0
fibroblast	basal.cell.4	0.00369004	0
endothelial.cell.of.lymphatic.vessel	keratinocyte.1	0.00356295	0
immune.cell	basal.cell.2	0.00344037	0
vein.endothelial.cell	basal.cell	0.00284091	0
vein.endothelial.cell	keratinocyte.1	0.00265252	0
schwann.cell	basal.cell.2	0.00258732	0
epithelial.cell	keratinocyte.2	0.00258398	0
immune.cell	keratinocyte.2	0.00224719	0
immune.cell	basal.cell.4	0.00215983	0
keratinocyte	basal.cell.4	0.00207039	0
fibroblast	basal.cell.2	0.00204082	0
immune.cell	keratinocyte.1	0.0019861	0
tongue.muscle.cell	basal.cell	0.00168067	0
fibroblast	keratinocyte.1	0.00160256	0
immune.cell	basal.cell.3	0.00118906	0
endothelial.cell.of.artery	basal.cell.3	0.00111359	0
endothelial.cell.of.artery	basal.cell.2	0.00107411	0
tongue.muscle.cell	keratinocyte.1	0	0
capillary.endothelial.cell	basal.cell.2	0	0
pericyte.cell	basal.cell.2	0	0
endothelial.cell.of.artery	keratinocyte.2	0	0
tongue.muscle.cell	keratinocyte.2	0	0
basal.cell	basal.cell.3	0	0
capillary.endothelial.cell	basal.cell.3	0	0
endothelial.cell.of.lymphatic.vessel	basal.cell.3	0	0
epithelial.cell	basal.cell.3	0	0
keratinocyte	basal.cell.3	0	0
pericyte.cell	basal.cell.3	0	0
schwann.cell	basal.cell.3	0	0
vein.endothelial.cell	basal.cell.3	0	0
vein.endothelial.cell	basal.cell.4	0	0

## Sheet: Trachea
Supplementary File 5F. Matching cell types between human and mouse in trachea.
Human cell type	Mouse cell type	matchSCore2 score	Matching cell types (1=Yes, 0=No)
fibroblast	fibroblast.2	0.175038	1
smooth.muscle.cell	myofibroblast.cell	0.148026	1
ciliated.cell	ciliated.epithelial.cell	0.141048	1
endothelial.cell	capillary.endothelial.cell	0.123418	1
connective.tissue.cell	fibroblast.2	0.122586	1
endothelial.cell	endothelial.cell.of.artery	0.115441	1
macrophage	macrophage	0.109529	1
macrophage	fibroblast	0.108999	1
fibroblast	fibroblast.1	0.0978593	1
connective.tissue.cell	fibroblast.1	0.0919149	1
endothelial.cell	vein.endothelial.cell	0.0837044	1
goblet.cell	glandular.epithelial.cell	0.0802603	1
cd8.positive..alpha.beta.t.cell	T.cell	0.0777778	1
basal.cell	club.cell	0.0775463	1
neutrophil	macrophage	0.0686963	1
ionocyte	ciliated.epithelial.cell	0.0657769	1
endothelial.cell	endothelial.cell.of.lymphatic.vessel	0.0656604	1
secretory.cell	club.cell	0.0654397	1
fibroblast	chondrocyte	0.0625	1
neutrophil	fibroblast	0.0602929	1
ionocyte	thyroid.follicular.cell	0.0559105	1
ionocyte	myelinating.Schwann.cell	0.0515163	1
b.cell	T.cell	0.0481771	0
connective.tissue.cell	chondrocyte	0.0480693	0
b.cell	dendritic.cell.1	0.0462046	0
connective.tissue.cell	non.myelinating.Schwann.cell	0.0451687	0
double.positive..alpha.beta.thymocyte	ciliated.epithelial.cell	0.0410461	0
goblet.cell	thyroid.follicular.cell	0.040715	0
cd4.positive..alpha.beta.t.cell	T.cell	0.0398818	0
macrophage	dendritic.cell.1	0.0384615	0
double.positive..alpha.beta.thymocyte	myelinating.Schwann.cell	0.0350801	0
ionocyte	non.myelinating.Schwann.cell	0.0348089	0
double.positive..alpha.beta.thymocyte	T.cell	0.0347826	0
smooth.muscle.cell	non.myelinating.Schwann.cell	0.0339233	0
goblet.cell	ciliated.epithelial.cell	0.0329025	0
neutrophil	endothelial.cell.of.artery	0.0326843	0
macrophage	dendritic.cell	0.0326531	0
smooth.muscle.cell	chondrocyte	0.0319635	0
mucus.secreting.cell	club.cell	0.031768	0
mast.cell	T.cell	0.0316973	0
neutrophil	T.cell	0.0311342	0
goblet.cell	club.cell	0.0311174	0
neutrophil	non.myelinating.Schwann.cell	0.030303	0
mast.cell	macrophage	0.0302714	0
smooth.muscle.cell	fibroblast.1	0.0288115	0
basal.cell	thyroid.follicular.cell	0.0288066	0
serous.cell.of.epithelium.of.trachea	glandular.epithelial.cell	0.028169	0
connective.tissue.cell	myelinating.Schwann.cell	0.028169	0
mast.cell	endothelial.cell.of.artery	0.027959	0
endothelial.cell	non.myelinating.Schwann.cell	0.0267442	0
connective.tissue.cell	myofibroblast.cell	0.0264808	0
endothelial.cell	myofibroblast.cell	0.0261818	0
fibroblast	non.myelinating.Schwann.cell	0.0259951	0
basal.cell	non.myelinating.Schwann.cell	0.0252294	0
plasma.cell	thyroid.follicular.cell	0.0251497	0
smooth.muscle.cell	fibroblast.2	0.0247469	0
smooth.muscle.cell	myelinating.Schwann.cell	0.0245358	0
basal.cell	myelinating.Schwann.cell	0.0241546	0
t.cell	T.cell	0.0239852	0
serous.cell.of.epithelium.of.trachea	thyroid.follicular.cell	0.0237489	0
ciliated.cell	myelinating.Schwann.cell	0.0236474	0
b.cell	macrophage	0.0235294	0
mast.cell	myelinating.Schwann.cell	0.0232717	0
b.cell	dendritic.cell	0.0232108	0
neutrophil	dendritic.cell	0.0229358	0
neutrophil	myelinating.Schwann.cell	0.0228883	0
macrophage	T.cell	0.0227273	0
fibroblast	endothelial.cell.of.lymphatic.vessel	0.0224972	0
smooth.muscle.cell	thyroid.follicular.cell	0.0218239	0
cd8.positive..alpha.beta.t.cell	macrophage	0.0216086	0
connective.tissue.cell	endothelial.cell.of.lymphatic.vessel	0.021483	0
endothelial.cell	myelinating.Schwann.cell	0.0214018	0
double.positive..alpha.beta.thymocyte	non.myelinating.Schwann.cell	0.0213636	0
neutrophil	dendritic.cell.1	0.0209205	0
serous.cell.of.epithelium.of.trachea	club.cell	0.0206897	0
connective.tissue.cell	endothelial.cell.of.artery	0.0206852	0
mast.cell	fibroblast	0.0204327	0
neutrophil	capillary.endothelial.cell	0.0198384	0
serous.cell.of.epithelium.of.trachea	ciliated.epithelial.cell	0.0196809	0
mast.cell	non.myelinating.Schwann.cell	0.0196078	0
connective.tissue.cell	ciliated.epithelial.cell	0.0195833	0
cd8.positive..alpha.beta.t.cell	dendritic.cell.1	0.0188679	0
serous.cell.of.epithelium.of.trachea	non.myelinating.Schwann.cell	0.0188383	0
macrophage	myelinating.Schwann.cell	0.0187542	0
basal.cell	ciliated.epithelial.cell	0.018711	0
ionocyte	endothelial.cell.of.lymphatic.vessel	0.0183918	0
ionocyte	capillary.endothelial.cell	0.0183291	0
smooth.muscle.cell	capillary.endothelial.cell	0.0183221	0
mucus.secreting.cell	thyroid.follicular.cell	0.0181471	0
ciliated.cell	non.myelinating.Schwann.cell	0.0180045	0
fibroblast	myofibroblast.cell	0.0179372	0
smooth.muscle.cell	vein.endothelial.cell	0.0178998	0
mucus.secreting.cell	glandular.epithelial.cell	0.0177515	0
neutrophil	ciliated.epithelial.cell	0.0177336	0
smooth.muscle.cell	endothelial.cell.of.lymphatic.vessel	0.0174757	0
cd8.positive..alpha.beta.t.cell	myelinating.Schwann.cell	0.0172156	0
ionocyte	endothelial.cell.of.artery	0.0171849	0
mast.cell	ciliated.epithelial.cell	0.0170279	0
double.positive..alpha.beta.thymocyte	thyroid.follicular.cell	0.0169811	0
neutrophil	endothelial.cell.of.lymphatic.vessel	0.0169492	0
macrophage	capillary.endothelial.cell	0.0167488	0
ciliated.cell	thyroid.follicular.cell	0.0166667	0
ionocyte	club.cell	0.0166157	0
mucus.secreting.cell	ciliated.epithelial.cell	0.0165999	0
serous.cell.of.epithelium.of.trachea	chondrocyte	0.0165184	0
ionocyte	myofibroblast.cell	0.0162254	0
macrophage	non.myelinating.Schwann.cell	0.0162242	0
double.positive..alpha.beta.thymocyte	endothelial.cell.of.lymphatic.vessel	0.0161031	0
ciliated.cell	club.cell	0.015873	0
neutrophil	myofibroblast.cell	0.0154639	0
cd8.positive..alpha.beta.t.cell	vein.endothelial.cell	0.0152207	0
double.positive..alpha.beta.thymocyte	capillary.endothelial.cell	0.0149493	0
mast.cell	dendritic.cell.1	0.0145278	0
mast.cell	thyroid.follicular.cell	0.0144811	0
basal.cell	capillary.endothelial.cell	0.0142712	0
mast.cell	myofibroblast.cell	0.0142421	0
mast.cell	endothelial.cell.of.lymphatic.vessel	0.0142276	0
cd4.positive..alpha.beta.t.cell	dendritic.cell	0.014218	0
macrophage	thyroid.follicular.cell	0.0141844	0
smooth.muscle.cell	endothelial.cell.of.artery	0.0140721	0
secretory.cell	glandular.epithelial.cell	0.013986	0
neutrophil	vein.endothelial.cell	0.0136869	0
cd8.positive..alpha.beta.t.cell	endothelial.cell.of.artery	0.0136268	0
cd8.positive..alpha.beta.t.cell	dendritic.cell	0.0135823	0
neutrophil	thyroid.follicular.cell	0.0135719	0
b.cell	endothelial.cell.of.artery	0.0135287	0
basal.cell	dendritic.cell.1	0.0134804	0
double.positive..alpha.beta.thymocyte	macrophage	0.0134626	0
goblet.cell	myelinating.Schwann.cell	0.0134387	0
connective.tissue.cell	thyroid.follicular.cell	0.0134189	0
double.positive..alpha.beta.thymocyte	myofibroblast.cell	0.0133905	0
secretory.cell	thyroid.follicular.cell	0.013269	0
plasma.cell	glandular.epithelial.cell	0.013245	0
mast.cell	capillary.endothelial.cell	0.0130916	0
mast.cell	chondrocyte	0.0130486	0
fibroblast	myelinating.Schwann.cell	0.0129683	0
connective.tissue.cell	club.cell	0.0128571	0
macrophage	chondrocyte	0.0126582	0
serous.cell.of.epithelium.of.trachea	myelinating.Schwann.cell	0.0126493	0
b.cell	capillary.endothelial.cell	0.0126263	0
cd8.positive..alpha.beta.t.cell	thyroid.follicular.cell	0.0126013	0
macrophage	endothelial.cell.of.artery	0.0125561	0
goblet.cell	fibroblast.2	0.0125	0
mast.cell	dendritic.cell	0.0124309	0
ionocyte	macrophage	0.0123879	0
basal.cell	endothelial.cell.of.lymphatic.vessel	0.0123077	0
secretory.cell	endothelial.cell.of.lymphatic.vessel	0.0122807	0
double.positive..alpha.beta.thymocyte	endothelial.cell.of.artery	0.0121581	0
fibroblast	capillary.endothelial.cell	0.0121413	0
endothelial.cell	thyroid.follicular.cell	0.0120846	0
basal.cell	chondrocyte	0.0120048	0
cd4.positive..alpha.beta.t.cell	macrophage	0.0118694	0
double.positive..alpha.beta.thymocyte	dendritic.cell.1	0.0116754	0
smooth.muscle.cell	ciliated.epithelial.cell	0.0115115	0
b.cell	endothelial.cell.of.lymphatic.vessel	0.011465	0
mucus.secreting.cell	non.myelinating.Schwann.cell	0.0113636	0
macrophage	vein.endothelial.cell	0.0109756	0
ionocyte	dendritic.cell.1	0.010924	0
connective.tissue.cell	capillary.endothelial.cell	0.0109141	0
macrophage	endothelial.cell.of.lymphatic.vessel	0.0108588	0
cd8.positive..alpha.beta.t.cell	non.myelinating.Schwann.cell	0.0108063	0
serous.cell.of.epithelium.of.trachea	myofibroblast.cell	0.0107181	0
mast.cell	fibroblast.2	0.0105634	0
cd8.positive..alpha.beta.t.cell	capillary.endothelial.cell	0.010453	0
basal.cell	macrophage	0.010352	0
fibroblast	thyroid.follicular.cell	0.0103448	0
ciliated.cell	myofibroblast.cell	0.0102784	0
ciliated.cell	endothelial.cell.of.lymphatic.vessel	0.010274	0
basal.cell	T.cell	0.0101215	0
fibroblast	endothelial.cell.of.artery	0.00996016	0
double.positive..alpha.beta.thymocyte	dendritic.cell	0.00992556	0
neutrophil	club.cell	0.00991609	0
cd8.positive..alpha.beta.t.cell	ciliated.epithelial.cell	0.00990644	0
fibroblast	vein.endothelial.cell	0.00990099	0
macrophage	myofibroblast.cell	0.00987167	0
basal.cell	dendritic.cell	0.00979021	0
secretory.cell	ciliated.epithelial.cell	0.00977199	0
ionocyte	vein.endothelial.cell	0.00969977	0
macrophage	fibroblast.1	0.00969697	0
connective.tissue.cell	macrophage	0.00966184	0
macrophage	ciliated.epithelial.cell	0.00960566	0
b.cell	thyroid.follicular.cell	0.0095511	0
cd4.positive..alpha.beta.t.cell	thyroid.follicular.cell	0.0095037	0
cd4.positive..alpha.beta.t.cell	dendritic.cell.1	0.0094697	0
b.cell	fibroblast	0.00938967	0
cd8.positive..alpha.beta.t.cell	myofibroblast.cell	0.00937866	0
cd4.positive..alpha.beta.t.cell	myelinating.Schwann.cell	0.00932994	0
double.positive..alpha.beta.thymocyte	fibroblast	0.00925926	0
b.cell	ciliated.epithelial.cell	0.00913764	0
fibroblast	ciliated.epithelial.cell	0.00911528	0
cd4.positive..alpha.beta.t.cell	ciliated.epithelial.cell	0.0090854	0
ionocyte	chondrocyte	0.0090212	0
goblet.cell	endothelial.cell.of.lymphatic.vessel	0.00899743	0
b.cell	myofibroblast.cell	0.00890585	0
endothelial.cell	ciliated.epithelial.cell	0.00888325	0
basal.cell	fibroblast.1	0.00887199	0
endothelial.cell	dendritic.cell.1	0.00886382	0
b.cell	non.myelinating.Schwann.cell	0.00878735	0
mast.cell	fibroblast.1	0.00875	0
cd4.positive..alpha.beta.t.cell	capillary.endothelial.cell	0.00863309	0
b.cell	myelinating.Schwann.cell	0.00859375	0
ciliated.cell	endothelial.cell.of.artery	0.00859247	0
mast.cell	club.cell	0.00856531	0
serous.cell.of.epithelium.of.trachea	capillary.endothelial.cell	0.00847458	0
plasma.cell	T.cell	0.00834725	0
double.positive..alpha.beta.thymocyte	vein.endothelial.cell	0.00831354	0
basal.cell	endothelial.cell.of.artery	0.00831025	0
cd8.positive..alpha.beta.t.cell	endothelial.cell.of.lymphatic.vessel	0.00818713	0
neutrophil	chondrocyte	0.00815661	0
goblet.cell	non.myelinating.Schwann.cell	0.0079646	0
endothelial.cell	chondrocyte	0.00794913	0
endothelial.cell	fibroblast.2	0.00790514	0
connective.tissue.cell	vein.endothelial.cell	0.00788022	0
goblet.cell	chondrocyte	0.00786164	0
neutrophil	fibroblast.1	0.00762712	0
ionocyte	T.cell	0.00758214	0
serous.cell.of.epithelium.of.trachea	macrophage	0.0075594	0
mucus.secreting.cell	endothelial.cell.of.lymphatic.vessel	0.00752823	0
macrophage	club.cell	0.00728408	0
cd4.positive..alpha.beta.t.cell	myofibroblast.cell	0.00727802	0
cd4.positive..alpha.beta.t.cell	endothelial.cell.of.lymphatic.vessel	0.00726744	0
t.cell	dendritic.cell	0.00722022	0
basal.cell	glandular.epithelial.cell	0.00719424	0
endothelial.cell	macrophage	0.00718907	0
fibroblast	club.cell	0.00708383	0
cd8.positive..alpha.beta.t.cell	chondrocyte	0.00701262	0
macrophage	fibroblast.2	0.00681044	0
ciliated.cell	capillary.endothelial.cell	0.00680272	0
goblet.cell	fibroblast.1	0.00677966	0
ionocyte	glandular.epithelial.cell	0.00673077	0
serous.cell.of.epithelium.of.trachea	endothelial.cell.of.artery	0.00671785	0
plasma.cell	capillary.endothelial.cell	0.00670017	0
serous.cell.of.epithelium.of.trachea	fibroblast.1	0.00668449	0
mucus.secreting.cell	endothelial.cell.of.artery	0.00665188	0
mucus.secreting.cell	vein.endothelial.cell	0.00662252	0
fibroblast	T.cell	0.00656455	0
neutrophil	fibroblast.2	0.00647773	0
serous.cell.of.epithelium.of.trachea	dendritic.cell.1	0.00641849	0
endothelial.cell	T.cell	0.00636492	0
mucus.secreting.cell	macrophage	0.00635324	0
basal.cell	vein.endothelial.cell	0.00635324	0
double.positive..alpha.beta.thymocyte	chondrocyte	0.00632911	0
ionocyte	fibroblast	0.00631199	0
mucus.secreting.cell	myofibroblast.cell	0.00627353	0
mast.cell	vein.endothelial.cell	0.00626566	0
mucus.secreting.cell	dendritic.cell.1	0.00625978	0
basal.cell	myofibroblast.cell	0.00612245	0
mucus.secreting.cell	chondrocyte	0.00610687	0
basal.cell	fibroblast	0.0060024	0
smooth.muscle.cell	macrophage	0.00581959	0
cd4.positive..alpha.beta.t.cell	non.myelinating.Schwann.cell	0.00576369	0
smooth.muscle.cell	T.cell	0.00569801	0
t.cell	macrophage	0.00566038	0
cd8.positive..alpha.beta.t.cell	fibroblast	0.00564175	0
mucus.secreting.cell	dendritic.cell	0.00560748	0
fibroblast	macrophage	0.0055991	0
smooth.muscle.cell	fibroblast	0.00559284	0
cd4.positive..alpha.beta.t.cell	fibroblast	0.00554529	0
t.cell	endothelial.cell.of.lymphatic.vessel	0.00554529	0
ionocyte	fibroblast.1	0.00550964	0
cd4.positive..alpha.beta.t.cell	chondrocyte	0.00549451	0
serous.cell.of.epithelium.of.trachea	vein.endothelial.cell	0.00536913	0
serous.cell.of.epithelium.of.trachea	endothelial.cell.of.lymphatic.vessel	0.00532481	0
connective.tissue.cell	fibroblast	0.00531108	0
fibroblast	fibroblast	0.00529101	0
secretory.cell	fibroblast.1	0.00520833	0
plasma.cell	macrophage	0.00518135	0
smooth.muscle.cell	club.cell	0.00506586	0
serous.cell.of.epithelium.of.trachea	fibroblast	0.00505689	0
connective.tissue.cell	T.cell	0.00473613	0
basal.cell	fibroblast.2	0.00472813	0
ciliated.cell	macrophage	0.00470488	0
mucus.secreting.cell	myelinating.Schwann.cell	0.00463679	0
mucus.secreting.cell	fibroblast	0.00460829	0
ciliated.cell	chondrocyte	0.00453309	0
plasma.cell	fibroblast	0.00452489	0
plasma.cell	ciliated.epithelial.cell	0.00449006	0
ionocyte	fibroblast.2	0.00447628	0
endothelial.cell	club.cell	0.00444444	0
secretory.cell	endothelial.cell.of.artery	0.00441826	0
plasma.cell	fibroblast.2	0.00440529	0
double.positive..alpha.beta.thymocyte	glandular.epithelial.cell	0.00437774	0
secretory.cell	non.myelinating.Schwann.cell	0.00431499	0
plasma.cell	non.myelinating.Schwann.cell	0.00424178	0
mast.cell	glandular.epithelial.cell	0.00423729	0
connective.tissue.cell	glandular.epithelial.cell	0.00423012	0
serous.cell.of.epithelium.of.trachea	T.cell	0.0042061	0
t.cell	club.cell	0.00411523	0
endothelial.cell	fibroblast.1	0.00411184	0
ciliated.cell	dendritic.cell.1	0.00410771	0
b.cell	glandular.epithelial.cell	0.0039604	0
smooth.muscle.cell	glandular.epithelial.cell	0.00395778	0
smooth.muscle.cell	dendritic.cell	0.00384615	0
connective.tissue.cell	dendritic.cell.1	0.00381971	0
ionocyte	dendritic.cell	0.00379507	0
cd4.positive..alpha.beta.t.cell	endothelial.cell.of.artery	0.00377358	0
mucus.secreting.cell	capillary.endothelial.cell	0.00371287	0
mucus.secreting.cell	T.cell	0.00369914	0
plasma.cell	myelinating.Schwann.cell	0.00368324	0
ciliated.cell	fibroblast.2	0.00361174	0
endothelial.cell	glandular.epithelial.cell	0.00356824	0
secretory.cell	macrophage	0.0035461	0
endothelial.cell	dendritic.cell	0.00349956	0
secretory.cell	capillary.endothelial.cell	0.00343053	0
smooth.muscle.cell	dendritic.cell.1	0.00338983	0
plasma.cell	myofibroblast.cell	0.00338983	0
goblet.cell	endothelial.cell.of.artery	0.00338219	0
b.cell	vein.endothelial.cell	0.00335008	0
mucus.secreting.cell	fibroblast.1	0.00327869	0
double.positive..alpha.beta.thymocyte	club.cell	0.0032769	0
ciliated.cell	fibroblast.1	0.00323774	0
secretory.cell	dendritic.cell	0.00321543	0
goblet.cell	dendritic.cell.1	0.00321027	0
endothelial.cell	fibroblast	0.00317712	0
ciliated.cell	fibroblast	0.00317604	0
goblet.cell	fibroblast	0.00315457	0
cd4.positive..alpha.beta.t.cell	club.cell	0.00314961	0
t.cell	endothelial.cell.of.artery	0.00309119	0
serous.cell.of.epithelium.of.trachea	dendritic.cell	0.00295421	0
t.cell	myelinating.Schwann.cell	0.00289017	0
t.cell	vein.endothelial.cell	0.00287356	0
secretory.cell	myelinating.Schwann.cell	0.00280112	0
cd8.positive..alpha.beta.t.cell	fibroblast.2	0.00276625	0
b.cell	club.cell	0.00271739	0
t.cell	dendritic.cell.1	0.00261097	0
goblet.cell	macrophage	0.00259067	0
goblet.cell	myofibroblast.cell	0.00255754	0
t.cell	fibroblast	0.00253807	0
goblet.cell	T.cell	0.00251889	0
plasma.cell	fibroblast.1	0.00249377	0
cd8.positive..alpha.beta.t.cell	club.cell	0.00248756	0
connective.tissue.cell	dendritic.cell	0.00248756	0
t.cell	thyroid.follicular.cell	0.00248447	0
serous.cell.of.epithelium.of.trachea	fibroblast.2	0.00248447	0
cd4.positive..alpha.beta.t.cell	glandular.epithelial.cell	0.00246914	0
t.cell	fibroblast.2	0.00246305	0
ciliated.cell	glandular.epithelial.cell	0.00241779	0
secretory.cell	dendritic.cell.1	0.00240385	0
plasma.cell	dendritic.cell.1	0.00231481	0
ciliated.cell	vein.endothelial.cell	0.00231481	0
secretory.cell	chondrocyte	0.00231481	0
secretory.cell	fibroblast.2	0.0022779	0
ciliated.cell	T.cell	0.00211327	0
cd4.positive..alpha.beta.t.cell	vein.endothelial.cell	0.00201207	0
cd4.positive..alpha.beta.t.cell	fibroblast.1	0.00199601	0
t.cell	ciliated.epithelial.cell	0.00198151	0
plasma.cell	club.cell	0.00186567	0
neutrophil	glandular.epithelial.cell	0.00183318	0
t.cell	capillary.endothelial.cell	0.00181488	0
cd4.positive..alpha.beta.t.cell	fibroblast.2	0.0018018	0
secretory.cell	myofibroblast.cell	0.00173913	0
secretory.cell	T.cell	0.00170358	0
goblet.cell	vein.endothelial.cell	0.00169779	0
fibroblast	glandular.epithelial.cell	0.00161031	0
b.cell	fibroblast.2	0.00152439	0
plasma.cell	endothelial.cell.of.artery	0.00143472	0
ciliated.cell	dendritic.cell	0.00143403	0
macrophage	glandular.epithelial.cell	0.0013587	0
fibroblast	dendritic.cell.1	0.0013369	0
double.positive..alpha.beta.thymocyte	fibroblast.2	0.00114025	0
t.cell	non.myelinating.Schwann.cell	0.00111483	0
double.positive..alpha.beta.thymocyte	fibroblast.1	0.000587889	0
secretory.cell	fibroblast	0	0
cd8.positive..alpha.beta.t.cell	glandular.epithelial.cell	0	0
t.cell	glandular.epithelial.cell	0	0
goblet.cell	dendritic.cell	0	0
fibroblast	dendritic.cell	0	0
plasma.cell	dendritic.cell	0	0
t.cell	myofibroblast.cell	0	0
goblet.cell	capillary.endothelial.cell	0	0
plasma.cell	vein.endothelial.cell	0	0
secretory.cell	vein.endothelial.cell	0	0
plasma.cell	endothelial.cell.of.lymphatic.vessel	0	0
b.cell	chondrocyte	0	0
plasma.cell	chondrocyte	0	0
t.cell	chondrocyte	0	0
b.cell	fibroblast.1	0	0
cd8.positive..alpha.beta.t.cell	fibroblast.1	0	0
t.cell	fibroblast.1	0	0
mucus.secreting.cell	fibroblast.2	0	0
