# Supplementary material for: Affected cell types for hundreds of Mendelian diseases revealed by analysis of human and mouse single-cell data
Source: eLife. 2024 Jan 10;13:e84613. doi: 10.7554/eLife.84613 (PMC10830129; doi:10.7554/eLife.84613)
Supplement: Supplementary file 6. [file elife-84613-supp6.xlsx]

## Sheet: Supplementary File 6
Supplementary File 6. Diseases and their PrEDiCT scores across mouse cell types per tissue.
Data per tissue appear in distinct tabs, as follows: 6A Bone marrow, 6B Lung, 6C Skeletal muscle, 6D Spleen, 6E Tongue, and 6F Trachea.

## Sheet: Bone marrow
Supplementary File 6A. Diseases and their PrEDiCT scores across cell types in bone marrow.
Disease\Phenotypic series accession (OMIM)	Disease name (OMIM)	Cell type name	PrEDiCT score	Number of orthologous causal genes	P value	FDR	Cell type likely-affected by disease (1=Yes, 0=No)
102700	Severe Combined Immunodeficiency, Autosomal Recessive, T Cell-negative,b Cell-negative, Nk Cell-negative, Due To Adenosine Deaminase Deficiency	proerythroblast	-0.7831	1	0.852	0.988	0
102700	Severe Combined Immunodeficiency, Autosomal Recessive, T Cell-negative,b Cell-negative, Nk Cell-negative, Due To Adenosine Deaminase Deficiency	reticulocyte	-0.674212	1	0.51	0.988	0
102700	Severe Combined Immunodeficiency, Autosomal Recessive, T Cell-negative,b Cell-negative, Nk Cell-negative, Due To Adenosine Deaminase Deficiency	erythroblast	-0.842401	1	0.607	0.988	0
102700	Severe Combined Immunodeficiency, Autosomal Recessive, T Cell-negative,b Cell-negative, Nk Cell-negative, Due To Adenosine Deaminase Deficiency	plasma cell	2.5503	1	0.038	0.38	0
102700	Severe Combined Immunodeficiency, Autosomal Recessive, T Cell-negative,b Cell-negative, Nk Cell-negative, Due To Adenosine Deaminase Deficiency	early pro-B cell	1.49788	1	0.14	0.56	0
102700	Severe Combined Immunodeficiency, Autosomal Recessive, T Cell-negative,b Cell-negative, Nk Cell-negative, Due To Adenosine Deaminase Deficiency	precursor B cell	0.431651	1	0.282	0.805714	0
102700	Severe Combined Immunodeficiency, Autosomal Recessive, T Cell-negative,b Cell-negative, Nk Cell-negative, Due To Adenosine Deaminase Deficiency	immature B cell	-0.400071	1	0.841	0.988	0
102700	Severe Combined Immunodeficiency, Autosomal Recessive, T Cell-negative,b Cell-negative, Nk Cell-negative, Due To Adenosine Deaminase Deficiency	basophil	0.00792503	1	0.28	0.805714	0
102700	Severe Combined Immunodeficiency, Autosomal Recessive, T Cell-negative,b Cell-negative, Nk Cell-negative, Due To Adenosine Deaminase Deficiency	myelocyte	0.881506	1	0.087	0.435	0
102700	Severe Combined Immunodeficiency, Autosomal Recessive, T Cell-negative,b Cell-negative, Nk Cell-negative, Due To Adenosine Deaminase Deficiency	hematopoietic stem cell	0.229317	1	0.335	0.8375	0
102700	Severe Combined Immunodeficiency, Autosomal Recessive, T Cell-negative,b Cell-negative, Nk Cell-negative, Due To Adenosine Deaminase Deficiency	macrophage	-0.494923	1	0.904	0.988	0
102700	Severe Combined Immunodeficiency, Autosomal Recessive, T Cell-negative,b Cell-negative, Nk Cell-negative, Due To Adenosine Deaminase Deficiency	T cell	-0.631681	1	0.879	0.988	0
102700	Severe Combined Immunodeficiency, Autosomal Recessive, T Cell-negative,b Cell-negative, Nk Cell-negative, Due To Adenosine Deaminase Deficiency	mature B cell	-0.672416	1	0.914	0.988	0
102700	Severe Combined Immunodeficiency, Autosomal Recessive, T Cell-negative,b Cell-negative, Nk Cell-negative, Due To Adenosine Deaminase Deficiency	monocyte	-0.631247	1	0.9	0.988	0
102700	Severe Combined Immunodeficiency, Autosomal Recessive, T Cell-negative,b Cell-negative, Nk Cell-negative, Due To Adenosine Deaminase Deficiency	conventional dendritic cell	-0.697142	1	0.988	0.988	0
102700	Severe Combined Immunodeficiency, Autosomal Recessive, T Cell-negative,b Cell-negative, Nk Cell-negative, Due To Adenosine Deaminase Deficiency	promyelocyte	-0.560476	1	0.968	0.988	0
102700	Severe Combined Immunodeficiency, Autosomal Recessive, T Cell-negative,b Cell-negative, Nk Cell-negative, Due To Adenosine Deaminase Deficiency	neutrophilic myeloblast	-0.778603	1	0.977	0.988	0
102700	Severe Combined Immunodeficiency, Autosomal Recessive, T Cell-negative,b Cell-negative, Nk Cell-negative, Due To Adenosine Deaminase Deficiency	neutrophilic metamyelocyte	1.97033	1	0.007	0.14	0
102700	Severe Combined Immunodeficiency, Autosomal Recessive, T Cell-negative,b Cell-negative, Nk Cell-negative, Due To Adenosine Deaminase Deficiency	band form neutrophil	0.264818	1	0.071	0.435	0
102700	Severe Combined Immunodeficiency, Autosomal Recessive, T Cell-negative,b Cell-negative, Nk Cell-negative, Due To Adenosine Deaminase Deficiency	segmented neutrophil of bone marrow	-0.667461	1	0.634	0.988	0
102900	Adenosine Triphosphate, Elevated, Of Erythrocytes	proerythroblast	4.24415	1	0	0	1
102900	Adenosine Triphosphate, Elevated, Of Erythrocytes	reticulocyte	-0.23514	1	0.388	0.827368	0
102900	Adenosine Triphosphate, Elevated, Of Erythrocytes	erythroblast	-0.23514	1	0.415	0.827368	0
102900	Adenosine Triphosphate, Elevated, Of Erythrocytes	plasma cell	-0.23514	1	0.624	0.827368	0
102900	Adenosine Triphosphate, Elevated, Of Erythrocytes	early pro-B cell	-0.23514	1	0.783	0.827368	0
102900	Adenosine Triphosphate, Elevated, Of Erythrocytes	precursor B cell	-0.23514	1	0.772	0.827368	0
102900	Adenosine Triphosphate, Elevated, Of Erythrocytes	immature B cell	-0.23514	1	0.782	0.827368	0
102900	Adenosine Triphosphate, Elevated, Of Erythrocytes	basophil	-0.23514	1	0.7	0.827368	0
102900	Adenosine Triphosphate, Elevated, Of Erythrocytes	myelocyte	-0.21506	1	0.668	0.827368	0
102900	Adenosine Triphosphate, Elevated, Of Erythrocytes	hematopoietic stem cell	-0.0317172	1	0.752	0.827368	0
102900	Adenosine Triphosphate, Elevated, Of Erythrocytes	macrophage	-0.23514	1	0.765	0.827368	0
102900	Adenosine Triphosphate, Elevated, Of Erythrocytes	T cell	-0.23514	1	0.656	0.827368	0
102900	Adenosine Triphosphate, Elevated, Of Erythrocytes	mature B cell	-0.23514	1	0.67	0.827368	0
102900	Adenosine Triphosphate, Elevated, Of Erythrocytes	monocyte	-0.23514	1	0.703	0.827368	0
102900	Adenosine Triphosphate, Elevated, Of Erythrocytes	conventional dendritic cell	-0.23514	1	0.847	0.847	0
102900	Adenosine Triphosphate, Elevated, Of Erythrocytes	promyelocyte	-0.23514	1	0.786	0.827368	0
102900	Adenosine Triphosphate, Elevated, Of Erythrocytes	neutrophilic myeloblast	-0.23514	1	0.783	0.827368	0
102900	Adenosine Triphosphate, Elevated, Of Erythrocytes	neutrophilic metamyelocyte	-0.23514	1	0.526	0.827368	0
102900	Adenosine Triphosphate, Elevated, Of Erythrocytes	band form neutrophil	-0.23514	1	0.458	0.827368	0
102900	Adenosine Triphosphate, Elevated, Of Erythrocytes	segmented neutrophil of bone marrow	-0.23514	1	0.463	0.827368	0
PS105650	Diamond-Blackfan anemia	proerythroblast	-0.371168	17	0.926	0.999	0
PS105650	Diamond-Blackfan anemia	reticulocyte	-1.5734	17	0.999	0.999	0
PS105650	Diamond-Blackfan anemia	erythroblast	-1.53299	17	0.999	0.999	0
PS105650	Diamond-Blackfan anemia	plasma cell	0.0692295	17	0.009	0.025	0
PS105650	Diamond-Blackfan anemia	early pro-B cell	0.675379	17	0.018	0.0327273	0
PS105650	Diamond-Blackfan anemia	precursor B cell	0.646704	17	0.01	0.025	0
PS105650	Diamond-Blackfan anemia	immature B cell	-0.159706	17	0.982	0.999	0
PS105650	Diamond-Blackfan anemia	basophil	0.165783	17	0.006	0.02	0
PS105650	Diamond-Blackfan anemia	myelocyte	0.850001	17	0	0	0
PS105650	Diamond-Blackfan anemia	hematopoietic stem cell	1.08759	17	0	0	1
PS105650	Diamond-Blackfan anemia	macrophage	0.325051	17	0.015	0.03	0
PS105650	Diamond-Blackfan anemia	T cell	1.72679	17	0	0	1
PS105650	Diamond-Blackfan anemia	mature B cell	1.127	17	0	0	1
PS105650	Diamond-Blackfan anemia	monocyte	0.077049	17	0.014	0.03	0
PS105650	Diamond-Blackfan anemia	conventional dendritic cell	0.17313	17	0.125	0.208333	0
PS105650	Diamond-Blackfan anemia	promyelocyte	0.443482	17	0.002	0.008	0
PS105650	Diamond-Blackfan anemia	neutrophilic myeloblast	-0.0486995	17	0.952	0.999	0
PS105650	Diamond-Blackfan anemia	neutrophilic metamyelocyte	-1.03353	17	0.999	0.999	0
PS105650	Diamond-Blackfan anemia	band form neutrophil	-1.40522	17	0.999	0.999	0
PS105650	Diamond-Blackfan anemia	segmented neutrophil of bone marrow	-1.54781	17	0.999	0.999	0
112250	Diaphyseal Medullary Stenosis With Malignant Fibrous Histiocytoma	proerythroblast	-0.7247	1	0.833	0.979	0
112250	Diaphyseal Medullary Stenosis With Malignant Fibrous Histiocytoma	reticulocyte	-1.23029	1	0.684	0.979	0
112250	Diaphyseal Medullary Stenosis With Malignant Fibrous Histiocytoma	erythroblast	-1.26534	1	0.792	0.979	0
112250	Diaphyseal Medullary Stenosis With Malignant Fibrous Histiocytoma	plasma cell	0.352681	1	0.184	0.545714	0
112250	Diaphyseal Medullary Stenosis With Malignant Fibrous Histiocytoma	early pro-B cell	1.2495	1	0.169	0.545714	0
112250	Diaphyseal Medullary Stenosis With Malignant Fibrous Histiocytoma	precursor B cell	1.55801	1	0.054	0.36	0
112250	Diaphyseal Medullary Stenosis With Malignant Fibrous Histiocytoma	immature B cell	-0.76523	1	0.965	0.979	0
112250	Diaphyseal Medullary Stenosis With Malignant Fibrous Histiocytoma	basophil	-0.249699	1	0.731	0.979	0
112250	Diaphyseal Medullary Stenosis With Malignant Fibrous Histiocytoma	myelocyte	0.378461	1	0.191	0.545714	0
112250	Diaphyseal Medullary Stenosis With Malignant Fibrous Histiocytoma	hematopoietic stem cell	1.92203	1	0.027	0.36	0
112250	Diaphyseal Medullary Stenosis With Malignant Fibrous Histiocytoma	macrophage	0.0702684	1	0.346	0.629091	0
112250	Diaphyseal Medullary Stenosis With Malignant Fibrous Histiocytoma	T cell	1.28599	1	0.05	0.36	0
112250	Diaphyseal Medullary Stenosis With Malignant Fibrous Histiocytoma	mature B cell	0.11012	1	0.234	0.575556	0
112250	Diaphyseal Medullary Stenosis With Malignant Fibrous Histiocytoma	monocyte	-0.14633	1	0.663	0.979	0
112250	Diaphyseal Medullary Stenosis With Malignant Fibrous Histiocytoma	conventional dendritic cell	0.326984	1	0.311	0.622	0
112250	Diaphyseal Medullary Stenosis With Malignant Fibrous Histiocytoma	promyelocyte	0.605437	1	0.144	0.545714	0
112250	Diaphyseal Medullary Stenosis With Malignant Fibrous Histiocytoma	neutrophilic myeloblast	0.21385	1	0.259	0.575556	0
112250	Diaphyseal Medullary Stenosis With Malignant Fibrous Histiocytoma	neutrophilic metamyelocyte	-1.16107	1	0.979	0.979	0
112250	Diaphyseal Medullary Stenosis With Malignant Fibrous Histiocytoma	band form neutrophil	-1.26534	1	0.924	0.979	0
112250	Diaphyseal Medullary Stenosis With Malignant Fibrous Histiocytoma	segmented neutrophil of bone marrow	-1.26534	1	0.869	0.979	0
116920	Leukocyte Adhesion Deficiency, Type I	proerythroblast	-1.09345	1	0.945	0.987	0
116920	Leukocyte Adhesion Deficiency, Type I	reticulocyte	-0.92133	1	0.581	0.987	0
116920	Leukocyte Adhesion Deficiency, Type I	erythroblast	-1.02428	1	0.667	0.987	0
116920	Leukocyte Adhesion Deficiency, Type I	plasma cell	0.39815	1	0.185	0.528571	0
116920	Leukocyte Adhesion Deficiency, Type I	early pro-B cell	-0.920217	1	0.978	0.987	0
116920	Leukocyte Adhesion Deficiency, Type I	precursor B cell	-0.934741	1	0.987	0.987	0
116920	Leukocyte Adhesion Deficiency, Type I	immature B cell	-0.947117	1	0.982	0.987	0
116920	Leukocyte Adhesion Deficiency, Type I	basophil	0.752817	1	0.115	0.46	0
116920	Leukocyte Adhesion Deficiency, Type I	myelocyte	-0.475916	1	0.846	0.987	0
116920	Leukocyte Adhesion Deficiency, Type I	hematopoietic stem cell	-0.75944	1	0.986	0.987	0
116920	Leukocyte Adhesion Deficiency, Type I	macrophage	-0.140395	1	0.751	0.987	0
116920	Leukocyte Adhesion Deficiency, Type I	T cell	0.316114	1	0.14	0.466667	0
116920	Leukocyte Adhesion Deficiency, Type I	mature B cell	-0.541248	1	0.859	0.987	0
116920	Leukocyte Adhesion Deficiency, Type I	monocyte	0.848349	1	0.111	0.46	0
116920	Leukocyte Adhesion Deficiency, Type I	conventional dendritic cell	0.153125	1	0.368	0.817778	0
116920	Leukocyte Adhesion Deficiency, Type I	promyelocyte	-0.13399	1	0.739	0.987	0
116920	Leukocyte Adhesion Deficiency, Type I	neutrophilic myeloblast	0.196175	1	0.316	0.79	0
116920	Leukocyte Adhesion Deficiency, Type I	neutrophilic metamyelocyte	0.974704	1	0.03	0.2	0
116920	Leukocyte Adhesion Deficiency, Type I	band form neutrophil	1.59936	1	0.017	0.2	0
116920	Leukocyte Adhesion Deficiency, Type I	segmented neutrophil of bone marrow	2.65332	1	0.02	0.2	0
PS120100	Familial cold autoinflammatory syndrome	proerythroblast	-0.711827	1	0.82	0.98	0
PS120100	Familial cold autoinflammatory syndrome	reticulocyte	-0.635494	1	0.493	0.98	0
PS120100	Familial cold autoinflammatory syndrome	erythroblast	-0.552784	1	0.521	0.98	0
PS120100	Familial cold autoinflammatory syndrome	plasma cell	-0.065434	1	0.591	0.98	0
PS120100	Familial cold autoinflammatory syndrome	early pro-B cell	-0.721556	1	0.955	0.98	0
PS120100	Familial cold autoinflammatory syndrome	precursor B cell	-0.721556	1	0.967	0.98	0
PS120100	Familial cold autoinflammatory syndrome	immature B cell	-0.701699	1	0.934	0.98	0
PS120100	Familial cold autoinflammatory syndrome	basophil	0.82197	1	0.113	0.452	0
PS120100	Familial cold autoinflammatory syndrome	myelocyte	-0.626098	1	0.914	0.98	0
PS120100	Familial cold autoinflammatory syndrome	hematopoietic stem cell	-0.603734	1	0.98	0.98	0
PS120100	Familial cold autoinflammatory syndrome	macrophage	-0.320201	1	0.817	0.98	0
PS120100	Familial cold autoinflammatory syndrome	T cell	-0.413044	1	0.761	0.98	0
PS120100	Familial cold autoinflammatory syndrome	mature B cell	-0.461116	1	0.819	0.98	0
PS120100	Familial cold autoinflammatory syndrome	monocyte	2.35585	1	0.018	0.19	0
PS120100	Familial cold autoinflammatory syndrome	conventional dendritic cell	-0.209996	1	0.825	0.98	0
PS120100	Familial cold autoinflammatory syndrome	promyelocyte	1.01892	1	0.067	0.446667	0
PS120100	Familial cold autoinflammatory syndrome	neutrophilic myeloblast	1.19944	1	0.102	0.452	0
PS120100	Familial cold autoinflammatory syndrome	neutrophilic metamyelocyte	-0.64007	1	0.754	0.98	0
PS120100	Familial cold autoinflammatory syndrome	band form neutrophil	-0.396906	1	0.521	0.98	0
PS120100	Familial cold autoinflammatory syndrome	segmented neutrophil of bone marrow	2.38534	1	0.019	0.19	0
PS127000	Kenny-Caffey syndrome	proerythroblast	1.62134	2	0.033	0.44	0
PS127000	Kenny-Caffey syndrome	reticulocyte	-1.52332	2	0.931	0.98	0
PS127000	Kenny-Caffey syndrome	erythroblast	-0.870558	2	0.729	0.883333	0
PS127000	Kenny-Caffey syndrome	plasma cell	-0.387127	2	0.795	0.883333	0
PS127000	Kenny-Caffey syndrome	early pro-B cell	0.278438	2	0.445	0.883333	0
PS127000	Kenny-Caffey syndrome	precursor B cell	-0.0272759	2	0.676	0.883333	0
PS127000	Kenny-Caffey syndrome	immature B cell	0.376523	2	0.397	0.883333	0
PS127000	Kenny-Caffey syndrome	basophil	-0.0312685	2	0.543	0.883333	0
PS127000	Kenny-Caffey syndrome	myelocyte	-0.0951626	2	0.613	0.883333	0
PS127000	Kenny-Caffey syndrome	hematopoietic stem cell	0.260754	2	0.406	0.883333	0
PS127000	Kenny-Caffey syndrome	macrophage	-0.688359	2	0.991	0.991	0
PS127000	Kenny-Caffey syndrome	T cell	-0.0182343	2	0.443	0.883333	0
PS127000	Kenny-Caffey syndrome	mature B cell	-0.307519	2	0.786	0.883333	0
PS127000	Kenny-Caffey syndrome	monocyte	0.602947	2	0.113	0.565	0
PS127000	Kenny-Caffey syndrome	conventional dendritic cell	-0.0543035	2	0.791	0.883333	0
PS127000	Kenny-Caffey syndrome	promyelocyte	0.417988	2	0.17	0.68	0
PS127000	Kenny-Caffey syndrome	neutrophilic myeloblast	0.986705	2	0.044	0.44	0
PS127000	Kenny-Caffey syndrome	neutrophilic metamyelocyte	-0.2495	2	0.439	0.883333	0
PS127000	Kenny-Caffey syndrome	band form neutrophil	-0.630463	2	0.71	0.883333	0
PS127000	Kenny-Caffey syndrome	segmented neutrophil of bone marrow	0.338397	2	0.107	0.565	0
131300	Camurati-engelmann Disease	proerythroblast	-1.03523	1	0.925	0.973	0
131300	Camurati-engelmann Disease	reticulocyte	-1.35266	1	0.775	0.973	0
131300	Camurati-engelmann Disease	erythroblast	-1.43351	1	0.861	0.973	0
131300	Camurati-engelmann Disease	plasma cell	-1.18408	1	0.973	0.973	0
131300	Camurati-engelmann Disease	early pro-B cell	1.81872	1	0.096	0.362	0
131300	Camurati-engelmann Disease	precursor B cell	1.0022	1	0.181	0.362	0
131300	Camurati-engelmann Disease	immature B cell	0.068196	1	0.371	0.674545	0
131300	Camurati-engelmann Disease	basophil	0.686828	1	0.122	0.362	0
131300	Camurati-engelmann Disease	myelocyte	0.301532	1	0.179	0.362	0
131300	Camurati-engelmann Disease	hematopoietic stem cell	1.02949	1	0.109	0.362	0
131300	Camurati-engelmann Disease	macrophage	0.591175	1	0.169	0.362	0
131300	Camurati-engelmann Disease	T cell	-0.820302	1	0.953	0.973	0
131300	Camurati-engelmann Disease	mature B cell	-0.00845699	1	0.577	0.961667	0
131300	Camurati-engelmann Disease	monocyte	0.841521	1	0.101	0.362	0
131300	Camurati-engelmann Disease	conventional dendritic cell	0.712734	1	0.171	0.362	0
131300	Camurati-engelmann Disease	promyelocyte	0.907118	1	0.095	0.362	0
131300	Camurati-engelmann Disease	neutrophilic myeloblast	0.821436	1	0.147	0.362	0
131300	Camurati-engelmann Disease	neutrophilic metamyelocyte	-0.772772	1	0.843	0.973	0
131300	Camurati-engelmann Disease	band form neutrophil	-1.14114	1	0.887	0.973	0
131300	Camurati-engelmann Disease	segmented neutrophil of bone marrow	-1.03281	1	0.802	0.973	0
PS133100	Erythrocytosis, familial	proerythroblast	-0.926097	3	0.979	0.998	0
PS133100	Erythrocytosis, familial	reticulocyte	-1.07281	3	0.69	0.996667	0
PS133100	Erythrocytosis, familial	erythroblast	-0.987922	3	0.749	0.996667	0
PS133100	Erythrocytosis, familial	plasma cell	-1.1221	3	0.998	0.998	0
PS133100	Erythrocytosis, familial	early pro-B cell	0.483452	3	0.211	0.844	0
PS133100	Erythrocytosis, familial	precursor B cell	-0.296241	3	0.897	0.996667	0
PS133100	Erythrocytosis, familial	immature B cell	-0.175016	3	0.84	0.996667	0
PS133100	Erythrocytosis, familial	basophil	-0.296241	3	0.813	0.996667	0
PS133100	Erythrocytosis, familial	myelocyte	-0.282929	3	0.813	0.996667	0
PS133100	Erythrocytosis, familial	hematopoietic stem cell	-0.035155	3	0.848	0.996667	0
PS133100	Erythrocytosis, familial	macrophage	-0.101701	3	0.804	0.996667	0
PS133100	Erythrocytosis, familial	T cell	-0.296241	3	0.751	0.996667	0
PS133100	Erythrocytosis, familial	mature B cell	-0.296241	3	0.788	0.996667	0
PS133100	Erythrocytosis, familial	monocyte	0.166678	3	0.15	0.75	0
PS133100	Erythrocytosis, familial	conventional dendritic cell	1.26823	3	0.018	0.36	0
PS133100	Erythrocytosis, familial	promyelocyte	0.476975	3	0.085	0.75	0
PS133100	Erythrocytosis, familial	neutrophilic myeloblast	0.423953	3	0.136	0.75	0
PS133100	Erythrocytosis, familial	neutrophilic metamyelocyte	-0.0761139	3	0.434	0.996667	0
PS133100	Erythrocytosis, familial	band form neutrophil	-0.296241	3	0.473	0.996667	0
PS133100	Erythrocytosis, familial	segmented neutrophil of bone marrow	-0.355106	3	0.547	0.996667	0
PS231200	Bleeding disorder, platelet-type	proerythroblast	-0.421327	14	0.933	0.997	0
PS231200	Bleeding disorder, platelet-type	reticulocyte	-0.450425	14	0.28	0.997	0
PS231200	Bleeding disorder, platelet-type	erythroblast	-0.443652	14	0.428	0.997	0
PS231200	Bleeding disorder, platelet-type	plasma cell	-0.429242	14	0.983	0.997	0
PS231200	Bleeding disorder, platelet-type	early pro-B cell	-0.16438	14	0.976	0.997	0
PS231200	Bleeding disorder, platelet-type	precursor B cell	-0.280962	14	0.996	0.997	0
PS231200	Bleeding disorder, platelet-type	immature B cell	-0.354477	14	0.996	0.997	0
PS231200	Bleeding disorder, platelet-type	basophil	-0.278072	14	0.972	0.997	0
PS231200	Bleeding disorder, platelet-type	myelocyte	-0.353498	14	0.996	0.997	0
PS231200	Bleeding disorder, platelet-type	hematopoietic stem cell	0.461691	14	0.014	0.28	0
PS231200	Bleeding disorder, platelet-type	macrophage	-0.309494	14	0.997	0.997	0
PS231200	Bleeding disorder, platelet-type	T cell	-0.236669	14	0.876	0.997	0
PS231200	Bleeding disorder, platelet-type	mature B cell	-0.250281	14	0.94	0.997	0
PS231200	Bleeding disorder, platelet-type	monocyte	-0.26215	14	0.961	0.997	0
PS231200	Bleeding disorder, platelet-type	conventional dendritic cell	-0.124084	14	0.995	0.997	0
PS231200	Bleeding disorder, platelet-type	promyelocyte	-0.316772	14	0.997	0.997	0
PS231200	Bleeding disorder, platelet-type	neutrophilic myeloblast	-0.277648	14	0.99	0.997	0
PS231200	Bleeding disorder, platelet-type	neutrophilic metamyelocyte	-0.203886	14	0.491	0.997	0
PS231200	Bleeding disorder, platelet-type	band form neutrophil	-0.251554	14	0.393	0.997	0
PS231200	Bleeding disorder, platelet-type	segmented neutrophil of bone marrow	-0.292064	14	0.454	0.997	0
140700	Heinz Body Anemias	proerythroblast	0.496523	2	0.164	0.974	0
140700	Heinz Body Anemias	reticulocyte	3.43961	2	0	0	1
140700	Heinz Body Anemias	erythroblast	2.1605	2	0.002	0.02	1
140700	Heinz Body Anemias	plasma cell	-0.34172	2	0.759	0.974	0
140700	Heinz Body Anemias	early pro-B cell	-0.363648	2	0.911	0.974	0
140700	Heinz Body Anemias	precursor B cell	-0.36602	2	0.918	0.974	0
140700	Heinz Body Anemias	immature B cell	-0.368739	2	0.906	0.974	0
140700	Heinz Body Anemias	basophil	-0.354087	2	0.864	0.974	0
140700	Heinz Body Anemias	myelocyte	-0.368842	2	0.88	0.974	0
140700	Heinz Body Anemias	hematopoietic stem cell	-0.355145	2	0.974	0.974	0
140700	Heinz Body Anemias	macrophage	-0.349351	2	0.917	0.974	0
140700	Heinz Body Anemias	T cell	-0.321425	2	0.779	0.974	0
140700	Heinz Body Anemias	mature B cell	-0.352642	2	0.841	0.974	0
140700	Heinz Body Anemias	monocyte	-0.356603	2	0.885	0.974	0
140700	Heinz Body Anemias	conventional dendritic cell	-0.363038	2	0.971	0.974	0
140700	Heinz Body Anemias	promyelocyte	-0.367215	2	0.96	0.974	0
140700	Heinz Body Anemias	neutrophilic myeloblast	-0.369065	2	0.934	0.974	0
140700	Heinz Body Anemias	neutrophilic metamyelocyte	-0.365754	2	0.609	0.974	0
140700	Heinz Body Anemias	band form neutrophil	-0.362642	2	0.467	0.974	0
140700	Heinz Body Anemias	segmented neutrophil of bone marrow	-0.370697	2	0.461	0.974	0
142680	Periodic Fever, Familial, Autosomal Dominant	proerythroblast	-0.964352	1	0.924	0.985	0
142680	Periodic Fever, Familial, Autosomal Dominant	reticulocyte	-0.87855	1	0.58	0.985	0
142680	Periodic Fever, Familial, Autosomal Dominant	erythroblast	-0.907385	1	0.635	0.985	0
142680	Periodic Fever, Familial, Autosomal Dominant	plasma cell	-0.957036	1	0.945	0.985	0
142680	Periodic Fever, Familial, Autosomal Dominant	early pro-B cell	-0.922159	1	0.985	0.985	0
142680	Periodic Fever, Familial, Autosomal Dominant	precursor B cell	-0.852266	1	0.981	0.985	0
142680	Periodic Fever, Familial, Autosomal Dominant	immature B cell	-0.918779	1	0.981	0.985	0
142680	Periodic Fever, Familial, Autosomal Dominant	basophil	-0.831646	1	0.958	0.985	0
142680	Periodic Fever, Familial, Autosomal Dominant	myelocyte	0.695123	1	0.119	0.34	0
142680	Periodic Fever, Familial, Autosomal Dominant	hematopoietic stem cell	-0.0708407	1	0.747	0.985	0
142680	Periodic Fever, Familial, Autosomal Dominant	macrophage	-0.173267	1	0.741	0.985	0
142680	Periodic Fever, Familial, Autosomal Dominant	T cell	-0.459273	1	0.785	0.985	0
142680	Periodic Fever, Familial, Autosomal Dominant	mature B cell	-0.668168	1	0.919	0.985	0
142680	Periodic Fever, Familial, Autosomal Dominant	monocyte	1.68001	1	0.044	0.22	0
142680	Periodic Fever, Familial, Autosomal Dominant	conventional dendritic cell	0.64294	1	0.185	0.4625	0
142680	Periodic Fever, Familial, Autosomal Dominant	promyelocyte	1.35108	1	0.04	0.22	0
142680	Periodic Fever, Familial, Autosomal Dominant	neutrophilic myeloblast	1.70443	1	0.026	0.22	0
142680	Periodic Fever, Familial, Autosomal Dominant	neutrophilic metamyelocyte	0.490496	1	0.055	0.22	0
142680	Periodic Fever, Familial, Autosomal Dominant	band form neutrophil	0.318465	1	0.076	0.253333	0
142680	Periodic Fever, Familial, Autosomal Dominant	segmented neutrophil of bone marrow	1.72119	1	0.035	0.22	0
PS147060	Hyper-IgE recurrent infection syndrome	proerythroblast	-1.21356	4	0.999	0.999	0
PS147060	Hyper-IgE recurrent infection syndrome	reticulocyte	-1.11085	4	0.777	0.999	0
PS147060	Hyper-IgE recurrent infection syndrome	erythroblast	-1.21202	4	0.893	0.999	0
PS147060	Hyper-IgE recurrent infection syndrome	plasma cell	-0.0716407	4	0.513	0.932727	0
PS147060	Hyper-IgE recurrent infection syndrome	early pro-B cell	-0.287023	4	0.93	0.999	0
PS147060	Hyper-IgE recurrent infection syndrome	precursor B cell	-0.671493	4	0.999	0.999	0
PS147060	Hyper-IgE recurrent infection syndrome	immature B cell	-0.801364	4	0.999	0.999	0
PS147060	Hyper-IgE recurrent infection syndrome	basophil	-0.730938	4	0.995	0.999	0
PS147060	Hyper-IgE recurrent infection syndrome	myelocyte	-0.488262	4	0.98	0.999	0
PS147060	Hyper-IgE recurrent infection syndrome	hematopoietic stem cell	0.463734	4	0.14	0.35	0
PS147060	Hyper-IgE recurrent infection syndrome	macrophage	0.490795	4	0.111	0.35	0
PS147060	Hyper-IgE recurrent infection syndrome	T cell	0.24723	4	0.077	0.308	0
PS147060	Hyper-IgE recurrent infection syndrome	mature B cell	0.154784	4	0.137	0.35	0
PS147060	Hyper-IgE recurrent infection syndrome	monocyte	1.61152	4	0.001	0.02	1
PS147060	Hyper-IgE recurrent infection syndrome	conventional dendritic cell	1.31318	4	0.005	0.0333333	1
PS147060	Hyper-IgE recurrent infection syndrome	promyelocyte	0.708765	4	0.026	0.13	0
PS147060	Hyper-IgE recurrent infection syndrome	neutrophilic myeloblast	1.18287	4	0.002	0.02	1
PS147060	Hyper-IgE recurrent infection syndrome	neutrophilic metamyelocyte	-0.344779	4	0.625	0.999	0
PS147060	Hyper-IgE recurrent infection syndrome	band form neutrophil	-0.304362	4	0.442	0.884	0
PS147060	Hyper-IgE recurrent infection syndrome	segmented neutrophil of bone marrow	-0.159927	4	0.31	0.688889	0
150550	Periodic Fever, Immunodeficiency, And Thrombocytopenia Syndrome	proerythroblast	-1.62436	1	0.996	0.996	0
150550	Periodic Fever, Immunodeficiency, And Thrombocytopenia Syndrome	reticulocyte	-1.70692	1	0.92	0.996	0
150550	Periodic Fever, Immunodeficiency, And Thrombocytopenia Syndrome	erythroblast	-1.8442	1	0.965	0.996	0
150550	Periodic Fever, Immunodeficiency, And Thrombocytopenia Syndrome	plasma cell	-0.675498	1	0.869	0.996	0
150550	Periodic Fever, Immunodeficiency, And Thrombocytopenia Syndrome	early pro-B cell	-0.377622	1	0.842	0.996	0
150550	Periodic Fever, Immunodeficiency, And Thrombocytopenia Syndrome	precursor B cell	-0.492154	1	0.91	0.996	0
150550	Periodic Fever, Immunodeficiency, And Thrombocytopenia Syndrome	immature B cell	-0.0422611	1	0.716	0.996	0
150550	Periodic Fever, Immunodeficiency, And Thrombocytopenia Syndrome	basophil	0.540771	1	0.165	0.4125	0
150550	Periodic Fever, Immunodeficiency, And Thrombocytopenia Syndrome	myelocyte	0.530858	1	0.155	0.4125	0
150550	Periodic Fever, Immunodeficiency, And Thrombocytopenia Syndrome	hematopoietic stem cell	-0.15716	1	0.802	0.996	0
150550	Periodic Fever, Immunodeficiency, And Thrombocytopenia Syndrome	macrophage	-0.199692	1	0.756	0.996	0
150550	Periodic Fever, Immunodeficiency, And Thrombocytopenia Syndrome	T cell	-0.55808	1	0.843	0.996	0
150550	Periodic Fever, Immunodeficiency, And Thrombocytopenia Syndrome	mature B cell	-0.295591	1	0.734	0.996	0
150550	Periodic Fever, Immunodeficiency, And Thrombocytopenia Syndrome	monocyte	0.345909	1	0.192	0.426667	0
150550	Periodic Fever, Immunodeficiency, And Thrombocytopenia Syndrome	conventional dendritic cell	0.967257	1	0.109	0.363333	0
150550	Periodic Fever, Immunodeficiency, And Thrombocytopenia Syndrome	promyelocyte	1.19338	1	0.042	0.25	0
150550	Periodic Fever, Immunodeficiency, And Thrombocytopenia Syndrome	neutrophilic myeloblast	1.68304	1	0.024	0.24	0
150550	Periodic Fever, Immunodeficiency, And Thrombocytopenia Syndrome	neutrophilic metamyelocyte	1.26061	1	0.013	0.24	0
150550	Periodic Fever, Immunodeficiency, And Thrombocytopenia Syndrome	band form neutrophil	1.05095	1	0.05	0.25	0
150550	Periodic Fever, Immunodeficiency, And Thrombocytopenia Syndrome	segmented neutrophil of bone marrow	0.400758	1	0.095	0.363333	0
PS151623	Li-Fraumeni syndrome	proerythroblast	-0.148023	1	0.56	0.962	0
PS151623	Li-Fraumeni syndrome	reticulocyte	-1.30356	1	0.727	0.962	0
PS151623	Li-Fraumeni syndrome	erythroblast	-0.928965	1	0.641	0.962	0
PS151623	Li-Fraumeni syndrome	plasma cell	-0.0108252	1	0.599	0.962	0
PS151623	Li-Fraumeni syndrome	early pro-B cell	2.02257	1	0.084	0.55	0
PS151623	Li-Fraumeni syndrome	precursor B cell	1.5446	1	0.054	0.54	0
PS151623	Li-Fraumeni syndrome	immature B cell	0.960496	1	0.209	0.633333	0
PS151623	Li-Fraumeni syndrome	basophil	0.00429748	1	0.282	0.633333	0
PS151623	Li-Fraumeni syndrome	myelocyte	0.150612	1	0.249	0.633333	0
PS151623	Li-Fraumeni syndrome	hematopoietic stem cell	1.68682	1	0.028	0.54	0
PS151623	Li-Fraumeni syndrome	macrophage	-0.0866009	1	0.71	0.962	0
PS151623	Li-Fraumeni syndrome	T cell	0.570418	1	0.11	0.55	0
PS151623	Li-Fraumeni syndrome	mature B cell	0.357024	1	0.195	0.633333	0
PS151623	Li-Fraumeni syndrome	monocyte	-0.66592	1	0.936	0.962	0
PS151623	Li-Fraumeni syndrome	conventional dendritic cell	0.0284087	1	0.432	0.864	0
PS151623	Li-Fraumeni syndrome	promyelocyte	0.19496	1	0.285	0.633333	0
PS151623	Li-Fraumeni syndrome	neutrophilic myeloblast	-0.577465	1	0.935	0.962	0
PS151623	Li-Fraumeni syndrome	neutrophilic metamyelocyte	-1.06567	1	0.962	0.962	0
PS151623	Li-Fraumeni syndrome	band form neutrophil	-1.3381	1	0.953	0.962	0
PS151623	Li-Fraumeni syndrome	segmented neutrophil of bone marrow	-1.39508	1	0.926	0.962	0
152700	Systemic Lupus Erythematosus	proerythroblast	-0.68922	5	0.946	0.998	0
152700	Systemic Lupus Erythematosus	reticulocyte	-0.705962	5	0.51	0.998	0
152700	Systemic Lupus Erythematosus	erythroblast	-0.728827	5	0.621	0.998	0
152700	Systemic Lupus Erythematosus	plasma cell	0.073245	5	0.112	0.448	0
152700	Systemic Lupus Erythematosus	early pro-B cell	-0.495312	5	0.984	0.998	0
152700	Systemic Lupus Erythematosus	precursor B cell	-0.640004	5	0.998	0.998	0
152700	Systemic Lupus Erythematosus	immature B cell	-0.674275	5	0.997	0.998	0
152700	Systemic Lupus Erythematosus	basophil	-0.315346	5	0.881	0.998	0
152700	Systemic Lupus Erythematosus	myelocyte	-0.0464367	5	0.741	0.998	0
152700	Systemic Lupus Erythematosus	hematopoietic stem cell	-0.308404	5	0.985	0.998	0
152700	Systemic Lupus Erythematosus	macrophage	-0.655903	5	0.998	0.998	0
152700	Systemic Lupus Erythematosus	T cell	-0.603662	5	0.983	0.998	0
152700	Systemic Lupus Erythematosus	mature B cell	0.420735	5	0.034	0.34	0
152700	Systemic Lupus Erythematosus	monocyte	1.27659	5	0.003	0.06	1
152700	Systemic Lupus Erythematosus	conventional dendritic cell	0.0160715	5	0.418	0.998	0
152700	Systemic Lupus Erythematosus	promyelocyte	0.471501	5	0.059	0.393333	0
152700	Systemic Lupus Erythematosus	neutrophilic myeloblast	0.385071	5	0.083	0.415	0
152700	Systemic Lupus Erythematosus	neutrophilic metamyelocyte	-0.22617	5	0.494	0.998	0
152700	Systemic Lupus Erythematosus	band form neutrophil	-0.315346	5	0.487	0.998	0
152700	Systemic Lupus Erythematosus	segmented neutrophil of bone marrow	-0.321562	5	0.518	0.998	0
154800	Mast Cell Disease	proerythroblast	-0.106373	1	0.547	0.9	0
154800	Mast Cell Disease	reticulocyte	-0.463173	1	0.406	0.9	0
154800	Mast Cell Disease	erythroblast	-0.521004	1	0.52	0.9	0
154800	Mast Cell Disease	plasma cell	-0.521004	1	0.777	0.9	0
154800	Mast Cell Disease	early pro-B cell	-0.0268748	1	0.726	0.9	0
154800	Mast Cell Disease	precursor B cell	-0.38917	1	0.863	0.9	0
154800	Mast Cell Disease	immature B cell	-0.463584	1	0.872	0.9	0
154800	Mast Cell Disease	basophil	0.0581852	1	0.251	0.9	0
154800	Mast Cell Disease	myelocyte	1.87588	1	0.028	0.28	0
154800	Mast Cell Disease	hematopoietic stem cell	3.55502	1	0.001	0.02	1
154800	Mast Cell Disease	macrophage	-0.478477	1	0.88	0.9	0
154800	Mast Cell Disease	T cell	-0.467182	1	0.781	0.9	0
154800	Mast Cell Disease	mature B cell	-0.521004	1	0.848	0.9	0
154800	Mast Cell Disease	monocyte	-0.477905	1	0.861	0.9	0
154800	Mast Cell Disease	conventional dendritic cell	0.212151	1	0.342	0.9	0
154800	Mast Cell Disease	promyelocyte	-0.333254	1	0.828	0.9	0
154800	Mast Cell Disease	neutrophilic myeloblast	-0.479284	1	0.9	0.9	0
154800	Mast Cell Disease	neutrophilic metamyelocyte	0.254398	1	0.083	0.553333	0
154800	Mast Cell Disease	band form neutrophil	-0.186342	1	0.462	0.9	0
154800	Mast Cell Disease	segmented neutrophil of bone marrow	-0.521004	1	0.638	0.9	0
PS158350	Cowden disease	proerythroblast	-1.06127	1	0.928	0.988	0
PS158350	Cowden disease	reticulocyte	-1.09753	1	0.634	0.988	0
PS158350	Cowden disease	erythroblast	-1.18387	1	0.733	0.988	0
PS158350	Cowden disease	plasma cell	-0.00865458	1	0.571	0.988	0
PS158350	Cowden disease	early pro-B cell	2.81228	1	0.03	0.46	0
PS158350	Cowden disease	precursor B cell	1.03643	1	0.15	0.6	0
PS158350	Cowden disease	immature B cell	0.720347	1	0.251	0.717143	0
PS158350	Cowden disease	basophil	-1.06096	1	0.988	0.988	0
PS158350	Cowden disease	myelocyte	-1.00206	1	0.98	0.988	0
PS158350	Cowden disease	hematopoietic stem cell	0.332664	1	0.311	0.722222	0
PS158350	Cowden disease	macrophage	0.548277	1	0.228	0.717143	0
PS158350	Cowden disease	T cell	-0.428507	1	0.786	0.988	0
PS158350	Cowden disease	mature B cell	0.933047	1	0.092	0.46	0
PS158350	Cowden disease	monocyte	-0.206121	1	0.665	0.988	0
PS158350	Cowden disease	conventional dendritic cell	0.221003	1	0.325	0.722222	0
PS158350	Cowden disease	promyelocyte	-0.477216	1	0.935	0.988	0
PS158350	Cowden disease	neutrophilic myeloblast	-0.372854	1	0.837	0.988	0
PS158350	Cowden disease	neutrophilic metamyelocyte	-0.825297	1	0.857	0.988	0
PS158350	Cowden disease	band form neutrophil	0.110932	1	0.086	0.46	0
PS158350	Cowden disease	segmented neutrophil of bone marrow	1.00936	1	0.057	0.46	0
159550	Ataxia-pancytopenia Syndrome	proerythroblast	-0.798043	1	0.826	0.96	0
159550	Ataxia-pancytopenia Syndrome	reticulocyte	-0.809312	1	0.514	0.96	0
159550	Ataxia-pancytopenia Syndrome	erythroblast	-0.684642	1	0.546	0.96	0
159550	Ataxia-pancytopenia Syndrome	plasma cell	-0.939722	1	0.944	0.96	0
159550	Ataxia-pancytopenia Syndrome	early pro-B cell	-0.587018	1	0.911	0.96	0
159550	Ataxia-pancytopenia Syndrome	precursor B cell	-0.445473	1	0.854	0.96	0
159550	Ataxia-pancytopenia Syndrome	immature B cell	-0.629447	1	0.917	0.96	0
159550	Ataxia-pancytopenia Syndrome	basophil	0.265825	1	0.203	0.676667	0
159550	Ataxia-pancytopenia Syndrome	myelocyte	-0.729752	1	0.96	0.96	0
159550	Ataxia-pancytopenia Syndrome	hematopoietic stem cell	-0.546246	1	0.958	0.96	0
159550	Ataxia-pancytopenia Syndrome	macrophage	0.044483	1	0.368	0.92	0
159550	Ataxia-pancytopenia Syndrome	T cell	-0.239116	1	0.651	0.96	0
159550	Ataxia-pancytopenia Syndrome	mature B cell	0.977793	1	0.071	0.39	0
159550	Ataxia-pancytopenia Syndrome	monocyte	0.583753	1	0.148	0.592	0
159550	Ataxia-pancytopenia Syndrome	conventional dendritic cell	0.355296	1	0.306	0.874286	0
159550	Ataxia-pancytopenia Syndrome	promyelocyte	-0.496762	1	0.93	0.96	0
159550	Ataxia-pancytopenia Syndrome	neutrophilic myeloblast	-0.548513	1	0.926	0.96	0
159550	Ataxia-pancytopenia Syndrome	neutrophilic metamyelocyte	0.250486	1	0.078	0.39	0
159550	Ataxia-pancytopenia Syndrome	band form neutrophil	2.34582	1	0.005	0.1	1
159550	Ataxia-pancytopenia Syndrome	segmented neutrophil of bone marrow	2.63059	1	0.015	0.15	0
162800	Cyclic Hematopoiesis	proerythroblast	-0.261778	1	0.595	0.862	0
162800	Cyclic Hematopoiesis	reticulocyte	-0.235661	1	0.393	0.862	0
162800	Cyclic Hematopoiesis	erythroblast	-0.24283	1	0.421	0.862	0
162800	Cyclic Hematopoiesis	plasma cell	-0.236434	1	0.648	0.862	0
162800	Cyclic Hematopoiesis	early pro-B cell	-0.264215	1	0.787	0.862	0
162800	Cyclic Hematopoiesis	precursor B cell	-0.269286	1	0.797	0.862	0
162800	Cyclic Hematopoiesis	immature B cell	-0.271186	1	0.764	0.862	0
162800	Cyclic Hematopoiesis	basophil	-0.256818	1	0.712	0.862	0
162800	Cyclic Hematopoiesis	myelocyte	4.22369	1	0	0	1
162800	Cyclic Hematopoiesis	hematopoietic stem cell	-0.247904	1	0.845	0.862	0
162800	Cyclic Hematopoiesis	macrophage	-0.266938	1	0.777	0.862	0
162800	Cyclic Hematopoiesis	T cell	-0.268163	1	0.671	0.862	0
162800	Cyclic Hematopoiesis	mature B cell	-0.264028	1	0.728	0.862	0
162800	Cyclic Hematopoiesis	monocyte	-0.262808	1	0.707	0.862	0
162800	Cyclic Hematopoiesis	conventional dendritic cell	-0.27156	1	0.862	0.862	0
162800	Cyclic Hematopoiesis	promyelocyte	0.210453	1	0.255	0.862	0
162800	Cyclic Hematopoiesis	neutrophilic myeloblast	-0.181439	1	0.736	0.862	0
162800	Cyclic Hematopoiesis	neutrophilic metamyelocyte	-0.12288	1	0.444	0.862	0
162800	Cyclic Hematopoiesis	band form neutrophil	-0.262459	1	0.473	0.862	0
162800	Cyclic Hematopoiesis	segmented neutrophil of bone marrow	-0.247751	1	0.463	0.862	0
PS163950	Noonan syndrome	proerythroblast	-0.13255	6	0.545	0.930667	0
PS163950	Noonan syndrome	reticulocyte	-1.78187	6	0.999	0.999	0
PS163950	Noonan syndrome	erythroblast	-1.65534	6	0.999	0.999	0
PS163950	Noonan syndrome	plasma cell	0.276782	6	0.06	0.2775	0
PS163950	Noonan syndrome	early pro-B cell	0.723844	6	0.078	0.2775	0
PS163950	Noonan syndrome	precursor B cell	1.14478	6	0.006	0.12	0
PS163950	Noonan syndrome	immature B cell	0.898837	6	0.046	0.2775	0
PS163950	Noonan syndrome	basophil	-9.25091e-05	6	0.576	0.930667	0
PS163950	Noonan syndrome	myelocyte	-0.216335	6	0.882	0.999	0
PS163950	Noonan syndrome	hematopoietic stem cell	0.440641	6	0.098	0.2775	0
PS163950	Noonan syndrome	macrophage	0.301982	6	0.125	0.277778	0
PS163950	Noonan syndrome	T cell	-0.161055	6	0.688	0.930667	0
PS163950	Noonan syndrome	mature B cell	0.351895	6	0.026	0.26	0
PS163950	Noonan syndrome	monocyte	-0.0747443	6	0.669	0.930667	0
PS163950	Noonan syndrome	conventional dendritic cell	0.417702	6	0.089	0.2775	0
PS163950	Noonan syndrome	promyelocyte	0.0853373	6	0.248	0.496	0
PS163950	Noonan syndrome	neutrophilic myeloblast	0.269227	6	0.111	0.2775	0
PS163950	Noonan syndrome	neutrophilic metamyelocyte	-0.374674	6	0.698	0.930667	0
PS163950	Noonan syndrome	band form neutrophil	-0.726794	6	0.843	0.999	0
PS163950	Noonan syndrome	segmented neutrophil of bone marrow	-0.909625	6	0.931	0.999	0
PS607634	Osteopetrosis, autosomal dominant	proerythroblast	-0.772574	1	0.868	0.98	0
PS607634	Osteopetrosis, autosomal dominant	reticulocyte	-0.854067	1	0.567	0.98	0
PS607634	Osteopetrosis, autosomal dominant	erythroblast	-0.200903	1	0.418	0.98	0
PS607634	Osteopetrosis, autosomal dominant	plasma cell	-0.0677563	1	0.598	0.98	0
PS607634	Osteopetrosis, autosomal dominant	early pro-B cell	-0.0908999	1	0.723	0.98	0
PS607634	Osteopetrosis, autosomal dominant	precursor B cell	0.0964962	1	0.384	0.98	0
PS607634	Osteopetrosis, autosomal dominant	immature B cell	-0.395695	1	0.843	0.98	0
PS607634	Osteopetrosis, autosomal dominant	basophil	-0.564155	1	0.896	0.98	0
PS607634	Osteopetrosis, autosomal dominant	myelocyte	-0.666561	1	0.934	0.98	0
PS607634	Osteopetrosis, autosomal dominant	hematopoietic stem cell	-0.611757	1	0.975	0.98	0
PS607634	Osteopetrosis, autosomal dominant	macrophage	-0.359072	1	0.839	0.98	0
PS607634	Osteopetrosis, autosomal dominant	T cell	-0.997229	1	0.98	0.98	0
PS607634	Osteopetrosis, autosomal dominant	mature B cell	1.68596	1	0.025	0.25	0
PS607634	Osteopetrosis, autosomal dominant	monocyte	1.03167	1	0.101	0.505	0
PS607634	Osteopetrosis, autosomal dominant	conventional dendritic cell	0.323454	1	0.308	0.98	0
PS607634	Osteopetrosis, autosomal dominant	promyelocyte	-0.646239	1	0.975	0.98	0
PS607634	Osteopetrosis, autosomal dominant	neutrophilic myeloblast	-0.411572	1	0.871	0.98	0
PS607634	Osteopetrosis, autosomal dominant	neutrophilic metamyelocyte	-0.38162	1	0.61	0.98	0
PS607634	Osteopetrosis, autosomal dominant	band form neutrophil	0.734344	1	0.05	0.333333	0
PS607634	Osteopetrosis, autosomal dominant	segmented neutrophil of bone marrow	3.14818	1	0.005	0.1	1
166900	Ovalocytosis, Hereditary Hemolytic	proerythroblast	2.22375	1	0.035	0.233333	0
166900	Ovalocytosis, Hereditary Hemolytic	reticulocyte	0.524468	1	0.019	0.19	0
166900	Ovalocytosis, Hereditary Hemolytic	erythroblast	3.39943	1	0.008	0.16	0
166900	Ovalocytosis, Hereditary Hemolytic	plasma cell	-0.351341	1	0.719	0.912	0
166900	Ovalocytosis, Hereditary Hemolytic	early pro-B cell	-0.369016	1	0.821	0.912	0
166900	Ovalocytosis, Hereditary Hemolytic	precursor B cell	-0.361777	1	0.813	0.912	0
166900	Ovalocytosis, Hereditary Hemolytic	immature B cell	-0.366259	1	0.833	0.912	0
166900	Ovalocytosis, Hereditary Hemolytic	basophil	-0.357117	1	0.778	0.912	0
166900	Ovalocytosis, Hereditary Hemolytic	myelocyte	-0.362688	1	0.8	0.912	0
166900	Ovalocytosis, Hereditary Hemolytic	hematopoietic stem cell	-0.358017	1	0.9	0.912	0
166900	Ovalocytosis, Hereditary Hemolytic	macrophage	-0.362531	1	0.824	0.912	0
166900	Ovalocytosis, Hereditary Hemolytic	T cell	-0.350646	1	0.717	0.912	0
166900	Ovalocytosis, Hereditary Hemolytic	mature B cell	-0.372814	1	0.778	0.912	0
166900	Ovalocytosis, Hereditary Hemolytic	monocyte	-0.362837	1	0.783	0.912	0
166900	Ovalocytosis, Hereditary Hemolytic	conventional dendritic cell	-0.358987	1	0.912	0.912	0
166900	Ovalocytosis, Hereditary Hemolytic	promyelocyte	-0.367042	1	0.877	0.912	0
166900	Ovalocytosis, Hereditary Hemolytic	neutrophilic myeloblast	-0.362065	1	0.844	0.912	0
166900	Ovalocytosis, Hereditary Hemolytic	neutrophilic metamyelocyte	-0.360278	1	0.598	0.912	0
166900	Ovalocytosis, Hereditary Hemolytic	band form neutrophil	-0.367569	1	0.528	0.912	0
166900	Ovalocytosis, Hereditary Hemolytic	segmented neutrophil of bone marrow	-0.356669	1	0.526	0.912	0
169400	Pelger-huet Anomaly	proerythroblast	2.52437	1	0.026	0.476	0
169400	Pelger-huet Anomaly	reticulocyte	-1.28082	1	0.72	0.988	0
169400	Pelger-huet Anomaly	erythroblast	-0.466675	1	0.477	0.867273	0
169400	Pelger-huet Anomaly	plasma cell	-1.08204	1	0.961	0.988	0
169400	Pelger-huet Anomaly	early pro-B cell	-0.595339	1	0.918	0.988	0
169400	Pelger-huet Anomaly	precursor B cell	0.297038	1	0.324	0.76	0
169400	Pelger-huet Anomaly	immature B cell	2.3218	1	0.062	0.476	0
169400	Pelger-huet Anomaly	basophil	0.292564	1	0.196	0.653333	0
169400	Pelger-huet Anomaly	myelocyte	-0.346559	1	0.8	0.988	0
169400	Pelger-huet Anomaly	hematopoietic stem cell	-0.635338	1	0.988	0.988	0
169400	Pelger-huet Anomaly	macrophage	-0.812609	1	0.985	0.988	0
169400	Pelger-huet Anomaly	T cell	-0.713041	1	0.93	0.988	0
169400	Pelger-huet Anomaly	mature B cell	-0.710319	1	0.938	0.988	0
169400	Pelger-huet Anomaly	monocyte	-0.476028	1	0.851	0.988	0
169400	Pelger-huet Anomaly	conventional dendritic cell	0.209549	1	0.342	0.76	0
169400	Pelger-huet Anomaly	promyelocyte	0.284957	1	0.256	0.731429	0
169400	Pelger-huet Anomaly	neutrophilic myeloblast	0.979204	1	0.119	0.476	0
169400	Pelger-huet Anomaly	neutrophilic metamyelocyte	0.275416	1	0.086	0.476	0
169400	Pelger-huet Anomaly	band form neutrophil	-0.249613	1	0.473	0.867273	0
169400	Pelger-huet Anomaly	segmented neutrophil of bone marrow	0.183476	1	0.112	0.476	0
170100	Prolidase Deficiency	proerythroblast	-0.929377	1	0.895	0.963158	0
170100	Prolidase Deficiency	reticulocyte	0.135271	1	0.019	0.19	0
170100	Prolidase Deficiency	erythroblast	-0.904561	1	0.61	0.963158	0
170100	Prolidase Deficiency	plasma cell	0.432374	1	0.192	0.577143	0
170100	Prolidase Deficiency	early pro-B cell	-0.186599	1	0.744	0.963158	0
170100	Prolidase Deficiency	precursor B cell	-0.558739	1	0.915	0.963158	0
170100	Prolidase Deficiency	immature B cell	-0.775072	1	0.964	0.964	0
170100	Prolidase Deficiency	basophil	3.06977	1	0.016	0.19	0
170100	Prolidase Deficiency	myelocyte	-0.187115	1	0.685	0.963158	0
170100	Prolidase Deficiency	hematopoietic stem cell	-0.0724516	1	0.769	0.963158	0
170100	Prolidase Deficiency	macrophage	0.830111	1	0.157	0.577143	0
170100	Prolidase Deficiency	T cell	-0.35826	1	0.748	0.963158	0
170100	Prolidase Deficiency	mature B cell	-0.210666	1	0.632	0.963158	0
170100	Prolidase Deficiency	monocyte	0.468014	1	0.16	0.577143	0
170100	Prolidase Deficiency	conventional dendritic cell	1.51908	1	0.041	0.273333	0
170100	Prolidase Deficiency	promyelocyte	0.466724	1	0.202	0.577143	0
170100	Prolidase Deficiency	neutrophilic myeloblast	0.268543	1	0.26	0.65	0
170100	Prolidase Deficiency	neutrophilic metamyelocyte	-0.935325	1	0.905	0.963158	0
170100	Prolidase Deficiency	band form neutrophil	-1.00407	1	0.81	0.963158	0
170100	Prolidase Deficiency	segmented neutrophil of bone marrow	-1.06765	1	0.801	0.963158	0
PS162000	Tubulointerstitial kidney disease	proerythroblast	-0.415595	1	0.705	0.863333	0
PS162000	Tubulointerstitial kidney disease	reticulocyte	-0.835314	1	0.547	0.854667	0
PS162000	Tubulointerstitial kidney disease	erythroblast	-0.810295	1	0.564	0.854667	0
PS162000	Tubulointerstitial kidney disease	plasma cell	3.81886	1	0.013	0.26	0
PS162000	Tubulointerstitial kidney disease	early pro-B cell	-0.635285	1	0.923	0.923	0
PS162000	Tubulointerstitial kidney disease	precursor B cell	-0.207739	1	0.777	0.863333	0
PS162000	Tubulointerstitial kidney disease	immature B cell	-0.306603	1	0.769	0.863333	0
PS162000	Tubulointerstitial kidney disease	basophil	0.10106	1	0.246	0.854667	0
PS162000	Tubulointerstitial kidney disease	myelocyte	0.302438	1	0.212	0.854667	0
PS162000	Tubulointerstitial kidney disease	hematopoietic stem cell	0.055613	1	0.391	0.854667	0
PS162000	Tubulointerstitial kidney disease	macrophage	0.756197	1	0.158	0.854667	0
PS162000	Tubulointerstitial kidney disease	T cell	-0.69579	1	0.904	0.923	0
PS162000	Tubulointerstitial kidney disease	mature B cell	-0.0995403	1	0.63	0.854667	0
PS162000	Tubulointerstitial kidney disease	monocyte	0.00113317	1	0.29	0.854667	0
PS162000	Tubulointerstitial kidney disease	conventional dendritic cell	0.0343385	1	0.448	0.854667	0
PS162000	Tubulointerstitial kidney disease	promyelocyte	0.500147	1	0.186	0.854667	0
PS162000	Tubulointerstitial kidney disease	neutrophilic myeloblast	0.0906371	1	0.34	0.854667	0
PS162000	Tubulointerstitial kidney disease	neutrophilic metamyelocyte	-0.487908	1	0.641	0.854667	0
PS162000	Tubulointerstitial kidney disease	band form neutrophil	-0.57705	1	0.613	0.854667	0
PS162000	Tubulointerstitial kidney disease	segmented neutrophil of bone marrow	-0.589306	1	0.606	0.854667	0
174900	Juvenile Polyposis Syndrome Juvenile Intestinal Polyposis Polyposis, Familial, Of Entire Gastrointestinal Tract Juvenile Polyposis Of Stomach, Included Juvenile Polyposis Coli, Included	proerythroblast	-1.27795	1	0.96	0.992	0
174900	Juvenile Polyposis Syndrome Juvenile Intestinal Polyposis Polyposis, Familial, Of Entire Gastrointestinal Tract Juvenile Polyposis Of Stomach, Included Juvenile Polyposis Coli, Included	reticulocyte	-1.47897	1	0.847	0.992	0
174900	Juvenile Polyposis Syndrome Juvenile Intestinal Polyposis Polyposis, Familial, Of Entire Gastrointestinal Tract Juvenile Polyposis Of Stomach, Included Juvenile Polyposis Coli, Included	erythroblast	-1.41008	1	0.847	0.992	0
174900	Juvenile Polyposis Syndrome Juvenile Intestinal Polyposis Polyposis, Familial, Of Entire Gastrointestinal Tract Juvenile Polyposis Of Stomach, Included Juvenile Polyposis Coli, Included	plasma cell	1.92825	1	0.066	0.328	0
174900	Juvenile Polyposis Syndrome Juvenile Intestinal Polyposis Polyposis, Familial, Of Entire Gastrointestinal Tract Juvenile Polyposis Of Stomach, Included Juvenile Polyposis Coli, Included	early pro-B cell	0.271057	1	0.346	0.788889	0
174900	Juvenile Polyposis Syndrome Juvenile Intestinal Polyposis Polyposis, Familial, Of Entire Gastrointestinal Tract Juvenile Polyposis Of Stomach, Included Juvenile Polyposis Coli, Included	precursor B cell	-0.262966	1	0.776	0.992	0
174900	Juvenile Polyposis Syndrome Juvenile Intestinal Polyposis Polyposis, Familial, Of Entire Gastrointestinal Tract Juvenile Polyposis Of Stomach, Included Juvenile Polyposis Coli, Included	immature B cell	-0.0386077	1	0.714	0.992	0
174900	Juvenile Polyposis Syndrome Juvenile Intestinal Polyposis Polyposis, Familial, Of Entire Gastrointestinal Tract Juvenile Polyposis Of Stomach, Included Juvenile Polyposis Coli, Included	basophil	-0.322915	1	0.742	0.992	0
174900	Juvenile Polyposis Syndrome Juvenile Intestinal Polyposis Polyposis, Familial, Of Entire Gastrointestinal Tract Juvenile Polyposis Of Stomach, Included Juvenile Polyposis Coli, Included	myelocyte	-1.1347	1	0.992	0.992	0
174900	Juvenile Polyposis Syndrome Juvenile Intestinal Polyposis Polyposis, Familial, Of Entire Gastrointestinal Tract Juvenile Polyposis Of Stomach, Included Juvenile Polyposis Coli, Included	hematopoietic stem cell	0.14119	1	0.355	0.788889	0
174900	Juvenile Polyposis Syndrome Juvenile Intestinal Polyposis Polyposis, Familial, Of Entire Gastrointestinal Tract Juvenile Polyposis Of Stomach, Included Juvenile Polyposis Coli, Included	macrophage	1.312	1	0.08	0.328	0
174900	Juvenile Polyposis Syndrome Juvenile Intestinal Polyposis Polyposis, Familial, Of Entire Gastrointestinal Tract Juvenile Polyposis Of Stomach, Included Juvenile Polyposis Coli, Included	T cell	0.739227	1	0.082	0.328	0
174900	Juvenile Polyposis Syndrome Juvenile Intestinal Polyposis Polyposis, Familial, Of Entire Gastrointestinal Tract Juvenile Polyposis Of Stomach, Included Juvenile Polyposis Coli, Included	mature B cell	1.02365	1	0.068	0.328	0
174900	Juvenile Polyposis Syndrome Juvenile Intestinal Polyposis Polyposis, Familial, Of Entire Gastrointestinal Tract Juvenile Polyposis Of Stomach, Included Juvenile Polyposis Coli, Included	monocyte	0.672938	1	0.129	0.43	0
174900	Juvenile Polyposis Syndrome Juvenile Intestinal Polyposis Polyposis, Familial, Of Entire Gastrointestinal Tract Juvenile Polyposis Of Stomach, Included Juvenile Polyposis Coli, Included	conventional dendritic cell	1.43896	1	0.044	0.328	0
174900	Juvenile Polyposis Syndrome Juvenile Intestinal Polyposis Polyposis, Familial, Of Entire Gastrointestinal Tract Juvenile Polyposis Of Stomach, Included Juvenile Polyposis Coli, Included	promyelocyte	-0.296764	1	0.828	0.992	0
174900	Juvenile Polyposis Syndrome Juvenile Intestinal Polyposis Polyposis, Familial, Of Entire Gastrointestinal Tract Juvenile Polyposis Of Stomach, Included Juvenile Polyposis Coli, Included	neutrophilic myeloblast	0.577411	1	0.192	0.548571	0
174900	Juvenile Polyposis Syndrome Juvenile Intestinal Polyposis Polyposis, Familial, Of Entire Gastrointestinal Tract Juvenile Polyposis Of Stomach, Included Juvenile Polyposis Coli, Included	neutrophilic metamyelocyte	-0.967386	1	0.92	0.992	0
174900	Juvenile Polyposis Syndrome Juvenile Intestinal Polyposis Polyposis, Familial, Of Entire Gastrointestinal Tract Juvenile Polyposis Of Stomach, Included Juvenile Polyposis Coli, Included	band form neutrophil	-0.846203	1	0.737	0.992	0
174900	Juvenile Polyposis Syndrome Juvenile Intestinal Polyposis Polyposis, Familial, Of Entire Gastrointestinal Tract Juvenile Polyposis Of Stomach, Included Juvenile Polyposis Coli, Included	segmented neutrophil of bone marrow	-0.068151	1	0.432	0.864	0
175050	Juvenile Polyposis/hereditary Hemorrhagic Telangiectasia Syndrome	proerythroblast	-1.27795	1	0.974	0.989	0
175050	Juvenile Polyposis/hereditary Hemorrhagic Telangiectasia Syndrome	reticulocyte	-1.47897	1	0.829	0.981176	0
175050	Juvenile Polyposis/hereditary Hemorrhagic Telangiectasia Syndrome	erythroblast	-1.41008	1	0.834	0.981176	0
175050	Juvenile Polyposis/hereditary Hemorrhagic Telangiectasia Syndrome	plasma cell	1.92825	1	0.058	0.372	0
175050	Juvenile Polyposis/hereditary Hemorrhagic Telangiectasia Syndrome	early pro-B cell	0.271057	1	0.309	0.7725	0
175050	Juvenile Polyposis/hereditary Hemorrhagic Telangiectasia Syndrome	precursor B cell	-0.262966	1	0.795	0.981176	0
175050	Juvenile Polyposis/hereditary Hemorrhagic Telangiectasia Syndrome	immature B cell	-0.0386077	1	0.713	0.981176	0
175050	Juvenile Polyposis/hereditary Hemorrhagic Telangiectasia Syndrome	basophil	-0.322915	1	0.742	0.981176	0
175050	Juvenile Polyposis/hereditary Hemorrhagic Telangiectasia Syndrome	myelocyte	-1.1347	1	0.989	0.989	0
175050	Juvenile Polyposis/hereditary Hemorrhagic Telangiectasia Syndrome	hematopoietic stem cell	0.14119	1	0.398	0.884444	0
175050	Juvenile Polyposis/hereditary Hemorrhagic Telangiectasia Syndrome	macrophage	1.312	1	0.093	0.372	0
175050	Juvenile Polyposis/hereditary Hemorrhagic Telangiectasia Syndrome	T cell	0.739227	1	0.085	0.372	0
175050	Juvenile Polyposis/hereditary Hemorrhagic Telangiectasia Syndrome	mature B cell	1.02365	1	0.084	0.372	0
175050	Juvenile Polyposis/hereditary Hemorrhagic Telangiectasia Syndrome	monocyte	0.672938	1	0.143	0.476667	0
175050	Juvenile Polyposis/hereditary Hemorrhagic Telangiectasia Syndrome	conventional dendritic cell	1.43896	1	0.044	0.372	0
175050	Juvenile Polyposis/hereditary Hemorrhagic Telangiectasia Syndrome	promyelocyte	-0.296764	1	0.821	0.981176	0
175050	Juvenile Polyposis/hereditary Hemorrhagic Telangiectasia Syndrome	neutrophilic myeloblast	0.577411	1	0.172	0.491429	0
175050	Juvenile Polyposis/hereditary Hemorrhagic Telangiectasia Syndrome	neutrophilic metamyelocyte	-0.967386	1	0.926	0.989	0
175050	Juvenile Polyposis/hereditary Hemorrhagic Telangiectasia Syndrome	band form neutrophil	-0.846203	1	0.73	0.981176	0
175050	Juvenile Polyposis/hereditary Hemorrhagic Telangiectasia Syndrome	segmented neutrophil of bone marrow	-0.068151	1	0.447	0.894	0
175200	Peutz-jeghers Syndrome	proerythroblast	2.76194	1	0.02	0.36	0
175200	Peutz-jeghers Syndrome	reticulocyte	-1.91535	1	0.958	0.995	0
175200	Peutz-jeghers Syndrome	erythroblast	1.58426	1	0.036	0.36	0
175200	Peutz-jeghers Syndrome	plasma cell	-0.283491	1	0.662	0.995	0
175200	Peutz-jeghers Syndrome	early pro-B cell	0.100179	1	0.37	0.822222	0
175200	Peutz-jeghers Syndrome	precursor B cell	-0.248979	1	0.775	0.995	0
175200	Peutz-jeghers Syndrome	immature B cell	0.852232	1	0.207	0.81	0
175200	Peutz-jeghers Syndrome	basophil	0.458398	1	0.152	0.81	0
175200	Peutz-jeghers Syndrome	myelocyte	0.376465	1	0.163	0.81	0
175200	Peutz-jeghers Syndrome	hematopoietic stem cell	0.365631	1	0.297	0.81	0
175200	Peutz-jeghers Syndrome	macrophage	-0.130216	1	0.724	0.995	0
175200	Peutz-jeghers Syndrome	T cell	-1.01077	1	0.982	0.995	0
175200	Peutz-jeghers Syndrome	mature B cell	-0.686286	1	0.928	0.995	0
175200	Peutz-jeghers Syndrome	monocyte	-0.923772	1	0.995	0.995	0
175200	Peutz-jeghers Syndrome	conventional dendritic cell	-0.11586	1	0.798	0.995	0
175200	Peutz-jeghers Syndrome	promyelocyte	0.306245	1	0.246	0.81	0
175200	Peutz-jeghers Syndrome	neutrophilic myeloblast	0.105418	1	0.324	0.81	0
175200	Peutz-jeghers Syndrome	neutrophilic metamyelocyte	-0.220749	1	0.489	0.892727	0
175200	Peutz-jeghers Syndrome	band form neutrophil	-1.10794	1	0.858	0.995	0
175200	Peutz-jeghers Syndrome	segmented neutrophil of bone marrow	-0.267355	1	0.491	0.892727	0
PS188050	Thrombophilia	proerythroblast	-0.620321	4	0.92	0.995	0
PS188050	Thrombophilia	reticulocyte	-0.525538	4	0.394	0.995	0
PS188050	Thrombophilia	erythroblast	-0.614488	4	0.557	0.995	0
PS188050	Thrombophilia	plasma cell	-0.540626	4	0.928	0.995	0
PS188050	Thrombophilia	early pro-B cell	-0.503575	4	0.982	0.995	0
PS188050	Thrombophilia	precursor B cell	-0.493423	4	0.987	0.995	0
PS188050	Thrombophilia	immature B cell	-0.527603	4	0.989	0.995	0
PS188050	Thrombophilia	basophil	-0.680922	4	0.995	0.995	0
PS188050	Thrombophilia	myelocyte	-0.246963	4	0.859	0.995	0
PS188050	Thrombophilia	hematopoietic stem cell	0.284474	4	0.29	0.995	0
PS188050	Thrombophilia	macrophage	-0.433715	4	0.983	0.995	0
PS188050	Thrombophilia	T cell	-0.463498	4	0.941	0.995	0
PS188050	Thrombophilia	mature B cell	-0.541425	4	0.966	0.995	0
PS188050	Thrombophilia	monocyte	1.3036	4	0.004	0.04	1
PS188050	Thrombophilia	conventional dendritic cell	0.254254	4	0.268	0.995	0
PS188050	Thrombophilia	promyelocyte	1.16967	4	0.002	0.04	1
PS188050	Thrombophilia	neutrophilic myeloblast	1.17738	4	0.008	0.0533333	1
PS188050	Thrombophilia	neutrophilic metamyelocyte	-0.523312	4	0.823	0.995	0
PS188050	Thrombophilia	band form neutrophil	-0.540605	4	0.663	0.995	0
PS188050	Thrombophilia	segmented neutrophil of bone marrow	-0.52139	4	0.668	0.995	0
PS177000	Protoporphyria, erythropoietic	proerythroblast	1.6432	3	0.018	0.12	0
PS177000	Protoporphyria, erythropoietic	reticulocyte	2.01457	3	0.001	0.02	1
PS177000	Protoporphyria, erythropoietic	erythroblast	2.89661	3	0.002	0.02	1
PS177000	Protoporphyria, erythropoietic	plasma cell	-0.384175	3	0.802	0.979	0
PS177000	Protoporphyria, erythropoietic	early pro-B cell	-0.397094	3	0.938	0.979	0
PS177000	Protoporphyria, erythropoietic	precursor B cell	-0.391402	3	0.945	0.979	0
PS177000	Protoporphyria, erythropoietic	immature B cell	-0.39619	3	0.93	0.979	0
PS177000	Protoporphyria, erythropoietic	basophil	-0.386729	3	0.894	0.979	0
PS177000	Protoporphyria, erythropoietic	myelocyte	-0.377822	3	0.916	0.979	0
PS177000	Protoporphyria, erythropoietic	hematopoietic stem cell	-0.356278	3	0.972	0.979	0
PS177000	Protoporphyria, erythropoietic	macrophage	-0.39595	3	0.934	0.979	0
PS177000	Protoporphyria, erythropoietic	T cell	-0.362499	3	0.835	0.979	0
PS177000	Protoporphyria, erythropoietic	mature B cell	-0.378389	3	0.862	0.979	0
PS177000	Protoporphyria, erythropoietic	monocyte	-0.388159	3	0.895	0.979	0
PS177000	Protoporphyria, erythropoietic	conventional dendritic cell	-0.386006	3	0.979	0.979	0
PS177000	Protoporphyria, erythropoietic	promyelocyte	-0.393874	3	0.967	0.979	0
PS177000	Protoporphyria, erythropoietic	neutrophilic myeloblast	-0.390023	3	0.941	0.979	0
PS177000	Protoporphyria, erythropoietic	neutrophilic metamyelocyte	-0.407725	3	0.666	0.979	0
PS177000	Protoporphyria, erythropoietic	band form neutrophil	-0.428215	3	0.541	0.979	0
PS177000	Protoporphyria, erythropoietic	segmented neutrophil of bone marrow	-0.427314	3	0.595	0.979	0
180200	Retinoblastoma	proerythroblast	3.67075	1	0.005	0.1	1
180200	Retinoblastoma	reticulocyte	-0.704611	1	0.521	0.976	0
180200	Retinoblastoma	erythroblast	0.936201	1	0.042	0.42	0
180200	Retinoblastoma	plasma cell	-0.195188	1	0.628	0.976	0
180200	Retinoblastoma	early pro-B cell	-0.19822	1	0.761	0.976	0
180200	Retinoblastoma	precursor B cell	0.160666	1	0.336	0.976	0
180200	Retinoblastoma	immature B cell	0.964302	1	0.22	0.976	0
180200	Retinoblastoma	basophil	-0.0329136	1	0.631	0.976	0
180200	Retinoblastoma	myelocyte	-0.775718	1	0.961	0.976	0
180200	Retinoblastoma	hematopoietic stem cell	-0.611744	1	0.976	0.976	0
180200	Retinoblastoma	macrophage	-0.191172	1	0.746	0.976	0
180200	Retinoblastoma	T cell	-0.883732	1	0.965	0.976	0
180200	Retinoblastoma	mature B cell	-0.395316	1	0.766	0.976	0
180200	Retinoblastoma	monocyte	0.0276241	1	0.264	0.976	0
180200	Retinoblastoma	conventional dendritic cell	-0.375348	1	0.899	0.976	0
180200	Retinoblastoma	promyelocyte	-0.507261	1	0.935	0.976	0
180200	Retinoblastoma	neutrophilic myeloblast	0.317926	1	0.265	0.976	0
180200	Retinoblastoma	neutrophilic metamyelocyte	-0.0772462	1	0.46	0.976	0
180200	Retinoblastoma	band form neutrophil	-0.677144	1	0.648	0.976	0
180200	Retinoblastoma	segmented neutrophil of bone marrow	-0.451856	1	0.565	0.976	0
PS300751	Anemia, Sideroblastic	proerythroblast	1.99119	4	0	0	1
PS300751	Anemia, Sideroblastic	reticulocyte	0.302205	4	0.002	0.0133333	0
PS300751	Anemia, Sideroblastic	erythroblast	2.39757	4	0	0	1
PS300751	Anemia, Sideroblastic	plasma cell	-0.369419	4	0.849	0.981	0
PS300751	Anemia, Sideroblastic	early pro-B cell	-0.331781	4	0.955	0.981	0
PS300751	Anemia, Sideroblastic	precursor B cell	-0.346795	4	0.97	0.981	0
PS300751	Anemia, Sideroblastic	immature B cell	-0.360168	4	0.947	0.981	0
PS300751	Anemia, Sideroblastic	basophil	-0.332398	4	0.91	0.981	0
PS300751	Anemia, Sideroblastic	myelocyte	-0.30371	4	0.895	0.981	0
PS300751	Anemia, Sideroblastic	hematopoietic stem cell	-0.283225	4	0.974	0.981	0
PS300751	Anemia, Sideroblastic	macrophage	-0.296844	4	0.937	0.981	0
PS300751	Anemia, Sideroblastic	T cell	-0.361098	4	0.866	0.981	0
PS300751	Anemia, Sideroblastic	mature B cell	-0.394514	4	0.919	0.981	0
PS300751	Anemia, Sideroblastic	monocyte	-0.390971	4	0.947	0.981	0
PS300751	Anemia, Sideroblastic	conventional dendritic cell	-0.28968	4	0.981	0.981	0
PS300751	Anemia, Sideroblastic	promyelocyte	-0.330299	4	0.976	0.981	0
PS300751	Anemia, Sideroblastic	neutrophilic myeloblast	-0.401948	4	0.98	0.981	0
PS300751	Anemia, Sideroblastic	neutrophilic metamyelocyte	-0.442618	4	0.736	0.981	0
PS300751	Anemia, Sideroblastic	band form neutrophil	-0.463029	4	0.603	0.981	0
PS300751	Anemia, Sideroblastic	segmented neutrophil of bone marrow	-0.470097	4	0.595	0.981	0
182900	Spherocytosis, Hereditary	proerythroblast	3.41698	1	0.011	0.193333	0
182900	Spherocytosis, Hereditary	reticulocyte	0.0181627	1	0.024	0.193333	0
182900	Spherocytosis, Hereditary	erythroblast	2.31793	1	0.029	0.193333	0
182900	Spherocytosis, Hereditary	plasma cell	-0.348414	1	0.689	0.899	0
182900	Spherocytosis, Hereditary	early pro-B cell	-0.348414	1	0.833	0.899	0
182900	Spherocytosis, Hereditary	precursor B cell	-0.348414	1	0.824	0.899	0
182900	Spherocytosis, Hereditary	immature B cell	-0.348414	1	0.816	0.899	0
182900	Spherocytosis, Hereditary	basophil	-0.348414	1	0.758	0.899	0
182900	Spherocytosis, Hereditary	myelocyte	-0.329138	1	0.785	0.899	0
182900	Spherocytosis, Hereditary	hematopoietic stem cell	-0.312569	1	0.878	0.899	0
182900	Spherocytosis, Hereditary	macrophage	-0.310134	1	0.807	0.899	0
182900	Spherocytosis, Hereditary	T cell	-0.297561	1	0.695	0.899	0
182900	Spherocytosis, Hereditary	mature B cell	-0.348414	1	0.735	0.899	0
182900	Spherocytosis, Hereditary	monocyte	-0.344778	1	0.775	0.899	0
182900	Spherocytosis, Hereditary	conventional dendritic cell	-0.348414	1	0.899	0.899	0
182900	Spherocytosis, Hereditary	promyelocyte	-0.342428	1	0.86	0.899	0
182900	Spherocytosis, Hereditary	neutrophilic myeloblast	-0.337691	1	0.833	0.899	0
182900	Spherocytosis, Hereditary	neutrophilic metamyelocyte	-0.343039	1	0.571	0.899	0
182900	Spherocytosis, Hereditary	band form neutrophil	-0.348414	1	0.499	0.899	0
182900	Spherocytosis, Hereditary	segmented neutrophil of bone marrow	-0.348414	1	0.504	0.899	0
185000	Overhydrated Hereditary Stomatocytosis	proerythroblast	2.4793	1	0.03	0.3	0
185000	Overhydrated Hereditary Stomatocytosis	reticulocyte	-0.198994	1	0.341	0.877	0
185000	Overhydrated Hereditary Stomatocytosis	erythroblast	3.31248	1	0.02	0.3	0
185000	Overhydrated Hereditary Stomatocytosis	plasma cell	-0.336071	1	0.711	0.877	0
185000	Overhydrated Hereditary Stomatocytosis	early pro-B cell	-0.336071	1	0.807	0.877	0
185000	Overhydrated Hereditary Stomatocytosis	precursor B cell	-0.336071	1	0.834	0.877	0
185000	Overhydrated Hereditary Stomatocytosis	immature B cell	-0.327454	1	0.801	0.877	0
185000	Overhydrated Hereditary Stomatocytosis	basophil	-0.336071	1	0.78	0.877	0
185000	Overhydrated Hereditary Stomatocytosis	myelocyte	-0.32543	1	0.764	0.877	0
185000	Overhydrated Hereditary Stomatocytosis	hematopoietic stem cell	-0.306112	1	0.865	0.877	0
185000	Overhydrated Hereditary Stomatocytosis	macrophage	-0.330647	1	0.812	0.877	0
185000	Overhydrated Hereditary Stomatocytosis	T cell	-0.323398	1	0.698	0.877	0
185000	Overhydrated Hereditary Stomatocytosis	mature B cell	-0.336071	1	0.771	0.877	0
185000	Overhydrated Hereditary Stomatocytosis	monocyte	-0.322821	1	0.759	0.877	0
185000	Overhydrated Hereditary Stomatocytosis	conventional dendritic cell	-0.331906	1	0.877	0.877	0
185000	Overhydrated Hereditary Stomatocytosis	promyelocyte	-0.327176	1	0.846	0.877	0
185000	Overhydrated Hereditary Stomatocytosis	neutrophilic myeloblast	-0.326005	1	0.843	0.877	0
185000	Overhydrated Hereditary Stomatocytosis	neutrophilic metamyelocyte	-0.325635	1	0.548	0.877	0
185000	Overhydrated Hereditary Stomatocytosis	band form neutrophil	-0.329786	1	0.468	0.877	0
185000	Overhydrated Hereditary Stomatocytosis	segmented neutrophil of bone marrow	-0.336071	1	0.51	0.877	0
185020	Cryohydrocytosis	proerythroblast	2.22375	1	0.047	0.313333	0
185020	Cryohydrocytosis	reticulocyte	0.524468	1	0.014	0.14	0
185020	Cryohydrocytosis	erythroblast	3.39943	1	0.007	0.14	0
185020	Cryohydrocytosis	plasma cell	-0.351341	1	0.715	0.89	0
185020	Cryohydrocytosis	early pro-B cell	-0.369016	1	0.841	0.89	0
185020	Cryohydrocytosis	precursor B cell	-0.361777	1	0.848	0.89	0
185020	Cryohydrocytosis	immature B cell	-0.366259	1	0.835	0.89	0
185020	Cryohydrocytosis	basophil	-0.357117	1	0.746	0.89	0
185020	Cryohydrocytosis	myelocyte	-0.362688	1	0.772	0.89	0
185020	Cryohydrocytosis	hematopoietic stem cell	-0.358017	1	0.89	0.89	0
185020	Cryohydrocytosis	macrophage	-0.362531	1	0.825	0.89	0
185020	Cryohydrocytosis	T cell	-0.350646	1	0.73	0.89	0
185020	Cryohydrocytosis	mature B cell	-0.372814	1	0.786	0.89	0
185020	Cryohydrocytosis	monocyte	-0.362837	1	0.778	0.89	0
185020	Cryohydrocytosis	conventional dendritic cell	-0.358987	1	0.888	0.89	0
185020	Cryohydrocytosis	promyelocyte	-0.367042	1	0.882	0.89	0
185020	Cryohydrocytosis	neutrophilic myeloblast	-0.362065	1	0.847	0.89	0
185020	Cryohydrocytosis	neutrophilic metamyelocyte	-0.360278	1	0.573	0.89	0
185020	Cryohydrocytosis	band form neutrophil	-0.367569	1	0.505	0.89	0
185020	Cryohydrocytosis	segmented neutrophil of bone marrow	-0.356669	1	0.484	0.89	0
185070	Stormorken Syndrome	proerythroblast	-0.565623	1	0.767	0.95875	0
185070	Stormorken Syndrome	reticulocyte	-1.97558	1	0.97	0.997	0
185070	Stormorken Syndrome	erythroblast	-2.13938	1	0.996	0.997	0
185070	Stormorken Syndrome	plasma cell	0.294203	1	0.196	0.444615	0
185070	Stormorken Syndrome	early pro-B cell	2.26357	1	0.062	0.425	0
185070	Stormorken Syndrome	precursor B cell	0.441097	1	0.284	0.444615	0
185070	Stormorken Syndrome	immature B cell	0.809993	1	0.225	0.444615	0
185070	Stormorken Syndrome	basophil	-1.38224	1	0.997	0.997	0
185070	Stormorken Syndrome	myelocyte	0.140268	1	0.258	0.444615	0
185070	Stormorken Syndrome	hematopoietic stem cell	0.10436	1	0.402	0.574286	0
185070	Stormorken Syndrome	macrophage	-0.501854	1	0.894	0.997	0
185070	Stormorken Syndrome	T cell	1.11748	1	0.058	0.425	0
185070	Stormorken Syndrome	mature B cell	0.315039	1	0.193	0.444615	0
185070	Stormorken Syndrome	monocyte	-0.296458	1	0.72	0.95875	0
185070	Stormorken Syndrome	conventional dendritic cell	0.606203	1	0.188	0.444615	0
185070	Stormorken Syndrome	promyelocyte	0.220154	1	0.282	0.444615	0
185070	Stormorken Syndrome	neutrophilic myeloblast	0.176612	1	0.289	0.444615	0
185070	Stormorken Syndrome	neutrophilic metamyelocyte	0.222462	1	0.085	0.425	0
185070	Stormorken Syndrome	band form neutrophil	0.110229	1	0.081	0.425	0
185070	Stormorken Syndrome	segmented neutrophil of bone marrow	0.0394663	1	0.125	0.444615	0
PS187300	Telangiectasia, hereditary hemorrhagic	proerythroblast	0.0227641	2	0.322	0.92	0
PS187300	Telangiectasia, hereditary hemorrhagic	reticulocyte	-0.398837	2	0.256	0.853333	0
PS187300	Telangiectasia, hereditary hemorrhagic	erythroblast	-0.491813	2	0.428	0.943	0
PS187300	Telangiectasia, hereditary hemorrhagic	plasma cell	-0.564542	2	0.901	0.943	0
PS187300	Telangiectasia, hereditary hemorrhagic	early pro-B cell	1.52013	2	0.089	0.593333	0
PS187300	Telangiectasia, hereditary hemorrhagic	precursor B cell	-0.123395	2	0.732	0.943	0
PS187300	Telangiectasia, hereditary hemorrhagic	immature B cell	-0.469383	2	0.943	0.943	0
PS187300	Telangiectasia, hereditary hemorrhagic	basophil	-0.443473	2	0.912	0.943	0
PS187300	Telangiectasia, hereditary hemorrhagic	myelocyte	-0.311237	2	0.842	0.943	0
PS187300	Telangiectasia, hereditary hemorrhagic	hematopoietic stem cell	0.553609	2	0.227	0.853333	0
PS187300	Telangiectasia, hereditary hemorrhagic	macrophage	-0.222598	2	0.815	0.943	0
PS187300	Telangiectasia, hereditary hemorrhagic	T cell	-0.545863	2	0.927	0.943	0
PS187300	Telangiectasia, hereditary hemorrhagic	mature B cell	-0.515768	2	0.925	0.943	0
PS187300	Telangiectasia, hereditary hemorrhagic	monocyte	-0.00899888	2	0.475	0.943	0
PS187300	Telangiectasia, hereditary hemorrhagic	conventional dendritic cell	0.522702	2	0.184	0.853333	0
PS187300	Telangiectasia, hereditary hemorrhagic	promyelocyte	0.00512995	2	0.492	0.943	0
PS187300	Telangiectasia, hereditary hemorrhagic	neutrophilic myeloblast	-0.168158	2	0.756	0.943	0
PS187300	Telangiectasia, hereditary hemorrhagic	neutrophilic metamyelocyte	-0.519924	2	0.761	0.943	0
PS187300	Telangiectasia, hereditary hemorrhagic	band form neutrophil	0.664622	2	0.041	0.41	0
PS187300	Telangiectasia, hereditary hemorrhagic	segmented neutrophil of bone marrow	1.49504	2	0.017	0.34	0
PS187950	Thrombocythemia	proerythroblast	-0.0709579	2	0.478	0.937	0
PS187950	Thrombocythemia	reticulocyte	-0.492608	2	0.305	0.937	0
PS187950	Thrombocythemia	erythroblast	-0.263397	2	0.299	0.937	0
PS187950	Thrombocythemia	plasma cell	-0.542487	2	0.896	0.937	0
PS187950	Thrombocythemia	early pro-B cell	-0.348284	2	0.912	0.937	0
PS187950	Thrombocythemia	precursor B cell	-0.36938	2	0.937	0.937	0
PS187950	Thrombocythemia	immature B cell	-0.364401	2	0.905	0.937	0
PS187950	Thrombocythemia	basophil	1.71415	2	0.026	0.26	0
PS187950	Thrombocythemia	myelocyte	-0.391262	2	0.92	0.937	0
PS187950	Thrombocythemia	hematopoietic stem cell	2.40757	2	0	0	1
PS187950	Thrombocythemia	macrophage	0.467953	2	0.26	0.937	0
PS187950	Thrombocythemia	T cell	-0.129621	2	0.571	0.937	0
PS187950	Thrombocythemia	mature B cell	-0.347817	2	0.818	0.937	0
PS187950	Thrombocythemia	monocyte	-0.1927	2	0.69	0.937	0
PS187950	Thrombocythemia	conventional dendritic cell	0.335509	2	0.313	0.937	0
PS187950	Thrombocythemia	promyelocyte	-0.215395	2	0.839	0.937	0
PS187950	Thrombocythemia	neutrophilic myeloblast	-0.179045	2	0.794	0.937	0
PS187950	Thrombocythemia	neutrophilic metamyelocyte	-0.365251	2	0.589	0.937	0
PS187950	Thrombocythemia	band form neutrophil	-0.382525	2	0.49	0.937	0
PS187950	Thrombocythemia	segmented neutrophil of bone marrow	-0.270053	2	0.418	0.937	0
PS313900	Thrombocytopenia	proerythroblast	-0.349015	6	0.793	0.971	0
PS313900	Thrombocytopenia	reticulocyte	-1.3816	6	0.954	0.971	0
PS313900	Thrombocytopenia	erythroblast	-0.996217	6	0.84	0.971	0
PS313900	Thrombocytopenia	plasma cell	-0.114904	6	0.648	0.971	0
PS313900	Thrombocytopenia	early pro-B cell	-0.209311	6	0.941	0.971	0
PS313900	Thrombocytopenia	precursor B cell	0.424174	6	0.149	0.331111	0
PS313900	Thrombocytopenia	immature B cell	0.645301	6	0.103	0.331111	0
PS313900	Thrombocytopenia	basophil	-0.40213	6	0.971	0.971	0
PS313900	Thrombocytopenia	myelocyte	0.188674	6	0.088	0.331111	0
PS313900	Thrombocytopenia	hematopoietic stem cell	0.404393	6	0.098	0.331111	0
PS313900	Thrombocytopenia	macrophage	0.312747	6	0.117	0.331111	0
PS313900	Thrombocytopenia	T cell	0.181939	6	0.049	0.331111	0
PS313900	Thrombocytopenia	mature B cell	-0.127361	6	0.708	0.971	0
PS313900	Thrombocytopenia	monocyte	0.27602	6	0.07	0.331111	0
PS313900	Thrombocytopenia	conventional dendritic cell	0.637409	6	0.027	0.331111	0
PS313900	Thrombocytopenia	promyelocyte	0.190926	6	0.138	0.331111	0
PS313900	Thrombocytopenia	neutrophilic myeloblast	0.170173	6	0.174	0.348	0
PS313900	Thrombocytopenia	neutrophilic metamyelocyte	-0.513792	6	0.857	0.971	0
PS313900	Thrombocytopenia	band form neutrophil	-0.739365	6	0.854	0.971	0
PS313900	Thrombocytopenia	segmented neutrophil of bone marrow	-0.396902	6	0.564	0.971	0
191900	Muckle-wells Syndrome	proerythroblast	-0.711827	1	0.835	0.984	0
191900	Muckle-wells Syndrome	reticulocyte	-0.635494	1	0.49	0.984	0
191900	Muckle-wells Syndrome	erythroblast	-0.552784	1	0.506	0.984	0
191900	Muckle-wells Syndrome	plasma cell	-0.065434	1	0.583	0.984	0
191900	Muckle-wells Syndrome	early pro-B cell	-0.721556	1	0.938	0.984	0
191900	Muckle-wells Syndrome	precursor B cell	-0.721556	1	0.962	0.984	0
191900	Muckle-wells Syndrome	immature B cell	-0.701699	1	0.936	0.984	0
191900	Muckle-wells Syndrome	basophil	0.82197	1	0.104	0.416	0
191900	Muckle-wells Syndrome	myelocyte	-0.626098	1	0.928	0.984	0
191900	Muckle-wells Syndrome	hematopoietic stem cell	-0.603734	1	0.984	0.984	0
191900	Muckle-wells Syndrome	macrophage	-0.320201	1	0.815	0.984	0
191900	Muckle-wells Syndrome	T cell	-0.413044	1	0.796	0.984	0
191900	Muckle-wells Syndrome	mature B cell	-0.461116	1	0.824	0.984	0
191900	Muckle-wells Syndrome	monocyte	2.35585	1	0.018	0.2	0
191900	Muckle-wells Syndrome	conventional dendritic cell	-0.209996	1	0.834	0.984	0
191900	Muckle-wells Syndrome	promyelocyte	1.01892	1	0.054	0.335	0
191900	Muckle-wells Syndrome	neutrophilic myeloblast	1.19944	1	0.067	0.335	0
191900	Muckle-wells Syndrome	neutrophilic metamyelocyte	-0.64007	1	0.768	0.984	0
191900	Muckle-wells Syndrome	band form neutrophil	-0.396906	1	0.543	0.984	0
191900	Muckle-wells Syndrome	segmented neutrophil of bone marrow	2.38534	1	0.02	0.2	0
193300	Von Hippel-lindau Syndrome	proerythroblast	-0.746396	2	0.918	0.964	0
193300	Von Hippel-lindau Syndrome	reticulocyte	-0.698419	2	0.486	0.881429	0
193300	Von Hippel-lindau Syndrome	erythroblast	-0.647695	2	0.526	0.881429	0
193300	Von Hippel-lindau Syndrome	plasma cell	-0.712166	2	0.964	0.964	0
193300	Von Hippel-lindau Syndrome	early pro-B cell	0.358313	2	0.402	0.881429	0
193300	Von Hippel-lindau Syndrome	precursor B cell	-0.449889	2	0.946	0.964	0
193300	Von Hippel-lindau Syndrome	immature B cell	0.0189927	2	0.58	0.881429	0
193300	Von Hippel-lindau Syndrome	basophil	-0.189765	2	0.69	0.92	0
193300	Von Hippel-lindau Syndrome	myelocyte	-0.348289	2	0.865	0.964	0
193300	Von Hippel-lindau Syndrome	hematopoietic stem cell	0.0413232	2	0.577	0.881429	0
193300	Von Hippel-lindau Syndrome	macrophage	1.96749	2	0.013	0.13	0
193300	Von Hippel-lindau Syndrome	T cell	-0.431947	2	0.842	0.964	0
193300	Von Hippel-lindau Syndrome	mature B cell	-0.173734	2	0.617	0.881429	0
193300	Von Hippel-lindau Syndrome	monocyte	0.255336	2	0.245	0.881429	0
193300	Von Hippel-lindau Syndrome	conventional dendritic cell	2.17485	2	0.002	0.04	1
193300	Von Hippel-lindau Syndrome	promyelocyte	0.0928771	2	0.444	0.881429	0
193300	Von Hippel-lindau Syndrome	neutrophilic myeloblast	0.0548787	2	0.48	0.881429	0
193300	Von Hippel-lindau Syndrome	neutrophilic metamyelocyte	-0.0563983	2	0.262	0.881429	0
193300	Von Hippel-lindau Syndrome	band form neutrophil	-0.169804	2	0.292	0.881429	0
193300	Von Hippel-lindau Syndrome	segmented neutrophil of bone marrow	-0.339566	2	0.472	0.881429	0
193670	Whim Syndrome	proerythroblast	-0.821195	1	0.862	0.993	0
193670	Whim Syndrome	reticulocyte	-1.15582	1	0.681	0.993	0
193670	Whim Syndrome	erythroblast	-1.02141	1	0.683	0.993	0
193670	Whim Syndrome	plasma cell	-0.30617	1	0.669	0.993	0
193670	Whim Syndrome	early pro-B cell	-0.259814	1	0.77	0.993	0
193670	Whim Syndrome	precursor B cell	-0.358125	1	0.857	0.993	0
193670	Whim Syndrome	immature B cell	0.691873	1	0.272	0.777143	0
193670	Whim Syndrome	basophil	0.641726	1	0.129	0.43	0
193670	Whim Syndrome	myelocyte	-0.583345	1	0.911	0.993	0
193670	Whim Syndrome	hematopoietic stem cell	-0.786538	1	0.993	0.993	0
193670	Whim Syndrome	macrophage	-0.582912	1	0.935	0.993	0
193670	Whim Syndrome	T cell	-0.961382	1	0.977	0.993	0
193670	Whim Syndrome	mature B cell	-0.286628	1	0.717	0.993	0
193670	Whim Syndrome	monocyte	-0.491544	1	0.858	0.993	0
193670	Whim Syndrome	conventional dendritic cell	-0.140455	1	0.813	0.993	0
193670	Whim Syndrome	promyelocyte	0.679521	1	0.124	0.43	0
193670	Whim Syndrome	neutrophilic myeloblast	2.26346	1	0.017	0.213333	0
193670	Whim Syndrome	neutrophilic metamyelocyte	0.0933971	1	0.099	0.43	0
193670	Whim Syndrome	band form neutrophil	1.03089	1	0.031	0.213333	0
193670	Whim Syndrome	segmented neutrophil of bone marrow	2.35447	1	0.032	0.213333	0
200150	Choreoacanthocytosis	proerythroblast	0.0445781	1	0.235	0.5875	0
200150	Choreoacanthocytosis	reticulocyte	-1.29651	1	0.726	0.986	0
200150	Choreoacanthocytosis	erythroblast	-1.1537	1	0.724	0.986	0
200150	Choreoacanthocytosis	plasma cell	-0.983511	1	0.95	0.986	0
200150	Choreoacanthocytosis	early pro-B cell	1.86673	1	0.1	0.4	0
200150	Choreoacanthocytosis	precursor B cell	1.31472	1	0.087	0.4	0
200150	Choreoacanthocytosis	immature B cell	1.03671	1	0.194	0.554286	0
200150	Choreoacanthocytosis	basophil	-0.411584	1	0.815	0.986	0
200150	Choreoacanthocytosis	myelocyte	-0.295136	1	0.764	0.986	0
200150	Choreoacanthocytosis	hematopoietic stem cell	1.28748	1	0.075	0.4	0
200150	Choreoacanthocytosis	macrophage	1.50536	1	0.078	0.4	0
200150	Choreoacanthocytosis	T cell	0.883203	1	0.08	0.4	0
200150	Choreoacanthocytosis	mature B cell	0.396246	1	0.149	0.496667	0
200150	Choreoacanthocytosis	monocyte	-0.746115	1	0.963	0.986	0
200150	Choreoacanthocytosis	conventional dendritic cell	0.14427	1	0.348	0.773333	0
200150	Choreoacanthocytosis	promyelocyte	-0.330505	1	0.849	0.986	0
200150	Choreoacanthocytosis	neutrophilic myeloblast	-0.81079	1	0.986	0.986	0
200150	Choreoacanthocytosis	neutrophilic metamyelocyte	-0.405773	1	0.578	0.986	0
200150	Choreoacanthocytosis	band form neutrophil	-1.10167	1	0.866	0.986	0
200150	Choreoacanthocytosis	segmented neutrophil of bone marrow	-0.943992	1	0.737	0.986	0
PS202700	Neutropenia, severe congenital	proerythroblast	-0.41363	10	0.9	0.983	0
PS202700	Neutropenia, severe congenital	reticulocyte	-1.25753	10	0.943	0.983	0
PS202700	Neutropenia, severe congenital	erythroblast	-0.963685	10	0.872	0.983	0
PS202700	Neutropenia, severe congenital	plasma cell	0.569883	10	0.005	0.07	0
PS202700	Neutropenia, severe congenital	early pro-B cell	0.0508766	10	0.325	0.8125	0
PS202700	Neutropenia, severe congenital	precursor B cell	0.332641	10	0.092	0.365714	0
PS202700	Neutropenia, severe congenital	immature B cell	-0.0763916	10	0.899	0.983	0
PS202700	Neutropenia, severe congenital	basophil	-0.175573	10	0.902	0.983	0
PS202700	Neutropenia, severe congenital	myelocyte	0.45258	10	0.007	0.07	0
PS202700	Neutropenia, severe congenital	hematopoietic stem cell	0.281028	10	0.127	0.365714	0
PS202700	Neutropenia, severe congenital	macrophage	0.196182	10	0.097	0.365714	0
PS202700	Neutropenia, severe congenital	T cell	-0.307066	10	0.919	0.983	0
PS202700	Neutropenia, severe congenital	mature B cell	-0.123002	10	0.771	0.983	0
PS202700	Neutropenia, severe congenital	monocyte	-0.0535528	10	0.728	0.983	0
PS202700	Neutropenia, severe congenital	conventional dendritic cell	0.257715	10	0.113	0.365714	0
PS202700	Neutropenia, severe congenital	promyelocyte	0.12519	10	0.128	0.365714	0
PS202700	Neutropenia, severe congenital	neutrophilic myeloblast	-0.10862	10	0.907	0.983	0
PS202700	Neutropenia, severe congenital	neutrophilic metamyelocyte	-0.687559	10	0.983	0.983	0
PS202700	Neutropenia, severe congenital	band form neutrophil	-0.824321	10	0.953	0.983	0
PS202700	Neutropenia, severe congenital	segmented neutrophil of bone marrow	-0.672235	10	0.85	0.983	0
PS203300	Hermansky-Pudlak syndrome	proerythroblast	-0.938635	7	0.998	0.998	0
PS203300	Hermansky-Pudlak syndrome	reticulocyte	-1.5711	7	0.993	0.998	0
PS203300	Hermansky-Pudlak syndrome	erythroblast	-1.28954	7	0.965	0.998	0
PS203300	Hermansky-Pudlak syndrome	plasma cell	-0.202043	7	0.77	0.998	0
PS203300	Hermansky-Pudlak syndrome	early pro-B cell	0.156945	7	0.229	0.508889	0
PS203300	Hermansky-Pudlak syndrome	precursor B cell	-0.393563	7	0.99	0.998	0
PS203300	Hermansky-Pudlak syndrome	immature B cell	0.416641	7	0.13	0.371429	0
PS203300	Hermansky-Pudlak syndrome	basophil	0.527891	7	0.023	0.115	0
PS203300	Hermansky-Pudlak syndrome	myelocyte	-0.498099	7	0.992	0.998	0
PS203300	Hermansky-Pudlak syndrome	hematopoietic stem cell	0.278374	7	0.153	0.3825	0
PS203300	Hermansky-Pudlak syndrome	macrophage	1.08489	7	0.004	0.0333333	1
PS203300	Hermansky-Pudlak syndrome	T cell	-0.180271	7	0.711	0.998	0
PS203300	Hermansky-Pudlak syndrome	mature B cell	-0.0926223	7	0.731	0.998	0
PS203300	Hermansky-Pudlak syndrome	monocyte	1.01512	7	0.002	0.0333333	1
PS203300	Hermansky-Pudlak syndrome	conventional dendritic cell	0.998694	7	0.005	0.0333333	0
PS203300	Hermansky-Pudlak syndrome	promyelocyte	0.455239	7	0.039	0.156	0
PS203300	Hermansky-Pudlak syndrome	neutrophilic myeloblast	0.179266	7	0.115	0.371429	0
PS203300	Hermansky-Pudlak syndrome	neutrophilic metamyelocyte	-0.639157	7	0.944	0.998	0
PS203300	Hermansky-Pudlak syndrome	band form neutrophil	-0.702549	7	0.831	0.998	0
PS203300	Hermansky-Pudlak syndrome	segmented neutrophil of bone marrow	-0.843706	7	0.902	0.998	0
PS256730	Ceroid lipofuscinoses	proerythroblast	-1.2284	1	0.97	0.995	0
PS256730	Ceroid lipofuscinoses	reticulocyte	-1.21064	1	0.689	0.995	0
PS256730	Ceroid lipofuscinoses	erythroblast	-1.30927	1	0.794	0.995	0
PS256730	Ceroid lipofuscinoses	plasma cell	0.844493	1	0.135	0.54	0
PS256730	Ceroid lipofuscinoses	early pro-B cell	-0.378581	1	0.837	0.995	0
PS256730	Ceroid lipofuscinoses	precursor B cell	-1.02703	1	0.995	0.995	0
PS256730	Ceroid lipofuscinoses	immature B cell	-1.08763	1	0.991	0.995	0
PS256730	Ceroid lipofuscinoses	basophil	0.938159	1	0.096	0.48	0
PS256730	Ceroid lipofuscinoses	myelocyte	-0.728496	1	0.943	0.995	0
PS256730	Ceroid lipofuscinoses	hematopoietic stem cell	-0.599256	1	0.978	0.995	0
PS256730	Ceroid lipofuscinoses	macrophage	0.299194	1	0.306	0.68	0
PS256730	Ceroid lipofuscinoses	T cell	0.140994	1	0.221	0.565	0
PS256730	Ceroid lipofuscinoses	mature B cell	-0.109815	1	0.623	0.995	0
PS256730	Ceroid lipofuscinoses	monocyte	1.51212	1	0.058	0.386667	0
PS256730	Ceroid lipofuscinoses	conventional dendritic cell	0.118401	1	0.38	0.76	0
PS256730	Ceroid lipofuscinoses	promyelocyte	0.47346	1	0.193	0.565	0
PS256730	Ceroid lipofuscinoses	neutrophilic myeloblast	0.396012	1	0.226	0.565	0
PS256730	Ceroid lipofuscinoses	neutrophilic metamyelocyte	-0.452854	1	0.638	0.995	0
PS256730	Ceroid lipofuscinoses	band form neutrophil	1.14428	1	0.041	0.386667	0
PS256730	Ceroid lipofuscinoses	segmented neutrophil of bone marrow	2.26486	1	0.016	0.32	0
PS206100	Anemia, hypochromic microcytic, with iron overload	proerythroblast	3.5244	2	0	0	1
PS206100	Anemia, hypochromic microcytic, with iron overload	reticulocyte	-0.541911	2	0.387	0.987	0
PS206100	Anemia, hypochromic microcytic, with iron overload	erythroblast	-0.057257	2	0.207	0.987	0
PS206100	Anemia, hypochromic microcytic, with iron overload	plasma cell	-0.210893	2	0.635	0.987	0
PS206100	Anemia, hypochromic microcytic, with iron overload	early pro-B cell	0.900699	2	0.232	0.987	0
PS206100	Anemia, hypochromic microcytic, with iron overload	precursor B cell	0.382961	2	0.34	0.987	0
PS206100	Anemia, hypochromic microcytic, with iron overload	immature B cell	0.752513	2	0.26	0.987	0
PS206100	Anemia, hypochromic microcytic, with iron overload	basophil	-0.420356	2	0.879	0.987	0
PS206100	Anemia, hypochromic microcytic, with iron overload	myelocyte	-0.196693	2	0.706	0.987	0
PS206100	Anemia, hypochromic microcytic, with iron overload	hematopoietic stem cell	-0.0336591	2	0.742	0.987	0
PS206100	Anemia, hypochromic microcytic, with iron overload	macrophage	-0.584476	2	0.987	0.987	0
PS206100	Anemia, hypochromic microcytic, with iron overload	T cell	-0.256389	2	0.693	0.987	0
PS206100	Anemia, hypochromic microcytic, with iron overload	mature B cell	-0.516188	2	0.943	0.987	0
PS206100	Anemia, hypochromic microcytic, with iron overload	monocyte	-0.182108	2	0.678	0.987	0
PS206100	Anemia, hypochromic microcytic, with iron overload	conventional dendritic cell	-0.33704	2	0.973	0.987	0
PS206100	Anemia, hypochromic microcytic, with iron overload	promyelocyte	-0.154332	2	0.786	0.987	0
PS206100	Anemia, hypochromic microcytic, with iron overload	neutrophilic myeloblast	-0.219059	2	0.803	0.987	0
PS206100	Anemia, hypochromic microcytic, with iron overload	neutrophilic metamyelocyte	-0.59537	2	0.832	0.987	0
PS206100	Anemia, hypochromic microcytic, with iron overload	band form neutrophil	-0.627419	2	0.701	0.987	0
PS206100	Anemia, hypochromic microcytic, with iron overload	segmented neutrophil of bone marrow	-0.627419	2	0.676	0.987	0
208400	Aspartylglucosaminuria	proerythroblast	-1.17372	1	0.949	0.949	0
208400	Aspartylglucosaminuria	reticulocyte	-0.994633	1	0.576	0.889474	0
208400	Aspartylglucosaminuria	erythroblast	-1.4045	1	0.845	0.889474	0
208400	Aspartylglucosaminuria	plasma cell	3.1237	1	0.023	0.46	0
208400	Aspartylglucosaminuria	early pro-B cell	0.323524	1	0.342	0.8625	0
208400	Aspartylglucosaminuria	precursor B cell	-0.34657	1	0.842	0.889474	0
208400	Aspartylglucosaminuria	immature B cell	-0.101151	1	0.738	0.889474	0
208400	Aspartylglucosaminuria	basophil	0.489505	1	0.154	0.77	0
208400	Aspartylglucosaminuria	myelocyte	0.322702	1	0.218	0.793333	0
208400	Aspartylglucosaminuria	hematopoietic stem cell	0.148116	1	0.345	0.8625	0
208400	Aspartylglucosaminuria	macrophage	1.50123	1	0.069	0.69	0
208400	Aspartylglucosaminuria	T cell	-0.284452	1	0.671	0.889474	0
208400	Aspartylglucosaminuria	mature B cell	-0.285135	1	0.687	0.889474	0
208400	Aspartylglucosaminuria	monocyte	0.183467	1	0.238	0.793333	0
208400	Aspartylglucosaminuria	conventional dendritic cell	0.0305627	1	0.414	0.889474	0
208400	Aspartylglucosaminuria	promyelocyte	0.62842	1	0.127	0.77	0
208400	Aspartylglucosaminuria	neutrophilic myeloblast	-0.155273	1	0.697	0.889474	0
208400	Aspartylglucosaminuria	neutrophilic metamyelocyte	-0.678671	1	0.781	0.889474	0
208400	Aspartylglucosaminuria	band form neutrophil	-0.877442	1	0.728	0.889474	0
208400	Aspartylglucosaminuria	segmented neutrophil of bone marrow	-0.449675	1	0.559	0.889474	0
208900	Ataxia-telangiectasia	proerythroblast	-0.742865	1	0.832	0.93	0
208900	Ataxia-telangiectasia	reticulocyte	-1.13907	1	0.67	0.93	0
208900	Ataxia-telangiectasia	erythroblast	-0.997058	1	0.679	0.93	0
208900	Ataxia-telangiectasia	plasma cell	-0.0171923	1	0.587	0.93	0
208900	Ataxia-telangiectasia	early pro-B cell	-0.577736	1	0.917	0.965263	0
208900	Ataxia-telangiectasia	precursor B cell	0.984524	1	0.162	0.54	0
208900	Ataxia-telangiectasia	immature B cell	0.0244609	1	0.38	0.93	0
208900	Ataxia-telangiectasia	basophil	-0.230489	1	0.696	0.93	0
208900	Ataxia-telangiectasia	myelocyte	0.532095	1	0.147	0.54	0
208900	Ataxia-telangiectasia	hematopoietic stem cell	1.77764	1	0.031	0.293333	0
208900	Ataxia-telangiectasia	macrophage	2.23918	1	0.044	0.293333	0
208900	Ataxia-telangiectasia	T cell	1.41929	1	0.035	0.293333	0
208900	Ataxia-telangiectasia	mature B cell	0.749384	1	0.121	0.54	0
208900	Ataxia-telangiectasia	monocyte	-0.379157	1	0.814	0.93	0
208900	Ataxia-telangiectasia	conventional dendritic cell	-0.0915346	1	0.77	0.93	0
208900	Ataxia-telangiectasia	promyelocyte	0.172176	1	0.306	0.874286	0
208900	Ataxia-telangiectasia	neutrophilic myeloblast	-0.820039	1	0.987	0.987	0
208900	Ataxia-telangiectasia	neutrophilic metamyelocyte	-0.71212	1	0.821	0.93	0
208900	Ataxia-telangiectasia	band form neutrophil	-1.05243	1	0.837	0.93	0
208900	Ataxia-telangiectasia	segmented neutrophil of bone marrow	-1.13907	1	0.835	0.93	0
209300	Atransferrinemia	proerythroblast	-0.798542	1	0.867	0.965	0
209300	Atransferrinemia	reticulocyte	-0.478144	1	0.414	0.965	0
209300	Atransferrinemia	erythroblast	-0.775419	1	0.594	0.965	0
209300	Atransferrinemia	plasma cell	1.21883	1	0.091	0.455	0
209300	Atransferrinemia	early pro-B cell	-0.26755	1	0.784	0.965	0
209300	Atransferrinemia	precursor B cell	-0.686507	1	0.951	0.965	0
209300	Atransferrinemia	immature B cell	-0.824517	1	0.965	0.965	0
209300	Atransferrinemia	basophil	2.37868	1	0.025	0.25	0
209300	Atransferrinemia	myelocyte	-0.360102	1	0.773	0.965	0
209300	Atransferrinemia	hematopoietic stem cell	-0.133452	1	0.785	0.965	0
209300	Atransferrinemia	macrophage	0.0231505	1	0.334	0.965	0
209300	Atransferrinemia	T cell	-0.700488	1	0.915	0.965	0
209300	Atransferrinemia	mature B cell	-0.777743	1	0.956	0.965	0
209300	Atransferrinemia	monocyte	2.34157	1	0.016	0.25	0
209300	Atransferrinemia	conventional dendritic cell	1.23383	1	0.069	0.455	0
209300	Atransferrinemia	promyelocyte	-0.16614	1	0.733	0.965	0
209300	Atransferrinemia	neutrophilic myeloblast	0.246447	1	0.278	0.965	0
209300	Atransferrinemia	neutrophilic metamyelocyte	-0.683941	1	0.78	0.965	0
209300	Atransferrinemia	band form neutrophil	-0.551565	1	0.594	0.965	0
209300	Atransferrinemia	segmented neutrophil of bone marrow	-0.238405	1	0.47	0.965	0
209920	Bare Lymphocyte Syndrome, Type Ii	proerythroblast	-0.503377	3	0.817	0.987	0
209920	Bare Lymphocyte Syndrome, Type Ii	reticulocyte	-1.11971	3	0.707	0.987	0
209920	Bare Lymphocyte Syndrome, Type Ii	erythroblast	-0.380928	3	0.415	0.987	0
209920	Bare Lymphocyte Syndrome, Type Ii	plasma cell	-0.203528	3	0.7	0.987	0
209920	Bare Lymphocyte Syndrome, Type Ii	early pro-B cell	1.30377	3	0.08	0.4	0
209920	Bare Lymphocyte Syndrome, Type Ii	precursor B cell	0.229063	3	0.278	0.794286	0
209920	Bare Lymphocyte Syndrome, Type Ii	immature B cell	1.57617	3	0.039	0.4	0
209920	Bare Lymphocyte Syndrome, Type Ii	basophil	-0.550339	3	0.966	0.987	0
209920	Bare Lymphocyte Syndrome, Type Ii	myelocyte	-0.673102	3	0.987	0.987	0
209920	Bare Lymphocyte Syndrome, Type Ii	hematopoietic stem cell	-0.0902702	3	0.872	0.987	0
209920	Bare Lymphocyte Syndrome, Type Ii	macrophage	0.72936	3	0.079	0.4	0
209920	Bare Lymphocyte Syndrome, Type Ii	T cell	-0.279236	3	0.75	0.987	0
209920	Bare Lymphocyte Syndrome, Type Ii	mature B cell	0.174636	3	0.108	0.432	0
209920	Bare Lymphocyte Syndrome, Type Ii	monocyte	0.0387536	3	0.177	0.59	0
209920	Bare Lymphocyte Syndrome, Type Ii	conventional dendritic cell	0.818242	3	0.046	0.4	0
209920	Bare Lymphocyte Syndrome, Type Ii	promyelocyte	-0.51673	3	0.987	0.987	0
209920	Bare Lymphocyte Syndrome, Type Ii	neutrophilic myeloblast	-0.14002	3	0.813	0.987	0
209920	Bare Lymphocyte Syndrome, Type Ii	neutrophilic metamyelocyte	-0.718266	3	0.894	0.987	0
209920	Bare Lymphocyte Syndrome, Type Ii	band form neutrophil	-0.925644	3	0.877	0.987	0
209920	Bare Lymphocyte Syndrome, Type Ii	segmented neutrophil of bone marrow	-0.550339	3	0.633	0.987	0
PS300755	Immunodeficiency (Select Examples)	proerythroblast	-0.484717	41	0.994	0.999	0
PS300755	Immunodeficiency (Select Examples)	reticulocyte	-0.833783	41	0.715	0.999	0
PS300755	Immunodeficiency (Select Examples)	erythroblast	-0.734845	41	0.828	0.999	0
PS300755	Immunodeficiency (Select Examples)	plasma cell	-0.250597	41	0.983	0.999	0
PS300755	Immunodeficiency (Select Examples)	early pro-B cell	-0.103898	41	0.999	0.999	0
PS300755	Immunodeficiency (Select Examples)	precursor B cell	-0.209314	41	0.999	0.999	0
PS300755	Immunodeficiency (Select Examples)	immature B cell	-0.218789	41	0.999	0.999	0
PS300755	Immunodeficiency (Select Examples)	basophil	-0.231791	41	0.994	0.999	0
PS300755	Immunodeficiency (Select Examples)	myelocyte	-0.246067	41	0.994	0.999	0
PS300755	Immunodeficiency (Select Examples)	hematopoietic stem cell	-0.230201	41	0.999	0.999	0
PS300755	Immunodeficiency (Select Examples)	macrophage	-0.151832	41	0.999	0.999	0
PS300755	Immunodeficiency (Select Examples)	T cell	0.482166	41	0	0	0
PS300755	Immunodeficiency (Select Examples)	mature B cell	-0.0535289	41	0.906	0.999	0
PS300755	Immunodeficiency (Select Examples)	monocyte	-0.234879	41	0.997	0.999	0
PS300755	Immunodeficiency (Select Examples)	conventional dendritic cell	0.135367	41	0.05	0.5	0
PS300755	Immunodeficiency (Select Examples)	promyelocyte	-0.0983591	41	0.996	0.999	0
PS300755	Immunodeficiency (Select Examples)	neutrophilic myeloblast	-0.237915	41	0.999	0.999	0
PS300755	Immunodeficiency (Select Examples)	neutrophilic metamyelocyte	-0.306029	41	0.714	0.999	0
PS300755	Immunodeficiency (Select Examples)	band form neutrophil	-0.328842	41	0.423	0.999	0
PS300755	Immunodeficiency (Select Examples)	segmented neutrophil of bone marrow	-0.248626	41	0.336	0.999	0
210370	Bietti Crystalline Corneoretinal Dystrophy	proerythroblast	-0.737368	1	0.816	0.96	0
210370	Bietti Crystalline Corneoretinal Dystrophy	reticulocyte	-0.605616	1	0.485	0.96	0
210370	Bietti Crystalline Corneoretinal Dystrophy	erythroblast	-0.737368	1	0.562	0.96	0
210370	Bietti Crystalline Corneoretinal Dystrophy	plasma cell	0.950876	1	0.109	0.665714	0
210370	Bietti Crystalline Corneoretinal Dystrophy	early pro-B cell	-0.13715	1	0.755	0.96	0
210370	Bietti Crystalline Corneoretinal Dystrophy	precursor B cell	-0.737368	1	0.963	0.963	0
210370	Bietti Crystalline Corneoretinal Dystrophy	immature B cell	-0.737368	1	0.962	0.963	0
210370	Bietti Crystalline Corneoretinal Dystrophy	basophil	-0.737368	1	0.941	0.963	0
210370	Bietti Crystalline Corneoretinal Dystrophy	myelocyte	0.321646	1	0.21	0.665714	0
210370	Bietti Crystalline Corneoretinal Dystrophy	hematopoietic stem cell	0.508819	1	0.233	0.665714	0
210370	Bietti Crystalline Corneoretinal Dystrophy	macrophage	-0.216809	1	0.78	0.96	0
210370	Bietti Crystalline Corneoretinal Dystrophy	T cell	0.380281	1	0.14	0.665714	0
210370	Bietti Crystalline Corneoretinal Dystrophy	mature B cell	-0.279176	1	0.686	0.96	0
210370	Bietti Crystalline Corneoretinal Dystrophy	monocyte	3.48624	1	0.005	0.1	1
210370	Bietti Crystalline Corneoretinal Dystrophy	conventional dendritic cell	0.72854	1	0.17	0.665714	0
210370	Bietti Crystalline Corneoretinal Dystrophy	promyelocyte	0.0490591	1	0.32	0.8	0
210370	Bietti Crystalline Corneoretinal Dystrophy	neutrophilic myeloblast	0.534164	1	0.194	0.665714	0
210370	Bietti Crystalline Corneoretinal Dystrophy	neutrophilic metamyelocyte	-0.609204	1	0.748	0.96	0
210370	Bietti Crystalline Corneoretinal Dystrophy	band form neutrophil	-0.687455	1	0.641	0.96	0
210370	Bietti Crystalline Corneoretinal Dystrophy	segmented neutrophil of bone marrow	-0.737368	1	0.662	0.96	0
PS210900	Microcephaly, growth restriction and increased sister chromatid exchange	proerythroblast	3.10081	1	0.016	0.32	0
PS210900	Microcephaly, growth restriction and increased sister chromatid exchange	reticulocyte	-0.789079	1	0.516	0.896667	0
PS210900	Microcephaly, growth restriction and increased sister chromatid exchange	erythroblast	-0.656906	1	0.538	0.896667	0
PS210900	Microcephaly, growth restriction and increased sister chromatid exchange	plasma cell	-0.802734	1	0.895	0.976	0
PS210900	Microcephaly, growth restriction and increased sister chromatid exchange	early pro-B cell	-0.878731	1	0.974	0.976	0
PS210900	Microcephaly, growth restriction and increased sister chromatid exchange	precursor B cell	0.736048	1	0.208	0.63	0
PS210900	Microcephaly, growth restriction and increased sister chromatid exchange	immature B cell	1.21507	1	0.174	0.63	0
PS210900	Microcephaly, growth restriction and increased sister chromatid exchange	basophil	0.860661	1	0.113	0.63	0
PS210900	Microcephaly, growth restriction and increased sister chromatid exchange	myelocyte	0.140189	1	0.251	0.63	0
PS210900	Microcephaly, growth restriction and increased sister chromatid exchange	hematopoietic stem cell	0.588927	1	0.244	0.63	0
PS210900	Microcephaly, growth restriction and increased sister chromatid exchange	macrophage	-0.720196	1	0.976	0.976	0
PS210900	Microcephaly, growth restriction and increased sister chromatid exchange	T cell	-0.518052	1	0.838	0.976	0
PS210900	Microcephaly, growth restriction and increased sister chromatid exchange	mature B cell	-0.756767	1	0.946	0.976	0
PS210900	Microcephaly, growth restriction and increased sister chromatid exchange	monocyte	-0.722765	1	0.957	0.976	0
PS210900	Microcephaly, growth restriction and increased sister chromatid exchange	conventional dendritic cell	0.663931	1	0.188	0.63	0
PS210900	Microcephaly, growth restriction and increased sister chromatid exchange	promyelocyte	0.0620392	1	0.342	0.76	0
PS210900	Microcephaly, growth restriction and increased sister chromatid exchange	neutrophilic myeloblast	0.236559	1	0.252	0.63	0
PS210900	Microcephaly, growth restriction and increased sister chromatid exchange	neutrophilic metamyelocyte	-0.0878969	1	0.451	0.896667	0
PS210900	Microcephaly, growth restriction and increased sister chromatid exchange	band form neutrophil	-0.868163	1	0.743	0.976	0
PS210900	Microcephaly, growth restriction and increased sister chromatid exchange	segmented neutrophil of bone marrow	-0.802937	1	0.69	0.976	0
PS114580	Familial candidiasis	proerythroblast	-0.88523	2	0.969	0.996	0
PS114580	Familial candidiasis	reticulocyte	-0.941076	2	0.683	0.996	0
PS114580	Familial candidiasis	erythroblast	-0.916672	2	0.754	0.996	0
PS114580	Familial candidiasis	plasma cell	-0.189489	2	0.612	0.996	0
PS114580	Familial candidiasis	early pro-B cell	0.903601	2	0.22	0.532	0
PS114580	Familial candidiasis	precursor B cell	-0.786318	2	0.996	0.996	0
PS114580	Familial candidiasis	immature B cell	-0.901271	2	0.996	0.996	0
PS114580	Familial candidiasis	basophil	-0.698373	2	0.987	0.996	0
PS114580	Familial candidiasis	myelocyte	0.548028	2	0.116	0.41	0
PS114580	Familial candidiasis	hematopoietic stem cell	-0.352546	2	0.953	0.996	0
PS114580	Familial candidiasis	macrophage	0.908931	2	0.095	0.41	0
PS114580	Familial candidiasis	T cell	-0.100548	2	0.51	0.927273	0
PS114580	Familial candidiasis	mature B cell	-0.300827	2	0.778	0.996	0
PS114580	Familial candidiasis	monocyte	1.53531	2	0.017	0.34	0
PS114580	Familial candidiasis	conventional dendritic cell	0.397288	2	0.266	0.532	0
PS114580	Familial candidiasis	promyelocyte	0.478011	2	0.168	0.48	0
PS114580	Familial candidiasis	neutrophilic myeloblast	0.746285	2	0.094	0.41	0
PS114580	Familial candidiasis	neutrophilic metamyelocyte	0.178731	2	0.078	0.41	0
PS114580	Familial candidiasis	band form neutrophil	-0.0193676	2	0.248	0.532	0
PS114580	Familial candidiasis	segmented neutrophil of bone marrow	0.395537	2	0.123	0.41	0
PS212065	Congenital disorders of glycosylation, type I	proerythroblast	-0.0480587	4	0.459	0.965	0
PS212065	Congenital disorders of glycosylation, type I	reticulocyte	-1.18542	4	0.843	0.965	0
PS212065	Congenital disorders of glycosylation, type I	erythroblast	-1.1526	4	0.901	0.965	0
PS212065	Congenital disorders of glycosylation, type I	plasma cell	0.959959	4	0.022	0.18	0
PS212065	Congenital disorders of glycosylation, type I	early pro-B cell	-0.344688	4	0.96	0.965	0
PS212065	Congenital disorders of glycosylation, type I	precursor B cell	-0.0933027	4	0.791	0.965	0
PS212065	Congenital disorders of glycosylation, type I	immature B cell	-0.131141	4	0.803	0.965	0
PS212065	Congenital disorders of glycosylation, type I	basophil	0.302298	4	0.089	0.356	0
PS212065	Congenital disorders of glycosylation, type I	myelocyte	0.541056	4	0.035	0.18	0
PS212065	Congenital disorders of glycosylation, type I	hematopoietic stem cell	-0.14425	4	0.917	0.965	0
PS212065	Congenital disorders of glycosylation, type I	macrophage	0.35863	4	0.156	0.52	0
PS212065	Congenital disorders of glycosylation, type I	T cell	-0.454106	4	0.936	0.965	0
PS212065	Congenital disorders of glycosylation, type I	mature B cell	-0.265816	4	0.841	0.965	0
PS212065	Congenital disorders of glycosylation, type I	monocyte	-0.43388	4	0.965	0.965	0
PS212065	Congenital disorders of glycosylation, type I	conventional dendritic cell	0.287237	4	0.242	0.691429	0
PS212065	Congenital disorders of glycosylation, type I	promyelocyte	0.604814	4	0.036	0.18	0
PS212065	Congenital disorders of glycosylation, type I	neutrophilic myeloblast	1.00374	4	0.005	0.1	1
PS212065	Congenital disorders of glycosylation, type I	neutrophilic metamyelocyte	-0.325149	4	0.603	0.965	0
PS212065	Congenital disorders of glycosylation, type I	band form neutrophil	-0.962469	4	0.943	0.965	0
PS212065	Congenital disorders of glycosylation, type I	segmented neutrophil of bone marrow	-0.947614	4	0.905	0.965	0
PS603041	Mitochondrial DNA depletion syndrome	proerythroblast	-0.152858	3	0.618	0.993	0
PS603041	Mitochondrial DNA depletion syndrome	reticulocyte	-1.03649	3	0.713	0.993	0
PS603041	Mitochondrial DNA depletion syndrome	erythroblast	-0.710259	3	0.59	0.993	0
PS603041	Mitochondrial DNA depletion syndrome	plasma cell	-0.568786	3	0.895	0.993	0
PS603041	Mitochondrial DNA depletion syndrome	early pro-B cell	0.591611	3	0.188	0.508889	0
PS603041	Mitochondrial DNA depletion syndrome	precursor B cell	0.87911	3	0.082	0.344	0
PS603041	Mitochondrial DNA depletion syndrome	immature B cell	2.17086	3	0.019	0.344	0
PS603041	Mitochondrial DNA depletion syndrome	basophil	0.566303	3	0.06	0.344	0
PS603041	Mitochondrial DNA depletion syndrome	myelocyte	0.479195	3	0.062	0.344	0
PS603041	Mitochondrial DNA depletion syndrome	hematopoietic stem cell	0.821408	3	0.086	0.344	0
PS603041	Mitochondrial DNA depletion syndrome	macrophage	-0.649986	3	0.993	0.993	0
PS603041	Mitochondrial DNA depletion syndrome	T cell	-0.246112	3	0.718	0.993	0
PS603041	Mitochondrial DNA depletion syndrome	mature B cell	-0.702212	3	0.99	0.993	0
PS603041	Mitochondrial DNA depletion syndrome	monocyte	-0.35368	3	0.862	0.993	0
PS603041	Mitochondrial DNA depletion syndrome	conventional dendritic cell	0.408426	3	0.146	0.486667	0
PS603041	Mitochondrial DNA depletion syndrome	promyelocyte	0.109712	3	0.229	0.508889	0
PS603041	Mitochondrial DNA depletion syndrome	neutrophilic myeloblast	0.178685	3	0.212	0.508889	0
PS603041	Mitochondrial DNA depletion syndrome	neutrophilic metamyelocyte	-0.705978	3	0.878	0.993	0
PS603041	Mitochondrial DNA depletion syndrome	band form neutrophil	-1.07671	3	0.949	0.993	0
PS603041	Mitochondrial DNA depletion syndrome	segmented neutrophil of bone marrow	-1.1397	3	0.927	0.993	0
214500	Chediak-higashi Syndrome	proerythroblast	-1.13483	1	0.961	0.992	0
214500	Chediak-higashi Syndrome	reticulocyte	-1.11435	1	0.642	0.992	0
214500	Chediak-higashi Syndrome	erythroblast	-1.07998	1	0.71	0.992	0
214500	Chediak-higashi Syndrome	plasma cell	-0.828418	1	0.896	0.992	0
214500	Chediak-higashi Syndrome	early pro-B cell	-0.903486	1	0.975	0.992	0
214500	Chediak-higashi Syndrome	precursor B cell	-0.937302	1	0.992	0.992	0
214500	Chediak-higashi Syndrome	immature B cell	-0.939336	1	0.983	0.992	0
214500	Chediak-higashi Syndrome	basophil	1.09008	1	0.075	0.286667	0
214500	Chediak-higashi Syndrome	myelocyte	-0.192348	1	0.703	0.992	0
214500	Chediak-higashi Syndrome	hematopoietic stem cell	-0.597556	1	0.964	0.992	0
214500	Chediak-higashi Syndrome	macrophage	-0.183113	1	0.773	0.992	0
214500	Chediak-higashi Syndrome	T cell	0.894475	1	0.084	0.286667	0
214500	Chediak-higashi Syndrome	mature B cell	-0.321094	1	0.752	0.992	0
214500	Chediak-higashi Syndrome	monocyte	1.15348	1	0.086	0.286667	0
214500	Chediak-higashi Syndrome	conventional dendritic cell	-0.17669	1	0.831	0.992	0
214500	Chediak-higashi Syndrome	promyelocyte	0.69405	1	0.129	0.3225	0
214500	Chediak-higashi Syndrome	neutrophilic myeloblast	0.938918	1	0.103	0.294286	0
214500	Chediak-higashi Syndrome	neutrophilic metamyelocyte	0.312966	1	0.081	0.286667	0
214500	Chediak-higashi Syndrome	band form neutrophil	0.896655	1	0.028	0.28	0
214500	Chediak-higashi Syndrome	segmented neutrophil of bone marrow	2.42788	1	0.019	0.28	0
214800	Charge Syndrome	proerythroblast	-1.01035	1	0.912	0.996	0
214800	Charge Syndrome	reticulocyte	-1.05122	1	0.612	0.996	0
214800	Charge Syndrome	erythroblast	-0.810962	1	0.615	0.996	0
214800	Charge Syndrome	plasma cell	0.739383	1	0.144	0.36	0
214800	Charge Syndrome	early pro-B cell	-0.389202	1	0.846	0.996	0
214800	Charge Syndrome	precursor B cell	-0.999231	1	0.992	0.996	0
214800	Charge Syndrome	immature B cell	-1.01566	1	0.993	0.996	0
214800	Charge Syndrome	basophil	-0.53175	1	0.863	0.996	0
214800	Charge Syndrome	myelocyte	0.920738	1	0.08	0.266667	0
214800	Charge Syndrome	hematopoietic stem cell	-0.990956	1	0.996	0.996	0
214800	Charge Syndrome	macrophage	1.0742	1	0.13	0.36	0
214800	Charge Syndrome	T cell	2.27344	1	0.014	0.266667	0
214800	Charge Syndrome	mature B cell	1.28986	1	0.045	0.266667	0
214800	Charge Syndrome	monocyte	-0.167425	1	0.661	0.996	0
214800	Charge Syndrome	conventional dendritic cell	-0.429207	1	0.954	0.996	0
214800	Charge Syndrome	promyelocyte	-0.501264	1	0.933	0.996	0
214800	Charge Syndrome	neutrophilic myeloblast	-0.776388	1	0.977	0.996	0
214800	Charge Syndrome	neutrophilic metamyelocyte	0.386179	1	0.072	0.266667	0
214800	Charge Syndrome	band form neutrophil	0.683074	1	0.068	0.266667	0
214800	Charge Syndrome	segmented neutrophil of bone marrow	1.30674	1	0.05	0.266667	0
PS607765	Bile acid synthesis defect, congenital	proerythroblast	-0.522617	2	0.81	0.988	0
PS607765	Bile acid synthesis defect, congenital	reticulocyte	-0.959439	2	0.692	0.988	0
PS607765	Bile acid synthesis defect, congenital	erythroblast	-0.930822	2	0.743	0.988	0
PS607765	Bile acid synthesis defect, congenital	plasma cell	0.042071	2	0.334	0.742222	0
PS607765	Bile acid synthesis defect, congenital	early pro-B cell	0.561742	2	0.294	0.742222	0
PS607765	Bile acid synthesis defect, congenital	precursor B cell	-0.341605	2	0.908	0.988	0
PS607765	Bile acid synthesis defect, congenital	immature B cell	-0.53199	2	0.963	0.988	0
PS607765	Bile acid synthesis defect, congenital	basophil	2.50533	2	0.003	0.06	1
PS607765	Bile acid synthesis defect, congenital	myelocyte	0.763483	2	0.071	0.395	0
PS607765	Bile acid synthesis defect, congenital	hematopoietic stem cell	1.01691	2	0.051	0.395	0
PS607765	Bile acid synthesis defect, congenital	macrophage	-0.275812	2	0.862	0.988	0
PS607765	Bile acid synthesis defect, congenital	T cell	-0.765987	2	0.988	0.988	0
PS607765	Bile acid synthesis defect, congenital	mature B cell	-0.297508	2	0.782	0.988	0
PS607765	Bile acid synthesis defect, congenital	monocyte	0.131795	2	0.319	0.742222	0
PS607765	Bile acid synthesis defect, congenital	conventional dendritic cell	-0.0678661	2	0.781	0.988	0
PS607765	Bile acid synthesis defect, congenital	promyelocyte	0.635247	2	0.079	0.395	0
PS607765	Bile acid synthesis defect, congenital	neutrophilic myeloblast	0.668984	2	0.13	0.433333	0
PS607765	Bile acid synthesis defect, congenital	neutrophilic metamyelocyte	0.0598711	2	0.129	0.433333	0
PS607765	Bile acid synthesis defect, congenital	band form neutrophil	-0.714395	2	0.777	0.988	0
PS607765	Bile acid synthesis defect, congenital	segmented neutrophil of bone marrow	-0.977393	2	0.869	0.988	0
216340	Cleidocranial Dysplasia With Micrognathia, Absent Thumbs, And Distal	proerythroblast	0.713373	1	0.129	0.645	0
216340	Cleidocranial Dysplasia With Micrognathia, Absent Thumbs, And Distal	reticulocyte	0.363979	1	0.019	0.19	0
216340	Cleidocranial Dysplasia With Micrognathia, Absent Thumbs, And Distal	erythroblast	3.31523	1	0.006	0.12	0
216340	Cleidocranial Dysplasia With Micrognathia, Absent Thumbs, And Distal	plasma cell	0.542451	1	0.184	0.736	0
216340	Cleidocranial Dysplasia With Micrognathia, Absent Thumbs, And Distal	early pro-B cell	-0.161472	1	0.801	0.959	0
216340	Cleidocranial Dysplasia With Micrognathia, Absent Thumbs, And Distal	precursor B cell	0.0416131	1	0.354	0.885	0
216340	Cleidocranial Dysplasia With Micrognathia, Absent Thumbs, And Distal	immature B cell	0.788569	1	0.262	0.748571	0
216340	Cleidocranial Dysplasia With Micrognathia, Absent Thumbs, And Distal	basophil	-0.402851	1	0.816	0.959	0
216340	Cleidocranial Dysplasia With Micrognathia, Absent Thumbs, And Distal	myelocyte	-0.319072	1	0.776	0.959	0
216340	Cleidocranial Dysplasia With Micrognathia, Absent Thumbs, And Distal	hematopoietic stem cell	-0.158378	1	0.798	0.959	0
216340	Cleidocranial Dysplasia With Micrognathia, Absent Thumbs, And Distal	macrophage	0.316162	1	0.255	0.748571	0
216340	Cleidocranial Dysplasia With Micrognathia, Absent Thumbs, And Distal	T cell	-0.767043	1	0.936	0.959	0
216340	Cleidocranial Dysplasia With Micrognathia, Absent Thumbs, And Distal	mature B cell	-0.644287	1	0.906	0.959	0
216340	Cleidocranial Dysplasia With Micrognathia, Absent Thumbs, And Distal	monocyte	-0.445005	1	0.829	0.959	0
216340	Cleidocranial Dysplasia With Micrognathia, Absent Thumbs, And Distal	conventional dendritic cell	-0.322157	1	0.881	0.959	0
216340	Cleidocranial Dysplasia With Micrognathia, Absent Thumbs, And Distal	promyelocyte	-0.567648	1	0.959	0.959	0
216340	Cleidocranial Dysplasia With Micrognathia, Absent Thumbs, And Distal	neutrophilic myeloblast	0.911733	1	0.121	0.645	0
216340	Cleidocranial Dysplasia With Micrognathia, Absent Thumbs, And Distal	neutrophilic metamyelocyte	-0.930782	1	0.915	0.959	0
216340	Cleidocranial Dysplasia With Micrognathia, Absent Thumbs, And Distal	band form neutrophil	-0.888965	1	0.75	0.959	0
216340	Cleidocranial Dysplasia With Micrognathia, Absent Thumbs, And Distal	segmented neutrophil of bone marrow	-1.38545	1	0.915	0.959	0
216550	Cohen Syndrome	proerythroblast	0.2206	1	0.202	0.528889	0
216550	Cohen Syndrome	reticulocyte	-2.01949	1	0.97	0.998	0
216550	Cohen Syndrome	erythroblast	0.0691281	1	0.081	0.396	0
216550	Cohen Syndrome	plasma cell	-1.6959	1	0.998	0.998	0
216550	Cohen Syndrome	early pro-B cell	0.222089	1	0.34	0.650909	0
216550	Cohen Syndrome	precursor B cell	0.000124463	1	0.395	0.658333	0
216550	Cohen Syndrome	immature B cell	2.19185	1	0.064	0.396	0
216550	Cohen Syndrome	basophil	-0.246607	1	0.704	0.938667	0
216550	Cohen Syndrome	myelocyte	-0.785463	1	0.953	0.998	0
216550	Cohen Syndrome	hematopoietic stem cell	0.134867	1	0.358	0.650909	0
216550	Cohen Syndrome	macrophage	0.463706	1	0.238	0.528889	0
216550	Cohen Syndrome	T cell	-0.983673	1	0.977	0.998	0
216550	Cohen Syndrome	mature B cell	0.527369	1	0.123	0.41	0
216550	Cohen Syndrome	monocyte	0.262646	1	0.228	0.528889	0
216550	Cohen Syndrome	conventional dendritic cell	1.22365	1	0.062	0.396	0
216550	Cohen Syndrome	promyelocyte	-0.278771	1	0.81	0.998	0
216550	Cohen Syndrome	neutrophilic myeloblast	1.66738	1	0.027	0.396	0
216550	Cohen Syndrome	neutrophilic metamyelocyte	0.0131642	1	0.099	0.396	0
216550	Cohen Syndrome	band form neutrophil	-0.305205	1	0.465	0.715385	0
216550	Cohen Syndrome	segmented neutrophil of bone marrow	-0.681464	1	0.63	0.9	0
PS222470	Trichohepatoenteric syndrome	proerythroblast	-0.859652	1	0.859	0.935	0
PS222470	Trichohepatoenteric syndrome	reticulocyte	-1.2532	1	0.736	0.935	0
PS222470	Trichohepatoenteric syndrome	erythroblast	-1.2532	1	0.782	0.935	0
PS222470	Trichohepatoenteric syndrome	plasma cell	1.14505	1	0.088	0.511429	0
PS222470	Trichohepatoenteric syndrome	early pro-B cell	1.17786	1	0.179	0.511429	0
PS222470	Trichohepatoenteric syndrome	precursor B cell	-0.279847	1	0.802	0.935	0
PS222470	Trichohepatoenteric syndrome	immature B cell	-0.205256	1	0.759	0.935	0
PS222470	Trichohepatoenteric syndrome	basophil	0.470891	1	0.17	0.511429	0
PS222470	Trichohepatoenteric syndrome	myelocyte	0.784076	1	0.112	0.511429	0
PS222470	Trichohepatoenteric syndrome	hematopoietic stem cell	2.33353	1	0.015	0.3	0
PS222470	Trichohepatoenteric syndrome	macrophage	0.46237	1	0.227	0.542222	0
PS222470	Trichohepatoenteric syndrome	T cell	0.0313763	1	0.244	0.542222	0
PS222470	Trichohepatoenteric syndrome	mature B cell	0.937152	1	0.071	0.511429	0
PS222470	Trichohepatoenteric syndrome	monocyte	-0.650177	1	0.926	0.935	0
PS222470	Trichohepatoenteric syndrome	conventional dendritic cell	0.577749	1	0.167	0.511429	0
PS222470	Trichohepatoenteric syndrome	promyelocyte	0.275283	1	0.283	0.566	0
PS222470	Trichohepatoenteric syndrome	neutrophilic myeloblast	-0.22897	1	0.758	0.935	0
PS222470	Trichohepatoenteric syndrome	neutrophilic metamyelocyte	-0.994689	1	0.935	0.935	0
PS222470	Trichohepatoenteric syndrome	band form neutrophil	-1.21714	1	0.932	0.935	0
PS222470	Trichohepatoenteric syndrome	segmented neutrophil of bone marrow	-1.2532	1	0.856	0.935	0
222700	Lysinuric Protein Intolerance	proerythroblast	-0.42575	1	0.706	0.956	0
222700	Lysinuric Protein Intolerance	reticulocyte	-0.709697	1	0.507	0.956	0
222700	Lysinuric Protein Intolerance	erythroblast	-0.709697	1	0.598	0.956	0
222700	Lysinuric Protein Intolerance	plasma cell	0.947552	1	0.129	0.86	0
222700	Lysinuric Protein Intolerance	early pro-B cell	3.70414	1	0.012	0.24	0
222700	Lysinuric Protein Intolerance	precursor B cell	-0.0284396	1	0.729	0.956	0
222700	Lysinuric Protein Intolerance	immature B cell	-0.224004	1	0.738	0.956	0
222700	Lysinuric Protein Intolerance	basophil	-0.709697	1	0.932	0.956	0
222700	Lysinuric Protein Intolerance	myelocyte	-0.510258	1	0.866	0.956	0
222700	Lysinuric Protein Intolerance	hematopoietic stem cell	-0.507379	1	0.956	0.956	0
222700	Lysinuric Protein Intolerance	macrophage	-0.350472	1	0.84	0.956	0
222700	Lysinuric Protein Intolerance	T cell	-0.606814	1	0.877	0.956	0
222700	Lysinuric Protein Intolerance	mature B cell	-0.00389649	1	0.599	0.956	0
222700	Lysinuric Protein Intolerance	monocyte	0.767037	1	0.112	0.86	0
222700	Lysinuric Protein Intolerance	conventional dendritic cell	-0.163817	1	0.815	0.956	0
222700	Lysinuric Protein Intolerance	promyelocyte	0.491391	1	0.175	0.875	0
222700	Lysinuric Protein Intolerance	neutrophilic myeloblast	0.345003	1	0.235	0.94	0
222700	Lysinuric Protein Intolerance	neutrophilic metamyelocyte	-0.466731	1	0.681	0.956	0
222700	Lysinuric Protein Intolerance	band form neutrophil	-0.213838	1	0.413	0.956	0
222700	Lysinuric Protein Intolerance	segmented neutrophil of bone marrow	-0.624628	1	0.603	0.956	0
222800	Diphosphoglycerate Mutase Deficiency Of Erythrocyte	proerythroblast	-0.207313	1	0.624	0.899	0
222800	Diphosphoglycerate Mutase Deficiency Of Erythrocyte	reticulocyte	3.78172	1	0	0	1
222800	Diphosphoglycerate Mutase Deficiency Of Erythrocyte	erythroblast	1.72927	1	0.039	0.39	0
222800	Diphosphoglycerate Mutase Deficiency Of Erythrocyte	plasma cell	-0.304678	1	0.661	0.899	0
222800	Diphosphoglycerate Mutase Deficiency Of Erythrocyte	early pro-B cell	-0.3189	1	0.815	0.899	0
222800	Diphosphoglycerate Mutase Deficiency Of Erythrocyte	precursor B cell	-0.309424	1	0.8	0.899	0
222800	Diphosphoglycerate Mutase Deficiency Of Erythrocyte	immature B cell	-0.328373	1	0.825	0.899	0
222800	Diphosphoglycerate Mutase Deficiency Of Erythrocyte	basophil	-0.270093	1	0.721	0.899	0
222800	Diphosphoglycerate Mutase Deficiency Of Erythrocyte	myelocyte	-0.331267	1	0.77	0.899	0
222800	Diphosphoglycerate Mutase Deficiency Of Erythrocyte	hematopoietic stem cell	-0.291577	1	0.872	0.899	0
222800	Diphosphoglycerate Mutase Deficiency Of Erythrocyte	macrophage	-0.294871	1	0.792	0.899	0
222800	Diphosphoglycerate Mutase Deficiency Of Erythrocyte	T cell	-0.2549	1	0.65	0.899	0
222800	Diphosphoglycerate Mutase Deficiency Of Erythrocyte	mature B cell	-0.279892	1	0.685	0.899	0
222800	Diphosphoglycerate Mutase Deficiency Of Erythrocyte	monocyte	-0.3166	1	0.758	0.899	0
222800	Diphosphoglycerate Mutase Deficiency Of Erythrocyte	conventional dendritic cell	-0.330721	1	0.899	0.899	0
222800	Diphosphoglycerate Mutase Deficiency Of Erythrocyte	promyelocyte	-0.324109	1	0.869	0.899	0
222800	Diphosphoglycerate Mutase Deficiency Of Erythrocyte	neutrophilic myeloblast	-0.331428	1	0.802	0.899	0
222800	Diphosphoglycerate Mutase Deficiency Of Erythrocyte	neutrophilic metamyelocyte	-0.338281	1	0.575	0.899	0
222800	Diphosphoglycerate Mutase Deficiency Of Erythrocyte	band form neutrophil	-0.334856	1	0.498	0.899	0
222800	Diphosphoglycerate Mutase Deficiency Of Erythrocyte	segmented neutrophil of bone marrow	-0.343704	1	0.492	0.899	0
PS224120	Anemia, congenital dyserythropoietic	proerythroblast	1.67476	3	0.008	0.16	0
PS224120	Anemia, congenital dyserythropoietic	reticulocyte	-1.15321	3	0.719	0.981	0
PS224120	Anemia, congenital dyserythropoietic	erythroblast	-0.688555	3	0.555	0.981	0
PS224120	Anemia, congenital dyserythropoietic	plasma cell	-0.301082	3	0.754	0.981	0
PS224120	Anemia, congenital dyserythropoietic	early pro-B cell	-0.301082	3	0.901	0.981	0
PS224120	Anemia, congenital dyserythropoietic	precursor B cell	0.846641	3	0.093	0.386667	0
PS224120	Anemia, congenital dyserythropoietic	immature B cell	1.60015	3	0.047	0.386667	0
PS224120	Anemia, congenital dyserythropoietic	basophil	0.277996	3	0.108	0.386667	0
PS224120	Anemia, congenital dyserythropoietic	myelocyte	-0.0955562	3	0.699	0.981	0
PS224120	Anemia, congenital dyserythropoietic	hematopoietic stem cell	-0.156515	3	0.893	0.981	0
PS224120	Anemia, congenital dyserythropoietic	macrophage	-0.297058	3	0.893	0.981	0
PS224120	Anemia, congenital dyserythropoietic	T cell	-0.301082	3	0.75	0.981	0
PS224120	Anemia, congenital dyserythropoietic	mature B cell	-0.279188	3	0.787	0.981	0
PS224120	Anemia, congenital dyserythropoietic	monocyte	-0.623375	3	0.981	0.981	0
PS224120	Anemia, congenital dyserythropoietic	conventional dendritic cell	0.634832	3	0.093	0.386667	0
PS224120	Anemia, congenital dyserythropoietic	promyelocyte	0.0403096	3	0.287	0.82	0
PS224120	Anemia, congenital dyserythropoietic	neutrophilic myeloblast	0.437151	3	0.116	0.386667	0
PS224120	Anemia, congenital dyserythropoietic	neutrophilic metamyelocyte	-0.289671	3	0.566	0.981	0
PS224120	Anemia, congenital dyserythropoietic	band form neutrophil	-1.06526	3	0.941	0.981	0
PS224120	Anemia, congenital dyserythropoietic	segmented neutrophil of bone marrow	-1.06244	3	0.871	0.981	0
PS127550	Dyskeratosis congenita	proerythroblast	0.0104209	6	0.132	0.377143	0
PS127550	Dyskeratosis congenita	reticulocyte	-1.18915	6	0.892	0.999	0
PS127550	Dyskeratosis congenita	erythroblast	-1.10554	6	0.894	0.999	0
PS127550	Dyskeratosis congenita	plasma cell	0.383725	6	0.047	0.235	0
PS127550	Dyskeratosis congenita	early pro-B cell	0.0306338	6	0.423	0.769091	0
PS127550	Dyskeratosis congenita	precursor B cell	1.40584	6	0.002	0.02	1
PS127550	Dyskeratosis congenita	immature B cell	0.338541	6	0.191	0.4775	0
PS127550	Dyskeratosis congenita	basophil	-0.0488677	6	0.626	0.999	0
PS127550	Dyskeratosis congenita	myelocyte	1.17158	6	0	0	1
PS127550	Dyskeratosis congenita	hematopoietic stem cell	1.06715	6	0.003	0.02	1
PS127550	Dyskeratosis congenita	macrophage	-0.0279068	6	0.755	0.999	0
PS127550	Dyskeratosis congenita	T cell	0.115443	6	0.069	0.276	0
PS127550	Dyskeratosis congenita	mature B cell	-0.200895	6	0.813	0.999	0
PS127550	Dyskeratosis congenita	monocyte	-0.432457	6	0.978	0.999	0
PS127550	Dyskeratosis congenita	conventional dendritic cell	0.15941	6	0.283	0.566	0
PS127550	Dyskeratosis congenita	promyelocyte	0.198789	6	0.129	0.377143	0
PS127550	Dyskeratosis congenita	neutrophilic myeloblast	0.0728284	6	0.263	0.566	0
PS127550	Dyskeratosis congenita	neutrophilic metamyelocyte	-0.68736	6	0.952	0.999	0
PS127550	Dyskeratosis congenita	band form neutrophil	-1.14758	6	0.999	0.999	0
PS127550	Dyskeratosis congenita	segmented neutrophil of bone marrow	-1.36253	6	0.996	0.999	0
PS225750	Aicardi-Goutieres syndrome	proerythroblast	1.34081	7	0.001	0.01	1
PS225750	Aicardi-Goutieres syndrome	reticulocyte	-0.951472	7	0.692	0.999	0
PS225750	Aicardi-Goutieres syndrome	erythroblast	-0.710475	7	0.625	0.999	0
PS225750	Aicardi-Goutieres syndrome	plasma cell	-0.104176	7	0.709	0.999	0
PS225750	Aicardi-Goutieres syndrome	early pro-B cell	-0.495312	7	0.993	0.999	0
PS225750	Aicardi-Goutieres syndrome	precursor B cell	-0.585364	7	0.999	0.999	0
PS225750	Aicardi-Goutieres syndrome	immature B cell	-0.530372	7	0.999	0.999	0
PS225750	Aicardi-Goutieres syndrome	basophil	-0.576194	7	0.996	0.999	0
PS225750	Aicardi-Goutieres syndrome	myelocyte	-0.255316	7	0.886	0.999	0
PS225750	Aicardi-Goutieres syndrome	hematopoietic stem cell	-0.0180105	7	0.92	0.999	0
PS225750	Aicardi-Goutieres syndrome	macrophage	0.0234766	7	0.226	0.753333	0
PS225750	Aicardi-Goutieres syndrome	T cell	-0.512013	7	0.971	0.999	0
PS225750	Aicardi-Goutieres syndrome	mature B cell	-0.411086	7	0.958	0.999	0
PS225750	Aicardi-Goutieres syndrome	monocyte	1.49479	7	0	0	1
PS225750	Aicardi-Goutieres syndrome	conventional dendritic cell	0.404518	7	0.083	0.332	0
PS225750	Aicardi-Goutieres syndrome	promyelocyte	0.471501	7	0.031	0.155	0
PS225750	Aicardi-Goutieres syndrome	neutrophilic myeloblast	0.598153	7	0.02	0.133333	0
PS225750	Aicardi-Goutieres syndrome	neutrophilic metamyelocyte	-0.695753	7	0.965	0.999	0
PS225750	Aicardi-Goutieres syndrome	band form neutrophil	-0.447436	7	0.607	0.999	0
PS225750	Aicardi-Goutieres syndrome	segmented neutrophil of bone marrow	-0.372073	7	0.524	0.999	0
226300	Complement Hyperactivation, Angiopathic Thrombosis, And Protein-losing Enteropathy	proerythroblast	0.265968	1	0.193	0.772	0
226300	Complement Hyperactivation, Angiopathic Thrombosis, And Protein-losing Enteropathy	reticulocyte	-0.387329	1	0.426	0.946667	0
226300	Complement Hyperactivation, Angiopathic Thrombosis, And Protein-losing Enteropathy	erythroblast	-0.295225	1	0.397	0.946667	0
226300	Complement Hyperactivation, Angiopathic Thrombosis, And Protein-losing Enteropathy	plasma cell	0.60193	1	0.158	0.772	0
226300	Complement Hyperactivation, Angiopathic Thrombosis, And Protein-losing Enteropathy	early pro-B cell	-0.289712	1	0.791	0.968	0
226300	Complement Hyperactivation, Angiopathic Thrombosis, And Protein-losing Enteropathy	precursor B cell	-0.32964	1	0.818	0.968	0
226300	Complement Hyperactivation, Angiopathic Thrombosis, And Protein-losing Enteropathy	immature B cell	0.00638443	1	0.386	0.946667	0
226300	Complement Hyperactivation, Angiopathic Thrombosis, And Protein-losing Enteropathy	basophil	-0.0156566	1	0.621	0.968	0
226300	Complement Hyperactivation, Angiopathic Thrombosis, And Protein-losing Enteropathy	myelocyte	-0.52364	1	0.873	0.968	0
226300	Complement Hyperactivation, Angiopathic Thrombosis, And Protein-losing Enteropathy	hematopoietic stem cell	-0.394668	1	0.933	0.968	0
226300	Complement Hyperactivation, Angiopathic Thrombosis, And Protein-losing Enteropathy	macrophage	-0.479343	1	0.881	0.968	0
226300	Complement Hyperactivation, Angiopathic Thrombosis, And Protein-losing Enteropathy	T cell	0.0437624	1	0.246	0.82	0
226300	Complement Hyperactivation, Angiopathic Thrombosis, And Protein-losing Enteropathy	mature B cell	4.01191	1	0.001	0.02	1
226300	Complement Hyperactivation, Angiopathic Thrombosis, And Protein-losing Enteropathy	monocyte	-0.471963	1	0.857	0.968	0
226300	Complement Hyperactivation, Angiopathic Thrombosis, And Protein-losing Enteropathy	conventional dendritic cell	-0.528983	1	0.968	0.968	0
226300	Complement Hyperactivation, Angiopathic Thrombosis, And Protein-losing Enteropathy	promyelocyte	-0.515424	1	0.933	0.968	0
226300	Complement Hyperactivation, Angiopathic Thrombosis, And Protein-losing Enteropathy	neutrophilic myeloblast	-0.537457	1	0.921	0.968	0
226300	Complement Hyperactivation, Angiopathic Thrombosis, And Protein-losing Enteropathy	neutrophilic metamyelocyte	-0.494226	1	0.673	0.968	0
226300	Complement Hyperactivation, Angiopathic Thrombosis, And Protein-losing Enteropathy	band form neutrophil	0.0596307	1	0.104	0.72	0
226300	Complement Hyperactivation, Angiopathic Thrombosis, And Protein-losing Enteropathy	segmented neutrophil of bone marrow	0.273682	1	0.108	0.72	0
226670	Epidermolysis Bullosa Simplex With Muscular Dystrophy	proerythroblast	-1.1769	1	0.958	0.993	0
226670	Epidermolysis Bullosa Simplex With Muscular Dystrophy	reticulocyte	-1.14066	1	0.641	0.993	0
226670	Epidermolysis Bullosa Simplex With Muscular Dystrophy	erythroblast	-1.06202	1	0.661	0.993	0
226670	Epidermolysis Bullosa Simplex With Muscular Dystrophy	plasma cell	-0.676503	1	0.861	0.993	0
226670	Epidermolysis Bullosa Simplex With Muscular Dystrophy	early pro-B cell	-0.334519	1	0.817	0.993	0
226670	Epidermolysis Bullosa Simplex With Muscular Dystrophy	precursor B cell	-0.971887	1	0.993	0.993	0
226670	Epidermolysis Bullosa Simplex With Muscular Dystrophy	immature B cell	-1.01835	1	0.986	0.993	0
226670	Epidermolysis Bullosa Simplex With Muscular Dystrophy	basophil	0.638707	1	0.125	0.416667	0
226670	Epidermolysis Bullosa Simplex With Muscular Dystrophy	myelocyte	-0.692865	1	0.944	0.993	0
226670	Epidermolysis Bullosa Simplex With Muscular Dystrophy	hematopoietic stem cell	0.641955	1	0.229	0.5725	0
226670	Epidermolysis Bullosa Simplex With Muscular Dystrophy	macrophage	0.272316	1	0.285	0.633333	0
226670	Epidermolysis Bullosa Simplex With Muscular Dystrophy	T cell	0.696961	1	0.102	0.408	0
226670	Epidermolysis Bullosa Simplex With Muscular Dystrophy	mature B cell	0.266761	1	0.203	0.5725	0
226670	Epidermolysis Bullosa Simplex With Muscular Dystrophy	monocyte	0.949775	1	0.087	0.408	0
226670	Epidermolysis Bullosa Simplex With Muscular Dystrophy	conventional dendritic cell	0.979171	1	0.099	0.408	0
226670	Epidermolysis Bullosa Simplex With Muscular Dystrophy	promyelocyte	1.89409	1	0.006	0.12	0
226670	Epidermolysis Bullosa Simplex With Muscular Dystrophy	neutrophilic myeloblast	2.1362	1	0.014	0.14	0
226670	Epidermolysis Bullosa Simplex With Muscular Dystrophy	neutrophilic metamyelocyte	-0.601002	1	0.755	0.993	0
226670	Epidermolysis Bullosa Simplex With Muscular Dystrophy	band form neutrophil	-0.331372	1	0.496	0.965455	0
226670	Epidermolysis Bullosa Simplex With Muscular Dystrophy	segmented neutrophil of bone marrow	-0.469854	1	0.531	0.965455	0
PS227650	Fanconi anemia	proerythroblast	0.9878	10	0	0	0
PS227650	Fanconi anemia	reticulocyte	-1.03768	10	0.8	0.999	0
PS227650	Fanconi anemia	erythroblast	-0.800366	10	0.745	0.999	0
PS227650	Fanconi anemia	plasma cell	-0.465402	10	0.971	0.999	0
PS227650	Fanconi anemia	early pro-B cell	-0.494668	10	0.999	0.999	0
PS227650	Fanconi anemia	precursor B cell	1.00427	10	0.003	0.015	1
PS227650	Fanconi anemia	immature B cell	1.54091	10	0.003	0.015	1
PS227650	Fanconi anemia	basophil	-0.155878	10	0.861	0.999	0
PS227650	Fanconi anemia	myelocyte	0.135948	10	0.042	0.122857	0
PS227650	Fanconi anemia	hematopoietic stem cell	0.310176	10	0.101	0.224444	0
PS227650	Fanconi anemia	macrophage	-0.60352	10	0.999	0.999	0
PS227650	Fanconi anemia	T cell	-0.672838	10	0.999	0.999	0
PS227650	Fanconi anemia	mature B cell	-0.623557	10	0.999	0.999	0
PS227650	Fanconi anemia	monocyte	-0.609549	10	0.999	0.999	0
PS227650	Fanconi anemia	conventional dendritic cell	0.355001	10	0.063	0.1575	0
PS227650	Fanconi anemia	promyelocyte	0.282197	10	0.043	0.122857	0
PS227650	Fanconi anemia	neutrophilic myeloblast	0.33929	10	0.041	0.122857	0
PS227650	Fanconi anemia	neutrophilic metamyelocyte	0.17364	10	0	0	0
PS227650	Fanconi anemia	band form neutrophil	-0.838344	10	0.949	0.999	0
PS227650	Fanconi anemia	segmented neutrophil of bone marrow	-0.919264	10	0.946	0.999	0
228000	Farber Lipogranulomatosis	proerythroblast	-0.870153	1	0.874	0.962	0
228000	Farber Lipogranulomatosis	reticulocyte	-0.774856	1	0.527	0.962	0
228000	Farber Lipogranulomatosis	erythroblast	-0.881573	1	0.651	0.962	0
228000	Farber Lipogranulomatosis	plasma cell	-0.183118	1	0.623	0.962	0
228000	Farber Lipogranulomatosis	early pro-B cell	-0.357855	1	0.844	0.962	0
228000	Farber Lipogranulomatosis	precursor B cell	-0.737523	1	0.962	0.962	0
228000	Farber Lipogranulomatosis	immature B cell	-0.754251	1	0.962	0.962	0
228000	Farber Lipogranulomatosis	basophil	-0.600985	1	0.908	0.962	0
228000	Farber Lipogranulomatosis	myelocyte	-0.263134	1	0.724	0.962	0
228000	Farber Lipogranulomatosis	hematopoietic stem cell	-0.208635	1	0.83	0.962	0
228000	Farber Lipogranulomatosis	macrophage	1.9855	1	0.046	0.244	0
228000	Farber Lipogranulomatosis	T cell	-0.638724	1	0.888	0.962	0
228000	Farber Lipogranulomatosis	mature B cell	-0.516531	1	0.848	0.962	0
228000	Farber Lipogranulomatosis	monocyte	2.26704	1	0.018	0.244	0
228000	Farber Lipogranulomatosis	conventional dendritic cell	1.39695	1	0.061	0.244	0
228000	Farber Lipogranulomatosis	promyelocyte	1.06938	1	0.056	0.244	0
228000	Farber Lipogranulomatosis	neutrophilic myeloblast	1.30687	1	0.058	0.244	0
228000	Farber Lipogranulomatosis	neutrophilic metamyelocyte	-0.53215	1	0.695	0.962	0
228000	Farber Lipogranulomatosis	band form neutrophil	-0.464795	1	0.56	0.962	0
228000	Farber Lipogranulomatosis	segmented neutrophil of bone marrow	-0.241444	1	0.463	0.962	0
230000	Fucosidosis	proerythroblast	-1.36463	1	0.98	0.98	0
230000	Fucosidosis	reticulocyte	-1.52459	1	0.847	0.98	0
230000	Fucosidosis	erythroblast	-1.71184	1	0.95	0.98	0
230000	Fucosidosis	plasma cell	0.806673	1	0.153	0.4325	0
230000	Fucosidosis	early pro-B cell	1.25759	1	0.167	0.4325	0
230000	Fucosidosis	precursor B cell	-0.676738	1	0.954	0.98	0
230000	Fucosidosis	immature B cell	-0.426272	1	0.861	0.98	0
230000	Fucosidosis	basophil	0.0761917	1	0.278	0.617778	0
230000	Fucosidosis	myelocyte	-0.388673	1	0.777	0.98	0
230000	Fucosidosis	hematopoietic stem cell	-0.219285	1	0.846	0.98	0
230000	Fucosidosis	macrophage	0.773916	1	0.173	0.4325	0
230000	Fucosidosis	T cell	-0.793735	1	0.943	0.98	0
230000	Fucosidosis	mature B cell	0.747177	1	0.11	0.4325	0
230000	Fucosidosis	monocyte	1.58107	1	0.05	0.4325	0
230000	Fucosidosis	conventional dendritic cell	0.918343	1	0.116	0.4325	0
230000	Fucosidosis	promyelocyte	1.2281	1	0.035	0.4325	0
230000	Fucosidosis	neutrophilic myeloblast	1.10891	1	0.105	0.4325	0
230000	Fucosidosis	neutrophilic metamyelocyte	-0.777324	1	0.809	0.98	0
230000	Fucosidosis	band form neutrophil	-0.576302	1	0.569	0.98	0
230000	Fucosidosis	segmented neutrophil of bone marrow	-0.0385751	1	0.435	0.87	0
PS230400	Galactosemia	proerythroblast	-1.34049	1	0.978	0.98	0
PS230400	Galactosemia	reticulocyte	-1.32184	1	0.729	0.95375	0
PS230400	Galactosemia	erythroblast	-1.54441	1	0.882	0.98	0
PS230400	Galactosemia	plasma cell	0.389603	1	0.169	0.4475	0
PS230400	Galactosemia	early pro-B cell	1.23349	1	0.15	0.4475	0
PS230400	Galactosemia	precursor B cell	1.311	1	0.12	0.4475	0
PS230400	Galactosemia	immature B cell	-0.0223359	1	0.712	0.95375	0
PS230400	Galactosemia	basophil	0.749846	1	0.126	0.4475	0
PS230400	Galactosemia	myelocyte	1.07112	1	0.075	0.4475	0
PS230400	Galactosemia	hematopoietic stem cell	1.77364	1	0.03	0.4475	0
PS230400	Galactosemia	macrophage	0.663636	1	0.179	0.4475	0
PS230400	Galactosemia	T cell	0.202366	1	0.176	0.4475	0
PS230400	Galactosemia	mature B cell	-0.232247	1	0.65	0.95375	0
PS230400	Galactosemia	monocyte	-0.203986	1	0.698	0.95375	0
PS230400	Galactosemia	conventional dendritic cell	0.44512	1	0.234	0.52	0
PS230400	Galactosemia	promyelocyte	0.0829773	1	0.319	0.62	0
PS230400	Galactosemia	neutrophilic myeloblast	0.104393	1	0.341	0.62	0
PS230400	Galactosemia	neutrophilic metamyelocyte	-0.705677	1	0.763	0.95375	0
PS230400	Galactosemia	band form neutrophil	-1.37425	1	0.98	0.98	0
PS230400	Galactosemia	segmented neutrophil of bone marrow	-1.28194	1	0.875	0.98	0
230450	Gamma-glutamylcysteine Synthetase Deficiency, Hemolytic Anemia Dueto	proerythroblast	2.53698	1	0.031	0.32	0
230450	Gamma-glutamylcysteine Synthetase Deficiency, Hemolytic Anemia Dueto	reticulocyte	-0.766203	1	0.526	0.927	0
230450	Gamma-glutamylcysteine Synthetase Deficiency, Hemolytic Anemia Dueto	erythroblast	0.224841	1	0.08	0.533333	0
230450	Gamma-glutamylcysteine Synthetase Deficiency, Hemolytic Anemia Dueto	plasma cell	-0.721206	1	0.88	0.927	0
230450	Gamma-glutamylcysteine Synthetase Deficiency, Hemolytic Anemia Dueto	early pro-B cell	0.833444	1	0.24	0.866667	0
230450	Gamma-glutamylcysteine Synthetase Deficiency, Hemolytic Anemia Dueto	precursor B cell	0.575409	1	0.26	0.866667	0
230450	Gamma-glutamylcysteine Synthetase Deficiency, Hemolytic Anemia Dueto	immature B cell	2.64508	1	0.032	0.32	0
230450	Gamma-glutamylcysteine Synthetase Deficiency, Hemolytic Anemia Dueto	basophil	0.480342	1	0.152	0.76	0
230450	Gamma-glutamylcysteine Synthetase Deficiency, Hemolytic Anemia Dueto	myelocyte	-0.458644	1	0.854	0.927	0
230450	Gamma-glutamylcysteine Synthetase Deficiency, Hemolytic Anemia Dueto	hematopoietic stem cell	-0.262695	1	0.862	0.927	0
230450	Gamma-glutamylcysteine Synthetase Deficiency, Hemolytic Anemia Dueto	macrophage	-0.37185	1	0.848	0.927	0
230450	Gamma-glutamylcysteine Synthetase Deficiency, Hemolytic Anemia Dueto	T cell	-0.334689	1	0.701	0.927	0
230450	Gamma-glutamylcysteine Synthetase Deficiency, Hemolytic Anemia Dueto	mature B cell	-0.377163	1	0.766	0.927	0
230450	Gamma-glutamylcysteine Synthetase Deficiency, Hemolytic Anemia Dueto	monocyte	-0.52021	1	0.871	0.927	0
230450	Gamma-glutamylcysteine Synthetase Deficiency, Hemolytic Anemia Dueto	conventional dendritic cell	-0.380249	1	0.927	0.927	0
230450	Gamma-glutamylcysteine Synthetase Deficiency, Hemolytic Anemia Dueto	promyelocyte	-0.402771	1	0.887	0.927	0
230450	Gamma-glutamylcysteine Synthetase Deficiency, Hemolytic Anemia Dueto	neutrophilic myeloblast	-0.434554	1	0.895	0.927	0
230450	Gamma-glutamylcysteine Synthetase Deficiency, Hemolytic Anemia Dueto	neutrophilic metamyelocyte	-0.707439	1	0.8	0.927	0
230450	Gamma-glutamylcysteine Synthetase Deficiency, Hemolytic Anemia Dueto	band form neutrophil	-0.772964	1	0.663	0.927	0
230450	Gamma-glutamylcysteine Synthetase Deficiency, Hemolytic Anemia Dueto	segmented neutrophil of bone marrow	-0.785461	1	0.684	0.927	0
230500	Gm1-gangliosidosis, Type I	proerythroblast	-0.886228	1	0.899	0.899	0
230500	Gm1-gangliosidosis, Type I	reticulocyte	-0.893487	1	0.552	0.87	0
230500	Gm1-gangliosidosis, Type I	erythroblast	-0.959585	1	0.666	0.87	0
230500	Gm1-gangliosidosis, Type I	plasma cell	2.05312	1	0.046	0.46	0
230500	Gm1-gangliosidosis, Type I	early pro-B cell	0.842753	1	0.219	0.87	0
230500	Gm1-gangliosidosis, Type I	precursor B cell	-0.129726	1	0.75	0.87	0
230500	Gm1-gangliosidosis, Type I	immature B cell	-0.225641	1	0.762	0.87	0
230500	Gm1-gangliosidosis, Type I	basophil	2.96962	1	0.012	0.24	0
230500	Gm1-gangliosidosis, Type I	myelocyte	0.33643	1	0.204	0.87	0
230500	Gm1-gangliosidosis, Type I	hematopoietic stem cell	0.429613	1	0.279	0.87	0
230500	Gm1-gangliosidosis, Type I	macrophage	-0.160804	1	0.734	0.87	0
230500	Gm1-gangliosidosis, Type I	T cell	-0.376293	1	0.764	0.87	0
230500	Gm1-gangliosidosis, Type I	mature B cell	-0.503384	1	0.841	0.885263	0
230500	Gm1-gangliosidosis, Type I	monocyte	-0.143513	1	0.648	0.87	0
230500	Gm1-gangliosidosis, Type I	conventional dendritic cell	-0.0147926	1	0.766	0.87	0
230500	Gm1-gangliosidosis, Type I	promyelocyte	0.181125	1	0.288	0.87	0
230500	Gm1-gangliosidosis, Type I	neutrophilic myeloblast	-0.148273	1	0.718	0.87	0
230500	Gm1-gangliosidosis, Type I	neutrophilic metamyelocyte	-0.689719	1	0.783	0.87	0
230500	Gm1-gangliosidosis, Type I	band form neutrophil	-0.82623	1	0.714	0.87	0
230500	Gm1-gangliosidosis, Type I	segmented neutrophil of bone marrow	-0.854983	1	0.711	0.87	0
230600	Gm1-gangliosidosis, Type Ii	proerythroblast	-0.886228	1	0.875	0.875	0
230600	Gm1-gangliosidosis, Type Ii	reticulocyte	-0.893487	1	0.547	0.855556	0
230600	Gm1-gangliosidosis, Type Ii	erythroblast	-0.959585	1	0.645	0.855556	0
230600	Gm1-gangliosidosis, Type Ii	plasma cell	2.05312	1	0.064	0.64	0
230600	Gm1-gangliosidosis, Type Ii	early pro-B cell	0.842753	1	0.242	0.855556	0
230600	Gm1-gangliosidosis, Type Ii	precursor B cell	-0.129726	1	0.722	0.855556	0
230600	Gm1-gangliosidosis, Type Ii	immature B cell	-0.225641	1	0.757	0.855556	0
230600	Gm1-gangliosidosis, Type Ii	basophil	2.96962	1	0.023	0.46	0
230600	Gm1-gangliosidosis, Type Ii	myelocyte	0.33643	1	0.203	0.855556	0
230600	Gm1-gangliosidosis, Type Ii	hematopoietic stem cell	0.429613	1	0.289	0.855556	0
230600	Gm1-gangliosidosis, Type Ii	macrophage	-0.160804	1	0.733	0.855556	0
230600	Gm1-gangliosidosis, Type Ii	T cell	-0.376293	1	0.738	0.855556	0
230600	Gm1-gangliosidosis, Type Ii	mature B cell	-0.503384	1	0.845	0.875	0
230600	Gm1-gangliosidosis, Type Ii	monocyte	-0.143513	1	0.675	0.855556	0
230600	Gm1-gangliosidosis, Type Ii	conventional dendritic cell	-0.0147926	1	0.742	0.855556	0
230600	Gm1-gangliosidosis, Type Ii	promyelocyte	0.181125	1	0.268	0.855556	0
230600	Gm1-gangliosidosis, Type Ii	neutrophilic myeloblast	-0.148273	1	0.698	0.855556	0
230600	Gm1-gangliosidosis, Type Ii	neutrophilic metamyelocyte	-0.689719	1	0.77	0.855556	0
230600	Gm1-gangliosidosis, Type Ii	band form neutrophil	-0.82623	1	0.715	0.855556	0
230600	Gm1-gangliosidosis, Type Ii	segmented neutrophil of bone marrow	-0.854983	1	0.722	0.855556	0
230650	Gm1-gangliosidosis, Type Iii	proerythroblast	-0.886228	1	0.902	0.902	0
230650	Gm1-gangliosidosis, Type Iii	reticulocyte	-0.893487	1	0.611	0.851111	0
230650	Gm1-gangliosidosis, Type Iii	erythroblast	-0.959585	1	0.664	0.851111	0
230650	Gm1-gangliosidosis, Type Iii	plasma cell	2.05312	1	0.06	0.6	0
230650	Gm1-gangliosidosis, Type Iii	early pro-B cell	0.842753	1	0.209	0.851111	0
230650	Gm1-gangliosidosis, Type Iii	precursor B cell	-0.129726	1	0.731	0.851111	0
230650	Gm1-gangliosidosis, Type Iii	immature B cell	-0.225641	1	0.766	0.851111	0
230650	Gm1-gangliosidosis, Type Iii	basophil	2.96962	1	0.011	0.22	0
230650	Gm1-gangliosidosis, Type Iii	myelocyte	0.33643	1	0.211	0.851111	0
230650	Gm1-gangliosidosis, Type Iii	hematopoietic stem cell	0.429613	1	0.298	0.851111	0
230650	Gm1-gangliosidosis, Type Iii	macrophage	-0.160804	1	0.729	0.851111	0
230650	Gm1-gangliosidosis, Type Iii	T cell	-0.376293	1	0.733	0.851111	0
230650	Gm1-gangliosidosis, Type Iii	mature B cell	-0.503384	1	0.851	0.895789	0
230650	Gm1-gangliosidosis, Type Iii	monocyte	-0.143513	1	0.62	0.851111	0
230650	Gm1-gangliosidosis, Type Iii	conventional dendritic cell	-0.0147926	1	0.742	0.851111	0
230650	Gm1-gangliosidosis, Type Iii	promyelocyte	0.181125	1	0.283	0.851111	0
230650	Gm1-gangliosidosis, Type Iii	neutrophilic myeloblast	-0.148273	1	0.727	0.851111	0
230650	Gm1-gangliosidosis, Type Iii	neutrophilic metamyelocyte	-0.689719	1	0.766	0.851111	0
230650	Gm1-gangliosidosis, Type Iii	band form neutrophil	-0.82623	1	0.709	0.851111	0
230650	Gm1-gangliosidosis, Type Iii	segmented neutrophil of bone marrow	-0.854983	1	0.722	0.851111	0
230800	Gaucher Disease, Type I	proerythroblast	-1.14718	1	0.944	0.955	0
230800	Gaucher Disease, Type I	reticulocyte	-1.05901	1	0.643	0.955	0
230800	Gaucher Disease, Type I	erythroblast	-1.30425	1	0.789	0.955	0
230800	Gaucher Disease, Type I	plasma cell	3.03383	1	0.034	0.68	0
230800	Gaucher Disease, Type I	early pro-B cell	0.400535	1	0.325	0.8125	0
230800	Gaucher Disease, Type I	precursor B cell	-0.680592	1	0.955	0.955	0
230800	Gaucher Disease, Type I	immature B cell	-0.330408	1	0.787	0.955	0
230800	Gaucher Disease, Type I	basophil	1.32043	1	0.072	0.72	0
230800	Gaucher Disease, Type I	myelocyte	-0.122269	1	0.662	0.955	0
230800	Gaucher Disease, Type I	hematopoietic stem cell	-0.325634	1	0.891	0.955	0
230800	Gaucher Disease, Type I	macrophage	0.368771	1	0.241	0.78	0
230800	Gaucher Disease, Type I	T cell	-0.0652385	1	0.544	0.955	0
230800	Gaucher Disease, Type I	mature B cell	-0.547349	1	0.869	0.955	0
230800	Gaucher Disease, Type I	monocyte	0.357122	1	0.187	0.748	0
230800	Gaucher Disease, Type I	conventional dendritic cell	0.810497	1	0.138	0.72	0
230800	Gaucher Disease, Type I	promyelocyte	0.235007	1	0.273	0.78	0
230800	Gaucher Disease, Type I	neutrophilic myeloblast	0.768652	1	0.144	0.72	0
230800	Gaucher Disease, Type I	neutrophilic metamyelocyte	-0.75212	1	0.826	0.955	0
230800	Gaucher Disease, Type I	band form neutrophil	-0.765362	1	0.7	0.955	0
230800	Gaucher Disease, Type I	segmented neutrophil of bone marrow	-0.195434	1	0.46	0.955	0
230900	Gaucher Disease, Type Ii	proerythroblast	-1.14718	1	0.954	0.954	0
230900	Gaucher Disease, Type Ii	reticulocyte	-1.05901	1	0.625	0.954	0
230900	Gaucher Disease, Type Ii	erythroblast	-1.30425	1	0.795	0.954	0
230900	Gaucher Disease, Type Ii	plasma cell	3.03383	1	0.028	0.56	0
230900	Gaucher Disease, Type Ii	early pro-B cell	0.400535	1	0.309	0.7725	0
230900	Gaucher Disease, Type Ii	precursor B cell	-0.680592	1	0.953	0.954	0
230900	Gaucher Disease, Type Ii	immature B cell	-0.330408	1	0.821	0.954	0
230900	Gaucher Disease, Type Ii	basophil	1.32043	1	0.076	0.72	0
230900	Gaucher Disease, Type Ii	myelocyte	-0.122269	1	0.648	0.954	0
230900	Gaucher Disease, Type Ii	hematopoietic stem cell	-0.325634	1	0.893	0.954	0
230900	Gaucher Disease, Type Ii	macrophage	0.368771	1	0.252	0.72	0
230900	Gaucher Disease, Type Ii	T cell	-0.0652385	1	0.57	0.954	0
230900	Gaucher Disease, Type Ii	mature B cell	-0.547349	1	0.846	0.954	0
230900	Gaucher Disease, Type Ii	monocyte	0.357122	1	0.201	0.72	0
230900	Gaucher Disease, Type Ii	conventional dendritic cell	0.810497	1	0.153	0.72	0
230900	Gaucher Disease, Type Ii	promyelocyte	0.235007	1	0.25	0.72	0
230900	Gaucher Disease, Type Ii	neutrophilic myeloblast	0.768652	1	0.144	0.72	0
230900	Gaucher Disease, Type Ii	neutrophilic metamyelocyte	-0.75212	1	0.823	0.954	0
230900	Gaucher Disease, Type Ii	band form neutrophil	-0.765362	1	0.69	0.954	0
230900	Gaucher Disease, Type Ii	segmented neutrophil of bone marrow	-0.195434	1	0.467	0.954	0
231000	Gaucher Disease, Type Iii	proerythroblast	-1.14718	1	0.941	0.965	0
231000	Gaucher Disease, Type Iii	reticulocyte	-1.05901	1	0.613	0.965	0
231000	Gaucher Disease, Type Iii	erythroblast	-1.30425	1	0.822	0.965	0
231000	Gaucher Disease, Type Iii	plasma cell	3.03383	1	0.037	0.61	0
231000	Gaucher Disease, Type Iii	early pro-B cell	0.400535	1	0.314	0.785	0
231000	Gaucher Disease, Type Iii	precursor B cell	-0.680592	1	0.965	0.965	0
231000	Gaucher Disease, Type Iii	immature B cell	-0.330408	1	0.845	0.965	0
231000	Gaucher Disease, Type Iii	basophil	1.32043	1	0.061	0.61	0
231000	Gaucher Disease, Type Iii	myelocyte	-0.122269	1	0.66	0.965	0
231000	Gaucher Disease, Type Iii	hematopoietic stem cell	-0.325634	1	0.881	0.965	0
231000	Gaucher Disease, Type Iii	macrophage	0.368771	1	0.265	0.785	0
231000	Gaucher Disease, Type Iii	T cell	-0.0652385	1	0.593	0.965	0
231000	Gaucher Disease, Type Iii	mature B cell	-0.547349	1	0.883	0.965	0
231000	Gaucher Disease, Type Iii	monocyte	0.357122	1	0.202	0.785	0
231000	Gaucher Disease, Type Iii	conventional dendritic cell	0.810497	1	0.13	0.7	0
231000	Gaucher Disease, Type Iii	promyelocyte	0.235007	1	0.276	0.785	0
231000	Gaucher Disease, Type Iii	neutrophilic myeloblast	0.768652	1	0.14	0.7	0
231000	Gaucher Disease, Type Iii	neutrophilic metamyelocyte	-0.75212	1	0.809	0.965	0
231000	Gaucher Disease, Type Iii	band form neutrophil	-0.765362	1	0.708	0.965	0
231000	Gaucher Disease, Type Iii	segmented neutrophil of bone marrow	-0.195434	1	0.456	0.965	0
231005	Gaucher Disease, Type Iiic	proerythroblast	-1.14718	1	0.948	0.957	0
231005	Gaucher Disease, Type Iiic	reticulocyte	-1.05901	1	0.638	0.957	0
231005	Gaucher Disease, Type Iiic	erythroblast	-1.30425	1	0.8	0.957	0
231005	Gaucher Disease, Type Iiic	plasma cell	3.03383	1	0.028	0.56	0
231005	Gaucher Disease, Type Iiic	early pro-B cell	0.400535	1	0.303	0.7575	0
231005	Gaucher Disease, Type Iiic	precursor B cell	-0.680592	1	0.957	0.957	0
231005	Gaucher Disease, Type Iiic	immature B cell	-0.330408	1	0.821	0.957	0
231005	Gaucher Disease, Type Iiic	basophil	1.32043	1	0.057	0.57	0
231005	Gaucher Disease, Type Iiic	myelocyte	-0.122269	1	0.635	0.957	0
231005	Gaucher Disease, Type Iiic	hematopoietic stem cell	-0.325634	1	0.885	0.957	0
231005	Gaucher Disease, Type Iiic	macrophage	0.368771	1	0.26	0.742857	0
231005	Gaucher Disease, Type Iiic	T cell	-0.0652385	1	0.565	0.957	0
231005	Gaucher Disease, Type Iiic	mature B cell	-0.547349	1	0.847	0.957	0
231005	Gaucher Disease, Type Iiic	monocyte	0.357122	1	0.182	0.728	0
231005	Gaucher Disease, Type Iiic	conventional dendritic cell	0.810497	1	0.146	0.728	0
231005	Gaucher Disease, Type Iiic	promyelocyte	0.235007	1	0.26	0.742857	0
231005	Gaucher Disease, Type Iiic	neutrophilic myeloblast	0.768652	1	0.14	0.728	0
231005	Gaucher Disease, Type Iiic	neutrophilic metamyelocyte	-0.75212	1	0.827	0.957	0
231005	Gaucher Disease, Type Iiic	band form neutrophil	-0.765362	1	0.694	0.957	0
231005	Gaucher Disease, Type Iiic	segmented neutrophil of bone marrow	-0.195434	1	0.442	0.957	0
231095	Ghosal Hematodiaphyseal Dysplasia	proerythroblast	-0.397893	1	0.688	0.993	0
231095	Ghosal Hematodiaphyseal Dysplasia	reticulocyte	-0.191363	1	0.349	0.698	0
231095	Ghosal Hematodiaphyseal Dysplasia	erythroblast	0.855443	1	0.054	0.305	0
231095	Ghosal Hematodiaphyseal Dysplasia	plasma cell	-0.957556	1	0.955	0.993	0
231095	Ghosal Hematodiaphyseal Dysplasia	early pro-B cell	-0.957556	1	0.991	0.993	0
231095	Ghosal Hematodiaphyseal Dysplasia	precursor B cell	-0.936175	1	0.993	0.993	0
231095	Ghosal Hematodiaphyseal Dysplasia	immature B cell	-0.957556	1	0.986	0.993	0
231095	Ghosal Hematodiaphyseal Dysplasia	basophil	0.218386	1	0.213	0.608571	0
231095	Ghosal Hematodiaphyseal Dysplasia	myelocyte	0.00969135	1	0.29	0.644444	0
231095	Ghosal Hematodiaphyseal Dysplasia	hematopoietic stem cell	2.49358	1	0.01	0.2	0
231095	Ghosal Hematodiaphyseal Dysplasia	macrophage	-0.957556	1	0.992	0.993	0
231095	Ghosal Hematodiaphyseal Dysplasia	T cell	-0.745407	1	0.941	0.993	0
231095	Ghosal Hematodiaphyseal Dysplasia	mature B cell	-0.957556	1	0.986	0.993	0
231095	Ghosal Hematodiaphyseal Dysplasia	monocyte	1.75586	1	0.025	0.25	0
231095	Ghosal Hematodiaphyseal Dysplasia	conventional dendritic cell	0.558049	1	0.212	0.608571	0
231095	Ghosal Hematodiaphyseal Dysplasia	promyelocyte	0.282519	1	0.247	0.6175	0
231095	Ghosal Hematodiaphyseal Dysplasia	neutrophilic myeloblast	0.832065	1	0.141	0.564	0
231095	Ghosal Hematodiaphyseal Dysplasia	neutrophilic metamyelocyte	-0.575003	1	0.705	0.993	0
231095	Ghosal Hematodiaphyseal Dysplasia	band form neutrophil	-0.426418	1	0.541	0.983636	0
231095	Ghosal Hematodiaphyseal Dysplasia	segmented neutrophil of bone marrow	1.05444	1	0.061	0.305	0
231900	Glutathione Synthetase Deficiency Of Erythrocytes, Hemolytic Anemiadue To	proerythroblast	0.258462	1	0.18	0.79	0
231900	Glutathione Synthetase Deficiency Of Erythrocytes, Hemolytic Anemiadue To	reticulocyte	-1.03383	1	0.62	0.864444	0
231900	Glutathione Synthetase Deficiency Of Erythrocytes, Hemolytic Anemiadue To	erythroblast	-0.613789	1	0.548	0.864444	0
231900	Glutathione Synthetase Deficiency Of Erythrocytes, Hemolytic Anemiadue To	plasma cell	-0.0567395	1	0.617	0.864444	0
231900	Glutathione Synthetase Deficiency Of Erythrocytes, Hemolytic Anemiadue To	early pro-B cell	-0.169497	1	0.754	0.864444	0
231900	Glutathione Synthetase Deficiency Of Erythrocytes, Hemolytic Anemiadue To	precursor B cell	-0.196866	1	0.762	0.864444	0
231900	Glutathione Synthetase Deficiency Of Erythrocytes, Hemolytic Anemiadue To	immature B cell	-0.26374	1	0.778	0.864444	0
231900	Glutathione Synthetase Deficiency Of Erythrocytes, Hemolytic Anemiadue To	basophil	3.61006	1	0.01	0.2	0
231900	Glutathione Synthetase Deficiency Of Erythrocytes, Hemolytic Anemiadue To	myelocyte	0.315015	1	0.217	0.79	0
231900	Glutathione Synthetase Deficiency Of Erythrocytes, Hemolytic Anemiadue To	hematopoietic stem cell	0.0441566	1	0.409	0.864444	0
231900	Glutathione Synthetase Deficiency Of Erythrocytes, Hemolytic Anemiadue To	macrophage	-0.324962	1	0.822	0.865263	0
231900	Glutathione Synthetase Deficiency Of Erythrocytes, Hemolytic Anemiadue To	T cell	-0.0136308	1	0.589	0.864444	0
231900	Glutathione Synthetase Deficiency Of Erythrocytes, Hemolytic Anemiadue To	mature B cell	-1.03383	1	0.992	0.992	0
231900	Glutathione Synthetase Deficiency Of Erythrocytes, Hemolytic Anemiadue To	monocyte	0.231836	1	0.237	0.79	0
231900	Glutathione Synthetase Deficiency Of Erythrocytes, Hemolytic Anemiadue To	conventional dendritic cell	0.282588	1	0.323	0.864444	0
231900	Glutathione Synthetase Deficiency Of Erythrocytes, Hemolytic Anemiadue To	promyelocyte	0.665199	1	0.14	0.79	0
231900	Glutathione Synthetase Deficiency Of Erythrocytes, Hemolytic Anemiadue To	neutrophilic myeloblast	0.704998	1	0.162	0.79	0
231900	Glutathione Synthetase Deficiency Of Erythrocytes, Hemolytic Anemiadue To	neutrophilic metamyelocyte	-0.690311	1	0.777	0.864444	0
231900	Glutathione Synthetase Deficiency Of Erythrocytes, Hemolytic Anemiadue To	band form neutrophil	-0.954136	1	0.777	0.864444	0
231900	Glutathione Synthetase Deficiency Of Erythrocytes, Hemolytic Anemiadue To	segmented neutrophil of bone marrow	-0.760977	1	0.659	0.864444	0
232220	Glycogen Storage Disease Ib	proerythroblast	-0.896437	1	0.874	0.929	0
232220	Glycogen Storage Disease Ib	reticulocyte	-1.48471	1	0.838	0.929	0
232220	Glycogen Storage Disease Ib	erythroblast	-1.61519	1	0.915	0.929	0
232220	Glycogen Storage Disease Ib	plasma cell	-0.850745	1	0.903	0.929	0
232220	Glycogen Storage Disease Ib	early pro-B cell	0.0849768	1	0.394	0.716364	0
232220	Glycogen Storage Disease Ib	precursor B cell	-0.41132	1	0.862	0.929	0
232220	Glycogen Storage Disease Ib	immature B cell	1.09189	1	0.198	0.44	0
232220	Glycogen Storage Disease Ib	basophil	0.378676	1	0.193	0.44	0
232220	Glycogen Storage Disease Ib	myelocyte	1.22363	1	0.042	0.396	0
232220	Glycogen Storage Disease Ib	hematopoietic stem cell	0.401771	1	0.282	0.564	0
232220	Glycogen Storage Disease Ib	macrophage	1.35437	1	0.086	0.396	0
232220	Glycogen Storage Disease Ib	T cell	0.203092	1	0.167	0.44	0
232220	Glycogen Storage Disease Ib	mature B cell	0.803649	1	0.099	0.396	0
232220	Glycogen Storage Disease Ib	monocyte	0.364997	1	0.179	0.44	0
232220	Glycogen Storage Disease Ib	conventional dendritic cell	-0.419373	1	0.929	0.929	0
232220	Glycogen Storage Disease Ib	promyelocyte	0.833055	1	0.096	0.396	0
232220	Glycogen Storage Disease Ib	neutrophilic myeloblast	1.75496	1	0.027	0.396	0
232220	Glycogen Storage Disease Ib	neutrophilic metamyelocyte	-0.566317	1	0.706	0.929	0
232220	Glycogen Storage Disease Ib	band form neutrophil	-1.00275	1	0.808	0.929	0
232220	Glycogen Storage Disease Ib	segmented neutrophil of bone marrow	-1.24823	1	0.861	0.929	0
233650	Combined Cellular And Humoral Immune Defects With Granulomas	proerythroblast	-0.359703	2	0.691	0.961	0
233650	Combined Cellular And Humoral Immune Defects With Granulomas	reticulocyte	-0.325594	2	0.25	0.961	0
233650	Combined Cellular And Humoral Immune Defects With Granulomas	erythroblast	-0.335295	2	0.34	0.961	0
233650	Combined Cellular And Humoral Immune Defects With Granulomas	plasma cell	-0.362838	2	0.778	0.961	0
233650	Combined Cellular And Humoral Immune Defects With Granulomas	early pro-B cell	3.86104	2	0.001	0.02	1
233650	Combined Cellular And Humoral Immune Defects With Granulomas	precursor B cell	0.727554	2	0.161	0.961	0
233650	Combined Cellular And Humoral Immune Defects With Granulomas	immature B cell	1.13057	2	0.137	0.961	0
233650	Combined Cellular And Humoral Immune Defects With Granulomas	basophil	-0.362838	2	0.854	0.961	0
233650	Combined Cellular And Humoral Immune Defects With Granulomas	myelocyte	-0.357239	2	0.881	0.961	0
233650	Combined Cellular And Humoral Immune Defects With Granulomas	hematopoietic stem cell	-0.142962	2	0.849	0.961	0
233650	Combined Cellular And Humoral Immune Defects With Granulomas	macrophage	-0.309203	2	0.876	0.961	0
233650	Combined Cellular And Humoral Immune Defects With Granulomas	T cell	-0.35523	2	0.802	0.961	0
233650	Combined Cellular And Humoral Immune Defects With Granulomas	mature B cell	-0.326214	2	0.803	0.961	0
233650	Combined Cellular And Humoral Immune Defects With Granulomas	monocyte	-0.34974	2	0.888	0.961	0
233650	Combined Cellular And Humoral Immune Defects With Granulomas	conventional dendritic cell	-0.339069	2	0.961	0.961	0
233650	Combined Cellular And Humoral Immune Defects With Granulomas	promyelocyte	-0.35286	2	0.943	0.961	0
233650	Combined Cellular And Humoral Immune Defects With Granulomas	neutrophilic myeloblast	-0.362838	2	0.907	0.961	0
233650	Combined Cellular And Humoral Immune Defects With Granulomas	neutrophilic metamyelocyte	-0.356218	2	0.571	0.961	0
233650	Combined Cellular And Humoral Immune Defects With Granulomas	band form neutrophil	-0.358487	2	0.444	0.961	0
233650	Combined Cellular And Humoral Immune Defects With Granulomas	segmented neutrophil of bone marrow	-0.362838	2	0.448	0.961	0
PS306400	Granulomatous disease, chronic	proerythroblast	-0.908796	4	0.987	0.999	0
PS306400	Granulomatous disease, chronic	reticulocyte	-0.78622	4	0.573	0.999	0
PS306400	Granulomatous disease, chronic	erythroblast	-0.849931	4	0.729	0.999	0
PS306400	Granulomatous disease, chronic	plasma cell	-0.40401	4	0.862	0.999	0
PS306400	Granulomatous disease, chronic	early pro-B cell	-0.80869	4	0.998	0.999	0
PS306400	Granulomatous disease, chronic	precursor B cell	-0.757774	4	0.999	0.999	0
PS306400	Granulomatous disease, chronic	immature B cell	-0.784929	4	0.999	0.999	0
PS306400	Granulomatous disease, chronic	basophil	-0.0132518	4	0.554	0.999	0
PS306400	Granulomatous disease, chronic	myelocyte	-0.164578	4	0.752	0.999	0
PS306400	Granulomatous disease, chronic	hematopoietic stem cell	-0.650232	4	0.999	0.999	0
PS306400	Granulomatous disease, chronic	macrophage	0.11801	4	0.316	0.902857	0
PS306400	Granulomatous disease, chronic	T cell	-0.759554	4	0.997	0.999	0
PS306400	Granulomatous disease, chronic	mature B cell	-0.060648	4	0.566	0.999	0
PS306400	Granulomatous disease, chronic	monocyte	1.6654	4	0.002	0.01	1
PS306400	Granulomatous disease, chronic	conventional dendritic cell	-0.0325574	4	0.804	0.999	0
PS306400	Granulomatous disease, chronic	promyelocyte	0.261928	4	0.166	0.553333	0
PS306400	Granulomatous disease, chronic	neutrophilic myeloblast	0.445173	4	0.102	0.408	0
PS306400	Granulomatous disease, chronic	neutrophilic metamyelocyte	1.38924	4	0	0	1
PS306400	Granulomatous disease, chronic	band form neutrophil	1.96727	4	0	0	1
PS306400	Granulomatous disease, chronic	segmented neutrophil of bone marrow	1.81743	4	0	0	1
PS235400	Hemolytic uremic syndrome	proerythroblast	-0.686544	3	0.899	0.973	0
PS235400	Hemolytic uremic syndrome	reticulocyte	-0.570779	3	0.412	0.973	0
PS235400	Hemolytic uremic syndrome	erythroblast	-0.592991	3	0.536	0.973	0
PS235400	Hemolytic uremic syndrome	plasma cell	-0.451455	3	0.844	0.973	0
PS235400	Hemolytic uremic syndrome	early pro-B cell	-0.535089	3	0.971	0.973	0
PS235400	Hemolytic uremic syndrome	precursor B cell	-0.451455	3	0.968	0.973	0
PS235400	Hemolytic uremic syndrome	immature B cell	-0.380152	3	0.938	0.973	0
PS235400	Hemolytic uremic syndrome	basophil	-0.687701	3	0.973	0.973	0
PS235400	Hemolytic uremic syndrome	myelocyte	-0.451455	3	0.933	0.973	0
PS235400	Hemolytic uremic syndrome	hematopoietic stem cell	-0.180384	3	0.905	0.973	0
PS235400	Hemolytic uremic syndrome	macrophage	-0.451455	3	0.968	0.973	0
PS235400	Hemolytic uremic syndrome	T cell	-0.460578	3	0.897	0.973	0
PS235400	Hemolytic uremic syndrome	mature B cell	-0.451455	3	0.929	0.973	0
PS235400	Hemolytic uremic syndrome	monocyte	1.34031	3	0.012	0.24	0
PS235400	Hemolytic uremic syndrome	conventional dendritic cell	0.645667	3	0.096	0.64	0
PS235400	Hemolytic uremic syndrome	promyelocyte	0.265825	3	0.172	0.86	0
PS235400	Hemolytic uremic syndrome	neutrophilic myeloblast	0.882508	3	0.029	0.29	0
PS235400	Hemolytic uremic syndrome	neutrophilic metamyelocyte	-0.419551	3	0.677	0.973	0
PS235400	Hemolytic uremic syndrome	band form neutrophil	-0.431188	3	0.546	0.973	0
PS235400	Hemolytic uremic syndrome	segmented neutrophil of bone marrow	-0.451455	3	0.573	0.973	0
235700	Hexokinase Deficiency Hemolytic Anemia	proerythroblast	3.29893	1	0.015	0.3	0
235700	Hexokinase Deficiency Hemolytic Anemia	reticulocyte	-1.01424	1	0.639	0.984	0
235700	Hexokinase Deficiency Hemolytic Anemia	erythroblast	1.35306	1	0.038	0.38	0
235700	Hexokinase Deficiency Hemolytic Anemia	plasma cell	-0.716103	1	0.879	0.984	0
235700	Hexokinase Deficiency Hemolytic Anemia	early pro-B cell	0.506133	1	0.271	0.774286	0
235700	Hexokinase Deficiency Hemolytic Anemia	precursor B cell	-0.730702	1	0.964	0.984	0
235700	Hexokinase Deficiency Hemolytic Anemia	immature B cell	-0.965983	1	0.984	0.984	0
235700	Hexokinase Deficiency Hemolytic Anemia	basophil	0.268012	1	0.196	0.726667	0
235700	Hexokinase Deficiency Hemolytic Anemia	myelocyte	0.168354	1	0.218	0.726667	0
235700	Hexokinase Deficiency Hemolytic Anemia	hematopoietic stem cell	1.13611	1	0.102	0.68	0
235700	Hexokinase Deficiency Hemolytic Anemia	macrophage	-0.501841	1	0.924	0.984	0
235700	Hexokinase Deficiency Hemolytic Anemia	T cell	0.0757967	1	0.212	0.726667	0
235700	Hexokinase Deficiency Hemolytic Anemia	mature B cell	-0.719485	1	0.933	0.984	0
235700	Hexokinase Deficiency Hemolytic Anemia	monocyte	-0.295573	1	0.718	0.984	0
235700	Hexokinase Deficiency Hemolytic Anemia	conventional dendritic cell	-0.377869	1	0.925	0.984	0
235700	Hexokinase Deficiency Hemolytic Anemia	promyelocyte	-0.215344	1	0.781	0.984	0
235700	Hexokinase Deficiency Hemolytic Anemia	neutrophilic myeloblast	-0.619428	1	0.947	0.984	0
235700	Hexokinase Deficiency Hemolytic Anemia	neutrophilic metamyelocyte	-0.0906123	1	0.459	0.984	0
235700	Hexokinase Deficiency Hemolytic Anemia	band form neutrophil	-0.15586	1	0.44	0.984	0
235700	Hexokinase Deficiency Hemolytic Anemia	segmented neutrophil of bone marrow	-0.40336	1	0.544	0.984	0
PS607594	Immunodeficiency, common variable	proerythroblast	-0.54243	6	0.932	0.994	0
PS607594	Immunodeficiency, common variable	reticulocyte	-1.04865	6	0.783	0.994	0
PS607594	Immunodeficiency, common variable	erythroblast	-1.05069	6	0.869	0.994	0
PS607594	Immunodeficiency, common variable	plasma cell	0.903371	6	0.01	0.06	0
PS607594	Immunodeficiency, common variable	early pro-B cell	-0.231725	6	0.935	0.994	0
PS607594	Immunodeficiency, common variable	precursor B cell	0.610684	6	0.054	0.216	0
PS607594	Immunodeficiency, common variable	immature B cell	0.230119	6	0.267	0.805714	0
PS607594	Immunodeficiency, common variable	basophil	-0.0307902	6	0.598	0.994	0
PS607594	Immunodeficiency, common variable	myelocyte	-0.375945	6	0.968	0.994	0
PS607594	Immunodeficiency, common variable	hematopoietic stem cell	0.189461	6	0.282	0.805714	0
PS607594	Immunodeficiency, common variable	macrophage	1.49719	6	0.001	0.02	1
PS607594	Immunodeficiency, common variable	T cell	-0.0014598	6	0.461	0.994	0
PS607594	Immunodeficiency, common variable	mature B cell	0.547059	6	0.011	0.06	0
PS607594	Immunodeficiency, common variable	monocyte	-0.363656	6	0.969	0.994	0
PS607594	Immunodeficiency, common variable	conventional dendritic cell	0.770865	6	0.012	0.06	0
PS607594	Immunodeficiency, common variable	promyelocyte	-0.341106	6	0.994	0.994	0
PS607594	Immunodeficiency, common variable	neutrophilic myeloblast	-0.311859	6	0.959	0.994	0
PS607594	Immunodeficiency, common variable	neutrophilic metamyelocyte	-0.536392	6	0.874	0.994	0
PS607594	Immunodeficiency, common variable	band form neutrophil	-0.396777	6	0.557	0.994	0
PS607594	Immunodeficiency, common variable	segmented neutrophil of bone marrow	-0.657062	6	0.785	0.994	0
241500	Hypophosphatasia, Infantile	proerythroblast	-0.481294	1	0.736	0.932	0
241500	Hypophosphatasia, Infantile	reticulocyte	-0.481294	1	0.423	0.932	0
241500	Hypophosphatasia, Infantile	erythroblast	-0.481294	1	0.454	0.932	0
241500	Hypophosphatasia, Infantile	plasma cell	2.58449	1	0.039	0.39	0
241500	Hypophosphatasia, Infantile	early pro-B cell	0.39509	1	0.309	0.932	0
241500	Hypophosphatasia, Infantile	precursor B cell	2.49273	1	0.003	0.06	1
241500	Hypophosphatasia, Infantile	immature B cell	1.64525	1	0.106	0.706667	0
241500	Hypophosphatasia, Infantile	basophil	-0.314081	1	0.731	0.932	0
241500	Hypophosphatasia, Infantile	myelocyte	-0.481294	1	0.841	0.932	0
241500	Hypophosphatasia, Infantile	hematopoietic stem cell	-0.371116	1	0.916	0.932	0
241500	Hypophosphatasia, Infantile	macrophage	-0.481294	1	0.893	0.932	0
241500	Hypophosphatasia, Infantile	T cell	-0.481294	1	0.808	0.932	0
241500	Hypophosphatasia, Infantile	mature B cell	-0.251211	1	0.724	0.932	0
241500	Hypophosphatasia, Infantile	monocyte	-0.481294	1	0.86	0.932	0
241500	Hypophosphatasia, Infantile	conventional dendritic cell	-0.405631	1	0.922	0.932	0
241500	Hypophosphatasia, Infantile	promyelocyte	-0.481294	1	0.932	0.932	0
241500	Hypophosphatasia, Infantile	neutrophilic myeloblast	-0.481294	1	0.901	0.932	0
241500	Hypophosphatasia, Infantile	neutrophilic metamyelocyte	-0.481294	1	0.642	0.932	0
241500	Hypophosphatasia, Infantile	band form neutrophil	-0.481294	1	0.542	0.932	0
241500	Hypophosphatasia, Infantile	segmented neutrophil of bone marrow	-0.481294	1	0.586	0.932	0
PS242860	Immunodeficiency-centromeric instability-facial anomalies	proerythroblast	-0.535512	1	0.728	0.909412	0
PS242860	Immunodeficiency-centromeric instability-facial anomalies	reticulocyte	-0.746668	1	0.531	0.909412	0
PS242860	Immunodeficiency-centromeric instability-facial anomalies	erythroblast	-0.746668	1	0.603	0.909412	0
PS242860	Immunodeficiency-centromeric instability-facial anomalies	plasma cell	-0.746668	1	0.881	0.914	0
PS242860	Immunodeficiency-centromeric instability-facial anomalies	early pro-B cell	-0.209704	1	0.764	0.909412	0
PS242860	Immunodeficiency-centromeric instability-facial anomalies	precursor B cell	0.710771	1	0.223	0.642857	0
PS242860	Immunodeficiency-centromeric instability-facial anomalies	immature B cell	-0.652499	1	0.914	0.914	0
PS242860	Immunodeficiency-centromeric instability-facial anomalies	basophil	0.167002	1	0.225	0.642857	0
PS242860	Immunodeficiency-centromeric instability-facial anomalies	myelocyte	0.753544	1	0.116	0.642857	0
PS242860	Immunodeficiency-centromeric instability-facial anomalies	hematopoietic stem cell	3.55388	1	0.001	0.02	1
PS242860	Immunodeficiency-centromeric instability-facial anomalies	macrophage	-0.191421	1	0.735	0.909412	0
PS242860	Immunodeficiency-centromeric instability-facial anomalies	T cell	0.493029	1	0.125	0.642857	0
PS242860	Immunodeficiency-centromeric instability-facial anomalies	mature B cell	-0.309277	1	0.739	0.909412	0
PS242860	Immunodeficiency-centromeric instability-facial anomalies	monocyte	-0.449263	1	0.847	0.914	0
PS242860	Immunodeficiency-centromeric instability-facial anomalies	conventional dendritic cell	0.70351	1	0.162	0.642857	0
PS242860	Immunodeficiency-centromeric instability-facial anomalies	promyelocyte	-0.0415271	1	0.687	0.909412	0
PS242860	Immunodeficiency-centromeric instability-facial anomalies	neutrophilic myeloblast	0.426075	1	0.189	0.642857	0
PS242860	Immunodeficiency-centromeric instability-facial anomalies	neutrophilic metamyelocyte	-0.685262	1	0.773	0.909412	0
PS242860	Immunodeficiency-centromeric instability-facial anomalies	band form neutrophil	-0.746668	1	0.672	0.909412	0
PS242860	Immunodeficiency-centromeric instability-facial anomalies	segmented neutrophil of bone marrow	-0.746668	1	0.681	0.909412	0
242900	Immunoosseous Dysplasia, Schimke Type	proerythroblast	-0.684792	1	0.816	0.906667	0
242900	Immunoosseous Dysplasia, Schimke Type	reticulocyte	-0.846425	1	0.529	0.891765	0
242900	Immunoosseous Dysplasia, Schimke Type	erythroblast	-1.16955	1	0.738	0.891765	0
242900	Immunoosseous Dysplasia, Schimke Type	plasma cell	-1.16955	1	0.973	0.987	0
242900	Immunoosseous Dysplasia, Schimke Type	early pro-B cell	2.49277	1	0.044	0.71	0
242900	Immunoosseous Dysplasia, Schimke Type	precursor B cell	1.05524	1	0.164	0.74	0
242900	Immunoosseous Dysplasia, Schimke Type	immature B cell	2.08695	1	0.071	0.71	0
242900	Immunoosseous Dysplasia, Schimke Type	basophil	-0.243091	1	0.692	0.891765	0
242900	Immunoosseous Dysplasia, Schimke Type	myelocyte	0.422369	1	0.185	0.74	0
242900	Immunoosseous Dysplasia, Schimke Type	hematopoietic stem cell	0.405997	1	0.276	0.782222	0
242900	Immunoosseous Dysplasia, Schimke Type	macrophage	0.0331313	1	0.352	0.782222	0
242900	Immunoosseous Dysplasia, Schimke Type	T cell	-1.07739	1	0.987	0.987	0
242900	Immunoosseous Dysplasia, Schimke Type	mature B cell	0.143649	1	0.222	0.74	0
242900	Immunoosseous Dysplasia, Schimke Type	monocyte	0.520741	1	0.154	0.74	0
242900	Immunoosseous Dysplasia, Schimke Type	conventional dendritic cell	-0.0876794	1	0.758	0.891765	0
242900	Immunoosseous Dysplasia, Schimke Type	promyelocyte	-0.095958	1	0.705	0.891765	0
242900	Immunoosseous Dysplasia, Schimke Type	neutrophilic myeloblast	0.12522	1	0.316	0.782222	0
242900	Immunoosseous Dysplasia, Schimke Type	neutrophilic metamyelocyte	-0.198404	1	0.477	0.891765	0
242900	Immunoosseous Dysplasia, Schimke Type	band form neutrophil	-0.874008	1	0.752	0.891765	0
242900	Immunoosseous Dysplasia, Schimke Type	segmented neutrophil of bone marrow	-0.839233	1	0.712	0.891765	0
243150	Gastrointestinal Defects And Immunodeficiency Syndrome	proerythroblast	-0.570632	1	0.741	0.878947	0
243150	Gastrointestinal Defects And Immunodeficiency Syndrome	reticulocyte	-1.32304	1	0.742	0.878947	0
243150	Gastrointestinal Defects And Immunodeficiency Syndrome	erythroblast	-1.35506	1	0.835	0.878947	0
243150	Gastrointestinal Defects And Immunodeficiency Syndrome	plasma cell	-0.296234	1	0.656	0.878947	0
243150	Gastrointestinal Defects And Immunodeficiency Syndrome	early pro-B cell	-1.13013	1	0.997	0.997	0
243150	Gastrointestinal Defects And Immunodeficiency Syndrome	precursor B cell	-0.14034	1	0.722	0.878947	0
243150	Gastrointestinal Defects And Immunodeficiency Syndrome	immature B cell	-0.33829	1	0.823	0.878947	0
243150	Gastrointestinal Defects And Immunodeficiency Syndrome	basophil	-0.452473	1	0.811	0.878947	0
243150	Gastrointestinal Defects And Immunodeficiency Syndrome	myelocyte	-0.424709	1	0.826	0.878947	0
243150	Gastrointestinal Defects And Immunodeficiency Syndrome	hematopoietic stem cell	-0.101996	1	0.781	0.878947	0
243150	Gastrointestinal Defects And Immunodeficiency Syndrome	macrophage	1.02031	1	0.119	0.47	0
243150	Gastrointestinal Defects And Immunodeficiency Syndrome	T cell	-0.147974	1	0.612	0.878947	0
243150	Gastrointestinal Defects And Immunodeficiency Syndrome	mature B cell	0.451797	1	0.141	0.47	0
243150	Gastrointestinal Defects And Immunodeficiency Syndrome	monocyte	1.57423	1	0.03	0.3	0
243150	Gastrointestinal Defects And Immunodeficiency Syndrome	conventional dendritic cell	2.47052	1	0.009	0.18	0
243150	Gastrointestinal Defects And Immunodeficiency Syndrome	promyelocyte	0.836107	1	0.101	0.47	0
243150	Gastrointestinal Defects And Immunodeficiency Syndrome	neutrophilic myeloblast	1.3287	1	0.054	0.36	0
243150	Gastrointestinal Defects And Immunodeficiency Syndrome	neutrophilic metamyelocyte	-0.382766	1	0.604	0.878947	0
243150	Gastrointestinal Defects And Immunodeficiency Syndrome	band form neutrophil	-0.837077	1	0.73	0.878947	0
243150	Gastrointestinal Defects And Immunodeficiency Syndrome	segmented neutrophil of bone marrow	-0.180927	1	0.469	0.878947	0
243500	Isovaleric Acidemia	proerythroblast	-0.874462	1	0.894	0.941053	0
243500	Isovaleric Acidemia	reticulocyte	-1.13403	1	0.651	0.941053	0
243500	Isovaleric Acidemia	erythroblast	-1.02562	1	0.668	0.941053	0
243500	Isovaleric Acidemia	plasma cell	-0.769079	1	0.873	0.941053	0
243500	Isovaleric Acidemia	early pro-B cell	1.78122	1	0.096	0.384444	0
243500	Isovaleric Acidemia	precursor B cell	0.879041	1	0.159	0.384444	0
243500	Isovaleric Acidemia	immature B cell	1.6937	1	0.126	0.384444	0
243500	Isovaleric Acidemia	basophil	-0.561325	1	0.883	0.941053	0
243500	Isovaleric Acidemia	myelocyte	0.65601	1	0.124	0.384444	0
243500	Isovaleric Acidemia	hematopoietic stem cell	1.09367	1	0.111	0.384444	0
243500	Isovaleric Acidemia	macrophage	0.40832	1	0.234	0.468	0
243500	Isovaleric Acidemia	T cell	0.287962	1	0.161	0.384444	0
243500	Isovaleric Acidemia	mature B cell	-0.345127	1	0.751	0.941053	0
243500	Isovaleric Acidemia	monocyte	-0.574197	1	0.894	0.941053	0
243500	Isovaleric Acidemia	conventional dendritic cell	0.915351	1	0.11	0.384444	0
243500	Isovaleric Acidemia	promyelocyte	0.491756	1	0.173	0.384444	0
243500	Isovaleric Acidemia	neutrophilic myeloblast	0.666781	1	0.172	0.384444	0
243500	Isovaleric Acidemia	neutrophilic metamyelocyte	-1.10379	1	0.969	0.969	0
243500	Isovaleric Acidemia	band form neutrophil	-1.14656	1	0.875	0.941053	0
243500	Isovaleric Acidemia	segmented neutrophil of bone marrow	-1.33962	1	0.892	0.941053	0
PS245480	Specific granule deficiency	proerythroblast	-0.485446	2	0.773	0.908421	0
PS245480	Specific granule deficiency	reticulocyte	-0.724152	2	0.526	0.908421	0
PS245480	Specific granule deficiency	erythroblast	-0.804895	2	0.659	0.908421	0
PS245480	Specific granule deficiency	plasma cell	-0.639972	2	0.925	0.925	0
PS245480	Specific granule deficiency	early pro-B cell	1.1284	2	0.141	0.705	0
PS245480	Specific granule deficiency	precursor B cell	0.505327	2	0.259	0.863333	0
PS245480	Specific granule deficiency	immature B cell	0.766534	2	0.23	0.863333	0
PS245480	Specific granule deficiency	basophil	-0.318902	2	0.811	0.908421	0
PS245480	Specific granule deficiency	myelocyte	0.640748	2	0.078	0.52	0
PS245480	Specific granule deficiency	hematopoietic stem cell	-0.119832	2	0.806	0.908421	0
PS245480	Specific granule deficiency	macrophage	-0.285419	2	0.863	0.908421	0
PS245480	Specific granule deficiency	T cell	-0.398599	2	0.832	0.908421	0
PS245480	Specific granule deficiency	mature B cell	-0.276749	2	0.749	0.908421	0
PS245480	Specific granule deficiency	monocyte	-0.322425	2	0.848	0.908421	0
PS245480	Specific granule deficiency	conventional dendritic cell	-0.152154	2	0.849	0.908421	0
PS245480	Specific granule deficiency	promyelocyte	-0.184941	2	0.827	0.908421	0
PS245480	Specific granule deficiency	neutrophilic myeloblast	-0.166336	2	0.747	0.908421	0
PS245480	Specific granule deficiency	neutrophilic metamyelocyte	1.49803	2	0.001	0.02	1
PS245480	Specific granule deficiency	band form neutrophil	0.577605	2	0.052	0.52	0
PS245480	Specific granule deficiency	segmented neutrophil of bone marrow	-0.236821	2	0.352	0.908421	0
246450	3-hydroxy-3-methylglutaryl-coa Lyase Deficiency	proerythroblast	0.693749	1	0.144	0.465	0
246450	3-hydroxy-3-methylglutaryl-coa Lyase Deficiency	reticulocyte	-1.84205	1	0.95	0.997	0
246450	3-hydroxy-3-methylglutaryl-coa Lyase Deficiency	erythroblast	-1.60905	1	0.929	0.997	0
246450	3-hydroxy-3-methylglutaryl-coa Lyase Deficiency	plasma cell	-1.48275	1	0.997	0.997	0
246450	3-hydroxy-3-methylglutaryl-coa Lyase Deficiency	early pro-B cell	-0.380753	1	0.864	0.997	0
246450	3-hydroxy-3-methylglutaryl-coa Lyase Deficiency	precursor B cell	0.314261	1	0.293	0.586	0
246450	3-hydroxy-3-methylglutaryl-coa Lyase Deficiency	immature B cell	0.496537	1	0.279	0.586	0
246450	3-hydroxy-3-methylglutaryl-coa Lyase Deficiency	basophil	-0.912157	1	0.981	0.997	0
246450	3-hydroxy-3-methylglutaryl-coa Lyase Deficiency	myelocyte	0.359879	1	0.186	0.465	0
246450	3-hydroxy-3-methylglutaryl-coa Lyase Deficiency	hematopoietic stem cell	-0.382563	1	0.912	0.997	0
246450	3-hydroxy-3-methylglutaryl-coa Lyase Deficiency	macrophage	1.48731	1	0.085	0.436	0
246450	3-hydroxy-3-methylglutaryl-coa Lyase Deficiency	T cell	-0.535778	1	0.828	0.997	0
246450	3-hydroxy-3-methylglutaryl-coa Lyase Deficiency	mature B cell	-0.0405437	1	0.591	0.985	0
246450	3-hydroxy-3-methylglutaryl-coa Lyase Deficiency	monocyte	1.7889	1	0.032	0.436	0
246450	3-hydroxy-3-methylglutaryl-coa Lyase Deficiency	conventional dendritic cell	0.703824	1	0.181	0.465	0
246450	3-hydroxy-3-methylglutaryl-coa Lyase Deficiency	promyelocyte	0.948627	1	0.073	0.436	0
246450	3-hydroxy-3-methylglutaryl-coa Lyase Deficiency	neutrophilic myeloblast	0.954449	1	0.109	0.436	0
246450	3-hydroxy-3-methylglutaryl-coa Lyase Deficiency	neutrophilic metamyelocyte	-0.610236	1	0.754	0.997	0
246450	3-hydroxy-3-methylglutaryl-coa Lyase Deficiency	band form neutrophil	-0.399538	1	0.51	0.927273	0
246450	3-hydroxy-3-methylglutaryl-coa Lyase Deficiency	segmented neutrophil of bone marrow	0.447882	1	0.101	0.436	0
248500	Mannosidosis, Alpha B, Lysosomal	proerythroblast	-1.03095	1	0.924	0.975	0
248500	Mannosidosis, Alpha B, Lysosomal	reticulocyte	-0.878791	1	0.563	0.975	0
248500	Mannosidosis, Alpha B, Lysosomal	erythroblast	-0.985392	1	0.678	0.975	0
248500	Mannosidosis, Alpha B, Lysosomal	plasma cell	0.713731	1	0.145	0.483333	0
248500	Mannosidosis, Alpha B, Lysosomal	early pro-B cell	-0.666897	1	0.942	0.975	0
248500	Mannosidosis, Alpha B, Lysosomal	precursor B cell	-0.788674	1	0.972	0.975	0
248500	Mannosidosis, Alpha B, Lysosomal	immature B cell	-0.866623	1	0.975	0.975	0
248500	Mannosidosis, Alpha B, Lysosomal	basophil	3.0165	1	0.014	0.28	0
248500	Mannosidosis, Alpha B, Lysosomal	myelocyte	0.37065	1	0.184	0.525714	0
248500	Mannosidosis, Alpha B, Lysosomal	hematopoietic stem cell	-0.401243	1	0.933	0.975	0
248500	Mannosidosis, Alpha B, Lysosomal	macrophage	-0.0426844	1	0.687	0.975	0
248500	Mannosidosis, Alpha B, Lysosomal	T cell	-0.578839	1	0.86	0.975	0
248500	Mannosidosis, Alpha B, Lysosomal	mature B cell	-0.482864	1	0.83	0.975	0
248500	Mannosidosis, Alpha B, Lysosomal	monocyte	1.35261	1	0.06	0.483333	0
248500	Mannosidosis, Alpha B, Lysosomal	conventional dendritic cell	0.406678	1	0.271	0.6775	0
248500	Mannosidosis, Alpha B, Lysosomal	promyelocyte	0.667221	1	0.128	0.483333	0
248500	Mannosidosis, Alpha B, Lysosomal	neutrophilic myeloblast	0.942063	1	0.101	0.483333	0
248500	Mannosidosis, Alpha B, Lysosomal	neutrophilic metamyelocyte	-0.446515	1	0.638	0.975	0
248500	Mannosidosis, Alpha B, Lysosomal	band form neutrophil	-0.554336	1	0.591	0.975	0
248500	Mannosidosis, Alpha B, Lysosomal	segmented neutrophil of bone marrow	0.254346	1	0.08	0.483333	0
249100	Familial Mediterranean Fever, Ar	proerythroblast	-0.61911	1	0.741	0.937	0
249100	Familial Mediterranean Fever, Ar	reticulocyte	-0.660103	1	0.487	0.937	0
249100	Familial Mediterranean Fever, Ar	erythroblast	-0.660103	1	0.563	0.937	0
249100	Familial Mediterranean Fever, Ar	plasma cell	-0.310445	1	0.668	0.937	0
249100	Familial Mediterranean Fever, Ar	early pro-B cell	-0.660103	1	0.937	0.937	0
249100	Familial Mediterranean Fever, Ar	precursor B cell	-0.649213	1	0.93	0.937	0
249100	Familial Mediterranean Fever, Ar	immature B cell	-0.618097	1	0.918	0.937	0
249100	Familial Mediterranean Fever, Ar	basophil	-0.660103	1	0.916	0.937	0
249100	Familial Mediterranean Fever, Ar	myelocyte	0.72114	1	0.108	0.432	0
249100	Familial Mediterranean Fever, Ar	hematopoietic stem cell	-0.391051	1	0.93	0.937	0
249100	Familial Mediterranean Fever, Ar	macrophage	-0.465193	1	0.89	0.937	0
249100	Familial Mediterranean Fever, Ar	T cell	-0.660103	1	0.878	0.937	0
249100	Familial Mediterranean Fever, Ar	mature B cell	-0.660103	1	0.904	0.937	0
249100	Familial Mediterranean Fever, Ar	monocyte	1.66308	1	0.03	0.2	0
249100	Familial Mediterranean Fever, Ar	conventional dendritic cell	0.644081	1	0.19	0.633333	0
249100	Familial Mediterranean Fever, Ar	promyelocyte	1.82878	1	0.005	0.05	1
249100	Familial Mediterranean Fever, Ar	neutrophilic myeloblast	2.61588	1	0	0	1
249100	Familial Mediterranean Fever, Ar	neutrophilic metamyelocyte	0.54155	1	0.047	0.235	0
[truncated: 3,142 more rows]

## Sheet: Lung
Supplementary File 6B. Diseases and their PrEDiCT scores across cell types in lung.
Disease\Phenotypic series accession (OMIM)	Disease name (OMIM)	Cell type name	PrEDiCT score	Number of orthologous causal genes	P value	FDR	Cell type likely-affected by disease (1=Yes, 0=No)
102700	Severe Combined Immunodeficiency, Autosomal Recessive, T Cell-negative,b Cell-negative, Nk Cell-negative, Due To Adenosine Deaminase Deficiency	ciliated epithelial cell	-0.352925	1	0.707	0.733	0
102700	Severe Combined Immunodeficiency, Autosomal Recessive, T Cell-negative,b Cell-negative, Nk Cell-negative, Due To Adenosine Deaminase Deficiency	pulmonary ionocyte; type II pneumocyte	-0.352925	1	0.564	0.733	0
102700	Severe Combined Immunodeficiency, Autosomal Recessive, T Cell-negative,b Cell-negative, Nk Cell-negative, Due To Adenosine Deaminase Deficiency	pulmonary artery endothelial cell	3.42531	1	0.002	0.028	1
102700	Severe Combined Immunodeficiency, Autosomal Recessive, T Cell-negative,b Cell-negative, Nk Cell-negative, Due To Adenosine Deaminase Deficiency	capillary endothelial cell	-0.352925	1	0.672	0.733	0
102700	Severe Combined Immunodeficiency, Autosomal Recessive, T Cell-negative,b Cell-negative, Nk Cell-negative, Due To Adenosine Deaminase Deficiency	pericyte cell	-0.352925	1	0.688	0.733	0
102700	Severe Combined Immunodeficiency, Autosomal Recessive, T Cell-negative,b Cell-negative, Nk Cell-negative, Due To Adenosine Deaminase Deficiency	B cell	-0.0774654	1	0.392	0.733	0
102700	Severe Combined Immunodeficiency, Autosomal Recessive, T Cell-negative,b Cell-negative, Nk Cell-negative, Due To Adenosine Deaminase Deficiency	neutrophil	-0.352925	1	0.511	0.733	0
102700	Severe Combined Immunodeficiency, Autosomal Recessive, T Cell-negative,b Cell-negative, Nk Cell-negative, Due To Adenosine Deaminase Deficiency	alveolar macrophage	-0.352925	1	0.658	0.733	0
102700	Severe Combined Immunodeficiency, Autosomal Recessive, T Cell-negative,b Cell-negative, Nk Cell-negative, Due To Adenosine Deaminase Deficiency	classical monocyte	-0.352925	1	0.606	0.733	0
102700	Severe Combined Immunodeficiency, Autosomal Recessive, T Cell-negative,b Cell-negative, Nk Cell-negative, Due To Adenosine Deaminase Deficiency	non-classical monocyte	-0.352925	1	0.592	0.733	0
102700	Severe Combined Immunodeficiency, Autosomal Recessive, T Cell-negative,b Cell-negative, Nk Cell-negative, Due To Adenosine Deaminase Deficiency	lymphocyte	0.216286	1	0.191	0.733	0
102700	Severe Combined Immunodeficiency, Autosomal Recessive, T Cell-negative,b Cell-negative, Nk Cell-negative, Due To Adenosine Deaminase Deficiency	myofibroblast cell	-0.352925	1	0.733	0.733	0
102700	Severe Combined Immunodeficiency, Autosomal Recessive, T Cell-negative,b Cell-negative, Nk Cell-negative, Due To Adenosine Deaminase Deficiency	fibroblast	-0.0983093	1	0.576	0.733	0
102700	Severe Combined Immunodeficiency, Autosomal Recessive, T Cell-negative,b Cell-negative, Nk Cell-negative, Due To Adenosine Deaminase Deficiency	fibroblast.1	-0.289496	1	0.665	0.733	0
PS122470	Cornelia de Lange syndrome	ciliated epithelial cell	-0.159208	1	0.608	0.9086	0
PS122470	Cornelia de Lange syndrome	pulmonary ionocyte; type II pneumocyte	-0.428742	1	0.649	0.9086	0
PS122470	Cornelia de Lange syndrome	pulmonary artery endothelial cell	-0.468563	1	0.86	0.999	0
PS122470	Cornelia de Lange syndrome	capillary endothelial cell	-0.844841	1	0.929	0.999	0
PS122470	Cornelia de Lange syndrome	pericyte cell	-2.48733	1	0.999	0.999	0
PS122470	Cornelia de Lange syndrome	B cell	1.82797	1	0.04	0.3612	0
PS122470	Cornelia de Lange syndrome	neutrophil	0.790367	1	0.091	0.3612	0
PS122470	Cornelia de Lange syndrome	alveolar macrophage	0.823237	1	0.129	0.3612	0
PS122470	Cornelia de Lange syndrome	classical monocyte	0.495124	1	0.094	0.3612	0
PS122470	Cornelia de Lange syndrome	non-classical monocyte	0.615252	1	0.107	0.3612	0
PS122470	Cornelia de Lange syndrome	lymphocyte	-0.0472141	1	0.475	0.83125	0
PS122470	Cornelia de Lange syndrome	myofibroblast cell	0.343306	1	0.248	0.578667	0
PS122470	Cornelia de Lange syndrome	fibroblast	0.0683008	1	0.314	0.628	0
PS122470	Cornelia de Lange syndrome	fibroblast.1	-0.527662	1	0.847	0.999	0
PS123700	Cutis laxa	ciliated epithelial cell	-0.50762	4	0.911	0.966	0
PS123700	Cutis laxa	pulmonary ionocyte; type II pneumocyte	-0.410127	4	0.751	0.966	0
PS123700	Cutis laxa	pulmonary artery endothelial cell	0.0461038	4	0.343	0.966	0
PS123700	Cutis laxa	capillary endothelial cell	-0.490714	4	0.94	0.966	0
PS123700	Cutis laxa	pericyte cell	-0.0519246	4	0.471	0.966	0
PS123700	Cutis laxa	B cell	-0.650587	4	0.874	0.966	0
PS123700	Cutis laxa	neutrophil	-0.548537	4	0.669	0.966	0
PS123700	Cutis laxa	alveolar macrophage	-0.582879	4	0.961	0.966	0
PS123700	Cutis laxa	classical monocyte	-0.583641	4	0.926	0.966	0
PS123700	Cutis laxa	non-classical monocyte	-0.579172	4	0.912	0.966	0
PS123700	Cutis laxa	lymphocyte	-0.615874	4	0.966	0.966	0
PS123700	Cutis laxa	myofibroblast cell	0.691878	4	0.036	0.168	0
PS123700	Cutis laxa	fibroblast	1.36698	4	0.003	0.021	1
PS123700	Cutis laxa	fibroblast.1	1.99718	4	0	0	1
PS127550	Dyskeratosis congenita	ciliated epithelial cell	0.538951	2	0.347	0.68425	0
PS127550	Dyskeratosis congenita	pulmonary ionocyte; type II pneumocyte	-0.610564	2	0.85	0.993	0
PS127550	Dyskeratosis congenita	pulmonary artery endothelial cell	0.701378	2	0.146	0.553	0
PS127550	Dyskeratosis congenita	capillary endothelial cell	0.731617	2	0.202	0.5656	0
PS127550	Dyskeratosis congenita	pericyte cell	1.34637	2	0.072	0.553	0
PS127550	Dyskeratosis congenita	B cell	0.3563	2	0.15	0.553	0
PS127550	Dyskeratosis congenita	neutrophil	-0.882444	2	0.802	0.993	0
PS127550	Dyskeratosis congenita	alveolar macrophage	0.0704609	2	0.337	0.68425	0
PS127550	Dyskeratosis congenita	classical monocyte	-0.737129	2	0.947	0.993	0
PS127550	Dyskeratosis congenita	non-classical monocyte	-0.132327	2	0.391	0.68425	0
PS127550	Dyskeratosis congenita	lymphocyte	0.441795	2	0.158	0.553	0
PS127550	Dyskeratosis congenita	myofibroblast cell	-0.767842	2	0.969	0.993	0
PS127550	Dyskeratosis congenita	fibroblast	-0.19093	2	0.691	0.993	0
PS127550	Dyskeratosis congenita	fibroblast.1	-0.865641	2	0.993	0.993	0
PS130000	Ehlers-Danlos syndrome	ciliated epithelial cell	-0.443984	4	0.907	0.913	0
PS130000	Ehlers-Danlos syndrome	pulmonary ionocyte; type II pneumocyte	-0.531198	4	0.85	0.913	0
PS130000	Ehlers-Danlos syndrome	pulmonary artery endothelial cell	-0.185119	4	0.759	0.913	0
PS130000	Ehlers-Danlos syndrome	capillary endothelial cell	0.400301	4	0.182	0.588	0
PS130000	Ehlers-Danlos syndrome	pericyte cell	0.285486	4	0.21	0.588	0
PS130000	Ehlers-Danlos syndrome	B cell	-0.668177	4	0.913	0.913	0
PS130000	Ehlers-Danlos syndrome	neutrophil	-0.44273	4	0.568	0.913	0
PS130000	Ehlers-Danlos syndrome	alveolar macrophage	-0.4168	4	0.868	0.913	0
PS130000	Ehlers-Danlos syndrome	classical monocyte	-0.426544	4	0.802	0.913	0
PS130000	Ehlers-Danlos syndrome	non-classical monocyte	-0.520647	4	0.851	0.913	0
PS130000	Ehlers-Danlos syndrome	lymphocyte	-0.471939	4	0.878	0.913	0
PS130000	Ehlers-Danlos syndrome	myofibroblast cell	0.570586	4	0.071	0.331333	0
PS130000	Ehlers-Danlos syndrome	fibroblast	0.758526	4	0.026	0.182	0
PS130000	Ehlers-Danlos syndrome	fibroblast.1	1.70672	4	0	0	1
135150	Birt-hogg-dube Syndrome	ciliated epithelial cell	0.39218	1	0.295	0.697667	0
135150	Birt-hogg-dube Syndrome	pulmonary ionocyte; type II pneumocyte	1.33787	1	0.056	0.392	0
135150	Birt-hogg-dube Syndrome	pulmonary artery endothelial cell	0.289149	1	0.28	0.697667	0
135150	Birt-hogg-dube Syndrome	capillary endothelial cell	-0.133552	1	0.565	0.784	0
135150	Birt-hogg-dube Syndrome	pericyte cell	-0.257177	1	0.616	0.784	0
135150	Birt-hogg-dube Syndrome	B cell	-0.374685	1	0.548	0.784	0
135150	Birt-hogg-dube Syndrome	neutrophil	-1.54736	1	0.928	0.987	0
135150	Birt-hogg-dube Syndrome	alveolar macrophage	2.41129	1	0.03	0.392	0
135150	Birt-hogg-dube Syndrome	classical monocyte	-0.917098	1	0.938	0.987	0
135150	Birt-hogg-dube Syndrome	non-classical monocyte	-0.0665909	1	0.414	0.784	0
135150	Birt-hogg-dube Syndrome	lymphocyte	-0.154136	1	0.472	0.784	0
135150	Birt-hogg-dube Syndrome	myofibroblast cell	-1.2737	1	0.987	0.987	0
135150	Birt-hogg-dube Syndrome	fibroblast	0.196717	1	0.261	0.697667	0
135150	Birt-hogg-dube Syndrome	fibroblast.1	0.0970885	1	0.299	0.697667	0
PS135900	Coffin-Siris syndrome	ciliated epithelial cell	1.39871	1	0.186	0.434	0
PS135900	Coffin-Siris syndrome	pulmonary ionocyte; type II pneumocyte	0.112621	1	0.185	0.434	0
PS135900	Coffin-Siris syndrome	pulmonary artery endothelial cell	-0.531364	1	0.891	0.99	0
PS135900	Coffin-Siris syndrome	capillary endothelial cell	-1.39213	1	0.986	0.99	0
PS135900	Coffin-Siris syndrome	pericyte cell	0.497507	1	0.231	0.462	0
PS135900	Coffin-Siris syndrome	B cell	-1.72762	1	0.99	0.99	0
PS135900	Coffin-Siris syndrome	neutrophil	1.25188	1	0.073	0.434	0
PS135900	Coffin-Siris syndrome	alveolar macrophage	0.739017	1	0.144	0.434	0
PS135900	Coffin-Siris syndrome	classical monocyte	-0.480522	1	0.737	0.99	0
PS135900	Coffin-Siris syndrome	non-classical monocyte	-1.20568	1	0.979	0.99	0
PS135900	Coffin-Siris syndrome	lymphocyte	-0.0121562	1	0.43	0.7525	0
PS135900	Coffin-Siris syndrome	myofibroblast cell	-0.326844	1	0.69	0.99	0
PS135900	Coffin-Siris syndrome	fibroblast	1.20436	1	0.06	0.434	0
PS135900	Coffin-Siris syndrome	fibroblast.1	0.472225	1	0.164	0.434	0
PS156200	Mental retardation, autosomal dominant	ciliated epithelial cell	1.39871	1	0.186	0.434	0
PS156200	Mental retardation, autosomal dominant	pulmonary ionocyte; type II pneumocyte	0.112621	1	0.172	0.434	0
PS156200	Mental retardation, autosomal dominant	pulmonary artery endothelial cell	-0.531364	1	0.906	0.988	0
PS156200	Mental retardation, autosomal dominant	capillary endothelial cell	-1.39213	1	0.985	0.988	0
PS156200	Mental retardation, autosomal dominant	pericyte cell	0.497507	1	0.267	0.534	0
PS156200	Mental retardation, autosomal dominant	B cell	-1.72762	1	0.988	0.988	0
PS156200	Mental retardation, autosomal dominant	neutrophil	1.25188	1	0.074	0.434	0
PS156200	Mental retardation, autosomal dominant	alveolar macrophage	0.739017	1	0.139	0.434	0
PS156200	Mental retardation, autosomal dominant	classical monocyte	-0.480522	1	0.722	0.988	0
PS156200	Mental retardation, autosomal dominant	non-classical monocyte	-1.20568	1	0.976	0.988	0
PS156200	Mental retardation, autosomal dominant	lymphocyte	-0.0121562	1	0.439	0.76825	0
PS156200	Mental retardation, autosomal dominant	myofibroblast cell	-0.326844	1	0.695	0.988	0
PS156200	Mental retardation, autosomal dominant	fibroblast	1.20436	1	0.067	0.434	0
PS156200	Mental retardation, autosomal dominant	fibroblast.1	0.472225	1	0.178	0.434	0
137940	Hypotrichosis-lymphedema-telangiectasia-renal Defect Syndrome	ciliated epithelial cell	-0.392003	1	0.72	0.797	0
137940	Hypotrichosis-lymphedema-telangiectasia-renal Defect Syndrome	pulmonary ionocyte; type II pneumocyte	-0.392003	1	0.613	0.797	0
137940	Hypotrichosis-lymphedema-telangiectasia-renal Defect Syndrome	pulmonary artery endothelial cell	1.51599	1	0.065	0.455	0
137940	Hypotrichosis-lymphedema-telangiectasia-renal Defect Syndrome	capillary endothelial cell	2.99812	1	0.021	0.294	0
137940	Hypotrichosis-lymphedema-telangiectasia-renal Defect Syndrome	pericyte cell	-0.392003	1	0.692	0.797	0
137940	Hypotrichosis-lymphedema-telangiectasia-renal Defect Syndrome	B cell	-0.392003	1	0.547	0.797	0
137940	Hypotrichosis-lymphedema-telangiectasia-renal Defect Syndrome	neutrophil	-0.262331	1	0.407	0.797	0
137940	Hypotrichosis-lymphedema-telangiectasia-renal Defect Syndrome	alveolar macrophage	-0.368751	1	0.677	0.797	0
137940	Hypotrichosis-lymphedema-telangiectasia-renal Defect Syndrome	classical monocyte	-0.373595	1	0.636	0.797	0
137940	Hypotrichosis-lymphedema-telangiectasia-renal Defect Syndrome	non-classical monocyte	-0.377266	1	0.591	0.797	0
137940	Hypotrichosis-lymphedema-telangiectasia-renal Defect Syndrome	lymphocyte	-0.392003	1	0.677	0.797	0
137940	Hypotrichosis-lymphedema-telangiectasia-renal Defect Syndrome	myofibroblast cell	-0.392003	1	0.749	0.797	0
137940	Hypotrichosis-lymphedema-telangiectasia-renal Defect Syndrome	fibroblast	-0.388155	1	0.797	0.797	0
137940	Hypotrichosis-lymphedema-telangiectasia-renal Defect Syndrome	fibroblast.1	-0.392003	1	0.776	0.797	0
PS300000	Opitz GBBB syndrome	ciliated epithelial cell	0.87774	1	0.235	0.818	0
PS300000	Opitz GBBB syndrome	pulmonary ionocyte; type II pneumocyte	-0.134946	1	0.402	0.818	0
PS300000	Opitz GBBB syndrome	pulmonary artery endothelial cell	-0.235175	1	0.664	0.818	0
PS300000	Opitz GBBB syndrome	capillary endothelial cell	-0.364973	1	0.729	0.818	0
PS300000	Opitz GBBB syndrome	pericyte cell	-0.081853	1	0.51	0.818	0
PS300000	Opitz GBBB syndrome	B cell	-0.53514	1	0.692	0.818	0
PS300000	Opitz GBBB syndrome	neutrophil	-0.346051	1	0.485	0.818	0
PS300000	Opitz GBBB syndrome	alveolar macrophage	-0.513544	1	0.816	0.818	0
PS300000	Opitz GBBB syndrome	classical monocyte	-0.330624	1	0.558	0.818	0
PS300000	Opitz GBBB syndrome	non-classical monocyte	-0.633296	1	0.818	0.818	0
PS300000	Opitz GBBB syndrome	lymphocyte	-0.408814	1	0.691	0.818	0
PS300000	Opitz GBBB syndrome	myofibroblast cell	-0.344481	1	0.683	0.818	0
PS300000	Opitz GBBB syndrome	fibroblast	3.24246	1	0.003	0.042	1
PS300000	Opitz GBBB syndrome	fibroblast.1	-0.191301	1	0.598	0.818	0
146510	Pallister-hall Syndrome 1	ciliated epithelial cell	0.76926	1	0.27	0.894	0
146510	Pallister-hall Syndrome 1	pulmonary ionocyte; type II pneumocyte	-0.242857	1	0.473	0.894	0
146510	Pallister-hall Syndrome 1	pulmonary artery endothelial cell	-0.577027	1	0.894	0.894	0
146510	Pallister-hall Syndrome 1	capillary endothelial cell	-0.577027	1	0.856	0.894	0
146510	Pallister-hall Syndrome 1	pericyte cell	-0.577027	1	0.795	0.894	0
146510	Pallister-hall Syndrome 1	B cell	-0.577027	1	0.726	0.894	0
146510	Pallister-hall Syndrome 1	neutrophil	-0.577027	1	0.639	0.894	0
146510	Pallister-hall Syndrome 1	alveolar macrophage	-0.577027	1	0.848	0.894	0
146510	Pallister-hall Syndrome 1	classical monocyte	-0.577027	1	0.784	0.894	0
146510	Pallister-hall Syndrome 1	non-classical monocyte	-0.577027	1	0.732	0.894	0
146510	Pallister-hall Syndrome 1	lymphocyte	-0.577027	1	0.833	0.894	0
146510	Pallister-hall Syndrome 1	myofibroblast cell	1.67158	1	0.048	0.336	0
146510	Pallister-hall Syndrome 1	fibroblast	0.479627	1	0.192	0.894	0
146510	Pallister-hall Syndrome 1	fibroblast.1	2.51563	1	0.017	0.238	0
PS147060	Hyper-IgE recurrent infection syndrome	ciliated epithelial cell	-0.0747076	4	0.581	0.996	0
PS147060	Hyper-IgE recurrent infection syndrome	pulmonary ionocyte; type II pneumocyte	-0.605686	4	0.892	0.996	0
PS147060	Hyper-IgE recurrent infection syndrome	pulmonary artery endothelial cell	-0.660505	4	0.996	0.996	0
PS147060	Hyper-IgE recurrent infection syndrome	capillary endothelial cell	-0.532483	4	0.958	0.996	0
PS147060	Hyper-IgE recurrent infection syndrome	pericyte cell	-0.713856	4	0.951	0.996	0
PS147060	Hyper-IgE recurrent infection syndrome	B cell	-0.758543	4	0.935	0.996	0
PS147060	Hyper-IgE recurrent infection syndrome	neutrophil	-0.512291	4	0.621	0.996	0
PS147060	Hyper-IgE recurrent infection syndrome	alveolar macrophage	0.476999	4	0.091	0.424667	0
PS147060	Hyper-IgE recurrent infection syndrome	classical monocyte	-0.0134091	4	0.21	0.588	0
PS147060	Hyper-IgE recurrent infection syndrome	non-classical monocyte	1.66673	4	0	0	1
PS147060	Hyper-IgE recurrent infection syndrome	lymphocyte	-0.369138	4	0.783	0.996	0
PS147060	Hyper-IgE recurrent infection syndrome	myofibroblast cell	-0.549183	4	0.957	0.996	0
PS147060	Hyper-IgE recurrent infection syndrome	fibroblast	0.579406	4	0.039	0.273	0
PS147060	Hyper-IgE recurrent infection syndrome	fibroblast.1	0.079928	4	0.202	0.588	0
150550	Periodic Fever, Immunodeficiency, And Thrombocytopenia Syndrome	ciliated epithelial cell	-0.571055	1	0.835	0.986	0
150550	Periodic Fever, Immunodeficiency, And Thrombocytopenia Syndrome	pulmonary ionocyte; type II pneumocyte	-0.93302	1	0.888	0.986	0
150550	Periodic Fever, Immunodeficiency, And Thrombocytopenia Syndrome	pulmonary artery endothelial cell	-0.0530294	1	0.555	0.936444	0
150550	Periodic Fever, Immunodeficiency, And Thrombocytopenia Syndrome	capillary endothelial cell	0.00523799	1	0.336	0.672	0
150550	Periodic Fever, Immunodeficiency, And Thrombocytopenia Syndrome	pericyte cell	0.0487196	1	0.316	0.672	0
150550	Periodic Fever, Immunodeficiency, And Thrombocytopenia Syndrome	B cell	-0.436442	1	0.602	0.936444	0
150550	Periodic Fever, Immunodeficiency, And Thrombocytopenia Syndrome	neutrophil	0.0296212	1	0.162	0.4536	0
150550	Periodic Fever, Immunodeficiency, And Thrombocytopenia Syndrome	alveolar macrophage	2.52927	1	0.022	0.308	0
150550	Periodic Fever, Immunodeficiency, And Thrombocytopenia Syndrome	classical monocyte	0.413225	1	0.094	0.329	0
150550	Periodic Fever, Immunodeficiency, And Thrombocytopenia Syndrome	non-classical monocyte	1.11101	1	0.058	0.329	0
150550	Periodic Fever, Immunodeficiency, And Thrombocytopenia Syndrome	lymphocyte	0.872946	1	0.094	0.329	0
150550	Periodic Fever, Immunodeficiency, And Thrombocytopenia Syndrome	myofibroblast cell	-1.0248	1	0.969	0.986	0
150550	Periodic Fever, Immunodeficiency, And Thrombocytopenia Syndrome	fibroblast	-0.929274	1	0.986	0.986	0
150550	Periodic Fever, Immunodeficiency, And Thrombocytopenia Syndrome	fibroblast.1	-1.06241	1	0.985	0.986	0
PS151623	Li-Fraumeni syndrome	ciliated epithelial cell	-1.26945	1	0.979	0.988	0
PS151623	Li-Fraumeni syndrome	pulmonary ionocyte; type II pneumocyte	-1.56184	1	0.988	0.988	0
PS151623	Li-Fraumeni syndrome	pulmonary artery endothelial cell	1.49365	1	0.07	0.361667	0
PS151623	Li-Fraumeni syndrome	capillary endothelial cell	1.3496	1	0.135	0.361667	0
PS151623	Li-Fraumeni syndrome	pericyte cell	0.518921	1	0.259	0.455	0
PS151623	Li-Fraumeni syndrome	B cell	0.546474	1	0.116	0.361667	0
PS151623	Li-Fraumeni syndrome	neutrophil	-1.505	1	0.91	0.988	0
PS151623	Li-Fraumeni syndrome	alveolar macrophage	-0.366129	1	0.682	0.9548	0
PS151623	Li-Fraumeni syndrome	classical monocyte	0.0954313	1	0.155	0.361667	0
PS151623	Li-Fraumeni syndrome	non-classical monocyte	-0.309285	1	0.552	0.858667	0
PS151623	Li-Fraumeni syndrome	lymphocyte	0.607791	1	0.118	0.361667	0
PS151623	Li-Fraumeni syndrome	myofibroblast cell	0.899279	1	0.136	0.361667	0
PS151623	Li-Fraumeni syndrome	fibroblast	0.26125	1	0.26	0.455	0
PS151623	Li-Fraumeni syndrome	fibroblast.1	-0.760689	1	0.925	0.988	0
152700	Systemic Lupus Erythematosus	ciliated epithelial cell	-0.629693	4	0.963	0.986	0
152700	Systemic Lupus Erythematosus	pulmonary ionocyte; type II pneumocyte	-0.631075	4	0.906	0.986	0
152700	Systemic Lupus Erythematosus	pulmonary artery endothelial cell	-0.541818	4	0.984	0.986	0
152700	Systemic Lupus Erythematosus	capillary endothelial cell	-0.376543	4	0.847	0.986	0
152700	Systemic Lupus Erythematosus	pericyte cell	-0.58926	4	0.922	0.986	0
152700	Systemic Lupus Erythematosus	B cell	-0.0344454	4	0.225	0.63	0
152700	Systemic Lupus Erythematosus	neutrophil	0.230595	4	0.063	0.294	0
152700	Systemic Lupus Erythematosus	alveolar macrophage	0.470702	4	0.088	0.308	0
152700	Systemic Lupus Erythematosus	classical monocyte	2.43105	4	0	0	1
152700	Systemic Lupus Erythematosus	non-classical monocyte	1.00317	4	0.003	0.021	1
152700	Systemic Lupus Erythematosus	lymphocyte	-0.0899491	4	0.382	0.891333	0
152700	Systemic Lupus Erythematosus	myofibroblast cell	-0.623808	4	0.971	0.986	0
152700	Systemic Lupus Erythematosus	fibroblast	-0.538407	4	0.985	0.986	0
152700	Systemic Lupus Erythematosus	fibroblast.1	-0.608086	4	0.986	0.986	0
154700	Marfan Syndrome	ciliated epithelial cell	-0.472665	1	0.757	0.855	0
154700	Marfan Syndrome	pulmonary ionocyte; type II pneumocyte	-0.488033	1	0.717	0.855	0
154700	Marfan Syndrome	pulmonary artery endothelial cell	-0.484299	1	0.855	0.855	0
154700	Marfan Syndrome	capillary endothelial cell	-0.479866	1	0.821	0.855	0
154700	Marfan Syndrome	pericyte cell	0.630229	1	0.245	0.855	0
154700	Marfan Syndrome	B cell	-0.508455	1	0.664	0.855	0
154700	Marfan Syndrome	neutrophil	-0.465196	1	0.559	0.855	0
154700	Marfan Syndrome	alveolar macrophage	-0.52756	1	0.805	0.855	0
154700	Marfan Syndrome	classical monocyte	-0.521051	1	0.729	0.855	0
154700	Marfan Syndrome	non-classical monocyte	-0.505413	1	0.72	0.855	0
154700	Marfan Syndrome	lymphocyte	-0.466722	1	0.75	0.855	0
154700	Marfan Syndrome	myofibroblast cell	0.288794	1	0.223	0.855	0
154700	Marfan Syndrome	fibroblast	0.976882	1	0.094	0.658	0
154700	Marfan Syndrome	fibroblast.1	3.02336	1	0.012	0.168	0
158310	Mucoepithelial Dysplasia, Hereditary	ciliated epithelial cell	1.3993	1	0.2	0.735	0
158310	Mucoepithelial Dysplasia, Hereditary	pulmonary ionocyte; type II pneumocyte	2.15068	1	0.025	0.35	0
158310	Mucoepithelial Dysplasia, Hereditary	pulmonary artery endothelial cell	-0.314634	1	0.731	0.93	0
158310	Mucoepithelial Dysplasia, Hereditary	capillary endothelial cell	0.708659	1	0.21	0.735	0
158310	Mucoepithelial Dysplasia, Hereditary	pericyte cell	1.36808	1	0.152	0.735	0
158310	Mucoepithelial Dysplasia, Hereditary	B cell	-1.14958	1	0.93	0.93	0
158310	Mucoepithelial Dysplasia, Hereditary	neutrophil	-0.891077	1	0.756	0.93	0
158310	Mucoepithelial Dysplasia, Hereditary	alveolar macrophage	-0.406275	1	0.718	0.93	0
158310	Mucoepithelial Dysplasia, Hereditary	classical monocyte	-0.509154	1	0.754	0.93	0
158310	Mucoepithelial Dysplasia, Hereditary	non-classical monocyte	-0.54931	1	0.724	0.93	0
158310	Mucoepithelial Dysplasia, Hereditary	lymphocyte	-0.802509	1	0.919	0.93	0
158310	Mucoepithelial Dysplasia, Hereditary	myofibroblast cell	-0.543669	1	0.815	0.93	0
158310	Mucoepithelial Dysplasia, Hereditary	fibroblast	-0.0622562	1	0.543	0.93	0
158310	Mucoepithelial Dysplasia, Hereditary	fibroblast.1	-0.398266	1	0.782	0.93	0
159950	Spinal Muscular Atrophy With Progressive Myoclonic Epilepsy	ciliated epithelial cell	-1.30724	1	0.988	0.999	0
159950	Spinal Muscular Atrophy With Progressive Myoclonic Epilepsy	pulmonary ionocyte; type II pneumocyte	-0.451564	1	0.671	0.854	0
159950	Spinal Muscular Atrophy With Progressive Myoclonic Epilepsy	pulmonary artery endothelial cell	0.269098	1	0.282	0.658	0
159950	Spinal Muscular Atrophy With Progressive Myoclonic Epilepsy	capillary endothelial cell	0.547742	1	0.218	0.6524	0
159950	Spinal Muscular Atrophy With Progressive Myoclonic Epilepsy	pericyte cell	0.906264	1	0.19	0.6524	0
159950	Spinal Muscular Atrophy With Progressive Myoclonic Epilepsy	B cell	-1.31959	1	0.958	0.999	0
159950	Spinal Muscular Atrophy With Progressive Myoclonic Epilepsy	neutrophil	-0.171108	1	0.417	0.7896	0
159950	Spinal Muscular Atrophy With Progressive Myoclonic Epilepsy	alveolar macrophage	1.77344	1	0.068	0.476	0
159950	Spinal Muscular Atrophy With Progressive Myoclonic Epilepsy	classical monocyte	1.52019	1	0.021	0.294	0
159950	Spinal Muscular Atrophy With Progressive Myoclonic Epilepsy	non-classical monocyte	-0.257269	1	0.479	0.7896	0
159950	Spinal Muscular Atrophy With Progressive Myoclonic Epilepsy	lymphocyte	-1.56998	1	0.999	0.999	0
159950	Spinal Muscular Atrophy With Progressive Myoclonic Epilepsy	myofibroblast cell	0.31931	1	0.233	0.6524	0
159950	Spinal Muscular Atrophy With Progressive Myoclonic Epilepsy	fibroblast	-0.140274	1	0.564	0.7896	0
159950	Spinal Muscular Atrophy With Progressive Myoclonic Epilepsy	fibroblast.1	-0.119027	1	0.562	0.7896	0
170100	Prolidase Deficiency	ciliated epithelial cell	2.25141	1	0.12	0.464333	0
170100	Prolidase Deficiency	pulmonary ionocyte; type II pneumocyte	-1.19458	1	0.952	0.992	0
170100	Prolidase Deficiency	pulmonary artery endothelial cell	-0.192404	1	0.61	0.9016	0
170100	Prolidase Deficiency	capillary endothelial cell	-0.376624	1	0.734	0.934182	0
170100	Prolidase Deficiency	pericyte cell	-0.104329	1	0.543	0.9016	0
170100	Prolidase Deficiency	B cell	0.0186827	1	0.199	0.464333	0
170100	Prolidase Deficiency	neutrophil	-1.6647	1	0.947	0.992	0
170100	Prolidase Deficiency	alveolar macrophage	0.535303	1	0.174	0.464333	0
170100	Prolidase Deficiency	classical monocyte	0.927763	1	0.056	0.464333	0
170100	Prolidase Deficiency	non-classical monocyte	0.696701	1	0.104	0.464333	0
170100	Prolidase Deficiency	lymphocyte	-0.153619	1	0.504	0.9016	0
170100	Prolidase Deficiency	myofibroblast cell	0.662412	1	0.188	0.464333	0
170100	Prolidase Deficiency	fibroblast	-0.223779	1	0.644	0.9016	0
170100	Prolidase Deficiency	fibroblast.1	-1.18223	1	0.992	0.992	0
173600	Pneumothorax, Primary Spontaneous	ciliated epithelial cell	0.39218	1	0.314	0.732667	0
173600	Pneumothorax, Primary Spontaneous	pulmonary ionocyte; type II pneumocyte	1.33787	1	0.056	0.392	0
173600	Pneumothorax, Primary Spontaneous	pulmonary artery endothelial cell	0.289149	1	0.287	0.732667	0
173600	Pneumothorax, Primary Spontaneous	capillary endothelial cell	-0.133552	1	0.593	0.754727	0
173600	Pneumothorax, Primary Spontaneous	pericyte cell	-0.257177	1	0.556	0.754727	0
173600	Pneumothorax, Primary Spontaneous	B cell	-0.374685	1	0.567	0.754727	0
173600	Pneumothorax, Primary Spontaneous	neutrophil	-1.54736	1	0.924	0.984	0
173600	Pneumothorax, Primary Spontaneous	alveolar macrophage	2.41129	1	0.03	0.392	0
173600	Pneumothorax, Primary Spontaneous	classical monocyte	-0.917098	1	0.954	0.984	0
173600	Pneumothorax, Primary Spontaneous	non-classical monocyte	-0.0665909	1	0.4	0.754727	0
173600	Pneumothorax, Primary Spontaneous	lymphocyte	-0.154136	1	0.499	0.754727	0
173600	Pneumothorax, Primary Spontaneous	myofibroblast cell	-1.2737	1	0.984	0.984	0
173600	Pneumothorax, Primary Spontaneous	fibroblast	0.196717	1	0.288	0.732667	0
173600	Pneumothorax, Primary Spontaneous	fibroblast.1	0.0970885	1	0.281	0.732667	0
175050	Juvenile Polyposis/hereditary Hemorrhagic Telangiectasia Syndrome	ciliated epithelial cell	2.16032	1	0.114	0.3948	0
175050	Juvenile Polyposis/hereditary Hemorrhagic Telangiectasia Syndrome	pulmonary ionocyte; type II pneumocyte	0.848197	1	0.068	0.3948	0
175050	Juvenile Polyposis/hereditary Hemorrhagic Telangiectasia Syndrome	pulmonary artery endothelial cell	-0.886503	1	0.972	0.994	0
175050	Juvenile Polyposis/hereditary Hemorrhagic Telangiectasia Syndrome	capillary endothelial cell	-0.458102	1	0.807	0.994	0
175050	Juvenile Polyposis/hereditary Hemorrhagic Telangiectasia Syndrome	pericyte cell	0.737777	1	0.21	0.424	0
175050	Juvenile Polyposis/hereditary Hemorrhagic Telangiectasia Syndrome	B cell	-1.74431	1	0.994	0.994	0
175050	Juvenile Polyposis/hereditary Hemorrhagic Telangiectasia Syndrome	neutrophil	-0.569697	1	0.635	0.994	0
175050	Juvenile Polyposis/hereditary Hemorrhagic Telangiectasia Syndrome	alveolar macrophage	-0.896486	1	0.948	0.994	0
175050	Juvenile Polyposis/hereditary Hemorrhagic Telangiectasia Syndrome	classical monocyte	0.161854	1	0.141	0.3948	0
175050	Juvenile Polyposis/hereditary Hemorrhagic Telangiectasia Syndrome	non-classical monocyte	0.711646	1	0.101	0.3948	0
175050	Juvenile Polyposis/hereditary Hemorrhagic Telangiectasia Syndrome	lymphocyte	0.822616	1	0.099	0.3948	0
175050	Juvenile Polyposis/hereditary Hemorrhagic Telangiectasia Syndrome	myofibroblast cell	-0.465265	1	0.781	0.994	0
175050	Juvenile Polyposis/hereditary Hemorrhagic Telangiectasia Syndrome	fibroblast	-0.651357	1	0.912	0.994	0
175050	Juvenile Polyposis/hereditary Hemorrhagic Telangiectasia Syndrome	fibroblast.1	0.229307	1	0.212	0.424	0
176270	Prader-willi Syndrome	ciliated epithelial cell	-0.419912	1	0.713	0.842	0
176270	Prader-willi Syndrome	pulmonary ionocyte; type II pneumocyte	-0.565065	1	0.73	0.842	0
176270	Prader-willi Syndrome	pulmonary artery endothelial cell	-0.372076	1	0.784	0.842	0
176270	Prader-willi Syndrome	capillary endothelial cell	-0.324735	1	0.692	0.842	0
176270	Prader-willi Syndrome	pericyte cell	2.75385	1	0.042	0.385	0
176270	Prader-willi Syndrome	B cell	-0.589218	1	0.721	0.842	0
176270	Prader-willi Syndrome	neutrophil	-0.589218	1	0.623	0.842	0
176270	Prader-willi Syndrome	alveolar macrophage	-0.589218	1	0.842	0.842	0
176270	Prader-willi Syndrome	classical monocyte	-0.544495	1	0.767	0.842	0
176270	Prader-willi Syndrome	non-classical monocyte	-0.541449	1	0.702	0.842	0
176270	Prader-willi Syndrome	lymphocyte	-0.538448	1	0.803	0.842	0
176270	Prader-willi Syndrome	myofibroblast cell	0.675409	1	0.188	0.842	0
176270	Prader-willi Syndrome	fibroblast	0.134099	1	0.286	0.842	0
176270	Prader-willi Syndrome	fibroblast.1	1.51048	1	0.055	0.385	0
PS178600	Pulmonary hypertension, primary	ciliated epithelial cell	-0.290194	1	0.644	0.849	0
PS178600	Pulmonary hypertension, primary	pulmonary ionocyte; type II pneumocyte	-0.606785	1	0.741	0.849	0
PS178600	Pulmonary hypertension, primary	pulmonary artery endothelial cell	2.33243	1	0.017	0.238	0
PS178600	Pulmonary hypertension, primary	capillary endothelial cell	2.2236	1	0.051	0.357	0
PS178600	Pulmonary hypertension, primary	pericyte cell	-0.666768	1	0.822	0.849	0
PS178600	Pulmonary hypertension, primary	B cell	-0.666768	1	0.771	0.849	0
PS178600	Pulmonary hypertension, primary	neutrophil	0.274842	1	0.115	0.536667	0
PS178600	Pulmonary hypertension, primary	alveolar macrophage	-0.237587	1	0.533	0.849	0
PS178600	Pulmonary hypertension, primary	classical monocyte	-0.485754	1	0.696	0.849	0
PS178600	Pulmonary hypertension, primary	non-classical monocyte	-0.59429	1	0.771	0.849	0
PS178600	Pulmonary hypertension, primary	lymphocyte	-0.60068	1	0.849	0.849	0
PS178600	Pulmonary hypertension, primary	myofibroblast cell	-0.145738	1	0.596	0.849	0
PS178600	Pulmonary hypertension, primary	fibroblast	-0.152361	1	0.607	0.849	0
PS178600	Pulmonary hypertension, primary	fibroblast.1	-0.383947	1	0.754	0.849	0
PS180849	Rubinstein-Taybi syndrome	ciliated epithelial cell	0.562951	1	0.298	0.5215	0
PS180849	Rubinstein-Taybi syndrome	pulmonary ionocyte; type II pneumocyte	0.342719	1	0.146	0.498	0
PS180849	Rubinstein-Taybi syndrome	pulmonary artery endothelial cell	0.582548	1	0.215	0.498	0
PS180849	Rubinstein-Taybi syndrome	capillary endothelial cell	-0.0359393	1	0.567	0.7938	0
PS180849	Rubinstein-Taybi syndrome	pericyte cell	1.48363	1	0.119	0.498	0
PS180849	Rubinstein-Taybi syndrome	B cell	-1.54317	1	0.985	0.995	0
PS180849	Rubinstein-Taybi syndrome	neutrophil	-1.60326	1	0.94	0.995	0
PS180849	Rubinstein-Taybi syndrome	alveolar macrophage	0.269753	1	0.249	0.498	0
PS180849	Rubinstein-Taybi syndrome	classical monocyte	-1.30322	1	0.995	0.995	0
PS180849	Rubinstein-Taybi syndrome	non-classical monocyte	-0.155088	1	0.423	0.658	0
PS180849	Rubinstein-Taybi syndrome	lymphocyte	-0.975045	1	0.97	0.995	0
PS180849	Rubinstein-Taybi syndrome	myofibroblast cell	0.50879	1	0.194	0.498	0
PS180849	Rubinstein-Taybi syndrome	fibroblast	0.528037	1	0.184	0.498	0
PS180849	Rubinstein-Taybi syndrome	fibroblast.1	1.3373	1	0.055	0.498	0
184260	Osteochondrodysplasia	ciliated epithelial cell	0.669821	1	0.286	0.572	0
184260	Osteochondrodysplasia	pulmonary ionocyte; type II pneumocyte	-0.167458	1	0.419	0.73325	0
184260	Osteochondrodysplasia	pulmonary artery endothelial cell	0.791111	1	0.179	0.572	0
184260	Osteochondrodysplasia	capillary endothelial cell	1.85358	1	0.072	0.508667	0
184260	Osteochondrodysplasia	pericyte cell	-0.911972	1	0.888	0.985	0
184260	Osteochondrodysplasia	B cell	-1.21038	1	0.947	0.985	0
184260	Osteochondrodysplasia	neutrophil	-1.62083	1	0.949	0.985	0
184260	Osteochondrodysplasia	alveolar macrophage	-1.10596	1	0.985	0.985	0
184260	Osteochondrodysplasia	classical monocyte	-0.380571	1	0.627	0.8778	0
184260	Osteochondrodysplasia	non-classical monocyte	-0.29025	1	0.53	0.824444	0
184260	Osteochondrodysplasia	lymphocyte	0.835487	1	0.109	0.508667	0
184260	Osteochondrodysplasia	myofibroblast cell	0.316658	1	0.252	0.572	0
184260	Osteochondrodysplasia	fibroblast	1.13106	1	0.081	0.508667	0
184260	Osteochondrodysplasia	fibroblast.1	0.089694	1	0.251	0.572	0
PS187300	Telangiectasia, hereditary hemorrhagic	ciliated epithelial cell	-0.49714	2	0.857	0.892	0
PS187300	Telangiectasia, hereditary hemorrhagic	pulmonary ionocyte; type II pneumocyte	-0.49968	2	0.749	0.892	0
PS187300	Telangiectasia, hereditary hemorrhagic	pulmonary artery endothelial cell	1.94236	2	0.007	0.049	1
PS187300	Telangiectasia, hereditary hemorrhagic	capillary endothelial cell	2.6172	2	0.001	0.014	1
PS187300	Telangiectasia, hereditary hemorrhagic	pericyte cell	0.164114	2	0.417	0.892	0
PS187300	Telangiectasia, hereditary hemorrhagic	B cell	-0.495229	2	0.701	0.892	0
PS187300	Telangiectasia, hereditary hemorrhagic	neutrophil	-0.309664	2	0.44	0.892	0
PS187300	Telangiectasia, hereditary hemorrhagic	alveolar macrophage	-0.426237	2	0.831	0.892	0
PS187300	Telangiectasia, hereditary hemorrhagic	classical monocyte	-0.429583	2	0.741	0.892	0
PS187300	Telangiectasia, hereditary hemorrhagic	non-classical monocyte	-0.444681	2	0.729	0.892	0
PS187300	Telangiectasia, hereditary hemorrhagic	lymphocyte	-0.491883	2	0.826	0.892	0
PS187300	Telangiectasia, hereditary hemorrhagic	myofibroblast cell	-0.373708	2	0.796	0.892	0
PS187300	Telangiectasia, hereditary hemorrhagic	fibroblast	-0.391946	2	0.892	0.892	0
PS187300	Telangiectasia, hereditary hemorrhagic	fibroblast.1	-0.363928	2	0.816	0.892	0
PS191100	Tuberous sclerosis	ciliated epithelial cell	-0.588678	3	0.914	0.948	0
PS191100	Tuberous sclerosis	pulmonary ionocyte; type II pneumocyte	-0.0808294	3	0.339	0.898333	0
PS191100	Tuberous sclerosis	pulmonary artery endothelial cell	0.681083	3	0.083	0.581	0
PS191100	Tuberous sclerosis	capillary endothelial cell	-0.26876	3	0.674	0.948	0
PS191100	Tuberous sclerosis	pericyte cell	2.31686	3	0.01	0.14	0
PS191100	Tuberous sclerosis	B cell	-0.894333	3	0.948	0.948	0
PS191100	Tuberous sclerosis	neutrophil	-0.26876	3	0.385	0.898333	0
PS191100	Tuberous sclerosis	alveolar macrophage	-0.26876	3	0.608	0.948	0
PS191100	Tuberous sclerosis	classical monocyte	-0.521261	3	0.827	0.948	0
PS191100	Tuberous sclerosis	non-classical monocyte	-0.733398	3	0.93	0.948	0
PS191100	Tuberous sclerosis	lymphocyte	-0.547269	3	0.883	0.948	0
PS191100	Tuberous sclerosis	myofibroblast cell	0.00213533	3	0.265	0.898333	0
PS191100	Tuberous sclerosis	fibroblast	0.164256	3	0.188	0.877333	0
PS191100	Tuberous sclerosis	fibroblast.1	-0.249233	3	0.653	0.948	0
PS191830	Renal hypodysplasia/aplasia	ciliated epithelial cell	-0.244365	1	0.639	0.717	0
PS191830	Renal hypodysplasia/aplasia	pulmonary ionocyte; type II pneumocyte	-0.108722	1	0.416	0.717	0
PS191830	Renal hypodysplasia/aplasia	pulmonary artery endothelial cell	-0.305335	1	0.714	0.717	0
PS191830	Renal hypodysplasia/aplasia	capillary endothelial cell	-0.324818	1	0.689	0.717	0
PS191830	Renal hypodysplasia/aplasia	pericyte cell	-0.258861	1	0.576	0.717	0
PS191830	Renal hypodysplasia/aplasia	B cell	-0.363849	1	0.554	0.717	0
PS191830	Renal hypodysplasia/aplasia	neutrophil	-0.244216	1	0.404	0.717	0
PS191830	Renal hypodysplasia/aplasia	alveolar macrophage	-0.356385	1	0.717	0.717	0
PS191830	Renal hypodysplasia/aplasia	classical monocyte	-0.310481	1	0.561	0.717	0
PS191830	Renal hypodysplasia/aplasia	non-classical monocyte	-0.254501	1	0.486	0.717	0
PS191830	Renal hypodysplasia/aplasia	lymphocyte	-0.352152	1	0.649	0.717	0
PS191830	Renal hypodysplasia/aplasia	myofibroblast cell	-0.209791	1	0.595	0.717	0
PS191830	Renal hypodysplasia/aplasia	fibroblast	3.46374	1	0	0	1
PS191830	Renal hypodysplasia/aplasia	fibroblast.1	-0.130268	1	0.519	0.717	0
192430	Velocardiofacial Syndrome	ciliated epithelial cell	3.45748	1	0.02	0.28	0
192430	Velocardiofacial Syndrome	pulmonary ionocyte; type II pneumocyte	0.0614579	1	0.179	0.74	0
192430	Velocardiofacial Syndrome	pulmonary artery endothelial cell	-0.305122	1	0.74	0.74	0
192430	Velocardiofacial Syndrome	capillary endothelial cell	-0.305122	1	0.685	0.74	0
192430	Velocardiofacial Syndrome	pericyte cell	-0.305122	1	0.636	0.74	0
192430	Velocardiofacial Syndrome	B cell	-0.305122	1	0.521	0.74	0
192430	Velocardiofacial Syndrome	neutrophil	-0.305122	1	0.449	0.74	0
192430	Velocardiofacial Syndrome	alveolar macrophage	-0.305122	1	0.628	0.74	0
192430	Velocardiofacial Syndrome	classical monocyte	-0.305122	1	0.534	0.74	0
192430	Velocardiofacial Syndrome	non-classical monocyte	-0.305122	1	0.582	0.74	0
192430	Velocardiofacial Syndrome	lymphocyte	-0.305122	1	0.571	0.74	0
192430	Velocardiofacial Syndrome	myofibroblast cell	-0.305122	1	0.68	0.74	0
192430	Velocardiofacial Syndrome	fibroblast	-0.262771	1	0.694	0.74	0
192430	Velocardiofacial Syndrome	fibroblast.1	-0.204948	1	0.607	0.74	0
193300	Von Hippel-lindau Syndrome	ciliated epithelial cell	0.590586	1	0.29	0.935	0
193300	Von Hippel-lindau Syndrome	pulmonary ionocyte; type II pneumocyte	0.50076	1	0.125	0.583333	0
193300	Von Hippel-lindau Syndrome	pulmonary artery endothelial cell	1.17717	1	0.096	0.583333	0
193300	Von Hippel-lindau Syndrome	capillary endothelial cell	2.85667	1	0.019	0.266	0
193300	Von Hippel-lindau Syndrome	pericyte cell	-0.521568	1	0.747	0.935	0
193300	Von Hippel-lindau Syndrome	B cell	-0.584074	1	0.691	0.935	0
193300	Von Hippel-lindau Syndrome	neutrophil	-0.331166	1	0.448	0.935	0
193300	Von Hippel-lindau Syndrome	alveolar macrophage	-0.568133	1	0.824	0.935	0
193300	Von Hippel-lindau Syndrome	classical monocyte	-0.143935	1	0.407	0.935	0
193300	Von Hippel-lindau Syndrome	non-classical monocyte	-0.517444	1	0.723	0.935	0
193300	Von Hippel-lindau Syndrome	lymphocyte	-0.659874	1	0.874	0.935	0
193300	Von Hippel-lindau Syndrome	myofibroblast cell	-0.624218	1	0.876	0.935	0
193300	Von Hippel-lindau Syndrome	fibroblast	-0.636939	1	0.935	0.935	0
193300	Von Hippel-lindau Syndrome	fibroblast.1	-0.537841	1	0.831	0.935	0
193670	Whim Syndrome	ciliated epithelial cell	-0.690579	1	0.86	0.951	0
193670	Whim Syndrome	pulmonary ionocyte; type II pneumocyte	-0.684518	1	0.807	0.951	0
193670	Whim Syndrome	pulmonary artery endothelial cell	-0.5642	1	0.917	0.951	0
193670	Whim Syndrome	capillary endothelial cell	-0.656208	1	0.887	0.951	0
193670	Whim Syndrome	pericyte cell	1.69135	1	0.122	0.569333	0
193670	Whim Syndrome	B cell	0.19773	1	0.173	0.6055	0
193670	Whim Syndrome	neutrophil	2.48796	1	0.029	0.406	0
193670	Whim Syndrome	alveolar macrophage	-0.123133	1	0.513	0.951	0
193670	Whim Syndrome	classical monocyte	-0.254285	1	0.472	0.951	0
193670	Whim Syndrome	non-classical monocyte	0.850948	1	0.101	0.569333	0
193670	Whim Syndrome	lymphocyte	-0.239847	1	0.516	0.951	0
193670	Whim Syndrome	myofibroblast cell	-0.649397	1	0.867	0.951	0
193670	Whim Syndrome	fibroblast	-0.67886	1	0.951	0.951	0
193670	Whim Syndrome	fibroblast.1	-0.686951	1	0.894	0.951	0
PS203300	Hermansky-Pudlak syndrome	ciliated epithelial cell	0.522303	3	0.203	0.947333	0
PS203300	Hermansky-Pudlak syndrome	pulmonary ionocyte; type II pneumocyte	-0.445999	3	0.727	0.95	0
PS203300	Hermansky-Pudlak syndrome	pulmonary artery endothelial cell	-0.469681	3	0.95	0.95	0
PS203300	Hermansky-Pudlak syndrome	capillary endothelial cell	-0.379281	3	0.795	0.95	0
PS203300	Hermansky-Pudlak syndrome	pericyte cell	-0.608281	3	0.879	0.95	0
PS203300	Hermansky-Pudlak syndrome	B cell	-0.860467	3	0.931	0.95	0
PS203300	Hermansky-Pudlak syndrome	neutrophil	-1.17447	3	0.925	0.95	0
PS203300	Hermansky-Pudlak syndrome	alveolar macrophage	1.76239	3	0.01	0.07	1
PS203300	Hermansky-Pudlak syndrome	classical monocyte	0.898292	3	0.008	0.07	0
PS203300	Hermansky-Pudlak syndrome	non-classical monocyte	-0.557491	3	0.848	0.95	0
PS203300	Hermansky-Pudlak syndrome	lymphocyte	-0.231104	3	0.532	0.95	0
PS203300	Hermansky-Pudlak syndrome	myofibroblast cell	-0.0805828	3	0.546	0.95	0
PS203300	Hermansky-Pudlak syndrome	fibroblast	-0.196577	3	0.659	0.95	0
PS203300	Hermansky-Pudlak syndrome	fibroblast.1	-0.212831	3	0.681	0.95	0
PS208540	Renal-hepatic-pancreatic dysplasia	ciliated epithelial cell	2.63784	1	0.098	0.4816	0
PS208540	Renal-hepatic-pancreatic dysplasia	pulmonary ionocyte; type II pneumocyte	-0.433194	1	0.658	0.947	0
PS208540	Renal-hepatic-pancreatic dysplasia	pulmonary artery endothelial cell	-0.713	1	0.947	0.947	0
PS208540	Renal-hepatic-pancreatic dysplasia	capillary endothelial cell	-0.713	1	0.906	0.947	0
PS208540	Renal-hepatic-pancreatic dysplasia	pericyte cell	1.05755	1	0.17	0.4816	0
PS208540	Renal-hepatic-pancreatic dysplasia	B cell	0.188939	1	0.162	0.4816	0
PS208540	Renal-hepatic-pancreatic dysplasia	neutrophil	-0.713	1	0.697	0.947	0
PS208540	Renal-hepatic-pancreatic dysplasia	alveolar macrophage	-0.578068	1	0.848	0.947	0
PS208540	Renal-hepatic-pancreatic dysplasia	classical monocyte	-0.513883	1	0.733	0.947	0
PS208540	Renal-hepatic-pancreatic dysplasia	non-classical monocyte	-0.713	1	0.844	0.947	0
PS208540	Renal-hepatic-pancreatic dysplasia	lymphocyte	-0.386137	1	0.691	0.947	0
PS208540	Renal-hepatic-pancreatic dysplasia	myofibroblast cell	-0.713	1	0.91	0.947	0
PS208540	Renal-hepatic-pancreatic dysplasia	fibroblast	0.527925	1	0.172	0.4816	0
PS208540	Renal-hepatic-pancreatic dysplasia	fibroblast.1	1.06403	1	0.081	0.4816	0
208900	Ataxia-telangiectasia	ciliated epithelial cell	-0.0404134	1	0.57	0.917778	0
208900	Ataxia-telangiectasia	pulmonary ionocyte; type II pneumocyte	-0.0579125	1	0.409	0.894	0
208900	Ataxia-telangiectasia	pulmonary artery endothelial cell	-1.03733	1	0.987	0.987	0
208900	Ataxia-telangiectasia	capillary endothelial cell	-1.1649	1	0.975	0.987	0
208900	Ataxia-telangiectasia	pericyte cell	0.249245	1	0.283	0.7924	0
208900	Ataxia-telangiectasia	B cell	-0.40483	1	0.59	0.917778	0
208900	Ataxia-telangiectasia	neutrophil	-1.1649	1	0.821	0.987	0
208900	Ataxia-telangiectasia	alveolar macrophage	-0.492511	1	0.779	0.987	0
208900	Ataxia-telangiectasia	classical monocyte	-0.947796	1	0.958	0.987	0
208900	Ataxia-telangiectasia	non-classical monocyte	-0.21313	1	0.447	0.894	0
208900	Ataxia-telangiectasia	lymphocyte	1.38744	1	0.064	0.373333	0
208900	Ataxia-telangiectasia	myofibroblast cell	2.01194	1	0.035	0.373333	0
208900	Ataxia-telangiectasia	fibroblast	0.761869	1	0.116	0.406	0
208900	Ataxia-telangiectasia	fibroblast.1	1.11324	1	0.08	0.373333	0
PS300755	Immunodeficiency (Select Examples)	ciliated epithelial cell	-0.516588	39	0.999	0.999	0
PS300755	Immunodeficiency (Select Examples)	pulmonary ionocyte; type II pneumocyte	-0.4329	39	0.951	0.999	0
PS300755	Immunodeficiency (Select Examples)	pulmonary artery endothelial cell	-0.350034	39	0.999	0.999	0
PS300755	Immunodeficiency (Select Examples)	capillary endothelial cell	-0.348006	39	0.994	0.999	0
PS300755	Immunodeficiency (Select Examples)	pericyte cell	-0.408145	39	0.989	0.999	0
PS300755	Immunodeficiency (Select Examples)	B cell	-0.104573	39	0.131	0.4585	0
PS300755	Immunodeficiency (Select Examples)	neutrophil	-0.312405	39	0.332	0.9296	0
PS300755	Immunodeficiency (Select Examples)	alveolar macrophage	-0.234494	39	0.792	0.999	0
PS300755	Immunodeficiency (Select Examples)	classical monocyte	0.0384636	39	0	0	0
PS300755	Immunodeficiency (Select Examples)	non-classical monocyte	-0.0132661	39	0.128	0.4585	0
PS300755	Immunodeficiency (Select Examples)	lymphocyte	1.28688	39	0	0	1
PS300755	Immunodeficiency (Select Examples)	myofibroblast cell	-0.451714	39	0.999	0.999	0
PS300755	Immunodeficiency (Select Examples)	fibroblast	-0.41057	39	0.999	0.999	0
PS300755	Immunodeficiency (Select Examples)	fibroblast.1	-0.41057	39	0.999	0.999	0
PS211400	Bronchiectasis	ciliated epithelial cell	-0.267261	3	0.674	0.785	0
PS211400	Bronchiectasis	pulmonary ionocyte; type II pneumocyte	3.47415	3	0	0	1
PS211400	Bronchiectasis	pulmonary artery endothelial cell	-0.27067	3	0.785	0.785	0
PS211400	Bronchiectasis	capillary endothelial cell	-0.27067	3	0.718	0.785	0
PS211400	Bronchiectasis	pericyte cell	-0.27067	3	0.644	0.785	0
PS211400	Bronchiectasis	B cell	-0.27067	3	0.453	0.785	0
PS211400	Bronchiectasis	neutrophil	-0.267261	3	0.386	0.785	0
PS211400	Bronchiectasis	alveolar macrophage	-0.27067	3	0.658	0.785	0
PS211400	Bronchiectasis	classical monocyte	-0.27067	3	0.497	0.785	0
PS211400	Bronchiectasis	non-classical monocyte	-0.267261	3	0.492	0.785	0
PS211400	Bronchiectasis	lymphocyte	-0.27067	3	0.578	0.785	0
PS211400	Bronchiectasis	myofibroblast cell	-0.27067	3	0.696	0.785	0
PS211400	Bronchiectasis	fibroblast	-0.267261	3	0.775	0.785	0
PS211400	Bronchiectasis	fibroblast.1	-0.27067	3	0.7	0.785	0
PS211530	Brown-Vialetto-Van Laere syndrome	ciliated epithelial cell	1.87465	1	0.12	0.56	0
PS211530	Brown-Vialetto-Van Laere syndrome	pulmonary ionocyte; type II pneumocyte	1.22268	1	0.049	0.343	0
PS211530	Brown-Vialetto-Van Laere syndrome	pulmonary artery endothelial cell	-0.239355	1	0.65	0.902	0
PS211530	Brown-Vialetto-Van Laere syndrome	capillary endothelial cell	-0.58559	1	0.853	0.902	0
PS211530	Brown-Vialetto-Van Laere syndrome	pericyte cell	-0.58559	1	0.811	0.902	0
PS211530	Brown-Vialetto-Van Laere syndrome	B cell	-0.58559	1	0.733	0.902	0
PS211530	Brown-Vialetto-Van Laere syndrome	neutrophil	-0.58559	1	0.618	0.902	0
PS211530	Brown-Vialetto-Van Laere syndrome	alveolar macrophage	2.27307	1	0.026	0.343	0
PS211530	Brown-Vialetto-Van Laere syndrome	classical monocyte	-0.55303	1	0.766	0.902	0
PS211530	Brown-Vialetto-Van Laere syndrome	non-classical monocyte	-0.485418	1	0.701	0.902	0
PS211530	Brown-Vialetto-Van Laere syndrome	lymphocyte	-0.289993	1	0.584	0.902	0
PS211530	Brown-Vialetto-Van Laere syndrome	myofibroblast cell	-0.58559	1	0.845	0.902	0
PS211530	Brown-Vialetto-Van Laere syndrome	fibroblast	-0.58559	1	0.902	0.902	0
PS211530	Brown-Vialetto-Van Laere syndrome	fibroblast.1	-0.28906	1	0.673	0.902	0
211980	Lung Cancer, Susceptibility To	ciliated epithelial cell	-0.314397	4	0.793	0.865	0
211980	Lung Cancer, Susceptibility To	pulmonary ionocyte; type II pneumocyte	-0.289497	4	0.589	0.865	0
211980	Lung Cancer, Susceptibility To	pulmonary artery endothelial cell	-0.289497	4	0.864	0.865	0
211980	Lung Cancer, Susceptibility To	capillary endothelial cell	-0.289497	4	0.79	0.865	0
211980	Lung Cancer, Susceptibility To	pericyte cell	-0.431545	4	0.865	0.865	0
211980	Lung Cancer, Susceptibility To	B cell	-0.289497	4	0.506	0.865	0
211980	Lung Cancer, Susceptibility To	neutrophil	-0.00731417	4	0.177	0.865	0
211980	Lung Cancer, Susceptibility To	alveolar macrophage	-0.289497	4	0.724	0.865	0
211980	Lung Cancer, Susceptibility To	classical monocyte	-0.282593	4	0.574	0.865	0
211980	Lung Cancer, Susceptibility To	non-classical monocyte	-0.289497	4	0.583	0.865	0
211980	Lung Cancer, Susceptibility To	lymphocyte	0.382968	4	0.06	0.84	0
211980	Lung Cancer, Susceptibility To	myofibroblast cell	-0.289497	4	0.786	0.865	0
211980	Lung Cancer, Susceptibility To	fibroblast	-0.269758	4	0.826	0.865	0
211980	Lung Cancer, Susceptibility To	fibroblast.1	-0.289497	4	0.801	0.865	0
219700	Cystic Fibrosis	ciliated epithelial cell	-0.651411	3	0.942	0.982	0
219700	Cystic Fibrosis	pulmonary ionocyte; type II pneumocyte	-0.661004	3	0.896	0.982	0
219700	Cystic Fibrosis	pulmonary artery endothelial cell	-0.267261	3	0.798	0.982	0
219700	Cystic Fibrosis	capillary endothelial cell	-0.267261	3	0.681	0.982	0
219700	Cystic Fibrosis	pericyte cell	-0.366753	3	0.744	0.982	0
219700	Cystic Fibrosis	B cell	-0.267261	3	0.429	0.982	0
219700	Cystic Fibrosis	neutrophil	-0.185668	3	0.348	0.982	0
219700	Cystic Fibrosis	alveolar macrophage	0.776192	3	0.056	0.261333	0
219700	Cystic Fibrosis	classical monocyte	2.03887	3	0	0	1
219700	Cystic Fibrosis	non-classical monocyte	0.737327	3	0.022	0.154	0
219700	Cystic Fibrosis	lymphocyte	-0.160506	3	0.472	0.982	0
219700	Cystic Fibrosis	myofibroblast cell	-0.650082	3	0.96	0.982	0
219700	Cystic Fibrosis	fibroblast	-0.61276	3	0.966	0.982	0
219700	Cystic Fibrosis	fibroblast.1	-0.658402	3	0.982	0.982	0
222700	Lysinuric Protein Intolerance	ciliated epithelial cell	2.58704	1	0.097	0.588	0
222700	Lysinuric Protein Intolerance	pulmonary ionocyte; type II pneumocyte	-0.490464	1	0.689	0.964	0
222700	Lysinuric Protein Intolerance	pulmonary artery endothelial cell	0.755745	1	0.168	0.588	0
222700	Lysinuric Protein Intolerance	capillary endothelial cell	0.280178	1	0.283	0.7924	0
222700	Lysinuric Protein Intolerance	pericyte cell	-0.877774	1	0.865	0.964	0
222700	Lysinuric Protein Intolerance	B cell	-0.411768	1	0.591	0.964	0
222700	Lysinuric Protein Intolerance	neutrophil	-0.877774	1	0.765	0.964	0
222700	Lysinuric Protein Intolerance	alveolar macrophage	0.762239	1	0.142	0.588	0
222700	Lysinuric Protein Intolerance	classical monocyte	1.11248	1	0.042	0.588	0
222700	Lysinuric Protein Intolerance	non-classical monocyte	-0.418471	1	0.635	0.964	0
222700	Lysinuric Protein Intolerance	lymphocyte	-0.787289	1	0.908	0.964	0
222700	Lysinuric Protein Intolerance	myofibroblast cell	-0.177288	1	0.583	0.964	0
222700	Lysinuric Protein Intolerance	fibroblast	-0.739939	1	0.964	0.964	0
222700	Lysinuric Protein Intolerance	fibroblast.1	-0.716917	1	0.935	0.964	0
224410	Dyssegmental Dysplasia, Silverman-handmaker Type	ciliated epithelial cell	-0.378045	1	0.722	0.853	0
224410	Dyssegmental Dysplasia, Silverman-handmaker Type	pulmonary ionocyte; type II pneumocyte	-0.0708315	1	0.409	0.853	0
224410	Dyssegmental Dysplasia, Silverman-handmaker Type	pulmonary artery endothelial cell	-0.421765	1	0.825	0.853	0
224410	Dyssegmental Dysplasia, Silverman-handmaker Type	capillary endothelial cell	-0.559372	1	0.853	0.853	0
224410	Dyssegmental Dysplasia, Silverman-handmaker Type	pericyte cell	2.12026	1	0.094	0.658	0
224410	Dyssegmental Dysplasia, Silverman-handmaker Type	B cell	-0.612808	1	0.726	0.853	0
224410	Dyssegmental Dysplasia, Silverman-handmaker Type	neutrophil	-0.497941	1	0.595	0.853	0
224410	Dyssegmental Dysplasia, Silverman-handmaker Type	alveolar macrophage	-0.612808	1	0.848	0.853	0
224410	Dyssegmental Dysplasia, Silverman-handmaker Type	classical monocyte	-0.578759	1	0.784	0.853	0
224410	Dyssegmental Dysplasia, Silverman-handmaker Type	non-classical monocyte	-0.612808	1	0.798	0.853	0
224410	Dyssegmental Dysplasia, Silverman-handmaker Type	lymphocyte	-0.599205	1	0.826	0.853	0
224410	Dyssegmental Dysplasia, Silverman-handmaker Type	myofibroblast cell	0.113647	1	0.278	0.853	0
224410	Dyssegmental Dysplasia, Silverman-handmaker Type	fibroblast	0.327825	1	0.219	0.853	0
224410	Dyssegmental Dysplasia, Silverman-handmaker Type	fibroblast.1	2.38261	1	0.023	0.322	0
226300	Complement Hyperactivation, Angiopathic Thrombosis, And Protein-losing Enteropathy	ciliated epithelial cell	2.01399	1	0.127	0.844	0
226300	Complement Hyperactivation, Angiopathic Thrombosis, And Protein-losing Enteropathy	pulmonary ionocyte; type II pneumocyte	-0.254231	1	0.466	0.844	0
226300	Complement Hyperactivation, Angiopathic Thrombosis, And Protein-losing Enteropathy	pulmonary artery endothelial cell	-0.453163	1	0.844	0.844	0
226300	Complement Hyperactivation, Angiopathic Thrombosis, And Protein-losing Enteropathy	capillary endothelial cell	-0.453562	1	0.761	0.844	0
226300	Complement Hyperactivation, Angiopathic Thrombosis, And Protein-losing Enteropathy	pericyte cell	-0.494068	1	0.751	0.844	0
226300	Complement Hyperactivation, Angiopathic Thrombosis, And Protein-losing Enteropathy	B cell	2.62548	1	0.017	0.238	0
226300	Complement Hyperactivation, Angiopathic Thrombosis, And Protein-losing Enteropathy	neutrophil	-0.494068	1	0.582	0.844	0
226300	Complement Hyperactivation, Angiopathic Thrombosis, And Protein-losing Enteropathy	alveolar macrophage	-0.471179	1	0.769	0.844	0
226300	Complement Hyperactivation, Angiopathic Thrombosis, And Protein-losing Enteropathy	classical monocyte	-0.494068	1	0.696	0.844	0
226300	Complement Hyperactivation, Angiopathic Thrombosis, And Protein-losing Enteropathy	non-classical monocyte	-0.445123	1	0.66	0.844	0
226300	Complement Hyperactivation, Angiopathic Thrombosis, And Protein-losing Enteropathy	lymphocyte	-0.219805	1	0.534	0.844	0
226300	Complement Hyperactivation, Angiopathic Thrombosis, And Protein-losing Enteropathy	myofibroblast cell	-0.494068	1	0.831	0.844	0
226300	Complement Hyperactivation, Angiopathic Thrombosis, And Protein-losing Enteropathy	fibroblast	-0.360731	1	0.749	0.844	0
226300	Complement Hyperactivation, Angiopathic Thrombosis, And Protein-losing Enteropathy	fibroblast.1	-0.00539705	1	0.495	0.844	0
230800	Gaucher Disease, Type I	ciliated epithelial cell	-0.556052	1	0.806	0.975	0
230800	Gaucher Disease, Type I	pulmonary ionocyte; type II pneumocyte	-0.954768	1	0.917	0.975	0
230800	Gaucher Disease, Type I	pulmonary artery endothelial cell	-0.267606	1	0.69	0.975	0
230800	Gaucher Disease, Type I	capillary endothelial cell	0.413533	1	0.28	0.732667	0
230800	Gaucher Disease, Type I	pericyte cell	-1.60272	1	0.975	0.975	0
230800	Gaucher Disease, Type I	B cell	-1.18875	1	0.941	0.975	0
230800	Gaucher Disease, Type I	neutrophil	1.09337	1	0.068	0.354667	0
230800	Gaucher Disease, Type I	alveolar macrophage	2.0171	1	0.047	0.354667	0
230800	Gaucher Disease, Type I	classical monocyte	-0.0685806	1	0.398	0.796	0
230800	Gaucher Disease, Type I	non-classical monocyte	-0.477777	1	0.692	0.975	0
230800	Gaucher Disease, Type I	lymphocyte	1.12176	1	0.076	0.354667	0
230800	Gaucher Disease, Type I	myofibroblast cell	0.0818489	1	0.314	0.732667	0
230800	Gaucher Disease, Type I	fibroblast	-0.404446	1	0.824	0.975	0
230800	Gaucher Disease, Type I	fibroblast.1	0.79309	1	0.114	0.399	0
230900	Gaucher Disease, Type Ii	ciliated epithelial cell	-0.556052	1	0.818	0.982	0
230900	Gaucher Disease, Type Ii	pulmonary ionocyte; type II pneumocyte	-0.954768	1	0.904	0.982	0
230900	Gaucher Disease, Type Ii	pulmonary artery endothelial cell	-0.267606	1	0.668	0.982	0
230900	Gaucher Disease, Type Ii	capillary endothelial cell	0.413533	1	0.26	0.714	0
230900	Gaucher Disease, Type Ii	pericyte cell	-1.60272	1	0.982	0.982	0
230900	Gaucher Disease, Type Ii	B cell	-1.18875	1	0.953	0.982	0
230900	Gaucher Disease, Type Ii	neutrophil	1.09337	1	0.091	0.406	0
230900	Gaucher Disease, Type Ii	alveolar macrophage	2.0171	1	0.059	0.406	0
230900	Gaucher Disease, Type Ii	classical monocyte	-0.0685806	1	0.42	0.84	0
230900	Gaucher Disease, Type Ii	non-classical monocyte	-0.477777	1	0.703	0.982	0
230900	Gaucher Disease, Type Ii	lymphocyte	1.12176	1	0.085	0.406	0
230900	Gaucher Disease, Type Ii	myofibroblast cell	0.0818489	1	0.306	0.714	0
230900	Gaucher Disease, Type Ii	fibroblast	-0.404446	1	0.802	0.982	0
230900	Gaucher Disease, Type Ii	fibroblast.1	0.79309	1	0.116	0.406	0
231680	Multiple Acyl-coa Dehydrogenase Deficiency	ciliated epithelial cell	1.10397	3	0.116	0.372	0
231680	Multiple Acyl-coa Dehydrogenase Deficiency	pulmonary ionocyte; type II pneumocyte	0.010155	3	0.084	0.372	0
231680	Multiple Acyl-coa Dehydrogenase Deficiency	pulmonary artery endothelial cell	0.371798	3	0.153	0.372	0
231680	Multiple Acyl-coa Dehydrogenase Deficiency	capillary endothelial cell	-1.10082	3	0.998	0.998	0
231680	Multiple Acyl-coa Dehydrogenase Deficiency	pericyte cell	0.435153	3	0.165	0.372	0
231680	Multiple Acyl-coa Dehydrogenase Deficiency	B cell	-0.84138	3	0.933	0.998	0
231680	Multiple Acyl-coa Dehydrogenase Deficiency	neutrophil	-1.42496	3	0.968	0.998	0
231680	Multiple Acyl-coa Dehydrogenase Deficiency	alveolar macrophage	1.3412	3	0.022	0.308	0
231680	Multiple Acyl-coa Dehydrogenase Deficiency	classical monocyte	-0.680136	3	0.948	0.998	0
231680	Multiple Acyl-coa Dehydrogenase Deficiency	non-classical monocyte	-0.113556	3	0.408	0.714	0
231680	Multiple Acyl-coa Dehydrogenase Deficiency	lymphocyte	-0.709759	3	0.956	0.998	0
231680	Multiple Acyl-coa Dehydrogenase Deficiency	myofibroblast cell	0.59385	3	0.091	0.372	0
231680	Multiple Acyl-coa Dehydrogenase Deficiency	fibroblast	0.167137	3	0.186	0.372	0
231680	Multiple Acyl-coa Dehydrogenase Deficiency	fibroblast.1	-0.388168	3	0.862	0.998	0
232300	Glycogen Storage Disease Ii	ciliated epithelial cell	-0.155617	1	0.602	0.983	0
232300	Glycogen Storage Disease Ii	pulmonary ionocyte; type II pneumocyte	0.102831	1	0.174	0.58	0
232300	Glycogen Storage Disease Ii	pulmonary artery endothelial cell	0.336582	1	0.29	0.58	0
232300	Glycogen Storage Disease Ii	capillary endothelial cell	-0.31246	1	0.709	0.983	0
232300	Glycogen Storage Disease Ii	pericyte cell	0.807515	1	0.226	0.58	0
232300	Glycogen Storage Disease Ii	B cell	-0.688823	1	0.772	0.983	0
232300	Glycogen Storage Disease Ii	neutrophil	-1.25204	1	0.863	0.983	0
232300	Glycogen Storage Disease Ii	alveolar macrophage	0.119858	1	0.275	0.58	0
232300	Glycogen Storage Disease Ii	classical monocyte	-0.79179	1	0.884	0.983	0
232300	Glycogen Storage Disease Ii	non-classical monocyte	-1.07869	1	0.949	0.983	0
232300	Glycogen Storage Disease Ii	lymphocyte	-1.16604	1	0.983	0.983	0
232300	Glycogen Storage Disease Ii	myofibroblast cell	0.419804	1	0.241	0.58	0
232300	Glycogen Storage Disease Ii	fibroblast	1.94273	1	0.028	0.357	0
232300	Glycogen Storage Disease Ii	fibroblast.1	1.71615	1	0.051	0.357	0
PS306400	Granulomatous disease, chronic	ciliated epithelial cell	-0.677567	5	0.976	0.995	0
PS306400	Granulomatous disease, chronic	pulmonary ionocyte; type II pneumocyte	-0.646663	5	0.933	0.995	0
PS306400	Granulomatous disease, chronic	pulmonary artery endothelial cell	-0.595019	5	0.994	0.995	0
PS306400	Granulomatous disease, chronic	capillary endothelial cell	-0.597964	5	0.966	0.995	0
PS306400	Granulomatous disease, chronic	pericyte cell	-0.656827	5	0.948	0.995	0
PS306400	Granulomatous disease, chronic	B cell	0.417614	5	0.022	0.0672	0
PS306400	Granulomatous disease, chronic	neutrophil	1.19566	5	0.005	0.0233333	1
PS306400	Granulomatous disease, chronic	alveolar macrophage	0.804111	5	0.024	0.0672	0
PS306400	Granulomatous disease, chronic	classical monocyte	1.22359	5	0	0	1
PS306400	Granulomatous disease, chronic	non-classical monocyte	1.78031	5	0	0	1
PS306400	Granulomatous disease, chronic	lymphocyte	-0.524775	5	0.93	0.995	0
PS306400	Granulomatous disease, chronic	myofibroblast cell	-0.6987	5	0.985	0.995	0
PS306400	Granulomatous disease, chronic	fibroblast	-0.643699	5	0.993	0.995	0
PS306400	Granulomatous disease, chronic	fibroblast.1	-0.709784	5	0.995	0.995	0
PS265450	Pulmonary venoocclusive disease	ciliated epithelial cell	-0.486036	2	0.868	0.917	0
PS265450	Pulmonary venoocclusive disease	pulmonary ionocyte; type II pneumocyte	0.584891	2	0.101	0.4305	0
PS265450	Pulmonary venoocclusive disease	pulmonary artery endothelial cell	0.825277	2	0.123	0.4305	0
PS265450	Pulmonary venoocclusive disease	capillary endothelial cell	1.06303	2	0.114	0.4305	0
PS265450	Pulmonary venoocclusive disease	pericyte cell	-0.674323	2	0.89	0.917	0
PS265450	Pulmonary venoocclusive disease	B cell	-0.343644	2	0.568	0.917	0
PS265450	Pulmonary venoocclusive disease	neutrophil	-0.203518	2	0.365	0.752	0
PS265450	Pulmonary venoocclusive disease	alveolar macrophage	1.12776	2	0.074	0.4305	0
PS265450	Pulmonary venoocclusive disease	classical monocyte	-0.111639	2	0.376	0.752	0
PS265450	Pulmonary venoocclusive disease	non-classical monocyte	-0.52943	2	0.792	0.917	0
PS265450	Pulmonary venoocclusive disease	lymphocyte	-0.57329	2	0.917	0.917	0
PS265450	Pulmonary venoocclusive disease	myofibroblast cell	-0.413809	2	0.817	0.917	0
PS265450	Pulmonary venoocclusive disease	fibroblast	0.223332	2	0.256	0.7168	0
PS265450	Pulmonary venoocclusive disease	fibroblast.1	-0.488603	2	0.886	0.917	0
PS235200	Hemochromatosis	ciliated epithelial cell	-0.352779	1	0.684	0.728	0
PS235200	Hemochromatosis	pulmonary ionocyte; type II pneumocyte	-0.318842	1	0.561	0.728	0
PS235200	Hemochromatosis	pulmonary artery endothelial cell	0.159952	1	0.319	0.728	0
PS235200	Hemochromatosis	capillary endothelial cell	-0.180708	1	0.564	0.728	0
PS235200	Hemochromatosis	pericyte cell	-0.41115	1	0.693	0.728	0
PS235200	Hemochromatosis	B cell	-0.41115	1	0.573	0.728	0
PS235200	Hemochromatosis	neutrophil	-0.41115	1	0.547	0.728	0
PS235200	Hemochromatosis	alveolar macrophage	-0.279607	1	0.604	0.728	0
PS235200	Hemochromatosis	classical monocyte	0.118848	1	0.168	0.728	0
PS235200	Hemochromatosis	non-classical monocyte	3.41571	1	0.001	0.014	1
PS235200	Hemochromatosis	lymphocyte	-0.406666	1	0.678	0.728	0
PS235200	Hemochromatosis	myofibroblast cell	-0.315936	1	0.682	0.728	0
PS235200	Hemochromatosis	fibroblast	-0.303124	1	0.728	0.728	0
PS235200	Hemochromatosis	fibroblast.1	-0.303398	1	0.716	0.728	0
PS607594	Immunodeficiency, common variable	ciliated epithelial cell	-0.27561	9	0.809	0.857	0
PS607594	Immunodeficiency, common variable	pulmonary ionocyte; type II pneumocyte	-0.276433	9	0.535	0.857	0
PS607594	Immunodeficiency, common variable	pulmonary artery endothelial cell	-0.256607	9	0.857	0.857	0
PS607594	Immunodeficiency, common variable	capillary endothelial cell	-0.272893	9	0.817	0.857	0
PS607594	Immunodeficiency, common variable	pericyte cell	-0.276433	9	0.727	0.857	0
PS607594	Immunodeficiency, common variable	B cell	3.24839	9	0	0	1
PS607594	Immunodeficiency, common variable	neutrophil	-0.396843	9	0.52	0.857	0
PS607594	Immunodeficiency, common variable	alveolar macrophage	-0.276433	9	0.75	0.857	0
PS607594	Immunodeficiency, common variable	classical monocyte	-0.251912	9	0.473	0.857	0
PS607594	Immunodeficiency, common variable	non-classical monocyte	-0.256767	9	0.456	0.857	0
PS607594	Immunodeficiency, common variable	lymphocyte	-0.270288	9	0.677	0.857	0
PS607594	Immunodeficiency, common variable	myofibroblast cell	-0.270288	9	0.798	0.857	0
PS607594	Immunodeficiency, common variable	fibroblast	-0.262843	9	0.856	0.857	0
PS607594	Immunodeficiency, common variable	fibroblast.1	-0.276433	9	0.849	0.857	0
PS242860	Immunodeficiency-centromeric instability-facial anomalies	ciliated epithelial cell	-0.687004	1	0.869	0.954	0
PS242860	Immunodeficiency-centromeric instability-facial anomalies	pulmonary ionocyte; type II pneumocyte	-0.603476	1	0.793	0.954	0
PS242860	Immunodeficiency-centromeric instability-facial anomalies	pulmonary artery endothelial cell	0.348385	1	0.266	0.7448	0
PS242860	Immunodeficiency-centromeric instability-facial anomalies	capillary endothelial cell	-0.33924	1	0.702	0.954	0
PS242860	Immunodeficiency-centromeric instability-facial anomalies	pericyte cell	-1.10976	1	0.922	0.954	0
PS242860	Immunodeficiency-centromeric instability-facial anomalies	B cell	-0.524632	1	0.688	0.954	0
PS242860	Immunodeficiency-centromeric instability-facial anomalies	neutrophil	2.64335	1	0.027	0.308	0
PS242860	Immunodeficiency-centromeric instability-facial anomalies	alveolar macrophage	-0.640489	1	0.865	0.954	0
PS242860	Immunodeficiency-centromeric instability-facial anomalies	classical monocyte	-0.322452	1	0.571	0.954	0
PS242860	Immunodeficiency-centromeric instability-facial anomalies	non-classical monocyte	-0.282261	1	0.524	0.954	0
PS242860	Immunodeficiency-centromeric instability-facial anomalies	lymphocyte	1.27903	1	0.044	0.308	0
PS242860	Immunodeficiency-centromeric instability-facial anomalies	myofibroblast cell	0.576769	1	0.178	0.665	0
PS242860	Immunodeficiency-centromeric instability-facial anomalies	fibroblast	0.468699	1	0.19	0.665	0
PS242860	Immunodeficiency-centromeric instability-facial anomalies	fibroblast.1	-0.806926	1	0.954	0.954	0
PS244400	Primary ciliary dyskinesia	ciliated epithelial cell	3.46847	19	0	0	1
PS244400	Primary ciliary dyskinesia	pulmonary ionocyte; type II pneumocyte	-0.271813	19	0.514	0.966	0
PS244400	Primary ciliary dyskinesia	pulmonary artery endothelial cell	-0.275072	19	0.966	0.966	0
PS244400	Primary ciliary dyskinesia	capillary endothelial cell	-0.275072	19	0.899	0.966	0
PS244400	Primary ciliary dyskinesia	pericyte cell	-0.276875	19	0.827	0.966	0
PS244400	Primary ciliary dyskinesia	B cell	-0.278926	19	0.467	0.966	0
PS244400	Primary ciliary dyskinesia	neutrophil	-0.283658	19	0.283	0.966	0
PS244400	Primary ciliary dyskinesia	alveolar macrophage	-0.273502	19	0.826	0.966	0
PS244400	Primary ciliary dyskinesia	classical monocyte	-0.262029	19	0.468	0.966	0
PS244400	Primary ciliary dyskinesia	non-classical monocyte	-0.283658	19	0.559	0.966	0
PS244400	Primary ciliary dyskinesia	lymphocyte	-0.283658	19	0.771	0.966	0
PS244400	Primary ciliary dyskinesia	myofibroblast cell	-0.267261	19	0.865	0.966	0
PS244400	Primary ciliary dyskinesia	fibroblast	-0.26427	19	0.945	0.966	0
PS244400	Primary ciliary dyskinesia	fibroblast.1	-0.267261	19	0.897	0.966	0
245150	Keutel Syndrome	ciliated epithelial cell	-0.515184	1	0.786	0.845	0
245150	Keutel Syndrome	pulmonary ionocyte; type II pneumocyte	-0.463483	1	0.648	0.845	0
245150	Keutel Syndrome	pulmonary artery endothelial cell	-0.437735	1	0.822	0.845	0
245150	Keutel Syndrome	capillary endothelial cell	-0.533793	1	0.845	0.845	0
245150	Keutel Syndrome	pericyte cell	-0.51959	1	0.755	0.845	0
245150	Keutel Syndrome	B cell	-0.520456	1	0.676	0.845	0
245150	Keutel Syndrome	neutrophil	-0.457779	1	0.548	0.845	0
245150	Keutel Syndrome	alveolar macrophage	-0.529929	1	0.805	0.845	0
245150	Keutel Syndrome	classical monocyte	-0.511474	1	0.745	0.845	0
245150	Keutel Syndrome	non-classical monocyte	-0.514342	1	0.716	0.845	0
245150	Keutel Syndrome	lymphocyte	-0.502788	1	0.746	0.845	0
245150	Keutel Syndrome	myofibroblast cell	1.93691	1	0.045	0.261333	0
245150	Keutel Syndrome	fibroblast	2.01961	1	0.025	0.261333	0
245150	Keutel Syndrome	fibroblast.1	1.55003	1	0.056	0.261333	0
PS249000	Meckel syndrome	ciliated epithelial cell	3.40428	1	0.032	0.448	0
PS249000	Meckel syndrome	pulmonary ionocyte; type II pneumocyte	-0.342526	1	0.558	0.798	0
PS249000	Meckel syndrome	pulmonary artery endothelial cell	-0.310372	1	0.734	0.798	0
PS249000	Meckel syndrome	capillary endothelial cell	-0.443051	1	0.798	0.798	0
PS249000	Meckel syndrome	pericyte cell	-0.443051	1	0.72	0.798	0
PS249000	Meckel syndrome	B cell	-0.443051	1	0.616	0.798	0
PS249000	Meckel syndrome	neutrophil	-0.443051	1	0.563	0.798	0
PS249000	Meckel syndrome	alveolar macrophage	-0.443051	1	0.756	0.798	0
PS249000	Meckel syndrome	classical monocyte	-0.0254629	1	0.38	0.798	0
PS249000	Meckel syndrome	non-classical monocyte	0.0552987	1	0.212	0.798	0
PS249000	Meckel syndrome	lymphocyte	-0.37508	1	0.658	0.798	0
PS249000	Meckel syndrome	myofibroblast cell	0.134451	1	0.302	0.798	0
PS249000	Meckel syndrome	fibroblast	-0.176796	1	0.588	0.798	0
PS249000	Meckel syndrome	fibroblast.1	-0.148536	1	0.579	0.798	0
251230	Microcephaly-micromelia Syndrome	ciliated epithelial cell	-0.511704	1	0.783	0.916462	0
251230	Microcephaly-micromelia Syndrome	pulmonary ionocyte; type II pneumocyte	-0.7638	1	0.844	0.916462	0
251230	Microcephaly-micromelia Syndrome	pulmonary artery endothelial cell	0.00279494	1	0.342	0.916462	0
251230	Microcephaly-micromelia Syndrome	capillary endothelial cell	2.64421	1	0.027	0.217	0
251230	Microcephaly-micromelia Syndrome	pericyte cell	-0.86131	1	0.851	0.916462	0
251230	Microcephaly-micromelia Syndrome	B cell	0.0460429	1	0.189	0.6615	0
251230	Microcephaly-micromelia Syndrome	neutrophil	-0.86131	1	0.718	0.916462	0
251230	Microcephaly-micromelia Syndrome	alveolar macrophage	-0.134568	1	0.542	0.916462	0
251230	Microcephaly-micromelia Syndrome	classical monocyte	-0.16523	1	0.434	0.916462	0
251230	Microcephaly-micromelia Syndrome	non-classical monocyte	1.51079	1	0.031	0.217	0
251230	Microcephaly-micromelia Syndrome	lymphocyte	0.692919	1	0.136	0.634667	0
251230	Microcephaly-micromelia Syndrome	myofibroblast cell	-0.47778	1	0.789	0.916462	0
251230	Microcephaly-micromelia Syndrome	fibroblast	-0.639166	1	0.928	0.928	0
251230	Microcephaly-micromelia Syndrome	fibroblast.1	-0.481894	1	0.836	0.916462	0
251260	Nijmegen Breakage Syndrome	ciliated epithelial cell	0.894302	1	0.232	0.826	0
251260	Nijmegen Breakage Syndrome	pulmonary ionocyte; type II pneumocyte	-0.676517	1	0.812	0.918	0
251260	Nijmegen Breakage Syndrome	pulmonary artery endothelial cell	-0.609713	1	0.918	0.918	0
251260	Nijmegen Breakage Syndrome	capillary endothelial cell	-0.365403	1	0.705	0.918	0
251260	Nijmegen Breakage Syndrome	pericyte cell	1.18179	1	0.178	0.826	0
251260	Nijmegen Breakage Syndrome	B cell	-0.987937	1	0.887	0.918	0
251260	Nijmegen Breakage Syndrome	neutrophil	-0.987937	1	0.753	0.918	0
251260	Nijmegen Breakage Syndrome	alveolar macrophage	0.281303	1	0.236	0.826	0
251260	Nijmegen Breakage Syndrome	classical monocyte	-0.151154	1	0.442	0.918	0
251260	Nijmegen Breakage Syndrome	non-classical monocyte	2.64352	1	0.006	0.084	1
251260	Nijmegen Breakage Syndrome	lymphocyte	-0.772547	1	0.904	0.918	0
251260	Nijmegen Breakage Syndrome	myofibroblast cell	0.146838	1	0.297	0.8316	0
251260	Nijmegen Breakage Syndrome	fibroblast	-0.265754	1	0.663	0.918	0
251260	Nijmegen Breakage Syndrome	fibroblast.1	-0.33079	1	0.723	0.918	0
252500	Mucolipidosis Ii Alpha/beta	ciliated epithelial cell	0.00372885	1	0.365	0.748	0
252500	Mucolipidosis Ii Alpha/beta	pulmonary ionocyte; type II pneumocyte	2.3289	1	0.033	0.427	0
252500	Mucolipidosis Ii Alpha/beta	pulmonary artery endothelial cell	-0.554354	1	0.904	0.948	0
252500	Mucolipidosis Ii Alpha/beta	capillary endothelial cell	-0.788949	1	0.913	0.948	0
252500	Mucolipidosis Ii Alpha/beta	pericyte cell	-1.16762	1	0.937	0.948	0
252500	Mucolipidosis Ii Alpha/beta	B cell	-0.0155833	1	0.374	0.748	0
252500	Mucolipidosis Ii Alpha/beta	neutrophil	-1.16762	1	0.828	0.948	0
252500	Mucolipidosis Ii Alpha/beta	alveolar macrophage	1.24336	1	0.093	0.434	0
252500	Mucolipidosis Ii Alpha/beta	classical monocyte	-0.29373	1	0.546	0.948	0
252500	Mucolipidosis Ii Alpha/beta	non-classical monocyte	1.09526	1	0.061	0.427	0
252500	Mucolipidosis Ii Alpha/beta	lymphocyte	0.539226	1	0.142	0.497	0
252500	Mucolipidosis Ii Alpha/beta	myofibroblast cell	-0.551862	1	0.831	0.948	0
252500	Mucolipidosis Ii Alpha/beta	fibroblast	-0.701063	1	0.948	0.948	0
252500	Mucolipidosis Ii Alpha/beta	fibroblast.1	0.0303167	1	0.294	0.748	0
PS607014	Mucopolysaccharidoses	ciliated epithelial cell	-0.592779	6	0.982	0.99	0
PS607014	Mucopolysaccharidoses	pulmonary ionocyte; type II pneumocyte	-0.299632	6	0.564	0.966	0
PS607014	Mucopolysaccharidoses	pulmonary artery endothelial cell	-0.389401	6	0.96	0.99	0
PS607014	Mucopolysaccharidoses	capillary endothelial cell	-0.162372	6	0.674	0.966	0
PS607014	Mucopolysaccharidoses	pericyte cell	-0.8068	6	0.99	0.99	0
PS607014	Mucopolysaccharidoses	B cell	0.399865	6	0.013	0.0606667	0
PS607014	Mucopolysaccharidoses	neutrophil	-1.02804	6	0.961	0.99	0
PS607014	Mucopolysaccharidoses	alveolar macrophage	1.41901	6	0.003	0.042	1
PS607014	Mucopolysaccharidoses	classical monocyte	-0.111443	6	0.291	0.582	0
PS607014	Mucopolysaccharidoses	non-classical monocyte	-0.358854	6	0.69	0.966	0
PS607014	Mucopolysaccharidoses	lymphocyte	0.511066	6	0.009	0.0606667	0
PS607014	Mucopolysaccharidoses	myofibroblast cell	0.0189966	6	0.254	0.582	0
PS607014	Mucopolysaccharidoses	fibroblast	0.408051	6	0.034	0.119	0
PS607014	Mucopolysaccharidoses	fibroblast.1	0.124181	6	0.13	0.364	0
253300	Spinal Muscular Atrophy, Type I	ciliated epithelial cell	2.75535	1	0.082	0.648667	0
253300	Spinal Muscular Atrophy, Type I	pulmonary ionocyte; type II pneumocyte	-0.156175	1	0.428	0.734222	0
253300	Spinal Muscular Atrophy, Type I	pulmonary artery endothelial cell	0.39713	1	0.268	0.648667	0
253300	Spinal Muscular Atrophy, Type I	capillary endothelial cell	-0.600672	1	0.869	0.982	0
253300	Spinal Muscular Atrophy, Type I	pericyte cell	-0.976277	1	0.914	0.982	0
253300	Spinal Muscular Atrophy, Type I	B cell	0.22787	1	0.148	0.648667	0
253300	Spinal Muscular Atrophy, Type I	neutrophil	-0.282207	1	0.472	0.734222	0
253300	Spinal Muscular Atrophy, Type I	alveolar macrophage	-1.12145	1	0.982	0.982	0
253300	Spinal Muscular Atrophy, Type I	classical monocyte	-0.165393	1	0.416	0.734222	0
253300	Spinal Muscular Atrophy, Type I	non-classical monocyte	-1.05895	1	0.966	0.982	0
253300	Spinal Muscular Atrophy, Type I	lymphocyte	0.154391	1	0.222	0.648667	0
253300	Spinal Muscular Atrophy, Type I	myofibroblast cell	1.07328	1	0.13	0.648667	0
253300	Spinal Muscular Atrophy, Type I	fibroblast	0.166227	1	0.278	0.648667	0
253300	Spinal Muscular Atrophy, Type I	fibroblast.1	-0.413127	1	0.785	0.982	0
PS253310	Lethal congenital contracture syndrome	ciliated epithelial cell	-0.00503146	2	0.559	0.711455	0
PS253310	Lethal congenital contracture syndrome	pulmonary ionocyte; type II pneumocyte	-1.11172	2	0.991	0.991	0
PS253310	Lethal congenital contracture syndrome	pulmonary artery endothelial cell	0.307117	2	0.32	0.513333	0
PS253310	Lethal congenital contracture syndrome	capillary endothelial cell	0.309132	2	0.33	0.513333	0
PS253310	Lethal congenital contracture syndrome	pericyte cell	0.681715	2	0.256	0.513333	0
PS253310	Lethal congenital contracture syndrome	B cell	0.200583	2	0.185	0.513333	0
PS253310	Lethal congenital contracture syndrome	neutrophil	0.0145648	2	0.227	0.513333	0
PS253310	Lethal congenital contracture syndrome	alveolar macrophage	0.538452	2	0.192	0.513333	0
PS253310	Lethal congenital contracture syndrome	classical monocyte	-0.732478	2	0.955	0.991	0
PS253310	Lethal congenital contracture syndrome	non-classical monocyte	-0.776837	2	0.931	0.991	0
PS253310	Lethal congenital contracture syndrome	lymphocyte	0.000273503	2	0.327	0.513333	0
PS253310	Lethal congenital contracture syndrome	myofibroblast cell	-0.0914425	2	0.524	0.711455	0
PS253310	Lethal congenital contracture syndrome	fibroblast	0.485597	2	0.188	0.513333	0
PS253310	Lethal congenital contracture syndrome	fibroblast.1	0.180077	2	0.263	0.513333	0
253550	Spinal Muscular Atrophy, Type Ii	ciliated epithelial cell	2.75535	1	0.074	0.672	0
253550	Spinal Muscular Atrophy, Type Ii	pulmonary ionocyte; type II pneumocyte	-0.156175	1	0.44	0.684444	0
253550	Spinal Muscular Atrophy, Type Ii	pulmonary artery endothelial cell	0.39713	1	0.253	0.684444	0
253550	Spinal Muscular Atrophy, Type Ii	capillary endothelial cell	-0.600672	1	0.862	0.979	0
253550	Spinal Muscular Atrophy, Type Ii	pericyte cell	-0.976277	1	0.908	0.979	0
253550	Spinal Muscular Atrophy, Type Ii	B cell	0.22787	1	0.161	0.684444	0
253550	Spinal Muscular Atrophy, Type Ii	neutrophil	-0.282207	1	0.439	0.684444	0
253550	Spinal Muscular Atrophy, Type Ii	alveolar macrophage	-1.12145	1	0.979	0.979	0
253550	Spinal Muscular Atrophy, Type Ii	classical monocyte	-0.165393	1	0.421	0.684444	0
253550	Spinal Muscular Atrophy, Type Ii	non-classical monocyte	-1.05895	1	0.957	0.979	0
253550	Spinal Muscular Atrophy, Type Ii	lymphocyte	0.154391	1	0.218	0.684444	0
253550	Spinal Muscular Atrophy, Type Ii	myofibroblast cell	1.07328	1	0.096	0.672	0
253550	Spinal Muscular Atrophy, Type Ii	fibroblast	0.166227	1	0.296	0.684444	0
253550	Spinal Muscular Atrophy, Type Ii	fibroblast.1	-0.413127	1	0.766	0.979	0
PS253600	Muscular dystrophy, limb-girdle, autosomal recessive	ciliated epithelial cell	-0.522395	4	0.917	0.968	0
PS253600	Muscular dystrophy, limb-girdle, autosomal recessive	pulmonary ionocyte; type II pneumocyte	-0.352067	4	0.65	0.968	0
PS253600	Muscular dystrophy, limb-girdle, autosomal recessive	pulmonary artery endothelial cell	-0.457965	4	0.958	0.968	0
PS253600	Muscular dystrophy, limb-girdle, autosomal recessive	capillary endothelial cell	-0.549322	4	0.968	0.968	0
PS253600	Muscular dystrophy, limb-girdle, autosomal recessive	pericyte cell	-0.165965	4	0.613	0.968	0
PS253600	Muscular dystrophy, limb-girdle, autosomal recessive	B cell	-0.541163	4	0.79	0.968	0
PS253600	Muscular dystrophy, limb-girdle, autosomal recessive	neutrophil	-0.533832	4	0.656	0.968	0
PS253600	Muscular dystrophy, limb-girdle, autosomal recessive	alveolar macrophage	-0.548218	4	0.955	0.968	0
PS253600	Muscular dystrophy, limb-girdle, autosomal recessive	classical monocyte	-0.455696	4	0.824	0.968	0
PS253600	Muscular dystrophy, limb-girdle, autosomal recessive	non-classical monocyte	-0.517282	4	0.831	0.968	0
PS253600	Muscular dystrophy, limb-girdle, autosomal recessive	lymphocyte	-0.53751	4	0.931	0.968	0
PS253600	Muscular dystrophy, limb-girdle, autosomal recessive	myofibroblast cell	1.34773	4	0.006	0.028	1
PS253600	Muscular dystrophy, limb-girdle, autosomal recessive	fibroblast	1.96078	4	0	0	1
PS253600	Muscular dystrophy, limb-girdle, autosomal recessive	fibroblast.1	1.55667	4	0.001	0.007	1
PS254090	Ullrich congenital muscular dystrophy	ciliated epithelial cell	-0.544248	3	0.903	0.949	0
PS254090	Ullrich congenital muscular dystrophy	pulmonary ionocyte; type II pneumocyte	-0.434097	3	0.706	0.949	0
PS254090	Ullrich congenital muscular dystrophy	pulmonary artery endothelial cell	-0.474112	3	0.949	0.949	0
PS254090	Ullrich congenital muscular dystrophy	capillary endothelial cell	-0.585499	3	0.944	0.949	0
PS254090	Ullrich congenital muscular dystrophy	pericyte cell	-0.061894	3	0.564	0.949	0
PS254090	Ullrich congenital muscular dystrophy	B cell	-0.625682	3	0.833	0.949	0
PS254090	Ullrich congenital muscular dystrophy	neutrophil	-0.55452	3	0.662	0.949	0
PS254090	Ullrich congenital muscular dystrophy	alveolar macrophage	-0.598661	3	0.938	0.949	0
PS254090	Ullrich congenital muscular dystrophy	classical monocyte	-0.520005	3	0.824	0.949	0
PS254090	Ullrich congenital muscular dystrophy	non-classical monocyte	-0.580225	3	0.856	0.949	0
PS254090	Ullrich congenital muscular dystrophy	lymphocyte	-0.576152	3	0.913	0.949	0
PS254090	Ullrich congenital muscular dystrophy	myofibroblast cell	1.27646	3	0.018	0.084	1
PS254090	Ullrich congenital muscular dystrophy	fibroblast	2.2625	3	0.001	0.007	1
PS254090	Ullrich congenital muscular dystrophy	fibroblast.1	2.00856	3	0.001	0.007	1
255320	Minicore Myopathy With External Ophthalmoplegia	ciliated epithelial cell	-0.315344	1	0.652	0.813	0
255320	Minicore Myopathy With External Ophthalmoplegia	pulmonary ionocyte; type II pneumocyte	-0.421235	1	0.643	0.813	0
255320	Minicore Myopathy With External Ophthalmoplegia	pulmonary artery endothelial cell	-0.370862	1	0.789	0.813	0
255320	Minicore Myopathy With External Ophthalmoplegia	capillary endothelial cell	-0.421235	1	0.761	0.813	0
255320	Minicore Myopathy With External Ophthalmoplegia	pericyte cell	-0.421235	1	0.702	0.813	0
255320	Minicore Myopathy With External Ophthalmoplegia	B cell	0.843964	1	0.098	0.686	0
255320	Minicore Myopathy With External Ophthalmoplegia	neutrophil	-0.421235	1	0.555	0.813	0
255320	Minicore Myopathy With External Ophthalmoplegia	alveolar macrophage	-0.261193	1	0.587	0.813	0
255320	Minicore Myopathy With External Ophthalmoplegia	classical monocyte	0.22807	1	0.156	0.728	0
255320	Minicore Myopathy With External Ophthalmoplegia	non-classical monocyte	3.24243	1	0.001	0.014	1
255320	Minicore Myopathy With External Ophthalmoplegia	lymphocyte	-0.421235	1	0.687	0.813	0
255320	Minicore Myopathy With External Ophthalmoplegia	myofibroblast cell	-0.421235	1	0.758	0.813	0
255320	Minicore Myopathy With External Ophthalmoplegia	fibroblast	-0.418417	1	0.813	0.813	0
255320	Minicore Myopathy With External Ophthalmoplegia	fibroblast.1	-0.421235	1	0.788	0.813	0
PS108720	Atelosteogenesis	ciliated epithelial cell	2.79776	1	0.085	0.7035	0
PS108720	Atelosteogenesis	pulmonary ionocyte; type II pneumocyte	0.0580591	1	0.17	0.7035	0
PS108720	Atelosteogenesis	pulmonary artery endothelial cell	0.235315	1	0.302	0.8456	0
PS108720	Atelosteogenesis	capillary endothelial cell	1.30473	1	0.156	0.7035	0
PS108720	Atelosteogenesis	pericyte cell	-0.847375	1	0.874	0.885	0
PS108720	Atelosteogenesis	B cell	-0.847375	1	0.843	0.885	0
PS108720	Atelosteogenesis	neutrophil	-0.847375	1	0.748	0.885	0
PS108720	Atelosteogenesis	alveolar macrophage	0.359672	1	0.201	0.7035	0
PS108720	Atelosteogenesis	classical monocyte	-0.311124	1	0.59	0.885	0
PS108720	Atelosteogenesis	non-classical monocyte	-0.847375	1	0.885	0.885	0
PS108720	Atelosteogenesis	lymphocyte	-0.251674	1	0.569	0.885	0
PS108720	Atelosteogenesis	myofibroblast cell	-0.35458	1	0.714	0.885	0
PS108720	Atelosteogenesis	fibroblast	-0.116124	1	0.577	0.885	0
PS108720	Atelosteogenesis	fibroblast.1	-0.332536	1	0.706	0.885	0
PS256520	Neu-Laxova syndrome	ciliated epithelial cell	-0.582629	1	0.828	0.917538	0
PS256520	Neu-Laxova syndrome	pulmonary ionocyte; type II pneumocyte	-0.454435	1	0.7	0.917538	0
PS256520	Neu-Laxova syndrome	pulmonary artery endothelial cell	-0.585678	1	0.921	0.921	0
PS256520	Neu-Laxova syndrome	capillary endothelial cell	-0.508288	1	0.801	0.917538	0
PS256520	Neu-Laxova syndrome	pericyte cell	-0.185216	1	0.577	0.917538	0
PS256520	Neu-Laxova syndrome	B cell	1.62122	1	0.063	0.441	0
PS256520	Neu-Laxova syndrome	neutrophil	-0.228408	1	0.418	0.917538	0
PS256520	Neu-Laxova syndrome	alveolar macrophage	2.81563	1	0.011	0.154	0
PS256520	Neu-Laxova syndrome	classical monocyte	-0.429907	1	0.684	0.917538	0
PS256520	Neu-Laxova syndrome	non-classical monocyte	-0.549295	1	0.756	0.917538	0
PS256520	Neu-Laxova syndrome	lymphocyte	0.30766	1	0.177	0.826	0
PS256520	Neu-Laxova syndrome	myofibroblast cell	-0.619808	1	0.852	0.917538	0
PS256520	Neu-Laxova syndrome	fibroblast	-0.479585	1	0.852	0.917538	0
PS256520	Neu-Laxova syndrome	fibroblast.1	-0.121257	1	0.543	0.917538	0
257200	Niemann-pick Disease, Type A	ciliated epithelial cell	1.05106	1	0.219	0.578667	0
257200	Niemann-pick Disease, Type A	pulmonary ionocyte; type II pneumocyte	0.611654	1	0.095	0.578667	0
257200	Niemann-pick Disease, Type A	pulmonary artery endothelial cell	-0.0416742	1	0.576	0.896	0
257200	Niemann-pick Disease, Type A	capillary endothelial cell	1.08844	1	0.162	0.578667	0
257200	Niemann-pick Disease, Type A	pericyte cell	-1.06239	1	0.919	0.972	0
257200	Niemann-pick Disease, Type A	B cell	-0.669497	1	0.776	0.972	0
257200	Niemann-pick Disease, Type A	neutrophil	-1.44404	1	0.904	0.972	0
257200	Niemann-pick Disease, Type A	alveolar macrophage	-0.93793	1	0.97	0.972	0
257200	Niemann-pick Disease, Type A	classical monocyte	-1.05922	1	0.972	0.972	0
257200	Niemann-pick Disease, Type A	non-classical monocyte	-0.23103	1	0.481	0.896	0
257200	Niemann-pick Disease, Type A	lymphocyte	0.0435784	1	0.248	0.578667	0
257200	Niemann-pick Disease, Type A	myofibroblast cell	-0.0462857	1	0.514	0.896	0
257200	Niemann-pick Disease, Type A	fibroblast	2.04713	1	0.016	0.224	0
257200	Niemann-pick Disease, Type A	fibroblast.1	0.650195	1	0.166	0.578667	0
259775	Raine Syndrome	ciliated epithelial cell	-0.342814	1	0.689	0.918615	0
259775	Raine Syndrome	pulmonary ionocyte; type II pneumocyte	-0.484463	1	0.696	0.918615	0
259775	Raine Syndrome	pulmonary artery endothelial cell	-0.632753	1	0.932	0.932	0
259775	Raine Syndrome	capillary endothelial cell	-0.632753	1	0.853	0.918615	0
259775	Raine Syndrome	pericyte cell	-0.632753	1	0.806	0.918615	0
259775	Raine Syndrome	B cell	-0.632753	1	0.737	0.918615	0
259775	Raine Syndrome	neutrophil	-0.632753	1	0.626	0.918615	0
259775	Raine Syndrome	alveolar macrophage	-0.308263	1	0.642	0.918615	0
259775	Raine Syndrome	classical monocyte	0.482751	1	0.094	0.438667	0
259775	Raine Syndrome	non-classical monocyte	1.29918	1	0.049	0.343	0
259775	Raine Syndrome	lymphocyte	-0.457643	1	0.713	0.918615	0
259775	Raine Syndrome	myofibroblast cell	-0.208603	1	0.624	0.918615	0
259775	Raine Syndrome	fibroblast	0.305483	1	0.198	0.693	0
259775	Raine Syndrome	fibroblast.1	2.87814	1	0.008	0.112	0
261740	Glycogen Storage Disease Of Heart, Lethal Congenital	ciliated epithelial cell	2.91573	1	0.061	0.539	0
261740	Glycogen Storage Disease Of Heart, Lethal Congenital	pulmonary ionocyte; type II pneumocyte	-0.772697	1	0.851	0.896	0
261740	Glycogen Storage Disease Of Heart, Lethal Congenital	pulmonary artery endothelial cell	-0.478517	1	0.864	0.896	0
261740	Glycogen Storage Disease Of Heart, Lethal Congenital	capillary endothelial cell	0.174892	1	0.294	0.802667	0
261740	Glycogen Storage Disease Of Heart, Lethal Congenital	pericyte cell	-0.962065	1	0.896	0.896	0
261740	Glycogen Storage Disease Of Heart, Lethal Congenital	B cell	-0.962065	1	0.884	0.896	0
261740	Glycogen Storage Disease Of Heart, Lethal Congenital	neutrophil	0.405726	1	0.128	0.597333	0
261740	Glycogen Storage Disease Of Heart, Lethal Congenital	alveolar macrophage	-0.141695	1	0.531	0.896	0
261740	Glycogen Storage Disease Of Heart, Lethal Congenital	classical monocyte	0.0740512	1	0.188	0.658	0
261740	Glycogen Storage Disease Of Heart, Lethal Congenital	non-classical monocyte	0.964591	1	0.077	0.539	0
261740	Glycogen Storage Disease Of Heart, Lethal Congenital	lymphocyte	-0.596458	1	0.829	0.896	0
261740	Glycogen Storage Disease Of Heart, Lethal Congenital	myofibroblast cell	-0.086983	1	0.55	0.896	0
261740	Glycogen Storage Disease Of Heart, Lethal Congenital	fibroblast	0.0190479	1	0.344	0.802667	0
261740	Glycogen Storage Disease Of Heart, Lethal Congenital	fibroblast.1	-0.553562	1	0.849	0.896	0
263210	Gillessen-kaesbach-nishimura Syndrome	ciliated epithelial cell	0.35854	1	0.302	0.666	0
263210	Gillessen-kaesbach-nishimura Syndrome	pulmonary ionocyte; type II pneumocyte	2.20243	1	0.028	0.392	0
263210	Gillessen-kaesbach-nishimura Syndrome	pulmonary artery endothelial cell	0.933871	1	0.145	0.666	0
263210	Gillessen-kaesbach-nishimura Syndrome	capillary endothelial cell	-0.325859	1	0.69	0.913818	0
263210	Gillessen-kaesbach-nishimura Syndrome	pericyte cell	-1.4174	1	0.971	0.971	0
263210	Gillessen-kaesbach-nishimura Syndrome	B cell	-0.610222	1	0.718	0.913818	0
263210	Gillessen-kaesbach-nishimura Syndrome	neutrophil	-1.4174	1	0.882	0.970308	0
263210	Gillessen-kaesbach-nishimura Syndrome	alveolar macrophage	-0.227778	1	0.536	0.833778	0
263210	Gillessen-kaesbach-nishimura Syndrome	classical monocyte	-0.242869	1	0.471	0.82425	0
263210	Gillessen-kaesbach-nishimura Syndrome	non-classical monocyte	-0.880175	1	0.901	0.970308	0
263210	Gillessen-kaesbach-nishimura Syndrome	lymphocyte	0.185353	1	0.209	0.666	0
263210	Gillessen-kaesbach-nishimura Syndrome	myofibroblast cell	0.0537852	1	0.333	0.666	0
263210	Gillessen-kaesbach-nishimura Syndrome	fibroblast	1.31286	1	0.059	0.413	0
263210	Gillessen-kaesbach-nishimura Syndrome	fibroblast.1	0.0748646	1	0.293	0.666	0
PS208500	Short-rib thoracic dysplasia	ciliated epithelial cell	3.29471	6	0	0	1
PS208500	Short-rib thoracic dysplasia	pulmonary ionocyte; type II pneumocyte	-0.406841	6	0.763	0.878	0
PS208500	Short-rib thoracic dysplasia	pulmonary artery endothelial cell	-0.254029	6	0.866	0.878	0
PS208500	Short-rib thoracic dysplasia	capillary endothelial cell	-0.29413	6	0.842	0.878	0
PS208500	Short-rib thoracic dysplasia	pericyte cell	-0.203521	6	0.666	0.878	0
PS208500	Short-rib thoracic dysplasia	B cell	-0.428298	6	0.73	0.878	0
PS208500	Short-rib thoracic dysplasia	neutrophil	-0.51943	6	0.667	0.878	0
PS208500	Short-rib thoracic dysplasia	alveolar macrophage	-0.316318	6	0.788	0.878	0
PS208500	Short-rib thoracic dysplasia	classical monocyte	-0.405109	6	0.802	0.878	0
PS208500	Short-rib thoracic dysplasia	non-classical monocyte	-0.419838	6	0.779	0.878	0
PS208500	Short-rib thoracic dysplasia	lymphocyte	-0.40201	6	0.878	0.878	0
PS208500	Short-rib thoracic dysplasia	myofibroblast cell	-0.0848682	6	0.524	0.878	0
PS208500	Short-rib thoracic dysplasia	fibroblast	-0.107556	6	0.584	0.878	0
PS208500	Short-rib thoracic dysplasia	fibroblast.1	-0.200469	6	0.711	0.878	0
264350	Pseudohypoaldosteronism, Type I, Autosomal Recessive	ciliated epithelial cell	1.03549	2	0.228	0.798	0
264350	Pseudohypoaldosteronism, Type I, Autosomal Recessive	pulmonary ionocyte; type II pneumocyte	1.84354	2	0.006	0.084	1
264350	Pseudohypoaldosteronism, Type I, Autosomal Recessive	pulmonary artery endothelial cell	-0.424492	2	0.924	0.924	0
264350	Pseudohypoaldosteronism, Type I, Autosomal Recessive	capillary endothelial cell	-0.374613	2	0.784	0.924	0
264350	Pseudohypoaldosteronism, Type I, Autosomal Recessive	pericyte cell	-0.424492	2	0.779	0.924	0
264350	Pseudohypoaldosteronism, Type I, Autosomal Recessive	B cell	-0.394855	2	0.629	0.924	0
264350	Pseudohypoaldosteronism, Type I, Autosomal Recessive	neutrophil	0.83111	2	0.079	0.553	0
264350	Pseudohypoaldosteronism, Type I, Autosomal Recessive	alveolar macrophage	-0.424492	2	0.832	0.924	0
264350	Pseudohypoaldosteronism, Type I, Autosomal Recessive	classical monocyte	-0.349956	2	0.655	0.924	0
264350	Pseudohypoaldosteronism, Type I, Autosomal Recessive	non-classical monocyte	0.314459	2	0.158	0.737333	0
264350	Pseudohypoaldosteronism, Type I, Autosomal Recessive	lymphocyte	-0.405484	2	0.765	0.924	0
264350	Pseudohypoaldosteronism, Type I, Autosomal Recessive	myofibroblast cell	-0.424492	2	0.839	0.924	0
264350	Pseudohypoaldosteronism, Type I, Autosomal Recessive	fibroblast	-0.37723	2	0.874	0.924	0
264350	Pseudohypoaldosteronism, Type I, Autosomal Recessive	fibroblast.1	-0.424492	2	0.863	0.924	0
265100	Pulmonary Alveolar Microlithiasis	ciliated epithelial cell	-0.272503	1	0.641	0.707538	0
265100	Pulmonary Alveolar Microlithiasis	pulmonary ionocyte; type II pneumocyte	3.47434	1	0.002	0.028	1
265100	Pulmonary Alveolar Microlithiasis	pulmonary artery endothelial cell	-0.269879	1	0.721	0.721	0
265100	Pulmonary Alveolar Microlithiasis	capillary endothelial cell	-0.260355	1	0.622	0.707538	0
265100	Pulmonary Alveolar Microlithiasis	pericyte cell	-0.269043	1	0.553	0.707538	0
265100	Pulmonary Alveolar Microlithiasis	B cell	-0.263282	1	0.465	0.707538	0
265100	Pulmonary Alveolar Microlithiasis	neutrophil	-0.272136	1	0.403	0.707538	0
265100	Pulmonary Alveolar Microlithiasis	alveolar macrophage	-0.270308	1	0.563	0.707538	0
265100	Pulmonary Alveolar Microlithiasis	classical monocyte	-0.274676	1	0.513	0.707538	0
265100	Pulmonary Alveolar Microlithiasis	non-classical monocyte	-0.268303	1	0.506	0.707538	0
265100	Pulmonary Alveolar Microlithiasis	lymphocyte	-0.263552	1	0.546	0.707538	0
265100	Pulmonary Alveolar Microlithiasis	myofibroblast cell	-0.275194	1	0.657	0.707538	0
265100	Pulmonary Alveolar Microlithiasis	fibroblast	-0.257678	1	0.656	0.707538	0
265100	Pulmonary Alveolar Microlithiasis	fibroblast.1	-0.257426	1	0.615	0.707538	0
PS265120	Surfactant metabolism dysfunction, pulmonary	ciliated epithelial cell	-0.289	6	0.829	0.928	0
PS265120	Surfactant metabolism dysfunction, pulmonary	pulmonary ionocyte; type II pneumocyte	1.51799	6	0.001	0.014	1
PS265120	Surfactant metabolism dysfunction, pulmonary	pulmonary artery endothelial cell	-0.32942	6	0.928	0.928	0
PS265120	Surfactant metabolism dysfunction, pulmonary	capillary endothelial cell	-0.357801	6	0.893	0.928	0
PS265120	Surfactant metabolism dysfunction, pulmonary	pericyte cell	-0.369228	6	0.83	0.928	0
PS265120	Surfactant metabolism dysfunction, pulmonary	B cell	-0.307869	6	0.536	0.928	0
PS265120	Surfactant metabolism dysfunction, pulmonary	neutrophil	-0.262992	6	0.359	0.928	0
PS265120	Surfactant metabolism dysfunction, pulmonary	alveolar macrophage	0.243652	6	0.107	0.499333	0
PS265120	Surfactant metabolism dysfunction, pulmonary	classical monocyte	0.0432885	6	0.061	0.427	0
PS265120	Surfactant metabolism dysfunction, pulmonary	non-classical monocyte	-0.0675595	6	0.25	0.875	0
PS265120	Surfactant metabolism dysfunction, pulmonary	lymphocyte	-0.412243	6	0.851	0.928	0
PS265120	Surfactant metabolism dysfunction, pulmonary	myofibroblast cell	-0.370498	6	0.88	0.928	0
PS265120	Surfactant metabolism dysfunction, pulmonary	fibroblast	-0.313723	6	0.908	0.928	0
PS265120	Surfactant metabolism dysfunction, pulmonary	fibroblast.1	-0.288479	6	0.865	0.928	0
PS212066	Congenital disorders of glycosylation, type II	ciliated epithelial cell	-0.427152	1	0.765	0.965	0
PS212066	Congenital disorders of glycosylation, type II	pulmonary ionocyte; type II pneumocyte	-0.537057	1	0.721	0.965	0
PS212066	Congenital disorders of glycosylation, type II	pulmonary artery endothelial cell	-0.460615	1	0.868	0.965	0
PS212066	Congenital disorders of glycosylation, type II	capillary endothelial cell	-0.744241	1	0.914	0.965	0
PS212066	Congenital disorders of glycosylation, type II	pericyte cell	-0.962222	1	0.891	0.965	0
PS212066	Congenital disorders of glycosylation, type II	B cell	1.0533	1	0.08	0.28	0
PS212066	Congenital disorders of glycosylation, type II	neutrophil	-0.962222	1	0.782	0.965	0
PS212066	Congenital disorders of glycosylation, type II	alveolar macrophage	1.79143	1	0.057	0.266	0
PS212066	Congenital disorders of glycosylation, type II	classical monocyte	1.02045	1	0.05	0.266	0
PS212066	Congenital disorders of glycosylation, type II	non-classical monocyte	-0.207621	1	0.476	0.965	0
PS212066	Congenital disorders of glycosylation, type II	lymphocyte	1.88143	1	0.035	0.266	0
PS212066	Congenital disorders of glycosylation, type II	myofibroblast cell	-0.0952057	1	0.566	0.965	0
PS212066	Congenital disorders of glycosylation, type II	fibroblast	-0.520661	1	0.879	0.965	0
PS212066	Congenital disorders of glycosylation, type II	fibroblast.1	-0.829619	1	0.965	0.965	0
267430	Renal Tubular Dysgenesis	ciliated epithelial cell	-0.298211	3	0.748	0.775	0
267430	Renal Tubular Dysgenesis	pulmonary ionocyte; type II pneumocyte	-0.298211	3	0.565	0.775	0
267430	Renal Tubular Dysgenesis	pulmonary artery endothelial cell	-0.257345	3	0.727	0.775	0
267430	Renal Tubular Dysgenesis	capillary endothelial cell	-0.274945	3	0.715	0.775	0
267430	Renal Tubular Dysgenesis	pericyte cell	-0.298211	3	0.685	0.775	0
267430	Renal Tubular Dysgenesis	B cell	-0.298211	3	0.493	0.775	0
267430	Renal Tubular Dysgenesis	neutrophil	-0.298211	3	0.447	0.775	0
267430	Renal Tubular Dysgenesis	alveolar macrophage	-0.298211	3	0.671	0.775	0
267430	Renal Tubular Dysgenesis	classical monocyte	-0.298211	3	0.558	0.775	0
267430	Renal Tubular Dysgenesis	non-classical monocyte	-0.243707	3	0.468	0.775	0
267430	Renal Tubular Dysgenesis	lymphocyte	-0.274945	3	0.576	0.775	0
267430	Renal Tubular Dysgenesis	myofibroblast cell	-0.23179	3	0.656	0.775	0
267430	Renal Tubular Dysgenesis	fibroblast	-0.285191	3	0.775	0.775	0
267430	Renal Tubular Dysgenesis	fibroblast.1	-0.232676	3	0.665	0.775	0
270400	Smith-lemli-opitz Syndrome	ciliated epithelial cell	-0.827286	1	0.917	0.981	0
270400	Smith-lemli-opitz Syndrome	pulmonary ionocyte; type II pneumocyte	1.01498	1	0.076	0.392	0
270400	Smith-lemli-opitz Syndrome	pulmonary artery endothelial cell	-0.142967	1	0.602	0.981	0
270400	Smith-lemli-opitz Syndrome	capillary endothelial cell	-0.590512	1	0.854	0.981	0
270400	Smith-lemli-opitz Syndrome	pericyte cell	1.61869	1	0.128	0.392	0
270400	Smith-lemli-opitz Syndrome	B cell	0.358751	1	0.14	0.392	0
270400	Smith-lemli-opitz Syndrome	neutrophil	-1.25713	1	0.875	0.981	0
270400	Smith-lemli-opitz Syndrome	alveolar macrophage	1.51581	1	0.08	0.392	0
270400	Smith-lemli-opitz Syndrome	classical monocyte	-0.453017	1	0.673	0.981	0
270400	Smith-lemli-opitz Syndrome	non-classical monocyte	-1.25713	1	0.981	0.981	0
270400	Smith-lemli-opitz Syndrome	lymphocyte	0.128731	1	0.222	0.444	0
270400	Smith-lemli-opitz Syndrome	myofibroblast cell	-1.25713	1	0.979	0.981	0
270400	Smith-lemli-opitz Syndrome	fibroblast	0.926014	1	0.112	0.392	0
270400	Smith-lemli-opitz Syndrome	fibroblast.1	0.222192	1	0.217	0.444	0
271665	Spondylometaepiphyseal Dysplasia, Short Limb-hand Type	ciliated epithelial cell	-0.541191	1	0.803	0.833	0
271665	Spondylometaepiphyseal Dysplasia, Short Limb-hand Type	pulmonary ionocyte; type II pneumocyte	-0.498456	1	0.696	0.833	0
271665	Spondylometaepiphyseal Dysplasia, Short Limb-hand Type	pulmonary artery endothelial cell	-0.106421	1	0.585	0.833	0
271665	Spondylometaepiphyseal Dysplasia, Short Limb-hand Type	capillary endothelial cell	-0.564284	1	0.833	0.833	0
271665	Spondylometaepiphyseal Dysplasia, Short Limb-hand Type	pericyte cell	-0.337579	1	0.66	0.833	0
271665	Spondylometaepiphyseal Dysplasia, Short Limb-hand Type	B cell	-0.521946	1	0.681	0.833	0
271665	Spondylometaepiphyseal Dysplasia, Short Limb-hand Type	neutrophil	-0.433649	1	0.549	0.833	0
271665	Spondylometaepiphyseal Dysplasia, Short Limb-hand Type	alveolar macrophage	-0.527698	1	0.805	0.833	0
271665	Spondylometaepiphyseal Dysplasia, Short Limb-hand Type	classical monocyte	-0.5294	1	0.745	0.833	0
271665	Spondylometaepiphyseal Dysplasia, Short Limb-hand Type	non-classical monocyte	-0.531542	1	0.748	0.833	0
271665	Spondylometaepiphyseal Dysplasia, Short Limb-hand Type	lymphocyte	-0.440353	1	0.722	0.833	0
271665	Spondylometaepiphyseal Dysplasia, Short Limb-hand Type	myofibroblast cell	1.78454	1	0.045	0.315	0
271665	Spondylometaepiphyseal Dysplasia, Short Limb-hand Type	fibroblast	0.609093	1	0.172	0.802667	0
271665	Spondylometaepiphyseal Dysplasia, Short Limb-hand Type	fibroblast.1	2.63888	1	0.011	0.154	0
275210	Tight Skin Contracture Syndrome, Lethal	ciliated epithelial cell	-0.439136	2	0.808	0.999	0
275210	Tight Skin Contracture Syndrome, Lethal	pulmonary ionocyte; type II pneumocyte	-0.24481	2	0.52	0.91525	0
275210	Tight Skin Contracture Syndrome, Lethal	pulmonary artery endothelial cell	0.753622	2	0.143	0.4004	0
275210	Tight Skin Contracture Syndrome, Lethal	capillary endothelial cell	0.366663	2	0.34	0.793333	0
275210	Tight Skin Contracture Syndrome, Lethal	pericyte cell	-0.0820974	2	0.523	0.91525	0
275210	Tight Skin Contracture Syndrome, Lethal	B cell	-0.873999	2	0.932	0.999	0
275210	Tight Skin Contracture Syndrome, Lethal	neutrophil	-1.49262	2	0.975	0.999	0
275210	Tight Skin Contracture Syndrome, Lethal	alveolar macrophage	1.03802	2	0.086	0.4004	0
275210	Tight Skin Contracture Syndrome, Lethal	classical monocyte	-0.463973	2	0.779	0.999	0
275210	Tight Skin Contracture Syndrome, Lethal	non-classical monocyte	-1.22653	2	0.999	0.999	0
275210	Tight Skin Contracture Syndrome, Lethal	lymphocyte	-0.408408	2	0.765	0.999	0
275210	Tight Skin Contracture Syndrome, Lethal	myofibroblast cell	1.68288	2	0.02	0.28	0
275210	Tight Skin Contracture Syndrome, Lethal	fibroblast	0.547404	2	0.13	0.4004	0
275210	Tight Skin Contracture Syndrome, Lethal	fibroblast.1	0.842993	2	0.076	0.4004	0
PS601495	Agammaglobulinemia	ciliated epithelial cell	-0.492552	6	0.952	0.976	0
PS601495	Agammaglobulinemia	pulmonary ionocyte; type II pneumocyte	-0.288625	6	0.536	0.976	0
PS601495	Agammaglobulinemia	pulmonary artery endothelial cell	-0.340897	6	0.938	0.976	0
PS601495	Agammaglobulinemia	capillary endothelial cell	-0.508738	6	0.976	0.976	0
PS601495	Agammaglobulinemia	pericyte cell	-0.27221	6	0.726	0.976	0
PS601495	Agammaglobulinemia	B cell	2.86428	6	0	0	1
PS601495	Agammaglobulinemia	neutrophil	-0.287137	6	0.398	0.976	0
PS601495	Agammaglobulinemia	alveolar macrophage	-0.262537	6	0.725	0.976	0
PS601495	Agammaglobulinemia	classical monocyte	-0.143757	6	0.332	0.976	0
PS601495	Agammaglobulinemia	non-classical monocyte	-0.264672	6	0.539	0.976	0
PS601495	Agammaglobulinemia	lymphocyte	-0.266918	6	0.651	0.976	0
PS601495	Agammaglobulinemia	myofibroblast cell	-0.291643	6	0.808	0.976	0
PS601495	Agammaglobulinemia	fibroblast	-0.290635	6	0.865	0.976	0
PS601495	Agammaglobulinemia	fibroblast.1	-0.272815	6	0.814	0.976	0
300853	Immunodeficiency, X-linked, With Magnesium Defect, Epstein-barr Virus Infection And Neoplasia	ciliated epithelial cell	-0.754338	1	0.891	0.96	0
300853	Immunodeficiency, X-linked, With Magnesium Defect, Epstein-barr Virus Infection And Neoplasia	pulmonary ionocyte; type II pneumocyte	-0.390771	1	0.613	0.96	0
300853	Immunodeficiency, X-linked, With Magnesium Defect, Epstein-barr Virus Infection And Neoplasia	pulmonary artery endothelial cell	0.424725	1	0.251	0.627667	0
300853	Immunodeficiency, X-linked, With Magnesium Defect, Epstein-barr Virus Infection And Neoplasia	capillary endothelial cell	-0.485527	1	0.786	0.96	0
300853	Immunodeficiency, X-linked, With Magnesium Defect, Epstein-barr Virus Infection And Neoplasia	pericyte cell	-0.332198	1	0.651	0.96	0
300853	Immunodeficiency, X-linked, With Magnesium Defect, Epstein-barr Virus Infection And Neoplasia	B cell	-0.762018	1	0.798	0.96	0
300853	Immunodeficiency, X-linked, With Magnesium Defect, Epstein-barr Virus Infection And Neoplasia	neutrophil	-1.41241	1	0.905	0.96	0
300853	Immunodeficiency, X-linked, With Magnesium Defect, Epstein-barr Virus Infection And Neoplasia	alveolar macrophage	2.03822	1	0.039	0.273	0
300853	Immunodeficiency, X-linked, With Magnesium Defect, Epstein-barr Virus Infection And Neoplasia	classical monocyte	-0.451614	1	0.705	0.96	0
300853	Immunodeficiency, X-linked, With Magnesium Defect, Epstein-barr Virus Infection And Neoplasia	non-classical monocyte	1.73203	1	0.026	0.273	0
300853	Immunodeficiency, X-linked, With Magnesium Defect, Epstein-barr Virus Infection And Neoplasia	lymphocyte	-0.928963	1	0.96	0.96	0
300853	Immunodeficiency, X-linked, With Magnesium Defect, Epstein-barr Virus Infection And Neoplasia	myofibroblast cell	0.132276	1	0.269	0.627667	0
300853	Immunodeficiency, X-linked, With Magnesium Defect, Epstein-barr Virus Infection And Neoplasia	fibroblast	0.257094	1	0.238	0.627667	0
300853	Immunodeficiency, X-linked, With Magnesium Defect, Epstein-barr Virus Infection And Neoplasia	fibroblast.1	0.933501	1	0.089	0.415333	0
PS309510	Mental retardation, X-linked syndromic	ciliated epithelial cell	0.685496	1	0.264	0.616	0
PS309510	Mental retardation, X-linked syndromic	pulmonary ionocyte; type II pneumocyte	-0.600197	1	0.757	0.997	0
PS309510	Mental retardation, X-linked syndromic	pulmonary artery endothelial cell	-0.193921	1	0.627	0.975333	0
PS309510	Mental retardation, X-linked syndromic	capillary endothelial cell	0.446207	1	0.246	0.616	0
PS309510	Mental retardation, X-linked syndromic	pericyte cell	-0.0607229	1	0.534	0.975333	0
PS309510	Mental retardation, X-linked syndromic	B cell	0.296697	1	0.15	0.602	0
PS309510	Mental retardation, X-linked syndromic	neutrophil	2.35887	1	0.031	0.434	0
PS309510	Mental retardation, X-linked syndromic	alveolar macrophage	0.711883	1	0.153	0.602	0
PS309510	Mental retardation, X-linked syndromic	classical monocyte	-1.0297	1	0.957	0.997	0
PS309510	Mental retardation, X-linked syndromic	non-classical monocyte	-1.61301	1	0.997	0.997	0
PS309510	Mental retardation, X-linked syndromic	lymphocyte	-1.12345	1	0.983	0.997	0
PS309510	Mental retardation, X-linked syndromic	myofibroblast cell	0.777989	1	0.172	0.602	0
PS309510	Mental retardation, X-linked syndromic	fibroblast	-0.441277	1	0.82	0.997	0
PS309510	Mental retardation, X-linked syndromic	fibroblast.1	-0.214877	1	0.598	0.975333	0
PS262400	Isolated growth hormone deficiency	ciliated epithelial cell	-0.708555	1	0.883	0.938	0
PS262400	Isolated growth hormone deficiency	pulmonary ionocyte; type II pneumocyte	-0.286383	1	0.512	0.938	0
PS262400	Isolated growth hormone deficiency	pulmonary artery endothelial cell	-0.519208	1	0.873	0.938	0
PS262400	Isolated growth hormone deficiency	capillary endothelial cell	-0.708555	1	0.882	0.938	0
PS262400	Isolated growth hormone deficiency	pericyte cell	-0.708555	1	0.831	0.938	0
PS262400	Isolated growth hormone deficiency	B cell	2.26444	1	0.029	0.287	0
PS262400	Isolated growth hormone deficiency	neutrophil	0.344372	1	0.122	0.3696	0
PS262400	Isolated growth hormone deficiency	alveolar macrophage	1.57084	1	0.076	0.354667	0
PS262400	Isolated growth hormone deficiency	classical monocyte	1.12348	1	0.041	0.287	0
PS262400	Isolated growth hormone deficiency	non-classical monocyte	0.438029	1	0.132	0.3696	0
PS262400	Isolated growth hormone deficiency	lymphocyte	-0.708555	1	0.877	0.938	0
PS262400	Isolated growth hormone deficiency	myofibroblast cell	-0.708555	1	0.897	0.938	0
PS262400	Isolated growth hormone deficiency	fibroblast	-0.684245	1	0.938	0.938	0
PS262400	Isolated growth hormone deficiency	fibroblast.1	-0.708555	1	0.922	0.938	0
308050	Congenital Hemidysplasia With Ichthyosiform Erythroderma And Limb Defects	ciliated epithelial cell	-0.561363	1	0.811	0.933	0
308050	Congenital Hemidysplasia With Ichthyosiform Erythroderma And Limb Defects	pulmonary ionocyte; type II pneumocyte	1.77435	1	0.043	0.301	0
308050	Congenital Hemidysplasia With Ichthyosiform Erythroderma And Limb Defects	pulmonary artery endothelial cell	0.794918	1	0.16	0.746667	0
308050	Congenital Hemidysplasia With Ichthyosiform Erythroderma And Limb Defects	capillary endothelial cell	2.34236	1	0.038	0.301	0
308050	Congenital Hemidysplasia With Ichthyosiform Erythroderma And Limb Defects	pericyte cell	-1.05926	1	0.908	0.933	0
308050	Congenital Hemidysplasia With Ichthyosiform Erythroderma And Limb Defects	B cell	-0.271231	1	0.454	0.933	0
308050	Congenital Hemidysplasia With Ichthyosiform Erythroderma And Limb Defects	neutrophil	-1.05926	1	0.812	0.933	0
308050	Congenital Hemidysplasia With Ichthyosiform Erythroderma And Limb Defects	alveolar macrophage	-0.0111384	1	0.475	0.933	0
308050	Congenital Hemidysplasia With Ichthyosiform Erythroderma And Limb Defects	classical monocyte	-0.902593	1	0.933	0.933	0
308050	Congenital Hemidysplasia With Ichthyosiform Erythroderma And Limb Defects	non-classical monocyte	-0.378199	1	0.601	0.933	0
308050	Congenital Hemidysplasia With Ichthyosiform Erythroderma And Limb Defects	lymphocyte	-0.0760545	1	0.478	0.933	0
308050	Congenital Hemidysplasia With Ichthyosiform Erythroderma And Limb Defects	myofibroblast cell	-0.101523	1	0.528	0.933	0
308050	Congenital Hemidysplasia With Ichthyosiform Erythroderma And Limb Defects	fibroblast	-0.191233	1	0.645	0.933	0
308050	Congenital Hemidysplasia With Ichthyosiform Erythroderma And Limb Defects	fibroblast.1	-0.299769	1	0.694	0.933	0
PS308240	Lymphoproliferative syndrome	ciliated epithelial cell	-0.280496	1	0.643	0.703	0
PS308240	Lymphoproliferative syndrome	pulmonary ionocyte; type II pneumocyte	-0.280496	1	0.507	0.703	0
PS308240	Lymphoproliferative syndrome	pulmonary artery endothelial cell	-0.280496	1	0.703	0.703	0
PS308240	Lymphoproliferative syndrome	capillary endothelial cell	-0.280496	1	0.66	0.703	0
PS308240	Lymphoproliferative syndrome	pericyte cell	-0.280496	1	0.605	0.703	0
PS308240	Lymphoproliferative syndrome	B cell	-0.280496	1	0.506	0.703	0
PS308240	Lymphoproliferative syndrome	neutrophil	-0.280496	1	0.446	0.703	0
PS308240	Lymphoproliferative syndrome	alveolar macrophage	-0.234494	1	0.562	0.703	0
PS308240	Lymphoproliferative syndrome	classical monocyte	-0.280496	1	0.534	0.703	0
PS308240	Lymphoproliferative syndrome	non-classical monocyte	-0.197102	1	0.428	0.703	0
PS308240	Lymphoproliferative syndrome	lymphocyte	3.47336	1	0	0	1
PS308240	Lymphoproliferative syndrome	myofibroblast cell	-0.280496	1	0.655	0.703	0
PS308240	Lymphoproliferative syndrome	fibroblast	-0.253948	1	0.687	0.703	0
PS308240	Lymphoproliferative syndrome	fibroblast.1	-0.263347	1	0.622	0.703	0
PS309800	Microphthalmia, syndromic	ciliated epithelial cell	0.0348636	1	0.369	0.738	0
PS309800	Microphthalmia, syndromic	pulmonary ionocyte; type II pneumocyte	-1.64779	1	0.992	0.992	0
PS309800	Microphthalmia, syndromic	pulmonary artery endothelial cell	1.8422	1	0.048	0.413	0
PS309800	Microphthalmia, syndromic	capillary endothelial cell	-0.298496	1	0.693	0.9702	0
PS309800	Microphthalmia, syndromic	pericyte cell	0.928687	1	0.188	0.5264	0
PS309800	Microphthalmia, syndromic	B cell	1.40911	1	0.059	0.413	0
PS309800	Microphthalmia, syndromic	neutrophil	-0.508673	1	0.599	0.931778	0
PS309800	Microphthalmia, syndromic	alveolar macrophage	-1.20287	1	0.991	0.992	0
PS309800	Microphthalmia, syndromic	classical monocyte	-1.04305	1	0.965	0.992	0
PS309800	Microphthalmia, syndromic	non-classical monocyte	-0.655526	1	0.802	0.992	0
PS309800	Microphthalmia, syndromic	lymphocyte	0.397604	1	0.168	0.5264	0
PS309800	Microphthalmia, syndromic	myofibroblast cell	0.752675	1	0.163	0.5264	0
PS309800	Microphthalmia, syndromic	fibroblast	-0.0532767	1	0.563	0.931778	0
PS309800	Microphthalmia, syndromic	fibroblast.1	0.0445322	1	0.302	0.704667	0
312870	Simpson-golabi-behmel Syndrome, Type 1	ciliated epithelial cell	-0.347045	1	0.683	0.772154	0
312870	Simpson-golabi-behmel Syndrome, Type 1	pulmonary ionocyte; type II pneumocyte	-0.353495	1	0.56	0.772154	0
312870	Simpson-golabi-behmel Syndrome, Type 1	pulmonary artery endothelial cell	-0.358252	1	0.778	0.778	0
312870	Simpson-golabi-behmel Syndrome, Type 1	capillary endothelial cell	-0.298256	1	0.669	0.772154	0
312870	Simpson-golabi-behmel Syndrome, Type 1	pericyte cell	-0.318077	1	0.604	0.772154	0
312870	Simpson-golabi-behmel Syndrome, Type 1	B cell	-0.384554	1	0.561	0.772154	0
312870	Simpson-golabi-behmel Syndrome, Type 1	neutrophil	-0.411299	1	0.516	0.772154	0
312870	Simpson-golabi-behmel Syndrome, Type 1	alveolar macrophage	-0.398645	1	0.717	0.772154	0
312870	Simpson-golabi-behmel Syndrome, Type 1	classical monocyte	-0.393717	1	0.623	0.772154	0
312870	Simpson-golabi-behmel Syndrome, Type 1	non-classical monocyte	-0.379915	1	0.585	0.772154	0
312870	Simpson-golabi-behmel Syndrome, Type 1	lymphocyte	-0.364227	1	0.674	0.772154	0
312870	Simpson-golabi-behmel Syndrome, Type 1	myofibroblast cell	-0.385325	1	0.709	0.772154	0
312870	Simpson-golabi-behmel Syndrome, Type 1	fibroblast	1.266	1	0.074	0.518	0
312870	Simpson-golabi-behmel Syndrome, Type 1	fibroblast.1	3.12681	1	0.006	0.084	1
600802	Scid, Autosomal Recessive, T-negative/b-positive Type	ciliated epithelial cell	-0.377241	1	0.717	0.94	0
600802	Scid, Autosomal Recessive, T-negative/b-positive Type	pulmonary ionocyte; type II pneumocyte	-0.476968	1	0.687	0.94	0
600802	Scid, Autosomal Recessive, T-negative/b-positive Type	pulmonary artery endothelial cell	0.771465	1	0.169	0.5915	0
600802	Scid, Autosomal Recessive, T-negative/b-positive Type	capillary endothelial cell	2.47946	1	0.029	0.359333	0
600802	Scid, Autosomal Recessive, T-negative/b-positive Type	pericyte cell	-0.809499	1	0.846	0.94	0
600802	Scid, Autosomal Recessive, T-negative/b-positive Type	B cell	1.09058	1	0.077	0.359333	0
600802	Scid, Autosomal Recessive, T-negative/b-positive Type	neutrophil	-0.809499	1	0.703	0.94	0
600802	Scid, Autosomal Recessive, T-negative/b-positive Type	alveolar macrophage	-0.519437	1	0.824	0.94	0
600802	Scid, Autosomal Recessive, T-negative/b-positive Type	classical monocyte	-0.176402	1	0.44	0.94	0
600802	Scid, Autosomal Recessive, T-negative/b-positive Type	non-classical monocyte	-0.193152	1	0.449	0.94	0
600802	Scid, Autosomal Recessive, T-negative/b-positive Type	lymphocyte	1.20389	1	0.067	0.359333	0
600802	Scid, Autosomal Recessive, T-negative/b-positive Type	myofibroblast cell	-0.809499	1	0.924	0.94	0
600802	Scid, Autosomal Recessive, T-negative/b-positive Type	fibroblast	-0.66529	1	0.918	0.94	0
600802	Scid, Autosomal Recessive, T-negative/b-positive Type	fibroblast.1	-0.708418	1	0.94	0.94	0
601200	Pleuropulmonary Blastoma	ciliated epithelial cell	0.282695	1	0.337	0.674	0
601200	Pleuropulmonary Blastoma	pulmonary ionocyte; type II pneumocyte	0.441528	1	0.109	0.5635	0
601200	Pleuropulmonary Blastoma	pulmonary artery endothelial cell	-1.0735	1	0.991	0.991	0
601200	Pleuropulmonary Blastoma	capillary endothelial cell	-0.533429	1	0.818	0.954333	0
601200	Pleuropulmonary Blastoma	pericyte cell	2.55473	1	0.051	0.5635	0
601200	Pleuropulmonary Blastoma	B cell	-0.603061	1	0.717	0.912545	0
601200	Pleuropulmonary Blastoma	neutrophil	-1.85079	1	0.963	0.991	0
601200	Pleuropulmonary Blastoma	alveolar macrophage	0.0591329	1	0.27	0.634667	0
601200	Pleuropulmonary Blastoma	classical monocyte	-0.269333	1	0.49	0.7294	0
601200	Pleuropulmonary Blastoma	non-classical monocyte	-0.282134	1	0.513	0.7294	0
601200	Pleuropulmonary Blastoma	lymphocyte	0.354539	1	0.161	0.5635	0
601200	Pleuropulmonary Blastoma	myofibroblast cell	0.789281	1	0.145	0.5635	0
601200	Pleuropulmonary Blastoma	fibroblast	0.237805	1	0.272	0.634667	0
601200	Pleuropulmonary Blastoma	fibroblast.1	-0.107463	1	0.521	0.7294	0
602450	Severe Combined Immunodeficiency With Sensitivity To Ionizing Radiation	ciliated epithelial cell	-0.986789	1	0.942	0.987	0
602450	Severe Combined Immunodeficiency With Sensitivity To Ionizing Radiation	pulmonary ionocyte; type II pneumocyte	-0.476406	1	0.677	0.9478	0
602450	Severe Combined Immunodeficiency With Sensitivity To Ionizing Radiation	pulmonary artery endothelial cell	-0.135627	1	0.585	0.91	0
602450	Severe Combined Immunodeficiency With Sensitivity To Ionizing Radiation	capillary endothelial cell	0.773662	1	0.239	0.585667	0
602450	Severe Combined Immunodeficiency With Sensitivity To Ionizing Radiation	pericyte cell	-1.47487	1	0.965	0.987	0
602450	Severe Combined Immunodeficiency With Sensitivity To Ionizing Radiation	B cell	-0.360644	1	0.537	0.91	0
602450	Severe Combined Immunodeficiency With Sensitivity To Ionizing Radiation	neutrophil	1.25163	1	0.071	0.497	0
602450	Severe Combined Immunodeficiency With Sensitivity To Ionizing Radiation	alveolar macrophage	0.134969	1	0.25	0.585667	0
602450	Severe Combined Immunodeficiency With Sensitivity To Ionizing Radiation	classical monocyte	2.39519	1	0.007	0.098	1
602450	Severe Combined Immunodeficiency With Sensitivity To Ionizing Radiation	non-classical monocyte	0.437668	1	0.122	0.569333	0
602450	Severe Combined Immunodeficiency With Sensitivity To Ionizing Radiation	lymphocyte	0.0652784	1	0.251	0.585667	0
602450	Severe Combined Immunodeficiency With Sensitivity To Ionizing Radiation	myofibroblast cell	-0.151164	1	0.565	0.91	0
602450	Severe Combined Immunodeficiency With Sensitivity To Ionizing Radiation	fibroblast	-0.381572	1	0.787	0.987	0
602450	Severe Combined Immunodeficiency With Sensitivity To Ionizing Radiation	fibroblast.1	-1.09133	1	0.987	0.987	0
602535	Marshall-smith Syndrome	ciliated epithelial cell	0.642823	1	0.272	0.660333	0
602535	Marshall-smith Syndrome	pulmonary ionocyte; type II pneumocyte	0.402671	1	0.142	0.497	0
602535	Marshall-smith Syndrome	pulmonary artery endothelial cell	-0.3844	1	0.791	0.981	0
602535	Marshall-smith Syndrome	capillary endothelial cell	-0.730919	1	0.899	0.981	0
602535	Marshall-smith Syndrome	pericyte cell	-0.710288	1	0.81	0.981	0
602535	Marshall-smith Syndrome	B cell	-1.08114	1	0.922	0.981	0
602535	Marshall-smith Syndrome	neutrophil	-0.79851	1	0.732	0.981	0
602535	Marshall-smith Syndrome	alveolar macrophage	0.0979955	1	0.283	0.660333	0
602535	Marshall-smith Syndrome	classical monocyte	-0.548209	1	0.749	0.981	0
602535	Marshall-smith Syndrome	non-classical monocyte	-0.590038	1	0.762	0.981	0
602535	Marshall-smith Syndrome	lymphocyte	-1.04411	1	0.981	0.981	0
602535	Marshall-smith Syndrome	myofibroblast cell	1.74961	1	0.034	0.28	0
602535	Marshall-smith Syndrome	fibroblast	1.23411	1	0.06	0.28	0
602535	Marshall-smith Syndrome	fibroblast.1	1.76041	1	0.044	0.28	0
603554	Omenn Syndrome	ciliated epithelial cell	-0.986789	1	0.935	0.986	0
603554	Omenn Syndrome	pulmonary ionocyte; type II pneumocyte	-0.476406	1	0.659	0.9226	0
603554	Omenn Syndrome	pulmonary artery endothelial cell	-0.135627	1	0.597	0.9226	0
603554	Omenn Syndrome	capillary endothelial cell	0.773662	1	0.191	0.581	0
603554	Omenn Syndrome	pericyte cell	-1.47487	1	0.976	0.986	0
603554	Omenn Syndrome	B cell	-0.360644	1	0.527	0.9226	0
603554	Omenn Syndrome	neutrophil	1.25163	1	0.066	0.462	0
603554	Omenn Syndrome	alveolar macrophage	0.134969	1	0.249	0.581	0
603554	Omenn Syndrome	classical monocyte	2.39519	1	0.002	0.028	1
603554	Omenn Syndrome	non-classical monocyte	0.437668	1	0.127	0.581	0
603554	Omenn Syndrome	lymphocyte	0.0652784	1	0.231	0.581	0
603554	Omenn Syndrome	myofibroblast cell	-0.151164	1	0.548	0.9226	0
603554	Omenn Syndrome	fibroblast	-0.381572	1	0.773	0.983818	0
603554	Omenn Syndrome	fibroblast.1	-1.09133	1	0.986	0.986	0
604571	Bare Lymphocyte Syndrome, Type I	ciliated epithelial cell	-1.13792	3	0.996	0.996	0
604571	Bare Lymphocyte Syndrome, Type I	pulmonary ionocyte; type II pneumocyte	-1.09647	3	0.991	0.996	0
604571	Bare Lymphocyte Syndrome, Type I	pulmonary artery endothelial cell	1.70139	3	0.006	0.084	1
604571	Bare Lymphocyte Syndrome, Type I	capillary endothelial cell	0.908218	3	0.081	0.2268	0
604571	Bare Lymphocyte Syndrome, Type I	pericyte cell	0.264808	3	0.205	0.478333	0
604571	Bare Lymphocyte Syndrome, Type I	B cell	0.346992	3	0.052	0.182	0
604571	Bare Lymphocyte Syndrome, Type I	neutrophil	-0.16298	3	0.349	0.698	0
604571	Bare Lymphocyte Syndrome, Type I	alveolar macrophage	-0.195113	3	0.572	0.950444	0
604571	Bare Lymphocyte Syndrome, Type I	classical monocyte	0.301231	3	0.045	0.182	0
604571	Bare Lymphocyte Syndrome, Type I	non-classical monocyte	-0.315837	3	0.611	0.950444	0
604571	Bare Lymphocyte Syndrome, Type I	lymphocyte	0.551273	3	0.046	0.182	0
604571	Bare Lymphocyte Syndrome, Type I	myofibroblast cell	-0.451042	3	0.869	0.996	0
604571	Bare Lymphocyte Syndrome, Type I	fibroblast	-0.636155	3	0.974	0.996	0
604571	Bare Lymphocyte Syndrome, Type I	fibroblast.1	-0.516896	3	0.933	0.996	0
606690	Lymphangioleiomyomatosis	ciliated epithelial cell	-0.588678	1	0.793	0.869	0
606690	Lymphangioleiomyomatosis	pulmonary ionocyte; type II pneumocyte	-0.0808294	1	0.421	0.869	0
606690	Lymphangioleiomyomatosis	pulmonary artery endothelial cell	0.681083	1	0.161	0.751333	0
606690	Lymphangioleiomyomatosis	capillary endothelial cell	-0.628505	1	0.857	0.869	0
606690	Lymphangioleiomyomatosis	pericyte cell	2.56229	1	0.045	0.315	0
606690	Lymphangioleiomyomatosis	B cell	-0.894333	1	0.869	0.869	0
606690	Lymphangioleiomyomatosis	neutrophil	-0.894333	1	0.751	0.869	0
606690	Lymphangioleiomyomatosis	alveolar macrophage	-0.136199	1	0.522	0.869	0
606690	Lymphangioleiomyomatosis	classical monocyte	-0.521261	1	0.738	0.869	0
606690	Lymphangioleiomyomatosis	non-classical monocyte	-0.733398	1	0.822	0.869	0
606690	Lymphangioleiomyomatosis	lymphocyte	-0.605383	1	0.839	0.869	0
606690	Lymphangioleiomyomatosis	myofibroblast cell	0.00213533	1	0.338	0.869	0
606690	Lymphangioleiomyomatosis	fibroblast	1.52714	1	0.045	0.315	0
606690	Lymphangioleiomyomatosis	fibroblast.1	0.310271	1	0.215	0.7525	0
607271	Autoimmune Lymphoproliferative Syndrome, Type Iib	ciliated epithelial cell	-0.790138	1	0.913	0.973	0
607271	Autoimmune Lymphoproliferative Syndrome, Type Iib	pulmonary ionocyte; type II pneumocyte	-0.864161	1	0.892	0.973	0
607271	Autoimmune Lymphoproliferative Syndrome, Type Iib	pulmonary artery endothelial cell	1.37123	1	0.08	0.301	0
607271	Autoimmune Lymphoproliferative Syndrome, Type Iib	capillary endothelial cell	-0.129546	1	0.57	0.973	0
607271	Autoimmune Lymphoproliferative Syndrome, Type Iib	pericyte cell	-1.11	1	0.932	0.973	0
607271	Autoimmune Lymphoproliferative Syndrome, Type Iib	B cell	0.1406	1	0.153	0.357	0
607271	Autoimmune Lymphoproliferative Syndrome, Type Iib	neutrophil	0.352012	1	0.138	0.357	0
607271	Autoimmune Lymphoproliferative Syndrome, Type Iib	alveolar macrophage	2.06757	1	0.052	0.301	0
607271	Autoimmune Lymphoproliferative Syndrome, Type Iib	classical monocyte	0.635731	1	0.072	0.301	0
607271	Autoimmune Lymphoproliferative Syndrome, Type Iib	non-classical monocyte	0.0719076	1	0.188	0.376	0
607271	Autoimmune Lymphoproliferative Syndrome, Type Iib	lymphocyte	1.03645	1	0.086	0.301	0
607271	Autoimmune Lymphoproliferative Syndrome, Type Iib	myofibroblast cell	-1.03281	1	0.973	0.973	0
607271	Autoimmune Lymphoproliferative Syndrome, Type Iib	fibroblast	-0.844832	1	0.971	0.973	0
607271	Autoimmune Lymphoproliferative Syndrome, Type Iib	fibroblast.1	-0.904014	1	0.971	0.973	0
607616	Niemann-pick Disease, Type B	ciliated epithelial cell	1.05106	1	0.235	0.548333	0
607616	Niemann-pick Disease, Type B	pulmonary ionocyte; type II pneumocyte	0.611654	1	0.085	0.504	0
607616	Niemann-pick Disease, Type B	pulmonary artery endothelial cell	-0.0416742	1	0.567	0.882	0
607616	Niemann-pick Disease, Type B	capillary endothelial cell	1.08844	1	0.144	0.504	0
607616	Niemann-pick Disease, Type B	pericyte cell	-1.06239	1	0.928	0.974	0
607616	Niemann-pick Disease, Type B	B cell	-0.669497	1	0.779	0.974	0
607616	Niemann-pick Disease, Type B	neutrophil	-1.44404	1	0.912	0.974	0
607616	Niemann-pick Disease, Type B	alveolar macrophage	-0.93793	1	0.974	0.974	0
607616	Niemann-pick Disease, Type B	classical monocyte	-1.05922	1	0.974	0.974	0
607616	Niemann-pick Disease, Type B	non-classical monocyte	-0.23103	1	0.447	0.882	0
607616	Niemann-pick Disease, Type B	lymphocyte	0.0435784	1	0.227	0.548333	0
607616	Niemann-pick Disease, Type B	myofibroblast cell	-0.0462857	1	0.542	0.882	0
607616	Niemann-pick Disease, Type B	fibroblast	2.04713	1	0.029	0.406	0
607616	Niemann-pick Disease, Type B	fibroblast.1	0.650195	1	0.121	0.504	0
608022	Diaphanospondylodysostosis	ciliated epithelial cell	-0.466059	1	0.769	0.769	0
608022	Diaphanospondylodysostosis	pulmonary ionocyte; type II pneumocyte	-0.466059	1	0.648	0.769	0
608022	Diaphanospondylodysostosis	pulmonary artery endothelial cell	-0.279082	1	0.692	0.769	0
608022	Diaphanospondylodysostosis	capillary endothelial cell	-0.206292	1	0.602	0.769	0
608022	Diaphanospondylodysostosis	pericyte cell	1.31796	1	0.145	0.769	0
608022	Diaphanospondylodysostosis	B cell	-0.466059	1	0.653	0.769	0
608022	Diaphanospondylodysostosis	neutrophil	-0.466059	1	0.537	0.769	0
608022	Diaphanospondylodysostosis	alveolar macrophage	-0.383252	1	0.7	0.769	0
608022	Diaphanospondylodysostosis	classical monocyte	-0.466059	1	0.702	0.769	0
608022	Diaphanospondylodysostosis	non-classical monocyte	-0.466059	1	0.671	0.769	0
608022	Diaphanospondylodysostosis	lymphocyte	-0.466059	1	0.735	0.769	0
608022	Diaphanospondylodysostosis	myofibroblast cell	0.143413	1	0.299	0.769	0
608022	Diaphanospondylodysostosis	fibroblast	3.05109	1	0.007	0.098	1
608022	Diaphanospondylodysostosis	fibroblast.1	-0.381419	1	0.764	0.769	0
608971	Severe Combined Immunodeficiency, Autosomal Recessive, T Cell-negative,b Cell-positive, Nk Cell-positive	ciliated epithelial cell	-0.541198	2	0.895	0.942	0
608971	Severe Combined Immunodeficiency, Autosomal Recessive, T Cell-negative,b Cell-positive, Nk Cell-positive	pulmonary ionocyte; type II pneumocyte	-0.512646	2	0.747	0.942	0
608971	Severe Combined Immunodeficiency, Autosomal Recessive, T Cell-negative,b Cell-positive, Nk Cell-positive	pulmonary artery endothelial cell	-0.45455	2	0.926	0.942	0
608971	Severe Combined Immunodeficiency, Autosomal Recessive, T Cell-negative,b Cell-positive, Nk Cell-positive	capillary endothelial cell	-0.501241	2	0.885	0.942	0
608971	Severe Combined Immunodeficiency, Autosomal Recessive, T Cell-negative,b Cell-positive, Nk Cell-positive	pericyte cell	-0.553034	2	0.851	0.942	0
608971	Severe Combined Immunodeficiency, Autosomal Recessive, T Cell-negative,b Cell-positive, Nk Cell-positive	B cell	-0.130444	2	0.344	0.802667	0
608971	Severe Combined Immunodeficiency, Autosomal Recessive, T Cell-negative,b Cell-positive, Nk Cell-positive	neutrophil	0.587854	2	0.102	0.413	0
608971	Severe Combined Immunodeficiency, Autosomal Recessive, T Cell-negative,b Cell-positive, Nk Cell-positive	alveolar macrophage	0.202217	2	0.291	0.802667	0
608971	Severe Combined Immunodeficiency, Autosomal Recessive, T Cell-negative,b Cell-positive, Nk Cell-positive	classical monocyte	0.283448	2	0.118	0.413	0
608971	Severe Combined Immunodeficiency, Autosomal Recessive, T Cell-negative,b Cell-positive, Nk Cell-positive	non-classical monocyte	0.699176	2	0.081	0.413	0
608971	Severe Combined Immunodeficiency, Autosomal Recessive, T Cell-negative,b Cell-positive, Nk Cell-positive	lymphocyte	2.50451	2	0.002	0.028	1
608971	Severe Combined Immunodeficiency, Autosomal Recessive, T Cell-negative,b Cell-positive, Nk Cell-positive	myofibroblast cell	-0.537377	2	0.898	0.942	0
608971	Severe Combined Immunodeficiency, Autosomal Recessive, T Cell-negative,b Cell-positive, Nk Cell-positive	fibroblast	-0.512704	2	0.942	0.942	0
608971	Severe Combined Immunodeficiency, Autosomal Recessive, T Cell-negative,b Cell-positive, Nk Cell-positive	fibroblast.1	-0.534008	2	0.93	0.942	0
PS166200	Osteogenesis imperfecta	ciliated epithelial cell	-0.662437	2	0.93	0.96	0
PS166200	Osteogenesis imperfecta	pulmonary ionocyte; type II pneumocyte	-0.537117	2	0.79	0.96	0
PS166200	Osteogenesis imperfecta	pulmonary artery endothelial cell	-0.276126	2	0.79	0.96	0
PS166200	Osteogenesis imperfecta	capillary endothelial cell	-0.0355868	2	0.518	0.96	0
PS166200	Osteogenesis imperfecta	pericyte cell	1.6823	2	0.036	0.252	0
PS166200	Osteogenesis imperfecta	B cell	-0.522737	2	0.726	0.96	0
PS166200	Osteogenesis imperfecta	neutrophil	-0.763682	2	0.743	0.96	0
PS166200	Osteogenesis imperfecta	alveolar macrophage	-0.430363	2	0.812	0.96	0
PS166200	Osteogenesis imperfecta	classical monocyte	-0.733584	2	0.96	0.96	0
PS166200	Osteogenesis imperfecta	non-classical monocyte	-0.687554	2	0.898	0.96	0
PS166200	Osteogenesis imperfecta	lymphocyte	-0.6914	2	0.959	0.96	0
PS166200	Osteogenesis imperfecta	myofibroblast cell	0.453547	2	0.207	0.7245	0
PS166200	Osteogenesis imperfecta	fibroblast	0.967585	2	0.057	0.266	0
PS166200	Osteogenesis imperfecta	fibroblast.1	2.23716	2	0.002	0.028	1
610798	Immunodeficiency Due To Defect In Mapbp-interacting Protein	ciliated epithelial cell	1.53763	1	0.184	0.858667	0
610798	Immunodeficiency Due To Defect In Mapbp-interacting Protein	pulmonary ionocyte; type II pneumocyte	-0.28184	1	0.493	0.865	0
610798	Immunodeficiency Due To Defect In Mapbp-interacting Protein	pulmonary artery endothelial cell	-0.0485447	1	0.557	0.865	0
610798	Immunodeficiency Due To Defect In Mapbp-interacting Protein	capillary endothelial cell	-0.398209	1	0.736	0.865	0
610798	Immunodeficiency Due To Defect In Mapbp-interacting Protein	pericyte cell	-0.327268	1	0.638	0.865	0
610798	Immunodeficiency Due To Defect In Mapbp-interacting Protein	B cell	0.364902	1	0.164	0.858667	0
610798	Immunodeficiency Due To Defect In Mapbp-interacting Protein	neutrophil	-1.10845	1	0.814	0.865	0
610798	Immunodeficiency Due To Defect In Mapbp-interacting Protein	alveolar macrophage	2.77752	1	0.017	0.238	0
610798	Immunodeficiency Due To Defect In Mapbp-interacting Protein	classical monocyte	-0.317658	1	0.543	0.865	0
610798	Immunodeficiency Due To Defect In Mapbp-interacting Protein	non-classical monocyte	-0.585463	1	0.785	0.865	0
610798	Immunodeficiency Due To Defect In Mapbp-interacting Protein	lymphocyte	-0.143483	1	0.476	0.865	0
610798	Immunodeficiency Due To Defect In Mapbp-interacting Protein	myofibroblast cell	-0.561588	1	0.832	0.865	0
610798	Immunodeficiency Due To Defect In Mapbp-interacting Protein	fibroblast	-0.352885	1	0.768	0.865	0
610798	Immunodeficiency Due To Defect In Mapbp-interacting Protein	fibroblast.1	-0.554664	1	0.865	0.865	0
610978	Choreoathetosis, Hypothyroidism, And Neonatal Respiratory Distresschoreoathetosis And Congenital Hypothyroidism, Included	ciliated epithelial cell	0.915441	1	0.233	0.757	0
610978	Choreoathetosis, Hypothyroidism, And Neonatal Respiratory Distresschoreoathetosis And Congenital Hypothyroidism, Included	pulmonary ionocyte; type II pneumocyte	3.27074	1	0.013	0.182	0
610978	Choreoathetosis, Hypothyroidism, And Neonatal Respiratory Distresschoreoathetosis And Congenital Hypothyroidism, Included	pulmonary artery endothelial cell	-0.340864	1	0.736	0.757	0
610978	Choreoathetosis, Hypothyroidism, And Neonatal Respiratory Distresschoreoathetosis And Congenital Hypothyroidism, Included	capillary endothelial cell	-0.3334	1	0.707	0.757	0
610978	Choreoathetosis, Hypothyroidism, And Neonatal Respiratory Distresschoreoathetosis And Congenital Hypothyroidism, Included	pericyte cell	-0.363299	1	0.659	0.757	0
610978	Choreoathetosis, Hypothyroidism, And Neonatal Respiratory Distresschoreoathetosis And Congenital Hypothyroidism, Included	B cell	-0.363299	1	0.541	0.757	0
610978	Choreoathetosis, Hypothyroidism, And Neonatal Respiratory Distresschoreoathetosis And Congenital Hypothyroidism, Included	neutrophil	-0.363299	1	0.501	0.757	0
610978	Choreoathetosis, Hypothyroidism, And Neonatal Respiratory Distresschoreoathetosis And Congenital Hypothyroidism, Included	alveolar macrophage	-0.35302	1	0.688	0.757	0
610978	Choreoathetosis, Hypothyroidism, And Neonatal Respiratory Distresschoreoathetosis And Congenital Hypothyroidism, Included	classical monocyte	-0.363299	1	0.62	0.757	0
610978	Choreoathetosis, Hypothyroidism, And Neonatal Respiratory Distresschoreoathetosis And Congenital Hypothyroidism, Included	non-classical monocyte	-0.336659	1	0.598	0.757	0
610978	Choreoathetosis, Hypothyroidism, And Neonatal Respiratory Distresschoreoathetosis And Congenital Hypothyroidism, Included	lymphocyte	-0.354495	1	0.624	0.757	0
610978	Choreoathetosis, Hypothyroidism, And Neonatal Respiratory Distresschoreoathetosis And Congenital Hypothyroidism, Included	myofibroblast cell	-0.363299	1	0.714	0.757	0
610978	Choreoathetosis, Hypothyroidism, And Neonatal Respiratory Distresschoreoathetosis And Congenital Hypothyroidism, Included	fibroblast	-0.300406	1	0.74	0.757	0
610978	Choreoathetosis, Hypothyroidism, And Neonatal Respiratory Distresschoreoathetosis And Congenital Hypothyroidism, Included	fibroblast.1	-0.350842	1	0.757	0.757	0
611812	46,xx Sex Reversal With Dysgenesis Of Kidneys, Adrenals, And Lungs	ciliated epithelial cell	0.935769	1	0.22	0.777	0
611812	46,xx Sex Reversal With Dysgenesis Of Kidneys, Adrenals, And Lungs	pulmonary ionocyte; type II pneumocyte	-0.40701	1	0.631	0.777	0
611812	46,xx Sex Reversal With Dysgenesis Of Kidneys, Adrenals, And Lungs	pulmonary artery endothelial cell	-0.34077	1	0.777	0.777	0
611812	46,xx Sex Reversal With Dysgenesis Of Kidneys, Adrenals, And Lungs	capillary endothelial cell	-0.420294	1	0.769	0.777	0
611812	46,xx Sex Reversal With Dysgenesis Of Kidneys, Adrenals, And Lungs	pericyte cell	3.24827	1	0.012	0.168	0
611812	46,xx Sex Reversal With Dysgenesis Of Kidneys, Adrenals, And Lungs	B cell	-0.36509	1	0.548	0.777	0
611812	46,xx Sex Reversal With Dysgenesis Of Kidneys, Adrenals, And Lungs	neutrophil	-0.112869	1	0.4	0.777	0
611812	46,xx Sex Reversal With Dysgenesis Of Kidneys, Adrenals, And Lungs	alveolar macrophage	-0.402104	1	0.733	0.777	0
611812	46,xx Sex Reversal With Dysgenesis Of Kidneys, Adrenals, And Lungs	classical monocyte	-0.420294	1	0.663	0.777	0
611812	46,xx Sex Reversal With Dysgenesis Of Kidneys, Adrenals, And Lungs	non-classical monocyte	-0.310037	1	0.543	0.777	0
611812	46,xx Sex Reversal With Dysgenesis Of Kidneys, Adrenals, And Lungs	lymphocyte	-0.420294	1	0.685	0.777	0
611812	46,xx Sex Reversal With Dysgenesis Of Kidneys, Adrenals, And Lungs	myofibroblast cell	-0.420294	1	0.76	0.777	0
611812	46,xx Sex Reversal With Dysgenesis Of Kidneys, Adrenals, And Lungs	fibroblast	-0.179356	1	0.618	0.777	0
611812	46,xx Sex Reversal With Dysgenesis Of Kidneys, Adrenals, And Lungs	fibroblast.1	-0.385623	1	0.77	0.777	0
611943	Riddle Syndrome	ciliated epithelial cell	1.09649	1	0.188	0.498	0
611943	Riddle Syndrome	pulmonary ionocyte; type II pneumocyte	-0.702102	1	0.786	0.971	0
611943	Riddle Syndrome	pulmonary artery endothelial cell	-0.68874	1	0.949	0.971	0
611943	Riddle Syndrome	capillary endothelial cell	0.575984	1	0.249	0.498	0
611943	Riddle Syndrome	pericyte cell	2.32676	1	0.062	0.498	0
611943	Riddle Syndrome	B cell	0.477848	1	0.15	0.498	0
611943	Riddle Syndrome	neutrophil	-1.49316	1	0.915	0.971	0
611943	Riddle Syndrome	alveolar macrophage	0.530723	1	0.204	0.498	0
611943	Riddle Syndrome	classical monocyte	-0.502225	1	0.735	0.971	0
611943	Riddle Syndrome	non-classical monocyte	-0.521392	1	0.721	0.971	0
611943	Riddle Syndrome	lymphocyte	-0.588507	1	0.82	0.971	0
611943	Riddle Syndrome	myofibroblast cell	-1.13205	1	0.971	0.971	0
611943	Riddle Syndrome	fibroblast	0.331418	1	0.195	0.498	0
611943	Riddle Syndrome	fibroblast.1	0.288961	1	0.227	0.498	0
PS300291	Ectodermal dysplasia and immune deficiency	ciliated epithelial cell	-1.06997	1	0.974	0.974	0
PS300291	Ectodermal dysplasia and immune deficiency	pulmonary ionocyte; type II pneumocyte	-1.15494	1	0.948	0.974	0
PS300291	Ectodermal dysplasia and immune deficiency	pulmonary artery endothelial cell	1.35831	1	0.084	0.3815	0
PS300291	Ectodermal dysplasia and immune deficiency	capillary endothelial cell	1.2376	1	0.155	0.434	0
PS300291	Ectodermal dysplasia and immune deficiency	pericyte cell	-0.361731	1	0.682	0.974	0
PS300291	Ectodermal dysplasia and immune deficiency	B cell	-0.762811	1	0.805	0.974	0
PS300291	Ectodermal dysplasia and immune deficiency	neutrophil	1.79216	1	0.044	0.371	0
PS300291	Ectodermal dysplasia and immune deficiency	alveolar macrophage	-0.779185	1	0.93	0.974	0
PS300291	Ectodermal dysplasia and immune deficiency	classical monocyte	0.454918	1	0.109	0.3815	0
PS300291	Ectodermal dysplasia and immune deficiency	non-classical monocyte	1.17523	1	0.053	0.371	0
PS300291	Ectodermal dysplasia and immune deficiency	lymphocyte	-0.333946	1	0.604	0.974	0
PS300291	Ectodermal dysplasia and immune deficiency	myofibroblast cell	-0.252781	1	0.615	0.974	0
PS300291	Ectodermal dysplasia and immune deficiency	fibroblast	-0.633226	1	0.922	0.974	0
PS300291	Ectodermal dysplasia and immune deficiency	fibroblast.1	-0.669631	1	0.908	0.974	0
612289	Fontaine Progeroid Syndrome	ciliated epithelial cell	1.41581	1	0.183	0.5124	0
612289	Fontaine Progeroid Syndrome	pulmonary ionocyte; type II pneumocyte	-0.908679	1	0.898	0.981	0
612289	Fontaine Progeroid Syndrome	pulmonary artery endothelial cell	0.253268	1	0.28	0.612	0
612289	Fontaine Progeroid Syndrome	capillary endothelial cell	-1.01336	1	0.961	0.981	0
612289	Fontaine Progeroid Syndrome	pericyte cell	1.28042	1	0.154	0.5124	0
612289	Fontaine Progeroid Syndrome	B cell	-1.3925	1	0.97	0.981	0
612289	Fontaine Progeroid Syndrome	neutrophil	-0.0118836	1	0.354	0.6195	0
612289	Fontaine Progeroid Syndrome	alveolar macrophage	0.945641	1	0.128	0.5124	0
612289	Fontaine Progeroid Syndrome	classical monocyte	-1.05643	1	0.971	0.981	0
612289	Fontaine Progeroid Syndrome	non-classical monocyte	-1.23774	1	0.981	0.981	0
612289	Fontaine Progeroid Syndrome	lymphocyte	0.571551	1	0.131	0.5124	0
612289	Fontaine Progeroid Syndrome	myofibroblast cell	0.0642487	1	0.306	0.612	0
612289	Fontaine Progeroid Syndrome	fibroblast	-0.173954	1	0.581	0.903778	0
612289	Fontaine Progeroid Syndrome	fibroblast.1	1.26362	1	0.07	0.5124	0
PS202700	Neutropenia, severe congenital	ciliated epithelial cell	2.04833	2	0.039	0.546	0
PS202700	Neutropenia, severe congenital	pulmonary ionocyte; type II pneumocyte	-0.652773	2	0.857	0.964	0
PS202700	Neutropenia, severe congenital	pulmonary artery endothelial cell	-0.298331	2	0.82	0.964	0
PS202700	Neutropenia, severe congenital	capillary endothelial cell	0.764792	2	0.159	0.6405	0
PS202700	Neutropenia, severe congenital	pericyte cell	0.919045	2	0.183	0.6405	0
PS202700	Neutropenia, severe congenital	B cell	0.41138	2	0.147	0.6405	0
PS202700	Neutropenia, severe congenital	neutrophil	-1.32742	2	0.964	0.964	0
PS202700	Neutropenia, severe congenital	alveolar macrophage	0.210105	2	0.284	0.662667	0
PS202700	Neutropenia, severe congenital	classical monocyte	-0.292543	2	0.569	0.964	0
PS202700	Neutropenia, severe congenital	non-classical monocyte	-0.773741	2	0.932	0.964	0
PS202700	Neutropenia, severe congenital	lymphocyte	-0.465334	2	0.801	0.964	0
PS202700	Neutropenia, severe congenital	myofibroblast cell	-0.434724	2	0.83	0.964	0
PS202700	Neutropenia, severe congenital	fibroblast	0.238019	2	0.279	0.662667	0
PS202700	Neutropenia, severe congenital	fibroblast.1	-0.346798	2	0.786	0.964	0
612852	Interleukin 1 Receptor Antagonist Deficiency	ciliated epithelial cell	-0.387729	1	0.688	0.792	0
612852	Interleukin 1 Receptor Antagonist Deficiency	pulmonary ionocyte; type II pneumocyte	-0.431593	1	0.659	0.792	0
612852	Interleukin 1 Receptor Antagonist Deficiency	pulmonary artery endothelial cell	-0.329956	1	0.761	0.792	0
612852	Interleukin 1 Receptor Antagonist Deficiency	capillary endothelial cell	-0.329007	1	0.693	0.792	0
612852	Interleukin 1 Receptor Antagonist Deficiency	pericyte cell	-0.431593	1	0.725	0.792	0
612852	Interleukin 1 Receptor Antagonist Deficiency	B cell	-0.431593	1	0.601	0.792	0
612852	Interleukin 1 Receptor Antagonist Deficiency	neutrophil	1.94097	1	0.047	0.329	0
612852	Interleukin 1 Receptor Antagonist Deficiency	alveolar macrophage	2.71967	1	0.023	0.322	0
612852	Interleukin 1 Receptor Antagonist Deficiency	classical monocyte	-0.354082	1	0.599	0.792	0
612852	Interleukin 1 Receptor Antagonist Deficiency	non-classical monocyte	-0.298053	1	0.526	0.792	0
612852	Interleukin 1 Receptor Antagonist Deficiency	lymphocyte	-0.431593	1	0.694	0.792	0
612852	Interleukin 1 Receptor Antagonist Deficiency	myofibroblast cell	-0.393977	1	0.718	0.792	0
612852	Interleukin 1 Receptor Antagonist Deficiency	fibroblast	-0.423058	1	0.792	0.792	0
612852	Interleukin 1 Receptor Antagonist Deficiency	fibroblast.1	-0.418408	1	0.773	0.792	0
613179	Immunodeficiency Due To Purine Nucleoside Phosphorylase Deficiency	ciliated epithelial cell	0.193525	1	0.36	0.72	0
613179	Immunodeficiency Due To Purine Nucleoside Phosphorylase Deficiency	pulmonary ionocyte; type II pneumocyte	-0.986298	1	0.927	0.986	0
613179	Immunodeficiency Due To Purine Nucleoside Phosphorylase Deficiency	pulmonary artery endothelial cell	-0.102404	1	0.586	0.986	0
613179	Immunodeficiency Due To Purine Nucleoside Phosphorylase Deficiency	capillary endothelial cell	0.0599126	1	0.329	0.72	0
613179	Immunodeficiency Due To Purine Nucleoside Phosphorylase Deficiency	pericyte cell	-0.927734	1	0.899	0.986	0
613179	Immunodeficiency Due To Purine Nucleoside Phosphorylase Deficiency	B cell	-1.5344	1	0.986	0.986	0
613179	Immunodeficiency Due To Purine Nucleoside Phosphorylase Deficiency	neutrophil	-0.668748	1	0.655	0.986	0
613179	Immunodeficiency Due To Purine Nucleoside Phosphorylase Deficiency	alveolar macrophage	1.24931	1	0.099	0.3675	0
613179	Immunodeficiency Due To Purine Nucleoside Phosphorylase Deficiency	classical monocyte	1.85489	1	0.008	0.112	0
613179	Immunodeficiency Due To Purine Nucleoside Phosphorylase Deficiency	non-classical monocyte	-0.546078	1	0.74	0.986	0
613179	Immunodeficiency Due To Purine Nucleoside Phosphorylase Deficiency	lymphocyte	-0.961768	1	0.965	0.986	0
613179	Immunodeficiency Due To Purine Nucleoside Phosphorylase Deficiency	myofibroblast cell	1.07093	1	0.103	0.3675	0
613179	Immunodeficiency Due To Purine Nucleoside Phosphorylase Deficiency	fibroblast	0.871239	1	0.105	0.3675	0
613179	Immunodeficiency Due To Purine Nucleoside Phosphorylase Deficiency	fibroblast.1	0.427614	1	0.206	0.5768	0
613385	Autoimmune Disease, Multisystem, With Facial Dysmorphism	ciliated epithelial cell	-1.06917	1	0.969	0.999	0
613385	Autoimmune Disease, Multisystem, With Facial Dysmorphism	pulmonary ionocyte; type II pneumocyte	-0.350176	1	0.563	0.716545	0
613385	Autoimmune Disease, Multisystem, With Facial Dysmorphism	pulmonary artery endothelial cell	0.390834	1	0.254	0.395111	0
613385	Autoimmune Disease, Multisystem, With Facial Dysmorphism	capillary endothelial cell	0.61224	1	0.235	0.395111	0
613385	Autoimmune Disease, Multisystem, With Facial Dysmorphism	pericyte cell	-2.45114	1	0.999	0.999	0
613385	Autoimmune Disease, Multisystem, With Facial Dysmorphism	B cell	0.0320197	1	0.193	0.395111	0
613385	Autoimmune Disease, Multisystem, With Facial Dysmorphism	neutrophil	0.32248	1	0.127	0.395111	0
613385	Autoimmune Disease, Multisystem, With Facial Dysmorphism	alveolar macrophage	-0.870632	1	0.963	0.999	0
613385	Autoimmune Disease, Multisystem, With Facial Dysmorphism	classical monocyte	1.25541	1	0.03	0.395111	0
613385	Autoimmune Disease, Multisystem, With Facial Dysmorphism	non-classical monocyte	0.371521	1	0.158	0.395111	0
613385	Autoimmune Disease, Multisystem, With Facial Dysmorphism	lymphocyte	0.0740267	1	0.239	0.395111	0
613385	Autoimmune Disease, Multisystem, With Facial Dysmorphism	myofibroblast cell	1.59549	1	0.063	0.395111	0
613385	Autoimmune Disease, Multisystem, With Facial Dysmorphism	fibroblast	0.226051	1	0.234	0.395111	0
613385	Autoimmune Disease, Multisystem, With Facial Dysmorphism	fibroblast.1	-0.138942	1	0.557	0.716545	0
613490	Alpha-1-antitrypsin Deficiency	ciliated epithelial cell	-0.431599	1	0.737	0.97	0
613490	Alpha-1-antitrypsin Deficiency	pulmonary ionocyte; type II pneumocyte	1.72533	1	0.045	0.219333	0
613490	Alpha-1-antitrypsin Deficiency	pulmonary artery endothelial cell	-0.869427	1	0.97	0.97	0
613490	Alpha-1-antitrypsin Deficiency	capillary endothelial cell	-0.869427	1	0.928	0.97	0
613490	Alpha-1-antitrypsin Deficiency	pericyte cell	-0.869427	1	0.882	0.97	0
613490	Alpha-1-antitrypsin Deficiency	B cell	-0.267392	1	0.456	0.97	0
613490	Alpha-1-antitrypsin Deficiency	neutrophil	-0.869427	1	0.75	0.97	0
613490	Alpha-1-antitrypsin Deficiency	alveolar macrophage	-0.694497	1	0.91	0.97	0
613490	Alpha-1-antitrypsin Deficiency	classical monocyte	-0.761876	1	0.869	0.97	0
613490	Alpha-1-antitrypsin Deficiency	non-classical monocyte	0.495207	1	0.116	0.406	0
613490	Alpha-1-antitrypsin Deficiency	lymphocyte	-0.110197	1	0.499	0.97	0
613490	Alpha-1-antitrypsin Deficiency	myofibroblast cell	0.248802	1	0.276	0.7728	0
613490	Alpha-1-antitrypsin Deficiency	fibroblast	1.62129	1	0.039	0.219333	0
613490	Alpha-1-antitrypsin Deficiency	fibroblast.1	1.65264	1	0.047	0.219333	0
PS613658	Rajab interstitial lung disease with brain calcifications	ciliated epithelial cell	-0.123574	2	0.604	0.931636	0
PS613658	Rajab interstitial lung disease with brain calcifications	pulmonary ionocyte; type II pneumocyte	-0.710324	2	0.879	0.971	0
PS613658	Rajab interstitial lung disease with brain calcifications	pulmonary artery endothelial cell	1.00288	2	0.086	0.602	0
PS613658	Rajab interstitial lung disease with brain calcifications	capillary endothelial cell	0.903732	2	0.143	0.667333	0
PS613658	Rajab interstitial lung disease with brain calcifications	pericyte cell	1.65964	2	0.042	0.588	0
PS613658	Rajab interstitial lung disease with brain calcifications	B cell	-0.157744	2	0.396	0.693	0
PS613658	Rajab interstitial lung disease with brain calcifications	neutrophil	-1.50964	2	0.971	0.971	0
PS613658	Rajab interstitial lung disease with brain calcifications	alveolar macrophage	0.06773	2	0.347	0.693	0
PS613658	Rajab interstitial lung disease with brain calcifications	classical monocyte	0.0306744	2	0.242	0.693	0
PS613658	Rajab interstitial lung disease with brain calcifications	non-classical monocyte	-0.817699	2	0.948	0.971	0
PS613658	Rajab interstitial lung disease with brain calcifications	lymphocyte	0.00832618	2	0.324	0.693	0
PS613658	Rajab interstitial lung disease with brain calcifications	myofibroblast cell	-0.294898	2	0.732	0.931636	0
PS613658	Rajab interstitial lung disease with brain calcifications	fibroblast	0.163491	2	0.345	0.693	0
PS613658	Rajab interstitial lung disease with brain calcifications	fibroblast.1	-0.222588	2	0.691	0.931636	0
PS224690	Meier-Gorlin syndrome	ciliated epithelial cell	-0.4506	3	0.851	0.986	0
PS224690	Meier-Gorlin syndrome	pulmonary ionocyte; type II pneumocyte	-0.407137	3	0.659	0.986	0
PS224690	Meier-Gorlin syndrome	pulmonary artery endothelial cell	-0.383178	3	0.889	0.986	0
PS224690	Meier-Gorlin syndrome	capillary endothelial cell	-0.0167465	3	0.552	0.986	0
PS224690	Meier-Gorlin syndrome	pericyte cell	-0.735469	3	0.936	0.986	0
PS224690	Meier-Gorlin syndrome	B cell	-0.0308026	3	0.351	0.9828	0
PS224690	Meier-Gorlin syndrome	neutrophil	-0.74329	3	0.763	0.986	0
PS224690	Meier-Gorlin syndrome	alveolar macrophage	1.30941	3	0.019	0.266	0
PS224690	Meier-Gorlin syndrome	classical monocyte	0.017738	3	0.095	0.443333	0
PS224690	Meier-Gorlin syndrome	non-classical monocyte	0.288009	3	0.064	0.443333	0
PS224690	Meier-Gorlin syndrome	lymphocyte	-0.205143	3	0.491	0.986	0
PS224690	Meier-Gorlin syndrome	myofibroblast cell	0.272225	3	0.169	0.5915	0
PS224690	Meier-Gorlin syndrome	fibroblast	-0.676078	3	0.986	0.986	0
PS224690	Meier-Gorlin syndrome	fibroblast.1	-0.539	3	0.954	0.986	0
PS614080	Multiple congenital anomalies-hypotonia-seizures syndrome	ciliated epithelial cell	0.169166	1	0.352	0.704	0
PS614080	Multiple congenital anomalies-hypotonia-seizures syndrome	pulmonary ionocyte; type II pneumocyte	1.56958	1	0.04	0.343	0
PS614080	Multiple congenital anomalies-hypotonia-seizures syndrome	pulmonary artery endothelial cell	-1.11452	1	0.99	0.99	0
PS614080	Multiple congenital anomalies-hypotonia-seizures syndrome	capillary endothelial cell	-1.4021	1	0.988	0.99	0
PS614080	Multiple congenital anomalies-hypotonia-seizures syndrome	pericyte cell	0.348574	1	0.28	0.704	0
PS614080	Multiple congenital anomalies-hypotonia-seizures syndrome	B cell	-0.424062	1	0.615	0.984667	0
PS614080	Multiple congenital anomalies-hypotonia-seizures syndrome	neutrophil	1.78867	1	0.049	0.343	0
PS614080	Multiple congenital anomalies-hypotonia-seizures syndrome	alveolar macrophage	0.135623	1	0.285	0.704	0
PS614080	Multiple congenital anomalies-hypotonia-seizures syndrome	classical monocyte	-1.01523	1	0.96	0.99	0
PS614080	Multiple congenital anomalies-hypotonia-seizures syndrome	non-classical monocyte	-0.536522	1	0.726	0.99	0
PS614080	Multiple congenital anomalies-hypotonia-seizures syndrome	lymphocyte	-0.682391	1	0.889	0.99	0
PS614080	Multiple congenital anomalies-hypotonia-seizures syndrome	myofibroblast cell	1.39054	1	0.085	0.396667	0
PS614080	Multiple congenital anomalies-hypotonia-seizures syndrome	fibroblast	0.0224784	1	0.307	0.704	0
PS614080	Multiple congenital anomalies-hypotonia-seizures syndrome	fibroblast.1	-0.249794	1	0.633	0.984667	0
PS218330	Cranioectodermal dysplasia	ciliated epithelial cell	3.45825	1	0.026	0.364	0
PS218330	Cranioectodermal dysplasia	pulmonary ionocyte; type II pneumocyte	-0.105049	1	0.43	0.693	0
PS218330	Cranioectodermal dysplasia	pulmonary artery endothelial cell	-0.166807	1	0.629	0.693	0
PS218330	Cranioectodermal dysplasia	capillary endothelial cell	-0.0483357	1	0.556	0.693	0
PS218330	Cranioectodermal dysplasia	pericyte cell	-0.328079	1	0.657	0.693	0
PS218330	Cranioectodermal dysplasia	B cell	-0.328079	1	0.544	0.693	0
PS218330	Cranioectodermal dysplasia	neutrophil	-0.328079	1	0.498	0.693	0
PS218330	Cranioectodermal dysplasia	alveolar macrophage	-0.328079	1	0.656	0.693	0
PS218330	Cranioectodermal dysplasia	classical monocyte	-0.328079	1	0.586	0.693	0
PS218330	Cranioectodermal dysplasia	non-classical monocyte	-0.328079	1	0.57	0.693	0
PS218330	Cranioectodermal dysplasia	lymphocyte	-0.328079	1	0.648	0.693	0
PS218330	Cranioectodermal dysplasia	myofibroblast cell	-0.328079	1	0.689	0.693	0
PS218330	Cranioectodermal dysplasia	fibroblast	-0.199996	1	0.606	0.693	0
PS218330	Cranioectodermal dysplasia	fibroblast.1	-0.31343	1	0.693	0.693	0
PS257300	Mosaic variegated aneuploidy syndrome	ciliated epithelial cell	2.20558	1	0.122	0.462	0
PS257300	Mosaic variegated aneuploidy syndrome	pulmonary ionocyte; type II pneumocyte	0.354307	1	0.132	0.462	0
PS257300	Mosaic variegated aneuploidy syndrome	pulmonary artery endothelial cell	1.10074	1	0.101	0.462	0
PS257300	Mosaic variegated aneuploidy syndrome	capillary endothelial cell	0.308453	1	0.289	0.553	0
PS257300	Mosaic variegated aneuploidy syndrome	pericyte cell	-1.50032	1	0.971	0.971	0
PS257300	Mosaic variegated aneuploidy syndrome	B cell	0.640341	1	0.097	0.462	0
PS257300	Mosaic variegated aneuploidy syndrome	neutrophil	-1.50032	1	0.928	0.971	0
PS257300	Mosaic variegated aneuploidy syndrome	alveolar macrophage	0.271082	1	0.198	0.518	0
PS257300	Mosaic variegated aneuploidy syndrome	classical monocyte	-0.0294746	1	0.402	0.625333	0
PS257300	Mosaic variegated aneuploidy syndrome	non-classical monocyte	-1.01429	1	0.948	0.971	0
PS257300	Mosaic variegated aneuploidy syndrome	lymphocyte	0.169456	1	0.222	0.518	0
PS257300	Mosaic variegated aneuploidy syndrome	myofibroblast cell	-0.277296	1	0.643	0.9002	0
PS257300	Mosaic variegated aneuploidy syndrome	fibroblast	0.0341401	1	0.316	0.553	0
PS257300	Mosaic variegated aneuploidy syndrome	fibroblast.1	-0.762393	1	0.933	0.971	0
PS114580	Familial candidiasis	ciliated epithelial cell	-0.782755	1	0.902	0.987	0
PS114580	Familial candidiasis	pulmonary ionocyte; type II pneumocyte	-0.922109	1	0.9	0.987	0
PS114580	Familial candidiasis	pulmonary artery endothelial cell	0.634548	1	0.187	0.6545	0
PS114580	Familial candidiasis	capillary endothelial cell	0.370204	1	0.262	0.7336	0
PS114580	Familial candidiasis	pericyte cell	-0.506758	1	0.779	0.987	0
PS114580	Familial candidiasis	B cell	-0.517552	1	0.669	0.987	0
PS114580	Familial candidiasis	neutrophil	2.65479	1	0.018	0.252	0
PS114580	Familial candidiasis	alveolar macrophage	-0.0988422	1	0.481	0.962	0
PS114580	Familial candidiasis	classical monocyte	0.958771	1	0.037	0.259	0
PS114580	Familial candidiasis	non-classical monocyte	0.643784	1	0.09	0.42	0
PS114580	Familial candidiasis	lymphocyte	-0.0955659	1	0.46	0.962	0
PS114580	Familial candidiasis	myofibroblast cell	-1.14125	1	0.987	0.987	0
PS114580	Familial candidiasis	fibroblast	-0.435936	1	0.837	0.987	0
PS114580	Familial candidiasis	fibroblast.1	-0.761336	1	0.939	0.987	0
614327	Tumor Predisposition Syndrome	ciliated epithelial cell	-0.579099	1	0.832	0.906	0
614327	Tumor Predisposition Syndrome	pulmonary ionocyte; type II pneumocyte	-0.778011	1	0.86	0.906	0
614327	Tumor Predisposition Syndrome	pulmonary artery endothelial cell	1.83419	1	0.03	0.301	0
614327	Tumor Predisposition Syndrome	capillary endothelial cell	2.41118	1	0.043	0.301	0
614327	Tumor Predisposition Syndrome	pericyte cell	0.207518	1	0.31	0.868	0
614327	Tumor Predisposition Syndrome	B cell	-0.276287	1	0.467	0.906	0
614327	Tumor Predisposition Syndrome	neutrophil	-1.2388	1	0.836	0.906	0
614327	Tumor Predisposition Syndrome	alveolar macrophage	-0.489088	1	0.813	0.906	0
614327	Tumor Predisposition Syndrome	classical monocyte	-0.809703	1	0.906	0.906	0
614327	Tumor Predisposition Syndrome	non-classical monocyte	0.272564	1	0.159	0.742	0
614327	Tumor Predisposition Syndrome	lymphocyte	0.151204	1	0.22	0.77	0
614327	Tumor Predisposition Syndrome	myofibroblast cell	-0.393614	1	0.761	0.906	0
614327	Tumor Predisposition Syndrome	fibroblast	-0.281856	1	0.711	0.906	0
614327	Tumor Predisposition Syndrome	fibroblast.1	-0.0301974	1	0.531	0.906	0
PS614742	Pulmonary fibrosis and/or bone marrow failure, telomere-related	ciliated epithelial cell	0.362195	2	0.439	0.923	0
PS614742	Pulmonary fibrosis and/or bone marrow failure, telomere-related	pulmonary ionocyte; type II pneumocyte	-0.61337	2	0.837	0.923	0
PS614742	Pulmonary fibrosis and/or bone marrow failure, telomere-related	pulmonary artery endothelial cell	0.184363	2	0.354	0.923	0
PS614742	Pulmonary fibrosis and/or bone marrow failure, telomere-related	capillary endothelial cell	-0.379025	2	0.824	0.923	0
PS614742	Pulmonary fibrosis and/or bone marrow failure, telomere-related	pericyte cell	-0.708641	2	0.885	0.923	0
PS614742	Pulmonary fibrosis and/or bone marrow failure, telomere-related	B cell	1.45745	2	0.015	0.105	0
PS614742	Pulmonary fibrosis and/or bone marrow failure, telomere-related	neutrophil	-0.276283	2	0.388	0.923	0
PS614742	Pulmonary fibrosis and/or bone marrow failure, telomere-related	alveolar macrophage	-0.165184	2	0.598	0.923	0
PS614742	Pulmonary fibrosis and/or bone marrow failure, telomere-related	classical monocyte	-0.676181	2	0.923	0.923	0
PS614742	Pulmonary fibrosis and/or bone marrow failure, telomere-related	non-classical monocyte	-0.423568	2	0.7	0.923	0
PS614742	Pulmonary fibrosis and/or bone marrow failure, telomere-related	lymphocyte	-0.413793	2	0.74	0.923	0
PS614742	Pulmonary fibrosis and/or bone marrow failure, telomere-related	myofibroblast cell	1.73221	2	0.013	0.105	0
PS614742	Pulmonary fibrosis and/or bone marrow failure, telomere-related	fibroblast	0.15362	2	0.32	0.923	0
PS614742	Pulmonary fibrosis and/or bone marrow failure, telomere-related	fibroblast.1	-0.233792	2	0.705	0.923	0
614748	Interstitial Lung Disease, Nephrotic Syndrome, And Epidermolysis Bullosa, Congenital	ciliated epithelial cell	0.300689	1	0.327	0.746	0
614748	Interstitial Lung Disease, Nephrotic Syndrome, And Epidermolysis Bullosa, Congenital	pulmonary ionocyte; type II pneumocyte	-0.116049	1	0.409	0.746	0
614748	Interstitial Lung Disease, Nephrotic Syndrome, And Epidermolysis Bullosa, Congenital	pulmonary artery endothelial cell	0.122589	1	0.327	0.746	0
614748	Interstitial Lung Disease, Nephrotic Syndrome, And Epidermolysis Bullosa, Congenital	capillary endothelial cell	3.39205	1	0.001	0.014	1
614748	Interstitial Lung Disease, Nephrotic Syndrome, And Epidermolysis Bullosa, Congenital	pericyte cell	-0.393536	1	0.673	0.746	0
614748	Interstitial Lung Disease, Nephrotic Syndrome, And Epidermolysis Bullosa, Congenital	B cell	-0.393536	1	0.56	0.746	0
614748	Interstitial Lung Disease, Nephrotic Syndrome, And Epidermolysis Bullosa, Congenital	neutrophil	-0.307048	1	0.46	0.746	0
614748	Interstitial Lung Disease, Nephrotic Syndrome, And Epidermolysis Bullosa, Congenital	alveolar macrophage	-0.380103	1	0.702	0.746	0
614748	Interstitial Lung Disease, Nephrotic Syndrome, And Epidermolysis Bullosa, Congenital	classical monocyte	-0.376459	1	0.618	0.746	0
614748	Interstitial Lung Disease, Nephrotic Syndrome, And Epidermolysis Bullosa, Congenital	non-classical monocyte	-0.373971	1	0.593	0.746	0
614748	Interstitial Lung Disease, Nephrotic Syndrome, And Epidermolysis Bullosa, Congenital	lymphocyte	-0.370084	1	0.661	0.746	0
614748	Interstitial Lung Disease, Nephrotic Syndrome, And Epidermolysis Bullosa, Congenital	myofibroblast cell	-0.393536	1	0.724	0.746	0
614748	Interstitial Lung Disease, Nephrotic Syndrome, And Epidermolysis Bullosa, Congenital	fibroblast	-0.341716	1	0.746	0.746	0
614748	Interstitial Lung Disease, Nephrotic Syndrome, And Epidermolysis Bullosa, Congenital	fibroblast.1	-0.369294	1	0.73	0.746	0
614878	Autoinflammation, Antibody Deficiency, And Immune Dysregulation, Plcg2-associated	ciliated epithelial cell	-0.668644	1	0.864	0.972	0
614878	Autoinflammation, Antibody Deficiency, And Immune Dysregulation, Plcg2-associated	pulmonary ionocyte; type II pneumocyte	-0.80728	1	0.86	0.972	0
614878	Autoinflammation, Antibody Deficiency, And Immune Dysregulation, Plcg2-associated	pulmonary artery endothelial cell	-0.601369	1	0.91	0.972	0
614878	Autoinflammation, Antibody Deficiency, And Immune Dysregulation, Plcg2-associated	capillary endothelial cell	-0.705339	1	0.904	0.972	0
614878	Autoinflammation, Antibody Deficiency, And Immune Dysregulation, Plcg2-associated	pericyte cell	-0.80728	1	0.886	0.972	0
614878	Autoinflammation, Antibody Deficiency, And Immune Dysregulation, Plcg2-associated	B cell	1.81618	1	0.041	0.200667	0
614878	Autoinflammation, Antibody Deficiency, And Immune Dysregulation, Plcg2-associated	neutrophil	0.439785	1	0.131	0.4585	0
614878	Autoinflammation, Antibody Deficiency, And Immune Dysregulation, Plcg2-associated	alveolar macrophage	0.635616	1	0.165	0.462	0
614878	Autoinflammation, Antibody Deficiency, And Immune Dysregulation, Plcg2-associated	classical monocyte	1.60434	1	0.021	0.200667	0
614878	Autoinflammation, Antibody Deficiency, And Immune Dysregulation, Plcg2-associated	non-classical monocyte	1.43028	1	0.043	0.200667	0
614878	Autoinflammation, Antibody Deficiency, And Immune Dysregulation, Plcg2-associated	lymphocyte	0.0342655	1	0.25	0.583333	0
614878	Autoinflammation, Antibody Deficiency, And Immune Dysregulation, Plcg2-associated	myofibroblast cell	-0.80728	1	0.919	0.972	0
614878	Autoinflammation, Antibody Deficiency, And Immune Dysregulation, Plcg2-associated	fibroblast	-0.777894	1	0.972	0.972	0
614878	Autoinflammation, Antibody Deficiency, And Immune Dysregulation, Plcg2-associated	fibroblast.1	-0.785382	1	0.948	0.972	0
PS604273	Mitochondrial complex V (ATP synthase) deficiency, nuclear type	ciliated epithelial cell	0.15871	1	0.343	0.533556	0
PS604273	Mitochondrial complex V (ATP synthase) deficiency, nuclear type	pulmonary ionocyte; type II pneumocyte	0.345429	1	0.135	0.441	0
PS604273	Mitochondrial complex V (ATP synthase) deficiency, nuclear type	pulmonary artery endothelial cell	0.18653	1	0.297	0.51975	0
PS604273	Mitochondrial complex V (ATP synthase) deficiency, nuclear type	capillary endothelial cell	0.454241	1	0.245	0.49	0
PS604273	Mitochondrial complex V (ATP synthase) deficiency, nuclear type	pericyte cell	1.01266	1	0.189	0.441	0
PS604273	Mitochondrial complex V (ATP synthase) deficiency, nuclear type	B cell	-0.330868	1	0.542	0.689818	0
PS604273	Mitochondrial complex V (ATP synthase) deficiency, nuclear type	neutrophil	-2.01698	1	0.981	0.999	0
PS604273	Mitochondrial complex V (ATP synthase) deficiency, nuclear type	alveolar macrophage	1.30752	1	0.091	0.441	0
PS604273	Mitochondrial complex V (ATP synthase) deficiency, nuclear type	classical monocyte	-0.0753846	1	0.408	0.5712	0
PS604273	Mitochondrial complex V (ATP synthase) deficiency, nuclear type	non-classical monocyte	0.325367	1	0.174	0.441	0
PS604273	Mitochondrial complex V (ATP synthase) deficiency, nuclear type	lymphocyte	0.899388	1	0.09	0.441	0
PS604273	Mitochondrial complex V (ATP synthase) deficiency, nuclear type	myofibroblast cell	0.577252	1	0.183	0.441	0
PS604273	Mitochondrial complex V (ATP synthase) deficiency, nuclear type	fibroblast	-0.972409	1	0.985	0.999	0
PS604273	Mitochondrial complex V (ATP synthase) deficiency, nuclear type	fibroblast.1	-1.87146	1	0.999	0.999	0
PS213300	Joubert syndrome	ciliated epithelial cell	3.41021	1	0.041	0.574	0
PS213300	Joubert syndrome	pulmonary ionocyte; type II pneumocyte	-0.380643	1	0.619	0.825	0
PS213300	Joubert syndrome	pulmonary artery endothelial cell	-0.259673	1	0.687	0.825	0
PS213300	Joubert syndrome	capillary endothelial cell	0.0260742	1	0.352	0.825	0
PS213300	Joubert syndrome	pericyte cell	-0.417508	1	0.731	0.825	0
PS213300	Joubert syndrome	B cell	-0.0224239	1	0.394	0.825	0
PS213300	Joubert syndrome	neutrophil	-0.195963	1	0.421	0.825	0
PS213300	Joubert syndrome	alveolar macrophage	-0.554047	1	0.825	0.825	0
PS213300	Joubert syndrome	classical monocyte	-0.535109	1	0.764	0.825	0
PS213300	Joubert syndrome	non-classical monocyte	-0.360574	1	0.603	0.825	0
PS213300	Joubert syndrome	lymphocyte	-0.108688	1	0.486	0.825	0
PS213300	Joubert syndrome	myofibroblast cell	-0.00820086	1	0.552	0.825	0
PS213300	Joubert syndrome	fibroblast	-0.168371	1	0.582	0.825	0
PS213300	Joubert syndrome	fibroblast.1	-0.425085	1	0.795	0.825	0
PS615952	Autoimmune disease, multisystem, infantile-onset	ciliated epithelial cell	-1.31292	1	0.985	0.985	0
PS615952	Autoimmune disease, multisystem, infantile-onset	pulmonary ionocyte; type II pneumocyte	0.280531	1	0.139	0.374	0
PS615952	Autoimmune disease, multisystem, infantile-onset	pulmonary artery endothelial cell	-0.571248	1	0.916	0.985	0
PS615952	Autoimmune disease, multisystem, infantile-onset	capillary endothelial cell	-0.565961	1	0.837	0.985	0
PS615952	Autoimmune disease, multisystem, infantile-onset	pericyte cell	1.08176	1	0.171	0.374	0
PS615952	Autoimmune disease, multisystem, infantile-onset	B cell	-1.26683	1	0.961	0.985	0
PS615952	Autoimmune disease, multisystem, infantile-onset	neutrophil	-1.31328	1	0.88	0.985	0
PS615952	Autoimmune disease, multisystem, infantile-onset	alveolar macrophage	0.588027	1	0.158	0.374	0
PS615952	Autoimmune disease, multisystem, infantile-onset	classical monocyte	-0.688219	1	0.846	0.985	0
PS615952	Autoimmune disease, multisystem, infantile-onset	non-classical monocyte	1.92076	1	0.015	0.21	0
PS615952	Autoimmune disease, multisystem, infantile-onset	lymphocyte	-0.187975	1	0.481	0.84175	0
PS615952	Autoimmune disease, multisystem, infantile-onset	myofibroblast cell	0.944218	1	0.118	0.374	0
PS615952	Autoimmune disease, multisystem, infantile-onset	fibroblast	0.646122	1	0.146	0.374	0
PS615952	Autoimmune disease, multisystem, infantile-onset	fibroblast.1	0.445007	1	0.187	0.374	0
PS209900	Bardet-Biedl syndrome	ciliated epithelial cell	3.18169	1	0.055	0.714	0
PS209900	Bardet-Biedl syndrome	pulmonary ionocyte; type II pneumocyte	-0.483069	1	0.679	0.838833	0
PS209900	Bardet-Biedl syndrome	pulmonary artery endothelial cell	-0.208491	1	0.609	0.838833	0
PS209900	Bardet-Biedl syndrome	capillary endothelial cell	-0.359665	1	0.719	0.838833	0
PS209900	Bardet-Biedl syndrome	pericyte cell	-0.824987	1	0.877	0.877	0
PS209900	Bardet-Biedl syndrome	B cell	-0.824987	1	0.826	0.877	0
PS209900	Bardet-Biedl syndrome	neutrophil	-0.824987	1	0.717	0.838833	0
PS209900	Bardet-Biedl syndrome	alveolar macrophage	0.0628327	1	0.288	0.8064	0
PS209900	Bardet-Biedl syndrome	classical monocyte	-0.0661156	1	0.403	0.838833	0
PS209900	Bardet-Biedl syndrome	non-classical monocyte	0.519319	1	0.102	0.714	0
PS209900	Bardet-Biedl syndrome	lymphocyte	0.0201735	1	0.241	0.8064	0
PS209900	Bardet-Biedl syndrome	myofibroblast cell	-0.208214	1	0.592	0.838833	0
PS209900	Bardet-Biedl syndrome	fibroblast	-0.223014	1	0.642	0.838833	0
PS209900	Bardet-Biedl syndrome	fibroblast.1	0.239518	1	0.228	0.8064	0
PS614328	Neonatal inflammatory skin and bowel disease	ciliated epithelial cell	-0.320308	1	0.663	0.847	0
PS614328	Neonatal inflammatory skin and bowel disease	pulmonary ionocyte; type II pneumocyte	0.191438	1	0.137	0.4795	0
PS614328	Neonatal inflammatory skin and bowel disease	pulmonary artery endothelial cell	-0.47304	1	0.847	0.847	0
PS614328	Neonatal inflammatory skin and bowel disease	capillary endothelial cell	-0.554605	1	0.816	0.847	0
PS614328	Neonatal inflammatory skin and bowel disease	pericyte cell	-0.554605	1	0.787	0.847	0
PS614328	Neonatal inflammatory skin and bowel disease	B cell	-0.554605	1	0.706	0.847	0
PS614328	Neonatal inflammatory skin and bowel disease	neutrophil	-0.554605	1	0.613	0.847	0
PS614328	Neonatal inflammatory skin and bowel disease	alveolar macrophage	-0.47706	1	0.78	0.847	0
PS614328	Neonatal inflammatory skin and bowel disease	classical monocyte	-0.554605	1	0.786	0.847	0
PS614328	Neonatal inflammatory skin and bowel disease	non-classical monocyte	-0.554605	1	0.717	0.847	0
PS614328	Neonatal inflammatory skin and bowel disease	lymphocyte	-0.554605	1	0.789	0.847	0
PS614328	Neonatal inflammatory skin and bowel disease	myofibroblast cell	1.02422	1	0.098	0.457333	0
PS614328	Neonatal inflammatory skin and bowel disease	fibroblast	1.11487	1	0.094	0.457333	0
PS614328	Neonatal inflammatory skin and bowel disease	fibroblast.1	2.82211	1	0.015	0.21	0
616368	Chops Syndrome	ciliated epithelial cell	0.798482	1	0.256	0.597333	0
616368	Chops Syndrome	pulmonary ionocyte; type II pneumocyte	0.524896	1	0.102	0.527333	0
616368	Chops Syndrome	pulmonary artery endothelial cell	0.414827	1	0.241	0.597333	0
616368	Chops Syndrome	capillary endothelial cell	-1.01681	1	0.962	0.962	0
616368	Chops Syndrome	pericyte cell	2.56789	1	0.045	0.527333	0
616368	Chops Syndrome	B cell	-0.693939	1	0.826	0.962	0
616368	Chops Syndrome	neutrophil	-1.06138	1	0.807	0.962	0
616368	Chops Syndrome	alveolar macrophage	-0.310072	1	0.63	0.962	0
616368	Chops Syndrome	classical monocyte	-0.889304	1	0.94	0.962	0
616368	Chops Syndrome	non-classical monocyte	-0.769322	1	0.846	0.962	0
616368	Chops Syndrome	lymphocyte	-0.640451	1	0.852	0.962	0
616368	Chops Syndrome	myofibroblast cell	-0.11643	1	0.584	0.962	0
616368	Chops Syndrome	fibroblast	0.413811	1	0.197	0.597333	0
616368	Chops Syndrome	fibroblast.1	0.777794	1	0.113	0.527333	0
616414	Autoimmune Interstitial Lung, Joint, And Kidney Disease	ciliated epithelial cell	-0.139023	1	0.61	0.939167	0
616414	Autoimmune Interstitial Lung, Joint, And Kidney Disease	pulmonary ionocyte; type II pneumocyte	-0.291023	1	0.546	0.939167	0
616414	Autoimmune Interstitial Lung, Joint, And Kidney Disease	pulmonary artery endothelial cell	0.581816	1	0.221	0.515667	0
616414	Autoimmune Interstitial Lung, Joint, And Kidney Disease	capillary endothelial cell	0.681417	1	0.197	0.515667	0
616414	Autoimmune Interstitial Lung, Joint, And Kidney Disease	pericyte cell	1.56116	1	0.125	0.515667	0
616414	Autoimmune Interstitial Lung, Joint, And Kidney Disease	B cell	-0.721816	1	0.797	0.939167	0
616414	Autoimmune Interstitial Lung, Joint, And Kidney Disease	neutrophil	-2.09338	1	0.987	0.987	0
616414	Autoimmune Interstitial Lung, Joint, And Kidney Disease	alveolar macrophage	1.16309	1	0.105	0.515667	0
616414	Autoimmune Interstitial Lung, Joint, And Kidney Disease	classical monocyte	-0.599875	1	0.805	0.939167	0
616414	Autoimmune Interstitial Lung, Joint, And Kidney Disease	non-classical monocyte	-1.27474	1	0.98	0.987	0
616414	Autoimmune Interstitial Lung, Joint, And Kidney Disease	lymphocyte	-0.423234	1	0.715	0.939167	0
616414	Autoimmune Interstitial Lung, Joint, And Kidney Disease	myofibroblast cell	0.128548	1	0.261	0.522	0
616414	Autoimmune Interstitial Lung, Joint, And Kidney Disease	fibroblast	0.396377	1	0.183	0.515667	0
616414	Autoimmune Interstitial Lung, Joint, And Kidney Disease	fibroblast.1	1.03068	1	0.097	0.515667	0
PS601462	Myasthenic syndrome, congenital	ciliated epithelial cell	-0.300544	1	0.675	0.69	0
PS601462	Myasthenic syndrome, congenital	pulmonary ionocyte; type II pneumocyte	-0.254309	1	0.466	0.69	0
PS601462	Myasthenic syndrome, congenital	pulmonary artery endothelial cell	-0.161233	1	0.62	0.69	0
PS601462	Myasthenic syndrome, congenital	capillary endothelial cell	-0.300544	1	0.69	0.69	0
PS601462	Myasthenic syndrome, congenital	pericyte cell	-0.300544	1	0.604	0.69	0
PS601462	Myasthenic syndrome, congenital	B cell	-0.300544	1	0.51	0.69	0
PS601462	Myasthenic syndrome, congenital	neutrophil	-0.300544	1	0.45	0.69	0
PS601462	Myasthenic syndrome, congenital	alveolar macrophage	-0.290053	1	0.64	0.69	0
PS601462	Myasthenic syndrome, congenital	classical monocyte	-0.27199	1	0.521	0.69	0
PS601462	Myasthenic syndrome, congenital	non-classical monocyte	-0.300544	1	0.553	0.69	0
PS601462	Myasthenic syndrome, congenital	lymphocyte	-0.243049	1	0.531	0.69	0
PS601462	Myasthenic syndrome, congenital	myofibroblast cell	-0.232951	1	0.604	0.69	0
PS601462	Myasthenic syndrome, congenital	fibroblast	3.4713	1	0	0	1
PS601462	Myasthenic syndrome, congenital	fibroblast.1	-0.214451	1	0.591	0.69	0
PS607426	Coenzyme Q10 deficiency, primary	ciliated epithelial cell	1.80904	1	0.139	0.329	0
PS607426	Coenzyme Q10 deficiency, primary	pulmonary ionocyte; type II pneumocyte	1.57556	1	0.045	0.329	0
PS607426	Coenzyme Q10 deficiency, primary	pulmonary artery endothelial cell	-0.0360048	1	0.555	0.951	0
PS607426	Coenzyme Q10 deficiency, primary	capillary endothelial cell	-0.933518	1	0.951	0.951	0
PS607426	Coenzyme Q10 deficiency, primary	pericyte cell	-1.15654	1	0.935	0.951	0
PS607426	Coenzyme Q10 deficiency, primary	B cell	-1.15654	1	0.94	0.951	0
PS607426	Coenzyme Q10 deficiency, primary	neutrophil	0.415176	1	0.132	0.329	0
PS607426	Coenzyme Q10 deficiency, primary	alveolar macrophage	-0.377011	1	0.688	0.951	0
PS607426	Coenzyme Q10 deficiency, primary	classical monocyte	0.0675774	1	0.141	0.329	0
PS607426	Coenzyme Q10 deficiency, primary	non-classical monocyte	-0.947938	1	0.93	0.951	0
PS607426	Coenzyme Q10 deficiency, primary	lymphocyte	-0.934367	1	0.949	0.951	0
PS607426	Coenzyme Q10 deficiency, primary	myofibroblast cell	-0.106661	1	0.541	0.951	0
PS607426	Coenzyme Q10 deficiency, primary	fibroblast	0.956332	1	0.099	0.329	0
PS607426	Coenzyme Q10 deficiency, primary	fibroblast.1	0.824895	1	0.129	0.329	0
PS153100	Lymphatic malformation	ciliated epithelial cell	-0.17152	2	0.625	0.888	0
PS153100	Lymphatic malformation	pulmonary ionocyte; type II pneumocyte	-0.487695	2	0.714	0.888	0
PS153100	Lymphatic malformation	pulmonary artery endothelial cell	2.62152	2	0.003	0.042	1
PS153100	Lymphatic malformation	capillary endothelial cell	1.77847	2	0.017	0.119	0
PS153100	Lymphatic malformation	pericyte cell	-0.211154	2	0.615	0.888	0
PS153100	Lymphatic malformation	B cell	-0.452676	2	0.654	0.888	0
PS153100	Lymphatic malformation	neutrophil	-0.150971	2	0.312	0.888	0
PS153100	Lymphatic malformation	alveolar macrophage	-0.525414	2	0.888	0.888	0
PS153100	Lymphatic malformation	classical monocyte	-0.508906	2	0.816	0.888	0
PS153100	Lymphatic malformation	non-classical monocyte	-0.514515	2	0.796	0.888	0
PS153100	Lymphatic malformation	lymphocyte	-0.530773	2	0.851	0.888	0
PS153100	Lymphatic malformation	myofibroblast cell	-0.213243	2	0.653	0.888	0
PS153100	Lymphatic malformation	fibroblast	-0.319015	2	0.826	0.888	0
PS153100	Lymphatic malformation	fibroblast.1	-0.314104	2	0.773	0.888	0
PS616866	Spinal muscular atrophy with congenital bone fractures	ciliated epithelial cell	2.57527	2	0.016	0.224	0
PS616866	Spinal muscular atrophy with congenital bone fractures	pulmonary ionocyte; type II pneumocyte	-0.445003	2	0.715	0.926154	0
PS616866	Spinal muscular atrophy with congenital bone fractures	pulmonary artery endothelial cell	0.165493	2	0.372	0.926154	0
PS616866	Spinal muscular atrophy with congenital bone fractures	capillary endothelial cell	-0.195166	2	0.678	0.926154	0
PS616866	Spinal muscular atrophy with congenital bone fractures	pericyte cell	0.58791	2	0.247	0.926154	0
PS616866	Spinal muscular atrophy with congenital bone fractures	B cell	-0.686627	2	0.86	0.926154	0
PS616866	Spinal muscular atrophy with congenital bone fractures	neutrophil	-0.935265	2	0.833	0.926154	0
PS616866	Spinal muscular atrophy with congenital bone fractures	alveolar macrophage	0.0907198	2	0.355	0.926154	0
PS616866	Spinal muscular atrophy with congenital bone fractures	classical monocyte	-0.492864	2	0.816	0.926154	0
PS616866	Spinal muscular atrophy with congenital bone fractures	non-classical monocyte	-0.455188	2	0.72	0.926154	0
PS616866	Spinal muscular atrophy with congenital bone fractures	lymphocyte	0.559454	2	0.111	0.777	0
PS616866	Spinal muscular atrophy with congenital bone fractures	myofibroblast cell	-0.116067	2	0.549	0.926154	0
PS616866	Spinal muscular atrophy with congenital bone fractures	fibroblast	-0.133214	2	0.622	0.926154	0
PS616866	Spinal muscular atrophy with congenital bone fractures	fibroblast.1	-0.519453	2	0.93	0.93	0
616897	Osteochondrodysplasia, Complex Lethal, Symoens-barnes-gistelinck Type	ciliated epithelial cell	2.90696	1	0.071	0.676667	0
616897	Osteochondrodysplasia, Complex Lethal, Symoens-barnes-gistelinck Type	pulmonary ionocyte; type II pneumocyte	-0.114335	1	0.413	0.76475	0
616897	Osteochondrodysplasia, Complex Lethal, Symoens-barnes-gistelinck Type	pulmonary artery endothelial cell	-0.825903	1	0.977	0.977	0
616897	Osteochondrodysplasia, Complex Lethal, Symoens-barnes-gistelinck Type	capillary endothelial cell	0.240141	1	0.295	0.688333	0
616897	Osteochondrodysplasia, Complex Lethal, Symoens-barnes-gistelinck Type	pericyte cell	-0.990595	1	0.919	0.977	0
616897	Osteochondrodysplasia, Complex Lethal, Symoens-barnes-gistelinck Type	B cell	0.496356	1	0.138	0.676667	0
616897	Osteochondrodysplasia, Complex Lethal, Symoens-barnes-gistelinck Type	neutrophil	-0.990595	1	0.775	0.977	0
616897	Osteochondrodysplasia, Complex Lethal, Symoens-barnes-gistelinck Type	alveolar macrophage	0.199068	1	0.207	0.6776	0
616897	Osteochondrodysplasia, Complex Lethal, Symoens-barnes-gistelinck Type	classical monocyte	-0.821267	1	0.907	0.977	0
616897	Osteochondrodysplasia, Complex Lethal, Symoens-barnes-gistelinck Type	non-classical monocyte	-0.346183	1	0.552	0.858667	0
616897	Osteochondrodysplasia, Complex Lethal, Symoens-barnes-gistelinck Type	lymphocyte	-0.0731269	1	0.437	0.76475	0
616897	Osteochondrodysplasia, Complex Lethal, Symoens-barnes-gistelinck Type	myofibroblast cell	-0.570807	1	0.84	0.977	0
616897	Osteochondrodysplasia, Complex Lethal, Symoens-barnes-gistelinck Type	fibroblast	0.330314	1	0.242	0.6776	0
616897	Osteochondrodysplasia, Complex Lethal, Symoens-barnes-gistelinck Type	fibroblast.1	0.55997	1	0.145	0.676667	0
617175	Retinal Dystrophy With Or Without Extraocular Anomalies	ciliated epithelial cell	0.91437	1	0.222	0.6216	0
617175	Retinal Dystrophy With Or Without Extraocular Anomalies	pulmonary ionocyte; type II pneumocyte	0.882704	1	0.073	0.340667	0
617175	Retinal Dystrophy With Or Without Extraocular Anomalies	pulmonary artery endothelial cell	-0.812722	1	0.963	0.981	0
617175	Retinal Dystrophy With Or Without Extraocular Anomalies	capillary endothelial cell	-0.381978	1	0.746	0.981	0
617175	Retinal Dystrophy With Or Without Extraocular Anomalies	pericyte cell	0.0427644	1	0.348	0.812	0
617175	Retinal Dystrophy With Or Without Extraocular Anomalies	B cell	-0.471889	1	0.653	0.981	0
617175	Retinal Dystrophy With Or Without Extraocular Anomalies	neutrophil	-1.03626	1	0.805	0.981	0
617175	Retinal Dystrophy With Or Without Extraocular Anomalies	alveolar macrophage	-0.887888	1	0.952	0.981	0
617175	Retinal Dystrophy With Or Without Extraocular Anomalies	classical monocyte	-1.0902	1	0.981	0.981	0
617175	Retinal Dystrophy With Or Without Extraocular Anomalies	non-classical monocyte	-0.818749	1	0.875	0.981	0
617175	Retinal Dystrophy With Or Without Extraocular Anomalies	lymphocyte	-0.469902	1	0.719	0.981	0
617175	Retinal Dystrophy With Or Without Extraocular Anomalies	myofibroblast cell	2.00194	1	0.034	0.340667	0
617175	Retinal Dystrophy With Or Without Extraocular Anomalies	fibroblast	0.798975	1	0.117	0.4095	0
617175	Retinal Dystrophy With Or Without Extraocular Anomalies	fibroblast.1	1.32884	1	0.054	0.340667	0
617180	Chitayat Syndrome	ciliated epithelial cell	1.59027	1	0.155	0.5425	0
617180	Chitayat Syndrome	pulmonary ionocyte; type II pneumocyte	-0.280278	1	0.538	0.968	0
617180	Chitayat Syndrome	pulmonary artery endothelial cell	1.18873	1	0.099	0.5425	0
617180	Chitayat Syndrome	capillary endothelial cell	-0.366078	1	0.699	0.968	0
617180	Chitayat Syndrome	pericyte cell	1.57456	1	0.136	0.5425	0
617180	Chitayat Syndrome	B cell	-0.68129	1	0.777	0.968	0
617180	Chitayat Syndrome	neutrophil	-1.18599	1	0.831	0.968	0
617180	Chitayat Syndrome	alveolar macrophage	-0.950069	1	0.968	0.968	0
617180	Chitayat Syndrome	classical monocyte	-0.274871	1	0.534	0.968	0
617180	Chitayat Syndrome	non-classical monocyte	-0.443533	1	0.66	0.968	0
617180	Chitayat Syndrome	lymphocyte	-0.818024	1	0.926	0.968	0
617180	Chitayat Syndrome	myofibroblast cell	-0.589522	1	0.844	0.968	0
617180	Chitayat Syndrome	fibroblast	-0.259401	1	0.679	0.968	0
617180	Chitayat Syndrome	fibroblast.1	1.4955	1	0.047	0.5425	0
PS601419	Myopathy, myofibrillar	ciliated epithelial cell	-0.343186	1	0.696	0.885	0
PS601419	Myopathy, myofibrillar	pulmonary ionocyte; type II pneumocyte	1.15121	1	0.059	0.413	0
PS601419	Myopathy, myofibrillar	pulmonary artery endothelial cell	0.718384	1	0.184	0.5152	0
PS601419	Myopathy, myofibrillar	capillary endothelial cell	2.58078	1	0.032	0.413	0
PS601419	Myopathy, myofibrillar	pericyte cell	-0.944154	1	0.885	0.885	0
PS601419	Myopathy, myofibrillar	B cell	-0.944154	1	0.859	0.885	0
PS601419	Myopathy, myofibrillar	neutrophil	-0.944154	1	0.766	0.885	0
PS601419	Myopathy, myofibrillar	alveolar macrophage	-0.662922	1	0.882	0.885	0
PS601419	Myopathy, myofibrillar	classical monocyte	0.224936	1	0.149	0.5152	0
PS601419	Myopathy, myofibrillar	non-classical monocyte	-0.538821	1	0.736	0.885	0
PS601419	Myopathy, myofibrillar	lymphocyte	-0.243433	1	0.569	0.885	0
PS601419	Myopathy, myofibrillar	myofibroblast cell	-0.446979	1	0.754	0.885	0
PS601419	Myopathy, myofibrillar	fibroblast	0.739235	1	0.119	0.5152	0
PS601419	Myopathy, myofibrillar	fibroblast.1	-0.346746	1	0.734	0.885	0
PS617468	Arthrogryposis multiplex congenita	ciliated epithelial cell	-0.198571	1	0.575	0.798	0
PS617468	Arthrogryposis multiplex congenita	pulmonary ionocyte; type II pneumocyte	-0.396922	1	0.617	0.798	0
PS617468	Arthrogryposis multiplex congenita	pulmonary artery endothelial cell	-0.396922	1	0.805	0.805	0
PS617468	Arthrogryposis multiplex congenita	capillary endothelial cell	-0.396922	1	0.737	0.798	0
PS617468	Arthrogryposis multiplex congenita	pericyte cell	-0.396922	1	0.695	0.798	0
PS617468	Arthrogryposis multiplex congenita	B cell	-0.396922	1	0.558	0.798	0
PS617468	Arthrogryposis multiplex congenita	neutrophil	-0.396922	1	0.507	0.798	0
PS617468	Arthrogryposis multiplex congenita	alveolar macrophage	-0.396922	1	0.694	0.798	0
PS617468	Arthrogryposis multiplex congenita	classical monocyte	-0.318013	1	0.549	0.798	0
PS617468	Arthrogryposis multiplex congenita	non-classical monocyte	-0.396922	1	0.623	0.798	0
PS617468	Arthrogryposis multiplex congenita	lymphocyte	-0.396922	1	0.652	0.798	0
PS617468	Arthrogryposis multiplex congenita	myofibroblast cell	-0.396922	1	0.741	0.798	0
PS617468	Arthrogryposis multiplex congenita	fibroblast	1.46099	1	0.052	0.364	0
PS617468	Arthrogryposis multiplex congenita	fibroblast.1	3.02481	1	0.012	0.168	0
PS245480	Specific granule deficiency	ciliated epithelial cell	0.686321	1	0.248	0.568	0
PS245480	Specific granule deficiency	pulmonary ionocyte; type II pneumocyte	-1.94367	1	0.997	0.997	0
PS245480	Specific granule deficiency	pulmonary artery endothelial cell	0.337441	1	0.27	0.568	0
PS245480	Specific granule deficiency	capillary endothelial cell	0.951403	1	0.19	0.568	0
PS245480	Specific granule deficiency	pericyte cell	-0.15249	1	0.531	0.7826	0
PS245480	Specific granule deficiency	B cell	1.9265	1	0.032	0.448	0
PS245480	Specific granule deficiency	neutrophil	0.437914	1	0.108	0.568	0
PS245480	Specific granule deficiency	alveolar macrophage	-0.876628	1	0.954	0.997	0
PS245480	Specific granule deficiency	classical monocyte	-0.0696559	1	0.415	0.72625	0
PS245480	Specific granule deficiency	non-classical monocyte	0.5888	1	0.125	0.568	0
PS245480	Specific granule deficiency	lymphocyte	-0.397596	1	0.66	0.84	0
PS245480	Specific granule deficiency	myofibroblast cell	-1.57921	1	0.995	0.997	0
PS245480	Specific granule deficiency	fibroblast	0.166906	1	0.284	0.568	0
PS245480	Specific granule deficiency	fibroblast.1	-0.0760307	1	0.559	0.7826	0
617602	Congenital Heart Defects And Skeletal Malformations Syndrome	ciliated epithelial cell	-0.27204	1	0.636	0.882	0
617602	Congenital Heart Defects And Skeletal Malformations Syndrome	pulmonary ionocyte; type II pneumocyte	-0.547054	1	0.706	0.882	0
617602	Congenital Heart Defects And Skeletal Malformations Syndrome	pulmonary artery endothelial cell	-0.189591	1	0.623	0.882	0
617602	Congenital Heart Defects And Skeletal Malformations Syndrome	capillary endothelial cell	0.0837953	1	0.326	0.882	0
617602	Congenital Heart Defects And Skeletal Malformations Syndrome	pericyte cell	2.91944	1	0.026	0.364	0
617602	Congenital Heart Defects And Skeletal Malformations Syndrome	B cell	-1.11155	1	0.926	0.926	0
617602	Congenital Heart Defects And Skeletal Malformations Syndrome	neutrophil	-1.11155	1	0.819	0.882	0
617602	Congenital Heart Defects And Skeletal Malformations Syndrome	alveolar macrophage	-0.471836	1	0.776	0.882	0
617602	Congenital Heart Defects And Skeletal Malformations Syndrome	classical monocyte	-0.0202492	1	0.378	0.882	0
617602	Congenital Heart Defects And Skeletal Malformations Syndrome	non-classical monocyte	-0.316434	1	0.551	0.882	0
617602	Congenital Heart Defects And Skeletal Malformations Syndrome	lymphocyte	-0.394838	1	0.691	0.882	0
617602	Congenital Heart Defects And Skeletal Malformations Syndrome	myofibroblast cell	0.29687	1	0.22	0.882	0
617602	Congenital Heart Defects And Skeletal Malformations Syndrome	fibroblast	0.132669	1	0.28	0.882	0
617602	Congenital Heart Defects And Skeletal Malformations Syndrome	fibroblast.1	1.00237	1	0.098	0.686	0
617780	Combined Immunodeficiency And Megaloblastic Anemia With Or Without Hyperhomocysteinemia	ciliated epithelial cell	-0.25369	1	0.634	0.802	0
617780	Combined Immunodeficiency And Megaloblastic Anemia With Or Without Hyperhomocysteinemia	pulmonary ionocyte; type II pneumocyte	3.36322	1	0.01	0.14	0
617780	Combined Immunodeficiency And Megaloblastic Anemia With Or Without Hyperhomocysteinemia	pulmonary artery endothelial cell	-0.0605045	1	0.588	0.802	0
617780	Combined Immunodeficiency And Megaloblastic Anemia With Or Without Hyperhomocysteinemia	capillary endothelial cell	-0.122093	1	0.559	0.802	0
617780	Combined Immunodeficiency And Megaloblastic Anemia With Or Without Hyperhomocysteinemia	pericyte cell	-0.0510904	1	0.528	0.802	0
617780	Combined Immunodeficiency And Megaloblastic Anemia With Or Without Hyperhomocysteinemia	B cell	-0.363368	1	0.57	0.802	0
617780	Combined Immunodeficiency And Megaloblastic Anemia With Or Without Hyperhomocysteinemia	neutrophil	-0.691379	1	0.667	0.802	0
617780	Combined Immunodeficiency And Megaloblastic Anemia With Or Without Hyperhomocysteinemia	alveolar macrophage	-0.00834966	1	0.474	0.802	0
617780	Combined Immunodeficiency And Megaloblastic Anemia With Or Without Hyperhomocysteinemia	classical monocyte	-0.546849	1	0.757	0.802	0
617780	Combined Immunodeficiency And Megaloblastic Anemia With Or Without Hyperhomocysteinemia	non-classical monocyte	-0.691379	1	0.802	0.802	0
617780	Combined Immunodeficiency And Megaloblastic Anemia With Or Without Hyperhomocysteinemia	lymphocyte	-0.210893	1	0.506	0.802	0
617780	Combined Immunodeficiency And Megaloblastic Anemia With Or Without Hyperhomocysteinemia	myofibroblast cell	0.116256	1	0.281	0.802	0
617780	Combined Immunodeficiency And Megaloblastic Anemia With Or Without Hyperhomocysteinemia	fibroblast	-0.0934109	1	0.555	0.802	0
617780	Combined Immunodeficiency And Megaloblastic Anemia With Or Without Hyperhomocysteinemia	fibroblast.1	-0.386467	1	0.743	0.802	0
PS231050	Geleophysic dysplasia	ciliated epithelial cell	-0.296312	1	0.636	0.878	0
PS231050	Geleophysic dysplasia	pulmonary ionocyte; type II pneumocyte	0.596342	1	0.094	0.438667	0
PS231050	Geleophysic dysplasia	pulmonary artery endothelial cell	-0.431937	1	0.818	0.878	0
PS231050	Geleophysic dysplasia	capillary endothelial cell	-0.620074	1	0.853	0.878	0
PS231050	Geleophysic dysplasia	pericyte cell	0.153553	1	0.306	0.8568	0
PS231050	Geleophysic dysplasia	B cell	-0.682701	1	0.732	0.878	0
PS231050	Geleophysic dysplasia	neutrophil	-0.682701	1	0.656	0.878	0
PS231050	Geleophysic dysplasia	alveolar macrophage	-0.604987	1	0.87	0.878	0
PS231050	Geleophysic dysplasia	classical monocyte	-0.566076	1	0.786	0.878	0
PS231050	Geleophysic dysplasia	non-classical monocyte	-0.655008	1	0.81	0.878	0
PS231050	Geleophysic dysplasia	lymphocyte	-0.66074	1	0.878	0.878	0
PS231050	Geleophysic dysplasia	myofibroblast cell	2.79367	1	0.004	0.056	1
PS231050	Geleophysic dysplasia	fibroblast	0.440965	1	0.197	0.6895	0
PS231050	Geleophysic dysplasia	fibroblast.1	1.216	1	0.065	0.438667	0
PS607596	Pontocerebellar hypoplasia	ciliated epithelial cell	-0.160739	1	0.641	0.966	0
PS607596	Pontocerebellar hypoplasia	pulmonary ionocyte; type II pneumocyte	-0.607943	1	0.784	0.966	0
PS607596	Pontocerebellar hypoplasia	pulmonary artery endothelial cell	0.803114	1	0.156	0.429333	0
PS607596	Pontocerebellar hypoplasia	capillary endothelial cell	2.09769	1	0.064	0.429333	0
PS607596	Pontocerebellar hypoplasia	pericyte cell	-0.710403	1	0.828	0.966	0
PS607596	Pontocerebellar hypoplasia	B cell	-0.621183	1	0.747	0.966	0
PS607596	Pontocerebellar hypoplasia	neutrophil	-1.92573	1	0.978	0.978	0
PS607596	Pontocerebellar hypoplasia	alveolar macrophage	1.32775	1	0.065	0.429333	0
PS607596	Pontocerebellar hypoplasia	classical monocyte	0.354777	1	0.119	0.429333	0
PS607596	Pontocerebellar hypoplasia	non-classical monocyte	0.33929	1	0.151	0.429333	0
PS607596	Pontocerebellar hypoplasia	lymphocyte	0.350292	1	0.184	0.429333	0
PS607596	Pontocerebellar hypoplasia	myofibroblast cell	-0.367897	1	0.714	0.966	0
PS607596	Pontocerebellar hypoplasia	fibroblast	-0.834472	1	0.972	0.978	0
PS607596	Pontocerebellar hypoplasia	fibroblast.1	-0.0445425	1	0.53	0.966	0
618175	Warburg-cinotti Syndrome	ciliated epithelial cell	-0.541191	1	0.809	0.853	0
618175	Warburg-cinotti Syndrome	pulmonary ionocyte; type II pneumocyte	-0.498456	1	0.701	0.853	0
618175	Warburg-cinotti Syndrome	pulmonary artery endothelial cell	-0.106421	1	0.59	0.853	0
618175	Warburg-cinotti Syndrome	capillary endothelial cell	-0.564284	1	0.853	0.853	0
618175	Warburg-cinotti Syndrome	pericyte cell	-0.337579	1	0.636	0.853	0
618175	Warburg-cinotti Syndrome	B cell	-0.521946	1	0.665	0.853	0
618175	Warburg-cinotti Syndrome	neutrophil	-0.433649	1	0.533	0.853	0
618175	Warburg-cinotti Syndrome	alveolar macrophage	-0.527698	1	0.796	0.853	0
618175	Warburg-cinotti Syndrome	classical monocyte	-0.5294	1	0.748	0.853	0
618175	Warburg-cinotti Syndrome	non-classical monocyte	-0.531542	1	0.722	0.853	0
618175	Warburg-cinotti Syndrome	lymphocyte	-0.440353	1	0.737	0.853	0
618175	Warburg-cinotti Syndrome	myofibroblast cell	1.78454	1	0.032	0.224	0
618175	Warburg-cinotti Syndrome	fibroblast	0.609093	1	0.184	0.853	0
618175	Warburg-cinotti Syndrome	fibroblast.1	2.63888	1	0.011	0.154	0
618213	Inflammatory Bowel Disease, Immunodeficiency, And Encephalopathy	ciliated epithelial cell	-1.04737	1	0.969	0.982	0
618213	Inflammatory Bowel Disease, Immunodeficiency, And Encephalopathy	pulmonary ionocyte; type II pneumocyte	-0.939329	1	0.926	0.982	0
618213	Inflammatory Bowel Disease, Immunodeficiency, And Encephalopathy	pulmonary artery endothelial cell	0.120554	1	0.32	0.746667	0
618213	Inflammatory Bowel Disease, Immunodeficiency, And Encephalopathy	capillary endothelial cell	0.736397	1	0.195	0.546	0
618213	Inflammatory Bowel Disease, Immunodeficiency, And Encephalopathy	pericyte cell	-0.366753	1	0.702	0.982	0
618213	Inflammatory Bowel Disease, Immunodeficiency, And Encephalopathy	B cell	0.061682	1	0.19	0.546	0
618213	Inflammatory Bowel Disease, Immunodeficiency, And Encephalopathy	neutrophil	-0.185668	1	0.376	0.752	0
618213	Inflammatory Bowel Disease, Immunodeficiency, And Encephalopathy	alveolar macrophage	0.776192	1	0.146	0.546	0
618213	Inflammatory Bowel Disease, Immunodeficiency, And Encephalopathy	classical monocyte	2.03887	1	0.01	0.14	0
618213	Inflammatory Bowel Disease, Immunodeficiency, And Encephalopathy	non-classical monocyte	1.69795	1	0.025	0.175	0
[truncated: 88 more rows]

## Sheet: Skeletal muscle
Supplementary File 6C. Diseases and their PrEDiCT scores across cell types in skeletal muscle.
Disease\Phenotypic series accession (OMIM)	Disease name (OMIM)	Cell type name	PrEDiCT score	Number of orthologous causal genes	P value	FDR	Cell type likely-affected by disease (1=Yes, 0=No)
PS100300	Adams-Oliver syndrome	striated muscle cell	-0.924778	2	0.826	0.997	0
PS100300	Adams-Oliver syndrome	macrophage	-0.634672	2	0.942	0.997	0
PS100300	Adams-Oliver syndrome	monocyte-derived dendritic cell	-0.569621	2	0.893	0.997	0
PS100300	Adams-Oliver syndrome	T-helper 17 cell	0.503858	2	0.195	0.529286	0
PS100300	Adams-Oliver syndrome	skeletal muscle satellite cell	-0.707646	2	0.939	0.997	0
PS100300	Adams-Oliver syndrome	CD8-positive, alpha-beta T cell	-0.440269	2	0.74	0.997	0
PS100300	Adams-Oliver syndrome	B cell	-0.587968	2	0.887	0.997	0
PS100300	Adams-Oliver syndrome	endothelial cell of lymphatic vessel	0.564108	2	0.154	0.487667	0
PS100300	Adams-Oliver syndrome	vein endothelial cell; endothelial stalk cell	1.09094	2	0.037	0.234333	0
PS100300	Adams-Oliver syndrome	endothelial cell of artery	1.44528	2	0.017	0.234333	0
PS100300	Adams-Oliver syndrome	capillary endothelial cell	1.42192	2	0.028	0.234333	0
PS100300	Adams-Oliver syndrome	blood vessel endothelial cell	0.806459	2	0.081	0.323	0
PS100300	Adams-Oliver syndrome	pericyte cell	0.311937	2	0.26	0.6175	0
PS100300	Adams-Oliver syndrome	tendon cell	-0.673902	2	0.979	0.997	0
PS100300	Adams-Oliver syndrome	stromal cell	-0.847412	2	0.971	0.997	0
PS100300	Adams-Oliver syndrome	skeletal muscle fibroblast; fibroblast	-0.744222	2	0.991	0.997	0
PS100300	Adams-Oliver syndrome	skeletal muscle fibroblast; fibroblast.1	-0.866732	2	0.997	0.997	0
PS100300	Adams-Oliver syndrome	myelinating Schwann cell	-0.36064	2	0.812	0.997	0
PS100300	Adams-Oliver syndrome	smooth muscle cell	1.21336	2	0.085	0.323	0
100800	Achondroplasia	striated muscle cell	-0.0705113	1	0.471	0.83	0
100800	Achondroplasia	macrophage	-0.441705	1	0.754	0.83	0
100800	Achondroplasia	monocyte-derived dendritic cell	-0.461515	1	0.73	0.83	0
100800	Achondroplasia	T-helper 17 cell	-0.461515	1	0.701	0.83	0
100800	Achondroplasia	skeletal muscle satellite cell	-0.402093	1	0.674	0.83	0
100800	Achondroplasia	CD8-positive, alpha-beta T cell	-0.461515	1	0.695	0.83	0
100800	Achondroplasia	B cell	-0.44907	1	0.705	0.83	0
100800	Achondroplasia	endothelial cell of lymphatic vessel	-0.183153	1	0.649	0.83	0
100800	Achondroplasia	vein endothelial cell; endothelial stalk cell	0.803172	1	0.117	0.817	0
100800	Achondroplasia	endothelial cell of artery	3.75386	1	0.002	0.038	1
100800	Achondroplasia	capillary endothelial cell	0.806885	1	0.16	0.817	0
100800	Achondroplasia	blood vessel endothelial cell	0.426353	1	0.172	0.817	0
100800	Achondroplasia	pericyte cell	-0.429273	1	0.83	0.83	0
100800	Achondroplasia	tendon cell	-0.385295	1	0.722	0.83	0
100800	Achondroplasia	stromal cell	-0.461515	1	0.779	0.83	0
100800	Achondroplasia	skeletal muscle fibroblast; fibroblast	-0.399416	1	0.747	0.83	0
100800	Achondroplasia	skeletal muscle fibroblast; fibroblast.1	-0.449577	1	0.828	0.83	0
100800	Achondroplasia	myelinating Schwann cell	-0.272597	1	0.703	0.83	0
100800	Achondroplasia	smooth muscle cell	-0.461515	1	0.765	0.83	0
103050	Adenylosuccinase Deficiency	striated muscle cell	3.11125	1	0.05	0.741	0
103050	Adenylosuccinase Deficiency	macrophage	-0.307021	1	0.651	0.929	0
103050	Adenylosuccinase Deficiency	monocyte-derived dendritic cell	-0.710877	1	0.858	0.929	0
103050	Adenylosuccinase Deficiency	T-helper 17 cell	-0.685262	1	0.807	0.929	0
103050	Adenylosuccinase Deficiency	skeletal muscle satellite cell	-0.324062	1	0.617	0.929	0
103050	Adenylosuccinase Deficiency	CD8-positive, alpha-beta T cell	-0.12222	1	0.533	0.929	0
103050	Adenylosuccinase Deficiency	B cell	-0.34549	1	0.662	0.929	0
103050	Adenylosuccinase Deficiency	endothelial cell of lymphatic vessel	-0.192491	1	0.662	0.929	0
103050	Adenylosuccinase Deficiency	vein endothelial cell; endothelial stalk cell	-0.364701	1	0.771	0.929	0
103050	Adenylosuccinase Deficiency	endothelial cell of artery	-0.593328	1	0.914	0.929	0
103050	Adenylosuccinase Deficiency	capillary endothelial cell	0.463412	1	0.204	0.929	0
103050	Adenylosuccinase Deficiency	blood vessel endothelial cell	-0.785907	1	0.929	0.929	0
103050	Adenylosuccinase Deficiency	pericyte cell	-0.0871004	1	0.615	0.929	0
103050	Adenylosuccinase Deficiency	tendon cell	-0.347924	1	0.712	0.929	0
103050	Adenylosuccinase Deficiency	stromal cell	0.955422	1	0.117	0.741	0
103050	Adenylosuccinase Deficiency	skeletal muscle fibroblast; fibroblast	-0.410348	1	0.754	0.929	0
103050	Adenylosuccinase Deficiency	skeletal muscle fibroblast; fibroblast.1	-0.697891	1	0.911	0.929	0
103050	Adenylosuccinase Deficiency	myelinating Schwann cell	-0.485386	1	0.817	0.929	0
103050	Adenylosuccinase Deficiency	smooth muscle cell	1.92993	1	0.09	0.741	0
105120	Amyloidosis V	striated muscle cell	-0.50358	1	0.605	0.898	0
105120	Amyloidosis V	macrophage	-0.458373	1	0.775	0.898	0
105120	Amyloidosis V	monocyte-derived dendritic cell	-0.448714	1	0.719	0.898	0
105120	Amyloidosis V	T-helper 17 cell	-0.52386	1	0.731	0.898	0
105120	Amyloidosis V	skeletal muscle satellite cell	-0.450429	1	0.689	0.898	0
105120	Amyloidosis V	CD8-positive, alpha-beta T cell	-0.529958	1	0.704	0.898	0
105120	Amyloidosis V	B cell	-0.522005	1	0.752	0.898	0
105120	Amyloidosis V	endothelial cell of lymphatic vessel	-0.522127	1	0.872	0.898	0
105120	Amyloidosis V	vein endothelial cell; endothelial stalk cell	-0.511743	1	0.846	0.898	0
105120	Amyloidosis V	endothelial cell of artery	-0.531575	1	0.871	0.898	0
105120	Amyloidosis V	capillary endothelial cell	-0.527935	1	0.898	0.898	0
105120	Amyloidosis V	blood vessel endothelial cell	-0.529354	1	0.823	0.898	0
105120	Amyloidosis V	pericyte cell	-0.46246	1	0.867	0.898	0
105120	Amyloidosis V	tendon cell	0.227912	1	0.138	0.6555	0
105120	Amyloidosis V	stromal cell	1.78021	1	0.034	0.215333	0
105120	Amyloidosis V	skeletal muscle fibroblast; fibroblast	2.93347	1	0.002	0.038	1
105120	Amyloidosis V	skeletal muscle fibroblast; fibroblast.1	1.58814	1	0.025	0.215333	0
105120	Amyloidosis V	myelinating Schwann cell	-0.431513	1	0.791	0.898	0
105120	Amyloidosis V	smooth muscle cell	0.423895	1	0.223	0.8474	0
PS105400	Amyotrophic lateral sclerosis	striated muscle cell	-0.847323	16	0.978	0.997	0
PS105400	Amyotrophic lateral sclerosis	macrophage	-0.270806	16	0.86	0.997	0
PS105400	Amyotrophic lateral sclerosis	monocyte-derived dendritic cell	-0.25045	16	0.776	0.997	0
PS105400	Amyotrophic lateral sclerosis	T-helper 17 cell	-0.696338	16	0.997	0.997	0
PS105400	Amyotrophic lateral sclerosis	skeletal muscle satellite cell	-0.385089	16	0.92	0.997	0
PS105400	Amyotrophic lateral sclerosis	CD8-positive, alpha-beta T cell	-0.453309	16	0.948	0.997	0
PS105400	Amyotrophic lateral sclerosis	B cell	-0.360417	16	0.912	0.997	0
PS105400	Amyotrophic lateral sclerosis	endothelial cell of lymphatic vessel	0.747746	16	0.001	0.019	0
PS105400	Amyotrophic lateral sclerosis	vein endothelial cell; endothelial stalk cell	0.0826105	16	0.016	0.101333	0
PS105400	Amyotrophic lateral sclerosis	endothelial cell of artery	0.255493	16	0.005	0.0475	0
PS105400	Amyotrophic lateral sclerosis	capillary endothelial cell	-0.0808365	16	0.879	0.997	0
PS105400	Amyotrophic lateral sclerosis	blood vessel endothelial cell	-0.18078	16	0.78	0.997	0
PS105400	Amyotrophic lateral sclerosis	pericyte cell	-0.213661	16	0.938	0.997	0
PS105400	Amyotrophic lateral sclerosis	tendon cell	-0.172068	16	0.686	0.997	0
PS105400	Amyotrophic lateral sclerosis	stromal cell	-0.306794	16	0.934	0.997	0
PS105400	Amyotrophic lateral sclerosis	skeletal muscle fibroblast; fibroblast	-0.270632	16	0.905	0.997	0
PS105400	Amyotrophic lateral sclerosis	skeletal muscle fibroblast; fibroblast.1	-0.120717	16	0.715	0.997	0
PS105400	Amyotrophic lateral sclerosis	myelinating Schwann cell	-0.375424	16	0.988	0.997	0
PS105400	Amyotrophic lateral sclerosis	smooth muscle cell	-0.281934	16	0.954	0.997	0
105500	Amyotrophic Lateral Sclerosis-parkinsonism/dementia Complex 1	striated muscle cell	-0.621079	1	0.65	0.98	0
105500	Amyotrophic Lateral Sclerosis-parkinsonism/dementia Complex 1	macrophage	0.847459	1	0.093	0.463125	0
105500	Amyotrophic Lateral Sclerosis-parkinsonism/dementia Complex 1	monocyte-derived dendritic cell	-0.905634	1	0.939	0.98	0
105500	Amyotrophic Lateral Sclerosis-parkinsonism/dementia Complex 1	T-helper 17 cell	-1.07006	1	0.927	0.98	0
105500	Amyotrophic Lateral Sclerosis-parkinsonism/dementia Complex 1	skeletal muscle satellite cell	-0.831109	1	0.91	0.98	0
105500	Amyotrophic Lateral Sclerosis-parkinsonism/dementia Complex 1	CD8-positive, alpha-beta T cell	0.0400151	1	0.168	0.463125	0
105500	Amyotrophic Lateral Sclerosis-parkinsonism/dementia Complex 1	B cell	-0.312148	1	0.623	0.98	0
105500	Amyotrophic Lateral Sclerosis-parkinsonism/dementia Complex 1	endothelial cell of lymphatic vessel	0.309629	1	0.232	0.489778	0
105500	Amyotrophic Lateral Sclerosis-parkinsonism/dementia Complex 1	vein endothelial cell; endothelial stalk cell	-0.68968	1	0.916	0.98	0
105500	Amyotrophic Lateral Sclerosis-parkinsonism/dementia Complex 1	endothelial cell of artery	0.734614	1	0.137	0.463125	0
105500	Amyotrophic Lateral Sclerosis-parkinsonism/dementia Complex 1	capillary endothelial cell	0.571493	1	0.171	0.463125	0
105500	Amyotrophic Lateral Sclerosis-parkinsonism/dementia Complex 1	blood vessel endothelial cell	-0.536532	1	0.816	0.98	0
105500	Amyotrophic Lateral Sclerosis-parkinsonism/dementia Complex 1	pericyte cell	0.519431	1	0.195	0.463125	0
105500	Amyotrophic Lateral Sclerosis-parkinsonism/dementia Complex 1	tendon cell	0.131038	1	0.143	0.463125	0
105500	Amyotrophic Lateral Sclerosis-parkinsonism/dementia Complex 1	stromal cell	-1.28503	1	0.98	0.98	0
105500	Amyotrophic Lateral Sclerosis-parkinsonism/dementia Complex 1	skeletal muscle fibroblast; fibroblast	-0.284945	1	0.686	0.98	0
105500	Amyotrophic Lateral Sclerosis-parkinsonism/dementia Complex 1	skeletal muscle fibroblast; fibroblast.1	0.375411	1	0.149	0.463125	0
105500	Amyotrophic Lateral Sclerosis-parkinsonism/dementia Complex 1	myelinating Schwann cell	-0.189593	1	0.651	0.98	0
105500	Amyotrophic Lateral Sclerosis-parkinsonism/dementia Complex 1	smooth muscle cell	3.19673	1	0.026	0.463125	0
PS105550	Frontotemporal dementia and/or Amyotrophic Lateral Sclerosis	striated muscle cell	-0.89059	4	0.887	0.999	0
PS105550	Frontotemporal dementia and/or Amyotrophic Lateral Sclerosis	macrophage	0.535106	4	0.031	0.2945	0
PS105550	Frontotemporal dementia and/or Amyotrophic Lateral Sclerosis	monocyte-derived dendritic cell	-0.231909	4	0.615	0.97375	0
PS105550	Frontotemporal dementia and/or Amyotrophic Lateral Sclerosis	T-helper 17 cell	-1.20977	4	0.999	0.999	0
PS105550	Frontotemporal dementia and/or Amyotrophic Lateral Sclerosis	skeletal muscle satellite cell	-0.212948	4	0.55	0.97375	0
PS105550	Frontotemporal dementia and/or Amyotrophic Lateral Sclerosis	CD8-positive, alpha-beta T cell	-0.64335	4	0.936	0.999	0
PS105550	Frontotemporal dementia and/or Amyotrophic Lateral Sclerosis	B cell	-0.359367	4	0.79	0.999	0
PS105550	Frontotemporal dementia and/or Amyotrophic Lateral Sclerosis	endothelial cell of lymphatic vessel	0.780362	4	0.04	0.2945	0
PS105550	Frontotemporal dementia and/or Amyotrophic Lateral Sclerosis	vein endothelial cell; endothelial stalk cell	0.0182769	4	0.229	0.8702	0
PS105550	Frontotemporal dementia and/or Amyotrophic Lateral Sclerosis	endothelial cell of artery	0.4983	4	0.052	0.2945	0
PS105550	Frontotemporal dementia and/or Amyotrophic Lateral Sclerosis	capillary endothelial cell	-0.310448	4	0.92	0.999	0
PS105550	Frontotemporal dementia and/or Amyotrophic Lateral Sclerosis	blood vessel endothelial cell	-0.0415632	4	0.408	0.97375	0
PS105550	Frontotemporal dementia and/or Amyotrophic Lateral Sclerosis	pericyte cell	-0.0491186	4	0.56	0.97375	0
PS105550	Frontotemporal dementia and/or Amyotrophic Lateral Sclerosis	tendon cell	0.186483	4	0.062	0.2945	0
PS105550	Frontotemporal dementia and/or Amyotrophic Lateral Sclerosis	stromal cell	-0.337797	4	0.814	0.999	0
PS105550	Frontotemporal dementia and/or Amyotrophic Lateral Sclerosis	skeletal muscle fibroblast; fibroblast	-0.153088	4	0.582	0.97375	0
PS105550	Frontotemporal dementia and/or Amyotrophic Lateral Sclerosis	skeletal muscle fibroblast; fibroblast.1	-0.145828	4	0.607	0.97375	0
PS105550	Frontotemporal dementia and/or Amyotrophic Lateral Sclerosis	myelinating Schwann cell	-0.620531	4	0.985	0.999	0
PS105550	Frontotemporal dementia and/or Amyotrophic Lateral Sclerosis	smooth muscle cell	-0.0377053	4	0.53	0.97375	0
105830	Angelman Syndrome	striated muscle cell	0.507299	1	0.121	0.67925	0
105830	Angelman Syndrome	macrophage	-0.623346	1	0.842	0.954222	0
105830	Angelman Syndrome	monocyte-derived dendritic cell	-0.469183	1	0.734	0.954222	0
105830	Angelman Syndrome	T-helper 17 cell	-1.40445	1	0.977	0.977	0
105830	Angelman Syndrome	skeletal muscle satellite cell	-0.40403	1	0.678	0.954222	0
105830	Angelman Syndrome	CD8-positive, alpha-beta T cell	-0.596207	1	0.779	0.954222	0
105830	Angelman Syndrome	B cell	-0.626299	1	0.82	0.954222	0
105830	Angelman Syndrome	endothelial cell of lymphatic vessel	0.139828	1	0.27	0.729125	0
105830	Angelman Syndrome	vein endothelial cell; endothelial stalk cell	-0.120733	1	0.605	0.954222	0
105830	Angelman Syndrome	endothelial cell of artery	-0.614242	1	0.904	0.954222	0
105830	Angelman Syndrome	capillary endothelial cell	0.0752675	1	0.307	0.729125	0
105830	Angelman Syndrome	blood vessel endothelial cell	-0.619826	1	0.857	0.954222	0
105830	Angelman Syndrome	pericyte cell	2.22242	1	0.037	0.551	0
105830	Angelman Syndrome	tendon cell	0.151326	1	0.143	0.67925	0
105830	Angelman Syndrome	stromal cell	0.136606	1	0.228	0.722	0
105830	Angelman Syndrome	skeletal muscle fibroblast; fibroblast	-0.246291	1	0.657	0.954222	0
105830	Angelman Syndrome	skeletal muscle fibroblast; fibroblast.1	0.0866837	1	0.197	0.722	0
105830	Angelman Syndrome	myelinating Schwann cell	2.8621	1	0.058	0.551	0
105830	Angelman Syndrome	smooth muscle cell	-0.456914	1	0.772	0.954222	0
PS108120	Arthrogryposis, distal	striated muscle cell	4.12808	4	0	0	1
PS108120	Arthrogryposis, distal	macrophage	-0.230827	4	0.667	0.872	0
PS108120	Arthrogryposis, distal	monocyte-derived dendritic cell	-0.236448	4	0.632	0.872	0
PS108120	Arthrogryposis, distal	T-helper 17 cell	-0.229766	4	0.623	0.872	0
PS108120	Arthrogryposis, distal	skeletal muscle satellite cell	-0.230492	4	0.569	0.872	0
PS108120	Arthrogryposis, distal	CD8-positive, alpha-beta T cell	-0.237048	4	0.579	0.872	0
PS108120	Arthrogryposis, distal	B cell	-0.236513	4	0.639	0.872	0
PS108120	Arthrogryposis, distal	endothelial cell of lymphatic vessel	-0.23798	4	0.835	0.872	0
PS108120	Arthrogryposis, distal	vein endothelial cell; endothelial stalk cell	-0.237687	4	0.778	0.872	0
PS108120	Arthrogryposis, distal	endothelial cell of artery	-0.232642	4	0.804	0.872	0
PS108120	Arthrogryposis, distal	capillary endothelial cell	-0.237588	4	0.872	0.872	0
PS108120	Arthrogryposis, distal	blood vessel endothelial cell	-0.234958	4	0.702	0.872	0
PS108120	Arthrogryposis, distal	pericyte cell	-0.23823	4	0.846	0.872	0
PS108120	Arthrogryposis, distal	tendon cell	-0.231147	4	0.704	0.872	0
PS108120	Arthrogryposis, distal	stromal cell	-0.229574	4	0.713	0.872	0
PS108120	Arthrogryposis, distal	skeletal muscle fibroblast; fibroblast	-0.22993	4	0.719	0.872	0
PS108120	Arthrogryposis, distal	skeletal muscle fibroblast; fibroblast.1	-0.23692	4	0.742	0.872	0
PS108120	Arthrogryposis, distal	myelinating Schwann cell	-0.237965	4	0.796	0.872	0
PS108120	Arthrogryposis, distal	smooth muscle cell	-0.236492	4	0.753	0.872	0
PS160120	Episodic ataxia	striated muscle cell	-0.275353	2	0.446	0.833	0
PS160120	Episodic ataxia	macrophage	-0.273835	2	0.645	0.833	0
PS160120	Episodic ataxia	monocyte-derived dendritic cell	-0.245945	2	0.582	0.833	0
PS160120	Episodic ataxia	T-helper 17 cell	-0.275353	2	0.606	0.833	0
PS160120	Episodic ataxia	skeletal muscle satellite cell	-0.232286	2	0.529	0.833	0
PS160120	Episodic ataxia	CD8-positive, alpha-beta T cell	-0.275353	2	0.581	0.833	0
PS160120	Episodic ataxia	B cell	-0.275353	2	0.612	0.833	0
PS160120	Episodic ataxia	endothelial cell of lymphatic vessel	-0.275353	2	0.783	0.833	0
PS160120	Episodic ataxia	vein endothelial cell; endothelial stalk cell	-0.260345	2	0.739	0.833	0
PS160120	Episodic ataxia	endothelial cell of artery	-0.275353	2	0.758	0.833	0
PS160120	Episodic ataxia	capillary endothelial cell	-0.275353	2	0.833	0.833	0
PS160120	Episodic ataxia	blood vessel endothelial cell	-0.275353	2	0.681	0.833	0
PS160120	Episodic ataxia	pericyte cell	-0.275353	2	0.801	0.833	0
PS160120	Episodic ataxia	tendon cell	-0.111178	2	0.453	0.833	0
PS160120	Episodic ataxia	stromal cell	1.86566	2	0.012	0.228	0
PS160120	Episodic ataxia	skeletal muscle fibroblast; fibroblast	0.334153	2	0.106	0.671333	0
PS160120	Episodic ataxia	skeletal muscle fibroblast; fibroblast.1	-0.227374	2	0.667	0.833	0
PS160120	Episodic ataxia	myelinating Schwann cell	1.90468	2	0.044	0.418	0
PS160120	Episodic ataxia	smooth muscle cell	-0.275353	2	0.699	0.833	0
PS108600	Spastic ataxia	striated muscle cell	-0.402049	4	0.577	0.968	0
PS108600	Spastic ataxia	macrophage	-0.447912	4	0.877	0.968	0
PS108600	Spastic ataxia	monocyte-derived dendritic cell	-0.282999	4	0.708	0.968	0
PS108600	Spastic ataxia	T-helper 17 cell	-0.5941	4	0.917	0.968	0
PS108600	Spastic ataxia	skeletal muscle satellite cell	-0.111183	4	0.408	0.861333	0
PS108600	Spastic ataxia	CD8-positive, alpha-beta T cell	-0.0421337	4	0.315	0.748125	0
PS108600	Spastic ataxia	B cell	-0.245303	4	0.673	0.968	0
PS108600	Spastic ataxia	endothelial cell of lymphatic vessel	0.180466	4	0.193	0.611167	0
PS108600	Spastic ataxia	vein endothelial cell; endothelial stalk cell	0.488852	4	0.06	0.5586	0
PS108600	Spastic ataxia	endothelial cell of artery	0.24405	4	0.117	0.5586	0
PS108600	Spastic ataxia	capillary endothelial cell	0.536567	4	0.091	0.5586	0
PS108600	Spastic ataxia	blood vessel endothelial cell	0.115656	4	0.144	0.5586	0
PS108600	Spastic ataxia	pericyte cell	0.0571348	4	0.297	0.748125	0
PS108600	Spastic ataxia	tendon cell	-0.295851	4	0.786	0.968	0
PS108600	Spastic ataxia	stromal cell	-0.287236	4	0.775	0.968	0
PS108600	Spastic ataxia	skeletal muscle fibroblast; fibroblast	-0.446218	4	0.941	0.968	0
PS108600	Spastic ataxia	skeletal muscle fibroblast; fibroblast.1	-0.507208	4	0.968	0.968	0
PS108600	Spastic ataxia	myelinating Schwann cell	-0.366742	4	0.895	0.968	0
PS108600	Spastic ataxia	smooth muscle cell	0.42797	4	0.147	0.5586	0
PS164400	Spinocerebellar ataxia	striated muscle cell	-0.960871	9	0.964	0.997	0
PS164400	Spinocerebellar ataxia	macrophage	-0.38489	9	0.898	0.997	0
PS164400	Spinocerebellar ataxia	monocyte-derived dendritic cell	-0.653171	9	0.987	0.997	0
PS164400	Spinocerebellar ataxia	T-helper 17 cell	-0.513276	9	0.938	0.997	0
PS164400	Spinocerebellar ataxia	skeletal muscle satellite cell	-0.447146	9	0.915	0.997	0
PS164400	Spinocerebellar ataxia	CD8-positive, alpha-beta T cell	-0.348554	9	0.762	0.997	0
PS164400	Spinocerebellar ataxia	B cell	-0.513276	9	0.96	0.997	0
PS164400	Spinocerebellar ataxia	endothelial cell of lymphatic vessel	0.0468524	9	0.091	0.247	0
PS164400	Spinocerebellar ataxia	vein endothelial cell; endothelial stalk cell	0.421973	9	0.01	0.06175	0
PS164400	Spinocerebellar ataxia	endothelial cell of artery	-0.0646414	9	0.732	0.997	0
PS164400	Spinocerebellar ataxia	capillary endothelial cell	-0.447146	9	0.997	0.997	0
PS164400	Spinocerebellar ataxia	blood vessel endothelial cell	-0.225668	9	0.763	0.997	0
PS164400	Spinocerebellar ataxia	pericyte cell	0.161807	9	0.053	0.167833	0
PS164400	Spinocerebellar ataxia	tendon cell	0.0452642	9	0.013	0.06175	0
PS164400	Spinocerebellar ataxia	stromal cell	0.0412438	9	0.046	0.167833	0
PS164400	Spinocerebellar ataxia	skeletal muscle fibroblast; fibroblast	0.173444	9	0.004	0.038	0
PS164400	Spinocerebellar ataxia	skeletal muscle fibroblast; fibroblast.1	-0.312953	9	0.907	0.997	0
PS164400	Spinocerebellar ataxia	myelinating Schwann cell	-0.513276	9	0.989	0.997	0
PS164400	Spinocerebellar ataxia	smooth muscle cell	1.56666	9	0.002	0.038	1
112250	Diaphyseal Medullary Stenosis With Malignant Fibrous Histiocytoma	striated muscle cell	-0.930279	1	0.735	0.956	0
112250	Diaphyseal Medullary Stenosis With Malignant Fibrous Histiocytoma	macrophage	-0.772219	1	0.916	0.956	0
112250	Diaphyseal Medullary Stenosis With Malignant Fibrous Histiocytoma	monocyte-derived dendritic cell	-0.83186	1	0.9	0.956	0
112250	Diaphyseal Medullary Stenosis With Malignant Fibrous Histiocytoma	T-helper 17 cell	0.40811	1	0.184	0.499429	0
112250	Diaphyseal Medullary Stenosis With Malignant Fibrous Histiocytoma	skeletal muscle satellite cell	-0.790651	1	0.906	0.956	0
112250	Diaphyseal Medullary Stenosis With Malignant Fibrous Histiocytoma	CD8-positive, alpha-beta T cell	1.00255	1	0.044	0.418	0
112250	Diaphyseal Medullary Stenosis With Malignant Fibrous Histiocytoma	B cell	0.564094	1	0.114	0.4902	0
112250	Diaphyseal Medullary Stenosis With Malignant Fibrous Histiocytoma	endothelial cell of lymphatic vessel	0.839753	1	0.129	0.4902	0
112250	Diaphyseal Medullary Stenosis With Malignant Fibrous Histiocytoma	vein endothelial cell; endothelial stalk cell	0.96428	1	0.095	0.4902	0
112250	Diaphyseal Medullary Stenosis With Malignant Fibrous Histiocytoma	endothelial cell of artery	-0.186593	1	0.644	0.956	0
112250	Diaphyseal Medullary Stenosis With Malignant Fibrous Histiocytoma	capillary endothelial cell	0.817224	1	0.158	0.499429	0
112250	Diaphyseal Medullary Stenosis With Malignant Fibrous Histiocytoma	blood vessel endothelial cell	-0.696441	1	0.903	0.956	0
112250	Diaphyseal Medullary Stenosis With Malignant Fibrous Histiocytoma	pericyte cell	2.8288	1	0.011	0.209	0
112250	Diaphyseal Medullary Stenosis With Malignant Fibrous Histiocytoma	tendon cell	-0.318901	1	0.66	0.956	0
112250	Diaphyseal Medullary Stenosis With Malignant Fibrous Histiocytoma	stromal cell	-0.8083	1	0.897	0.956	0
112250	Diaphyseal Medullary Stenosis With Malignant Fibrous Histiocytoma	skeletal muscle fibroblast; fibroblast	-0.462828	1	0.792	0.956	0
112250	Diaphyseal Medullary Stenosis With Malignant Fibrous Histiocytoma	skeletal muscle fibroblast; fibroblast.1	-0.512128	1	0.858	0.956	0
112250	Diaphyseal Medullary Stenosis With Malignant Fibrous Histiocytoma	myelinating Schwann cell	0.168542	1	0.298	0.70775	0
112250	Diaphyseal Medullary Stenosis With Malignant Fibrous Histiocytoma	smooth muscle cell	-1.28316	1	0.956	0.956	0
114290	Campomelic Dysplasia	striated muscle cell	-0.554054	1	0.607	0.908	0
114290	Campomelic Dysplasia	macrophage	-0.539513	1	0.794	0.908	0
114290	Campomelic Dysplasia	monocyte-derived dendritic cell	-0.357252	1	0.665	0.908	0
114290	Campomelic Dysplasia	T-helper 17 cell	-0.554054	1	0.754	0.908	0
114290	Campomelic Dysplasia	skeletal muscle satellite cell	1.76138	1	0.025	0.2375	0
114290	Campomelic Dysplasia	CD8-positive, alpha-beta T cell	-0.503613	1	0.707	0.908	0
114290	Campomelic Dysplasia	B cell	-0.475927	1	0.731	0.908	0
114290	Campomelic Dysplasia	endothelial cell of lymphatic vessel	-0.302437	1	0.741	0.908	0
114290	Campomelic Dysplasia	vein endothelial cell; endothelial stalk cell	-0.425716	1	0.774	0.908	0
114290	Campomelic Dysplasia	endothelial cell of artery	-0.554054	1	0.879	0.908	0
114290	Campomelic Dysplasia	capillary endothelial cell	-0.535033	1	0.898	0.908	0
114290	Campomelic Dysplasia	blood vessel endothelial cell	-0.498189	1	0.809	0.908	0
114290	Campomelic Dysplasia	pericyte cell	-0.554054	1	0.908	0.908	0
114290	Campomelic Dysplasia	tendon cell	-0.0565525	1	0.543	0.908	0
114290	Campomelic Dysplasia	stromal cell	2.59752	1	0.024	0.2375	0
114290	Campomelic Dysplasia	skeletal muscle fibroblast; fibroblast	0.166764	1	0.146	0.6935	0
114290	Campomelic Dysplasia	skeletal muscle fibroblast; fibroblast.1	-0.255122	1	0.653	0.908	0
114290	Campomelic Dysplasia	myelinating Schwann cell	-0.554054	1	0.834	0.908	0
114290	Campomelic Dysplasia	smooth muscle cell	2.19396	1	0.059	0.373667	0
PS115150	Cardiofaciocutaneous syndrome	striated muscle cell	-1.61608	1	0.913	0.989	0
PS115150	Cardiofaciocutaneous syndrome	macrophage	-1.25093	1	0.989	0.989	0
PS115150	Cardiofaciocutaneous syndrome	monocyte-derived dendritic cell	-0.14291	1	0.505	0.973385	0
PS115150	Cardiofaciocutaneous syndrome	T-helper 17 cell	2.35308	1	0.048	0.456	0
PS115150	Cardiofaciocutaneous syndrome	skeletal muscle satellite cell	0.0403092	1	0.173	0.7486	0
PS115150	Cardiofaciocutaneous syndrome	CD8-positive, alpha-beta T cell	-0.832234	1	0.882	0.989	0
PS115150	Cardiofaciocutaneous syndrome	B cell	-0.0491777	1	0.501	0.973385	0
PS115150	Cardiofaciocutaneous syndrome	endothelial cell of lymphatic vessel	-0.192689	1	0.666	0.973385	0
PS115150	Cardiofaciocutaneous syndrome	vein endothelial cell; endothelial stalk cell	-0.0576821	1	0.602	0.973385	0
PS115150	Cardiofaciocutaneous syndrome	endothelial cell of artery	-0.995334	1	0.982	0.989	0
PS115150	Cardiofaciocutaneous syndrome	capillary endothelial cell	-0.347608	1	0.817	0.989	0
PS115150	Cardiofaciocutaneous syndrome	blood vessel endothelial cell	-0.275927	1	0.65	0.973385	0
PS115150	Cardiofaciocutaneous syndrome	pericyte cell	2.22151	1	0.031	0.456	0
PS115150	Cardiofaciocutaneous syndrome	tendon cell	-0.145556	1	0.549	0.973385	0
PS115150	Cardiofaciocutaneous syndrome	stromal cell	0.346479	1	0.191	0.7486	0
PS115150	Cardiofaciocutaneous syndrome	skeletal muscle fibroblast; fibroblast	-0.384035	1	0.727	0.986643	0
PS115150	Cardiofaciocutaneous syndrome	skeletal muscle fibroblast; fibroblast.1	-0.13379	1	0.565	0.973385	0
PS115150	Cardiofaciocutaneous syndrome	myelinating Schwann cell	0.608798	1	0.244	0.772667	0
PS115150	Cardiofaciocutaneous syndrome	smooth muscle cell	0.853771	1	0.197	0.7486	0
PS116860	Cerebral cavernous malformations	striated muscle cell	-0.385858	1	0.562	0.923611	0
PS116860	Cerebral cavernous malformations	macrophage	-0.402543	1	0.692	0.923611	0
PS116860	Cerebral cavernous malformations	monocyte-derived dendritic cell	-0.458881	1	0.718	0.923611	0
PS116860	Cerebral cavernous malformations	T-helper 17 cell	-0.401478	1	0.699	0.923611	0
PS116860	Cerebral cavernous malformations	skeletal muscle satellite cell	-0.688771	1	0.875	0.923611	0
PS116860	Cerebral cavernous malformations	CD8-positive, alpha-beta T cell	-0.568973	1	0.75	0.923611	0
PS116860	Cerebral cavernous malformations	B cell	-0.402728	1	0.693	0.923611	0
PS116860	Cerebral cavernous malformations	endothelial cell of lymphatic vessel	1.14357	1	0.089	0.563667	0
PS116860	Cerebral cavernous malformations	vein endothelial cell; endothelial stalk cell	-0.0929385	1	0.62	0.923611	0
PS116860	Cerebral cavernous malformations	endothelial cell of artery	0.108682	1	0.264	0.923611	0
PS116860	Cerebral cavernous malformations	capillary endothelial cell	-0.409039	1	0.823	0.923611	0
PS116860	Cerebral cavernous malformations	blood vessel endothelial cell	-0.347148	1	0.682	0.923611	0
PS116860	Cerebral cavernous malformations	pericyte cell	1.90864	1	0.052	0.494	0
PS116860	Cerebral cavernous malformations	tendon cell	-0.83427	1	0.959	0.959	0
PS116860	Cerebral cavernous malformations	stromal cell	-0.584439	1	0.832	0.923611	0
PS116860	Cerebral cavernous malformations	skeletal muscle fibroblast; fibroblast	-0.306836	1	0.681	0.923611	0
PS116860	Cerebral cavernous malformations	skeletal muscle fibroblast; fibroblast.1	-0.0872636	1	0.555	0.923611	0
PS116860	Cerebral cavernous malformations	myelinating Schwann cell	3.13862	1	0.032	0.494	0
PS116860	Cerebral cavernous malformations	smooth muscle cell	-0.328345	1	0.709	0.923611	0
117000	Central Core Disease Of Muscle	striated muscle cell	1.62619	1	0.057	0.5415	0
117000	Central Core Disease Of Muscle	macrophage	-0.109111	1	0.527	0.828	0
117000	Central Core Disease Of Muscle	monocyte-derived dendritic cell	3.62602	1	0.004	0.076	1
117000	Central Core Disease Of Muscle	T-helper 17 cell	-0.383622	1	0.663	0.828	0
117000	Central Core Disease Of Muscle	skeletal muscle satellite cell	-0.290522	1	0.595	0.828	0
117000	Central Core Disease Of Muscle	CD8-positive, alpha-beta T cell	-0.383622	1	0.629	0.828	0
117000	Central Core Disease Of Muscle	B cell	0.374642	1	0.163	0.828	0
117000	Central Core Disease Of Muscle	endothelial cell of lymphatic vessel	-0.383622	1	0.813	0.828	0
117000	Central Core Disease Of Muscle	vein endothelial cell; endothelial stalk cell	-0.383622	1	0.767	0.828	0
117000	Central Core Disease Of Muscle	endothelial cell of artery	-0.383622	1	0.778	0.828	0
117000	Central Core Disease Of Muscle	capillary endothelial cell	-0.383622	1	0.828	0.828	0
117000	Central Core Disease Of Muscle	blood vessel endothelial cell	-0.383622	1	0.715	0.828	0
117000	Central Core Disease Of Muscle	pericyte cell	-0.383622	1	0.784	0.828	0
117000	Central Core Disease Of Muscle	tendon cell	-0.383622	1	0.701	0.828	0
117000	Central Core Disease Of Muscle	stromal cell	-0.383622	1	0.724	0.828	0
117000	Central Core Disease Of Muscle	skeletal muscle fibroblast; fibroblast	-0.383622	1	0.756	0.828	0
117000	Central Core Disease Of Muscle	skeletal muscle fibroblast; fibroblast.1	-0.240136	1	0.628	0.828	0
117000	Central Core Disease Of Muscle	myelinating Schwann cell	-0.383622	1	0.781	0.828	0
117000	Central Core Disease Of Muscle	smooth muscle cell	-0.383622	1	0.716	0.828	0
117300	Dementia, Familial Danish	striated muscle cell	-1.48587	1	0.883	0.994	0
117300	Dementia, Familial Danish	macrophage	2.15491	1	0.026	0.396889	0
117300	Dementia, Familial Danish	monocyte-derived dendritic cell	-1.02802	1	0.965	0.994	0
117300	Dementia, Familial Danish	T-helper 17 cell	-0.543116	1	0.789	0.994	0
117300	Dementia, Familial Danish	skeletal muscle satellite cell	-1.30129	1	0.992	0.994	0
117300	Dementia, Familial Danish	CD8-positive, alpha-beta T cell	-1.24513	1	0.971	0.994	0
117300	Dementia, Familial Danish	B cell	-1.48823	1	0.994	0.994	0
117300	Dementia, Familial Danish	endothelial cell of lymphatic vessel	-0.138862	1	0.639	0.994	0
117300	Dementia, Familial Danish	vein endothelial cell; endothelial stalk cell	0.112615	1	0.231	0.399	0
117300	Dementia, Familial Danish	endothelial cell of artery	0.818012	1	0.108	0.396889	0
117300	Dementia, Familial Danish	capillary endothelial cell	1.2038	1	0.09	0.396889	0
117300	Dementia, Familial Danish	blood vessel endothelial cell	0.597594	1	0.135	0.396889	0
117300	Dementia, Familial Danish	pericyte cell	0.362736	1	0.213	0.399	0
117300	Dementia, Familial Danish	tendon cell	0.37329	1	0.117	0.396889	0
117300	Dementia, Familial Danish	stromal cell	0.481862	1	0.165	0.396889	0
117300	Dementia, Familial Danish	skeletal muscle fibroblast; fibroblast	0.609335	1	0.077	0.396889	0
117300	Dementia, Familial Danish	skeletal muscle fibroblast; fibroblast.1	0.15583	1	0.185	0.396889	0
117300	Dementia, Familial Danish	myelinating Schwann cell	-0.478202	1	0.786	0.994	0
117300	Dementia, Familial Danish	smooth muscle cell	0.838733	1	0.188	0.396889	0
PS117550	Sotos syndrome	striated muscle cell	-0.791916	2	0.777	0.969	0
PS117550	Sotos syndrome	macrophage	0.0665367	2	0.236	0.656857	0
PS117550	Sotos syndrome	monocyte-derived dendritic cell	-0.307526	2	0.652	0.952923	0
PS117550	Sotos syndrome	T-helper 17 cell	0.552483	2	0.167	0.656857	0
PS117550	Sotos syndrome	skeletal muscle satellite cell	-0.304151	2	0.621	0.952923	0
PS117550	Sotos syndrome	CD8-positive, alpha-beta T cell	-0.267022	2	0.565	0.952923	0
PS117550	Sotos syndrome	B cell	0.127959	2	0.242	0.656857	0
PS117550	Sotos syndrome	endothelial cell of lymphatic vessel	-0.450303	2	0.905	0.969	0
PS117550	Sotos syndrome	vein endothelial cell; endothelial stalk cell	-0.535831	2	0.918	0.969	0
PS117550	Sotos syndrome	endothelial cell of artery	-0.624744	2	0.978	0.978	0
PS117550	Sotos syndrome	capillary endothelial cell	0.319866	2	0.282	0.66975	0
PS117550	Sotos syndrome	blood vessel endothelial cell	-0.159118	2	0.533	0.952923	0
PS117550	Sotos syndrome	pericyte cell	-0.0567483	2	0.582	0.952923	0
PS117550	Sotos syndrome	tendon cell	1.18685	2	0.023	0.2185	0
PS117550	Sotos syndrome	stromal cell	-0.504773	2	0.848	0.969	0
PS117550	Sotos syndrome	skeletal muscle fibroblast; fibroblast	0.795523	2	0.022	0.2185	0
PS117550	Sotos syndrome	skeletal muscle fibroblast; fibroblast.1	0.691009	2	0.071	0.449667	0
PS117550	Sotos syndrome	myelinating Schwann cell	0.949671	2	0.204	0.656857	0
PS117550	Sotos syndrome	smooth muscle cell	-0.68777	2	0.914	0.969	0
117650	Cerebrocostomandibular Syndrome	striated muscle cell	-0.0211063	1	0.451	0.979	0
117650	Cerebrocostomandibular Syndrome	macrophage	-1.04191	1	0.971	0.979	0
117650	Cerebrocostomandibular Syndrome	monocyte-derived dendritic cell	-0.410003	1	0.673	0.979	0
117650	Cerebrocostomandibular Syndrome	T-helper 17 cell	-0.328563	1	0.64	0.979	0
117650	Cerebrocostomandibular Syndrome	skeletal muscle satellite cell	1.61703	1	0.021	0.2755	0
117650	Cerebrocostomandibular Syndrome	CD8-positive, alpha-beta T cell	-1.35178	1	0.979	0.979	0
117650	Cerebrocostomandibular Syndrome	B cell	-0.312663	1	0.615	0.979	0
117650	Cerebrocostomandibular Syndrome	endothelial cell of lymphatic vessel	2.00291	1	0.029	0.2755	0
117650	Cerebrocostomandibular Syndrome	vein endothelial cell; endothelial stalk cell	-0.25785	1	0.653	0.979	0
117650	Cerebrocostomandibular Syndrome	endothelial cell of artery	0.377772	1	0.185	0.646	0
117650	Cerebrocostomandibular Syndrome	capillary endothelial cell	0.532299	1	0.204	0.646	0
117650	Cerebrocostomandibular Syndrome	blood vessel endothelial cell	-0.385306	1	0.753	0.979	0
117650	Cerebrocostomandibular Syndrome	pericyte cell	1.23453	1	0.107	0.50825	0
117650	Cerebrocostomandibular Syndrome	tendon cell	-0.291563	1	0.644	0.979	0
117650	Cerebrocostomandibular Syndrome	stromal cell	-0.816711	1	0.914	0.979	0
117650	Cerebrocostomandibular Syndrome	skeletal muscle fibroblast; fibroblast	-0.848666	1	0.971	0.979	0
117650	Cerebrocostomandibular Syndrome	skeletal muscle fibroblast; fibroblast.1	-0.512775	1	0.861	0.979	0
117650	Cerebrocostomandibular Syndrome	myelinating Schwann cell	-0.98109	1	0.952	0.979	0
117650	Cerebrocostomandibular Syndrome	smooth muscle cell	1.79545	1	0.076	0.481333	0
PS118220	Charcot-Marie-Tooth disease	striated muscle cell	-0.495154	35	0.872	0.999	0
PS118220	Charcot-Marie-Tooth disease	macrophage	-0.23029	35	0.858	0.999	0
PS118220	Charcot-Marie-Tooth disease	monocyte-derived dendritic cell	-0.420658	35	0.99	0.999	0
PS118220	Charcot-Marie-Tooth disease	T-helper 17 cell	-0.533058	35	0.999	0.999	0
PS118220	Charcot-Marie-Tooth disease	skeletal muscle satellite cell	-0.266711	35	0.82	0.999	0
PS118220	Charcot-Marie-Tooth disease	CD8-positive, alpha-beta T cell	-0.610626	35	0.999	0.999	0
PS118220	Charcot-Marie-Tooth disease	B cell	-0.513276	35	0.999	0.999	0
PS118220	Charcot-Marie-Tooth disease	endothelial cell of lymphatic vessel	0.0286185	35	0.007	0.016625	0
PS118220	Charcot-Marie-Tooth disease	vein endothelial cell; endothelial stalk cell	0.0481747	35	0.001	0.00475	0
PS118220	Charcot-Marie-Tooth disease	endothelial cell of artery	0.123143	35	0.001	0.00475	0
PS118220	Charcot-Marie-Tooth disease	capillary endothelial cell	0.141109	35	0.003	0.0095	0
PS118220	Charcot-Marie-Tooth disease	blood vessel endothelial cell	0.0239765	35	0	0	0
PS118220	Charcot-Marie-Tooth disease	pericyte cell	0.0457741	35	0.005	0.0135714	0
PS118220	Charcot-Marie-Tooth disease	tendon cell	-0.230093	35	0.861	0.999	0
PS118220	Charcot-Marie-Tooth disease	stromal cell	-0.23029	35	0.936	0.999	0
PS118220	Charcot-Marie-Tooth disease	skeletal muscle fibroblast; fibroblast	-0.229803	35	0.901	0.999	0
PS118220	Charcot-Marie-Tooth disease	skeletal muscle fibroblast; fibroblast.1	-0.23927	35	0.936	0.999	0
PS118220	Charcot-Marie-Tooth disease	myelinating Schwann cell	0.358776	35	0.003	0.0095	0
PS118220	Charcot-Marie-Tooth disease	smooth muscle cell	0.160675	35	0.001	0.00475	0
PS128100	Dystonia	striated muscle cell	-0.992204	9	0.965	0.965	0
PS128100	Dystonia	macrophage	-0.320871	9	0.836	0.965	0
PS128100	Dystonia	monocyte-derived dendritic cell	-0.34202	9	0.804	0.965	0
PS128100	Dystonia	T-helper 17 cell	-0.43049	9	0.885	0.965	0
PS128100	Dystonia	skeletal muscle satellite cell	-0.518724	9	0.961	0.965	0
PS128100	Dystonia	CD8-positive, alpha-beta T cell	-0.459404	9	0.879	0.965	0
PS128100	Dystonia	B cell	-0.483875	9	0.947	0.965	0
PS128100	Dystonia	endothelial cell of lymphatic vessel	-0.186364	9	0.853	0.965	0
PS128100	Dystonia	vein endothelial cell; endothelial stalk cell	0.021619	9	0.054	0.323	0
PS128100	Dystonia	endothelial cell of artery	-0.217619	9	0.821	0.965	0
PS128100	Dystonia	capillary endothelial cell	0.234953	9	0.068	0.323	0
PS128100	Dystonia	blood vessel endothelial cell	-0.148263	9	0.663	0.965	0
PS128100	Dystonia	pericyte cell	0.288107	9	0.035	0.323	0
PS128100	Dystonia	tendon cell	-0.266401	9	0.798	0.965	0
PS128100	Dystonia	stromal cell	-0.0240635	9	0.627	0.965	0
PS128100	Dystonia	skeletal muscle fibroblast; fibroblast	-0.117857	9	0.573	0.965	0
PS128100	Dystonia	skeletal muscle fibroblast; fibroblast.1	-0.251616	9	0.818	0.965	0
PS128100	Dystonia	myelinating Schwann cell	0.462257	9	0.047	0.323	0
PS128100	Dystonia	smooth muscle cell	0.051211	9	0.085	0.323	0
121300	Coproporphyria	striated muscle cell	-1.15908	1	0.821	0.99	0
121300	Coproporphyria	macrophage	-0.47439	1	0.762	0.99	0
121300	Coproporphyria	monocyte-derived dendritic cell	-1.0071	1	0.951	0.99	0
121300	Coproporphyria	T-helper 17 cell	1.88121	1	0.061	0.437	0
121300	Coproporphyria	skeletal muscle satellite cell	-1.0123	1	0.956	0.99	0
121300	Coproporphyria	CD8-positive, alpha-beta T cell	0.148785	1	0.138	0.437	0
121300	Coproporphyria	B cell	0.846227	1	0.109	0.437	0
121300	Coproporphyria	endothelial cell of lymphatic vessel	-0.596873	1	0.896	0.99	0
121300	Coproporphyria	vein endothelial cell; endothelial stalk cell	-0.467172	1	0.84	0.99	0
121300	Coproporphyria	endothelial cell of artery	-1.15228	1	0.99	0.99	0
121300	Coproporphyria	capillary endothelial cell	0.134019	1	0.279	0.7125	0
121300	Coproporphyria	blood vessel endothelial cell	-0.402002	1	0.745	0.99	0
121300	Coproporphyria	pericyte cell	-0.340089	1	0.794	0.99	0
121300	Coproporphyria	tendon cell	0.251578	1	0.124	0.437	0
121300	Coproporphyria	stromal cell	2.2941	1	0.025	0.437	0
121300	Coproporphyria	skeletal muscle fibroblast; fibroblast	-0.0623348	1	0.503	0.99	0
121300	Coproporphyria	skeletal muscle fibroblast; fibroblast.1	-0.569441	1	0.878	0.99	0
121300	Coproporphyria	myelinating Schwann cell	0.195427	1	0.3	0.7125	0
121300	Coproporphyria	smooth muscle cell	1.49172	1	0.109	0.437	0
PS122470	Cornelia de Lange syndrome	striated muscle cell	-2.54514	1	0.996	0.996	0
PS122470	Cornelia de Lange syndrome	macrophage	1.2614	1	0.08	0.399	0
PS122470	Cornelia de Lange syndrome	monocyte-derived dendritic cell	-0.356073	1	0.672	0.980176	0
PS122470	Cornelia de Lange syndrome	T-helper 17 cell	-0.68117	1	0.79	0.980176	0
PS122470	Cornelia de Lange syndrome	skeletal muscle satellite cell	1.73953	1	0.027	0.399	0
PS122470	Cornelia de Lange syndrome	CD8-positive, alpha-beta T cell	0.141691	1	0.155	0.399	0
PS122470	Cornelia de Lange syndrome	B cell	0.32265	1	0.162	0.399	0
PS122470	Cornelia de Lange syndrome	endothelial cell of lymphatic vessel	0.810098	1	0.135	0.399	0
PS122470	Cornelia de Lange syndrome	vein endothelial cell; endothelial stalk cell	0.647978	1	0.152	0.399	0
PS122470	Cornelia de Lange syndrome	endothelial cell of artery	0.345287	1	0.189	0.399	0
PS122470	Cornelia de Lange syndrome	capillary endothelial cell	0.569276	1	0.177	0.399	0
PS122470	Cornelia de Lange syndrome	blood vessel endothelial cell	-0.230727	1	0.624	0.980176	0
PS122470	Cornelia de Lange syndrome	pericyte cell	-0.252603	1	0.723	0.980176	0
PS122470	Cornelia de Lange syndrome	tendon cell	-0.353679	1	0.684	0.980176	0
PS122470	Cornelia de Lange syndrome	stromal cell	-0.848173	1	0.877	0.980176	0
PS122470	Cornelia de Lange syndrome	skeletal muscle fibroblast; fibroblast	-0.319064	1	0.681	0.980176	0
PS122470	Cornelia de Lange syndrome	skeletal muscle fibroblast; fibroblast.1	-0.545189	1	0.866	0.980176	0
PS122470	Cornelia de Lange syndrome	myelinating Schwann cell	1.42504	1	0.13	0.399	0
PS122470	Cornelia de Lange syndrome	smooth muscle cell	-1.13113	1	0.932	0.983778	0
PS123000	Craniometaphyseal dysplasia	striated muscle cell	0.0805918	2	0.216	0.711143	0
PS123000	Craniometaphyseal dysplasia	macrophage	-0.52573	2	0.879	0.978	0
PS123000	Craniometaphyseal dysplasia	monocyte-derived dendritic cell	-0.271373	2	0.612	0.978	0
PS123000	Craniometaphyseal dysplasia	T-helper 17 cell	-0.272322	2	0.629	0.978	0
PS123000	Craniometaphyseal dysplasia	skeletal muscle satellite cell	-0.607021	2	0.893	0.978	0
PS123000	Craniometaphyseal dysplasia	CD8-positive, alpha-beta T cell	-0.825423	2	0.95	0.978	0
PS123000	Craniometaphyseal dysplasia	B cell	-0.855823	2	0.972	0.978	0
PS123000	Craniometaphyseal dysplasia	endothelial cell of lymphatic vessel	0.288388	2	0.262	0.711143	0
PS123000	Craniometaphyseal dysplasia	vein endothelial cell; endothelial stalk cell	0.381219	2	0.214	0.711143	0
PS123000	Craniometaphyseal dysplasia	endothelial cell of artery	0.0683661	2	0.353	0.745222	0
PS123000	Craniometaphyseal dysplasia	capillary endothelial cell	-0.185768	2	0.731	0.978	0
PS123000	Craniometaphyseal dysplasia	blood vessel endothelial cell	0.944623	2	0.049	0.4655	0
PS123000	Craniometaphyseal dysplasia	pericyte cell	-0.691593	2	0.978	0.978	0
PS123000	Craniometaphyseal dysplasia	tendon cell	1.31715	2	0.027	0.4655	0
PS123000	Craniometaphyseal dysplasia	stromal cell	0.884925	2	0.1	0.633333	0
PS123000	Craniometaphyseal dysplasia	skeletal muscle fibroblast; fibroblast	0.0677908	2	0.229	0.711143	0
PS123000	Craniometaphyseal dysplasia	skeletal muscle fibroblast; fibroblast.1	-0.425404	2	0.862	0.978	0
PS123000	Craniometaphyseal dysplasia	myelinating Schwann cell	0.2839	2	0.401	0.7619	0
[truncated: 14,061 more rows]

## Sheet: Spleen
Supplementary File 6D. Diseases and their PrEDiCT scores across cell types in spleen.
[truncated: 1,696 more rows]

[truncated: 2 more sheets: Tongue, Trachea]
