# Supplementary material for: Affected cell types for hundreds of Mendelian diseases revealed by analysis of human and mouse single-cell data
Source: eLife. 2024 Jan 10;13:e84613. doi: 10.7554/eLife.84613 (PMC10830129; doi:10.7554/eLife.84613)
Supplement: Supplementary file 7. [file elife-84613-supp7.xlsx]

## Sheet: Supplementary File 7
Supplementary File 7. Tissues affected by heritable cancers.
Gene symbol	Germline	Tumor types (Germline)	Role in cancer	Affected tissues
ATM	yes	leukaemia, lymphoma, medulloblastoma, glioma	Tumor suppressor gene	Bone marrow, Spleen
ATR	yes	oropharyngeal	Tumor suppressor gene	Tongue
BLM	yes	leukaemia, lymphoma, skin squamous cell, other tumour types	Tumor suppressor gene	Bone marrow, Spleen
BRCA2	yes	breast, ovarian, pancreatic, leukaemia (FANCB, FANCD1)	Tumor suppressor gene	Bone marrow
BRIP1	yes	AML, leukaemia, breast	Tumor suppressor gene	Bone marrow
BUB1B	yes	rhabdomyosarcoma	Tumor suppressor gene	Skeletal muscle
DICER1	yes	pleuropulmonary blastoma	Tumor suppressor gene	Lung
EGFR	yes	NSCLC	Oncogene	Lung, Trachea
FANCA	yes	AML, leukaemia	Tumor suppressor gene	Bone marrow
FANCC	yes	AML, leukaemia	Tumor suppressor gene	Bone marrow
FANCD2	yes	AML, leukaemia	Tumor suppressor gene	Bone marrow
FANCE	yes	AML, leukaemia	Tumor suppressor gene	Bone marrow
FANCF	yes	AML, leukaemia	Tumor suppressor gene	Bone marrow
FANCG	yes	AML, leukaemia	Tumor suppressor gene	Bone marrow
HRAS	yes	rhabdomyosarcoma, ganglioneuroblastoma, bladder	Oncogene	Skeletal muscle
MPL	yes	MPN	Oncogene	Bone marrow
NBN	yes	NHL, glioma, medulloblastoma, rhabdomyosarcoma	Tumor suppressor gene	Bone marrow, Spleen, Skeletal muscle
PALB2	yes	Wilms tumour, medulloblastoma, AML ,breast	Tumor suppressor gene	Bone marrow
PRF1	yes	various leukaemia, lymphoma	Tumor suppressor gene	Bone marrow, Spleen
RB1	yes	retinoblastoma, sarcoma, breast, small cell lung carcinoma	Tumor suppressor gene	Lung, Trachea
SBDS	yes	AML, MDS	Tumor suppressor gene	Bone marrow
SMARCB1	yes	malignant rhabdoid	Tumor suppressor gene	Skeletal muscle
STAT3	yes	paediatric large granular lymphocytic leukaemia	Oncogene	Bone marrow, Spleen
TP63	yes	NSCLC	Oncogene, Tumor suppressor gene	Lung, Trachea
WAS	yes	lymphoma	Oncogene	Bone marrow, Spleen
