# Supplementary material for: Affected cell types for hundreds of Mendelian diseases revealed by analysis of human and mouse single-cell data
Source: eLife. 2024 Jan 10;13:e84613. doi: 10.7554/eLife.84613 (PMC10830129; doi:10.7554/eLife.84613)
Supplement: Supplementary file 8. [file elife-84613-supp8.xlsx]

## Sheet: Supplementary File 8
Supplementary File 8. Prevalence, susceptibility and classes of cell types.
Cell type name	Tissue	Cell type prevalence	Cell-type susceptibility	Cell class
cd8.positive..alpha.beta.t.cell	Lung	0.0176874	0.0574713	Immunocytes
cd4.positive..alpha.beta.t.cell	Lung	0.0192421	0.0344828	Immunocytes
adventitial.cell	Lung	0.0021706	0.0689655	Others
alveolar.fibroblast	Lung	0.00689311	0.0804598	Fibroblasts
b.cell	Lung	0.00240526	0.0229885	Immunocytes
basal.cell	Lung	0.0602781	0	Epithelia
basophil	Lung	0.019858	0.0114943	Immunocytes
bronchial.smooth.muscle.cell	Lung	0.00196527	0.0229885	Myocytes
bronchial.vessel.endothelial.cell	Lung	0.00137862	0.0344828	Endothelia
capillary.aerocyte	Lung	0.0155755	0.0344828	Endothelia
capillary.endothelial.cell	Lung	0.0247272	0.0574713	Endothelia
classical.monocyte	Lung	0.040772	0.0344828	Immunocytes
club.cell	Lung	0.030007	0.0229885	Epithelia
dendritic.cell	Lung	0.00815441	0.0229885	Immunocytes
endothelial.cell.of.artery	Lung	0.00472252	0.0344828	Endothelia
endothelial.cell.of.lymphatic.vessel	Lung	0.00105597	0.0344828	Endothelia
fibroblast	Lung	0.000263992	0	Fibroblasts
intermediate.monocyte	Lung	0.00739176	0.045977	Immunocytes
lung.ciliated.cell	Lung	0.0166315	0.0344828	Epithelia
lung.microvascular.endothelial.cell	Lung	0.0140795	0.0229885	Endothelia
macrophage	Lung	0.352986	0.0344828	Immunocytes
mesothelial.cell	Lung	0.000469318	0.0114943	Epithelia
myofibroblast.cell	Lung	0.000293324	0	Fibroblasts
neutrophil	Lung	0.00404787	0.0344828	Immunocytes
nk.cell	Lung	0.00369588	0.0229885	Immunocytes
non.classical.monocyte	Lung	0.0293031	0.0229885	Immunocytes
pericyte.cell	Lung	0.00571982	0.0229885	Others
plasma.cell	Lung	0.00366655	0	Immunocytes
plasmacytoid.dendritic.cell	Lung	0.000498651	0.0114943	Immunocytes
pulmonary.ionocyte	Lung	0.000557315	0.0229885	Epithelia
respiratory.goblet.cell	Lung	0.0211487	0.0114943	Epithelia
respiratory.mucous.cell	Lung	0.000234659	0.0344828	Epithelia
serous.cell.of.epithelium.of.bronchus	Lung	0.000381321	0	Epithelia
smooth.muscle.cell	Lung	0.00073331	0	Myocytes
type.i.pneumocyte	Lung	0.00598381	0.0114943	Epithelia
type.ii.pneumocyte	Lung	0.258917	0.0229885	Epithelia
vascular.associated.smooth.muscle.cell	Lung	0.0020826	0.0229885	Myocytes
vein.endothelial.cell	Lung	0.0140209	0.0344828	Endothelia
cd4.positive..alpha.beta.t.cell	Bone marrow	0.168782	0.0608696	Immunocytes
cd8.positive..alpha.beta.t.cell	Bone marrow	0.0841411	0.0521739	Immunocytes
cd24.neutrophil	Bone marrow	0.211052	0.0347826	Immunocytes
erythrocyte	Bone marrow	0.00859398	0.191304	Others
erythroid.progenitor	Bone marrow	0.0669531	0.130435	Stem cells
granulocyte	Bone marrow	0.0780454	0.0434783	Immunocytes
hematopoietic.stem.cell	Bone marrow	0.0434696	0.026087	Stem cells
macrophage	Bone marrow	0.0263815	0.0521739	Immunocytes
memory.b.cell	Bone marrow	0.0287799	0.026087	Immunocytes
monocyte	Bone marrow	0.107225	0.0782609	Immunocytes
myeloid.progenitor	Bone marrow	0.0253822	0.130435	Stem cells
naive.b.cell	Bone marrow	0.00959328	0.0173913	Immunocytes
nampt.neutrophil	Bone marrow	0.0387729	0.0608696	Immunocytes
neutrophil	Bone marrow	0.00729489	0.0608696	Immunocytes
nk.cell	Bone marrow	0.0469671	0.0347826	Immunocytes
plasma.cell	Bone marrow	0.048566	0	Immunocytes
capillary.endothelial.cell	Skeletal muscle	0.0621328	0.0731707	Endothelia
cd4.positive..alpha.beta.t.cell	Skeletal muscle	0.00307357	0.0292683	Immunocytes
cd8.positive..alpha.beta.t.cell	Skeletal muscle	0.00186749	0.0146341	Immunocytes
endothelial.cell.of.artery	Skeletal muscle	0.00505778	0.0243902	Endothelia
endothelial.cell.of.lymphatic.vessel	Skeletal muscle	0.00264561	0.0243902	Endothelia
endothelial.cell.of.vascular.tree	Skeletal muscle	0.111543	0.0390244	Endothelia
erythrocyte	Skeletal muscle	0.000700307	0.0195122	Others
fast.muscle.cell	Skeletal muscle	0.0078201	0.195122	Myocytes
macrophage	Skeletal muscle	0.0576197	0.0390244	Immunocytes
mast.cell	Skeletal muscle	0.000661401	0.0341463	Immunocytes
mature.nk.t.cell	Skeletal muscle	0.00171186	0.0146341	Immunocytes
mesenchymal.stem.cell	Skeletal muscle	0.495078	0.0585366	Stem cells
mesothelial.cell	Skeletal muscle	0.000427966	0.0292683	Epithelia
pericyte.cell	Skeletal muscle	0.058748	0.0390244	Others
skeletal.muscle.satellite.stem.cell	Skeletal muscle	0.164183	0.0536585	Stem cells
slow.muscle.cell	Skeletal muscle	0.00431856	0.141463	Myocytes
smooth.muscle.cell	Skeletal muscle	0.00167296	0.0195122	Myocytes
t.cell	Skeletal muscle	0.0137727	0.0780488	Immunocytes
tendon.cell	Skeletal muscle	0.00696417	0.0731707	Others
cd1c.positive.myeloid.dendritic.cell	Spleen	0.00150678	0.0175439	Immunocytes
cd4.positive..alpha.beta.memory.t.cell	Spleen	0.0521723	0.0350877	Immunocytes
cd8.positive..alpha.beta.memory.t.cell	Spleen	0.124404	0.0526316	Immunocytes
cd8.positive..alpha.beta.t.cell	Spleen	0.00128704	0.0526316	Immunocytes
cd141.positive.myeloid.dendritic.cell	Spleen	0.00147539	0.0175439	Immunocytes
classical.monocyte	Spleen	0.129144	0.0701754	Immunocytes
endothelial.cell	Spleen	0.0179244	0.0526316	Endothelia
erythrocyte	Spleen	0.00514817	0.210526	Others
hematopoietic.stem.cell	Spleen	0.00229156	0.0175439	Stem cells
innate.lymphoid.cell	Spleen	0.0035786	0	Immunocytes
intermediate.monocyte	Spleen	0.00392391	0.0526316	Immunocytes
macrophage	Spleen	0.0411853	0.0701754	Immunocytes
mature.nk.t.cell	Spleen	0.0114578	0	Immunocytes
memory.b.cell	Spleen	0.185711	0.0350877	Immunocytes
naive.b.cell	Spleen	0.0310773	0.0175439	Immunocytes
naive.thymus.derived.cd4.positive..alpha.beta.t.cell	Spleen	0.0364139	0.0350877	Immunocytes
naive.thymus.derived.cd8.positive..alpha.beta.t.cell	Spleen	0.0179872	0.0350877	Immunocytes
neutrophil	Spleen	0.138373	0.0526316	Immunocytes
nk.cell	Spleen	0.061213	0.0175439	Immunocytes
plasma.cell	Spleen	0.0937343	0	Immunocytes
plasmacytoid.dendritic.cell	Spleen	0.00122426	0.0350877	Immunocytes
platelet	Spleen	0.000565043	0.0350877	Others
regulatory.t.cell	Spleen	0.00743973	0.0526316	Immunocytes
type.i.nk.t.cell	Spleen	0.0307634	0.0350877	Immunocytes
basal.cell	Tongue	0.401864	0.05	Epithelia
capillary.endothelial.cell	Tongue	0.0073373	0.25	Endothelia
endothelial.cell.of.artery	Tongue	0.00286155	0.1	Endothelia
endothelial.cell.of.lymphatic.vessel	Tongue	0.00315504	0.05	Endothelia
epithelial.cell	Tongue	0.15511	0.05	Epithelia
fibroblast	Tongue	0.0158486	0.15	Fibroblasts
immune.cell	Tongue	0.118424	0	Immunocytes
keratinocyte	Tongue	0.267738	0.05	Epithelia
pericyte.cell	Tongue	0.00689706	0	Others
schwann.cell	Tongue	0.00073373	0.05	Others
tongue.muscle.cell	Tongue	0.00410889	0.05	Myocytes
vein.endothelial.cell	Tongue	0.0159219	0.2	Endothelia
goblet.cell	Trachea	0.0163572	0.2	Epithelia
b.cell	Trachea	0.0507294	0	Immunocytes
basal.cell	Trachea	0.449492	0	Epithelia
cd4.positive..alpha.beta.t.cell	Trachea	0.00718391	0	Immunocytes
cd8.positive..alpha.beta.t.cell	Trachea	0.0512821	0	Immunocytes
ciliated.cell	Trachea	0.0289567	0	Epithelia
connective.tissue.cell	Trachea	0.0275199	0.2	Others
double.positive..alpha.beta.thymocyte	Trachea	0.00066313	0	Immunocytes
endothelial.cell	Trachea	0.0248674	0.2	Endothelia
fibroblast	Trachea	0.125442	0.2	Fibroblasts
ionocyte	Trachea	0.00132626	0	Epithelia
macrophage	Trachea	0.058687	0	Immunocytes
mast.cell	Trachea	0.00674182	0	Immunocytes
mucus.secreting.cell	Trachea	0.00552608	0	Epithelia
neutrophil	Trachea	0.0803492	0	Immunocytes
plasma.cell	Trachea	0.01271	0	Immunocytes
secretory.cell	Trachea	0.0247569	0	Epithelia
serous.cell.of.epithelium.of.trachea	Trachea	0.00386826	0.2	Epithelia
smooth.muscle.cell	Trachea	0.0091733	0	Myocytes
t.cell	Trachea	0.0143678	0	Immunocytes
