# Supplementary material for: Affected cell types for hundreds of Mendelian diseases revealed by analysis of human and mouse single-cell data
Source: eLife. 2024 Jan 10;13:e84613. doi: 10.7554/eLife.84613 (PMC10830129; doi:10.7554/eLife.84613)
Supplement: Supplementary file 9. [file elife-84613-supp9.xlsx]

## Sheet: Supplementary File 9
Supplementary File 9. The percentage of cells that express a gene per cell type in human tissues.
Percentages of cells expressing a gene with normalized counts ≥0.05. Data per tissue appear in distinct tabs, as follows: 9A Bone marrow, 9B Lung, 9C Skeletal muscle, 9D Spleen, 9E Tongue, and 9F Trachea.

## Sheet: Bone marrow
Supplementary File 9A. The percentage of cells that express a gene per cell type in bone marrow.
Gene symbol	cd4-positive, alpha-beta t cell	cd8-positive, alpha-beta t cell	cd24 neutrophil	erythrocyte	erythroid progenitor	granulocyte	hematopoietic stem cell	macrophage	memory b cell	monocyte	myeloid progenitor	naive b cell	nampt neutrophil	neutrophil	nk cell	plasma cell
DDX11L1	0	0	0	0	0	0	0	0	0	0	0	0	0	0	0	0
WASH7P	0.0592066	0	0	0	0	0.128041	0	0	0	0	0	0	0	0	0	0
MIR6859-1	0	0	0	0	0	0	0	0	0	0	0	0	0	0	0	0
MIR1302-2HG	0	0	0	0	0	0	0.229885	0	0	0	0	0	0	0	0	0
MIR1302-2	0	0	0	0	0	0	0	0	0	0	0	0	0	0	0	0
FAM138A	0	0	0	0	0	0	0	0	0	0	0	0	0	0	0	0
OR4G4P	0	0	0	0	0	0	0	0	0	0	0	0	0	0	0	0
OR4G11P	0	0	0	0	0	0	0	0	0	0	0	0	0	0	0	0
OR4F5	0	0	0	0	0	0	0	0	0	0	0	0	0	0	0	0
AL627309.1	0.17762	0.118765	0.473485	1.16279	0.298507	1.15237	0.45977	0.757576	0.694444	0.652377	0.787402	0	2.31959	1.36986	0.212766	0.205761
AL627309.3	0	0	0	0	0	0	0	0	0	0.186393	0	0	0	0	0	0
CICP27	0	0	0.284091	0	0.149254	0	0	0	0	0.0931966	0	0	1.28866	1.36986	0	0.205761
AL627309.6	0.296033	0.118765	8.71212	0	0.149254	4.35339	0.229885	6.43939	0	6.52377	0.393701	0	22.4227	10.9589	0	0.617284
AL627309.7	0	0	0.236742	0	0	0.256082	0	0	0	0.0931966	0	0	0.773196	0	0	0
AL627309.2	0	0	0	0	0	0	0	0	0	0	0	0	0	0	0	0
AL627309.5	0.473653	0.23753	19.9337	0	1.34328	3.84123	0.689655	1.51515	0.347222	6.33737	4.72441	0	31.701	27.3973	0	1.02881
RNU6-1100P	0	0	0	0	0	0	0	0	0	0	0	0	0	0	0	0
AL627309.4	0.0592066	0	0.662879	0	0.149254	0	0	0	0	0	0	0	1.28866	2.73973	0	0
FO538757.1	0	0	0	0	0	0	0.229885	0	0	0	0	0	0	0	0	0
WASH9P	1.30255	2.13777	0.094697	0	5.22388	1.40845	1.14943	1.51515	0	0.55918	0.393701	1.04167	0	0	1.48936	1.02881
MIR6859-2	0	0	0	0	0	0	0	0	0	0	0	0	0	0	0	0
AP006222.1	0.651273	0	2.22538	2.32558	1.64179	4.09731	3.67816	0	0	2.14352	3.14961	0	2.57732	9.58904	0.638298	1.23457
RPL23AP24	0	0	0	0	0	0	0	0	0	0	0	0	0	0	0	0
AL732372.1	0	0	0	0	0	0	0	0	0	0	0	0	0	0	0	0
AL732372.2	0.769686	0.356295	5.87121	1.16279	3.8806	1.92061	1.6092	1.13636	0.347222	2.23672	5.90551	1.04167	10.0515	6.84932	0.851064	0.823045
WBP1LP7	0	0	0	0	0	0	0	0	0	0	0	0	0	0	0	0
OR4F29	0	0	0	0	0	0	0	0	0	0	0	0	0	0	0	0
CICP7	0	0	0	0	0	0	0	0	0	0	0	0	0	0	0	0
AL732372.3	0	0	0.189394	0	0.298507	0.128041	0.229885	0.378788	0	0.0931966	0	0	0	0	0.212766	0.205761
RF00026	0	0	0	0	0	0	0	0	0	0	0	0	0	0	0	0
AL669831.3	0.53286	0	0.236742	0	1.79104	0.384123	0.229885	0	0.347222	0.372787	0.787402	0	0.257732	0	0.425532	0.617284
AC114498.1	0	0	0	0	0	0	0	0	0	0	0	0	0	0	0	0
MTND1P23	12.907	26.6033	7.33902	4.65116	38.6567	41.9974	38.1609	41.6667	27.4306	50.0466	44.0945	54.1667	2.06186	4.10959	22.1277	27.7778
MTND2P28	6.03908	6.4133	11.6477	4.65116	28.3582	33.0346	26.4368	8.71212	11.4583	19.3849	35.8268	5.20833	4.38144	4.10959	4.89362	10.2881
MTCO1P12	3.6116	7.24466	2.36742	0	20.4478	21.895	17.4713	5.30303	6.25	29.4501	20.8661	5.20833	0.515464	1.36986	8.7234	6.79012
AC114498.2	0.236827	0.356295	0.662879	0	1.19403	3.20102	0.689655	0.378788	1.04167	1.11836	3.93701	0	0	0	0.638298	0.205761
MTCO2P12	0.53286	0.475059	0.804924	1.16279	3.58209	1.28041	1.37931	1.51515	0.694444	1.21156	4.72441	2.08333	0	0	0.638298	1.64609
MTATP8P1	0.0592066	0.118765	0	0	0.298507	0.512164	0	0	0	0.186393	0.393701	0	0	0	0	0.205761
MTATP6P1	54.2925	59.2637	28.7879	24.4186	88.5075	81.9462	87.3563	74.6212	72.2222	71.575	96.8504	60.4167	13.6598	20.5479	62.766	67.0782
MTCO3P12	1.18413	0.712589	0.899621	0	6.56716	3.71319	3.21839	2.27273	1.73611	2.51631	6.29921	0	0	1.36986	0.212766	1.64609
WBP1LP6	0	0	0	0	0	0	0	0	0	0	0	0	0	0	0	0
OR4F16	0	0	0	0	0	0	0	0	0	0	0	0	0	0	0	0
CICP3	0	0	0	0	0	0	0	0	0	0	0	0	0	0	0	0
AL669831.1	6.86797	5.81948	5.01894	1.16279	17.0149	13.1882	11.7241	3.40909	6.94444	8.66729	20.8661	2.08333	10.8247	5.47945	7.87234	6.79012
RNU6-1199P	0	0	0	0	0	0	0	0	0	0	0	0	0	0	0	0
AL669831.2	0.118413	0	0	0	0.149254	0	0	0	0.347222	0.186393	0	0	0	0	0	0
AL669831.5	1.89461	1.78147	1.32576	0	4.77612	7.68246	5.74713	0.757576	3.125	4.19385	14.5669	1.04167	0	0	4.68085	5.14403
AL669831.7	0	0	0	0	0	0	0	0	0	0	0	0	0	0	0	0
AL669831.4	4.14446	2.019	1.6572	2.32558	3.13433	2.56082	2.06897	0.757576	3.81944	1.86393	5.90551	2.08333	1.28866	0	2.97872	1.64609
FAM87B	0.236827	0	0	0	0	0.256082	0	0	0	0.0931966	0.787402	0	0	0	0.212766	0.205761
LINC01128	7.164	2.25653	0.804924	30.2326	33.1343	9.34699	10.3448	1.89394	3.125	2.7027	22.0472	2.08333	0.257732	0	5.95745	10.6996
LINC00115	4.32208	3.20665	1.32576	2.32558	9.40299	4.22535	6.2069	1.89394	2.77778	2.7027	8.66142	7.29167	0.773196	2.73973	5.10638	3.7037
FAM41C	0.0592066	0	0.994318	0	0.149254	0.256082	0	0	0	0.55918	1.1811	0	0.515464	1.36986	0	0
TUBB8P11	0	0	0	0	0	0	0	0	0	0	0.393701	0	0	0	0	0
AL669831.6	0	0	0	0	0	0	0	0	0	0	0	0	0	0	0	0
AL645608.6	0	0	0	0	0.149254	0.128041	0	0.378788	0	0	0	0	0	0	0	0
AL645608.2	0.0592066	0	0.142045	0	0	2.04866	1.37931	0	0	0.745573	1.1811	0	0	0	0	0.205761
AL645608.4	0	0	0	0	0	0.256082	0	0	0	0.0931966	0	0	0	0	0	0
LINC02593	0	0	0.0473485	0	0	0.128041	0.229885	0	0	0.0931966	0	0	0	0	0	0
SAMD11	0.236827	0	0	0	0.298507	0.768246	0.45977	0	0	0.745573	0.787402	0	0	0	0	2.05761
NOC2L	20.7815	17.2209	3.97727	5.81395	67.3134	43.9181	39.3103	17.4242	22.2222	25.6291	66.1417	18.75	0.773196	1.36986	19.1489	33.7449
KLHL17	3.6116	5.10689	0.520833	0	3.58209	5.76184	2.06897	3.0303	1.73611	3.35508	2.3622	1.04167	0.515464	0	3.40426	6.58436
PLEKHN1	1.53937	1.30641	0.094697	0	0	0.896287	0.45977	0.757576	0	0.931966	0	0	0	0	0.425532	7.61317
PERM1	0.0592066	0.118765	0	0	0	0	0	0	0	0.0931966	0	0	0	0	0	0.411523
AL645608.7	0	0	0	0	0.149254	0	0	0	0	0	0	0	0	0	0	0
HES4	0.0592066	0	0	0	0.447761	0.128041	0.45977	3.40909	1.04167	2.32992	0.393701	0	0.257732	0	1.06383	0
ISG15	19.8342	11.8765	3.0303	1.16279	18.0597	21.1268	14.2529	7.57576	10.4167	11.0904	37.4016	5.20833	0.773196	0	16.383	12.3457
AL645608.3	0	0	0	0	0.149254	0	0	0	0	0.0931966	0	0	0	0	0	0
AL645608.1	0.17762	0.356295	0	0	0.746269	0.256082	0	0	0	0	0.393701	0	0	0	0.212766	0
AGRN	0.651273	0.23753	0.189394	0	8.50746	1.40845	1.14943	0.378788	0.347222	1.11836	3.14961	0	0	0	0.638298	0.411523
AL645608.5	0	0	0	0	0	0	0	0	0	0	0	0	0	0	0	0
AL390719.1	0	0.118765	0	0	0	0.128041	0.45977	0	0	0.186393	0.393701	0	0	0	0	0.205761
AL645608.8	0	0	0	0	0	0	0	0	0	0	0	0	0	0	0	0
RNF223	0	0	0	0	0	0	0	0	0	0.0931966	0	0	0	0	0	0
C1orf159	3.49319	3.20665	0.662879	1.16279	17.3134	13.9565	5.05747	3.40909	1.04167	5.03262	15.748	4.16667	0.257732	0	4.04255	3.29218
AL390719.3	0.0592066	0	0.094697	0	0.149254	0.256082	0.229885	0	0	0.27959	0.393701	0	0	0	0	0
LINC01342	0.0592066	0	0	0	0	0	0	0	0.347222	0	0.393701	0	0	0	0	0
MIR200B	0	0	0	0	0	0	0	0	0	0	0	0	0	0	0	0
MIR200A	0	0	0	0	0	0	0	0	0	0	0	0	0	0	0	0
MIR429	0	0	0	0	0	0	0	0	0	0	0	0	0	0	0	0
AL390719.2	0	0	0	0	0	0	0	0	0	0	0	0	0	0	0	0
TTLL10-AS1	0.0592066	0.118765	0	0	0.149254	0	0	0	0	0	0.787402	0	0	0	0	0
TTLL10	0.296033	0	0.0473485	0	1.19403	0	3.21839	0	0.347222	0.186393	6.29921	0	0	0	0	0
TNFRSF18	7.69686	1.66271	0.142045	0	0.298507	0.256082	7.35632	0	1.04167	0.372787	0.393701	1.04167	0	0	20.6383	30.4527
TNFRSF4	14.9793	2.85036	0.094697	1.16279	0.597015	0.256082	6.89655	0.378788	0	0.27959	0.393701	0	0	0	5.74468	24.8971
SDF4	33.3333	29.0974	11.3636	5.81395	69.1045	58.0026	54.7126	32.197	29.1667	42.8705	75.1969	13.5417	10.567	9.58904	44.0426	75.7202
B3GALT6	7.46004	6.65083	1.18371	0	31.9403	24.3278	21.3793	7.57576	10.0694	12.1156	48.4252	7.29167	0.515464	0	7.44681	15.4321
C1QTNF12	0.35524	0.475059	0.331439	0	0.895522	0.768246	0.229885	0	0.347222	0.372787	0.393701	0	0	0	0.425532	0.411523
AL162741.1	0.0592066	0	0.284091	0	0.597015	0	0.45977	0	0.347222	0.372787	0.787402	1.04167	0	0	0	0
UBE2J2	21.7288	22.209	15.0568	12.7907	65.9701	41.8694	34.023	21.5909	16.3194	29.9161	68.5039	9.375	10.3093	9.58904	19.3617	44.6502
LINC01786	0.0592066	0	0.142045	0	0.746269	0.384123	0.229885	0	0.347222	0.0931966	2.75591	0	0	0	0.212766	0.411523
SCNN1D	0.473653	0.23753	0.094697	0	4.32836	1.92061	1.14943	0.378788	0.347222	0.83877	5.11811	0	0	0	0.212766	0.617284
ACAP3	6.80876	3.80048	3.74053	1.16279	22.5373	34.9552	17.0115	20.8333	6.94444	19.6645	27.1654	5.20833	1.54639	2.73973	5.95745	28.8066
MIR6726	0	0	0	0	0	0	0	0	0	0	0	0	0	0	0	0
PUSL1	5.50622	3.44418	1.42045	1.16279	28.5075	18.5659	8.50575	7.57576	4.16667	8.66729	26.378	3.125	0.773196	2.73973	3.82979	24.4856
INTS11	21.9065	21.6152	9.56439	2.32558	63.4328	40.9731	46.2069	26.1364	17.3611	26.6542	61.0236	10.4167	3.60825	0	19.3617	44.4444
MIR6727	0	0	0	0	0	0	0	0	0	0	0	0	0	0	0	0
AL139287.1	0.0592066	0.118765	0.0473485	0	0.149254	0.384123	0	0	0	0.0931966	0.393701	0	0	0	0	0
CPTP	8.11131	7.36342	2.69886	1.16279	23.2836	9.47503	10.5747	5.68182	9.72222	6.52377	18.5039	4.16667	1.54639	1.36986	5.53191	32.3045
TAS1R3	0.236827	0.23753	0.236742	0	0.597015	0.256082	0.45977	0	1.73611	0.0931966	0.393701	0	0.257732	0	0.212766	24.8971
DVL1	4.14446	3.80048	1.6572	1.16279	21.9403	13.4443	10.1149	5.68182	5.20833	7.64212	27.1654	3.125	0.257732	0	4.04255	13.5802
MIR6808	0	0	0	0	0	0	0	0	0	0	0	0	0	0	0	0
MXRA8	0.296033	0.118765	0.0473485	0	0.298507	0	0	0	0	1.77074	0.787402	0	0	0	0	0.205761
AURKAIP1	43.0432	36.342	22.017	10.4651	83.1343	81.306	61.6092	57.197	39.5833	58.7139	87.0079	29.1667	20.8763	17.8082	43.8298	83.5391
NDUFB4P8	0.118413	0	0	0	0	0.128041	0.229885	0	0.347222	0.0931966	0	0	0	0	0	0.205761
CCNL2	35.1095	28.1473	22.017	18.6047	57.1642	47.5032	48.7356	28.0303	29.5139	36.4399	68.5039	25	10.0515	15.0685	29.7872	42.5926
MRPL20-AS1	8.40734	8.07601	1.08902	0	30.1493	14.3406	18.6207	4.16667	9.72222	6.80336	41.3386	11.4583	0.257732	1.36986	10	16.6667
MRPL20	45.2931	39.0736	20.4072	15.1163	82.0896	75.8003	65.7471	46.9697	37.8472	59.2731	91.3386	32.2917	6.95876	8.21918	37.6596	77.9835
RN7SL657P	0	0	0	0	0	0	0	0	0	0	0	0	0	0	0	0
AL391244.2	0.651273	0.23753	0.0473485	0	3.13433	1.15237	1.37931	0	1.38889	1.02516	6.29921	0	0	0	0.851064	0.411523
ANKRD65	0	0	0	0	0.149254	1.53649	2.98851	0.378788	0	0.55918	0.787402	0	0	0	0	0
AL391244.1	0.0592066	0	0	0	0	0.128041	0.45977	0	0	0	0	0	0	0	0	0
TMEM88B	0	0	0	0	0	0	0	0	0	0	0	0	0	0	0	0
LINC01770	0	0	0	0	0	0.128041	3.90805	0	0	0	0.393701	0	0	0	0	0
VWA1	0	0	0	0	0	0.128041	6.43678	0	0	0.83877	1.1811	0	0	0	0	0
ATAD3C	1.24334	0.712589	1.18371	0	1.64179	2.30474	2.75862	0	0.694444	1.49115	4.72441	1.04167	1.28866	0	0.425532	24.0741
ATAD3B	6.39432	5.46318	1.42045	0	35.5224	22.9193	11.954	8.33333	5.90278	7.92171	32.6772	2.08333	0	1.36986	5.95745	13.3745
AL645728.2	0	0.118765	0	0	3.8806	1.79257	2.52874	0.378788	0	0.372787	6.29921	0	0	0	0	1.23457
ATAD3A	5.15098	2.13777	0.804924	0	58.6567	30.2177	17.931	5.68182	3.125	8.01491	50.3937	2.08333	0.257732	0	3.82979	17.0782
TMEM240	0.35524	0.118765	0.426136	0	0.298507	0.128041	1.14943	0	0.347222	0.372787	1.5748	0	0	0	0.638298	0.411523
SSU72	54.5293	47.1496	33.8068	11.6279	78.5075	69.5262	71.954	49.6212	48.2639	57.4091	88.189	28.125	29.8969	36.9863	45.1064	67.0782
AL645728.1	7.93369	4.27553	3.55114	0	5.8209	8.70679	5.97701	1.51515	9.02778	3.82106	17.7165	2.08333	0.773196	0	3.82979	3.29218
AL691432.3	0	0	0	0	0	0	0	0	0	0	0	0	0	0	0	0
FNDC10	2.13144	0.475059	0.378788	0	17.0149	11.1396	11.4943	2.65152	0.347222	2.7959	29.9213	0	0	0	0.851064	0.617284
AL691432.2	3.67081	3.08789	1.60985	0	10.597	4.9936	7.58621	1.89394	3.81944	3.63467	13.7795	3.125	0.515464	1.36986	2.55319	3.90947
MIB2	16.6963	17.4584	4.16667	1.16279	28.3582	17.5416	28.7356	5.68182	7.98611	9.78565	40.5512	10.4167	2.06186	2.73973	25.5319	27.3663
MMP23B	0.828893	3.80048	0.094697	0	18.5075	0.384123	2.06897	0	0	0.372787	4.33071	0	0	0	8.29787	3.90947
CDK11B	26.9982	22.8029	15.483	4.65116	59.1045	44.0461	37.4713	21.2121	24.3056	30.1957	66.5354	17.7083	18.299	17.8082	28.0851	38.6831
FO704657.1	0.592066	0.356295	0.473485	0	2.68657	0.768246	1.37931	1.13636	0	0.83877	2.75591	0	0.257732	0	0.212766	2.05761
SLC35E2B	15.749	17.5772	12.9735	10.4651	31.791	21.6389	26.8966	7.57576	13.1944	16.4958	46.063	10.4167	13.4021	21.9178	20	27.3663
AL691432.1	2.07223	0.950119	0.568182	2.32558	2.98507	1.02433	5.05747	0	2.43056	1.77074	10.2362	1.04167	0.773196	0	3.19149	2.26337
MMP23A	0	0	0	0	0.149254	0	0	0	0	0	0	0	0	0	0	0
CDK11A	27.1166	26.0095	16.1932	15.1163	48.5075	31.114	27.1264	20.8333	27.4306	28.1454	49.6063	18.75	20.3608	15.0685	24.6809	25.5144
AL031282.2	1.65779	1.54394	1.75189	5.81395	4.77612	3.71319	3.90805	0.378788	1.73611	2.42311	16.9291	1.04167	0.515464	1.36986	3.61702	3.49794
AL031282.1	2.78271	1.30641	1.79924	2.32558	4.02985	2.56082	5.51724	0.378788	1.38889	2.51631	17.3228	3.125	2.06186	0	2.34043	2.6749
SLC35E2A	7.57845	5.81948	3.78788	1.16279	21.6418	15.2369	19.5402	7.95455	8.33333	9.31966	43.3071	3.125	4.89691	4.10959	7.87234	10.4938
NADK	10.302	9.50119	69.9337	4.65116	53.2836	52.7529	23.4483	35.9848	13.5417	47.4371	56.6929	9.375	62.1134	64.3836	14.2553	30.0412
GNB1	48.6679	42.2803	66.714	6.97674	70.597	80.0256	65.2874	63.2576	44.7917	73.1594	84.6457	35.4167	57.9897	64.3836	44.2553	48.7654
AL109917.1	0.118413	0.118765	0.0473485	0	0.149254	0	0.91954	0	0	0.0931966	1.1811	0	0.257732	0	0.212766	0.823045
CALML6	0.0592066	0	0	0	0.149254	0	0	0	0	0.0931966	0	0	0	0	0	0.411523
TMEM52	0.0592066	0.23753	0	0	1.49254	0.128041	0.45977	0	0	0	0.787402	0	0	0	0	7.20165
CFAP74	0.17762	0	0.804924	0	0.447761	1.15237	0.689655	0	0	0.931966	0.393701	0	0	0	0	0
AL391845.2	0	0	0.0473485	0	0	0	0	0	0	0	0	0	0	0	0	0
GABRD	0.0592066	0.118765	0.236742	0	0.597015	0.640205	0.689655	0	0	0	1.5748	0	0	0	0	0
AL391845.1	0.0592066	0	0	0	0	0	0	0	0	0	0	0	0	0	0	0
PRKCZ	9.05861	6.4133	4.07197	0	1.49254	3.58515	9.42529	1.13636	3.81944	2.8891	5.90551	5.20833	8.50515	5.47945	3.40426	8.64198
AL590822.2	1.00651	0	1.4678	0	0.597015	1.15237	1.37931	0	1.04167	1.21156	1.9685	0	1.80412	0	0.638298	0.411523
PRKCZ-AS1	0.17762	0	0.142045	0	0.298507	0.128041	0.45977	0.757576	0	0.0931966	1.5748	0	0	0	0.212766	0
FAAP20	31.4979	28.266	23.8163	3.48837	65.5224	67.9898	65.2874	47.3485	38.5417	50.7922	85.8268	33.3333	19.0722	13.6986	25.3191	57.8189
AL590822.1	0	0	0	0	0	0	0.229885	0	0	0	0	0	0	0	0	0
SKI	14.1504	7.00713	13.447	2.32558	33.2836	28.2971	14.4828	6.06061	13.5417	18.2665	48.0315	4.16667	24.4845	27.3973	8.08511	6.58436
MORN1	1.42096	1.42518	0.520833	0	11.0448	3.32907	4.82759	1.89394	2.77778	1.49115	12.2047	2.08333	0.773196	0	3.19149	4.11523
AL589739.1	0	0	0	0	0.447761	0	0	0	0	0	0	0	0	0	0	0
AL513477.1	0.0592066	0.23753	0.0473485	0	0.895522	0.512164	0	0	0	0	1.1811	0	0	0	0.212766	0
AL513477.2	0.236827	0.356295	0.189394	0	0.895522	0.640205	1.6092	0	2.08333	0.55918	3.14961	0	0.257732	0	0.425532	0.411523
RER1	35.7608	37.4109	23.6742	11.6279	75.6716	64.5327	50.8046	40.9091	27.7778	53.1221	78.3465	19.7917	19.8454	21.9178	38.0851	78.8066
PEX10	3.67081	2.96912	0.757576	1.16279	31.6418	9.47503	13.5632	4.16667	4.51389	6.15098	29.9213	2.08333	0.515464	0	2.55319	15.0206
PLCH2	2.84192	3.44418	0	0	0.298507	0	0.45977	0	0.347222	0.0931966	0.393701	1.04167	0	0	6.38298	0.823045
AL139246.1	0	0	0.0473485	0	0	0	0	0	0	0	0	0	0	0	0	0
AL139246.4	0	0	0	0	0	0	0	0	0	0	0	0	0	0	0	0
PANK4	9.59147	8.07601	2.08333	2.32558	21.0448	13.4443	6.89655	7.19697	7.29167	8.2945	22.8346	7.29167	2.57732	5.47945	10.2128	13.3745
HES5	0	0	0	0	7.16418	0.128041	0	0	0	0	1.9685	0	0	0	0	0
AL139246.5	7.51924	6.88836	2.69886	0	2.98507	3.96927	2.75862	3.0303	6.59722	7.54893	6.29921	4.16667	0.257732	1.36986	9.57447	4.52675
TNFRSF14-AS1	6.2759	6.17577	5.53977	0	2.83582	2.04866	0.91954	0.378788	10.4167	2.98229	5.90551	7.29167	1.28866	0	7.23404	9.67078
TNFRSF14	42.3327	35.3919	18.5133	2.32558	28.5075	23.4315	39.3103	37.8788	43.0556	40.5405	52.7559	41.6667	18.8144	16.4384	35.3191	47.5309
AL139246.2	0.118413	0	0	0	0	0	0	0	0	0	0	0	0.257732	0	0	0
AL139246.3	0.651273	0	0.0473485	0	0	0.128041	0	0	3.125	0.27959	0	2.08333	0	0	0	0.617284
PRXL2B	7.51924	3.80048	1.18371	0	38.3582	5.88988	10.5747	2.27273	5.55556	4.28705	41.7323	4.16667	0.515464	1.36986	3.61702	6.58436
MMEL1	0.414446	0.23753	1.04167	0	3.58209	1.40845	3.67816	0.378788	0	1.11836	15.3543	0	0.515464	0	0.425532	0
AL831784.1	0	0	0	0	0	0	0	0	0	0	0	0	0	0	0	0
TTC34	0.17762	0.118765	0.0473485	0	1.64179	1.66453	0.45977	0	1.04167	0.745573	3.93701	0	0	0	0	0.205761
AC242022.2	0	0.118765	0	0	0	0	0	0	0	0	0	0	0	0	0	0
AC242022.1	0	0	0	0	0	0	0	0	0	0	0	0	0	0	0	0
AL592464.2	0	0	0	0	0	0	0	0	0	0	0	0	0	0	0	0
AL592464.1	0	0	0	0	0	0	0	0	0	0	0	0	0	0	0	0
AL589702.1	0	0	0	0	0	0	0	0	0	0	0	0	0	0	0	0
ACTRT2	0	0	0	0	0	0	0	0	0	0	0	0	0	0	0	0
LINC00982	0.0592066	0	0	0	0	0	2.75862	0	0	0.0931966	0.787402	0	0	0	0	0
PRDM16	0	0.118765	0.0473485	0	0.298507	0	9.1954	0	0	0.465983	1.1811	0	0	0	0.425532	0
MIR4251	0	0	0	0	0	0	0	0	0	0	0	0	0	0	0	0
AL008733.1	0	0	0	0	0	0	0	0	0	0	0	0	0	0	0	0
AL512383.1	0	0	0.094697	0	0	0.256082	0.229885	0	0	0.27959	0	0	0.257732	0	0	0
AL590438.1	0	0	0	0	0	0	0.45977	0	0	0	0	0	0	0	0	0
ARHGEF16	0.236827	0	0	0	0.298507	0.128041	0.229885	0	0.347222	0	0	0	0	0	0	1.02881
AL512413.1	0	0	0	0	0	0	0	0	0	0	0	0	0	0	0	0
MEGF6	6.74956	1.42518	3.69318	1.16279	5.8209	6.91421	21.1494	0.757576	3.81944	4.10065	13.7795	1.04167	2.06186	5.47945	0.212766	0.617284
MIR551A	0	0	0	0	0	0	0	0	0	0	0	0	0	0	0	0
AL513320.1	0.651273	0.593824	0.0473485	0	0.149254	0	0.91954	0.378788	0.694444	0.0931966	0	0	0	0	0.425532	0.823045
TPRG1L	18.1172	15.0831	20.5966	18.6047	38.0597	19.8464	14.023	10.2273	12.5	17.055	26.7717	9.375	12.8866	16.4384	14.2553	20.3704
WRAP73	13.4991	15.7957	15.2936	2.32558	38.5075	24.0717	21.1494	15.1515	13.5417	17.7074	34.6457	9.375	7.21649	8.21918	12.1277	26.749
TP73	0	0	0	0	0.447761	0.128041	0	0	0.694444	0.0931966	1.1811	0	0	0	0.212766	6.79012
AL136528.1	0	0	0	0	0	0	0	0.378788	0	0.186393	0	0	0	0	0	0.411523
AL136528.2	0	0	0	0	0	0	0	0	0	0	0	0	0	0	0	0
TP73-AS1	4.55891	1.90024	0.426136	1.16279	36.2687	8.06658	12.8736	4.16667	5.90278	5.21901	27.1654	5.20833	0.515464	0	2.34043	8.64198
RF02197	0	0	0	0	0	0	0	0	0	0	0	0	0	0	0	0
CCDC27	0	0	0.142045	0	0.597015	0.128041	0	0	0	0.372787	1.9685	0	0.257732	0	0.212766	0
SMIM1	2.30906	1.30641	0.426136	54.6512	87.1642	2.43278	22.2989	0.757576	1.73611	2.51631	83.0709	2.08333	0.257732	0	0.638298	24.2798
LRRC47	14.624	12.2328	4.5928	3.48837	57.0149	34.8271	35.1724	12.5	11.1111	20.5965	55.9055	8.33333	1.54639	2.73973	13.1915	26.1317
RN7SL574P	0.17762	0.118765	0.0473485	0	4.02985	0.256082	1.37931	0.378788	0	0.186393	11.0236	0	0	0	0.212766	0.205761
AL365330.1	0.296033	0.118765	0	3.48837	4.02985	0.128041	0.91954	0	0	0.186393	5.51181	0	0	0	0	0
CEP104	15.5121	13.658	11.2689	2.32558	36.4179	21.3828	17.0115	10.6061	10.7639	16.8686	51.9685	7.29167	2.83505	1.36986	17.6596	26.3374
DFFB	7.63766	6.53207	0.899621	0	20.7463	10.4994	11.7241	2.27273	5.20833	6.71016	32.6772	0	0.257732	0	8.29787	4.32099
C1orf174	11.6045	13.7767	2.98295	2.32558	64.3284	30.3457	31.2644	8.33333	12.8472	16.589	70.0787	11.4583	0.773196	1.36986	20.8511	18.93
LINC01134	0.17762	0.118765	0.710227	0	2.68657	1.40845	1.6092	0.378788	0	0.83877	3.93701	0	0.773196	0	0.425532	1.02881
LINC01346	0	0	0	0	0	0	0	0	0	0	0	0	0	0	0	0
LINC01345	0	0	0	0	0	0	0	0	0	0	0	0	0	0	0	0
AL805961.1	0	0	0	0	0	0	0	0	0	0	0	0	0	0	0	0
AL805961.2	0.0592066	0.23753	0.094697	0	0	0.128041	0	0	0	0	1.1811	0	0	0	0	0
EEF1DP6	0	0	0	0	0	0	0	0	0.347222	0.0931966	0	0	0	0	0	0
LINC01777	0	0	0	0	0	0	0	0	0	0	0	0	0	0	0	0
AL355602.1	0	0	0	0	0	0	0	0	0	0	0	0	0	0	0	0
Z98747.1	0	0	0	0	0	0	0	0	0	0	0	0	0	0	0	0
LINC01646	0	0	0	0	0	0	0	0	0	0	0	0	0	0	0	0
AJAP1	0.118413	0	0.0473485	0	0	0	0.689655	0	0	0	0	0	0	0	0	0.823045
BX005132.2	0	0	0	0	0	0	0	0	0	0	0	0	0	0	0	0
BX005132.1	0	0	0	0	0	0	0	0	0	0	0	0	0	0	0	0
AL691497.1	0	0	0	0	0	0	0	0	0	0	0	0	0	0	0	0
AL139823.1	0	0	0	0	0	0	0	0	0	0	0	0	0	0	0	0
Z98259.3	0	0	0	0	0	0	0.229885	0	0	0	0	0	0	0	0	0
Z98259.2	0	0	0	0	0	0	0	0	0	0	0	0	0	0	0	0
Z98259.1	0	0	0	0	0	0	0	0	0	0	0	0	0	0	0	0
Z97988.2	0	0	0	0	0	0	0	0	0	0	0	0	0	0	0	0
AL365255.1	0.118413	0.23753	0	0	0	0	0	0	0	0	0	0	0	0	0.212766	0
Z97988.1	0	0	0	0	0	0	0	0	0	0	0	0	0	0	0	0
MIR4689	0	0	0	0	0	0	0	0	0	0	0	0	0	0	0	0
NPHP4	1.53937	1.06888	2.27273	0	10.8955	5.37772	3.67816	1.89394	1.04167	3.44828	7.87402	0	0.515464	0	1.2766	2.6749
KCNAB2	30.7874	35.3919	21.7803	3.48837	18.806	65.557	53.1034	40.9091	18.75	46.5983	47.2441	17.7083	19.8454	16.4384	38.9362	16.0494
CHD5	0	0	0	0	0.149254	0.128041	0.229885	0	0.347222	0	1.1811	0	0	0	0	0
AL031847.2	0	0.118765	0	0	0.298507	0.128041	0.229885	0	0	0	0.393701	0	0	0	0	0
RPL22	98.4606	87.5297	45.928	39.5349	96.2687	98.7196	98.6207	92.803	97.9167	92.8239	100	94.7917	7.98969	20.5479	78.2979	82.9218
AL031847.1	0.0592066	0	0	0	0	0	0	0	0	0	0	0	0	0	0.212766	2.6749
RNF207	0.651273	0.712589	0.0473485	1.16279	0.298507	0.384123	0.689655	0	2.08333	0.465983	1.5748	0	0	0	0	5.96708
ICMT	6.74956	5.58195	1.89394	2.32558	48.9552	35.3393	14.023	5.68182	3.81944	14.2591	53.1496	0	0.257732	0	8.7234	22.8395
LINC00337	0.0592066	0.118765	0.094697	0	0	0.256082	0.229885	0	0	0.0931966	0	0	0	0	0	1.02881
HES3	0	0	0	0	0	0	0	0	0	0	0	0	0	0	0	0
GPR153	0.17762	2.96912	0.0473485	0	0.298507	1.02433	0	0	0	0.372787	0.393701	0	0.257732	0	5.10638	0.411523
ACOT7	3.19716	3.08789	0.426136	0	52.5373	33.0346	16.092	2.27273	1.04167	3.82106	48.0315	1.04167	0.257732	1.36986	9.3617	3.7037
AL031848.2	1.06572	0.356295	0	0	1.79104	1.40845	1.6092	0	1.38889	0.83877	5.11811	0	0	0	0.851064	1.23457
HES2	0.17762	0.118765	0.426136	0	0.746269	0.640205	0.229885	0	0.694444	0.465983	1.5748	0	0.515464	0	0	0.617284
ESPN	0.947306	0.23753	0	3.48837	12.8358	0	0.45977	0	0	0.0931966	1.5748	0	0	0	0	0.205761
MIR4252	0	0	0	0	0	0	0	0	0	0	0	0	0	0	0	0
AL031848.1	0	0	0.094697	0	0	0	0	0	0	0	0	0	0	0	0	0
TNFRSF25	29.9586	6.88836	0.142045	1.16279	18.0597	0.640205	5.05747	0	0.347222	0.745573	36.2205	1.04167	0.257732	0	6.80851	0.617284
PLEKHG5	2.42747	0.831354	0	0	0	0	0	0	0	0.745573	0.393701	0	0	0	0.212766	1.23457
NOL9	17.0515	11.639	3.0303	2.32558	49.8507	32.7785	26.2069	9.84848	14.9306	18.4529	58.6614	15.625	0	0	11.4894	20.9877
RNU6-731P	0	0	0	0	0	0	0	0	0	0	0	0	0	0	0	0
AL591866.1	0	0	0	0	0.298507	0.256082	0	0	0	0.0931966	0.787402	0	0	0	0	0
TAS1R1	0	0	0	0	0	0	0	0	0	0	0	0	0	0	0	0.823045
ZBTB48	8.40734	9.61995	4.87689	2.32558	24.0299	21.1268	21.1494	13.2576	9.375	10.8108	33.4646	6.25	2.31959	5.47945	10.2128	11.9342
KLHL21	8.58496	4.86936	8.00189	8.13953	24.6269	15.493	10.5747	4.16667	4.16667	8.01491	36.2205	0	7.73196	8.21918	4.68085	8.84774
PHF13	3.37478	1.90024	3.0303	0	17.9104	10.8835	7.35632	1.13636	2.08333	4.47344	18.5039	2.08333	2.31959	5.47945	2.97872	6.79012
THAP3	6.15749	7.12589	1.94129	4.65116	31.3433	14.9808	15.8621	3.40909	8.68056	10.7176	35.4331	4.16667	0.257732	0	7.23404	17.4897
DNAJC11	8.34813	6.53207	1.60985	5.81395	52.6866	29.5775	21.8391	12.5	8.68056	14.4455	48.0315	4.16667	0	0	6.38298	16.6667
LINC01672	0	0	0.284091	0	0	0.128041	0	0	0	0	0	1.04167	0	0	0	0
AL591163.1	0.35524	0	0.757576	0	0.149254	0.384123	0.229885	0	0.694444	0.652377	1.1811	1.04167	1.54639	0	0.212766	0.823045
CAMTA1-DT	0.888099	0.831354	0.189394	0	3.8806	2.1767	3.67816	1.51515	0.694444	1.11836	3.54331	3.125	0	0	0.425532	0.617284
CAMTA1	25.7549	16.9834	4.21402	3.48837	71.6418	59.5391	54.7126	31.4394	22.9167	38.7698	79.1339	18.75	1.54639	2.73973	15.9574	52.8807
AL590128.1	0.0592066	0	0	0	0	0	0	0	0	0	0	0	0	0	0	0.205761
AL512330.1	0	0	0	0	0	0	0	0	0	0	0	0	0	0	0	0
RNU1-8P	0	0	0	0	0	0	0	0	0	0	0	0	0	0	0	0
CAMTA1-IT1	0	0	0	0	0	0	0	0	0	0	0	0	0	0	0	0.205761
Z97987.1	0	0	0	0	0	0	0.229885	0	0	0	0	0	0	0	0	0
AL365194.1	0	0	0	0	0	0	0	0	0	0	0	0	0	0	0	0
AL359881.3	0	0	0	0	0	0	0	0	0	0	0	0	0	0	0	0
AL359881.2	0	0	0	0	0	0.128041	0	0	0	0	0	0	0	0	0	0
AL359881.1	0	0	0	0	0	0	0	0	0	0	0	0	0	0	0	0
VAMP3	11.7821	10.095	60.7008	0	44.9254	40.2049	29.8851	32.5758	10.7639	45.8527	55.9055	4.16667	39.1753	49.3151	13.617	26.749
Z98884.2	0.0592066	0	0.568182	0	0.447761	0.640205	0	0	0.347222	0.372787	0.787402	0	0.257732	0	0	0.205761
PER3	4.02605	2.96912	0.899621	0	12.5373	6.91421	6.43678	0.757576	2.08333	3.82106	22.8346	3.125	0.257732	0	3.40426	3.08642
Z98884.1	0.888099	0.831354	0.520833	0	2.38806	1.66453	2.29885	0.757576	0	1.11836	5.11811	1.04167	0.515464	0	1.2766	0.617284
UTS2	4.38129	10.2138	0.0473485	0	2.08955	2.1767	1.83908	0.757576	0.347222	2.14352	6.69291	0	0	0	12.3404	2.05761
TNFRSF9	0.651273	3.80048	1.23106	0	0	1.02433	0.689655	0.378788	0	0.931966	0.787402	0	1.54639	0	1.91489	0.205761
AL009183.1	0	0	0.142045	0	0	0	0	0	0	0	0	0	0	0	0	0
PARK7	64.2984	59.2637	26.0417	24.4186	90.1493	86.5557	85.977	63.2576	67.3611	73.6253	96.8504	50	14.1753	13.6986	64.2553	83.7449
RF00019	0	0	0	0	0	0	0	0	0	0	0	0	0	0	0	0
AL034417.4	0.769686	0.23753	0.426136	0	1.04478	0.768246	0.229885	1.13636	1.04167	0.745573	5.90551	1.04167	0	0	0.851064	0.411523
AL034417.3	0.473653	0.475059	0.142045	0	0.597015	0	0.45977	0	0.694444	0.55918	2.3622	1.04167	0.257732	0	0.425532	0.205761
ERRFI1	0.947306	2.3753	0.331439	0	0.597015	1.15237	0.45977	1.13636	1.73611	2.42311	0.393701	0	0.515464	0	2.34043	0.411523
AL034417.2	0.118413	0.475059	0.0473485	0	0	0	0	0	0	0.186393	0	0	0.257732	0	0.638298	0
AL034417.1	0.118413	0	0	0	0.298507	0	0	0	0	0.0931966	0	0	0	0	0	0.411523
AL358876.1	0	0	0	0	0	0	0	0	0	0	0	0	0	0	0	0
LINC01714	0	0	0	0	0	0	0	0	0	0	0	0	0	0	0	0
RNU1-7P	0	0	0	0	0	0	0	0	0	0	0	0	0	0	0	0
AL358876.2	0	0	0	0	0	0.128041	0	0	0	0.0931966	0	0	0	0	0	0
RNU6-991P	0	0	0	0	0	0	0	0	0	0	0	0	0	0	0	0
SLC45A1	0.651273	0.712589	0.094697	0	0	0.128041	0.689655	0.378788	1.04167	0.186393	0.393701	0	0	0	0.425532	0
RF00019-1	0	0	0	0	0	0	0	0	0	0	0	0	0	0	0	0
RERE	30.5506	24.228	38.8731	15.1163	47.6119	50.7042	60.6897	24.2424	39.5833	41.5657	75.5906	42.7083	29.8969	36.9863	28.0851	34.3621
RERE-AS1	0.769686	0.475059	0.473485	0	0	0.640205	0	0.378788	0.347222	0.83877	0.787402	0	1.54639	0	0.425532	0.617284
RF00599	0.0592066	0	0.094697	0	0.298507	0.640205	0	0	0	0.465983	1.9685	0	0	0	0.212766	0.205761
AL096855.1	0.0592066	0	0	0	0.149254	0	0	0	0	0	0.393701	0	0	0	0	0
RPL7P11	0.0592066	0	0.0473485	1.16279	0	0	0.229885	0	0	0.27959	0.393701	0	0	0	0	0
RPL7P7	0.592066	0	0.189394	2.32558	1.64179	1.66453	1.14943	0	0	1.58434	8.26772	1.04167	0	0	0.638298	0.411523
RF00019-2	0	0	0	0	0	0.128041	0	0	0	0	0	0	0	0	0	0.205761
AL357552.1	0.0592066	0.118765	0	0	0	0	0.229885	0	0.347222	0	1.5748	0	0	0	0.212766	0.205761
AL357552.2	0.17762	0	0	0	0.597015	0.256082	0.689655	0	0.347222	0.0931966	0	0	0	0	0.212766	0.205761
RPL23AP19	0	0	0	0	0	0	0	0	0	0	0	0	0	0	0	0
ENO1	64.3576	54.3943	80.3504	11.6279	77.7612	98.8476	91.7241	86.3636	58.6806	89.0028	95.6693	40.625	70.8763	80.8219	55.1064	66.8724
MIR6728	0	0	0	0	0	0	0	0	0	0	0	0	0	0	0	0
ENO1-AS1	1.42096	0.356295	0.852273	0	0.298507	2.68886	3.21839	0	1.04167	1.02516	2.75591	1.04167	0	0	1.06383	2.46914
RNU6-304P	0	0	0	0	0	0	0	0	0	0	0	0	0	0	0	0
HMGN2P17	0	0	0.0473485	0	0	0	0	0	0	0	0	0	0	0	0	0
AL139415.1	0.35524	0	0.142045	0	0	0	0.45977	0	0	0	0.393701	0	0.257732	0	0	0
AL139415.2	0	0	0	0	0	0	0	0	0	0	0	0	0	0	0	0
CA6	0.414446	0	0.0473485	0	0	0	0.229885	0	0	0	0	0	0	0	0	0
RN7SL451P	0	0	0.0473485	0	0	0	0	0	0	0	0	0	0	0	0	0
SLC2A7	0.17762	0	0	0	0	0	0.45977	0	0	0.0931966	0	0	0	0	0	0
SLC2A5	0.236827	0.118765	3.78788	1.16279	0.895522	26.7606	30.3448	0.757576	3.125	6.05778	4.33071	12.5	0.515464	1.36986	0.425532	10.9053
RF00424	0	0	0.0473485	0	0	0	0	0	0	0	0	0	0	0	0	0.205761
GPR157	2.60509	1.78147	2.55682	0	1.34328	5.6338	4.36782	1.51515	1.38889	2.32992	6.29921	1.04167	0.773196	0	0.851064	2.88066
MIR34AHG	0.296033	0.475059	0.094697	0	0.447761	0.128041	0.229885	0.378788	1.04167	1.11836	1.5748	1.04167	0	0	0.425532	2.05761
MIR34A	0	0	0	0	0	0	0	0	0	0	0	0	0	0	0	0
LNCTAM34A	0.35524	0.118765	0	0	0.447761	0.128041	1.14943	0	0.347222	0.465983	0.393701	0	0	0	0	1.64609
H6PD	10.2427	7.71971	38.6364	5.81395	18.806	31.4981	28.2759	9.4697	8.33333	24.9767	45.2756	5.20833	20.6186	28.7671	9.3617	13.1687
SPSB1	2.13144	1.18765	0.331439	0	0.298507	1.53649	1.83908	1.13636	0.347222	1.95713	1.1811	1.04167	0	0	0.212766	7.81893
BX323043.1	0	0	0	0	0	0.128041	0	0	0	0	0	0	0	0	0	0.205761
LINC02606	0.17762	0	0	0	0.746269	0.384123	0	0.378788	0.347222	0.27959	0.787402	0	0	0	0.212766	0.205761
RNA5SP40	0	0	0	0	0	0	0	0	0	0	0	0	0	0	0	0
AL928921.1	0	0	0	0	0	0	0	0	0	0	0	0	0	0	0	0
SLC25A33	5.68384	4.63183	1.60985	1.16279	34.3284	16.9014	20.2299	4.54545	6.25	5.5918	48.0315	2.08333	0.773196	0	5.74468	14.1975
AL954705.1	0.0592066	0	0.0473485	0	0.298507	0.256082	0	0	0	0.27959	0.393701	0	0	0	0	0
TMEM201	1.71699	0.831354	0.426136	0	26.7164	9.73111	7.58621	1.51515	0.694444	2.42311	27.1654	1.04167	0	0	0.851064	2.88066
PIK3CD	29.6033	27.791	50.5208	2.32558	10.597	48.0154	26.2069	21.5909	20.1389	34.11	21.6535	21.875	49.4845	45.2055	25.9574	3.49794
PIK3CD-AS1	0.35524	0.356295	1.79924	0	0.149254	4.22535	2.06897	0.757576	1.73611	1.39795	1.1811	1.04167	1.03093	1.36986	0.212766	0
AL691449.1	0.35524	0.118765	0.236742	0	0	0.640205	0.229885	0	0	0.372787	0.393701	1.04167	0.773196	0	0.638298	0
PIK3CD-AS2	1.00651	0.593824	0	0	22.9851	0.896287	7.58621	0	2.08333	0.931966	50	1.04167	0.515464	0	0.851064	22.8395
CLSTN1	23.9195	20.3088	1.27841	0	22.3881	33.4187	36.3218	10.9848	18.0556	24.4175	56.6929	12.5	1.28866	2.73973	18.2979	32.5103
MZT1P1	0	0	0	0	0	0	0	0	0	0	0	0	0	0	0.212766	0
AL357140.3	0	0	0	0	0	0	0	0	0	0	0	0	0	0	0	0.205761
CTNNBIP1	6.39432	7.12589	7.57576	0	40.2985	40.4609	27.5862	24.2424	5.20833	23.6719	54.3307	2.08333	2.06186	5.47945	9.57447	20.1646
AL357140.1	0.118413	0	0	0	0.149254	0.128041	0.229885	0	0	0.0931966	0.787402	0	0	0	0.212766	0
AL357140.4	0.0592066	0	0.0473485	0	0	0.384123	0.229885	0	0	0.0931966	0.787402	0	0	0	0	0
LZIC	20.7223	15.4394	20.5492	4.65116	52.3881	46.991	33.5632	17.803	16.6667	36.3467	70.4724	12.5	8.24742	15.0685	19.5745	22.0165
AL357140.2	0.0592066	0.23753	0.236742	0	0.447761	0.896287	1.14943	2.65152	0	0.372787	0.393701	0	0	0	0.212766	0.411523
NMNAT1	2.84192	1.54394	11.0795	0	17.0149	11.9078	12.1839	3.0303	3.47222	12.1156	27.9528	5.20833	9.53608	17.8082	3.40426	5.96708
RN7SKP269	0.0592066	0.118765	0	0	0.298507	0.512164	0	0.378788	0	0.0931966	0.787402	0	0	0	0	0
TMEM274P	0	0	0	0	0	0	0	0	0	0.27959	0	0	0	0	0	0
MIR5697	0	0	0	0	0	0	0	0	0	0	0	0	0	0	0	0
AL603962.1	0	0	0	0	0	0	0	0	0	0	0	0	0	0	0	0
RBP7	0.414446	0.23753	18.8447	0	0.298507	3.45711	0.45977	53.0303	0.347222	53.4949	0	0	51.2887	45.2055	0.212766	0.205761
UBE4B	12.4926	13.4204	24.5265	16.2791	46.2687	33.5467	27.5862	11.3636	11.8056	23.9515	55.5118	6.25	15.9794	21.9178	7.23404	24.4856
AL590639.1	0	0	0	0	0	0	0	0	0	0	0	0	0	0	0.212766	0
PGAM1P11	0.0592066	0	0.0473485	0	0.149254	0	0.229885	0	0	0.0931966	0	0	0	0	0	0
RNU6-828P	0	0	0.094697	0	0.149254	0	0.229885	0.378788	0	0	0	0	0	0	0	0
KIF1B	8.0521	8.90736	86.0322	3.48837	20.8955	38.0282	20	9.84848	6.59722	30.2889	37.7953	3.125	74.2268	84.9315	14.0426	11.3169
AL358013.1	0	0	0.0473485	0	0	0	0	0	0	0	0	0	0	0	0	0
RNU6-37P	0	0	0	0	0	0	0	0	0	0	0	0	0	0	0	0
RN7SL731P	0	0	0	0	0	0	0	0	0	0	0	0	0	0	0	0
AL139424.3	0.118413	0.23753	2.17803	1.16279	0.597015	0.768246	0.229885	0	0	1.77074	1.5748	0	4.12371	4.10959	0.212766	0.411523
AL139424.2	0.0592066	0	2.84091	0	0.149254	0.640205	0.45977	0.378788	0.347222	0.931966	0.787402	0	5.15464	4.10959	0.638298	0.205761
PGD	14.3872	9.38242	96.4015	5.81395	78.9552	85.7875	69.6552	80.303	20.1389	77.3532	87.7953	8.33333	93.5567	94.5205	10.2128	36.8313
AL139424.1	0.0592066	0	0	0	0.447761	0.128041	0.229885	0	0	0	0.787402	0	0	0	0.212766	0
CENPS-CORT	0.17762	0.23753	0	0	2.83582	1.66453	0.689655	0	0.347222	0	3.93701	0	0	0	0.212766	0.617284
CENPS	1.24334	0.831354	0.189394	0	29.8507	16.1332	8.27586	0.757576	2.08333	0.931966	39.3701	1.04167	0	0	1.06383	8.02469
CORT	0.118413	0	0	0	0.597015	0.256082	0	0	0	0	1.5748	0	0	0	0	0.205761
DFFA	13.7951	10.9264	2.93561	3.48837	51.4925	37.0038	34.9425	12.1212	18.0556	25.3495	67.3228	9.375	1.03093	0	14.0426	20.7819
AL354956.1	0.296033	0	0.0473485	0	0.447761	0.128041	0.45977	0	0	0.0931966	0	0	0	0	0.425532	0
PEX14	7.22321	5.93824	1.5625	0	27.6119	13.5723	11.4943	5.68182	4.16667	7.54893	29.1339	3.125	0.257732	0	7.87234	10.0823
RN7SL614P	0	0	0	0	0	0.128041	0	0	0	0	0.393701	0	0	0	0.212766	0
CASZ1	2.78271	5.70071	4.64015	1.16279	4.47761	6.01793	3.21839	1.51515	3.125	3.72787	6.29921	3.125	1.28866	5.47945	7.65957	0
AL139423.1	0.414446	0.950119	0.094697	1.16279	0.298507	0.384123	0	0.378788	0.694444	0.186393	0	0	0	0	0.638298	0
HSPE1P24	0	0	0	0	0	0	0	0	0	0	0	0	0	0	0	0
C1orf127	0	0	0	0	0	0.256082	0.229885	0.757576	0	0.465983	0	0	0	0	0	0.411523
CFL1P6	0.0592066	0	0	0	0	0	0	0	0	0.0931966	0	0	0	0	0	0
TARDBP	17.5252	11.1639	21.8277	8.13953	54.6269	57.6184	40.9195	18.5606	23.9583	33.3644	80.7087	19.7917	8.76289	10.9589	19.5745	26.749
AL109811.3	0.0592066	0	0.0473485	0	0	0.128041	0.45977	0	1.04167	0.0931966	0	1.04167	0	0	0.212766	0
MASP2	0.118413	0.23753	0	0	0.298507	0.128041	0.229885	0.378788	0	0.372787	0.787402	0	0	0	0	0.411523
AL109811.2	1.53937	1.66271	0.568182	0	2.38806	2.04866	3.90805	0	1.38889	1.67754	4.72441	4.16667	0.257732	0	2.12766	1.02881
SRM	27.8863	22.0903	1.70455	2.32558	76.2687	57.6184	51.954	24.6212	26.3889	29.8229	91.3386	13.5417	2.83505	0	14.6809	79.6296
EXOSC10	17.762	18.0523	6.53409	4.65116	61.3433	42.6376	34.2529	15.5303	19.7917	24.6039	68.8976	9.375	1.03093	2.73973	17.4468	24.6914
AL109811.1	0.414446	0.23753	0.142045	0	1.9403	0.768246	1.14943	0.378788	1.04167	0.465983	4.72441	1.04167	0	0	0.212766	0.411523
EXOSC10-AS1	0.0592066	0.118765	0	1.16279	1.79104	2.1767	0.45977	0	0	0.55918	1.9685	1.04167	0	0	0.212766	2.26337
MTOR	11.0716	8.4323	7.38636	3.48837	41.3433	33.0346	21.3793	11.7424	12.1528	18.6393	49.2126	10.4167	2.06186	1.36986	12.3404	18.93
MTOR-AS1	0.0592066	0	0.0473485	0	0.149254	0	0	0	0	0	0	0	0	0	0.212766	0
RNU6-537P	0	0	0	0	0	0	0	0	0	0	0	0	0	0	0	0
ANGPTL7	0.236827	0	0.0473485	0	0.447761	0.128041	0.229885	0	1.38889	0.372787	0.787402	0	0	0	0	0
RNU6-291P	0	0	0	0	0	0	0	0	0	0	0	0	0	0	0	0
RPL39P6	0	0	0	0	0	0	0	0	0	0	0.393701	0	0	0	0	0
UBIAD1	13.2623	7.24466	1.70455	6.97674	41.194	18.3099	19.7701	6.43939	12.8472	9.97204	49.2126	15.625	0.257732	0	8.29787	20.9877
UBE2V2P3	0.0592066	0	0	0	0	0	0	0	0	0	0.393701	0	0	0	0	0.205761
AL031291.1	0	0	0	0	0	0	0	0	0	0	0	0	0	0	0	0
MTCYBP45	0	0	0	0	0	0	0	0	0	0	0	0	0	0	0	0
DISP3	0.118413	0.118765	0	0	0.447761	0	0	0	0.347222	0.186393	0	0	0	0	0.425532	0
AL590989.1	0	0	0	0	0	0	0	0	0	0	0	0	0	0	0	0
LINC01647	0	0	0	0	0	0	0	0	0	0	0	0	0	0	0	0
AL031731.1	0.35524	0.118765	0.094697	1.16279	0	0.128041	0	0.378788	0.347222	0.0931966	0	1.04167	0	0	0.425532	0
FBXO2	5.74304	3.44418	1.08902	0	0	0.128041	0.91954	0	5.20833	0.465983	0.787402	3.125	0.515464	1.36986	6.17021	15.6379
FBXO44	15.4529	15.7957	1.5625	0	4.47761	4.09731	13.7931	5.68182	11.4583	4.19385	4.33071	9.375	2.57732	2.73973	14.6809	15.4321
FBXO6	4.61812	7.48219	5.11364	0	10.597	16.5173	13.3333	10.6061	6.25	13.7931	9.44882	3.125	3.35052	6.84932	19.5745	18.93
MAD2L2	15.2753	15.7957	7.95455	0	65.3731	50.9603	36.5517	23.8636	12.8472	21.5284	62.2047	7.29167	5.41237	6.84932	20	40.3292
DRAXIN	0.17762	2.019	2.74621	0	0.746269	2.1767	2.52874	0.378788	0.347222	0.931966	3.54331	0	1.28866	1.36986	8.93617	0.617284
AGTRAP	17.3475	28.0285	64.9621	1.16279	54.9254	76.5685	28.2759	71.9697	7.63889	70.8295	53.937	8.33333	63.6598	67.1233	42.5532	10.9053
C1orf167	0.236827	0	0.189394	0	1.34328	0.512164	0.229885	0	0.347222	0.745573	1.1811	0	0.257732	0	0.212766	0.823045
AL953897.1	0.0592066	0	0	0	0	0	0	0	0	0	0	0	0	0	0	0
MTHFR	10.2427	9.50119	11.3636	9.30233	49.8507	25.8643	24.5977	12.8788	13.1944	24.6039	60.6299	18.75	5.41237	6.84932	14.2553	11.5226
CLCN6	3.96684	3.80048	3.125	3.48837	18.5075	13.5723	11.4943	10.2273	11.8056	14.0727	25.1969	13.5417	0.515464	0	4.25532	8.02469
RF02156	0	0	0	0	0	0	0	0	0	0	0	0	0	0	0	0
RF02157	0	0	0	0	0	0	0	0	0	0	0	0	0	0	0	0
NPPA	0.0592066	0.118765	0	1.16279	0.298507	0.128041	0.229885	0	0.694444	0.186393	0	0	0	0	0	0
RF02158	0	0	0	0	0	0	0	0	0	0	0	0	0	0	0	0
NPPB	0	0	0	0	0	0	0	0	0	0	0	0	0	0	0	0
AL021155.1	0	0	0	0	0	0	0	0	0	0	0	0	0	0	0	0
AL021155.2	7.34162	5.34442	9.70644	1.16279	13.7313	19.7183	15.4023	7.95455	22.2222	11.4632	25.5906	5.20833	1.54639	0	8.7234	13.786
RNU5E-1	0	0	0	0	0	0	0	0	0	0	0	0	0	0	0	0
RNU5E-4P	1.89461	1.18765	6.96023	1.16279	7.91045	22.2791	10.8046	4.54545	6.25	11.836	33.4646	3.125	0.515464	1.36986	4.68085	6.79012
KIAA2013	15.8674	20.7838	21.4489	1.16279	43.5821	42.7657	28.046	20.4545	15.9722	31.0345	55.9055	17.7083	23.7113	21.9178	21.9149	42.3868
PLOD1	1.18413	2.96912	11.7424	0	30.4478	24.5839	11.954	25	3.125	23.2992	28.7402	2.08333	12.6289	19.1781	10.6383	29.6296
MFN2	7.34162	6.05701	46.1648	19.7674	36.5672	38.1562	13.5632	11.3636	8.68056	23.3924	47.6378	7.29167	40.2062	50.6849	7.44681	14.1975
AL096840.1	0	0	0	0	0	0	0	0	0	0	0	0	0	0	0	0
MIIP	13.2031	12.2328	18.0871	6.97674	46.4179	32.2663	25.7471	27.2727	20.1389	20.6897	40.9449	15.625	12.3711	13.6986	10.8511	15.0206
RF00019-3	0	0	0.0473485	0	0	0	0	0	0	0	0	0	0	0	0	0
MIR6729	0	0	0	0	0	0	0	0	0	0	0	0	0	0	0	0
RN7SL649P	0	0	0	0	0	0	0	0	0	0	0	0	0	0	0	0
TNFRSF8	0.0592066	0.118765	0.94697	0	0.298507	0.640205	0.45977	2.65152	0	6.24418	0	0	1.54639	2.73973	0	0.411523
RNU6-777P	0	0	0	0	0	0	0	0	0	0	0	0	0	0	0	0
RPL23AP89	0	0	0	0	0	0	0	0.378788	0	0	0	0	0	0	0	0
AL357835.1	0	0	0	0	0	0	0	0	0	0	0	0	0	0	0	0
MIR7846	0.0592066	0	0.0473485	0	0	0	0	0	0	0	0	0	0	0	0.212766	0
TNFRSF1B	33.4517	47.0309	40.1515	1.16279	21.4925	50.5762	11.954	66.6667	17.7083	70.1771	8.26772	4.16667	67.7835	61.6438	45.9574	5.34979
MIR4632	0	0	0	0	0	0	0	0	0	0	0	0	0	0	0	0
RPL10P17	0	0	0	0	0	0	0	0	0	0.0931966	0	0	0	0	0	0
RF00156	0	0	0	0	0	0	0	0	0	0	0	0	0	0	0	0
VPS13D	22.1433	15.5582	24.5265	1.16279	40.2985	34.6991	24.1379	10.9848	20.1389	30.0093	48.0315	16.6667	13.1443	23.2877	17.6596	12.7572
SNORA59A	0	0	0	0	0	0	0	0	0	0	0	0	0	0	0	0
AC243836.1	0	0	0	0	0	0.128041	0	0	0	0	0	0	0	0	0	0
DHRS3	10.9532	8.90736	0.142045	1.16279	38.9552	6.01793	7.12644	0	0.347222	2.60951	59.4488	0	0.257732	0	28.5106	0.205761
RNU6ATAC18P	0	0	0	0	0	0	0	0	0	0.0931966	0.787402	0	0	0	0	0
MIR6730	0	0	0	0	0	0	0	0	0	0	0	0	0	0	0	0
AC254633.1	0	0.475059	0	0	1.19403	0	0	0	0	0.186393	3.14961	0	0	0	0.212766	0
AADACL4	0	0	0	0	0	0	0	0	0	0	0	0	0	0	0	0
AC244670.1	0	0	0	0	0	0	0	0	0	0	0	0	0	0	0	0
AADACL3	0	0	0	0	0	0	0	0	0	0	0	0	0	0	0	0
C1orf158	0	0	0.0473485	0	0	0	0	0	0	0	0	0	0	0	0	0
PRAMEF12	0	0	0	0	0	0	0	0	0	0	0	0	0	0	0	0
PRAMEF1	0	0	0	0	0	0	0	0	0	0	0	0	0	0	0	0
LINC01784	0	0	0	0	0	0	0	0	0	0	0	0	0	0	0	0
PRAMEF11	0	0	0	0	0	0	0	0	0	0	0	0	0	0	0	0
PRAMEF30P	0	0	0	0	0	0	0	0	0	0	0	0	0	0	0	0
HNRNPCL1	0	0	0	0	0.149254	0	0	0	0	0	0	0	0	0	0	0
PRAMEF2	0	0	0	0	0	0	0	0	0	0	0	0	0	0	0	0
PRAMEF4	0	0	0	0	0	0	0	0	0	0	0	0	0	0	0	0
PRAMEF10	0	0	0	0	0	0	0	0	0	0	0	0	0	0	0	0
PRAMEF7	0	0	0	0	0	0	0	0	0	0	0	0	0	0	0	0
RNU6-1072P	0	0	0	0	0	0	0	0	0	0	0	0	0	0	0	0
PRAMEF29P	0	0	0	0	0	0	0	0	0	0	0	0	0	0	0	0
PRAMEF6	0	0	0	0	0	0	0	0	0	0	0	0	0	0	0	0
PRAMEF28P	0	0	0	0	0	0	0	0	0	0	0	0	0	0	0	0
PRAMEF27	0	0	0	0	0	0	0	0	0	0	0	0	0	0	0	0
HNRNPCL3	0	0	0	0	0	0	0	0	0	0	0	0	0	0	0	0
PRAMEF25	0	0	0	0	0	0	0	0	0	0	0	0	0	0	0	0
PRAMEF34P	0	0	0	0	0	0	0	0	0	0	0	0	0	0	0	0
PRAMEF35P	0	0	0	0	0	0	0	0	0	0	0	0	0	0	0	0
HNRNPCL2	0	0	0	0	0	0	0	0	0	0	0.393701	0	0	0	0	0
PRAMEF36P	0	0	0	0	0	0	0	0	0	0	0	0	0	0	0	0
AC245056.1	0	0	0	0	0	0	0	0	0	0	0	0	0	0	0	0
PRAMEF26	0	0	0	0	0	0	0	0	0	0	0	0	0	0	0	0
HNRNPCL4	0	0	0	0	0	0	0	0	0	0	0	0	0	0	0	0
PRAMEF9	0	0	0	0	0	0	0	0	0	0	0	0	0	0	0	0
PRAMEF13	0	0	0	0	0	0	0	0	0	0	0	0	0	0	0	0
PRAMEF18	0	0	0	0	0	0	0	0	0	0	0	0	0	0	0	0
PRAMEF31P	0	0	0	0	0	0	0	0	0	0	0	0	0	0	0	0
PRAMEF5	0	0	0	0	0	0	0	0	0	0	0	0	0	0	0	0
PRAMEF32P	0	0	0	0	0	0	0	0	0	0	0	0	0	0	0	0
RNU6-771P	0	0	0	0	0	0	0	0	0	0	0	0	0	0	0	0
PRAMEF8	0	0	0	0	0	0	0	0	0	0	0	0	0	0	0	0
PRAMEF33	0	0	0	0	0	0	0	0	0	0	0	0	0	0	0	0
PRAMEF15	0	0	0	0	0	0	0	0	0	0	0	0	0	0	0	0
AC243961.1	0	0	0	0	0	0	0	0	0	0	0	0	0	0	0	0
PRAMEF14	0	0	0	0	0	0	0	0	0	0	0	0	0	0	0	0
PRAMEF19	0	0	0	0	0	0	0	0	0	0	0	0	0	0	0	0
PRAMEF17	0	0	0	0	0	0	0	0	0	0	0	0	0	0	0	0
PRAMEF20	0	0	0	0	0	0	0	0	0	0	0	0	0	0	0	0
LRRC38	0	0	0	0	0	0	0.45977	0	0	0	0	0	0	0	0	0
AL354712.1	0	0	0	0	0	0	0	0	0	0	0	0	0	0	0	0
BRWD1P1	0	0	0	0	0	0	0	0	0	0	0	0	0	0	0	0
PDPN	0	0	0.0473485	0	0	0	0	0	0	0.186393	0	0	0	0	0	0
RNA5SP41	0	0	0	0	0	0	0	0	0	0	0	0	0	0	0	0
AL359771.1	0	0	0	0	0	0	0	0	0	0	0	0	0	0	0	0
RF00564	0	0	0	0	0.149254	0	0.229885	0	0	0	0	0	0	0	0	0
PRDM2	37.537	28.9786	62.1686	8.13953	45.0746	53.137	42.2989	17.803	52.7778	46.5983	71.2598	40.625	43.299	50.6849	40.6383	36.4198
KAZN	0.118413	0.23753	7.10227	0	8.65672	1.40845	2.29885	0	0.347222	1.49115	22.8346	0	9.27835	8.21918	0.638298	0.617284
RNU6-1265P	0	0	0	0	0	0	0	0	0	0	0	0	0	0	0	0
AL357873.1	0	0	0	0	0	0	0	0	0	0	0	0	0	0	0	0
KAZN-AS1	0	0	0	0	0	0	0	0	0	0	0	0	0	0	0	0
TBCAP2	0	0	0	0	0	0	0	0.378788	0	0	0	0	0	0	0	0
TMEM51-AS1	0	0	0	0	0	0	0	0	0	0.27959	0	0	0.257732	0	0	0
TMEM51	0	0	0	0	0.149254	1.28041	1.6092	1.89394	0	2.8891	0.393701	0	0	0	0	0.617284
C1orf195	0	0	0	0	0	0	0	0	0	0	0	0	0	0	0	0
AL035405.1	0	0	0	0	0	0	0	0	0	0	0	0	0	0	0	0
AL391094.1	0	0	0	0	0	0	0	0	0	0	0	0	0	0	0	0
FHAD1	0	0.475059	0.0473485	0	0	0	0	0	0	0.372787	0	0	0	0	0.425532	0.411523
AL031283.2	0	0	0	0	0	0	0	0	0	0	0	0	0	0	0	0
AL031283.3	0	0	0	0	0	0	0	0	0	0	0	0	0	0	0	0
AL031283.1	0.296033	1.18765	0.426136	0	0.597015	0.768246	0.689655	0.378788	0	0.83877	1.1811	0	0.257732	1.36986	4.25532	0.205761
EFHD2	27.5311	58.1948	78.125	4.65116	45.2239	81.9462	35.1724	65.5303	29.5139	78.0056	56.6929	15.625	81.701	72.6027	85.1064	36.8313
CTRC	0.0592066	0	0.331439	0	0.298507	0.512164	0.229885	0	0	0.0931966	0	0	0.257732	0	0.425532	0
CELA2A	0	0	0	0	0	0	0	0	0	0	0.393701	0	0	0	0	0
CELA2B	0.0592066	0	0	0	0	0	0	0	0	0	0	0	0	0	0	0.205761
CASP9	4.73653	4.86936	4.92424	1.16279	12.5373	13.0602	10.3448	7.19697	5.55556	7.26934	20.0787	9.375	3.09278	1.36986	7.87234	6.99588
DNAJC16	8.76258	7.48219	8.66477	1.16279	25.8209	20.7426	19.3103	8.71212	12.1528	14.9115	46.063	11.4583	2.83505	1.36986	7.87234	11.5226
SCARNA21B	0	0	0	0	0	0	0	0	0	0	0.393701	0	0	0	0	0
AL121992.3	0.236827	0	0	0	0	0	0	0	0.347222	0	0	0	0	0	0	0
AGMAT	5.3878	1.54394	0.236742	0	10.2985	3.45711	2.75862	0	4.51389	0.931966	16.1417	3.125	0.257732	0	0.851064	2.46914
AL121992.1	0.236827	0.118765	0.094697	0	2.08955	0.896287	0.229885	0	1.04167	0.372787	1.9685	2.08333	0	0	0.212766	0
CHCHD2P6	0.17762	0	0.094697	0	1.34328	0.640205	0.229885	0.757576	0	0.27959	0	0	0	0	0.212766	0.205761
RNU7-179P	0	0	0	0	0	0	0	0	0	0	0	0	0	0	0	0
CD24P1	0	0	0	0	0	0	0	0	0	0	0	0	0	0	0	0
DDI2	11.2493	6.17577	6.48674	62.7907	64.7761	33.0346	19.5402	12.8788	12.5	23.0196	66.1417	5.20833	0.515464	5.47945	11.4894	10.4938
RSC1A1	0	0	0	0	0	0	0	0	0	0	0	0	0	0	0	0
AL121992.2	0.0592066	0	0.0473485	0	0	0	0	0	0	0.745573	0	0	0	0	0	0
PLEKHM2	15.3345	12.5891	9.70644	1.16279	47.4627	35.2113	27.3563	26.5152	19.4444	30.8481	55.5118	15.625	7.47423	5.47945	11.9149	17.4897
AL450998.3	0.0592066	0	0	0	0.746269	0.256082	0.229885	0	0	0.0931966	0.787402	0	0.257732	0	0	0
SLC25A34	0.0592066	0.118765	0	0	0.447761	0.896287	0	0	0.347222	0.27959	0.393701	0	0.515464	0	0	0.205761
SLC25A34-AS1	0	0	0	0	0	0	0	0	0	0	0	0	0	0	0	0
TMEM82	0	0	0	0	0.149254	0	0	0	0	0	0	0	0	0	0	0
FBLIM1	1.59858	0.475059	2.27273	2.32558	2.38806	1.66453	2.52874	0.378788	2.77778	3.63467	7.87402	1.04167	4.12371	1.36986	1.2766	0.617284
RPL12P14	0	0	0	0	0	0	0	0	0	0.0931966	0	0	0	0	0	0
UQCRHL	2.13144	1.78147	0.757576	0	22.9851	7.42638	11.7241	1.89394	3.125	4.65983	10.2362	2.08333	0.773196	1.36986	0.425532	10.6996
AL450998.1	2.19065	0.712589	0.0473485	0	5.8209	2.43278	1.14943	1.89394	1.04167	0.745573	1.1811	1.04167	0	0	0.638298	1.23457
AL450998.2	12.8478	8.31354	9.70644	1.16279	31.4925	22.2791	36.5517	14.0152	14.9306	19.4781	61.0236	11.4583	6.70103	5.47945	17.234	15.2263
SPEN	32.2084	26.247	47.4905	8.13953	67.4627	63.6364	48.7356	28.0303	41.3194	52.1901	84.252	34.375	39.433	45.2055	34.4681	40.535
AL034555.1	0	0	0	0	0	0	0	0	0	0.0931966	0	0	0	0	0	0
ZBTB17	7.1048	8.55107	5.49242	2.32558	23.8806	17.0294	16.092	8.33333	9.02778	10.904	33.0709	6.25	4.89691	1.36986	6.80851	10.4938
AL355994.4	1.06572	0.356295	0.142045	0	1.19403	0	0.45977	0.378788	1.73611	0.55918	6.29921	1.04167	0.257732	0	0.425532	0.205761
AL355994.1	0	0	0	0	0	0	0	0	0	0	0	0	0	0	0	0
AL355994.5	0	0	0	0	0	0	0	0	0	0	0	0	0	0	0	0
TBC1D3P6	0	0	0	0	0	0	0	0	0	0	0	0	0	0	0	0
SRARP	0.0592066	0	0	0	0	0.128041	0	0	0	0.186393	0	0	0	0	0	0
AL355994.3	0	0	0	0	0	0	0	0	0	0	0	0	0	0	0	0
HSPB7	0	0	0	0	0	0.128041	0	0	0	0	0	0	0	0	0	0
CLCNKA	0	0	0	0	0	0	0	0	0.347222	0	0.393701	0	0	0	0	0
AL355994.2	0	0	0	0	0	0	0	0	0	0	0	0	0	0	0	0
CLCNKB	0	0	0.0473485	0	1.34328	0	0	0	0	0	0.787402	0	0	0	0	0
FAM131C	0	0.118765	0	0	0.746269	0	0	0	0	0	0.787402	0	0	0	0	0
EPHA2	0	0.118765	0.0473485	0	0.149254	0.128041	0.45977	0	0.347222	0.931966	0	0	0	0	0	0
AL451042.2	0.17762	0	0	0	0	0	0.229885	0	0	0	0	0	0	0	0	0
AL451042.1	0	0	0	0	0	0	0	0	0	0	0	0	0	0	0	0
ARHGEF19-AS1	0	0	0	0	0	0	0	0	0	0	0	0	0	0	0	0
ARHGEF19	4.67732	4.75059	0.378788	1.16279	11.4925	7.68246	14.7126	1.89394	2.08333	3.44828	16.5354	2.08333	1.28866	1.36986	4.68085	6.3786
ANO7L1	0.296033	0.23753	0.094697	2.32558	2.38806	0.128041	0.91954	0.757576	0	0.27959	0	0	0	0	0	2.88066
CPLANE2	0.769686	1.06888	0.0473485	0	7.91045	1.79257	2.75862	1.13636	1.38889	0.465983	7.48031	0	0	0	0.212766	2.26337
MT1XP1	0.414446	0.356295	0.852273	1.16279	1.19403	1.79257	0.689655	0	0.347222	1.86393	3.93701	1.04167	0.773196	2.73973	1.06383	0
FBXO42	14.2688	11.0451	13.0208	3.48837	38.806	29.4494	27.1264	16.2879	17.3611	26.4678	48.8189	12.5	9.53608	8.21918	15.1064	20.1646
SZRD1	25.1628	20.9026	22.1591	8.13953	60	54.1613	41.3793	26.8939	28.4722	33.178	70.0787	15.625	13.1443	20.5479	22.766	26.1317
RPL22P3	0.651273	0.118765	0.0473485	0	2.23881	0.768246	0.45977	0.757576	0	0.27959	0.393701	1.04167	0	0	0.212766	0.205761
SPATA21	1.00651	0.593824	0.189394	0	2.38806	1.02433	0.91954	0.378788	2.08333	0.745573	2.3622	1.04167	0.773196	1.36986	0.212766	0.205761
NECAP2	32.8005	23.8717	14.2519	24.4186	65.9701	33.6748	30.5747	27.6515	25	36.6263	64.9606	17.7083	7.47423	10.9589	20.6383	23.0453
LINC01772	1.95382	1.66271	1.94129	2.32558	3.58209	2.68886	2.06897	0	1.73611	3.26188	4.72441	2.08333	1.80412	1.36986	2.12766	1.23457
CROCCP3	2.60509	2.019	0.426136	0	3.43284	1.79257	5.05747	0.757576	3.125	2.14352	7.87402	2.08333	0.515464	0	4.25532	1.85185
RNU1-1	0	0	0	0	0	0	0	0	0	0	0	0	0	0	0	0
AL137802.2	1.48017	1.54394	0.236742	0	3.43284	1.15237	3.44828	0.378788	1.73611	0.27959	1.1811	1.04167	0	0	1.06383	1.44033
AL137802.3	0	0.118765	0	0	0	0	0	0	0	0	0	0	0	0	0	0
AL137802.1	0	0	0	0	0	0	0	0	0	0	0	0	0	0	0	0
LINC01783	0	0	0	0	0.597015	0	0.45977	0	0.694444	0	0.787402	0	0	0	0	0
RNU1-6P	0	0	0	0	0	0	0	0	0	0	0	0	0	0	0	0
AL355149.1	0	0	0	0	0	0	0	0	0	0	0	0	0	0	0	0
NBPF1	11.2493	6.17577	2.03598	0	20	13.4443	34.2529	6.06061	14.9306	12.8611	38.189	12.5	0.773196	0	6.59574	11.9342
AL137798.1	0	0	0	0	0	0	0.229885	0	0	0	0	0	0	0	0	0
CROCCP2	24.3339	21.1401	9.18561	27.907	60	31.6261	35.1724	20.4545	20.8333	25.2563	64.1732	18.75	2.57732	6.84932	23.4043	22.428
AL137798.3	0	0	0	0	0	0	0	0	0	0	0	0	0	0	0	0
MST1P2	1.12493	0.475059	0	0	0.895522	0.256082	1.37931	0	0.347222	0.27959	0.393701	0	0	0	0.851064	1.02881
AL137798.2	0	0	0	0	0	0	0	0	0	0	0	0	0	0	0	0
RNU1-3	0	0	0	0	0	0	0.229885	0	0	0	0	0	0	0	0	0
AL021920.2	0	0	0	0	0	0	0	0	0	0	0	0	0	0	0	0
EIF1AXP1	0.296033	0	0.0473485	0	2.08955	0.256082	1.14943	0.378788	0.347222	0.186393	2.3622	0	0	0	0.638298	1.44033
ESPNP	0.296033	0.23753	0	0	0	0	0	0	0	0	0	0	0	0	0	0
AL021920.1	0	0	0	0	0	0	0	0	0	0	0	0	0	0	0	0
AL021920.3	0.0592066	0.118765	0	0	0.746269	0	0.45977	0	0	0	0	0	0	0	0.212766	0
CROCC	7.9929	6.7696	0.520833	1.16279	10	7.29834	20.4598	3.78788	5.20833	5.685	16.5354	7.29167	0.773196	0	6.59574	5.55556
CROCCP4	0.17762	0.23753	0	0	0.149254	0	0.45977	0	0	0	0	0	0	0	0	0
RNU1-4	0	0	0	0	0	0	0	0	0	0	0	0	0	0	0	0
MST1L	0.769686	0.593824	0.0473485	0	0.746269	0.512164	0.45977	0	0	0.465983	0.393701	0	0	0	1.06383	0.617284
BX284668.1	0	0	0	0	0	0	0	0	0	0	0	0	0	0	0	0
BX284668.3	0	0	0	0	0	0	0	0	0	0	0	0	0	0	0	0
MIR3675	0	0	0	0	0	0	0	0	0	0	0	0	0	0	0	0
BX284668.2	0.0592066	0	0	0	1.19403	0	1.83908	0	0.347222	0.186393	0.393701	0	0	0	0.425532	0
RNU1-5P	0	0	0	0	0	0	0	0	0	0	0	0	0	0	0	0
BX284668.5	11.9005	9.50119	0.426136	0	6.26866	29.3214	14.9425	33.7121	14.9306	28.425	11.811	14.5833	0.515464	0	14.0426	5.76132
BX284668.4	0.0592066	0	0	0	0	0	0.229885	0	0	0.0931966	0	0	0	0	0	0
RNU1-2	0	0	0	0	0	0	0	0	0	0	0	0	0	0	0	0
BX284668.6	9.41385	6.05701	3.97727	1.16279	5.67164	3.58515	5.51724	1.13636	4.86111	2.42311	10.6299	5.20833	1.80412	4.10959	14.0426	3.49794
MFAP2	0.118413	0.118765	0	0	0.447761	0	17.4713	0	0.347222	0.465983	1.1811	0	0	0	0.212766	1.23457
AL049569.1	0	0.118765	0	0	0	0	0	0	0	0	0	0	0	0	0	0
ATP13A2	9.76909	7.48219	2.17803	1.16279	24.6269	16.2612	16.092	12.8788	3.47222	15.1911	38.5827	4.16667	0.515464	0	6.80851	6.79012
SDHB	21.9657	19.5962	14.3466	18.6047	68.0597	56.338	44.1379	35.9848	23.6111	49.2078	75.1969	13.5417	15.9794	12.3288	18.9362	42.5926
PADI2	0.17762	0	43.75	1.16279	0.746269	9.09091	0.229885	0.757576	1.04167	6.52377	0	0	44.8454	49.3151	0	1.23457
AL590644.1	0	0	0	0	0	0	0	0	0	0	0	0	0	0	0	0
AL590644.3	0	0	0	0	0	0	0	0	0	0	0	0	0	0	0	0
PADI1	0	0	0	0	0	0	0	0	0	0	0	0	0	0	0	0
PADI3	0	0	0.662879	0	0	0	0	0	0	0	0	0	0	0	0	0
MIR3972	0	0	0	0	0	0	0	0	0	0	0	0	0	0	0	0
PADI4	5.03256	2.3753	98.4375	5.81395	8.0597	36.8758	26.2069	13.2576	4.51389	31.3141	20.8661	8.33333	92.7835	97.2603	4.25532	6.17284
PADI6	0	0.118765	0	0	0	1.15237	0	0.378788	0	0.372787	0	0	0	0	0	0
RCC2-AS1	0.0592066	0	0	0	0.298507	0.384123	0	0	0	0	0.787402	0	0	0	0.212766	0
RCC2	15.2161	12.4703	4.30871	1.16279	70.4478	65.1729	53.5632	22.7273	22.9167	38.4902	85.4331	20.8333	0.515464	0	23.4043	17.0782
ARHGEF10L	0.0592066	0	0.142045	0	0.149254	6.91421	0	10.9848	1.38889	10.438	0.787402	0	0	1.36986	0	0
AL136529.1	0	0	0	0	0	0	0	0	0	0	0	0	0	0	0	0
ACTL8	0	0	0	0	0.149254	0	0	0	0	0	0.393701	0	0	0	0	0
AL357509.1	0	0	0.0473485	0	0	0.128041	0	0	0	0.0931966	0	0	0	0	0	0
LINC01654	0	0	0	0	0	0	0	0	0	0	0	0	0	0	0	0
IGSF21	0.0592066	0	0	0	0	0	0	0	0	0.652377	0	0	0	0	0.212766	0
AL365209.1	0	0	0	0	0	0	0	0	0	0.186393	0	0	0	0	0	0
IGSF21-AS1	0	0	0	0	0	0	0	0	0	0	0	0	0	0	0	0
AL591896.1	0	0	0	0	0	0	0	0	0	0	0	0	0	0	0	0
KLHDC7A	0	0	0	0	0	0	0	0	0	0	0	0	0	0	0	0
DYNLL1P3	0	0	0	0	0	0	0	0	0	0	0	0	0	0	0	0
AL031737.1	0	0	0	0	0	0	0	0	0	0	0	0	0	0	0	0
PAX7	0	0	0	0	0	0	0	0	0	0	0	0	0	0	0	0
TAS1R2	0	0	0	0	0	0	0	0	0	0	0	0	0	0	0	0
AL080251.1	0	0	0	0	0	0	0	0	0	0	0	0	0	0	0	0
ALDH4A1	0.592066	0.118765	1.4678	1.16279	27.7612	24.968	5.51724	4.92424	0.694444	6.80336	18.8976	1.04167	0.257732	0	0.851064	3.29218
MIR4695	0	0	0	0	0	0	0	0	0	0	0	0	0	0	0	0
MIR1290	0	0	0	0	0	0	0	0	0	0	0	0	0	0	0	0
IFFO2	10.1835	7.36342	0.473485	0	5.97015	8.96287	9.88506	2.65152	2.77778	6.80336	16.9291	1.04167	0	0	11.2766	6.3786
AL137127.1	0.118413	0.118765	0.94697	1.16279	1.04478	1.28041	0.45977	0	0	1.21156	4.33071	0	0.515464	0	0.212766	0.205761
UBR4	24.0379	20.7838	32.197	45.3488	66.5672	49.936	38.3908	34.8485	22.2222	41.6589	75.9843	14.5833	20.8763	31.5068	20	24.0741
EMC1-AS1	1.06572	0.950119	0.331439	0	3.28358	3.84123	3.67816	0.757576	1.73611	2.05033	5.51181	0	0	0	1.70213	4.73251
EMC1	9.41385	6.88836	3.36174	1.16279	43.1343	31.37	22.9885	6.81818	9.375	17.3346	50	6.25	2.06186	0	10.4255	21.6049
MRTO4	14.328	7.95724	0.94697	1.16279	73.8806	42.3816	35.4023	9.4697	17.7083	17.8938	79.5276	10.4167	0.773196	0	7.65957	24.2798
AL035413.2	0	0	0	0	0	0	0	0	0	0	0	0	0	0	0	0
AKR7L	0.236827	0.593824	0.094697	0	0.597015	0.896287	0	0	0	0.186393	1.5748	0	0.257732	0	0	0.205761
AKR7A3	0.236827	0.118765	0	0	0.895522	0.384123	0.229885	0	0	0	1.1811	1.04167	0	0	0.425532	0.823045
AL035413.1	0.0592066	0	0	0	0	0.256082	0	0	0	0.0931966	0.393701	0	0	0	0	0.205761
AKR7A2	19.4198	14.3705	1.84659	1.16279	68.5075	51.2164	52.8736	21.9697	20.1389	25.3495	72.0472	13.5417	0.515464	1.36986	19.5745	33.9506
RNU6-1099P	0.0592066	0.356295	0	0	0.149254	0	0.229885	0	0	0.0931966	0.787402	0	0	0	0.212766	0
PQLC2	2.13144	2.13777	2.98295	0	11.9403	20.4866	12.8736	4.16667	5.20833	9.78565	12.9921	2.08333	0.773196	0	2.55319	9.87654
CAPZB	74.5411	69.0024	88.3523	5.81395	83.2836	89.2446	84.3678	85.9848	61.1111	82.7586	90.5512	44.7917	83.2474	89.0411	69.5745	55.5556
RN7SL277P	0	0.118765	0.094697	0	0.149254	0	0	0	0	0.0931966	0	0	0.515464	0	0	0
MICOS10	45.5891	35.9857	25.3788	6.97674	85.3731	85.0192	56.7816	70.8333	41.6667	70.1771	92.126	28.125	13.9175	15.0685	39.7872	67.0782
RNU4-28P	0	0	0	0	0	0	0	0	0	0	0	0	0	0	0	0
AL031727.2	0.414446	0	0	0	0	0	0.229885	0	0	0	0	0	0	0	0.212766	0.205761
NBL1	9.23623	2.61283	0.284091	0	62.0896	3.58515	33.3333	0	0.694444	2.23672	55.5118	0	0	0	2.12766	1.02881
MICOS10-NBL1	0	0	0	0	0	0	0	0	0	0	0	0	0	0	0	0
AL031727.1	4.85494	1.06888	0.568182	0	19.2537	11.1396	8.73563	2.65152	5.20833	4.47344	24.4094	2.08333	0	0	0.851064	4.93827
HTR6	0.236827	0	0	0	0	0	0	0	0	0	0	0	0	0	0	0
TMCO4	7.69686	4.75059	3.74053	0	12.6866	11.3956	10.3448	5.30303	8.68056	8.66729	23.2283	5.20833	2.31959	2.73973	5.95745	13.3745
RNF186	0	0	0	0	0	0	0	0	0	0	0	0	0	0	0	0.205761
AL391883.1	0	0	0	0	0	0	0	0	0	0	0	0	0	0	0	0
OTUD3	4.97336	4.27553	0.757576	2.32558	19.2537	10.8835	7.35632	3.78788	4.51389	4.84623	20.8661	4.16667	0	0	3.61702	9.67078
PLA2G2E	0	0	0	0	0	0	0	0	0	0	0	0	0	0	0	0
RN7SL304P	0	0	0	0	0	0	0	0	0	0	0	0	0	0	0	0
PLA2G2A	0	0	0	0	0	0	0	0	0	0	0	0	0	0	0	0
PLA2G5	0	0	0	0	0	0	0	0	0	0	0	0	0	0	0	0
PLA2G2D	0.0592066	0.118765	0	0	0	0	0	0	0.347222	0	0	0	0	0	0	3.7037
PLA2G2F	0	0	0	0	0	0	0	0	0	0	0	0	0	0	0	0
Z98257.1	0	0	0	0	0	0.128041	0	0	0	0.186393	0.393701	0	0	0	0	0
PLA2G2C	0.118413	0	0	0	0.149254	0.640205	0	0.378788	0	0.55918	0	0	0	0	0	0
UBXN10-AS1	0.947306	0.831354	0	0	10.1493	0	0	0	0.347222	0.372787	2.75591	0	0	0	0	0
UBXN10	0.118413	0.712589	0.094697	1.16279	19.7015	0	0	0	0	0.0931966	3.14961	0	0	0	0.212766	0.205761
LINC01757	0	0	0	0	0	0	0	0	0	0	0	0	0	0	0	0
Z98257.2	0	0	0	0	0	0	0	0	0	0	0	0	0	0	0	0
VWA5B1	0	0	0	0	0	0	0	0	0	0	0	0	0	0	0.212766	0
AL020998.1	0.17762	0.356295	0	0	0	0	0	0	0	0	0	0	0	0	0	0
LINC01141	0	0	0	0	0	0	0	0	0	0	0	0	0	0	0	0
AL139254.1	0	0	0	0	0	0	0	0	0	0	0	0	0	0	0	0
AL139254.2	0	0	0	0	0	0	0	0	0	0	0	0	0	0	0	0
AL139254.3	0	0	0	0	0	0	0	0	0	0	0	0	0	0	0	0
CAMK2N1	11.0716	13.0641	0.094697	0	0.298507	0.256082	0.229885	0	1.38889	0.55918	1.1811	2.08333	0.257732	0	4.04255	0.617284
MUL1	7.69686	8.07601	4.73485	1.16279	26.2687	14.9808	15.4023	9.09091	6.25	12.0224	31.4961	5.20833	2.83505	1.36986	6.80851	22.2222
RPS4XP4	0	0	0	0	0	0	0.229885	0	0	0	0	0	0	0	0	0
FAM43B	0	0	0	0	0.746269	0	0	0	0	0	0.393701	0	0	0	0	0
CDA	2.19065	1.90024	85.7481	2.32558	3.28358	37.2599	3.44828	35.2273	2.08333	49.301	3.93701	1.04167	88.4021	89.0411	1.48936	4.32099
PINK1	10.302	9.02613	22.9167	36.0465	20.4478	15.621	24.5977	13.2576	3.81944	21.808	20.4724	6.25	31.4433	31.5068	12.1277	34.7737
MIR6084	0	0	0	0	0	0	0	0	0	0	0	0	0	0	0	0
PINK1-AS	0.828893	0.950119	0.662879	0	2.38806	4.22535	2.98851	1.51515	1.04167	1.30475	4.72441	0	1.80412	0	0.212766	2.46914
DDOST	39.8461	40.2613	8.99621	5.81395	77.9104	68.3739	70.3448	35.6061	33.3333	41.3793	88.5827	20.8333	2.06186	4.10959	36.8085	84.5679
KIF17	0	0	0	0	0.149254	5.37772	4.36782	0	0	0.372787	0.393701	0	0	0	0	0
AL663074.2	0	0	0	0	0	0	0	0	0	0	0	0	0	0	0	0
SH2D5	0	0	0	0	0	0.128041	0	0	0	0	0.393701	0	0	0	0	0
AL663074.1	0	0	0	0	0	0.128041	0	0	0	0	0	0	0	0	0	0
HP1BP3	67.5548	57.9572	52.6989	27.907	90.597	86.5557	79.7701	54.1667	56.5972	72.041	94.8819	43.75	16.2371	24.6575	65.3191	68.5185
EIF4G3	16.4594	18.4086	63.0682	4.65116	54.4776	49.936	56.7816	21.2121	30.5556	45.9459	88.9764	22.9167	46.134	54.7945	30.2128	32.3045
RNU7-200P	0	0	0	0	0	0	0	0	0	0	0	0	0	0	0	0
MIR1256	0	0	0	0	0	0	0	0	0	0	0	0	0	0	0	0
RPS15AP6	0.0592066	0.23753	1.89394	0	0.895522	2.1767	2.06897	0.378788	0.347222	2.23672	3.54331	0	1.80412	6.84932	0.212766	0.823045
AL627311.1	0	0	0	0	0.149254	0	0	0	0	0	0	0	0.257732	0	0	0
HSPE1P27	0.0592066	0	0.331439	0	0.149254	0	0.229885	0	0	0.186393	0.393701	0	0.257732	0	0.425532	0.411523
ECE1	14.8609	3.80048	46.2595	1.16279	36.8657	7.29834	4.36782	13.2576	13.1944	21.7148	42.9134	7.29167	51.2887	53.4247	4.25532	34.9794
AL031005.1	0	0	0	0	0.149254	0	0	0	0	0	1.1811	0	0	0	0	0
AL031728.1	1.12493	0.118765	0.284091	0	0.298507	0.256082	0	0	3.47222	0	1.5748	0	0.257732	0	0.212766	2.05761
PPP1R11P1	0	0	0	0	0.149254	0	0	0	0	0	0	0	0	0	0	0
AL592309.1	0	0	0	0	0	0	0	0	0	0	0	0	0	0	0	0
AL592309.2	0	0	0	0	0	0	0	0	0	0	0	0	0	0	0	0
NBPF2P	0.118413	0	0.142045	0	0.298507	0.128041	0	0.378788	0.347222	0.55918	0.787402	1.04167	0	0	0	0
HS6ST1P1	0	0	0	0	0.149254	0	0	0	0	0	0	0	0	0	0	0
CROCCP5	0	0	0	0	0	0	0	0	0	0	0	0	0	0	0	0
NBPF3	3.5524	5.22565	0.142045	0	6.86567	1.66453	7.81609	1.13636	1.73611	2.05033	6.69291	5.20833	0.515464	0	4.25532	1.44033
PFN1P10	0	0	0	0	0	0	0	0	0	0	0	0	0	0	0	0
ALPL	0.17762	0.118765	17.1402	0	4.62687	0.896287	0.229885	0.378788	1.38889	2.60951	0.787402	0	87.8866	72.6027	0	0.205761
LINC02596	0	0	0.189394	0	0	0	0	0	0	0	0	0	0.773196	0	0	0
RAP1GAP	0	0	0	3.48837	2.98507	0.256082	0	0	0.347222	0	1.5748	0	0.515464	0	0	0.205761
USP48	25.4589	23.9905	38.6364	5.81395	78.0597	69.0141	53.1034	21.9697	31.9444	49.4874	89.3701	16.6667	34.5361	49.3151	28.9362	65.8436
AL590103.1	0	0	0	0	0	0	0	0	0	0	0	0	0	0	0.212766	0
LDLRAD2	0.0592066	0.118765	0	1.16279	0.895522	1.79257	8.27586	0	0.694444	1.67754	4.33071	0	0	0	1.48936	4.93827
HSPG2	0.71048	0	0.236742	2.32558	15.9701	3.20102	18.1609	0.378788	1.04167	4.19385	33.8583	0	0.515464	1.36986	0	4.11523
AL590556.1	0	0	0	0	0.298507	0	0	0	0.347222	0	0.787402	0	0	0	0	0
AL590556.2	0.118413	0.118765	0	0	0	0	0	0	0	0	0	0	0	0	0	0
CELA3B	0	0	0	0	0	0	0	0	0	0	0	0	0	0	0	0
AL590556.3	0	0	0	0	0	0	0	0	0	0	0	0	0	0	0	0
RN7SL386P	0	0	0	0	0	0	0	0	0	0	0	0	0	0	0	0
RNU6-1022P	0	0	0	0	0	0	0	0	0	0	0	0	0	0	0	0
CELA3A	0	0	0	0	0	0	0	0	0	0	0	0	0	0	0	0
RN7SL186P	0	0	0	0	0	0	0	0	0	0	0	0	0	0	0	0
RNU6-776P	0	0	0	0	0	0	0	0	0	0	0	0	0	0	0	0
LINC01635	0.17762	0.23753	0	0	0.298507	1.66453	1.6092	0	0.347222	0.55918	0.393701	1.04167	0	0	0.425532	0.205761
LINC00339	9.41385	9.85748	4.45076	0	26.5672	20.8707	28.2759	6.81818	7.98611	12.302	38.5827	12.5	0.257732	1.36986	15.3191	16.4609
CDC42	78.4488	73.9905	96.1174	60.4651	87.1642	91.6773	85.5172	77.6515	79.1667	90.1212	96.4567	73.9583	96.134	98.6301	80.6383	63.1687
AL031281.2	1.36175	0.118765	0.378788	0	1.19403	1.92061	1.6092	0	0.694444	0.83877	3.54331	2.08333	0.515464	2.73973	1.91489	0.205761
AL031281.3	0	0	0	0	0	0	0	0	0	0	0	0	0	0	0	0
CDC42-IT1	2.6643	1.42518	20.9754	1.16279	3.13433	16.7734	4.36782	1.13636	2.77778	10.438	15.748	1.04167	17.7835	15.0685	2.55319	2.05761
AL031281.1	0.0592066	0	0.0473485	0	0	0.128041	0.229885	0	0.347222	0.186393	0.393701	0	0	0	0.212766	0.205761
WNT4	0	0	0	0	0	0	0	0	0	0.0931966	0	0	0	0	0	5.76132
AL445253.1	0	0	0	0	0	0	0	0	0	0	0	0	0	0	0	0.617284
MIR4418	0	0	0	0	0	0	0	0	0	0	0	0	0	0	0	0
PPIAP34	0	0	0	0	0.298507	0	0	0	0	0	0	0	0	0	0	0
AL591122.1	0	0	0	0	0	0	0	0	0	0	0	0	0	0	0	0
ZBTB40	15.4529	12.9454	4.73485	5.81395	28.0597	18.694	17.931	2.65152	15.2778	13.8863	41.7323	4.16667	0.257732	0	10.4255	18.93
ZBTB40-IT1	0	0.118765	0	0	0	0.128041	0	0	0	0.186393	0.393701	0	0	0	0	0
EPHA8	0	0	0	0	0	0	0	0	0	0	0	0	0	0	0	0
MIR6127	0	0	0	0	0	0	0	0	0	0	0	0	0	0	0	0
C1QA	1.12493	0.475059	2.74621	0	0.895522	3.71319	0	38.6364	1.38889	23.4856	1.1811	0	2.06186	2.73973	0.212766	2.88066
C1QC	0.296033	0.356295	0.757576	0	0.298507	0.896287	0	25.3788	0.347222	16.123	1.1811	0	0.773196	0	0	1.85185
C1QB	0.592066	0.593824	2.50947	0	1.49254	5.50576	0	29.5455	0.694444	17.8006	0.393701	0	2.57732	0	0.638298	2.6749
EPHB2	0	0	0.094697	0	0	1.53649	0	4.16667	0	7.45573	0.787402	0	0	0	0.212766	0.411523
MIR4684	0	0	0	0	0	0	0	0	0	0	0	0	0	0	0	0
AL512444.1	0	0	0	0	0	0	0	0	0	0	0	0	0	0	0	0
MIR4253	0	0	0	0	0	0	0	0	0	0	0	0	0	0	0	0
LACTBL1	0	0	0	0	0	0	0	0	0	0	0	0	0	0	0	0
TEX46	0	0.118765	0	0	0.149254	0	0.229885	0	0	0	0.393701	0	0	0	0	0
KDM1A	17.1699	15.0831	2.74621	1.16279	72.5373	53.5211	49.8851	16.2879	19.0972	27.5862	87.7953	12.5	0.773196	1.36986	17.0213	22.2222
AL031428.1	0	0.118765	0	0	0	0.128041	0	0	0.347222	0	0.787402	0	0	0	0	0
MIR3115	0	0	0	0	0	0	0	0	0	0	0	0	0	0	0	0
AL031428.2	0	0	0	0	0	0	0	0	0	0	0.393701	0	0	0	0	0
LUZP1	14.5056	12.8266	1.89394	1.16279	31.0448	31.8822	32.1839	7.95455	9.02778	20.6897	62.2047	3.125	0.773196	0	18.2979	6.58436
AL161672.1	0	0	0	0	0	0	0	0	0	0	0	0	0	0	0	0
RNU6-514P	0	0	0	0	0.149254	0	0	0	0	0	0.393701	0	0.257732	0	0	0
RNU6-135P	0.0592066	0.118765	0	0	0.149254	0	0	0	0	0	0	0	0	0	0.212766	0
HTR1D	0	0	0	0	0	0	0	0	0	0	0	0	0	0	0	0
AL109936.1	0	0	0	0	0	0	0	0	0	0	0.393701	0	0	0	0	0
LINC01355	1.18413	1.06888	0.094697	0	8.20896	4.73752	6.66667	0	4.86111	2.14352	9.84252	1.04167	0	0	2.12766	3.49794
AL109936.6	0.414446	0.23753	0.094697	0	0.298507	0	0.229885	0	0	0.0931966	2.75591	0	0	0	0.425532	0.411523
HNRNPR	54.8845	47.0309	14.4413	9.30233	90.1493	83.3547	73.1034	37.8788	56.25	66.356	97.2441	51.0417	3.86598	1.36986	45.7447	58.2305
ZNF436	1.48017	1.66271	0.94697	2.32558	7.61194	3.58515	5.28736	0.757576	1.04167	3.26188	7.87402	0	0.257732	0	2.55319	0.823045
ZNF436-AS1	0.651273	0.475059	0.0473485	1.16279	7.91045	0.768246	9.88506	0	0.694444	0.931966	6.69291	2.08333	0	0	0.425532	1.64609
RF00019-4	0	0	0	0	0	0	0	0	0	0	0	0	0	0	0	0
AL109936.2	0	0	0	0	0.149254	0	0	0	0	0	0	0	0	0	0	0
TCEA3	10.9532	0.356295	0.142045	0	1.04478	0.512164	0.689655	0.378788	0	0.465983	0.393701	0	0	0	0.425532	1.44033
AL357134.1	0	0	0	0	0	0	0	0	0	0	0	0	0	0	0	0
ASAP3	0.118413	0	0	0	0.597015	0	0.45977	0	0.347222	0.83877	0.393701	0	0	0	0	0
E2F2	1.42096	0.23753	8.23864	45.3488	21.0448	30.4738	4.36782	5.68182	2.08333	6.15098	13.7795	0	0.773196	1.36986	2.55319	8.84774
AL021154.1	0	0	0	0	0	0	0	0	0	0	0	0	0	0	0	0
ID3	9.17703	2.019	0.284091	0	0.149254	0.384123	0.689655	1.51515	32.2917	2.8891	0.393701	20.8333	0.515464	0	0.425532	2.46914
AL450043.1	0.0592066	0	0	0	0	0	0	0	0	0	0	0	0	0	0	0
MDS2	5.44701	0	0	0	0	0	0.45977	0	3.47222	0	0.393701	5.20833	0	0	0	1.02881
AL451000.1	0	0	0	0	0	0	0	0	0	0	0	0	0	0	0	0
RPL11	100	98.2185	76.0417	74.4186	99.1045	100	100	100	100	98.5089	100	100	52.5773	53.4247	99.1489	98.9712
ELOA	14.2096	11.5202	6.1553	5.81395	49.2537	34.5711	24.8276	15.9091	21.1806	25.2563	61.811	10.4167	0.515464	1.36986	12.3404	27.572
ELOA-AS1	2.84192	2.49406	0.568182	5.81395	26.4179	5.24968	17.0115	1.89394	2.43056	3.16869	32.6772	5.20833	0.257732	0	3.19149	11.3169
PITHD1	30.1954	22.6841	9.70644	50	78.6567	44.5583	43.2184	14.7727	29.8611	23.5788	84.252	16.6667	6.18557	9.58904	27.0213	34.3621
LYPLA2	23.505	20.7838	20.0758	8.13953	53.5821	41.8694	33.1034	18.9394	21.1806	26.0019	55.9055	16.6667	10.8247	9.58904	21.9149	23.251
GALE	3.25636	2.61283	1.51515	0	28.6567	18.1818	6.89655	3.40909	2.77778	7.08295	25.5906	0	0.257732	2.73973	6.59574	14.4033
HMGCL	7.40083	8.31354	5.91856	6.97674	43.1343	27.5288	25.0575	13.6364	9.375	19.8509	57.0866	10.4167	3.09278	2.73973	9.78723	14.1975
FUCA1	5.15098	4.98812	1.89394	5.81395	24.9254	15.8771	19.0805	14.0152	4.86111	24.0447	31.8898	0	0	0	5.74468	25.3086
CNR2	0.296033	2.3753	0.189394	1.16279	1.49254	0.640205	1.83908	0	32.2917	0.372787	4.72441	33.3333	0.257732	0	2.76596	0.205761
BTBD6P1	0	0.118765	0	0	0	0.128041	0	0	4.16667	0	0.393701	4.16667	0	0	0.638298	0
AL590609.3	0	0	0	0	0	0	0	0	0	0	0	0	0	0	0	0
MIR378F	0	0	0	0	0	0	0	0	0	0	0	0	0	0	0	0
AL590609.2	0	0	0.094697	0	0	0	0	0	0	0	0	0	0	0	0.212766	0
PNRC2	45.9443	42.1615	26.7992	41.8605	82.6866	72.4712	71.954	37.1212	47.5694	53.2153	91.3386	37.5	20.1031	28.7671	41.4894	27.3663
SRSF10	62.8182	49.5249	28.6458	19.7674	92.0896	78.8732	78.3908	36.3636	66.3194	54.1473	95.6693	57.2917	10.3093	10.9589	58.5106	62.7572
AL590609.1	0	0	0	0	0	0	0	0	0	0	0	0	0	0	0	0
AL591178.1	0	0	0	0	0	0	0	0	0	0	0	0	0	0	0	0
MYOM3	0	0	0.0473485	0	0	0.128041	0	0.378788	0	0	0	0	0.257732	0	0	0
AL591178.2	0	0	0	0	0	0	0	0	0	0	0	0	0	0	0	0
IL22RA1	0	0	0	0	0	0	0	0	0	0	0	0	0	0	0	0
IFNLR1	1.71699	1.54394	0.284091	0	0.895522	0.512164	0.689655	0.378788	9.02778	0.55918	0.787402	8.33333	1.03093	0	0.425532	12.5514
AL590683.1	0	0.118765	0	0	0	0	0	0	0	0	0	0	0	0	0	0
AL138902.1	0	0	0	0	0.447761	0	0	0	0	0	0	0	0	0	0	0.205761
GRHL3	0	0	0	0	0.447761	0	0	0	0	0	0	0	0	0	0	0.205761
STPG1	2.19065	1.30641	0.94697	0	15.6716	4.86556	7.12644	0.757576	5.90278	2.7959	15.748	2.08333	0.515464	0	0.638298	2.88066
NIPAL3	19.0053	11.0451	4.21402	1.16279	35.9701	19.7183	24.5977	2.65152	11.4583	9.50606	50.3937	7.29167	0.773196	0	12.9787	16.8724
RCAN3AS	1.59858	0.475059	0	0	0.149254	0.256082	1.14943	0.378788	0.347222	0.372787	0.393701	0	0	0	0.212766	0.205761
RCAN3	60.0947	11.4014	1.60985	0	5.8209	25.2241	20.2299	4.54545	19.4444	11.836	20.8661	20.8333	0.515464	0	2.76596	6.58436
AL445686.2	11.0124	1.42518	0.142045	0	0.298507	1.92061	2.75862	0	3.47222	1.30475	1.5748	4.16667	0	0	0.425532	0.617284
NCMAP	0	0	0.094697	0	0.149254	0.128041	0.45977	0	0	0	0	0	0.257732	0	0	1.44033
AL445686.1	0	0	0	0	0	0	0	0	0	0	0	0	0	0	0	0.205761
RF00019-5	0	0	0	0	0	0	0	0	0	0	0	0	0	0	0	0
SRRM1	69.8638	61.1639	40.1989	12.7907	91.3433	88.4763	88.5057	65.1515	69.0972	76.0485	97.2441	63.5417	19.3299	32.8767	64.2553	70.1646
AL445648.1	0	0	0	0	0	0	0	0	0	0	0	0	0	0	0	0
CLIC4	0.35524	0.23753	1.32576	23.2558	39.2537	32.0102	18.8506	14.0152	18.75	25.5359	45.6693	14.5833	1.03093	1.36986	0.638298	55.144
RNU6-1208P	0	0	0	0	0	0	0	0	0	0	0	0	0	0	0	0.205761
RUNX3	37.7738	51.6627	2.22538	1.16279	7.91045	16.3892	19.0805	9.84848	23.6111	10.1584	39.3701	8.33333	0.773196	0	67.4468	13.786
MIR6731	0.0592066	0	0	0	0	0	0	0	0	0	0	0	0	0	0	0
AL445471.1	0	0.118765	0	0	0	0	0	0	0	0	0	0	0	0	0	0
AL445471.2	0.118413	0	0	0	0	0	0	0	0	0	0	0	0	0	0	0
MIR4425	0	0	0	0	0	0	0	0	0	0	0	0	0	0	0	0
AL050344.2	0	0	0	0	0	0	0	0	0	0	0	0	0	0	0	0
AL050344.1	0.0592066	0.475059	0.094697	0	0	0	0	0	0	0	0	0	0	0	0	0
AL121994.1	0	0	0	0	0	0	0	0	0	0	0	0	0.257732	0	0	0
AL031432.1	0	0.118765	0	0	0	0	0.229885	0	0	0	0.787402	0	0	0	0	0
SYF2	61.7525	52.7316	58.0492	33.7209	79.2537	73.7516	84.3678	62.5	63.1944	69.4315	93.3071	43.75	60.8247	56.1644	57.8723	48.7654
AL031432.4	2.90112	3.08789	2.08333	1.16279	3.43284	7.29834	6.2069	0	3.47222	3.16869	10.2362	9.375	0.773196	1.36986	2.12766	1.85185
AL031432.5	0.296033	0.23753	0	0	0.447761	0.256082	0.229885	0	0	0	0.787402	0	0	1.36986	0	0.205761
RSRP1	68.9757	65.2019	85.4167	75.5814	86.4179	70.5506	83.6782	50.3788	68.0556	69.0587	93.3071	72.9167	77.0619	84.9315	74.2553	66.4609
AL031432.3	0.53286	0.118765	0.284091	1.16279	1.9403	1.66453	0.45977	0.378788	1.04167	0.931966	0.787402	0	0	0	0.425532	0.617284
AL031432.2	0.828893	0.23753	0.236742	1.16279	1.64179	0.256082	0.91954	0	1.38889	0.27959	1.1811	0	0.515464	0	0.212766	0.823045
RHD	0.71048	0.593824	0.331439	68.6047	33.5821	0.768246	2.52874	0	0.694444	0.652377	3.54331	0	0	1.36986	1.06383	1.02881
SDHDP6	0.236827	0.23753	0.094697	0	0.447761	0	0.229885	0	0	0	0	0	0.515464	0	0	0
AL928711.1	0	0	0	0	0	0	0	0	0	0	0	0	0	0	0	0
TMEM50A	54.7661	56.5321	46.8277	36.0465	83.2836	67.3496	71.954	55.303	36.1111	67.6608	93.3071	22.9167	60.0515	61.6438	52.5532	64.4033
RHCE	2.07223	0.950119	0.331439	61.6279	44.6269	1.92061	3.90805	0	0	0.55918	17.7165	0	0	0	1.06383	5.14403
AL031284.1	0.17762	0.118765	0	0	0.597015	0	0.229885	0	0	0.186393	0	0	0	0	0	0.205761
MACO1	16.1042	13.5392	8.38068	65.1163	63.2836	31.8822	37.4713	12.5	15.9722	19.3849	74.8031	8.33333	3.35052	6.84932	10.2128	45.4733
LDLRAP1	49.3783	17.4584	2.41477	0	29.403	18.4379	17.0115	3.40909	13.1944	6.80336	32.2835	4.16667	0.515464	0	13.8298	26.9547
AL606491.1	0.947306	1.18765	0	0	0	0.256082	0	0	0	0.465983	0.393701	0	0	0	0.638298	1.44033
MAN1C1	5.3878	1.42518	0.426136	1.16279	1.34328	5.12164	0.689655	2.27273	0	6.05778	1.5748	0	0.257732	0	1.91489	0.411523
AL031280.1	1.95382	0.356295	0.0473485	0	0.149254	0.640205	0.229885	0	0.347222	0.745573	0.393701	1.04167	0	0	0.212766	0
SELENON	8.64417	3.32542	2.50947	0	32.6866	41.8694	25.7471	12.1212	6.59722	23.7651	54.3307	3.125	1.03093	1.36986	3.61702	3.7037
AL020996.2	0	0	0	0	0	0	0	0	0	0	0	0	0	0	0	0
AL020996.1	2.13144	0.831354	0.331439	0	3.13433	1.53649	2.29885	1.13636	1.38889	1.77074	3.54331	1.04167	0	0	1.2766	1.85185
MTFR1L	9.29544	6.29454	9.65909	1.16279	43.7313	29.1933	30.8046	13.2576	9.375	17.8006	60.2362	9.375	3.09278	2.73973	6.80851	19.5473
AL020996.3	0	0	0	0	0	0	0	0	0	0	0	0	0	0	0	0
AUNIP	0.296033	0	0.331439	0	27.9104	12.1639	3.90805	0	0.347222	0.465983	25.9843	0	0.257732	1.36986	0.212766	1.02881
AL033528.2	0.769686	0.712589	0.804924	0	2.53731	2.30474	1.14943	0.757576	0.347222	1.86393	4.72441	0	0.257732	0	1.06383	0.411523
PAQR7	0.71048	0.23753	3.0303	1.16279	6.56716	5.76184	14.2529	1.89394	1.04167	5.685	24.8031	0	0	0	0.638298	1.85185
RF00019-6	0	0	0	0	0	0	0	0	0	0	0	0	0	0	0	0
STMN1	29.1297	21.734	7.7178	13.9535	94.0299	87.7081	89.4253	7.57576	18.75	15.0979	98.4252	16.6667	3.35052	1.36986	26.1702	19.9588
SNRPFP2	0	0	0	0	0	0	0	0	0	0	0	0	0	0	0	0
AL033528.1	0	0	0	0	0	0	0.229885	0	0	0	0	0	0	0	0	0
MIR3917	0	0	0	0	0	0	0	0	0	0	0.393701	0	0	0	0	0
PAFAH2	5.3878	9.61995	2.74621	0	6.56716	13.8284	8.50575	3.40909	2.43056	9.22647	15.3543	2.08333	1.80412	1.36986	14.4681	3.7037
RNU6-110P	0	0	0	0	0	0	0	0	0	0	0	0	0	0	0	0
RF00492	0	0	0	0	0	0	0	0	0	0	0	0	0	0	0	0
RF00283	0	0	0	0	0	0	0	0	0	0	0	0	0	0	0	0
EXTL1	0.118413	0	0	0	0.149254	0	0.229885	0	0	0.0931966	0	0	0	0	0	0
SLC30A2	0	0.23753	0.142045	0	0.149254	0	0	0	0	0.372787	0.393701	0	0	0	0	0.411523
AL391650.2	0	0	0	0	0	0	0	0	0	0	0	0	0	0	0	0
TRIM63	0	0	0	0	0.149254	0	0	0	0	0.0931966	0	0	0	0	0	0
PDIK1L	8.34813	4.98812	11.8845	3.48837	40.597	22.2791	19.3103	2.27273	3.47222	9.50606	59.4488	5.20833	0.773196	1.36986	4.68085	16.6667
FAM110D	0.0592066	0.23753	0.142045	0	2.83582	0.384123	1.14943	0	0	0.83877	4.72441	0	0	0	0	0.205761
C1orf232	0	0	0	0	0.149254	0	0	0	0	0	0	0	0	0	0	0
AL391650.1	0	0.23753	0.0473485	0	1.9403	0.640205	0.45977	0.757576	0	0.27959	1.1811	1.04167	0	0	0.638298	0.411523
ZNF593	10.4796	8.07601	0.710227	1.16279	63.8806	39.3086	39.0805	23.1061	10.7639	21.9944	78.7402	12.5	0	0	6.17021	65.4321
CNKSR1	1.12493	0	0.094697	0	1.49254	0.896287	7.58621	0.378788	0.347222	0.27959	5.90551	0	0	0	0	23.0453
CATSPER4	0	0	0	0	0	0	0	0	0	0	0	0	0	0	0	0.205761
AL355877.1	0.118413	0	0.142045	0	0.597015	0.128041	2.29885	0	0.347222	0.186393	3.14961	0	0	0	0.212766	1.02881
AL355877.3	0	0	0	0	0.149254	0.128041	0	0	0	0	0	0	0	0	0	0
CEP85	4.55891	3.80048	3.0303	1.16279	38.3582	21.6389	16.092	6.06061	3.81944	8.85368	42.9134	2.08333	0.515464	0	5.53191	6.58436
AL355877.2	0	0	0	0	0	0	0.229885	0	0	0.0931966	0.393701	0	0	0	0	0
SH3BGRL3	95.9739	95.7245	94.6023	23.2558	72.2388	98.5915	97.0115	100	92.3611	89.0028	95.2756	88.5417	96.6495	100	94.4681	83.3333
UBXN11	15.4529	9.50119	9.2803	1.16279	24.3284	36.2356	10.1149	44.697	12.5	40.5405	13.7795	11.4583	4.89691	5.47945	8.51064	5.96708
CD52	94.9082	82.4228	5.53977	3.48837	7.91045	33.2907	69.4253	56.4394	100	50.699	28.7402	100	4.12371	2.73973	52.3404	13.5802
CRYBG2	1.71699	0.23753	4.11932	0	0.298507	0.256082	0.229885	0	1.38889	0	0	0	3.09278	4.10959	0	0
AL451139.1	0.0592066	0	0.0473485	0	0	0	0	0	0	0.0931966	0	1.04167	0	0	0	0
ZNF683	0.828893	2.61283	0.0473485	0	0	0	0	0	0.347222	0	0	0	0	0	0.425532	0
LIN28A	0.0592066	0.118765	0.094697	0	0.746269	0.128041	0.229885	0	0	0	1.9685	0	0	0	0.638298	0.205761
DHDDS	6.45352	6.17577	4.54545	2.32558	30.7463	21.3828	16.3218	5.30303	10.7639	14.6319	42.5197	8.33333	1.28866	1.36986	8.7234	24.6914
AL513365.1	9.88751	6.4133	5.96591	0	20.1493	17.5416	12.1839	0	12.1528	18.7325	46.4567	5.20833	0.515464	2.73973	4.04255	7.61317
AL513365.2	0.118413	0	0.378788	0	0	0.384123	0.689655	0	0	0.27959	0.393701	0	0	0	0	0
HMGN2	65.8378	63.0641	82.339	24.4186	95.8209	98.0794	91.4943	78.4091	68.75	82.6654	98.0315	67.7083	36.5979	57.5342	60	64.1975
DPPA2P2	0	0	0.142045	0	0	0	0	0	0	0	0	0	0.515464	1.36986	0	0
RPS6KA1	29.2481	28.0285	56.25	8.13953	57.3134	62.484	40	32.5758	21.875	45.014	61.0236	14.5833	62.8866	68.4932	35.3191	12.3457
MIR1976	0	0	0	0	0	0	0	0	0	0	0	0	0	0	0	0
RN7SL679P	0	0	0	0	0	0	0	0	0	0	0	0	0	0	0	0
RF00019-7	0	0	0	0	0	0	0	0	0	0	0	0	0	0	0	0
RNU7-29P	0	0	0	0	0	0	0	0	0	0	0	0	0	0	0	0
AL627313.1	0	0	0	0	0	0	0	0	0	0	0	0	0	0	0	0
RF01210	0	0	0	0	0	0	0	0	0	0	0	0	0	0	0	0
AL627082.1	0	0	0	0	0	0	0	0	0	0	0	0	0	0	0	0
AL512408.1	0.296033	0.356295	0.0473485	0	1.64179	1.79257	0.91954	0	0	0.27959	1.1811	0	0	0	0.425532	0
ARID1A	43.5761	31.7102	57.8125	27.907	71.6418	75.4161	60	40.9091	41.3194	62.7213	90.9449	28.125	58.7629	61.6438	43.8298	41.9753
PIGV	4.61812	6.17577	4.40341	1.16279	30.4478	12.1639	19.5402	3.0303	3.47222	8.10811	38.9764	2.08333	3.86598	1.36986	8.29787	10.4938
RN7SL165P	0.17762	0	0.0473485	0	0.447761	0	0	0	0.347222	0.0931966	0.393701	0	0.257732	0	0.425532	0
ZDHHC18	18.4725	15.9145	29.0246	1.16279	16.7164	14.8528	12.4138	3.40909	6.94444	7.08295	20.0787	6.25	62.8866	56.1644	13.8298	19.1358
SFN	0	0	0.331439	1.16279	0	0	0.229885	0	0	0	0.787402	0	0.773196	0	0	0.617284
GPN2	6.98638	6.17577	4.87689	0	34.7761	25.4802	16.092	5.68182	9.02778	15.4706	41.7323	4.16667	2.83505	2.73973	7.44681	13.9918
AL034380.1	0	0	0	0	0	0	0	0	0	0.0931966	0	0	0	0	0	0
GPATCH3	6.39432	4.3943	3.26705	2.32558	27.7612	18.4379	12.1839	8.71212	3.125	12.3952	25.5906	2.08333	1.03093	2.73973	6.38298	11.9342
NUDC	39.0764	31.7102	10.3693	3.48837	87.1642	66.3252	67.3563	34.8485	39.9306	43.3364	91.3386	30.2083	5.41237	5.47945	35.7447	56.1728
NR0B2	0	0	0	0	0	0	0	0	0	0	0.393701	0	0	0	0	0
KDF1	2.19065	0.593824	0	0	0.149254	0.128041	0	0	2.43056	0	0	0	0.257732	0	0	4.93827
RPL12P13	0.17762	0.118765	0.0473485	0	1.34328	0.256082	0.45977	0.378788	0	0	1.1811	0	0	0	0	0.617284
AL356390.1	0	0	0	0	0.298507	0	0	0	0	0	0	0	0	0	0	0
OSTCP2	0	0	0	0	0.149254	0	0	0.378788	0	0	0	0	0	0	0	0
TRNP1	0.0592066	0	0	0	0.298507	0.640205	0.229885	0	0	0.931966	0	0	0	0	0.212766	0
TENT5B	0	0	0	0	0.895522	0.128041	0	0	0	0	0.393701	0	0	0	0	0
SLC9A1	7.87448	9.50119	17.3769	0	12.3881	16.3892	10.5747	6.81818	7.98611	12.9543	29.5276	3.125	26.8041	26.0274	11.7021	6.79012
AL590640.2	0.0592066	0	0	0	0.149254	0	0	0.378788	0	0	0	0	0	0	0	0
CHCHD3P3	0.118413	0.118765	0	0	0.447761	0	0.45977	0	0	0.0931966	0	0	0	0	0	0
NPM1P39	0.236827	0.23753	0.094697	0	5.22388	0.768246	2.29885	0	0	0.186393	5.90551	0	0	0	0.212766	1.23457
SNRPEP7	0	0	0	0	0	0	0	0	0	0	0	0	0	0	0	0
AL590640.1	0	0	0	0	0	0	0	0	0	0	0	0	0	0	0	0
WDTC1	14.2096	13.5392	29.4981	12.7907	39.403	26.5045	22.9885	10.2273	12.8472	21.7148	48.4252	10.4167	30.1546	32.8767	19.3617	12.5514
RF00019-8	0	0	0	0	0	0	0	0	0	0	0	0	0.257732	0	0	0
FO393419.3	0.118413	0.23753	0.236742	0	0.149254	0.512164	0	0	0	0.372787	1.1811	0	1.03093	2.73973	0	0
TMEM222	12.2558	11.4014	3.59848	3.48837	51.4925	16.2612	27.1264	7.57576	13.1944	10.904	44.0945	11.4583	2.83505	1.36986	12.9787	19.9588
RNU6-48P	0	0	0	0	0	0	0	0	0	0.0931966	0	0	0	0	0	0
ACTG1P20	0.0592066	0.118765	0.189394	0	2.08955	0.384123	0.45977	1.13636	0.347222	0.186393	1.5748	0	0	0	0	0.823045
SYTL1	36.7081	35.7482	27.178	2.32558	14.3284	23.8156	40.2299	7.19697	29.1667	12.302	27.9528	22.9167	14.9485	19.1781	44.6809	55.3498
MAP3K6	3.01954	5.22565	0.473485	0	5.67164	20.9987	14.4828	8.71212	2.08333	10.0652	7.48031	0	0	0	4.25532	9.25926
FCN3	0	0	0	0	0	0	0	0	0	0.465983	0	0	0	0	0	0
CD164L2	0	0	0	0	0	0	0	0	0	0	0	0	0	0	0	0.205761
FO393419.1	0	0	0	0	0	0	0	0	0	0	0	0	0	0	0	0
GPR3	0.118413	0.118765	0	0	0.149254	0.384123	0.229885	0	0.694444	0.186393	1.9685	0	0	0	0	0
WASF2	53.1676	43.943	59.9432	70.9302	84.7761	79.6415	88.9655	64.3939	53.125	75.3961	91.3386	44.7917	37.8866	41.0959	47.8723	47.9424
FO393419.2	0	0	0	0	0	0	0	0	0.347222	0.27959	0	0	0	0	0	0
BX293535.1	1.7762	0.356295	0	0	0.895522	0.384123	1.83908	0.757576	0	0.745573	1.9685	0	0	0	0	0.411523
AHDC1	7.51924	4.51306	0.662879	1.16279	6.1194	10.6274	28.5057	2.27273	5.55556	7.54893	25.9843	2.08333	0.515464	0	10.8511	3.49794
FGR	2.78271	17.2209	89.536	5.81395	3.28358	67.7337	3.90805	71.5909	9.375	73.9049	11.4173	7.29167	83.7629	83.5616	50.4255	5.14403
AL031729.1	0.118413	0.23753	0.189394	0	1.19403	1.66453	1.37931	0.757576	0	0.0931966	2.75591	0	0	0	0	0.205761
LINC02574	0.17762	0	0	0	0	0.512164	0.229885	0	0	0.0931966	0	0	0	0	0	0
IFI6	22.913	21.2589	1.51515	1.16279	19.2537	21.895	33.3333	18.1818	14.5833	26.1883	36.6142	6.25	1.03093	0	16.383	33.9506
AL445490.1	0.17762	0	0	0	0	0	0	0	0	0	0	0	0	0	0	0.205761
RNU6-949P	0	0	0	0	0	0	0	0	0	0	0	0	0	0	0	0
CHMP1AP1	0	0	0	0	0	0	0	0	0	0	0	0	0	0	0	0
RNU6-424P	0	0	0	0	0	0	0	0	0	0	0	0	0	0	0	0
FAM76A	9.70989	11.639	4.87689	0	26.7164	20.4866	15.4023	6.81818	10.4167	15.0979	38.5827	9.375	0	1.36986	11.2766	11.1111
AL020997.1	0	0.118765	0.0473485	0	0.447761	0.256082	0.45977	0	0	0	0.393701	0	0	0	0.425532	0
RPEP3	0.0592066	0	0	0	0	0	0	0	0	0	0	0	0	0	0	0
STX12	14.0912	12.3515	15.8144	3.48837	33.1343	29.1933	25.977	32.197	18.0556	43.616	49.6063	14.5833	10.3093	10.9589	12.5532	25.1029
AL020997.2	0.236827	0.475059	0.331439	0	0.298507	1.28041	0.229885	0.378788	0.347222	1.39795	3.14961	1.04167	0.257732	0	0.212766	1.23457
AL020997.3	0	0.118765	0.094697	0	0.149254	0.128041	0	0	0.347222	0.27959	0.393701	0	0	1.36986	0	0.205761
RNU6-1245P	0	0	0	0	0	0	0	0	0	0	0	0	0	0	0	0
PPP1R8	10.3612	9.02613	7.24432	1.16279	45.0746	29.5775	22.5287	8.71212	10.4167	18.1733	57.874	5.20833	2.31959	2.73973	10.8511	14.4033
SCARNA1	0	0	0.0473485	0	0.298507	0	0	0	0	0	0	0	0	0	0	0
THEMIS2	9.70989	15.9145	27.8883	0	18.3582	45.0704	25.0575	51.5152	13.1944	57.8751	26.7717	4.16667	44.8454	42.4658	30.6383	30.2469
RPA2	34.2214	33.1354	13.9678	1.16279	72.8358	46.3508	45.2874	17.0455	34.0278	25.0699	83.8583	25	8.24742	9.58904	43.1915	34.3621
SMPDL3B	0.17762	0.23753	0.142045	0	12.0896	2.43278	10.5747	0	0	0.745573	13.7795	0	0	0	1.06383	36.0082
AL512288.1	0	0	0.0473485	0	0	0	0.45977	0	0	0	1.1811	0	0	0	0	0
XKR8	6.09828	6.65083	6.72348	0	16.2687	7.17029	13.5632	4.92424	3.47222	5.685	18.8976	2.08333	12.6289	8.21918	9.78723	15.6379
EYA3	8.88099	9.02613	9.84848	2.32558	36.7164	27.6569	19.5402	6.81818	10.4167	15.3774	51.1811	5.20833	5.15464	2.73973	11.9149	18.107
AL512288.2	0.118413	0.23753	0.0473485	0	0.298507	0.128041	0.229885	0	0.694444	0.372787	1.1811	0	0	0	0.212766	0.205761
RN7SL559P	1.00651	0.712589	1.98864	0	3.28358	4.22535	1.14943	0	1.04167	1.58434	11.4173	0	1.54639	0	0.638298	1.02881
SPCS2P4	0.53286	1.06888	0.852273	0	2.68657	1.92061	2.52874	0.757576	0.694444	1.11836	3.54331	1.04167	0.515464	0	0.638298	17.0782
AL137792.2	0	0	0	0	0	0	0	0	0	0	0	0	0	0	0	0
AL137792.1	0	0	0.520833	0	0	0	0	0	0	0	0.393701	0	0.257732	0	0.212766	0
RNU6-176P	0	0	0.0473485	0	0	0.128041	0	0	0	0	0	0	0	0	0	0
PTAFR	0.17762	0.593824	35.9848	1.16279	4.77612	30.4738	13.5632	26.1364	4.86111	40.5405	14.9606	5.20833	31.9588	26.0274	1.06383	5.14403
DNAJC8	51.5098	46.0808	30.5871	17.4419	88.6567	81.0499	75.6322	49.6212	54.5139	59.1799	94.0945	39.5833	11.8557	19.1781	55.7447	63.1687
ATP5IF1	66.0746	64.2518	44.2708	26.7442	95.3731	85.6594	86.4368	60.9848	61.1111	70.4567	97.6378	45.8333	32.2165	27.3973	69.1489	85.5967
AL353622.1	1.18413	2.13777	1.79924	2.32558	8.35821	5.24968	11.4943	0.757576	4.16667	1.58434	19.2913	0	0.257732	0	4.25532	6.3786
AL353622.2	1.12493	0.475059	0.142045	0	0.895522	0.896287	0	0.378788	0	0.372787	0.787402	0	0.257732	0	0.851064	1.64609
SESN2	4.91415	8.31354	31.0133	0	7.61194	13.0602	13.5632	5.30303	2.43056	9.69245	13.7795	4.16667	21.9072	28.7671	7.87234	7.40741
MED18	5.15098	5.34442	7.95455	1.16279	18.209	12.9321	11.4943	4.92424	5.90278	11.1836	27.9528	6.25	6.95876	6.84932	7.65957	10.0823
PHACTR4	24.6892	19.9525	18.2292	3.48837	58.5075	50.064	57.4713	19.697	27.0833	37.931	86.2205	10.4167	4.38144	16.4384	25.3191	23.0453
RF00019-9	0.17762	0	0.0473485	0	0	0	0	0	0	0.0931966	0	0	0	0	0	0
CR391992.1	0.414446	0.593824	0.852273	0	2.08955	3.20102	2.06897	0	0	1.30475	24.8031	1.04167	0.515464	0	0.425532	0.411523
RNU6ATAC27P	0.0592066	0	0	0	0.298507	0.640205	0.229885	0	0	0.186393	4.33071	0	0	0	0	0
RCC1	6.2759	3.32542	1.75189	0	55.5224	38.1562	25.2874	7.57576	4.51389	14.0727	57.4803	3.125	0.773196	1.36986	6.80851	11.3169
SNHG3	26.7022	16.7458	5.72917	5.81395	74.1791	52.4968	58.3908	17.803	30.5556	33.9236	88.189	26.0417	3.35052	4.10959	16.383	28.1893
SNORA73A	0	0	0	0	0	0	0	0	0	0	0	0	0	0	0	0
SNORA73B	0.0592066	0	0.094697	2.32558	1.19403	1.15237	0.689655	0	0	0.0931966	0.787402	0	0	0	0	0.411523
PRDX3P2	0	0	0	0	0	0.128041	0	0	0	0.0931966	0.393701	0	0	0	0	0
AL513497.1	0.118413	0	0.094697	0	0.895522	1.02433	0.689655	0	0.347222	0.27959	4.72441	0	0	0	0	0.411523
TRNAU1AP	17.466	17.3397	16.1932	2.32558	50.2985	41.9974	28.5057	17.803	20.4861	29.7297	55.1181	16.6667	5.6701	6.84932	17.8723	23.8683
SNHG12	31.0835	20.5463	10.6534	3.48837	51.4925	33.8028	62.069	13.6364	25	17.055	66.5354	16.6667	1.80412	2.73973	16.383	22.6337
SNORD99	0.0592066	0	0.094697	0	0	0.128041	0.229885	0	0	0	1.1811	0	0	0	0	0
SNORA61	0	0	0	0	0	0	0	0	0	0	0	0	0	0	0	0
SNORA44	0	0	0	0	0	0	0	0	0	0	0	0	0	0	0	0
SNORA16A	0	0	0	0	0	0	0	0	0	0	0	0	0	0	0	0
SNORA16A-1	0	0	0	0	0	0	0	0	0	0	0	0	0	0	0	0
TAF12	21.0184	21.8527	26.4678	4.65116	56.5672	37.7721	38.6207	20.8333	20.4861	32.712	67.3228	16.6667	23.7113	21.9178	24.8936	38.2716
RAB42	0.118413	0.118765	0.0473485	0	0.746269	2.8169	1.37931	0.757576	0	1.39795	2.75591	0	0.515464	0	0	1.23457
LINC01715	1.30255	0.950119	0	0	3.58209	0.768246	1.14943	0.378788	1.73611	0.83877	2.3622	0	0	0	1.48936	6.17284
AL360012.1	0	0	0	0	0	0	0	0	0	0	0	0	0	0	0	0
RNU11	0.17762	0	1.18371	0	0.447761	2.30474	0.229885	0.378788	0.694444	1.30475	1.1811	0	0	0	0.212766	0.617284
GMEB1	12.0782	9.14489	12.0265	4.65116	35.6716	34.443	23.6782	12.1212	13.5417	19.1985	55.1181	11.4583	7.47423	13.6986	14.8936	16.4609
RF00422	0	0	0	0	0.149254	0	0	0	0	0	0	0	0	0	0	0
YTHDF2	31.794	26.3658	17.3295	2.32558	73.7313	58.7708	54.9425	29.5455	26.7361	39.795	87.0079	12.5	8.76289	9.58904	29.3617	49.3827
OPRD1	0.0592066	0	0.426136	0	0.149254	0.384123	0	0	0	0.372787	0.787402	0	0.515464	0	0	0
AL009181.1	0.118413	0	0	1.16279	1.04478	0.128041	0.229885	0	0	0.186393	0.393701	0	0	0	0	0.205761
RF00019-10	0	0	0	0	0	0	0	0	0	0	0	0	0	0	0	0
EPB41	57.4304	52.9691	49.5265	97.6744	71.3433	50.7042	41.8391	15.1515	45.8333	35.4147	77.1654	41.6667	36.0825	39.726	55.3191	34.7737
AL138785.1	0.296033	0	0.094697	0	0.149254	0.128041	0.229885	0.378788	0	0.186393	0.787402	0	0	0	0.212766	0
RF00019-11	0	0	0	0	0.149254	0	0	0	0	0	0	0	0	0	0	0
RF00017	0.473653	0.593824	0.520833	3.48837	1.64179	1.15237	1.14943	0.378788	0.694444	0.652377	2.75591	0	0.257732	1.36986	0	0
TMEM200B	0.414446	0.712589	0.0473485	2.32558	0.895522	0	0.229885	0	0	0.372787	0.787402	3.125	0	0	0	0.411523
AL357500.1	0	0	0	0	0	0	0	0	0	0.0931966	0	0	0	0	0	0
SRSF4	49.9112	44.2993	52.3674	9.30233	84.6269	72.0871	61.8391	37.5	51.0417	57.1295	92.9134	38.5417	48.7113	42.4658	48.2979	60.9053
RF02271	0	0	0	0	0	0	0	0	0	0	0	0	0	0	0	0
MECR	2.84192	1.78147	0.094697	0	44.7761	14.9808	15.8621	4.92424	5.20833	5.31221	48.0315	1.04167	0	0	1.48936	10.9053
AL590729.1	0	0	0	0	0	0	0.229885	0	0	0	0	0	0	0	0	0
PTPRU	0	0.118765	0	0	0	1.02433	0.689655	0.378788	0	0.27959	0.393701	0	0	0	0.212766	0.205761
LINC01756	0	0	0	0	0	0	0	0	0	0	0	0	0	0	0	0
AL671862.1	0	0	0	0	0	0	0	0	0	0	0	0	0	0	0	0
AC092265.1	0	0	0	0	0	0	0	0	0	0	0	0	0	0	0	0
AL645944.2	0	0	0	0	0	0	0	0	0	0	0	0	0	0	0	0
AL645944.1	0	0	0	0	0	0	0	0	0	0	0	0	0	0	0	0
LINC01648	0	0	0	0	0	0	0	0	0	0	0	0	0	0	0	0
AL137076.1	0	0	0.0473485	0	0	0	0	0	0	0	0	0	0	0	0	0
AL021921.1	0	0	0	0	0	0	0	0	0	0	0	0	0	0	0	0
AL161638.2	0	0	0	0	0	0	0	0	0	0	0	0	0	0	0	0
AL161638.1	0	0	0	0	0	0	0	0	0	0	0	0	0	0	0	0
MATN1	0.473653	0	0	0	0.597015	0	0.91954	0.378788	0	0.0931966	0.393701	1.04167	0	0	0.212766	0.823045
MATN1-AS1	5.68384	4.27553	0.331439	2.32558	5.37313	4.09731	3.21839	1.51515	6.59722	1.11836	5.11811	6.25	0.257732	0	3.40426	4.52675
LAPTM5	86.5601	78.9786	92.0455	5.81395	74.7761	95.0064	84.3678	96.2121	97.5694	89.0028	90.9449	95.8333	96.9072	97.2603	70	43.2099
MIR4420	0	0	0	0	0	0.128041	0	0	0	0	0	0	0	0	0	0
AL137027.1	0	0	0	0	0	0	0	0	0	0	0	0	0	0	0	0
LINC01778	0	0	0	0	0	0	0	0	0	0	0	0	0	0	0	0
RN7SKP91	0	0	0	0	0	0	0	0	0	0	0	0	0	0	0	0
AL445235.1	0	0	0	0	0	0	0	0	0	0	0	0	0	0	0	0
SDC3	0.0592066	0	0.0473485	0	9.40299	0.512164	0	4.92424	0	7.45573	1.1811	0	0	0	0	0.411523
RN7SL371P	0	0	0	0	0	0	0	0	0	0.186393	0.393701	0	0	0	0	0
PUM1	34.5175	25.772	46.875	23.2558	68.6567	61.3316	51.4943	32.197	35.4167	55.3588	83.8583	28.125	25.7732	23.2877	28.7234	34.5679
AL356320.2	0.296033	0	0	0	0.447761	0	0	0	0	0.0931966	1.9685	0	0	0	0.212766	0.411523
AL356320.1	0.35524	0.356295	0	0	0	0.128041	0.45977	0	0.347222	0.372787	1.5748	0	0	0	0.212766	0.205761
SELENOWP1	0	0	0	0	0	0	0	0	0	0	0	0	0	0	0	0
AC114495.1	0	0	0	0	0	0	0	0	0	0	0	0	0	0	0	0
NKAIN1	0	0	0	0	0.149254	0	0	0	0	0	0	0	0	0	0	0
SNRNP40	24.63	23.753	6.81818	2.32558	78.209	51.6005	53.3333	20.8333	23.6111	23.3924	79.5276	26.0417	1.03093	1.36986	21.4894	31.07
AC114495.2	0.888099	0.23753	0.899621	0	4.02985	5.76184	1.37931	0	0.347222	2.51631	9.44882	0	0.257732	0	1.91489	0.411523
ZCCHC17	17.9988	21.2589	13.9205	2.32558	59.5522	48.2714	43.2184	18.5606	16.3194	27.6794	75.9843	9.375	3.35052	2.73973	31.0638	31.4815
AL451070.1	0.0592066	0	0	0	5.8209	0.128041	0.45977	0	0	0	0.393701	0	0	0	0	0.205761
FABP3	0.0592066	0	0	0	0.149254	0.128041	0	0	0.347222	0	0	0	0	0	0	0.205761
SERINC2	0.296033	0	5.16098	3.48837	4.77612	14.7247	3.67816	6.43939	1.38889	7.82852	1.5748	1.04167	1.54639	5.47945	0.212766	2.88066
AC209007.1	0	0.118765	0	0	0	0.128041	0	0	0	0	0	0	0	0	0	0
RNU6-40P	0	0	0.142045	0	0	0	0	0	0	0	0	0	0	0	0	0
LINC01225	0	0	0	0	4.32836	0.128041	1.37931	0	0	0.27959	3.54331	0	0	0	0	0
RF00019-12	0	0	0	0	0	0	0	0	0	0	0	0	0	0	0	0
LINC01226	0.118413	0	0.142045	0	4.32836	1.28041	3.90805	0	0	1.67754	6.29921	0	0.257732	0	0	1.02881
AC114488.1	0	0	0	0	0	0	0	0	0	0	0	0	0	0	0	0
TINAGL1	0	0	0	0	0.149254	0.256082	0.689655	0	0	1.95713	0	0	0	0	0.212766	0.617284
HCRTR1	0	0	0	0	0	0	0	0	0	0	0	0	0	0	0	0
PEF1	14.4464	15.4394	18.75	2.32558	59.5522	31.242	40.9195	17.0455	14.5833	19.5713	65.3543	4.16667	6.18557	6.84932	20	24.0741
AC114488.2	0.236827	0.356295	0.331439	0	1.04478	0	0	0.378788	0	0.186393	0.393701	0	0	0	0.425532	0.205761
AC114488.3	0.236827	0.23753	0	0	0.597015	0.384123	0.45977	0	0	0.0931966	0.393701	0	0	0	0.425532	0
COL16A1	0.118413	0	0.284091	0	0.597015	0	0.91954	0	0	0.745573	1.1811	0	0	0	0.212766	0.205761
ADGRB2	0.296033	0.23753	0	0	0	0	0	0	0.347222	0.186393	0.393701	0	0	0	2.34043	0.823045
MIR4254	0	0	0	0	0	0	0	0	0	0	0	0	0	0	0	0
AL354919.2	0.0592066	0	0.0473485	0	0	0	0	0	0	0.0931966	0	0	0	0	0	0
SPOCD1	0	0	0.0473485	0	0	0.128041	0	0	0	0	0	0	0	0	0	0
AL354919.1	0.118413	0.118765	0.094697	0	0	0	0	0	0	0.186393	0.393701	0	0	0	0.212766	0
AL136115.2	0.473653	0.356295	2.27273	0	1.19403	2.68886	0.45977	0	1.04167	1.49115	1.9685	1.04167	1.03093	1.36986	0.638298	0.823045
PTP4A2	69.0349	74.228	80.2083	34.8837	85.8209	82.2023	68.9655	61.7424	54.1667	78.5648	96.8504	40.625	64.9485	71.2329	65.9574	71.3992
AL136115.1	0.236827	0.712589	0.236742	1.16279	0.298507	0	0	0	0	0.27959	0.787402	0	0.257732	0	0.425532	0
AL136115.3	0.0592066	0	0	0	0	0	0	0	0	0	0	0	0	0	0	0
KHDRBS1	62.0485	51.4252	36.3636	4.65116	88.3582	87.0679	87.1264	51.1364	49.6528	67.3812	98.8189	40.625	18.8144	28.7671	50	59.6708
AL445248.1	0.769686	0.593824	2.22538	0	3.13433	2.04866	2.06897	0	0.694444	1.21156	9.84252	0	2.06186	2.73973	1.91489	1.02881
TMEM39B	5.3878	4.27553	3.17235	1.16279	33.4328	20.8707	26.2069	9.09091	6.94444	11.836	46.4567	4.16667	1.03093	2.73973	4.89362	17.6955
MIR5585	0	0	0	0	0	0	0	0	0	0	0	0	0	0	0	0
RF00017-1	0	0	0	0	0	0	0	0.378788	0	0	0	0	0	0	0	0
KPNA6	20.8999	15.7957	23.2955	22.093	51.9403	43.5339	30.3448	17.803	20.1389	29.8229	67.3228	17.7083	9.02062	16.4384	20	22.8395
AL049795.2	0.0592066	0	0.378788	0	0.447761	0.512164	0	0.378788	0	0.465983	1.5748	0	0.257732	0	0.212766	0.205761
TXLNA	13.5583	10.9264	6.01326	2.32558	39.8507	36.1076	30.3448	10.9848	14.5833	20.6897	63.7795	8.33333	1.28866	1.36986	14.8936	33.5391
CCDC28B	4.14446	5.93824	0.61553	1.16279	65.6716	11.1396	25.977	3.40909	5.55556	5.77819	78.3465	2.08333	0.773196	0	19.1489	1.85185
AL049795.1	0.296033	0.23753	0.189394	0	1.79104	0.640205	0.229885	0.378788	0	0.27959	0.787402	0	0.257732	0	0.212766	0.205761
IQCC	0.828893	0.475059	0.142045	1.16279	14.0299	4.09731	1.83908	0.378788	0.694444	0.652377	9.84252	0	0.257732	0	1.2766	1.64609
DCDC2B	0.236827	0.356295	0.094697	0	0.149254	0.384123	0.229885	0	0.694444	0.652377	3.14961	0	0.257732	0	0.851064	0
TMEM234	4.55891	4.3943	4.45076	0	16.7164	5.37772	9.65517	3.40909	3.81944	5.87139	20.0787	2.08333	4.38144	1.36986	5.53191	6.79012
EIF3I	45.4707	33.4917	15.1042	13.9535	84.1791	73.8796	76.7816	43.1818	43.75	56.1976	91.7323	40.625	6.18557	1.36986	38.5106	61.7284
MTMR9LP	0.888099	0.475059	0.142045	0	1.49254	0.128041	1.37931	0	1.38889	1.11836	1.9685	2.08333	0.257732	0	2.12766	14.1975
FAM167B	0.473653	0.593824	0.189394	0	0.298507	0	0.229885	0.757576	0	1.49115	0	2.08333	0	0	1.06383	0.617284
LCK	81.1723	78.0285	1.04167	2.32558	1.19403	2.68886	2.52874	1.89394	12.5	2.42311	2.75591	3.125	0.515464	0	64.2553	3.08642
RF00017-2	0	0	0	0	0.149254	0	0	0	0.347222	0	0	0	0	0	0	0
RF00019-13	0	0	0	0	0	0	0	0	0	0	0	0	0	0	0	0
HDAC1	41.0302	35.2732	22.5852	3.48837	73.4328	54.9296	55.1724	27.2727	38.1944	36.9059	81.8898	23.9583	10.567	13.6986	37.4468	25.9259
MARCKSL1	18.8869	10.6888	5.30303	1.16279	74.0299	10.6274	45.2874	6.43939	46.5278	8.2013	87.7953	25	7.21649	2.73973	9.3617	30.6584
AL109945.1	0	0	0	0	0	0	0	0	0	0	0	0	0	0	0	0
TSSK3	0.651273	0	0.0473485	4.65116	1.49254	0.512164	1.14943	0	0	0.372787	2.75591	1.04167	0	0	0.212766	0.411523
FAM229A	2.36827	1.30641	2.88826	9.30233	6.26866	3.58515	4.5977	2.65152	1.73611	2.7959	12.2047	1.04167	1.03093	2.73973	2.55319	3.08642
BSDC1	23.2682	18.6461	24.2424	73.2558	62.3881	28.2971	34.7126	14.7727	19.7917	23.9515	67.7165	18.75	13.1443	19.1781	21.2766	32.0988
GAPDHP20	0	0	0.0473485	0	0	0	0	0	0	0	0	0	0	0	0	0
AL356986.1	0	0	0	0	0	0	0	0	0	0	0	0	0	0	0	0
LRRC37A12P	0	0	0	0	0	0	0	0	0	0	0	0	0	0	0	0
RN7SL122P	0	0	0	0	0	0	0	0	0	0	0	0	0	0	0	0
AL033529.1	0	0	0	0	0	0	0	0	0	0	0	0	0	0	0	0
ZBTB8B	0.17762	0.23753	0.284091	0	0.447761	0.640205	0.229885	0	0.347222	0.931966	0.393701	0	0.515464	0	0.638298	1.02881
ZBTB8A	0.414446	0.712589	1.94129	0	14.3284	4.60948	21.8391	0	0.694444	2.98229	30.315	0	1.03093	2.73973	0.638298	5.76132
ZBTB8OS	23.8011	24.9406	26.9413	5.81395	60.4478	41.6133	30.3448	29.5455	27.7778	39.329	61.811	12.5	24.4845	26.0274	27.8723	70.9877
RF00019-14	0	0	0	0	0	0	0	0	0	0	0	0	0	0	0	0
RBBP4	46.418	36.4608	32.5284	4.65116	92.3881	73.1114	75.6322	42.803	46.875	56.6636	96.4567	35.4167	14.9485	19.1781	48.2979	75.3086
SYNC	7.75607	7.83848	2.55682	2.32558	22.5373	13.3163	17.7011	1.13636	12.1528	11.2768	50.3937	9.375	0.773196	0	9.3617	10.9053
AC114489.1	0	0	0	0	0	0	0	0	0	0	0	0	0	0	0	0
KIAA1522	0.17762	0.118765	0.142045	0	13.7313	5.76184	5.97701	1.51515	0	2.23672	14.5669	0	0	0	0	0.617284
YARS	12.3742	19.8337	2.55682	17.4419	69.8507	45.8387	46.2069	11.7424	11.8056	24.9767	85.4331	6.25	0.515464	1.36986	24.8936	40.1235
S100PBP	17.5844	23.1591	17.2348	4.65116	50.8955	38.4123	40.6897	10.9848	22.2222	23.9515	64.1732	11.4583	10.567	17.8082	36.1702	30.6584
FNDC5	0.0592066	0.23753	0	0	0.149254	0.256082	0.229885	0	0.694444	0.27959	0	0	0	0	0.851064	0
HPCA	0	0	0	0	0	0	0	0	0	0	0	0	0	0	0	0.205761
TMEM54	0	0.23753	0	0	0	0	0	0	0.347222	0.55918	0	0	0	0	0	2.88066
RNF19B	5.56542	5.22565	23.7216	2.32558	11.3433	13.7004	7.81609	8.33333	4.51389	14.8183	15.748	5.20833	23.7113	36.9863	6.17021	3.29218
AL031602.1	0	0.118765	0	0	0.149254	0	0.45977	0	0	0.186393	0	0	0	0	0	0.205761
AL355864.1	0.0592066	0	0.094697	1.16279	0	0	0.229885	0	0	0.186393	0	0	0	0	0.212766	0
AL355864.2	0.0592066	0	0	0	0	0	0	0	0	0	0	0	0	0	0	0
AL020995.1	0	0	0.0473485	0	0.298507	0.256082	0.229885	0	0	0.0931966	0.787402	0	0	0	0.638298	0
AK2	21.3736	15.3207	15.8144	5.81395	78.0597	71.0627	56.092	29.9242	18.0556	37.0923	87.4016	17.7083	3.60825	2.73973	18.9362	42.5926
RF00017-3	0	0	0.284091	0	0.447761	1.40845	0	0	0	0.27959	0	0	0	0	0	0.205761
AZIN2	3.49319	2.019	0	0	0.149254	0.128041	1.14943	0	1.04167	0.55918	1.1811	2.08333	0	0	3.61702	0.823045
AL662907.1	0.35524	0	0.094697	1.16279	0	0	0.45977	0.378788	0	0.27959	0	0	0.257732	0	0.212766	0
TRIM62	5.03256	4.27553	1.08902	0	3.43284	3.71319	3.90805	2.65152	2.77778	3.82106	3.93701	1.04167	0.773196	0	4.04255	4.11523
AL662907.2	0.118413	0	0.142045	0	0.149254	0.512164	0.229885	0	0.347222	0.372787	0.787402	0	0.257732	0	0.425532	0
AL662907.3	0.0592066	0.356295	0	0	0.149254	0	0.45977	0	0.347222	0.27959	0	0	0	0	0	0
ZNF362	6.2167	5.34442	3.17235	0	26.5672	18.5659	28.046	8.33333	4.16667	15.0979	48.4252	3.125	1.28866	1.36986	5.10638	4.32099
AL513327.3	0	0	0.094697	0	0	0.128041	0	0	0	0.27959	0.393701	0	0	0	0	0
A3GALT2	0	0	0.0473485	0	0	0.128041	0	0	0	0.0931966	0	0	0.257732	0	0	0
AL513327.1	0.414446	0.356295	0.61553	0	0.597015	0.512164	0.45977	0	0.347222	1.58434	1.1811	0	4.12371	1.36986	0.212766	0.411523
PHC2	13.3807	11.9952	61.7424	2.32558	54.6269	66.1972	35.6322	48.8636	7.98611	60.2982	58.6614	2.08333	79.6392	84.9315	11.9149	9.0535
MIR3605	0	0	0.142045	0	0	0	0	0	0	0.186393	0	0	0	0	0	0
RN7SKP16	0.296033	0	4.54545	0	1.19403	2.43278	0.229885	0.378788	0.347222	3.72787	2.3622	0	9.53608	12.3288	0.212766	0.205761
AL513327.2	0	0	0.094697	0	0.895522	0	0.229885	0	0	0.0931966	1.9685	0	0	0	0	0
TLR12P	0	0	0	0	0	0	0	0	0	0	0	0	0	0	0	0
ZSCAN20	0.947306	0.712589	0.094697	1.16279	3.43284	2.56082	1.83908	1.51515	0.347222	1.67754	2.75591	1.04167	0	0	0.425532	0.823045
AC115285.1	0	0	0	0	0	0	0	0	0	0	0	0	0	0	0	0
CSMD2	0.236827	0	0.473485	0	0.298507	0.640205	0.45977	0	0	0.465983	1.5748	0	0	0	0.212766	0.411523
HSPD1P14	0	0	0	0	0	0	0	0	0	0	0	0	0	0	0	0
HMGB4	0	0	0	0	0	0	0	0	0	0	0	0	0	0	0	0
CSMD2-AS1	0	0	0	0	0	0	0	0	0	0	0	0	0	0	0	0
RNA5SP42	0	0	0	0	0	0	0	0	0	0	0	0	0	0	0	0
C1orf94	0	0	0	0	0	0	0	0	0	0	0	0	0	0	0	0
AC115286.1	0	0	0	0	0	0	0	0	0	0	0	0	0	0	0	0
MIR552	0	0	0	0	0	0	0	0	0	0	0	0	0	0	0	0
SMIM12	18.8277	19.0024	16.8087	4.65116	64.0299	47.2471	37.0115	28.0303	22.2222	34.0168	72.4409	11.4583	7.47423	8.21918	23.617	30.2469
GJB5	0	0	0	0	0	0	0	0	0	0	0	0	0	0	0	0
GJB4	0.118413	0.118765	0.426136	0	0.597015	0.384123	0.45977	0	1.04167	0.55918	1.1811	0	0.515464	0	0	0
AL121988.1	0	0	0	0	0	0	0	0	0	0	0.393701	0	0	0	0	0
GJB3	0	0	0	0	0	0	0	0	0	0	0	0	0	0	0	0
GJA4	0.0592066	0	0.094697	0	12.6866	0	4.5977	0	0	0.372787	42.9134	0	0	0	0	0.205761
AL122010.1	0	0	0	0	0	0	0	0	0	0	0.787402	0	0	0	0	0
DLGAP3	1.24334	1.18765	0.189394	0	1.64179	4.48143	3.21839	4.92424	2.08333	4.93942	1.9685	3.125	0	0	1.2766	4.32099
AC114490.3	1.36175	0.831354	0.378788	0	2.23881	1.40845	3.21839	0	1.38889	0.55918	3.54331	1.04167	0	0	1.06383	0.205761
AC114490.1	0	0	0	0	0	0	0	0	0	0.0931966	0	0	0	0	0	0
AC114490.2	2.60509	2.25653	0.94697	0	2.98507	1.92061	3.21839	0	1.38889	1.86393	0.787402	1.04167	0	0	0.851064	3.29218
TMEM35B	16.9331	13.658	0.284091	0	28.3582	5.76184	21.8391	15.5303	7.29167	4.19385	1.5748	5.20833	0	0	10.6383	11.3169
ZMYM6	9.29544	7.71971	11.411	6.97674	20.8955	30.4738	22.7586	12.1212	9.72222	24.3243	35.8268	16.6667	3.60825	4.10959	9.57447	17.0782
ZMYM1	7.9929	7.48219	4.02462	2.32558	26.5672	17.9257	22.5287	4.16667	6.94444	8.85368	37.4016	5.20833	1.03093	1.36986	8.29787	4.52675
RPL12P45	0	0	0	0	0	0	0	0	0	0	0	0	0	0	0	0
EFCAB14P1	0	0	0	0	0	0	0	0	0	0	0	0	0	0	0	0
AL590434.1	0.0592066	0	0	0	0	0.128041	0	0	0	0	0	0	0	0	0	0
SFPQ	72.7649	61.8765	66.714	39.5349	90.7463	87.452	85.2874	50	69.7917	75.6757	96.4567	54.1667	47.9381	50.6849	64.0426	65.4321
RF00019-15	0	0	0	0	0	0	0	0	0	0	0	0	0	0	0	0
ZMYM4	13.6175	8.90736	13.4943	2.32558	46.7164	51.7286	43.2184	13.2576	16.3194	38.397	74.0157	13.5417	2.06186	4.10959	14.8936	19.3416
RN7SL503P	0	0.118765	0	0	0	0	0	0	0	0.186393	0	0	0	0	0	0
RF00091	0	0	0	0	0.298507	0.256082	0	0	0	0.186393	0.393701	0	0	0	0.212766	0
RPL5P4	1.59858	0.950119	0.710227	0	17.3134	7.17029	10.8046	1.13636	2.43056	5.5918	32.2835	2.08333	0.257732	0	1.70213	8.02469
ZMYM4-AS1	2.30906	1.66271	0	0	7.01493	1.28041	5.05747	2.65152	0.694444	1.11836	0.393701	2.08333	0	0	1.2766	2.26337
RF00017-4	0.118413	0.118765	0	0	0	0.128041	0	0	0	0	0.393701	0	0	0	0	0
KIAA0319L	18.2356	12.2328	63.8258	3.48837	35.6716	45.4545	27.8161	23.1061	11.1111	40.5405	55.5118	11.4583	43.0412	49.3151	13.4043	29.6296
AC004865.1	0.35524	0.23753	0.331439	0	0.447761	0.128041	0	0	0	0.186393	1.5748	0	0	0	0.212766	0.205761
NCDN	5.3878	4.15677	0.994318	0	18.3582	13.4443	11.4943	3.0303	2.77778	6.89655	24.8031	2.08333	0	2.73973	1.2766	10.6996
AC004865.2	4.08526	7.60095	1.37311	0	3.28358	11.7798	13.3333	4.16667	1.04167	5.77819	12.5984	2.08333	0.257732	0	10.8511	4.73251
TFAP2E	0.71048	0.593824	0.426136	0	0.597015	1.15237	2.29885	1.13636	0.347222	1.77074	1.5748	0	0	0	1.48936	0.205761
PSMB2	31.9716	32.1853	14.6307	11.6279	83.8806	77.7209	58.6207	54.5455	30.5556	57.4091	91.7323	18.75	3.35052	4.10959	36.383	63.786
C1orf216	4.14446	4.86936	0.189394	0	17.0149	9.47503	15.8621	3.0303	2.43056	2.98229	28.7402	0	0.257732	1.36986	2.55319	5.14403
CLSPN	1.71699	1.30641	4.11932	2.32558	63.2836	61.3316	14.2529	2.65152	0.694444	7.54893	52.3622	0	0.257732	1.36986	5.10638	9.46502
AL354864.1	0	0	0	0	0.298507	0.128041	0	0	0	0	0	0	0	0	0.212766	0
AGO4	11.4861	11.639	65.5303	3.48837	19.2537	52.3688	24.5977	20.4545	7.63889	44.548	37.0079	8.33333	64.1753	64.3836	16.1702	7.20165
AGO1	10.7164	6.4133	12.2159	1.16279	19.403	41.6133	28.046	12.1212	10.4167	29.2637	61.0236	5.20833	17.5258	9.58904	9.57447	12.1399
AL139286.1	0	0	0	0	0	0	0	0	0	0	0	0	0.257732	0	0	0
AL139286.2	0.17762	0.118765	0.284091	0	0.447761	0.640205	0.689655	0	0.347222	0.465983	1.1811	0	0.257732	0	0.425532	0
AGO3	23.3274	20.9026	30.6818	1.16279	45.8209	48.0154	39.5402	17.4242	22.9167	36.8127	72.0472	16.6667	11.3402	17.8082	25.7447	22.2222
AL138787.2	0.118413	0	0	0	0	0	0	0	0	0	0	0	0	0	0	0.205761
AL138787.1	0	0	0	0	0	0.128041	0	0	0	0	0	0	0	0	0	0
TEKT2	0	0	0	0	0.149254	0	0	0	0	0	0	0	0.257732	0	0	0.205761
ADPRHL2	12.1374	10.6888	2.84091	2.32558	39.5522	26.1204	27.5862	10.6061	9.02778	13.2339	42.9134	11.4583	4.38144	5.47945	10.8511	18.93
COL8A2	0.118413	0	0	0	0.149254	7.93854	0.229885	2.27273	0	5.12582	0.393701	0	0	0	0	0.205761
TRAPPC3	22.9722	19.2399	13.447	19.7674	65.3731	48.6556	46.6667	33.7121	23.6111	36.3467	73.2283	17.7083	7.98969	10.9589	19.7872	56.5844
MAP7D1	38.3659	31.4727	18.6553	2.32558	36.5672	45.7106	38.8506	32.5758	11.8056	37.4651	49.6063	7.29167	40.4639	35.6164	36.383	18.3128
RN7SL131P	0	0	0	0	0	0	0	0	0	0	0	0	0	0	0	0
THRAP3	56.6015	54.8694	40.6723	32.5581	88.0597	78.6172	77.931	44.3182	51.7361	61.5098	94.0945	58.3333	52.8351	50.6849	60.8511	65.8436
UBE2V2P4	0.118413	0	0.0473485	0	0	0	0.229885	0	0	0.0931966	0.393701	0	0	0	0	0
SH3D21	1.06572	0.831354	0.804924	1.16279	2.38806	5.12164	15.4023	1.13636	2.43056	0.931966	11.811	0	0.257732	0	1.48936	6.58436
EVA1B	8.40734	9.14489	5.49242	1.16279	10.8955	20.3585	50.5747	8.71212	2.08333	15.8434	51.5748	0	0.773196	1.36986	13.4043	17.0782
AL591845.1	0.17762	0.23753	0.284091	0	0.447761	1.66453	4.5977	0	0	0.931966	6.69291	0	0.257732	0	0	0.411523
STK40	9.23623	10.095	26.8466	8.13953	21.3433	15.3649	18.1609	14.0152	9.72222	18.4529	32.6772	10.4167	26.8041	32.8767	11.0638	19.5473
LSM10	29.3073	24.3468	16.2879	13.9535	54.1791	40.9731	37.2414	35.2273	45.8333	36.5331	65.748	33.3333	17.0103	19.1781	23.8298	66.4609
RNU4-27P	0	0	0	0	0	0	0	0	0	0	0	0	0	0	0	0
OSCP1	0.118413	0.23753	0.142045	0	4.02985	1.02433	4.13793	0.757576	0	0.652377	4.72441	0	0	0	0.851064	2.46914
SNORA63C	0	0	0	0	0	0	0	0	0	0.0931966	0	0	0	0	0	0
MRPS15	29.5441	19.715	7.10227	9.30233	79.5522	61.4597	54.2529	32.197	26.3889	40.3541	89.3701	6.25	1.54639	2.73973	21.2766	57.4074
CSF3R	4.85494	3.20665	96.0701	5.81395	7.46269	72.2151	61.3793	50.3788	6.25	65.7968	23.622	4.16667	99.7423	100	4.46809	7.61317
FTLP18	0	0	0	0	0	0	0	0	0	0	0	0	0	0	0	0
AL596257.1	0	0	0	0	0	0	0	0	0	0	0	0	0	0	0	0
AC117945.2	0	0	0	0	0	0	0	0	0	0	0	0	0	0	0	0
AC117945.1	0	0	0	0	0	0	0	0	0	0	0	0	0	0	0	0
GRIK3	0	0	0	0	0	0	0	0	0.347222	0	0	0	0	0	0	0
AL031430.1	0	0	0	0	0	0	0	0	0	0	0	0	0	0	0	0
MIR4255	0	0	0	0	0	0	0	0	0	0	0	0	0	0	0	0
RNU6-636P	0	0	0	0	0	0	0	0	0	0	0	0	0	0	0	0
AL353604.1	0	0	0	0	0	0	0	0	0	0	0	0	0	0	0	0
RNA5SP43	0	0	0	0	0	0	0	0	0	0	0	0	0	0	0	0
RPS29P6	0	0	0	0	0	0	0	0	0	0	0	0	0	0	0	0
LINC01137	6.03908	4.51306	0.568182	0	1.79104	4.48143	10.5747	1.13636	0	2.14352	2.3622	0	0.773196	0	6.38298	5.96708
ZC3H12A	7.57845	7.48219	24.1004	0	4.62687	16.7734	5.05747	4.54545	9.72222	7.82852	14.1732	3.125	17.268	26.0274	6.38298	13.9918
MIR6732	0	0	0	0	0	0	0	0	0	0	0	0	0	0	0	0
MEAF6	42.4512	39.6675	16.6667	4.65116	77.1642	50.9603	66.8966	26.8939	43.75	41.9385	82.2835	29.1667	4.12371	6.84932	41.4894	37.4486
MIR5581	0	0	0	0	0	0	0	0	0	0	0	0	0	0	0	0
SNIP1	13.0255	9.85748	11.6951	5.81395	39.2537	25.9923	17.2414	9.4697	11.4583	14.6319	51.9685	12.5	8.76289	10.9589	11.0638	18.93
FTH1P1	0.118413	0.118765	0.142045	0	0.298507	0	0	0	0	0.372787	0.787402	1.04167	0.515464	0	0.638298	0
AL034379.1	0.236827	0.118765	0	0	0.298507	0.384123	0	0	0	0.27959	0.787402	0	0	0	0.425532	0
DNALI1	0	0	0	0	2.53731	0.128041	0	0	0	0.55918	0.393701	0	0	0	0	0.205761
GNL2	14.2096	10.095	6.67614	3.48837	66.7164	38.2843	32.6437	12.8788	13.8889	24.6039	72.4409	13.5417	0.257732	2.73973	11.2766	31.07
AL513220.1	0.236827	0.23753	0	0	0	0.128041	0	0	0	0.27959	0	0	0	0	0.425532	0
RSPO1	0	0	0	0	0.149254	0	0	0	0	1.02516	0	0	0	0	0	0
C1orf109	7.81528	4.86936	0.994318	11.6279	48.5075	18.822	16.092	4.92424	10.4167	7.54893	54.3307	8.33333	0.515464	0	5.74468	14.6091
CDCA8	1.24334	0.475059	3.125	1.16279	47.0149	36.2356	8.27586	1.51515	0.694444	2.23672	35.0394	0	1.54639	1.36986	7.44681	5.96708
EPHA10	0	0	0.0473485	0	0	0	0	0	0	0.0931966	0.393701	0	0	0	0	1.23457
RF00019-16	0	0	0	0	0	0	0	0	0	0	0	0	0	0	0	0
ACTN4P2	0	0	0	0	0	0	0	0	0	0	0	0	0	0	0	0
AL929472.1	0	0	0	0	0	0	0	0	0	0	0	0	0	0	0	0
MANEAL	1.24334	2.019	0.0473485	0	1.04478	0.384123	1.14943	0	2.08333	0.0931966	2.75591	1.04167	0.257732	0	1.06383	8.84774
AL929472.3	0.118413	0	0	0	0	0	0	0	0	0	0	0	0	0	0	0.823045
YRDC	9.05861	7.36342	9.94318	3.48837	44.0299	23.1754	16.7816	5.68182	10.4167	10.7176	51.5748	2.08333	5.15464	2.73973	7.44681	16.4609
C1orf122	16.045	15.9145	9.51705	6.97674	41.791	37.388	28.7356	18.1818	16.6667	29.9161	55.9055	10.4167	9.27835	8.21918	18.0851	56.5844
MTF1	8.11131	6.29454	45.7386	3.48837	26.4179	35.5954	11.0345	14.0152	11.1111	24.4175	27.9528	3.125	46.6495	58.9041	5.53191	14.8148
AL929472.4	0	0	0.142045	0	0	0.128041	0	0	0	0	0	0	0	0	0	0
AL929472.2	0.17762	0.118765	0.236742	0	0.447761	0.896287	0.689655	0	0.694444	0.931966	1.1811	0	0.257732	0	0	0.205761
INPP5B	10.9532	9.85748	9.2803	4.65116	31.194	24.0717	31.7241	2.65152	15.2778	14.9115	52.7559	8.33333	3.09278	5.47945	14.8936	16.8724
RF00092	0	0	0	0	0	0	0	0	0	0	0	0	0	0	0	0
RNU6-584P	0	0	0	0	0	0	0	0	0	0	0	0	0	0	0	0
RF00017-5	0	0	0.0473485	0	0	0	0	0	0	0	0	0	0	0	0	0
SF3A3	29.8401	24.9406	14.9621	3.48837	77.7612	60.4353	57.4713	20.4545	23.6111	32.4324	88.189	21.875	8.24742	6.84932	22.9787	39.0947
RNU6-510P	0	0	0.0473485	0	0	0	0	0	0	0	0	0	0	0	0	0
FHL3	5.15098	7.48219	11.8371	0	29.5522	17.9257	31.4943	15.5303	1.04167	19.4781	46.4567	0	10.3093	10.9589	19.1489	4.73251
UTP11	10.0651	10.3325	9.13826	1.16279	64.6269	48.5275	41.3793	18.1818	8.33333	30.3821	79.1339	7.29167	3.09278	2.73973	14.4681	36.214
POU3F1	0.651273	0.831354	0	0	0	0	0.229885	0	0.694444	0	0.393701	1.04167	0	0	0.212766	0.411523
AL139158.2	0	0	0	0	0	0	0	0	0	0	0	0	0	0	0	0.205761
AL139158.1	0	0	0	0	0	0	0	0	0	0	0	0	0	0	0	0
MIR3659	0	0	0	0	0	0	0	0	0	0	0	0	0	0	0	0
AL139158.3	0	0	0	0	0	0	0	0	0	0	0	0	0	0	0	0
LINC01343	0	0	0	0	0	0	0	0	0	0	0	0	0	0	0	0
AL513479.1	0	0	0.189394	0	0	0	0	0	0	0	0	0	0	0	0	0
RNU6-753P	0	0	0	0	0	0	0	0	0	0	0	0	0	0	0	0
LINC01685	0	0	0.331439	0	0	0.128041	0.229885	0	4.16667	0.0931966	0	4.16667	0	0	0	1.23457
AL354702.1	0.0592066	0	0	0	0	0.256082	0	0	0	0	0	0	0	0	0	0.617284
AL354702.2	0	0	0	0	0	0	0	0	0	0	0	0	0	0	0	0.205761
RRAGC	10.7756	7.83848	23.4848	1.16279	26.8657	32.1383	17.2414	13.6364	11.4583	18.7325	29.1339	9.375	13.9175	19.1781	7.23404	11.7284
AL139260.2	0	0	0	0	0	0	0	0	0	0	0	0	0	0	0	0
AL139260.1	1.36175	1.30641	0.236742	0	2.83582	1.28041	5.28736	1.89394	2.08333	1.86393	4.72441	2.08333	0.257732	1.36986	0.851064	0.823045
MYCBP	12.8478	9.85748	30.3504	2.32558	54.6269	46.6069	22.069	16.2879	6.94444	22.274	53.5433	6.25	9.79381	20.5479	7.87234	30.2469
AL139260.3	0.118413	0	0	0	0	0	0.229885	0	0	0.0931966	0	0	0	0	0	0
GJA9	0	0	0	0	0	0	0	0	0	0	0	0	0	0	0	0
RHBDL2	0.296033	0	0.0473485	0	0.746269	0.128041	0	0	0	0.186393	1.1811	0	0	0	0.212766	0
RNU6-605P	0	0	0	0	0	0	0	0	0	0	0	0	0	0	0	0
RF00019-17	0	0	0	0	0	0	0	0	0	0	0	0	0	0	0	0
EIF1P2	0	0	0	0	0	0	0	0	0	0	0	0	0	0	0	0
AKIRIN1	39.6684	26.0095	35.6534	23.2558	57.4627	41.1012	39.3103	17.803	28.8194	32.8052	75.1969	22.9167	36.0825	45.2055	23.1915	34.1564
NDUFS5	67.2587	54.5131	36.3163	12.7907	91.9403	92.8297	86.2069	83.7121	44.7917	81.2675	97.6378	29.1667	20.3608	24.6575	42.3404	86.214
MACF1	57.9633	56.4133	42.5189	3.48837	64.9254	68.3739	75.1724	31.0606	41.3194	63.2805	88.5827	40.625	18.5567	28.7671	72.3404	33.9506
RNU6-608P	0	0	0	0	0.149254	0	0	0	0	0	0	0	0	0	0	0
RNA5SP44	0	0	0	0	0	0	0	0	0	0	0	0	0	0	0	0
AL356055.1	0.118413	0.712589	0	0	0.298507	0.896287	2.52874	0	0	0.372787	6.69291	0	0	0	0.851064	0.205761
AL442071.1	0.0592066	0.118765	0	0	0	0	0	0	0	0	0.393701	0	0	0	0	0
HSPE1P8	0	0	0.0473485	0	0.149254	0.128041	0	0	0.347222	0.0931966	0	0	0	0	0	0
BMP8A	0.296033	0.118765	0.189394	0	0.447761	0.512164	0.45977	0	0.347222	0.27959	1.9685	2.08333	0	0	0.212766	6.17284
OXCT2P1	0	0	0	0	0	0.256082	0	0	0	0	0	0	0	0	0	0.823045
PPIEL	2.24985	2.019	0.520833	0	3.28358	2.8169	2.52874	4.54545	1.04167	5.87139	8.66142	0	0	0	1.2766	3.90947
PABPC4	40.5565	20.7838	18.5606	11.6279	83.8806	69.0141	54.7126	46.9697	42.0139	62.069	94.8819	23.9583	2.06186	2.73973	18.0851	69.3416
PABPC4-AS1	0.296033	0.23753	0	0	1.79104	0.128041	0.45977	0	1.04167	0.186393	0.393701	0	0	0	0.212766	0.823045
SNORA55	0	0	0	0	0.149254	0.128041	0.229885	0	0	0.27959	0.787402	0	0	0	0	0
HEYL	0	0	0	0	1.79104	0.896287	1.83908	0.757576	0	0.372787	3.93701	0	0	0	0	0.617284
AL035404.2	0	0	0	0	0	0	0	0	0	0	0	0	0	0	0	0
NT5C1A	0	0	0	0	0	0	0	0	0	0	0	0	0	0	0	0
HPCAL4	3.5524	0.593824	0	0	0	0.128041	0	0	0	0	0	0	0	0	0	0
PPIE	21.6104	21.1401	4.64015	1.16279	66.1194	42.3816	40.2299	12.8788	17.7083	20.1305	71.2598	22.9167	0	0	24.6809	33.3333
AL035404.1	0.118413	0	0	0	0	0	0	0	0	0	0	0	0	0	0	0
RNU7-121P	0	0	0	0	0	0	0	0	0	0	0	0	0	0	0	0
BMP8B	0.473653	1.42518	1.5625	0	4.1791	8.57875	0	0.378788	1.38889	1.30475	9.44882	1.04167	0.773196	0	0.851064	24.6914
OXCT2	0.118413	0.118765	0.142045	0	1.19403	1.02433	0.45977	0	0.347222	0.0931966	0.787402	0	0	0	0	7.81893
AL033527.6	0	0	0	0	0.149254	0	0	0	0	0.0931966	0	0	0	0	0	0.205761
AL033527.3	0.35524	0.950119	0.142045	0	1.34328	0.512164	0	0.757576	0.347222	0.27959	0.787402	0	0	0	1.2766	3.29218
AL033527.1	0	0	0	0	0	0	0	0	0	0	0	0	0	0	0	0
AL033527.5	0.71048	0.23753	3.2197	0	3.43284	5.37772	0.91954	0.378788	0.694444	1.58434	5.90551	0	1.03093	0	0	5.55556
AL033527.4	0	0	0.0473485	0	0	0.128041	0	0	0.347222	0	0	0	0	0	0	0
TRIT1	6.2759	4.86936	0.662879	0	35.6716	16.1332	17.2414	4.54545	5.55556	8.48089	42.5197	7.29167	0	0	3.40426	7.20165
RF00019-18	0.118413	0	0	0	0.149254	0	0.229885	0	0	0.186393	0.787402	0	0	0	0	0.205761
MYCL	0	0	0.094697	0	0.746269	11.2676	0.91954	3.0303	0	7.08295	0.787402	0	0	0	0	0.823045
AL033527.2	0	0	0	0	0.149254	0.128041	0	0	0	0.0931966	0	0	0	0	0	0
RF00019-19	0	0	0	0	0	0	0	0	0	0	0	0	0	0	0	0
MFSD2A	0.236827	0.23753	0.426136	0	4.1791	14.7247	2.29885	6.43939	1.04167	5.21901	11.4173	0	0	0	0.425532	12.1399
AL663070.1	0.0592066	0	0	0	0.149254	0.896287	0.229885	0	0	0.465983	0	0	0	0	0	0.205761
CAP1	74.1267	67.696	98.5795	10.4651	72.2388	92.7017	78.8506	84.4697	66.3194	84.343	89.7638	54.1667	100	100	74.0426	60.0823
PPT1	31.9716	20.4276	29.4981	2.32558	70.1493	81.5621	67.8161	59.4697	28.125	70.7363	78.7402	14.5833	45.6186	39.726	14.2553	31.6872
AL512599.1	0	0	0.0473485	0	0	0.128041	0	0	0	0	0	0	0	0	0	0
RLF	19.4198	16.2708	26.9413	15.1163	43.7313	28.9373	28.046	8.33333	21.875	24.6039	59.4488	12.5	24.4845	27.3973	17.6596	17.6955
RNU6-1237P	0.118413	0.118765	3.45644	0	0.298507	1.92061	0	0.378788	0.347222	1.49115	1.9685	1.04167	2.83505	1.36986	0.425532	0.205761
TMCO2	0	0	0.0473485	0	0	0	0	0	0	0	0	0	0	0	0	0
AL050341.2	3.73002	3.56295	1.79924	0	16.7164	9.85915	14.4828	1.89394	2.77778	5.5918	22.4409	5.20833	0.515464	0	2.34043	4.73251
ZMPSTE24	12.4334	12.114	18.2765	3.48837	47.3134	39.5647	24.3678	9.4697	7.29167	31.3141	49.2126	9.375	23.7113	21.9178	11.9149	31.4815
AL050341.1	0.118413	0	0	0	0.149254	0.128041	0.45977	0	0	0.0931966	0	0	0	0	0.638298	0
COL9A2	4.79574	1.06888	1.37311	1.16279	1.79104	8.96287	6.2069	2.65152	10.7639	2.98229	6.29921	12.5	2.31959	1.36986	0.212766	17.4897
AL031985.2	0.0592066	0	0.094697	0	0.298507	0.384123	0	0	0	0.0931966	0.393701	0	0	0	0.212766	0.205761
SMAP2	83.8958	74.228	78.4564	9.30233	60.2985	74.5198	66.4368	79.9242	89.2361	81.2675	82.6772	91.6667	97.9381	95.8904	80	81.893
AL031985.1	0.0592066	0	0	0	0	0.896287	0	0.378788	1.73611	3.35508	0	1.04167	0	0	0	0.205761
AL031985.4	0.17762	0.23753	0	0	0.149254	0	0	0	0.347222	0	0.393701	0	0	0	0.212766	0.205761
ZFP69B	1.24334	0.475059	0.426136	0	6.26866	2.04866	1.83908	0.378788	0.347222	1.11836	6.69291	0	0.773196	1.36986	0.638298	5.55556
AL031985.3	0.118413	0.118765	0.284091	0	1.19403	1.40845	0.229885	0	0.694444	0.652377	3.54331	0	0	0	0.212766	2.88066
AL603839.4	0	0	0.094697	0	0	0.256082	0	0	0	0	0	0	0	0	0	0
ZFP69	2.72351	1.66271	0.236742	2.32558	12.3881	5.12164	6.2069	1.89394	1.38889	2.60951	13.3858	1.04167	0	0	3.19149	3.08642
AL603839.3	0.414446	0.356295	0.236742	0	2.23881	1.53649	1.6092	1.13636	0	0.83877	4.72441	0	0	0	0.638298	0.205761
EXO5	2.54589	2.96912	0.852273	0	18.806	11.0115	4.5977	3.40909	2.08333	3.26188	21.2598	5.20833	1.28866	0	3.19149	2.6749
AL603839.1	0.0592066	0.118765	0	0	0.149254	0	0	0.378788	0	0	0.393701	1.04167	0	0	0.212766	0.205761
AL603839.2	0.0592066	0	0	0	0.298507	0	0	0	0	0.0931966	0.393701	0	0	0	0	0
ZNF684	1.7762	2.85036	0.899621	0	14.6269	16.0051	6.66667	3.40909	2.43056	6.15098	19.685	2.08333	0.257732	0	4.04255	5.34979
AL356379.1	0	0	0	0	0	0	0	0	0	0	0	0	0	0	0	0
GTF2F2P2	0	0	0	0	0	0	0	0	0	0	0	0	0	0	0	0
RIMS3	0.592066	0.356295	0	0	6.1194	0.512164	1.14943	0	0	0.27959	3.54331	0	0	0	0	0
AL031289.1	0	0	0	0	0	0	0	0	0	0	0	0	0	0	0	0
NFYC-AS1	3.13795	4.27553	3.125	1.16279	8.65672	8.4507	6.2069	2.65152	4.86111	4.47344	19.685	1.04167	1.03093	1.36986	4.04255	3.7037
NFYC	20.071	15.9145	21.6383	4.65116	50.7463	39.4366	36.3218	25.3788	18.4028	31.9664	54.3307	10.4167	22.4227	23.2877	18.9362	30.2469
MIR30E	0	0	0	0	0	0	0	0	0	0	0	0	0	0	0	0
MIR30C1	0	0	0	0	0	0	0	0	0	0	0	0	0	0	0	0
KCNQ4	0.118413	0	0	0	4.02985	0	0.45977	0	0.347222	0	1.9685	0	0	0	0	0
RN7SL326P	0	0	0	0	0.149254	0	0	0	0	0	0	0	0	0	0	0
CITED4	11.1308	2.96912	34.375	1.16279	8.65672	65.4289	14.4828	10.2273	2.43056	25.6291	14.9606	1.04167	9.27835	9.58904	2.34043	3.29218
AC119677.1	0	0	0	0	0	0	0	0	0	0	0	0	0	0	0	0
AL391730.1	0	0	0	0	0	0.128041	0	0	0	0.186393	0	0	0	0	0	0
UBE2V1P8	0	0	0	0	0	0	0	0	0	0	0	0	0	0	0	0
CTPS1	8.9402	6.05701	0.710227	3.48837	54.1791	34.1869	20.2299	2.65152	9.72222	11.1836	62.5984	3.125	0	0	9.14894	11.9342
SLFNL1-AS1	0.236827	0.23753	0.0473485	0	1.34328	1.66453	0.689655	0	1.04167	0.27959	2.75591	0	0.257732	0	0	0.411523
SLFNL1	0.118413	0.118765	0	0	0	0.640205	0	0	0	0.186393	0.393701	0	0	0	0	0.411523
SCMH1	7.28242	5.70071	0.852273	0	29.8507	23.3035	29.8851	4.54545	9.375	6.52377	22.8346	8.33333	0.515464	0	5.31915	16.8724
RPL23AP17	0.0592066	0	0	0	0	0	0	0	0	0	0	0	0	0	0	0
AC093151.3	0	0	0	0	0.298507	0.256082	0	0	0	0.0931966	0.393701	0	0	0	0	0
AC093151.1	0	0	0	0	0	0.128041	0	0	0	0	0	0	0	0	0	0
FOXO6	0	0	0.0473485	0	0	0.128041	0.229885	0.378788	0	0	0	0	0	0	0	0.411523
AC093151.2	0	0	0	0	0	0	0	0	0	0	0	0	0	0	0	0
RNA5SP45	0	0	0	0	0	0	0	0	0	0	0	0	0	0	0	0
EDN2	0	0	0	0	0	0	0	0	0	0	0	0	0	0	0	0
HIVEP3	8.70337	10.6888	0.236742	0	3.58209	7.8105	18.3908	1.89394	5.20833	5.40541	6.69291	1.04167	0.257732	0	11.9149	0.411523
AL445933.2	0	0	0	0	0	0	0	0	0	0	0	0	0	0	0	0
AL445933.1	0.0592066	0	0	1.16279	0	0	0.229885	0	0	0.27959	0.393701	0	0	0	0	0
AC119676.1	0	0	0	0	0	0	0	0	0	0	0	0	0	0	0	0
HNRNPFP1	0	0	0	0	0	0	0	0	0	0	0	0	0	0	0	0
AC114492.1	0	0	0	0	0	0	0	0	0	0	0	0	0	0	0	0
GUCA2B	0	0	0	0	0	0	0	0	0	0	0	0	0	0	0	0
GUCA2A	0	0	0	0	0	0	0	0	0	0	0	0	0	0	0	0
FOXJ3	31.6163	26.9596	16.0038	11.6279	47.1642	35.8515	41.6092	15.5303	22.5694	25.7223	61.811	11.4583	11.0825	13.6986	28.2979	27.3663
AC096540.1	0	0	0	0	0	0	0	0	0	0	0	0	0	0	0	0
RIMKLA	0.0592066	0.23753	0.094697	0	0.597015	0.256082	3.67816	0.378788	0	0	1.9685	0	0.257732	0	0.212766	2.6749
AL513331.1	0	0	0	0	0	0	0	0	0	0	0.393701	0	0	0	0	0.205761
ZMYND12	0.947306	0.356295	0.0473485	0	2.23881	1.28041	2.75862	0.378788	1.04167	0.465983	6.29921	0	0	0	0.212766	2.26337
PPCS	35.3464	30.285	27.0833	3.48837	67.7612	54.6735	62.7586	37.8788	35.4167	49.4874	79.5276	38.5417	15.9794	21.9178	30.4255	54.5267
CCDC30	3.90764	3.08789	3.50379	0	7.61194	4.48143	8.73563	0.378788	5.90278	3.44828	17.7165	0	3.86598	4.10959	4.68085	2.26337
AL445669.1	0	0.118765	0.094697	0	0.149254	0	0	0	0	0.0931966	0.393701	1.04167	0.257732	0	0	0
TMSB4XP1	0.236827	0	0	0	0.298507	0	0.229885	0	0.347222	0	0	0	0	0	0	0.205761
RNU6-536P	0	0	0.0473485	0	0	0.128041	0	0	0	0	0	0	0	0	0	0
AL445669.2	0	0	0.284091	0	0	0.128041	0.45977	0	0	0.186393	0.393701	0	0.773196	0	0	0
PPIH	23.5642	21.2589	1.94129	0	77.7612	53.5211	45.5172	17.803	21.1806	19.9441	73.622	16.6667	0.773196	2.73973	17.0213	25.9259
AC098484.4	0.473653	0	0	0	2.83582	0.896287	0.91954	0.378788	0.694444	0.27959	3.93701	0	0	0	0.638298	0.823045
AC098484.2	0.0592066	0	0	0	1.04478	0.768246	0.689655	0.378788	0	0.27959	1.5748	0	0	0	0	0.205761
YBX1	91.7703	80.8789	34.8485	90.6977	99.7015	98.0794	97.7011	96.5909	94.0972	90.9599	99.6063	94.7917	20.1031	23.2877	78.7234	89.7119
CLDN19	0.118413	0	0	0	0	0.128041	0	0	0	0	0.393701	0	0.257732	0	0	0
P3H1	10.0651	9.38242	2.93561	0	42.8358	35.2113	31.7241	12.5	8.68056	15.9366	47.6378	4.16667	0.773196	1.36986	6.38298	18.3128
C1orf50	5.26939	3.91924	1.18371	1.16279	19.8507	6.40205	8.96552	4.54545	4.16667	4.00746	10.6299	1.04167	0.773196	0	4.68085	7.61317
AC098484.3	2.90112	2.3753	0.142045	0	6.1194	1.02433	2.75862	3.40909	0.694444	0.652377	0.393701	2.08333	0	0	1.70213	3.08642
AC098484.1	0.0592066	0.118765	0	0	0.149254	0	0	0	0.347222	0	0	0	0	0	0	0
TMEM269	0.0592066	0	0	0	0.298507	0.128041	0.229885	0	0	0.0931966	0.393701	0	0.257732	0	0	0.411523
SVBP	16.4594	10.5701	21.1174	36.0465	66.4179	48.6556	41.1494	29.5455	16.3194	34.0168	71.6535	8.33333	20.6186	26.0274	11.9149	20.9877
ERMAP	1.53937	1.42518	4.40341	65.1163	57.4627	14.4686	13.7931	6.81818	1.38889	10.9972	38.189	2.08333	2.31959	5.47945	2.76596	4.32099
AL512353.1	0.17762	0.23753	0	3.48837	2.83582	0.896287	2.06897	0	0.347222	0.27959	4.72441	0	0	0	0.212766	0.617284
ZNF691	3.13795	4.038	1.04167	0	18.5075	5.76184	17.2414	4.16667	4.16667	3.07549	25.9843	3.125	0	1.36986	2.55319	8.23045
AL512353.2	0.0592066	0	0	0	0	0	0	0	0	0	0	0	0	0	0	0
AL512353.3	0	0	0	0	0	0	0	0	0	0	0	0	0	0	0	0
ATP6V1E1P1	0	0	0	0	0	0	0	0	0	0	0	0	0	0	0	0
SLC2A1	10.0059	8.31354	2.27273	96.5116	64.3284	9.60307	16.092	1.13636	11.8056	3.44828	55.1181	8.33333	7.21649	6.84932	12.3404	9.67078
ATP6V0CP4	0.0592066	0.118765	0	5.81395	0.746269	0	0.229885	0	0	0	0.393701	0	0	0	0.212766	0
SLC2A1-AS1	0.71048	0.23753	0.0473485	5.81395	5.97015	0.256082	1.14943	0	0.694444	0.27959	0.787402	3.125	0.257732	0	0.212766	0.823045
AC099795.1	0	0	0	1.16279	0	0	0	0	0	0	0	0	0	0	0	0
RNU6-880P	0	0	0	0	0	0	0	0	0	0	0	0	0	0	0	0
RF00026-1	0	0	0	0	0	0	0	0	0	0	0	0	0	0	0	0
AL161637.1	0	0	0	0	0	0	0	0	0	0	0	0	0	0	0	0
FAM183A	0	0	0	0	0	0.128041	0	0	0	0	0	0	0	0	0.212766	0
EBNA1BP2	13.0847	8.4323	2.22538	0	72.2388	50.1921	43.6782	15.5303	11.8056	20.2237	79.9213	4.16667	0.257732	0	10	37.8601
MIR6733	0	0	0	0	0	0	0	0	0	0	0	0	0	0	0	0
CFAP57	0.17762	0	0.0473485	1.16279	0.895522	0	0.91954	0	0	0.0931966	0.787402	0	0	0	0	0.823045
RNA5SP46	0	0	0	0	0	0.128041	0	0	0	0	0	0	0	0	0	0
TMEM125	0	0	0	0	0	0.768246	2.75862	0	0.347222	0.186393	1.5748	0	0	0	0	6.99588
C1orf210	0	0	0	0	0	0	0	0	0	0	0	0	0	0	0.212766	0
TIE1	0.0592066	0.118765	0.189394	0	4.62687	2.68886	17.7011	0.378788	0.347222	2.42311	14.9606	0	0.257732	1.36986	1.91489	0.205761
MPL	0	0.23753	0	0	7.31343	0.128041	18.3908	0	0.347222	0.465983	7.08661	0	0	0	0	0
AL139289.2	1.12493	0.712589	0.473485	0	2.98507	1.79257	5.97701	0	0.347222	1.67754	3.14961	2.08333	0	0	1.91489	2.88066
CDC20	1.24334	0.118765	2.32008	1.16279	53.5821	36.2356	7.12644	0.757576	1.73611	1.21156	37.7953	0	1.28866	0	6.59574	8.64198
ELOVL1	15.6898	13.8955	11.8371	17.4419	74.6269	46.6069	39.0805	30.303	18.0556	35.6011	70.4724	11.4583	6.70103	9.58904	20.8511	26.9547
MIR6734	0	0	0	0	0	0	0	0	0	0	0	0	0	0	0	0
MED8	15.749	13.0641	10.0379	11.6279	63.7313	35.9795	24.3678	18.5606	13.5417	27.959	62.2047	14.5833	3.35052	1.36986	12.1277	57.8189
AL139289.1	0.17762	0	0.0473485	0	0.746269	0.384123	0.229885	0.378788	0.347222	0.186393	0	1.04167	0	0	0	0.411523
SZT2	12.5518	9.73872	11.6477	3.48837	40.1493	23.8156	21.6092	9.84848	14.5833	19.8509	49.2126	11.4583	5.41237	9.58904	13.4043	19.9588
SZT2-AS1	0	0	0	0	0	0	0	0	0	0.0931966	0	0	0	0	0.212766	0.411523
MIR6735	0	0	0	0	0	0	0	0	0	0	0	0	0	0	0	0
HYI	9.29544	3.20665	0.994318	1.16279	44.4776	17.6697	38.3908	0.757576	4.51389	6.71016	45.6693	0	0.257732	0	3.61702	50.4115
HYI-AS1	0.118413	0	0.0473485	0	0.149254	0	0.689655	0	0	0.186393	1.9685	0	0	0	0	0
PTPRF	0.35524	0.23753	0.189394	26.7442	2.08955	1.15237	3.67816	0	0.347222	0.745573	2.3622	1.04167	0	0	0.212766	3.08642
KDM4A	4.20367	3.32542	9.23295	8.13953	23.2836	29.3214	22.2989	6.43939	5.90278	17.2414	51.9685	3.125	4.63918	6.84932	5.74468	9.67078
AL451062.3	0	0	0	0	0	0	0	0	0	0	0	0	0	0	0	0
KDM4A-AS1	1.00651	0.950119	0.236742	1.16279	12.0896	2.43278	3.67816	0.757576	1.38889	1.11836	11.4173	1.04167	0.257732	0	1.06383	1.64609
ST3GAL3	5.09177	4.15677	0.899621	3.48837	37.0149	23.0474	22.9885	1.13636	4.16667	7.26934	54.7244	3.125	0.257732	1.36986	6.59574	5.14403
AL451062.1	0	0	0	0	0.298507	0.128041	0.229885	0	0	0	0.393701	0	0	1.36986	0	0
RF00026-2	0	0	0	0	0	0	0	0	0	0	0	0	0	0	0	0
AL451062.2	0.0592066	0	0.0473485	0	0.298507	0.256082	0	0	0	0.0931966	0.393701	0	0	0	0	0
MIR6079	0	0	0	0	0	0	0	0	0	0	0	0	0	0	0	0
SHMT1P1	0	0	0	1.16279	0.298507	0	0.229885	0	0	0	1.1811	0	0	0	0	0
ARTN	0	0	0	0	0.895522	4.86556	9.88506	0	0	0.55918	1.5748	0	0	0	0	0.617284
AL357079.1	0.0592066	0.118765	0	0	1.79104	0.512164	2.29885	0.378788	0	0.27959	8.66142	0	0	0	0.212766	1.23457
IPO13	3.90764	3.44418	1.75189	1.16279	21.6418	16.5173	9.1954	6.43939	2.77778	7.54893	23.622	3.125	1.03093	2.73973	2.55319	12.7572
AL357079.2	0	0.118765	0.0473485	0	0.149254	0.384123	0	0	0	0	0.393701	0	0	0	0	2.6749
DPH2	5.03256	5.22565	0.520833	0	43.2836	13.9565	14.023	2.65152	6.25	5.77819	36.2205	2.08333	0.257732	0	3.82979	15.6379
ATP6V0B	40.3789	35.3919	77.8409	24.4186	83.2836	94.1101	75.1724	89.0152	47.5694	82.8518	86.6142	40.625	74.7423	73.9726	42.5532	86.214
B4GALT2	0.473653	0.831354	0.378788	0	36.8657	12.42	9.88506	0.378788	0.347222	1.95713	33.4646	0	0	0	0.638298	20.7819
CCDC24	0.53286	0.831354	0.0473485	0	1.9403	2.04866	3.90805	0.757576	1.04167	1.11836	1.9685	0	0	0	1.2766	1.85185
SLC6A9	0	0	0	26.7442	11.791	0.256082	0.45977	0	0	0.0931966	0.787402	0	0	0	0	9.0535
AL139220.2	0.118413	0	0.284091	5.81395	2.53731	0.768246	2.75862	0	0.347222	0.745573	5.11811	0	0.257732	0	0	2.26337
AL139220.1	0	0	0	0	0	0	0	0	0.347222	0.0931966	0	0	0	0	0	0
KRT8P47	0	0	0	0	0	0	0	0	0	0	0.393701	0	0	0	0	0
RN7SL479P	0	0	0	0	0	0	0	0	0	0	0	0	0	1.36986	0	0
KLF17	0	0	0	0	0	0	0	0	0	0	0	0	0	0	0	0
AL356653.1	0.17762	0	0	0	1.64179	0.256082	0.229885	0.378788	0.347222	0.186393	1.9685	0	0	0	0	0.205761
KLF18	0	0	0	0	0	0	0	0	0	0	0	0	0	0	0	0
AL359839.1	0	0	0	0	0	0	0	0	0	0	0	0	0	0	0	0
RF00019-20	0	0	0	0	0	0	0	0	0	0	0	0	0	0	0	0
OOSP1P1	0	0	0	0	0	0	0	0	0	0	0	0	0	0	0	0
AL035417.1	0	0	0	0	0	0	0	0	0	0	0	0	0	0	0	0
AL035417.2	0	0	0	0	0	0	0.229885	0	0	0	0	0	0	0	0	0.205761
DMAP1	17.1107	14.133	8.38068	4.65116	41.9403	30.6018	34.023	12.8788	19.4444	18.4529	57.4803	13.5417	4.89691	2.73973	15.1064	22.6337
ERI3	11.1901	10.2138	1.5625	1.16279	69.8507	33.6748	37.931	16.6667	12.1528	18.6393	70.4724	9.375	0	1.36986	10.2128	26.5432
ERI3-IT1	0.0592066	0	0	0	0	0.256082	0	0	0	0	0.393701	0	0	0	0	0
RNU6-369P	0	0	0	0	0	0	0	0	0	0	0	0	0	0	0	0
RNF220	26.4654	21.3777	11.5057	10.4651	64.7761	49.6799	62.2989	26.8939	27.0833	36.3467	77.9528	22.9167	7.73196	12.3288	21.0638	28.1893
MIR5584	0	0	0	0	0	0	0	0	0	0	0	0	0	0	0	0
TMEM53	1.24334	1.42518	0.662879	0	16.1194	10.8835	8.50575	5.30303	0.694444	6.98975	20.8661	0	0.257732	0	0.638298	4.11523
ARMH1	16.6963	2.3753	10.4167	1.16279	19.5522	51.3444	61.3793	10.2273	4.16667	19.7577	63.3858	10.4167	1.03093	4.10959	0.851064	0.617284
RNU5F-1	2.42747	2.73159	2.27273	1.16279	8.95522	13.1882	10.3448	7.95455	7.63889	3.44828	9.05512	3.125	0.257732	0	2.55319	7.40741
RNU5D-1	6.45352	2.96912	8.47538	0	14.0299	27.7849	16.7816	3.40909	19.0972	12.9543	48.0315	11.4583	1.28866	1.36986	8.29787	9.87654
KIF2C	0.888099	0.118765	2.08333	1.16279	38.0597	34.5711	6.43678	0	0	1.77074	29.5276	0	0.257732	0	4.68085	5.55556
AL592166.1	0.118413	0.23753	0	0	0.895522	0.512164	0.689655	0	0.694444	0.0931966	0.787402	0	0	0	0.212766	0.411523
RPS8	100	98.3373	71.1648	67.4419	99.2537	100	100	100	100	98.3225	100	100	32.9897	39.726	99.1489	99.3827
SNORD55	0	0	0	0	0	0	0	0	0	0	0	0	0	0	0	0
SNORD46	0	0.118765	0	0	0.298507	0	0.229885	0	0.347222	0	0.393701	0	0	0	0	0.205761
SNORD38A	0	0	0.0473485	0	0.149254	0	0	0	0	0	0.393701	0	0	0	0	0
SNORD38B	0	0	0	0	0	0	0	0	0	0	0	0	0	0	0	0
SNORD38B-1	0	0	0	0	0	0	0	0	0	0	0	0	0	0	0	0
RPS15AP11	1.59858	1.30641	0.189394	0	5.97015	2.68886	4.5977	1.89394	1.73611	0.745573	3.54331	0	0	0	0.638298	1.64609
BEST4	0.53286	0.356295	0	0	0.597015	0.128041	0.91954	0	0	0.186393	1.1811	0	0	0	0.638298	0.411523
PLK3	24.0379	10.8076	25.0473	4.65116	7.76119	28.041	14.2529	20.4545	7.29167	23.7651	32.2835	3.125	35.0515	24.6575	5.53191	8.84774
TCTEX1D4	0.236827	0	0.094697	0	0.746269	1.40845	0.229885	0	0.694444	1.39795	1.9685	0	0.257732	0	0.212766	0.205761
BTBD19	1.18413	0.712589	0.994318	0	2.98507	3.07298	1.6092	0.378788	0.347222	4.10065	3.93701	0	2.31959	0	0	0.411523
PTCH2	4.97336	2.73159	5.49242	1.16279	12.5373	16.2612	13.5632	10.6061	12.5	9.22647	22.4409	2.08333	2.31959	0	2.76596	12.7572
RNU5E-6P	0	0	0	0	0	0	0	0	0	0	0	0	0	0	0	0
AL136380.1	0.118413	0	0	0	0.746269	0.384123	0.229885	0	0	0.186393	1.9685	0	0	0	0	0.411523
EIF2B3	10.1835	7.12589	0.426136	6.97674	59.7015	27.6569	22.5287	9.09091	12.5	12.3952	56.6929	6.25	0.257732	0	8.93617	29.0123
RNA5SP47	0	0	0	0	0	0	0	0	0	0	0	0	0	0	0	0
CCNB1IP1P1	0.296033	0	0	0	0.746269	0	0	0	0.347222	0	0	0	0	0	0	0.617284
PPIAP35	0	0	0	0	0.149254	0	0	0.378788	0	0	0	0	0	0	0	0
MRPS17P1	0.118413	0	0.189394	0	0	0.384123	0.229885	0	0	0.0931966	1.1811	1.04167	0	0	0	0
HECTD3	6.86797	7.12589	5.63447	9.30233	34.4776	21.1268	13.3333	11.7424	7.29167	14.4455	27.1654	4.16667	0.515464	0	7.23404	15.6379
UROD	15.749	9.02613	8.80682	76.7442	95.5224	51.2164	60.9195	24.2424	9.72222	28.9842	92.126	14.5833	1.80412	2.73973	12.1277	44.0329
ZSWIM5	2.90112	2.73159	0	0	2.83582	0.384123	1.83908	0	1.04167	0.465983	1.1811	0	0	0	1.06383	1.02881
OSTCP5	0	0.118765	0	0	0.298507	0.256082	0.229885	0	0	0	0	0	0	0	0	0.205761
LINC01144	0.35524	0.356295	0	0	1.04478	0.640205	0.91954	0.378788	0.347222	0.186393	0.787402	0	0	0	0	0.617284
HPDL	0.473653	0.118765	0.0473485	1.16279	37.3134	4.22535	8.50575	0	1.04167	0.372787	35.4331	0	0	0	0.212766	4.52675
MUTYH	8.52575	7.36342	0.568182	0	35.0746	12.1639	18.1609	4.92424	6.59722	3.91426	36.6142	1.04167	0.257732	1.36986	6.38298	13.1687
TOE1	7.34162	4.75059	1.04167	0	40.2985	21.895	20.9195	3.40909	6.25	7.08295	47.2441	5.20833	0.257732	1.36986	6.80851	12.5514
TESK2	4.73653	3.91924	8.00189	0	20.8955	8.32266	12.6437	4.92424	14.5833	6.89655	23.622	11.4583	5.41237	8.21918	5.53191	11.9342
PPIAP36	0.0592066	0	0	0	0.149254	0	0	0	0.347222	0.0931966	0	0	0	0	0	0
CCDC163	1.00651	0.831354	0.142045	0	4.1791	2.43278	1.83908	0	0.694444	0.372787	3.54331	2.08333	0	0	0.851064	15.0206
MMACHC	1.95382	1.06888	0.426136	0	15.2239	11.6517	6.43678	1.51515	3.81944	3.07549	25.1969	0	0	0	0.851064	5.96708
PRDX1	56.3647	40.9739	10.1799	56.9767	89.1045	79.1293	92.4138	80.303	63.1944	76.9804	93.7008	36.4583	5.6701	4.10959	25.3191	89.7119
HMGB1P48	0	0	0	0	0	0	0	0	0	0	0	0	0	0	0	0
AKR1A1	22.0249	18.6461	4.40341	1.16279	67.1642	58.2586	75.1724	50.7576	26.3889	50.5126	83.4646	20.8333	1.03093	0	15.1064	87.4486
AL355480.3	0	0	0	0	0	0	0	0	0	0	0	0	0	0	0	0
AL355480.1	0	0	0	0	0	0	0	0	0	0	0	0	0	0	0	0
NASP	41.5631	28.266	8.61742	5.81395	88.0597	76.5685	64.8276	24.6212	43.4028	42.5909	96.8504	33.3333	5.6701	4.10959	36.383	39.5062
AL355480.2	0	0	0	0	0	0	0	0	0	0	0	0	0	0	0	0
AL355480.4	0	0	0	0	0	0	0	0	0	0	0	0	0	0	0	0
CCDC17	0.414446	0.356295	2.27273	6.97674	1.04478	1.28041	1.6092	0.378788	0.694444	1.86393	1.5748	0	3.09278	4.10959	0.212766	1.02881
GPBP1L1	24.7484	22.5653	43.5133	36.0465	54.9254	47.7593	43.2184	24.2424	19.0972	40.4473	75.5906	21.875	27.5773	41.0959	24.4681	24.6914
RPS15AP10	1.24334	0.831354	2.65152	3.48837	3.8806	3.84123	4.5977	1.89394	1.38889	3.63467	16.5354	1.04167	1.03093	1.36986	2.12766	2.46914
AL604028.2	0.236827	0.23753	0.852273	2.32558	2.23881	1.02433	1.37931	0	0.694444	1.49115	3.54331	0	1.03093	0	0.425532	0.205761
TMEM69	10.6572	5.70071	3.50379	0	48.209	24.968	33.5632	11.7424	8.68056	17.987	60.2362	9.375	1.28866	5.47945	7.02128	16.4609
IPP	5.97987	6.7696	6.10795	0	20.2985	3.84123	2.75862	1.51515	6.59722	2.7027	12.5984	4.16667	5.15464	6.84932	5.31915	9.46502
AL604028.1	0.414446	0.356295	1.13636	0	1.49254	0.128041	0.229885	0.757576	0.347222	0.372787	0.787402	1.04167	0.515464	0	0.425532	0.617284
AL603882.1	0.236827	0.118765	0	0	1.04478	0.128041	0.45977	0.757576	0	0.0931966	0	0	0	0	0.212766	0.205761
MAST2	1.95382	1.54394	9.61174	1.16279	17.4627	12.548	8.04598	3.0303	3.125	5.31221	17.7165	1.04167	3.09278	1.36986	3.19149	4.93827
TMA16P2	0	0	0.0473485	0	0	0	0	0	0	0	0	0	0	0	0.425532	0
PIK3R3	0.828893	4.51306	0.899621	0	11.194	5.37772	4.36782	1.13636	0	3.07549	13.7795	0	0.257732	0	3.40426	4.93827
AL358075.4	0	0	0	0	0	0	0	0	0	0	0	0	0	0	0	0
AL358075.1	0	0	0	0	0	0	0	0	0	0	0	0	0	0	0	0.205761
AL358075.3	0	0	0	0	0	0	0	0	0	0	0	0	0	0	0	0
AL358075.2	0	0.23753	0	0	0.149254	0	0	0	0	0	0	0	0	0	0.425532	0.205761
TSPAN1	0.118413	0	0.0473485	0	0	0	0.229885	0	0	0.0931966	0	0	0	0	0	1.23457
P3R3URF	0	0	0	0	0	0	0	0	0	0	0	0	0	0	0	0
POMGNT1	5.44701	8.19477	1.6572	0	24.3284	11.0115	16.092	4.54545	6.94444	7.45573	39.7638	4.16667	1.80412	2.73973	6.80851	15.4321
LURAP1	0	0.23753	0	0	1.19403	0.512164	5.28736	0	0	0	0.393701	0	0	0	0	0.617284
RAD54L	0.473653	0.23753	0.473485	0	29.2537	18.5659	5.05747	0	0.347222	1.67754	18.5039	0	0.257732	0	3.82979	2.6749
LRRC41	11.1308	10.8076	8.33333	2.32558	58.5075	30.7298	38.6207	8.33333	14.2361	21.9012	63.7795	6.25	0.515464	2.73973	12.5532	37.4486
UQCRH	80.6394	66.152	36.6477	12.7907	95.3731	96.6709	97.2414	89.0152	82.2917	85.4613	98.8189	65.625	12.3711	23.2877	69.5745	90.1235
NSUN4	7.1048	6.29454	8.94886	0	36.4179	27.7849	23.4483	6.81818	11.4583	17.8938	48.8189	9.375	6.95876	5.47945	5.53191	15.6379
AL122001.1	0	0	0.0473485	1.16279	0.149254	0.512164	0.229885	0	0.347222	0.0931966	1.1811	0	0	0	0	0
FAAH	1.06572	0.593824	1.89394	0	7.61194	14.5967	8.73563	3.78788	0.694444	4.28705	6.29921	0	1.54639	0	0.851064	3.49794
FAAHP1	0.53286	0.356295	0.094697	0	0.149254	0	0.229885	0	0	0	0	0	0.257732	0	0.212766	0.411523
LINC01398	0	0.118765	0	0	0	0	0	0	0	0	0	0	0	0	0	0
DMBX1	0	0	0.0473485	0	0.447761	0.128041	0	0	0	0.0931966	0	0	0	0	0	0
TMEM275	0.17762	0.593824	0	0	0	0	0	0	0	0	0	0	0	0	0	0
MKNK1-AS1	0	0.118765	0.142045	0	0.298507	0.128041	0	0	0	0.372787	0.787402	0	0.773196	0	0	0
KNCN	0	0	0	0	0	0	0	0	0	0	0	0	0	0	0	0
MKNK1	12.0782	10.9264	27.9356	10.4651	38.9552	37.2599	22.7586	24.2424	9.72222	32.712	48.0315	5.20833	51.2887	38.3562	9.14894	14.8148
MOB3C	4.26288	3.56295	1.04167	9.30233	10.4478	6.40205	4.82759	4.54545	1.73611	7.45573	16.1417	4.16667	0.773196	1.36986	3.61702	10.0823
ATPAF1	16.4594	10.8076	3.40909	2.32558	61.3433	34.6991	25.5172	10.6061	9.375	13.2339	51.9685	9.375	1.03093	1.36986	8.08511	37.6543
NENFP1	0	0	0.0473485	0	0	0	0	0	0	0	0	0	0	0	0	0
TEX38	0.118413	0.118765	0	0	0	0.128041	0	0	0.347222	0	0	0	0	0	0	0.205761
EFCAB14-AS1	0.236827	0.118765	0.0473485	0	0.298507	0	0.229885	0	0.694444	0.27959	0.393701	0	0	0	0	0
EFCAB14	34.3398	29.9287	33.7595	1.16279	48.806	50.9603	40.9195	31.8182	33.3333	46.8779	63.7795	20.8333	12.6289	19.1781	27.6596	27.7778
AL593856.1	0	0	0	0	0	0	0	0	0	0	0	0	0	0	0	0
CYP4B1	0.0592066	0	0.0473485	0	0	0	0	0	0	0	0	0	0	0	0	0
CYP4Z2P	0	0	0	0	0	0	0	0	0	0	0	0	0	0	0	0
AL731892.1	0	0	0	0	0	0	0	0	0	0	0	0	0	0	0	0
CYP4A11	0	0	0	0	0	0	0	0	0	0	0	0	0	0	0	0
CYP4A26P	0	0	0	0	0	0	0	0	0	0	0	0	0	0	0	0
CYP4A43P	0	0	0	0	0	0	0	0	0	0	0	0	0	0	0	0
CYP4A27P	0	0	0	0	0	0	0	0	0	0	0	0	0	0	0	0
CYP4A44P	0	0	0	0	0	0	0	0	0	0	0	0	0	0	0	0
CYP4X1	0	0	0.0473485	0	0	0	0	0	0	0.372787	0	0	0	0	0	0
CYP4Z1	0	0	0	0	0	0	0	0	0	0	0	0	0	0	0	0
AL450996.1	0	0	0	0	0	0	0	0	0	0	0	0	0	0	0	0
CYP4A22-AS1	0.17762	0	0.426136	0	1.64179	0.768246	1.83908	0	0	0.55918	3.93701	1.04167	0.257732	0	0.425532	0
CYP4A22	0	0	0	0	0	0	0	0	0	0.186393	0	0	0	0	0.212766	0
MTND1P34	0	0	0	0	0.149254	0.128041	0.229885	0	0	0	0.787402	0	0	0	0	0
LINC00853	0	0	0	2.32558	4.02985	0.768246	2.75862	0	0	0.0931966	3.54331	0	0	0	0	0
PDZK1IP1	0.118413	0.23753	0.094697	66.2791	16.7164	0.128041	10.1149	0	0	0.0931966	3.54331	0	0	0	0	0
TAL1	0.414446	0.118765	0.331439	72.093	71.3433	0.896287	26.4368	0	0.694444	2.32992	79.5276	0	0	0	0.851064	0.823045
AL135960.1	0	0	0	3.48837	4.92537	0	3.90805	0	0	0.372787	7.08661	0	0	0	0	0
STIL	0.888099	0.593824	1.60985	1.16279	38.0597	28.9373	9.1954	1.89394	1.04167	3.26188	45.6693	0	0	2.73973	3.19149	5.96708
CMPK1	56.4831	40.38	14.4886	22.093	76.5672	62.484	62.2989	36.3636	51.0417	47.9963	86.2205	34.375	3.60825	8.21918	35.7447	54.9383
LINC01389	0.118413	0.23753	0	0	0.149254	0.384123	0.229885	0	0	0.27959	0.393701	0	0	0	0	0.617284
FOXE3	0.0592066	0	0	0	0	0	0	0	0	0	0	0	0	0	0.212766	0
FOXD2-AS1	0.53286	0.475059	0.094697	0	0.447761	1.92061	0.689655	0	1.04167	0.931966	1.5748	0	0.257732	0	0.851064	0.411523
FOXD2	0.414446	0.831354	0.236742	0	0.447761	0.512164	0.91954	0	0.347222	0.745573	0.787402	0	0.257732	0	1.2766	0.411523
AL356458.1	0	0	0	0	0	0	0	0	0	0	0	0	0	0	0	0
RPL21P24	0	0	0	0	0	0.128041	0	0	0	0	0	0	0	0	0	0
ATP6V0E1P4	0	0	0	0	0	0	0	0	0	0	0	0	0	0	0	0
LINC01738	0	0	0	0	0	0	0	0	0	0	0	0	0	0	0	0
TRABD2B	0	0	0	0	0	0	0	0	0	0.931966	0	0	0	0	0	0
AL691459.1	0	0	0	0	0	0	0	0	0	0	0	0	0	0	0	0
AC096541.1	0	0	0	0	0	0	0	0	0	0	0	0	0	0	0	0
AL356289.1	0	0	0	0	0	0	0	0	0	0	0	0	0	0	0	0
AL356289.2	0	0	0	0	0	0	0	0	0	0	0	0	0	0	0	0
CYP46A4P	0	0	0	0	0	0	0	0	0	0	0	0	0	0	0	0
SKINT1L	0	0	0	0	0.149254	0	0.229885	0	0	0	0.393701	0	0	0	0	0
AL356289.3	0	0	0	0	0	0	0	0	0	0	0	0	0	0	0	0
AL109659.1	0	0	0.0473485	0	0	0	0	0	0	0	0	0	0	0	0	0
SLC5A9	0	0	0.520833	0	0	0	0	0	0	0.372787	0	0	0.515464	0	0	0
AL109659.2	0.0592066	0	0	0	0	0	0	0	0	0.186393	0	0	0	0	0	0
AL109659.3	0.0592066	0	0	0	0	0	0	0	0	0.0931966	0	0	0	0	0	0
SPATA6	1.83541	1.06888	0.0473485	0	2.83582	6.65813	16.5517	11.3636	3.47222	15.657	7.48031	1.04167	0.773196	0	0.638298	0.823045
PPP1R8P1	0.0592066	0	0	0	0	0.128041	0.229885	0	0.347222	0.27959	0.393701	0	0	0	0	0
RNU6-723P	0	0	0	0	0	0	0	0	0	0.0931966	0	0	0	0	0	0
AL356968.2	0	0	0	1.16279	0	0	0	0	0	0	0	0	0	0	0	0
RNU4-61P	0	0	0	0	0	0	0	0	0	0	0	0	0	0	0	0
AL356968.1	0	0	0	0	0	0	0	0	0	0	0	0	0	0	0	0
AGBL4	0.0592066	0	0	0	0	0.256082	0.229885	0	0.347222	0	0.393701	0	0.257732	0	0	0
BEND5	1.83541	0.23753	0.236742	0	5.52239	8.32266	20.9195	0	19.7917	1.49115	16.1417	21.875	0	0	1.06383	4.52675
AC099788.1	0	0	0	0	0	0.128041	0	0	0	0	0	0	0	0	0	0
AL590432.1	0	0	0	0	0	0	0	0	0	0	0	0	0	0	0	0
AGBL4-IT1	0	0	0	0	0	0	0	0	0	0	0	0	0	0	0	0
AL390023.1	0	0	0	0	0	0	0.229885	0	0	0	0	0	0	0	0	0
ZNF859P	0	0	0	0	0	0	0	0	0	0	0	0	0	0	0	0
AL645730.1	0	0	0	0	0	0	0	0	0	0	0	0	0	0	0	0
MTND2P29	0	0	0	0	0	0	0	0	0	0	0	0	0	0	0	0
ELAVL4	0	0	0	0	0	0	0	0	0	0.186393	0	0	0	0	0	0
AL583843.1	0	0	0	0	0	0	0	0	0	0	0	0	0	0	0	0
AL592182.2	0	0	0	0	0	0	0	0	0	0	0	0	0	0	0	0
AL592182.1	0	0	0	0	0	0	0	0	0	0	0	0	0	0	0	0
AL596275.2	0	0	0	0	0	0	0	0	0	0	0	0	0	0	0	0
AL592182.3	0	0	0	0	0.895522	0	0	0	0	0	0	0	0	0	0	0
AL596275.1	0.0592066	0	0	0	0.149254	0.384123	0	0	0	0.0931966	0.393701	0	0	0	0	0
HMGB1P45	0	0	0	0	0.149254	0.128041	0	0	0	0	0	0	0	0	0	0
FCF1P6	0	0	0	0	0	0.128041	0	0	0	0	0	0	0	0	0	0
DMRTA2	0	0	0	0	0	0	0	0	0	0.0931966	0	0	0	0	0	0
AL049637.2	0	0	0	0	0	0	0	0	0	0	0	0	0	0	0	0
FAF1	20.2487	16.152	6.58144	0	57.1642	40.8451	32.6437	7.19697	16.6667	20.0373	66.9291	11.4583	1.54639	1.36986	15.7447	28.8066
AL049637.1	0.0592066	0	0	0	0	0.128041	0	0	0	0	0	0	0	0	0	0
RNU6-1026P	0	0	0	0	0	0	0	0	0	0	0	0	0	0	0	0
PHBP12	0.17762	0	0	0	0.447761	0	0.45977	0	0.347222	0.372787	0.787402	0	0	0	0	0
MRPS6P2	0	0	0	0	0	0	0	0	0	0.0931966	0	0	0	0	0	0
CDKN2C	5.09177	4.75059	3.59848	22.093	43.8806	36.8758	16.3218	6.43939	1.04167	9.87884	48.0315	0	2.57732	2.73973	16.1702	17.6955
MIR4421	0	0	0	0	0	0	0	0	0	0	0	0	0	0	0	0
MIR6500	0	0	0	0	0	0	0	0	0	0	0	0	0	0	0	0
C1orf185	0	0	0	0	0	0	0	0	0	0	0	0	0	0	0	0
RF00019-21	0	0	0	0	0	0	0	0	0	0	0	0	0	0	0	0
CFL1P2	0.118413	0	0.0473485	0	0	0	0	0.378788	0	0.0931966	0	0	0	0	0	0
LINC01562	0.236827	0	0	1.16279	0	0.128041	0	0	0	0	0	0	0	0	0	1.44033
RNF11	20.0118	16.152	34.1856	60.4651	34.9254	35.2113	35.8621	18.5606	10.4167	28.3318	43.7008	4.16667	35.8247	32.8767	14.6809	28.8066
AL162430.1	0.236827	0	0.094697	0	0.447761	0.128041	0.45977	0	0	0.27959	0	0	0	0	0	0.411523
AL162430.2	0.0592066	0.118765	0.0473485	0	0.149254	0.128041	0.689655	0	0	0.0931966	0.393701	0	0	0	0	0
TTC39A	0.0592066	0.23753	0.189394	5.81395	1.04478	0	0.45977	0	0	0.27959	0.393701	0	0.257732	0	0.212766	2.6749
TTC39A-AS1	0	0	0.142045	0	0	0	0.229885	0	0	0.0931966	0	0	0.515464	0	0	0
EPS15	37.241	50.3563	57.339	13.9535	73.8806	55.0576	49.8851	31.4394	38.8889	54.0541	90.5512	30.2083	41.2371	53.4247	38.9362	42.7984
AL671986.1	0.17762	0	0.189394	0	0.447761	0.128041	0.229885	0	0.694444	0.55918	3.54331	0	0	0	0.425532	0
RNU6-877P	0.0592066	0.118765	0.094697	0	0	0	0	0	0	0.186393	0.393701	0	0	0	0.212766	0
AC104170.2	0.118413	0.118765	0.0473485	0	0.746269	0	0.45977	0	0.347222	0.0931966	1.5748	0	0	0	0	0.411523
AC104170.1	0.828893	0.950119	0.0473485	0	5.52239	0	0.91954	0	0.694444	0.0931966	0.393701	0	0	0	0.851064	0.411523
RNU6-1281P	0	0	0	0	0	0	0	0	0	0	0.393701	0	0	0	0	0
CALR4P	0.0592066	0	0	0	0	0	0	0	0	0	0.393701	0	0	0	0	0.205761
OSBPL9	22.9722	15.5582	39.8674	9.30233	66.2687	46.0948	50.1149	13.6364	22.9167	32.712	76.7717	14.5833	52.8351	60.274	18.7234	47.5309
GAPDHP51	0	0	0	0	0	0	0.45977	0	0	0	0	0	0	0	0	0
SLC25A6P3	0	0	0.0473485	0	0.149254	0	0	0	0	0	0	0	0	0	0	0
RF00568	0	0	0.094697	0	0	0	0	0	0	0.0931966	0.393701	0	0.257732	1.36986	0	0
NRDC	34.5767	33.2542	53.9773	27.907	80.2985	65.0448	63.908	35.9848	32.6389	54.1473	89.3701	21.875	72.9381	69.863	47.4468	71.1934
AL050343.1	0.947306	0.475059	0.426136	1.16279	1.64179	0.256082	1.37931	0.378788	1.73611	0.83877	5.51181	0	2.57732	2.73973	0.638298	0.411523
AL050343.2	0	0	0.094697	0	0.149254	0.128041	0.45977	0	0	0.186393	0	0	0	0	0	0.205761
MIR761	0	0	0	0	0	0	0	0	0	0	0	0	0	0	0	0
TSEN15P2	0.0592066	0	0	0	0	0	0	0	0	0	0	0	0	0	0	0
RAB3B	0.296033	0.23753	0.520833	0	0.597015	0.384123	0.689655	0.757576	0.694444	0.652377	1.1811	1.04167	0.257732	2.73973	0.425532	3.90947
RNA5SP48	0	0	0	0	0	0	0	0	0	0	0	0	0	0	0	0
AL445685.2	0	0	0	0	0	0	0	0	0	0	0	0	0	0	0	0
RN7SL290P	0	0	0	0	0	0	0	0	0	0	0	0	0	0	0	0
TXNDC12	17.466	13.8955	5.91856	0	32.0896	28.9373	29.6552	25.7576	11.1111	18.1733	26.7717	5.20833	6.95876	5.47945	10.8511	37.4486
AL445685.3	0	0	0	0	0	0	0	0	0	0	0	0	0	0	0	0
KTI12	4.4997	3.20665	0.331439	0	17.6119	14.7247	8.96552	1.51515	2.43056	6.33737	37.7953	1.04167	0.257732	0	3.19149	8.23045
AL445685.1	0.0592066	0.118765	0	0	0.298507	0.768246	0	0.378788	0	0.0931966	0	0	0	0	0	1.02881
TXNDC12-AS1	0.0592066	0	0	1.16279	0	0	0	0	0	0.0931966	0.393701	0	0	0	0.212766	0
BTF3L4	25.5181	17.8147	15.1042	9.30233	74.7761	51.0883	51.4943	27.2727	21.1806	46.9711	83.4646	21.875	7.21649	8.21918	20	38.0658
ZFYVE9	4.97336	1.42518	0.094697	0	9.10448	4.9936	7.58621	2.65152	1.04167	4.19385	12.5984	0	0	0	1.2766	5.76132
RN7SL788P	0	0	0	0	0	0	0	0	0	0	0	0	0	0	0	0
AL139156.2	0.118413	0	0	0	0.149254	0	0.229885	0	0	0.0931966	0.393701	0	0	0	0	0
AL139156.1	0.0592066	0	0	0	0.149254	0.128041	0	0	0	0	0	0	0	0	0	0
PDCL3P6	0	0.118765	0	0	0.149254	0.128041	0.45977	0	0	0.0931966	0.393701	0	0	0	0	0
AL139156.3	0.17762	0.118765	0	0	0.149254	0	0.45977	0	0	0.0931966	0.393701	0	0	0	0	0.205761
DNAJC19P7	0.0592066	0	0	0	0.149254	0	0.229885	0	0	0	0.393701	0	0	0	0	0
ANAPC10P1	0.35524	0.23753	0	0	0.746269	0.256082	0.91954	0.378788	0	0.0931966	0.393701	0	0	0	0	0
CC2D1B	10.7756	8.66983	13.7784	0	10.8955	20.9987	14.4828	6.81818	7.63889	12.9543	27.1654	2.08333	4.12371	5.47945	10.2128	11.9342
AL513218.1	0.236827	0	0	0	0.298507	0	0	0.378788	0	0	0	0	0	0	0	0
PLA2G12AP1	0.17762	0	0.0473485	0	0.746269	0	0.45977	0	0	0.0931966	0.787402	0	0	0	0.212766	0.205761
ORC1	0.888099	0.23753	0.994318	1.16279	40.8955	27.2727	5.97701	1.13636	0	1.77074	33.8583	0	0	0	1.48936	5.34979
PRPF38A	27.9455	23.1591	37.0265	5.81395	71.3433	54.5455	51.2644	19.697	29.5139	34.7623	81.1024	19.7917	11.0825	23.2877	30.4255	29.2181
TUT4	49.9112	41.3302	58.1913	2.32558	48.3582	45.4545	61.6092	10.2273	52.0833	32.1528	85.0394	41.6667	29.3814	47.9452	48.7234	54.321
AL591167.1	0	0	0.520833	0	0	0	0	0	0	0.0931966	0	0	0	0	0	0
EEF1GP7	0.17762	0	0	0	0	0	0.229885	0	0	0	1.1811	0	0	0	0.638298	0
GPX7	10.2427	7.71971	3.17235	0	30.7463	23.4315	34.7126	0.757576	5.20833	2.7959	59.0551	8.33333	0.257732	2.73973	9.57447	44.6502
SHISAL2A	23.0314	15.3207	3.83523	0	0	2.43278	1.6092	0	18.0556	0.186393	1.1811	22.9167	3.35052	0	11.2766	12.963
COA7	2.78271	0.950119	0.662879	1.16279	40.8955	17.4136	13.3333	2.27273	2.43056	8.76048	42.5197	2.08333	0.515464	0	1.70213	11.3169
NDUFS5P3	0.0592066	0	0	0	0	0	0	0	0	0	0	0	0	0	0	0
RN7SL62P	0	0	0	0	0	0	0	0	0	0	0	0	0	0	0	0
ZYG11B	14.032	6.17577	37.358	1.16279	35.5224	37.2599	20.4598	12.5	11.8056	33.178	58.6614	6.25	27.5773	34.2466	5.74468	14.4033
RNU2-30P	0	0	0	0	0	0.128041	0	0	0	0.0931966	0	0	0	0	0	0
RPS13P2	7.04559	5.46318	0	0	18.209	7.93854	10.8046	10.2273	2.77778	2.51631	5.90551	1.04167	0	0	1.91489	4.11523
RNU6-969P	0	0	0	0	0	0	0	0	0.347222	0.0931966	0	0	0	0	0	0
ZYG11A	0.0592066	0	0.094697	0	0	0	0	0.378788	0.694444	0.186393	0.393701	0	0	0	0	3.08642
AC099677.4	0	0	0	0	0	0	0	0	0	0	0	0	0	0	0	0.205761
ECHDC2	19.5382	12.5891	8.52273	1.16279	3.73134	21.895	25.5172	5.30303	14.5833	9.41286	18.5039	6.25	0.515464	1.36986	17.0213	12.1399
AC099677.1	0	0.356295	0.0473485	0	0	0	0.91954	0.378788	0	0.465983	0.787402	0	0	0	0.425532	0.411523
AC099677.2	0.0592066	0	0	0	0	0	0	0	0	0.0931966	0	0	0	0	0	0
SCP2	36.8857	36.6983	49.1951	3.48837	68.9552	72.9834	67.5862	46.2121	30.2083	65.2377	84.252	31.25	11.0825	27.3973	51.4894	48.9712
AC099677.5	0	0	0	0	0	0	0	0	0	0	0	0	0	0	0	0
AC099677.7	0	0	0	0	0	0	0	0	0	0	0	0	0	0	0	0
AC099677.6	0	0	0	0	0	0	0	0	0	0	0	0	0	0	0	0
AC099677.3	0	0	0	0	0	0	0	0	0	0	0	0	0	0	0	0
AL445183.3	0.0592066	0	0	0	0	0	0.45977	0	0.347222	0.0931966	0	0	0	0	0	0
TUBBP10	0	0	0	0	0	0	0	0	0	0	0	0	0	0	0	0
PODN	0	0.118765	0.0473485	0	0	0	0	0	0	1.11836	0.393701	0	0	0	1.91489	0
AL445183.1	0	0	0	0	0	0	0	0	0	0	0	0	0	0	0	0
HIGD1AP11	0	0	0	0	0	0	0	0	0	0.0931966	0	0	0	0	0	0
SLC1A7	0	1.90024	0	0	0	0	0	0	0	0.186393	0	0	0	0	3.19149	0
AL445183.2	0	0	0	0	0	0	0	0	0	0	0	0	0	0	0	0
AL606760.4	0	0	0	0	0	0	0	0	0	0	0	0	0	0	0	0
CPT2	6.86797	5.46318	11.3636	0	37.3134	32.6504	21.3793	7.57576	5.90278	16.2162	50	6.25	3.09278	2.73973	6.80851	18.93
AL606760.2	0.35524	0.593824	0.378788	0	0.298507	0.384123	1.14943	0	0.347222	0.745573	1.5748	0	0	0	0	0.823045
CZIB	18.9461	16.152	10.2746	2.32558	63.5821	46.735	48.5057	19.697	16.3194	28.6114	72.4409	7.29167	3.09278	8.21918	17.8723	27.3663
AL606760.3	2.01303	1.90024	1.08902	0	0.746269	0	0.229885	0.378788	0.694444	0.186393	2.75591	0	0	0	0.638298	2.26337
MAGOH	40.4973	38.5986	15.767	8.13953	84.7761	56.21	61.8391	27.2727	37.8472	40.4473	88.9764	23.9583	6.4433	8.21918	38.7234	47.7366
AL606760.1	0.236827	0	0.236742	0	1.04478	0.384123	0.45977	0	0.347222	0.186393	1.9685	0	0	0	0	0.823045
LRP8	3.19716	2.85036	1.32576	0	18.5075	28.5531	12.4138	3.0303	2.77778	11.2768	37.0079	0	0.515464	0	4.89362	7.20165
AL355483.4	0	0.118765	0	0	0.149254	0	0.229885	0	0	0.0931966	0.393701	0	0	0	0	0.205761
AL355483.2	0	0.118765	0	0	0.298507	0	0.229885	0	0	0	0.393701	0	0	0	0.425532	0
AL355483.1	0	0	0	0	0.149254	0	0	0	0	0	0.787402	0	0	0	0	0
AL355483.3	0	0	0	0	0	0	0	0	0	0	0	0	0	0	0	0
LINC01771	1.06572	0.831354	0.0473485	0	0.447761	0.512164	0.229885	0	0.694444	0.186393	1.1811	0	0	0	0.425532	1.23457
AC119428.3	0	0	0	0	0	0	0	0	0	0	0	0	0	0	0	0
AC119428.1	0	0	0	0	0	0	0	0	0	0	0	0	0	0	0	0
AC119428.2	0.414446	0.475059	0.0473485	0	0.149254	2.30474	1.14943	4.92424	5.90278	3.16869	0	3.125	0	0	0.212766	0
SLC25A3P1	0	0.118765	0	0	0	0	0	0	0	0	0	0	0	0	0	0
DMRTB1	0	0	0	0	0	0	0	0	0	0	0	0	0	0	0	0
GLIS1	0.296033	0.831354	0	0	0	0	0	0	0	0.0931966	0	0	0	0	0.425532	0.205761
RNU7-95P	0	0	0	0	0	0	0	0	0	0	0	0	0	0	0	0
NDC1	5.15098	3.44418	1.18371	1.16279	45.2239	36.2356	14.023	0.757576	3.47222	7.64212	48.8189	3.125	0.257732	1.36986	4.04255	9.67078
RF00418	0.0592066	0	0	0	0	0.512164	0	0	0	0	0.787402	0	0	0	0	0
AL049745.1	0	0	0	0	0	0	0	0	0	0	0	0	0	0	0	0
YIPF1	5.50622	7.71971	14.7727	1.16279	22.0896	20.6146	18.3908	14.7727	8.68056	19.5713	32.6772	7.29167	22.6804	17.8082	9.78723	22.428
DIO1	0	0	0	0	0	0	0	0	0	0.186393	0	0	0	0	0	0
HSPB11	22.3801	28.8599	10.0379	1.16279	73.1343	48.5275	48.7356	18.1818	18.4028	24.5107	83.0709	12.5	4.89691	4.10959	29.5745	48.9712
LRRC42	4.79574	1.78147	8.61742	0	37.1642	13.0602	15.8621	5.30303	1.73611	6.15098	35.0394	2.08333	8.76289	6.84932	4.68085	10.2881
HNRNPA3P12	0	0	0	0	0.149254	0	0	0	0	0	0	0	0	0	0	0
LDLRAD1	0	0	0	0	0	0	0	0	0	0	0	0	0	0	0	0
TMEM59	67.7916	68.4086	45.4545	52.3256	88.5075	72.7273	88.046	53.7879	63.1944	68.4063	93.7008	40.625	54.8969	54.7945	66.8085	93.0041
AL353898.3	0.651273	0.950119	1.4678	3.48837	0.746269	1.92061	0.45977	0.378788	1.73611	0.931966	1.9685	1.04167	1.80412	1.36986	0.425532	1.64609
TCEANC2	7.164	5.81948	9.42235	1.16279	23.1343	26.2484	26.4368	7.95455	6.59722	14.6319	44.4882	6.25	2.57732	2.73973	8.51064	5.76132
MIR4781	0	0	0	0	0	0	0	0	0	0	0	0	0	0	0	0
AL353898.1	0	0	0.142045	0	0.149254	0	0	0	0	0	0.787402	0	0	0	0	0
AL353898.2	0	0	0	0	0.149254	0	0	0	0	0	0	0	0	0	0	0
AL357673.1	0.0592066	0	0	0	0	0.128041	0.229885	0	0	0.0931966	0	0	0	0	0	0
CDCP2	0	0	0	0	0	0	0	0	0	0	0.393701	0	0	0	0	0
AL357673.2	0	0	0	0	0	0	0	0	0	0	0	0	0	0	0	0
CYB5RL	1.7762	0.712589	1.23106	1.16279	18.5075	10.3713	5.05747	0.757576	1.04167	3.35508	32.6772	1.04167	0.515464	0	0.638298	2.26337
MRPL37	17.3475	14.133	2.08333	12.7907	85.0746	58.7708	54.9425	24.6212	12.1528	28.5182	80.315	12.5	0.515464	0	12.1277	35.5967
SSBP3	15.3345	13.8955	1.70455	48.8372	67.6119	33.2907	48.7356	12.8788	7.63889	24.7903	81.1024	2.08333	1.28866	2.73973	24.8936	23.0453
SSBP3-AS1	0.414446	0.356295	0	0	0.298507	0	0.689655	0	0	0.0931966	1.1811	1.04167	0	0	0	0
AL161644.1	0.414446	0	0	0	0	0	0	0	0	0.0931966	0.393701	0	0	0	0	0
AL035415.1	0	0	0	0	0	0	0	0	0	0	0	0	0	0	0	0
AC099796.1	0	0	0	0	0	0	0	0	0	0	0	0	0	0	0	0
AC099796.2	0	0	0	0	0.149254	0	0	0	0	0	0	0	0	0	0	0
HNRNPA1P63	0	0	0	0	0	0	0	0	0	0	0	0	0	0	0	0
ACOT11	0.769686	0.475059	0.61553	2.32558	3.73134	11.3956	26.8966	0.378788	0.694444	5.12582	22.4409	1.04167	0.773196	0	0.212766	0.823045
FAM151A	0	0	0	0	0	0	0.229885	0	0	0	0	0	0	0	0	0
AL590093.1	0	0	0	0	0	0	0	0	0	0	0	0	0	0	0	0
MROH7	0	0	0.142045	0	0	0.512164	5.74713	0	0	0.465983	2.3622	0	0	0	0	0.411523
MROH7-TTC4	0	0	0	0	0	0.128041	0.229885	0	0	0.186393	0	0	0	0	0	0
TTC4	6.51273	4.038	0.94697	0	30.4478	13.1882	18.1609	6.43939	6.25	7.54893	34.6457	2.08333	0	0	5.31915	9.87654
PARS2	1.42096	1.06888	0.094697	0	11.4925	1.79257	6.2069	1.89394	1.04167	1.49115	11.811	1.04167	0	0	1.48936	2.05761
TTC22	3.19716	4.038	0.994318	1.16279	0.149254	0	3.21839	0	2.08333	0.27959	0.393701	2.08333	0.773196	1.36986	8.29787	4.32099
AC096536.1	0	0	0	0	0	0	0	0	0	0	0	0	0	0	0	0
LEXM	0.17762	1.90024	0	0	0.149254	0	0	0	0	0	0	0	0	0	2.76596	0
DHCR24	1.95382	0.950119	3.50379	1.16279	11.0448	42.3816	11.0345	6.81818	3.47222	13.9795	28.3465	0	1.03093	0	1.48936	8.23045
AC096536.2	0	0	0	0	0.298507	0	0	0	0	0	0	0	0	0	0	0
DHCR24-DT	0	0	0.0473485	0	0.298507	0	0	0	0	0	0.393701	0	0	0	0	0.411523
AL590440.2	0.118413	0	0.189394	0	0.149254	0.384123	0.229885	0	0	0.186393	0.787402	0	0	0	0	0.205761
TMEM61	0	0.118765	0.0473485	0	0.298507	0	0.229885	0	0	0.0931966	0	0	0	0	0	0
AL590440.1	0	0	0	0	0	0	0	0	0	0	0	0	0	0	0	0
BSND	0	0	3.88258	0	0	0.384123	0	0.378788	0	0.745573	0	0	4.12371	1.36986	0	0
PCSK9	0.118413	0	11.6951	0	0.298507	0.640205	0	0.378788	0	1.39795	0	0	9.02062	9.58904	0	0.411523
USP24	23.4458	23.1591	17.5189	30.2326	57.7612	45.4545	37.931	14.3939	30.2083	33.644	70.0787	18.75	6.4433	8.21918	24.4681	13.9918
MIR4422HG	0.71048	2.019	0	0	0.298507	0	0	0	0.347222	0	0.787402	2.08333	0	0	2.76596	0
GYG1P3	0	0	0	0	0	0	0	0	0	0	0	0	0	0	0	0
MIR4422	0	0	0	0	0	0	0	0	0	0	0	0	0	0	0	0
AL603840.1	0	0	0	0	0	0	0	0	0	0	0.393701	0	0	0	0	0
GOT2P1	0	0	0	0	0	0	0	0	0	0.0931966	0	0	0	0	0	0
MTCO2P34	0	0	0	0	0	0	0	0	0	0	0	0	0	0	0	0
RN7SKP291	0	0	0	0	0	0	0	0	0	0	0	0	0	0	0	0
RNU6-830P	0	0	0	0	0	0	0	0	0	0	0	0	0	0	0	0
RF00019-22	0	0	0	0	0	0	0	0	0	0	0	0	0	0	0	0
LINC01755	0	0	0	0	0	0	0	0	0	0	0.393701	0	0	0	0	0
LINC01753	0	0	0	0	0	0	0	0	0	0	0	0	0	0	0	0
PIGQP1	0	0	0	0	0	0	0	0	0	0	0	0	0	0	0	0
AL353681.1	0	0	0	0	0	0	0	0	0	0	0	0	0	0	0	0
AC119674.1	0	0	0.284091	0	0	0	0	0	0	0.186393	0	0	0.257732	1.36986	0	0
AC119674.2	0	0	0.094697	0	0.149254	0.128041	0	0	0	0.27959	0	0	0	0	0	0.205761
RPSAP20	0	0	0	0	0.149254	0.128041	0	0	0	0	0	0	0	0	0	0
LINC01767	0	0	0	0	0	0	0	0	0	0	0	0	0	0	0	0
PLPP3	0	0	1.75189	0	1.9403	3.20102	1.14943	2.27273	2.77778	5.12582	7.08661	0	1.54639	4.10959	0.212766	3.7037
RPL21P23	0	0.118765	0	0	0	0.128041	0	0	0	0.0931966	0	0	0	0	0	0
RPL23AP85	0	0	0	0	0	0	0	0	0	0	0	0	0	0	0	0
AC099789.1	0	0	0	0	0	0	0	0	0	0	0	0	0	0	0	0
PRKAA2	0	0	0	0	0.149254	0	0.91954	0	0	0.465983	0	0	0	0	0	0.205761
FYB2	0	0	0	0	0	0	0.229885	0	0	0	0	0	0	0	0	0
AL360295.1	0	0	0	0	0	0	0	0	0	0	0	0	0	0	0	0
C8A	0	0	0	0	0	0	0	0	0	0	0	0	0	0	0	0
C8B	0	0	0	0	0	0	0	0	0	0	0	0	0	0	0	0
AL161740.1	0	0	0	0	0	0	0	0	0	0	0	0	0	0	0	0
DAB1	0.947306	0.475059	0.0473485	0	0	0	0.229885	0	0	0	0	0	0	0	0.425532	0
AL390243.1	0	0	0	0	0.149254	0	0	0	0	0	0	0	0	0	0	0
RPS20P5	0	0	0	0	0	0	0	0	0	0	0.787402	0	0	0	0	0
DAB1-AS1	0	0	0	0	0	0	0	0	0.347222	0	0	0	0	0	0	0
HNRNPA1P6	0.0592066	0	0	0	0	0	0.229885	0	0	0	0.393701	0	0	0	0	0
RPS26P15	0.118413	0.23753	0.0473485	0	1.04478	0.640205	1.37931	0	0.694444	0.372787	1.1811	0	0	0	0.212766	0.823045
AL445193.2	0	0	0	0	0	0	0	0	0	0	0	0	0	0	0	0
AL445193.1	0	0	0	0	0	0	0	0	0	0	0	0	0	0	0	0
AL357373.1	0	0	0	0	0	0	0	0	0	0	0.393701	0	0	0	0	0
OMA1	13.2623	10.095	10.6534	1.16279	37.1642	18.0538	23.908	6.43939	12.5	11.836	48.0315	5.20833	4.63918	4.10959	10.4255	18.107
AL035411.2	0	0	0	0	0	0	0	0	0	0	0	0	0	0	0	0
RN7SL713P	0	0	0	0	0	0	0	0	0	0	0	0	0	0	0	0
TACSTD2	0.17762	0.118765	4.45076	1.16279	0.149254	1.28041	0	0	0.347222	0.55918	1.9685	0	0	0	0	0.411523
AL035411.1	0.473653	0.356295	0.094697	0	5.97015	1.92061	2.29885	1.13636	0.347222	0.27959	0.787402	2.08333	0	0	0.851064	1.23457
MYSM1	22.7946	23.8717	26.4678	4.65116	40.1493	39.6927	29.6552	9.84848	20.8333	28.7978	63.7795	15.625	20.6186	20.5479	24.4681	23.4568
AL136985.3	0.118413	0.23753	1.84659	0	0	0.128041	0	0	0	0.0931966	0	0	0	0	0.212766	0.205761
JUN	84.1918	74.228	53.9299	13.9535	49.7015	70.1665	70.5747	51.5152	75.6944	62.4418	73.2283	50	51.0309	45.2055	78.0851	74.2798
LINC01135	2.24985	1.42518	0.331439	0	0.447761	1.92061	0.45977	0.378788	2.77778	2.23672	1.9685	1.04167	0.257732	0	2.12766	0.411523
AL136985.2	0.118413	0	0.0473485	0	0	0	0	0.378788	0	0.0931966	0	0	0.257732	0	0.212766	0
AL136985.1	0	0	0	0	0	0	0	0	0	0	0	0	0	0	0	0
AC105277.1	0.17762	0.23753	0.331439	0	0.895522	0.896287	0	0.757576	0	1.95713	0.787402	0	0.515464	1.36986	0.851064	1.64609
LINC01358	0.236827	1.18765	0	0	0.298507	0.128041	2.52874	0	1.04167	0.186393	0.393701	0	0	0	1.06383	9.46502
PHBP3	0	0	0	0	0	0	0.229885	0	0	0.0931966	0	0	0	0	0	0
AL592431.2	0	0	0	0	0	0	0	0	0	0	0	0	0	0	0	0
AL592431.1	0	0	0	0	0	0	0	0	0	0	0	0	0	0	0	0
AC093425.1	0.118413	0	0.426136	0	0.298507	0.128041	0.229885	0	0	0.27959	0.393701	0	0.515464	1.36986	0	0.617284
AC093424.1	0	0	0	0	0	0	0	0	0	0	0	0	0	0	0	0.205761
FGGY	2.78271	3.20665	4.35606	0	13.1343	7.29834	11.4943	4.16667	4.51389	2.98229	16.5354	6.25	4.38144	4.10959	2.34043	7.40741
MIR4711	0	0	0	0	0	0	0	0	0	0	0	0	0	0	0	0
AL035416.1	0	0	0	0	0	0	0	0	0	0	0	0	0	0	0	0
HOOK1	10.1835	2.73159	0.473485	1.16279	41.3433	1.28041	8.96552	0	7.98611	0.931966	35.4331	4.16667	0.257732	0	1.48936	24.0741
CYP2J2	0.0592066	0	0	0	0.895522	0.128041	0.91954	0	0.347222	0	1.9685	1.04167	0	0	0	1.02881
RN7SL475P	0	0	0	0	0	0	0	0	0	0	0	0	0	0	0	0
C1orf87	0	0	0	0	0	0	0	0	0	0	0	0	0	0	0	0
PGBD4P8	0	0	0	0	0	0	0	0	0	0	0	0	0	0	0	0
AC097066.1	0	0	0	0	0	0	0	0	0	0	0	0	0	0	0	0
LINC01748	0.0592066	0	0.142045	0	0.298507	1.79257	0.45977	0	0	0.0931966	0.393701	0	0	0	0	0
AC099792.1	0	0	0	0	0	0	0	0	0	0.0931966	0	0	0	0	0	0
NFIA	10.0059	9.38242	0.710227	27.907	77.6119	37.2599	37.931	19.3182	0.347222	38.2106	74.8031	0	0.515464	1.36986	5.10638	2.88066
NFIA-AS2	0	0	0	0	0	0	0	0	0	0	0.393701	0	0	0	0	0
AC096947.1	0.118413	0.118765	0	0	4.02985	0.512164	0.45977	0.378788	0	0.372787	1.1811	0	0	0	0.212766	0
NFIA-AS1	0.0592066	0	0	0	0.597015	0.384123	0.229885	0	0	0.55918	0.393701	0	0	0	0	0
AC099791.3	0	0	0	0	0	0.640205	0	0	0	0	0	0	0	0	0	0
AC099791.1	0	0	0	0	0	0	0	0	0	0	0	0	0	0	0	0
TM2D1	20.8999	19.2399	32.5758	10.4651	47.1642	43.2778	47.1264	15.1515	19.4444	34.6692	66.1417	19.7917	16.7526	13.6986	21.9149	30.2469
AC099791.2	1.24334	0.593824	0	0	1.04478	0.384123	10.8046	0	0.347222	0.55918	3.93701	4.16667	0	0	1.48936	0.617284
PATJ	25.5181	7.36342	1.27841	0	1.64179	3.20102	11.2644	0	14.9306	1.77074	9.44882	6.25	0.257732	1.36986	4.68085	11.1111
RNU6-414P	0	0	0	0	0	0	0	0	0	0	0	0	0	0	0	0
RNU6-1177P	0	0	0	0	0	0	0	0	0	0	0	0	0	0	0	0
LAMTOR5P1	0.118413	0	0	0	0.149254	0	0	0	0.347222	0	0	0	0	0	0	0.205761
RN7SL180P	0.53286	0	0	0	0	0	0.45977	0	0.347222	0	0.393701	0	0	0	0	0.411523
MIR3116-1	0	0	0	0	0	0	0	0	0	0	0	0	0	0	0	0
MIR3116-2	0	0	0	0	0	0	0	0	0	0	0	0	0	0	0	0
PIGPP2	0	0	0	0	0	0	0	0	0	0	0	0	0	0	0	0
RPS15AP7	0	0	0	0	0	0	0	0	0	0	0	0	0	0	0	0
L1TD1	0.888099	0.593824	0.94697	1.16279	1.19403	2.94494	2.29885	1.51515	9.02778	3.54147	7.87402	0	2.31959	2.73973	0.425532	1.64609
AL162739.1	0	0	0	0	0	0	0	0	0	0	0	0	0	0	0	0
RF00019-23	0	0	0	0	0	0	0	0	0	0	0	0	0	0	0	0
KANK4	0.0592066	0	0	0	0	0.256082	0	0	0.347222	0.186393	0	0	0	0	0	0.411523
RNU6-371P	0	0	0	0	0	0	0	0	0	0	0	0	0	0	0	0
USP1	28.1824	21.8527	23.3902	6.97674	79.1045	71.1908	48.7356	21.9697	24.6528	31.2209	88.189	18.75	13.4021	13.6986	24.2553	28.6008
DOCK7	4.26288	3.56295	2.93561	4.65116	35.0746	18.1818	20.2299	6.43939	7.63889	11.6496	51.9685	4.16667	1.80412	1.36986	2.12766	10.6996
AL451044.1	0	0	0	0	0	0	0	0	0	0	0	0	0	0	0	0
ANGPTL3	0.0592066	0	0	0	0.447761	0	0	0	0	0.372787	1.1811	0	0	0	0.212766	0
AL138847.2	0	0	0.0473485	0	0.149254	0	0	0	0	0	0.393701	0	0	0	0	0
AL138847.1	0.118413	0	0	0	0.298507	0.128041	0	0	0	0.0931966	1.9685	0	0	0	0	0.205761
AC103923.1	0.236827	0.118765	0	0	1.34328	0.128041	0.689655	0	0	0.0931966	2.75591	0	0	0	0.212766	0
ATG4C	7.04559	5.58195	4.45076	1.16279	40.2985	30.4738	28.2759	10.6061	13.1944	18.6393	60.6299	12.5	1.28866	1.36986	6.17021	34.1564
AC099794.1	0	0	0	0	0	0	0	0	0	0	0	0	0	0	0	0
AC099794.2	0	0	0	0	0	0	0	0	0	0	0	0	0	0	0	0
LINC01739	0	0	0	0	0	0	0	0	0	0	0	0	0	0	0	0
AL162400.1	0	0	0	0	0	0	0	0	0	0	0	0	0	0	0	0
AL162400.2	0	0	0	0	0	0	0	0	0	0	0	0	0	0	0	0
AC096543.1	0	0	0	0	0	0	0	0	0	0	0	0	0	0	0	0
LINC00466	0	0	0.0473485	0	0	0	0.45977	0	0	0	0	0	0	0	0	0
RNA5SP49	0	0	0	0	0	0	0	0	0	0	0	0	0	0	0	0
AC096543.2	0	0	0	0	0	0	0	0	0	0	0	0	0	0	0	0
RPSAP65	0	0	0	0	0	0	0	0	0	0	0	0	0	0	0	0
FOXD3-AS1	0	0	0	0	0	0.128041	0	0	0	0.186393	0	0	0	0	0	0.205761
FOXD3	0	0	0	0	0	0	0	0	0	0	0	0	0	0	0	0
MIR6068	0	0	0	0	0	0	0	0	0	0	0	0	0	0	0	0
RF00019-24	0	0	0	0	0	0	0	0	0	0	0	0	0	0	0	0
AL049636.1	0	0	0	0	0	0	0	0	0	0	0	0	0	0	0	0
ALG6	10.4796	9.50119	11.6477	0	34.1791	22.1511	16.5517	4.16667	5.20833	11.1836	38.5827	10.4167	6.95876	10.9589	7.44681	13.786
ITGB3BP	12.907	8.7886	3.0303	1.16279	61.791	38.9245	31.954	7.95455	19.4444	19.2917	73.2283	15.625	3.60825	1.36986	10.4255	16.0494
EFCAB7	4.85494	3.32542	1.84659	0	13.5821	3.07298	11.2644	0.757576	4.51389	3.16869	20.8661	5.20833	2.57732	2.73973	3.61702	9.0535
RN7SL488P	0	0	0.0473485	0	0	0	0	0	0	0	0	0	0	0	0	0
RNU7-123P	0	0	0.0473485	0	0	0	0	0	0	0	0	0	0	0	0	0
DLEU2L	1.18413	1.18765	1.84659	0	3.8806	2.43278	4.82759	0.757576	1.04167	1.67754	7.08661	0	1.80412	2.73973	1.06383	1.23457
RF02110	0	0	0	0	0	0	0	0	0	0	0	0	0	0	0	0
RF02109	0	0	0	0	0	0	0	0	0	0	0	0	0	0	0	0
RF02108	0	0	0	0	0	0	0	0	0	0	0	0	0	0	0	0
RF02107	0	0	0	0	0	0	0	0	0	0	0	0	0	0	0	0
RF02106	0	0	0	0	0	0	0	0	0	0	0	0	0	0	0	0
RF02105	0	0	0	0	0	0	0	0	0	0	0	0	0	0	0	0
PGM1	11.0716	11.0451	18.4186	0	19.8507	42.2535	30.8046	8.33333	7.98611	13.7931	41.7323	6.25	12.6289	27.3973	15.7447	29.8354
RN7SL130P	0.414446	0.23753	1.98864	0	0	2.04866	0.689655	0	0.694444	1.21156	1.9685	0	0.773196	5.47945	0.425532	0.617284
ROR1	0	0	0	0	0.149254	0	0	0	0.694444	0	0.787402	0	0	0	0	0
AL161742.1	0	0	0	0	0.298507	0	0	0	0.347222	0	0	0	0	0	0	0.205761
CFL1P3	0.0592066	0	0	0	0	0	0	0	0	0	0	0	0	0	0	0
RNU6-809P	0	0	0	0	0	0	0	0	0	0	0	0	0	0	0	0
RF00019-25	0	0	0	0	0	0	0	0	0	0	0	0	0	0	0	0
ROR1-AS1	0	0	0.0473485	0	0	0	0.229885	0	0	0	0	0	0	0	0	0
AL445205.1	0	0	0	0	0	0	0	0	0	0	0	0	0	0	0	0
UBE2U	0	0	0	0	0	0	0	0	0	0	0	0	0	0	0	0
RNU7-62P	0	0	0	0	0	0	0	0	0	0	0	0	0	0	0	0
CACHD1	0.947306	0	0.804924	0	1.34328	0.768246	4.82759	0.378788	0	1.58434	6.69291	0	1.54639	0	0	0.205761
MIR4794	0	0	0	0	0	0	0	0	0	0	0	0	0	0	0	0
RAVER2	2.01303	0.950119	1.13636	2.32558	22.9851	22.1511	24.1379	0.378788	4.16667	5.5918	46.8504	0	0.773196	0	0	2.6749
JAK1	83.4813	80.0475	75.7576	12.7907	71.791	76.3124	75.6322	49.6212	77.0833	71.9478	92.9134	69.7917	75.5155	84.9315	89.5745	56.7901
AL606517.2	0	0	0	0	0.298507	0	0	0	0.347222	0.0931966	0	0	0	0	0	0.205761
AL606517.1	0.118413	0	0	0	0	0	0.229885	0	1.38889	0.0931966	0	0	0	0	0.212766	0
LINC01359	0.118413	0.118765	0.61553	0	0.746269	1.28041	3.90805	0	0.347222	1.86393	5.11811	1.04167	1.03093	1.36986	0.638298	0.617284
SLC2A3P2	0	0	0.0473485	0	0.149254	0	0.229885	0	0	0	0.393701	0	0	1.36986	0	0
AL357078.3	0.0592066	0	0.0473485	0	0	0	0.689655	0.378788	0.347222	0.465983	0	0	0	0	0.212766	0.205761
RNU6-1176P	0	0	0	0	0.149254	0.128041	0	0	0	0.0931966	0	0	0.257732	0	0	0
MIR3671	0	0	0.142045	0	0	0	0	0	0	0	0	0	0.257732	0	0	0
MIR101-1	0	0	0	0	0	0	0	0	0	0	0	0	0	0	0	0
AL357078.1	0.71048	0.712589	0.0473485	0	0.746269	0.640205	1.14943	0.378788	1.04167	0.186393	1.9685	0	0.257732	0	0.212766	0.205761
AL357078.2	0	0	0	0	0	0	0	0	0	0	0	0	0	0	0	0
MRPS21P1	0	0	0	0	0	0	0	0	0	0	0	0	0	0	0	0
AK4	0.651273	0.118765	1.13636	0	9.70149	19.2061	14.023	1.89394	0.694444	4.56664	10.2362	0	1.28866	2.73973	0.425532	0.617284
RPS29P7	0	0	0	0	0	0	0	0	0	0.0931966	0	0	0	0	0	0
DNAJC6	0.828893	1.18765	0.094697	25.5814	48.0597	1.92061	8.50575	0.378788	1.38889	1.21156	60.2362	0	0.257732	0	0.212766	1.02881
AL139294.1	0	0	0	0	0	0	0	0	0	0	0	0	0	0	0	0
COX6CP13	0	0	0	1.16279	0.895522	0	0.45977	0	0	0.0931966	0.393701	0	0	0	0	0
RNU2-15P	0	0	0	0	0	0	0	0	0	0	0.393701	0	0	0	0	0
LEPROT	20.4263	16.2708	34.8958	50	83.7313	56.7222	77.0115	36.7424	14.9306	59.6459	93.3071	6.25	23.7113	20.5479	18.2979	40.9465
LEPR	1.24334	0.831354	3.26705	3.48837	32.9851	8.57875	6.66667	1.13636	0.347222	6.71016	30.315	0	1.03093	0	1.48936	2.26337
AC119800.1	0.118413	0	0.142045	1.16279	0.149254	0.384123	0.229885	0	0	0.27959	1.1811	0	0	0	0.212766	0.205761
AC097063.1	0	0	0	0	0.298507	0	0.229885	0	0.347222	0	0.787402	0	0	0	0	0
AL513493.1	0	0	0	0	0	0	0.45977	0	0	0.0931966	0.393701	0	0	0	0	1.02881
RN7SL854P	0	0	0	0	0	0	0	0	0	0	0	0	0	0	0	0
PDE4B	27.8863	22.9216	5.44508	0	0.298507	23.3035	12.8736	13.6364	42.7083	20.876	5.11811	44.7917	13.6598	12.3288	8.29787	49.7942
AL590783.1	0	0	0	0	0	0	0	0	0	0	0	0	0	0	0	0
RNU4-88P	0	0	0	0	0	0	0	0	0	0	0	0	0	0	0	0
SGIP1	0	0	0	3.48837	0.746269	0.384123	4.82759	0.378788	0	0.55918	1.5748	0	0	0	0	0
MIR3117	0	0	0	0	0	0	0	0	0	0	0	0	0	0	0	0
AL139147.1	0	0.118765	0.0473485	0	0.298507	0.128041	0.229885	0	0.347222	0.0931966	0	0	0	0	0.212766	0
TCTEX1D1	0.0592066	0	1.98864	0	6.71642	8.83483	37.4713	0.378788	0	3.91426	23.622	0	0	0	0.212766	0
INSL5	0	0	0	0	0	0	0	0	0	0	0	0	0	0	0	0
WDR78	1.24334	0.23753	0.0473485	0	5.67164	1.40845	1.37931	0.378788	0	0.931966	5.11811	0	0	0	0.851064	1.02881
AL592161.1	0	0	0	0	0	0	0	0	0	0	0	0	0	0	0	0
MIER1	42.0367	39.5487	67.3769	13.9535	71.0448	66.8374	59.0805	34.0909	28.8194	52.0037	89.3701	26.0417	62.3711	67.1233	42.766	30.6584
SLC35D1	6.39432	5.34442	2.79356	0	18.6567	13.4443	10.5747	1.51515	7.29167	6.15098	45.2756	7.29167	0.515464	4.10959	7.65957	9.87654
C1orf141	0	0	0	0	8.80597	0	1.37931	0	0	0	15.3543	0	0	0	0	0.205761
RF00322	0	0	0	0	0	0	0	0	0	0	0.393701	0	0	0	0	0
AL133320.1	0	0	0.0473485	0	6.71642	0.128041	0.229885	0	0	0.186393	15.3543	0	0.257732	0	0	0
IL23R	1.06572	0.23753	0	0	0	0	0	0	0	0	0	0	0	0	0.212766	0
RNU6-586P	0	0	0	0	0	0	0	0	0	0	0	0	0	0	0	0
RNU4ATAC4P	0	0	0	0	0	0	0	0	0	0	0	0	0	0	0	0
AL389925.1	0.118413	0	0	0	0	0	0	0	0	0	0	0	0	0	0	0
IL12RB2	3.43398	2.73159	0.0473485	0	7.31343	2.1767	21.6092	0	0	1.21156	11.0236	0	0	0	11.4894	0.205761
SERBP1	74.8372	57.3634	48.7689	40.6977	96.7164	92.1895	92.4138	64.0152	72.5694	79.0308	98.8189	59.375	28.866	31.5068	70	81.07
RNU6-387P	0	0	0	0	0	0	0	0	0	0	0.393701	0	0	0	0	0
LINC01702	0	0	0	0	0	0	0	0	0	0	0	0	0	0	0	0
RNU6-1031P	0	0	0	0	0	0	0	0	0	0	0	0	0	0	0	0
AL590559.1	0	0	0	0	0	0	0	0	0	0	0	0	0	0	0	0
RN7SL392P	0	0	0	0	0	0	0	0	0	0	0	0	0	0	0	0
HNRNPCP9	0	0	0	0	0	0	0	0	0	0	0	0	0	0	0	0
GADD45A	9.76909	9.02613	83.4754	68.6047	63.8806	27.4008	36.7816	6.43939	8.68056	19.0121	80.315	2.08333	72.9381	86.3014	8.7234	34.7737
GNG12	0.0592066	0	0	0	0	0	0	0	0	2.14352	0.787402	0	0	0	0	0.205761
RNU7-80P	0	0	0	0	0	0	0	0	0	0	0	0	0	0	0	0
GNG12-AS1	0	0	0.94697	0	0	0	0	0	0	0.27959	0	0	1.80412	1.36986	0	0
AL157407.1	0	0	0	0	0	0	0	0	0	0	0	0	0	0	0	0
DIRAS3	0	0	0.142045	0	0	0.256082	4.36782	0	0	0.0931966	0	0	0	0	0	0
ARL5AP3	0	0	0	0	0	0	0	0	0	0	0	0	0	0	0	0
WLS	0.17762	0	45.8807	0	0.447761	3.96927	0	2.27273	0.694444	6.71016	0.787402	0	56.701	46.5753	0	0.411523
CTBP2P8	0	0	0.662879	0	0	0.128041	0	0	0	0.27959	0	0	2.06186	0	0	0
MIR1262	0	0	0	0	0	0	0	0	0	0	0	0	0	0	0	0
RPS7P4	0.296033	0.118765	0	0	1.04478	0	0.45977	0.378788	0	0.186393	0.787402	0	0	0	0	0.205761
COX6B1P7	0	0	0	0	0	0	0	0	0	0	0	0	0	0	0	0
ELOCP18	0	0	0	0	0	0	0	0	0	0	0	0	0	0	0	0
AL139413.1	0	0	0	0	0	0	0	0	0	0	0	0	0	0	0	0
RPE65	0	0	0.0473485	0	0	0.256082	0	0	0	0	0	0	0	0	0	0
DEPDC1	0.769686	0.118765	2.03598	1.16279	38.209	31.114	5.97701	0.378788	0	1.77074	30.315	0	0.257732	0	3.40426	4.52675
AL138789.1	0	0	0	0	0.746269	0	0	0	0	0	0	0	0	0	0	0
DEPDC1-AS1	0.0592066	0	0.0473485	0	0.298507	0.384123	0.229885	0	0	0	1.1811	0	0	0	0	0
TXNP2	0	0	0	0	0	0	0	0	0	0	0	0	0	0	0	0
AL035412.1	0	0	0	0	0	0.128041	0	0	0	0	0	0	0	0	0	0
AL033530.1	0	0	0.236742	0	0	0	0	0	0	0	0	0	0	0	0	0
AL691520.1	0	0	0	0	0	0	0	0	0	0	0	0	0	0	0	0
LINC01707	0	0	0	0	0	0	0	0	0	0	0	0	0	0	0	0
AL512271.1	0	0	0	0	0	0	0	0	0	0	0	0	0	0	0	0
LINC01758	0	0	0	0	0	0	0	0	0	0	0	0	0	0	0	0
LRRC7	1.59858	0.593824	0.378788	2.32558	7.16418	1.79257	0.689655	0	1.38889	0.83877	20.4724	1.04167	0	0	0.851064	1.23457
SGO1P1	0	0	0	0	0	0	0	0	0	0	0	0	0	0	0	0
RN7SL538P	0	0	0	0	0	0	0	0	0	0	0	0	0	0	0	0
PIN1P1	0	0	0	0	0.298507	0.128041	0	0	0	0	0.787402	0	0	0	0	0.205761
AL158840.1	0	0	0	0	0	0	0	0	0	0	0.393701	0	0	0	0	0
LRRC40	8.52575	9.61995	5.91856	2.32558	40.597	26.1204	17.7011	4.92424	10.0694	14.6319	50.7874	5.20833	0.773196	1.36986	7.87234	12.1399
RN7SL242P	0.0592066	0	0.189394	0	0.298507	1.02433	0.229885	0	0.694444	0.465983	0.787402	0	0	0	0.212766	0
SRSF11	70.4559	66.6271	45.0284	48.8372	93.4328	82.3303	86.2069	51.8939	65.2778	69.6179	96.063	61.4583	25.2577	32.8767	69.1489	65.0206
AL353771.1	0	0.118765	0	0	0.298507	0	0.229885	0	0	0.186393	0.393701	0	0	0	0	0
ANKRD13C	13.1439	10.3325	2.27273	5.81395	32.0896	20.9987	20.9195	7.95455	11.8056	11.4632	43.7008	7.29167	0.773196	1.36986	10	15.2263
HHLA3	4.4405	2.25653	0.426136	0	15.8209	4.09731	13.7931	3.40909	4.51389	2.8891	23.622	4.16667	0.257732	0	2.76596	11.5226
AL158839.1	0	0	0	0	0	0	0	0	0	0	0	0	0	0	0	0
CTH	1.36175	1.54394	0.331439	2.32558	11.9403	2.43278	2.29885	0.757576	0.694444	1.11836	12.2047	0	0.257732	0	0.425532	14.1975
RF00017-6	0	0	0	0	0.149254	0.256082	0	0	0	0.186393	0	0	0	0	0	0.205761
AL354872.2	0	0	0	0	0.597015	0.128041	0	0	0	0	0.787402	0	0	0	0	0.617284
AL354872.1	0	0.118765	0	0	0	0	0	0	0	0	0	0	0	0	0	0
CASP3P1	0	0	0	0	0	0	0	0	0	0	0	0	0	0	0	0
LINC01788	0	0	0	0	0	0	0	0	0	0	0	0	0	0	0	0
AL513285.1	0	0	0	0	0	0	0	0	0	0	0	0	0	0	0	0
PTGER3	0.118413	0	0.094697	0	7.46269	1.02433	1.37931	0	0.347222	0.372787	27.9528	0	0.257732	0	0	0
AL031429.1	0	0	0	0	0	0.128041	0	0	0	0	0	0	0	0	0	0
AL031429.2	0	0	0	0	0	0	0	0	0	0	1.1811	0	0	0	0	0
ZRANB2-AS1	0.35524	0.475059	0.0473485	0	1.19403	0.128041	0.91954	0.378788	0.347222	0.27959	1.5748	0	0	0	0	1.44033
ZRANB2	54.0557	52.9691	31.0606	18.6047	82.8358	65.8131	82.069	28.4091	59.7222	49.767	96.063	52.0833	10.8247	21.9178	54.8936	75.7202
MIR186	0	0	0	0	0	0	0	0	0	0	0	0	0	1.36986	0	0
ZRANB2-AS2	0.236827	0.23753	0.189394	0	1.49254	0.640205	1.37931	0	0	0.372787	0.787402	0	0	0	0	0.823045
AL358453.1	0	0	0	0	0	0	0.45977	0	0	0.0931966	0	0	0	0	0	0.205761
NEGR1	0	0	0.189394	0	0.746269	15.3649	20.2299	0.378788	0.347222	2.05033	9.44882	0	0.257732	1.36986	0	0
AL354949.1	0	0	0	0	0	0	0	0	0	0	0	0	0	0	0	0
AL359821.1	0	0	0	0	0	0	0	0	0	0	0	0	0	0	0	0
NEGR1-IT1	0	0	0	0	0	0	0	0	0	0	0	0	0	0	0	0
GDI2P2	0	0	0	0	0	0.384123	0.229885	0	0	0.372787	0.393701	0	0	0	0	0
RPL31P12	0	0	0	0	0	0	0	0	0	0	0	0	0	0	0	0
RNU6-1246P	0	0	0	0	0	0	0	0	0	0	0	0	0	0	0	0
AL583808.1	0	0.118765	0	0	0	0	0	0	0	0	0	0	0	0	0	0
AL583808.2	0	0	0	0	0	0	0	0	0	0	0	0	0	0	0	0
AL583808.3	0	0	0	0	0	0	0	0	0	0	0	0	0	0	0	0
AL732618.1	0	0	0	0	0.149254	0	0	0	0	0	0.393701	0	0	0	0	0
KRT8P21	0	0	0	0	0	0	0	0	0	0	0	0	0	0	0	0
RN7SKP19	0	0	0	0	0	0	0	0	0	0	0	0	0	0	0	0
LINC01360	0	0	0	0	0	0	0	0	0	0.0931966	0	0	0	0	0	0
LINC02238	0	0	0	0	0	0	0	0	0	0	0	0	0	0	0	0
RNA5SP50	0	0	0	0	0	0	0	0	0	0	0	0	0	0	0	0
AL591463.1	0	0	0	0	0	0	0	0	0	0	0	0	0	0	0	0
RNU4ATAC8P	0	0	0	0	0	0	0	0	0	0	0	0	0	0	0	0
LRRIQ3	2.36827	1.54394	0.142045	0	5.67164	2.94494	2.75862	0	1.38889	0.27959	6.69291	3.125	0	0	0.212766	3.29218
FPGT	1.89461	1.66271	8.94886	5.81395	17.3134	17.4136	8.27586	5.68182	3.47222	14.0727	19.685	2.08333	3.60825	6.84932	1.48936	4.93827
FPGT-TNNI3K	0.17762	0.23753	0.142045	0	0.746269	0.512164	2.29885	0	0	0.745573	1.9685	0	0	0	0	0
TNNI3K	0.0592066	0	0.0473485	0	0.149254	0.128041	0.45977	0	0	0	0.393701	0	0	0	0	0
AC093158.1	0	0	0	0	0	0	0	0	0	0	0.393701	0	0	0	0	0
AC105271.1	0	0	0	0	0	0	0	0	0	0	0	0	0	0	0	0
LRRC53	0	0	0	0	0	0	0	0	0	0	0	0	0	0	0	0
ERICH3	0	0	0	0	0	0	0	0	0.347222	0	0	0	0	0	0	0
ERICH3-AS1	0	0	0	0	0	0	0	0	0	0	0	0	0	0	0	0
AC135803.1	0	0.356295	0.0473485	0	0	0	0.689655	0	0	0	0	0	0	0	0	0
CRYZ	10.3612	8.66983	0.0473485	0	15.5224	8.57875	18.1609	2.27273	6.59722	6.71016	22.4409	3.125	0	0	8.29787	13.9918
TYW3	15.8674	14.133	1.13636	0	66.2687	43.2778	47.5862	14.3939	15.2778	24.3243	74.8031	9.375	0.515464	0	13.617	30.4527
AC133865.1	0	0	0	0	0	0	0	0	0	0	0	0	0	0	0	0
AC099786.3	0	0	0	0	0	0	0	0	0	0	0	0	0	0	0	0
AC099786.1	0	0	0	0	0	0	0	0	0	0	0	0	0	0	0	0
LHX8	0	0	0	0	0	0	0	0	0	0	0	0	0	0	0	0
AC099786.2	0	0	0	0	0	0	0	0	0	0	0	0	0	0	0	0
RNU6-622P	0	0	0	0	0	0	0	0	0	0	0	0	0	0	0	0
SLC44A5	0	0	0.0473485	0	0.447761	0	0.45977	0	0	0	0	0	0	0	0	0.205761
AC093156.1	0	0	0	0	0	0	0	0	0	0	0	0	0	0	0	0
RNU6-503P	0	0	0	0	0	0	0	0	0	0	0	0	0	0	0	0
AL096829.1	0	0	0	0	0.447761	0.256082	0.45977	0.378788	0	0	0	0	0	0	0	0.205761
AL137803.1	0.0592066	0.118765	0.094697	0	0	0.128041	0.229885	0	0	0	0	0	0	0	0	0
[truncated: 56,872 more rows]

## Sheet: Lung
Supplementary File 9B. The percentage of cells that express a gene per cell type in lung.
Gene symbol	cd8-positive, alpha-beta t cell	cd4-positive, alpha-beta t cell	adventitial cell	alveolar fibroblast	b cell	basal cell	basophil	bronchial smooth muscle cell	bronchial vessel endothelial cell	capillary aerocyte	capillary endothelial cell	classical monocyte	club cell	dendritic cell	endothelial cell of artery	endothelial cell of lymphatic vessel	fibroblast	intermediate monocyte	lung ciliated cell	lung microvascular endothelial cell	macrophage	mesothelial cell	myofibroblast cell	neutrophil	nk cell	non-classical monocyte	pericyte cell	plasma cell	plasmacytoid dendritic cell	pulmonary ionocyte	respiratory goblet cell	respiratory mucous cell	serous cell of epithelium of bronchus	smooth muscle cell	type i pneumocyte	type ii pneumocyte	vascular associated smooth muscle cell	vein endothelial cell
DDX11L1	0	0	0	0	0	0	0	0	0	0	0	0	0	0	0	0	0	0	0	0	0	0	0	0	0	0	0	0	0	0	0	0	0	0	0	0.0113289	0	0
WASH7P	0	0	0	0	0	0	0	0	0	0.188324	0	0	0	0	0	0	0	0	0	0	0	0	0	0	0	0	0	0	0	0	0	0	0	0	0	0	0	0
MIR6859-1	0	0	0	0	0	0	0	0	0	0	0	0	0	0	0	0	0	0	0	0	0	0	0	0	0	0	0	0	0	0	0	0	0	0	0	0	0	0
MIR1302-2HG	0	0	0	0	0	0	0	0	0	0	0	0	0	0	0	0	0	0	0	0	0	0	0	0	0	0	0	0	0	0	0	0	0	0	0	0	0	0
MIR1302-2	0	0	0	0	0	0	0	0	0	0	0	0	0	0	0	0	0	0	0	0	0	0	0	0	0	0	0	0	0	0	0	0	0	0	0	0	0	0
FAM138A	0	0	0	0	0	0	0	0	0	0	0	0	0	0	0	0	0	0	0	0	0	0	0	0	0	0	0	0	0	0	0	0	0	0	0	0	0	0
OR4G4P	0	0	0	0	0	0	0	0	0	0	0	0	0	0	0	0	0	0	0	0	0	0	0	0	0	0	0	0	0	0	0	0	0	0	0	0	0	0
OR4G11P	0	0	0	0	0	0	0	0	0	0	0	0	0	0	0	0	0	0	0	0	0	0	0	0	0	0	0	0	0	0	0	0	0	0	0	0	0	0
OR4F5	0	0	0	0	0	0	0	0	0	0	0	0	0	0	0	0	0	0	0	0	0	0	0	0	0	0	0	0	0	0	0	0	0	0	0	0	0	0
AL627309.1	0.331675	0.152439	0	0.851064	0	0.0486618	0.295421	0	0	0.188324	0	0.143885	0.195503	0	0.621118	0	0	0	0.176367	0.208333	0.324082	0	0	0	0	0.4004	0	0	0	0	0.832178	0	0	0	0	0.532457	0	0.41841
AL627309.3	0	0	0	0	0	0	0	0	0	0	0	0	0	0	0	0	0	0	0	0	0.00830979	0	0	0	0	0	0	0	0	0	0	0	0	0	0	0.0339866	0	0
CICP27	0	0	0	0	0	0	0	0	0	0	0	0	0	0	0	0	0	0	0	0	0	0	0	0	0	0	0	0	0	0	0	0	0	0	0	0.0339866	0	0
AL627309.6	0	0	0	0	0	0.145985	0	0	0	0	0.118624	1.65468	0	0.359712	0	0	0	0.396825	0.881834	0	0.79774	0	0	12.3188	0	0.500501	0	0	0	0	0.277393	12.5	0	0	0.980392	2.48102	0	0
AL627309.7	0	0	0	0	0	0	0	0	0	0	0	0	0	0	0	0	0	0	0	0	0	0	0	0.724638	0	0	0	0	0	0	0	0	0	0	0	0.0113289	0	0
AL627309.2	0	0	0	0	0	0	0	0	0	0	0	0	0	0	0	0	0	0	0	0	0	0	0	0	0	0	0	0	0	0	0	0	0	0	0	0	0	0
AL627309.5	0.331675	0.152439	0	0.425532	0	0.437956	0.14771	0	0	0.188324	0	0.863309	0.0977517	0.359712	0	0	0	0.396825	0.705467	0	0.265913	0	0	6.52174	0.793651	0.3003	0	0	0	0	0	0	0	0	0.490196	2.29976	1.40845	0.209205
RNU6-1100P	0	0	0	0	0	0	0	0	0	0	0	0	0	0	0	0	0	0	0	0	0	0	0	0	0	0	0	0	0	0	0	0	0	0	0	0	0	0
AL627309.4	0	0	0	0	0	0.0973236	0	0	0	0	0	0	0.0977517	0	0	0	0	0	0.176367	0	0	0	0	0	0	0	0	0	0	0	0.138696	0	0	0	0	0.0339866	0	0
FO538757.1	0	0	0	0	0	0	0	0	0	0	0	0	0	0	0	0	0	0	0	0	0	0	0	0	0	0	0	0	0	0	0	0	0	0	0	0	0	0
WASH9P	0	0	0	0	0	0.0486618	0	0	0	0	0	0	0	0	0	0	0	0	0	0	0.0249294	0	0	0	0	0.2002	0	0	0	0	0	0	0	0	0	0.135947	0	0
MIR6859-2	0	0	0	0	0	0	0	0	0	0	0	0	0	0	0	0	0	0	0	0	0	0	0	0	0	0	0	0	0	0	0	0	0	0	0	0	0	0
AP006222.1	0	0.304878	0	0	0	0.924574	0.886263	0	2.12766	0.188324	0.474496	0.503597	0.684262	0.719424	0.621118	0	0	0.793651	1.0582	0.416667	1.1052	0	10	0.724638	0.793651	0.900901	1.02564	2.4	0	0	1.10957	0	7.69231	0	0.490196	2.16382	4.22535	0
RPL23AP24	0	0	0	0	0	0	0	0	0	0	0	0	0	0	0	0	0	0	0	0	0	0	0	0	0	0	0	0	0	0	0	0	0	0	0	0	0	0
AL732372.1	0	0	0	0	0	0	0	0	0	0	0	0	0	0	0	0	0	0	0	0	0	0	0	0	0	0	0	0	0	0	0	0	0	0	0	0	0	0
AL732372.2	0.165837	0.457317	2.7027	2.12766	0	1.07056	0.295421	0	0	0.753296	0.355872	0.57554	1.07527	0.359712	0	0	0	0.396825	1.0582	0.208333	0.440419	0	10	4.34783	2.38095	0.3003	0.512821	0	0	5.26316	1.66436	12.5	0	0	0	1.4501	0	0.209205
WBP1LP7	0	0	0	0	0	0	0	0	0	0	0	0	0	0	0	0	0	0	0	0	0	0	0	0	0	0	0	0	0	0	0	0	0	0	0	0	0	0
OR4F29	0	0	0	0	0	0	0	0	0	0	0	0	0	0	0	0	0	0	0	0	0	0	0	0	0	0	0	0	0	0	0	0	0	0	0	0	0	0
CICP7	0	0	0	0	0	0	0	0	0	0	0	0	0	0	0	0	0	0	0	0	0	0	0	0	0	0	0	0	0	0	0	0	0	0	0	0	0	0
AL732372.3	0	0	0	0	0	0	0	0	0	0	0	0	0	0	0	0	0	0	0	0	0	0	0	0	0	0	0	0	0	0	0	0	0	0	0	0	0	0
RF00026	0	0	0	0	0	0	0	0	0	0	0	0	0	0	0	0	0	0	0	0	0	0	0	0	0	0	0	0	0	0	0	0	0	0	0	0	0	0
AL669831.3	0.165837	0	0	0	0	0.194647	0	0	0	0	0	0	0.195503	0.359712	0	0	0	0	0.176367	0	0.0997175	0	0	0	0	0.2002	0.512821	0	0	0	0.138696	0	0	0	0.490196	0.317209	0	0
AC114498.1	0	0	0	0	0	0	0	0	0	0	0	0	0	0	0	0	0	0	0	0	0	0	0	0	0	0	0	0	0	0	0	0	0	0	0	0	0	0
MTND1P23	57.0481	44.9695	29.7297	48.5106	19.5122	94.1119	32.4963	53.7313	14.8936	53.484	54.6856	74.1727	90.7136	32.0144	42.236	47.2222	77.7778	89.6825	62.0811	89.1667	46.2274	68.75	70	5.7971	55.5556	79.5796	63.0769	58.4	5.88235	100	69.7642	62.5	69.2308	8	35.7843	58.491	40.8451	66.318
MTND2P28	3.64842	4.11585	4.05405	2.55319	2.43902	5.88808	11.5214	4.47761	10.6383	3.01318	2.84698	5.32374	4.98534	11.5108	3.72671	0	0	5.55556	15.1675	3.125	27.2229	18.75	0	7.24638	4.7619	5.50551	2.05128	4	5.88235	10.5263	11.3731	25	7.69231	8	7.84314	14.0252	4.22535	3.76569
MTCO1P12	9.95025	9.14634	6.75676	10.6383	7.31707	31.7762	7.38552	8.95522	4.25532	6.02637	6.52432	42.6619	27.7615	6.47482	8.69565	2.77778	33.3333	53.9683	21.5168	22.9167	20.2759	37.5	0	1.44928	11.9048	36.4364	5.12821	8	0	42.1053	32.1775	12.5	23.0769	0	15.1961	19.2364	7.04225	18.2008
AC114498.2	0	0	0	0	0	0	0	0	0	0	0	0	0	0	0	0	0	0	0	0	0.0166196	0	0	0	0	0	0	0	0	0	0	12.5	0	0	0	0.192591	0	0
MTCO2P12	0.829187	0.304878	0	0.851064	0	1.55718	0.738552	0	0	0.376648	0.474496	0.431655	0.977517	2.8777	1.24224	2.77778	0	0.396825	2.1164	0.625	2.0359	0	0	0	0	0.500501	0	0.8	0	5.26316	1.94175	0	0	0	0.490196	2.0392	0	0.627615
MTATP8P1	0	0	0	0	0	0	0	0	0	0	0	0	0	0	0	0	0	0	0	0	0.00830979	0	0	0	0	0	0	0	0	0	0.138696	0	0	0	0	0.090631	0	0
MTATP6P1	86.2355	87.1951	90.5405	88.5106	95.122	97.4209	93.2053	88.0597	89.3617	70.0565	74.0214	84.964	93.3529	94.964	79.5031	83.3333	100	83.7302	99.4709	94.1667	97.8561	100	90	48.5507	88.0952	92.6927	78.9744	85.6	94.1176	100	98.1969	100	100	84	91.1765	98.1761	90.1408	87.4477
MTCO3P12	0.995025	0.304878	1.35135	1.2766	3.65854	2.62774	0.886263	1.49254	4.25532	0.188324	0.118624	0.791367	0.879765	1.43885	0.621118	0	0	0.793651	1.94004	0.833333	3.16603	0	0	1.44928	1.5873	0.800801	0	0	0	5.26316	3.05132	0	0	0	0	2.96817	0	1.04603
WBP1LP6	0	0	0	0	0	0	0	0	0	0	0	0	0	0	0	0	0	0	0	0	0	0	0	0	0	0	0	0	0	0	0	0	0	0	0	0	0	0
OR4F16	0	0	0	0	0	0	0	0	0	0	0	0	0	0	0	0	0	0	0	0	0	0	0	0	0	0	0	0	0	0	0	0	0	0	0	0	0	0
CICP3	0	0	0	0	0	0	0	0	0	0	0	0	0	0	0	0	0	0	0	0	0	0	0	0	0	0	0	0	0	0	0	0	0	0	0	0	0	0
AL669831.1	0.497512	1.98171	1.35135	0.851064	0	1.16788	1.03397	2.98507	0	0.564972	0.118624	0.863309	1.75953	1.43885	0	0	0	0.793651	1.5873	0.416667	1.12182	6.25	0	1.44928	3.1746	0.800801	0	0.8	0	5.26316	1.66436	0	0	0	0.980392	3.03614	2.8169	1.04603
RNU6-1199P	0	0	0	0	0	0	0	0	0	0	0	0	0	0	0	0	0	0	0	0	0.00830979	0	0	0	0	0	0	0	0	0	0.138696	0	0	0	0	0	0	0
AL669831.2	0	0	0	0	0	0.145985	0	0	0	0	0	0	0.0977517	0	0	0	0	0	0.176367	0	0.0249294	0	0	0	0	0	0	0	0	0	0.138696	0	0	0	0	0.0339866	0	0
AL669831.5	2.32172	1.52439	0	0.425532	1.21951	1.99513	0.295421	1.49254	4.25532	0.564972	0.355872	0.503597	1.07527	3.95683	0	0	0	1.19048	1.94004	0.208333	0.847598	0	0	0.724638	2.38095	1.6016	1.53846	0	0	0	2.35784	0	0	0	0	3.11544	1.40845	0.83682
AL669831.7	0	0	0	0	0	0	0	0	0	0	0	0	0	0	0	0	0	0	0	0	0	0	0	0	0	0	0	0	0	0	0	0	0	0	0	0	0	0
AL669831.4	0.331675	1.06707	1.35135	0.425532	0	0.486618	0.295421	0	0	0.564972	0.118624	0.359712	0.0977517	0.359712	0	0	22.2222	0.396825	1.76367	0.208333	0.465348	0	0	0.724638	0	0.600601	0	0	0	0	1.10957	0	0	0	0.490196	0.827008	0	0.41841
FAM87B	0	0.152439	0	0	0	0	0	1.49254	0	0	0	0.0719424	0	0	0	0	0	0.396825	0	0	0.307462	0	0	0	0	0.3003	0	0	0	0	0	0	0	0	0	0.135947	0	0
LINC01128	2.6534	3.65854	10.8108	5.53191	1.21951	5.06083	3.54505	1.49254	12.766	6.21469	4.03321	2.66187	3.12805	45.3237	5.59006	16.6667	0	1.19048	5.64374	4.58333	10.6864	31.25	20	0	3.1746	4.4044	5.64103	8.8	0	15.7895	8.18308	0	7.69231	8	6.37255	14.9201	2.8169	4.1841
LINC00115	2.32172	1.82927	0	1.70213	0	2.33577	0.590842	0	2.12766	1.88324	1.66074	1.15108	1.07527	2.8777	0.621118	2.77778	0	0	1.76367	1.45833	1.52069	0	10	0.724638	3.1746	2.6026	1.02564	0.8	0	0	1.94175	12.5	0	0	0.980392	2.02787	0	1.46444
FAM41C	0	0	0	0.425532	0	2.57908	0	0	0	0.188324	0.118624	0.0719424	0.58651	0	0	0	0	0.396825	0.705467	0	0.274223	0	0	0	0	0.4004	0	0	0	0	0.416089	0	0	0	0	0.521128	0	0.209205
TUBB8P11	0	0	0	0	0	0	0	0	0	0	0	0	0	0	0	0	0	0	0	0	0.00830979	0	0	0	0	0	0	0	0	0	0	0	0	0	0	0	0	0
AL669831.6	0	0	0	0	0	0	0	0	0	0	0	0	0	0	0	0	0	0	0	0	0	0	0	0	0	0	0	0	0	0	0	0	0	0	0	0	0	0
AL645608.6	0	0	0	0	0	0	0	0	0	0	0	0	0	0	0	0	0	0	0	0	0	0	0	0	0	0	0	0	0	0	0	0	0	0	0	0	0	0
AL645608.2	0	0.152439	2.7027	0	0	0.0486618	0	0	0	0	0	0.143885	0	0.359712	0	0	0	0	0	0	0.0249294	0	0	0	0	0.1001	0	0	0	0	0	0	0	0	0.490196	0.0793021	0	0.41841
AL645608.4	0	0	0	0	0	0	0	0	0	0	0	0.0719424	0	0	0	0	0	0	0	0	0	0	0	0	0	0.1001	0	0	0	0	0	0	0	0	0	0	0	0
LINC02593	0	0	8.10811	2.12766	0	0.194647	0	1.49254	0	0	0	0	2.44379	0	0	0	0	0	0.176367	0.416667	0.00830979	6.25	10	0	0	0	0	0	0	0	0	0	0	0	0	0.0339866	1.40845	1.25523
SAMD11	0.165837	0	28.3784	5.53191	0	0.291971	0.295421	0	0	0.188324	0	0.0719424	2.73705	0	4.34783	0	11.1111	0	0.705467	2.29167	0.0830979	12.5	0	0	0.793651	0	0.512821	2.4	0	0	0.277393	0	0	4	0.490196	0.20392	1.40845	5.85774
NOC2L	13.7645	12.0427	27.027	13.617	13.4146	27.9319	11.8168	14.9254	36.1702	11.6761	10.6762	10.8633	21.0166	26.259	13.0435	27.7778	0	12.3016	30.6878	15.625	29.6909	56.25	20	1.44928	23.0159	13.4134	14.8718	12.8	5.88235	10.5263	29.2649	50	15.3846	40	23.0392	42.8345	16.9014	17.1548
KLHL17	1.49254	1.21951	1.35135	1.2766	1.21951	1.07056	0.590842	5.97015	4.25532	1.12994	1.66074	1.43885	1.46628	1.43885	0.621118	0	0	1.19048	2.29277	0.625	2.48463	6.25	0	0	0	1.3013	1.53846	1.6	0	5.26316	2.49653	0	0	4	2.45098	3.96511	1.40845	0.41841
PLEKHN1	1.49254	1.37195	0	0	0	2.33577	0.14771	0	2.12766	0	0.237248	0.719424	1.07527	1.07914	0.621118	5.55556	0	0.396825	1.0582	0.208333	0.332392	6.25	0	0	0	0.1001	0.512821	1.6	0	0	6.51872	12.5	0	4	2.94118	4.237	0	0
PERM1	0	0	0	0	0	2.09246	0	0	0	0	0.118624	0.0719424	1.36852	0	0	0	0	0	1.0582	0	0	0	0	0	0	0	0.512821	0	0	0	3.05132	0	0	0	0	0.215249	0	0.41841
AL645608.7	0.331675	0	0	2.97872	0	5.49878	0.295421	7.46269	0	0.188324	0.830368	0.719424	2.54154	0.359712	2.48447	2.77778	0	0	3.88007	0	0.141266	0	10	0	0.793651	1.5015	6.66667	0.8	0	0	19.4175	25	0	8	3.43137	1.47275	11.2676	0.41841
HES4	2.98507	2.59146	20.2703	22.9787	3.65854	63.1144	6.20384	86.5672	40.4255	7.15631	13.4045	4.89209	46.0411	7.19424	34.1615	44.4444	33.3333	11.5079	46.9136	6.04167	3.59814	12.5	40	2.89855	7.93651	19.019	92.3077	4.8	0	15.7895	85.7143	100	15.3846	68	47.0588	25.5353	87.3239	8.159
ISG15	21.2272	14.3293	27.027	12.3404	15.8537	11.8248	24.8154	31.3433	63.8298	25.0471	27.0463	11.1511	8.5044	52.8777	39.1304	13.8889	0	6.34921	33.157	23.75	75.4529	56.25	30	2.89855	20.6349	15.9159	19.4872	20	17.6471	15.7895	26.6297	25	15.3846	36	31.3725	27.2006	38.0282	24.477
AL645608.3	0	0	0	0	0	0.194647	0	0	0	0	0	0	0	0	0	0	0	0	0	0	0.0166196	0	0	0	0	0	0	0	0	0	0.138696	0	0	0	0	0.0226578	0	0
AL645608.1	0	0	0	0	0	0	0	0	0	0	0	0	0	0	0	0	0	0	0	0	0	0	0	0	0	0	0	0	0	0	0	0	0	0	0	0	1.40845	0
AGRN	0.331675	0.609756	4.05405	2.12766	1.21951	21.1192	1.32939	2.98507	8.51064	3.01318	3.32147	0.431655	17.5953	4.31655	12.4224	8.33333	0	0.396825	25.0441	13.5417	9.04105	50	20	0.724638	1.5873	1.6016	9.23077	4	0	5.26316	33.5645	50	7.69231	0	49.0196	33.1823	4.22535	13.8075
AL645608.5	0	0	0	0	0	0	0	0	0	0	0	0	0	0	0	0	0	0	0	0	0	0	0	0	0	0	0	0	0	0	0	0	0	0	0	0	0	0
AL390719.1	0.331675	0.457317	0	0	0	0.145985	2.06795	0	0	0.188324	0	0.143885	0.195503	7.55396	0	0	0	0	0.705467	0.208333	0.939006	0	10	0	0	0.2002	0	0.8	0	5.26316	0.554785	0	15.3846	0	2.45098	0.453155	0	0
AL645608.8	0	0	0	0	0	0	0	0	0	0	0	0	0	0	0	0	0	0	0	0	0	0	0	0	0	0	0	0	0	0	0	0	0	0	0	0	0	0
RNF223	0	0	0	0	0	1.21655	0	0	0	0	0.118624	0	4.10557	0	0	0	0	0	2.82187	0.208333	0	0	0	0.724638	0	0	0	0	0	0	4.43828	25	0	0	4.90196	3.55727	0	0
C1orf159	2.6534	1.98171	4.05405	0.425532	0	5.45012	1.92024	2.98507	6.38298	3.20151	2.4911	3.52518	4.30108	3.59712	1.86335	0	11.1111	2.77778	9.70018	2.5	3.98039	0	0	0.724638	2.38095	3.5035	4.61538	4	0	5.26316	7.07351	25	0	8	3.92157	11.0003	1.40845	3.9749
AL390719.3	0	0	0	0	0	0.0486618	0.14771	0	0	0	0.118624	0	0.195503	0	0	0	0	0	0	0	0.0249294	0	0	0	0	0.1001	0	0	0	0	0	0	0	0	0	0.10196	0	0
LINC01342	0	0	0	0	0	0.0486618	0	0	0	0	0	0	0.0977517	0	0	0	0	0	0.176367	0	0	0	0	0	0	0	0	0	0	0	0.277393	0	0	0	0	0.0793021	0	0
MIR200B	0	0	0	0	0	0	0	0	0	0	0	0	0	0	0	0	0	0	0	0	0	0	0	0	0	0	0	0	0	0	0	0	0	0	0	0	0	0
MIR200A	0	0	0	0	0	0	0	0	0	0	0	0	0	0	0	0	0	0	0	0	0	0	0	0	0	0	0	0	0	0	0	0	0	0	0	0	0	0
MIR429	0	0	0	0	0	0	0	0	0	0	0	0	0	0	0	0	0	0	0	0	0	0	0	0	0	0	0	0	0	0	0	0	0	0	0	0	0	0
AL390719.2	0.165837	0.152439	0	0.425532	0	10.5596	0.295421	0	0	0.188324	0.355872	0.143885	4.69208	0	0	0	0	0	17.6367	0	0.141266	0	0	0	0.793651	0.3003	0	0.8	0	10.5263	23.8558	12.5	15.3846	0	1.96078	3.70454	0	0.41841
TTLL10-AS1	0	0	0	0	0	0.0486618	0	0	0	0	0	0	0.0977517	0	0	0	0	0	3.1746	0	0	0	0	0	0	0	0	0	0	0	0.277393	0	0	0	0	0.0339866	0	0
TTLL10	0.165837	0.457317	0	0	0	1.07056	0.443131	0	0	2.63653	3.91459	0.143885	1.27077	0	2.48447	0	0	0	87.1252	1.45833	0.290843	0	0	0	1.5873	0.3003	0	0	0	5.26316	2.91262	0	0	0	0.490196	1.37079	0	1.25523
TNFRSF18	11.9403	10.5183	0	0	0	11.9221	7.0901	0	0	0.188324	0.59312	0.57554	1.46628	8.27338	0.621118	0	0	0	1.41093	0.833333	0.465348	6.25	0	0	42.0635	0.900901	1.02564	54.4	0	0	6.24133	0	0	0	0	0.691062	0	0.627615
TNFRSF4	8.45771	11.7378	0	5.10638	0	1.55718	21.418	1.49254	12.766	14.6893	11.7438	0.935252	0.977517	6.83453	10.559	19.4444	0	0.793651	0.705467	3.95833	0.855908	12.5	10	0	18.254	1.5015	1.02564	36.8	0	5.26316	1.66436	0	0	0	0.490196	0.928968	1.40845	3.76569
SDF4	26.534	22.8659	58.1081	37.4468	10.9756	43.3577	27.9173	32.8358	65.9574	31.6384	30.8422	25.3957	33.0401	46.4029	34.7826	41.6667	44.4444	22.619	40.9171	29.7917	65.3731	68.75	40	6.52174	39.6825	28.5285	29.7436	54.4	17.6471	57.8947	52.2885	62.5	61.5385	44	39.7059	66.9877	38.0282	38.4937
B3GALT6	6.46766	5.33537	14.8649	6.80851	2.43902	10.2676	10.0443	7.46269	46.8085	4.33145	5.57533	5.97122	7.91789	16.5468	8.07453	2.77778	33.3333	6.74603	16.2257	10.4167	21.5888	31.25	40	2.89855	6.34921	9.60961	8.20513	11.2	5.88235	10.5263	15.8114	25	7.69231	32	9.31373	27.5971	9.85915	9.20502
C1QTNF12	0.165837	0.152439	1.35135	0.425532	1.21951	0.875912	0.14771	2.98507	2.12766	0.753296	1.66074	0.57554	0.684262	0.719424	4.34783	0	0	0.396825	1.0582	0.833333	0.365631	0	0	0	0	0	0	0.8	0	0	0.416089	0	0	0	0.980392	0.827008	0	1.25523
AL162741.1	0.165837	0.152439	0	0	0	0.145985	0	0	0	0.376648	0.118624	0.0719424	0.195503	0	0	0	0	0	0	0.208333	0.149576	0	0	0	0	0.2002	0	0	0	0	0.138696	0	0	0	0	0.294551	0	0
UBE2J2	18.5738	16.0061	29.7297	17.8723	8.53659	30.2676	15.805	35.8209	40.4255	15.6309	16.0142	19.8561	26.393	28.0576	22.9814	8.33333	22.2222	21.0317	40.2116	21.4583	36.3387	56.25	40	6.52174	23.8095	16.9169	25.641	27.2	17.6471	47.3684	39.9445	62.5	46.1538	16	34.3137	50.81	11.2676	20.2929
LINC01786	0	0	0	0	0	0.194647	0.14771	0	0	0	0.118624	0.0719424	0.0977517	0.719424	0.621118	0	0	0	0	0	0.116337	0	0	0	0.793651	0.1001	0	0	0	0	0.138696	12.5	0	0	0	0.147275	0	0
SCNN1D	0.165837	0.304878	0	1.2766	0	0.827251	0.14771	1.49254	0	0	0.237248	0.0719424	1.46628	0.719424	0	0	11.1111	0.396825	2.29277	0.833333	0.855908	0	0	0	0.793651	0.4004	0	0	5.88235	0	0.970874	0	0	0	0.490196	1.0989	1.40845	0.83682
ACAP3	5.80431	4.11585	10.8108	7.23404	2.43902	11.9221	4.57903	5.97015	10.6383	4.33145	4.62633	8.1295	6.64712	11.1511	4.96894	0	11.1111	6.34921	8.99471	3.95833	10.2792	31.25	20	1.44928	4.7619	7.60761	4.61538	14.4	5.88235	10.5263	13.0374	12.5	15.3846	16	13.7255	21.4342	8.4507	5.02092
MIR6726	0	0	0	0	0	0	0	0	0	0	0	0	0	0	0	0	0	0	0	0	0	0	0	0	0	0	0	0	0	0	0	0	0	0	0	0	0	0
PUSL1	5.3068	3.81098	20.2703	3.40426	4.87805	9.82968	5.16987	7.46269	17.0213	1.69492	3.20285	4.96403	5.18084	8.99281	3.72671	11.1111	0	5.15873	14.6384	4.375	13.3788	50	20	0.724638	0.793651	5.10511	5.12821	10.4	17.6471	10.5263	14.4244	25	7.69231	8	10.2941	26.0564	5.6338	3.13808
INTS11	11.6086	10.3659	18.9189	18.7234	10.9756	26.618	15.2142	16.4179	44.6809	9.4162	10.6762	14.6763	19.0616	27.6978	18.6335	13.8889	11.1111	9.52381	46.0317	18.9583	32.5744	56.25	20	2.89855	10.3175	12.7127	16.4103	18.4	29.4118	0	34.6741	25	7.69231	32	36.7647	45.678	16.9014	17.364
MIR6727	0	0	0	0	0	0	0	0	0	0	0	0	0	0	0	0	0	0	0	0	0	0	0	0	0	0	0	0	0	0	0	0	0	0	0	0	0	0
AL139287.1	0.165837	0	0	0.425532	0	0	0	0	0	0	0.118624	0	0	0	0	0	0	0	0	0	0.0166196	0	0	0	0	0.1001	0	0	0	0	0	0	0	0	0	0.0453155	0	0
CPTP	3.9801	3.81098	10.8108	4.25532	6.09756	10.073	4.2836	5.97015	17.0213	11.1111	5.69395	2.66187	5.96285	6.47482	8.07453	5.55556	11.1111	1.98413	11.8166	15.625	10.6864	25	20	0.724638	1.5873	3.9039	3.58974	15.2	5.88235	15.7895	14.4244	25	38.4615	0	16.1765	17.4351	0	8.3682
TAS1R3	0.331675	0.152439	0	0	0	0.0486618	0	0	0	0.188324	0	0	0.195503	0	0.621118	0	11.1111	0	0	0	0.224364	0	0	0	0	0.3003	0	9.6	0	0	0.416089	0	0	0	0	0.20392	0	0
DVL1	3.9801	2.59146	6.75676	5.95745	4.87805	12.0195	3.84047	7.46269	29.7872	4.33145	6.28707	3.23741	10.2639	8.27338	6.8323	19.4444	22.2222	4.7619	19.0476	7.5	9.43992	25	20	2.17391	3.1746	2.8028	4.61538	6.4	17.6471	15.7895	19.2788	37.5	30.7692	8	22.549	31.6076	11.2676	11.0879
MIR6808	0	0	0	0	0	0	0	0	0	0	0	0	0	0	0	0	0	0	0	0	0	0	0	0	0	0	0	0	0	0	0	0	0	0	0	0	0	0
MXRA8	0.165837	0.152439	70.2703	47.6596	0	0.389294	0.14771	23.8806	0	0	0.237248	0.143885	1.27077	0	0.621118	0	33.3333	0	0.176367	0.208333	0.124647	12.5	20	0	0	0	22.5641	0	0	0	0.277393	0	0	12	17.6471	1.48408	53.5211	0.41841
AURKAIP1	45.937	33.5366	64.8649	34.4681	29.2683	73.674	50.0739	61.194	87.234	44.4444	37.841	51.5108	61.4858	73.0216	41.6149	44.4444	88.8889	52.7778	86.4198	54.7917	83.9953	100	50	28.9855	36.5079	54.3544	37.4359	79.2	58.8235	94.7368	84.0499	100	100	84	81.3725	89.9739	49.2958	49.7908
NDUFB4P8	0	0	0	0	0	0.0973236	0	0	0	0	0	0	0	0	0	0	0	0	0	0	0.0166196	0	0	0	0	0	0	0	0	0	0	0	0	0	0	0.0226578	0	0
CCNL2	17.5788	17.6829	24.3243	17.0213	15.8537	31.3382	16.2482	23.8806	29.7872	22.7872	21.1151	14.7482	31.085	20.1439	18.6335	36.1111	33.3333	15.873	39.6825	23.3333	31.5938	37.5	40	8.69565	18.254	18.9189	21.0256	29.6	29.4118	47.3684	36.4771	37.5	38.4615	16	41.6667	50.1643	15.493	28.8703
MRPL20-AS1	4.97512	4.72561	1.35135	2.97872	4.87805	7.68856	4.2836	5.97015	12.766	3.76648	4.98221	3.02158	4.59433	7.55396	2.48447	11.1111	11.1111	3.96825	16.0494	4.58333	6.81403	25	10	0.724638	4.7619	2.9029	3.07692	8	17.6471	5.26316	9.01526	12.5	23.0769	4	5.39216	12.5864	1.40845	7.74059
MRPL20	43.2836	38.2622	62.1622	39.5745	36.5854	75.7178	47.8582	58.209	89.3617	41.2429	43.535	50.5036	62.9521	70.1439	54.6584	44.4444	100	51.9841	81.1287	56.4583	79.9235	100	80	13.0435	36.5079	52.8529	48.7179	70.4	29.4118	73.6842	83.9112	87.5	100	76	64.2157	89.838	53.5211	46.8619
RN7SL657P	0	0	0	0	0	0	0	0	0	0	0	0	0	0	0	0	0	0	0	0	0	0	0	0	0	0	0	0	0	0	0	0	0	0	0	0	0	0
AL391244.2	0.497512	0	0	0.425532	0	1.55718	0	0	0	0.376648	0.118624	0.143885	0.488759	0	0.621118	0	0	0.396825	1.23457	0.208333	0.315772	0	0	0.724638	0	0.1001	0.512821	0	0	0	0.832178	0	0	0	0	0.815679	0	0.41841
ANKRD65	0.331675	1.06707	9.45946	5.95745	0	28.9538	0.14771	0	4.25532	1.31827	1.06762	0.431655	17.2043	7.55396	2.48447	2.77778	0	0.396825	53.0864	7.08333	0.939006	6.25	0	0	0	0.500501	3.58974	2.4	5.88235	36.8421	32.7323	75	7.69231	0	24.0196	35.482	2.8169	4.39331
AL391244.1	0	0	0	0	0	0	0	0	0	0	0	0	0.0977517	0	0	0	0	0	0	0	0	0	0	0	0	0	0	0	0	0	0	0	0	0	0	0.0226578	0	0
TMEM88B	0	0	0	0	0	0	0	0	0	0	0	0	0	0	0	0	0	0	0	0	0	0	0	0	0	0	0	0	0	0	0	0	0	0	0	0.0113289	0	0
LINC01770	0	0	0	0	0	0.583942	0	0	4.25532	0	0	0	0.782014	0	0.621118	0	0	0	1.5873	0	0.00830979	0	0	0	0	0	0	0	0	5.26316	1.52566	0	0	0	0	2.23179	2.8169	0
VWA1	1.16086	1.06707	10.8108	8.08511	1.21951	17.1776	0.443131	19.403	78.7234	3.76648	3.67734	0.647482	12.4145	1.79856	9.93789	2.77778	0	0.793651	18.8713	37.0833	0.465348	0	30	2.89855	1.5873	0.600601	7.69231	3.2	0	36.8421	32.3162	75	46.1538	12	43.1373	61.833	19.7183	26.569
ATAD3C	1.16086	1.52439	2.7027	0	0	9.48905	0.590842	0	8.51064	0	0.355872	0.359712	7.62463	0.719424	0.621118	2.77778	11.1111	0.793651	4.93827	2.08333	0.897457	12.5	0	2.89855	1.5873	0.500501	0.512821	16	0	21.0526	10.1248	12.5	7.69231	0	14.7059	40.6254	0	1.67364
ATAD3B	1.65837	3.35366	9.45946	0.851064	6.09756	5.83942	3.84047	1.49254	19.1489	3.38983	2.13523	3.59712	6.54936	10.7914	3.72671	5.55556	11.1111	3.1746	10.0529	4.16667	9.06598	18.75	0	0.724638	1.5873	4.5045	3.07692	4.8	5.88235	15.7895	8.46047	25	7.69231	12	10.2941	26.7135	5.6338	5.02092
AL645728.2	0.165837	0.457317	0	0	0	0.194647	0.443131	0	0	0.188324	0.118624	0.143885	0.488759	0	0	0	0	0.396825	1.41093	0.208333	0.77281	0	0	0	0	0	0	1.6	0	0	0.138696	0	0	0	1.47059	3.16076	1.40845	0
ATAD3A	3.31675	3.04878	13.5135	2.12766	1.21951	7.20195	3.24963	4.47761	27.6596	1.69492	2.01661	3.45324	6.25611	6.83453	4.96894	2.77778	11.1111	4.36508	22.3986	3.54167	11.6919	25	0	0.724638	1.5873	4.4044	4.10256	8	11.7647	15.7895	14.0083	12.5	15.3846	32	15.1961	34.0773	2.8169	5.43933
TMEM240	0	0.152439	5.40541	1.70213	0	0.827251	0.295421	4.47761	0	0.753296	1.30486	0	1.36852	0.359712	1.86335	2.77778	0	0	0.529101	1.875	0.39887	6.25	0	0	0.793651	0	4.61538	0	0	0	0.277393	0	0	8	0.490196	0.838337	2.8169	1.46444
SSU72	44.1128	41.9207	52.7027	35.7447	36.5854	69.8297	46.0857	37.3134	68.0851	34.0866	37.6038	52.0144	59.042	70.5036	44.7205	47.2222	11.1111	55.9524	75.8377	46.4583	83.7377	81.25	70	37.6812	42.8571	59.1592	36.9231	51.2	23.5294	78.9474	80.7212	75	76.9231	56	60.2941	89.079	42.2535	44.1423
AL645728.1	4.31177	3.96341	2.7027	2.55319	0	4.47689	2.06795	2.98507	4.25532	1.31827	0.948992	3.45324	2.93255	2.8777	1.86335	0	0	4.7619	7.76014	2.70833	5.48446	0	10	4.34783	3.96825	4.3043	2.5641	2.4	11.7647	0	2.91262	0	7.69231	4	3.43137	5.29059	1.40845	3.34728
AL691432.3	0	0	0	0	0	0	0	0	0	0	0	0	0	0	0	0	0	0	0	0	0	0	0	0	0	0	0	0	0	0	0	0	0	0	0	0	0	0
FNDC10	1.49254	1.67683	2.7027	1.2766	0	3.60097	2.06795	0	2.12766	0.188324	0	3.88489	3.32356	4.67626	0	0	11.1111	5.15873	2.6455	0.625	10.0632	12.5	0	0	0.793651	3.6036	0.512821	0	0	21.0526	4.57698	12.5	0	4	8.82353	19.9388	0	0.41841
AL691432.2	1.16086	1.52439	2.7027	3.82979	1.21951	8.71046	2.36337	5.97015	8.51064	1.69492	2.13523	2.58993	7.62463	3.23741	1.86335	0	0	3.96825	13.5802	1.45833	3.39039	12.5	0	0.724638	0.793651	2.9029	1.53846	0.8	0	5.26316	10.8183	12.5	0	0	2.94118	11.1929	8.4507	2.92887
MIB2	13.1012	11.7378	16.2162	6.80851	8.53659	26.0827	10.0443	8.95522	17.0213	6.21469	6.04982	7.05036	15.4448	6.83453	6.21118	5.55556	22.2222	6.34921	33.3333	7.5	17.168	43.75	10	1.44928	25.3968	6.90691	9.23077	13.6	23.5294	15.7895	21.7753	37.5	23.0769	12	18.6275	25.7845	11.2676	8.78661
MMP23B	0.331675	0.457317	10.8108	3.82979	0	0.0973236	0	0	0	0	0.237248	0.0719424	0	0	0	0	0	0	0.352734	0	0.0747881	6.25	0	0	1.5873	0.1001	0.512821	0	0	0	0	0	0	4	1.96078	0.793021	1.40845	0
CDK11B	15.5887	10.8232	6.75676	8.51064	6.09756	17.129	9.30576	13.4328	31.9149	5.27307	9.13405	8.77698	17.6931	14.3885	8.07453	8.33333	22.2222	9.12698	23.6332	11.4583	13.9189	25	30	6.52174	20.6349	10.2102	7.17949	10.4	17.6471	5.26316	20.527	37.5	15.3846	16	12.7451	32.3326	7.04225	11.2971
FO704657.1	0.331675	0.914634	0	0	1.21951	0.389294	0	0	2.12766	0	0.237248	0.143885	0.391007	0	0	0	0	0	1.0582	0.208333	0.38225	0	0	0	0	0.4004	0	0.8	0	0	0.554785	0	0	0	0	1.11023	0	0
SLC35E2B	8.78939	6.70732	6.75676	4.68085	2.43902	11.1922	3.24963	2.98507	8.51064	2.82486	3.32147	4.31655	10.3617	2.8777	3.10559	8.33333	11.1111	5.55556	16.7549	5	4.91109	6.25	0	1.44928	5.55556	6.40641	8.20513	6.4	5.88235	15.7895	12.0666	0	7.69231	0	16.6667	15.0108	2.8169	5.85774
AL691432.1	0.165837	0.914634	1.35135	0.851064	0	1.31387	0.295421	0	0	0.188324	0.711744	0.0719424	0.684262	0.359712	0	0	0	0.396825	1.0582	0.416667	0.207745	0	0	0	2.38095	0.600601	0.512821	0	0	0	1.52566	0	0	0	0	0.498471	0	0.627615
MMP23A	0	0	0	0	0	0	0	0	0	0	0	0	0	0	0	0	0	0	0	0	0	0	0	0	0	0	0	0	0	0	0	0	0	0	0	0	0	0
CDK11A	11.2769	7.92683	1.35135	4.68085	4.87805	11.1922	4.43131	2.98507	14.8936	6.21469	8.06643	5.61151	7.72239	1.43885	6.21118	2.77778	22.2222	5.95238	7.23104	7.29167	4.26292	6.25	30	8.69565	14.2857	6.40641	9.23077	5.6	0	0	9.15395	25	23.0769	8	4.41176	15.8944	7.04225	7.32218
AL031282.2	1.99005	2.13415	0	1.2766	0	2.53041	0.443131	1.49254	2.12766	0.94162	1.18624	0.791367	1.66178	0	0.621118	0	11.1111	0.396825	2.46914	0.625	0.432109	0	0	0	5.55556	0.500501	2.05128	4	0	0	3.8835	12.5	0	0	1.96078	1.9599	1.40845	0.41841
AL031282.1	1.16086	1.98171	0	0	0	1.94647	0.295421	1.49254	0	1.12994	1.06762	0.28777	1.07527	0	0	0	0	0.396825	2.6455	0.625	0.299152	0	10	0	0.793651	0.500501	1.02564	0	0	0	1.66436	0	0	0	0.980392	1.34814	0	0.41841
SLC35E2A	2.6534	2.13415	2.7027	1.70213	1.21951	4.67153	0.886263	1.49254	4.25532	1.31827	0.830368	1.51079	3.42131	1.43885	1.24224	0	11.1111	1.19048	5.64374	1.875	1.62872	0	0	0.724638	3.1746	1.8018	2.5641	0.8	0	5.26316	3.7448	25	7.69231	0	2.94118	6.95593	2.8169	1.67364
NADK	8.62355	5.18293	16.2162	11.9149	4.87805	15.6691	7.23781	13.4328	42.5532	4.7081	7.35469	32.7338	16.4223	14.7482	12.4224	5.55556	22.2222	36.5079	27.1605	17.7083	44.5571	37.5	10	34.058	11.9048	24.8248	7.69231	15.2	52.9412	15.7895	31.2067	37.5	38.4615	20	25	43.4576	7.04225	18.6192
GNB1	39.1376	33.8415	47.2973	34.8936	24.3902	56.3017	42.2452	52.2388	80.8511	61.3936	58.6002	66.1871	49.4624	75.8993	64.5963	47.2222	77.7778	68.254	62.4339	59.375	84.3693	75	80	55.0725	44.4444	68.5686	57.4359	40.8	76.4706	89.4737	67.8225	75	61.5385	60	67.6471	74.4647	42.2535	62.1339
AL109917.1	0.165837	0	1.35135	0	0	0.194647	0	0	0	0	0	0.215827	0	0.359712	0.621118	0	0	0	0.529101	0	0.141266	0	0	0	0	0.2002	0	0	0	0	0.554785	0	0	0	0.490196	0.158604	0	0
CALML6	0.165837	0	0	0	0	0.291971	0	0	0	0	0	0	0.0977517	0	0	0	0	0.396825	0	0	0.0166196	0	0	0	0	0.1001	0	0.8	0	0	0.416089	0	0	0	0	0.147275	0	0
TMEM52	0	0	1.35135	0.425532	0	1.50852	0	1.49254	4.25532	0	0.355872	0	0.684262	0	0	0	0	0	13.0511	0.833333	1.08027	6.25	0	0.724638	0	0	0.512821	7.2	0	10.5263	0.970874	0	15.3846	0	1.96078	5.14331	1.40845	0
CFAP74	0.165837	0.304878	0	0.425532	0	0.389294	0	0	0	0.564972	0	0.28777	0.293255	0	0.621118	0	0	0	64.903	0	0.124647	0	0	1.44928	0	0.2002	0	0	0	0	0.970874	0	0	0	0	0.645746	2.8169	0.209205
AL391845.2	0	0.152439	0	0	0	0	0	0	0	0	0	0	0	0	0	0	0	0	0	0	0	0	0	0	0	0	0	0	0	0	0	0	0	0	0	0.0339866	0	0.209205
GABRD	0	0	0	0.425532	0	0.486618	0.14771	0	2.12766	0.376648	0.118624	0.0719424	0.293255	0.359712	0	2.77778	11.1111	0.396825	0.529101	0.208333	0.166196	0	0	0	0	0	0	0	0	0	0.277393	0	0	0	1.47059	0.521128	0	0.209205
AL391845.1	0	0	0	0	0	0.0973236	0	0	0	0	0	0	0	0	0	0	0	0	0.529101	0	0	0	0	0	0	0	0	0	0	0	0.138696	0	0	0	0	0.147275	0	0
PRKCZ	5.3068	4.26829	1.35135	2.55319	3.65854	17.3723	2.65879	0	4.25532	2.63653	0.948992	1.15108	30.0098	5.03597	1.24224	11.1111	0	0.793651	30.5115	3.33333	3.26575	6.25	10	8.69565	3.96825	1.5015	0.512821	4	0	10.5263	20.527	12.5	23.0769	8	65.6863	61.799	0	2.71967
AL590822.2	0	0.457317	0	0.851064	2.43902	0.924574	0.886263	0	0	0	0.237248	0.359712	0.977517	0.359712	0	0	0	0.396825	2.1164	0	0.232674	0	0	1.44928	0.793651	0.2002	0	0	0	0	2.08044	0	0	0	3.92157	2.67362	0	0
PRKCZ-AS1	0.331675	0	0	0.851064	0	0.340633	0	0	0	0	0.118624	0.0719424	0.195503	0	0	0	0	0	0.176367	0.208333	0.0498587	6.25	0	0	0	0.2002	0.512821	0	0	0	0.554785	0	0	0	0	0.498471	0	0.209205
FAAP20	32.1725	23.4756	32.4324	31.4894	18.2927	52.2628	25.7016	31.3433	72.3404	14.5009	18.0308	38.8489	38.8074	50.3597	28.5714	38.8889	33.3333	36.5079	54.6737	40.8333	50.3407	75	50	9.42029	16.6667	37.037	33.3333	39.2	58.8235	47.3684	57.975	50	53.8462	56	47.0588	77.5915	36.6197	30.5439
AL590822.1	0	0	0	0	0	0	0	0	0	0	0	0	0	0	0	0	0	0	0.352734	0	0.0166196	0	0	0	0	0	0	0	0	0	0	0	0	0	0	0.0566444	0	0.209205
SKI	10.2819	11.2805	21.6216	17.0213	6.09756	23.4063	12.26	23.8806	42.5532	19.5857	23.2503	6.54676	18.0841	18.3453	31.0559	22.2222	55.5556	7.93651	15.873	23.3333	36.9453	31.25	10	15.942	10.3175	18.2182	17.4359	4	0	31.5789	17.0596	12.5	30.7692	24	20.098	39.787	25.3521	30.5439
MORN1	0.331675	0.609756	1.35135	1.70213	1.21951	4.91484	0.886263	2.98507	8.51064	1.69492	0.830368	0.863309	3.61681	0.719424	1.86335	0	0	1.5873	54.6737	1.66667	1.54562	6.25	10	1.44928	1.5873	0.600601	1.53846	1.6	5.88235	10.5263	6.65742	25	0	0	3.43137	7.19384	2.8169	2.30126
AL589739.1	0	0	0	0	0	0.0486618	0	0	0	0	0.118624	0.0719424	0	0	0	0	0	0	0.705467	0	0.00830979	0	0	0	0	0	0	0	0	0	0	0	0	0	0	0.0453155	0	0
AL513477.1	0	0	0	0	0	0.389294	0	0	2.12766	0	0.237248	0.143885	0.391007	0.359712	0	0	0	0.396825	6.87831	0.208333	0.299152	12.5	0	0	0	0.3003	0	0	5.88235	0	1.38696	0	0	4	1.96078	1.12156	0	0.209205
AL513477.2	0.165837	0.304878	0	0	0	1.75182	0.443131	1.49254	0	0.376648	0.474496	0.0719424	2.24829	0.719424	0.621118	2.77778	0	1.19048	3.88007	0.625	0.39887	0	0	0.724638	0.793651	0.2002	1.02564	0	0	0	2.08044	0	0	0	1.47059	1.7673	0	0.627615
RER1	35.4892	28.0488	60.8108	37.0213	31.7073	55.3771	43.5746	46.2687	63.8298	29.5669	28.8256	35.6115	52.1017	70.1439	35.4037	38.8889	44.4444	43.254	73.8977	43.125	82.9982	87.5	40	26.8116	37.3016	43.2432	36.9231	71.2	52.9412	57.8947	75.8669	62.5	84.6154	52	65.6863	80.8315	36.6197	43.5146
PEX10	1.99005	1.82927	10.8108	5.95745	2.43902	12.6034	7.0901	5.97015	23.4043	4.51977	3.44009	3.59712	7.62463	8.27338	5.59006	2.77778	11.1111	3.96825	20.1058	7.08333	19.5197	25	10	0	1.5873	5.80581	3.58974	11.2	5.88235	15.7895	19.2788	37.5	7.69231	12	11.7647	22.114	4.22535	6.27615
PLCH2	1.3267	0.914634	0	0	2.43902	16.4964	0.14771	0	0	0.376648	0.237248	0.215827	3.12805	0	0	0	0	0.396825	5.11464	0.625	0.157886	6.25	0	0	3.1746	0.2002	0.512821	0	0	5.26316	10.8183	37.5	0	0	0	0.736377	0	0.41841
AL139246.1	0	0	0	0	0	0	0	0	0	0	0.118624	0	0	0	0	0	0	0	0	0	0.0332392	0	0	0	0	0.1001	0	0	0	0	0	0	0	0	0	0	0	0
AL139246.4	0	0	0	0	0	0	0	0	0	0	0	0	0	0	0	0	0	0	0	0	0	0	0	0	0	0	0	0	0	0	0	0	0	0	0	0	0	0
PANK4	2.81924	2.59146	2.7027	1.2766	2.43902	4.81752	2.65879	2.98507	17.0213	2.63653	2.4911	2.30216	2.6393	3.23741	4.96894	2.77778	11.1111	1.19048	7.40741	3.125	8.84993	12.5	0	3.62319	6.34921	2.4024	2.05128	3.2	5.88235	21.0526	6.79612	0	7.69231	0	6.37255	10.8304	1.40845	2.30126
HES5	0	0.152439	0	0	0	0.291971	0.14771	0	0	0.376648	0	0	0.0977517	0	0.621118	0	0	0	0.176367	0.416667	0.00830979	0	0	0	0	0	0	0.8	0	0	3.05132	0	0	0	0	0.962955	1.40845	0.209205
AL139246.5	7.9602	4.11585	0	2.12766	4.87805	3.40633	1.03397	11.9403	6.38298	0.564972	1.54211	6.90647	5.6696	4.67626	1.86335	8.33333	0	11.9048	27.6896	3.75	4.08011	6.25	10	10.1449	15.0794	12.2122	15.3846	2.4	0	21.0526	16.5049	0	0	0	3.43137	5.85703	7.04225	1.25523
TNFRSF14-AS1	3.48259	5.33537	2.7027	0.851064	10.9756	3.309	6.94239	0	0	3.9548	2.72835	0.935252	3.22581	1.79856	1.86335	0	0	1.5873	26.6314	1.25	7.82782	0	0	0.724638	4.7619	1.4014	2.05128	5.6	0	0	12.4827	12.5	0	0	7.84314	9.50493	1.40845	1.25523
TNFRSF14	24.7098	21.4939	18.9189	18.2979	28.0488	29.3917	28.8035	10.4478	34.0426	26.3653	21.1151	25.6835	21.5054	29.1367	30.4348	33.3333	55.5556	31.746	36.8607	29.5833	61.1019	68.75	20	19.5652	26.1905	39.5395	18.4615	26.4	29.4118	31.5789	49.9307	12.5	15.3846	16	22.549	30.6333	19.7183	30.1255
AL139246.2	0	0.304878	0	0	0	0	0	0	0	0	0	0	0	0	0	0	0	0	0	0	0.0166196	0	0	0	0	0	0	0	0	0	0.138696	0	0	0	0	0.0226578	0	0
AL139246.3	0.497512	0.304878	0	0	0	0.243309	0.14771	0	0	0	0	0	0	0.359712	0	0	0	0	1.41093	0.833333	0.199435	0	0	0	0	0	0	1.6	0	0	1.38696	0	0	0	0	0.158604	0	1.25523
PRXL2B	2.81924	2.7439	2.7027	2.55319	2.43902	7.83455	5.16987	10.4478	23.4043	7.72128	5.69395	1.65468	5.96285	2.51799	9.31677	8.33333	11.1111	1.19048	26.1023	9.375	6.92205	6.25	30	2.17391	3.96825	3.1031	10.7692	1.6	0	10.5263	19.6949	12.5	15.3846	12	8.33333	14.6369	5.6338	10.6695
MMEL1	0.165837	0	1.35135	0.425532	0	1.21655	3.24963	2.98507	0	7.53296	4.38909	0.28777	0.879765	0	4.34783	0	0	0	3.88007	1.875	3.09124	31.25	0	0.724638	0	0.600601	1.02564	0	0	0	7.3509	0	0	0	0.980392	0.453155	0	4.39331
AL831784.1	0	0	0	0	0	0	0	0	0	0	0	0	0	0	0	0	0	0	0	0	0.00830979	0	0	0	0	0	0	0	0	0	0	0	0	0	0	0	0	0
TTC34	0.331675	0.304878	2.7027	0	1.21951	1.41119	0.443131	1.49254	4.25532	0.188324	0.474496	0.28777	1.07527	0.719424	0	2.77778	0	0.793651	17.1076	0.208333	0.880838	0	0	0	1.5873	1.001	0.512821	1.6	0	0	1.94175	0	0	0	0.980392	0.464484	0	0.83682
AC242022.2	0	0	0	0	0	0	0	0	0	0	0	0	0	0	0	0	0	0	8.28924	0	0	0	0	0.724638	0	0	0	0	0	0	0	0	0	0	0	0.0113289	0	0
AC242022.1	0	0	0	0	0	0	0	0	0	0	0	0	0	0	0	0	0	0	1.23457	0	0.00830979	0	0	0	0	0	0	0	0	0	0	0	0	0	0	0.0113289	0	0
AL592464.2	0	0	0	0	0	0	0	0	0	0	0	0	0	0	0	0	0	0	0	0	0	0	0	0	0	0	0	0	0	0	0	0	0	0	0	0	0	0
AL592464.1	0	0	0	0	0	0	0	0	0	0	0	0	0	0	0	0	0	0	0	0	0	0	0	0	0	0	0	0	0	0	0	0	0	0	0	0	0	0
AL589702.1	0	0	0	0	0	0	0	0	0	0	0	0	0	0	0	0	0	0	0	0	0	0	0	0	0	0	0	0	0	0	0	0	0	0	0	0	0	0
ACTRT2	0	0	0	0	0	0	0	0	0	0	0	0	0	0	0	0	0	0	0	0	0	0	0	0	0	0	0	0	0	0	0	0	0	0	0	0	0	0
LINC00982	0.165837	0	0	0	0	2.2871	0	5.97015	0	0	0.355872	0	4.49658	0	4.96894	0	11.1111	0	4.40917	0.208333	0.0914077	0	20	0	0	0	0	0.8	0	5.26316	1.66436	0	0	4	11.2745	5.36989	0	0.209205
PRDM16	0.66335	0.914634	1.35135	1.2766	0	11.7275	0.590842	7.46269	2.12766	0.94162	0.830368	0.143885	15.738	0	13.0435	0	0	0	8.28924	0.625	0.149576	0	20	0	0.793651	0.1001	0	0	0	0	7.4896	12.5	0	0	20.098	22.5671	2.8169	1.67364
MIR4251	0	0	0	0	0	0	0	0	0	0	0	0	0	0	0	0	0	0	0	0	0	0	0	0	0	0	0	0	0	0	0	0	0	0	0	0	0	0
AL008733.1	0	0	0	0	0	0.0486618	0	0	0	0	0	0	0	0	0	0	0	0	0	0	0	0	0	0	0	0	0	0	0	0	0.277393	0	0	0	1.47059	1.22352	0	0
AL512383.1	0	0.152439	1.35135	0	0	0.827251	0	0	0	0	0.118624	0	1.36852	0	0	0	0	0	0.352734	0	0.0249294	0	0	0	0	0	0	0	0	0	0.832178	0	0	0	3.43137	4.18036	0	0
AL590438.1	0	0	0	0	0	0.0486618	0	0	0	0	0	0	0.0977517	0	0	0	0	0	0.529101	0	0	0	0	0	0	0	0	0	0	0	0	0	0	0	0	0.124618	0	0
ARHGEF16	0.331675	0.304878	2.7027	0.425532	0	12.4574	0.295421	0	2.12766	0.376648	0.355872	0.143885	5.37634	0.359712	0.621118	0	0	0.396825	6.87831	0	0.648164	6.25	0	0	0	0.2002	0	1.6	0	26.3158	11.5118	0	23.0769	0	13.7255	17.1859	1.40845	0.209205
AL512413.1	0	0	0	0	0	0.486618	0	0	0	0	0	0	0	0	0	0	0	0	0.176367	0	0	0	0	0	0	0	0	0	0	0	0.416089	0	0	0	0.490196	0.249235	0	0
MEGF6	1.3267	2.89634	14.8649	17.0213	1.21951	7.59124	2.51108	10.4478	12.766	1.31827	2.4911	1.07914	4.98534	2.51799	8.07453	25	11.1111	0.396825	3.52734	10.8333	1.55393	18.75	0	2.17391	0.793651	1.001	1.53846	0.8	0	10.5263	3.32871	0	7.69231	8	29.4118	30.8712	9.85915	10.6695
MIR551A	0	0	0	0	0	0	0	0	0	0	0	0	0	0	0	0	0	0	0	0	0	0	0	0	0	0	0	0	0	0	0	0	0	0	0	0.0113289	0	0
AL513320.1	0.331675	0	0	0	0	0.0486618	0	0	0	0	0	0	0.293255	0	0	0	0	0	0.705467	0	0.0249294	0	0	0	0	0.1001	0	0	0	0	0	0	0	0	0	0.0453155	0	0
TPRG1L	9.12106	9.14634	10.8108	15.3191	3.65854	17.0316	14.1802	14.9254	34.0426	16.7608	14.828	8.34532	14.8583	7.19424	18.0124	13.8889	0	11.5079	46.7372	16.6667	28.5607	43.75	10	14.4928	5.55556	10.2102	12.3077	12	11.7647	15.7895	23.0236	12.5	46.1538	12	26.4706	35.9692	28.169	22.8033
WRAP73	9.61857	7.31707	10.8108	7.65957	7.31707	11.3869	8.12408	11.9403	29.7872	8.47458	7.82918	6.54676	10.5572	12.9496	9.93789	2.77778	11.1111	5.55556	18.1658	7.5	20.9656	31.25	20	0.724638	9.52381	7.30731	7.17949	12	5.88235	10.5263	16.3662	25	7.69231	12	12.7451	22.148	7.04225	10.251
TP73	0.165837	0.152439	0	0	0	8.36983	0.14771	0	0	0.188324	0.118624	0	0.391007	0.359712	0	5.55556	0	0.793651	55.3792	0	0.249294	0	0	0	0.793651	0	0	3.2	0	0	2.63523	0	0	0	0.980392	0.849666	0	0.209205
AL136528.1	0	0	0	0	0	0	0.14771	0	0	0	0	0	0	0	0	0	0	0	0	0	0.0249294	0	0	0	0	0	0	0	0	0	0	0	0	0	0	0.0453155	0	0
AL136528.2	0	0	0	0	0	0	0	0	0	0	0	0	0	0	0	0	0	0	0	0	0	0	0	0	0	0	0	0	0	0	0	0	0	0	0	0	0	0
TP73-AS1	0.995025	3.35366	4.05405	6.80851	3.65854	8.56448	1.4771	4.47761	8.51064	3.20151	4.62633	2.8777	9.57967	4.67626	6.21118	5.55556	0	2.77778	8.28924	7.29167	5.80023	12.5	10	0	3.1746	4.004	6.15385	4	5.88235	5.26316	10.4022	12.5	0	4	9.80392	11.9406	4.22535	6.27615
RF02197	0	0	0	0	0	0	0	0	0	0	0	0	0	0	0	0	0	0	0	0	0	0	0	0	0	0	0	0	0	0	0	0	0	0	0	0.0113289	0	0
CCDC27	0	0	0	0	0	0.0486618	0	0	0	0	0	0	0	0	0	0	0	0	0	0	0	0	0	0	0	0.1001	0	0	0	0	0	0	0	0	0	0.0453155	0	0
SMIM1	0.995025	1.37195	1.35135	2.97872	3.65854	8.36983	5.46529	4.47761	0	0.94162	0.948992	0.647482	16.52	1.43885	3.72671	2.77778	0	1.5873	10.582	2.29167	0.490278	25	0	0	1.5873	0.600601	1.02564	14.4	0	21.0526	9.84743	12.5	30.7692	0	14.7059	35.516	1.40845	1.67364
LRRC47	10.1161	8.38415	6.75676	7.65957	7.31707	18.9294	8.71492	13.4328	29.7872	12.0527	8.77817	10.0719	13.6852	10.4317	8.69565	11.1111	11.1111	8.73016	22.0459	11.4583	18.4062	12.5	20	0.724638	7.93651	9.20921	9.23077	15.2	5.88235	21.0526	20.9431	37.5	23.0769	20	18.6275	37.2833	7.04225	9.62343
RN7SL574P	0.165837	0	0	0	0	0.291971	0.14771	0	0	0	0	0.0719424	0.293255	0	0	0	0	0	0.176367	0.208333	0.0166196	0	0	0	0.793651	0.1001	0	0	0	0	0.138696	0	0	0	0	0.668404	0	0
AL365330.1	0.165837	0.152439	0	0	0	0.0973236	0.295421	0	0	0	0	0	0.684262	0	0	0	0	0	0.352734	0	0	0	0	0	0	0.1001	0	0	0	0	0.138696	0	0	0	0.490196	0.487142	0	0
CEP104	7.46269	7.77439	8.10811	5.53191	4.87805	13.9173	5.90842	4.47761	36.1702	6.77966	7.71056	6.40288	15.738	11.8705	4.96894	13.8889	22.2222	5.95238	37.037	7.91667	20.4005	43.75	0	2.17391	7.14286	9.30931	8.71795	12.8	23.5294	26.3158	20.111	12.5	30.7692	8	23.0392	40.1269	5.6338	9.83264
DFFB	3.48259	2.7439	0	1.2766	1.21951	3.50365	1.77253	1.49254	4.25532	1.50659	1.66074	2.01439	3.42131	2.15827	3.10559	2.77778	0	1.19048	2.6455	2.70833	3.54828	6.25	10	0	6.34921	2.4024	0.512821	1.6	5.88235	0	1.94175	0	0	8	1.96078	7.3751	0	2.30126
C1orf174	10.2819	5.33537	17.5676	5.95745	7.31707	18.3455	16.6913	7.46269	23.4043	6.21469	5.69395	7.33813	12.219	14.3885	8.07453	5.55556	11.1111	8.73016	18.8713	12.9167	33.6962	31.25	20	0.724638	12.6984	12.012	10.7692	12.8	5.88235	21.0526	23.9945	12.5	23.0769	12	15.6863	23.9153	12.6761	10.6695
LINC01134	0	0.152439	0	0	0	0.0486618	0	0	0	0	0	0.0719424	0.293255	0	0	0	0	0.396825	1.76367	0	0.589995	0	0	0.724638	0	0.2002	0	0	0	0	0	0	0	0	0	0.611759	0	0
LINC01346	0	0	0	0	0	0	0	0	0	0	0	0	0	0	0	0	0	0	0	0	0	0	0	0	0	0	0	0	0	0	0	0	0	0	0	0	0	0
LINC01345	0	0	0	0	0	0	0	0	0	0	0	0	0	0	0	0	0	0	0	0	0	0	0	0	0	0	0	0	0	0	0	0	0	0	0	0	0	0
AL805961.1	0	0	0	0	0	0	0	0	0	0	0	0	0	0	0	0	0	0	0	0	0	0	0	0	0	0	0	0	0	0	0	0	0	0	0	0	0	0
AL805961.2	0	0	0	0	0	0.0486618	0	0	2.12766	0	0	0	0	0	0.621118	0	0	0	0	0	0.0581685	0	0	0	0	0	0	0	0	0	0	0	0	0	0	0.124618	1.40845	0
EEF1DP6	0	0	0	0	0	0	0	0	0	0	0	0	0	0	0	0	0	0	0	0	0	0	0	0	0	0	0	0	0	0	0	0	0	0	0	0	0	0
LINC01777	0	0	0	0	0	0	0	0	0	0	0	0	0	0	0	0	0	0	0	0	0	0	0	0	0	0	0	0	0	0	0	0	0	0	0	0	0	0
AL355602.1	0	0	0	0	0	0	0	0	0	0	0	0	0	0	0	0	0	0	0	0	0	0	0	0	0	0	0	0	0	0	0	0	0	0	0	0	0	0
Z98747.1	0	0	0	0	0	0	0	0	0	0	0	0	0	0	0	0	0	0	0	0	0.00830979	0	0	0	0	0	0	0	0	0	0	0	0	0	0	0	0	0
LINC01646	0	0	0	0	0	0	0	0	0	0	0	0	0	0	0	0	0	0	0	0	0	0	0	0	0	0	0	0	0	0	0	0	0	0	0	0	0	0
AJAP1	0	0	0	0.425532	1.21951	1.11922	0	0	0	3.9548	0.474496	0	0.488759	0	0	0	0	0	1.94004	0.416667	0.0249294	0	0	0	0	0	0.512821	1.6	0	0	0.554785	12.5	0	0	0	0.135947	0	0.83682
BX005132.2	0	0	0	0	0	0	0	0	0	0	0	0	0	0	0	0	0	0	0	0	0	0	0	0	0	0	0	0	0	0	0	0	0	0	0	0	0	0
BX005132.1	0	0	0	0	0	0	0	0	0	0	0	0	0	0	0	0	0	0	0	0	0	0	0	0	0	0	0	0	0	0	0	0	0	0	0	0	0	0
AL691497.1	0	0	0	0	0	0	0	0	0	0	0	0	0	0	0	0	0	0	0	0	0	0	0	0	0	0	0	0	0	0	0	0	0	0	0	0	0	0
AL139823.1	0	0	0	0	0	0	0	0	0	0	0	0	0	0	0	0	0	0	0	0	0	0	0	0	0	0	0	0	0	0	0	0	0	0	0	0	0	0
Z98259.3	0	0	0	0	0	0.0486618	0	0	0	0	0	0	0	0	0	0	0	0	0	0	0	0	0	0	0	0	0	0	0	0	0	0	0	0	0	0	0	0
Z98259.2	0	0	0	0	0	0	0	0	0	0	0	0	0	0	0	0	0	0	0	0	0	0	0	0	0	0	0	0	0	0	0	0	0	0	0	0	0	0
Z98259.1	0	0	0	0	0	0	0	0	0	0	0	0	0	0	0	0	0	0	0	0	0	0	0	0	0	0	0	0	0	0	0	0	0	0	0	0	0	0
Z97988.2	0	0	0	0	0	0	0	0	0	0	0	0	0	0	0	0	0	0	0	0	0	0	0	0	0	0	0	0	0	0	0	0	0	0	0	0	0	0
AL365255.1	0	0	0	0	0	0	0	0	0	0	0	0	0	0	0	0	0	0	0	0	0	0	0	0	0	0	0	0	0	0	0	0	0	0	0	0.0113289	0	0
Z97988.1	0	0	0	0	0	0	0	0	0	0	0	0	0	0	0	0	0	0	0	0	0	0	0	0	0	0	0	0	0	0	0	0	0	0	0	0	0	0
MIR4689	0	0	0	0	0	0	0	0	0	0	0	0	0	0	0	0	0	0	0	0	0	0	0	0	0	0	0	0	0	0	0	0	0	0	0	0	0	0
NPHP4	0.66335	0.609756	1.35135	1.2766	0	2.33577	1.32939	1.49254	0	0.376648	1.54211	1.65468	4.49658	3.95683	1.24224	0	0	0.793651	20.1058	2.08333	4.68672	25	10	2.89855	0	1.6016	0.512821	1.6	0	0	3.6061	0	0	4	4.41176	9.75416	1.40845	2.09205
KCNAB2	21.5589	14.7866	4.05405	2.97872	9.7561	5.20681	13.2939	7.46269	6.38298	1.88324	2.9656	27.8417	3.61681	23.741	3.10559	0	33.3333	31.3492	15.1675	5.41667	60.8277	25	0	10.8696	35.7143	36.1361	6.66667	11.2	23.5294	5.26316	7.21221	12.5	15.3846	4	2.94118	6.28753	4.22535	3.13808
CHD5	0.165837	0	0	0.425532	0	0.0486618	0	1.49254	0	0.188324	0	0	0.0977517	0	0	0	0	0	0	0	0	0	0	0	0	0.1001	0	0	0	0	0	0	0	0	0	0.0453155	0	0
AL031847.2	0	0	0	0	0	0	0	0	0	0	0	0	0	0	0	0	0	0	0	0	0.0166196	6.25	0	0	0	0	0	0	0	0	0.138696	0	0	0	0	0.0453155	0	0
RPL22	79.2703	88.7195	82.4324	75.7447	89.0244	97.2749	91.2851	82.0896	100	46.1394	49.8221	88.1295	94.8192	93.1655	70.8075	80.5556	100	93.254	83.2451	95.8333	94.8812	100	90	9.42029	65.873	88.3884	54.359	72.8	100	73.6842	94.8682	100	100	92	74.0196	98.414	73.2394	83.0544
AL031847.1	0	0	1.35135	0	0	0.729927	0	0	0	0	0	0	0.293255	0	0	0	0	0	0.881834	0.208333	0.0415489	0	0	0	0	0	0	0.8	0	0	0.693481	12.5	0	0	0.490196	0.70239	0	0
RNF207	0.497512	1.52439	2.7027	2.12766	1.21951	21.8005	0.295421	2.98507	6.38298	1.12994	0.948992	0.431655	10.2639	1.07914	0.621118	5.55556	0	0	10.7584	1.875	0.249294	12.5	0	0	0	0.600601	2.05128	3.2	0	5.26316	26.491	12.5	0	4	8.33333	6.66138	5.6338	3.9749
ICMT	5.97015	5.03049	14.8649	6.80851	1.21951	16.837	6.79468	20.8955	46.8085	8.6629	7.59193	7.69784	17.9863	7.55396	8.69565	11.1111	33.3333	7.93651	43.739	17.7083	24.4806	43.75	30	2.17391	3.96825	8.90891	12.3077	16	0	15.7895	30.0971	62.5	46.1538	28	28.4314	45.5308	18.3099	14.8536
LINC00337	0	0	0	0	0	0.0973236	0	0	0	0	0	0	0	0	0	0	0	0	0	0	0.216055	0	0	0	0.793651	0	0	0	0	0	0.138696	0	0	0	0	0.192591	0	0
HES3	0	0	0	0	0	0	0	0	0	0	0	0	0	0	0	0	0	0	0	0	0	0	0	0	0	0	0	0	0	0	0	0	0	0	0	0	0	0
GPR153	0.995025	0.152439	6.75676	12.766	0	1.11922	6.49926	1.49254	0	0.376648	0	0.431655	0.488759	2.51799	0	0	0	0	0.352734	0.208333	12.7638	6.25	0	0	5.55556	0.800801	10.7692	0.8	0	0	4.57698	0	0	8	0.490196	1.74465	2.8169	0.627615
ACOT7	5.14096	1.67683	2.7027	5.95745	3.65854	13.4307	50.8124	4.47761	38.2979	8.47458	7.23606	2.23022	5.18084	16.1871	6.21118	8.33333	11.1111	1.98413	11.6402	8.33333	53.3572	25	20	2.17391	10.3175	3.2032	5.64103	4	11.7647	15.7895	16.5049	25	30.7692	16	15.1961	24.0172	7.04225	11.2971
AL031848.2	0.331675	0.457317	0	1.70213	1.21951	2.33577	0.886263	0	2.12766	0.376648	0.59312	0.719424	0.977517	0.719424	0	0	0	0.396825	3.1746	1.45833	1.28802	0	0	0	0.793651	1.001	1.02564	0.8	5.88235	5.26316	2.77393	0	0	0	2.45098	1.66534	1.40845	0.209205
HES2	0.497512	0.457317	0	2.12766	0	4.23358	4.72674	1.49254	0	0.753296	0.355872	0.431655	0.684262	1.79856	0.621118	5.55556	0	0.396825	22.0459	1.25	29.6743	12.5	0	0	0	0.3003	1.02564	3.2	0	5.26316	4.43828	0	0	0	1.47059	1.4501	1.40845	0.209205
ESPN	0.331675	0.914634	0	0	0	3.89294	0.295421	2.98507	0	0.188324	0	0.0719424	4.10557	0.359712	0	0	0	0.396825	30.6878	0.416667	1.20492	0	10	0	0.793651	0	0	0.8	0	21.0526	9.01526	12.5	0	0	0.980392	1.12156	0	0
MIR4252	0	0	0	0	0	0	0	0	0	0	0	0	0	0	0	0	0	0	0	0	0	0	0	0	0	0	0	0	0	0	0	0	0	0	0	0	0	0
AL031848.1	0	0	0	0	0	0	0	0	0	0	0	0	0	0	0	0	0	0	0	0	0	0	0	0	0	0.1001	0	0	0	0	0	0	0	0	0	0.0339866	0	0
TNFRSF25	9.12106	17.9878	1.35135	0.425532	2.43902	3.89294	0.14771	1.49254	17.0213	0.94162	3.20285	0.647482	2.73705	1.07914	4.34783	0	0	0.793651	3.35097	1.04167	0.216055	0	0	0	5.55556	0.900901	0	0	0	0	2.49653	12.5	0	0	2.45098	1.82395	0	3.55649
PLEKHG5	0.331675	0.457317	1.35135	0.851064	1.21951	3.84428	0	0	19.1489	2.25989	5.21945	0.143885	1.17302	0.359712	4.96894	5.55556	0	0	1.5873	1.25	0.207745	6.25	0	0	0	0.1001	0	0	5.88235	0	2.91262	12.5	0	0	1.47059	3.11544	0	2.51046
NOL9	8.78939	7.46951	8.10811	7.23404	4.87805	16.6423	5.613	10.4478	51.0638	6.96798	10.6762	6.76259	13.8807	9.71223	10.559	8.33333	22.2222	7.14286	18.1658	13.3333	13.7693	31.25	10	0	7.93651	9.10911	9.74359	10.4	0	10.5263	18.4466	12.5	23.0769	16	20.098	29.2738	4.22535	9.83264
RNU6-731P	0	0	0	0	0	0	0	0	0	0	0	0	0	0	0	0	0	0	0	0	0	0	0	0	0	0	0	0	0	0	0	0	0	0	0	0	0	0
AL591866.1	0	0	0	0	0	0	0	0	0	0	0	0	0.0977517	0	0	0	0	0	0	0	0.0332392	0	0	0	0	0	0	0	0	0	0	0	0	0	0.980392	0.0453155	0	0.209205
TAS1R1	0	0	0	0.851064	0	0.0486618	0	0	0	0	0	0	0.0977517	0	0	0	11.1111	0	0.176367	0	0.00830979	0	0	0	0	0	0	0	0	0	0.693481	0	0	0	0	0.090631	0	0.209205
ZBTB48	5.14096	3.96341	5.40541	3.82979	6.09756	13.4793	16.6913	7.46269	8.51064	5.27307	3.67734	6.04317	6.84262	12.9496	5.59006	5.55556	11.1111	4.36508	24.515	6.04167	18.2815	18.75	20	5.07246	7.93651	5.90591	9.23077	6.4	5.88235	10.5263	12.344	12.5	30.7692	4	7.84314	15.4752	8.4507	4.60251
KLHL21	4.47761	3.81098	13.5135	8.93617	0	16.253	3.10192	2.98507	14.8936	2.63653	2.4911	3.88489	5.18084	4.67626	2.48447	2.77778	22.2222	5.95238	20.2822	6.875	10.6116	0	20	6.52174	3.96825	3.9039	5.12821	2.4	0	0	11.9279	50	38.4615	12	11.7647	21.6382	8.4507	5.02092
PHF13	1.65837	2.89634	9.45946	5.95745	1.21951	7.54258	2.8065	5.97015	2.12766	3.20151	4.27046	2.66187	6.54936	5.7554	4.96894	2.77778	11.1111	3.57143	9.17108	3.75	8.59232	18.75	10	2.89855	2.38095	2.7027	2.5641	4	0	5.26316	7.4896	12.5	30.7692	4	13.2353	12.5977	11.2676	4.81172
THAP3	4.80929	3.96341	10.8108	4.68085	1.21951	10.6569	4.57903	11.9403	6.38298	5.08475	5.10083	3.88489	6.15836	3.95683	5.59006	2.77778	0	5.15873	10.2293	7.08333	11.5672	18.75	20	2.17391	4.7619	4.7047	9.23077	12.8	5.88235	21.0526	9.57004	0	23.0769	12	14.2157	12.9149	8.4507	6.48536
DNAJC11	3.31675	2.13415	10.8108	5.53191	4.87805	11.4355	5.02216	4.47761	25.5319	5.64972	5.10083	4.96403	8.40665	8.99281	11.1801	2.77778	11.1111	6.34921	12.6984	4.58333	12.955	18.75	10	1.44928	6.34921	7.40741	6.15385	5.6	17.6471	0	16.2275	37.5	23.0769	12	12.2549	25.3654	4.22535	9.20502
LINC01672	0	0.152439	0	0	0	0.0486618	0	0	0	0	0.118624	0.0719424	0	0	0	0	0	0	0	0	0	0	0	0	0	0	0	0	0	0	0	0	0	0	0	0.0339866	0	0
AL591163.1	0	0.304878	0	0	0	0.243309	0.14771	0	0	0	0.118624	0.143885	0.0977517	0.359712	0	0	0	0	0	0.208333	0.199435	0	0	0	0	0.2002	0	0	0	0	0.277393	0	0	0	0.490196	0.577773	0	0
CAMTA1-DT	0.331675	0	0	0	1.21951	0.437956	0	0	0	0	0.118624	0.143885	0.391007	0	0	0	0	0.396825	0	0.416667	0.0747881	0	0	0	0	0.1001	0	0	0	0	0.277393	0	0	0	0	0.40784	0	0.41841
CAMTA1	20.8955	18.4451	33.7838	24.6809	20.7317	62.8224	27.1787	43.2836	78.7234	33.71	29.4187	31.295	48.3871	56.8345	50.3106	36.1111	11.1111	26.1905	51.3228	53.125	63.1959	87.5	70	4.34783	15.873	32.6326	23.0769	36.8	41.1765	78.9474	65.4646	62.5	61.5385	52	54.4118	74.6007	35.2113	50.8368
AL590128.1	0	0	1.35135	0	0	0.0973236	0.14771	0	0	0	0	0	0	0	0	0	0	0	0	0.208333	0.0166196	0	0	0	0	0	0	0	0	0	0	0	0	0	0	0.0339866	0	0
AL512330.1	0	0	0	0	0	0	0	0	0	0	0	0	0	0	0	0	0	0	0	0	0	0	0	0	0	0	0	0	0	0	0	0	0	0	0	0	0	0
RNU1-8P	0	0	0	0	0	0	0	0	0	0	0	0	0	0	0	0	0	0	0	0	0	0	0	0	0	0	0	0	0	0	0.138696	0	0	0	0	0.0339866	0	0
CAMTA1-IT1	0	0	0	0	0	0.0973236	0	0	0	0.188324	0	0	0.0977517	0	0	0	0	0	0.176367	0.625	0.0166196	0	0	0	0	0	0	0	0	0	0	0	0	0	0.490196	0.0793021	0	0.41841
Z97987.1	0	0	0	0	0	0	0	0	0	0	0	0	0	0	0	0	0	0	0	0	0	0	0	0	0	0	0	0	0	0	0	0	0	0	0	0	0	0
AL365194.1	0	0	0	0	0	0	0	0	0	0	0	0	0	0	0	0	0	0	0.176367	0	0.0166196	0	0	0	0	0	0	0	0	0	0	0	0	0	0	0	0	0
AL359881.3	0	0	0	0	0	0	0	0	0	0	0	0	0	0	0.621118	0	0	0	0.176367	0.208333	0	0	0	0	0	0	0	0	0	0	0.138696	0	0	0	0	0.0226578	0	0
AL359881.2	0	0	0	0	1.21951	0.0486618	0	0	0	0.188324	0.118624	0	0	0	0	0	0	0	0.176367	0	0.0747881	0	0	0	0	0.1001	0	0	0	0	0	0	0	0	0	0.090631	0	0
AL359881.1	0	0.304878	0	0	0	0.0973236	0	0	0	0	0	0	0	0	0.621118	0	0	0	0	0	0.207745	0	0	0	0	0	0.512821	0	0	0	0.138696	0	0	0	0.490196	0.0339866	0	0
VAMP3	11.2769	8.84146	31.0811	19.5745	4.87805	40	27.7696	43.2836	72.3404	52.354	49.9407	32.518	26.5885	36.3309	56.5217	38.8889	55.5556	34.127	34.3915	62.9167	64.7748	43.75	30	10.1449	14.2857	38.5385	33.3333	24.8	17.6471	63.1579	38.5576	25	46.1538	32	44.1176	58.2304	26.7606	54.8117
Z98884.2	0	0	0	0	0	0	0	1.49254	0	0.188324	0.237248	0.0719424	0.293255	0	0	0	0	0	0.176367	0.208333	0.207745	0	0	0	0	0.2002	0	0	0	0	0.138696	0	0	0	0	0.249235	0	0
PER3	1.82421	1.06707	5.40541	7.65957	3.65854	16.0584	5.02216	5.97015	8.51064	4.7081	4.15184	1.58273	10.6549	6.11511	6.8323	8.33333	11.1111	1.5873	16.2257	9.58333	10.3208	18.75	20	2.17391	0.793651	3.2032	4.61538	1.6	0	21.0526	10.957	12.5	7.69231	0	15.1961	23.1562	4.22535	6.48536
Z98884.1	0	0	0	0	0	0.0973236	0.295421	0	0	0	0	0	0	0	0	0	0	0.396825	0	0	0.373941	0	0	0	0	0	0	0.8	0	0	0.138696	0	0	0	0	0.0566444	0	0
UTS2	8.29187	2.43902	0	0	0	0.486618	3.54505	0	0	0.376648	0.118624	2.30216	0.293255	0.359712	0	0	0	1.98413	0.529101	0.208333	1.68689	0	10	0	13.4921	2.002	1.02564	0.8	0	0	0.970874	0	0	0	0	0.30588	0	0.83682
TNFRSF9	3.48259	1.06707	1.35135	0	0	0.145985	1.77253	0	0	0	0	0.28777	0.0977517	3.95683	0.621118	0	11.1111	0	0.352734	0	0.299152	0	0	0.724638	2.38095	0	0	0	0	0	0	0	0	0	0.980392	1.66534	0	0
AL009183.1	0	0	0	0	0	0	0	0	0	0	0	0	0	0	0	0	0	0	0	0	0	0	0	0	0	0	0	0	0	0	0	0	0	0	0	0	0	0
PARK7	63.6816	56.8598	79.7297	64.6809	52.439	87.4453	65.4357	71.6418	89.3617	46.7043	43.8909	64.3165	75.2688	90.6475	53.4161	83.3333	66.6667	69.0476	87.6543	73.3333	92.3134	100	80	26.8116	63.4921	63.964	65.641	76.8	88.2353	100	92.5104	100	100	88	79.902	95.3438	69.0141	66.318
RF00019	0	0	0	0	0	0	0	0	0	0	0	0	0	0	0	0	0	0	0	0	0	0	0	0	0	0	0	0	0	0	0	0	0	0	0	0.0226578	0	0
AL034417.4	0	0.457317	0	0.425532	0	1.0219	0	0	2.12766	0.188324	0.118624	0.143885	0.293255	0	0	0	0	0.396825	1.23457	0	0.324082	0	0	0	0	0.3003	0.512821	0	0	0	0.832178	12.5	0	0	0.490196	2.43571	0	0
AL034417.3	0.165837	0.609756	0	1.2766	0	1.07056	0	0	0	0.376648	0.118624	0	1.07527	0	0	0	0	0	1.41093	0.208333	0.149576	0	0	0	1.5873	0.1001	0	0	0	5.26316	1.38696	12.5	7.69231	0	3.43137	15.294	1.40845	0.209205
ERRFI1	3.9801	4.87805	45.9459	34.8936	0	44.3309	3.54505	40.2985	21.2766	12.6177	15.4211	2.8777	44.6725	7.91367	22.3602	8.33333	66.6667	1.98413	34.0388	31.6667	11.4675	68.75	40	6.52174	2.38095	2.9029	8.20513	2.4	0	15.7895	44.9376	62.5	38.4615	16	75.9804	85.1592	30.9859	37.4477
AL034417.2	0.497512	0	0	0.851064	0	2.82238	0	1.49254	4.25532	0	0	0.0719424	1.56403	0.359712	0	0	0	0.793651	1.0582	0	0.174506	0	10	0	0	0.1001	0	0	0	0	5.27046	12.5	0	4	3.92157	6.9446	4.22535	0.41841
AL034417.1	0	0	0	0	0	0	0	0	0	0	0	0	0.0977517	0	0	0	0	0	0.176367	0.208333	0.00830979	0	0	0	0	0	0	0	0	0	0.138696	0	0	0	0	0.158604	0	0
AL358876.1	0	0	0	0	0	0	0	0	0	0	0	0	0	0	0	0	0	0	0	0	0.00830979	0	0	0	0	0	0	0	0	0	0	0	0	0	0	0.0226578	0	0
LINC01714	0	0	0	0	0	0	0	0	0	0	0	0	0	0	0	0	0	0	0.176367	0	0	0	0	0	0	0	0	0	0	0	0	0	0	0	0.490196	0.124618	0	0
RNU1-7P	0	0	0	0	0	0	0	0	0	0	0	0	0	0	0	0	0	0	0	0	0	0	0	0	0	0	0	0	0	0	0	0	0	0	0	0	0	0
AL358876.2	0	0	0	0	0	0	0	0	0	0	0	0	0	0	0	0	0	0	0	0	0.0415489	0	0	0	0	0	0	0	0	0	0	0	0	0	0	0.0113289	0	0
RNU6-991P	0	0	0	0	0	0	0	0	0	0	0	0	0	0	0	0	0	0	0	0	0	0	0	0	0	0	0	0	0	0	0	0	0	0	0	0	0	0
SLC45A1	0.165837	0.457317	1.35135	1.70213	0	0.973236	0.295421	1.49254	2.12766	0.564972	0.948992	0.215827	0.58651	1.07914	1.24224	5.55556	0	0	0.529101	0.833333	0.78112	0	0	0	0	0	2.5641	0.8	0	0	0.554785	0	0	0	0.490196	0.113289	0	0.83682
RF00019-1	0	0	0	0	0	0	0	0	0	0	0	0	0	0	0	0	0	0	0	0	0	0	0	0	0	0	0	0	0	0	0	0	0	0	0	0	0	0
RERE	15.0912	17.0732	21.6216	28.0851	19.5122	49.0511	20.384	37.3134	68.0851	24.8588	27.2835	15.9712	44.3793	18.705	28.5714	41.6667	44.4444	17.0635	57.3192	44.5833	23.0597	25	80	14.4928	13.4921	24.8248	37.4359	24	23.5294	68.4211	57.1429	50	76.9231	32	38.2353	58.1738	32.3944	39.3305
RERE-AS1	0.66335	0.304878	0	1.2766	0	0.0973236	0.295421	0	0	0	0.474496	0.0719424	0.195503	0	0.621118	0	0	0	0.529101	0.625	0.240984	0	0	0	0	0.500501	0	0	0	0	0.277393	0	0	0	0	0.181262	0	0.83682
RF00599	0	0	0	0	0	0.0973236	0	0	0	0	0	0	0.195503	0	0	0	0	0	0	0	0.00830979	0	0	0	0	0	0	0	0	0	0.138696	0	0	0	0	0.215249	0	0
AL096855.1	0	0	0	0	0	0	0	0	0	0	0	0	0	0	0	0	0	0	0	0.208333	0.00830979	0	0	0	0	0	0	0	0	0	0	0	0	0	0	0	0	0
RPL7P11	0	0	0	0	0	0.0973236	0	0	0	0.188324	0	0	0	0	0	0	0	0	0	0	0.0166196	0	0	0	0	0.3003	0	0	0	0	0	0	0	0	0	0	0	0
RPL7P7	0.331675	0.457317	1.35135	0.851064	1.21951	2.6764	0.590842	0	6.38298	0.753296	0.948992	0.503597	1.75953	0.359712	1.86335	0	0	0.396825	2.82187	0.833333	0.947316	0	10	0	0	0.500501	1.53846	0	0	5.26316	1.94175	0	0	0	1.47059	2.51501	0	1.46444
RF00019-2	0	0	0	0	0	0	0	0	2.12766	0	0	0	0	0	0	0	0	0	0	0	0.00830979	0	0	0	0	0	0	0	0	0	0	0	0	0	0	0.0793021	0	0
AL357552.1	0	0.152439	0	0	0	0.194647	0	0	0	0	0	0	0.195503	0	0	0	0	0	0	0.208333	0.0249294	0	0	0	0	0	0	0	0	0	0.277393	0	0	0	0	0.0793021	0	0.41841
AL357552.2	0	0	0	0	0	0.194647	0	0	0	0	0	0	0	0.359712	0	0	0	0	0.176367	0	0.0415489	0	0	0	0	0	0	0	0	0	0	0	0	0	0	0.10196	0	0
RPL23AP19	0	0	0	0	0	0	0	0	0	0	0	0	0	0	0	0	0	0	0	0	0.00830979	0	0	0	0	0	0	0	0	0	0	0	0	0	0	0.0113289	0	0
ENO1	62.3549	54.7256	70.2703	44.6809	56.0976	86.618	60.709	52.2388	95.7447	28.6252	29.5374	89.3525	74.5846	92.0863	46.5839	47.2222	66.6667	85.7143	75.8377	71.4583	92.5378	100	90	60.8696	56.3492	78.4785	37.4359	58.4	52.9412	78.9474	81.8308	87.5	84.6154	96	91.1765	97.9721	47.8873	58.7866
MIR6728	0	0	0	0	0	0	0	0	0	0	0	0	0	0	0	0	0	0	0	0	0	0	0	0	0	0	0	0	0	0	0	0	0	0	0	0.0113289	0	0
ENO1-AS1	0.66335	0.762195	0	0.425532	0	1.84915	0	0	0	0.188324	0.237248	0.28777	1.56403	0.359712	0.621118	0	0	1.19048	3.88007	0.416667	0.290843	0	0	0	0	0.700701	0	2.4	0	10.5263	2.08044	0	7.69231	0	1.47059	2.4697	0	0.83682
RNU6-304P	0	0	0	0	0	0	0	0	0	0	0	0	0	0	0	0	0	0	0.176367	0	0	0	0	0	0	0	0	0	0	0	0	0	0	0	0	0.0113289	0	0
HMGN2P17	0	0	0	0	0	0	0	0	0	0	0	0	0	0	0	0	0	0	0	0	0	0	0	0	0	0	0	0	0	0	0	0	0	0	0	0.0113289	0	0
AL139415.1	0.165837	0.152439	0	0	0	0.0486618	0	0	0	0	0	0	0	0	0	0	0	0	0	0	0	0	0	0	0	0	0	0	0	0	0	0	0	0	0	0	0	0
AL139415.2	0	0	0	0	0	0.0486618	0	0	0	0	0	0	0	0	0	0	0	0	0	0	0.00830979	0	0	0	0	0	0	0	0	0	0	0	0	0	0	0	0	0
CA6	0.165837	1.21951	0	0	0	0	0	0	0	0	0	0	0	0	0	0	0	0	0	0	0	0	0	0	0	0	0	0	0	0	0.138696	0	0	0	0	0.0793021	0	0
RN7SL451P	0	0	0	0	0	0.0486618	0	0	0	0	0	0	0	0	0	0	0	0	0	0	0	0	0	0	0	0	0	0	0	0	0	0	0	0	0	0	0	0
SLC2A7	0	0	0	0	0	0	0	0	0	0	0	0	0	0	0	0	0	0	0	0	0	0	0	0	0	0	0	0	0	0	0	0	0	0	0	0	0	0
SLC2A5	0.331675	0	1.35135	0	2.43902	0.437956	0	0	0	0.188324	0.118624	0.647482	0.293255	0.719424	0	0	0	2.38095	0.352734	0.208333	5.12714	0	0	0	1.5873	4.3043	0.512821	4.8	0	0	0.832178	0	0	0	0	0.611759	1.40845	0.209205
RF00424	0	0	0	0	0	0	0	0	0	0	0	0	0	0	0	0	0	0	0	0	0	0	0	0	0	0	0	0	0	0	0	0	0	0	0	0	0	0
GPR157	1.3267	1.82927	2.7027	8.93617	1.21951	7.73723	3.10192	1.49254	12.766	1.12994	0.711744	1.43885	4.69208	19.4245	1.24224	0	11.1111	0.793651	7.40741	3.33333	10.7362	0	20	0	0.793651	0.900901	0.512821	3.2	0	0	12.6214	25	23.0769	8	6.37255	21.6382	4.22535	2.30126
MIR34AHG	0.497512	0.762195	1.35135	4.68085	0	3.309	1.18168	0	0	0.188324	0.237248	0.215827	2.24829	1.43885	0.621118	0	0	0.396825	5.99647	0.416667	8.96626	0	10	0	0.793651	2.2022	1.53846	0.8	0	0	5.82524	12.5	0	0	2.45098	4.52022	1.40845	1.46444
MIR34A	0	0	0	0	0	0	0	0	0	0	0	0	0	0	0	0	0	0	0	0	0	0	0	0	0	0	0	0	0	0	0	0	0	0	0	0	0	0
LNCTAM34A	0	0.304878	0	0.425532	0	6.32603	0.590842	0	0	0.376648	0	0	1.17302	1.07914	0	2.77778	22.2222	0.793651	11.4638	0.208333	2.70899	0	0	0	0	1.2012	0	0	0	0	5.54785	0	0	0	3.43137	1.50674	0	0
H6PD	7.29685	6.70732	39.1892	30.6383	10.9756	31.7275	12.7031	10.4478	51.0638	22.5989	22.7758	15.3957	25.6109	16.5468	21.118	16.6667	55.5556	15.873	32.4515	31.0417	39.4798	87.5	40	12.3188	9.52381	18.8188	15.8974	9.6	17.6471	5.26316	41.3315	62.5	69.2308	16	29.4118	45.9273	19.7183	29.2887
SPSB1	1.82421	0.914634	37.8378	15.3191	0	14.0146	5.16987	10.4478	25.5319	2.63653	2.4911	0.503597	6.45161	0.359712	2.48447	19.4444	11.1111	0.396825	29.806	3.95833	7.5536	18.75	0	0	0.793651	1.001	2.5641	0.8	0	10.5263	12.7601	37.5	0	8	12.7451	16.3476	7.04225	5.64854
BX323043.1	0	0	0	0	0	0.0973236	0	0	0	0	0	0	0	0	0	0	0	0	0	0	0.00830979	0	0	0	0	0	0	0	0	0	0	0	0	0	0	0.0113289	0	0.209205
LINC02606	0	0	0	2.12766	0	0.389294	0.295421	0	0	0	0.355872	0.143885	0.391007	0	0	0	0	0	1.23457	0.833333	0.299152	0	0	0	0	0.2002	0.512821	0.8	0	0	0.416089	0	0	0	0.980392	0.215249	0	0.627615
RNA5SP40	0	0	0	0	0	0	0	0	0	0	0	0	0	0	0	0	0	0	0	0	0	0	0	0	0	0	0	0	0	0	0	0	0	0	0	0	0	0
AL928921.1	0	0	0	0	0	0	0	0	0	0	0	0	0	0	0	0	0	0	0	0	0	0	0	0	0	0	0	0	0	0	0	0	0	0	0	0	0	0
SLC25A33	6.13599	3.96341	12.1622	7.23404	6.09756	10.0243	9.15805	11.9403	27.6596	1.69492	2.37248	3.38129	10.4594	30.2158	6.21118	5.55556	11.1111	2.38095	22.3986	5.41667	30.9207	31.25	40	1.44928	7.14286	6.00601	6.66667	11.2	0	15.7895	21.2205	25	38.4615	24	13.2353	38.5295	5.6338	4.39331
AL954705.1	0	0	0	0.851064	0	0.0973236	0	0	0	0	0.118624	0.215827	0.391007	0.359712	0	0	0	0	0.352734	0	0.457038	0	0	0	0	0.2002	0	0	0	0	0	0	0	0	0	0.577773	0	0
TMEM201	0.497512	0.609756	5.40541	1.70213	3.65854	4.86618	2.06795	0	6.38298	1.12994	1.54211	1.15108	2.34604	2.15827	0.621118	0	11.1111	1.98413	5.29101	1.66667	3.1411	6.25	10	0.724638	2.38095	1.6016	2.5641	0.8	5.88235	10.5263	5.68655	0	7.69231	0	4.90196	8.75722	7.04225	1.88285
PIK3CD	15.9204	11.5854	2.7027	2.12766	9.7561	2.77372	7.53323	2.98507	0	0.753296	0.237248	17.554	2.8348	13.6691	1.86335	2.77778	0	13.8889	9.34744	2.5	11.293	31.25	10	25.3623	23.8095	15.8158	3.07692	5.6	35.2941	10.5263	3.32871	0	7.69231	0	5.39216	3.65923	2.8169	2.09205
PIK3CD-AS1	0	0.152439	0	0	0	0.0486618	0	0	0	0	0	0.28777	0	0.359712	0	0	0	0.396825	0	0	0.182815	0	0	0.724638	0	0.3003	0	0	0	0	0	0	0	0	0	0.0339866	0	0
AL691449.1	0	0.152439	0	0	0	0.0486618	0	0	0	0	0.118624	0	0.0977517	0	0	0	0	0.396825	0	0	0.00830979	0	0	0	0	0.1001	0	0	0	0	0	0	0	0	0	0	0	0
PIK3CD-AS2	0.829187	0.914634	2.7027	0.851064	1.21951	12.1168	3.10192	1.49254	2.12766	0	0.237248	0.215827	8.79765	0.719424	0.621118	2.77778	0	0	5.64374	0.208333	1.1883	12.5	10	0.724638	0.793651	0.800801	2.05128	5.6	0	5.26316	4.57698	0	0	0	4.90196	9.38031	5.6338	0.41841
CLSTN1	14.4279	9.7561	31.0811	17.4468	8.53659	57.5182	8.71492	16.4179	51.0638	22.7872	20.9964	9.78417	21.4076	16.5468	18.6335	22.2222	55.5556	9.12698	62.963	22.2917	16.5946	31.25	20	2.17391	16.6667	12.012	23.0769	13.6	17.6471	36.8421	48.5437	50	38.4615	12	29.4118	29.7949	21.1268	23.2218
MZT1P1	0	0	0	0	0	0	0	0	0	0	0	0	0	0	0	0	0	0	0	0	0	0	0	0	0	0	0	0	0	0	0.138696	0	0	0	0	0	0	0
AL357140.3	0	0	0	0	0	0	0	0	0	0	0	0	0	0	0	0	0	0	0.176367	0	0.0166196	0	0	0	0	0	0	0	0	0	0	0	0	0	0	0.226578	0	0
CTNNBIP1	9.95025	5.79268	10.8108	8.93617	3.65854	27.9805	10.7829	5.97015	31.9149	8.6629	8.54093	18.4173	33.4311	41.0072	12.4224	5.55556	11.1111	16.2698	20.4586	16.0417	30.5052	18.75	10	3.62319	10.3175	15.6156	9.23077	15.2	11.7647	26.3158	44.9376	37.5	69.2308	8	62.7451	68.6077	11.2676	18.2008
AL357140.1	0	0	0	0	0	0.0486618	0	0	0	0	0	0.0719424	0.0977517	0	0	0	0	0	0	0	0.00830979	0	0	0	0	0.1001	0	0	0	0	0	0	0	0	0	0.158604	0	0
AL357140.4	0	0	0	0	0	0	0	0	0	0	0	0.0719424	0	0	0	0	0	0	0.176367	0	0.0664783	0	0	0	0	0	0	0	0	0	0	0	0	0	0.980392	0.328537	0	0
LZIC	17.2471	15.3963	17.5676	16.5957	7.31707	30.1703	17.7253	11.9403	44.6809	13.936	15.5397	24.4604	20.5279	26.259	17.3913	27.7778	22.2222	21.8254	46.7372	19.1667	46.5847	37.5	30	4.34783	12.6984	24.4244	26.6667	19.2	29.4118	36.8421	33.2871	37.5	38.4615	28	24.0196	39.6397	16.9014	21.5481
AL357140.2	0.497512	0	0	0	0	0.145985	0.14771	0	0	0.188324	0	0.0719424	0.0977517	0.359712	0	0	0	0	0	0	0.124647	0	0	0	0.793651	0.1001	0	0	0	0	0	0	0	0	0	0.181262	0	0.209205
NMNAT1	1.99005	1.82927	2.7027	4.25532	3.65854	9.53771	3.54505	1.49254	21.2766	2.82486	4.15184	4.67626	4.00782	5.7554	4.96894	2.77778	0	3.96825	10.0529	7.29167	11.2182	25	10	3.62319	5.55556	5.50551	3.07692	0.8	11.7647	0	10.5409	0	0	8	6.37255	10.4452	5.6338	6.48536
RN7SKP269	0	0	0	0	0	0.0486618	0.14771	0	0	0	0	0	0	0	0	0	0	0	0	0	0.0581685	0	0	0	0	0	0	0	0	0	0	0	0	0	0	0.0566444	0	0.209205
TMEM274P	0	0	0	0	0	0	0	0	0	0	0	0	0	0	0	0	0	0	0	0	0	0	0	0	0	0.1001	0	0	0	0	0	0	0	0	0	0	0	0
MIR5697	0	0	0	0	0	0	0	0	0	0	0	0	0	0	0	0	0	0	0	0	0	0	0	0	0	0	0	0	0	0	0	0	0	0	0	0	0	0
AL603962.1	0	0	0	0	0	0	0	0	0	0	0	0	0	0	0	0	0	0	0	0	0	0	0	0	0	0	0	0	0	0	0	0	0	0	0	0	0	0
RBP7	1.65837	0.762195	1.35135	2.12766	0	6.90998	4.2836	1.49254	25.5319	1.50659	5.33808	48.4892	1.66178	2.8777	26.7081	30.5556	0	49.2063	3.88007	63.75	34.7931	37.5	20	10.8696	3.1746	37.4374	2.5641	1.6	0	0	5.82524	0	53.8462	0	0.980392	3.7272	1.40845	36.4017
UBE4B	7.13101	4.87805	6.75676	9.78723	8.53659	18.2482	6.49926	10.4478	23.4043	6.21469	6.64294	12.3741	15.5425	6.83453	7.45342	2.77778	22.2222	9.52381	19.5767	9.58333	18.6804	37.5	20	7.24638	9.52381	13.6136	18.4615	13.6	5.88235	15.7895	19.4175	12.5	30.7692	4	18.6275	32.2307	7.04225	10.8787
AL590639.1	0	0	0	0	0	0	0	0	0	0	0	0	0	0	0	0	0	0	0	0	0	0	0	0	0	0	0	0	0	0	0	0	0	0	0	0	0	0
PGAM1P11	0	0	0	0	0	0	0	0	0	0	0	0.0719424	0	0	0	0	0	0	0	0	0.0249294	0	10	0	0.793651	0	0	0	0	0	0	0	0	0	0	0.0679733	0	0
RNU6-828P	0	0	0	0	0	0	0	0	0	0	0	0	0	0	0	0	0	0	0	0	0	0	0	0	0	0	0	0	0	0	0	0	0	0	0	0.0339866	0	0
KIF1B	7.79436	6.25	13.5135	16.1702	4.87805	20.5353	7.0901	13.4328	44.6809	18.2674	21.2337	15.6835	15.347	12.5899	21.118	13.8889	33.3333	16.6667	23.6332	19.7917	30.9623	18.75	30	38.4058	7.14286	17.9179	30.7692	12	11.7647	26.3158	25.6588	62.5	38.4615	16	30.3922	40.4554	23.9437	21.1297
AL358013.1	0	0	0	0	0	0	0	0	0	0	0	0	0	0	0	0	0	0	0	0	0	0	0	0	0	0	0	0	0	0	0	0	0	0	0	0.0339866	0	0
RNU6-37P	0	0	0	0	0	0	0	0	0	0	0	0	0	0	0	0	0	0	0	0	0	0	0	0	0	0	0	0	0	0	0	0	0	0	0	0	0	0
RN7SL731P	0	0	0	0	0	0	0	0	0	0	0	0	0	0	0	0	0	0	0	0	0	0	0	0	0	0	0	0	0	0	0	0	0	0	0	0	0	0
AL139424.3	0	0.304878	0	0	1.21951	0.875912	0	0	0	0.753296	0.711744	0.143885	0.293255	0	0.621118	0	0	0.396825	0.529101	0.416667	0.249294	0	0	0	0	0.3003	0	0	0	5.26316	1.38696	12.5	0	0	0.490196	0.566444	0	0.627615
AL139424.2	0.165837	0.152439	0	0	1.21951	0.340633	0.14771	0	0	0	0.118624	0.143885	0.488759	0.359712	0.621118	0	0	0.793651	0.705467	0.833333	0.415489	0	10	0	0	0.800801	0.512821	0	0	0	0.693481	0	0	0	0	1.03093	0	0
PGD	6.96517	6.55488	25.6757	9.78723	10.9756	37.2263	22.0089	7.46269	40.4255	5.08475	7.11744	72.3022	23.1672	35.6115	9.31677	2.77778	22.2222	62.3016	31.0406	12.0833	86.9038	37.5	10	70.2899	14.2857	48.9489	6.15385	20.8	17.6471	84.2105	53.9528	75	53.8462	8	35.2941	66.3532	7.04225	9.62343
AL139424.1	0	0	0	0	0	0.0486618	0	0	0	0	0	0	0	0	0	0	0	0	0.176367	0	0.0166196	0	0	0	0	0	0	0	0	0	0	0	0	0	0	0.147275	0	0
CENPS-CORT	0.165837	0.152439	0	0	0	0.0973236	0.14771	0	0	0	0.118624	0	0.293255	0	0	0	0	0	0.881834	0.625	0.0830979	0	0	0	0	0.1001	0	0	0	0	0.832178	0	0	0	0	0.815679	0	0
CENPS	1.99005	1.06707	1.35135	3.82979	3.65854	7.29927	1.4771	2.98507	8.51064	1.31827	0.948992	0.719424	5.76735	3.95683	3.10559	0	0	1.5873	33.8624	2.5	4.0718	6.25	0	0	0	0.900901	3.07692	4.8	5.88235	5.26316	12.6214	25	7.69231	4	11.7647	20.0748	2.8169	3.13808
CORT	0	0	0	0	0	0.145985	0	0	0	0	0	0	0	0	0	0	0	0	0	0.625	0.0166196	0	0	0	0	0	0	0	0	0	0.138696	0	0	0	0	0.181262	0	0.209205
DFFA	8.29187	7.0122	17.5676	10.2128	3.65854	26.5693	14.6233	16.4179	59.5745	12.9944	11.981	10.6475	19.1593	12.9496	20.4969	11.1111	22.2222	13.0952	27.3369	21.875	32.2087	56.25	30	2.89855	10.3175	11.6116	13.3333	9.6	41.1765	5.26316	27.6006	50	15.3846	16	31.3725	46.4597	11.2676	22.1757
AL354956.1	0	0	0	0	0	0.291971	0.14771	0	0	0	0	0.0719424	0	0	0	0	0	0	0.176367	0	0.0664783	0	0	0	0	0	0	0	0	0	0	0	0	0	0	0.158604	0	0.209205
PEX14	4.14594	2.43902	12.1622	2.97872	2.43902	9.24574	6.79468	8.95522	21.2766	2.63653	3.91459	3.02158	4.20332	7.19424	4.34783	5.55556	0	2.77778	25.2205	5	30.7878	43.75	10	0.724638	4.7619	2.8028	4.10256	2.4	5.88235	15.7895	12.6214	0	15.3846	4	12.7451	15.6225	7.04225	4.1841
RN7SL614P	0	0	0	0	0	0.0486618	0	0	0	0	0	0	0	0	0	0	0	0	0	0	0.0914077	0	0	0	0	0	0	0	0	0	0	0	0	0	0	0.0339866	0	0
CASZ1	4.31177	2.89634	2.7027	3.40426	4.87805	32.7981	1.92024	5.97015	17.0213	30.1318	30.1305	1.58273	27.7615	3.59712	31.677	8.33333	0	0.396825	65.7848	8.95833	6.64783	6.25	30	3.62319	5.55556	1.4014	4.10256	2.4	0	31.5789	39.1123	75	46.1538	8	48.0392	52.9512	2.8169	17.364
AL139423.1	0.165837	0.152439	0	0	0	0.437956	0	1.49254	0	0.753296	0.118624	0.0719424	0.195503	0	0	0	0	0	1.5873	0.416667	0.0830979	0	0	0	0.793651	0.1001	0	0	0	0	0.554785	0	0	0	0.490196	0.770364	0	0.209205
HSPE1P24	0	0	0	0	0	0	0	0	0	0	0	0	0	0	0	0	0	0	0	0	0	0	0	0	0	0	0	0	0	0	0	0	0	0	0	0	0	0
C1orf127	0	0	1.35135	0	0	0.0486618	0	0	0	0	0	0	0.488759	0	0	0	0	0	0	0	1.20492	0	0	0	0	0.500501	0	0	0	0	0.277393	0	0	0	0.490196	1.07624	0	0
CFL1P6	0	0	0	0	0	0	0	0	0	0	0	0	0	0	0	0	0	0	0	0	0.00830979	0	0	0	0	0	0	0	0	0	0	0	0	0	0.490196	0.0339866	0	0
TARDBP	19.9005	17.378	13.5135	17.4468	14.6341	35.8151	15.6573	19.403	51.0638	12.806	17.3191	18.705	29.8143	23.0216	21.118	11.1111	33.3333	19.4444	40.9171	21.0417	34.1782	37.5	30	2.89855	28.5714	23.023	14.8718	18.4	11.7647	31.5789	45.3537	50	38.4615	40	30.3922	56.3838	21.1268	23.6402
AL109811.3	0	0	0	0	0	0.0486618	0	0	0	0	0	0.0719424	0	0	0	0	0	0	0.176367	0	0.0415489	0	0	0	0	0	0	0	0	0	0	0	0	0	0	0.0453155	0	0
MASP2	0	0	0	0	0	0.0486618	0	0	0	0	0	0	0	0	0	0	0	0	0	0	0	0	0	0	0	0	0	0	0	0	0.138696	0	0	0	0	0.0453155	0	0
AL109811.2	0.995025	0.457317	1.35135	1.2766	0	3.40633	0.886263	0	0	0.376648	0.948992	0.431655	1.56403	0.359712	1.24224	0	0	0.396825	1.5873	1.25	0.465348	0	0	0.724638	0.793651	0.800801	0.512821	1.6	0	0	1.80305	0	0	4	0.980392	1.40478	1.40845	2.30126
SRM	21.5589	19.9695	55.4054	23.8298	14.6341	27.1046	26.4402	23.8806	78.7234	8.47458	10.083	19.4245	17.3021	40.6475	20.4969	8.33333	44.4444	22.619	22.2222	32.5	55.2518	62.5	40	6.52174	15.0794	25.8258	12.3077	67.2	35.2941	78.9474	38.4189	50	69.2308	72	24.5098	59.7712	21.1268	20.5021
EXOSC10	7.62852	8.38415	8.10811	8.08511	10.9756	18.8321	9.60118	8.95522	34.0426	8.28625	10.083	8.70504	14.2717	13.6691	10.559	2.77778	44.4444	6.34921	29.6296	11.875	24.5887	18.75	20	0.724638	10.3175	11.8118	6.66667	13.6	0	42.1053	22.8849	25	38.4615	16	21.5686	30.1688	12.6761	12.5523
AL109811.1	0.165837	0.152439	0	0	0	0.340633	0	0	0	0.188324	0.237248	0	0.0977517	0	0	0	0	0	1.5873	0	0.182815	0	0	0	0	0.1001	0.512821	0	0	0	0.277393	0	0	0	0	0.226578	0	0
EXOSC10-AS1	0.165837	0	0	0	0	0.681265	0.443131	0	0	0	0	0.28777	0.195503	1.43885	0	0	0	0	3.1746	0.208333	2.44308	0	0	0	0	0.3003	0	0	0	10.5263	0.832178	0	7.69231	0	0.490196	1.73332	0	0.41841
MTOR	6.13599	4.11585	9.45946	4.25532	2.43902	11.3869	4.87445	2.98507	23.4043	5.46139	6.52432	6.04317	7.72239	9.71223	7.45342	8.33333	11.1111	11.1111	11.1111	6.25	13.8109	18.75	0	0.724638	9.52381	6.10611	7.69231	8.8	5.88235	5.26316	15.8114	25	7.69231	28	10.2941	24.5383	4.22535	7.94979
MTOR-AS1	0	0	0	0	0	0	0	0	0	0	0	0	0	0	0	0	0	0	0	0	0	0	0	0	0	0	0	0	0	0	0	0	0	0	0	0.0113289	0	0
RNU6-537P	0	0	0	0	0	0	0	0	0	0	0.118624	0	0	0	0	0	0	0	0	0	0	0	0	0	0	0	0	0	0	0	0	0	0	0	0	0.0113289	0	0
ANGPTL7	0	0	0	1.70213	0	0	0	0	0	0.188324	0.237248	0	0	0	0.621118	0	0	0	0	0.208333	0.0498587	6.25	0	0	0	0	0	0	0	0	0.138696	0	0	0	6.86275	0.10196	0	0
RNU6-291P	0	0	0	0	0	0	0	0	0	0	0	0	0	0	0	0	0	0	0	0	0	0	0	0	0	0	0	0	0	0	0	0	0	0	0	0	0	0
RPL39P6	0	0	0	0	0	0	0	0	0	0	0	0	0	0	0	0	0	0	0	0	0.00830979	0	0	0	0	0	0	0	0	0	0.138696	0	0	0	0	0	0	0
UBIAD1	6.6335	4.87805	6.75676	4.25532	6.09756	11.4842	5.02216	7.46269	34.0426	5.27307	5.9312	3.45324	7.33138	8.63309	5.59006	8.33333	0	5.55556	10.582	6.25	13.5283	31.25	10	0.724638	5.55556	6.60661	6.15385	9.6	11.7647	21.0526	12.344	25	15.3846	16	11.2745	26.1244	9.85915	7.53138
UBE2V2P3	0.165837	0	0	0	0	0	0	0	0	0	0	0	0	0	0	0	0	0	0	0	0.00830979	0	0	0	0	0	0	0	0	0	0.138696	0	0	0	0	0.0339866	0	0
AL031291.1	0	0	0	0	0	0.145985	0	0	0	0.188324	0	0	0	0	0.621118	0	0	0	0	0	0	0	0	0	0	0	0	0	0	0	0	0	0	0	0	0	0	0
MTCYBP45	0	0	0	0	0	0	0	0	0	0	0	0	0	0	0	0	0	0	0	0	0	0	0	0	0	0	0	0	0	0	0	0	0	0	0	0	0	0
DISP3	0	0	0	0	0	0.0486618	0	0	0	0	0.118624	0	0	0	0	0	0	0	0	0	0	0	0	0	0	0.1001	0	0	0	0	0	0	0	0	0	0.0226578	0	0.209205
AL590989.1	0	0	0	0	0	0	0	0	0	0	0	0	0	0	0	2.77778	0	0	0	0	0	0	0	0	0	0.1001	0	0	0	0	0	0	0	0	0	0	0	0
LINC01647	0	0	0	0	0	0	0	0	0	0	0.118624	0	0	0	0	0	0	0	0	0	0.00830979	0	0	0	0	0	0	0	0	0	0	0	0	0	0	0	0	0
AL031731.1	0	0.152439	0	0.425532	1.21951	0.632603	0	0	0	0	0	0.0719424	0	0	0	0	0	0	0	0.208333	0.0332392	0	0	0	0	0	0	0	0	0	0.277393	0	0	0	0	0.215249	0	0
FBXO2	5.97015	4.26829	9.45946	6.80851	3.65854	32.6034	0.14771	0	0	0.753296	0.59312	0.359712	10.4594	3.59712	0	8.33333	0	0	41.0935	1.45833	0.473658	87.5	10	0	6.34921	0.3003	1.53846	9.6	0	21.0526	18.0305	12.5	7.69231	12	22.0588	22.8164	4.22535	1.04603
FBXO44	7.62852	3.81098	8.10811	7.65957	6.09756	9.97567	2.21566	7.46269	2.12766	0.188324	1.06762	1.65468	5.6696	6.83453	4.34783	8.33333	0	2.77778	9.17108	2.5	4.65348	12.5	0	0	8.73016	2.002	2.5641	8	11.7647	5.26316	9.01526	0	0	4	9.80392	9.32367	7.04225	2.71967
FBXO6	9.45274	3.35366	8.10811	2.12766	4.87805	6.86131	5.46529	0	2.12766	1.88324	4.38909	5.82734	4.10557	21.223	8.69565	2.77778	11.1111	5.15873	29.1005	3.75	31.9096	25	0	3.62319	14.2857	5.50551	2.05128	14.4	11.7647	5.26316	11.0957	12.5	0	4	10.7843	19.8482	2.8169	3.76569
MAD2L2	16.7496	9.29878	18.9189	10.6383	10.9756	13.7713	6.94239	4.47761	42.5532	12.9944	11.1507	14.4604	9.18866	24.4604	19.2547	13.8889	0	10.7143	8.99471	18.9583	18.8549	37.5	10	2.89855	22.2222	14.7147	1.53846	26.4	11.7647	5.26316	13.1761	0	38.4615	20	13.7255	25.5579	11.2676	19.2469
DRAXIN	2.15589	0.304878	0	0	0	0.0486618	0	0	0	0	0.355872	0.431655	0	0.359712	0	0	0	0	0.352734	0.208333	0.216055	0	0	0	3.1746	0.4004	0.512821	0.8	0	0	0.277393	0	0	0	0	0.237906	0	0.209205
AGTRAP	23.0514	15.7012	36.4865	22.1277	6.09756	22.5791	39.8818	10.4478	51.0638	22.7872	19.6916	60.1439	17.0088	24.8201	24.8447	38.8889	33.3333	51.1905	57.1429	32.5	64.11	87.5	40	50.7246	40.4762	42.8428	12.8205	9.6	5.88235	15.7895	27.3232	12.5	23.0769	20	35.7843	54.3673	16.9014	26.1506
C1orf167	0.497512	0.152439	4.05405	0.425532	0	0.291971	0.14771	0	4.25532	1.31827	1.77936	0.143885	1.27077	0.359712	1.24224	2.77778	0	0	0.529101	1.66667	0.0997175	6.25	0	2.17391	0	0.4004	0	0	0	0	0.832178	12.5	0	0	39.7059	32.7065	0	1.46444
AL953897.1	0	0	0	0	0	0	0	0	0	0	0	0	0	0	0	0	0	0	0	0	0.0166196	0	0	0	0	0	0	0	0	0	0	0	0	0	0	0.0339866	0	0
MTHFR	8.95522	5.4878	32.4324	17.0213	14.6341	18.6375	8.86263	17.9104	23.4043	13.371	16.6074	21.223	17.8886	38.4892	25.4658	16.6667	33.3333	21.0317	19.4004	15.625	25.1787	18.75	20	5.07246	12.6984	26.6266	12.8205	8.8	11.7647	5.26316	26.7684	50	23.0769	20	30.3922	53.4723	18.3099	17.5732
CLCN6	2.15589	2.28659	6.75676	5.10638	2.43902	5.69343	4.2836	4.47761	10.6383	2.82486	3.44009	6.40288	6.15836	7.91367	5.59006	5.55556	11.1111	4.36508	14.6384	5.41667	13.1959	18.75	30	4.34783	1.5873	8.70871	4.10256	4	11.7647	10.5263	7.4896	37.5	0	4	12.2549	25.1161	4.22535	4.60251
RF02156	0	0	0	0	0	0	0	0	0	0	0	0	0	0	0	0	0	0	0	0	0	0	0	0	0	0	0	0	0	0	0	0	0	0	0	0	0	0
RF02157	0	0	0	0	0	0	0	0	0	0	0	0	0	0	0	0	0	0	0	0	0	0	0	0	0	0	0	0	0	0	0	0	0	0	0	0	0	0
NPPA	0	0	0	0	0	0	0	0	0	0	0	0	0	0	0	0	0	0	0	0	0.00830979	0	0	0	0	0	0	0	0	0	0	0	0	4	0	0.0339866	0	0
RF02158	0	0	0	0	0	0	0	0	0	0	0	0	0	0	0	0	0	0	0	0	0	0	0	0	0	0	0	0	0	0	0	0	0	0	0	0	0	0
NPPB	0	0	0	0	0	0	0	0	0	0	0	0	0	0	0	0	0	0	0	0	0.0166196	0	0	0	0	0	0	0	0	0	0	0	0	0	0	0	0	0
AL021155.1	0	0	0	0	0	0	0	0	0	0	0	0	0	0	0	0	0	0	0	0	0	0	0	0	0	0	0	0	0	0	0	0	0	0	0	0	0	0
AL021155.2	1.65837	0.762195	0	0.851064	1.21951	1.16788	1.32939	1.49254	2.12766	0.376648	0.118624	1.07914	0.293255	2.8777	0.621118	0	0	0.396825	2.1164	0.416667	1.12182	0	0	0	1.5873	0.900901	0	5.6	0	0	0.693481	0	0	0	1.47059	1.23485	0	0.41841
RNU5E-1	0	0	0	0	0	0	0	0	0	0	0	0	0	0	0	0	0	0	0	0	0	0	0	0	0	0	0	0	0	0	0	0	0	0	0	0	0	0
RNU5E-4P	0.66335	0	0	0.425532	0	0.194647	0.295421	0	0	0	0	0.215827	0.0977517	0.359712	0	0	0	0.396825	0.176367	0	0.216055	0	0	0	0.793651	0.2002	0	0	5.88235	0	0.416089	0	0	0	0	0.589102	0	0.41841
KIAA2013	15.5887	7.77439	21.6216	10.6383	9.7561	24.0876	20.6795	20.8955	44.6809	19.5857	19.4543	20.6475	18.6706	32.0144	24.8447	13.8889	33.3333	19.0476	40.7407	18.9583	58.8832	50	20	18.8406	16.6667	24.024	14.359	32.8	17.6471	36.8421	37.7254	37.5	46.1538	16	31.3725	38.6088	12.6761	24.2678
PLOD1	2.6534	1.21951	12.1622	5.53191	1.21951	9.87835	3.39734	5.97015	34.0426	6.59134	9.72716	12.0144	5.76735	7.91367	11.8012	2.77778	22.2222	9.92063	7.40741	8.75	25.3532	25	0	4.34783	5.55556	12.1121	35.8974	11.2	0	5.26316	10.1248	25	7.69231	20	10.2941	24.2551	19.7183	10.251
MFN2	5.47264	3.96341	4.05405	3.40426	6.09756	14.5985	7.23781	17.9104	38.2979	4.51977	7.47331	11.5827	10.9482	10.7914	9.31677	0	11.1111	13.8889	15.6966	10.625	24.4142	31.25	10	13.0435	7.93651	14.5145	8.71795	4	0	21.0526	16.9209	0	38.4615	4	23.5294	36.0145	7.04225	7.94979
AL096840.1	0	0	0	0	0	0	0	0	0	0	0	0	0	0	0	0	0	0	0	0	0	0	0	0	0	0	0	0	0	0	0	0	0	0	0	0	0	0
MIIP	8.29187	7.0122	20.2703	5.53191	17.0732	8.61314	26.7356	7.46269	14.8936	3.9548	5.69395	13.741	9.09091	21.223	9.93789	5.55556	11.1111	12.6984	14.1093	8.125	54.2712	37.5	50	6.52174	11.9048	14.3143	6.66667	10.4	29.4118	0	13.8696	25	23.0769	20	15.1961	25.5466	12.6761	6.48536
RF00019-3	0	0	0	0	0	0	0.14771	0	0	0	0	0	0	0	0	0	11.1111	0	0	0	0.00830979	0	0	0	0	0	0	0	0	0	0	0	0	0	0	0	0	0
MIR6729	0	0	0	0	0	0	0	0	0	0	0	0	0	0	0	0	0	0	0	0	0	0	0	0	0	0	0	0	0	0	0	0	0	0	0	0	0	0
RN7SL649P	0	0	0	0	0	0	0	0	0	0	0	0	0	0	0	0	0	0	0	0	0	0	0	0	0	0	0	0	0	0	0	0	0	0	0	0	0	0
TNFRSF8	0	0	1.35135	0	0	0.291971	0.295421	0	0	0	0.711744	4.96403	0.195503	0.719424	8.69565	0	0	3.96825	0	3.75	0.373941	6.25	10	0.724638	0	5.40541	0.512821	0	0	0	0	0	0	0	0	0.158604	1.40845	2.71967
RNU6-777P	0	0	0	0	0	0	0	0	0	0	0	0	0	0	0	0	0	0	0	0	0	0	0	0	0	0	0	0	0	0	0	0	0	0	0	0	0	0
RPL23AP89	0	0	0	0	0	0	0	0	0	0	0	0	0	0	0	0	0	0	0	0	0.00830979	0	10	0	0	0	0	0	0	0	0.138696	0	0	0	0	0.0226578	0	0
AL357835.1	0	0	0	0	0	0	0	0	0	0	0	0	0	0	0	0	0	0	0	0	0	0	0	0	0	0	0	0	0	0	0	0	0	0	0	0.0226578	0	0
MIR7846	0.165837	0	0	0	0	0	0	0	0	0	0	0	0	0	0	0	0	0	0	0	0	0	0	0	0	0	0	0	0	0	0	0	0	0	0	0	0	0
TNFRSF1B	43.2836	30.1829	5.40541	13.1915	3.65854	8.95377	5.02216	2.98507	51.0638	9.79284	22.0641	79.3525	6.94037	64.7482	44.0994	2.77778	22.2222	84.5238	5.11464	51.4583	34.5937	18.75	20	64.4928	39.6825	77.3774	12.3077	7.2	41.1765	10.5263	13.8696	0	23.0769	4	3.43137	12.1899	8.4507	37.8661
MIR4632	0	0	0	0	0	0	0	0	0	0	0	0	0	0	0	0	0	0	0	0	0	0	0	0	0	0	0	0	0	0	0	0	0	0	0	0	0	0
RPL10P17	0.165837	0	0	0	0	0	0	0	0	0	0	0	0	0	0	0	0	0	0	0	0	0	0	0	0	0	0	0	0	0	0	0	0	0	0	0.0113289	0	0
RF00156	0	0	0	0	0	0	0	0	0	0	0	0	0	0	0	0	0	0	0	0	0	0	0	0	0	0	0	0	0	0	0	0	0	0	0	0	0	0
VPS13D	9.2869	10.5183	13.5135	11.9149	7.31707	36.6423	11.3737	20.8955	31.9149	12.806	12.8114	14.8201	43.7928	9.71223	14.9068	16.6667	11.1111	14.2857	26.6314	21.25	20.6415	31.25	20	7.24638	11.1111	13.9139	18.9744	10.4	0	21.0526	40.3606	62.5	38.4615	24	34.8039	48.329	9.85915	20.5021
SNORA59A	0	0	0	0	0	0	0	0	0	0	0	0	0	0	0	0	0	0	0	0	0	0	0	0	0	0	0	0	0	0	0	0	0	0	0	0	0	0
AC243836.1	0	0	0	0	0	0.0486618	0	0	0	0	0	0	0	0	0	0	0	0	0	0	0.108027	0	0	0	0	0	0	0	0	0	0	0	0	0	0	0	0	0.209205
DHRS3	8.95522	10.8232	36.4865	24.6809	3.65854	64.7202	9.8966	10.4478	10.6383	30.8851	23.962	3.66906	65.1026	16.1871	25.4658	5.55556	44.4444	2.38095	50.0882	20.4167	67.1265	37.5	40	0	37.3016	14.4144	8.71795	8.8	0	10.5263	67.8225	87.5	38.4615	4	41.6667	64.4047	5.6338	28.0335
RNU6ATAC18P	0	0	0	0	0	0	0	0	0	0	0	0	0	0	0	0	0	0	0.176367	0	0.0166196	0	0	0	0	0	0	0	0	0	0	0	0	0	0	0.0226578	0	0
MIR6730	0	0	0	0	0	0	0	0	0	0	0	0	0	0	0	0	0	0	0	0	0	0	0	0	0	0	0	0	0	0	0	0	0	0	0	0	0	0
AC254633.1	0	0.152439	2.7027	0.851064	0	0.778589	0.14771	0	0	0.376648	0.118624	0	2.15054	0.359712	0	0	0	0	1.23457	0	0.473658	0	0	0	0.793651	0	0	0	0	0	2.63523	0	0	0	0.490196	0.543786	0	0
AADACL4	0	0	0	0	0	0.0486618	0	0	0	0	0	0	0.0977517	0	0	0	0	0	0.176367	0	0	0	0	0	0	0	0	0	0	0	0	0	0	0	0	0	0	0
AC244670.1	0	0	0	0	0	0	0	0	0	0	0	0	0	0	0	0	0	0	0	0	0	0	0	0	0	0	0	0	0	0	0	0	0	0	0	0	0	0
AADACL3	0	0	0	0	0	0	0	0	0	0	0	0	0	0	0	0	0	0	0	0	0	0	0	0	0	0	0	0	0	0	0	0	0	0	0	0	0	0
C1orf158	0	0	0	0	0	0.0486618	0	0	0	0.188324	0.118624	0	0.293255	0	0	0	0	0	59.612	0.208333	0.0415489	0	0	0.724638	0	0	0	0	0	0	0.832178	0	0	0	0	0.215249	0	0.209205
PRAMEF12	0	0	0	0	0	0	0	0	0	0	0	0	0	0	0	0	0	0	0	0	0	0	0	0	0	0	0	0	0	0	0	0	0	0	0	0	0	0
PRAMEF1	0	0	0	0	0	0	0	0	0	0	0	0	0	0	0	0	0	0	0	0	0	0	0	0	0	0	0	0	0	0	0	0	0	0	0	0.0113289	0	0
LINC01784	0	0	0	0	0	0	0	0	0	0	0	0	0	0	0	0	0	0	0	0	0	0	0	0	0	0	0	0	0	0	0	0	0	0	0	0	0	0
PRAMEF11	0	0	0	0	0	0	0	0	0	0	0	0	0	0	0	0	0	0	0	0	0	0	0	0	0	0	0	0	0	0	0	0	0	0	0	0	0	0
PRAMEF30P	0	0	0	0	0	0	0	0	0	0	0	0	0	0	0	0	0	0	0	0	0	0	0	0	0	0	0	0	0	0	0	0	0	0	0	0	0	0
HNRNPCL1	0	0	0	0	0	0	0	0	0	0	0	0	0	0	0	0	0	0	0	0	0.00830979	0	0	0	0	0	0	0	0	0	0	0	0	0	0	0	0	0
PRAMEF2	0	0	0	0	0	0	0	0	0	0	0	0	0	0	0	0	0	0	0	0	0	0	0	0	0	0	0	0	0	0	0	0	0	0	0	0	0	0
PRAMEF4	0	0	0	0	0	0	0	0	0	0	0	0	0	0	0	0	0	0	0	0	0	0	0	0	0	0	0	0	0	0	0	0	0	0	0	0	0	0
PRAMEF10	0	0	0	0	0	0	0	0	0	0	0	0	0	0	0	0	0	0	0	0	0	0	0	0	0	0	0	0	0	0	0	0	0	0	0	0	0	0
PRAMEF7	0	0	0	0	0	0	0	0	0	0	0	0	0	0	0	0	0	0	0	0	0	0	0	0	0	0	0	0	0	0	0	0	0	0	0	0	0	0
RNU6-1072P	0	0	0	0	0	0	0	0	0	0	0	0	0	0	0	0	0	0	0	0	0	0	0	0	0	0	0	0	0	0	0	0	0	0	0	0	0	0
PRAMEF29P	0	0	0	0	0	0	0	0	0	0	0	0	0	0	0	0	0	0	0	0	0	0	0	0	0	0	0	0	0	0	0	0	0	0	0	0	0	0
PRAMEF6	0	0	0	0	0	0	0	0	0	0	0	0	0	0	0	0	0	0	0	0	0	0	0	0	0	0	0	0	0	0	0	0	0	0	0	0	0	0
PRAMEF28P	0	0	0	0	0	0	0	0	0	0	0	0	0	0	0	0	0	0	0	0	0	0	0	0	0	0	0	0	0	0	0	0	0	0	0	0	0	0
PRAMEF27	0	0	0	0	0	0	0	0	0	0	0	0	0	0	0	0	0	0	0	0	0	0	0	0	0	0	0	0	0	0	0	0	0	0	0	0	0	0
HNRNPCL3	0	0	0	0	0	0	0	0	0	0	0	0	0	0	0	0	0	0	0	0	0	0	0	0	0	0	0	0	0	0	0	0	0	0	0	0	0	0
PRAMEF25	0	0	0	0	0	0	0	0	0	0	0	0	0	0	0	0	0	0	0	0	0	0	0	0	0	0	0	0	0	0	0	0	0	0	0	0	0	0
PRAMEF34P	0	0	0	0	0	0	0	0	0	0	0	0	0	0	0	0	0	0	0	0	0	0	0	0	0	0	0	0	0	0	0	0	0	0	0	0	0	0
PRAMEF35P	0	0	0	0	0	0	0	0	0	0	0	0	0	0	0	0	0	0	0	0	0	0	0	0	0	0	0	0	0	0	0	0	0	0	0	0	0	0
HNRNPCL2	0	0	0	0	0	0	0	0	0	0	0	0	0	0	0	0	0	0	0	0	0	0	0	0	0	0	0	0	0	0	0	0	0	0	0	0	0	0
PRAMEF36P	0	0	0	0	0	0	0	0	0	0	0	0	0	0	0	0	0	0	0	0	0	0	0	0	0	0	0	0	0	0	0	0	0	0	0	0	0	0
AC245056.1	0	0	0	0	0	0	0	0	0	0	0	0	0	0	0	0	0	0	0	0	0	0	0	0	0	0	0	0	0	0	0	0	0	0	0	0	0	0
PRAMEF26	0	0	0	0	0	0	0	0	0	0	0	0	0	0	0	0	0	0	0	0	0	0	0	0	0	0	0	0	0	0	0	0	0	0	0	0	0	0
HNRNPCL4	0	0	0	0	0	0	0	0	0	0	0	0	0	0	0	0	0	0	0	0	0	0	0	0	0	0	0	0	0	0	0	0	0	0	0	0.0113289	0	0
PRAMEF9	0	0	0	0	0	0	0	0	0	0	0	0	0	0	0	0	0	0	0	0	0	0	0	0	0	0	0	0	0	0	0	0	0	0	0	0	0	0
PRAMEF13	0	0	0	0	0	0	0	0	0	0	0	0	0	0	0	0	0	0	0	0	0	0	0	0	0	0	0	0	0	0	0	0	0	0	0	0	0	0
PRAMEF18	0	0	0	0	0	0	0	0	0	0	0	0	0	0	0	0	0	0	0	0	0	0	0	0	0	0	0	0	0	0	0	0	0	0	0	0	0	0
PRAMEF31P	0	0	0	0	0	0	0	0	0	0	0	0	0	0	0	0	0	0	0	0	0	0	0	0	0	0	0	0	0	0	0	0	0	0	0	0	0	0
PRAMEF5	0	0	0	0	0	0	0	0	0	0	0	0	0	0	0	0	0	0	0	0	0	0	0	0	0	0	0	0	0	0	0	0	0	0	0	0	0	0
PRAMEF32P	0	0	0	0	0	0	0	0	0	0	0	0	0	0	0	0	0	0	0	0	0	0	0	0	0	0	0	0	0	0	0	0	0	0	0	0	0	0
RNU6-771P	0	0	0	0	0	0	0	0	0	0	0	0	0	0	0	0	0	0	0	0	0	0	0	0	0	0	0	0	0	0	0	0	0	0	0	0	0	0
PRAMEF8	0	0	0	0	0	0	0	0	0	0	0	0	0	0	0	0	0	0	0	0	0	0	0	0	0	0	0	0	0	0	0	0	0	0	0	0	0	0
PRAMEF33	0	0	0	0	0	0	0	0	0	0	0	0	0	0	0	0	0	0	0	0	0	0	0	0	0	0	0	0	0	0	0	0	0	0	0	0	0	0
PRAMEF15	0	0	0	0	0	0	0	0	0	0	0	0	0	0	0	0	0	0	0	0	0	0	0	0	0	0	0	0	0	0	0	0	0	0	0	0	0	0
AC243961.1	0	0	0	0	0	0	0	0	0	0	0	0	0	0	0	0	0	0	0	0	0	0	0	0	0	0	0	0	0	0	0	0	0	0	0	0	0	0
PRAMEF14	0	0	0	0	0	0	0	0	0	0	0	0	0	0	0	0	0	0	0	0	0	0	0	0	0	0	0	0	0	0	0	0	0	0	0	0	0	0
PRAMEF19	0	0	0	0	0	0	0	0	0	0	0	0	0	0	0	0	0	0	0	0	0	0	0	0	0	0	0	0	0	0	0	0	0	0	0	0	0	0
PRAMEF17	0	0	0	0	0	0	0	0	0	0	0	0	0	0	0	0	0	0	0	0	0	0	0	0	0	0	0	0	0	0	0	0	0	0	0	0	0	0
PRAMEF20	0	0	0	0	0	0	0	0	0	0	0	0	0	0	0	0	0	0	0	0	0	0	0	0	0	0	0	0	0	0	0	0	0	0	0	0	0	0
LRRC38	0	0	0	0	0	0	0	0	0	0	0	0	0	0	0	0	0	0	0	0	0	0	10	0	0	0	0	0	0	0	0	0	0	0	0	0	0	0
AL354712.1	0	0	0	0	0	0	0	0	0	0	0	0	0	0	0	0	0	0	0	0	0	0	0	0	0	0	0	0	0	0	0	0	0	0	0	0	0	0
BRWD1P1	0	0	0	0	0	0	0	0	0	0	0	0	0	0	0	0	0	0	0	0	0	0	0	0	0	0	0	0	0	0	0	0	0	0	0	0	0	0
PDPN	1.16086	0.457317	40.5405	19.1489	0	21.7518	0.14771	1.49254	2.12766	0.376648	0.59312	0.28777	4.98534	1.79856	0.621118	47.2222	11.1111	0	2.6455	0.416667	1.1883	87.5	40	0	0	0.900901	0.512821	0.8	0	0	1.66436	0	0	0	50.4902	6.62739	0	0.627615
RNA5SP41	0	0	0	0	0	0	0	0	0	0	0	0	0	0	0	0	0	0	0	0	0	0	0	0	0	0	0	0	0	0	0	0	0	0	0	0	0	0
AL359771.1	0	0	0	0	0	0	0	0	0	0	0	0	0	0	0	0	0	0	0	0	0	0	0	0	0	0	0	0	0	0	0	0	0	0	0	0	0	0
RF00564	0	0	0	0	0	0	0	0	0	0	0	0	0	0	0	0	0	0	0	0	0	0	0	0	0	0	0	0	0	0	0	0	0	0	0	0	0	0
PRDM2	28.1924	23.7805	31.0811	27.6596	45.122	38.0535	20.384	22.3881	31.9149	22.4105	24.6738	21.223	30.1075	26.6187	21.118	8.33333	66.6667	25.3968	53.0864	23.75	40.7512	37.5	30	21.7391	27.7778	29.029	24.1026	30.4	29.4118	47.3684	42.4411	50	53.8462	12	35.2941	49.4392	25.3521	25.3138
KAZN	1.16086	0.914634	22.973	17.0213	6.09756	16.983	7.68095	34.3284	27.6596	3.20151	9.60854	0.503597	2.34604	0.719424	9.93789	0	22.2222	0.396825	36.6843	7.70833	24.8463	31.25	30	5.7971	2.38095	0.3003	36.4103	3.2	0	73.6842	21.914	25	30.7692	4	14.2157	6.45746	30.9859	13.5983
RNU6-1265P	0	0	0	0	0	0	0	0	0	0	0	0	0	0	0	0	0	0	0	0	0	0	0	0	0	0	0	0	0	0	0	0	0	0	0	0	0	0
AL357873.1	0	0	1.35135	0	0	0	0	0	0	0	0	0	0	0	0	0	0	0	0	0	0	0	0	0	0	0	0	0	0	0	0	0	0	0	0	0	0	0
KAZN-AS1	0	0	0	0	0	0.0486618	0	0	0	0	0	0	0	0	0	0	0	0	0	0	0	0	0	0	0	0	0	0	0	0	0	0	0	0	0	0	0	0
TBCAP2	0	0	0	0.425532	0	0.243309	0	0	0	0	0	0	0	0	0	0	0	0	0.176367	0	0	0	0	0	0	0	0	0	0	0	0.138696	0	0	0	0	0.0226578	0	0
TMEM51-AS1	0.165837	0	1.35135	0.425532	0	0.875912	0	2.98507	0	2.44821	0.948992	0.215827	0.0977517	1.79856	0.621118	0	0	0.396825	1.5873	0.625	1.29633	0	0	0	0.793651	0.600601	1.02564	0.8	0	0	1.24827	0	0	0	0	0.419168	0	0
TMEM51	0.66335	0.914634	13.5135	5.95745	1.21951	7.39659	4.72674	8.95522	12.766	16.7608	9.37129	2.01439	2.54154	30.5755	3.72671	11.1111	22.2222	2.77778	9.87654	1.04167	33.879	25	0	0.724638	0.793651	10.6106	13.3333	4.8	0	26.3158	12.0666	12.5	0	4	4.41176	6.8653	16.9014	3.34728
C1orf195	0	0	0	0	0	0.0486618	0	0	0	0	0	0	0	0	0	0	0	0	0	0	0	0	0	0	0	0	0	0	0	0	0	0	0	0	0	0	0	0
AL035405.1	0	0	0	0	0	0	0	0	0	0	0	0	0	0.359712	0	0	0	0	0.176367	0	0.232674	0	0	0	0	0	0	0	0	0	0	0	0	0	0	0.0339866	0	0
AL391094.1	0	0	0	0	0	0.0486618	0	0	0	0	0	0	0	0.359712	0	0	0	0	0.176367	0	0.191125	0	0	0	0	0	0	0	0	0	0	0	0	0	0	0.0339866	0	0
FHAD1	0.497512	0.152439	1.35135	0.425532	0	1.11922	1.62482	0	0	2.07156	0.474496	0.431655	1.46628	2.8777	0	0	0	1.19048	82.1869	0	15.0407	6.25	0	1.44928	0.793651	1.3013	0.512821	0.8	0	5.26316	3.7448	12.5	0	0	0.980392	0.985612	2.8169	0.83682
AL031283.2	0	0	0	0	0	0	0	0	0	0	0	0	0	0	0	0	0	0	1.0582	0.416667	0.216055	0	0	0	0.793651	0	0	0.8	0	0	0.138696	0	0	0	0	0.0339866	0	0
AL031283.3	0	0	0	0	0	0	0	0	0	0	0	0	0	0	0	0	0	0	0.705467	0	0.0166196	0	0	0	0	0	0	0	0	0	0	0	0	0	0	0.0113289	0	0
AL031283.1	0	0	1.35135	0	0	0.194647	0	0	0	0.188324	0	0.143885	0	0	0.621118	0	0	0	3.7037	0	0.623234	0	0	0	2.38095	0.3003	0.512821	0	0	0	0.277393	0	0	0	0	0.124618	0	0
EFHD2	47.4295	23.1707	9.45946	8.93617	17.0732	40.438	30.8715	13.4328	68.0851	11.2994	10.7948	83.5252	20.4301	80.5755	24.2236	27.7778	22.2222	82.5397	64.1975	42.0833	93.5267	43.75	40	89.1304	87.3016	74.3744	20	26.4	47.0588	68.4211	49.2372	25	61.5385	32	17.6471	34.825	14.0845	28.8703
CTRC	0.165837	0	0	0	0	0.0973236	0	0	0	0.188324	0.118624	0.215827	0	0.359712	0	0	0	0	0.176367	0	0.623234	0	0	0	0	0.1001	0	0	0	0	0.138696	0	0	0	0	0.0453155	0	0.209205
CELA2A	0	0	0	0	0	0	0.14771	0	0	0	0	0	0	0.359712	0	0	0	0	0	0	0.38225	0	0	0	0	0	0	0	0	0	0.138696	0	0	0	0	0.0566444	0	0.209205
CELA2B	0	0.152439	0	0	0	0	0.443131	0	0	0	0	0	0	0	0	0	0	0	0	0	1.38773	0	0	0	0	0	0	0	0	0	0	0	0	0	0	0.0226578	0	0
CASP9	0.995025	1.52439	2.7027	3.40426	1.21951	6.18005	5.613	2.98507	12.766	1.88324	1.66074	4.10072	3.22581	14.0288	0.621118	0	0	3.1746	11.1111	3.75	15.2318	12.5	10	3.62319	3.1746	2.9029	3.07692	4	5.88235	0	7.76699	0	23.0769	16	2.94118	7.40909	2.8169	2.09205
DNAJC16	6.13599	6.85976	9.45946	4.68085	6.09756	17.7129	5.16987	2.98507	12.766	7.72128	9.60854	7.91367	14.7605	10.4317	11.1801	8.33333	0	8.73016	40.7407	10.625	14.8164	43.75	20	2.89855	5.55556	9.00901	9.23077	12	0	26.3158	23.8558	37.5	30.7692	0	15.6863	27.7897	9.85915	10.4603
SCARNA21B	0	0	0	0	0	0	0	0	0	0	0	0	0	0	0	0	0	0	0.176367	0	0	0	0	0	0	0	0	0	0	0	0	0	0	0	0	0.0226578	0	0
AL121992.3	0	0.152439	0	0	0	0	0	0	0	0	0	0	0	0	0.621118	0	0	0	0	0	0	0	0	0	0	0	0	0	0	0	0	0	7.69231	0	0	0.0226578	0	0
AGMAT	2.15589	3.35366	0	0	1.21951	0.827251	0.590842	0	0	0.376648	0.118624	0.0719424	0.293255	0.359712	0	0	0	0.396825	1.76367	0.416667	0.332392	0	0	0.724638	0.793651	0.1001	0.512821	4	0	0	1.10957	0	23.0769	0	0	1.18953	0	0.209205
AL121992.1	0	0	0	0.425532	0	1.41119	0	0	0	0	0.237248	0	0.195503	0	0	0	0	0	5.99647	0	0.307462	0	0	0	0	0.1001	0	0	0	0	0.416089	0	0	0	0.490196	0.521128	0	0.209205
CHCHD2P6	0	0	0	0	0	0.0486618	0	0	0	0	0	0	0.0977517	0	0	0	0	0	0.176367	0	0.0166196	0	0	0	0	0	0	0	0	0	0.277393	0	0	0	0.980392	0.328537	0	0
RNU7-179P	0	0	0	0	0	0	0	0	0	0	0	0	0	0	0	0	0	0	0	0	0	0	0	0	0	0	0	0	0	0	0	0	0	0	0	0	0	0
CD24P1	0	0	0	0	0	0	0	0	0	0	0	0	0	0	0	0	0	0	0	0	0	0	0	0	0	0	0	0	0	0	0	0	0	0	0	0.0113289	0	0
DDI2	8.62355	7.31707	12.1622	14.4681	9.7561	34.0633	8.56721	8.95522	25.5319	23.3522	15.4211	13.0216	32.2581	12.2302	11.1801	0	44.4444	15.873	43.3862	13.125	39.4299	31.25	20	1.44928	5.55556	16.8168	10.7692	11.2	29.4118	36.8421	43.5506	50	30.7692	20	16.6667	43.333	15.493	13.8075
RSC1A1	0	0	0	0	0	0	0	0	0	0	0	0	0	0	0	0	0	0	0	0	0	0	0	0	0	0	0	0	0	0	0	0	0	0	0	0	0	0
AL121992.2	0	0	0	0	0	0	0.14771	0	0	0	0	0.0719424	0	0.719424	0	0	0	0	0	0	0.349011	0	0	0	0.793651	0.2002	0	0	0	0	0	0	0	0	0	0.0679733	0	0
PLEKHM2	8.62355	5.79268	18.9189	10.2128	13.4146	16.0097	9.60118	14.9254	48.9362	11.4878	12.3369	16.9065	12.1212	21.223	12.4224	11.1111	11.1111	18.254	16.4021	17.0833	53.1328	43.75	10	5.7971	7.14286	30.3303	10.2564	11.2	11.7647	10.5263	19.2788	25	15.3846	24	25	37.2154	11.2676	17.5732
AL450998.3	0	0	0	0	0	0	0	0	0	0	0.118624	0	0.195503	0	0	0	0	0	0	0	0.0249294	0	0	0	0	0	0	0	0	0	0	0	0	0	0	0.0113289	0	0
SLC25A34	0	0.152439	1.35135	0.851064	0	0.681265	0.443131	1.49254	0	0.753296	0.355872	0.719424	0.879765	0.719424	0.621118	2.77778	0	0.793651	0.529101	0	2.50956	6.25	0	0	0	0.800801	1.02564	0	0	0	0.277393	0	0	0	0	0.543786	0	0.83682
SLC25A34-AS1	0	0	0	0	0	0.0973236	0	0	2.12766	0	0.118624	0	0	0	1.86335	0	0	0	0	0	0	0	0	0	0	0	0	0	0	0	0	0	0	0	0	0	0	0.209205
TMEM82	0	0	0	0	0	0	0	0	0	0	0	0	0	0	0	0	0	0	0	0	0.0249294	0	0	0	0	0	0	0	0	0	0.138696	0	0	0	0	0.0339866	0	0
FBLIM1	0.995025	0.609756	6.75676	17.4468	6.09756	13.6253	1.4771	25.3731	29.7872	1.50659	3.44009	0.791367	8.89541	2.15827	24.8447	13.8889	22.2222	0.396825	7.93651	4.16667	4.54545	25	30	1.44928	3.1746	1.7017	31.7949	0	0	21.0526	19.8336	37.5	38.4615	40	9.31373	4.44092	32.3944	8.78661
RPL12P14	0	0	0	0	0	0	0	0	0	0	0	0	0	0	0	0	0	0	0	0	0.0332392	0	0	0	0	0	0	0	0	0	0	0	0	0	0	0.0566444	0	0
UQCRHL	1.49254	1.06707	4.05405	2.12766	3.65854	5.15815	1.62482	2.98507	2.12766	0.188324	0.474496	2.15827	2.73705	1.79856	1.24224	2.77778	0	2.77778	3.7037	3.54167	4.69503	0	10	1.44928	1.5873	2.1021	1.53846	4	0	10.5263	7.4896	12.5	7.69231	0	4.90196	6.16291	0	2.71967
AL450998.1	0.165837	0.304878	0	0.425532	2.43902	0.53528	0.738552	0	0	0.188324	0	0.359712	0.684262	2.15827	0.621118	0	0	0.396825	0.352734	0.208333	0.839289	0	0	0	0	0.800801	0	0	0	0	0.832178	0	0	0	0	1.25751	0	0.209205
AL450998.2	5.97015	4.57317	2.7027	8.51064	7.31707	15.1338	5.31758	7.46269	6.38298	7.34463	7.23606	5.10791	7.03812	10.0719	8.07453	2.77778	22.2222	4.36508	10.9347	4.16667	7.13811	0	20	6.52174	8.73016	4.2042	7.69231	5.6	0	15.7895	11.0957	12.5	0	12	9.80392	14.0705	5.6338	4.81172
SPEN	18.2421	16.311	29.7297	21.2766	23.1707	40.146	21.8612	26.8657	53.1915	28.0603	31.1981	24.1727	33.0401	37.7698	36.0248	27.7778	22.2222	26.1905	47.9718	26.6667	42.1389	37.5	40	20.2899	26.9841	29.5295	23.5897	16.8	17.6471	15.7895	42.8571	50	53.8462	24	26.9608	53.6422	22.5352	32.4268
AL034555.1	0	0	0	0	0	0	0	0	0	0	0	0.0719424	0	0	0	0	0	0	0	0	0	0	0	0	0	0	0	0	0	0	0	0	0	0	0	0.0113289	0	0
ZBTB17	3.81426	3.96341	10.8108	7.23404	7.31707	7.83455	6.35155	2.98507	21.2766	3.9548	6.28707	4.67626	5.4741	10.4317	14.2857	8.33333	0	2.38095	9.87654	6.875	14.5671	18.75	20	2.89855	5.55556	4.6046	7.17949	4.8	0	15.7895	10.1248	0	15.3846	4	9.80392	14.0705	8.4507	7.53138
AL355994.4	0.829187	0.762195	0	0.851064	0	0.632603	0.443131	0	0	0.564972	0.948992	0	0.488759	0.719424	1.86335	0	0	0	0.529101	0.208333	0.365631	0	0	0	1.5873	0.1001	0	0.8	0	0	0.138696	0	0	4	0.980392	0.475813	0	0.41841
AL355994.1	0	0	0	0	0	0	0	0	0	0	0	0	0	0	0	0	0	0	0	0	0	0	0	0	0	0	0	0	0	0	0	0	0	0	0	0	0	0
AL355994.5	0	0	0	0	0	0	0	0	0	0	0	0	0	0	0	0	0	0	0	0	0	0	0	0	0	0	0	0	0	0	0	0	0	0	0	0	0	0
TBC1D3P6	0	0	0	0	0	0	0	0	0	0	0	0	0	0	0	0	0	0	0	0	0	0	0	0	0	0	0	0	0	0	0	0	0	0	0	0	0	0
SRARP	0	0	0	0	0	0	0	0	0	0.94162	0.59312	0	0	0	1.24224	0	0	0.396825	0.176367	0	0	0	0	0	0	0.1001	0	0	0	47.3684	1.24827	0	0	0	0	0.0566444	0	0.209205
AL355994.3	0	0	0	0	0	0	0	0	0	0	0	0	0	0	0	0	0	0	0	0	0	0	0	0	0	0	0	0	0	0	0	0	0	0	0	0	0	0
HSPB7	0	0	1.35135	7.65957	0	0.0973236	0	31.3433	0	0	0	0	0.0977517	0	0	0	0	0	0.352734	0	0.0332392	43.75	0	0	0	0	0.512821	0	0	5.26316	0.416089	0	0	16	1.47059	0.317209	12.6761	0
CLCNKA	0	0	0	0	0	0.194647	0	0	0	0	0	0	0.293255	0	0	0	0	0	2.82187	0	0.0415489	0	0	0	0	0	0	0	0	57.8947	0.416089	0	0	0	0	0.181262	0	0
AL355994.2	0	0	0	0	0	0	0	0	0	0	0	0	0	0	0	0	0	0	0	0	0	0	0	0	0	0	0	0	0	0	0	0	0	0	0	0	0	0
CLCNKB	0	0	0	0	1.21951	0.194647	0.14771	0	0	0	0	0	0.879765	0	0	0	0	0	1.0582	0	0.0415489	0	0	0	0	0	0	0	0	94.7368	1.10957	0	0	0	2.45098	0.30588	0	0
FAM131C	0	0	0	0.425532	0	0.291971	0	0	2.12766	0	0.118624	0	0.0977517	0	0	0	0	0	0.705467	0	0.0332392	0	0	0	0	0	0	0.8	0	78.9474	2.49653	0	0	0	0.490196	0.113289	0	0.209205
EPHA2	1.49254	1.06707	4.05405	4.25532	0	37.0316	0.14771	1.49254	25.5319	6.59134	7.71056	1.07914	35.4839	4.67626	11.8012	13.8889	11.1111	1.19048	36.5079	18.5417	1.9528	43.75	0	2.17391	0.793651	1.1011	4.61538	4	23.5294	0	54.5076	75	15.3846	8	25.4902	53.461	5.6338	17.9916
AL451042.2	0	0	0	0	0	0.340633	0	0	0	0.188324	0	0	0.195503	0	0	0	0	0	0.881834	0	0	0	0	0	0	0	0	0	0	0	1.66436	0	7.69231	0	0.490196	1.47275	0	0
AL451042.1	0	0	0	0.425532	0	0.924574	0	0	0	0.188324	0	0	0.58651	0	0	0	0	0	1.23457	0	0.0249294	0	0	0	0	0	0	0	0	0	1.52566	0	0	0	0	2.09584	0	0
ARHGEF19-AS1	0	0	0	0	0	0	0	0	0	0	0	0	0	0	0	0	0	0	0	0	0	0	0	0	0	0	0	0	0	0	0.138696	0	0	0	0	0.0113289	0	0
ARHGEF19	3.48259	1.52439	1.35135	2.97872	1.21951	18.3455	1.92024	1.49254	12.766	1.12994	2.37248	1.51079	8.11339	2.51799	3.10559	2.77778	22.2222	2.38095	6.87831	4.58333	1.89463	12.5	0	0	3.1746	1.7017	1.02564	4.8	0	15.7895	16.5049	12.5	23.0769	8	4.90196	14.7842	1.40845	3.76569
ANO7L1	0	0	0	0	0	0.0973236	0	0	0	0	0.355872	0.143885	0.195503	0	0	0	0	0	1.41093	0	0.216055	0	0	0	0	0	0	0.8	0	0	0.693481	0	7.69231	0	0	0.543786	0	0.209205
CPLANE2	0.66335	0.762195	0	0	1.21951	1.45985	1.92024	1.49254	0	0.564972	0.355872	0.28777	0.879765	1.43885	0.621118	0	0	0	11.4638	1.04167	1.09689	0	10	0	0.793651	0.2002	1.53846	0	0	0	3.6061	12.5	0	0	0.980392	4.73547	1.40845	0.41841
MT1XP1	0.66335	0.457317	0	2.55319	1.21951	1.55718	0.14771	0	0	0	1.42349	0.863309	1.27077	1.79856	0.621118	0	0	0	0.881834	0.833333	1.51238	0	0	0	0	0.600601	0	0	0	5.26316	1.24827	0	0	0	0.980392	1.62003	0	1.67364
FBXO42	7.29685	7.0122	9.45946	14.8936	7.31707	18.5401	7.38552	10.4478	6.38298	7.72128	7.59193	11.0791	14.0762	19.4245	8.07453	0	33.3333	8.73016	18.1658	5.625	26.9154	31.25	30	2.17391	9.52381	12.9129	11.7949	13.6	11.7647	21.0526	22.4688	12.5	30.7692	4	14.7059	22.0233	9.85915	9.83264
SZRD1	21.0614	12.6524	28.3784	16.1702	10.9756	30.4623	16.3959	22.3881	57.4468	15.0659	16.6074	20.7914	25.5132	35.6115	20.4969	30.5556	33.3333	23.4127	33.3333	26.4583	48.8449	68.75	50	14.4928	15.0794	26.4264	17.9487	14.4	23.5294	47.3684	40.9154	62.5	53.8462	40	30.8824	55.806	19.7183	26.3598
RPL22P3	0.165837	0	0	0	0	0	0	0	0	0	0	0	0	0	0	0	0	0	0	0.208333	0.0415489	0	0	0	0	0.1001	0	0	0	0	0	0	0	0	0	0.090631	0	0
SPATA21	0.331675	0.304878	1.35135	0	0	0.243309	0	0	2.12766	0.188324	0	0.28777	0.0977517	0.719424	0	0	0	0	0.529101	0.416667	0.207745	0	0	0	0	0.2002	0	0	0	0	0.554785	0	0	0	0	0.283222	2.8169	0
NECAP2	19.2371	21.4939	21.6216	11.4894	18.2927	18.4915	19.0547	10.4478	65.9574	24.2938	17.2005	22.2302	13.8807	40.6475	24.2236	16.6667	11.1111	24.2063	34.3915	19.1667	69.528	50	40	6.52174	19.8413	31.3313	11.7949	18.4	29.4118	10.5263	24.2718	12.5	30.7692	4	20.098	27.11	12.6761	27.6151
LINC01772	1.65837	1.06707	0	0	1.21951	1.89781	1.03397	0	0	1.12994	2.25386	1.07914	1.75953	1.07914	2.48447	0	0	1.19048	2.46914	1.04167	6.82234	0	10	0	0	1.7017	1.02564	0.8	0	0	1.94175	0	7.69231	0	0.980392	0.951626	1.40845	0.627615
CROCCP3	1.3267	0.914634	2.7027	2.97872	0	2.57908	1.77253	0	2.12766	1.88324	1.42349	0.57554	2.73705	1.07914	2.48447	2.77778	11.1111	1.5873	12.522	1.45833	1.64534	0	0	0	3.1746	0.800801	3.07692	0	5.88235	5.26316	2.63523	0	0	0	2.94118	1.54073	4.22535	2.92887
RNU1-1	0	0	0	0	0	0	0	0	0	0	0	0	0	0	0	0	0	0	0	0	0	0	0	0	0	0	0	0	0	0	0	0	0	0	0	0	0	0
AL137802.2	0	0	0	0	0	0.389294	0.14771	0	0	0	0	0.0719424	0.0977517	0.359712	0	0	0	0	0.352734	0.208333	0.0415489	0	0	0	1.5873	0.3003	0.512821	0.8	0	0	0.277393	0	0	0	0.490196	0.215249	0	0
AL137802.3	0	0	0	0	0	0	0	0	0	0	0	0	0	0	0	0	0	0	0	0	0	0	0	0	0	0	0	0	0	0	0	0	0	0	0	0.0113289	0	0
AL137802.1	0	0	0	0	0	0	0	0	0	0	0	0	0	0	0	0	0	0	0	0	0	0	0	0	0	0	0	0	0	0	0	0	0	0	0	0	0	0
LINC01783	0	0	0	0	0	0	0	0	0	0	0	0.0719424	0.0977517	0	0	0	0	0	2.6455	0	0	0	0	0	0	0	0	0	0	0	0	0	0	0	0	0.0226578	0	0
RNU1-6P	0	0	0	0	0	0	0	0	0	0	0	0	0	0	0	0	0	0	0.176367	0	0	0	0	0	0	0	0	0	0	0	0	0	0	0	0	0	0	0
AL355149.1	0	0	0	0	0	0	0	0	0	0	0	0	0	0	0	0	0	0	0	0	0	0	0	0	0	0	0	0	0	0	0	0	0	0	0	0	0	0
NBPF1	4.31177	4.11585	16.2162	14.8936	7.31707	34.6472	13.1462	8.95522	29.7872	6.40301	7.11744	7.69784	20.7234	7.19424	8.69565	11.1111	33.3333	8.33333	37.3898	14.7917	37.9924	25	50	1.44928	9.52381	15.1151	8.71795	13.6	0	10.5263	29.1262	12.5	23.0769	0	17.6471	19.8935	8.4507	8.99582
AL137798.1	0	0	0	0	0	0.0486618	0	0	0	0	0	0	0	0	0	0	0	0	0.176367	0	0.0249294	0	0	0	0	0	0	0	0	0	0	0	0	0	0	0.0113289	0	0
CROCCP2	12.272	8.9939	10.8108	11.0638	4.87805	21.4112	10.4874	10.4478	4.25532	12.806	10.9134	8.70504	13.783	7.19424	9.31677	13.8889	11.1111	10.7143	49.2063	15	11.8747	12.5	20	0.724638	11.9048	13.013	16.4103	16	5.88235	21.0526	18.5853	12.5	15.3846	0	15.6863	20.4939	11.2676	12.9707
AL137798.3	0	0	0	0	0	0	0	0	0	0	0	0	0	0	0	0	0	0	0	0	0	0	0	0	0	0	0	0	0	0	0	0	0	0	0	0	0	0
MST1P2	0.331675	0.304878	0	0.425532	0	2.09246	0.886263	0	2.12766	0.188324	0.59312	0.215827	2.44379	0.719424	0	0	0	0.396825	3.88007	0	0.274223	6.25	0	0	0	0.1001	0	0	0	0	1.80305	0	0	0	2.94118	7.94154	1.40845	0
AL137798.2	0	0	0	0	0	0	0	0	0	0	0	0	0	0	0	0	0	0	0	0	0	0	0	0	0	0	0	0	0	0	0	0	0	0	0	0	0	0
RNU1-3	0	0	0	0	0	0	0	0	0	0	0	0	0	0	0	0	0	0	0	0	0	0	0	0	0	0	0	0	0	0	0	0	0	0	0	0	0	0
AL021920.2	0	0	0	0	0	0.0486618	0	0	0	0	0	0	0.0977517	0	0	0	0	0	0	0	0	0	0	0	0	0	0	0	0	0	0	0	0	0	0	0.0339866	0	0
EIF1AXP1	0.66335	0.457317	0	0	0	1.36253	1.03397	1.49254	0	0.564972	0.355872	0.57554	1.17302	1.43885	1.24224	2.77778	0	0	1.76367	0.625	1.55393	0	0	0	0	0.4004	1.53846	3.2	5.88235	5.26316	1.94175	0	7.69231	4	0.980392	2.17514	0	0.83682
ESPNP	0	0	0	0	0	0.0486618	0	0	0	0	0	0	0	0	0	0	0	0	0	0	0	0	0	0	0	0	0	0	0	0	0.138696	0	0	0	0	0.090631	0	0
AL021920.1	0.165837	0	0	0	0	0	0	0	0	0	0	0	0	0	0	0	0	0	0	0	0	0	0	0	0	0	0	0	0	0	0	0	0	0	0	0.0113289	0	0
AL021920.3	0	0	0	0	0	0	0	0	0	0	0	0	0	0	0	0	0	0	0	0	0	0	0	0	0	0	0	0	0	0	0	0	0	0	0	0.0113289	0	0
CROCC	3.31675	4.72561	6.75676	7.23404	6.09756	7.54258	5.31758	7.46269	4.25532	2.63653	1.89798	1.43885	6.84262	2.15827	3.72671	11.1111	0	0.793651	50.0882	5.625	3.24913	12.5	0	0.724638	6.34921	1.7017	3.07692	0.8	0	5.26316	5.82524	0	15.3846	4	9.31373	6.8653	5.6338	1.88285
CROCCP4	0	0	0	0	0	0	0	0	0	0	0	0	0	0	0	0	0	0	0	0	0	0	0	0	0	0	0	0	0	0	0	0	0	0	0	0.0339866	0	0
RNU1-4	0	0	0	0	0	0	0	0	0	0	0	0	0	0	0	0	0	0	0	0	0	0	0	0	0	0	0	0	0	0	0	0	0	0	0	0	0	0
MST1L	0.331675	0.457317	0	0	0	2.43309	1.03397	2.98507	2.12766	0.376648	1.18624	0.215827	3.81232	0.359712	0	0	0	0	2.99824	0.833333	0.224364	6.25	0	0	0	0.2002	0	0.8	0	0	1.66436	0	0	0	3.92157	9.75416	0	0.83682
BX284668.1	0	0	0	0	0	0	0	0	0	0	0	0	0	0	0	0	0	0	0	0	0	0	0	0	0	0	0	0	0	0	0	0	0	0	0	0	0	0
BX284668.3	0	0	0	0	0	0	0	0	0	0	0	0	0	0	0	0	0	0	0	0	0	0	0	0	0	0	0	0	0	0	0	0	0	0	0	0	0	0
MIR3675	0	0	0	0	0	0	0	0	0	0	0	0	0	0	0	0	0	0	0	0	0	0	0	0	0	0	0	0	0	0	0	0	0	0	0	0	0	0
BX284668.2	0.165837	0	0	0	0	0	0.14771	0	0	0	0	0	0	0	0	0	0	0	0.176367	0	0.00830979	0	0	0	0	0	0	0	0	0	0	0	0	0	0	0.20392	0	0.209205
RNU1-5P	0	0	0	0	0	0	0	0	0	0	0	0	0	0	0	0	0	0	0	0	0	0	0	0	0	0	0	0	0	0	0	0	0	0	0	0	0	0
BX284668.5	1.65837	2.28659	2.7027	2.97872	3.65854	11.8248	6.94239	4.47761	17.0213	6.59134	5.33808	7.48201	8.89541	9.35252	5.59006	5.55556	0	9.92063	15.6966	10.2083	15.2318	12.5	10	1.44928	1.5873	8.40841	2.5641	3.2	0	0	11.5118	12.5	0	8	11.2745	31.4263	1.40845	7.94979
BX284668.4	0	0	0	0	0	0.0486618	0	0	0	0	0	0	0	0	0	0	0	0	0	0	0.0249294	0	0	0	0	0	0	0	0	0	0	0	0	0	0	0.0339866	0	0
RNU1-2	0	0	0	0	0	0	0	0	0	0	0	0	0	0	0	0	0	0	0	0	0	0	0	0	0	0	0	0	0	0	0	0	0	0	0	0	0	0
BX284668.6	1.82421	1.82927	1.35135	0	0	2.72506	0.295421	0	2.12766	0.376648	0.237248	0.0719424	0.782014	0	0	2.77778	0	0.396825	1.23457	0.833333	0.365631	0	0	0	1.5873	0.4004	1.53846	1.6	0	0	1.94175	12.5	0	0	0.980392	1.18953	0	0.209205
MFAP2	0	0	21.6216	18.2979	0	7.93187	0.295421	0	0	0.376648	0.474496	0	1.95503	0.359712	0	11.1111	11.1111	0	1.0582	0.208333	0.0830979	0	10	0	0.793651	0	1.02564	0	0	5.26316	3.8835	0	0	4	0.980392	0.169933	1.40845	0.627615
AL049569.1	0	0	0	0	0	0	0	0	0	0	0	0	0	0	0	0	0	0	0	0	0	0	0	0	0	0	0	0	0	0	0	0	0	0	0	0	0	0
ATP13A2	5.80431	5.4878	6.75676	2.12766	0	10.9976	3.54505	4.47761	40.4255	5.46139	5.4567	7.91367	7.23363	1.79856	8.07453	2.77778	11.1111	7.53968	15.5203	6.875	13.869	18.75	20	1.44928	6.34921	10.8108	5.64103	5.6	52.9412	26.3158	22.8849	37.5	23.0769	8	18.1373	28.1296	1.40845	6.48536
SDHB	17.9104	15.8537	35.1351	22.9787	18.2927	41.1192	27.7696	40.2985	53.1915	24.1055	17.9122	32.3022	26.5885	38.8489	21.7391	33.3333	33.3333	32.1429	48.6772	26.25	69.5446	75	50	7.97101	12.6984	35.1351	24.1026	31.2	29.4118	52.6316	53.6755	87.5	53.8462	40	40.1961	68.6643	30.9859	27.1967
PADI2	0	0.304878	0	0.425532	0	0.194647	15.6573	0	0	0.188324	0.118624	1.94245	0.0977517	18.705	0	0	0	0.396825	0.529101	0.416667	7.34585	0	0	15.2174	0	1.001	0	0	0	0	3.32871	0	53.8462	0	0.490196	0.396511	5.6338	0
AL590644.1	0	0	0	0	0	0.145985	0	0	0	0	0	0	0	0	0	0	0	0	0	0	0.00830979	0	0	0	0	0	0	0	0	0	0.277393	0	0	0	0	0	0	0
AL590644.3	0	0	0	0	0	0	0	0	0	0	0	0	0	0	0	0	0	0	0	0	0	0	0	0	0	0	0	0	0	0	0.138696	0	0	0	0	0	0	0
PADI1	0	0	0	0	0	0.0973236	0	0	0	0	0	0	0	0	0	0	0	0	0	0	0.0997175	0	0	0	0	0	0	0	0	0	1.38696	0	0	0	0	0.0226578	0	0
PADI3	0	0	0	0	0	2.2871	0	0	0	0	0	0	0	0	0	0	0	0	0.176367	0	0	0	0	0	0	0.1001	0	0	0	0	1.24827	0	0	0	0	0.0453155	0	0
MIR3972	0	0	0	0	0	0	0	0	0	0	0	0	0	0	0	0	0	0	0	0	0	0	0	0	0	0	0	0	0	0	0	0	0	0	0	0	0	0
PADI4	0.165837	0.762195	0	0.425532	0	0.194647	6.05613	0	2.12766	0	0	8.63309	0	0.719424	0	0	0	0	0.176367	0	0.457038	0	0	17.3913	4.7619	0.4004	0	0.8	11.7647	0	0.554785	0	0	0	0	0.169933	0	0.209205
PADI6	0.165837	0	0	0	0	0	0	0	0	0	0	0.431655	0	0	0	0	0	0.396825	0	0	0.0415489	0	0	0	0.793651	0.3003	0	0.8	0	0	0	0	0	0	0	0	0	0.41841
RCC2-AS1	0	0	0	0	0	0	0	0	0	0	0	0	0	0	0	0	0	0	0	0.208333	0.0249294	0	0	0	0	0	0	0	0	0	0	0	0	0	0	0.0226578	0	0
RCC2	16.5837	9.45122	8.10811	7.65957	12.1951	37.1776	17.2821	7.46269	38.2979	6.77966	10.4389	19.4964	27.8592	39.9281	12.4224	11.1111	11.1111	27.381	20.6349	11.4583	47.1414	43.75	30	0	23.0159	24.9249	6.15385	14.4	23.5294	26.3158	43.828	62.5	38.4615	16	22.549	32.0834	7.04225	12.9707
ARHGEF10L	1.16086	1.06707	13.5135	5.10638	0	5.83942	5.46529	8.95522	0	0.753296	0.59312	5.82734	5.18084	6.83453	0.621118	0	11.1111	8.73016	5.64374	0.416667	39.3884	6.25	20	0	0	11.1111	4.10256	2.4	0	0	17.4757	62.5	46.1538	8	5.39216	9.21038	16.9014	1.67364
AL136529.1	0	0	0	0	0	0	0	0	0	0	0	0	0	0	0	0	0	0	0	0	0	0	0	0	0	0	0	0	0	0	0	0	0	0	0	0	0	0
ACTL8	0	0	0	0	0	0	0	0	0	0	0	0	0	0	0	0	0	0	0	0	0	0	0	0	0	0	0	0	0	0	0	0	0	0	0	0	0	0
AL357509.1	0	0	0	0	0	0	0	0	0	0	0	0	0	0	0	0	0	0	0	0	0	0	0	0	0	0	0	0	0	0	0	0	0	0	0	0	0	0
LINC01654	0	0	0	0	0	0	0	0	0	0	0	0	0	0	0	0	0	0	0	0	0	0	0	0	0	0	0	0	0	0	0	0	0	0	0	0	0	0
IGSF21	0.331675	0.152439	0	0	1.21951	0.0973236	0	0	0	0	0.237248	0.143885	0	1.79856	0	0	0	0	0	0.416667	0.565066	0	0	0	0.793651	9.10911	0.512821	0.8	0	0	0.554785	0	0	0	0	0.181262	0	1.25523
AL365209.1	0.165837	0	0	0	0	0	0	0	0	0	0	0	0.0977517	1.07914	0	0	0	0.396825	0	0	0.116337	0	0	0	0	4.3043	0	0	0	0	0	0	0	0	0	0.0793021	0	0.209205
IGSF21-AS1	0	0	0	0	0	0	0	0	0	0	0	0	0	0	0	0	0	0	0	0	0	0	0	0	0	0	0	0	0	0	0	0	0	0	0	0	0	0
AL591896.1	0	0	0	0	0	0	0	0	0	0	0	0	0	0	0	0	0	0	0	0	0	0	0	0	0	0	0	0	0	0	0	0	0	0	0	0	0	0
KLHDC7A	0	0	0	0	0	2.14112	0	0	0	0	0	0.0719424	1.66178	0	0	0	0	0	9.52381	0	0.0332392	0	0	0	0	0	0	0	0	0	7.4896	0	0	0	5.39216	4.96205	0	0
DYNLL1P3	0	0	0	0	0	0	0	0	0	0	0	0	0	0	0	0	0	0	0	0	0	0	0	0	0	0	0	0	0	0	0	0	0	0	0	0	0	0
AL031737.1	0	0	0	0	0	0	0	0	0	0	0	0	0	0	0	0	0	0	0	0	0	0	0	0	0	0	0	0	0	0	0	0	0	0	0	0	0	0
PAX7	0	0	0	0	0	1.0219	0	0	0	0	0	0	0.391007	0	0	0	0	0	0	0	0	0	0	0	0	0	0	0	0	0	0.693481	0	0	0	0	0.0339866	0	0
TAS1R2	0	0	0	0	0	0	0	0	0	0	0	0	0	0	0	0	0	0	0	0	0	0	0	0	0	0	0	0	0	0	0	0	0	0	0	0	0	0
AL080251.1	0	0	0	0	0	0	0	0	0	0	0	0	0	0	0	0	0	0	0	0	0	0	0	0	0	0	0	0	0	0	0	0	0	0	0	0	0	0
ALDH4A1	0.165837	0.304878	2.7027	2.55319	0	4.91484	0.738552	8.95522	4.25532	1.50659	0.59312	1.65468	2.93255	3.95683	1.24224	5.55556	11.1111	1.19048	1.0582	1.45833	2.94998	6.25	10	0	0	0.800801	0.512821	0	11.7647	0	5.27046	0	0	0	7.84314	11.8387	2.8169	1.25523
MIR4695	0	0	0	0	0	0	0	0	0	0	0	0	0	0	0	0	0	0	0	0	0	0	0	0	0	0	0	0	0	0	0	0	0	0	0	0	0	0
MIR1290	0	0	0	0	0	0	0	0	0	0	0	0	0	0	0	0	0	0	0	0	0	0	0	0	0	0	0	0	0	0	0	0	0	0	0	0	0	0
IFFO2	4.14594	4.26829	5.40541	2.55319	4.87805	9.00243	2.65879	4.47761	14.8936	2.25989	2.4911	2.23022	4.78983	2.15827	3.10559	0	0	0.793651	23.2804	0.833333	1.92787	6.25	0	0	6.34921	1.2012	3.58974	4.8	0	0	14.8405	50	15.3846	20	3.43137	24.8895	1.40845	2.51046
AL137127.1	0.497512	0.152439	1.35135	0	0	0.291971	0	0	0	0.753296	0.237248	0.28777	0	0	0	2.77778	0	0.396825	0.529101	0.208333	0.432109	0	0	0	0	0.2002	0.512821	0	0	0	0.416089	0	0	0	0	1.0196	1.40845	0.209205
UBR4	9.61857	6.55488	5.40541	10.6383	8.53659	14.0146	11.9645	10.4478	36.1702	10.5461	11.032	12.8777	10.7527	13.3094	11.1801	11.1111	33.3333	10.3175	22.3986	6.66667	19.636	31.25	50	12.3188	7.14286	11.7117	28.2051	11.2	0	21.0526	18.4466	25	38.4615	16	16.6667	30.6333	15.493	9.62343
EMC1-AS1	0.497512	0.457317	1.35135	1.2766	2.43902	1.36253	1.62482	1.49254	2.12766	1.12994	0.830368	0.791367	1.07527	0.359712	1.24224	0	0	0.396825	2.6455	2.29167	1.72844	6.25	20	1.44928	0.793651	0.700701	0.512821	4.8	0	0	2.49653	0	0	0	3.92157	2.43571	0	1.46444
EMC1	5.14096	4.57317	22.973	8.93617	6.09756	17.3723	5.31758	13.4328	29.7872	7.53296	4.86358	7.05036	11.437	10.0719	6.8323	13.8889	11.1111	9.52381	13.4039	10.4167	23.6497	25	10	0	8.73016	8.70871	8.71795	8	17.6471	42.1053	20.3883	25	23.0769	20	17.6471	30.3954	11.2676	11.9247
MRTO4	9.78441	7.77439	18.9189	13.617	12.1951	30.365	10.4874	16.4179	68.0851	6.02637	6.52432	8.77698	17.8886	21.223	11.8012	8.33333	11.1111	11.1111	28.0423	26.25	38.4078	62.5	40	1.44928	9.52381	13.9139	9.23077	21.6	35.2941	10.5263	33.4258	25	23.0769	48	20.098	47.6379	9.85915	16.1088
AL035413.2	0	0	0	0	0	0	0	0	0	0	0	0	0	0	0	0	0	0	0	0	0.00830979	0	0	0	0	0	0	0	0	0	0	0	0	0	0	0	0	0
AKR7L	0	0.152439	1.35135	0.425532	0	1.21655	0	0	0	0.376648	0.237248	0.215827	0.977517	0	0	0	0	0	2.29277	1.45833	0.299152	0	0	0	0	0.700701	0	0	0	0	1.66436	0	7.69231	0	0	0.736377	0	0.41841
AKR7A3	0.165837	0.304878	0	0.851064	0	0.53528	0.14771	1.49254	0	0	0.237248	0.215827	1.07527	0	0.621118	0	0	0	2.1164	0.625	0.324082	0	0	0	0	0.2002	0.512821	0.8	0	0	0.416089	0	0	0	0	0.475813	0	0.209205
AL035413.1	0	0.152439	0	0.425532	0	0.243309	0	0	0	0.188324	0	0	0.195503	0	0	0	0	0	0.352734	0	0.0166196	0	10	0	0	0.1001	0	0	0	0	0	0	0	0	0	0.158604	0	0
AKR7A2	13.4328	10.6707	40.5405	27.6596	14.6341	27.2993	21.5657	20.8955	36.1702	8.6629	10.9134	15.1079	19.5503	41.0072	16.1491	33.3333	22.2222	15.873	65.0794	17.0833	54.4208	62.5	30	2.17391	15.873	14.9149	10.2564	22.4	76.4706	36.8421	44.9376	25	23.0769	32	50.4902	54.8884	25.3521	15.4812
RNU6-1099P	0.165837	0.152439	0	1.2766	0	0.389294	0	0	2.12766	0	0.237248	0	0.195503	0	0	2.77778	0	0	0.529101	0	0.116337	0	0	0	0	0.1001	0	0	0	0	0.277393	0	0	0	0	0.124618	0	0
PQLC2	1.65837	1.82927	4.05405	2.97872	3.65854	5.10949	2.21566	2.98507	21.2766	1.88324	2.01661	3.81295	3.32356	7.19424	1.86335	2.77778	0	3.57143	9.17108	2.5	16.7692	31.25	10	1.44928	2.38095	4.9049	2.05128	4	5.88235	5.26316	7.4896	25	0	4	10.2941	21.5702	1.40845	3.34728
CAPZB	57.8773	54.1159	75.6757	57.4468	47.561	62.3844	53.3235	59.7015	89.3617	45.951	42.9419	76.3309	44.7703	84.8921	49.0683	41.6667	66.6667	76.5873	68.4303	61.875	87.3774	81.25	40	59.4203	59.5238	77.8779	62.5641	38.4	64.7059	73.6842	68.932	50	84.6154	64	69.1176	80.3104	54.9296	56.2762
RN7SL277P	0	0	0	0	0	0	0	0	0	0	0	0	0	0.359712	0	0	0	0	0	0	0.00830979	0	0	0	0	0	0	0	0	0	0	0	0	0	0	0	0	0
MICOS10	34.3284	30.9451	52.7027	37.8723	32.9268	64.5255	48.0059	41.791	78.7234	24.8588	20.4033	51.4388	46.8231	68.705	29.8137	38.8889	33.3333	49.2063	76.1905	42.7083	83.9704	81.25	50	13.0435	34.9206	50.3504	31.2821	36	29.4118	57.8947	68.2386	75	84.6154	76	56.3725	81.9531	50.7042	39.3305
RNU4-28P	0	0	0	0	0	0	0	0	0	0	0	0	0	0	0	0	0	0	0	0	0	0	0	0	0	0	0	0	0	0	0	0	0	0	0	0	0	0
AL031727.2	0	0	0	0	0	0	0	0	0	0	0	0	0	0	0	0	0	0	0	0	0.00830979	0	0	0	0	0	0	0	0	0	0	0	0	0	0	0	0	0
NBL1	8.12604	8.07927	72.973	80.8511	1.21951	36.3504	3.98818	34.3284	70.2128	1.50659	4.62633	1.07914	2.24829	0.359712	6.21118	27.7778	77.7778	0.793651	30.5115	35.625	0.839289	75	80	0	0.793651	1.4014	36.9231	1.6	0	21.0526	24.8266	0	0	36	7.35294	2.80956	42.2535	16.9456
MICOS10-NBL1	0	0	0	0	0	0	0	0	0	0	0	0	0	0	0	0	0	0	0	0	0	0	0	0	0	0	0	0	0	0	0	0	0	0	0	0	0	0
AL031727.1	2.81924	4.42073	8.10811	7.23404	2.43902	9.05109	3.84047	2.98507	10.6383	1.31827	1.42349	3.95683	5.6696	6.11511	4.34783	2.77778	0	3.1746	6.17284	4.58333	9.49809	18.75	10	0.724638	0.793651	4.8048	4.10256	7.2	0	5.26316	8.73786	0	15.3846	4	5.88235	9.30101	2.8169	3.13808
HTR6	0	0	0	0	0	0	0	0	0	0	0	0	0	0	0	0	0	0	0	0	0.00830979	0	0	0	0	0.1001	0	0	0	0	0	0	0	0	0	0.0226578	0	0
TMCO4	4.80929	4.72561	4.05405	5.10638	6.09756	14.7932	5.02216	4.47761	8.51064	1.88324	0.830368	2.15827	9.09091	9.35252	4.96894	0	11.1111	3.1746	18.6949	4.375	13.6447	12.5	20	1.44928	2.38095	4.4044	2.5641	8.8	0	31.5789	21.2205	12.5	38.4615	4	15.6863	21.3889	4.22535	3.13808
RNF186	0	0	0	0	0	0	0	0	0	0	0	0	0	0	0	0	0	0	0	0	0	0	0	0	0	0	0	0	0	5.26316	0.138696	0	0	0	0.490196	0	0	0
AL391883.1	0	0	0	0	0	0	0	0	0	0	0	0	0	0	0	0	0	0	0	0	0	0	0	0	0	0	0	0	0	0	0	0	0	0	0	0	0	0
OTUD3	3.64842	3.35366	6.75676	4.25532	2.43902	6.95864	1.92024	0	8.51064	2.44821	3.32147	1.43885	4.00782	2.15827	3.10559	2.77778	22.2222	1.98413	8.28924	3.54167	3.91391	12.5	0	0.724638	6.34921	2.6026	4.10256	4	0	21.0526	9.01526	25	7.69231	4	19.1176	19.7915	2.8169	3.34728
PLA2G2E	0	0	0	0	0	0	0	0	0	0	0	0	0	0	0	0	0	0	0	0	0	0	0	0	0	0	0	0	0	0	0	0	0	0	0	0	0	0
RN7SL304P	0	0	0	0	0	0	0	0	0	0	0	0	0	0	0	0	0	0	0	0	0	0	0	0	0	0	0	0	0	0	0	0	0	0	0	0	0	0
PLA2G2A	0	0	64.8649	21.7021	0	0.194647	0.14771	0	0	0	0.118624	0	0	0	0	0	11.1111	0	0.352734	0	0.207745	100	20	0	0	0.1001	0	0	0	0	0.277393	0	0	0	0	0.577773	0	0
PLA2G5	0	0	27.027	11.4894	0	0.0486618	0	0	0	0	0.118624	0	0	0	3.10559	0	11.1111	0	0	0	0.0249294	0	0	0	0	0	0	0	0	0	0	0	0	0	0	0.0226578	1.40845	0.83682
PLA2G2D	0	0	0	0	0	0.0486618	0	0	0	0	0	0.0719424	0	0	0	0	0	0	0	0.208333	0.731261	0	0	0	0	0.1001	0	5.6	0	0	0	0	0	0	0	0.090631	0	0
PLA2G2F	0	0	0	0	0	0	0	0	0	0	0	0	0	0	0	0	0	0	0	0	0	0	0	0	0	0	0	0	0	0	0	0	0	0	0	0	0	0
Z98257.1	0	0	0	0	0	0	0	0	0	0	0	0	0	0	0	0	0	0	0	0	0.224364	0	0	0	0	0	0	0	0	0	0.138696	0	0	0	0	0.0453155	0	0
PLA2G2C	0.165837	0	0	0	0	0	0.443131	0	0	0	0	0.143885	0.0977517	0	0	0	0	0.793651	0.352734	0	0.191125	0	0	0	0	0	0	0	0	0	0	0	0	0	0	0.0566444	0	0
UBXN10-AS1	1.65837	1.06707	0	1.2766	0	0.243309	7.38552	0	0	0	0.237248	0.143885	0.391007	0	0	0	0	0.396825	3.7037	0.208333	1.50407	0	0	0	0.793651	0.3003	0.512821	0	0	0	0.693481	0	0	0	1.47059	2.4697	0	0
UBXN10	0.829187	0.457317	2.7027	0.425532	0	0.389294	6.05613	1.49254	0	0.753296	1.18624	0.431655	0.293255	0	1.24224	2.77778	0	0	80.2469	1.25	5.00249	6.25	0	0.724638	0.793651	0.2002	0	0.8	0	0	4.71567	0	0	0	1.47059	3.78385	0	0.83682
LINC01757	0	0	0	0	0	0	0	0	0	0	0	0	0	0	0	0	0	0	0	0	0	0	0	0	0	0	0	0	0	0	0	0	0	0	0	0	0	0
Z98257.2	0	0	0	0	0	0	0	0	0	0	0	0	0	0	0	0	0	0	0	0	0	0	0	0	0	0	0	0	0	0	0	0	0	0	0	0	0	0
VWA5B1	0.165837	0	0	0	0	0	0	0	0	0	0	0	0	0	0	0	0	0	0	0	0.0166196	0	0	0	0	0	1.02564	0	0	0	0	0	0	0	0	0	2.8169	0
AL020998.1	0.165837	0	0	0	0	0	0	0	0	0	0	0	0	0	0	0	0	0	0	0	0	0	0	0	0	0	0	0	0	0	0	0	0	0	0	0	0	0
LINC01141	0	0	0	0	0	0	0	0	0	0	0	0	0	0	0	0	0	0	0	0	0	0	0	0	0	0	0	0	0	0	0	0	0	0	0	0	0	0
AL139254.1	0	0	0	0	0	0	0	0	0	0	0	0	0	0	0	0	0	0	0	0	0	0	0	0	0	0	0	0	0	0	0	0	0	0	0	0	0	0
AL139254.2	0	0	0	0	0	0	0	0	0	0	0	0	0	0	0	0	0	0	0	0	0	0	0	0	0	0	0	0	0	0	0	0	0	0	0	0	0	0
AL139254.3	0	0	0	0	0	0	0	0	0	0	0	0	0	0	0	0	0	0	0	0	0	0	0	0	0	0	0	0	0	0	0	0	0	0	0	0	0	0
CAMK2N1	6.30182	6.25	47.2973	63.4043	0	1.89781	3.98818	61.194	2.12766	1.31827	1.54211	0.647482	1.07527	1.43885	0	13.8889	66.6667	0.396825	1.0582	0.625	0.340701	37.5	40	0.724638	0.793651	1.2012	76.4103	1.6	0	21.0526	3.8835	25	7.69231	32	3.43137	1.62003	78.8732	2.30126
MUL1	4.64345	2.7439	9.45946	9.3617	2.43902	10.7543	5.76071	5.97015	8.51064	8.09793	6.52432	4.96403	7.23363	5.39568	14.2857	8.33333	22.2222	6.34921	16.0494	10.2083	16.1875	31.25	30	2.89855	2.38095	6.30631	10.7692	6.4	0	21.0526	10.6796	12.5	7.69231	20	18.6275	19.0099	12.6761	7.11297
RPS4XP4	0	0.152439	0	0	0	0.0486618	0	0	0	0	0	0	0	0	0	0	0	0	0	0	0	0	0	0	0	0	0	0	0	0	0	0	0	0	0	0.0113289	0	0
FAM43B	0	0	2.7027	1.2766	0	0	0	0	0	0	0	0	0	0	0	0	0	0	0	0	0.0166196	0	0	0	0	0	0	0	0	0	0	0	0	0	0	0	0	0
CDA	0.497512	0.762195	4.05405	1.2766	0	1.11922	2.51108	0	48.9362	0.188324	0.474496	32.1583	0.684262	1.79856	2.48447	11.1111	11.1111	19.0476	0.352734	20	9.46485	12.5	0	63.0435	1.5873	12.3123	0.512821	0	0	47.3684	1.66436	0	0	0	0.980392	1.16687	1.40845	10.251
PINK1	5.14096	3.65854	16.2162	16.1702	3.65854	16.1557	17.5775	29.8507	55.3191	11.8644	12.93	11.295	16.7155	12.9496	16.1491	19.4444	0	8.73016	32.0988	22.9167	40.103	25	50	20.2899	7.14286	13.9139	14.359	19.2	0	31.5789	32.7323	25	53.8462	16	31.3725	43.2083	18.3099	22.5941
MIR6084	0	0	0	0	0	0	0	0	0	0	0	0	0	0	0	0	0	0	0	0	0	0	0	0	0	0	0	0	0	0	0	0	0	0	0	0	0	0
PINK1-AS	0.331675	0.457317	0	0.425532	1.21951	0.924574	0.443131	0	2.12766	0.188324	0.355872	0.431655	0.879765	0.719424	1.86335	0	0	0.396825	1.23457	1.04167	0.631544	0	0	0	0	0.4004	0	1.6	0	5.26316	1.66436	0	0	0	1.47059	2.35641	0	0.627615
DDOST	25.0415	25	54.0541	32.766	20.7317	49.0024	33.5303	28.3582	76.5957	21.0923	21.3523	21.6547	41.4467	53.2374	32.9193	27.7778	44.4444	25.7937	48.6772	38.75	59.1823	68.75	30	0	30.1587	24.1241	25.641	80	52.9412	68.4211	61.9972	75	61.5385	40	47.0588	69.3327	28.169	36.6109
KIF17	0.331675	0.152439	0	0.425532	1.21951	1.31387	0.14771	1.49254	17.0213	9.4162	8.65955	0.0719424	0.879765	3.23741	10.559	2.77778	0	0	6.70194	8.95833	0.980555	0	0	1.44928	0.793651	0.800801	4.10256	1.6	0	0	0.416089	0	0	0	0	0.498471	1.40845	8.3682
AL663074.2	0	0	0	0	0	0	0	0	0	0.188324	0	0	0	0	0	0	0	0	0.529101	0	0	0	0	0	0	0	0	0	0	0	0	0	0	0	0	0	0	0
SH2D5	0	0	0	0	0	0	0	0	0	0	0	0	0	0	0	0	0	0	0.176367	0	0	0	0	0	0	0	0	0	0	0	0	0	0	0	0	0.373853	0	0
AL663074.1	0	0	0	0	0	0.0973236	0	0	0	0	0	0	0	0	0	0	0	0	0	0	0.0249294	0	0	0	0	0	0	0	0	0	0	0	0	0	0	0.0113289	0	0
HP1BP3	49.5854	47.1037	59.4595	54.0426	41.4634	66.0341	44.3131	55.2239	80.8511	43.1262	44.6026	48.0576	49.4624	61.1511	44.7205	50	66.6667	54.3651	34.3915	44.5833	72.8104	68.75	70	13.7681	62.6984	51.4515	49.2308	49.6	70.5882	94.7368	60.0555	62.5	53.8462	44	69.1176	79.778	61.9718	50.8368
EIF4G3	13.5987	9.90854	17.5676	16.5957	12.1951	24.7202	12.1123	17.9104	63.8298	12.9944	16.8446	25.2518	16.4223	29.8561	19.8758	22.2222	33.3333	20.6349	54.6737	27.2917	34.2031	50	60	15.2174	28.5714	26.2262	16.4103	16.8	23.5294	36.8421	37.448	37.5	30.7692	24	19.6078	48.0798	14.0845	24.8954
RNU7-200P	0	0	0	0	0	0	0	0	0	0	0	0	0	0	0	0	0	0	0	0	0	0	0	0	0	0	0	0	0	0	0	0	0	0	0	0	0	0
MIR1256	0	0	0	0	0	0	0	0	0	0	0	0	0	0	0	0	0	0	0	0	0	0	0	0	0	0	0	0	0	0	0	0	0	0	0	0	0	0
RPS15AP6	0	0.304878	0	0	0	0.291971	0.14771	0	2.12766	0	0	0.143885	0.0977517	0	0.621118	2.77778	0	0.396825	1.23457	0.208333	0.349011	6.25	0	0.724638	0	0.1001	0	0	0	0	0.416089	0	0	0	0	0.860995	0	0.627615
AL627311.1	0	0	0	0	0	0.0486618	0	0	0	0	0	0	0	0	0	0	0	0	0	0	0	0	0	0	0	0	0	0	0	0	0	0	0	0	0	0.0113289	0	0
HSPE1P27	0	0	0	0	0	0	0	0	0	0	0	0	0	0	0	0	0	0	0.176367	0	0.00830979	0	0	0	0	0.1001	0.512821	0	0	0	0.138696	0	0	0	0	0.0113289	0	0.209205
ECE1	8.95522	4.26829	25.6757	17.4468	8.53659	47.7372	2.65879	28.3582	89.3617	32.2034	64.2942	11.7266	20.3324	3.23741	68.323	16.6667	44.4444	9.92063	19.7531	47.0833	3.19096	6.25	10	43.4783	3.96825	7.50751	48.7179	20	0	68.4211	59.9168	62.5	53.8462	40	19.6078	16.0417	29.5775	63.3891
AL031005.1	0	0	0	0	0	0.0486618	0	1.49254	0	0.188324	0	0	0	0	0	0	0	0	3.88007	0	0.00830979	0	0	0	0	0	0	0	0	0	0	0	0	0	0	0	0	0
AL031728.1	0	0.152439	0	0	0	0.243309	0	0	0	0	0	0	0	0	0	0	0	0	0.176367	0	0.00830979	0	0	0	0	0	0	0	0	0	0	0	0	0	0	0.0113289	0	0.209205
PPP1R11P1	0	0	0	0	0	0	0	0	0	0	0	0	0	0	0	0	0	0	0	0	0.00830979	0	0	0	0	0	0	0	0	0	0	0	0	0	0	0	0	0
AL592309.1	0	0	0	0	0	0	0	0	0	0	0	0	0	0	0	0	0	0	0	0	0	0	0	0	0	0	0	0	0	0	0	0	0	0	0	0	0	0
AL592309.2	0	0	0	0	0	0	0	0	0	0	0	0	0	0	0	0	0	0	0	0	0	0	0	0	0	0	0	0	0	0	0	0	0	0	0	0	0	0
NBPF2P	0	0	0	0	0	0.0973236	0	0	0	0	0.118624	0.143885	0.195503	0	0	0	0	0	0.176367	0	0.0997175	0	0	0	0	0.1001	0.512821	0	0	0	0.138696	0	0	0	0	0.169933	0	0
HS6ST1P1	0	0	0	0	0	0	0	0	0	0	0	0	0	0	0	0	0	0	0	0	0	0	0	0	0	0	0	0	0	0	0	0	0	0	0	0	0	0
CROCCP5	0	0	0	0	0	0	0	0	0	0	0	0	0	0	0	0	0	0	0	0	0	0	0	0	0	0	0	0	0	0	0	0	0	0	0	0	0	0
NBPF3	2.15589	0.609756	2.7027	0.851064	1.21951	5.15815	0.295421	1.49254	0	1.50659	1.77936	1.15108	3.32356	0.719424	1.86335	5.55556	0	1.5873	4.40917	2.08333	2.72561	0	0	0	3.96825	1.8018	2.05128	0	0	5.26316	6.65742	0	0	0	2.45098	3.00215	2.8169	2.30126
PFN1P10	0	0	0	0	0	0	0	0	0	0	0	0	0	0	0	0	0	0	0	0	0	0	0	0	0	0	0	0	0	0	0	0	0	0	0	0	0	0
ALPL	2.32172	2.28659	5.40541	0.425532	0	9.00243	1.32939	0	25.5319	1.88324	2.37248	1.29496	13.6852	1.43885	8.07453	0	22.2222	2.38095	10.4056	4.79167	1.29633	0	20	75.3623	3.1746	2.1021	2.5641	4.8	5.88235	0	35.2288	12.5	30.7692	8	29.902	92.7042	2.8169	8.3682
LINC02596	0	0	0	0	0	0	0	0	0	0	0	0	0.0977517	0	0	0	0	0	0	0	0	0	0	0	0	0	0	0	0	0	0.277393	0	0	0	0.490196	0.657075	0	0
RAP1GAP	0.331675	0.609756	0	0	0	1.84915	0.738552	0	2.12766	0.188324	0.118624	0.215827	10.7527	1.07914	0.621118	0	0	0	4.93827	0.833333	0.373941	0	0	0	0	0.4004	0	1.6	0	10.5263	12.7601	50	46.1538	4	13.2353	48.0798	0	0.83682
USP48	23.0514	16.311	18.9189	15.3191	15.8537	33.9659	25.7016	17.9104	36.1702	12.806	14.7094	21.6547	26.002	26.9784	18.0124	30.5556	44.4444	23.4127	37.037	21.4583	29.0843	43.75	30	11.5942	26.1905	21.7217	14.359	45.6	23.5294	42.1053	37.8641	37.5	23.0769	20	30.8824	51.2972	23.9437	19.8745
AL590103.1	0	0	0	0	0	0	0	0	0	0	0	0	0	0	0	0	0	0	0	0	0	0	0	0	0	0	0	0	0	0	0	0	0	0	0	0	0	0
LDLRAD2	0	0	0	0	0	0.291971	0.886263	1.49254	6.38298	0	0.118624	0.143885	0.195503	0	0	0	0	0.396825	0	3.33333	0.0166196	0	0	0	1.5873	0	0.512821	5.6	0	0	0.416089	0	0	4	0.980392	0.396511	1.40845	1.25523
HSPG2	1.49254	1.98171	50	29.3617	1.21951	22.6277	12.5554	49.2537	93.617	3.20151	9.25267	0.791367	10.2639	0.719424	60.8696	27.7778	55.5556	2.38095	14.6384	93.3333	1.13013	6.25	40	3.62319	1.5873	0.900901	33.3333	4.8	11.7647	42.1053	17.0596	62.5	7.69231	28	65.1961	46.7883	19.7183	84.3096
AL590556.1	0	0	0	0.425532	0	0.145985	0	0	0	0	0	0	0	0	0	0	0	0	0.176367	1.04167	0.0166196	0	0	0	0	0.1001	0	0	0	0	0	0	0	0	0	0.090631	0	0.41841
AL590556.2	0	0.152439	0	0	0	0.0486618	0	0	0	0	0	0	0	0	0	0	0	0	0	0	0	0	0	0	0	0	0	0	0	0	0	0	0	0	0	0.260564	0	0
CELA3B	0	0	0	0	0	0	0	0	0	0	0	0	0	0	0	0	0	0	0	0	0.0166196	0	0	0	0	0	0	0	0	0	0	0	0	0	0	0	0	0
AL590556.3	0	0	0	0	0	0	0	0	0	0	0	0	0	0	0	0	0	0	0	0	0	0	0	0	0	0	0	0	0	0	0	0	0	0	0	0	0	0
RN7SL386P	0	0	0	0	0	0	0	0	0	0	0	0	0	0	0	0	0	0	0	0	0	0	0	0	0	0	0	0	0	0	0	0	0	0	0	0	0	0
RNU6-1022P	0	0	0	0	0	0	0	0	0	0	0	0	0	0	0	0	0	0	0	0	0	0	0	0	0	0	0	0	0	0	0	0	0	0	0	0	0	0
CELA3A	0	0	0	0	0	0	0	0	0	0	0	0	0	0	0	0	0	0	0	0	0.0498587	0	0	0	0	0	0	0	0	0	0	0	0	0	0	0	0	0
RN7SL186P	0	0	0	0	0	0	0	0	0	0	0	0	0	0	0	0	0	0	0	0	0	0	0	0	0	0	0	0	0	0	0	0	0	0	0	0	0	0
RNU6-776P	0	0	0	0	0	0	0	0	0	0	0	0	0	0	0	0	0	0	0	0	0	0	0	0	0	0	0	0	0	0	0	0	0	0	0	0	0	0
LINC01635	0.165837	0	0	0	0	0.243309	0	0	0	0	0.118624	0.0719424	0.0977517	0	0	0	0	0.396825	0.529101	0.625	0.631544	0	0	0	0	0.4004	0	0	0	0	0.138696	0	0	0	0	0.430497	0	0
LINC00339	8.62355	7.46951	10.8108	8.51064	9.7561	16.4477	7.53323	4.47761	4.25532	6.77966	4.98221	6.76259	10.5572	8.27338	4.96894	2.77778	22.2222	7.93651	19.9295	9.58333	13.1378	12.5	20	0	12.6984	8.10811	8.20513	8	11.7647	5.26316	13.1761	0	15.3846	0	7.84314	13.6173	5.6338	7.11297
CDC42	79.9337	71.4939	72.973	54.4681	56.0976	89.0024	70.4579	83.5821	89.3617	80.0377	79.3594	90.5755	79.6676	93.8849	78.882	50	88.8889	92.4603	91.5344	85.2083	96.6844	81.25	70	82.6087	88.8889	90.0901	80.5128	68	64.7059	94.7368	88.3495	87.5	84.6154	64	86.7647	92.7155	76.0563	82.0084
AL031281.2	1.16086	0.152439	1.35135	0	0	0.729927	0.295421	0	0	0.376648	0	0.143885	0.488759	0	0.621118	0	0	0.396825	0.705467	0.625	0.182815	0	0	0	0	0.1001	0	0	0	0	0.554785	0	0	0	0	0.657075	0	0.41841
AL031281.3	0	0	0	0	0	0	0	0	0	0	0	0	0	0	0	0	0	0	0	0	0	0	0	0	0	0	0	0	0	0	0	0	0	0	0	0	0	0
CDC42-IT1	2.81924	1.82927	1.35135	1.70213	1.21951	2.48175	1.92024	0	2.12766	0.376648	0.830368	2.15827	2.15054	3.95683	1.86335	2.77778	0	2.38095	7.76014	1.875	7.16304	0	0	5.07246	3.96825	2.4024	2.05128	0.8	0	0	3.6061	12.5	0	0	4.90196	5.51716	1.40845	1.46444
AL031281.1	0	0	0	0	0	0	0	0	0	0	0	0	0.0977517	0	0	0	0	0	0	0.208333	0.0249294	0	0	0	0	0	0	0	0	0	0	0	0	0	0	0.0113289	0	0
WNT4	0.331675	0.304878	0	0.425532	0	27.1533	0	0	2.12766	0.94162	0.711744	0.359712	7.82014	0	0	5.55556	0	0	11.9929	0	0.249294	6.25	0	0	1.5873	0.3003	0.512821	1.6	0	21.0526	20.527	37.5	0	0	4.41176	12.3145	1.40845	0.41841
AL445253.1	0	0	0	0	0	5.69343	0	0	0	0.376648	0	0	2.8348	0	0	0	0	0	2.6455	0.625	0.0914077	0	0	0	0	0.1001	0.512821	0	0	21.0526	3.19001	0	0	0	0.490196	1.65402	0	0
MIR4418	0	0	0	0	0	0	0	0	0	0	0	0	0	0	0	0	0	0	0	0	0	0	0	0	0	0	0	0	0	0	0	0	0	0	0	0	0	0
PPIAP34	0	0	0	0	0	0	0	0	0	0	0	0	0	0	0	0	0	0	0	0	0	0	0	0	0	0	0	0	0	0	0	0	0	0	0	0.0226578	0	0
AL591122.1	0	0	0	0	0	0	0	0	0	0	0	0	0	0	0	0	0	0	0	0	0	0	0	0	0	0	0	0	0	0	0	0	0	0	0	0	0	0
ZBTB40	7.62852	6.55488	9.45946	4.68085	2.43902	8.51582	6.20384	5.97015	10.6383	3.20151	5.10083	5.03597	10.6549	4.67626	4.96894	2.77778	22.2222	5.95238	15.5203	3.75	15.0906	25	0	0.724638	7.93651	8.00801	3.58974	10.4	5.88235	10.5263	11.5118	25	15.3846	8	17.1569	17.707	4.22535	6.90377
ZBTB40-IT1	0	0	0	0	0	0	0	0	0	0	0	0	0.0977517	0	0	0	0	0	0	0	0.0166196	0	0	0	0	0	0	0	0	0	0	0	0	0	0	0.0113289	0	0
EPHA8	0	0	0	0	0	0	0	0	0	0	0	0	0	0	0	0	0	0	0	0	0.0166196	0	0	0	0	0	0	0	0	0	0	0	0	0	0	0	0	0
MIR6127	0	0	0	0	0	0	0	0	0	0	0	0	0	0	0	0	0	0	0	0	0	0	0	0	0	0	0	0	0	0	0	0	0	0	0	0	0	0
C1QA	27.3632	33.0793	31.0811	31.9149	26.8293	44.9635	40.0295	41.791	17.0213	32.9567	33.6892	44.2446	44.5748	80.5755	32.2981	22.2222	33.3333	73.4127	43.739	43.125	99.2106	75	30	11.5942	30.1587	89.3894	32.8205	50.4	29.4118	52.6316	54.785	25	84.6154	12	37.7451	41.0672	36.6197	41.841
C1QC	15.5887	15.7012	9.45946	12.766	6.09756	25.1095	20.384	17.9104	8.51064	21.4689	16.4887	17.3381	22.3851	59.3525	14.2857	11.1111	22.2222	42.0635	17.6367	23.3333	90.7761	50	30	2.89855	19.0476	77.0771	23.0769	23.2	11.7647	21.0526	28.9875	12.5	15.3846	4	14.7059	20.6412	5.6338	16.1088
C1QB	41.1277	40.7012	27.027	43.8298	34.1463	60.3406	41.0635	49.2537	27.6596	48.5876	47.6868	48.2734	58.7488	64.0288	45.3416	47.2222	55.5556	71.4286	48.5009	54.1667	98.712	50	70	17.3913	33.3333	87.0871	46.1538	68	23.5294	63.1579	61.0264	25	84.6154	4	36.2745	54.3106	45.0704	47.6987
EPHB2	0.497512	0.609756	17.5676	5.10638	0	5.54745	0	0	0	0.564972	0.237248	4.46043	2.73705	2.8777	1.24224	2.77778	11.1111	4.36508	1.41093	0.625	4.22968	12.5	10	0	0	9.70971	0	0.8	0	10.5263	8.04438	25	0	4	1.96078	3.94245	0	0.41841
MIR4684	0	0	0	0	0	0	0	0	0	0	0	0	0	0	0	0	0	0	0	0	0	0	0	0	0	0	0	0	0	0	0	0	0	0	0	0	0	0
AL512444.1	0	0	0	0	0	0	0	0	0	0	0	0	0	0	0	0	0	0	0	0	0	0	0	0	0	0	0	0	0	0	0	0	0	0	0	0	0	0
MIR4253	0	0	0	0	0	0	0	0	0	0	0	0	0	0	0	0	0	0	0	0	0	0	0	0	0	0	0	0	0	0	0	0	0	0	0	0	0	0
LACTBL1	0	0	0	0	0	0	0	0	0	0	0	0	0	0	0	0	0	0	0	0	0	0	0	0	0	0	0	0	0	0	0	0	0	0	0	0	0	0
TEX46	0.165837	0	0	0	0	0	0	0	0	0	0.118624	0	0	0	0	0	0	0	0.529101	0	0.0166196	0	0	0	0	0	0.512821	0	0	0	0	0	0	0	0	0.0113289	0	0
KDM1A	9.12106	6.55488	16.2162	10.2128	12.1951	23.8443	14.1802	5.97015	48.9362	10.1695	8.77817	11.7266	19.1593	15.8273	13.6646	11.1111	11.1111	12.3016	37.3898	12.7083	29.0843	31.25	20	2.17391	18.254	11.6116	9.74359	13.6	23.5294	26.3158	27.7393	25	38.4615	24	19.6078	38.4049	8.4507	17.364
AL031428.1	0	0	0	0	0	0	0	0	0	0	0	0	0	0	0	0	0	0	0	0	0	0	0	0	0	0	0	0	0	0	0	0	0	0	0	0	0	0
MIR3115	0	0	0	0	0	0	0	0	0	0	0	0	0	0	0	0	0	0	0	0	0	0	0	0	0	0	0	0	0	0	0	0	0	0	0	0	0	0
AL031428.2	0	0	0	0	0	0	0	0	0	0	0	0	0	0	0	0	0	0	0	0	0	0	0	0	0	0	0	0	0	0	0	0	0	0	0	0	0	0
LUZP1	17.9104	15.8537	17.5676	19.5745	8.53659	34.5985	13.2939	17.9104	78.7234	42.5612	44.6026	8.41727	12.61	23.0216	49.0683	33.3333	44.4444	10.7143	28.5714	38.9583	38.7236	12.5	40	2.89855	13.4921	14.5145	16.4103	12	5.88235	42.1053	31.3454	37.5	23.0769	16	10.2941	20.1541	23.9437	46.2343
AL161672.1	0	0	0	0	0	0	0	0	0	0	0	0	0	0	0	0	0	0	0	0	0	0	0	0	0	0	0	0	0	0	0	0	0	0	0	0	0	0
RNU6-514P	0	0	0	0	0	0.145985	0	0	0	0	0.118624	0	0.0977517	0	0	0	0	0	0	0	0.00830979	0	0	0	0	0	0	0	0	0	0.138696	0	0	0	0	0.0453155	0	0
RNU6-135P	0	0	0	0	0	0.0486618	0.14771	0	0	0	0	0	0	0	0	0	0	0	0	0	0.00830979	0	0	0	0	0	0	0	0	0	0	0	0	0	0	0	0	0
HTR1D	0	0	0	0	0	0.0486618	0	0	0	0.188324	0.237248	0	0	0	0	0	0	0	0	0.208333	0	0	0	0.724638	0	0.1001	0	0	0	0	0.138696	0	0	0	0	0.0339866	0	0.209205
AL109936.1	0	0	0	0	0	0	0	0	0	0	0	0	0	0	0	0	0	0	0	0	0	0	0	0	0	0	0	0	0	0	0.138696	0	0	0	0	0.0113289	0	0
LINC01355	0.66335	0.914634	1.35135	2.97872	1.21951	5.40146	0.443131	1.49254	4.25532	0.564972	2.37248	0.28777	2.8348	1.07914	1.24224	2.77778	0	0	2.82187	1.25	0.689712	0	10	0	0.793651	0.700701	0.512821	4	0	5.26316	5.54785	12.5	0	0	2.45098	3.79517	1.40845	2.71967
AL109936.6	0.165837	0.152439	0	0	0	0.243309	0.295421	1.49254	0	0.188324	0.237248	0	0	0	0.621118	0	0	0	0.176367	0	0.0332392	0	0	0	0	0.1001	0	0	0	0	0.138696	0	0	0	0	0.113289	0	0
HNRNPR	48.0929	38.7195	56.7568	42.9787	37.8049	73.674	45.3471	55.2239	78.7234	42.3729	47.6868	47.6978	58.7488	62.5899	56.5217	41.6667	88.8889	58.3333	68.4303	55.4167	68.2234	93.75	80	7.97101	47.619	54.6547	45.641	42.4	52.9412	94.7368	78.3634	87.5	61.5385	64	53.4314	80.1631	47.8873	53.7657
ZNF436	0.829187	0.609756	1.35135	1.2766	2.43902	4.76886	0.738552	2.98507	8.51064	2.07156	2.84698	0.647482	1.56403	0	5.59006	0	0	1.5873	2.82187	5.41667	2.30181	6.25	10	0.724638	0	0.800801	3.07692	0	0	5.26316	4.02219	0	0	0	3.43137	2.7869	1.40845	5.43933
ZNF436-AS1	0.165837	0.457317	4.05405	2.12766	1.21951	4.28224	0.443131	0	2.12766	0.753296	0.711744	0.143885	0.58651	0.719424	1.86335	0	0	0.396825	8.64198	1.66667	1.03872	0	10	0	0	0.800801	1.53846	0	0	10.5263	3.05132	0	7.69231	0	0.490196	0.894981	2.8169	1.25523
RF00019-4	0	0	0	0	0	0	0	0	0	0	0	0	0	0	0	0	0	0	0	0	0	0	0	0	0	0	0	0	0	0	0	0	0	0	0	0	0	0
AL109936.2	0	0	0	0.425532	0	1.07056	0	0	0	0	0.118624	0	1.36852	0	0.621118	0	0	0	0.176367	0	0.0415489	0	0	0	0	0	0	0	0	0	1.94175	0	0	0	0.980392	1.58604	0	0
TCEA3	0.497512	2.7439	16.2162	14.0426	1.21951	33.09	0.886263	14.9254	4.25532	1.50659	2.4911	0.647482	35.8749	3.95683	3.10559	2.77778	0	1.19048	24.3386	9.58333	4.12166	56.25	0	0	0	0.600601	1.53846	3.2	0	5.26316	65.3259	50	61.5385	0	36.2745	55.183	8.4507	2.92887
AL357134.1	0	0	0	0	0	0	0	0	0	0	0	0	0.0977517	0	0	0	0	0	0	0	0	0	0	0	0	0	0	0	0	0	0.138696	0	0	0	0	0.0339866	0	0
ASAP3	0.165837	0.304878	9.45946	6.38298	0	3.84428	0.295421	0	10.6383	0.94162	2.13523	0.28777	5.27859	0.359712	2.48447	0	0	0	5.64374	9.375	0.598305	18.75	0	0	0	0.600601	1.53846	0	0	0	15.8114	25	53.8462	0	9.80392	21.0037	0	7.32218
E2F2	3.31675	0.304878	0	0	0	0.681265	0	0	0	0	0	2.01439	0.195503	1.07914	0	0	0	0.396825	0.176367	0	0.249294	0	0	0	3.1746	1.9019	0.512821	1.6	0	0	3.46741	0	0	0	3.92157	2.1185	0	0
AL021154.1	0	0	0	0	0	0.194647	0	1.49254	0	0	0	0	0.293255	0	0	0	0	0	0	0.416667	0.0332392	0	0	0	0	0	0	0	0	0	0	0	0	0	0	0.181262	0	0.41841
ID3	4.64345	5.33537	56.7568	48.9362	34.1463	47.6886	8.27179	71.6418	68.0851	91.5254	71.4116	5.39568	39.7849	28.777	81.3665	33.3333	77.7778	7.14286	30.3351	88.5417	39.1557	62.5	60	5.07246	7.14286	11.6116	95.3846	16	0	78.9474	40.0832	62.5	30.7692	72	87.2549	68.0073	71.831	83.0544
AL450043.1	0	0.152439	0	0	0	0	0	1.49254	0	0	0.118624	0	0	0	0.621118	0	0	0	0	0	0.00830979	0	0	0.724638	0	0	0	0	0	0	0	0	0	0	0	0.0113289	0	0
MDS2	0.66335	2.13415	0	0	3.65854	0.243309	0	1.49254	2.12766	0	0.118624	0	0.0977517	0	0	0	0	0	7.05467	0	0.0332392	0	0	0	1.5873	0	0	0	0	0	0.138696	0	0	0	0.490196	0.917639	0	0.209205
AL451000.1	0	0	0	0	0	0	0	0	0	0	0	0	0	0	0	0	0	0	0	0	0	0	0	0	0	0	0	0	0	0	0	0	0	0	0	0	0	0
RPL11	100	100	100	99.5745	100	100	100	100	100	94.9153	95.7295	99.9281	99.9022	100	99.3789	100	100	100	98.06	100	99.6925	100	90	55.0725	100	99.8999	97.9487	98.4	100	100	100	100	100	100	99.0196	99.7848	100	99.7908
ELOA	11.2769	9.90854	20.2703	15.3191	9.7561	27.3966	10.9306	8.95522	46.8085	12.6177	13.2859	14.3165	32.3558	21.9424	14.2857	8.33333	33.3333	11.1111	29.2769	17.9167	36.2556	50	40	2.89855	11.1111	15.8158	11.7949	19.2	41.1765	47.3684	36.6158	37.5	38.4615	16	40.6863	73.785	14.0845	18.41
ELOA-AS1	2.15589	1.98171	2.7027	2.55319	1.21951	7.98054	3.10192	1.49254	0	1.12994	1.06762	1.29496	4.30108	2.8777	4.34783	0	0	1.5873	10.4056	3.54167	4.88616	6.25	10	0.724638	2.38095	2.3023	2.5641	12.8	0	0	8.32178	0	0	0	2.94118	10.4566	5.6338	2.51046
PITHD1	22.8856	18.1402	29.7297	21.7021	20.7317	37.6642	27.1787	20.8955	40.4255	21.8456	18.8612	15.036	25.9042	27.6978	31.0559	16.6667	44.4444	15.873	35.8025	30.2083	48.7868	56.25	60	6.52174	19.8413	26.1261	24.1026	28.8	29.4118	10.5263	33.9806	25	61.5385	24	43.1373	60.5075	30.9859	30.9623
LYPLA2	14.7595	10.5183	13.5135	9.3617	8.53659	25.5474	11.5214	7.46269	65.9574	10.3578	9.96441	14.7482	20.4301	16.9065	14.9068	13.8889	11.1111	13.8889	61.1993	18.3333	33.2724	18.75	0	2.89855	10.3175	16.016	12.3077	15.2	5.88235	42.1053	30.5132	37.5	30.7692	16	30.3922	47.9891	8.4507	15.272
GALE	4.80929	1.82927	13.5135	2.97872	6.09756	22.6764	6.20384	1.49254	34.0426	2.25989	2.84698	3.02158	14.8583	11.8705	6.21118	2.77778	11.1111	3.57143	16.9312	12.7083	25.7936	43.75	10	5.07246	8.73016	5.10511	2.5641	12.8	11.7647	31.5789	50.6241	62.5	46.1538	8	24.5098	66.931	5.6338	7.74059
HMGCL	6.46766	8.38415	18.9189	16.1702	9.7561	23.309	13.1462	19.403	23.4043	10.7345	10.083	9.20863	15.2493	7.91367	12.4224	11.1111	44.4444	13.0952	35.8025	16.4583	34.71	31.25	40	5.07246	9.52381	13.2132	14.359	12.8	11.7647	36.8421	29.681	25	7.69231	12	33.3333	43.4123	12.6761	15.8996
FUCA1	7.79436	5.79268	18.9189	14.0426	7.31707	49.0511	17.5775	19.403	12.766	15.0659	11.8624	22.0144	38.6119	25.1799	18.0124	19.4444	22.2222	21.8254	52.381	16.25	78.2616	56.25	40	2.89855	10.3175	41.4414	10.7692	20.8	11.7647	26.3158	56.3107	62.5	61.5385	0	37.7451	48.9747	16.9014	18.6192
CNR2	0.66335	0.152439	0	0	12.1951	0.194647	0	0	0	0	0	0	0.391007	0	0	0	0	0.396825	0.176367	0	0.0498587	0	0	0	2.38095	0.2002	1.02564	0	0	0	0.138696	0	0	0	0	0.249235	0	0.41841
BTBD6P1	0.165837	0	0	0	1.21951	0	0	0	0	0	0.118624	0	0	0	0	0	0	0.396825	0	0	0.00830979	0	0	0	0	0	0	0	0	0	0	0	0	0	0	0	0	0
AL590609.3	0	0	0	0	0	0	0	0	0	0	0	0	0	0	0	0	0	0	0	0	0	0	0	0	0	0	0	0	0	0	0	0	0	0	0	0	0	0
MIR378F	0	0	0	0	0	0	0	0	0	0	0	0	0	0	0	0	0	0	0	0	0	0	0	0	0	0	0	0	0	0	0	0	0	0	0	0	0	0
AL590609.2	0	0	0	0	0	0	0	0	0	0	0	0	0	0	0	0	0	0	0.176367	0	0	0	0	0	0	0	0	0	0	0	0	0	0	0	0	0.0793021	0	0
PNRC2	37.8109	36.4329	48.6486	43.8298	25.6098	54.7445	28.8035	53.7313	74.4681	39.9247	37.841	33.4532	57.2825	46.0432	41.6149	30.5556	66.6667	40.873	49.2063	43.9583	61.8165	81.25	60	8.69565	37.3016	37.3373	37.9487	24.8	41.1765	31.5789	57.975	62.5	76.9231	40	59.8039	83.0973	45.0704	51.2552
SRSF10	41.6252	37.3476	54.0541	54.8936	37.8049	67.5912	35.5982	62.6866	80.8511	33.8983	37.9597	32.8777	57.5758	56.8345	46.5839	30.5556	33.3333	28.5714	79.7178	52.2917	65.049	81.25	80	10.1449	48.4127	39.3393	44.1026	44	47.0588	47.3684	72.3994	75	53.8462	64	66.1765	80.6163	56.338	54.8117
AL590609.1	0	0	0	0	0	0	0	0	0	0	0	0	0	0	0	0	0	0	0	0	0	0	0	0	0	0	0	0	0	0	0	0	0	0	0	0	0	0
AL591178.1	0	0	0	0	0	0	0	0	0	0	0	0	0	0	0	0	0	0	0.176367	0	0	0	0	0	0	0	0	0	0	0	0	0	0	0	0	0.725048	0	0
MYOM3	0	0.152439	0	0.425532	0	0.0486618	0.14771	0	2.12766	0	0.118624	0	0	0	0	0	0	0	0	0.625	0.0249294	0	0	0	0	0	0	0	0	0	0	0	0	0	0	0.0453155	0	0.83682
AL591178.2	0	0	0	0	0	0	0	0	0	0	0	0	0	0	0	0	0	0	0	0	0	0	0	0	0	0	0	0	0	0	0	0	0	0	0	0.0339866	0	0
IL22RA1	0	0	1.35135	0.851064	0	0.632603	0	0	0	0	0	0	0	0	0	0	0	0	2.29277	0	0.00830979	0	0	0	0	0	0	0	0	0	0.416089	0	0	0	0.490196	0.124618	0	0.209205
IFNLR1	1.16086	0.609756	1.35135	0.851064	0	3.16302	1.62482	0	0	0.188324	0.118624	0.143885	2.05279	7.19424	1.24224	0	0	0	5.11464	0	15.4063	6.25	0	0	0.793651	1.2012	0	7.2	11.7647	0	3.46741	12.5	7.69231	0	6.37255	5.03002	0	0.209205
AL590683.1	0	0.152439	0	0	0	0.243309	0	0	0	0	0	0	0.0977517	0	0	0	0	0	0	0	1.94449	0	0	0	0	0	0.512821	0	0	0	0.138696	0	7.69231	0	0	0.0793021	0	0
AL138902.1	0	0	0	0	0	0	0	0	0	0	0	0	0	0	0	0	0	0	0	0	0	0	0	0	0	0	0	0	0	0	0	0	0	0	0	0	0	0
GRHL3	0	0	0	0	0	2.09246	0	0	2.12766	0	0.118624	0	0.391007	0	0	0	0	0	0.705467	0	0.282533	0	0	0	0	0	0.512821	0.8	0	0	2.21914	0	0	0	0	0.0339866	0	0
STPG1	1.3267	0.609756	2.7027	1.70213	2.43902	4.67153	2.36337	5.97015	2.12766	6.02637	3.32147	1.07914	2.34604	1.79856	4.34783	11.1111	0	1.19048	43.9153	3.125	8.25993	12.5	10	0	0.793651	1.4014	2.5641	1.6	11.7647	10.5263	6.38003	0	0	4	7.84314	10.162	0	4.1841
NIPAL3	10.9453	11.4329	4.05405	5.10638	6.09756	28.9051	9.74889	4.47761	14.8936	10.5461	9.25267	3.66906	18.8661	12.2302	11.1801	8.33333	11.1111	5.95238	27.1605	10.8333	11.5672	31.25	10	0	7.93651	5.00501	2.05128	6.4	5.88235	21.0526	37.7254	12.5	30.7692	0	31.3725	37.5439	14.0845	9.83264
RCAN3AS	0.995025	0.457317	1.35135	0	0	0.53528	0	0	0	0.188324	0	0	1.07527	0.359712	0	0	0	0.793651	22.7513	0	0.631544	0	0	0	0	0.2002	0	0	0	10.5263	0.554785	25	0	0	0	0.815679	1.40845	0.209205
RCAN3	21.0614	43.1402	4.05405	3.40426	20.7317	26.4234	10.4874	5.97015	4.25532	4.33145	2.13523	8.05755	16.52	19.0647	5.59006	5.55556	22.2222	7.93651	74.4268	7.5	21.8963	12.5	20	0.724638	2.38095	8.10811	9.74359	12	17.6471	15.7895	30.0971	37.5	30.7692	4	23.0392	27.6311	4.22535	5.02092
AL445686.2	1.82421	5.64024	0	0.425532	1.21951	3.74696	0.738552	0	0	0.376648	0.237248	1.07914	2.34604	0	1.24224	2.77778	0	0.396825	14.1093	0.416667	1.3545	0	10	0	0.793651	0.800801	0	0	0	5.26316	4.57698	0	7.69231	0	2.94118	3.70454	2.8169	0.627615
NCMAP	0.331675	0	0	0	0	1.41119	0	0	0	0.188324	0.118624	0.143885	3.12805	0.719424	0	0	0	0	2.82187	0	0.141266	0	0	0.724638	0	0.2002	0	2.4	0	0	6.10264	0	23.0769	0	4.90196	20.4939	0	0
AL445686.1	0	0	0	0	0	0.0973236	0	0	0	0	0	0	0.293255	0	0	0	0	0	0.176367	0	0.0166196	0	0	0	0	0	0	0.8	0	0	0.554785	0	0	0	0	0.815679	0	0
RF00019-5	0	0	0	0	0	0	0	0	0	0	0	0	0	0	0	0	0	0	0	0	0	0	0	0	0	0	0	0	0	0	0	0	0	0	0	0	0	0
SRRM1	64.3449	57.9268	55.4054	50.6383	53.6585	82.8224	58.0502	59.7015	85.1064	51.6008	53.8553	57.1942	71.4565	73.741	62.1118	58.3333	88.8889	59.127	75.6614	66.4583	80.8542	87.5	70	21.0145	62.6984	63.4635	54.8718	60	58.8235	73.6842	77.2538	87.5	76.9231	64	59.8039	87.255	57.7465	60.4603
AL445648.1	0	0	0	0	0	0	0	0	0	0	0	0	0	0	0	0	0	0	0	0	0	0	0	0	0	0	0	0	0	0	0.277393	0	0	0	0	0	0	0
CLIC4	2.15589	2.28659	39.1892	40.8511	10.9756	16.253	12.26	73.1343	87.234	71.1864	67.9715	16.1871	10.6549	35.6115	63.354	16.6667	88.8889	17.4603	13.5802	55	57.5951	68.75	80	3.62319	4.7619	22.1221	53.8462	38.4	5.88235	21.0526	21.7753	62.5	46.1538	56	25	52.7473	59.1549	70.2929
RNU6-1208P	0	0	0	0	0	0	0	0	0	0	0	0	0	0	0	0	0	0	0	0	0	0	0	0	0	0	0	0	0	0	0	0	0	0	0	0.0113289	0	0
RUNX3	56.7164	33.5366	1.35135	3.40426	15.8537	7.54258	13.4417	2.98507	0	0.376648	0.711744	10.2878	3.0303	38.8489	0.621118	0	0	21.4286	2.46914	0.833333	11.9993	6.25	10	0.724638	68.254	18.1181	5.64103	8	11.7647	0	6.24133	0	7.69231	0	0.980392	1.78996	2.8169	1.46444
MIR6731	0	0	0	0	0	0	0	0	0	0	0	0	0	0	0	0	0	0	0	0	0	0	0	0	0	0	0	0	0	0	0	0	0	0	0	0	0	0
AL445471.1	0	0	0	0	0	0	0	0	0	0	0	0	0	0	0	0	0	0	0	0	0	0	0	0	0	0	0	0	0	0	0	0	0	0	0	0	0	0
AL445471.2	0	0	0	0	0	0	0	0	0	0	0	0	0	0	0	0	0	0	0	0	0	0	0	0	0	0	0	0	0	0	0	0	0	0	0	0	0	0
MIR4425	0	0	0	0	0	0	0	0	0	0	0	0	0	0	0	0	0	0	0	0	0	0	0	0	0	0	0	0	0	0	0	0	0	0	0	0	0	0
AL050344.2	0	0	0	0	0	0	0	0	0	0	0	0	0	0	0	0	0	0	0	0	0	0	0	0	0	0	0	0	0	0	0	0	0	0	0	0	0	0
AL050344.1	0.165837	0	0	0	0	0	0	0	0	0	0	0	0	0	0	0	0	0	0	0	0.00830979	0	0	0	0	0	0	0	0	0	0	0	0	0	0	0	0	0
AL121994.1	0	0	0	0	0	0	0	0	0	0	0	0	0	0	0	0	0	0	0	0.208333	0	0	0	0	0	0	0	0	0	0	0	0	0	0	0	0.0113289	0	0
AL031432.1	0.165837	0	0	0	0	0	0	0	0	0	0	0.143885	0	0	0	0	0	0	0.529101	0	0.0747881	0	0	0	0	0	0	0	0	0	0	0	0	0	0.490196	0.090631	0	0
SYF2	48.9221	47.1037	43.2432	41.7021	41.4634	74.1119	59.9705	58.209	78.7234	46.8927	39.9763	58.1295	54.8387	55.036	42.8571	52.7778	33.3333	58.3333	71.2522	71.25	75.2202	75	60	42.029	61.9048	54.8549	47.6923	32.8	35.2941	78.9474	72.1221	62.5	53.8462	40	49.0196	73.8869	40.8451	53.5565
AL031432.4	0.995025	1.21951	1.35135	0	0	3.79562	1.77253	0	6.38298	1.12994	0.948992	0.57554	2.8348	0.359712	1.24224	0	0	0	3.52734	1.04167	4.05518	0	20	0.724638	0.793651	0.900901	2.05128	1.6	0	5.26316	4.16089	0	0	0	1.96078	4.37295	1.40845	1.04603
AL031432.5	0	0.152439	0	0	0	0.0973236	0.14771	0	0	0	0	0	0	0	0	0	0	0	0.881834	0	0.0415489	0	0	0	0	0.1001	0	0	0	0	0.138696	0	0	0	0	0.169933	0	0
RSRP1	59.7015	57.9268	54.0541	51.9149	56.0976	64.2336	49.3353	44.7761	70.2128	51.9774	47.2123	35.1079	37.5367	53.9568	45.9627	61.1111	88.8889	36.5079	73.545	43.75	59.1491	62.5	40	52.1739	70.6349	47.5475	40.5128	51.2	64.7059	68.4211	66.9903	87.5	53.8462	56	60.2941	63.5097	40.8451	48.5356
AL031432.3	0	0	0	0	1.21951	0.729927	0.443131	0	0	0.564972	0.118624	0.28777	0.488759	0	0	0	0	0	1.41093	0.833333	0.490278	0	0	0	0	0.4004	0.512821	0	0	0	0.138696	0	0	0	0	0.509799	0	0.41841
AL031432.2	0.331675	0.914634	0	0	1.21951	0.145985	0	0	0	0	0	0	0	0	0	0	0	0.396825	0.176367	0	0.0166196	0	0	0	0.793651	0.2002	0	0	0	0	0.138696	0	0	0	0	0.113289	0	0.209205
RHD	0.66335	0.304878	0	0	0	0.243309	0	0	0	0	0	0	0.195503	0.359712	0	0	0	0	0	0	0.0415489	0	0	0	0	0.1001	0	0	0	0	0.277393	0	7.69231	0	0	0.124618	0	0
SDHDP6	0	0	0	0	0	0	0	0	0	0	0	0	0	0	0	0	0	0	0	0	0	0	0	0	0	0.1001	0	0	0	0	0.138696	0	0	0	0	0.0339866	0	0
AL928711.1	0	0	0	0	0	0	0	0	0	0	0	0	0	0	0	0	0	0	0	0	0	0	0	0	0	0	0	0	0	0	0	0	0	0	0	0	0	0
TMEM50A	57.3798	46.3415	71.6216	47.234	31.7073	65.2068	54.3575	68.6567	87.234	72.3164	63.3452	56.4748	55.8162	72.6619	59.6273	86.1111	77.7778	60.3175	72.8395	67.9167	88.4328	100	70	61.5942	56.3492	60.4605	57.4359	57.6	76.4706	78.9474	81.276	75	76.9231	48	78.4314	81.364	64.7887	70.7113
RHCE	0	0.152439	0	0	0	1.0219	0.738552	0	0	0.188324	0.237248	0.0719424	0.293255	0	0	0	0	0.793651	2.6455	0.208333	0.182815	0	0	0	0	0.1001	0	0	0	0	1.80305	0	23.0769	0	0	0.781693	0	0.209205
AL031284.1	0	0.152439	0	0	0	0.0486618	0	0	0	0	0	0	0.0977517	0	0	0	0	0	0	0	0.00830979	0	0	0	0	0	0	0	0	0	0	0	0	0	0	0.0113289	0	0
MACO1	9.61857	7.77439	13.5135	11.0638	8.53659	23.2117	15.6573	11.9403	51.0638	13.936	10.083	7.48201	17.6931	12.5899	20.4969	16.6667	55.5556	12.3016	30.3351	18.3333	24.8878	37.5	10	3.62319	7.93651	13.013	10.7692	26.4	11.7647	42.1053	39.6671	75	30.7692	12	32.3529	39.5604	9.85915	18.41
LDLRAP1	8.29187	19.6646	6.75676	8.08511	2.43902	31.9708	4.57903	10.4478	21.2766	6.02637	8.8968	4.02878	14.3695	3.95683	9.31677	8.33333	11.1111	4.36508	14.9912	6.25	17.2927	25	10	1.44928	2.38095	3.4034	13.3333	15.2	0	21.0526	35.6449	12.5	30.7692	8	16.1765	26.7815	12.6761	6.69456
AL606491.1	0.497512	0.762195	0	0	0	0.924574	0	0	0	0.564972	0.237248	0.0719424	0.293255	0.359712	0	0	0	0	0	0.625	0.415489	0	0	0	0.793651	0.1001	0	2.4	0	0	1.10957	0	0	0	0	0.725048	0	0.209205
MAN1C1	2.15589	4.57317	22.973	15.7447	0	20.438	4.43131	5.97015	31.9149	3.01318	3.32147	2.30216	6.94037	4.31655	3.72671	8.33333	11.1111	2.77778	5.46737	7.5	8.92471	25	10	0.724638	2.38095	3.3033	5.64103	0	0	31.5789	17.337	0	0	4	4.90196	9.36898	8.4507	4.1841
AL031280.1	0.497512	2.59146	0	1.2766	0	3.21168	1.03397	0	0	0	0.474496	0.28777	0.879765	0.359712	0.621118	2.77778	0	0	0.881834	0.208333	0.523517	6.25	0	0	0	0.500501	1.02564	0	0	15.7895	3.6061	0	0	0	0.490196	0.509799	0	0.41841
SELENON	2.32172	2.89634	18.9189	9.3617	0	22.3844	6.79468	5.97015	78.7234	14.3126	16.1329	11.0791	15.9335	13.3094	37.2671	41.6667	33.3333	13.8889	21.8695	33.5417	34.5937	37.5	30	1.44928	2.38095	8.90891	2.5641	4.8	0	10.5263	30.9293	37.5	38.4615	12	23.5294	40.9765	9.85915	33.8912
AL020996.2	0	0	0	0	0	0	0	0	0	0	0	0	0	0	0	0	0	0	0	0	0	0	0	0	0	0	0	0	0	0	0	0	0	0	0	0	0	0
AL020996.1	0.497512	0.457317	0	1.2766	0	1.6545	0.443131	1.49254	0	0.188324	0.355872	0.57554	0.977517	0.359712	0	0	11.1111	1.19048	4.7619	0.416667	0.698022	0	0	0.724638	1.5873	0.700701	1.53846	0	0	0	2.08044	0	0	0	0.490196	1.55206	0	0.41841
MTFR1L	6.13599	3.20122	14.8649	14.0426	8.53659	20.292	18.3161	17.9104	25.5319	10.5461	10.7948	8.84892	12.7077	12.2302	9.93789	19.4444	11.1111	10.7143	23.9859	13.3333	20.7163	25	10	2.17391	8.73016	11.4114	13.3333	12	5.88235	21.0526	20.3883	12.5	23.0769	4	16.1765	29.8742	19.7183	13.1799
AL020996.3	0	0	0	0	0	0	0	0	0	0	0	0	0	0	0	0	0	0	0	0	0	0	0	0	0	0	0	0	0	0	0	0	0	0	0	0	0	0
AUNIP	0.497512	0	0	0	0	0.243309	0	0	0	0	0	0.215827	0	0.359712	0	0	0	0	0	0	0.124647	0	0	0	0	0.3003	0	0.8	0	0	0.554785	0	0	0	0.490196	1.67667	0	0
AL033528.2	0	0.152439	0	0	0	0.243309	0.590842	0	0	0.188324	0	0.0719424	0.0977517	0	0	0	0	0	0.352734	0.208333	0.0914077	0	0	0	0.793651	0.2002	0	0	0	0	0.138696	0	0	0	0	0.226578	0	0.41841
PAQR7	1.16086	0.457317	4.05405	4.68085	0	24.3796	6.64697	2.98507	10.6383	1.88324	2.72835	2.44604	3.22581	2.8777	2.48447	0	11.1111	2.77778	22.2222	4.58333	0.988865	25	0	0	0	2.9029	5.64103	0.8	0	0	4.99307	0	0	8	6.86275	6.55942	1.40845	5.02092
RF00019-6	0	0	0	0	0	0	0	0	0	0	0	0	0	0	0	0	0	0	0	0	0	0	0	0	0	0	0	0	0	0	0	0	0	0	0	0	0	0
STMN1	26.0365	15.8537	16.2162	21.2766	10.9756	42.4331	77.8434	7.46269	42.5532	15.8192	25.5042	3.88489	15.4448	41.3669	52.1739	66.6667	11.1111	8.73016	40.5644	44.375	59.5563	75	60	2.89855	25.3968	16.4164	20	21.6	88.2353	26.3158	26.491	12.5	23.0769	0	41.1765	24.3458	8.4507	29.9163
SNRPFP2	0	0	0	0	0	0	0	0	0	0	0	0	0	0	0	0	0	0	0	0	0	0	0	0	0	0	0	0	0	0	0	0	0	0	0	0	0	0
AL033528.1	0	0	0	0	0	0	0	0	0	0	0	0	0	0	0	0	0	0	0	0	0	0	0	0	0	0	0	0	0	0	0	0	0	0	0	0.0339866	0	0
MIR3917	0	0	0	0	0	0	0	0	0	0	0	0	0	0	0	0	0	0	0	0	0	0	0	0	0	0	0	0	0	0	0	0	0	0	0	0.0113289	0	0
PAFAH2	8.12604	3.04878	1.35135	2.55319	2.43902	6.56934	9.60118	1.49254	4.25532	3.20151	2.60973	3.30935	5.8651	3.95683	1.86335	0	0	3.57143	12.8748	3.75	21.2731	12.5	10	0.724638	7.93651	4.4044	5.12821	4	29.4118	15.7895	11.0957	25	15.3846	0	12.7451	17.9336	5.6338	4.1841
RNU6-110P	0	0	0	0	0	0	0	0	0	0	0	0	0	0	0	0	0	0	0	0	0	0	0	0	0	0	0	0	0	0	0	0	0	0	0	0	0	0
RF00492	0	0	0	0	0	0	0	0	0	0	0	0	0	0	0	0	0	0	0	0	0	0	0	0	0	0	0	0	0	0	0	0	0	0	0	0	0	0
RF00283	0	0	0	0	0	0	0	0	0	0	0	0	0	0	0	0	0	0	0	0	0	0	0	0	0	0	0	0	0	0	0	0	0	0	0	0	0	0
EXTL1	0	0	0	1.2766	0	0.0973236	0	0	0	0	0	0	0	0	0	0	0	0	0	0.208333	0.00830979	0	10	0	0	0.1001	0	0	0	0	0	0	0	0	0	0.124618	1.40845	0
SLC30A2	0	0	0	0	0	0.0973236	1.62482	0	0	0	0	0	0	0	0	0	0	0	0.705467	0	0.0581685	0	0	0.724638	0	0.1001	0	0.8	0	0	0.416089	0	0	4	0	0.169933	0	0
AL391650.2	0	0	0	0	0	0	0.14771	0	0	0	0	0	0	0	0	0	0	0	0	0	0	0	0	0	0	0	0	0	0	0	0	0	0	0	0	0	0	0
TRIM63	0	0	0	0.425532	0	0.194647	8.71492	0	0	0	0	0	0.0977517	0	0	0	0	0	0	0	0.182815	0	0	0	0	0.1001	0	0	0	0	0	0	0	0	0	0.215249	0	0
PDIK1L	3.81426	3.81098	5.40541	2.55319	2.43902	10.0243	5.613	1.49254	12.766	3.9548	4.03321	2.94964	9.38416	2.51799	3.72671	5.55556	0	3.1746	11.4638	5.625	7.28768	6.25	20	0	4.7619	4.8048	3.58974	8	11.7647	10.5263	15.2566	50	15.3846	4	6.37255	16.6308	2.8169	5.43933
FAM110D	0	0.304878	0	1.70213	4.87805	5.40146	0.295421	2.98507	53.1915	29.9435	51.6014	0.431655	3.71457	0.719424	34.1615	5.55556	22.2222	0.396825	2.1164	72.5	1.1052	0	0	0	1.5873	0.800801	6.66667	3.2	0	21.0526	2.21914	0	7.69231	0	1.96078	2.63963	2.8169	57.3222
C1orf232	0	0	0	0	0	0.0486618	0	0	0	0	0	0	0	0	0	0	0	0	0	0	0	0	0	0	0	0	0	0	0	0	0	0	0	0	0	0.0113289	0	0
AL391650.1	0	0	0	0	0	0.0486618	0	0	0	0.188324	0	0	0.391007	0	0	0	0	0	0	0	0.0664783	6.25	0	0	0	0.1001	0	0	0	0	0.554785	0	7.69231	4	0	0.226578	0	0.41841
ZNF593	11.2769	10.9756	31.0811	19.1489	10.9756	45.7421	22.5997	17.9104	53.1915	10.9228	12.6928	20	36.4614	33.8129	22.9814	27.7778	22.2222	20.6349	46.7372	35.625	57.0384	81.25	70	2.17391	9.52381	27.5275	15.8974	37.6	11.7647	42.1053	53.6755	75	76.9231	32	45.098	76.0394	30.9859	26.569
CNKSR1	0.331675	0.609756	0	1.2766	0	19.6107	0	0	2.12766	2.07156	0.474496	0.215827	14.4673	0	0	2.77778	0	0	37.037	1.04167	0.357321	6.25	0	0.724638	1.5873	0.2002	0.512821	9.6	0	10.5263	24.9653	50	23.0769	0	26.9608	31.8228	0	0.627615
CATSPER4	0	0	0	0	0	0	0	0	0	0	0	0	0.0977517	0	0	0	0	0	0	0	0	0	0	0	0	0	0	0	0	0	0.138696	0	0	0	0	0.237906	0	0
AL355877.1	0	0.304878	0	0	0	1.75182	0.738552	0	0	0.188324	0.118624	0	1.95503	0	0	0	0	0.396825	4.93827	0.416667	0.199435	6.25	0	0	0	0.2002	0	0	0	5.26316	2.35784	12.5	0	0	0.980392	3.43265	1.40845	0.627615
AL355877.3	0	0	0	0.425532	0	0	0	0	0	0	0	0	0	0	0	0	0	0	0	0	0	0	0	0	0	0.1001	0	0	0	0	0	0	0	0	0	0.0339866	0	0
CEP85	2.48756	2.59146	2.7027	1.2766	2.43902	4.3309	4.13589	1.49254	2.12766	0.753296	0.948992	2.66187	1.36852	6.47482	1.24224	2.77778	0	3.96825	4.93827	0.833333	7.18797	6.25	10	1.44928	3.96825	4.3043	1.02564	0.8	0	0	5.68655	12.5	0	0	4.90196	9.35765	0	1.46444
AL355877.2	0	0	0	0	0	0.0486618	0	0	0	0	0	0	0	0.359712	0	0	0	0	0	0	0.0166196	0	0	0	0	0	0	0	0	0	0.138696	0	0	0	0.490196	0.0113289	0	0
SH3BGRL3	97.5124	92.5305	83.7838	62.1277	80.4878	88.3698	96.6027	59.7015	95.7447	77.0245	71.1744	99.9281	58.3578	97.1223	78.882	86.1111	88.8889	99.6032	75.3086	89.375	99.0859	81.25	70	93.4783	100	97.1972	63.5897	77.6	100	89.4737	78.9182	100	100	96	54.902	87.3796	54.9296	85.5649
UBXN11	8.12604	4.42073	10.8108	4.68085	7.31707	8.90511	9.60118	4.47761	6.38298	2.25989	2.4911	27.0504	6.54936	9.71223	3.10559	5.55556	0	26.5873	80.0705	4.79167	42.8951	37.5	20	2.17391	7.14286	19.4194	6.15385	7.2	5.88235	5.26316	11.7892	12.5	15.3846	0	11.2745	16.5515	5.6338	4.81172
CD52	86.5672	89.6341	16.2162	11.4894	97.561	14.8905	56.2777	4.47761	8.51064	5.27307	6.76157	47.7698	13.2942	74.8201	15.528	8.33333	22.2222	48.4127	18.1658	6.875	90.5435	43.75	30	9.42029	57.9365	43.4434	11.7949	31.2	64.7059	10.5263	22.4688	12.5	30.7692	8	13.7255	17.2765	12.6761	11.9247
CRYBG2	0.497512	1.06707	0	0	1.21951	2.48175	0	0	0	0.188324	0	0	0.58651	0	0	0	0	0	1.41093	0	0.0747881	0	0	0	0	0.1001	0	0	0	0	1.66436	0	0	0	8.33333	1.5294	1.40845	0
AL451139.1	0	0	0	0	0	0	0	0	0	0	0	0	0	0	0	0	0	0	0	0	0.0581685	0	0	0	0	0	0	0	0	0	0	0	0	0	0	0.0113289	0	0
ZNF683	7.46269	1.21951	0	0.425532	0	0.194647	0	0	0	0	0	0.143885	0	0	0	0	0	0	0	0	0.116337	0	0	0	0	0	0	0	0	0	0.277393	0	0	0	0	0.0226578	1.40845	0
LIN28A	0	0	0	0	0	0.0973236	0	0	0	0	0	0	0.195503	0	0	0	0	0	0.176367	0	0.0332392	0	0	0	0	0.1001	0	0	0	0	0	0	0	0	0	0.113289	0	0
DHDDS	5.97015	6.70732	12.1622	8.08511	3.65854	13.4307	11.0783	5.97015	27.6596	6.21469	5.81257	7.69784	10.1662	14.0288	9.31677	11.1111	11.1111	6.74603	17.9894	7.91667	24.3228	31.25	20	2.17391	9.52381	10.01	8.71795	20.8	0	15.7895	22.0527	37.5	46.1538	20	15.6863	27.7784	11.2676	7.32218
AL513365.1	6.30182	7.46951	10.8108	3.82979	2.43902	13.3333	3.10192	7.46269	19.1489	1.69492	0.948992	6.69065	9.28641	3.59712	3.72671	2.77778	0	7.53968	7.58377	14.7917	7.57853	18.75	0	0	4.7619	6.90691	1.53846	10.4	0	5.26316	13.5922	12.5	23.0769	20	5.39216	17.2199	2.8169	7.53138
AL513365.2	0.331675	0	0	0	0	0	0	0	0	0	0	0	0	0	0	0	0	0	0	0	0.00830979	0	0	0	0	0	0	0	0	0	0	0	0	0	0	0.0113289	0	0
HMGN2	57.8773	54.878	60.8108	62.5532	58.5366	74.6472	67.9468	64.1791	68.0851	43.3145	44.2467	71.1511	63.9296	78.777	50.9317	44.4444	77.7778	80.1587	89.9471	58.125	92.4298	87.5	80	22.4638	59.5238	69.6697	57.9487	68	64.7059	78.9474	81.1373	75	61.5385	64	70.098	91.7639	66.1972	50
DPPA2P2	0	0	0	0	0	0	0	0	0	0	0	0	0	0	0	0	0	0	0	0	0.00830979	0	0	0	0	0	0	0	0	0	0	0	0	0	0	0.0113289	0	0
RPS6KA1	16.5837	13.4146	4.05405	1.2766	12.1951	19.3674	16.9867	1.49254	19.1489	4.89642	6.64294	29.5683	12.7077	39.2086	11.1801	0	11.1111	24.6032	31.3933	2.29167	59.1574	25	0	32.6087	26.1905	25.5255	5.12821	8.8	29.4118	10.5263	18.1692	0	38.4615	4	40.1961	41.5203	1.40845	7.32218
MIR1976	0	0	0	0	0	0	0	0	0	0	0	0	0	0	0	0	0	0	0	0	0	0	0	0	0	0	0	0	0	0	0	0	0	0	0	0	0	0
RN7SL679P	0	0	0	0	0	0	0	0	0	0	0	0	0	0	0	0	0	0	0	0	0	0	0	0	0	0	0	0	0	0	0	0	0	0	0	0.0113289	0	0
RF00019-7	0	0	0	0	0	0	0	0	0	0	0	0	0	0	0	0	0	0	0	0	0	0	0	0	0	0	0	0	0	0	0	0	0	0	0	0	0	0
RNU7-29P	0	0	0	0	0	0	0	0	0	0	0	0	0	0	0	0	0	0	0	0	0	0	0	0	0	0	0	0	0	0	0	0	0	0	0	0	0	0
AL627313.1	0	0	0	0	0	0	0	0	0	0	0	0	0	0	0	0	0	0	0	0	0	0	0	0	0	0	0	0	0	0	0	0	0	0	0	0	0	0
RF01210	0	0	0	0	0	0	0	0	0	0	0	0	0	0	0	0	0	0	0	0	0	0	0	0	0	0	0	0	0	0	0	0	0	0	0	0	0	0
AL627082.1	0	0	0	0	0	0	0	0	0	0	0	0	0	0	0	0	0	0	0	0	0	0	0	0	0	0	0	0	0	0	0	0	0	0	0	0	0	0
AL512408.1	0.165837	0.152439	0	0.425532	0	0.243309	0	1.49254	0	0	0	0	0.293255	0	0	0	0	0.396825	0.705467	0	0.0914077	0	0	0	0.793651	0.3003	0	0	0	0	0.970874	0	0	0	0	0.373853	0	0
ARID1A	29.3532	27.8963	22.973	17.0213	25.6098	45.3041	25.5539	19.403	51.0638	26.5537	25.86	43.0216	43.7928	38.4892	26.7081	8.33333	44.4444	39.2857	51.3228	24.5833	51.396	43.75	40	31.1594	33.3333	41.4414	28.7179	27.2	29.4118	47.3684	55.0624	75	61.5385	24	43.6275	61.1193	23.9437	30.3347
PIGV	2.6534	2.13415	6.75676	5.53191	2.43902	14.8418	4.57903	1.49254	2.12766	4.14313	3.20285	3.66906	8.40665	5.7554	1.24224	8.33333	22.2222	5.15873	19.7531	4.79167	15.0656	25	10	5.07246	8.73016	5.00501	4.10256	8.8	5.88235	10.5263	17.6144	12.5	7.69231	4	18.1373	17.5711	2.8169	4.60251
RN7SL165P	0	0	0	0.851064	0	0.0973236	0	0	0	0	0	0	0.0977517	0	0.621118	0	0	0	0	0	0.0249294	0	0	0	0	0	0	0	0	0	0	0	0	0	0	0.10196	0	0.209205
ZDHHC18	10.2819	8.23171	2.7027	5.53191	6.09756	7.6399	4.87445	7.46269	4.25532	4.89642	5.9312	3.30935	7.42913	8.63309	2.48447	8.33333	0	5.15873	5.46737	6.45833	16.0794	37.5	0	37.6812	6.34921	7.40741	3.58974	12.8	0	10.5263	12.4827	25	23.0769	8	9.31373	15.9964	4.22535	5.85774
SFN	4.31177	3.96341	14.8649	1.70213	0	69.0024	0.443131	1.49254	27.6596	2.25989	2.84698	1.58273	24.9267	1.07914	1.86335	2.77778	0	2.38095	13.4039	2.29167	1.27971	12.5	0	10.1449	3.96825	1.5015	2.5641	4.8	0	26.3158	41.3315	87.5	30.7692	20	50.4902	72.4708	1.40845	1.67364
GPN2	4.31177	6.40244	12.1622	6.80851	7.31707	11.8248	4.13589	4.47761	29.7872	3.9548	6.28707	5.53957	8.3089	10.0719	9.93789	5.55556	22.2222	6.74603	13.2275	7.70833	21.3478	56.25	10	0.724638	7.93651	8.30831	5.12821	4.8	11.7647	15.7895	14.7018	0	15.3846	16	15.1961	30.2481	5.6338	10.0418
AL034380.1	0.165837	0	0	0	0	0	0	0	0	0	0	0	0	0	0	0	0	0	0	0	0.00830979	0	0	0	0	0	0	0	0	0	0	0	0	0	0.490196	0.0113289	0	0
GPATCH3	3.31675	2.59146	2.7027	4.25532	4.87805	5.15815	3.84047	1.49254	12.766	3.38983	3.44009	4.82014	4.98534	6.47482	4.34783	2.77778	0	3.96825	5.11464	5.83333	12.93	12.5	0	2.17391	3.96825	4.9049	2.5641	5.6	0	15.7895	6.79612	12.5	0	0	7.84314	10.5925	5.6338	4.60251
NUDC	34.3284	29.1159	56.7568	38.2979	25.6098	58.1995	46.0857	59.7015	89.3617	33.5217	29.4187	29.1367	49.6579	58.9928	35.4037	33.3333	66.6667	31.746	95.7672	49.375	74.0485	87.5	70	10.1449	35.7143	33.6336	40.5128	44.8	47.0588	63.1579	66.5742	87.5	69.2308	68	64.2157	82.0211	42.2535	44.5607
NR0B2	0	0.152439	0	0	0	0.0973236	0.14771	0	0	0.188324	0	0	2.05279	0	0	2.77778	0	0	0.705467	0.208333	0.0415489	0	0	0.724638	0.793651	0.2002	0.512821	0.8	0	0	0.138696	0	0	0	5.88235	14.0931	0	0.209205
KDF1	0.331675	0.304878	1.35135	0	0	12.8954	0.14771	0	0	0.376648	0.355872	0.28777	8.40665	0	0	0	0	0	15.3439	0.625	0.141266	0	0	0.724638	0	0	1.02564	2.4	0	5.26316	15.8114	25	30.7692	0	18.1373	22.5445	1.40845	0.209205
RPL12P13	0	0	0	0	0	0.486618	0	0	0	0	0	0	0	0.359712	0	0	0	0	0.352734	0.208333	0.0914077	0	0	0	0	0.1001	0	0	0	0	0.832178	0	0	0	0	0.453155	0	0
AL356390.1	0	0	1.35135	0	0	0.145985	0	0	0	0	0	0	0.293255	0	0	0	0	0	0.176367	0	0	0	0	0	0	0	0	0	0	0	0	0	0	0	0	0.226578	0	0
OSTCP2	0	0	0	0	0	0	0	0	0	0	0	0	0	0	0	0	0	0	0	0	0	0	0	0	0	0	0	0	0	0	0	0	0	0	0	0.0113289	0	0
TRNP1	0.497512	0.304878	2.7027	2.12766	0	10.1703	0	23.8806	2.12766	9.4162	1.54211	0.431655	2.93255	0.719424	3.72671	2.77778	11.1111	0	23.4568	0.416667	0.240984	25	40	1.44928	0	1.4014	12.8205	0	0	5.26316	5.68655	12.5	7.69231	20	17.1569	9.62955	28.169	1.25523
TENT5B	0.497512	0.152439	4.05405	1.70213	0	5.88808	0.14771	16.4179	2.12766	0.376648	0.118624	0.215827	9.87292	0.719424	1.86335	0	11.1111	0	5.64374	0.208333	0.116337	6.25	0	0.724638	0	0.3003	0	0	0	36.8421	7.21221	12.5	15.3846	4	29.902	29.4438	8.4507	0.41841
SLC9A1	4.64345	2.13415	9.45946	8.93617	2.43902	13.9173	18.9069	8.95522	14.8936	3.76648	4.74496	3.30935	7.52688	6.47482	9.31677	2.77778	33.3333	3.1746	8.28924	4.375	38.574	12.5	20	7.24638	3.1746	3.2032	7.69231	4	0	15.7895	17.337	12.5	46.1538	0	18.6275	37.7478	2.8169	5.64854
AL590640.2	0	0	0	0	0	0	0	0	0	0	0	0	0	0	0	0	0	0	0	0	0	0	0	0	0	0	0	0	0	0	0	0	0	0	0	0.0113289	0	0
CHCHD3P3	0	0	0	0	0	0.0486618	0	0	0	0	0	0.0719424	0	0	0	0	0	0	0.176367	0	0	0	0	0	0	0	0	0	0	0	0	0	0	0	0	0.0566444	0	0
NPM1P39	0.165837	0	0	0.425532	0	0.973236	0	0	0	0.564972	0.118624	0.28777	0.391007	0.359712	0	0	0	0	0.352734	0.416667	0.365631	0	0	0	0	0.2002	0	0	0	0	0.832178	0	0	0	0.980392	1.71066	0	0.209205
SNRPEP7	0	0	0	0	0	0	0	0	0	0	0	0	0	0	0	0	0	0	0	0	0	0	0	0	0	0	0	0	0	0	0	0	0	0	0	0.0113289	0	0
AL590640.1	0	0	0	0	0	0	0	0	0	0	0	0	0	0	0	0	0	0	0	0	0	0	0	0	0	0	0	0	0	0	0	0	0	0	0	0	0	0
WDTC1	6.30182	6.25	6.75676	6.80851	2.43902	15.9611	5.613	5.97015	19.1489	7.9096	6.16845	12.0863	16.2268	10.7914	7.45342	5.55556	22.2222	11.1111	41.4462	9.58333	14.3261	18.75	0	9.42029	11.9048	11.7117	8.20513	5.6	11.7647	26.3158	21.4979	37.5	15.3846	4	23.0392	29.5117	8.4507	9.62343
RF00019-8	0	0	0	0	0	0.0486618	0	0	0	0	0	0	0	0	0	0	0	0	0	0	0	0	0	0	0	0	0	0	0	0	0	0	0	0	0	0	0	0
FO393419.3	0	0	0	0	0	0.145985	0	0	0	0	0	0.215827	0.195503	0	0	0	0	0	0.529101	0	0.0415489	0	0	0	0	0.2002	0	0	0	0	0.416089	0	0	0	0	0.113289	0	0
TMEM222	10.1161	6.55488	17.5676	11.4894	10.9756	16.2044	9.15805	17.9104	29.7872	7.9096	10.9134	4.17266	14.3695	7.91367	10.559	22.2222	11.1111	9.52381	20.2822	7.91667	19.8355	50	30	5.07246	8.73016	10.2102	15.3846	15.2	23.5294	5.26316	18.4466	25	15.3846	8	25.9804	34.6664	12.6761	9.83264
RNU6-48P	0	0	0	0	0	0	0	0	0	0	0	0	0	0	0	0	0	0	0	0	0	0	0	0	0	0	0	0	0	0	0	0	0	0	0	0	0	0
ACTG1P20	0	0	0	0	0	0	0	0	0	0	0.118624	0	0	0	0	0	0	0	0	0	0.0166196	0	0	0	0	0	0	0	0	0	0.138696	0	0	0	0	0.10196	0	0
SYTL1	23.5489	13.1098	4.05405	1.2766	30.4878	61.1192	4.13589	4.47761	4.25532	1.88324	2.60973	4.2446	16.52	6.11511	1.86335	0	0	3.57143	66.4903	1.45833	14.808	12.5	0	5.07246	30.9524	5.60561	2.5641	36.8	0	5.26316	49.0985	37.5	84.6154	0	26.4706	27.2459	1.40845	2.30126
MAP3K6	2.98507	2.28659	16.2162	11.9149	3.65854	13.82	1.18168	17.9104	40.4255	30.5085	30.0119	4.82014	7.91789	9.71223	37.2671	5.55556	22.2222	5.15873	7.58377	30.625	6.82234	18.75	20	0.724638	0.793651	5.00501	18.9744	4	0	10.5263	14.5631	0	0	12	18.1373	31.0638	12.6761	37.8661
FCN3	12.6036	8.23171	8.10811	9.3617	14.6341	28.8564	4.72674	23.8806	44.6809	77.7778	99.6441	13.5971	24.3402	4.67626	86.9565	5.55556	66.6667	15.4762	20.9877	23.9583	11.5922	0	50	5.07246	12.6984	18.5185	31.2821	19.2	0	31.5789	25.3814	25	30.7692	16	17.1569	27.8351	19.7183	70.5021
CD164L2	0.165837	0.152439	0	0	0	4.28224	0	0	0	0.564972	0.237248	0.0719424	1.27077	0.359712	0	0	0	0	79.5414	0.208333	0.216055	0	0	0	0	0.3003	0	0	0	0	4.02219	12.5	38.4615	0	2.94118	5.3359	0	0.41841
FO393419.1	0	0	0	0	0	0	0	0	0	0	0	0	0	0	0	0	0	0	0	0	0	0	0	0	0	0	0	0	0	0	0	0	0	0	0	0	0	0
GPR3	0	0	1.35135	0	0	0.194647	0	0	8.51064	0.188324	0.711744	0	0.0977517	0	1.86335	0	0	0	0	1.25	0.0581685	0	0	0	0	0	0.512821	0.8	0	0	0.138696	0	0	0	0	0.713719	0	0.83682
WASF2	45.1078	42.6829	63.5135	59.1489	39.0244	79.3187	41.6544	71.6418	85.1064	85.1224	71.0558	66.7626	45.3568	66.5468	71.4286	77.7778	100	80.5556	73.7213	77.0833	80.9124	81.25	90	42.029	53.9683	76.6767	89.7436	50.4	23.5294	57.8947	74.7573	100	76.9231	36	65.1961	71.0434	61.9718	73.6402
FO393419.2	0	0	0	0	0	0	0	0	0	0	0	0.0719424	0	0	0	0	0	0	0	0	0.0332392	0	0	0	0	0	0	0	0	0	0	0	0	0	0	0.0226578	0	0
BX293535.1	0.331675	0.914634	0	0.851064	0	1.41119	0	0	0	0	0.118624	0.28777	0	0	0.621118	0	0	0	8.11287	0	0.0498587	0	0	0	0	0.3003	0	0	0	0	0.416089	0	0	0	0	0.090631	0	0
AHDC1	5.3068	4.42073	10.8108	9.3617	0	23.1144	1.4771	8.95522	10.6383	10.9228	12.0996	2.01439	12.9032	2.51799	11.8012	22.2222	33.3333	1.5873	22.3986	7.70833	2.90012	25	20	0.724638	9.52381	4.2042	18.4615	1.6	11.7647	10.5263	21.7753	37.5	15.3846	12	17.6471	13.9345	15.493	10.251
FGR	9.12106	4.11585	4.05405	5.53191	2.43902	8.07786	12.7031	8.95522	14.8936	35.0282	27.4021	72.5899	7.13587	45.6835	24.8447	8.33333	11.1111	66.6667	5.82011	10.4167	79.9568	25	30	60.1449	34.9206	52.953	7.17949	7.2	5.88235	15.7895	12.4827	0	15.3846	8	6.86275	8.16812	5.6338	15.8996
AL031729.1	0.497512	0.304878	0	0.425532	1.21951	0.389294	0	1.49254	2.12766	0	0	0.143885	0.488759	0	0	0	0	0	0.352734	0.625	0.290843	0	0	0	0	0.2002	0	0.8	0	0	0.554785	0	0	0	0	0.894981	0	0.209205
LINC02574	0	0	0	0.425532	0	0.0486618	0	0	0	0	0	0.0719424	0	0	0.621118	0	0	0	0	0.208333	0.157886	0	0	0	0	0.1001	0	0	0	0	0	0	0	0	0	0.0339866	0	0.209205
IFI6	22.5539	16.6159	29.7297	27.6596	10.9756	28.4672	20.8272	31.3433	34.0426	33.3333	30.7236	18.6331	44.086	46.7626	47.8261	22.2222	11.1111	23.4127	68.9594	32.0833	91.6154	56.25	60	2.89855	23.8095	29.029	28.2051	44.8	11.7647	36.8421	58.8072	50	76.9231	24	46.5686	33.8847	33.8028	33.682
AL445490.1	0	0	0	0	0	0	0	0	0	0	0	0	0	0	0	0	0	0	0	0	0	0	0	0	0	0	0	0	0	0	0	0	0	0	0	0.0113289	0	0
RNU6-949P	0	0	0	0	0	0	0	0	0	0	0	0	0	0	0	0	0	0	0	0	0	0	0	0	0	0	0	0	0	0	0	0	0	0	0	0	0	0
CHMP1AP1	0	0	0	0	0	0	0	0	0	0	0	0	0	0	0	0	0	0	0	0	0	0	0	0	0	0	0	0	0	0	0	0	0	0	0	0	0	0
RNU6-424P	0	0	0	0	0	0	0	0	0	0	0	0	0	0	0	0	0	0	0	0	0	0	0	0	0	0	0	0	0	0	0	0	0	0	0	0	0	0
FAM76A	10.7794	10.9756	10.8108	17.8723	10.9756	18.7835	8.4195	19.403	14.8936	11.4878	10.5575	10.9353	16.52	11.1511	11.8012	5.55556	44.4444	14.6825	40.0353	15.2083	20.5584	31.25	30	5.07246	5.55556	10.3103	24.6154	10.4	5.88235	26.3158	18.1692	37.5	23.0769	8	25	34.8136	26.7606	13.8075
AL020997.1	0	0.152439	0	0	0	0.194647	0	0	0	0	0	0.215827	0.0977517	0	0	0	0	0	0	0.416667	0.199435	0	0	0	0	0	0.512821	0	5.88235	0	0.138696	0	0	0	0	0.351195	0	0.209205
RPEP3	0	0	0	0	0	0.0486618	0	0	0	0	0	0	0	0	0	0	0	0	0.176367	0	0.0332392	0	0	0	0	0	0	0	0	0	0.138696	0	0	0	0	0.0679733	0	0
STX12	13.9303	12.1951	35.1351	25.1064	20.7317	30.7056	18.6115	34.3284	65.9574	45.1977	58.6002	28.9928	29.521	46.7626	57.1429	25	55.5556	35.3175	37.037	31.4583	71.7716	56.25	50	13.7681	17.4603	39.039	37.9487	24.8	5.88235	31.5789	36.6158	37.5	61.5385	28	53.4314	70.1144	36.6197	47.9079
AL020997.2	0.497512	0.609756	1.35135	1.2766	2.43902	0.389294	0.295421	1.49254	2.12766	2.44821	1.77936	0.359712	1.36852	0	2.48447	0	0	0	0.529101	0.416667	1.45421	0	0	0	0	0.600601	1.02564	0	0	5.26316	0.416089	0	0	0	1.47059	1.06491	0	1.88285
AL020997.3	0	0	1.35135	0	0	0.0973236	0.14771	0	0	0	0	0.0719424	0.0977517	0.719424	0	0	0	0	0.352734	0	0.357321	0	0	0	0	0.2002	0	0.8	0	0	0.138696	0	0	0	0	0.532457	0	0.41841
RNU6-1245P	0	0	0	0	0	0	0	0	0	0	0	0	0	0	0	0	0	0	0	0	0	0	0	0	0	0	0	0	0	0	0	0	0	0	0	0	0	0
PPP1R8	5.63847	7.0122	16.2162	6.38298	6.09756	16.9343	6.20384	8.95522	38.2979	10.3578	9.84579	7.98561	11.828	11.1511	7.45342	8.33333	11.1111	12.3016	22.0459	11.6667	19.877	18.75	20	0.724638	10.3175	11.4114	10.2564	7.2	11.7647	21.0526	19.4175	37.5	23.0769	16	18.6275	29.2058	1.40845	12.3431
SCARNA1	0	0	0	0	0	0.0486618	0	0	0	0	0	0.143885	0	0	0	0	0	0	0	0	0.00830979	0	0	0	0	0	0	0	0	0	0	0	0	0	0	0.0226578	0	0
THEMIS2	9.78441	4.42073	5.40541	5.10638	10.9756	4.57421	14.771	4.47761	6.38298	1.69492	1.77936	54.5324	3.0303	56.1151	3.10559	2.77778	0	58.7302	5.64374	3.125	78.2782	25	10	49.2754	27.7778	61.3614	2.5641	42.4	47.0588	31.5789	8.46047	0	15.3846	0	1.47059	5.85703	7.04225	4.1841
RPA2	25.3731	20.4268	28.3784	22.1277	26.8293	28.9538	25.5539	14.9254	48.9362	19.5857	16.4887	16.1151	17.2043	38.8489	17.3913	13.8889	22.2222	15.4762	32.2751	20.4167	38.7153	37.5	20	3.62319	37.3016	19.8198	12.3077	21.6	29.4118	63.1579	29.9584	0	30.7692	12	21.0784	34.2812	14.0845	22.5941
SMPDL3B	0.995025	0.304878	1.35135	0.851064	0	3.55231	0.295421	0	4.25532	0.564972	0.355872	0.143885	12.0235	3.59712	0.621118	0	0	0	1.94004	0.625	0.540136	43.75	0	1.44928	0.793651	0.4004	0	15.2	0	10.5263	8.18308	37.5	38.4615	0	25.4902	40.5914	0	0.627615
AL512288.1	0	0	0	0	0	0.194647	0	0	0	0	0	0	0	0	0	0	0	0	0.352734	0	0.0166196	0	0	0	0	0	0	0	0	0	0.416089	0	0	0	0	0.10196	0	0
XKR8	3.9801	1.67683	0	4.25532	4.87805	3.21168	1.62482	2.98507	17.0213	3.20151	4.62633	4.60432	2.44379	3.59712	4.34783	5.55556	0	4.36508	5.99647	2.91667	7.14642	6.25	0	5.07246	4.7619	4.5045	4.61538	7.2	0	0	5.96394	0	38.4615	4	7.84314	8.42868	4.22535	3.13808
EYA3	7.46269	5.64024	12.1622	6.80851	6.09756	15.1338	9.15805	7.46269	19.1489	13.1827	11.1507	6.69065	11.0459	17.9856	12.4224	2.77778	22.2222	6.34921	18.6949	12.0833	18.4644	12.5	30	5.07246	7.14286	6.90691	9.23077	9.6	11.7647	21.0526	18.4466	12.5	0	8	17.1569	28.73	5.6338	16.1088
AL512288.2	0	0	0	0	0	0	0	0	0	0	0	0	0	0	1.24224	0	0	0	0.176367	0.208333	0.0166196	0	0	0	0	0	0	0	0	0	0	0	0	0	0.490196	0.0679733	0	0
RN7SL559P	0.497512	0.457317	0	0.425532	1.21951	1.11922	0.886263	0	2.12766	1.31827	1.42349	0.57554	0.58651	0.719424	0	0	0	0	1.23457	0.625	2.62589	6.25	0	0.724638	1.5873	0.700701	0.512821	0.8	0	0	2.35784	0	0	0	1.47059	2.96817	0	1.25523
SPCS2P4	0.331675	0.457317	2.7027	0.851064	0	1.94647	0.295421	1.49254	0	0.376648	0.118624	0.215827	0.977517	1.43885	0	0	11.1111	0.396825	1.76367	1.25	2.32674	0	0	1.44928	1.5873	0.700701	0.512821	8.8	0	5.26316	2.21914	0	7.69231	0	0.980392	3.5686	1.40845	1.46444
AL137792.2	0	0	0	0	0	0	0	0	0	0	0	0	0	0	0	0	0	0	0	0	0	0	0	0	0	0	0	0	0	0	0	0	0	0	0	0.0113289	0	0
AL137792.1	0	0	0	0	0	0	0	0	0	0	0	0	0	0	0	0	0	0	0	0	0.00830979	0	0	0.724638	0	0.1001	0	0	0	0	0	0	0	0	0	0.0113289	0	0
RNU6-176P	0	0	0	0	0	0	0	0	0	0	0	0	0	0	0	0	0	0	0	0	0	0	0	0	0	0	0	0	0	0	0	0	0	0	0	0	0	0
PTAFR	1.49254	1.98171	2.7027	5.10638	2.43902	5.49878	19.3501	2.98507	17.0213	1.50659	2.25386	39.2806	3.12805	30.9353	4.96894	2.77778	0	30.5556	8.81834	14.7917	70.2759	25	0	42.7536	2.38095	34.8348	4.10256	4	17.6471	0	7.90569	0	7.69231	0	2.94118	5.06401	5.6338	12.5523
DNAJC8	49.9171	37.9573	45.9459	37.4468	29.2683	59.4161	46.6765	49.2537	80.8511	38.6064	37.7224	42.5899	45.9433	67.6259	50.9317	55.5556	77.7778	48.0159	59.612	51.875	75.8518	75	60	10.1449	47.619	46.1461	40.5128	37.6	41.1765	84.2105	59.0846	62.5	46.1538	64	51.4706	77.7727	49.2958	46.6527
ATP5IF1	63.5158	55.0305	70.2703	48.5106	41.4634	92.7007	69.8671	62.6866	74.4681	62.5235	57.7699	54.1727	75.1711	65.8273	56.5217	75	44.4444	59.5238	97.5309	75.2083	87.5769	93.75	80	15.2174	54.7619	57.5576	61.0256	75.2	64.7059	94.7368	89.7365	100	92.3077	64	83.8235	95.831	63.3803	71.1297
AL353622.1	2.98507	1.21951	1.35135	0.851064	1.21951	2.62774	0.443131	0	0	0	0.118624	0.503597	0.782014	0.359712	0	0	0	0.396825	35.8025	0.416667	0.822669	0	0	0	3.1746	1.4014	0	5.6	5.88235	0	4.02219	0	7.69231	0	0.980392	1.4501	1.40845	0.627615
AL353622.2	0	0.152439	0	0	1.21951	0	0	0	0	0	0	0	0	0	0	0	0	0	0	0	0.0166196	0	0	0	0.793651	0	0	0	0	0	0	0	0	0	0	0.0566444	0	0
SESN2	3.64842	2.59146	5.40541	5.53191	3.65854	9.48905	5.16987	2.98507	14.8936	1.88324	3.91459	3.59712	4.10557	17.9856	2.48447	5.55556	11.1111	0.793651	9.34744	4.375	30.8127	50	10	20.2899	7.93651	3.6036	3.07692	8	11.7647	0	9.98613	12.5	23.0769	4	10.2941	21.5475	4.22535	3.9749
MED18	4.64345	2.28659	2.7027	0.425532	0	6.618	2.51108	4.47761	2.12766	2.63653	2.4911	2.44604	3.81232	3.95683	6.21118	11.1111	11.1111	3.1746	12.6984	6.04167	12.7805	0	10	0.724638	3.96825	4.2042	2.5641	4	5.88235	5.26316	7.62829	12.5	7.69231	8	7.84314	9.02912	4.22535	4.39331
PHACTR4	13.9303	12.8049	20.2703	14.4681	6.09756	45.6934	19.4978	13.4328	57.4468	30.6968	35.7058	16.4029	30.7918	23.3813	35.4037	30.5556	66.6667	19.4444	51.4991	37.0833	34.8429	50	40	3.62319	16.6667	24.4244	25.641	15.2	29.4118	57.8947	57.5589	87.5	69.2308	8	36.7647	51.3651	16.9014	41.2134
RF00019-9	0	0	0	0	0	0	0	0	0	0	0	0	0	0	0	0	0	0	0	0	0	0	0	0	0	0	0	0	0	0	0	0	0	0	0	0	0	0
CR391992.1	0.165837	0.457317	0	0.425532	0	0.53528	0.443131	0	0	0	0.355872	0.143885	0.0977517	0	0	0	0	0	0.529101	0.208333	0.490278	0	0	0	0.793651	0.1001	0.512821	0	0	0	0.832178	0	7.69231	0	0.490196	0.691062	0	0
RNU6ATAC27P	0	0	0	0	0	0.0486618	0	0	0	0.188324	0	0	0	0	0	0	0	0	0.176367	0	0.0332392	0	0	0	0	0	0	0	0	0	0	0	0	0	0	0.124618	0	0.209205
RCC1	3.48259	1.37195	4.05405	0.425532	0	8.95377	2.36337	0	34.0426	0.753296	1.30486	2.51799	9.28641	7.19424	1.24224	0	0	4.7619	11.1111	2.70833	8.92471	18.75	0	1.44928	5.55556	3.1031	1.02564	2.4	0	5.26316	20.3883	50	0	20	13.7255	34.9269	1.40845	2.71967
SNHG3	22.3881	25.9146	17.5676	15.3191	19.5122	47.7372	8.12408	14.9254	53.1915	11.2994	10.3203	22.7338	47.8983	20.5036	11.8012	13.8889	22.2222	26.5873	31.9224	23.9583	25.3282	56.25	40	8.69565	23.0159	29.2292	20	18.4	17.6471	52.6316	52.7046	50	23.0769	44	20.5882	65.0957	15.493	17.5732
SNORA73A	0	0	0	0	0	0	0	0	0	0	0	0	0	0	0	0	0	0	0	0	0	0	0	0	0	0	0	0	0	0	0	0	0	0	0	0	0	0
SNORA73B	0	0	0	0	0	0	0	0	0	0	0	0	0	0	0	0	0	0	0	0	0.0332392	0	0	0	0	0	0.512821	0	0	0	0.277393	0	0	0	0	0.181262	0	0
PRDX3P2	0	0	0	0	0	0	0	0	0	0	0	0	0	0	0	0	0	0	0	0	0	0	0	0	0	0	0	0	0	0	0.138696	0	0	0	0	0.373853	0	0
AL513497.1	0.165837	0	0	0	0	0.291971	0.14771	0	2.12766	0	0	0.215827	0.879765	0	0	0	0	0.396825	0.352734	0.208333	0.0830979	0	0	0.724638	0	0	0	0	0	0	1.24827	0	0	0	2.45098	7.98686	0	0
TRNAU1AP	18.0763	12.6524	25.6757	15.7447	12.1951	26.2287	14.1802	22.3881	38.2979	11.1111	12.93	15.7554	25.1222	23.741	14.2857	16.6667	11.1111	12.3016	58.0247	20.4167	35.8567	56.25	40	3.62319	9.52381	16.3163	17.4359	15.2	17.6471	36.8421	33.1484	25	30.7692	8	31.3725	45.5308	21.1268	19.6653
SNHG12	15.4229	16.6159	9.45946	11.0638	19.5122	16.3017	15.9527	7.46269	17.0213	3.9548	3.32147	5.53957	12.9032	17.9856	9.93789	8.33333	0	6.34921	11.2875	10.625	36.347	37.5	60	2.17391	16.6667	10.1101	7.17949	16	5.88235	21.0526	19.4175	25	38.4615	28	21.0784	38.7221	12.6761	5.23013
SNORD99	0	0	0	0	0	0	0	0	0	0	0	0	0	0	0	0	0	0.396825	0	0	0.00830979	0	0	0	0	0	0	0	0	0	0	0	0	0	0	0.0679733	0	0
SNORA61	0	0	0	0	0	0	0	0	0	0	0	0	0	0	0	0	0	0	0	0	0	0	0	0	0	0	0	0	0	0	0	0	0	0	0	0	0	0
SNORA44	0	0	0	0	0	0	0	0	0	0	0	0	0	0	0	0	0	0	0	0	0	0	0	0	0	0	0	0	0	0	0	0	0	0	0	0	0	0
SNORA16A	0	0	0	0	0	0	0	0	0	0	0	0	0	0	0	0	0	0	0	0	0	0	0	0	0	0	0	0	0	0	0	0	0	0	0	0	0	0
SNORA16A-1	0	0	0	0	0	0	0	0	0	0	0	0	0	0	0	0	0	0	0	0	0	0	0	0	0	0	0	0	0	0	0	0	0	0	0	0	0	0
TAF12	20.398	15.2439	21.6216	21.2766	19.5122	31.7762	22.5997	22.3881	34.0426	22.2222	19.0985	19.4245	22.2874	33.8129	18.0124	30.5556	44.4444	23.8095	26.8078	27.9167	48.2716	50	20	13.7681	23.8095	22.1221	11.2821	25.6	17.6471	31.5789	33.0097	25	46.1538	32	24.0196	51.8749	22.5352	23.6402
RAB42	0.331675	0.304878	1.35135	2.55319	0	2.48175	1.32939	1.49254	0	0.188324	0.711744	0.28777	1.07527	1.43885	0	2.77778	0	0.793651	1.5873	0.208333	26.7908	18.75	10	0	0.793651	2.8028	0.512821	4.8	0	0	3.8835	0	7.69231	0	0.490196	2.92285	2.8169	0.41841
LINC01715	0.165837	0.457317	1.35135	0.851064	0	0.729927	0.443131	0	0	0.188324	0	0.359712	0.195503	0.359712	0	0	11.1111	0	0.705467	0.833333	0.432109	0	0	0	0	0.500501	0	2.4	0	0	0.554785	0	0	0	0	0.589102	0	0.209205
AL360012.1	0	0	0	0	0	0	0	0	0	0	0	0	0	0	0	0	0	0	0	0	0	0	0	0	0	0	0	0	0	0	0	0	0	0	0	0	0	0
RNU11	0	0	1.35135	0	0	0	0	0	0	0	0	0	0.195503	0.359712	0	0	0	0	0	0	0.0415489	0	0	0	0	0.1001	0	0	0	0	0	0	0	0	0	0.090631	0	0
GMEB1	10.4478	7.31707	10.8108	12.766	9.7561	13.6253	12.5554	4.47761	34.0426	6.77966	8.77817	10	12.9032	21.9424	16.1491	0	11.1111	9.52381	17.8131	8.54167	23.0846	25	20	10.1449	11.9048	12.5125	7.17949	10.4	11.7647	21.0526	17.0596	25	15.3846	8	14.2157	20.7885	16.9014	11.7155
RF00422	0	0	0	0	0	0	0	0	0	0	0	0	0	0	0	0	0	0	0	0	0	0	0	0	0	0	0	0	0	0	0	0	0	0	0	0	0	0
YTHDF2	20.2322	19.5122	37.8378	22.9787	15.8537	50.0243	29.2467	37.3134	51.0638	32.9567	33.3333	26.9065	45.4545	48.2014	36.0248	30.5556	55.5556	27.7778	52.0282	42.5	66.0462	87.5	40	9.42029	21.4286	31.7317	27.1795	32.8	41.1765	36.8421	57.5589	75	69.2308	20	60.7843	74.476	23.9437	42.0502
OPRD1	0	0	0	0	0	0.0973236	0	0	0	0.188324	0	0	0	0	0	0	0	0.396825	0	0	0.0332392	0	0	0	0	0	0	0	0	0	0	0	0	0	0	0.339866	0	0
AL009181.1	0	0.152439	0	0	0	0.0486618	0	0	0	0	0	0.0719424	0	0	0	0	0	0	0.529101	0	0	0	0	0	0	0	0	0	0	0	0	0	0	0	0	0.645746	0	0
RF00019-10	0	0	0	0	0	0	0	0	0	0	0	0	0	0	0	0	0	0	0	0	0	0	0	0	0	0	0	0	0	0	0	0	0	0	0	0	0	0
EPB41	42.6202	38.1098	10.8108	5.95745	36.5854	23.3577	9.8966	11.9403	12.766	11.8644	14.828	18.4892	23.3627	23.0216	13.0435	11.1111	22.2222	18.6508	19.0476	12.2917	20.9157	25	20	34.7826	41.2698	11.5115	6.66667	28.8	23.5294	5.26316	31.484	25	30.7692	4	32.3529	61.4705	4.22535	17.9916
AL138785.1	0	0	0	0	0	0.0486618	0	0	0	0	0	0	0.0977517	0	0	0	0	0	0	0	0.0415489	0	0	0	0	0	0	0	0	0	0	0	0	0	0	0.169933	0	0
RF00019-11	0	0	0	0	0	0	0	0	0	0	0	0	0	0	0	0	0	0	0	0	0	0	0	0	0	0	0	0	0	0	0	0	0	0	0	0	0	0
RF00017	0.165837	0.304878	0	0	0	0.194647	0	0	0	0	0	0.143885	0.293255	0	0	0	0	0	0	0.416667	0.0664783	0	0	0.724638	0.793651	0	0	1.6	0	0	0	0	0	4	0	0.747706	0	0
TMEM200B	0.165837	0.304878	4.05405	7.65957	0	0.437956	0	5.97015	0	0	0.59312	0.28777	0.293255	0	0	0	0	0	1.41093	0.625	0.0415489	6.25	0	0	0	0	3.58974	0	0	0	0.416089	0	0	4	0.490196	0.283222	2.8169	0.209205
AL357500.1	0	0	0	0	0	0	0	0	0	0	0	0	0.0977517	0	0	0	0	0	0	0	0.00830979	0	0	0	0	0	0	0	0	0	0	0	0	0	0	0.0226578	0	0
SRSF4	36.9818	32.9268	44.5946	45.1064	34.1463	57.8589	36.3368	44.7761	85.1064	33.145	48.6358	37.6978	52.1994	64.0288	58.3851	19.4444	66.6667	39.2857	66.843	51.875	69.5114	68.75	90	29.7101	45.2381	42.3423	37.9487	48	41.1765	57.8947	65.8807	75	61.5385	36	56.3725	81.6359	46.4789	60.0418
RF02271	0	0	0	0	0	0	0	0	0	0	0	0	0	0	0	0	0	0	0	0	0	0	0	0	0	0	0	0	0	0	0	0	0	0	0	0	0	0
MECR	2.32172	2.43902	14.8649	6.38298	4.87805	15.2311	5.31758	8.95522	31.9149	3.76648	2.60973	2.73381	7.82014	6.83453	4.96894	0	0	1.98413	12.1693	8.33333	17.9824	18.75	20	0.724638	0.793651	4.7047	6.15385	8	11.7647	10.5263	23.8558	12.5	7.69231	8	13.2353	23.8926	8.4507	6.27615
AL590729.1	0	0	0	0	0	0	0	0	0	0	0	0	0	0	0	0	0	0	0	0	0	0	0	0	0	0	0	0	0	0	0	0	0	0	0	0	0	0
PTPRU	0	0.304878	2.7027	3.40426	0	25.4015	0.14771	4.47761	4.25532	1.50659	0.711744	0.503597	15.0538	0.359712	0	0	11.1111	0.396825	28.2187	1.45833	0.40718	0	0	0	0	0.2002	1.02564	0.8	0	10.5263	29.4036	75	15.3846	4	26.4706	29.4891	4.22535	1.04603
LINC01756	0	0	0	0	0	0	0	0	0	0	0	0	0	0	0	0	0	0	0	0	0	0	0	0	0	0	0	0	0	0	0	0	0	0	0	0	0	0
AL671862.1	0	0	0	0	0	0	0	0	0	0	0	0	0	0	0	0	0	0	0	0	0	0	0	0	0	0	0	0	0	0	0	0	0	0	0	0	0	0
AC092265.1	0	0	0	0	0	0.145985	0	0	0	0	0	0	0	0	0	0	0	0	0	0	0	0	0	0	0	0	0	0	0	0	0	0	0	0	0	0	0	0
AL645944.2	0	0	0	0	0	0	0	0	0	0	0	0	0	0	0	0	0	0	0	0	0	0	0	0	0	0	0	0	0	0	0	0	0	0	0	0	0	0
AL645944.1	0	0	0	0	0	0	0	0	0	0	0	0	0	0	0	0	0	0	0	0	0	0	0	0	0	0	0	0	0	0	0	0	0	0	0	0	0	0
LINC01648	0	0	0	0	0	0	0	0	0	0	0	0	0	0	0	0	0	0	0	0	0	0	0	0	0	0	0	0	0	0	0	0	0	0	0	0	0	0
AL137076.1	0	0	0	0	0	0	0	0	0	0	0	0	0	0	0	0	0	0	0	0	0.116337	0	0	0	0	0	0	0	0	0	0	0	0	0	0	0.0226578	0	0
AL021921.1	0	0	0	0	0	0	0	0	0	0	0	0	0	0	0	0	0	0	0	0	0	0	0	0	0	0	0	0	0	0	0	0	0	0	0	0	0	0
AL161638.2	0	0	0	0	0	0	0	0	0	0	0	0	0	0	0	0	0	0	0	0	0	0	0	0	0	0	0	0	0	0	0	0	0	0	0	0	0	0
AL161638.1	0	0	0	0	0	0	0	0	0	0	0	0	0	0	0	0	0	0	0	0	0	0	0	0	0	0	0	0	0	0	0	0	0	0	0	0	0	0
MATN1	0	0	0	0.425532	0	0.0973236	0	0	0	0	0	0	0	0	0	0	0	0	0.176367	0	0.0498587	0	0	0	0	0	0	0	0	0	0	0	0	0	0	0.192591	0	0
MATN1-AS1	1.3267	2.13415	0	0.851064	4.87805	1.36253	0.443131	0	4.25532	0.376648	0.237248	0.503597	0.488759	0.359712	0.621118	0	0	0	2.29277	0.625	0.847598	0	20	0	2.38095	0.500501	0.512821	1.6	0	0	1.66436	0	0	0	0.490196	2.63963	1.40845	1.04603
LAPTM5	68.1592	64.6341	9.45946	12.3404	90.2439	18.4428	93.0576	16.4179	31.9149	20.1507	20.9964	96.6906	18.2796	97.482	23.6025	75	11.1111	96.8254	17.6367	15.4167	99.6759	31.25	30	98.5507	57.9365	99.3994	17.9487	32	88.2353	15.7895	27.7393	0	38.4615	0	12.7451	23.666	18.3099	21.5481
MIR4420	0	0	0	0	0	0	0	0	0	0	0	0.0719424	0	0	0	0	0	0	0	0	0	0	0	0	0	0	0	0	0	0	0	0	0	0	0	0	0	0
AL137027.1	0	0	0	0	0	0	0	0	0	0	0	0	0	0	0	0	0	0	0	0	0	0	0	0	0	0	0	0	0	0	0	0	0	0	0	0.0226578	0	0
LINC01778	0	0	0	0	0	0.145985	0	0	0	0.188324	0.237248	0	0	0	0	0	0	0	0	0	0.0498587	0	0	0	0	0	0	0	0	0	0	0	0	0	0	0.351195	1.40845	0
RN7SKP91	0	0	0	0	0	0	0	0	0	0	0	0	0	0	0	0	0	0	0	0	0	0	0	0	0	0	0	0	0	0	0	0	0	0	0	0	0	0
AL445235.1	0	0	0	0	0	0	0	0	0	0	0	0	0	0	0	0	0	0	0	0	0	0	0	0	0	0	0	0	0	0	0	0	0	0	0	0	0	0
SDC3	0.829187	0.457317	14.8649	9.3617	7.31707	6.18005	4.87445	19.403	6.38298	19.3974	14.5907	2.3741	3.42131	2.51799	19.2547	27.7778	0	7.93651	2.6455	1.875	16.4035	6.25	50	0	1.5873	21.1211	14.359	4	0	5.26316	9.29265	12.5	15.3846	4	15.1961	13.1981	12.6761	4.60251
RN7SL371P	0	0	0	0	0	0	0	0	0	0	0	0	0	0	0	0	0	0	0	0	0	0	0	0	0	0	0	0	0	0	0	0	0	0	0	0.0226578	0	0
PUM1	26.0365	20.8841	27.027	31.9149	17.0732	52.7007	24.8154	37.3134	70.2128	26.3653	31.554	38.8489	49.6579	37.0504	38.5093	30.5556	77.7778	42.0635	62.6102	43.5417	59.4399	68.75	70	13.0435	32.5397	40.1401	33.8462	28.8	23.5294	47.3684	64.0777	87.5	69.2308	8	50	71.5079	26.7606	38.9121
AL356320.2	0	0	0	0	0	0.145985	0	0	0	0	0	0	0	0	0	0	0	0	0.176367	0	0.00830979	0	0	0	0	0	0	0	0	0	0.554785	0	0	0	0	0.0566444	0	0
AL356320.1	0.165837	0.152439	0	0.425532	0	0.145985	0.14771	0	0	0	0	0.0719424	0	0	0	0	0	0	0.176367	0	0.0664783	0	0	0	1.5873	0	1.53846	0	0	5.26316	0.277393	0	0	0	0.490196	0.124618	0	0
SELENOWP1	0	0	0	0	0	0	0	0	0	0	0	0	0	0	0	0	0	0	0	0	0	0	0	0	0	0	0	0	0	0	0	0	0	0	0	0	0	0
AC114495.1	0	0	0	0	0	0	0	0	0	0	0	0	0	0	0	0	0	0	0	0	0.00830979	0	0	0	0	0	0	0	0	0	0	0	0	0	0	0.0113289	0	0
NKAIN1	0	0	0	0	0	0.0486618	0	0	0	0	0	0.0719424	0	0	0	0	11.1111	0	0	0	0.0581685	0	0	0	0	0	0	0	0	0	0.277393	0	0	0	0	0.0113289	0	0
SNRNP40	17.2471	10.2134	29.7297	14.4681	4.87805	29.4404	15.0665	11.9403	51.0638	16.7608	16.8446	10.2878	17.9863	25.5396	19.8758	16.6667	44.4444	15.873	32.9806	24.375	37.0284	43.75	40	1.44928	19.8413	14.5145	17.4359	16.8	17.6471	26.3158	34.3967	37.5	23.0769	16	27.451	42.472	16.9014	20.7113
AC114495.2	0.995025	0.762195	0	0.851064	1.21951	1.60584	0.443131	0	6.38298	0.564972	0.830368	0.57554	0.977517	0	1.86335	0	0	0	1.41093	1.04167	1.25478	0	0	0	2.38095	0.500501	1.02564	0	0	0	1.10957	0	0	0	2.45098	1.64269	0	0.627615
ZCCHC17	19.403	13.4146	29.7297	17.4468	20.7317	38.2482	24.8154	17.9104	51.0638	17.8908	18.624	15.9712	26.0997	23.0216	29.8137	11.1111	22.2222	23.8095	34.9206	28.3333	43.4519	37.5	20	4.34783	27.7778	18.6186	18.9744	24	35.2941	31.5789	39.1123	62.5	30.7692	16	30.3922	51.4444	29.5775	25.7322
AL451070.1	0	0	0	0	0	0	0	0	0	0	0	0	0	0	0	0	0	0.396825	0	0	0.0581685	0	0	0	0	0	0	0	0	0	0	0	0	0	0	0	0	0.209205
FABP3	0.331675	0.304878	2.7027	1.70213	1.21951	0.681265	3.39734	5.97015	0	0.188324	0.118624	0.359712	0.488759	3.23741	1.24224	0	11.1111	0	1.76367	0.833333	26.3254	0	0	0	0.793651	1.5015	0	3.2	0	0	1.94175	0	0	0	2.94118	1.58604	2.8169	0.627615
SERINC2	1.99005	1.06707	2.7027	1.2766	0	41.0219	7.0901	2.98507	12.766	3.01318	0.948992	5.82734	19.1593	3.59712	1.24224	2.77778	0	3.57143	40.388	5	38.7485	12.5	0	2.89855	2.38095	3.4034	1.53846	4.8	0	31.5789	72.6768	75	76.9231	0	45.098	40.1495	2.8169	3.34728
AC209007.1	0	0	0	0	0	0	0	0	0	0	0	0	0	0	0	0	0	0	0	0	0.0166196	0	0	0	0	0	0	0	0	0	0	0	0	0	0	0	0	0
RNU6-40P	0	0	0	0	0	0	0	0	0	0	0	0	0	0	0	0	0	0	0	0	0	0	0	0	0	0	0	0	0	0	0	0	0	0	0	0	0	0
LINC01225	0	0	0	0	0	0	0	0	0	0	0	0	0	0	0	0	0	0	0.176367	0	0.00830979	0	0	0	0	0	0	0	23.5294	0	0	0	0	0	0	0	0	0
RF00019-12	0	0	0	0	0	0	0	0	0	0	0	0	0	0	0	0	0	0	0	0	0	0	0	0	0	0	0	0	0	0	0	0	0	0	0	0	0	0
LINC01226	0	0	0	0.425532	1.21951	0	0.443131	0	0	0	0	0.143885	0.0977517	0.359712	0	0	0	0	1.5873	0	1.76999	0	0	0	0	0.2002	0	0	17.6471	0	0.277393	0	0	0	0	0.328537	0	0
AC114488.1	0	0	0	0	0	0	0	0	0	0	0	0	0	0	0	0	0	0	0	0	0	0	0	0	0	0	0	0	0	0	0	0	0	0	0	0.0113289	0	0
TINAGL1	1.82421	1.06707	1.35135	6.38298	4.87805	26.91	1.18168	85.0746	82.9787	78.7194	54.3298	1.79856	13.001	1.07914	60.8696	13.8889	66.6667	1.19048	5.82011	76.4583	2.3766	25	40	1.44928	0.793651	1.3013	70.2564	2.4	0	15.7895	16.9209	0	46.1538	72	37.2549	14.6936	85.9155	79.4979
HCRTR1	0	0	0	0	0	0	0	0	0	0	0	0	0	0	0	0	0	0	0	0	0.0166196	0	0	0	0	0	0	0	0	0	0	0	0	0	0.490196	0.0566444	0	0
PEF1	12.7695	9.45122	24.3243	15.7447	7.31707	27.7372	19.0547	19.403	55.3191	27.4953	19.0985	11.4388	22.5806	26.6187	29.8137	25	33.3333	15.0794	32.0988	30.8333	36.0146	50	50	5.07246	11.1111	13.6136	13.8462	14.4	11.7647	63.1579	32.7323	37.5	23.0769	40	55.3922	61.0287	15.493	27.8243
AC114488.2	0	0.152439	0	0	0	0.0486618	0	0	2.12766	0	0	0	0	0	0	0	0	0	0.881834	0	0.0332392	0	0	0	0	0	0.512821	0.8	0	0	0	0	0	0	0	0.0226578	0	0
AC114488.3	0.165837	0.152439	0	0	0	0	0	1.49254	2.12766	0.188324	0	0.0719424	0.0977517	0	0	0	0	0	0.881834	0	0.0914077	0	0	0	0.793651	0.1001	0	0	0	0	0	0	0	0	0	0.169933	0	0.627615
COL16A1	0.165837	0.152439	33.7838	25.5319	0	8.71046	1.03397	13.4328	2.12766	0	0.118624	0.143885	2.05279	0	2.48447	2.77778	22.2222	0	22.575	0.833333	0.0914077	0	10	0	0	0	0	0	0	5.26316	2.35784	0	15.3846	8	6.86275	2.88886	7.04225	0.41841
ADGRB2	0	0.457317	1.35135	0	0	0.194647	0.14771	0	0	0	0.118624	0.143885	0.0977517	0	0	0	0	0	7.93651	0	0.0166196	0	0	0	1.5873	0	0	0	0	0	0.554785	0	0	0	0	0.090631	0	0
MIR4254	0	0	0	0	0	0	0	0	0	0	0	0	0	0	0	0	0	0	0	0	0	0	0	0	0	0	0	0	0	0	0	0	0	0	0	0	0	0
AL354919.2	0	0	0	0	0	0	0	0	0	0	0	0	0	0	0	0	0	0	0	0	0.00830979	0	0	0	0	0	0	0	0	0	0	0	0	0	0	0	0	0
SPOCD1	0	0.457317	2.7027	0.851064	1.21951	0.291971	6.49926	0	19.1489	0	0.237248	0.215827	0.0977517	0.719424	1.24224	0	0	0	1.41093	0.208333	34.9759	18.75	0	1.44928	0.793651	0.3003	0.512821	0	0	0	1.52566	0	7.69231	16	1.47059	1.1782	1.40845	0.627615
AL354919.1	0.331675	0	0	0	0	0.0486618	0	0	0	0	0	0.0719424	0.0977517	0	0	0	0	0	0.176367	0	0.0332392	0	0	0	0	0	0	0	0	0	0.138696	0	0	0	0	0.0566444	0	0
AL136115.2	0.497512	1.37195	2.7027	0.425532	1.21951	0.681265	0.295421	0	2.12766	0.188324	0.118624	0.57554	0.977517	1.07914	0.621118	2.77778	0	0.396825	0.529101	0.416667	1.0221	0	0	1.44928	3.1746	0.900901	1.02564	0	0	0	0.970874	0	0	0	0.490196	1.47275	0	0.627615
PTP4A2	68.8226	54.878	55.4054	43.4043	40.2439	68.4185	55.9823	44.7761	76.5957	31.4501	38.4342	86.3309	73.8025	88.4892	43.4783	30.5556	66.6667	82.1429	66.4903	51.0417	87.6683	93.75	90	44.2029	65.873	82.5826	47.1795	66.4	64.7059	73.6842	85.1595	75	76.9231	68	75	94.2789	45.0704	51.2552
AL136115.1	0	0	0	0	0	0	0	0	0	0	0	0	0	0.359712	0	0	0	0	0	0	0.0664783	0	0	0	0.793651	0.1001	0.512821	0	0	0	0.277393	0	0	0	0	0.147275	0	0
AL136115.3	0	0	0	0	0	0.0486618	0	0	0	0	0	0	0	0	0	0	0	0	0	0	0	0	0	0	0	0	0	0	0	0	0	0	0	0	0	0.0226578	0	0
KHDRBS1	42.6202	37.6524	51.3514	46.383	34.1463	68.0292	48.5968	38.806	68.0851	34.8399	44.3654	54.7482	54.9365	68.3453	47.8261	38.8889	77.7778	58.7302	76.8959	56.4583	79.1258	87.5	70	21.7391	44.4444	60.3604	46.6667	40.8	47.0588	68.4211	72.2607	37.5	69.2308	60	52.9412	80.1291	56.338	53.7657
AL445248.1	0.66335	0.304878	0	1.2766	1.21951	2.14112	1.03397	1.49254	2.12766	1.88324	1.06762	0.431655	0.782014	0.719424	0	0	0	0	2.46914	0.833333	0.963936	0	20	0	1.5873	0.500501	0	0	0	0	1.80305	0	7.69231	0	1.47059	1.54073	1.40845	0.83682
TMEM39B	3.9801	2.28659	12.1622	6.38298	2.43902	12.4574	5.613	8.95522	34.0426	4.51977	6.16845	6.69065	6.25611	17.6259	7.45342	2.77778	0	6.74603	10.0529	14.375	13.6364	25	10	0.724638	5.55556	7.20721	7.17949	8	5.88235	0	11.9279	0	0	0	6.86275	19.0665	4.22535	12.3431
MIR5585	0	0	0	0	0	0	0	0	0	0	0	0	0	0	0	0	0	0	0	0	0	0	0	0	0	0	0	0	0	0	0	0	0	0	0	0	0	0
RF00017-1	0	0	0	0	0	0	0	0	0	0	0	0	0	0	0	0	0	0	0	0	0	0	0	0	0	0	0	0	0	0	0	0	0	0	0	0	0	0
KPNA6	13.267	13.7195	24.3243	20	18.2927	28.3698	16.6913	20.8955	51.0638	21.8456	21.7082	17.3381	25.1222	26.9784	22.3602	25	66.6667	13.4921	44.7972	17.9167	38.3331	37.5	20	6.52174	11.9048	20.3203	23.0769	16	41.1765	31.5789	39.9445	25	46.1538	20	48.5294	57.1429	25.3521	23.8494
AL049795.2	0.165837	0	0	0.425532	0	0.340633	0.14771	1.49254	0	0	0	0.0719424	0	0.359712	0	0	0	0	0	0	0.199435	0	0	0	0	0	0	0	0	0	0	0	0	0	0	0.566444	0	0.209205
TXLNA	11.9403	9.14634	18.9189	12.3404	6.09756	26.7153	11.0783	13.4328	51.0638	12.806	14.2349	8.77698	17.0088	11.8705	9.31677	5.55556	33.3333	12.6984	30.8642	19.375	31.278	50	30	1.44928	7.14286	14.9149	19.4872	17.6	41.1765	10.5263	27.6006	37.5	30.7692	32	27.451	41.9622	25.3521	19.8745
CCDC28B	5.3068	2.59146	22.973	3.82979	4.87805	5.54745	5.16987	7.46269	17.0213	1.69492	3.20285	2.15827	3.71457	6.11511	7.45342	8.33333	0	2.38095	8.46561	7.29167	1.91956	31.25	10	0	18.254	2.1021	3.58974	2.4	0	5.26316	5.13176	0	0	4	5.88235	4.237	7.04225	4.81172
AL049795.1	0.165837	0.152439	1.35135	0	0	0.0973236	0.14771	0	0	0.188324	0.118624	0.0719424	0.488759	0	0	0	0	0	1.76367	0	0.108027	0	0	0	0	0	0	0.8	0	0	0.970874	0	0	0	0.490196	0.373853	1.40845	0.209205
IQCC	0.331675	0.304878	2.7027	0	0	1.26521	0.443131	0	4.25532	0.564972	0.474496	0.359712	0.977517	1.07914	0.621118	0	0	0	11.9929	0	0.698022	6.25	0	0	0	0.500501	0.512821	0	0	0	2.91262	0	0	0	2.45098	2.82089	2.8169	0.83682
DCDC2B	0.165837	0.152439	0	0	0	0.583942	0.14771	1.49254	0	0	0.355872	0.0719424	0.0977517	0	0	2.77778	0	0	70.5467	0	0.182815	0	0	0	0.793651	0	0.512821	0	0	0	0.554785	0	0	0	0.490196	0.294551	1.40845	0
TMEM234	2.81924	2.89634	10.8108	5.95745	0	5.69343	5.16987	8.95522	6.38298	3.76648	2.4911	4.10072	3.81232	6.83453	2.48447	2.77778	11.1111	3.57143	31.746	4.79167	12.8469	43.75	0	3.62319	1.5873	3.8038	3.07692	6.4	0	21.0526	10.957	37.5	7.69231	12	10.2941	12.2239	7.04225	4.1841
EIF3I	36.3184	33.5366	66.2162	40.8511	40.2439	59.5134	39.8818	50.7463	89.3617	28.0603	29.656	42.2302	38.2209	69.0647	40.3727	47.2222	33.3333	31.746	57.672	59.5833	74.1649	100	60	15.942	35.7143	39.1391	35.3846	44.8	64.7059	47.3684	67.8225	87.5	69.2308	72	61.7647	82.4516	50.7042	47.4895
MTMR9LP	0.829187	0	6.75676	3.40426	1.21951	3.99027	0.886263	2.98507	10.6383	3.57815	8.8968	0.215827	3.42131	1.07914	12.4224	16.6667	11.1111	0	4.7619	9.79167	2.39322	0	20	0	0.793651	1.3013	3.58974	4.8	0	15.7895	6.10264	12.5	0	0	2.45098	1.56339	4.22535	12.7615
FAM167B	1.16086	0.609756	4.05405	0.851064	1.21951	1.75182	0.295421	2.98507	61.7021	10.5461	19.8102	0.359712	1.27077	0.359712	24.2236	2.77778	11.1111	0	3.1746	33.75	0.473658	6.25	0	0	2.38095	0.3003	2.5641	2.4	0	0	0.832178	0	0	0	1.47059	1.54073	1.40845	47.0711
LCK	64.6766	55.3354	0	1.2766	10.9756	2.18978	1.62482	2.98507	0	0.376648	0.711744	1.8705	2.05279	1.43885	0	0	0	1.5873	2.6455	0.625	0.822669	0	10	0	47.619	2.4024	2.05128	3.2	0	0	3.46741	0	15.3846	0	0.490196	1.34814	2.8169	2.51046
RF00017-2	0	0	0	0	0	0	0	0	0	0	0	0	0	0	0	0	0	0	0	0	0	0	0	0	0	0	0	0	0	0	0	0	0	0	0	0.0113289	0	0
RF00019-13	0	0	0	0	0	0	0	0	0	0	0	0	0	0	0	0	0	0	0	0	0	0	0	0	0	0	0	0	0	0	0	0	0	0	0	0	0	0
HDAC1	23.8806	22.2561	16.2162	11.4894	30.4878	43.163	21.8612	16.4179	70.2128	14.1243	16.3701	20.0719	26.002	32.0144	24.2236	36.1111	33.3333	21.4286	36.1552	31.4583	27.5054	37.5	10	2.17391	18.254	17.4174	32.8205	14.4	11.7647	52.6316	53.2594	37.5	69.2308	20	26.9608	45.1796	28.169	30.3347
MARCKSL1	5.63847	8.53659	27.027	27.6596	40.2439	21.2165	1.4771	5.97015	87.234	25.9887	33.9265	11.7986	18.8661	23.741	40.9938	86.1111	22.2222	10.3175	15.6966	68.3333	3.19096	56.25	20	15.942	6.34921	10.8108	32.3077	12.8	11.7647	52.6316	63.5229	62.5	84.6154	36	3.43137	5.70975	9.85915	63.5983
AL109945.1	0	0	0	0	0	0	0	0	0	0	0	0	0	0	0	0	0	0	0	0	0	0	0	0	0	0	0	0	0	0	0	0	0	0	0	0	0	0
TSSK3	0	0.152439	0	0	0	0.583942	0.295421	1.49254	2.12766	0.376648	0.118624	0.0719424	0.58651	0	0	0	0	0	1.76367	0.416667	0.224364	0	20	0	0	0.1001	1.02564	0	0	0	1.10957	0	0	0	0	0.294551	1.40845	0.627615
FAM229A	1.49254	1.98171	4.05405	2.55319	1.21951	4.9635	0.443131	2.98507	4.25532	1.69492	2.4911	2.30216	3.81232	1.43885	1.24224	5.55556	11.1111	3.1746	4.2328	2.91667	2.10238	6.25	10	2.17391	2.38095	1.3013	2.05128	0.8	0	0	8.32178	0	7.69231	0	6.37255	4.3163	4.22535	2.71967
BSDC1	14.9254	15.5488	20.2703	24.2553	14.6341	27.7372	14.1802	23.8806	27.6596	14.8776	19.6916	11.9424	23.3627	17.2662	21.118	25	33.3333	13.4921	27.3369	12.2917	31.0703	68.75	50	6.52174	15.873	16.3163	25.641	13.6	5.88235	42.1053	39.3897	50	15.3846	4	35.2941	43.4576	36.6197	21.3389
GAPDHP20	0	0	0	0	0	0	0	0	0	0	0	0	0	0	0	0	0	0	0	0	0	0	0	0	0	0	0	0	0	0	0	0	0	0	0	0	0	0
AL356986.1	0	0	0	0	0	0	0	0	0	0	0	0	0	0	0	0	0	0	0	0	0	0	0	0	0	0	0	0	0	0	0	0	0	0	0	0	0	0
LRRC37A12P	0	0	0	0	0	0	0	0	0	0	0	0	0	0	0	0	0	0	0	0	0	0	0	0	0	0	0	0	0	0	0	0	0	0	0	0	0	0
RN7SL122P	0	0	0	0	0	0	0	0	0	0	0	0	0	0	0	0	0	0	0	0	0	0	0	0	0	0	0	0	0	0	0	0	0	0	0	0	0	0
AL033529.1	0	0	0	0	0	0	0	0	0	0	0	0	0	0	0	0	0	0	0	0	0	0	0	0	0	0	0	0	0	0	0	0	0	0	0	0	0	0
ZBTB8B	0	0	0	0	0	0.827251	0	0	0	0	0.948992	0	0.293255	0	0.621118	0	0	0.396825	0.352734	0	0.141266	6.25	0	0	0	0.1001	0	0	0	0	0.277393	0	0	0	0.980392	0.487142	0	0
ZBTB8A	0.497512	0.914634	8.10811	8.93617	3.65854	12.5547	2.06795	8.95522	8.51064	19.9623	26.4531	0.57554	9.77517	3.95683	18.6335	5.55556	44.4444	0	5.99647	16.0417	8.235	18.75	40	0	1.5873	1.1011	7.69231	4.8	0	0	16.9209	12.5	15.3846	8	20.5882	16.8574	5.6338	18.8285
ZBTB8OS	29.5191	17.8354	32.4324	19.5745	23.1707	35.4258	21.7134	26.8657	42.5532	19.9623	20.2847	23.3094	32.3558	34.8921	20.4969	8.33333	33.3333	31.746	42.5044	23.5417	72.586	43.75	30	15.2174	30.9524	30.7307	24.6154	56.8	29.4118	52.6316	46.0472	25	61.5385	24	31.3725	63.7363	19.7183	25.3138
RF00019-14	0	0	0	0	0	0	0	0	0	0	0	0	0.0977517	0	0	0	0	0	0	0	0.0166196	0	0	0	0	0	0	0	0	0	0	0	0	0	0	0	0	0
RBBP4	34.8259	26.2195	25.6757	26.383	25.6098	53.2847	21.418	34.3284	61.7021	30.6968	30.2491	31.1511	47.5073	28.4173	28.5714	13.8889	66.6667	37.3016	51.6755	33.5417	46.8589	50	60	5.07246	42.0635	32.2322	33.8462	47.2	35.2941	47.3684	52.982	62.5	53.8462	32	37.7451	69.8652	29.5775	32.4268
SYNC	7.79436	7.46951	10.8108	12.766	2.43902	19.1727	4.72674	17.9104	6.38298	8.47458	7.94781	3.09353	15.347	3.59712	9.93789	11.1111	22.2222	3.1746	13.5802	7.29167	11.3761	18.75	20	1.44928	8.73016	3.5035	11.7949	16	5.88235	31.5789	13.3148	12.5	7.69231	16	19.6078	27.8577	11.2676	11.5063
AC114489.1	0	0	0	0	0	0.0973236	0	0	0	0	0.118624	0	0	0	0	0	0	0	0	0	0	0	0	0	0	0	0	0	0	0	0	0	0	0	0	0.0339866	0	0.209205
KIAA1522	1.16086	1.06707	4.05405	2.55319	2.43902	41.8005	15.2142	2.98507	27.6596	4.14313	4.27046	2.01439	38.1232	5.39568	3.10559	16.6667	11.1111	2.77778	54.4974	7.29167	5.0939	31.25	0	1.44928	2.38095	3.003	3.58974	4.8	0	31.5789	53.6755	75	61.5385	4	33.3333	51.9769	4.22535	10.0418
YARS	14.262	10.3659	16.2162	8.08511	13.4146	14.2579	13.2939	8.95522	40.4255	5.08475	7.11744	9.20863	16.911	18.3453	8.69565	8.33333	11.1111	9.92063	20.1058	8.75	29.9485	43.75	30	2.89855	15.873	11.8118	10.2564	17.6	35.2941	36.8421	20.3883	62.5	7.69231	36	25.4902	62.2748	2.8169	10.6695
S100PBP	20.5638	12.5	10.8108	10.6383	14.6341	22.1898	10.0443	11.9403	14.8936	13.936	13.7604	10.2158	19.7458	13.6691	11.8012	13.8889	33.3333	9.52381	24.3386	13.5417	14.5837	25	30	6.52174	28.5714	14.9149	12.3077	17.6	17.6471	21.0526	22.8849	12.5	23.0769	12	21.5686	26.4189	16.9014	16.7364
FNDC5	0.165837	0	10.8108	0.851064	0	0.53528	0.14771	0	0	1.31827	0.237248	0.143885	0.293255	0	0.621118	0	0	0	0.352734	0	4.80306	0	10	0	0.793651	0	0.512821	1.6	0	0	0.693481	0	23.0769	0	0	0.781693	0	0
HPCA	0	0	0	0.425532	0	0.486618	0	0	0	0	0	0	0.195503	0	0	0	0	0	0.176367	0	0	0	0	0	0	0	0	0	0	0	0.693481	0	0	0	0	0.0793021	0	0
TMEM54	1.16086	0.914634	20.2703	8.08511	2.43902	35.0852	0.886263	5.97015	42.5532	1.12994	1.54211	0.143885	33.4311	0.359712	9.31677	25	11.1111	1.19048	42.5044	5.83333	1.04703	31.25	40	0.724638	0.793651	0.3003	0	0.8	0	0	59.362	62.5	38.4615	12	45.098	58.9441	1.40845	5.64854
RNF19B	5.97015	3.20122	6.75676	4.25532	2.43902	15.2798	6.94239	5.97015	23.4043	3.9548	5.10083	13.0935	10.4594	25.8993	6.8323	11.1111	0	10.7143	22.7513	6.875	29.6493	31.25	20	32.6087	4.7619	14.9149	4.10256	8	5.88235	5.26316	21.3592	25	7.69231	12	17.6471	24.7083	4.22535	8.99582
AL031602.1	0	0	0	0	0	0.0486618	0	0	0	0	0	0	0	0	0	0	0	0	0	0	0.00830979	0	0	0	0	0	0	0.8	0	0	0.138696	0	0	0	0	0.0679733	0	0
AL355864.1	0	0	0	0	0	0.0486618	0	0	0	0	0	0	0	0	0	0	0	0	0	0	0	0	0	0	0	0	0	0	0	0	0	0	0	0	0	0.0339866	0	0
AL355864.2	0	0	0	0.425532	0	0.0486618	0.14771	0	0	0	0	0	0.0977517	0	0	0	0	0	0	0	0	0	0	0	0	0	0	0	0	0	0	0	0	0	0	0.0566444	0	0
AL020995.1	0.165837	0	0	0.425532	0	0.0973236	0.14771	0	0	0	0	0.0719424	0	0	0	0	0	0	0	0	0.00830979	0	0	0	0	0	0.512821	0	0	0	0.138696	0	0	0	0	0.0793021	0	0
AK2	13.1012	8.68902	31.0811	17.0213	9.7561	41.6058	20.8272	22.3881	68.0851	13.936	15.4211	19.2086	32.4536	30.9353	29.1925	13.8889	22.2222	19.4444	42.6808	35	40.7097	75	50	2.89855	13.4921	19.4194	11.7949	21.6	17.6471	36.8421	57.4202	62.5	46.1538	40	34.3137	68.0526	14.0845	27.6151
RF00017-3	0	0	0	0	0	0	0.14771	0	2.12766	0	0	0	0.0977517	0.359712	0	0	0	0	0.176367	0	0.0332392	0	0	0	0	0	0	0	0	0	0	0	0	0	0	0.20392	0	0
AZIN2	0.995025	1.82927	2.7027	1.2766	0	1.6545	0.295421	1.49254	6.38298	0.94162	0.474496	0.0719424	0.879765	0.719424	1.24224	0	0	0.396825	10.9347	2.08333	0.589995	6.25	10	0	0.793651	0.2002	1.02564	0	17.6471	0	2.08044	0	0	0	0.980392	1.14422	0	1.25523
AL662907.1	0	0	1.35135	0	0	0.194647	0.590842	0	0	0	0.118624	0	0.293255	0.359712	0	0	0	0	0	0	0.0830979	0	0	0	0	0.2002	0	0	0	0	0.416089	0	0	0	0	0.317209	0	0
TRIM62	1.65837	0.762195	1.35135	0.425532	0	2.57908	1.4771	0	2.12766	1.69492	2.01661	1.22302	1.17302	0.719424	1.24224	0	0	1.98413	2.6455	0.625	2.56772	6.25	10	0.724638	1.5873	1.001	1.53846	0	0	10.5263	3.19001	0	23.0769	0	0.980392	2.92285	0	1.46444
AL662907.2	0.331675	0.304878	0	0.425532	0	0.291971	0	0	0	0	0	0	0	0	0	0	0	0	0.529101	0.208333	0.0914077	6.25	0	0	0	0	0.512821	0	0	0	0.277393	0	0	0	0	0.181262	0	0.41841
AL662907.3	0	0	0	0	0	0.194647	0.14771	0	0	0	0.237248	0	0	0	0	0	0	0	1.94004	0.208333	0.0498587	0	0	0	0	0	0	0	0	0	0.138696	0	0	0	0	0.124618	0	0.209205
ZNF362	4.80929	2.13415	6.75676	7.65957	6.09756	17.5669	6.20384	13.4328	17.0213	12.806	7.59193	6.40288	13.4897	7.91367	7.45342	2.77778	44.4444	7.14286	10.0529	6.66667	11.5922	6.25	10	0	3.1746	8.60861	9.74359	2.4	0	10.5263	16.3662	12.5	15.3846	4	12.2549	19.395	12.6761	8.57741
AL513327.3	0	0	0	0	0	0	0	0	0	0	0	0.0719424	0	0	0	0	0	0	0	0	0.0498587	0	0	0	0	0	0	0	0	0	0	0	0	0	0	0.0339866	0	0
A3GALT2	0	0	0	0	0	0	0	0	0	0	0	0	0	0	0	0	0	0	0	0	0	0	0	0	0	0	0	0	0	0	0	0	0	0	0	0.0226578	0	0
AL513327.1	0	0.152439	0	0	0	0.243309	0	0	0	0.753296	0.237248	0.0719424	0	0	0	2.77778	0	0.396825	0.529101	0	0.116337	0	0	0.724638	0	0.2002	1.02564	0	0	0	0.416089	0	0	0	0	0.30588	0	0.209205
PHC2	12.1061	8.9939	33.7838	31.4894	13.4146	32.2141	14.771	29.8507	57.4468	35.9699	29.3001	52.7338	22.4829	39.2086	35.4037	19.4444	44.4444	44.8413	30.5115	30.2083	47.1996	81.25	50	63.0435	8.73016	50.3504	52.3077	10.4	5.88235	31.5789	33.1484	50	53.8462	48	39.2157	61.142	47.8873	30.3347
MIR3605	0	0	0	0	0	0	0	0	0	0	0	0	0	0	0	0	0	0	0	0	0	0	0	0	0	0	0	0	0	0	0	0	0	0	0	0	0	0
RN7SKP16	0.829187	0.609756	1.35135	1.70213	0	1.41119	0.295421	1.49254	2.12766	1.50659	0.948992	1.58273	1.07527	0.719424	1.86335	2.77778	0	1.98413	1.5873	1.25	1.98604	6.25	0	5.7971	0	1.9019	2.5641	0	0	5.26316	2.21914	0	0	0	0.980392	2.51501	2.8169	1.46444
AL513327.2	0	0	0	0	0	0.0486618	0	0	0	0	0	0	0	0	0	0	0	0	0.529101	0	0	0	0	0	0	0	0	0	0	0	0.138696	0	0	0	0	0.158604	0	0
TLR12P	0	0	0	0	0	0	0	0	0	0	0	0	0	0	0	0	0	0	0	0	0	0	0	0	0	0	0	0	0	0	0	0	0	0	0	0	0	0
ZSCAN20	0.165837	0.152439	0	1.2766	0	0.681265	0.443131	1.49254	0	0.564972	0.948992	0.215827	0.391007	0.359712	0.621118	0	0	0	1.76367	0.833333	1.33788	0	0	0	0	0.1001	1.02564	0.8	0	0	1.80305	0	0	0	0.980392	1.04226	0	0.209205
AC115285.1	0.165837	0	0	0	0	0	0	0	0	0	0	0	0	0	0	0	0	0	0	0	0	0	0	0	0	0	0	0	0	0	0	0	0	0	0	0.0339866	0	0
CSMD2	0	0	0	0.425532	0	0.0486618	0	0	0	0	0.118624	0	0.195503	0	0	2.77778	0	0	0.176367	0	0.0332392	0	0	0	0	0.1001	0	0	0	0	0.138696	0	0	0	0	1.23485	0	0
HSPD1P14	0	0	0	0	0	0	0	0	0	0	0	0	0	0	0	0	0	0	0	0	0	0	0	0	0	0	0	0	0	0	0	0	0	0	0	0	0	0
HMGB4	0	0	0	0	0	0	0	0	0	0	0	0	0	0	0	0	0	0	0	0	0	0	0	0	0	0	0	0	0	0	0	0	0	0	0	0	0	0
CSMD2-AS1	0	0	0	0	0	0	0	0	0	0	0	0	0	0	0	0	0	0	0	0	0	0	0	0	0	0	0	0	0	0	0	0	0	0	0	0	0	0
RNA5SP42	0	0	0	0	0	0	0	0	0	0	0	0	0	0	0	0	0	0	0	0	0	0	0	0	0	0	0	0	0	0	0	0	0	0	0	0	0	0
C1orf94	0	0	0	0	0	0	0	0	0	0	0	0	0	0	0	0	0	0	0	0	0	0	0	0	0	0	0	0	0	0	0	0	0	0	0	0	0	0
AC115286.1	0	0	0	0	0	0	0	0	0	0	0	0	0	0	0	0	0	0	0	0	0	0	0	0	0	0	0	0	0	0	0	0	0	0	0	0	0	0
MIR552	0	0	0	0	0	0	0	0	0	0	0	0	0	0	0	0	0	0	0	0	0	0	0	0	0	0	0	0	0	0	0	0	0	0	0	0	0	0
SMIM12	20.5638	15.0915	24.3243	9.78723	14.6341	25.4988	19.2024	38.806	61.7021	20.5273	18.7426	21.0791	17.8886	36.3309	22.9814	11.1111	0	21.4286	28.0423	27.9167	45.7786	62.5	20	2.17391	17.4603	23.1231	24.6154	14.4	17.6471	42.1053	27.1845	37.5	38.4615	52	26.4706	47.8872	30.9859	25.1046
GJB5	0	0	0	0.425532	0	19.562	0	1.49254	0	0.376648	0.118624	0.0719424	2.15054	0	0.621118	0	0	0.793651	6.17284	0	0.0830979	0	0	0	0	0.2002	0	0	0	0	10.957	0	0	0	0.490196	0.260564	1.40845	0
GJB4	0.66335	0	0	0.425532	0	10.1217	0	0	0	0.564972	0.237248	0	0.0977517	0	0	0	0	0.396825	3.88007	0.208333	0.124647	0	0	0	0	0.3003	0.512821	0	0	0	8.18308	0	0	0	0	0.283222	1.40845	0.209205
AL121988.1	0	0	0	0	0	0	0	0	0	0	0	0	0	0	0	0	0	0	0	0	0	0	0	0	0	0	0	0	0	0	0	0	0	0	0	0	0	0
GJB3	0.331675	0.152439	0	0	0	18.7348	0.14771	1.49254	0	0.376648	0.711744	0.215827	2.73705	0	0	0	0	0	2.1164	0	0.0581685	0	0	0.724638	0	0.1001	1.02564	0	0	0	13.1761	0	0	0	0.980392	1.08757	0	0.209205
GJA4	0	0.152439	0	0	1.21951	1.11922	0	59.7015	0	2.07156	11.2693	0.431655	0.879765	0.359712	18.6335	11.1111	11.1111	0	4.58554	0.833333	0.324082	0	10	0.724638	0	0	94.359	0.8	0	0	1.52566	0	0	44	0.490196	0.781693	84.507	4.81172
AL122010.1	0	0	0	0	0	0	0	0	0	0	0	0	0	0	0	0	0	0	0	0	0	0	0	0	0	0	0	0	0	0	0	0	0	0	0	0.0226578	0	0
DLGAP3	0.66335	1.37195	0	0.851064	0	1.36253	0	0	2.12766	0.188324	0.118624	1.72662	0.977517	2.51799	0	2.77778	0	1.19048	1.5873	0.208333	0.282533	0	0	0	0	2.002	0.512821	0.8	5.88235	0	1.80305	0	0	0	0.490196	1.11023	0	0.209205
AC114490.3	2.98507	1.82927	1.35135	4.25532	0	2.38443	0.886263	2.98507	0	2.07156	4.15184	0.863309	2.15054	0.719424	4.34783	2.77778	11.1111	1.98413	1.5873	3.75	1.05534	0	0	0	2.38095	1.5015	3.07692	0	0	0	1.38696	0	0	0	0.490196	1.82395	1.40845	3.13808
AC114490.1	0	0	0	0	0	0	0	0	0	0	0	0	0	0	0	0	0	0	0	0	0	0	0	0	0	0	0	0	0	0	0	0	0	0	0	0	0	0
AC114490.2	0.165837	0.304878	0	0.425532	0	0.729927	0.14771	0	2.12766	0.376648	0.355872	0.143885	0.391007	0	0	0	0	0	0.529101	0.625	0.78112	6.25	0	0	0	0.2002	0.512821	0	0	0	0.832178	0	0	0	0	0.928968	0	0
TMEM35B	0	0	0	0.851064	0	0.0973236	0	0	0	0	0	0	0	0.359712	0.621118	0	0	0	0.352734	0	0.116337	0	0	0	0.793651	0.1001	0	0	0	0	0.138696	0	0	0	0	0.294551	0	0
ZMYM6	4.47761	4.26829	6.75676	5.95745	1.21951	11.5328	6.94239	7.46269	14.8936	5.27307	5.81257	10.1439	9.87292	9.35252	8.69565	5.55556	0	13.0952	11.9929	7.29167	18.1569	6.25	40	2.89855	6.34921	13.4134	5.64103	5.6	5.88235	15.7895	14.7018	0	0	12	8.82353	18.5001	7.04225	5.64854
ZMYM1	5.63847	5.64024	8.10811	10.2128	6.09756	16.691	4.13589	2.98507	12.766	6.21469	9.25267	4.96403	10.6549	4.67626	8.69565	8.33333	33.3333	5.55556	13.7566	11.0417	10.1546	0	10	1.44928	7.93651	7.30731	11.7949	4	0	10.5263	16.6436	25	15.3846	0	9.31373	11.6348	4.22535	10.0418
RPL12P45	0	0	0	0	0	0	0	0	0	0	0	0	0	0	0	0	0	0	0	0	0	0	0	0	0	0	0	0	0	0	0	0	0	0	0	0	0	0
EFCAB14P1	0	0	0	0	0	0	0	0	0	0	0	0	0	0	0	0	0	0	0.176367	0	0.00830979	0	0	0	0	0	0	0	0	0	0.138696	0	0	0	0	0.0453155	0	0
AL590434.1	0	0	0	0	0	1.50852	0	0	0	0	0	0	0	0	0	0	0	0	3.1746	0.208333	0.0332392	0	0	0	0	0	0	0	0	0	1.38696	0	0	0	0	0.0453155	0	0
SFPQ	55.2239	48.9329	71.6216	59.1489	45.122	76.2044	51.4032	61.194	87.234	48.0226	61.3286	63.8849	74.7801	73.741	67.0807	55.5556	88.8889	51.5873	79.5414	60.4167	81.76	100	70	30.4348	64.2857	66.0661	67.1795	50.4	64.7059	94.7368	81.9695	100	76.9231	64	77.451	90.7216	70.4225	68.2008
RF00019-15	0	0	0	0	0	0	0	0	0	0	0	0	0.0977517	0	0	0	0	0	0	0	0	0	0	0	0	0	0	0	0	0	0	0	0	0	0	0.0339866	0	0
ZMYM4	6.6335	5.94512	28.3784	12.3404	6.09756	30.219	8.12408	19.403	38.2979	7.34463	9.60854	12.8777	29.0323	11.1511	12.4224	13.8889	22.2222	13.4921	30.3351	19.7917	22.6608	37.5	50	2.17391	7.93651	13.8138	17.9487	10.4	5.88235	31.5789	38.5576	25	46.1538	12	25	44.7377	5.6338	16.9456
RN7SL503P	0	0	0	0	0	0	0	0	0	0	0	0	0.0977517	0	0	0	0	0	0	0	0	0	0	0	0	0	0	0	0	0	0	0	0	0	0	0.0113289	0	0
RF00091	0	0	0	0	0	0.0486618	0	0	0	0	0	0	0	0	0	0	0	0.396825	0	0	0.0498587	0	0	0	0	0	0	0	0	0	0	0	0	0	0	0.169933	0	0
RPL5P4	3.31675	2.89634	4.05405	3.82979	8.53659	14.3552	5.46529	5.97015	12.766	0.753296	0.948992	3.66906	9.67742	9.35252	3.10559	2.77778	0	3.1746	11.2875	8.33333	8.34303	50	20	0	0.793651	4.3043	2.5641	7.2	5.88235	5.26316	22.8849	25	30.7692	0	6.86275	20.7432	7.04225	5.02092
ZMYM4-AS1	0.165837	0.152439	0	0	0	0.145985	0	0	0	0	0	0	0.0977517	0	0	0	0	0	0	0	0.0415489	0	0	0.724638	0	0	0.512821	0.8	0	0	0	0	0	0	0	0.0453155	0	0
RF00017-4	0	0	0	0	0	0.0486618	0	0	0	0	0	0	0	0	0	0	0	0	0	0	0.00830979	0	0	0	0	0	0	0	0	0	0.138696	0	0	0	0	0.0679733	0	0
KIAA0319L	11.2769	9.14634	17.5676	8.93617	8.53659	27.3966	9.74889	11.9403	36.1702	13.1827	14.7094	20.7914	33.3333	14.7482	19.2547	25	33.3333	17.0635	49.3827	17.7083	27.5885	43.75	20	16.6667	15.0794	14.8148	10.2564	16.8	23.5294	26.3158	51.7337	87.5	53.8462	20	47.549	63.2718	14.0845	22.1757
AC004865.1	0.497512	0.304878	0	0	0	0.291971	0.14771	0	0	0.376648	0.118624	0	0.293255	0	0	0	0	0	0	0.625	0.0747881	0	0	0	0	0.1001	0	0	0	0	0.554785	0	0	0	0	0.169933	0	0.209205
NCDN	2.48756	2.43902	6.75676	2.55319	0	4.81752	1.92024	1.49254	12.766	0.564972	2.37248	2.58993	4.88759	1.07914	1.24224	5.55556	11.1111	2.38095	8.81834	3.95833	3.47349	6.25	10	0	0.793651	1.7017	3.58974	4	0	15.7895	13.5922	12.5	7.69231	0	8.33333	18.9872	2.8169	2.71967
AC004865.2	6.6335	1.82927	0	0.425532	3.65854	0.729927	4.13589	0	0	0.188324	0.118624	4.53237	1.95503	1.43885	0	0	0	5.15873	1.23457	0.208333	6.14924	12.5	0	0	13.4921	3.2032	0.512821	2.4	5.88235	0	1.10957	0	0	0	0.490196	1.14422	0	0.83682
TFAP2E	0.497512	0	0	0.425532	0	0.340633	0.14771	0	0	0	0.118624	0.431655	1.07527	0	0	0	11.1111	0.793651	0.529101	0.208333	1.59548	0	0	0	1.5873	0.3003	0.512821	0	0	0	0.693481	0	0	0	0.490196	1.69933	1.40845	0.209205
PSMB2	33.9967	23.628	44.5946	33.1915	25.6098	53.3333	40.6204	47.7612	80.8511	35.2166	33.6892	39.7842	43.9883	64.7482	49.0683	50	44.4444	43.254	68.254	48.5417	78.22	81.25	60	7.24638	32.5397	45.9459	37.4359	52	58.8235	73.6842	65.8807	50	69.2308	64	67.6471	79.9705	52.1127	48.954
C1orf216	3.48259	2.89634	9.45946	4.68085	3.65854	2.6764	9.01034	7.46269	14.8936	1.88324	1.77936	2.3741	1.46628	6.47482	3.72671	2.77778	0	3.96825	1.41093	5	13.0214	31.25	0	0.724638	5.55556	3.7037	4.10256	1.6	5.88235	0	1.24827	0	0	12	5.39216	5.94766	2.8169	2.92887
CLSPN	4.47761	1.21951	0	0.425532	1.21951	2.09246	0.886263	0	4.25532	0.188324	0.118624	0.863309	0.391007	10.0719	0	0	0	0.793651	0.352734	0.208333	2.43477	0	10	0	7.14286	1.5015	0.512821	2.4	0	0	3.8835	0	0	0	6.37255	10.8531	0	0.83682
AL354864.1	0	0	0	0	0	0	0	0	0	0	0	0	0	0	0	0	0	0	0	0	0	0	0	0	0	0	0	0	0	0	0	0	0	0	0	0	0	0
AGO4	9.12106	6.55488	9.45946	8.08511	1.21951	14.8905	4.57903	4.47761	8.51064	11.1111	12.93	32.3022	16.4223	11.5108	16.1491	8.33333	22.2222	27.381	22.9277	11.25	21.1401	18.75	10	20.2899	9.52381	22.6226	15.3846	8	5.88235	5.26316	18.0305	37.5	23.0769	4	15.6863	22.2273	8.4507	14.4351
AGO1	9.2869	5.4878	12.1622	7.65957	4.87805	17.9562	11.226	11.9403	17.0213	4.51977	5.9312	19.9281	16.52	11.1511	4.96894	8.33333	11.1111	26.1905	22.7513	10.625	21.1817	18.75	10	12.3188	10.3175	20.6206	7.17949	13.6	11.7647	21.0526	20.111	37.5	23.0769	12	18.1373	28.4581	11.2676	12.5523
AL139286.1	0	0	0	0	0	0	0	0	0	0	0	0	0	0	0	0	0	0	0	0	0	0	0	0	0	0	0	0	0	0	0	0	0	0	0	0	0	0
AL139286.2	0.165837	0	0	0	0	0	0.14771	0	0	0	0	0.0719424	0.0977517	0	0	0	0	0	0	0	0.132957	0	0	0	0	0.4004	0	0	0	0	0.277393	0	0	0	0	0.124618	0	0
AGO3	19.0713	18.9024	24.3243	27.234	18.2927	34.8418	20.9749	19.403	38.2979	14.5009	21.7082	19.1367	34.6041	21.9424	24.8447	16.6667	55.5556	21.4286	30.3351	20.8333	39.6128	50	40	8.69565	23.8095	20.8208	23.5897	18.4	17.6471	31.5789	34.6741	37.5	38.4615	28	44.6078	51.6823	12.6761	24.2678
AL138787.2	0	0	0	0	0	0	0	0	0	0	0	0	0	0	0	0	0	0	0	0	0	0	0	0	0	0	0	0	0	0	0	0	0	0	0	0	0	0
AL138787.1	0	0	0	0	0	0.0486618	0.295421	0	0	0.188324	0	0	0.293255	0	0	0	0	0	26.9841	0.208333	0.0249294	0	0	0	0	0	0	0	0	5.26316	0.138696	0	0	0	0	0.124618	0	0.209205
TEKT2	0	0.152439	0	0	0	0.389294	0	0	0	0	0.118624	0	0.488759	0	0	0	0	0	77.7778	0	0.0997175	0	0	0	0.793651	0	0	0	0	5.26316	0.970874	0	0	0	0.980392	0.827008	0	0.41841
ADPRHL2	6.79934	3.96341	18.9189	8.51064	1.21951	17.129	9.8966	11.9403	14.8936	6.40301	8.54093	5.46763	11.0459	23.0216	12.4224	11.1111	22.2222	7.93651	40.0353	6.875	34.1948	56.25	20	1.44928	6.34921	8.50851	12.3077	10.4	17.6471	10.5263	24.9653	37.5	38.4615	12	32.3529	33.93	18.3099	8.99582
COL8A2	0.165837	0.457317	5.40541	4.68085	0	0.924574	3.24963	4.47761	4.25532	0	0.237248	1.58273	0.391007	14.7482	1.86335	0	0	2.38095	1.0582	1.25	27.065	6.25	20	0	0	3.4034	0	3.2	0	5.26316	3.19001	0	0	4	0.490196	1.28016	2.8169	1.04603
TRAPPC3	19.7347	15.3963	28.3784	16.1702	18.2927	36.0584	30.5761	28.3582	53.1915	20.1507	16.4887	23.5252	24.9267	42.0863	20.4969	19.4444	11.1111	21.0317	35.6261	25.4167	67.4256	56.25	50	14.4928	9.52381	26.8268	15.3846	40.8	29.4118	52.6316	47.7115	87.5	46.1538	32	45.098	62.2862	33.8028	28.0335
MAP7D1	18.7396	16.1585	39.1892	15.7447	8.53659	18.2968	14.1802	25.3731	59.5745	21.8456	19.0985	22.3741	23.0694	38.8489	30.4348	16.6667	22.2222	21.4286	14.1093	15.4167	62.4647	31.25	20	34.058	26.1905	25.4254	15.8974	13.6	35.2941	10.5263	22.4688	50	15.3846	28	58.3333	38.8807	32.3944	19.8745
RN7SL131P	0	0	0	0	0	0.0486618	0	0	0	0	0	0	0	0	0	0	0	0	0	0	0	0	0	0	0	0	0	0	0	0	0	0	0	0	0	0.0113289	0	0
THRAP3	45.1078	37.0427	47.2973	38.2979	29.2683	64.0876	44.7563	35.8209	70.2128	30.8851	36.7734	41.223	50.8309	65.1079	41.6149	47.2222	44.4444	45.6349	72.4868	50.2083	68.722	100	80	32.6087	51.5873	46.9469	40	50.4	17.6471	68.4211	68.932	87.5	53.8462	56	56.3725	77.3309	45.0704	46.0251
UBE2V2P4	0.165837	0	0	0	0	0.0486618	0.14771	0	0	0	0	0	0.0977517	0	0	0	0	0	0	0	0.0332392	0	0	0	0	0	0.512821	0	0	0	0.277393	0	0	0	0	0.0453155	0	0
SH3D21	0.497512	0.304878	1.35135	1.2766	0	1.80049	1.4771	1.49254	2.12766	0.94162	0.711744	0.28777	1.46628	2.8777	0.621118	0	0	0	2.29277	1.04167	4.30447	0	10	1.44928	1.5873	1.6016	1.02564	1.6	5.88235	0	4.02219	12.5	0	4	3.92157	7.63566	1.40845	1.25523
EVA1B	12.1061	8.07927	47.2973	26.8085	2.43902	15.4258	12.26	35.8209	70.2128	42.3729	26.3345	14.2446	8.21114	19.0647	33.5404	30.5556	22.2222	13.8889	19.9295	43.3333	26.6994	43.75	30	3.62319	11.1111	18.8188	53.8462	13.6	0	10.5263	19.2788	0	23.0769	52	16.6667	11.1023	49.2958	35.7741
AL591845.1	0.497512	0	1.35135	2.12766	0	2.6764	0.443131	0	0	1.12994	0.830368	0.0719424	1.07527	0.359712	0	0	0	0	1.5873	0.208333	1.25478	6.25	0	0	0.793651	0.600601	2.5641	0	0	0	4.02219	0	0	0	5.88235	6.71802	0	0.41841
STK40	9.45274	6.25	17.5676	8.08511	7.31707	8.07786	9.74889	19.403	17.0213	7.34463	7.23606	13.0935	9.97067	12.5899	7.45342	8.33333	11.1111	12.6984	23.2804	8.125	36.4966	37.5	0	24.6377	7.93651	14.4144	9.23077	10.4	5.88235	10.5263	14.147	37.5	30.7692	16	18.1373	41.8602	5.6338	8.3682
LSM10	25.539	20.122	32.4324	14.4681	31.7073	27.6886	27.6219	23.8806	38.2979	11.6761	10.3203	31.1511	15.6403	44.964	13.6646	13.8889	11.1111	28.5714	17.4603	19.1667	69.6859	81.25	40	14.4928	29.3651	36.7367	12.8205	49.6	41.1765	47.3684	32.5936	50	61.5385	20	23.0392	52.2941	16.9014	17.7824
RNU4-27P	0	0	0	0	0	0	0	0	0	0	0	0	0	0	0	0	0	0	0	0	0	0	0	0	0	0	0	0	0	0	0	0	0	0	0	0	0	0
OSCP1	0.165837	0.304878	4.05405	4.68085	1.21951	5.3528	0.886263	4.47761	4.25532	3.38983	2.01661	0.647482	4.59433	0.359712	0.621118	2.77778	11.1111	0.793651	81.8342	3.125	4.4125	25	10	0	0	0.500501	4.10256	1.6	0	5.26316	8.04438	12.5	15.3846	0	9.31373	22.7937	1.40845	2.71967
SNORA63C	0	0	0	0	0	0	0	0	0	0	0	0	0	0	0	0	0	0	0	0	0	0	0	0	0	0	0	0	0	0	0	0	0	0	0	0	0	0
MRPS15	25.0415	20.8841	39.1892	23.4043	24.3902	45.7908	31.0192	22.3881	74.4681	20.1507	17.2005	28.3453	29.8143	52.518	24.2236	33.3333	33.3333	30.9524	45.679	35.2083	75.7687	68.75	40	4.34783	23.8095	30.2302	22.0513	44	41.1765	57.8947	63.8003	62.5	46.1538	56	49.5098	86.5073	32.3944	30.3347
CSF3R	2.48756	3.35366	5.40541	1.70213	3.65854	5.06083	1.77253	1.49254	10.6383	3.20151	3.08422	48.6331	6.45161	29.8561	2.48447	2.77778	11.1111	33.7302	6.52557	4.375	20.8659	6.25	10	97.8261	4.7619	31.7317	3.58974	7.2	0	5.26316	6.38003	25	7.69231	8	19.6078	81.8398	2.8169	3.9749
FTLP18	0	0	0	0	0	0	0	0	0	0	0	0	0	0	0	0	0	0	0	0	0	0	0	0	0	0	0	0	0	0	0	0	0	0	0	0	0	0
AL596257.1	0	0	0	0	0	0	0	0	0	0	0	0	0	0	0	0	0	0	0	0	0.0166196	0	0	0	0	0	0	0	0	0	0	0	0	0	0	0.0339866	0	0
AC117945.2	0	0	0	0	0	0	0	0	0	0	0	0	0	0	0	0	0	0	0	0	0	0	0	0	0	0	0	0	0	0	0	0	0	0	0	0	0	0
AC117945.1	0	0	0	0	0	0	0	0	0	0	0	0	0	0	0	0	0	0	0	0	0	0	0	0	0	0	0	0	0	0	0	0	0	0	0	0	0	0
GRIK3	0	0	0	0	0	0.291971	0	0	0	0	0	0	0	0	0	0	0	0	0	0.208333	0	0	10	0	0	0	0	0	0	0	0.138696	0	0	0	0	0	0	0.209205
AL031430.1	0	0	0	0	0	0	0	0	0	0	0	0	0	0	0	0	0	0	0	0	0	0	0	0	0	0	0	0	0	0	0	0	0	0	0	0	0	0
MIR4255	0	0	0	0	0	0	0	0	0	0	0	0	0	0	0	0	0	0	0	0	0	0	0	0	0	0	0	0	0	0	0	0	0	0	0	0	0	0
RNU6-636P	0	0	0	0	0	0	0	0	0	0	0	0	0	0	0	0	0	0	0	0	0	0	0	0	0	0	0	0	0	0	0	0	0	0	0	0	0	0
AL353604.1	0	0	0	0	0	0	0	0	0	0	0	0	0	0	0	0	0	0	0	0	0	0	0	0	0	0	0	0	0	0	0	0	0	0	0	0	0	0
RNA5SP43	0	0	0	0	0	0	0	0	0	0	0	0	0	0	0	0	0	0	0	0	0	0	0	0	0	0	0	0	0	0	0	0	0	0	0	0	0	0
RPS29P6	0	0	0	0	0	0	0	0	0	0	0	0	0	0	0	0	0	0	0	0	0	0	0	0	0	0	0	0	0	0	0	0	0	0	0	0	0	0
LINC01137	2.81924	3.20122	10.8108	1.70213	1.21951	5.79075	2.51108	0	6.38298	1.31827	2.60973	0.863309	3.32356	2.51799	3.10559	5.55556	0	0.793651	3.88007	6.66667	5.99136	6.25	0	0	3.96825	1.6016	1.53846	1.6	0	0	8.04438	12.5	7.69231	0	3.43137	6.10626	2.8169	5.64854
ZC3H12A	4.97512	7.31707	20.2703	15.3191	3.65854	10.1217	14.3279	2.98507	34.0426	3.57815	6.99881	5.32374	5.8651	15.8273	13.6646	0	0	1.98413	15.5203	6.66667	31.7849	43.75	0	22.4638	4.7619	3.7037	2.05128	7.2	11.7647	0	22.4688	87.5	0	12	21.0784	45.2929	9.85915	14.0167
MIR6732	0	0	0	0	0	0	0	0	0	0	0	0	0	0	0	0	0	0	0	0	0	0	0	0	0	0	0	0	0	0	0	0	0	0	0	0	0	0
MEAF6	33.3333	25.6098	41.8919	23.8298	23.1707	51.5328	42.6883	29.8507	46.8085	32.2034	27.1649	27.1942	42.2287	41.3669	24.8447	25	44.4444	26.9841	79.8942	35.8333	50.3075	62.5	60	3.62319	34.127	32.1321	34.359	28.8	41.1765	68.4211	57.2816	62.5	61.5385	36	57.3529	65.9907	36.6197	32.8452
MIR5581	0	0	0	0	0	0	0	0	0	0	0	0	0	0	0	0	0	0	0	0	0	0	0	0	0	0	0	0	0	0	0	0	0	0	0	0	0	0
SNIP1	8.95522	4.72561	4.05405	7.65957	6.09756	15.8151	5.46529	14.9254	17.0213	9.98117	11.3879	4.82014	11.5347	7.91367	9.93789	2.77778	11.1111	5.55556	10.0529	10	11.9495	6.25	20	5.7971	11.9048	6.50651	12.3077	10.4	0	10.5263	16.2275	37.5	15.3846	8	17.1569	23.6094	8.4507	12.9707
FTH1P1	0.331675	0.457317	1.35135	0	0	0.194647	0	0	0	0	0	0.143885	0.0977517	0.359712	0	0	0	0	0	0	0.0997175	0	0	0	0.793651	0	0	0	0	0	0	0	0	0	0	0.0793021	0	0
AL034379.1	0.331675	0	1.35135	0.425532	0	0.145985	0	0	2.12766	0.188324	0	0.0719424	0.0977517	0	0	0	0	0	0.176367	0	0.199435	0	0	0	0	0	0	0	0	0	0.277393	0	0	0	0	0.40784	0	0
DNALI1	0	0.304878	2.7027	5.95745	2.43902	6.27737	0.886263	2.98507	2.12766	0.188324	0.711744	0.503597	13.1965	0.719424	0.621118	0	0	0	91.7108	1.45833	2.26026	37.5	10	0.724638	0	0.4004	3.58974	2.4	0	0	10.957	0	0	8	18.1373	34.0546	2.8169	1.46444
GNL2	10.2819	5.94512	35.1351	13.617	4.87805	20.438	13.2939	7.46269	46.8085	7.34463	8.30368	9.71223	13.783	25.5396	14.2857	13.8889	33.3333	11.5079	30.3351	13.125	34.4856	56.25	20	2.89855	7.93651	12.2122	5.64103	22.4	17.6471	21.0526	28.1553	50	23.0769	24	23.5294	46.8789	7.04225	12.1339
AL513220.1	0	0.152439	0	0	0	0	0	0	0	0	0	0	0	0	0	0	0	0	1.0582	0	0	0	0	0	0	0	0	0	0	0	0	0	0	0	0	0.0226578	0	0
RSPO1	0	0	4.05405	4.68085	0	0	0	0	0	0	0	0.0719424	0	0	0	0	0	0	0	0	0	62.5	30	0	0	0	0	0	0	0	0	0	0	4	0	0.0226578	0	0
C1orf109	3.15091	3.96341	12.1622	5.95745	3.65854	9.44039	2.51108	5.97015	25.5319	5.08475	3.44009	1.94245	5.08309	3.59712	4.34783	8.33333	0	1.5873	8.11287	6.04167	6.56473	31.25	30	0.724638	1.5873	3.003	4.61538	8.8	5.88235	5.26316	9.01526	0	15.3846	8	8.82353	13.7646	4.22535	7.53138
CDCA8	3.48259	0.152439	0	0	1.21951	1.45985	0.295421	0	0	0.753296	0.711744	0.143885	0.879765	3.95683	0.621118	0	0	0.396825	1.5873	0.833333	1.19661	0	0	0	4.7619	0.700701	0.512821	1.6	0	0	2.91262	0	7.69231	0	7.35294	3.71587	0	0.83682
EPHA10	0	0	0	0	0	0	0	0	0	0.188324	0	0	0.0977517	0	0	0	0	0	0	0	0.0249294	0	0	0	0	0	0	1.6	0	0	0.416089	0	0	0	1.96078	1.14422	0	0
RF00019-16	0	0	0	0	0	0	0	0	0	0	0	0	0	0	0	0	0	0	0	0	0	0	0	0	0	0	0	0	0	0	0	0	0	0	0	0.0113289	0	0
ACTN4P2	0	0	0	0	0	0	0	0	0	0	0	0	0	0	0	0	0	0	0	0	0	0	0	0	0	0	0	0	0	0	0	0	0	0	0	0	0	0
AL929472.1	0	0	0	0	0	0	0	0	0	0	0	0	0	0	0	0	0	0	0	0	0	0	0	0	0	0	0.512821	0	0	0	0	0	0	0	0	0	0	0
MANEAL	1.49254	0.152439	0	0.851064	0	2.33577	0.443131	0	4.25532	1.12994	0.711744	0.215827	1.36852	0.359712	0	0	0	0	1.41093	1.25	1.81984	0	0	0	0.793651	0.2002	0.512821	4.8	0	5.26316	3.46741	0	0	0	6.37255	12.1106	0	0.41841
AL929472.3	0	0	0	0	0	0.0486618	0	0	0	0.188324	0	0	0	0	0	0	0	0	0	0	0	0	0	0	0	0	0	0	0	0	0	0	0	0	0	0	0	0
YRDC	11.1111	6.70732	9.45946	7.23404	8.53659	13.1387	9.8966	5.97015	48.9362	7.15631	10.3203	5.53957	10.1662	19.0647	11.1801	8.33333	0	5.55556	12.522	13.3333	20.575	43.75	20	10.1449	5.55556	8.00801	10.7692	11.2	17.6471	26.3158	17.4757	62.5	15.3846	16	12.2549	35.4027	12.6761	14.2259
C1orf122	18.0763	17.0732	50	31.4894	10.9756	50.1703	15.0665	38.806	65.9574	12.2411	16.4887	21.3669	30.9873	35.6115	22.9814	27.7778	44.4444	26.1905	32.2751	33.3333	55.767	93.75	80	12.3188	25.3968	30.4304	25.641	45.6	23.5294	89.4737	62.1359	87.5	76.9231	40	46.5686	81.5453	42.2535	26.9874
MTF1	6.46766	5.79268	9.45946	8.51064	1.21951	14.2579	6.79468	8.95522	23.4043	8.85122	9.13405	17.2662	11.0459	11.8705	9.31677	5.55556	22.2222	12.3016	37.5661	7.29167	26.7326	25	0	27.5362	7.14286	13.5135	7.69231	9.6	0	21.0526	20.527	0	0	12	7.84314	22.6804	9.85915	9.62343
AL929472.4	0	0	0	0	0	0	0	0	0	0.188324	0	0	0	0	0	0	0	0	0	0	0	0	0	0	0	0	0	0	0	0	0	0	0	0	0	0	0	0
AL929472.2	0	0	1.35135	0.425532	0	0.0486618	0.14771	0	2.12766	0.188324	0.118624	0.0719424	0.0977517	0.719424	0	0	0	0	0	0	0.141266	0	0	0	0	0.2002	0	0	0	0	0.138696	0	0	0	0.980392	0.169933	0	0
INPP5B	7.29685	3.04878	16.2162	5.53191	7.31707	7.0073	7.97637	7.46269	21.2766	3.9548	4.27046	4.2446	7.33138	23.0216	4.96894	5.55556	44.4444	5.15873	14.4621	6.25	11.8913	18.75	30	0.724638	3.96825	6.00601	8.71795	6.4	17.6471	10.5263	9.01526	0	7.69231	4	15.6863	20.0861	7.04225	8.57741
RF00092	0	0	0	0	0	0	0	0	0	0	0	0	0	0	0	0	0	0	0	0	0	0	0	0	0	0	0	0	0	0	0	0	0	0	0	0	0	0
RNU6-584P	0	0	0	0	0	0	0	0	0	0	0	0	0	0	0	0	0	0	0	0	0	0	0	0	0	0	0	0	0	0	0	0	0	0	0	0	0	0
RF00017-5	0	0	0	0	0	0	0	0	0	0	0	0	0	0	0	0	0	0	0	0	0	0	0	0	0	0	0	0	0	0	0	0	0	0	0	0.0113289	0	0
SF3A3	19.2371	14.939	27.027	17.8723	10.9756	36.1071	21.7134	17.9104	57.4468	14.1243	17.3191	19.7122	22.7761	40.6475	21.118	25	11.1111	20.6349	37.5661	24.5833	47.5486	37.5	50	6.52174	14.2857	23.8238	17.9487	28.8	23.5294	42.1053	36.8932	25	38.4615	32	30.8824	52.5886	16.9014	21.5481
RNU6-510P	0	0	0	0	0	0	0	0	0	0	0	0	0	0	0	0	0	0	0	0	0	0	0	0	0	0	0	0	0	0	0	0	0	0	0	0.0113289	0	0
FHL3	4.47761	1.67683	20.2703	9.78723	3.65854	7.10462	16.5436	13.4328	31.9149	3.9548	5.21945	11.1511	3.61681	18.705	3.10559	41.6667	0	7.53968	2.29277	5.83333	11.5174	37.5	10	10.1449	8.73016	10.8108	9.23077	4.8	0	10.5263	7.07351	25	7.69231	48	4.41176	9.18772	21.1268	2.71967
UTP11	7.9602	5.94512	31.0811	14.8936	8.53659	25.9854	14.3279	17.9104	63.8298	16.9492	14.2349	12.3741	18.1818	21.9424	20.4969	11.1111	55.5556	16.2698	23.4568	27.5	32.94	56.25	30	5.7971	12.6984	16.5165	16.4103	24.8	0	26.3158	30.5132	37.5	38.4615	36	21.0784	59.9184	14.0845	23.8494
POU3F1	1.3267	1.21951	2.7027	0.425532	3.65854	5.30414	0	0	2.12766	0	0.355872	0	0.195503	0.719424	0.621118	0	0	0.793651	0	0.208333	0.0664783	0	0	0	0	0	0	1.6	0	5.26316	0.693481	0	7.69231	4	1.47059	0.645746	1.40845	0.41841
AL139158.2	0	0	0	0	0	1.55718	0.14771	0	0	0	0	0	0.0977517	0	0	0	0	0	0	0.208333	0	0	0	0	0	0	0	0	0	0	0.277393	0	0	0	0	0.0339866	0	0
AL139158.1	0	0	0	0	0	0.0973236	0	0	0	0	0.118624	0	0	0	0	0	0	0	0	0	0	0	0	0	0	0	0	0	0	0	0	0	0	0	0	0.0113289	0	0
MIR3659	0	0	0	0	0	0	0	0	0	0	0	0	0	0	0	0	0	0	0	0	0	0	0	0	0	0	0	0	0	0	0	0	0	0	0	0	0	0
AL139158.3	0	0	0	0	0	0	0	0	0	0	0	0	0	0	0	0	0	0	0	0	0	0	0	0	0	0	0	0	0	0	0	0	0	0	0	0	0	0
LINC01343	0	0	0	0	0	0	0	0	0	0	0	0	0	0	0	0	0	0	0	0	0	0	0	0	0	0	0	0	0	0	0	0	0	0	0	0	0	0
AL513479.1	0	0	0	0	0	0	0	0	0	0	0	0	0	0	0	0	0	0	0	0	0	0	0	0	0	0	0	0	0	0	0	0	0	0	0	0	0	0
RNU6-753P	0	0	0	0	0	0	0	0	0	0	0	0	0	0	0	0	0	0	0	0	0	0	0	0	0	0	0	0	0	0	0	0	0	0	0	0	0	0
LINC01685	0	0	0	0	0	0	0	0	0	0	0	0	0	0	0	0	0	0	0	0	0.00830979	0	0	0	0	0	0	0.8	0	0	0	0	0	0	0	0	0	0
AL354702.1	0	0	0	0	0	0	0	0	0	0	0	0	0	0	0	0	0	0	0	0	0.0249294	0	0	0	0	0	0	0	0	0	0.138696	0	0	0	0	0.0679733	0	0
AL354702.2	0	0	0	0	0	0	0	0	0	0	0	0	0	0	0	0	0	0	0	0	0	0	0	0	0	0	0	0	0	0	0	0	0	0	0	0	0	0
RRAGC	5.63847	5.03049	16.2162	6.38298	10.9756	10.9489	6.35155	4.47761	23.4043	7.15631	10.4389	11.5827	7.82014	14.0288	7.45342	0	0	13.8889	11.8166	10.4167	28.9513	31.25	10	9.42029	5.55556	13.9139	6.66667	5.6	11.7647	36.8421	11.9279	25	15.3846	0	19.6078	27.0987	4.22535	12.7615
AL139260.2	0	0	0	0	0	0	0	0	0	0	0	0	0	0	0	0	0	0	0	0	0	0	0	0	0	0	0	0	0	0	0	0	0	0	0	0	0	0
AL139260.1	0.829187	0.457317	1.35135	2.12766	0	0.632603	0.738552	1.49254	2.12766	0.376648	0.355872	1.15108	0.879765	2.8777	1.24224	0	0	3.1746	2.1164	0.833333	5.3515	0	0	4.34783	0	1.2012	0.512821	0	0	0	1.38696	0	0	0	2.45098	2.10717	0	0.41841
MYCBP	6.96517	5.03049	5.40541	2.97872	4.87805	14.4039	4.87445	5.97015	17.0213	7.15631	6.40569	10.3597	12.0235	16.1871	5.59006	0	11.1111	11.9048	61.7284	8.33333	13.4619	12.5	20	2.89855	7.14286	7.80781	6.15385	15.2	17.6471	10.5263	21.2205	37.5	30.7692	12	18.6275	27.5292	2.8169	8.78661
AL139260.3	0	0.152439	0	0	0	0	0.14771	0	0	0.188324	0.237248	0.0719424	0	0	0	0	0	0	0.176367	0	0.0166196	0	0	0	0	0.2002	0	0	0	0	0.138696	0	0	0	0	0.0679733	0	0.209205
GJA9	0	0	0	0	0	0	0	0	0	0	0	0	0	0	0	0	0	0	0.176367	0	0.00830979	0	0	0	0	0	0	0	0	0	0	0	0	0	0	0	0	0
RHBDL2	0.165837	0	1.35135	0.425532	1.21951	13.09	0	1.49254	0	0.188324	0.474496	0.143885	1.85728	0	1.24224	0	0	0	11.8166	0.208333	0.191125	12.5	0	0	0	0.600601	0	0	0	31.5789	27.7393	25	7.69231	0	4.41176	2.51501	0	1.46444
RNU6-605P	0	0	0	0	0	0	0	0	0	0	0	0	0	0	0	0	0	0	0	0	0	0	0	0	0	0	0	0	0	0	0	0	0	0	0	0	0	0
RF00019-17	0	0	0	0	0	0	0	0	0	0	0	0	0	0	0	0	0	0	0	0	0	0	0	0	0	0	0	0	0	0	0	0	0	0	0	0	0	0
EIF1P2	0	0	0	0	0	0	0	0	0	0	0	0	0	0	0	0	0	0	0	0	0	0	0	0	0	0	0	0	0	0	0	0	0	0	0	0	0	0
AKIRIN1	29.6849	29.2683	21.6216	20	18.2927	29.0998	20.9749	25.3731	42.5532	25.0471	23.1317	22.7338	29.912	43.8849	31.0559	13.8889	11.1111	25	53.4392	19.1667	52.8669	68.75	60	39.1304	23.0159	26.4264	26.1538	27.2	17.6471	57.8947	36.8932	37.5	46.1538	32	47.0588	60.0997	19.7183	30.1255
NDUFS5	64.8425	62.1951	79.7297	67.234	53.6585	92.9927	75.7755	88.0597	95.7447	53.8606	53.8553	73.8849	84.0665	82.0144	60.8696	63.8889	77.7778	77.381	89.9471	74.7917	96.244	100	80	10.8696	46.0317	75.2753	69.7436	74.4	82.3529	84.2105	90.1526	87.5	100	100	86.7647	96.6693	83.0986	73.0126
MACF1	55.2239	38.2622	55.4054	70.2128	35.3659	52.7007	29.3944	53.7313	85.1064	62.7119	65.7177	40.4317	52.5904	49.6403	59.6273	72.2222	88.8889	42.4603	78.4832	66.25	49.3851	68.75	70	20.2899	70.6349	52.4525	48.7179	24.8	11.7647	63.1579	62.2746	75	69.2308	40	69.6078	87.391	52.1127	70.9205
RNU6-608P	0	0	0	0	0	0	0	0	0	0	0	0	0	0	0	0	0	0	0	0	0	0	0	0	0	0	0	0	0	0	0	0	0	0	0	0.0113289	0	0
RNA5SP44	0	0	0	0	0	0	0	0	0	0	0	0	0	0	0	0	0	0	0	0	0	0	0	0	0	0	0	0	0	0	0	0	0	0	0	0.0113289	0	0
AL356055.1	0	0.152439	0	0.851064	0	0	0.14771	0	0	0.188324	0.355872	0	0.293255	0	0	0	0	0	0.176367	0.208333	0.0332392	0	0	0	0.793651	0.2002	0	0	0	0	0.138696	0	0	0	0	0.385182	0	0.41841
AL442071.1	0	0	0	0	0	0.0486618	0	0	0	0	0	0	0	0	0	0	0	0	0.176367	0	0	0	0	0	0	0	0	0	0	0	0	0	0	0	0	0.0339866	0	0
HSPE1P8	0	0	0	0	0	0	0	0	0	0	0	0	0	0	0	0	0	0	0	0	0.0249294	0	0	0	0	0	0	0	0	0	0	0	0	0	0	0.0679733	0	0
BMP8A	0	0.152439	0	1.2766	0	0.875912	0	1.49254	0	0	0	0	1.27077	0.719424	0	0	0	0	0.705467	0	0.116337	0	0	0	0.793651	0.3003	0	3.2	0	0	0.277393	0	0	4	0	0.158604	2.8169	0
OXCT2P1	0	0	0	0	0	0	0	0	0	0	0.118624	0	0	0	0	0	0	0	0	0	0	0	0	0	0	0.1001	0	0	0	0	0	0	0	0	0	0	0	0
PPIEL	0.497512	1.67683	1.35135	2.97872	1.21951	3.74696	1.18168	1.49254	0	0.376648	0.474496	2.66187	3.22581	3.23741	0.621118	0	0	9.12698	5.11464	1.45833	9.07429	0	0	0	1.5873	8.00801	1.02564	0.8	5.88235	0	5.13176	0	0	0	1.47059	5.4152	1.40845	1.67364
PABPC4	19.7347	18.4451	32.4324	26.383	24.3902	52.944	49.1876	38.806	72.3404	10.5461	11.1507	42.3741	41.5445	66.5468	19.8758	22.2222	55.5556	61.5079	38.448	30.8333	77.0234	75	40	3.62319	17.4603	68.3684	13.8462	65.6	11.7647	36.8421	59.0846	62.5	46.1538	72	34.8039	71.8817	35.2113	25.523
PABPC4-AS1	0	0	0	0	0	0	0	0	0	0	0	0.0719424	0	0.359712	0	0	0	0	0	0	0.00830979	0	0	0	0	0	0	0	0	0	0	0	0	0	0	0.0339866	0	0
SNORA55	0	0	0	0	0	0	0	0	0	0	0.118624	0.0719424	0	0	0	0	0	0	0	0	0.0249294	0	0	0	0	0	0	0	0	0	0	0	0	0	0	0.0226578	0	0
HEYL	0	0	2.7027	10.2128	1.21951	0.778589	0.295421	44.7761	0	2.25989	3.32147	0.359712	1.36852	0.359712	0.621118	0	0	0	1.5873	0.416667	0.648164	0	20	0	0	0.600601	42.5641	0.8	0	0	0.832178	0	0	36	0.980392	1.78996	42.2535	1.46444
AL035404.2	0	0	0	0	0	0	0	0	0	0	0	0	0	0	0	0	0	0	0	0	0	0	0	0	0	0	0	0	0	0	0	0	0	0	0	0	0	0
NT5C1A	0	0	0	0	0	0	0	0	0	0	0	0	0.0977517	0	0	0	0	0	0	0.208333	0	0	0	0	0	0	0	0	0	0	0	0	0	0	0	0.0453155	0	0
HPCAL4	0.497512	1.21951	0	0	0	0.0973236	0	0	0	0.376648	1.54211	0.143885	0.0977517	0	0	0	0	0	0	0	0.0249294	0	0	0	1.5873	0	0	0	0	0	0	0	0	0	0	0.362524	0	0
PPIE	19.403	12.8049	28.3784	13.1915	9.7561	32.0681	21.418	29.8507	34.0426	11.8644	10.6762	12.0863	21.5054	25.5396	16.7702	13.8889	33.3333	12.3016	48.3245	24.5833	36.2639	50	40	2.17391	16.6667	15.7157	13.8462	24	23.5294	26.3158	33.4258	25	38.4615	36	27.9412	43.7974	25.3521	17.9916
AL035404.1	0	0	0	0	0	0	0	0	0	0	0	0	0	0	0	0	0	0	0.176367	0	0	0	0	0	0	0	0	0	0	0	0	0	0	0	0	0.0113289	0	0
RNU7-121P	0	0	0	0	0	0	0	0	0	0	0	0	0	0	0	0	0	0	0	0	0	0	0	0	0	0	0	0	0	0	0	0	0	0	0	0	0	0
BMP8B	0.995025	0.609756	2.7027	0.425532	0	0.389294	0.443131	0	0	0.376648	0.355872	0.215827	1.07527	0.359712	0	0	0	0.396825	3.1746	0	0.556756	0	10	0	0.793651	0.700701	2.5641	14.4	0	0	1.52566	0	0	8	4.41176	3.34202	5.6338	0
OXCT2	0	0	1.35135	0	0	0.0486618	0.14771	0	0	0	0	0.0719424	0.0977517	1.07914	0	2.77778	0	0.396825	0.352734	0	0.0415489	0	0	0	0	0.1001	0	3.2	0	0	0	0	0	0	0	0.373853	1.40845	0
AL033527.6	0	0	0	0	0	0	0	0	0	0	0	0	0	0	0	0	0	0	0	0	0	0	0	0	0	0	0	0	0	0	0	0	0	0	0	0.0113289	0	0
AL033527.3	0.165837	0	0	0	0	0	0.14771	0	0	0	0	0.0719424	0	0	0	0	0	0	0.352734	0	0.0415489	0	0	0	0	0	0	0	0	0	0.138696	0	0	0	0	0.113289	0	0
AL033527.1	0	0	0	0	0	0	0	0	0	0	0	0	0	0	0	0	0	0	0	0	0	0	0	0	0	0	0	0	0	0	0	0	0	0	0	0	0	0
AL033527.5	0.497512	0.304878	0	0.851064	1.21951	0.291971	0.295421	0	0	0	0	0.57554	0	0.359712	0	0	0	0.793651	2.82187	0	0.332392	6.25	0	0	0	0.1001	0	2.4	11.7647	0	0.277393	0	0	0	0.980392	0.328537	4.22535	0
AL033527.4	0	0	0	0	0	0.0486618	0	0	0	0	0	0	0	0	0	0	0	0	0	0	0.00830979	0	0	0	0	0	0	0	0	0	0	0	0	0	0	0.0226578	0	0
TRIT1	2.98507	2.59146	5.40541	3.82979	1.21951	12.3601	2.65879	0	10.6383	3.01318	2.72835	4.17266	9.09091	10.4317	3.72671	5.55556	0	3.57143	26.8078	4.58333	5.7753	12.5	0	1.44928	2.38095	4.2042	5.12821	3.2	17.6471	5.26316	14.2857	12.5	15.3846	12	12.2549	15.1127	7.04225	5.23013
RF00019-18	0	0	0	0	0	0.0973236	0	0	0	0	0	0	0	0	0	0	0	0	0	0	0.0166196	0	0	0	0	0.1001	0	0	0	0	0	0	0	0	0	0.10196	0	0
MYCL	0.331675	0.152439	0	0.425532	1.21951	13.236	0.14771	0	0	0.564972	0.355872	5.97122	5.6696	12.2302	0	2.77778	11.1111	3.96825	10.582	0.416667	0.473658	0	0	0	0	3.3033	0.512821	1.6	17.6471	0	18.4466	12.5	0	0	3.92157	5.97032	0	0.41841
AL033527.2	0	0	0	0	0	0.0486618	0	0	0	0	0	0	0	0.359712	0	0	0	0.396825	0	0	0	0	0	0	0	0	0.512821	0	0	0	0	0	0	0	0	0	0	0
RF00019-19	0	0	0	0	0	0	0	0	0	0	0	0	0	0	0	0	0	0	0	0	0	0	0	0	0	0	0	0	0	0	0	0	0	0	0	0.0113289	0	0
MFSD2A	2.15589	3.04878	6.75676	2.55319	2.43902	7.10462	1.77253	1.49254	12.766	2.07156	2.25386	3.38129	7.62463	6.47482	2.48447	0	0	3.96825	16.0494	3.95833	9.63105	50	30	5.07246	0.793651	3.1031	1.53846	8	0	10.5263	9.84743	37.5	23.0769	4	24.0196	93.6332	5.6338	2.09205
AL663070.1	0	0	0	0	0	0.0486618	0	0	0	0	0	0	0.0977517	0.719424	0	0	0	0	0.176367	0	0.349011	0	0	0	0	0	0	0.8	0	0	0.277393	0	0	0	0.980392	8.79121	0	0
CAP1	65.5058	52.1341	54.0541	35.3191	46.3415	51.9708	66.9129	67.1642	82.9787	65.725	59.5492	87.9137	40.958	96.0432	59.0062	50	77.7778	82.9365	53.4392	55	95.9033	81.25	50	94.9275	71.4286	87.2873	73.3333	44.8	94.1176	84.2105	68.7933	62.5	76.9231	72	71.0784	77.9653	67.6056	67.9916
PPT1	15.9204	15.8537	24.3243	28.5106	19.5122	34.0146	36.3368	28.3582	53.1915	23.3522	23.7248	66.1151	29.7165	85.6115	21.7391	16.6667	11.1111	65.4762	34.0388	35.625	90.0698	62.5	40	44.9275	21.4286	70.0701	24.1026	22.4	11.7647	21.0526	34.8128	12.5	53.8462	36	43.1373	54.9564	33.8028	33.0544
AL512599.1	0	0	0	0	1.21951	0	0	0	0	0	0	0	0	0	0	0	0	0	0.176367	0	0.0581685	0	0	0	0	0.1001	0	0	0	0	0	12.5	0	0	0	0.0566444	0	0
RLF	10.1161	10.8232	17.5676	14.8936	13.4146	18.7348	9.74889	11.9403	21.2766	10.3578	13.9976	9.85612	17.7908	21.9424	11.8012	13.8889	22.2222	9.52381	23.8095	9.375	18.2982	31.25	40	15.2174	15.0794	12.9129	20	7.2	29.4118	21.0526	21.3592	25	7.69231	28	16.1765	29.3078	15.493	12.3431
RNU6-1237P	0	0	0	0.425532	0	0.0973236	0	0	0	0	0	0.0719424	0	0	0	0	0	0	0.176367	0	0.108027	0	0	0.724638	0	0	0	0	0	0	0.277393	0	0	0	0	0.294551	0	0.209205
TMCO2	0	0	0	0	0	0.0486618	0	0	0	0	0	0	0	0	0	0	0	0	0	0	0.332392	0	0	0	0	0	0	0	0	0	0.138696	0	0	0	0	0.0339866	0	0
AL050341.2	2.6534	1.98171	4.05405	4.68085	1.21951	6.42336	1.77253	2.98507	2.12766	3.76648	3.91459	2.51799	8.11339	2.51799	2.48447	0	11.1111	3.57143	13.7566	5.41667	2.19378	6.25	20	0.724638	3.1746	2.002	3.07692	0.8	0	5.26316	12.6214	25	7.69231	0	6.37255	9.26702	7.04225	4.60251
ZMPSTE24	10.1161	7.0122	16.2162	11.9149	3.65854	21.8978	10.6352	16.4179	55.3191	12.806	11.5065	14.2446	17.5953	14.3885	18.6335	13.8889	22.2222	19.8413	39.8589	18.125	41.5905	31.25	20	10.8696	11.1111	18.6186	12.8205	17.6	5.88235	36.8421	36.1997	50	46.1538	28	26.9608	51.1839	15.493	18.2008
AL050341.1	0.331675	0	0	0	0	0.0973236	0	0	0	0	0	0	0.0977517	0	0	0	0	0	0.176367	0	0.00830979	0	0	0	0	0	0	0	0	0	0.277393	0	0	0	0	0.10196	0	0.209205
COL9A2	1.3267	0.609756	1.35135	2.55319	3.65854	5.69343	10.0443	1.49254	0	0.188324	0.118624	1.00719	5.18084	20.1439	0.621118	2.77778	0	1.19048	12.522	0.208333	8.34303	6.25	0	6.52174	0.793651	1.5015	0.512821	4.8	0	5.26316	11.5118	0	30.7692	0	0	1.31415	0	0
AL031985.2	0	0	0	0	1.21951	0.0486618	0.14771	0	0	0	0	0	0.0977517	0	0	0	0	0	0.176367	0	0.0498587	0	0	0	0	0	0	0	0	0	0	0	0	0	0	0.158604	0	0
SMAP2	66.0033	69.0549	8.10811	9.78723	65.8537	22.5304	25.997	13.4328	10.6383	8.47458	7.82918	85.2518	19.0616	85.2518	9.31677	8.33333	11.1111	84.127	59.4356	8.54167	59.7058	25	10	90.5797	70.6349	84.3844	14.359	79.2	29.4118	15.7895	42.9958	62.5	23.0769	20	16.6667	39.8323	16.9014	11.5063
AL031985.1	0	0.152439	0	0	2.43902	0.194647	0	0	0	0	0	1.94245	0	0	0	0	0	1.98413	0.176367	0.208333	1.08858	0	0	0.724638	0.793651	4.9049	0	1.6	0	0	0.277393	0	0	0	0	0.10196	2.8169	0
AL031985.4	0	0	0	0	0	0	0	0	0	0	0	0	0	0	0	0	0	0	0	0	0	0	0	0	0	0	0	0	0	0	0	0	0	0	0	0.0113289	0	0
ZFP69B	0.66335	1.06707	0	0.425532	0	0.875912	0.886263	0	10.6383	0.188324	0	0.215827	0.195503	1.79856	0	0	11.1111	0.793651	1.76367	0.208333	1.38773	0	0	0	0.793651	1.1011	1.02564	0.8	0	0	1.38696	0	0	4	0	1.35947	0	0
AL031985.3	0.165837	0	0	0	0	0.389294	0.14771	0	2.12766	0	0	0.215827	0.195503	0	0	0	0	0.396825	0.352734	0	0.581685	0	0	0	0	0.1001	0.512821	4	0	0	0.693481	0	0	0	0.490196	0.577773	0	0.209205
AL603839.4	0	0	0	0	0	0	0	0	0	0	0	0.0719424	0	0	0	0	0	0	0	0	0.00830979	0	0	0	0	0	0	0	0	0	0	0	0	0	0	0.0793021	0	0
ZFP69	0.829187	0.152439	4.05405	0	0	1.75182	1.18168	1.49254	4.25532	0.753296	0.711744	1.00719	0.782014	2.51799	1.86335	0	0	2.38095	1.5873	2.70833	3.38208	0	20	0	0.793651	1.9019	0	0.8	0	0	1.38696	0	0	0	1.96078	1.63136	5.6338	1.04603
AL603839.3	0.66335	0.304878	0	0.425532	1.21951	0.583942	0.14771	0	0	0	0.118624	0	0.391007	0	0	0	0	0.396825	0.176367	0	0.224364	0	0	0	0.793651	0	0.512821	0	0	0	1.52566	0	0	0	0	0.849666	0	0.41841
EXO5	2.48756	1.82927	1.35135	2.55319	0	3.64964	1.92024	1.49254	4.25532	2.82486	1.66074	1.94245	2.44379	2.51799	3.10559	2.77778	0	2.38095	4.05644	2.5	8.30979	6.25	10	0.724638	4.7619	2.8028	0.512821	0.8	0	10.5263	4.99307	0	7.69231	0	4.90196	5.30191	0	2.92887
AL603839.1	0	0	0	0	0	0.0486618	0	0	0	0	0	0	0	0	0	0	0	0	0	0	0	0	0	0	0	0	0	0	0	0	0	0	0	0	0	0	0	0
AL603839.2	0	0	0	0	0	0.0486618	0	0	0	0	0	0	0	0	0	0	0	0	0	0	0.00830979	0	0	0	0	0	0	0	0	0	0	0	0	0	0	0.0226578	0	0
ZNF684	2.6534	1.21951	2.7027	1.70213	3.65854	5.49878	1.77253	0	8.51064	3.01318	4.50771	2.94964	2.54154	1.79856	1.86335	0	11.1111	3.1746	4.2328	5	7.08825	12.5	20	0	1.5873	3.6036	3.58974	2.4	5.88235	5.26316	5.82524	0	0	4	4.41176	4.13504	1.40845	4.1841
AL356379.1	0	0	0	0	0	0	0	0	0	0	0	0	0	0	0	0	0	0	0	0	0	0	0	0	0	0	0	0	0	0	0	0	0	0	0	0	0	0
GTF2F2P2	0	0	0	0	0	0	0	0	0	0	0	0	0	0	0	0	0	0	0	0	0	0	0	0	0	0	0	0	0	0	0	0	0	0	0	0	0	0
RIMS3	0.829187	0.914634	0	0.425532	0	0.291971	1.03397	13.4328	0	0.188324	0.237248	0.215827	0.684262	2.8777	0	0	0	0.793651	0.176367	0	0.440419	0	0	0	0	0.4004	17.4359	0	5.88235	0	0.832178	0	0	4	2.45098	0.611759	9.85915	0.209205
AL031289.1	0	0	0	0	0	0	0	0	0	0	0	0	0	0	0	0	0	0	0.176367	0	0	0	0	0	0	0	0	0	0	0	0	0	0	0	0	0	0	0
NFYC-AS1	2.15589	1.37195	0	0	3.65854	2.96837	1.62482	2.98507	0	1.31827	0.59312	0.719424	0.977517	2.51799	0.621118	0	0	1.5873	1.0582	0.625	2.6342	0	0	0	0.793651	0.600601	0.512821	1.6	0	0	1.66436	12.5	0	4	0.490196	2.15249	2.8169	0.209205
NFYC	10.2819	10.3659	6.75676	9.3617	7.31707	25.8394	15.5096	20.8955	29.7872	19.209	16.4887	19.8561	17.4976	25.5396	18.0124	8.33333	11.1111	22.619	18.6949	16.4583	34.6186	50	40	12.3188	14.2857	20.9209	20	14.4	11.7647	36.8421	31.9001	50	15.3846	24	22.549	37.1927	14.0845	17.1548
MIR30E	0	0	0	0	0	0	0	0	0	0	0	0	0	0	0	0	0	0	0	0	0	0	0	0	0	0	0	0	0	0	0	0	0	0	0	0	0	0
MIR30C1	0	0	0	0	0	0	0	0	0	0	0	0	0	0	0	0	0	0	0	0	0	0	0	0	0	0	0	0	0	0	0	0	0	0	0	0	0	0
KCNQ4	0.165837	0.152439	0	0.851064	0	0.243309	0	5.97015	0	0	0	0.143885	0	0	0	0	0	0	0.176367	0	0.0747881	0	0	0	0	0	10.2564	0	0	0	0.693481	0	15.3846	4	0	0.396511	4.22535	0
RN7SL326P	0	0	0	0	0	0.0486618	0	0	0	0	0	0.0719424	0	0	0	0	0	0	0	0	0.0249294	0	0	0	0	0	0	0	0	0	0	0	0	0	0	0.0453155	0	0
CITED4	7.13101	9.60366	12.1622	10.2128	1.21951	26.472	1.62482	34.3284	29.7872	14.6893	12.8114	12.8777	9.28641	7.19424	23.6025	36.1111	22.2222	7.53968	49.7354	7.91667	8.4012	56.25	20	1.44928	3.96825	6.00601	28.2051	6.4	0	52.6316	41.1928	50	61.5385	20	22.0588	19.0212	47.8873	21.9665
AC119677.1	0	0	0	0	0	0	0	0	0	0	0	0	0	0	0	0	0	0	0	0	0	0	0	0	0	0	0	0	0	0	0	0	0	0	0	0	0	0
AL391730.1	0	0	0	0	0	0	0	0	0	0	0	0	0	0	0	0	0	0	0	0	0	0	0	0	0	0	0	0	0	0	0	0	0	0	0	0	0	0
UBE2V1P8	0	0	0	0	0	0	0	0	0	0	0	0	0	0	0	0	0	0	0	0	0	0	0	0	0	0	0	0	0	0	0	0	0	0	0	0	0	0
CTPS1	7.29685	5.18293	17.5676	5.10638	4.87805	6.56934	1.03397	22.3881	31.9149	1.12994	3.08422	2.73381	3.91007	16.5468	6.21118	8.33333	0	5.15873	4.40917	2.5	7.76965	31.25	30	0.724638	11.9048	5.20521	5.64103	6.4	11.7647	21.0526	12.0666	12.5	15.3846	32	7.84314	35.5274	8.4507	3.76569
SLFNL1-AS1	0.165837	0.304878	0	0	0	0.340633	0.14771	0	0	0	0	0.0719424	0.391007	0	0	0	11.1111	0	0.705467	0.208333	0.116337	6.25	0	0	0	0.1001	0	0.8	0	5.26316	0.693481	0	0	0	0.490196	1.12156	0	0
SLFNL1	0	0	0	0	0	0.243309	0	0	0	0	0.118624	0	2.34604	0	0	0	0	0	0.176367	0	0.0830979	0	0	0	0	0	0	0.8	0	0	0.554785	0	0	0	4.90196	4.5882	0	0
SCMH1	2.98507	3.5061	8.10811	5.10638	2.43902	11.8735	2.8065	7.46269	12.766	4.14313	4.03321	1.58273	11.1437	3.95683	4.34783	2.77778	0	0	12.1693	3.75	5.3515	18.75	30	0	2.38095	2.002	6.15385	3.2	11.7647	10.5263	15.534	50	15.3846	12	14.2157	22.9296	7.04225	6.69456
RPL23AP17	0	0	0	0	0	0	0	0	0	0	0	0	0	0	0	0	0	0	0	0	0	0	0	0	0	0	0	0	0	0	0	0	0	0	0	0	0	0
AC093151.3	0.165837	0	0	0	0	0.0973236	0	0	0	0	0	0	0	0	0	0	0	0	0.176367	0	0.199435	0	0	0	0	0	0	0	0	0	0.277393	0	0	0	0	0.0113289	0	0
AC093151.1	0	0	0	0	0	0	0	0	0	0	0	0	0	0	0	0	0	0	0	0	0	0	0	0	0	0	0	0	0	0	0	0	0	0	0	0	0	0
FOXO6	0.331675	0	2.7027	0.851064	0	2.57908	0.14771	1.49254	0	1.50659	1.06762	0.143885	0.58651	0.359712	0	0	0	0.396825	1.94004	0	0.299152	12.5	0	0	0	0	0.512821	0	0	0	2.77393	25	0	0	1.96078	0.928968	1.40845	0.41841
AC093151.2	0	0	0	0	0	0.243309	0	0	0	0.188324	0.237248	0	0.195503	0	0	0	0	0	0.529101	0	0.0498587	0	0	0	0	0	0	0	0	5.26316	0.138696	0	0	0	0	0.249235	0	0
RNA5SP45	0	0	0	0	0	0	0	0	0	0	0	0	0	0	0	0	0	0	0	0	0	0	0	0	0	0	0	0	0	0	0	0	0	0	0	0	0	0
EDN2	0	0	0	0.851064	3.65854	3.79562	0.14771	5.97015	0	31.0734	6.28707	0.359712	2.73705	0	4.34783	0	11.1111	0	1.76367	0.833333	0.39887	0	0	0	0	0.1001	0.512821	0	0	0	4.85437	0	0	0	2.45098	2.26578	0	2.71967
HIVEP3	6.79934	4.11585	8.10811	9.78723	4.87805	8.85645	0.886263	5.97015	12.766	7.15631	6.40569	3.45324	5.37634	12.5899	4.96894	11.1111	11.1111	2.77778	4.05644	3.33333	6.07446	37.5	30	1.44928	11.9048	7.40741	14.359	1.6	0	5.26316	8.87656	25	0	28	6.86275	19.0552	5.6338	4.81172
AL445933.2	0	0	0	0	0	0	0	0	0	0	0	0	0	0	0	0	0	0	0	0	0	0	0	0	0	0	0	0	0	0	0	0	0	0	0	0	0	0
AL445933.1	0	0	0	0	0	0.0486618	0	0	0	0	0	0	0	0	0	0	0	0	0	0	0.00830979	0	0	0	0	0	0	0	0	0	0	0	0	0	0	0.0339866	0	0
AC119676.1	0	0	0	0	0	0	0	0	0	0	0	0	0	0	0	0	0	0	0	0	0	0	0	0	0	0	0	0	0	0	0	0	0	0	0	0	0	0
HNRNPFP1	0	0	0	0	0	0	0	0	0	0	0	0	0	0	0	0	0	0	0	0	0	0	0	0	0	0	0	0	0	0	0	0	0	0	0	0	0	0
AC114492.1	0	0	0	0	0	0	0	0	0	0	0	0	0	0	0	0	0	0	0	0	0	0	0	0	0	0	0	0	0	0	0	0	0	0	0	0	0	0
GUCA2B	0	0	0	0	0	0	0	0	0	0	0	0	0	0	0	0	0	0	0	0	0.0498587	0	0	0	0	0.1001	0	0	0	0	0	0	0	0	0	0.0226578	0	0.209205
GUCA2A	0	0	0	0	0	0	0	0	0	0	0	0	0.195503	0	0	0	0	0	0	0	0	0	0	0	0	0	0	0	0	0	0	0	0	0	0.490196	0.0793021	0	0
FOXJ3	15.4229	16.1585	13.5135	11.4894	8.53659	25.2068	9.15805	8.95522	40.4255	13.371	14.3535	11.295	19.9413	12.5899	19.2547	22.2222	11.1111	8.33333	20.1058	18.3333	21.1318	25	40	5.7971	23.8095	14.3143	19.4872	14.4	11.7647	36.8421	27.0458	37.5	30.7692	20	22.549	39.2546	12.6761	19.0377
AC096540.1	0	0	0	0	0	0.0486618	0	0	0	0	0	0	0	0	0	0	0	0	0	0	0	0	0	0	0	0	0	0	0	0	0	0	0	0	0	0.0339866	0	0
RIMKLA	0.497512	0.457317	0	0	0	2.48175	0.443131	0	4.25532	1.88324	0	0.143885	3.91007	0	0	0	0	0.396825	3.7037	1.04167	0.249294	0	0	1.44928	0	0	2.05128	3.2	0	15.7895	4.16089	0	0	0	24.5098	15.3733	0	1.25523
AL513331.1	0	0	0	0	0	0.0486618	0	0	0	0	0	0	0.0977517	0	0	0	0	0	0.705467	0	0.00830979	0	0	0	0	0	0	0	0	0	0.277393	0	0	0	0	0.0566444	0	0
ZMYND12	0	0.152439	0	0.425532	2.43902	0.827251	0.886263	0	0	0.753296	0	0.0719424	2.24829	0.359712	1.24224	0	0	0	33.157	1.25	2.0359	12.5	0	0	0	0.4004	0	0	0	5.26316	1.66436	0	0	0	3.43137	3.54594	1.40845	0.627615
PPCS	28.0265	25	35.1351	22.5532	21.9512	57.6642	34.1211	28.3582	55.3191	17.1375	18.2681	35.3957	48.5826	44.6043	29.8137	22.2222	22.2222	36.9048	43.2099	51.25	72.8852	81.25	70	10.1449	23.0159	40.4404	21.0256	38.4	35.2941	78.9474	64.7712	75	69.2308	32	53.9216	77.5235	30.9859	38.0753
CCDC30	0.66335	2.13415	4.05405	2.97872	0	3.6983	4.87445	2.98507	2.12766	2.63653	1.42349	0.791367	6.94037	2.15827	0.621118	2.77778	0	0.396825	79.7178	2.29167	2.53449	0	0	2.89855	0.793651	1.2012	4.10256	1.6	5.88235	5.26316	6.38003	0	0	0	6.37255	9.36898	2.8169	2.92887
AL445669.1	0	0	0	0	0	0.0486618	0	0	0	0	0	0	0	0	0	0	0	0	4.05644	0	0.00830979	0	0	0	0	0	0	0	0	0	0	0	0	0	0	0.147275	0	0
TMSB4XP1	0	0	0	0	0	0	0	0	0	0	0	0	0	0	0	0	0	0	0	0	0.00830979	0	0	0	0	0.1001	0	0	0	0	0	0	0	0	0	0.0339866	0	0
RNU6-536P	0	0	0	0	0	0	0	0	0	0	0	0	0	0	0	0	0	0	0.352734	0	0	0	0	0	0	0	0	0	0	0	0	0	0	0	0	0.0453155	0	0
AL445669.2	0	0.152439	0	0	0	0.243309	0	1.49254	0	0	0.118624	0.0719424	0.293255	0	0	0	0	0	9.87654	0.208333	0.132957	0	0	0	0	0.2002	0	0	0	0	0.138696	0	0	0	0.490196	0.294551	1.40845	0.627615
PPIH	13.267	10.9756	21.6216	9.78723	14.6341	34.8905	16.1004	10.4478	36.1702	14.1243	9.96441	9.20863	20.1369	26.9784	13.0435	8.33333	11.1111	11.5079	27.5132	21.0417	27.4888	43.75	30	0.724638	16.6667	12.3123	11.7949	16.8	0	26.3158	33.1484	25	46.1538	28	34.3137	33.2276	12.6761	19.8745
AC098484.4	0	0.152439	0	0	0	0.340633	0.14771	1.49254	0	0	0.118624	0.143885	0.0977517	0	0	0	0	0	0.176367	0	0.0914077	0	0	0	0	0	0	0.8	0	0	0.277393	0	0	0	0	0.464484	0	0
AC098484.2	0	0	0	0.425532	0	0.437956	0	0	0	0	0.118624	0.0719424	0.0977517	0	0	0	0	0	0.529101	0	0.0914077	0	0	0	0	0	0	0	0	0	0.416089	0	0	0	0.490196	0.169933	0	0.41841
YBX1	79.2703	80.1829	91.8919	74.8936	87.8049	95.5231	92.1713	94.0299	100	67.0433	69.0391	93.3094	83.2845	100	77.0186	94.4444	88.8889	98.4127	84.3034	94.7917	99.2272	100	90	25.3623	79.3651	96.6967	73.3333	84	88.2353	100	94.3135	100	92.3077	100	83.8235	97.5983	83.0986	89.5397
CLDN19	0	0	0	0	0	0.583942	0	0	0	0	0	0	0.0977517	0	0	0	0	0	0.176367	0	0	0	0	0	0	0	0	0	0	0	0	0	0	0	0.490196	0.0453155	0	0
P3H1	4.14594	3.35366	13.5135	8.93617	0	5.83942	5.31758	5.97015	21.2766	4.51977	4.98221	4.53237	3.12805	10.7914	9.31677	8.33333	11.1111	4.36508	3.35097	7.5	12.8303	25	20	0	7.93651	5.70571	6.15385	3.2	5.88235	5.26316	7.3509	0	15.3846	8	2.45098	8.25875	8.4507	8.159
C1orf50	1.49254	1.67683	0	0.851064	0	2.87105	1.03397	2.98507	0	1.88324	1.06762	1.36691	2.24829	2.15827	0	5.55556	0	0.396825	2.82187	0.833333	3.24082	6.25	0	0.724638	2.38095	1.7017	2.05128	1.6	0	0	2.35784	0	7.69231	4	2.94118	3.91979	0	1.88285
AC098484.3	0.165837	0	0	0	0	0.0486618	0	0	0	0	0	0	0	0.359712	0	0	0	0	0	0	0.0166196	0	0	0	0	0	0	0	0	0	0	0	0	0	0	0.0566444	0	0
AC098484.1	0	0	0	0	0	0	0	0	0	0	0	0	0.0977517	0	0	0	0	0	0	0	0	0	0	0	0	0	0	0	0	0	0	0	0	0	0	0.0113289	0	0
TMEM269	0	0.152439	0	0	0	0	0	0	0	0	0.118624	0.0719424	0.293255	0.359712	0	0	0	0.396825	0.176367	0	0.0581685	0	0	0	0	0.1001	0	0	0	0	0.277393	0	0	0	0.490196	0.260564	0	0
SVBP	14.0962	11.7378	24.3243	17.4468	8.53659	32.4574	16.5436	20.8955	34.0426	16.1959	11.032	24.3165	22.8739	44.2446	16.1491	33.3333	22.2222	24.2063	38.6243	26.25	42.1556	43.75	50	9.42029	13.4921	25.7257	25.1282	12	17.6471	15.7895	32.871	25	23.0769	16	20.098	30.4407	16.9014	17.5732
ERMAP	1.3267	1.06707	2.7027	2.97872	0	11.4355	3.54505	4.47761	4.25532	1.69492	1.30486	7.48201	5.18084	7.19424	2.48447	5.55556	0	5.15873	8.28924	3.125	10.246	6.25	0	1.44928	1.5873	7.60761	1.53846	4	0	0	11.2344	0	0	0	7.84314	9.35765	2.8169	3.13808
AL512353.1	0.165837	0	0	0.425532	1.21951	0.583942	0.14771	0	4.25532	0	0.59312	0.0719424	0.195503	0.359712	0	0	0	0	0.529101	0.208333	1.73675	0	0	0	0	0.2002	0	0	0	0	0.416089	0	0	0	0	1.40478	0	0.209205
ZNF691	1.3267	0.609756	1.35135	3.40426	0	4.76886	2.06795	2.98507	6.38298	2.25989	2.01661	0.647482	2.15054	3.59712	3.72671	5.55556	0	1.5873	4.7619	2.91667	6.85558	0	10	0	2.38095	1.4014	1.53846	1.6	5.88235	15.7895	4.71567	0	0	4	4.41176	6.74068	1.40845	2.30126
AL512353.2	0	0	0	0	0	0	0	0	0	0	0	0	0	0	0	0	0	0	0	0	0.0581685	0	0	0	0	0	0	0	0	0	0	0	0	0	0	0	0	0
AL512353.3	0	0	0	0	0	0.0486618	0	0	0	0	0	0	0	0	0	0	0	0	0	0	0	0	0	0	0	0	0	0	0	0	0	0	0	0	0	0.0113289	0	0
ATP6V1E1P1	0	0	0	0	0	0	0	0	0	0	0	0	0	0	0	0	0	0	0	0	0	0	0	0	0	0	0	0	0	0	0	0	0	0	0	0	0	0
SLC2A1	7.79436	3.35366	6.75676	4.68085	0	18.2482	1.62482	5.97015	10.6383	7.15631	2.84698	0.431655	2.24829	12.5899	8.07453	0	11.1111	0.396825	32.8042	3.54167	1.1883	6.25	10	7.24638	8.73016	0.800801	8.71795	5.6	64.7059	0	25.9362	12.5	23.0769	8	3.43137	4.53155	0	2.30126
ATP6V0CP4	0	0	0	0	0	0	0	0	0	0	0	0	0	0	0	0	0	0	0	0	0	0	0	0	0	0	0	0	0	0	0	0	0	0	0	0	0	0.209205
SLC2A1-AS1	0.66335	0.152439	0	0.851064	0	2.23844	0.14771	0	0	0.753296	0.355872	0	0.293255	0	0	0	11.1111	0	3.88007	0.208333	0.0914077	0	0	0	2.38095	0.3003	1.02564	1.6	0	0	2.08044	0	0	0	0	0.260564	1.40845	0.41841
AC099795.1	0	0	0	0	0	0	0	0	0	0	0	0	0	0	0	0	0	0	0	0	0	0	0	0	0	0	0	0	0	0	0	0	0	0	0	0	0	0
RNU6-880P	0	0	0	0	0	0	0	0	0	0	0	0	0	0	0	0	0	0	0	0	0	0	0	0	0	0	0	0	0	0	0	0	0	0	0	0	0	0
RF00026-1	0	0	0	0	0	0	0	0	0	0	0	0	0	0	0	0	0	0	0	0	0	0	0	0	0	0	0	0	0	0	0	0	0	0	0	0	0	0
AL161637.1	0	0	0	0	0	0	0	0	0	0	0	0	0	0	0	0	0	0	0	0	0	0	0	0	0	0	0	0	0	0	0	0	0	0	0	0	0	0
FAM183A	0.829187	0.457317	0	0.851064	1.21951	3.50365	0	1.49254	2.12766	0.188324	0.355872	0.431655	2.24829	0	0	0	11.1111	0.396825	94.8854	0.208333	0.448729	0	0	0.724638	0	0.3003	0.512821	0.8	0	0	4.16089	0	7.69231	0	0	1.13289	0	0.41841
EBNA1BP2	12.272	8.9939	32.4324	15.3191	9.7561	36.691	27.7696	17.9104	68.0851	14.5009	11.7438	11.6547	26.9795	30.9353	18.6335	30.5556	0	10.7143	64.3739	19.5833	45.9614	62.5	60	1.44928	11.9048	13.7137	17.4359	40.8	17.6471	52.6316	45.7698	50	46.1538	68	44.1176	64.0648	22.5352	20.5021
MIR6733	0	0	0	0	0	0	0	0	0	0	0	0	0	0	0	0	0	0	0	0	0	0	0	0	0	0	0	0	0	0	0	0	0	0	0	0	0	0
CFAP57	0.165837	0	0	0.851064	0	0.243309	0.443131	0	0	0.376648	0.355872	0.0719424	0.977517	0	0	0	11.1111	0	71.4286	0.625	0.132957	0	0	0	0	0	0	0.8	0	0	0.832178	12.5	0	0	0.980392	0.80435	0	0.209205
RNA5SP46	0	0	0	0	0	0	0	0	0	0	0	0	0	0	0	0	0	0	0.176367	0	0	0	0	0	0	0	0	0	0	0	0	0	0	0	0	0	0	0
TMEM125	2.15589	1.82927	1.35135	2.12766	2.43902	19.9513	1.62482	2.98507	12.766	7.15631	11.3879	1.8705	55.523	0.719424	12.4224	0	22.2222	1.19048	58.2011	2.91667	1.53731	0	0	1.44928	3.96825	2.4024	3.07692	7.2	0	31.5789	52.982	75	53.8462	4	77.9412	89.8493	7.04225	6.06695
C1orf210	0.165837	0	2.7027	0.851064	1.21951	11.7762	0.295421	0	2.12766	0.94162	0	0.359712	13.2942	0.719424	0	2.77778	11.1111	0	13.0511	0.208333	0.324082	0	0	0.724638	0.793651	0.700701	0.512821	2.4	0	0	28.8488	25	69.2308	0	28.9216	55.2056	0	1.04603
TIE1	0.995025	0.152439	2.7027	0.851064	8.53659	3.99027	10.0443	5.97015	65.9574	34.6516	43.8909	0.57554	3.0303	0.719424	49.0683	52.7778	22.2222	1.19048	2.82187	36.6667	1.24647	0	0	1.44928	0.793651	1.1011	4.10256	3.2	0	5.26316	3.19001	0	0	0	0.980392	2.40172	2.8169	34.9372
MPL	0	0	0	0	1.21951	0	0	0	0	0	0	0	0	0	0	0	0	0	0.176367	0	0.00830979	0	0	0	0	0	0	0	0	0	0	0	0	0	0	0.0566444	0	0
AL139289.2	0.995025	0	0	0.851064	0	2.23844	0.886263	1.49254	0	0.188324	0.474496	0.28777	2.8348	0	0.621118	0	0	0.396825	6.34921	0.833333	1.65365	6.25	0	0	0	0.600601	2.05128	0.8	0	0	2.91262	0	7.69231	0	1.96078	4.1577	1.40845	0.83682
CDC20	2.6534	0.304878	0	0	1.21951	0.875912	0.14771	0	0	0.376648	0.118624	0	0.782014	4.31655	0	0	0	0	2.99824	0.833333	0.722952	0	0	0.724638	0.793651	0.2002	0	3.2	0	5.26316	3.32871	0	0	0	6.86275	11.5668	0	0.627615
ELOVL1	10.9453	10.3659	28.3784	10.6383	10.9756	23.601	13.7371	10.4478	55.3191	17.8908	15.6584	19.1367	20.8211	32.7338	22.9814	25	11.1111	21.8254	20.9877	31.4583	44.6402	43.75	10	8.69565	12.6984	23.5235	16.4103	14.4	11.7647	57.8947	37.1706	37.5	53.8462	32	44.1176	60.6661	11.2676	23.431
MIR6734	0	0	0	0	0	0	0	0	0	0	0	0	0	0	0	0	0	0	0	0	0	0	0	0	0	0	0	0	0	0	0	0	0	0	0	0	0	0
MED8	10.9453	9.14634	31.0811	8.51064	8.53659	19.2214	18.4638	11.9403	27.6596	13.371	11.1507	17.0504	18.3773	26.6187	12.4224	5.55556	22.2222	15.873	26.8078	16.6667	50.2825	50	50	8.69565	12.6984	16.4164	17.9487	32	0	21.0526	30.3745	37.5	38.4615	36	35.2941	53.5856	18.3099	15.0628
AL139289.1	0	0	0	0	0	0.0486618	0	0	0	0	0	0	0	0	0	0	0	0	0	0	0.0249294	0	0	0.724638	0	0	0.512821	0	0	0	0	0	0	0	0	0.0226578	0	0
SZT2	8.95522	7.46951	6.75676	5.95745	12.1951	12.7494	6.64697	5.97015	6.38298	4.7081	6.28707	6.47482	11.2414	9.35252	6.8323	11.1111	0	6.74603	19.9295	7.29167	15.4894	12.5	10	2.89855	7.14286	8.60861	9.23077	2.4	11.7647	10.5263	13.0374	25	23.0769	0	11.2745	21.5702	15.493	9.41423
SZT2-AS1	0	0	0	0.425532	0	0.0486618	0	0	0	0	0	0	0.195503	0	0	0	0	0	0.352734	0	0.0166196	0	0	0	0	0.1001	0	0	0	0	0	0	0	0	0	0.135947	0	0
MIR6735	0	0	0	0	0	0	0	0	0	0	0	0	0	0	0	0	0	0	0	0	0	0	0	0	0	0	0	0	0	0	0	0	0	0	0	0	0	0
HYI	6.30182	5.4878	28.3784	22.1277	3.65854	34.3552	29.8375	37.3134	17.0213	4.89642	5.81257	2.23022	33.6266	16.9065	8.07453	19.4444	22.2222	2.77778	38.6243	15.4167	23.9156	68.75	20	2.89855	3.1746	6.30631	8.20513	40	23.5294	21.0526	44.9376	87.5	38.4615	28	50.9804	78.1466	40.8451	10.8787
HYI-AS1	0	0	0	0	0	0.243309	0	0	0	0	0	0	0.195503	0	0	0	0	0	0.352734	0	0.0997175	0	0	0	0	0	0	0	0	0	0	0	0	0	0.490196	0.362524	0	0.209205
PTPRF	2.98507	1.37195	12.1622	6.80851	1.21951	56.983	0.886263	14.9254	4.25532	6.40301	4.98221	0.863309	50.9286	2.15827	5.59006	8.33333	33.3333	1.5873	82.716	4.58333	1.26309	75	30	2.17391	3.1746	0.800801	5.64103	5.6	0	47.3684	68.7933	87.5	84.6154	12	79.4118	68.2112	7.04225	9.83264
[truncated: 57,489 more rows]

## Sheet: Skeletal muscle
Supplementary File 9C. The percentage of cells that express a gene per cell type in skeletal muscle.
[truncated: 58,871 more rows]

## Sheet: Spleen
Supplementary File 9D. The percentage of cells that express a gene per cell type in spleen.
[truncated: 58,871 more rows]

[truncated: 2 more sheets: Tongue, Trachea]
