# Supplementary material for: Affected cell types for hundreds of Mendelian diseases revealed by analysis of human and mouse single-cell data
Source: eLife. 2024 Jan 10;13:e84613. doi: 10.7554/eLife.84613 (PMC10830129; doi:10.7554/eLife.84613)
Supplement: Supplementary file 10. [file elife-84613-supp10.xlsx]

## Sheet: Supplementary File 10
Supplementary File 10. The percentage of cells that express a gene per cell type in mouse tissues.
Percentages of cells expressing a gene with normalized counts ≥0.05. Data per tissue appear in distinct tabs, as follows: 10A Bone marrow, 10B Lung, 10C Skeletal muscle, 10D Spleen, 10E Tongue, and 10F Trachea.

## Sheet: Bone marrow
Supplementary File 10A. The percentage of cells that express a gene per cell type in bone marrow.
Gene symbol	conventional dendritic cell	T cell	neutrophilic metamyelocyte	promyelocyte	segmented neutrophil of bone marrow	band form neutrophil	monocyte	reticulocyte	neutrophilic myeloblast	myelocyte	immature B cell	basophil	hematopoietic stem cell	early pro-B cell	macrophage	precursor B cell	proerythroblast	mature B cell	erythroblast	plasma cell
0610005C13Rik	0	0	0	0	0	0	0.223214	0	0	0	0	0	0.714286	0	0	0.591716	0	0	0	0
0610007C21Rik	54.0816	26.1905	28.4024	69.0196	8.87097	11.5993	45.0893	4.02685	75.7576	74.2222	31.405	50.8197	60.7143	33.8462	58.9041	40.2367	25.1701	24.5455	3.44828	77.4194
0610007L01Rik	35.7143	19.0476	58.8757	48.6275	8.87097	8.96309	19.8661	4.69799	46.4646	89.7778	25.6198	34.4262	42.1429	10.7692	26.9406	31.3609	38.7755	16.3636	5.17241	87.0968
0610007N19Rik	0	0.595238	0.591716	0	0	0.175747	0.223214	0.671141	0	0	0.826446	0	2.85714	1.53846	3.19635	1.77515	0	5.45455	0.862069	0
0610007P08Rik	14.2857	8.92857	10.9467	15.2941	1.6129	0.527241	4.01786	0.671141	16.1616	22.2222	11.5702	8.19672	17.8571	3.07692	6.39269	12.426	19.7279	4.54545	0	6.45161
0610007P14Rik	48.9796	18.4524	40.2367	59.6078	2.41935	3.51494	18.5268	2.68456	60.6061	81.7778	47.1074	47.541	56.4286	16.9231	43.379	49.7041	43.5374	20	0.862069	32.2581
0610007P22Rik	19.3878	10.7143	15.0888	21.9608	2.41935	4.04218	8.92857	1.34228	20.202	47.5556	16.5289	24.5902	25	12.3077	14.1553	24.8521	21.0884	16.3636	0	16.129
0610008F07Rik	0	0	0	0	0	0	0	0	0	0	0	0	0	0	0	0	0	0	0	0
0610009B14Rik	0	0	0	0	0	0	0	0	0	0	0	0	0	0	0	0	0	0	0	0
0610009B22Rik	27.551	6.54762	24.8521	43.1373	4.83871	9.31459	15.4018	2.68456	39.3939	64.4444	28.0992	19.6721	45	13.8462	12.3288	31.9527	34.0136	3.63636	3.44828	35.4839
0610009D07Rik	87.7551	64.881	88.7574	96.8627	41.129	56.4148	82.3661	22.8188	98.9899	97.3333	96.6942	73.7705	90.7143	76.9231	70.3196	94.6746	77.551	57.2727	30.1724	70.9677
0610009L18Rik	9.18367	4.7619	5.91716	9.41176	4.03226	4.21793	6.25	1.34228	7.07071	11.1111	1.65289	9.83607	19.2857	3.07692	6.84932	3.5503	0	0.909091	0	0
0610009O20Rik	22.449	10.7143	21.5976	24.7059	0	2.46046	4.6875	3.3557	24.2424	50.6667	35.5372	14.7541	31.4286	16.9231	7.30594	34.3195	39.4558	4.54545	0.862069	6.45161
0610010B08Rik	0	1.19048	0	0.784314	0	0	0.223214	0	1.0101	0	1.65289	0	1.42857	0	0	0	0	0	0	3.22581
0610010F05Rik	8.16327	1.78571	13.0178	25.4902	0	0.878735	5.35714	0	17.1717	30.2222	9.91736	13.1148	24.2857	0	2.73973	12.426	8.16327	2.72727	0	6.45161
0610010K14Rik	77.551	39.881	72.7811	79.2157	5.64516	17.5747	39.7321	7.38255	89.899	88	70.2479	52.459	70.7143	58.4615	52.5114	71.0059	63.9456	32.7273	12.069	41.9355
0610010O12Rik	0	0	0.295858	0	0	1.05448	0	1.34228	0	0	0	0	0	0	0	0	1.36054	0.909091	0	0
0610011F06Rik	19.3878	25.5952	26.0355	22.7451	1.6129	5.9754	11.8304	2.68456	20.202	65.3333	21.4876	39.3443	46.4286	24.6154	12.7854	34.3195	28.5714	17.2727	0.862069	38.7097
0610011L14Rik	13.2653	7.14286	5.32544	13.3333	0	3.69069	8.25893	0	16.1616	17.3333	9.91736	6.55738	17.1429	9.23077	7.76256	15.3846	17.0068	6.36364	0	6.45161
0610012G03Rik	69.3878	38.0952	51.4793	81.9608	11.2903	21.0896	60.0446	8.05369	73.7374	91.5556	36.3636	62.2951	82.8571	20	47.9452	57.3964	37.415	37.2727	6.03448	41.9355
0610012H03Rik	2.04082	0	0.295858	2.35294	0	0.175747	0	0	0	8.44444	0	0	4.28571	0	0.456621	0	1.36054	0.909091	0	0
0610030E20Rik	30.6122	13.6905	53.2544	37.6471	20.1613	24.6046	14.9554	4.02685	37.3737	54.2222	41.3223	18.0328	38.5714	6.15385	19.6347	43.1953	21.7687	20.9091	0.862069	12.9032
0610031J06Rik	45.9184	27.9762	43.4911	67.451	16.129	15.8172	44.4196	4.69799	78.7879	80.8889	34.7107	63.9344	45.7143	46.1538	44.7489	35.503	23.1293	23.6364	4.31034	74.1935
0610031O16Rik	0	0	0	0	0	0	0	0	0	0	0	0	0	0	0	0	0	0	0	0
0610037L13Rik	14.2857	11.9048	39.3491	36.4706	11.2903	16.8717	12.7232	3.3557	26.2626	68.8889	18.1818	14.7541	33.5714	20	11.8721	32.5444	15.6463	10	1.72414	9.67742
0610037P05Rik	31.6327	14.881	48.5207	38.8235	16.129	19.1564	19.8661	3.3557	61.6162	73.3333	42.9752	36.0656	40	21.5385	19.1781	39.0533	59.1837	16.3636	13.7931	9.67742
0610038B21Rik	1.02041	0	0	0.784314	0	0	0.223214	0	1.0101	3.11111	0.826446	1.63934	2.85714	1.53846	0	1.18343	0	0	0	0
0610038L08Rik	0	0	0.295858	0	0	0	0	0	0	0	0	0	0	0	0	0	0	0	0	0
0610039K10Rik	3.06122	1.19048	0.591716	3.52941	1.6129	0.527241	2.00893	1.34228	6.06061	4.88889	10.7438	0	2.14286	0	0.456621	5.32544	1.36054	0.909091	0.862069	0
0610040B10Rik	1.02041	0.595238	0.887574	2.7451	0	0.527241	0.892857	0	0	4.88889	0.826446	0	3.57143	0	2.28311	0	2.72109	0.909091	0	3.22581
0610040F04Rik	0	0	0.295858	0	0	0	0	0	0	0	0	0	0	0	0	0	0	0	0	0
0610040J01Rik	8.16327	0	0.295858	18.0392	0.806452	0.527241	10.0446	0	7.07071	14.6667	0	1.63934	0.714286	0	0	0	0.680272	0	0	0
0610043K17Rik	0	1.78571	0	0	0	0	0	0	0	0	0	1.63934	0	0	0	0.591716	3.40136	0	0.862069	0
0910001L09Rik	93.8776	55.3571	99.1124	98.0392	83.0645	94.5518	94.8661	34.2282	98.9899	98.6667	46.281	90.1639	87.8571	67.6923	81.7352	70.4142	39.4558	50	14.6552	58.0645
100043387	2.04082	2.97619	0	2.7451	0	0.175747	2.00893	0.671141	5.05051	6.66667	2.47934	1.63934	2.85714	4.61538	3.65297	1.18343	0.680272	0.909091	0	9.67742
1100001G20Rik	48.9796	28.5714	100	54.1176	100	100	38.1696	65.7718	60.6061	94.2222	33.0579	37.7049	43.5714	23.0769	30.5936	42.6036	57.8231	37.2727	34.4828	61.2903
1110001A16Rik	26.5306	23.8095	26.3314	56.4706	10.4839	12.3023	27.4554	4.69799	58.5859	67.1111	19.8347	14.7541	47.1429	26.1538	22.3744	33.7278	31.9728	17.2727	1.72414	32.2581
1110001J03Rik	55.102	36.9048	49.7041	76.0784	4.83871	19.3322	32.3661	4.69799	73.7374	96	47.1074	57.377	73.5714	18.4615	27.8539	52.071	42.1769	26.3636	10.3448	35.4839
1110002B05Rik	91.8367	61.9048	94.0828	95.6863	7.25806	25.4833	66.9643	6.04027	98.9899	99.1111	85.124	90.1639	90	30.7692	76.7123	76.9231	25.1701	41.8182	4.31034	48.3871
1110002L01Rik	1.02041	5.95238	1.18343	3.13725	1.6129	0.878735	2.45536	0	0	5.77778	8.26446	1.63934	7.85714	1.53846	0.913242	6.50888	4.08163	5.45455	0	0
1110002N22Rik	2.04082	8.33333	3.5503	5.88235	0	0.351494	3.79464	0	3.0303	20.4444	6.61157	1.63934	10.7143	12.3077	5.47945	13.0178	6.12245	2.72727	0	0
1110003E01Rik	84.6939	44.6429	89.0533	76.0784	55.6452	84.1828	68.9732	14.094	79.798	97.7778	90.0826	77.0492	83.5714	95.3846	93.1507	88.7574	19.0476	82.7273	6.89655	64.5161
1110004E09Rik	14.2857	13.0952	6.80473	29.8039	0.806452	0.527241	5.13393	0	21.2121	58.6667	21.4876	13.1148	36.4286	7.69231	10.5023	38.4615	23.1293	8.18182	1.72414	32.2581
1110004F10Rik	60.2041	36.3095	40.8284	76.0784	11.2903	11.9508	39.0625	8.05369	67.6768	88.4444	75.2066	52.459	72.8571	44.6154	42.4658	82.8402	59.1837	30	13.7931	67.7419
1110005A03Rik	71.4286	55.3571	49.7041	52.9412	10.4839	15.4657	45.9821	7.38255	58.5859	72.4444	55.3719	36.0656	59.2857	49.2308	59.3607	66.8639	42.1769	54.5455	6.03448	54.8387
1110006O24Rik	0	1.78571	0.295858	2.35294	0.806452	0.175747	0.669643	0	1.0101	3.11111	0.826446	0	3.57143	0	1.36986	1.77515	6.80272	0.909091	1.72414	0
1110007C09Rik	59.1837	21.4286	78.6982	85.4902	61.2903	49.0334	64.2857	10.0671	89.899	71.5556	16.5289	52.459	61.4286	15.3846	26.9406	14.7929	9.52381	27.2727	2.58621	12.9032
1110008F13Rik	86.7347	45.2381	97.6331	98.8235	87.9032	86.2917	90.1786	16.1074	98.9899	99.1111	69.4215	85.2459	95	47.6923	57.5342	82.8402	64.6259	46.3636	15.5172	77.4194
1110008J03Rik	3.06122	1.19048	2.07101	6.66667	0.806452	0.175747	1.5625	0	2.0202	8.44444	2.47934	6.55738	11.4286	3.07692	0.913242	5.32544	6.12245	0.909091	0	3.22581
1110008L16Rik	5.10204	1.78571	2.07101	10.5882	0	0.351494	2.67857	0	6.06061	27.5556	33.8843	4.91803	22.8571	6.15385	3.19635	29.5858	9.52381	0.909091	0.862069	6.45161
1110008P14Rik	34.6939	30.9524	88.4615	54.902	43.5484	60.2812	37.5	11.4094	66.6667	64.8889	26.4463	44.2623	30.7143	13.8462	50.2283	36.6864	39.4558	30	2.58621	90.3226
1110012J17Rik	0	0	0	0	0	0	0	0	0	0	0	0	0	0	0	0	0	0	0	0
1110012L19Rik	14.2857	9.52381	9.76331	21.1765	9.67742	5.27241	11.8304	0	21.2121	39.5556	11.5702	8.19672	17.8571	10.7692	12.7854	17.7515	9.52381	6.36364	3.44828	22.5806
1110014N23Rik	30.6122	6.54762	15.0888	34.902	3.22581	5.79965	18.9732	4.02685	48.4848	41.7778	19.0083	16.3934	23.5714	9.23077	17.3516	17.7515	14.2857	8.18182	1.72414	25.8065
1110015O18Rik	0	0	0	0	0	0	0	0	0	0	0	0	0	0	0	0	0	0	0	0
1110017D15Rik	0	0	0	0	0	0	0.223214	0	0	0	0	0	0	0	0	0	0	0	0	0
1110017F19Rik	4.08163	0	21.5976	1.56863	0	6.85413	0.446429	0.671141	3.0303	12.4444	0.826446	3.27869	9.28571	0	7.30594	2.36686	6.80272	0	0	0
1110018G07Rik	17.3469	2.38095	7.98817	12.9412	4.03226	5.6239	7.36607	6.71141	11.1111	26.6667	13.2231	0	10	10.7692	7.76256	18.3432	18.3673	7.27273	18.1034	12.9032
1110018J18Rik	14.2857	4.16667	6.50888	13.7255	3.22581	2.6362	9.15179	1.34228	24.2424	12.8889	7.43802	1.63934	14.2857	3.07692	18.7215	10.6509	7.48299	2.72727	2.58621	9.67742
1110019D14Rik	1.02041	2.97619	2.07101	5.4902	1.6129	1.05448	2.45536	0	3.0303	10.6667	4.13223	3.27869	5.71429	4.61538	1.36986	3.5503	4.7619	1.81818	0.862069	6.45161
1110020A21Rik	0	1.19048	2.36686	2.35294	0	0.175747	0.669643	0	3.0303	5.77778	12.3967	3.27869	4.28571	0	1.82648	6.50888	14.2857	0.909091	6.89655	0
1110020G09Rik	15.3061	4.16667	30.7692	38.8235	4.03226	8.08436	10.0446	51.0067	30.303	76.4444	23.1405	31.1475	45.7143	3.07692	5.02283	40.2367	72.1088	2.72727	69.8276	6.45161
1110021J02Rik	29.5918	5.95238	38.4615	45.098	0.806452	16.8717	11.1607	5.36913	42.4242	69.7778	36.3636	24.5902	30.7143	12.3077	17.3516	33.7278	29.932	10	3.44828	45.1613
1110021L09Rik	0	0	0	0	0	0	0	0	0	0	0	0	0.714286	0	1.36986	0	1.36054	0	0	0
1110028C15Rik	23.4694	1.19048	7.10059	8.23529	2.41935	0.527241	5.35714	0.671141	10.101	15.5556	40.4959	3.27869	20.7143	49.2308	8.21918	36.6864	3.40136	4.54545	0.862069	0
1110028F11Rik	0	1.19048	0.295858	0.392157	0	0.175747	0.446429	0	0	0.888889	0.826446	70.4918	5.71429	0	0	0.591716	2.72109	0	0	0
1110028F18Rik	0	0	0	0	0	0	0	0	0	0	0	0	0	0	0	0	0	0	0	0
1110031I02Rik	9.18367	2.38095	8.57988	16.4706	0	0.527241	2.23214	0	15.1515	30.2222	9.09091	8.19672	19.2857	3.07692	5.93607	15.3846	14.2857	10	0	48.3871
1110032A03Rik	16.3265	4.16667	10.0592	14.5098	0.806452	3.51494	6.02679	5.36913	17.1717	26.2222	12.3967	11.4754	17.8571	4.61538	19.6347	13.0178	23.8095	0.909091	25.8621	3.22581
1110032A04Rik	0	0	0	0	0	0	0	0	0	0	0	0	0	0	0	0	0	0	0	0
1110032F04Rik	0	0.595238	0	0	0	0	0	0	0	0	0	11.4754	0	0	0.456621	2.36686	0.680272	0	0	0
1110034A24Rik	18.3673	6.54762	12.7219	30.5882	0	0.878735	3.34821	0	18.1818	39.1111	28.9256	1.63934	27.1429	9.23077	5.93607	37.8698	42.8571	2.72727	0.862069	3.22581
1110034B05Rik	8.16327	3.57143	7.10059	10.5882	0.806452	1.93322	4.91071	0	15.1515	18.6667	18.1818	6.55738	10	7.69231	7.30594	13.6095	8.16327	3.63636	0.862069	9.67742
1110034G24Rik	6.12245	19.6429	11.5385	18.8235	7.25806	8.6116	21.6518	20.8054	22.2222	27.1111	5.78512	21.3115	13.5714	4.61538	9.13242	7.69231	18.3673	8.18182	29.3103	12.9032
1110035M17Rik	0	0	0	2.7451	0	1.05448	3.79464	0	1.0101	1.77778	0	0	1.42857	0	0	0	1.36054	0	0	0
1110036E04Rik	0	0	0	0	0	0	0	0	0	0	0	0	0	0	0	0	0	0	0	0
1110037F02Rik	28.5714	28.5714	25.4438	29.0196	6.45161	7.73286	17.6339	2.01342	44.4444	39.5556	36.3636	21.3115	25.7143	24.6154	16.4384	35.503	27.2109	14.5455	3.44828	16.129
1110038B12Rik	34.6939	22.619	14.2012	47.0588	0.806452	1.93322	18.75	2.68456	44.4444	80.4444	38.843	19.6721	70.7143	47.6923	7.76256	64.497	33.3333	12.7273	0.862069	9.67742
1110038D17Rik	14.2857	7.14286	15.3846	17.6471	12.0968	5.6239	10.0446	9.39597	22.2222	20.8889	11.5702	8.19672	10	6.15385	5.93607	14.2012	49.6599	17.2727	43.9655	9.67742
1110038F14Rik	36.7347	17.8571	31.0651	43.9216	4.03226	9.13884	28.125	2.68456	41.4141	69.3333	38.0165	26.2295	46.4286	33.8462	23.7443	45.5621	23.8095	12.7273	1.72414	29.0323
1110046J04Rik	0	0	0	0	0	0	0	0	0	0	0	0	0	0	0	0	0	0	0	0
1110049F12Rik	32.6531	17.2619	23.9645	36.4706	6.45161	8.6116	13.3929	30.8725	31.3131	57.7778	24.7934	29.5082	40	24.6154	12.7854	36.6864	68.7075	13.6364	50.8621	29.0323
1110050K14Rik	0	0	0	0	0	0	0	0	0	0	0	0	0	0	0	0	0	0	0	0
1110051M20Rik	2.04082	2.38095	0.591716	4.70588	0	0.351494	1.11607	0.671141	1.0101	10.2222	3.30579	0	12.8571	7.69231	4.56621	5.91716	0.680272	0.909091	0	3.22581
1110054M08Rik	8.16327	14.881	3.25444	6.27451	0.806452	4.39367	3.79464	1.34228	2.0202	1.77778	7.43802	0	13.5714	7.69231	10.9589	10.0592	0.680272	7.27273	0	3.22581
1110054O05Rik	25.5102	6.54762	20.1183	31.3725	1.6129	2.46046	9.375	2.01342	29.2929	45.3333	19.0083	8.19672	28.5714	16.9231	10.0457	40.2367	15.6463	6.36364	0.862069	22.5806
1110057K04Rik	24.4898	11.9048	13.6095	32.549	4.83871	4.39367	17.4107	3.3557	19.1919	42.6667	20.6612	24.5902	31.4286	12.3077	15.5251	25.4438	17.0068	10	0.862069	12.9032
1110058L19Rik	26.5306	25.5952	14.7929	41.9608	0.806452	4.56942	20.5357	5.36913	40.404	67.5556	33.8843	26.2295	55	32.3077	25.5708	46.1538	47.619	12.7273	11.2069	38.7097
1110059E24Rik	39.7959	12.5	30.1775	47.8431	6.45161	8.6116	17.6339	2.68456	45.4545	60.4444	47.1074	24.5902	45.7143	15.3846	23.2877	52.071	10.8844	35.4545	0.862069	41.9355
1110059G10Rik	40.8163	7.14286	27.2189	57.2549	7.25806	8.78735	23.4375	2.68456	57.5758	54.2222	38.0165	24.5902	39.2857	13.8462	23.2877	46.7456	41.4966	10	8.62069	12.9032
1110059M19Rik	0	0	0	0	0	0	0	0	0	0	0	0	0	0	0	0	0	0	0	0
1110065P20Rik	15.3061	10.119	10.0592	22.7451	5.64516	2.28471	8.25893	2.01342	20.202	29.3333	12.3967	6.55738	24.2857	6.15385	10.5023	23.0769	14.2857	7.27273	1.72414	3.22581
1110067D22Rik	0	2.38095	0.591716	1.96078	0.806452	0	0.223214	0	1.0101	8.88889	2.47934	19.6721	7.14286	0	0.913242	3.5503	5.44218	0.909091	0	6.45161
1190002F15Rik	51.0204	10.119	86.9822	62.7451	1.6129	6.15114	2.67857	17.4497	81.8182	80.4444	95.8678	42.623	39.2857	20	6.39269	78.6982	97.9592	7.27273	75.8621	25.8065
1190002H23Rik	11.2245	16.0714	83.1361	25.4902	7.25806	26.8893	8.70536	8.05369	20.202	94.6667	27.2727	9.83607	23.5714	20	7.30594	36.0947	90.4762	1.81818	39.6552	77.4194
1190002N15Rik	13.2653	7.7381	5.32544	11.3725	0.806452	0.702988	4.91071	0	9.09091	10.2222	10.7438	0	20.7143	0	8.21918	10.6509	18.3673	0	0	0
1190003J15Rik	0	0	0	0	0	0	0	0	0	0	0	0	0	0	0	0	0	0	0	0
1190003K10Rik	0	0	0	0	0	0	0	0	0	0	0	0	0	0	0	0	0	0	0	0
1190005F20Rik	10.2041	8.92857	14.497	16.8627	4.83871	5.6239	8.25893	2.01342	16.1616	35.1111	15.7025	27.8689	22.1429	20	7.76256	21.3018	17.0068	7.27273	1.72414	12.9032
1190005I06Rik	1.02041	0	0	1.17647	0	0.175747	0	0	2.0202	1.33333	0.826446	1.63934	1.42857	0	0.456621	2.36686	1.36054	0	0	0
1190007F08Rik	1.02041	1.19048	1.18343	0.784314	0.806452	0	0.446429	0.671141	0	1.77778	0	0	8.57143	0	0	0	77.551	0	17.2414	0
1190007I07Rik	24.4898	19.6429	13.6095	35.2941	2.41935	1.58172	8.25893	2.01342	22.2222	67.1111	23.1405	22.9508	52.1429	9.23077	15.5251	44.9704	22.449	13.6364	0	32.2581
1200009I06Rik	1.02041	0	0.295858	0.784314	0.806452	0.351494	0.669643	0	2.0202	3.55556	0	1.63934	4.28571	0	0	0	0.680272	0	0	0
1200011I18Rik	21.4286	7.7381	14.7929	29.0196	2.41935	5.09666	19.6429	4.69799	38.3838	32.8889	23.1405	14.7541	29.2857	9.23077	14.6119	26.0355	22.449	6.36364	0.862069	9.67742
1200011M11Rik	7.14286	1.78571	10.6509	7.05882	0.806452	3.51494	2.45536	0	10.101	22.2222	9.09091	4.91803	10.7143	0	2.73973	6.50888	8.84354	1.81818	0	6.45161
1200014J11Rik	28.5714	16.0714	28.9941	40.7843	6.45161	10.0176	16.7411	2.01342	41.4141	54.2222	56.1983	27.8689	40.7143	10.7692	14.1553	44.9704	32.6531	16.3636	2.58621	9.67742
1200016B10Rik	23.4694	13.0952	20.4142	25.8824	6.45161	7.20562	12.0536	26.8456	19.1919	40	28.0992	29.5082	29.2857	12.3077	14.1553	20.7101	44.898	15.4545	34.4828	16.129
1300001I01Rik	4.08163	4.7619	1.77515	21.9608	0	0.702988	5.35714	0	8.08081	29.3333	3.30579	6.55738	18.5714	4.61538	5.02283	26.6272	17.0068	5.45455	0.862069	9.67742
1300002E11Rik	7.14286	21.4286	2.07101	4.31373	0.806452	0.527241	2.90179	2.01342	2.0202	10.6667	29.7521	9.83607	15	21.5385	16.4384	36.6864	34.6939	13.6364	9.48276	29.0323
1300002K09Rik	3.06122	0	0	0.784314	0	0.175747	1.11607	0	3.0303	0.444444	0.826446	0	0	0	3.19635	0	0	0	0	0
1300010F03Rik	3.06122	1.78571	4.73373	6.27451	0	1.05448	0.669643	0.671141	3.0303	10.6667	5.78512	0	8.57143	4.61538	1.36986	4.73373	4.08163	1.81818	0	3.22581
1300014I06Rik	0	2.38095	0	0.392157	0	0	0.446429	0.671141	0	0.444444	0.826446	1.63934	0	0	0.913242	1.18343	0	11.8182	0	3.22581
1300015D01Rik	0	0	0	0	0	0	0	0	0	0	0	0	0	0	0	0	1.36054	0	1.72414	0
1300017J02Rik	1.02041	0	0.887574	0	0	0	0.223214	10.7383	1.0101	0.888889	0	0	0.714286	0	0	1.18343	45.5782	0	55.1724	0
1300018I17Rik	11.2245	1.78571	12.1302	12.1569	4.03226	6.50264	11.8304	1.34228	12.1212	17.7778	4.13223	6.55738	13.5714	10.7692	2.28311	6.50888	5.44218	4.54545	0	3.22581
1300018J18Rik	8.16327	6.54762	46.7456	17.6471	5.64516	30.7557	10.4911	4.69799	16.1616	38.6667	9.91736	6.55738	17.8571	4.61538	9.58904	8.87574	13.6054	6.36364	2.58621	12.9032
1500001M20Rik	14.2857	4.16667	6.21302	25.8824	0	0.878735	5.80357	0	25.2525	43.1111	7.43802	13.1148	28.5714	3.07692	4.56621	27.8107	21.0884	3.63636	0	3.22581
1500002O10Rik	0	0	0	0	0	0	0	0	0	0	0	0	0	0	0	0	0	0	0	0
1500002O20Rik	18.3673	7.14286	31.3609	19.2157	4.83871	21.7926	7.8125	1.34228	23.2323	29.3333	14.876	21.3115	20.7143	9.23077	7.30594	13.6095	18.3673	10	0	6.45161
1500003O03Rik	29.5918	17.2619	55.6213	55.2941	49.1935	42.1793	39.9554	42.953	65.6566	59.5556	32.2314	27.8689	51.4286	26.1538	21.9178	36.0947	51.7007	11.8182	43.9655	32.2581
1500004A13Rik	0	0.595238	0	0.392157	0	0	0.223214	0	1.0101	0	0	0	0	0	0	0	0	0.909091	0	0
1500009C09Rik	0	0	0	0	0	0	0	0	0	0	0	0	0	0	0	0	0	0	0	0
1500009L16Rik	9.18367	1.19048	0	0	0	0.351494	0.223214	0.671141	0	1.77778	3.30579	0	15.7143	4.61538	1.36986	13.0178	0	0	0	0
1500010J02Rik	15.3061	2.38095	16.2722	23.1373	1.6129	1.23023	9.375	0.671141	24.2424	26.6667	21.4876	4.91803	22.8571	4.61538	2.28311	13.6095	21.0884	5.45455	2.58621	3.22581
1500011B03Rik	17.3469	9.52381	4.14201	21.5686	4.03226	1.75747	11.8304	2.01342	14.1414	24.4444	9.09091	16.3934	28.5714	6.15385	12.7854	14.7929	14.2857	9.09091	0.862069	9.67742
1500011H22Rik	21.4286	2.97619	8.87574	12.1569	0	1.23023	0.892857	2.68456	17.1717	48.8889	37.1901	16.3934	31.4286	29.2308	3.19635	42.0118	31.2925	6.36364	0.862069	12.9032
1500011K16Rik	26.5306	26.7857	15.6805	55.2941	0	1.23023	23.8839	4.02685	25.2525	87.1111	5.78512	27.8689	60	21.5385	34.7032	39.645	23.8095	13.6364	1.72414	19.3548
1500012F01Rik	74.4898	57.1429	33.1361	77.6471	9.67742	11.2478	69.8661	9.39597	78.7879	77.3333	56.1983	40.9836	87.1429	75.3846	58.9041	68.6391	47.619	69.0909	14.6552	32.2581
1500012K07Rik	0	0	0	0	0	0	0	0	0	0	0	0	0	0	0	0	0	0	0	0
1500015A07Rik	6.12245	4.16667	4.73373	10.1961	0.806452	1.58172	3.34821	0	6.06061	8.44444	4.95868	8.19672	15	6.15385	7.76256	11.8343	4.7619	1.81818	0.862069	3.22581
1500015L24Rik	0	0	0	0	0	0	0	0	0	0	0	0	0	0	0	0	0	0	0	0
1500015O10Rik	0	0	0	0	0	0	0	0	0	0	0	0	0	0	0	0	0	0	0	0
1500016L03Rik	0	0	0.295858	0	0	0.175747	0	0	0	0	0	0	0	0	0	0	0	0	0	0
1500017E21Rik	0	0	0	0	0	0	0	0	0	0.444444	0	0	0	0	0	0	0	0	0	0
1500031L02Rik	13.2653	10.7143	59.1716	10.1961	30.6452	42.7065	7.8125	6.71141	4.0404	50.6667	6.61157	19.6721	28.5714	7.69231	6.84932	17.1598	9.52381	8.18182	0	3.22581
1500032L24Rik	97.9592	60.119	94.0828	100	48.3871	66.4323	93.9732	48.9933	100	99.1111	95.8678	81.9672	92.8571	83.0769	94.0639	95.2663	92.517	60	63.7931	77.4194
1520402A15Rik	0	0	0	0.392157	0	0	0	0	0	0	0	0	0	0	0	0	0	2.72727	0	3.22581
1600002D24Rik	0	0	0.295858	0	0	0.702988	0	0.671141	1.0101	0	0.826446	0	0	0	0	0	0	0.909091	0	0
1600002H07Rik	5.10204	2.97619	9.76331	10.9804	0	0.527241	2.45536	0	12.1212	19.1111	14.0496	4.91803	11.4286	0	2.73973	8.87574	19.7279	1.81818	0	3.22581
1600002K03Rik	19.3878	10.7143	10.6509	45.8824	0.806452	2.46046	23.2143	3.3557	39.3939	49.7778	17.3554	36.0656	27.8571	16.9231	18.7215	21.8935	19.7279	10.9091	0.862069	22.5806
1600010M07Rik	19.3878	1.19048	11.2426	25.098	48.3871	17.9262	33.9286	8.72483	40.404	11.1111	4.13223	4.91803	5	1.53846	6.84932	2.95858	4.7619	8.18182	3.44828	6.45161
1600012F09Rik	22.449	7.7381	0.887574	15.2941	0.806452	0.527241	6.69643	0.671141	10.101	17.3333	14.0496	9.83607	32.8571	16.9231	13.6986	27.2189	14.966	10	0.862069	32.2581
1600012H06Rik	19.3878	8.33333	26.9231	29.0196	10.4839	10.0176	16.5179	1.34228	22.2222	33.7778	17.3554	16.3934	13.5714	15.3846	11.8721	14.2012	9.52381	5.45455	0.862069	9.67742
1600014C10Rik	19.3878	13.0952	52.6627	36.4706	15.3226	26.0105	30.8036	2.01342	47.4747	62.6667	3.30579	27.8689	22.1429	29.2308	10.5023	11.8343	4.08163	9.09091	2.58621	6.45161
1600014C23Rik	0	0	0	0	0	0	0	0	0	0	0	0	0	0	0	0	0	0	0	0
1600014K23Rik	0	0	0	0	0	0	0	0	0	0	0	0	0	0	0	0	0	0	0	0
1600015I10Rik	0	0	0	0	0	0	0	0	0	0	0	0	0	0	0	0	0	0	0	0
1600016N20Rik	2.04082	0.595238	0	0	0	0.175747	0	0	0	0	0.826446	1.63934	0.714286	0	0	0	0	0	0	0
1600019K03Rik	0	0	0	0	0	0	0	0	0	0	0	0	0	0	0	0	0	0	0	0
1600020E01Rik	14.2857	5.35714	9.76331	14.1176	0.806452	1.75747	9.375	67.1141	17.1717	26.2222	14.0496	16.3934	18.5714	12.3077	13.242	10.6509	39.4558	9.09091	70.6897	3.22581
1600021P15Rik	0	0	0	0	0	0	0	0	0	0	0	0	0	0	0	0	0	0	0	0
1600025M17Rik	0	0	0	0	0	0	0	0	0	0	0	0	0	0	0	0	0	0	0	0
1600027N09Rik	2.04082	0.595238	0.887574	3.52941	0	0	1.5625	0	1.0101	10.2222	3.30579	0	5.71429	0	4.10959	5.32544	2.72109	0.909091	0.862069	3.22581
1600029D21Rik	0	0	0.295858	0	0	0	0.223214	0.671141	0	0.888889	0	0	0	0	0	0.591716	0	0.909091	0	0
1600029I14Rik	0	0	0	0.392157	0	0	0	0	0	0.888889	0	0	0	0	0	0.591716	0.680272	0.909091	0	0
1600029O15Rik	0	0	0.295858	0	0	0	0.223214	0	1.0101	0	0.826446	1.63934	2.85714	0	0	0	0	1.81818	0.862069	0
1700001C02Rik	0	0	0	0	0	0	0	0	0	0	0	0	0	0	0	0	0	0	0	0
1700001C19Rik	0	0	0	0.392157	0	0	0	0	0	0.444444	0	0	1.42857	0	0	0.591716	0	0	0	0
1700001D01Rik	0	0	0	0	0	0	0	0	0	0	0	0	0	0	0	0	0	0	0	0
1700001F09Rik	0	0	0	0	0	0	0	0	0	0	0	0	0	0	0	0	0	0	0	0
1700001G11Rik	2.04082	0.595238	0.591716	1.17647	0	0.351494	0.223214	0	0	2.22222	0.826446	0	2.85714	1.53846	0.456621	0	0	0	0	0
1700001G17Rik	1.02041	0	0.887574	2.7451	0	0.175747	0	0	1.0101	3.11111	0.826446	0	2.14286	0	0.456621	1.77515	0	0	0	0
1700001J03Rik	0	0	0	0	0	0.175747	0	0	0	0	0	0	0	0	0	0	0	0	0	0
1700001J11Rik	0	0	0	0	0	0	0	0	0	0	0	0	0	1.53846	0	0	0	0	0	0
1700001K19Rik	0	0	0	0	0	0	0	0	0	0	0	0	0.714286	0	0	0	0	0	0	0
1700001K23Rik	0	0	0	0	0	0.175747	0	0	0	0	0	0	0	0	0	0	2.04082	0	1.72414	0
1700001L05Rik	2.04082	0	0	0	0.806452	0	0.446429	0.671141	1.0101	3.11111	0	0	5	0	0	2.36686	4.7619	0	0	0
1700001L19Rik	0	0	0	0	0	0	0	0	0	0	0	0	0	0	0	0	0	0	0	3.22581
1700001O22Rik	0	4.16667	0	0	0	0.175747	0	0	0	0.888889	0	0	0.714286	0	0	0	0	0	0	0
1700001P01Rik	0	0	0	0	0	0	0	0	0	0.444444	0	0	0.714286	0	0	0	0	0	0	0
1700003C15Rik	0	0	0	0	0	0	0	0	0	0	0	0	0.714286	0	0	0	0	0	0	0
1700003D09Rik	0	0	0	0	0	0	0	0	0	0	0	0	0	0	0	0	0	0	0	0
1700003E16Rik	0	0	0	0	0	0	0	0	0	0	0	0	0	0	0	0	0	0	0	0
1700003F12Rik	0	0	0.295858	0.784314	0.806452	0	0.669643	0	0	0	1.65289	0	0	0	0	1.77515	0	0	0	0
1700003F17Rik	0	0	0	0	0	0	0	0	0	0	0	0	0	0	0.456621	0	0	0	0	0
1700003G13Rik	0	0	0	0	0	0	0	0	0	0	0	0	0	0	0	0	0	0	0	0
1700003G18Rik	0	0	0	0	0	0	0	0	0	0	0	0	0	0	0	0	0	0	0	0
1700003H04Rik	0	0	0	0	0	0	0	0	0	0	0	0	0	0	0	0	0	0	0	0
1700003L19Rik	0	0	0	0	0	0	0	0	0	0	0	0	0	0	0	0	0	0	0	0
1700003M02Rik	0	0	0	0	0	0	0	0	0	0	0	0	0	0	0	0	0	0	0	0
1700003M07Rik	0	0	0	0	0	0	0.446429	0	0	0	0	0	0	0	0	0	0	0	0	3.22581
1700003P14Rik	0	0	0	0	0	0	0	0	0	0	0	0	0	0	0	0	0	0	0	0
1700006A11Rik	0	0	0	0	0	0	0	0	0	0	0	0	0	0	0	0	0	0	0	0
1700006E09Rik	0	0	0	0	0	0	0	0	0	0	0	0	0	0	0	0	0	0	0	0
1700006F04Rik	0	0	0	0	0	0	0	0	0	0	0	0	0	0	0	0	0	0	0	0
1700006H21Rik	0	0	0	0	0	0	0	0	0	0	0	0	0	0	0	0	0	0	0	0
1700007B14Rik	0	0	0	0	0	0	0	0	0	0	0	0	0	0	0	0	0	0	0	0
1700007F19Rik	0	0	0	0	0	0	0	0	0	0	0	0	0	0	0	0	0	0	0	0
1700007G11Rik	0	0	0	0	0	0	0	0	0	0	0	0	0	0	0.456621	0.591716	0	0	0	0
1700007I08Rik	0	0	0	0	0	0	0	0	0	0	0	0	0	0	0	0	0	0	0	0
1700007J10Rik	0	0	0	0	0	0	0	0	0	0	0	0	0	0	0	0	0	0	0	0
1700007K09Rik	0	0	0	0	0	0	0	0	0	0	0	1.63934	0	0	0	0	0	0	0	0
1700007K13Rik	0	0	0	0.392157	0	0	0	0	1.0101	0	0	0	0	0	0	0	0	0	0	0
1700007L15Rik	4.08163	4.16667	2.66272	9.01961	0.806452	0.351494	1.5625	1.34228	5.05051	21.7778	4.95868	3.27869	5	7.69231	8.21918	10.0592	7.48299	5.45455	0	22.5806
1700007P06Rik	0	0	0	0	0	0	0	0	0	0	0	0	0	0	0	0	0	0	0	0
1700008A04Rik	0	0	0	0	0	0	0	0	0	0	0	0	0	0	0	0	0	0	0	0
1700008F21Rik	0	0	0	0	0	0	0	0	0	0	0	0	0	0	0	0	0	0	0	0
1700008I05Rik	0	0	1.47929	0	0	0	0	0	0	0	0	0	0	0	0	0	0	0	0	0
1700008J07Rik	13.2653	5.95238	6.50888	12.1569	0	0.175747	3.57143	0.671141	9.09091	28	21.4876	14.7541	15.7143	9.23077	4.10959	26.0355	1.36054	9.09091	0.862069	9.67742
1700008K24Rik	0	0	0	0	0	0	0	0	0	0	0	0	0	0	0	0	0	0	0	0
1700008O03Rik	0	0	0.295858	2.7451	0.806452	0.175747	0.669643	0	0	4.88889	0	0	1.42857	0	0	0	0.680272	0	0	0
1700008P02Rik	0	0	0	0	0	0	0	0	0	0	0	0	0	0	0	0	0	0	0	0
1700008P20Rik	0	0	0.295858	0	0	0	0	0	0	0	0	0	0	0	0	0	0	0	0	0
1700009C05Rik	0	0	0	0	0	0	0	0	0	0	0	0	0	0	0	0	0	0	0	0
1700009J07Rik	1.02041	0	0	0	0	0	0	0	0	0	0	0	0	0	0	0	0	0	0	0
1700009N14Rik	0	0	0	0	0	0	0	0	0	0	0	0	0	0	0	0	0	0	0	0
1700009P17Rik	1.02041	2.38095	0	2.35294	0	0.175747	0.669643	0.671141	2.0202	1.77778	0.826446	4.91803	4.28571	1.53846	2.28311	1.77515	2.72109	0	0	0
1700010B08Rik	0	0	0	0	0	0	0	0	0	0	0	0	0	0	0	0	0	0	0	0
1700010D01Rik	0	0	0	0	0	0	0	0	0	0	0	0	0	0	0	0	0	0	0	0
1700010I02Rik	0	0	0	0	0	0	0	0	0	0	0	0	0	0	0	0	0	0	0	0
1700010I14Rik	2.04082	1.19048	4.73373	2.7451	2.41935	2.46046	1.11607	0	0	12	1.65289	1.63934	5	4.61538	1.36986	7.10059	0	0	0	3.22581
1700010J16Rik	0	0	0	0	0	0	0	0	0	0	0	0	0	0	0	0	0	0	0	0
1700010K23Rik	0	0	0	0	0	0	0	0	0	0	0	0	0	0	0	0	0	0	0	0
1700010M22Rik	0	0	0	0	0	0	0	0	0	0	0	0	0	0	0	0	0	0	0	0
1700011A15Rik	0	0	0	0	0	0	0	0	0	0	0	0	0.714286	0	0	0	0	0	0	0
1700011B04Rik	0	0	0	0	0	0	0	0	0	0	0	0	0	0	0	0	0	0	0	0
1700011E24Rik	0	0	0	0	0	0	0	0	0	0	0.826446	0	0	0	0	0	0	0	0	0
1700011F03Rik	0	0	0	0	0	0	0	0	0	0	0	0	0	0	0	0	0	0	0	0
1700011F14Rik	0	0	0	0	0	0	0	0	0	0	0	0	0	0	0	0	0	0	0	0
1700011H14Rik	0	0	0	0	0	0	0	0	0	0	0	0	0	0	0	0	0	0	0	0
1700011I03Rik	0	0	0	0	0	0	0	0	0	0	0	0	0	0	0	0	0	0	0	0
1700011J10Rik	16.3265	13.0952	29.5858	24.7059	25.8065	22.3199	18.75	3.3557	36.3636	40.4444	26.4463	29.5082	29.2857	18.4615	11.8721	38.4615	46.2585	17.2727	18.9655	29.0323
1700011L22Rik	0	0	0	0	0	0	0	0	0	0	0	0	0	0	0	0	0	0	0	0
1700011M02Rik	0	0	0	0	0	0	0	0	0	0	0	0	0	0	0	0	0	0	0	0
1700012A03Rik	0	0	0	0	0	0	0	0	0	0	0	0	0	0	0	0	0	0	0	0
1700012A16Rik	1.02041	0	0	1.56863	0	0.175747	0.669643	0	1.0101	0.888889	0	0	0.714286	0	0	0	0	0.909091	0	0
1700012B07Rik	0	0	0	0	0	0	0	0	0	0	0	0	0	0	0	0	0	0	0	0
1700012B09Rik	0	0	0.295858	15.6863	0	0	0	0	8.08081	10.2222	0	1.63934	0	0	0	0.591716	0	0	0	0
1700012B15Rik	24.4898	11.3095	15.9763	34.902	4.83871	4.39367	16.5179	4.02685	28.2828	41.3333	23.1405	21.3115	35	16.9231	21.9178	30.7692	32.6531	14.5455	6.89655	29.0323
1700012D01Rik	1.02041	1.78571	1.18343	2.7451	0	0.351494	0.669643	0	3.0303	11.1111	0	1.63934	3.57143	0	0	1.77515	0.680272	1.81818	0	9.67742
1700012D14Rik	3.06122	1.78571	1.18343	0.392157	0	0	1.33929	0	1.0101	2.66667	0.826446	1.63934	5	0	0.456621	1.77515	0.680272	0	0.862069	0
1700012I11Rik	0	0	0	0	0	0	0	0	0	0	0	0	0	0	0	0	0	0	0	0
1700012L04Rik	0	0.595238	0.887574	0	0	0.175747	0	0.671141	0	0.888889	0	0	0	0	0	1.18343	0.680272	0	1.72414	3.22581
1700012P22Rik	0	0	0	0	0	0	0	0	0	0	0	0	0	0	0	0	0	0	0	0
1700013D24Rik	0	0	0	0	0	0	0	0	0	0	0	0	0	0	0	0	0	0	0	0
1700013F07Rik	0	0	0	0	0	0	0	0	0	0	0	0	0	0	0	0	0	0	0	0
1700013G23Rik	2.04082	1.19048	1.18343	3.13725	0	0	0	0.671141	1.0101	3.55556	1.65289	1.63934	0.714286	0	0	4.73373	5.44218	0	0	0
1700013G24Rik	0	0	0	0	0	0	0	0	0	0	0	0	0	0	0	0	0	0	0	0
1700013H16Rik	0	0	0	0	0	0	0	0	0	0	0	0	0	0	0	0	0	0	0	0
1700013N18Rik	0	0	0	0	0.806452	0	0	0	0	0	0	0	0	0	0	0	0	0	0	0
1700014N06Rik	0	0	0	0	0	0	0	0	0	0	0	0	0	0	0	0	0	0	0	0
1700015E13Rik	0	0	0	0	0	0	0	0	0	0	0	0	0	0	0	0	0	0	0	0
1700015F17Rik	0	0	0	0	0	0	0	0	0	0	0	0	0	0	0	0	0	0	0	0
1700015G11Rik	0	0	0	0	0	0	0	0	0	0	0	0	0	0	0	0	0	0	0	0
1700016C15Rik	0	0	0	0	0	0	0	0	0	0	0	0	0	0	0	0	0	0	0	0
1700016D06Rik	0	0	0	0	0	0	0	0	0	0	0	0	0	0	0	0	0	0	0	0
1700016G22Rik	0	0	0	0	0	0	0	0	0	0	0	0	0	0	0	0	0	0	0	0
1700016H13Rik	0	0	0	0	0	0	0	0	0	0	0	0	0	0	0	0	0	0	0	0
1700016K19Rik	0	0	0	0	0	0	0	0	0	0	0	0	0.714286	0	0	0	0	0	0	0
1700016L04Rik	0	0	0	0	0	0	0	0	0	0	0	0	0	0	0	0	0	0	0	0
1700016L21Rik	0	0	0	0	0	0	0	0	0	0	0	0	0	0	0	0	0	0	0	0
1700016M24Rik	0	0	0	0	0	0	0	0	0	0	0	0	0	0	0	0	0	0	0	0
1700016P04Rik	0	0	0	0	0	0	0	0	0	0	0	0	0	0	0	0	0	0	0	0
1700017B05Rik	13.2653	1.78571	10.6509	16.4706	0	1.75747	3.125	0.671141	3.0303	24.8889	19.8347	18.0328	30.7143	7.69231	15.9817	23.0769	22.449	3.63636	6.03448	70.9677
1700017D01Rik	0	0	0	0	0	0	0.223214	0	0	0	0	0	0	0	0	0	0	0	0	0
1700017G19Rik	0	0	0	0	0	0	0	0	0	0	0	0	0	0	0	0	0	0	0	0
1700017J07Rik	0	0	0	0	0	0	0	0	0	0.444444	0	0	0	0	0	0	0	0	0	0
1700017N19Rik	0	0	0	0	0	0	0	0	0	0	0	0	0	0	0	0	0	0	0	0
1700018A04Rik	0	0	0	0	0	0	0	0	0	0	0	0	0	0	0	0	0	0	0	0
1700018B08Rik	0	0	0	0	0	0	0	0	0	0	0	0	0	0	0	0	0	0	0	0
1700018B24Rik	0	0	0	0	0	0	0	0	0	0	0	0	0	0	0	0	0	0	0	0
1700018C11Rik	0	0	0	0	0	0	0	0	0	0	0	0	0	0	0	0	0	0	0	0
1700018F24Rik	0	0	0	0	0	0	0	0	0	0	0	0	0	0	0	0	0	0	0	0
1700018G05Rik	0	0	0	0	0	0	0	0	0	0	0	0	0	0	0	0	0	0	0	0
1700018L02Rik	0	0	0.591716	0.392157	0	0.175747	0.223214	0.671141	0	2.22222	1.65289	0	1.42857	0	1.36986	0.591716	0.680272	0	0	0
1700018L24Rik	0	0	0	0	0	0	0	0	0	0	0	0	0	0	0	0	0	0	0	0
1700019A02Rik	0	0	0	0	0	0	0	0	0	0	0	0	0	0	0	0.591716	0	0	0	0
1700019B03Rik	0	0	0	0	0	0	0	0	0	0.444444	0	0	0	0	0	0	0	0	0	0
1700019B21Rik	0	0	0	0	0	0	0	0	0	0	0	0	0	0	0	0	0	0	0	0
1700019D03Rik	0	0.595238	0.591716	0.392157	0	0	0	0	0	0.444444	1.65289	0	1.42857	1.53846	0	0	0	0	0	0
1700019E08Rik	0	0	0	0	0	0	0	0	0	0	0	0	0	0	0	0	0	0	0	0
1700019E19Rik	0	0.595238	0	0	0	0	0.669643	0	1.0101	0.444444	0	3.27869	4.28571	7.69231	0	0	0	0	0	3.22581
1700019G17Rik	0	0	1.18343	1.17647	0	0.175747	0.223214	0	0	0	2.47934	1.63934	0.714286	0	0.456621	1.18343	0.680272	0	0	0
1700019G24Rik	0	0	0	0	0	0	0	0	0	0	0	0	0	0	0	0	0	0	0	0
1700019L03Rik	0	0	0	0	0	0	0	0	0	0.444444	0	0	0	0	0	0	0	0	0	0
1700019M22Rik	0	0	0	0	0	0	0	0	0	0	0	0	0	0	0	0	0	0	0	0
1700019N12Rik	0	0	0	0	0	0	0	0	0	1.33333	0	0	0	0	0	0	0	0	0	0
1700019N19Rik	0	0	0	0	0	0	0	0	0	0	0	0	0	0	0	0	0	0	0	0
1700019O17Rik	0	0	0	0	0	0	0	0	0	0	0	0	0	0	0	0	0	0	0	0
1700020A23Rik	0	0	0	0	0	0	0	0	0	0	0	0	0	0	0	0	0	0	0	0
1700020D05Rik	0	0	0.295858	0.392157	0	0.175747	0.223214	0	0	0.444444	0	1.63934	0	0	0.456621	0	0	0	0	0
1700020G17Rik	0	0	0	0	0	0	0	0	0	0	0	0	0	0	0	0	0	0	0	0
1700020I14Rik	46.9388	32.1429	51.7751	53.7255	22.5806	25.8348	32.1429	65.1007	55.5556	68	52.0661	54.0984	51.4286	35.3846	26.9406	53.8462	73.4694	20.9091	60.3448	48.3871
1700020L24Rik	9.18367	5.35714	92.6036	53.7255	5.64516	28.6467	7.8125	6.71141	46.4646	88.8889	4.95868	52.459	12.8571	7.69231	4.10959	5.32544	2.04082	1.81818	5.17241	3.22581
1700020M21Rik	0	0	0	0	0	0	0	0	0	0	0	0	0	0	0	0	0	0	0	0
1700020N01Rik	0	0	0	0	0	0	0	0	0	0	0	0	0	0	0	0	0	0	0	0
1700020N15Rik	0	0	0	0	0	0	0	0	0	0	0	0	0	0	0	0	0	0	0	0
1700020N18Rik	1.02041	0	0.295858	0	0	0	0	0	0	0	0.826446	0	0	0	0	0.591716	0.680272	0	0	3.22581
1700020O03Rik	7.14286	1.19048	9.76331	6.66667	2.41935	3.33919	3.57143	0	8.08081	16	6.61157	3.27869	9.28571	3.07692	2.73973	5.32544	3.40136	2.72727	0	6.45161
1700021C14Rik	5.10204	3.57143	0.887574	5.4902	0	0.702988	1.78571	0	4.0404	25.7778	1.65289	8.19672	16.4286	1.53846	3.65297	10.0592	4.7619	2.72727	0	0
1700021F05Rik	15.3061	7.14286	17.1598	34.1176	1.6129	1.58172	12.2768	3.3557	46.4646	44.8889	18.1818	14.7541	25.7143	4.61538	10.9589	33.1361	23.1293	5.45455	0.862069	16.129
1700021F07Rik	0	0	0	0	0	0	0	0	0	0	0	0	0	0	0	0	0	0	0	0
1700021K19Rik	13.2653	1.19048	2.07101	10.1961	0	1.05448	5.13393	0	8.08081	7.55556	9.09091	0	11.4286	1.53846	10.9589	5.32544	3.40136	10	0.862069	3.22581
1700021N21Rik	0	0	0	0	0	0	0	0	0	0.444444	0	0	0	0	0	0	0	0	0	0
1700022A21Rik	0	0	0	0	0	0	0	0	0	0	0	0	0	0	0	0	0	0	0	0
1700022A22Rik	0	0	0	0	0	0	0	0	0	0	0	0	0	0	0	0	0	0	0	0
1700022E09Rik	0	0	0	0	0	0	0	0	0	0	0	0	0	0	0	0	0	0	0	0
1700022H16Rik	0	0	0	0	0	0	0	0	0	0	0	0	0	0	0	0	0	0	0	0
1700022I11Rik	0	0	0	0	0	0	0	0	0	0	0	0	0	0	0	0	0	0	0	0
1700022P22Rik	0	0	0	0	0	0	0	0	0	0	0	0	0	0	0	0	0	0	0	0
1700023A16Rik	0	0	0	0	0	0	0	0	0	0	0	0	0	0	0	0	0.680272	0	0	0
1700023C21Rik	0	0	0	0	0	0	0	0	0	0	0	0	0	0	0	0	0	0	0	0
1700023E05Rik	0	0	0	0	0	0	0	0	0	0	0	0	0	0	0	0	0	0	0	0
1700023F02Rik	0	0	0	0	0	0	0	0	0	0	0	0	0	0	0	0	0	0	0	0
1700023F06Rik	0	0	0	0	0	0	0	0	0	0	0	0	0.714286	0	0	0	0	0	0	3.22581
1700023L04Rik	0	0	2.36686	0.784314	0	0.175747	0	0	0	7.55556	0	1.63934	0	0	0.456621	0	0	0	0	0
1700024B18Rik	0	0	0	0	0	0	0	0	0	0	0	0	0	0	0	0	0	0	0	0
1700024F13Rik	0	0	0	0	0	0	0	0	0	0.444444	0.826446	0	0.714286	0	0	0.591716	0	0	0	0
1700024G13Rik	0	0	0	0	0	0	0	0	0	0	0	0	0	0	0	0	0	0	0	0
1700024P03Rik	0	0	0	0	0	0	0	0	0	0	0	0	0	0	0	0	0	0	0	0
1700024P04Rik	0	0	0	0	0	0	0	0	0	0	0	0	0	0	0	0	0	0	0	0
1700024P16Rik	9.18367	0	0	0	0	0	0	0	0	0	0	0	2.85714	0	15.0685	0	0.680272	0	0	0
1700025B11Rik	0	0	0	0	0	0	0	0	0	0	0	0	0	0	0	0	0	0	0	0
1700025C18Rik	0	0	0	0	0	0	0	0	0	0	0	0	0	0	0	0	0	0	0	0
1700025E21Rik	0	0	0	0.392157	0	0	0	0.671141	0	0	0.826446	0	0	0	0	0	1.36054	0	2.58621	0
1700025F22Rik	0	0	0	0	0	0	0	0	0	0	0	0	0	0	0	0	0	0	0	0
1700025F24Rik	0	0	0	0	0	0	0	0	0	0	0	0	0	0	0	0	0	0	0	0
1700025G04Rik	58.1633	38.6905	12.7219	49.8039	0	0.878735	23.4375	1.34228	57.5758	25.3333	8.26446	4.91803	42.1429	1.53846	5.47945	18.9349	0	0.909091	1.72414	3.22581
1700025K23Rik	0	0	0	2.35294	0	0.175747	0.446429	0	2.0202	6.66667	0	0	4.28571	1.53846	0.913242	2.95858	0	0	0	0
1700025K24Rik	0	0	0	0	0	0	0	0	0	0	0	0	0	0	0	0	0	0	0	0
1700025M24Rik	0	0	0	0	0	0	0	0	0	0	0	0	0	0	0	0	0	0	0	0
1700025N23Rik	0	0	0	0	0	0	0	0	0	0	0	0	0	0	0	0	0	0	0	0
1700026D08Rik	0	0	0	0	0	0	0	0	0	0	0	0	0	0	0	0	0	0	0	0
1700026D11Rik	0	0	0	0.392157	0	0	0	0	0	0	0	0	0	0	0	0	0	0	0	0
1700026F02Rik	0	0	0	0	0	0	0	0	0	0	0	0	0	0	0	0	0	0	0	0
1700026J04Rik	0	0.595238	0	0	0	0	0	0	0	0	0	0	0	0	0	0	0	0	0	0
1700026L06Rik	25.5102	2.97619	6.21302	31.3725	0	1.05448	7.58929	0	46.4646	5.77778	3.30579	4.91803	5.71429	0	10.5023	0.591716	0.680272	6.36364	0	6.45161
1700027A15Rik	0	0	0	0	0	0	0	0	0	0	0	0	0	0	0	0	0	0	0	0
1700027A23Rik	0	0	0	0	0	0	0	0	0	0.444444	0	0	0.714286	0	1.36986	0	0	0.909091	0	0
1700027D21Rik	0	0	0	0	0	0	0	0	0	0	0	0	0	0	0.456621	0	0	0	0	0
1700027F09Rik	0	0	0	0	0	0	0	0	0	0	0	0	0	0	0	0	0	0	0	0
1700027H10Rik	0	0	0	0	0	0	0	0	0	0	0	0	0	0	0	0	0	0	0	0
1700027I24Rik	0	0	0	0	0	0	0	0	0	0	0	0	0	0	0	0	0	0	0	0
1700027J07Rik	0	0	0	0	0	0	0	0	0	0	4.13223	0	0	13.8462	0	8.28402	0	0	0	0
1700028B04Rik	0	0	0	0	0	0	0	0	0	0	0	0	0	1.53846	0	0	0	0	0	0
1700028D13Rik	0	0	0	0	0	0	0	0	0	0	0	0	0	0	0	0	0	0	0	0
1700028E10Rik	1.02041	1.19048	1.18343	1.56863	0	0.175747	0.669643	0	0	1.77778	0.826446	1.63934	2.14286	1.53846	1.36986	1.77515	3.40136	1.81818	0	0
1700028I16Rik	0	0	0.295858	0	0	0	0	0	0	0	0	0	0	0	0	0	0	0	0	0
1700028J19Rik	4.08163	0	1.18343	3.92157	0	0.351494	0.892857	0	1.0101	2.22222	0.826446	0	2.14286	0	0	1.18343	4.08163	0	0	0
1700028K03Rik	0	0	0	0	0	0	0	0	0	0	0	0	0	0	0	0	0	0	3.44828	0
1700028M03Rik	0	0	0	0	0	0	0	0	0	0	0	0	0	0	0	0	0	0	0	0
1700028P14Rik	0	0	0	0	0	0	0	0	0	0	0	0	0	0	0	0	0	0	0	0
1700028P15Rik	0	0	0	0	0	0	0	0	0	0	0	0	0	0	0	0	0	0	0	0
1700029B22Rik	0	0	0	0	0	0	0	0	0	0	0	0	0	0	0	0	0	0	0	0
1700029F09Rik	25.5102	7.14286	33.7278	37.6471	0	3.33919	6.47321	2.01342	46.4646	72	75.2066	32.7869	42.1429	20	8.6758	65.6805	36.0544	9.09091	0	48.3871
1700029F12Rik	0	0	0	0	0	0	0	0	0	0	0	0	0	0	0	0	0	0	0	0
1700029G01Rik	2.04082	0.595238	0	0.784314	0	0.175747	0.223214	0	0	0.444444	1.65289	0	2.14286	0	0.456621	1.18343	0	0	0	3.22581
1700029H14Rik	1.02041	0	0	0	0	0	0.223214	0	0	0	0	0	0	1.53846	0	0	0	0	0	0
1700029I01Rik	6.12245	0	5.91716	10.1961	1.6129	1.23023	5.35714	0	11.1111	14.2222	1.65289	3.27869	7.85714	1.53846	2.73973	7.69231	4.08163	0.909091	0.862069	0
1700029I15Rik	1.02041	0	0.295858	0.784314	0	0	0	0	1.0101	0.444444	0	0	0	0	0	1.18343	0	0	0	0
1700029J03Rik	0	0	0	0	0	0	0	0	0	0	0	0	0	0	0	0	0	0	0	0
1700029J07Rik	0	0.595238	0.295858	2.7451	0	0.175747	0	0	1.0101	4	3.30579	1.63934	2.14286	1.53846	1.82648	4.14201	1.36054	0	0	3.22581
1700029J11Rik	0	0	0.295858	0	0	0.351494	0	0	0	0.888889	0	1.63934	1.42857	0	0	1.18343	0	0	0	0
1700029M20Rik	0	0	0	0	0	0	0	0	0	0	0	0	0	0	0	0	0	0	0	0
1700029N11Rik	0	0	0	0	0	0	0	0	0	0	0	0	0	0	0	0	0	0	0	0
1700029P11Rik	0	0	0.295858	0	0	0	0	0	0	0	0	0	0	0	0	0	0	0	0	0
1700030A11Rik	0	0	0	0	0	0	0	0	0	0	0	0	0	0	0	0	0	0	0	0
1700030C10Rik	3.06122	1.19048	0.887574	0	0	0.175747	0.669643	0.671141	0	1.77778	0.826446	0	1.42857	1.53846	0	2.95858	0.680272	0	0	0
1700030F04Rik	0	0	0	0	0	0	0	0	0	0	0	0	0	0	0	0	0	0	0	0
1700030F18Rik	0	0	0	0	0	0	0	0	0	0	0	0	0	0	0	0	0	0	0	0
1700030J22Rik	0	0	0	1.56863	0	0	0.446429	0	0	0	0	0	0	1.53846	0	0.591716	1.36054	0	0	0
1700030K09Rik	3.06122	0.595238	1.77515	3.13725	0	0	1.33929	0	1.0101	7.11111	4.13223	0	7.14286	16.9231	1.36986	15.9763	2.04082	2.72727	0	3.22581
1700030L20Rik	0	0	0	0	0	0	0	0	0	0	0	0	0	0	0	0	0	0	0	0
1700030M09Rik	0	0	0	0	0	0	0	0	0	0	0	0	0	0	0	0	0	0	0	0
1700030N03Rik	0	0	0	0	0	0	0	0	0	0	0	0	0	0	0	0	0	0	0	0
1700030O20Rik	0	0	0	0	0	0	0	0	0	0	0	0	0	0	0	0	0	0	0	0
1700031A10Rik	0	0	0	0	0	0	0	0	0	0	0	0	0	0	0	0	0	0	0	0
1700031F05Rik	0	0	0	0	0	0	0	0	0	0	0	0	0	0	0	0	0	0	0	0
1700031M16Rik	0	0	0	0	0	0	0	0	0	0	0	0	0	0	0	0	0	0	0	0
1700031P21Rik	0	0	0	0	0	0	0	0	0	0	0	0	0	0	0	0	0	0	0	0
1700034E13Rik	0	0	0	0	0	0	0	0	0	0	0	0	0	0	0	0	0	0	0	0
1700034F02Rik	0	0	0	0.784314	0	0	0	0	0	0	0	0	0	0	0	0.591716	0.680272	0	0	0
1700034G24Rik	0	0	0	0	0	0	0	0	0	0	0	0	0	0	0	0	0	0	0	0
1700034H14Rik	20.4082	9.52381	12.1302	33.3333	0	3.33919	10.7143	4.69799	33.3333	58.2222	24.7934	19.6721	38.5714	27.6923	8.6758	33.1361	25.1701	11.8182	3.44828	19.3548
1700034H15Rik	0	0	0	0	0	0	0.223214	0	0	0	0	0	0	0	0	0	0.680272	0	0	0
1700034I23Rik	0	0	0	0	0	0	0	0	0	0	0	0	0	0	0	0	0	0	0	0
1700034J05Rik	0	0	0	0	0	0	0	0	0	0	0	0	0	0	0	0	0	0	0	0
1700034K08Rik	0	0	0	0	0	0	0	0	0	0	0	0	0	0	0	0	0	0	0	0
1700034O15Rik	0	0	0	0	0	0	0	0	0	0	0	0	0	0	0	0	0	0	0	0
1700034P13Rik	0	0	0.295858	0.392157	0	0.175747	0.223214	0.671141	0	2.66667	0	0	0.714286	0	0.456621	0	0.680272	0	0	3.22581
1700036G14Rik	0	0	0	0	0	0	0	0	0	0	0	0	0	0	0	0	0	0	0	0
1700037C18Rik	4.08163	5.35714	4.43787	2.7451	0	1.05448	1.5625	1.34228	6.06061	12.8889	7.43802	0	5	6.15385	6.39269	13.0178	8.16327	0.909091	1.72414	3.22581
1700037H04Rik	8.16327	10.7143	60.0592	29.4118	4.03226	19.3322	12.9464	19.4631	26.2626	75.5556	25.6198	27.8689	35	16.9231	5.93607	31.9527	74.8299	6.36364	31.0345	3.22581
1700039E15Rik	0	0	0	0	0	0	0	0	0	0	0	0	0	0	0	0	0	0	0	0
1700039E22Rik	0	0	0	0	0	0	0	0	0	0	0	0	0	0	0	0	0	0	0	0
1700040I03Rik	22.449	5.35714	30.1775	40.7843	4.83871	2.6362	8.03571	0.671141	37.3737	52.8889	35.5372	16.3934	28.5714	3.07692	7.30594	37.2781	30.6122	3.63636	0.862069	12.9032
1700040L02Rik	0	0	0	0.392157	0	0	0	0	0	2.66667	0.826446	0	4.28571	0	0	1.77515	0.680272	0	0	3.22581
1700040N02Rik	0	0	0	0	0	0	0	0	0	1.33333	0	0	0	0	0	0	0	0	0	0
1700041C23Rik	0	0	0	0	0	0	0	0	0	0	0	0	0	0	0	0	0	0	0	0
1700041M19Rik	0	0	0	0	0	0	0	0	0	0	0	0	0	0	0	0	0	0	0	0
1700042B14Rik	0	0	0	0	0	0	0	0	0	0	0	0	0	0	0	0	0	0	0	0
1700042G07Rik	0	0	0	0	0	0	0	0	0	0	0	0	0	0	0	0	0	0	0	0
1700042G15Rik	0	0	0	0	0	0	0	0	0	0	0	0	0	0	0	0	0	0	0	0
1700042O10Rik	0	0.595238	0.295858	0	0	0	0	0	0	0	0.826446	0	0	0	0	0.591716	0	0	0	0
1700044C05Rik	0	0	0	0	0	0	0	0	0	0	0	0	0	0	0	0	0	0	0	0
1700044K03Rik	0	0	0	0	0	0	0	0	0	0	0	0	0	0	0	0	0	0	0	0
1700045H11Rik	0	0	0	0	0	0	0	0	0	0	0	0	0	0	0	0	0	0	0	0
1700045I19Rik	0	0	0.887574	0.784314	0	0.351494	0.223214	0	0	0	0	0	0	0	0	0.591716	0	0	0	0
1700046C09Rik	0	0	0	0	0	0	0	0	0	0	0	0	0	0	0	0	0	0	0	0
1700047G03Rik	0	0	0	0	0	0	0	0	0	0	0	0	0	0	0	0	0	0	0	0
1700047I17Rik2	0	0	0	0	0	0	0	0	0	0	0	0	0	0	0	0	0	0	0	0
1700047L14Rik	0	0	0	0	0	0	0	0	0	0	0	0	0	0	0	0	0	0	0	0
1700047M11Rik	1.02041	0.595238	17.7515	0.392157	26.6129	38.3128	2.67857	1.34228	1.0101	1.33333	0	0	1.42857	0	0.456621	1.18343	0.680272	2.72727	0	3.22581
1700048M11Rik	0	0	0	0	0	0	0	0	0	0	0	0	0	0	0	0	0	0	0	0
1700048O20Rik	2.04082	0	0	3.13725	0	0.175747	0.223214	0	3.0303	2.66667	3.30579	1.63934	4.28571	49.2308	1.36986	11.8343	2.04082	2.72727	0	0
1700049E15Rik	0	0	0	0	0	0	0	0	0	0	0	0	0	0	0	0	0	0	0	0
1700049E22Rik	0	0	0	0	0	0	0	0	0	0	0	0	0	0	0	0	0	0	0	0
1700049G17Rik	0	0	0.295858	0.784314	0	0	1.11607	0	1.0101	1.77778	2.47934	1.63934	2.14286	0	1.36986	1.18343	0.680272	1.81818	0.862069	0
1700049L16Rik	0	0	0	0	0	0	0	0	0	0	0	0	0	0	0	0	0	0	0	0
1700051A21Rik	0	0	0	0	0	0	0	0	0	0	0	0	0	0	0	0	0	0	0	0
1700052I22Rik	0	0	0	0	0	0	0	0	0	0	0	0	0	0	0	0	0	0	0	0
1700052K11Rik	3.06122	2.97619	5.91716	7.05882	0	1.75747	2.23214	0	4.0404	16	8.26446	6.55738	10.7143	10.7692	5.93607	11.2426	9.52381	2.72727	0	9.67742
1700052N19Rik	14.2857	4.16667	18.9349	18.4314	4.83871	2.28471	5.13393	2.01342	17.1717	35.5556	26.4463	9.83607	19.2857	12.3077	3.65297	21.8935	25.1701	6.36364	3.44828	9.67742
1700054A03Rik	0	0	0	0	0	0	0	0	0	0	0	0	0	0	0	0	0	0	0	0
1700054K19Rik	0	0	0	0	0	0	0	0	0	0	0	0	0	0	0	0	0	0	0	0
1700054M17Rik	0	0	0.295858	0	0	0	0	0	0	0	0	0	0	0	0	0	0	0	0	0
1700054N08Rik	12.2449	4.7619	9.76331	7.84314	0	0.527241	0	0	24.2424	12.4444	18.1818	9.83607	9.28571	0	0.456621	13.0178	23.8095	0.909091	0	0
1700054O13Rik	0	0	0	0	0	0	0	0	0	0	0	0	0	0	0	0	0	0	0	0
1700055C04Rik	0	0	0	0	0	0	0	0	0	0	0	0	0	0	0	0	0	0	0	0
1700055N04Rik	0	0	4.43787	0.392157	0	3.33919	0	0.671141	0	0.444444	0	0	0	0	0	0	0	0	0	0
1700056E22Rik	7.14286	4.16667	0.591716	5.4902	0	0	2.45536	0	4.0404	1.33333	6.61157	3.27869	7.85714	0	5.47945	5.91716	2.72109	0.909091	0	0
1700057G04Rik	0	0	0	0	0	0	0	0	0	0	0	0	0	0	0	0	0	0	0	0
1700057H15Rik	0	0	0	0	0	0	0	0	0	0	0	0	0	0	0	0	0	0	0	0
1700057K13Rik	0	0	0	0	0	0	0	0	0	0	0	0	0	0	0	0	0	0	0	3.22581
1700058G18Rik	0	0	0	0	0	0	0	0	0	0	0	0	0	0	0	0	0	0	0	0
1700060C16Rik	0	0	0	0	0	0	0	0	0	0	0	0	0	0	0	0	0	0	0	0
1700060C20Rik	0	0	0	0	0	0	0	0	0	0	0	0	0.714286	0	0	0	0	0	0	0
1700061F12Rik	0	0	0	0	0	0	0	0	0	0	0	0	0	0	0	0	0	0	0	0
1700061G19Rik	1.02041	0	2.36686	2.35294	0	1.23023	0.892857	0	1.0101	2.22222	0	0	2.14286	1.53846	0	0	0	0.909091	0	0
1700061I17Rik	0	0	0	0	0	0	0	0	0	0	0	0	0	0	0	0	0	0	0	0
1700061J05Rik	0	0	0	0	0	0	0	0	0	0	0	0	0	0	0	0	0	0	0	0
1700063A18Rik	0	0	0	0	0	0	0	0	0	0	0	0	0	0	0	0	0	0	0	0
1700063D05Rik	0	0	0	0	0	0	0	0	0	0	0	0	0	0	0	0	0	0	0	0
1700063O14Rik	0	0	0	0	0	0	0	0	0	0	0	0	0	0	0	0	0	0	0	0
1700064J06Rik	0	0	0	0	0	0	0	0	0	0	0	0	0	0	0	0	0	0	0	0
1700064M15Rik	2.04082	0	0	0	0	0	0	0	0	0	0	0	0	0	0	0	0	0	0	3.22581
1700065D16Rik	2.04082	0.595238	0	3.52941	0	0	0.223214	0	2.0202	2.66667	3.30579	0	10	1.53846	0.913242	1.18343	0.680272	0.909091	0	3.22581
1700065I16Rik	0	0	0	0	0	0	0	0	0	0	0	0	0	0	0	0	0	0	0	0
1700065I17Rik	0	0	0	0	0	0	0	0	0	0	0	0	0	0	0	0	0	0	0	0
1700065J11Rik	0	0	0	0	0	0	0	0	0	0	0	0	0	0	0	0	0	0	0	0
1700065J18Rik	0	0	0	0	0	0	0	0	0	0	0	0	0	0	0	0	0	0	0	0
1700065O20Rik	0	0	0	0	0	0	0	0	0	0	0	0	0	0	0	0	0	0	0	0
1700066B17Rik	0	0	0	0	0	0	0.223214	0	0	0	0	0	0	0	0	0	0	0	0	0
1700066B19Rik	0	1.19048	2.36686	2.35294	0.806452	0.175747	0	0	0	7.11111	0	1.63934	2.14286	0	0.913242	1.77515	0.680272	0.909091	0.862069	3.22581
1700066J24Rik	0	0	0	0	0	0	0	0	0	0	0	0	0	0	0	0	0	0	0	0
1700066M21Rik	7.14286	0.595238	10.0592	5.88235	0	0.702988	2.23214	0	20.202	12.8889	4.95868	3.27869	6.42857	1.53846	0.913242	5.32544	7.48299	0	0	0
1700066N21Rik	0	0	0	0	0	0	0	0	0	0	0	0	0	0	0	0	0	0	0	0
1700066O22Rik	0	0	0	0	0	0	0	0	0	0	0	0	0	0	0	0	0	0	0	0
1700067G17Rik	0	0	0	0	0	0	0	0	0	0	0	0	0	0	0.456621	0.591716	0	0	0	0
1700067K01Rik	0	0	0	0	0	0	0	0	0	0.444444	0.826446	0	0	0	0	0.591716	0.680272	0.909091	0	0
1700067P10Rik	0	0	0	0	0	0	0	0	0	0	0	0	0	0	0	0	0	0	0	0
1700069L16Rik	0	0	0	0	0	0	0	0	0	0	0	0	0	0	0	0	0	0	0	0
1700069P05Rik	0	0	0	0	0	0	0	0	0	0	0	0	0	0	0	0	0	0	0	0
1700071K01Rik	0	0	0	0	0	0	0	0	0	0	0	0	0	0	0	0	0	0	0	0
1700071M16Rik	0	0.595238	0.295858	0	0.806452	0	0.223214	0	0	0	0.826446	0	0	0	0	0	0	0	0	0
1700072B07Rik	0	0	0	0	0	0	0	0	0	0	0	0	0	0	0	0	0	0	0	0
1700072O05Rik	0	0	0	0	0	0	0	0	0	0	0	0	0	6.15385	0	0.591716	0	0	0	0
1700073E17Rik	0	0	0	0	0	0	0.223214	0	0	0	0	0	0.714286	0	0	0.591716	0	0	0	0
1700074H08Rik	0	0	0	0	0	0	0	0	0	0	0	0	0	0	0	0	0	0	0	0
1700074P13Rik	0	0	0	0	0	0	0	0	0	0	0	0	0	0	0	0	0	0	0	0
1700080E11Rik	0	0	0	0	0	0	0	0	0	0	0	0	0	0	0	0	0	0	0	0
1700080N15Rik	0	0	0	0	0	0	0	0	0	0	0	0	0	0	0	0	0	0	0	0
1700080O16Rik	0	0	0	0	0	0	0	0	0	0	0	0	0	0	0	0	0	0	0	0
1700081H04Rik	0	0	0	0	0	0	0	0	0	0	0	0	0	0	0	0	0	0	0	0
1700081H22Rik	0	0	0	0	0	0	0	0	0	0	0	0	0	0	0	0	0	0	0	0
1700081L11Rik	36.7347	28.5714	20.7101	41.5686	4.03226	10.8963	29.0179	3.3557	48.4848	45.7778	38.843	24.5902	42.8571	27.6923	28.7671	46.7456	26.5306	23.6364	8.62069	29.0323
1700084C01Rik	0	0	0	0	0	0	0	0	0	0	0.826446	0	0	0	0	0	0	0	0	0
1700084E18Rik	2.04082	0	0.591716	1.17647	0	0.175747	0.446429	0	1.0101	3.11111	0.826446	3.27869	3.57143	0	0.913242	3.5503	2.04082	0	0	0
1700084F23Rik	0	0	0	0	0	0	0	0	0	0	0	0	0	0	0	0	0	0	0	0
1700084J12Rik	0	0	0	0	0	0	0	0	0	0	0	0	0	0	0	0	0	0	0	0
1700085B03Rik	0	0	0	0	0	0	0	0	0	0	0	0	0	0	0	0	0	0	0	0
1700085C21Rik	0	0	0	0	0	0	0	0	0	0	0	0	0	0	0	0	0	0	0	0
1700086L19Rik	0	0	0	0	0	0	0	0	0	0	0	0	0	0	0	0	0	0	0	0
1700086O06Rik	2.04082	1.19048	0.887574	2.7451	0	0	1.11607	1.34228	2.0202	9.33333	0	1.63934	2.85714	4.61538	0	6.50888	30.6122	0	7.75862	0
1700088E04Rik	0	0	0	0	0	0	0	0	0	0	0	0	0	0	0	0	0	0	0	0
1700090G07Rik	0	0	0	0	0	0	0	0	0	0	0	0	0	0	0	0	0	0	0	0
1700091E21Rik	0	0	0	0	0	0	0	0	0	0	0	0	0	0	0	0	0	0	0	0
1700092C02Rik	0	0	0	0	0	0	0	0	0	0	0	0	0	0	0	0	0	0	0	0
1700092C10Rik	0	0	0	0	0	0	0	0	0	0	0	0	0	0	0	0	0	0	0	0
1700092E19Rik	0	0	0	0	0	0	0	0	0	0	0	0	0	0	0	0	0	0	0	0
1700092K14Rik	0	0	0	0	0	0	0	0	0	0	0	0	0	0	0	0	0	0	0	0
1700092M07Rik	0	0	0	0	0	0	0	0	0	0.888889	0	0	0.714286	0	0	1.18343	2.04082	0	0	0
1700093K21Rik	0	0	0	0	0	0	0	0	0	0	0	0	0	0	0	0	0	0	0	0
1700094D03Rik	4.08163	2.38095	2.36686	5.4902	0.806452	1.05448	2.45536	0.671141	3.0303	12.4444	2.47934	3.27869	5.71429	1.53846	2.28311	8.28402	4.7619	4.54545	0	0
1700094J05Rik	0	0	0	0	0	0	0	0	0	0	0	0	0	0	0	0	0	0	0	0
1700094M24Rik	0	0	0	0	0	0	0	0	0	0	0	0	0	0	0	0	0	0	0	0
1700095A21Rik	0	0	0	0	0	0	0	0	0	0	0	0	0	0	0	0	0	0	0	0
1700095B10Rik	0	0	0	0	0	0	0	0	0	0	0	0	0	0	0	0	0	0	0	0
1700095B22Rik	0	0	0	0	0	0	0	0	0	0	0	0	0	0	0	0	0	0	0	0
1700096J18Rik	0	0	0	0	0	0	0	0	0	0	0	0	0	0	0	0	0	0	0	0
1700096K18Rik	15.3061	7.14286	10.9467	14.5098	5.64516	10.1933	9.82143	0.671141	18.1818	17.3333	7.43802	16.3934	22.8571	12.3077	15.0685	11.8343	9.52381	3.63636	1.72414	3.22581
1700097N02Rik	37.7551	5.95238	22.7811	40	0.806452	3.16344	3.34821	2.01342	38.3838	43.1111	45.4545	32.7869	39.2857	15.3846	12.3288	46.1538	6.80272	3.63636	0.862069	0
1700100L14Rik	0	0	0	0	0	0	0	0	0	0	0	0	0	0	0	0	0	0	0	0
1700101E01Rik	0	0	0	0	0	0	0	0	0	0	0	0	0	0	0	0.591716	0.680272	0	0	0
1700101I11Rik	1.02041	0	0	0	0	0.175747	0	0	1.0101	0.444444	0.826446	0	2.14286	4.61538	0	0	0	0	0.862069	0
1700101O22Rik	0	0	0	0	0	0	0	0	0	0	0	0	0	0	0	0	0	0	0	0
1700102H20Rik	0	1.19048	0.887574	3.52941	0	0	0.446429	0	1.0101	7.11111	2.47934	8.19672	7.85714	1.53846	0.456621	7.69231	2.04082	0.909091	0	0
1700102P08Rik	0	1.19048	0.295858	0	0.806452	0	0	0	0	0.444444	0	0	0	0	0	0.591716	2.04082	0	0.862069	0
1700104A03Rik	0	0	0	0	0	0	0	0	0	0	0	0	0	0	0	0	0	0	0	0
1700105P06Rik	0	0	0	1.56863	0	0	0	0	0	0.444444	0	0	1.42857	1.53846	0	0	0	0	0	3.22581
1700106J16Rik	0	0	0	0	0	0	0	0	0	0	0	0	0	0	0	0	0	0	0	0
1700106N22Rik	7.14286	2.38095	0.887574	3.13725	0.806452	0	2.23214	0	6.06061	9.77778	1.65289	1.63934	8.57143	0	5.47945	1.18343	2.72109	1.81818	0.862069	3.22581
1700108F19Rik	0	0	0	0	0	0	0	0	0	0	0	0	0	0	0.913242	0	0	0	0	0
1700108J01Rik	0	0	0	0	0	0	0	0	0	0	0	0	0	0	0	0	0	0	0	0
1700108M19Rik	0	0	0.295858	0.392157	0	0	0	0	0	0	0	0	0	1.53846	0.456621	0	0	0	0	0
1700109F18Rik	0	0	0	0	0	0	0	0	0	0	0	0	0	0	0	0	0	0	0	0
1700109G14Rik	0	0	0	0	0	0	0	0	0	0	0	0	0	0	0	0	0	0	0	0
1700109G15Rik	0	0	0	0	0	0	0	0	0	0	0	0	0	0	0	0	0	0	0	0
1700109H08Rik	1.02041	1.19048	0.295858	0.784314	0	0	0.223214	0	0	0	0.826446	1.63934	1.42857	1.53846	1.36986	1.77515	2.04082	0	0.862069	0
1700109I08Rik	0	0	0	0	0	0	0	0	0	0	0	0	0	0	0	0	0	0	0	0
1700110C19Rik	1.02041	0	0	0	0	0	0	0	0	0	0	0	0	0	0	0	0	0	0	0
1700110I01Rik	0	0	0	0	0	0	0	0	0	0	0	0	0	0	0	0	0	0	0	0
1700110K17Rik	0	0	0	0	0	0	0	0	0	0	0	0	0	0	0	0	0	0	0	0
1700110M21Rik	0	0	0	0	0	0	0	0	0	0	0	0	0	0	0	0	0	0	0	0
1700111N16Rik	0	0	0	0	0	0	0	0	0	0	0	0	0	0	0	0	0	0	0	0
1700112E06Rik	2.04082	0	15.6805	21.5686	4.03226	2.6362	6.91964	0.671141	29.2929	41.7778	1.65289	13.1148	15	0	0	1.18343	4.08163	0.909091	0	0
1700112H15Rik	0	0	0	0	0	0	0	0	0	0	0	0	0	0	0	0	0	0	0	0
1700113A16Rik	4.08163	2.38095	2.95858	3.92157	0	0.878735	0.892857	0.671141	3.0303	9.77778	0.826446	1.63934	7.14286	3.07692	1.36986	4.14201	1.36054	2.72727	0	6.45161
1700113H08Rik	0	1.19048	0	0	0	0	0	0	0	0	0	0	0	0	0	0	0	0	0	0
1700113I22Rik	0	0	0	2.35294	0	0	0.223214	0	4.0404	2.66667	0	0	1.42857	0	0.456621	1.18343	0	0	0	0
1700119H24Rik	0	0	0	0	0	0	0	0	0	0	0	0	0	0	0	0	0	0	0	0
1700120C14Rik	0	0	0	2.35294	0	0.351494	0.223214	1.34228	0	4	7.43802	1.63934	2.14286	0	1.36986	8.28402	3.40136	0	0.862069	0
1700120E14Rik	0	0	0	0	0	0	0	0	0	0	0	0	0	0	0	0	0	0	0	0
1700120G07Rik	0	0	0	0	0	0	0	0	0	0	0	0	0	0	0	0	0	0	0	0
1700120K04Rik	0	0	0	0	0	0	0	0	0	0	0	0	0	0	0	0	0	0	0	0
1700121L16Rik	0	0	0	0	0	0	0	0	0	0	0	0	0	0	0	0	0	0	0	0
1700121N20Rik	0	0	0	0	0	0	0	0	0	0	0	0	0	0	0	0	0	0	0	0
1700122O11Rik	0	0	0	0	0	0	0	0	0	0	0	0	0	0	0	0	0	0	0	0
1700123I01Rik	0	0	0	0	0	0	0	0	0	0	0	0	0	0	0	0	0	0	0	0
1700123K08Rik	0	0	0	0	0	0	0	0	0	0	0	0	0	0	0	0	0	0	0	0
1700123L14Rik	0	0	0	0	0	0	0	0	0	0	0	0	0	0	0	0	0	0	0	0
1700123M08Rik	2.04082	1.78571	0.295858	1.96078	0	0	0	0	0	4	2.47934	3.27869	7.14286	0	1.36986	1.77515	2.04082	0	0	3.22581
1700123O12Rik	0	0	0	0	0	0	0	0	0	0	0	0	0	0	0	0	0	0	0	0
1700123O20Rik	50	19.6429	68.6391	57.6471	18.5484	33.7434	35.7143	8.72483	59.596	88.4444	54.5455	44.2623	51.4286	33.8462	23.7443	54.4379	51.0204	20.9091	25	45.1613
1700123O21Rik	0	0	0	0	0	0	0	0	0	0	0	0	0	0	0	0	0	0	0	0
1700125D06Rik	0	0	0	0	0	0	0	0	0	0	0	0	0	0	0	0	0.680272	0	1.72414	0
1700125G02Rik	0	0	0	0	0	0	0	0	0	0	0	0	0	0	0	0	0	0	0	0
1700125G22Rik	0	0	0.295858	0	0	0	0	0	0	0	0	0	0.714286	1.53846	0	0	0.680272	0	0.862069	0
1700125H03Rik	0	0	0	0	0	0	0	0	0	0	0	0	0	0	0	0	0	0	0	0
1700125H20Rik	0	0	0	0	0	0	0	0	0	0	0	0	0	0	0	0.591716	0	0	0.862069	0
1700126H18Rik	0	0	0	0	0	0	0	0	0	0	0	0	0	0	0	0	0	0	0	0
1700128A07Rik	0	0	0	0	0	0	0	0	0	0	0	0	0	0	0	0	0	0	0	0
1700128F08Rik	0	0	0	0	0	0	0	0	0	0	0	0	0	0	0	0	0	0	0	0
1700129C05Rik	0	0	0	0	0	0	0	0	0	0	0	0	0	0	0	0	0	0	0	0
1810006J02Rik	0	3.57143	1.47929	0.392157	0	1.75747	0.223214	1.34228	0	3.11111	0	0	1.42857	0	0	0	0	0	0.862069	0
1810006K21Rik	93.8776	71.4286	91.4201	98.0392	48.3871	64.6749	86.3839	32.8859	95.9596	100	87.6033	90.1639	92.8571	70.7692	93.6073	88.7574	89.1156	65.4545	39.6552	100
1810007C17Rik	0	0	0	0	0	0	0	0	0	0	0	0	0	0	0	0	0	0	0	0
1810007D17Rik	0	0	0	0	0	0	0	0	0	0	0	0	0	0	0	0	0	0	0	0
1810007I06Rik	0	0	0	0	0	0	0	0	0	0	0	0	0	0	0	0	0	0	0	0
1810008A18Rik	24.4898	12.5	27.5148	45.098	6.45161	9.31459	16.5179	4.69799	44.4444	53.7778	23.1405	14.7541	36.4286	24.6154	20.0913	30.7692	23.8095	15.4545	1.72414	25.8065
1810008I18Rik	0	0	0.295858	0	0	0	0	0	0	7.55556	0	1.63934	0	0	0	0	0	0	0	0
1810009A15Rik	51.0204	44.0476	71.5976	75.2941	20.1613	26.8893	39.7321	12.0805	88.8889	95.1111	70.2479	47.541	72.8571	43.0769	48.8584	70.4142	51.7007	50	8.62069	48.3871
1810009J06Rik	0	0	0	0	0	0	0	0	0	0	0	0	0	0	0	0	0	0	0	0
1810010D01Rik	0	0	0	0	0.806452	0	0	0.671141	0	0	0	0	0	1.53846	0	0	0	0	0	0
1810010H24Rik	0	0	0.591716	0	0	0	0.223214	0	0	0.444444	0.826446	0	2.14286	0	0	0	0	0.909091	0	0
1810011H11Rik	1.02041	4.16667	15.9763	11.3725	0.806452	1.58172	3.57143	0	7.07071	41.3333	1.65289	1.63934	9.28571	0	0.913242	0	0	0	0	0
1810011O10Rik	0	0	0	0	0	0	0	0	0	0	0	0	0	0	0	0	0	0	0	0
1810012K16Rik	0	0	0	0.784314	0	0	0	0	1.0101	0.888889	3.30579	0	0	1.53846	0	1.77515	0.680272	0	0	0
1810012P15Rik	7.14286	11.9048	6.21302	17.6471	0.806452	1.58172	4.46429	4.02685	17.1717	46.2222	9.09091	27.8689	30	10.7692	7.30594	26.0355	33.3333	6.36364	13.7931	9.67742
1810013A23Rik	0	0	0	0	0	0	0	0	0	0	0	0	0	0	0	0	0	0	0	0
1810013D10Rik	56.1224	19.0476	34.6154	67.0588	7.25806	14.7627	41.0714	4.02685	64.6465	67.1111	57.0248	24.5902	58.5714	52.3077	45.6621	62.1302	22.449	31.8182	3.44828	29.0323
1810013L24Rik	5.10204	4.16667	12.426	9.41176	6.45161	7.55712	8.03571	0.671141	16.1616	20.8889	7.43802	6.55738	12.1429	6.15385	5.93607	16.568	17.0068	4.54545	11.2069	3.22581
1810014B01Rik	7.14286	3.57143	4.73373	18.8235	0	0.175747	3.34821	1.34228	15.1515	41.7778	17.3554	8.19672	34.2857	3.07692	6.84932	25.4438	14.966	5.45455	0	9.67742
1810014F10Rik	5.10204	1.19048	5.32544	20.3922	0	1.23023	9.59821	0.671141	17.1717	9.33333	2.47934	3.27869	9.28571	4.61538	0	2.36686	4.08163	0	0	6.45161
1810018F18Rik	0	0	0	0	0	0	0	0	0	0	0	0	0	0	0	0	0	0	0	0
1810019D21Rik	0	0	0.295858	0.392157	0	0.175747	0.223214	0	0	0.444444	0	0	0	0	0	0.591716	0	0	0	0
1810019J16Rik	0	0	0	0	0	0	0	0	0	0	0	0	0	0	0	0	0	0	0	0
1810020D17Rik	21.4286	11.3095	13.9053	32.9412	3.22581	2.46046	16.2946	1.34228	33.3333	40.8889	20.6612	19.6721	35.7143	13.8462	18.2648	21.3018	23.1293	5.45455	0.862069	16.129
1810020O05Rik	0	0	0	0	0	0	0	0	0	0	0	0	0	0	0	0	0	0	0	0
1810021B22Rik	5.10204	1.19048	25.1479	3.52941	1.6129	14.4112	2.23214	1.34228	0	14.6667	0	0	7.85714	0	5.47945	0.591716	0	0.909091	0	0
1810022K09Rik	43.8776	34.5238	36.6864	62.7451	2.41935	9.31459	38.1696	5.36913	55.5556	80.8889	36.3636	52.459	67.1429	44.6154	31.9635	69.8225	36.0544	29.0909	1.72414	48.3871
1810024B03Rik	1.02041	2.38095	0.591716	7.84314	0	0.702988	1.33929	0	4.0404	7.11111	4.95868	4.91803	11.4286	4.61538	3.19635	8.28402	4.7619	1.81818	0.862069	0
1810026B05Rik	45.9184	42.8571	36.9822	34.5098	19.3548	24.0773	23.2143	4.69799	37.3737	38.2222	46.281	47.541	53.5714	26.1538	47.032	43.1953	36.7347	38.1818	13.7931	51.6129
1810026J23Rik	15.3061	5.95238	15.9763	29.0196	0	2.28471	11.1607	0.671141	18.1818	59.5556	22.314	16.3934	22.1429	9.23077	11.4155	24.8521	28.5714	8.18182	2.58621	25.8065
1810027O10Rik	82.6531	41.0714	91.716	97.6471	3.22581	42.8822	79.0179	73.8255	97.9798	99.1111	78.5124	80.3279	88.5714	70.7692	66.6667	85.7988	96.5986	26.3636	84.4828	51.6129
1810029B16Rik	10.2041	5.35714	13.0178	20.3922	0	1.23023	2.00893	2.01342	5.05051	76.8889	5.78512	6.55738	26.4286	12.3077	3.19635	26.6272	14.2857	4.54545	0	12.9032
1810030J14Rik	0	0	0	0	0	0	0	0	0	0	0	0	0	0	0	0	0	0	0	0
1810030N24Rik	26.5306	16.6667	19.2308	27.8431	5.64516	8.08436	13.1696	4.02685	33.3333	32.4444	34.7107	29.5082	27.1429	21.5385	21.9178	37.2781	35.3741	11.8182	11.2069	12.9032
1810030O07Rik	31.6327	13.0952	13.3136	38.4314	4.03226	4.21793	18.3036	0.671141	34.3434	44.8889	19.0083	9.83607	29.2857	10.7692	15.9817	25.4438	13.6054	12.7273	0.862069	32.2581
1810031K17Rik	44.898	24.4048	37.8698	56.8627	17.7419	25.6591	40.625	12.7517	66.6667	53.3333	34.7107	50.8197	42.8571	24.6154	26.484	39.0533	55.7823	22.7273	27.5862	32.2581
1810032O08Rik	17.3469	4.16667	1.47929	8.62745	0	0.175747	5.58036	0.671141	5.05051	24.8889	5.78512	1.63934	20.7143	4.61538	4.56621	12.426	10.2041	4.54545	1.72414	3.22581
1810033B17Rik	28.5714	7.7381	95.2663	79.6078	99.1935	94.3761	78.125	22.1477	89.899	66.2222	12.3967	4.91803	11.4286	6.15385	10.0457	11.2426	10.2041	19.0909	9.48276	16.129
1810034E14Rik	2.04082	4.16667	0.295858	6.27451	0	0	3.79464	0.671141	11.1111	4.88889	1.65289	1.63934	2.14286	3.07692	17.3516	0.591716	1.36054	1.81818	0	12.9032
1810035I16Rik	0	0	0	0	0	0	0	0	0	0	0	0	0.714286	0	0	0	0	0	0	0
1810035L17Rik	69.3878	31.5476	53.2544	86.6667	3.22581	15.1142	51.5625	9.39597	88.8889	92.8889	56.1983	34.4262	85.7143	38.4615	48.8584	73.3728	54.4218	22.7273	10.3448	61.2903
1810037I17Rik	74.4898	57.7381	98.8166	94.5098	62.9032	85.9402	70.7589	21.4765	98.9899	98.2222	79.3388	77.0492	82.8571	50.7692	59.3607	78.6982	87.0748	43.6364	15.5172	70.9677
1810041L15Rik	0	0	0	0	0	0	0	0	0	0	0	0	0	0	0	0	0	0	0	0
1810043G02Rik	9.18367	1.19048	5.6213	16.0784	4.03226	3.69069	11.8304	2.01342	18.1818	12.8889	2.47934	11.4754	18.5714	7.69231	5.93607	5.91716	7.48299	0.909091	0	0
1810043H04Rik	60.2041	35.7143	54.4379	71.7647	9.67742	20.3866	39.0625	8.05369	74.7475	88.4444	64.4628	54.0984	67.1429	30.7692	44.7489	63.3136	35.3741	31.8182	0.862069	48.3871
1810044D09Rik	5.10204	5.35714	4.14201	9.01961	0.806452	1.75747	3.79464	0	2.0202	20.8889	2.47934	3.27869	8.57143	1.53846	4.56621	10.6509	4.7619	1.81818	0	9.67742
1810046J19Rik	67.3469	48.8095	56.8047	83.5294	38.7097	43.761	62.5	12.0805	88.8889	86.6667	70.2479	70.4918	67.8571	60	60.274	75.7396	38.0952	50.9091	6.89655	64.5161
1810046K07Rik	0	0	0	0	0	0	0	0	0	0	0	0	0	0	0	0	0	4.54545	0	0
1810048J11Rik	5.10204	3.57143	1.47929	10.1961	0	0.175747	3.125	0	3.0303	18.6667	6.61157	0	15.7143	7.69231	5.47945	14.2012	3.40136	0.909091	0	6.45161
1810049H13Rik	7.14286	8.92857	11.8343	20.3922	1.6129	3.86643	7.58929	3.3557	15.1515	36	5.78512	6.55738	22.8571	3.07692	13.6986	10.6509	16.3265	2.72727	0.862069	3.22581
1810053B23Rik	0	0	0.295858	0	0	0	0	1.34228	0	0	0	0	0	1.53846	0	0	3.40136	0	3.44828	0
1810055G02Rik	3.06122	1.78571	33.7278	9.01961	0	9.84183	2.23214	0.671141	3.0303	24	2.47934	3.27869	6.42857	0	1.36986	2.36686	6.12245	3.63636	0	0
1810058I24Rik	70.4082	48.8095	92.8994	80	66.129	73.9895	62.5	98.6577	83.8384	92.4444	55.3719	60.6557	77.1429	49.2308	63.9269	63.3136	83.6735	55.4545	100	48.3871
1810062G17Rik	0	0.595238	0	0.784314	0	0.175747	0	0	1.0101	0.888889	0.826446	0	0	0	0	0	0	0	0	0
1810062O18Rik	1.02041	1.78571	0.591716	0.392157	0	0	0.223214	0	2.0202	2.22222	4.13223	0	2.14286	1.53846	1.82648	1.77515	0	3.63636	0.862069	3.22581
1810063B05Rik	39.7959	18.4524	36.0947	52.9412	4.83871	10.1933	25.6696	2.68456	63.6364	68	42.9752	42.623	40	6.15385	31.0502	37.8698	27.2109	11.8182	0.862069	41.9355
1810063B07Rik	21.4286	18.4524	4.73373	27.451	0.806452	0.527241	10.9375	0.671141	9.09091	28	5.78512	14.7541	32.1429	9.23077	20.0913	12.426	8.16327	10	0	29.0323
1810064F22Rik	0	0	0	0	0	0	0	0	0	0	0	0	0	0	0	0	0	0	0	0
1810065E05Rik	0	0	0.295858	0	0	0.175747	0	0	0	0.444444	0	0	0	0	10.5023	0	0.680272	0	0	0
1810074P20Rik	22.449	12.5	9.76331	35.2941	0.806452	4.74517	18.5268	0.671141	23.2323	48.4444	16.5289	27.8689	30.7143	20	17.8082	25.4438	13.6054	8.18182	1.72414	58.0645
2010001E11Rik	0	0	0	0	0	0	0	0	0	0	0	0	0	0	0	0	0	0	0	0
2010001M06Rik	0	0	0	0	0	0	0	0	0	0.444444	0	0	0	0	0	0	0	0	0	0
2010001M09Rik	14.2857	4.16667	8.87574	7.05882	2.41935	3.69069	4.01786	8.05369	12.1212	15.1111	95.0413	8.19672	7.14286	98.4615	43.379	97.0414	9.52381	81.8182	5.17241	100
2010002M12Rik	1.02041	0.595238	0.887574	0.392157	20.1613	7.38137	0.446429	2.01342	1.0101	0.444444	0.826446	0	0	1.53846	0.456621	0	0	0.909091	0	0
2010002N04Rik	42.8571	1.19048	28.4024	22.3529	19.3548	18.8049	22.7679	3.3557	19.1919	28.4444	14.876	55.7377	42.8571	15.3846	22.8311	13.6095	5.44218	4.54545	5.17241	6.45161
2010003K11Rik	0	0	0	0	0	0	0	0	0	0	0	0	0	0	0	0	0	0	0	0
2010003K15Rik	0	0	0	0	0	0	0	0	0	0	0	0	0	0	0	0	0	0	0	0
2010003O02Rik	28.5714	26.1905	41.716	47.451	6.45161	12.3023	23.6607	4.02685	39.3939	67.1111	24.7934	40.9836	59.2857	21.5385	33.79	42.0118	31.9728	17.2727	2.58621	35.4839
2010005H15Rik	0	0	0	0	0	0	0.223214	0	0	0.444444	0	1.63934	0	0	0	0	0	1.81818	0	0
2010009K17Rik	0	0	0	0	0	0	0	0	0	0	0	0	0	0	0	0	0	0	0	0
2010010A06Rik	0	0	0	0	0	0	0	0	0	0	0	0	0	0	0	0	0	0	0	0
2010011I20Rik	7.14286	3.57143	4.14201	9.80392	0.806452	2.10896	7.14286	69.7987	9.09091	13.3333	4.95868	4.91803	14.2857	15.3846	5.93607	5.32544	93.1973	2.72727	79.3103	12.9032
2010012O05Rik	20.4082	5.95238	7.98817	39.2157	1.6129	2.9877	18.5268	0	31.3131	48.8889	17.3554	11.4754	42.8571	26.1538	14.1553	27.8107	20.4082	13.6364	1.72414	19.3548
2010015L04Rik	1.02041	0	0	0.784314	0.806452	0	0.223214	0	0	0.888889	0	1.63934	0	1.53846	0.456621	0	0	0.909091	0	3.22581
2010016I18Rik	0	5.35714	1.18343	1.17647	0	0.351494	0.223214	0	0	0.888889	0	1.63934	0	0	0	0	0.680272	0	0	0
2010106C02Rik	0	0	0	0	0	0	0	0	0	0	0	0	0	0	0	0	0	0	0	0
2010106E10Rik	0	0	0	0	0	0	0	0	0	0	0	0	0	0	0	0	0	0	0	0
2010106G01Rik	42.8571	12.5	16.568	52.549	12.0968	12.6538	43.75	3.3557	53.5354	35.5556	16.5289	18.0328	32.8571	15.3846	26.484	21.3018	31.9728	9.09091	2.58621	32.2581
2010107E04Rik	97.9592	91.6667	94.6746	100	47.5806	73.2865	95.3125	47.651	100	99.5556	97.5207	95.082	99.2857	96.9231	95.8904	98.2249	87.0748	73.6364	48.2759	90.3226
2010107G12Rik	1.02041	0	0.295858	0	0	0	0	0	0	0	0.826446	0	1.42857	0	1.36986	1.18343	0	0	0	0
2010107G23Rik	0	1.78571	0	0	0	0	0	0	0	0	0	0	0	1.53846	0	0	1.36054	1.81818	0	0
2010107H07Rik	36.7347	32.1429	70.1183	68.2353	47.5806	39.0158	45.5357	10.0671	59.596	95.5556	21.4876	52.459	70	21.5385	35.1598	46.7456	41.4966	25.4545	9.48276	51.6129
2010109A12Rik	0	0.595238	0.295858	1.17647	0	0.527241	0.223214	2.68456	0	0.888889	0.826446	0	0.714286	3.07692	0	2.36686	1.36054	0.909091	1.72414	9.67742
2010109I03Rik	0	0.595238	0.295858	0.392157	0.806452	0	0.223214	0	0	0.888889	3.30579	0	0	1.53846	0	2.36686	0.680272	1.81818	0	3.22581
2010109K11Rik	16.3265	11.9048	11.5385	28.6275	3.22581	4.39367	15.8482	6.04027	37.3737	20.8889	12.3967	9.83607	22.1429	3.07692	6.39269	16.568	28.5714	13.6364	18.9655	25.8065
2010110P09Rik	1.02041	0	0.295858	0	0	0.175747	0.223214	1.34228	0	0.444444	0	0	0	0	0	0	0	0	0	0
2010111I01Rik	2.04082	2.38095	2.07101	6.66667	0	0	0.446429	0	5.05051	6.22222	6.61157	1.63934	3.57143	1.53846	1.36986	6.50888	1.36054	1.81818	0	0
2010204K13Rik	0	0	0.887574	0.392157	0	0	0	0	2.0202	11.5556	0	11.4754	24.2857	1.53846	0.456621	15.9763	7.48299	1.81818	0	3.22581
2010300C02Rik	1.02041	8.33333	0	0	0	0	0.223214	0	0	0	0	0	2.85714	16.9231	0	2.36686	0	0	0.862069	0
2010305A19Rik	9.18367	5.35714	2.66272	18.8235	0	0.351494	4.91071	2.01342	10.101	24	6.61157	8.19672	15.7143	7.69231	3.65297	26.6272	12.9252	6.36364	0	9.67742
2010308F09Rik	0	0	0	0	0	0	0	0	0	0	0	0	0.714286	0	0	0.591716	0	0	0	0
2010310C07Rik	0	0	0	0	0	0	0	0	0	0	0	0	0	0	0	0	0	0	0	0
2010315B03Rik	4.08163	3.57143	4.73373	6.27451	0.806452	1.40598	3.57143	0.671141	7.07071	6.66667	3.30579	6.55738	3.57143	7.69231	1.82648	3.5503	0.680272	5.45455	0	6.45161
2010317E24Rik	21.4286	1.19048	18.3432	13.3333	0	0.702988	0	0.671141	25.2525	30.2222	62.8099	14.7541	7.14286	3.07692	0	40.8284	7.48299	0.909091	1.72414	0
2010320M18Rik	12.2449	2.97619	4.73373	20.7843	0	2.46046	8.03571	1.34228	11.1111	24	4.95868	3.27869	17.1429	3.07692	12.7854	5.91716	16.3265	5.45455	0.862069	16.129
2010321M09Rik	14.2857	6.54762	14.497	22.3529	5.64516	2.10896	7.36607	2.68456	22.2222	37.7778	28.9256	16.3934	28.5714	12.3077	10.9589	31.3609	20.4082	10	3.44828	9.67742
2200002D01Rik	0	1.19048	0	0	0	0.351494	0.223214	0	0	1.33333	14.876	1.63934	6.42857	20	2.28311	13.0178	0.680272	0.909091	0	0
2200002J24Rik	0	0	0	0.784314	0	0	0	0	0	0.444444	0	0	0.714286	0	0	0	0	0	0	0
2200002K05Rik	0	0	0	0	0	0	0	0	0	0	0	0	0.714286	0	0	0	1.36054	0	0	0
2210009G21Rik	9.18367	3.57143	4.43787	5.88235	0	0.878735	3.34821	1.34228	11.1111	6.66667	7.43802	3.27869	9.28571	0	3.65297	11.2426	6.12245	1.81818	0.862069	0
2210010C04Rik	0	0	0	0	0	0	0	0	0	0.888889	0	8.19672	0	0	0	0	0	0	0	0
2210010C17Rik	0	0.595238	1.77515	1.96078	0	1.23023	0.223214	0	1.0101	4	0.826446	13.1148	2.14286	3.07692	0	2.95858	0	0	0	0
2210012G02Rik	21.4286	8.92857	16.568	36.4706	6.45161	7.73286	18.75	2.01342	37.3737	45.3333	19.0083	16.3934	22.8571	23.0769	14.1553	23.6686	22.449	13.6364	7.75862	9.67742
2210013O21Rik	27.551	19.0476	16.2722	49.8039	0.806452	1.93322	22.5446	4.69799	40.404	78.6667	5.78512	32.7869	51.4286	33.8462	10.5023	23.0769	18.3673	0	0	12.9032
2210015D19Rik	13.2653	7.7381	16.568	25.8824	0.806452	2.6362	7.36607	0	22.2222	24.8889	19.0083	13.1148	17.8571	4.61538	4.10959	21.3018	12.9252	7.27273	0	3.22581
2210016F16Rik	24.4898	27.381	20.1183	57.6471	2.41935	2.46046	32.3661	3.3557	58.5859	59.5556	35.5372	34.4262	36.4286	10.7692	26.9406	36.0947	30.6122	17.2727	0	48.3871
2210016L21Rik	29.5918	19.0476	18.6391	33.7255	3.22581	6.32689	16.7411	1.34228	25.2525	57.3333	23.1405	16.3934	40	23.0769	21.9178	34.3195	20.4082	16.3636	0	16.129
2210018M11Rik	14.2857	5.95238	11.2426	15.6863	3.22581	2.6362	6.91964	1.34228	22.2222	19.1111	19.8347	14.7541	21.4286	9.23077	5.93607	26.6272	19.0476	5.45455	1.72414	9.67742
2210019I11Rik	0	0	0	0	0	0	0	0	0	0	0	0	0	0	0	0	0	0	0	0
2210020M01Rik	42.8571	2.38095	47.0414	44.3137	8.06452	26.0105	25.4464	4.02685	60.6061	28.8889	2.47934	4.91803	43.5714	0	86.3014	4.73373	47.619	3.63636	6.89655	0
2210021J22Rik	15.3061	14.2857	15.3846	31.3725	1.6129	2.10896	10.9375	0.671141	20.202	45.3333	22.314	14.7541	23.5714	7.69231	10.9589	31.9527	30.6122	8.18182	3.44828	58.0645
2210039B01Rik	0	0	0	0	0	0	0	0	0	0	0	0	0	0	0	0	0	0	0	0
2210403K04Rik	7.14286	5.35714	5.6213	19.6078	22.5806	12.478	30.5804	3.3557	32.3232	7.11111	3.30579	4.91803	9.28571	1.53846	11.8721	2.95858	5.44218	9.09091	6.89655	12.9032
2210404J11Rik	4.08163	2.97619	4.43787	9.01961	0	1.40598	5.80357	0	10.101	11.5556	9.91736	4.91803	8.57143	1.53846	2.73973	6.50888	4.7619	4.54545	0	12.9032
2210404O07Rik	7.14286	1.78571	7.10059	10.5882	0.806452	1.23023	4.01786	0	4.0404	13.3333	1.65289	18.0328	11.4286	6.15385	8.6758	5.91716	0	0.909091	0	3.22581
2210404O09Rik	11.2245	0.595238	0.887574	7.45098	0	0	1.78571	0	6.06061	5.33333	1.65289	1.63934	2.85714	3.07692	2.73973	7.69231	1.36054	1.81818	0	0
2210407C18Rik	0	0	0	0	0	0	0	0	0	0	0	0	0	0	0	0	0	0	0	0
2210408F21Rik	0	0	0.295858	0.784314	0	0.175747	2.45536	0.671141	0	0	0	0	5.71429	0	3.65297	0	0.680272	0	0	9.67742
2210408I21Rik	1.02041	1.78571	1.18343	1.56863	0.806452	0	0.892857	0	3.0303	8.88889	0.826446	1.63934	5	3.07692	0.456621	1.77515	5.44218	0.909091	0	3.22581
2210409D07Rik	0	0	0	0	0	0	0	0	0	0	0	0	0	0	0	0	0	0	0	0
2210409E12Rik	0	0	0	0	0	0	0	0	0	0	0	0	0	0	0	0	0	0	0	0
2210411K11Rik	18.3673	13.6905	7.69231	28.2353	0	0.702988	6.25	0.671141	21.2121	50.2222	4.95868	36.0656	37.8571	4.61538	3.65297	24.8521	31.9728	16.3636	2.58621	35.4839
2210414B05Rik	0	0	0	0	0	0	0	0	0	0	0	0	0	0	0	0	0	0	0	0
2210415F13Rik	0	0	0	0	0	0	0	0	0	0	0	0	0	0	0	0	0	0	0	0
2210416O15Rik	0	0	0	0	0	0	0	0	0	0	0	1.63934	0	0	0	0	0	0	0	0
2210417A02Rik	1.02041	0	0.295858	0.392157	0	0.175747	0.669643	0	2.0202	0	0	0	0	0	0	1.18343	0	0	0	0
2210417K05Rik	4.08163	1.19048	5.32544	3.52941	0	2.10896	2.67857	1.34228	3.0303	8.44444	0	4.91803	9.28571	3.07692	0.913242	2.36686	7.48299	1.81818	7.75862	0
2210420H20Rik	0	0	0	0	0	0	0	0	0	0	0	0	0	0	0	0	0	0	0	0
2300002M23Rik	0	0	0	0	0	0	0	0	0	0	0	0	0	0	0	0	0	0	0	3.22581
2300003K06Rik	0	0	0	0	0	0	0	0	0	0	0	0	0	0	0	0	0	0	0	0
2300005B03Rik	0	0	0	0	0	0	0	0	0	0	0	0	0	0	0	0	0	0	0	0
2300009A05Rik	18.3673	19.0476	25.7396	41.5686	1.6129	8.26011	18.75	3.3557	15.1515	50.6667	9.91736	26.2295	37.1429	9.23077	15.0685	20.1183	18.3673	13.6364	1.72414	35.4839
2310001A20Rik	21.4286	5.95238	37.574	34.1176	8.06452	14.2355	4.01786	3.3557	16.1616	66.2222	18.1818	19.6721	26.4286	6.15385	14.1553	29.5858	20.4082	1.81818	0.862069	29.0323
2310001H17Rik	20.4082	17.2619	46.1538	33.7255	64.5161	49.3849	34.375	10.0671	38.3838	64	14.876	55.7377	38.5714	20	9.58904	28.4024	6.12245	20	1.72414	25.8065
2310001H18Rik	0	0	0	0	0	0	0	0	0	0	0	0	0	0	0	0	0	0	0	0
2310001K24Rik	0	0	0.295858	0	0	0	0	0	0	0.888889	0	0	2.14286	0	0	0.591716	0	0	0	0
2310002D06Rik	0	0	0	0	0	0	0	0	0	0	0	0	0	0	0	0	0	0	0	0
2310002J15Rik	0	0	0	0	0	0	0	0	0	0.888889	0	0	0	0	0	0	0	0	0	0
2310002L09Rik	0	0	0	0	0	0	0	0	0	0	0	0	0	0	0	0	0	0	0	0
2310002L13Rik	0	0	0	0	0	0	0	0	0	0	0	0	0	0	0	0	0	0	0	0
2310003C23Rik	35.7143	7.14286	46.7456	43.1373	19.3548	19.5079	19.1964	6.71141	53.5354	60	30.5785	18.0328	37.1429	33.8462	21.4612	27.2189	86.3946	9.09091	28.4483	22.5806
2310003F16Rik	90.8163	76.1905	84.6154	96.8627	31.4516	38.3128	71.4286	19.4631	94.9495	96.4444	85.124	81.9672	95.7143	80	85.3881	85.7988	84.3537	69.0909	26.7241	80.6452
2310003H01Rik	7.14286	1.19048	7.10059	9.01961	1.6129	0	3.79464	0	13.1313	16.4444	4.13223	3.27869	15.7143	4.61538	3.65297	10.0592	10.2041	0	0	3.22581
2310003L22Rik	7.14286	7.14286	6.50888	16.8627	0	1.05448	4.91071	0	14.1414	30.2222	12.3967	3.27869	13.5714	4.61538	4.56621	15.9763	9.52381	4.54545	0	3.22581
2310004I24Rik	15.3061	10.119	18.3432	22.3529	6.45161	8.96309	14.0625	2.68456	27.2727	38.2222	16.5289	11.4754	16.4286	6.15385	5.47945	21.8935	8.16327	7.27273	0	25.8065
2310004N24Rik	47.9592	23.8095	38.4615	72.1569	4.83871	14.2355	37.7232	4.02685	65.6566	80.4444	47.1074	49.1803	62.1429	38.4615	37.8995	64.497	30.6122	20	2.58621	25.8065
2310005A03Rik	0	0	0	0	0	0	0	0	0	0	0	0	0	0	0	0	0	0	0	0
2310005E17Rik	0	0	0	0	0	0	0	0	0	0	0	0	0	0	0	0	0	0	0	0
2310005G13Rik	0	0	7.10059	0	0	11.0721	0.223214	0	1.0101	0.444444	0	0	0	0	0	0.591716	0.680272	1.81818	0	0
2310007B03Rik	0	0	0	0	0	0	0	0	0	0	0	0	0	0	0	0	0	0	0	0
2310007L24Rik	0	0.595238	0	0	0	0	0	0	0	0	0	0	0	0	0	0	0	0	0	0
2310008H04Rik	17.3469	1.19048	19.2308	22.3529	9.67742	7.02988	9.375	2.01342	42.4242	32.8889	18.1818	19.6721	20	0	7.76256	13.0178	15.6463	0.909091	2.58621	9.67742
2310008H09Rik	39.7959	17.2619	28.1065	49.8039	2.41935	7.55712	22.7679	2.68456	34.3434	74.6667	33.0579	24.5902	66.4286	20	19.6347	47.929	31.9728	12.7273	1.72414	22.5806
2310008N11Rik	0	0	0	0	0	0	0.223214	0	0	0	10.7438	0	0	4.61538	0	4.73373	0	0	0	0
2310009A05Rik	39.7959	22.619	50	53.3333	13.7097	29.5255	34.375	2.68456	50.5051	77.3333	37.1901	49.1803	52.8571	38.4615	28.7671	52.6627	29.2517	23.6364	3.44828	22.5806
2310009B15Rik	21.4286	10.119	19.5266	43.9216	2.41935	7.20562	32.8125	2.68456	50.5051	58.6667	23.1405	19.6721	47.8571	21.5385	15.9817	42.6036	27.2109	6.36364	0.862069	6.45161
2310010J17Rik	4.08163	4.7619	4.43787	4.31373	9.67742	5.44815	2.90179	4.02685	6.06061	4.88889	4.13223	3.27869	7.14286	4.61538	10.0457	7.69231	10.8844	4.54545	12.931	12.9032
2310010M20Rik	0	0	0.295858	0	0	0	0.223214	0	0	0	0.826446	0	0.714286	0	0.456621	0	0.680272	0	0	0
2310011J03Rik	35.7143	20.8333	36.0947	60.7843	11.2903	19.6837	27.4554	6.04027	55.5556	75.5556	46.281	42.623	53.5714	26.1538	26.9406	44.3787	46.2585	17.2727	7.75862	29.0323
2310014F07Rik	0	0	0.887574	0	0	0	0	0	0	3.11111	0	0	0.714286	0	0	0	0	0	0	0
2310014L17Rik	0	0	0.295858	0	0.806452	0	0	0	0	0.444444	1.65289	1.63934	0	0	0	0.591716	0	0	0	0
2310015A10Rik	8.16327	4.16667	3.25444	6.66667	19.3548	7.38137	6.91964	3.3557	3.0303	2.22222	0.826446	6.55738	10	4.61538	7.76256	3.5503	10.2041	1.81818	4.31034	6.45161
2310015B20Rik	0	0	0.295858	0.392157	0	0	0.446429	0	0	0.888889	0	0	0	0	0	0.591716	0	0	0	0
2310015D24Rik	0	0	0	0	0	0	0	0	0	0	0	0	0	0	0	0	0	0	0	0
2310016D03Rik	0	0	0	0	0	0	0	0	0	0	0	0	0	0	0	0	0	0	0	0
2310016M24Rik	80.6122	62.5	78.9941	89.8039	53.2258	48.5062	72.7679	16.7785	93.9394	97.3333	46.281	68.8525	89.2857	67.6923	82.1918	75.1479	49.6599	48.1818	12.931	80.6452
2310020H05Rik	0	0	0	0	0	0	0	0	0	0	0	0	0	0	0	0	0	0	0	0
2310021P13Rik	7.14286	7.7381	7.39645	12.1569	0.806452	4.74517	7.8125	0.671141	9.09091	11.1111	9.91736	9.83607	12.8571	0	9.13242	10.6509	9.52381	6.36364	1.72414	3.22581
2310022A10Rik	11.2245	4.7619	15.3846	14.1176	1.6129	1.40598	10.7143	0.671141	14.1414	22.6667	18.1818	14.7541	20	9.23077	5.93607	28.4024	21.0884	9.09091	0	12.9032
2310022B05Rik	11.2245	1.19048	0.887574	8.23529	0.806452	0.175747	3.125	2.01342	8.08081	7.11111	0.826446	0	10.7143	0	22.8311	5.32544	54.4218	1.81818	14.6552	9.67742
2310028H24Rik	3.06122	2.38095	0.295858	1.96078	3.22581	1.40598	0.892857	0.671141	3.0303	0.444444	0	0	1.42857	0	3.19635	0.591716	0	1.81818	0	0
2310030A07Rik	0	0	0	0	0	0	0	0	0	0	0	0	0	0	0	0	0	0	0	0
2310030G06Rik	0	0	0	0	0	0	0	0	0	0	0	0	0.714286	0	0	0	0	0	0	0
2310030N02Rik	15.3061	4.7619	2.95858	21.5686	0	0.702988	6.91964	1.34228	19.1919	37.7778	4.95868	4.91803	29.2857	9.23077	4.10959	23.6686	12.2449	4.54545	0	0
2310033E01Rik	1.02041	0	0.295858	0	0	0	0	0	0	0	0	0	0	3.07692	0	0.591716	0	0	0	0
2310033P09Rik	26.5306	21.4286	21.8935	37.2549	5.64516	6.85413	8.25893	2.68456	31.3131	58.2222	27.2727	18.0328	40.7143	32.3077	12.7854	40.8284	46.2585	11.8182	0	25.8065
2310034C09Rik	0	0	0	0	0	0	0	0	0	0	0	0	0	0	0	0	0	0	0	0
2310034G01Rik	2.04082	0	2.07101	3.92157	0	0.527241	0.446429	0.671141	1.0101	17.7778	0.826446	6.55738	7.85714	0	0	0.591716	0.680272	0	0	0
2310034O05Rik	0	0	0	0	0	0	0	0	0	0.888889	0	0	0	0	0	0	0	0	0	0
2310035C23Rik	30.6122	9.52381	15.9763	25.4902	6.45161	7.90861	15.625	1.34228	39.3939	34.2222	14.0496	14.7541	21.4286	15.3846	16.4384	15.9763	14.966	7.27273	4.31034	6.45161
2310035K24Rik	12.2449	5.35714	1.77515	17.6471	5.64516	2.28471	16.2946	6.71141	28.2828	7.11111	4.13223	8.19672	8.57143	1.53846	2.73973	10.0592	15.6463	0.909091	9.48276	9.67742
2310036O22Rik	88.7755	67.8571	90.8284	96.0784	47.5806	61.1599	77.2321	31.5436	98.9899	97.3333	95.8678	75.4098	92.1429	83.0769	73.516	94.0828	85.034	67.2727	31.8966	90.3226
2310037I24Rik	12.2449	4.7619	7.10059	22.3529	0.806452	1.05448	8.92857	0.671141	23.2323	43.5556	21.4876	13.1148	25.7143	13.8462	6.84932	30.7692	18.3673	4.54545	4.31034	19.3548
2310039H08Rik	30.6122	14.881	16.8639	44.7059	0.806452	6.32689	14.2857	3.3557	26.2626	68.4444	22.314	31.1475	55.7143	9.23077	30.137	34.3195	27.8912	10.9091	2.58621	38.7097
2310039L15Rik	0	0	0	0.392157	0	0	0.223214	0	0	0	0	0	0	0	0	1.18343	0	0	0	0
2310040G24Rik	13.2653	0	15.0888	19.2157	0.806452	1.40598	8.48214	0.671141	10.101	28	2.47934	4.91803	12.1429	9.23077	6.39269	7.69231	4.7619	0.909091	0	0
2310042D19Rik	0	0	0	0	0	0	0	0	0	0	0	0	0	0	0	0	0	0	1.72414	0
2310042E22Rik	1.02041	0	0	0	0	0	0	0	0	0	0	0	0	0	0	0	0	0	0	0
2310043J07Rik	0	0	0	2.35294	0	0	0	0	0	2.66667	0	0	2.14286	0	0	1.77515	0	0	0	0
2310043L19Rik	0	0	0	0	0	0	0	0	0	0	0	0	0	0	0	0	0	0	0	0
2310043O21Rik	0	0	0	0	0	0.175747	0	0.671141	0	0	0	0	0	0	0	0	0	0	0	0
2310044G17Rik	5.10204	12.5	5.02959	8.23529	0.806452	0.702988	4.46429	1.34228	9.09091	17.3333	16.5289	4.91803	18.5714	4.61538	5.93607	13.0178	10.8844	4.54545	0	12.9032
2310044H10Rik	74.4898	54.1667	53.8462	80	6.45161	14.4112	51.5625	8.05369	85.8586	93.3333	57.8512	59.0164	75	49.2308	70.7763	68.0473	74.1497	43.6364	14.6552	77.4194
2310045N01Rik	42.8571	29.1667	41.4201	46.2745	16.9355	23.9016	23.8839	10.7383	45.4545	72.8889	25.6198	42.623	32.8571	32.3077	32.8767	35.503	29.2517	23.6364	12.069	41.9355
2310046A06Rik	0	0	0	0	0	0	0	0	0	0	0	0	0	0	0	0	0	0	0	0
2310046O06Rik	11.2245	7.7381	16.2722	17.2549	0	3.33919	5.13393	2.68456	12.1212	37.7778	6.61157	14.7541	17.1429	4.61538	6.84932	15.9763	14.2857	4.54545	0.862069	16.129
2310047B19Rik	9.18367	3.57143	3.5503	10.5882	0	1.05448	2.90179	0	9.09091	16.4444	11.5702	3.27869	5.71429	1.53846	2.28311	6.50888	4.7619	1.81818	0	9.67742
2310047M10Rik	44.898	11.3095	23.0769	52.9412	26.6129	19.5079	46.2054	6.04027	52.5253	41.7778	14.876	11.4754	24.2857	4.61538	20.0913	14.2012	16.3265	13.6364	2.58621	25.8065
2310050B05Rik	0	0.595238	0	0	0	0	0	0	0	0	0	0	0	0	0	0	0	0.909091	0	3.22581
2310050C09Rik	0	0	0	0	0	0	0	0	0	0	0	0	0	0	0	0	0	0	0	0
2310057J18Rik	0	0	0	0	0	0	0	0	0	0	0	0	0	0	0	0	0	0	0	0
2310057M21Rik	3.06122	6.54762	3.5503	9.41176	0.806452	0.527241	2.00893	0	5.05051	16.8889	7.43802	8.19672	13.5714	3.07692	3.65297	7.69231	8.16327	1.81818	0	6.45161
2310057N15Rik	0	0	0	0	0	0	0	0	0	0	0	0	0	0	0	0	0	0	0	0
2310061C15Rik	54.0816	18.4524	79.2899	66.6667	1.6129	6.67838	16.0714	2.01342	92.9293	86.2222	83.4711	47.541	59.2857	23.0769	14.1553	73.9645	70.7483	13.6364	9.48276	32.2581
2310061I04Rik	14.2857	11.9048	14.497	24.3137	3.22581	3.51494	9.59821	1.34228	13.1313	43.5556	3.30579	18.0328	28.5714	12.3077	5.93607	17.7515	19.7279	10.9091	0.862069	6.45161
2310061J03Rik	11.2245	4.7619	7.69231	18.0392	0.806452	3.16344	5.80357	2.68456	8.08081	33.7778	9.09091	11.4754	22.8571	7.69231	4.56621	13.0178	4.7619	5.45455	1.72414	3.22581
2310061N02Rik	0	0	0	0	0	0	0	0	0	0	0	0	0	0	0	0	0	0	0	0
2310065F04Rik	0	0	0	0	0	0	0	0	0	0	0	0	0	0	0	0	0	0	0	0
2310067B10Rik	12.2449	4.16667	7.98817	19.6078	3.22581	3.51494	4.24107	2.01342	23.2323	20	10.7438	8.19672	18.5714	3.07692	3.65297	9.46746	19.7279	7.27273	0	3.22581
2310068J16Rik	4.08163	0.595238	0.295858	5.09804	0	0.175747	1.33929	0.671141	5.05051	11.5556	9.09091	1.63934	7.14286	4.61538	2.73973	6.50888	2.72109	0.909091	0	3.22581
2310069B03Rik	0	0	0	0	0	0	0	0	0	0	0	0	0	0	0	0	0	0	0	0
2310069G16Rik	0	0	0	0	0	0	0	0	0	0	0	0	0	0	0	0	0	0	0	0
2310079F23Rik	4.08163	0	3.5503	6.66667	0	0.527241	1.5625	0	7.07071	12	2.47934	3.27869	7.14286	3.07692	2.28311	7.69231	6.12245	0.909091	0	0
2310079G19Rik	0	0	0	0	0	0	0	0	0	0	0	0	0	0	0	0	0	0	0	0
2310081J21Rik	0	0	0	0	0	0	0	0	0	0	0	0	0	0	0	0	0	0	0	0
2400001E08Rik	78.5714	39.881	91.1243	90.9804	42.7419	52.3726	77.6786	9.39597	97.9798	92.8889	70.2479	49.1803	73.5714	36.9231	53.4247	71.5976	54.4218	30	9.48276	51.6129
2400003C14Rik	28.5714	7.7381	33.432	40	11.2903	11.0721	23.8839	4.69799	48.4848	50.2222	28.0992	24.5902	36.4286	24.6154	17.8082	30.7692	20.4082	11.8182	5.17241	12.9032
2400009B08Rik	32.6531	0.595238	23.9645	27.8431	1.6129	3.33919	9.15179	1.34228	20.202	70.2222	1.65289	4.91803	16.4286	1.53846	16.895	0.591716	2.04082	0.909091	1.72414	9.67742
2410001C21Rik	60.2041	29.1667	51.4793	67.451	35.4839	30.0527	50.4464	12.7517	75.7576	81.7778	57.8512	55.7377	67.8571	52.3077	47.032	64.497	57.1429	23.6364	21.5517	54.8387
2410002F23Rik	14.2857	9.52381	6.50888	18.0392	0.806452	0.878735	3.79464	0.671141	7.07071	33.7778	8.26446	14.7541	25.7143	6.15385	14.1553	17.1598	16.3265	8.18182	0.862069	3.22581
2410002I01Rik	8.16327	3.57143	5.91716	8.23529	0.806452	1.75747	4.01786	0.671141	7.07071	9.77778	4.95868	4.91803	5	3.07692	5.47945	6.50888	5.44218	0	0	0
2410002O22Rik	26.5306	7.14286	27.5148	36.0784	3.22581	7.02988	12.7232	2.01342	41.4141	58.2222	39.6694	22.9508	35	18.4615	13.6986	38.4615	25.8503	7.27273	3.44828	25.8065
2410003K15Rik	32.6531	13.6905	28.9941	43.9216	4.03226	9.31459	22.3214	4.02685	49.4949	67.5556	29.7521	19.6721	42.8571	23.0769	16.4384	36.6864	23.8095	10	0.862069	16.129
2410003L11Rik	0	0	0.887574	0.784314	0	0.175747	0.446429	0	1.0101	4	0	0	0.714286	0	0	0	2.04082	0	0	0
2410004A20Rik	0	0.595238	1.77515	1.96078	0	1.23023	0.669643	0	2.0202	0.444444	0	0	0.714286	0	0	0	0	0	0	0
2410004B18Rik	17.3469	10.7143	15.6805	26.2745	8.06452	8.08436	11.1607	2.68456	36.3636	39.1111	26.4463	18.0328	24.2857	18.4615	8.21918	21.3018	26.5306	4.54545	2.58621	16.129
2410004I01Rik	0	0	0	0	0	0	0	0	0	0	0	0	0	0	0	0	0	0	0	0
2410004N09Rik	34.6939	18.4524	7.98817	38.0392	1.6129	1.58172	21.6518	3.3557	26.2626	56.4444	11.5702	13.1148	58.5714	20	25.5708	26.6272	19.7279	18.1818	1.72414	12.9032
2410004P03Rik	1.02041	0	0.295858	1.17647	0	0	0.669643	0	1.0101	0.888889	0	1.63934	2.14286	1.53846	2.73973	0.591716	0	0	0	3.22581
2410006H16Rik	94.898	76.1905	49.7041	90.9804	37.9032	24.9561	92.4107	28.1879	95.9596	91.5556	86.7769	91.8033	93.5714	84.6154	93.6073	92.3077	52.381	81.8182	18.1034	54.8387
2410007B07Rik	0	0	0	0	0	0	0	0	0	0	0	0	0	0	0	0	0	0	0	0
2410012E07Rik	0	0	0	0	0	0	0	0	0	0.444444	0	0	0	0	0	0.591716	0	0	0	0
2410012M07Rik	0	0	0	0	0	0	0	0	0	0	0	0	0	0	0	0	0	0	0	0
2410015M20Rik	79.5918	77.9762	76.3314	87.451	17.7419	33.5677	65.4018	27.5168	88.8889	96.8889	64.4628	65.5738	90	53.8462	83.5616	80.4734	73.4694	63.6364	24.1379	87.0968
2410016O06Rik	11.2245	5.95238	31.9527	35.2941	14.5161	15.6415	11.3839	2.68456	30.303	52.4444	9.91736	22.9508	30	9.23077	4.56621	34.3195	16.3265	10.9091	0.862069	16.129
2410017I17Rik	0	0	0	0	0	0	0	0	0	0	0	0	0.714286	0	0	0.591716	0	0	0	0
2410017P09Rik	35.7143	5.95238	31.0651	60.3922	5.64516	14.0598	32.5893	1.34228	69.697	66.6667	23.1405	26.2295	42.8571	26.1538	15.5251	43.787	25.1701	12.7273	0	35.4839
2410018L13Rik	0	0.595238	0	0.392157	0	0	0	0	0	0	0.826446	0	0	0	0	0.591716	0	0	0	0
2410018M08Rik	0	0	0.591716	1.56863	0	0.878735	0.446429	0	0	2.66667	0.826446	0	5.71429	0	0	2.36686	0.680272	0	0	0
2410021H03Rik	0	0	0	0	0	0	0	0	0	0	0	0	0	0	0	0	0	0	0	0
2410022L05Rik	0	0	0.591716	12.549	0	0.351494	2.90179	0	1.0101	33.7778	1.65289	1.63934	8.57143	0	0	2.95858	7.48299	0.909091	0	16.129
2410042D21Rik	23.4694	2.97619	18.6391	21.9608	0	2.28471	4.24107	2.01342	33.3333	43.1111	19.8347	13.1148	16.4286	6.15385	5.93607	11.8343	34.6939	3.63636	2.58621	9.67742
2410057H14Rik	1.02041	0	0	0.392157	0	0	0	0	0	1.33333	0	0	1.42857	0	0.456621	1.18343	0	0	0	0
2410066E13Rik	1.02041	2.97619	0.887574	1.17647	0.806452	0.527241	0	0.671141	1.0101	0.888889	10.7438	0	3.57143	3.07692	0.913242	4.73373	12.9252	0.909091	4.31034	9.67742
2410075B13Rik	5.10204	1.19048	2.66272	8.62745	0	0.351494	2.45536	0.671141	2.0202	15.1111	3.30579	13.1148	18.5714	1.53846	4.10959	12.426	0.680272	3.63636	0	0
2410076I21Rik	2.04082	0	1.47929	1.17647	0	0.351494	1.11607	75.1678	1.0101	2.22222	2.47934	3.27869	7.14286	0	1.36986	0	57.1429	1.81818	78.4483	0
2410088K16Rik	0	0	0	0	0	0	0	0	0	0	0	0	0	0	0	0	0	0	0	0
2410089E03Rik	10.2041	2.38095	5.6213	9.41176	3.22581	1.40598	3.57143	1.34228	16.1616	8.88889	4.95868	3.27869	10	10.7692	6.39269	7.10059	1.36054	6.36364	0.862069	12.9032
2410091C18Rik	24.4898	4.7619	15.9763	45.8824	4.83871	7.38137	24.5536	4.02685	48.4848	38.2222	17.3554	14.7541	30	13.8462	4.56621	21.3018	21.0884	7.27273	0.862069	9.67742
2410114N07Rik	0	0	0	0	0	0	0	0	0	0	0	0	0	0	0	0	0	0	0	0
2410124H12Rik	0	0	0	0	0	0	0	0	0	0	0	0	0	0	0	0	0	0	0	0
2410127L17Rik	32.6531	16.6667	26.6272	45.098	0	2.6362	14.0625	1.34228	44.4444	74.6667	38.0165	31.1475	53.5714	18.4615	21.4612	48.5207	58.5034	14.5455	8.62069	29.0323
2410131K14Rik	3.06122	2.38095	2.66272	3.52941	6.45161	2.46046	3.125	0.671141	5.05051	6.22222	1.65289	0	5	1.53846	2.73973	4.73373	0.680272	3.63636	0	6.45161
2410137F16Rik	0	0	0	0	0	0	0	0	0	0	0	0	0	0	0	0	0	0	0	0
2410137M14Rik	0	0	0	0	0	0	0	0	0	0	0	0	0	0	0	0	0	0	0	0
2410141K09Rik	0	0	0	0	0	0	0	0	0	0	0	0	0	0	0	0	0	0	0	0
2500003M10Rik	52.0408	32.1429	56.8047	71.7647	9.67742	15.6415	32.5893	6.04027	74.7475	81.3333	81.8182	55.7377	67.8571	56.9231	42.0091	75.1479	59.8639	30	18.1034	41.9355
2500004C02Rik	1.02041	1.19048	1.77515	1.17647	0.806452	0.527241	1.33929	0	1.0101	4.44444	0.826446	1.63934	6.42857	1.53846	1.36986	3.5503	8.84354	2.72727	2.58621	3.22581
2510002D24Rik	16.3265	21.4286	15.3846	20.3922	1.6129	4.21793	6.02679	2.01342	7.07071	48.4444	19.0083	27.8689	40.7143	18.4615	21.9178	30.7692	22.449	22.7273	0	16.129
2510003D18Rik	0	0	0.295858	0	0	0.351494	0.223214	5.36913	1.0101	0.444444	0	0	2.14286	0	0.456621	0.591716	60.5442	0	52.5862	0
2510003E04Rik	17.3469	2.97619	14.497	20	0.806452	5.09666	8.03571	1.34228	22.2222	29.3333	19.8347	29.5082	26.4286	13.8462	14.6119	20.1183	25.1701	8.18182	1.72414	12.9032
2510006D16Rik	73.4694	39.2857	52.071	81.5686	22.5806	20.5624	63.6161	7.38255	90.9091	94.2222	58.6777	60.6557	67.1429	56.9231	54.3379	66.8639	72.1088	40.9091	19.8276	54.8387
2510009E07Rik	0	0	0	1.56863	0.806452	0	0.669643	0	0	0	0.826446	0	2.85714	3.07692	0.913242	2.95858	0	0.909091	0	0
2510012J08Rik	24.4898	11.3095	28.1065	40.7843	3.22581	6.67838	15.625	1.34228	40.404	48.4444	33.8843	13.1148	35	16.9231	13.242	47.929	49.6599	18.1818	4.31034	19.3548
2510039O18Rik	35.7143	19.6429	39.3491	41.9608	12.9032	15.993	23.4375	3.3557	53.5354	59.5556	29.7521	21.3115	38.5714	16.9231	22.3744	30.1775	27.8912	13.6364	0.862069	25.8065
2510049J12Rik	0	0	0	0	0	0	0	0	0	0	0	0	0	0	0	0	0	0	0	0
2600006L11Rik	0	0	0	0	0	0	0	0	0	0	0	0	0	0	0	0	0	0	0	0
2610001J05Rik	63.2653	23.8095	42.3077	78.0392	18.5484	17.3989	49.3304	7.38255	83.8384	89.3333	44.6281	62.2951	70.7143	40	51.1416	56.8047	25.8503	20	4.31034	32.2581
2610002D18Rik	8.16327	1.19048	17.1598	22.7451	0	0.527241	0.446429	0	22.2222	51.5556	19.8347	13.1148	21.4286	0	0	31.3609	40.1361	0.909091	0	0
2610002I17Rik	13.2653	2.97619	2.36686	11.7647	0	0.351494	3.79464	1.34228	11.1111	23.5556	17.3554	6.55738	9.28571	6.15385	3.65297	14.2012	9.52381	1.81818	2.58621	9.67742
2610002J02Rik	39.7959	28.5714	50	40.7843	9.67742	19.3322	23.6607	2.68456	49.4949	70.2222	14.0496	40.9836	44.2857	7.69231	25.1142	19.5266	17.0068	16.3636	0	22.5806
2610002M06Rik	6.12245	12.5	20.4142	32.9412	9.67742	7.38137	14.9554	6.04027	35.3535	52.8889	29.7521	19.6721	30.7143	21.5385	8.21918	42.0118	42.1769	10	5.17241	29.0323
2610005L07Rik	20.4082	16.6667	11.8343	20.7843	2.41935	3.86643	8.92857	0	17.1717	25.7778	23.1405	14.7541	32.1429	13.8462	17.8082	23.0769	12.2449	10	0.862069	12.9032
2610008E11Rik	3.06122	4.16667	0.591716	4.31373	0.806452	0.351494	3.57143	0.671141	6.06061	5.77778	9.91736	0	6.42857	9.23077	5.02283	7.69231	3.40136	1.81818	0	6.45161
2610015P09Rik	14.2857	5.95238	1.47929	8.23529	0	0.527241	4.91071	1.34228	4.0404	18.6667	11.5702	4.91803	23.5714	9.23077	6.84932	8.87574	8.16327	1.81818	0	6.45161
2610016A17Rik	0	0	0	0	0	0	0	0	0	0	0	0	0	0	0	0	0	0	0	3.22581
2610017I09Rik	0	0	0	0	0	0	0	0	0	0	0	0	0	0	0	0	0	0	0	0
2610018G03Rik	18.3673	11.9048	28.9941	27.8431	8.06452	9.84183	8.03571	1.34228	32.3232	61.7778	19.8347	22.9508	28.5714	9.23077	8.6758	14.2012	7.48299	4.54545	0.862069	0
2610019E17Rik	2.04082	2.97619	4.73373	18.4314	0	1.05448	2.45536	0	9.09091	29.3333	4.13223	22.9508	23.5714	3.07692	5.47945	13.0178	10.2041	1.81818	0.862069	0
2610019F03Rik	0	6.54762	0	0	0	0	0	0	0	0	0	0	0	0	0	0	0	0	0	0
2610020C07Rik	2.04082	1.19048	10.6509	5.4902	0	0.527241	0.223214	0	9.09091	8.88889	6.61157	4.91803	7.14286	1.53846	0.913242	9.46746	10.8844	0	0.862069	0
2610020H08Rik	1.02041	7.14286	5.91716	3.52941	0.806452	0.702988	0.223214	0	3.0303	6.66667	4.95868	3.27869	3.57143	3.07692	1.36986	4.73373	3.40136	0	0	0
2610021K21Rik	12.2449	0	15.6805	7.05882	0	0.878735	0.892857	0	15.1515	19.1111	19.0083	6.55738	2.85714	0	0.456621	13.0178	11.5646	0	4.31034	3.22581
2610027L16Rik	31.6327	11.9048	20.7101	45.8824	4.83871	3.16344	16.7411	4.69799	42.4242	64.8889	48.7603	18.0328	44.2857	23.0769	11.4155	47.929	28.5714	9.09091	0.862069	29.0323
2610028E06Rik	0	0	0	0	0	0	0	0	0	0	0	0	0	0	0	0	0	0	0	0
2610028H24Rik	0	0	0	0	0	0	0	0	0	0	0	0	0	0	0	0	0	0	0	0
2610029G23Rik	48.9796	24.4048	41.4201	63.5294	3.22581	5.09666	21.6518	3.3557	56.5657	84.8889	73.5537	34.4262	55.7143	33.8462	22.8311	71.5976	54.4218	20	2.58621	64.5161
2610029I01Rik	15.3061	5.95238	3.5503	32.1569	0	1.05448	18.75	0.671141	30.303	18.6667	8.26446	6.55738	9.28571	4.61538	2.28311	8.87574	23.1293	9.09091	0.862069	6.45161
2610034B18Rik	0	0	0	0.392157	0	0	0	0	0	0	0	0	2.14286	0	0	0	0	0	0	0
2610034M16Rik	0	0	0	0	0	0	0	0	0	0	0	0	5	0	0	0	0	0	0	0
2610035D17Rik	9.18367	7.7381	0.295858	5.09804	2.41935	1.93322	3.57143	0	5.05051	4.88889	8.26446	4.91803	15	6.15385	9.13242	11.2426	2.04082	2.72727	3.44828	3.22581
2610035F20Rik	0	0	0	0	0	0	0	0	0	0	0	0	0	0	0	0	0	0	0	0
2610037D02Rik	0	0	10.355	0	0.806452	7.38137	0.446429	0.671141	0	2.22222	0.826446	0	0.714286	0	0	0.591716	0	0	0	3.22581
2610039C10Rik	51.0204	16.0714	65.9763	77.2549	4.03226	8.6116	21.6518	7.38255	90.9091	81.3333	66.1157	50.8197	43.5714	4.61538	10.9589	59.1716	38.0952	9.09091	2.58621	6.45161
2610044O15Rik	8.16327	4.7619	5.6213	7.84314	0	2.9877	5.58036	0.671141	5.05051	14.6667	8.26446	4.91803	7.85714	9.23077	2.28311	11.8343	2.72109	4.54545	0	3.22581
2610100L16Rik	0	0	0	0	0	0	0	0	0	0	0	0	0	0	0	0	0	0	0	0
2610101N10Rik	65.3061	35.119	59.4675	79.2157	7.25806	16.696	40.8482	1.34228	76.7677	92.8889	76.8595	45.9016	74.2857	47.6923	37.8995	69.8225	75.5102	42.7273	6.89655	51.6129
2610109H07Rik	0	0	0	0	0	0	0	0	0	0	0	0	0.714286	0	0.456621	0	0	0	0	0
2610203C20Rik	0	0	0	0	0	0	0	0	0	0	0	0	0	0	0	0	0	0	0	0
2610203C22Rik	0	0	0	0.784314	0	0	0.223214	0	0	0	0	0	0	0	0	0	0	0	0	0
2610204G22Rik	1.02041	0.595238	0.591716	0.392157	0	0.175747	0	0.671141	0	3.11111	0	0	3.57143	1.53846	0.913242	0.591716	0	1.81818	0	6.45161
2610206C17Rik	0	0	0	0	0	0	0	0	0	0	0	0	0	1.53846	0	0	0	0	0	0
2610301B20Rik	10.2041	4.16667	1.77515	5.4902	0	0.175747	2.67857	0	1.0101	26.6667	9.09091	13.1148	20	6.15385	3.65297	10.6509	12.2449	0	0.862069	3.22581
2610301G19Rik	11.2245	12.5	12.7219	20.7843	1.6129	3.33919	4.24107	0	19.1919	55.5556	22.314	11.4754	25.7143	13.8462	6.84932	33.1361	12.2449	10.9091	0	9.67742
2610305D13Rik	0	0	0	1.56863	0	0	0	0	0	5.77778	0	1.63934	5.71429	0	0	0	0.680272	0	0	0
2610306M01Rik	3.06122	3.57143	2.95858	7.05882	1.6129	2.28471	3.125	0.671141	3.0303	8	4.13223	1.63934	12.1429	6.15385	6.39269	8.28402	5.44218	1.81818	0	9.67742
2610307P16Rik	6.12245	0.595238	0.591716	0	0	1.75747	0	0.671141	0	2.22222	13.2231	1.63934	22.8571	20	0.913242	5.32544	0.680272	0.909091	0	3.22581
2610316D01Rik	0	0	0	0	0	0	0	0	0	0	0	0	0	0	0	0	0	0	0	0
2610318N02Rik	17.3469	0.595238	0.887574	16.0784	0	0.351494	0.223214	0.671141	2.0202	31.5556	45.4545	13.1148	17.8571	6.15385	0.913242	43.1953	10.2041	1.81818	0.862069	3.22581
2610507B11Rik	27.551	13.0952	18.3432	41.5686	2.41935	4.56942	20.5357	0.671141	38.3838	56.8889	29.7521	19.6721	45.7143	21.5385	23.2877	40.2367	29.2517	13.6364	0.862069	19.3548
2610507I01Rik	6.12245	3.57143	44.0828	16.0784	29.0323	30.0527	9.59821	2.68456	13.1313	56.8889	2.47934	18.0328	15	6.15385	3.19635	6.50888	9.52381	3.63636	2.58621	3.22581
2610524H06Rik	17.3469	9.52381	3.84615	32.549	0.806452	0.351494	7.8125	0.671141	13.1313	47.1111	9.91736	13.1148	39.2857	6.15385	17.3516	34.3195	21.0884	10.9091	2.58621	22.5806
2610528A11Rik	0	0	0.295858	0	0	0	0.446429	0	1.0101	4.88889	0	0	1.42857	0	0.456621	0	0	0	0	0
2610528E23Rik	6.12245	5.35714	4.73373	19.2157	0	0.351494	1.33929	0	5.05051	44.8889	14.0496	11.4754	21.4286	6.15385	3.19635	26.6272	17.6871	1.81818	0	6.45161
2610528J11Rik	0	0	0	0	0	0	0	0	0	0	0	0	4.28571	0	0	0	0	0	0	0
2700007P21Rik	7.14286	4.7619	13.6095	18.4314	2.41935	4.92091	5.13393	0.671141	15.1515	28.8889	6.61157	6.55738	15.7143	4.61538	7.76256	13.6095	6.80272	4.54545	0	9.67742
2700023E23Rik	8.16327	8.33333	5.91716	11.3725	1.6129	2.28471	2.67857	0.671141	3.0303	31.1111	4.13223	4.91803	23.5714	4.61538	9.13242	27.8107	12.9252	10.9091	1.72414	6.45161
2700029M09Rik	59.1837	28.5714	79.5858	79.2157	1.6129	10.3691	24.5536	7.38255	80.8081	94.2222	80.9917	42.623	69.2857	30.7692	38.3562	82.8402	81.6327	17.2727	10.3448	29.0323
2700038G22Rik	9.18367	4.7619	7.39645	20.7843	0	0.351494	2.67857	0	10.101	27.1111	13.2231	8.19672	20.7143	1.53846	6.84932	22.4852	10.2041	7.27273	0.862069	9.67742
2700046A07Rik	0	0	0	0	0	0	0	0	0	0.444444	0	0	0	0	0	0	0	0	0	0
2700046G09Rik	2.04082	0	0	1.17647	0	0.175747	0.446429	0	0	2.66667	0	0	4.28571	1.53846	4.10959	3.5503	0.680272	0	0	0
2700049A03Rik	15.3061	5.95238	13.6095	16.0784	0.806452	2.6362	4.46429	0.671141	16.1616	33.7778	34.7107	16.3934	22.8571	9.23077	7.30594	24.2604	18.3673	6.36364	6.03448	0
2700050L05Rik	6.12245	3.57143	7.69231	8.23529	0	2.28471	2.90179	0.671141	15.1515	14.2222	10.7438	3.27869	10.7143	6.15385	5.47945	14.7929	12.9252	2.72727	1.72414	9.67742
2700054A10Rik	0	0	0.295858	0.392157	0	0	0	0.671141	0	0.444444	0	0	0	0	0	0	0	0	0	0
2700060E02Rik	96.9388	76.7857	60.6509	94.5098	17.7419	27.768	85.4911	12.7517	95.9596	94.6667	85.9504	80.3279	97.1429	90.7692	88.5845	94.0828	65.3061	70	13.7931	93.5484
2700062C07Rik	19.3878	11.3095	5.91716	23.9216	0.806452	0.527241	7.36607	1.34228	25.2525	30.6667	19.8347	9.83607	16.4286	9.23077	13.6986	27.8107	16.3265	7.27273	0	29.0323
2700069I18Rik	0	0	0	0	0	0	0	0	0	0	0	0	0	0	0	0	0	0	0	0
2700070H01Rik	0	0	0	0	0	0	0	0	0	0	0	0	0	0	0	0	0	0	0	0
2700078E11Rik	21.4286	10.7143	11.2426	25.8824	4.83871	4.21793	13.8393	0.671141	28.2828	37.3333	13.2231	19.6721	21.4286	7.69231	10.9589	26.6272	11.5646	7.27273	1.72414	9.67742
2700081L22Rik	1.02041	0	0.591716	1.17647	0	0	0	0.671141	3.0303	1.33333	1.65289	0	1.42857	1.53846	0.456621	0.591716	4.08163	0	0	0
2700081O15Rik	0	0.595238	0	1.56863	0	0	0	0	0	0.888889	3.30579	0	2.85714	4.61538	0.456621	6.50888	0.680272	0	0	0
2700086A05Rik	0	0	0	0	0	0	0	0	0	2.22222	0	0	1.42857	0	0.456621	0	0	0	0	0
2700089E24Rik	38.7755	23.8095	24.5562	57.2549	0	2.46046	21.875	4.69799	34.3434	69.7778	7.43802	14.7541	62.8571	46.1538	36.0731	42.6036	21.0884	13.6364	0	54.8387
2700089I24Rik	0	0	0	0	0	0	0	0	0	0	0	0	0	0	0	0	0	0	0	0
2700090O03Rik	0	0	0	0	0	0	0	0	0	0	0	0	0	0	0	0	0	0	0	0
2700094K13Rik	82.6531	51.1905	72.7811	96.8627	0.806452	12.8295	50.6696	14.094	98.9899	98.6667	97.5207	67.2131	87.8571	40	39.726	86.9822	53.7415	38.1818	8.62069	41.9355
2700097O09Rik	1.02041	3.57143	3.84615	5.4902	0	0.527241	2.45536	13.4228	4.0404	22.6667	2.47934	13.1148	10.7143	3.07692	4.56621	11.2426	42.1769	3.63636	26.7241	16.129
2700099C18Rik	23.4694	1.19048	17.1598	14.902	0	0	0.669643	0.671141	27.2727	17.3333	20.6612	14.7541	9.28571	1.53846	5.02283	13.0178	12.9252	2.72727	0.862069	3.22581
2810001G20Rik	7.14286	13.0952	16.568	11.7647	4.03226	14.587	5.13393	1.34228	9.09091	27.5556	2.47934	16.3934	23.5714	7.69231	14.1553	15.9763	18.3673	1.81818	3.44828	6.45161
2810002D19Rik	12.2449	3.57143	6.80473	9.80392	4.83871	5.09666	6.25	1.34228	8.08081	17.3333	14.876	9.83607	12.8571	10.7692	7.76256	15.9763	4.08163	1.81818	1.72414	6.45161
2810002N01Rik	51.0204	15.4762	27.2189	58.8235	4.03226	6.85413	34.5982	2.68456	54.5455	73.7778	30.5785	24.5902	47.8571	26.1538	25.1142	50.2959	23.8095	24.5455	0.862069	22.5806
2810004N23Rik	24.4898	23.2143	23.9645	45.8824	0	3.86643	14.5089	2.68456	33.3333	80.4444	19.0083	22.9508	46.4286	20	19.1781	47.3373	29.2517	19.0909	2.58621	22.5806
2810006K23Rik	14.2857	9.52381	11.8343	19.2157	0.806452	1.40598	5.58036	0.671141	24.2424	38.6667	24.7934	9.83607	35.7143	13.8462	9.13242	22.4852	15.6463	5.45455	0	9.67742
2810007J24Rik	0	0.595238	0	0	0	0	0	0	0	0	0	0	0	0	0	0	0	0	0	0
2810008D09Rik	15.3061	4.7619	6.80473	15.2941	0	1.05448	5.35714	1.34228	5.05051	21.3333	7.43802	8.19672	20.7143	3.07692	10.5023	13.0178	13.6054	4.54545	0	6.45161
2810008M24Rik	47.9592	25.5952	41.716	61.5686	15.3226	14.2355	28.5714	2.01342	48.4848	56	52.0661	40.9836	52.1429	32.3077	43.379	54.4379	42.8571	22.7273	3.44828	22.5806
2810011L19Rik	0	0	0	0	0	0	0	0	0	0	0	0	0	0	0	0	0	0	0	0
2810013P06Rik	72.449	33.3333	25.7396	76.4706	11.2903	18.2777	65.8482	9.39597	80.8081	53.7778	61.9835	21.3115	68.5714	43.0769	61.6438	63.3136	46.9388	47.2727	36.2069	38.7097
2810021B07Rik	41.8367	26.7857	48.8166	68.2353	9.67742	17.9262	34.375	8.05369	61.6162	85.7778	55.3719	67.2131	70.7143	46.1538	34.2466	67.4556	48.2993	26.3636	5.17241	45.1613
2810021J22Rik	2.04082	2.38095	2.95858	2.7451	1.6129	0.702988	1.78571	0	0	4	4.95868	1.63934	1.42857	0	1.82648	2.95858	3.40136	2.72727	0	3.22581
2810025M15Rik	21.4286	2.38095	6.21302	32.549	0	1.05448	6.02679	2.68456	32.3232	50.2222	18.1818	19.6721	52.1429	44.6154	18.2648	41.4201	10.8844	3.63636	0.862069	6.45161
2810029C07Rik	0	0	0.295858	1.56863	0	0	0.223214	0	1.0101	1.33333	0.826446	0	0.714286	0	0.913242	0	0	0	0.862069	0
2810030E01Rik	0	0	0	0	0	0	0	0	0	0.888889	0.826446	0	0	0	0	1.18343	0	0	0	0
2810032G03Rik	0	0	0	0	0	0	0	0	0	0	0	0	0	0	0	0	0	0	0	0
2810046L04Rik	8.16327	4.16667	5.6213	12.1569	0.806452	2.6362	7.36607	0.671141	13.1313	18.2222	15.7025	13.1148	13.5714	9.23077	5.47945	21.8935	12.9252	2.72727	0	0
2810047C21Rik1	0	0.595238	0.591716	0	0	0	0.446429	0	0	0.444444	0.826446	0	0.714286	1.53846	0.913242	1.18343	0	0	0	0
2810049E08Rik	0	0	0	0	0	0	0	0	0	0	0	0	0	0	0	0	0	0	0	0
2810055F11Rik	1.02041	0	0	0.784314	0	0	0.223214	0	1.0101	2.66667	0	0	0.714286	0	0.456621	0.591716	0	0	0	0
2810055G20Rik	0	0	0	1.17647	0	0	1.11607	0	0	2.22222	0	1.63934	7.85714	0	0	0.591716	0	0	0	0
2810403A07Rik	19.3878	5.35714	9.46746	13.7255	6.45161	4.56942	8.25893	0.671141	13.1313	23.5556	10.7438	6.55738	22.8571	12.3077	6.39269	27.2189	13.6054	10	0	9.67742
2810403D21Rik	1.02041	1.19048	0.591716	3.13725	0	0.351494	1.5625	0	1.0101	8.44444	2.47934	6.55738	10.7143	3.07692	1.82648	5.32544	9.52381	5.45455	2.58621	6.45161
2810404M03Rik	0	0	0	0	0	0	0	0	0	0	0	0	0	0	0	0	0	0	0	0
2810405F15Rik	0	0	0	0	0	0	0	0	0	0	0	0	0	0	0	0	0	0	0	0
2810405K02Rik	7.14286	2.97619	4.14201	26.2745	1.6129	1.05448	11.1607	8.72483	28.2828	19.1111	0.826446	1.63934	7.14286	1.53846	2.73973	3.5503	4.08163	1.81818	0.862069	6.45161
2810407C02Rik	77.551	35.7143	74.2604	81.9608	31.4516	37.0826	64.2857	22.1477	84.8485	91.5556	77.686	62.2951	67.1429	44.6154	75.3425	69.8225	58.5034	42.7273	34.4828	74.1935
2810408A11Rik	4.08163	0	2.07101	2.35294	0	0.878735	0.892857	0	0	6.66667	8.26446	4.91803	10.7143	0	0	4.14201	1.36054	0	0	0
2810408I11Rik	9.18367	3.57143	38.4615	25.8824	0.806452	2.46046	0.446429	1.34228	11.1111	63.5556	14.0496	8.19672	16.4286	0	0.456621	18.9349	25.8503	1.81818	0	3.22581
2810408M09Rik	16.3265	10.119	3.84615	18.4314	0	0.527241	7.58929	0	8.08081	29.7778	14.0496	8.19672	27.1429	13.8462	13.6986	23.0769	10.2041	6.36364	0	3.22581
2810410L24Rik	0	0	0	0	0	0	0	0	0	0.888889	0	0	2.85714	0	0	0.591716	0.680272	0	0	0
2810417H13Rik	57.1429	7.14286	98.5207	85.8824	4.03226	9.13884	8.25893	11.4094	98.9899	85.3333	99.1736	39.3443	47.1429	10.7692	6.84932	82.8402	88.4354	8.18182	12.069	9.67742
2810422J05Rik	70.4082	33.3333	30.1775	65.098	4.83871	9.13884	53.125	4.02685	72.7273	83.1111	29.7521	52.459	67.1429	20	34.2466	46.1538	31.9728	31.8182	5.17241	22.5806
2810422O20Rik	2.04082	4.7619	1.18343	3.13725	0	0.175747	2.23214	0.671141	2.0202	11.5556	6.61157	6.55738	7.14286	0	0.913242	2.36686	2.04082	6.36364	0	6.45161
2810428I15Rik	65.3061	35.7143	61.8343	88.2353	6.45161	20.3866	54.6875	10.0671	90.9091	92	61.157	62.2951	72.8571	30.7692	34.7032	60.355	46.2585	30	13.7931	64.5161
2810429I04Rik	0	0	0	0	0	0	0	0	0	0	0.826446	0	0.714286	0	0	1.77515	0	0	0	0
2810432D09Rik	36.7347	10.119	31.6568	50.1961	5.64516	10.0176	22.7679	2.68456	43.4343	60.8889	51.2397	22.9508	40.7143	32.3077	23.2877	52.6627	40.1361	10.9091	3.44828	19.3548
2810432L12Rik	0	0	0	0	0	0	0	0	0	0	0	0	5.71429	0	0	0	8.16327	0	0	0
2810433D01Rik	0	0	0	0	0	0	0	0	0	0	0	0	0	0	0	0	0	0	0	0
2810442I21Rik	1.02041	0	1.77515	0.392157	0.806452	0	0	0	3.0303	0.888889	2.47934	3.27869	0.714286	0	18.2648	1.77515	5.44218	0	0.862069	0
2810442N19Rik	0	0	2.36686	0	0.806452	1.75747	1.5625	0	0	3.11111	0	0	1.42857	1.53846	0	0	0	0.909091	0	0
2810453I06Rik	9.18367	12.5	8.28402	22.3529	0.806452	2.28471	8.03571	95.9732	18.1818	32.8889	9.91736	9.83607	25.7143	7.69231	10.5023	19.5266	47.619	7.27273	78.4483	19.3548
2810454H06Rik	8.16327	6.54762	8.57988	12.1569	1.6129	1.93322	5.35714	2.68456	10.101	18.2222	21.4876	6.55738	10.7143	10.7692	6.84932	17.7515	20.4082	5.45455	25	3.22581
2810459M11Rik	0	0	0	0	0	0	0	0	0	0	0	0	0	0	0	0	0	0	0	0
2810468N07Rik	3.06122	0.595238	0	0.392157	0	0	0.892857	0	0	0.888889	0.826446	0	3.57143	0	5.02283	1.77515	0	0	0	3.22581
2810471M01Rik	0	0	0	0	0	0	0	0	0	0	0	0	0	0	0	0	0	0	0	0
2810474O19Rik	36.7347	40.4762	34.3195	51.3725	47.5806	26.362	39.9554	10.0671	64.6465	40.8889	45.4545	36.0656	51.4286	26.1538	31.5068	46.1538	57.8231	32.7273	44.8276	22.5806
2900002K06Rik	0	0.595238	0.591716	2.35294	0.806452	0	0.223214	0	1.0101	1.77778	4.13223	1.63934	2.14286	1.53846	0.456621	2.95858	2.04082	0	0	3.22581
2900005J15Rik	5.10204	5.35714	1.18343	7.84314	0	0	2.00893	0.671141	6.06061	4.88889	0	0	10	0	4.56621	1.18343	1.36054	3.63636	0	0
2900006K08Rik	0	0.595238	2.36686	1.96078	0.806452	0.351494	0.223214	0	0	4.88889	1.65289	3.27869	0.714286	0	0	0.591716	0.680272	0.909091	0	0
2900008C10Rik	5.10204	10.119	9.46746	10.5882	0.806452	5.44815	3.125	0.671141	4.0404	20	4.13223	36.0656	10	10.7692	15.5251	7.10059	0	6.36364	1.72414	3.22581
2900009J06Rik	0	0	0.591716	0	0	0.175747	0	0	0	0	0.826446	0	0.714286	0	0	0.591716	0.680272	0	0.862069	0
2900010M23Rik	76.5306	48.2143	39.3491	91.3725	4.83871	9.66608	60.4911	6.71141	90.9091	90.2222	70.2479	52.459	83.5714	47.6923	57.5342	74.5562	46.9388	40.9091	2.58621	93.5484
2900011O08Rik	0	0	0	0.392157	0	0	0	0	0	0.888889	0	0	0	0	0	0	0	0	0	0
2900026A02Rik	1.02041	1.78571	0	0	0	0.175747	0.446429	0	0	0	2.47934	0	7.85714	33.8462	0.456621	21.8935	0.680272	0.909091	0	0
2900041M22Rik	4.08163	1.78571	0	1.17647	0	0.351494	0.223214	0	2.0202	0.888889	0	0	5	0	4.10959	0.591716	0	0.909091	0	0
2900052N01Rik	0	0	0	0	0	0	0	0	0	0	0	0	0	0	0	0	0	0	0	0
2900053A13Rik	73.4694	40.4762	84.3195	84.7059	70.1613	65.0264	59.1518	27.5168	85.8586	93.3333	61.9835	63.9344	65	52.3077	64.3836	62.1302	72.7891	42.7273	40.5172	74.1935
2900055J20Rik	0	0	0	0	0	0	0	0	0	0	0	0	0	0	0	0	0	0	0	0
2900056M20Rik	8.16327	2.38095	2.95858	7.45098	1.6129	0.527241	3.125	0	10.101	7.11111	4.13223	3.27869	7.14286	6.15385	8.21918	4.14201	2.04082	0	0.862069	0
2900057B20Rik	0	0	0	0	0	0	0	0	0	0	0	0	0	0	0	0	0	0	0	0
2900060B14Rik	9.18367	6.54762	10.9467	7.45098	0.806452	4.21793	4.24107	0.671141	4.0404	21.7778	13.2231	9.83607	10	13.8462	4.10959	18.9349	4.08163	8.18182	0.862069	9.67742
2900064A13Rik	62.2449	27.381	53.8462	77.2549	15.3226	17.0475	51.5625	2.68456	86.8687	90.2222	48.7603	60.6557	60.7143	35.3846	44.2922	50.2959	50.3401	21.8182	6.03448	77.4194
2900076A07Rik	3.06122	0.595238	2.66272	3.92157	0.806452	1.40598	2.67857	0.671141	3.0303	7.11111	4.13223	4.91803	4.28571	7.69231	1.82648	7.69231	4.7619	0.909091	0	3.22581
2900079G21Rik	1.02041	0	0	0	0	0	0	0	0	0	0.826446	0	0	0	0	1.18343	0	0	0	0
2900092C05Rik	0	0	0	0	0	0	0	0	0	0	0	0	0	0	0	0	0	0	0	0
2900092D14Rik	0	0	0	0	0	0	0	0	0	0	0	0	0	0	0	0	0	0	0	0
2900092E17Rik	51.0204	20.2381	69.8225	69.0196	16.9355	13.5325	33.0357	5.36913	79.798	83.5556	68.595	50.8197	61.4286	24.6154	43.8356	63.3136	42.8571	26.3636	3.44828	19.3548
2900093L17Rik	0	0	0	0	0	0	0	0	0	0	0	0	0	0	0	0	0	0	0	0
2900097C17Rik	38.7755	19.0476	31.9527	54.5098	6.45161	14.587	32.8125	8.05369	51.5152	78.2222	27.2727	26.2295	60	23.0769	31.5068	43.787	29.932	11.8182	5.17241	25.8065
3000002C10Rik	2.04082	0	1.47929	4.31373	0	0.527241	0	0	1.0101	6.22222	0.826446	0	3.57143	0	0.456621	2.36686	1.36054	0.909091	0	6.45161
3010001F23Rik	0	0	0	0	0	0	0	0	0	0.444444	0	0	0	0	0	0	0	0	0	0
3010026O09Rik	6.12245	2.97619	7.98817	16.0784	0.806452	0.702988	1.33929	0.671141	14.1414	24.8889	13.2231	3.27869	10.7143	3.07692	1.82648	15.3846	12.2449	0.909091	1.72414	0
3100003L05Rik	0	0	0	0	0	0	0	0	0	0	0	0	0	0	0	0	0	0	0	0
3110001D03Rik	70.4082	45.2381	34.9112	76.8627	5.64516	12.8295	52.9018	6.04027	71.7172	92	42.9752	39.3443	79.2857	41.5385	51.5982	63.9053	34.6939	36.3636	0.862069	64.5161
3110001I22Rik	4.08163	2.38095	2.66272	6.66667	0.806452	1.40598	1.78571	0.671141	7.07071	12	4.13223	1.63934	2.85714	4.61538	1.36986	5.32544	3.40136	1.81818	0	0
3110002H16Rik	12.2449	7.7381	12.426	17.2549	11.2903	7.55712	10.0446	21.4765	11.1111	18.6667	11.5702	13.1148	15	6.15385	8.21918	8.87574	25.8503	9.09091	31.8966	32.2581
3110003A17Rik	96.9388	72.0238	98.2249	98.8235	69.3548	90.5097	95.0893	29.5302	96.9697	98.6667	87.6033	86.8852	97.1429	73.8462	87.6712	95.2663	40.1361	63.6364	12.069	96.7742
3110007F17Rik	1.02041	0	0.591716	1.96078	0	0	0.223214	0	1.0101	3.11111	4.95868	0	3.57143	1.53846	0.913242	3.5503	5.44218	0	0	0
3110009E18Rik	8.16327	8.92857	1.18343	14.5098	0	0.702988	6.47321	0	23.2323	19.1111	19.8347	11.4754	20	7.69231	7.30594	20.7101	6.80272	4.54545	0.862069	9.67742
3110009F21Rik	0	0	0	0	0	0	0	0	0	0	0	0	0	0	0	0	0	0	0	0
3110015C05Rik	0	0	0	0	0	0	0	0	0	0	0	0	0	0	0	0	0	0	0	0
3110021A11Rik	3.06122	0	1.18343	0.784314	0	0.175747	0.223214	0	0	3.11111	0	0	5.71429	1.53846	0	0	3.40136	0.909091	0	0
3110021N24Rik	0	0	0	0	0	0	0.446429	0	1.0101	0	0	0	0	0	0	0	0	0	0	0
3110035E14Rik	0	0	0	0	0	0	0	0	0	0	0	0	0	0	0	0	0	0	0	0
3110039I08Rik	0	0	0	0	0	0.175747	0	0	0	0	0	0	0	0	0	0	0	0	0	0
3110039M20Rik	0	0	0	0	0	0	0	0	0	0	0	0	0	0	0	0	0	0	0	0
3110040N11Rik	30.6122	18.4524	20.1183	34.1176	3.22581	4.04218	14.2857	0	29.2929	62.2222	19.8347	24.5902	39.2857	16.9231	23.2877	36.6864	26.5306	19.0909	0.862069	25.8065
3110043O21Rik	8.16327	0	2.07101	4.70588	1.6129	0.878735	4.46429	0.671141	14.1414	0.888889	4.13223	0	5	1.53846	0.913242	1.18343	4.7619	0.909091	0	12.9032
3110045C21Rik	3.06122	0	3.84615	1.96078	0	0.351494	0.446429	0	2.0202	2.66667	10.7438	3.27869	1.42857	0	0	8.28402	2.72109	0	0	0
3110047P20Rik	0	0	0	0	0	0	0	0	0	0	0	0	0	0	0.456621	0	0	0	0	0
3110052M02Rik	9.18367	3.57143	2.66272	5.88235	0.806452	1.75747	4.91071	0	6.06061	14.2222	14.876	11.4754	7.14286	7.69231	7.30594	9.46746	3.40136	2.72727	0	3.22581
3110056K07Rik	10.2041	3.57143	4.73373	8.23529	1.6129	2.46046	3.34821	2.01342	9.09091	15.5556	4.13223	13.1148	20	10.7692	7.30594	12.426	5.44218	10	1.72414	3.22581
3110056O03Rik	5.10204	2.97619	3.84615	12.1569	0.806452	1.58172	6.47321	3.3557	9.09091	26.2222	6.61157	8.19672	15.7143	3.07692	11.4155	8.87574	68.7075	5.45455	50	3.22581
3110057O12Rik	1.02041	0	1.18343	0.392157	0	0.351494	1.33929	1.34228	3.0303	3.55556	3.30579	6.55738	2.85714	1.53846	1.36986	1.77515	1.36054	0	3.44828	0
3110062M04Rik	9.18367	4.16667	21.3018	17.6471	7.25806	20.5624	8.25893	4.02685	10.101	23.5556	6.61157	19.6721	36.4286	18.4615	16.895	18.3432	13.6054	5.45455	0.862069	9.67742
3110070M22Rik	0	0	0.591716	1.17647	0	0	0.669643	0	2.0202	0.888889	1.65289	0	1.42857	0	0.913242	0	0.680272	0	0	0
3110079O15Rik	0	0	0	0	0	0	0	0	1.0101	0	0	0	0	0	0	0	0	0	0	0
3110082D06Rik	0	0	0	0	0	0	0	0	0	0	0	0	0	0	0	0	0	0	0	0
3110082I17Rik	4.08163	1.19048	2.66272	15.6863	0.806452	0.878735	12.2768	0	11.1111	36.4444	1.65289	4.91803	16.4286	1.53846	2.28311	18.9349	8.84354	0.909091	0	6.45161
3110082J24Rik	0	0	0	0	0	0	0	0	0	0	0	0	0	0	0	0	0	0	0	0
3110099E03Rik	0	0	0	0	0	0	0	0	0	0	0	0	0	0	0	0	0	0	0	0
3200001D21Rik	0	0	0	0	0	0	0	0	0	0	0	0	0	0	0	0	0	0	0	0
3200002M19Rik	44.898	11.9048	50.5917	63.1373	4.03226	9.31459	16.5179	2.68456	66.6667	72.4444	55.3719	29.5082	41.4286	15.3846	11.8721	57.3964	46.2585	17.2727	7.75862	29.0323
3230401D17Rik	51.0204	18.4524	51.7751	72.549	16.9355	9.31459	26.3393	2.68456	57.5758	79.5556	46.281	44.2623	65	27.6923	31.0502	63.3136	27.8912	15.4545	9.48276	38.7097
3300002I08Rik	0	0	0.295858	1.17647	0	0	0.223214	0	1.0101	0.888889	0.826446	0	0.714286	1.53846	0.456621	1.77515	0	0	0	0
3300005D01Rik	6.12245	1.19048	0.887574	6.27451	0	0	2.00893	0	0	7.11111	0	0	4.28571	1.53846	5.47945	5.32544	3.40136	0.909091	0	0
3425401B19Rik	0	0	0	0	0	0	0	0	0	0	0	0	0	0	0	0	0	1.81818	0	0
3632451O06Rik	0	0	0	0	0	0	0	0	0	0	0	0	0.714286	0	0	0	0	0	0	0
3632454L22Rik	0	0	0	0	0	0	0	0	0	0	0	0	0	0	0	0	0	0	0	0
3830403N18Rik	1.02041	0.595238	0.887574	1.56863	0.806452	0.878735	0	0.671141	5.05051	2.66667	0	0	1.42857	0	0.456621	0	0.680272	0	0	0
3830406C13Rik	30.6122	14.2857	16.2722	40.7843	2.41935	8.26011	24.1071	3.3557	38.3838	54.2222	14.0496	21.3115	38.5714	20	23.7443	24.2604	22.449	10	0.862069	32.2581
3830408C21Rik	1.02041	0.595238	0	0	0	0	0	0	0	0	0	0	0.714286	0	0	0.591716	0	0	0	0
3830417A13Rik	0	0	0	0	0	0	0	0	0	0	0	0	0	0	0	0	0	0	0	0
3830431G21Rik	0	0	0	0	0	0	0	0	0	0	0	0	0.714286	0	0	0	0.680272	0	0	0
3930402G23Rik	0	0	0	0	0	0	0	0	0	0	0.826446	0	0	1.53846	0	0.591716	0	0	0	0
4430402I18Rik	0	0.595238	0	1.17647	0	0.351494	0.669643	0	0	0	1.65289	0	0	0	0.456621	0	0	0	0	0
4632411B12Rik	11.2245	8.33333	8.57988	19.6078	0	2.28471	8.70536	0.671141	13.1313	22.2222	12.3967	9.83607	15.7143	12.3077	7.76256	17.7515	13.6054	4.54545	0.862069	12.9032
4632415K11Rik	0	1.19048	0	0	0	0	0	0	0	0	0	0	0	0	0	0	0	0	0	0
4632415L05Rik	5.10204	1.78571	3.25444	9.41176	0	0.878735	4.24107	4.02685	5.05051	19.1111	14.0496	3.27869	15	1.53846	3.65297	14.7929	3.40136	3.63636	0.862069	0
4632427E13Rik	6.12245	4.7619	5.32544	5.88235	2.41935	2.9877	3.79464	0.671141	5.05051	13.3333	7.43802	4.91803	12.1429	4.61538	9.13242	7.69231	9.52381	5.45455	8.62069	3.22581
4632428C04Rik	1.02041	0	0	0	0	0	0.446429	0	0	0	0	0	1.42857	6.15385	0	0.591716	0	0	0	0
4632428N05Rik	51.0204	42.2619	94.0828	91.7647	91.129	83.4798	92.1875	21.4765	100	86.2222	7.43802	52.459	27.1429	12.3077	40.6393	7.10059	32.6531	17.2727	19.8276	70.9677
4632434I11Rik	10.2041	0.595238	11.5385	12.549	0	0.351494	0.223214	0.671141	17.1717	17.3333	14.0496	6.55738	7.14286	1.53846	0	9.46746	29.932	0	2.58621	0
4732415M23Rik	0	0	0	0	0	0	0	0	0	0	0	0	0	0	0	0	0	0	0	0
4732416N19Rik	0	0	0.295858	0	0	0	0	0	0	0.888889	0	0	0	0	0	0	0	0	0	0
4732418C07Rik	23.4694	15.4762	24.2604	24.3137	8.06452	13.3568	10.7143	1.34228	26.2626	44.4444	19.8347	18.0328	38.5714	15.3846	25.5708	34.3195	27.8912	7.27273	5.17241	29.0323
4732456N10Rik	0	0	0	0	0	0	0	0	0	0	0	0	0	0	0	0	0	0	0	0
4732471D19Rik	1.02041	2.38095	0.887574	2.7451	0	0.351494	0.892857	0	0	4	4.95868	1.63934	11.4286	3.07692	1.36986	6.50888	2.04082	0.909091	0	3.22581
4732471J01Rik	0	0	0	2.35294	0	0	0.446429	0	1.0101	0.888889	0.826446	1.63934	3.57143	0	0	0	0	0	0	0
4732490B19Rik	0	0	0	0	0	0	0	0	0	0	0	0	0	0	0	0	0	0	0	0
4732491K20Rik	1.02041	1.78571	0	0.784314	0	0	0.223214	0	0	0.888889	4.95868	0	1.42857	4.61538	0.913242	1.77515	0	0	0	0
4831426I19Rik	6.12245	1.19048	4.14201	9.41176	0	0.351494	2.90179	0.671141	13.1313	5.33333	9.91736	3.27869	2.14286	1.53846	1.36986	10.0592	6.80272	2.72727	0	0
4831440E17Rik	6.12245	2.97619	1.18343	3.92157	0	0.351494	2.23214	0.671141	5.05051	2.66667	2.47934	1.63934	7.85714	0	2.28311	2.95858	1.36054	1.81818	0.862069	3.22581
4832428D23Rik	0	0	0	0	0	0	0	0	0	0	0	0	0	0	0	0	0	0	0	0
4833403I15Rik	0	0	0	0	0	0	0	0	0	0	0	0	0	0	0	0	0	0	0	0
4833412C05Rik	0	0	0	0	0	0	0	0	0	0	0	0	0	0	0	0	0	0	0	0
4833417C18Rik	3.06122	1.19048	0.591716	2.7451	0	0.351494	0.892857	1.34228	1.0101	9.77778	2.47934	0	7.85714	1.53846	1.36986	6.50888	12.2449	1.81818	0.862069	3.22581
4833418N02Rik	2.04082	0	1.18343	3.13725	1.6129	0.527241	1.78571	0	3.0303	8.44444	4.95868	1.63934	7.85714	0	3.19635	3.5503	2.72109	1.81818	0	6.45161
4833419F23Rik	2.04082	1.19048	0.591716	4.31373	0.806452	1.23023	3.57143	0	8.08081	0	0.826446	0	2.85714	0	1.82648	0.591716	0	0.909091	0	0
4833420G17Rik	22.449	12.5	22.1893	36.0784	7.25806	8.43585	16.7411	10.0671	43.4343	46.6667	30.5785	22.9508	40	30.7692	19.6347	42.6036	36.0544	11.8182	20.6897	12.9032
4833422C13Rik	0	0	0	0	0	0	0	0	0	0	0	0	0	0	0	0	0	0	0	0
4833423E24Rik	0	0	0	0	0	0	0	0	0	0	0	0	0	0	0	0	0	0	0	0
4833424O15Rik	0	0	0	0	0	0	0	0	0	0	0	0	0	0	0	0	0	0	0	0
4833427F10Rik	0	0	0	0	0	0	0.223214	0	0	0	0	0	0	0	0	0	0	0	0	0
4833427G06Rik	0	0	0	0	0	0	0	0	0	0	0	0	0	0	0	0	0	0	0	0
4833428L15Rik	0	0	0	0	0	0	0	0	0	0	0	0	0	0	0	0	0	0	0	0
4833439L19Rik	29.5918	5.95238	28.9941	45.098	9.67742	10.7206	24.3304	9.39597	42.4242	53.3333	44.6281	19.6721	33.5714	18.4615	19.6347	44.3787	32.6531	16.3636	7.75862	19.3548
4833442J19Rik	2.04082	7.7381	2.95858	5.09804	0	0.351494	3.57143	2.01342	3.0303	11.5556	1.65289	3.27869	12.8571	3.07692	0.456621	5.91716	4.08163	1.81818	12.931	0
4921501E09Rik	0	0	0	0	0	0	0	0	0	0	0	0	0	0	0	0	0	0	0	0
4921504E06Rik	0	0.595238	0	0	0	0	0	0	0	0	0	0	0	0	0	0	0	0	0	0
4921506M07Rik	0	0	0	0	0	0	0	0	0	0	0	0	0	0	0	0	0	0	0	0
4921507L20Rik	0	0	0	0	0	0	0	0	0	0	0	0	0	0	0	0	0	0	0	0
4921507P07Rik	0	0	3.5503	0	0	1.05448	0.223214	0	0	7.55556	0	1.63934	0.714286	0	0.456621	0	0	0	0	0
4921508A21Rik	0	0	0	0.392157	0	0	0	0	0	0	0	0	0	0	0	0	0	0	0	0
4921508D12Rik	0	0	0	0	0	0	0	0	0	0	0	0	0	0	0	0	0	0	0	0
4921509C19Rik	0	0	0	0	0	0	0	0	0	0	0	0	0	0	0	0	0	0	0	0
4921509O07Rik	0	0	0	0	0	0	0	0	0	0	0	0	0	0	0	0	0	0	0	0
4921510H08Rik	0	0	0	0	0	0	0	0	0	0	0	0	0	0	0	0	0	0	0	0
4921511C10Rik	0	0	0	0.392157	0	0.351494	0	0	0	0	0	0	0	0	0.456621	0	0	0	0	0
4921511C20Rik	0	0	0	0	0	0	0	0	0	0	0	0	0	0	0	0	0	0	0	0
4921511H03Rik	0	0	0	0	0	0	0	0	0	0	0	0	0	0	0	0	0	0	0	0
4921511I17Rik	0	0	0	0	0	0	0	0	0	0	0	0	0	0	0	0	0	0	0	0
4921511M17Rik	0	0	0	0	0	0	0	0	0	0	0	0	0	0	0	0	0	0	0	0
4921513D23Rik	24.4898	12.5	18.3432	23.9216	4.03226	9.13884	11.8304	8.72483	29.2929	30.6667	20.6612	22.9508	29.2857	16.9231	16.895	28.9941	27.8912	15.4545	17.2414	16.129
4921513I03Rik	0	0	0	0	0	0	0	0	0	0	0	0	0	0	0	0	0	0	0	0
4921515E04Rik	0	0	0	0	0	0	0	0	0	0	0.826446	0	0	0	0	0	0	0	0	0
4921515J06Rik	0	0	0	0	0	0	0	0	0	0	0	0	0	0	0	0	0	0	0	0
4921517D21Rik	0	0	0	0	0	0	0	0	0	0	0	0	0	0	0	0	0	0	0	0
4921517D22Rik	0	0	0	0	0	0	0	0	0	0	0	0	0	0	0	0	0	0	0	0
4921517L17Rik	4.08163	0	3.84615	5.88235	0	1.58172	1.5625	0	7.07071	5.33333	0.826446	1.63934	4.28571	1.53846	0.913242	1.18343	0	0.909091	0	3.22581
4921523A10Rik	0	0	0	0	0	0	0	0	1.0101	0.444444	0	0	0	0	0	0	1.36054	0	0	0
4921524J17Rik	28.5714	14.2857	33.432	38.8235	7.25806	8.26011	16.9643	2.01342	41.4141	67.1111	56.1983	45.9016	55.7143	46.1538	15.5251	54.4379	21.7687	11.8182	2.58621	25.8065
4921524L21Rik	0	0	0	0	0	0	0	0	0	0	0	0	0	0	0	0	0	0	0	0
4921525B02Rik	0	0	0	0	0	0	0	0	0	0	0	0	0	0	0	0	0	0	0	0
4921525O09Rik	0	0	0	0	0	0	0	0	0	0.444444	0	0	0	0	0	1.18343	0	0	0	0
4921528I01Rik	0	0	0	0	0	0	0	0	0	0	0	0	0	0	0	0	0	0	0	0
4921528O07Rik	0	0	0	0	0	0	0	0	0	0	0	0	0	0	0	0	0	0	0	0
4921530D09Rik	0	0	0	0	0	0	0	0	0	0	0	0	0	0	0	0	0	0	0	0
4921530L18Rik	1.02041	0.595238	1.47929	5.88235	1.6129	0.351494	0.446429	0	4.0404	3.55556	7.43802	4.91803	2.85714	3.07692	0.456621	6.50888	2.72109	0.909091	1.72414	0
4921530L21Rik	0	0	0	0	0	0	0	0	0	0	0	0	0	0	0	0	0	0	0	0
4921531C22Rik	19.3878	7.7381	7.98817	11.7647	3.22581	3.33919	4.01786	0.671141	7.07071	14.6667	18.1818	6.55738	18.5714	12.3077	15.0685	16.568	7.48299	9.09091	1.72414	19.3548
4921531P14Rik	0	0	0	0	0	0	0	0	0	0	0	0	0	0	0	0	0	0	0	0
4921533I20Rik	0	0	0	0	0	0	0	0	0	0	0	0	0	0	0	0	0	0	0	0
4921536K21Rik	1.02041	0	0	0.392157	0	0	0.223214	0	0	0.888889	0.826446	0	0	0	0	0.591716	0	0	0	0
4921539E11Rik	0	0	0	0	0	0	0	0	0	0	0	0	0	0	0	0	0	0	0	0
4922501C03Rik	13.2653	7.14286	8.87574	13.7255	0.806452	0.702988	6.02679	0.671141	15.1515	22.6667	8.26446	1.63934	17.1429	3.07692	7.76256	15.3846	12.2449	7.27273	0	9.67742
4922501L14Rik	0	0	0	0	0	0	0.223214	0	0	0	0	0	0	0	0	0	0	0	0	0
4922502D21Rik	0	0	0.295858	0	0	0.175747	0	0	0	0	0	0	0	4.61538	0	0.591716	0	0	0	0
4922502H24Rik	0	0	0	0	0	0	0	0	0	0	0	0	0	0	0	0	0	0	0	0
4922502N22Rik	0	0	0	0	0	0	0	0	0	0	0	0	0	0	0	0	0	0	0	0
4922505E12Rik	0	0	0	0	0	0	0	0	0	0	0	0	0	0	0	0	0	0	0	0
4922505G16Rik	1.02041	0	0	0	0	0	0.223214	0	0	1.33333	0	0	0	0	0	0	0	0	0	0
4930401C15Rik	0	0	0	0	0	0	0	0	0	0	0	0	0	0	0	0	0	0	0	0
4930401O10Rik	0	0	0	0	0	0	0	0	0	0	0	0	0	0	0	0	0	0	0	0
4930401O12Rik	0	0	0	0	0	0	0	0	0	0	0	0	0	0	0	0	0	0	0	0
4930402F06Rik	0	0	0	0	0	0	0	0	0	0	0	0	0	0	0	0	0	0	0	0
4930402F11Rik	0	0	0	0	0	0	0	0	0	0	0	0	0	0	0	0	0	0	0	0
4930402H24Rik	3.06122	1.19048	2.66272	4.70588	1.6129	2.10896	2.00893	0	10.101	4.88889	5.78512	1.63934	3.57143	6.15385	5.02283	1.77515	7.48299	0.909091	0	0
4930403N07Rik	0	0	0	0	0	0	0	0	0	0	0	0	0	0	0	0	0	0	0	0
4930404A05Rik	0	0	0	0	0	0	0	0	0	0	0	0	0	0	0	0	0	0	0	0
4930404A10Rik	0	0	0	0	0	0	0	0	0	0	0	0	0	0	0	0	0	0	0	0
4930404H11Rik	0	0	0	0	0	0	0	0	0	0	0	0	0	0	0	0	0	0	0	0
4930404H21Rik	0	0	0	0	0	0	0	0	0	0	0	0	0	0	0	0	0	0	0	0
4930404I05Rik	0	0	0.591716	0.784314	0	0	0	0	1.0101	0	0	0	0	0	0	0	0	0	0	0
4930404N11Rik	0	0.595238	1.47929	1.56863	0	0	0.223214	0.671141	4.0404	0.444444	5.78512	1.63934	1.42857	0	0	2.36686	3.40136	0	6.03448	0
4930405A10Rik	0	0	0	0	0	0	0	0	0	0	0	0	0	0	0	0	0	0	0	0
4930405A21Rik	0	0	0.887574	0	0	0.175747	0.223214	0	0	0.888889	0	0	0	0	0	0	0.680272	0	0	0
4930405D11Rik	0	0	0	0	0	0	0	0	0	0	0	0	0	0	0	0	0	0	0	0
4930405J17Rik	0	0	0	0	0	0	0	0	0	0	0	0	0	0	0	0	0	0	0	0
4930405P13Rik	0	0	0	0	0	0	0	0	0	0	0	0	0	0	0	0	0	0	0	0
4930406D18Rik	0	0	0	0	0	0	0	0	0	0	0	0	0	0	0	0	0	0	0	0
4930407I10Rik	0	0	0	0	0	0	0	0	0	0	0	0	0	0	0	0	0	0	0	0
4930408F14Rik	0	0	0	0	0	0	0	0	0	0	0	0	0	0	0	0	0	0	0	0
4930412B13Rik	0	0	0	0	0	0	0	0	0	0	0	0	0	0	0	0	0	0	0	0
4930412C18Rik	0	0	0	0	0	0	0	0	1.0101	0	0	0	0	0	0	0	0	0	0	0
4930412F15Rik	0	0	0	0	0	0	0	0	0	0	0	0	0	0	0	0	0	0	0	0
4930412O13Rik	0	1.19048	0	0	0	0	0	0	0	0	0	0	0	0	0	0	0	0	0	0
4930413E15Rik	0	0	0	0	0	0	0	0	0	0	0	0	0	0	0	0	0	0	0	0
4930413F20Rik	0	0	0	0	0	0	0	0	0	0	0	0	0	0	0	0	0	0	0	0
4930413G21Rik	5.10204	1.78571	0.295858	3.52941	0.806452	0.175747	2.00893	0	1.0101	3.55556	3.30579	0	3.57143	1.53846	3.65297	3.5503	0.680272	0.909091	0	0
4930413M19Rik	0	0	0	0	0	0	0	0	0	0	0	0	0	0	0	0	0	0	0	0
4930414L22Rik	3.06122	5.35714	2.36686	7.45098	0	0.351494	2.90179	1.34228	8.08081	8.44444	2.47934	1.63934	10.7143	1.53846	2.28311	4.73373	4.08163	5.45455	1.72414	0
4930414N06Rik	0	0	0	0	0	0	0	0	0	0	0	0	0	0	0	0	0	0	0	0
4930415F15Rik	0	0	0.295858	0.392157	0	0	0	0	0	1.77778	0.826446	0	0.714286	0	0	0	0	0	0	0
4930415L06Rik	0	0	0	0	0	0	0	0	0	0	0	0	0	0	0	0	0	0	0	0
4930415O20Rik	0	0	0	0	0	0	0	0	0	0.444444	0	0	0	0	0	0	0.680272	0	0	0
4930417G10Rik	0	0	0	0	0	0	0	0	0	0	0	0	0.714286	0	0	0	0	0	0	0
4930417O13Rik	0	1.19048	0	0	0	0.175747	0	0	0	0	0	0	0	1.53846	0	0	0	0	0	0
4930417O22Rik	0	0	0	0	0	0	0	0	0	0	0	0	0	0	0	0	0	0	0	0
4930419G24Rik	0	0	0	0	0	0	0	0	0	0	0	0	0	0	0	0	0	0	0	0
4930420K17Rik	38.7755	35.7143	2.66272	45.098	24.1935	9.84183	31.4732	4.69799	49.4949	13.7778	58.6777	4.91803	15	27.6923	13.242	66.8639	2.04082	60	1.72414	29.0323
4930422G04Rik	6.12245	2.38095	7.69231	11.7647	0	0	0.446429	0	6.06061	15.1111	15.7025	4.91803	12.8571	1.53846	1.36986	17.1598	21.0884	2.72727	0.862069	6.45161
4930423M02Rik	0	0	0	0	0	0	0	0	0	0	0	0	0	0	0	0	0	0	0	0
4930425K10Rik	0	0	0	0	0	0	0	0	0	0	0	0	0	0	0	0	0	0	0	0
4930425O10Rik	0	0	0	0	0	0	0	0	0	0	0	0	0	0	0	0	0	0	0	0
4930426L09Rik	1.02041	0	0	0.784314	0	0.351494	0.669643	0	0	0.888889	0	1.63934	2.14286	0	0.913242	0.591716	1.36054	0	0	0
4930427A07Rik	16.3265	1.19048	10.9467	14.1176	0.806452	1.05448	0.892857	0	23.2323	18.6667	21.4876	16.3934	11.4286	0	0.456621	30.1775	15.6463	1.81818	0	3.22581
4930428D18Rik	0	0	0	0	0	0	0	0	0	0	0	0	0	0	0	0	0	0	0	0
4930428E07Rik	0	0	0	0	0	0	0	0	0	0	0	0	0	0	0	0	0	0	0	0
4930428E23Rik	0	0	0	0	0	0	0	0	0	0	0	0	0	0	0	0	0	0	0	0
4930428G15Rik	0	0	0	0	0	0	0	0	0	0	0	0	0	0	0	0	0	0	0	0
4930428O21Rik	0	0	0.591716	0	0	0	0	0	0	0	0	0	0	0	0	0	0	0	0	3.22581
4930429B21Rik	0	0	0	0	0	0	0	0	0	0	0	0	0	0	0.913242	0	0	0.909091	0	3.22581
4930429D17Rik	0	0	0	0	0	0	0	0	0	0	0	0	0	0	0	0	0	0	0	0
4930429F11Rik	0	0	0	0	0	0	0	0	0	0	0	0	0	0	0	0	0	0	0	0
4930429F24Rik	0	0.595238	0.591716	0	0	0	0.223214	0	0	0.444444	0	1.63934	0	0	0	0	0	0	0	0
4930430A15Rik	0	0	0	0	0	0	0	0	0	0	0	0	0	0	0	0	0	0	0	0
4930430D24Rik	0	0	0	0	0	0	0	0	0	0	0	0	0	0	0	0	0	0	0	0
4930430F08Rik	3.06122	2.97619	0.591716	4.31373	0	0.175747	1.78571	0.671141	4.0404	12.8889	3.30579	1.63934	11.4286	0	2.28311	5.32544	43.5374	1.81818	12.069	0
4930430F21Rik	0	0	0	0	0	0	0	0	0	0	0	0	0	0	0	0	0	0	0	0
4930430J02Rik	0	0	0	0	0	0	0	0	0	0	0	0	0	0	0	0	0	0	0	0
4930431A04Rik	0	0.595238	0	0	0	0	0	0	0	0	0	0	0	0	0	0	0	0	0	0
4930431P03Rik	0	2.97619	1.77515	0.392157	0	3.51494	0	0	0	0.444444	0	0	0	0	0.456621	0	0	0.909091	0	0
4930432J09Rik	0	0	0	0	0	0	0	0	0	0	0	0	0	0	0	0	0	0	0	0
4930432K09Rik	0	0	0	0	0	0	0	0	0	0	0	0	0	0	0	0	0	0	0	0
4930432K21Rik	0	0	1.47929	1.17647	0	0	0	0	0	1.77778	0.826446	0	0	0	0.913242	1.77515	0	0	0	0
4930432M17Rik	0	0	0	0	0	0	0	0	0	0	0	0	0	0	0	0	0	0	0	0
4930433B08Rik	0	0	0	0	0	0	0	0	0	0	0	0	0	0	0	0	0	0	0	0
4930433I11Rik	0	0	0	0	0	0	0	0	0	0	0	0	0	0	0	0	0	0	0	0
4930433N12Rik	0	0	0	0	0	0	0	0	0	0	0	0	0	0	0	0	0	0	0	0
4930434J06Rik	0	0	0	0	0	0	0	0	0	0	0	0	0	0	0	0	0	0	0	0
4930435E12Rik	0	0	0	0	0	0	0	0	0	0	0	0	0	0	0	0	0	0	0	0
4930438E09Rik	0	0	0	0	0	0	0	0	0	0	0	0	0	0	0	0	0	0	0	0
4930440C22Rik	0	0	0	0	0	0	0	0	0	0	0	0	0	0	0	0	0	0	0	0
4930441J16Rik	0	0	0	0	0	0	0	0	0	0	0	0	0	0	0	0	0	0	0	0
4930441O14Rik	0	0	0	0.392157	0	0	0.446429	0	0	0.888889	3.30579	0	0	0	0.456621	0.591716	0	0	0	0
4930442J19Rik	0	0	0	0	0	0	0	0	0	0	0	0	0	0	0	0	0	0	0	0
4930442L01Rik	0	0	0	0	0	0	0	0	0	0	0	0	0	0	0	0	0	0	0	0
4930443G12Rik	0	0	0	0	0	0	0	0	0	0	0	0	0	0	0	0	0	0	0	0
4930443O20Rik	0	0	0	0	0	0	0	0	0	0	0	0	0	0	0	0	0	0	0	0
4930444A02Rik	1.02041	2.38095	1.77515	4.31373	0	0.351494	3.125	0.671141	5.05051	9.77778	0.826446	3.27869	6.42857	1.53846	3.19635	1.18343	1.36054	0.909091	0.862069	3.22581
4930444F02Rik	1.02041	0	0	0.392157	0	0	0	0	0	3.11111	0	0	0.714286	0	0	0	0	0	0	0
4930444G20Rik	0	0	0	0	0	0	0	0	0	0	0	0	0	0	0	0	0	0	0	0
4930444M15Rik	0	0	0	0	0	0	0	0	0	0	0	0	0	0	0	0	0.680272	0	0	0
4930444P10Rik	0	0	0	0	0	0	0	0	0	0	0	0	0	0	0	0	0	0	0	0
4930447A16Rik	0	0	0	0	0	0	0	0	0	0	0	0	0	0	0	0	0	0	0	0
4930447C04Rik	0	0	0	0.392157	0	0	0	0	0	1.33333	0	0	2.14286	0	0	0	0	0	0	0
4930447J18Rik	0	0	0	0	0	0	0	0	0	0	0	0	0	0	0.456621	0	0	0	0	0
4930447K03Rik	0	0	0	0.392157	0	0	0.892857	0	0	0	0	0	0	0	1.36986	0	0	0	0	0
4930447N08Rik	0	0	0	0	0	0	0	0	0	0	0	0	0	0	0	0	0	0	0	0
4930448C13Rik	0	0	0	0	0	0	0	0	0	0	0	0	0	0	0	0	0	0	0	0
4930448F12Rik	0	0	0	0	0	0	0	0	0	0	0	0	0	0	0	0	0	0	0	0
4930448H16Rik	0	0	0	0	0	0	0	0	0	0	0	0	0	0	0	0	0	0	0	0
4930448I06Rik	0	0	0	0	0	0	0	0	0	0	0	0	0	0	0	0	0	0	0	0
4930448I18Rik	0	0	0	0	0	0	0	0	0	0	0	0	0	0	0	0	0	0	0	0
4930448K20Rik	0	0	0	0	0	0	0	0	0	0	0	0	0	0	0	0	0	0	0	0
4930449E01Rik	0	0	0	0	0	0	0	0	0	0	0	0	0	0	0	0	0	0	0	0
4930449E18Rik	0	0	0	0	0	0	0	0	0	0	0	0	0	0	0	0	0	0	0	0
4930449I24Rik	0	0	0	0	0	0	0	0	0	0	0	0	0	0	0	0	0	0	0	0
4930451C15Rik	0	0	0	0.392157	0	0	0	0	0	0.444444	0	1.63934	0	0	0	0	0	0	0	0
4930451I11Rik	0	0	0	0	0	0	0	0	0	0	0	0	0	0	0	0	0	0	0	0
4930452A19Rik	0	0	0	0	0	0	0	0	0	0	0	0	0	0	0	0	0	0	0	0
4930452B06Rik	1.02041	0	0	0	0	0	0	0	0	0	0	0	0	0	0	0	0.680272	0	0	0
4930452G13Rik	0	0	0	0	0	0	0	0	0	0	0	0	0	0	0	0	0	0	0	0
4930452N14Rik	0	0	0	0	0	0	0	0	0	0	0	0	0	0	0	0	0	0	0	0
4930453H23Rik	0	0	0	0	0	0	0	0	0	0	0	0	0	0	0	0	0	0	0	0
4930453N24Rik	20.4082	24.4048	18.9349	29.8039	3.22581	6.67838	16.9643	4.02685	32.3232	43.5556	34.7107	24.5902	32.8571	16.9231	11.8721	37.2781	35.3741	9.09091	1.72414	16.129
4930455B14Rik	0	0	0	0	0	0	0	0	0	0	0	0	0	0	0	0	0	0	0	0
4930455C13Rik	0	0	0	0	0	0	0.223214	0	0	0	0	0	0	0	0	0	0	0	0	0
4930455C21Rik	13.2653	2.97619	13.9053	18.8235	1.6129	1.23023	6.91964	2.01342	21.2121	29.3333	8.26446	6.55738	12.8571	7.69231	6.84932	13.6095	21.7687	5.45455	0.862069	9.67742
4930455D15Rik	0	0	0	0	0	0	0	0	0	0	0	0	0	0	0	0	0	0	0	0
4930455F16Rik	0	0	0	0	0	0	0	0	0	0	0	0	0	0	0	0	0	0	0	0
4930455F23Rik	9.18367	4.16667	6.80473	10.5882	0.806452	1.23023	2.45536	0	6.06061	28.8889	9.91736	11.4754	27.8571	13.8462	8.21918	17.7515	9.52381	0.909091	0	6.45161
4930455H04Rik	0	0	0	0	0	0	0	0	0	0	0	0	0	0	0	0	0	0	0	0
4930455J16Rik	0	0	0	0	0	0	0	0	0	0	0	0	0	0	0	0	0	0	0	0
4930456L15Rik	0	0	0	0	0	0	0	0	0	0	0	0	0	0	0	0	0	0	0	0
4930458L03Rik	0	0	0	0	0	0	0	0	0	0	0	0	0	0	0	0	0	0	0	0
4930459L07Rik	0	0	0	0	0	0	0	0	0	0	0	0	0	0	0	0	0	0	0	0
4930461G14Rik	0	0	0	0	0	0	0	0	0	0	0	0	0	0	0	0	0	0	0	0
4930465A12Rik	0	0	0	0	0	0	0	0	0	0	0	0	0	0	0	0	0	0	0	0
4930465K10Rik	0	0.595238	0.295858	0.784314	0	0.175747	0	0	1.0101	0	0	0	0	0	0	0	1.36054	0	0	0
4930465M20Rik	0	0	0	0	0	0	0	0	0	0	0	0	0	0	0	0	0	0	0	0
4930467D21Rik	0	0	0	0	0	0	0	0	0	0	0	0	0	0	0	0	0	0	0	0
4930467E23Rik	0	0	0	0	0	0	0	0	0	0	0	0	0	0	0	0	0	0	0	0
4930467K11Rik	0	0	0	0.392157	0	0	0	0	0	0	0	0	1.42857	0	0	0	0	0	0	0
4930468A15Rik	0	0	0	0	0	0	0	0	0	0	0	0	0	0	0	0	0	0	0	0
4930469G21Rik	0	0	0	0	0	0	0	0	0	0	0	0	0	0	0	0	0	0	0	0
4930470H14Rik	0	0	0	0	0	0	0	0	0	0	0	0	0	0	0	0	0	0	0	0
4930470P17Rik	0	0	0	0	0	0	0	0	0	0	0	0	0	0	0	0	0	0	0	0
4930471C04Rik	0	0	0	0	0	0	0	0	0	0	0	0	0	0	0	0	0	0	0	0
4930471G03Rik	0	0	0	0	0	0	0	0	0	0.444444	0	0	0	0	0	0	0	0	0	0
4930471I20Rik	0	0	0	0	0	0	0	0	0	0	0	0	0	0	0	0	0	0	0	0
4930471M09Rik	0	0	0.295858	0.784314	0	0	0	0	0	0	0	0	0.714286	0	0	0	0	0	0	0
4930471M23Rik	11.2245	0	2.07101	21.5686	0.806452	1.75747	12.5	0.671141	32.3232	12.4444	4.95868	6.55738	2.85714	1.53846	4.10959	4.14201	10.8844	0.909091	1.72414	6.45161
4930473A02Rik	0	0	0	0	0	0	0	0	0	0	0	0	0.714286	0	0	0	0	0	0	0
4930473A06Rik	2.04082	1.19048	1.18343	2.7451	0.806452	0.175747	2.23214	0	1.0101	5.77778	4.95868	6.55738	8.57143	0	1.36986	4.73373	5.44218	0	0.862069	0
4930473O22Rik	0	0	0	0	0	0	0	0	0	0	0	0	0	0	0	0	0	0	0	0
4930474G06Rik	0	0	0	0	0	0	0	0	0	0	0	0	0	0	0	0	0	0	0	0
4930474H20Rik	0	0	0	0	0	0	0	0	0	0	0	0	0	0	0	0	0	0	0	0
4930474M22Rik	0	0	0	0	0	0	0	0	0	0	0	0	0	0	0	0	0	0	0	0
4930474N05Rik	0	0	0	0	0	0	0	0	0	0	0	0	0	0	0	0	0	0	0	0
4930474N09Rik	0	0	0	0	0	0	0	0	0	0	0	0	0	0	0	0	0	0	0	0
4930478L05Rik	0	0.595238	0	0	0	0	0	0	0	0	0	1.63934	0	0	0	0	0	0	0	0
4930478P22Rik	0	0	0	0	0	0	0	0	0	0	1.65289	0	0	0	0	0	0	0	0	0
4930479D17Rik	0	0	0	0	0	0	0	0	0	0.444444	0	0	0	0	0	0	0	0	0	0
4930479M11Rik	0	0	0	0	0	0	0	0	0	0	0	0	0	0	0	0	0	0	0	0
4930480E11Rik	0	0	0	0	0	0	0	0	0	0	0	0	0	0	0	0	0	0	0	0
4930480G23Rik	0	0	0	0	0	0	0	0	0	0	0	0	0	0	0	0	0	0	0	0
4930480K15Rik	0	0	0	0	0	0	0	0	0	0	0	0	0	0	0	0	0	0	0	0
4930480M12Rik	0	0	0	0	0	0	0	0	0	0	0	0	0	0	0	0	0	0	0	0
4930481A15Rik	5.10204	6.54762	2.07101	6.27451	2.41935	4.21793	4.46429	0	7.07071	10.6667	8.26446	4.91803	9.28571	6.15385	4.10959	10.0592	8.84354	3.63636	3.44828	19.3548
4930483J18Rik	0	0.595238	0	0	0	0	0	0	0	0	0	0	0	1.53846	0	1.77515	0	0	0	0
4930483K19Rik	0	0	0	0	0	0	0	0	0	0	0	0	0	0	0	0	0	0	0	0
4930483O08Rik	0	0	0	0	0	0	0	0	0	0	0	0	0	0	0	0	0	0	0	0
4930486F22Rik	0	0	0	0	0	0	0	0	0	0	0	0	0	0	0	0	0	0	0	0
4930486I03Rik	0	0	0	0	0	0	0	0	0	0	0	0	0	0	0	0	0	0	0	0
4930486L24Rik	0	13.6905	0.295858	0	0	0	0	0	0	4.88889	0	0	6.42857	0	0	2.36686	0	0	0	0
4930487D11Rik	0	0	0	0	0	0	0	0	0	0	0	0	0	0	0	0	0	0	0	0
4930487H11Rik	0	0	0	0.784314	0	0	0	0	0	0	0	0	0	0	0	0	0	0	0	0
4930488B22Rik	0	0	0	0	0	0	0	0	0	0	0	0	0	0	0	0	0	0	0	0
4930488L21Rik	0	0	0	0	0	0	0	0	0	0	0	0	0	0	0	0	0	0	0	0
4930500F04Rik	0	0	0	0	0	0	0	0	0	0	0	0	0	0	0	0	0	0	0	0
4930500J02Rik	0	0	0	0	0	0	0	0	0	0	0	0	0	0	0	0	0	0	0	0
4930500L23Rik	0	0	0	0	0	0	0	0	0	0	0	0	0	0	0	0	0	0	0	0
4930502A04Rik	0	0	0	0	0	0	0	0	0	0	0	0	0	0	0	0	0	0	0	0
4930502E09Rik	0	0	0.295858	0	0	0	0	1.34228	1.0101	0	0	0	0	0	0	0	0	0	0.862069	0
4930502E18Rik	0	0	0	0	0	0	0	0	0	0	0	0	0	0	0	0	0	0	0	0
4930503B20Rik	0	0	0	0	0	0	0	0	0	0	0	0	0	0	0	0	0	0	0	0
4930503E14Rik	0	0	0	0	0	0	0	0	0	0	0	0	0	0	0	0	0	0	0	0
4930503E24Rik	1.02041	0.595238	1.47929	6.27451	0	0.175747	1.5625	0	3.0303	12	2.47934	3.27869	4.28571	0	0.456621	4.73373	2.72109	0	0	0
4930503H13Rik	0	0	0	0	0	0	0	0	0	0	0	0	0	0	0	0	0	0	0	0
4930503L19Rik	7.14286	1.78571	2.36686	7.45098	0	0	1.78571	0	13.1313	8	7.43802	3.27869	13.5714	3.07692	4.10959	10.0592	13.6054	1.81818	0	3.22581
4930503O07Rik	0	0	0	0	0	0	0	0	0	0	0	0	0	0	0	0	0	0	0	0
4930504O13Rik	0	0	0	0	0	0	0	0	0	0	0	0	0	0	0	0	0	0	0	0
4930505A04Rik	0	0	0	0	0	0	0	0	0	0	0	0	0	0	0	0	0	0	0	0
4930505G20Rik	0	0	0	0	0	0	0	0	0	0	0	0	0	0	0	0	0	0	0	0
4930506M07Rik	24.4898	0.595238	0.591716	7.84314	0	0.175747	7.58929	1.34228	7.07071	0.888889	0	0	2.14286	0	2.28311	0	0	0	0	0
4930507D05Rik	1.02041	0	0	2.7451	0.806452	0	0	0	1.0101	3.55556	1.65289	1.63934	2.14286	1.53846	0	4.14201	0	2.72727	0	3.22581
4930509E16Rik	0	0.595238	0.295858	0.392157	0.806452	0.175747	0	0	0	4	3.30579	1.63934	2.85714	0	0	4.73373	1.36054	0.909091	0	0
4930509J09Rik	0	0	0	0	0	0	0	0	0	0	0	0	0	0	0	0	0	0	0	0
4930509K18Rik	0	0	0	0	0	0	0	0	0	0	0	0	0	0	0	0	0	0	0	0
4930511A02Rik	0	0	0	0	0	0	0	0	0	0	0	0	0	0	0	0	0	0	0	0
4930511E03Rik	0	0	0	0.392157	0	0	0.223214	0	0	0	0	0	0	0	0	0	0	0	0	0
4930511I11Rik	0	0	0.295858	0	0	0.351494	0	0	0	0	0	0	0	0	0	0	0	0	0	0
4930511M06Rik	0	0	0	0	0	0	0	0	0	0	0	0	0	0	0	0	0	0	0	0
4930511M11Rik	0	0	0	0	0	0	0	0	0	0	0	0	0	0	0.456621	0	0	0	0	0
4930512B01Rik	0	0	0	0	0	0	0	0	0	0	0	0	0	0	0	0	0	0	0	0
4930513D17Rik	0	0	0	0	0	0	0	0	0	0	0	1.63934	0	0	0.913242	0	0	0	0	0
4930513N10Rik	3.06122	1.78571	2.36686	3.52941	0	0.702988	0.669643	0	2.0202	5.33333	2.47934	0	5	0	0.913242	1.77515	4.08163	0.909091	0	0
4930513O06Rik	0	0	0	0	0	0	0	0	0	0	0	0	0	0	0	0	0	0	0	0
4930515B02Rik	0	0	0	0	0	0	0	0	0	0	0	0	0	0	0	0	0	0	0	0
4930515G01Rik	1.02041	1.19048	1.18343	3.13725	1.6129	1.05448	0.892857	0.671141	2.0202	6.66667	4.13223	3.27869	4.28571	0	1.36986	4.14201	3.40136	0	0	0
4930515G16Rik	0	0	0	0	0	0	0	0	0	0	0	0	0	0	0	0	0	0	0	0
4930515L03Rik	0	0	0	0	0	0	0	0	0	0	0	0	0	0	0	0	0	0	0	0
4930515L19Rik	0	0	0	0	0	0	0	0	0	0	0	0	0	0	0	0	0	0	0	0
4930517E11Rik	0	0	0	0	0	0	0	0	0	0	0	0	0	0	0	0	0	0	0	0
4930518P08Rik	0	0	0	0	0	0	0	0	0	0	0	0	0	0	0	0	0	0	0	0
4930519D14Rik	0	0	0	0	0	0	0	0	0	0	0	0	0	0	0	0	0	0	0	0
4930519F09Rik	0	0	0	1.17647	0	0.175747	0.223214	0	0	0	0	0	0.714286	0	0	0.591716	0	0	0	0
4930519F16Rik	0	0	0	0	0	0	0	0	0	0	0	0	0	0	0	0	0	0	0	0
4930519F24Rik	0	0	0	0	0	0	0	0	0	0	0	0	0	0	0	0	0	0	0	0
4930519G04Rik	0	0	2.07101	0.784314	4.03226	1.58172	0.223214	0	0	3.55556	0	0	0	0	0.456621	0	0.680272	0	0	0
4930519H02Rik	0	0	0	0	0	0	0	0	0	0	0	0	0	0	0	0	0	0	0	0
4930520O04Rik	1.02041	0	0.295858	3.52941	0.806452	0	0.223214	0	0	11.1111	3.30579	3.27869	5.71429	3.07692	0	5.32544	2.72109	0	0	0
4930520P13Rik	0	0	0	0	0	0	0	0	0	0	0	0	0	0	0	0	0	0	0	0
4930521A18Rik	0	0	0	0	0	0	0	0	0	0	0	0	0	0	0	0	0	0	0	0
4930521E06Rik	0	0	0	0	0	0	0	0	0	0	0	0	0	0	0	0	0	0	0	0
4930522H14Rik	0	0	0	0	0	0	0	0	0	0	0	0	0	0	0	0	0	0	0	0
4930522O17Rik	0	0	0	0	0	0	0	0	0	0	0	1.63934	0	0	0	0	0	0	0	0
4930523C07Rik	38.7755	45.8333	60.6509	48.6275	28.2258	23.3743	25.8929	6.71141	70.7071	66.2222	91.7355	24.5902	24.2857	13.8462	14.1553	73.3728	29.2517	55.4545	6.89655	29.0323
4930523O13Rik	0	0	0	0	0	0	0	0	0	0	0	0	0	0	0	0	0	0	0	0
4930524B15Rik	0	0	0	0	0	0	0	0	0	0	0	0	0	0	0	0	0	0	0	0
4930524C18Rik	0	0	0	0	0	0	0	0	0	0	0	0	0	0	0	0	0	0	0	0
4930524E20Rik	0	0	0	0	0	0	0	0	0	0	0	0	0	0	0	0	0	0	0	0
4930524L23Rik	0	0	0	0.784314	0	0	0	0	0	1.77778	0	0	0.714286	0	0	0	0	0	0	0
4930524N10Rik	0	0	0	0	0	0	0	0	0	0	0	0	0	0	0	0	0	0	0	0
4930524O05Rik	0	0	0	0	0	0	0	0	0	0	0	0	0	0	0	0	0	0	0	0
4930524O08Rik	0	0	0	0	0	0	0	0	0	0	0	0	0	0	0	0	0	0	0	0
4930525D18Rik	1.02041	0	0	0	0	0	0	0	0	0.444444	0	0	0	0	0	0	0	0	0	0
4930525F21Rik	0	0	0	0	0	0	0	0	0	0	0	0	0	0	0	0	0	0	0	0
4930525G20Rik	0	0	0	0	0	0	0.223214	0	0	0	0	0	0	0	0	0.591716	0	0	0	3.22581
4930525M21Rik	0	0	0	0	0	0	0	0	0	0	0	0	0	0	0	0	0	0	0	0
4930526D03Rik	0	0	0	0	0	0	0	0	0	0	0	0	0	0	0	0	0	0	0	0
4930526I15Rik	25.5102	13.6905	18.0473	29.0196	4.83871	8.96309	17.8571	4.02685	30.303	32	16.5289	27.8689	32.8571	4.61538	11.4155	22.4852	10.2041	14.5455	1.72414	3.22581
4930526L06Rik	0	0	0	0	0	0	0	0	0	0	0	0	0	0	0	0	0	0	0	0
4930527F14Rik	0	0	0	0	0	0	0	0	0	0	0	0	0	0	0	0	0	0	0	0
4930527G23Rik	0	0	0	0	0	0	0	0	0	0	0	0	0	0	0	0	0	0	0	0
4930528A17Rik	0	0	0	1.96078	0	0	0.446429	0	0	0.444444	0.826446	0	1.42857	3.07692	0	0.591716	0.680272	0.909091	0	3.22581
4930528D03Rik	0	0	0.295858	0	0	0	0	0	0	0	0	0	0	0	0	0	0	0	0	0
4930528F23Rik	0	0	0	0	0	0	0	0	0	0.444444	0	0	0	0	0	0	2.72109	0	0	0
4930528P14Rik	0	0	0	0	0	0	0	0	0	0	0	0	0	0	0	0	0	0	0	0
4930529C04Rik	0	0	0	0	0	0	0	0	0	0	0	0	0	0	0	0	0	0	0	0
4930529F22Rik	0	0	0	0	0	0	0	0	0	0	0	0	0	0	0	0	0	0	0	0
4930529F24Rik	0	0	0	0	0	0	0	0	0	0	0	0	0	0	0	0	0	0	0	0
4930529K09Rik	0	0	0	0	0	0	0	0	0	0	0	0	0	0	0	0	0	0	0	0
4930529L06Rik	0	0	0	0	0	0	0	0	0	0	0	0	0	0	0	0	0	0	0	0
4930529M08Rik	0	0	0	0	0	0	0	0	0	0	0	0	0	0	0	0	0	0	0	0
4930533B01Rik	0	0	0	0	0	0	0	0	0	0	0	0	0	0	0	0	0	0	0	0
4930533P14Rik	0	0	0	0	0	0	0	0	0	0	0	0	0	0	0	0	0	0	0	0
4930534B04Rik	21.4286	2.97619	28.1065	28.2353	0.806452	3.51494	5.35714	3.3557	29.2929	56.8889	30.5785	18.0328	29.2857	4.61538	6.39269	24.2604	32.6531	2.72727	6.03448	6.45161
4930538K18Rik	0	0	0	0	0	0	0	0	0	0	0	0	0	0	0	0	0	0	0	0
4930539C22Rik	0	0	0	0	0	0	0	0	0	0	0	0	0	0	0	0	0	0	0	0
4930539E08Rik	0	0	0	0	0	0	0.223214	0	0	0.888889	2.47934	0	1.42857	1.53846	0.456621	1.18343	0	0	0	0
4930539J05Rik	3.06122	1.19048	1.77515	3.92157	0	0.527241	1.78571	0.671141	2.0202	4.88889	0.826446	1.63934	2.85714	3.07692	0.456621	1.77515	1.36054	1.81818	0	0
4930539M17Rik	0	0	0	0	0	0	0	0	0	0	0	0	0	0	0	0	0	0	0	0
4930539N22Rik	0	0	0	0	0	0	0	0	0	0	0	0	0	0	0	0	0	0	0	0
4930540M03Rik	0	0	0	0	0	0	0	0	0	0	0	0	0	0	0	0	0	0	0	0
4930542C21Rik	0	0	0	0	0	0	0	0	0	0	0	0	0	0	0	0	0	0	0	0
4930542D17Rik	0	0	0	0	0	0	0	0	0	0	0	0	0	0	0	0	0	0	0	0
4930542H20Rik	0	0	0	0	0	0	0	0	0	0	0	0	0	0	0	0	0	0	0	0
4930543E12Rik	0	0	0	0	0	0	0	0	0	0	0	0	0	0	0	0	0	0	0	0
4930544D05Rik	1.02041	0	0	0	0	0	0	0	0	0.444444	0	0	0	0	0	0	0	0	0	0
4930544G11Rik	0	0	0	0	0	0	0	0	0	0	0	0	0	0	0	0	0	0	0	0
4930544M13Rik	0	0	0	0	0	0	0	0	0	0	0	0	0	0	0	0	0	0	0	0
4930544O15Rik	1.02041	0	0	0	0	0	0	0	0	0	0	0	0	0	0	0	0.680272	0	0	0
4930545E07Rik	0	0	0	0	0	0	0	0	0	0	0	0	0	0	0	0	0	0	0	0
4930545H06Rik	0	0	0	0	0	0	0	0	0	0	0	0	0	0	0	0	0	0	0	0
4930545L23Rik	0	0	0	0	0	0	0	0	0	0	0	0	0	0	0	0	0	0	0	0
4930546C10Rik	0	0	0	0	0	0	0	0	0	0	0	0	0	0	0.456621	0	0	0	0	0
4930546K05Rik	0	0	0	0	0	0	0	0	0	0	0	0	0	0	0	0	0	0	0	0
4930547C10Rik	0	0	0	0	0	0	0	0	0	0	0	0	0	0	0	0	0	0	0	0
4930547E08Rik	0	0	0	0	0	0	0	0	0	0	0	0	0	0	0	0	0	0	0	0
4930547E14Rik	0	0	0	0	0	0	0	0	0	0	0	0	0	0	0	0	0	0	0	0
4930547N16Rik	16.3265	0.595238	14.2012	11.7647	0	0.527241	0.223214	0	21.2121	12	19.8347	4.91803	7.14286	0	0.456621	14.7929	27.8912	0	2.58621	0
4930548G14Rik	0	0	0	0	0	0	0	0	0	0	0	0	0	0	0	0	0	0	0	0
4930548H24Rik	0	0	0	0.392157	0	0	0	0	0	0	0	0	0	0	0	0	0	0	0	0
4930548J01Rik	0	0	0	0	0	0	0	0	0	0	0	0	0	0	0	0	0	0	0	0
4930548K13Rik	0	0	0	0	0	0	0	0	0	0	0	0	0	0	0	0	0	0	0	0
4930549C01Rik	0	0	0	0	0	0	0	0	0	0	0	0	0	0	0	0	0	0	0	0
4930549G23Rik	2.04082	1.19048	1.18343	3.52941	0.806452	0.351494	1.33929	0	7.07071	4.44444	3.30579	4.91803	4.28571	3.07692	3.19635	5.32544	4.08163	1.81818	0	3.22581
4930550C14Rik	0	0.595238	0	0	0	0	0	3.3557	0	0	0	0	2.14286	0	0	0.591716	2.04082	0	8.62069	0
4930550L24Rik	0	0	0	0	0	0.175747	0	0	0	0	0	0	0	0	0	0	0	0	0	0
4930552N02Rik	0	0	0	0	0	0	0	0	0	0	0	0	0	0	0	0	0	0	0	0
4930552P12Rik	0	0	0	0	0	0	0	0	0	0	0	0	0	0	0	0	0	0	0	0
4930553E22Rik	0	0	0	0	0	0	0	0	0	0	0	0	0	0	0	0	0	0	0	0
4930554C24Rik	0	0	0	0	0	0	0	0	0	0	0	0	0	0	0	0	0	0	0	0
4930555B11Rik	0	0	0	0	0	0	0	0	0	0	0	0	0	0	0	0	0	0	0	0
4930555G01Rik	0	0	0	0	0	0	0	0	0	0	0	0	0	0	0	0	0	0	0	0
4930555I21Rik	0	0	0	0	0	0	0	0	0	0	0	1.63934	0.714286	0	0.456621	0	0	0	0	0
4930556C24Rik	0	0	0	0	0	0	0	0	0	0	0	0	0	0	0	0	0	0	0	0
4930556G01Rik	0	0	0	0	0	0	0	0	0	0	0	0	0	0	0	0	0	0	0	0
4930556J02Rik	0	0	0	0	0	0	0	0	0	0	0	0	0	0	0	0	0	0	0	0
4930556M19Rik	0	0	0	0	0	0	0	0	0	0.444444	0	1.63934	2.85714	1.53846	0	0	0	0	0	0
4930556N09Rik	0	0	0	0	0	0	0	0	0	0	0	0	0	0	0	0	0	0	0	0
4930557A04Rik	0	0	0	0	0	0	0	0	0	0	0	0	0	0	0	0	0	0	0	0
4930557J02Rik	1.02041	1.78571	0.295858	0.392157	0	0.175747	0.223214	0	1.0101	0.444444	2.47934	0	0	0	0	0	0.680272	0	0	0
4930558C23Rik	0	0	0	0	0	0	0	0	0	0	0	0	0	0	0	0	0	0	0	0
4930558G05Rik	0	0	0	0	0	0	0	0	0	0	0	0	0	0	0	0	0	0	0	0
4930558J18Rik	1.02041	0.595238	2.66272	2.35294	0	0	0	0	2.0202	4.44444	4.95868	0	2.85714	0	0.456621	2.36686	4.08163	0	0.862069	0
4930558K02Rik	1.02041	0	0	1.17647	0	0.351494	0	0	0	0.888889	0	0	0	0	0	0.591716	0	0	0	0
4930562C15Rik	0	0	0	0	0	0	0	0	0	0	0	0	0	0	0	0	0	0	0	0
4930562F07Rik	0	0	0	1.56863	0	0	0	0	0	5.77778	0	0	0	0	0.456621	0	0	0	0	0
4930563D23Rik	0	0	0	0	0	0	0	0	0	0	0	0	0	0	0	0	0	0	0	0
4930563E18Rik	0	0	0	0	0	0	0	0	0	0	0	0	0	0	0	0	0	0	0	0
4930563E22Rik	3.06122	1.19048	0	0.784314	2.41935	1.05448	1.33929	0.671141	3.0303	1.33333	0.826446	3.27869	1.42857	1.53846	0	1.18343	0	0	0	0
4930563F08Rik	0	0	0	0	0	0	0	0	0	0	0	0	0	0	0	0	0	0	0	0
4930563M20Rik	0	0	0	0	0	0	0	0	0	0	0	0	0	0	0	0	0	0	0	0
4930564B18Rik	0	0	0	0	0	0	0	0	0	0	0	0	0	0	0	0	0	0	0	0
4930564D02Rik	0	0	0	0	0	0	0	0	0	0	0	0	0	0	0	0	0	0	0	0
4930564G21Rik	0	0	0	0	0	0	0	0	0	0	0	0	0	0	0	0	0	0	0	0
4930564K09Rik	0	0	0	0	0	0	0	0	0	0	0	0	0	0	0	0	0	0	0	0
4930565A17	0	0	0	0	0	0	0	0	0	0	0	0	0	0	0	0	0	0	0	0
4930565D16Rik	0	0	0	0	0	0	0	0	0	0	0	0	0	0	0	0	0	0	0	0
4930565N06Rik	0	0	0	0	0	0	0.223214	0	1.0101	0	0	1.63934	0.714286	0	0	0	0	0	0	0
4930567H12Rik	0	0	0	0	0	0	0	0	0	0	0	0	0	0	0	0	0	0	0	0
4930567H17Rik	0	0	0	0	0	0	0	0	0	0	0	0	0	0	0	0	0	0	0	0
4930567J20Rik	0	0	0	0	0	0	0	0	0	0	0	0	0	0	0	0	0	0	0	0
4930567K20Rik	0	0	0	0	0	0	0	0	0	0	0	0	0	0	0	0	0	0	0	0
4930568D16Rik	0	0	0	0	0	0	0	0	0	0	0	0	0	0	0	0	0	0	0	0
4930568E12Rik	0	0	0	0	0	0	0	0	0	0	0	0	0	0	0	0	0	0	0	0
4930568G15Rik	0	0	0	0	0	0	0	0	0	0	0	0	0	0	0	0	0	0	0	0
4930568K20Rik	0	0	0	0	0	0	0	0	0	0	0	0	0	0	0	0	0	0	0	0
4930570G19Rik	0	0	0	0.392157	0	0	0.223214	0	0	0	0	0	0	0	0	0	0	0	0	0
4930571K23Rik	0	0	0	0	0	0	0	0	0	0	0	0	0	0	0	0	0	0	0	0
4930572J05Rik	29.5918	23.2143	1.47929	23.9216	0	0	8.92857	1.34228	18.1818	35.1111	23.9669	11.4754	29.2857	7.69231	52.5114	45.5621	38.0952	31.8182	1.72414	22.5806
4930572K03Rik	0	0	0	0	0	0	0	0	0	0	0	0	0	0	0	0	0	0	0	0
4930572O13Rik	0	0	0	0	0	0	0	0	0	0	0	0	0	0	0	0	0	0	0	0
4930573O16Rik	0	0	0	0	0	0	0	0	0	0	0	0	0	0	0	0	0	0	0	0
4930578C19Rik	0	0	0	0	0	0	0	0	0	0	0	0	0	0	0	0	0	0	0	0
4930578E11Rik	0	0	0	0	0	0	0	0	0	0	0	0	0	0	0	0	0	0	0	0
4930578I06Rik	0	0	0	0	0	0	0	0	0	0	0	0	0	0	0	0	0	0	0	0
4930578M01Rik	1.02041	0	0	1.96078	0	0	1.5625	0	1.0101	0.888889	0.826446	1.63934	2.14286	1.53846	0.913242	2.36686	0.680272	0	0	3.22581
4930578N16Rik	0	0.595238	0.887574	0.784314	0	0.175747	0.223214	0	0	1.33333	4.13223	1.63934	5.71429	3.07692	2.73973	2.95858	0.680272	0	0	3.22581
4930578N18Rik	0	0	0	0	0	0	0	0	0	0	0	0	0	0	0	0	0	0	0	0
4930579C15Rik	0	0	0	0	0	0	0	0	1.0101	0	0	0	0	0	0	0	0	0	0	0
4930579F01Rik	0	0	0	0	0	0	0	0	0	0	0	0	0	0	0	0	0	0	0	0
4930579G18Rik	0	0	0	0.392157	0	0	0.223214	0	0	0.444444	0	0	0.714286	1.53846	0	0.591716	0	0	0	3.22581
4930579G22Rik	0	0	2.36686	0.392157	0.806452	1.93322	0.446429	0	1.0101	2.66667	1.65289	1.63934	4.28571	3.07692	0.456621	1.77515	2.04082	0.909091	0	3.22581
4930579G24Rik	19.3878	4.7619	37.2781	35.2941	0	0.527241	3.34821	1.34228	39.3939	52.4444	62.8099	21.3115	33.5714	4.61538	1.82648	47.3373	46.2585	1.81818	0	9.67742
4930579K19Rik	0	0.595238	0.295858	1.96078	0	0.878735	0.669643	0	2.0202	2.22222	0	0	5	0	0.913242	2.36686	2.04082	0.909091	0.862069	3.22581
4930581F22Rik	2.04082	2.97619	3.5503	1.96078	0.806452	0.878735	0.892857	0	3.0303	5.77778	0.826446	6.55738	4.28571	1.53846	5.47945	1.77515	6.12245	0.909091	0.862069	0
4930583H14Rik	0	0	0	0	0	0	0	0	0	0	0	0	0	0	0	0	0	0	0	3.22581
4930583K01Rik	0	0	0	0	0	0	0	0	0	0	0	0	0	0	0	0.591716	0	0.909091	0	0
4930583P06Rik	0	0	0	0	0	0	0	0	0	0	0	0	0	0	0	0	0	0	0	0
4930584F24Rik	0	0	0	0	0	0	0	0	0	0	0	0	0	0	0	0	0	0	0	0
4930588N13Rik	0	0	0	0	0	0	0	0	0	0	0.826446	0	0.714286	0	0	0	0	0	0	0
4930590J08Rik	1.02041	0	0	0	0	0	0	0	0	0	0	0	0	0	0	0	0	0	0	0
4930590L20Rik	0	0	0	0	0	0	0	0	0	0	0	0	0	0	0	0	0	0	0	0
4930591A17Rik	0	0	0	0	0	0	0	0	0	0	0	0	0	0	0	0	0	0	0	0
4930592A05Rik	0	0	0	0	0	0	0	0	0	0	0	0	0	0	0	0	0	0	0	0
4930592I03Rik	0	0	0	0	0	0	0	0	0	0	0	0	0	0	0	0	0	0	0	0
4930593A02Rik	0	0	0	0	0	0	0	0	0	0.444444	0	0	0	0	0	0	0	0	0	0
4930593C16Rik	0	0	0	0	0	0	0	0	0	0	0	0	0	0	0	0	0	0	0	0
4930594C11Rik	2.04082	1.78571	0.591716	1.17647	0.806452	0.878735	0.669643	0	1.0101	0.888889	0.826446	1.63934	2.14286	0	5.93607	2.95858	0	1.81818	0	6.45161
4930595M18Rik	0	0	0	0	0	0	0	0	0	0	0	0	0	0	0	0	0	0	0	0
4930596D02Rik	0	0	0	0	0	0	0	0	0	0	0	0	0	0	0	0	0	0	0	0
4930596M17Rik	0	0	0	0	0	0	0	0	0	0	0	0	0	0	0	0	0	0	0	0
4930597G03Rik	0	0	0	0	0	0	0	0	0	0	0	0	0	0	0	0	0	0	0	0
4930598F16Rik	0	0	0	0	0	0	0	0	0	0	0	0	0	0	0	0	0	0	0	0
4930599N23Rik	0	0	0.295858	0.392157	0.806452	0	0.892857	0	0	0	0	0	0.714286	0	0	0	0	0	0	0
4931402G19Rik	0	0	0	0	0	0	0	0	0	4	0	0	0	0	0	0	0	0	0	0
4931403E22Rik	0	0	0	0	0	0	0	0	0	0	0	0	0	0	0	0	0	0	0	0
4931403G20Rik	0	0	0	0	0	0	0	0	0	0	0	0	0	0	0	0	0	0	0	0
4931406B18Rik	0	0	0	0	0	0	0	0	0	0	0	0	0	0	0	0	0	0	0	0
4931406C07Rik	8.16327	1.19048	5.91716	10.5882	4.03226	3.16344	6.25	1.34228	6.06061	20	1.65289	4.91803	26.4286	9.23077	15.9817	8.87574	2.72109	1.81818	0.862069	6.45161
4931406H21Rik	1.02041	0.595238	0	0	0.806452	0	0.446429	0	0	0	0	1.63934	2.85714	0	1.36986	0.591716	0.680272	0.909091	0	0
4931406P16Rik	6.12245	5.95238	2.95858	6.66667	1.6129	2.6362	5.80357	1.34228	12.1212	8	17.3554	9.83607	20	10.7692	6.84932	14.7929	18.3673	6.36364	21.5517	3.22581
4931407G18Rik	0	0	0	0	0	0	0	0	0	0	0	0	0	0	0	0	0	0	0	0
4931408A02Rik	0	0	0	0	0	0	0	0	0	0	0	0	0	0	0	0	0	0	0	0
4931408C20Rik	0	0	0	0.392157	0	0	0	0	0	0	0	0	0	0	0	0	0	0	0	0
4931408D14Rik	1.02041	0	0	0.392157	0	0	0.446429	0	0	0.444444	0	0	0	0	0	0	0	0	0	0
4931409K22Rik	0	0	0	0	0	0	0	0	0	0	0	0	0	0	0	0	0	0	0	0
4931414P19Rik	4.08163	1.19048	1.77515	3.13725	0.806452	0.702988	1.5625	0	6.06061	4.88889	4.95868	3.27869	6.42857	4.61538	1.82648	2.95858	3.40136	1.81818	0	0
4931417E11Rik	0	0	0	0	0	0	0	0	0	0	0	0	0	0	0	0	0	0	0	0
4931417G12Rik	0	0	0	0	0	0	0	0	0	0.444444	0	0	0	0	0	0	0	0	0	0
4931419H13Rik	0	0	0	0	0	0	0	0	0	0	0	0	0	0	0	0	0	0	0	0
4931420L22Rik	0	0	0	0	0	0	0	0	0	0	0	0	0	0	0	0	0	0	0	0
4931423N10Rik	0	0	0	0	0	0	0	0	0	0	0	0	0	0	0	0	0	0	0	0
4931428F04Rik	4.08163	1.78571	0.295858	1.56863	0	0	0.223214	0	5.05051	5.77778	5.78512	3.27869	6.42857	3.07692	4.56621	5.32544	1.36054	0.909091	0.862069	0
4931428L18Rik	0	0	0	0	0.806452	0	0	0	0	0	0	0	0.714286	0	0	0	0	0	0	0
4931429I11Rik	0	0	0	0	0	0	0	0	0	0	0	0	0	0	0	0	0	0	0	3.22581
4931429L15Rik	0	0	0	0	0	0	0	0	0	0	0	0	0	0	0	0	0	0	0	0
4931429P17Rik	0	0	0	0	0	0	0	0	0	0	0	0	0	0	0	0	0	0	0	0
4931430N09Rik	0	0	0	0	0	0	0	0	0	0	0	0	0	0	0	0	0	0	0	0
4931431B13Rik	0	0	0	0	0	0	0	0	0	0	0	0	0	0	0	0	0	0	0	0
4931431C16Rik	0	0	0.295858	1.96078	0	0	0.223214	0	3.0303	0.444444	0	0	0.714286	0	0	0.591716	0	0	0	0
4931431F19Rik	0	0	0	0	0	0	0	0	0	0	0	0	0	0	0	0	0	0	0	0
4931440F15Rik	0	0	0	0	0	0	0.669643	0	0	0	0	0	1.42857	0	0.913242	0	0	0	0	0
4931440J10Rik	0	0	0	0	0	0	0	0	0	0	0	0	0	0	0	0	0	0	0	0
4931440L10Rik	0	0	0	0	0	0	0	0	0	0	0	0	0	0	0	0	0	0	0	0
4931440P22Rik	16.3265	2.38095	4.43787	14.902	1.6129	1.23023	7.36607	0.671141	15.1515	12.8889	13.2231	6.55738	18.5714	7.69231	11.4155	13.6095	2.72109	9.09091	1.72414	19.3548
4932411E22Rik	0	0	0	0	0	0	0	0	0	0	0	0	0	0	0	0	0	0	0	0
4932411G14Rik	0	0	0	0	0	0	0	0	0	0	0	0	0	0	0	0	0	0	0	0
4932411L15	0	0	0	0	0	0	0	0	0	0	0	0	0	0	0	0	0	0	0	0
4932411N23Rik	0	0	0	0	0	0	0	0	0	0	0	1.63934	0	0	0	0	0	0	0	0
4932412D23Rik	0	0	0	0.392157	0	0	0	0	0	0	0	0	0	0	0	0	0	0	0	0
4932412H11Rik	1.02041	0	0	0.392157	0	0.175747	0	0	0	0	0	1.63934	0	0	0	1.77515	0	0	0	0
4932413F04Rik	0	0	0	0	0	0	0	0	0	0	0	0	0	0	0	0	0	0	0	0
4932414J04Rik	0	0	0	0	0	0	0	0	0	0	0	0	0	0	0	0	0	0	0	0
4932414N04Rik	0	0	0	0	0	0	0	0	0	0	0	0	0	0	0	0	0	0	0	0
4932415G12Rik	3.06122	1.19048	4.43787	5.4902	0	0.175747	1.78571	0	4.0404	12.8889	9.09091	3.27869	9.28571	1.53846	3.19635	7.69231	12.2449	2.72727	0	9.67742
4932415M13Rik	0	0	0	0	0	0	0	0	0	0	0	0	0	0	0	0	0	0	0	0
4932416H05Rik	3.06122	0	2.07101	2.35294	1.6129	0.878735	0.223214	0	2.0202	1.77778	2.47934	0	6.42857	0	1.36986	1.18343	0.680272	3.63636	0	0
4932416K20Rik	0	0	0	0	0	0	0	0	0	0	0	0	0	0	0	0	0	0	0	0
4932418E24Rik	0	0	0	0	0	0	0	0	0	0	0	0	0	0	0	0	0	0	0	0
4932425I24Rik	0	0	0	0	0	0	0	0	0	0	0	0	0	0	0	0	0	0	0	0
4932429P05Rik	0	0	0	0	0	0	0	0	0	0	0	0	0	0	0	0	0	0	0	0
4932435O22Rik	0	0	0	0	0	0	0	0	0	0	0	0	0.714286	0	0	0	0	0	0	0
4932438A13Rik	31.6327	25.5952	28.1065	25.8824	19.3548	22.4956	14.9554	2.68456	31.3131	40	25.6198	27.8689	34.2857	29.2308	21.0046	37.8698	26.5306	19.0909	0.862069	6.45161
4932438H23Rik	0	0	0	0	0	0	0	0	0	0	0	1.63934	0	0	0	0	0	0.909091	0	0
4932441B19Rik	0	0	0	0	0	0	0	0	0	0	0	0	0	0	0	0	0	0	0	0
4932441J04Rik	0	0	0	0	0	0	0	0	0	0	0	0	0	0	0	0	0	0	0	0
4932443I19Rik	0	0	0	0	0	0	0	0	0	0	0	0	0	0	0	0	0	0	0	0
4932702P03Rik	0	0	0	0	0	0	0	0	0	0	0	0	0	0	0	0	0	0	0	0
4933400A11Rik	0	0	0	0	0	0	0	0	0	0	0	0	0	0	0	0	0	0	0	0
4933400B14Rik	0	0	0	0	0	0	0	0	0	0	0	0	0	0	0	0	0	0	0	0
4933400C05Rik	1.02041	0	0	0.392157	0	0	0	0	0	0	0	0	0	0	0	0	0	0	0	0
4933400C23	0	0	0	0	0	0	0	0	0	0	0	0	0	0	0	0	0	0	0	0
4933400F21Rik	0	0	0	0	0	0	0	0	0	0	0	0	0	0	0	0	0	0	0	0
4933400L20Rik	0	0	0	0	0	0	0	0	0	0	0	0	0	0	0	0	0	0	0	0
4933401B06Rik	0	0	0	0	0	0	0	0	0	0.444444	0	0	0	0	0	0.591716	0	0	0	0
4933401D09Rik	0	0	0	0	0	0	0	0	0	0	0	0	0	0	0	0	0	0	0	0
4933401H06Rik	0	0	0	0	0	0	0	0	0	0	0	0	0	0	0	0	0	0	0	0
4933401P06Rik	0	0	0	0	0	0	0	0	0	0	0	0	0	0	0	0	0	0	0	0
4933402C06Rik	0	0	0	0	0	0	0	0	0	0	0	0	0	0	0	0	0	0	0	0
4933402D24Rik	0	0	0	0	0	0	0	0	0	0	0	0	0	0	0	0	0	0	0	0
4933402E13Rik	0	0	0	0	0	0	0	0	0	0	0	0	0	0	0	0	0	0	0	0
4933402J07Rik	0	0	0	0	0	0	0	0	0	0	0	0	0	0	0	0	0	0	0	0
4933402J10Rik	0	0	0	0	0	0	0	0	0	0	0	0	0	0	0	0	0	0	0	0
4933402J15Rik	0	0	0	0	0	0	0	0	0	0	0	0	0	0	0	0	0	0	0	0
4933402N03Rik	0	0	0	0	0	0	0	0	0	0	0	0	0	0	0	0	0	0	0	0
4933402N22Rik	0	0	0	0	0	0	0	0	0	0	0	0	0	0	0	0	0	0	0	0
4933402P03Rik	0	0	0	0	0	0	0	0	0	0	0	0	0	0	0	0	0	0	0	0
4933403F05Rik	5.10204	3.57143	12.426	14.902	0	2.6362	3.125	0.671141	7.07071	41.3333	5.78512	9.83607	25	7.69231	5.93607	17.1598	12.2449	2.72727	3.44828	3.22581
4933403G14Rik	5.10204	0.595238	2.36686	3.52941	0.806452	0.351494	1.33929	0.671141	1.0101	2.66667	2.47934	1.63934	1.42857	0	0.913242	3.5503	0	0	0	0
4933403O08Rik	0	0	0	0	0	0	0	0	0	0	0	0	0	0	0	0	0	0	0	0
4933404G15Rik	0	0	0	0	0	0	0	0	0	0	0	0	0	0	0	0	0	0	0	0
4933404K08Rik	0	0	0	0	0	0	0	0	0	0	0.826446	0	0	0	0	0	0	0	0	0
4933404M02Rik	0	0	0	0	0	0	0	0	0	0	0	0	0	0	0	0	0	0	0	0
4933404O12Rik	2.04082	0	0	7.45098	0	0.175747	0.446429	0	5.05051	16.4444	3.30579	3.27869	7.14286	3.07692	0.913242	3.5503	5.44218	0	0	0
4933405D12Rik	0	0	0	0.392157	0	0	0	0	0	0	0	0	0	0	0	0	0	0	0	0
4933405E24Rik	0	0	0	0	0	0	0	0	0	0	0	0	0	0	0	0	0	0	0	0
4933405L10Rik	0	0	0	0	0	0	0	0	0	0	0	0	0	0	0	0	0	0	0	0
4933405O20Rik	0	0	0	0	0	0	0	0	0	0	0	0	0	0	0	0	0	0	0	0
4933406C10Rik	0	0.595238	0.591716	0.392157	0	0	0.223214	0	0	2.22222	0.826446	0	2.14286	0	0	0	0.680272	0	0	0
4933406D12Rik	0	0	0	0	0	0	0	0	0	0	0	0	0	0	0	0	0	0	0	0
4933406F09Rik	0	0	0	0	0	0	0	0	0	0	0	0	0	0	0	0	0	0	0	0
4933406G16Rik	0	0	0	0	0	0	0	0	0	0	0	0	0	0	0	0	0	0	0	0
4933406I18Rik	1.02041	0.595238	0	0	0.806452	0	0	0	0	0	0	0	0.714286	0	0	0.591716	0	0.909091	0	0
4933406J08Rik	0	0	0	0	0	0	0	0	0	0	0	0	0	0	0	0	0	0	0	0
4933406J10Rik	0	0	0	0	0	0	0	0	0	0	0	0	0	0	0	0	0	0	0	0
4933406K04Rik	0	0	0	0	0	0	0	0	0	0	0	0	0	0	0	0	0	0	0	0
4933406M09Rik	0	0	0	0	0	0	0	0	0	0	0	0	0	0	0	0	0	0	0.862069	0
4933407C03Rik	42.8571	27.381	47.0414	52.9412	34.6774	33.7434	44.4196	3.3557	72.7273	56	41.3223	36.0656	54.2857	35.3846	30.137	42.0118	48.2993	17.2727	7.75862	19.3548
4933407E24Rik	0	0	0	0	0	0	0	0	0	0	0	0	0	0	0	0	0	0	0	0
4933407G14Rik	0	0	0	0	0	0	0	0	0	0	0	0	0	0	0	0	0	0	0	0
4933407H18Rik	13.2653	3.57143	10.6509	10.9804	3.22581	2.46046	7.8125	2.01342	10.101	20	6.61157	13.1148	11.4286	4.61538	15.5251	6.50888	15.6463	7.27273	1.72414	22.5806
4933407I05Rik	0	0	0	0	0	0	0	0	0	0	0	0	0	0	0	0	0	0	0	0
4933407K13Rik	5.10204	0	0.591716	1.96078	0	0	0.446429	0	3.0303	2.66667	4.13223	1.63934	7.85714	4.61538	0.456621	4.14201	0	3.63636	0	3.22581
4933407L21Rik	0	0	0	0	0	0	0	0	0	0	0	0	0	0	0	0	0	0	0	0
4933407P14Rik	0	0	0	0	0	0	0	0	0	0	0	0	0	0	0	0	0	0	0	0
4933408B17Rik	4.08163	2.97619	7.69231	2.35294	24.1935	20.3866	1.33929	2.01342	4.0404	5.33333	5.78512	3.27869	1.42857	0	0.456621	2.36686	2.04082	1.81818	1.72414	0
4933408J17Rik	0	0	0	0.392157	0	0	0	0	0	0.444444	0	0	0	0	0	0	0.680272	0	0	0
4933408N05Rik	0	0	0	0	0	0	0	0	0	0	0	0	0	0	0	0	0	0	0	0
4933409G03Rik	0	0	0	0	0	0	0	0	0	0	0	0	0	0	0	0	0	0	0	0
4933409K07Rik	0	0	0.591716	0	0	0	0.223214	0	0	0.444444	0	0	0	0	0.456621	0	1.36054	0	0	3.22581
4933411E08Rik	0	0	0	0	0	0	0	0	0	0	0	0	0.714286	0	0	0	0	0	0	0
4933411G06Rik	0	0	0	0	0	0	0	0	0	0	0	0	0	0	0	0	0	0	0	0
4933411G11Rik	0	0	0	0	0	0	0	0	0	0	0	0	0	0	0	0.591716	0	0	0	0
4933411K16Rik	0	0	0	0	0	0	0	0	0	0	0	0	0	0	0	0	0	0	0	0
4933411K20Rik	25.5102	9.52381	15.6805	17.6471	0.806452	2.6362	8.92857	0	11.1111	28.8889	17.3554	21.3115	27.1429	23.0769	12.7854	21.8935	14.966	13.6364	0	0
4933412E12Rik	2.04082	1.78571	0	3.13725	0	0.351494	2.45536	0	3.0303	1.77778	8.26446	1.63934	5.71429	15.3846	1.82648	6.50888	0.680272	0.909091	0	3.22581
4933412E24Rik	0	0	0	0	0	0	0	0	0	0	0	0	0	0	0	0	0	0	0	0
4933412O06Rik	0	0	0	0	0.806452	1.05448	0	0	0	0	0	0	0	0	0	0	0	0	0	0
4933413G19Rik	0	0	0	0	0	0	0	0	0	0	0.826446	0	0	0	0	0	0	0	0	0
4933413J09Rik	0	0	0	0	0	0	0	0	0	0	0.826446	0	0	0	0	0	0	0	0	0
4933413L06Rik	0	0	0	0	0	0	0	0	0	0	0	0	0	0	0	0	0	0	0	0
4933415F23Rik	0	0	0	0	0	0	0	0	0	0	0	0	0	0	0	0	0	0	0	0
4933416C03Rik	0	0	0	0	0	0	0	0	0	0	0	0	0	0	0	0	0	0	0	0
4933416E03Rik	0	0	0	0	0	0	0	0	0	0	0	0	0	0	0	0	0	0	0	0
4933416I08Rik	0	0	0	0	0	0	0	0	0	0	0	0	0	0	0	0	0	0	0	0
4933416M06Rik	0	0	0	0	0	0	0	0	0	0	0	0	0	0	0	0	0	0	0	0
4933416M07Rik	0	0	0	0	0	0	0	0	0	0	0	1.63934	0	0	0	0	0	0	0	0
4933417A18Rik	0	0	0	0	0	0	0	0	0	0	0	0	0	0	0	0	0	0	0	0
4933417D19Rik	0	0	0	0.392157	0	0	0.223214	0	0	0	0	0	0	0	0	0	0	0	0	0
4933417E11Rik	0	0	0	0.392157	0	0	0.892857	0	0	0	0	0	0	0	0	0	0	0	0	0
4933417G07Rik	0	0	0	0	0	0	0	0	0	0	0	0	0	0	0	0	0	0	0	0
4933417O13Rik	0	0	0	0	0	0	0	0	0	0	0	0	0	0	0	0	0	0	0	0
4933421E11Rik	19.3878	13.0952	30.7692	16.4706	4.83871	11.2478	12.5	0	30.303	40.4444	27.2727	22.9508	23.5714	12.3077	11.8721	20.7101	9.52381	15.4545	0	22.5806
4933421I07Rik	0	0	0	0	0	0	0	0	0	0	0	0	0	0	0	0	0	0	0	0
4933421O10Rik	14.2857	5.35714	3.84615	8.23529	0.806452	2.28471	6.25	0	14.1414	14.6667	5.78512	3.27869	11.4286	15.3846	5.93607	10.6509	6.80272	2.72727	0	54.8387
4933422A05Rik	0	0	0	0	0	0	0	0	0	0	0	0	0	0	0	0	0.680272	0	0	0
4933422H20Rik	0	0	0	0	0	0	0	0	0	0	0	0	0	0	0	0	0	0	0	0
4933424B01Rik	19.3878	7.14286	24.8521	32.9412	5.64516	11.4236	9.375	5.36913	23.2323	43.1111	33.0579	11.4754	30.7143	18.4615	18.7215	33.7278	35.3741	8.18182	17.2414	22.5806
4933424G05Rik	0	0	0	0	0	0	0	0	0	0	0	0	0	0	0	0	0	0	0	0
4933424G06Rik	0	0	0	0	0	0	0	0	0	0	0	0	0	0	0	0	0	0.909091	0	0
4933425B07Rik	0	0	0	0	0	0	0	0	0	0	0	0	0	0	0	0	0	0	0	0
4933425H06Rik	0	0	0	0	0	0	0	0	0	0	0	0	0	1.53846	0	0	0	0	0	0
4933425L06Rik	0	0	0	0	0	0	0	0	0	0	0	0	0	0	0	0	0	0	0	0
4933425O20Rik	0	0	0	0	0	0	0	0	0	0	0	0	0	0	0	0	0	0	0	0
4933426D04Rik	0	0	0	0	0	0	0	0	0	0	0	0	0	0	0	0	0	0	0	0
4933426M11Rik	17.3469	11.9048	23.0769	32.9412	20.1613	13.3568	29.2411	4.02685	30.303	26.2222	6.61157	19.6721	28.5714	1.53846	15.5251	7.10059	23.1293	9.09091	6.89655	22.5806
4933427D06Rik	0	0	0	0	0	0	0	0	0	0	0	0	0	0	0	0	0	0	0	0
4933427D14Rik	5.10204	3.57143	5.02959	4.70588	0.806452	1.23023	2.00893	0	6.06061	8.88889	9.09091	3.27869	15	3.07692	5.47945	19.5266	3.40136	0.909091	0	0
4933427E11Rik	1.02041	0	0	0	0	0	0.223214	0	0	0	0	0	0	0	0	0	0.680272	0	0	0
4933427E13Rik	0	0	0	0	0	0	0	0	0	0	0	0	0	0	0	0	0	0	0	0
4933427G17Rik	0	0.595238	0	0	0	0	0	0	1.0101	0	0.826446	1.63934	0	0	0	0	0	0	0	0
4933427I22Rik	0	0	0	0	0	0	0	0	0	0	0	0	0	0	0	0	0	0	0	0
4933428C19Rik	0	0	0	0	0	0	0	0	0	0	0	0	0	0	0	0	0	0	0	0
4933429K18Rik	0	0	0	0	0	0	0	0	0	0	0	0	0	0	0	0	0	0	0	0
4933429O19Rik	0	0	0	0	0	0	0	0	0	0	0	0	0	0	0	0	0	0	0	0
4933430H15Rik	0	0	0	0	0	0	0	0	0	0	0	0	0.714286	0	0	0	0	0	0	0
4933430H16Rik	0	0	0	0	0	0	0	0	0	0	0	0	0	0	0	0	0	0	0	0
4933430I17Rik	0	0	0	0.392157	0	0	0	0	0	0.888889	0	0	0.714286	1.53846	0	0.591716	0	0	0	3.22581
4933430M04Rik	0	0	0	0	0	0	0	0	0	0	0	0	0	0	0	0	0	0	0	0
4933430N04Rik	0	0	0	0	0	0	0	0	0	0	0	0	0	0	0	0	0	0	0	0
4933431E20Rik	0	0	0	0	0	0.175747	0	0	0	0.888889	0	0	2.85714	0	0	0	5.44218	0	2.58621	0
4933431G14Rik	0	0	0	0	0	0	0	0	0	0	0	0	0	0	0	0	0	0	0	0
4933432B09Rik	0	0.595238	0.295858	0.392157	0.806452	0.702988	0.223214	0	0	0.888889	0	0	0	0	0.456621	0.591716	0	0	0	0
4933432G23Rik	0	0	0	0	0	0	0	0	0	0	0	0	0	0	0	0	0	0	0	0
4933432I03Rik	0	0	0	0	4.03226	0.175747	0.223214	0	0	0	0	0	0	0	0	0	0.680272	0	0	3.22581
4933432I09Rik	0	0	0	0	0	0	0	0	0	0	0	0	0	0	0	0	0	0	0	0
4933433C11Rik	0	0	0	0	0	0	0	0	0	0	0	0	0	0	0	0	0	0	0	0
4933433F19Rik	0	0	0	0	0	0	0	0	0	0	0	0	0	0	0	0	0	0	0	0
4933433G15Rik	12.2449	1.78571	0.591716	5.09804	0	0.351494	4.24107	0	5.05051	5.77778	3.30579	8.19672	4.28571	3.07692	2.28311	2.36686	1.36054	4.54545	0	0
4933433G19Rik	0	0	0	0	0	0	0	0	0	0	0	0	0	0	0	0	0	0	0	0
4933433H22Rik	0	0	0	0	0	0	0.446429	0	0	0	0	0	0	0	0	0	0	0	0	0
4933433P14Rik	21.4286	14.2857	27.2189	31.7647	16.9355	13.5325	15.625	2.68456	28.2828	44.8889	12.3967	26.2295	22.8571	13.8462	16.4384	20.7101	12.2449	13.6364	0.862069	16.129
4933434E20Rik	37.7551	17.8571	26.3314	45.098	5.64516	11.2478	24.1071	4.69799	36.3636	65.7778	27.2727	36.0656	45.7143	41.5385	26.0274	37.2781	28.5714	20	3.44828	58.0645
4933434I20Rik	0	0	0	0	0	0	0	0	0	0	0	0	0	0	0	0	0	0	0	0
4933436C20Rik	1.02041	0	0	1.96078	0	0.175747	0.223214	0	1.0101	5.33333	0.826446	1.63934	2.14286	0	0	1.77515	4.08163	0	0	0
4933436E23Rik	0	0	0	0	0	0	0	0	0	0	0	0	0	0	0	0	0	0	0	0
4933436H12Rik	0	0	0	0	0	0	0	0	0	0	0	0	0	0	0	0	0	0	0	0
4933436I01Rik	0	0	0	0	0	0	0	0	0	0	0	0	0	0	0	0	0	0	0	0
4933437F05Rik	0	0.595238	0.295858	1.96078	0	0.878735	0.669643	0	1.0101	1.77778	0	0	2.14286	0	0.913242	0	0.680272	2.72727	0	0
4933438B17Rik	0	0	0	0	0	0	0	0	0	0	0	0	0	0	0	0	0	0	0	0
4933438K21Rik	0	0	0	0	0	0	0	0	0	0	0	0	0	0	0	0	0	0	0	0
4933439C10Rik	5.10204	2.97619	1.47929	6.27451	0	0.175747	0.892857	0.671141	5.05051	9.77778	26.4463	8.19672	8.57143	24.6154	5.93607	14.7929	0	5.45455	0	0
4933439F18Rik	14.2857	7.14286	15.0888	24.7059	0	0.702988	5.58036	0	5.05051	44.4444	9.09091	22.9508	35	12.3077	13.6986	27.8107	27.2109	7.27273	0.862069	19.3548
4933439K11Rik	0	0	1.18343	0.392157	0.806452	0.175747	0.446429	0	0	0.444444	0	0	0	3.07692	0	0	0	0	0	0
4933440J02Rik	0	0	0	0	0	0	0	0	0	0	0	0	0	0	0	0	0	0	0	0
4933440M02Rik	0	0.595238	0	0.392157	0	0	0	0	0	8.44444	0	0	0	0	0	0	0	0	0	0
5031410I06Rik	0	0	0	0	0	0	0	0	0	0	0	0	0	0	0	0	0	0	0	0
5031414D18Rik	19.3878	0	3.5503	8.23529	0.806452	3.51494	3.79464	0.671141	8.08081	2.66667	12.3967	1.63934	10	4.61538	24.2009	7.69231	0.680272	14.5455	0	3.22581
5031425E22Rik	40.8163	25.5952	24.8521	51.7647	14.5161	16.5202	31.0268	2.68456	41.4141	62.2222	36.3636	63.9344	59.2857	38.4615	28.7671	38.4615	19.0476	16.3636	13.7931	45.1613
5031425F14Rik	0	4.16667	2.95858	1.56863	0	1.05448	2.90179	0	4.0404	2.22222	0	0	0	1.53846	0	0	0	0.909091	0.862069	3.22581
5031426D15Rik	0	0	0	0	0	0	0.223214	0	0	0	0	0	3.57143	1.53846	0	0	0	0	0	0
5031434C07Rik	0	0	0	0	0	0	0	0	0	0	0	0	0	0	0	0	0	0	0	0
5031434O11Rik	1.02041	0	0.591716	0.784314	0	0.175747	0.223214	0	0	0.444444	0	1.63934	0	0	0	0	0.680272	0	0	0
5031439G07Rik	33.6735	2.97619	5.91716	32.9412	7.25806	3.69069	15.8482	3.3557	45.4545	13.3333	13.2231	0	11.4286	7.69231	15.0685	18.3432	1.36054	3.63636	1.72414	6.45161
5033403H07Rik	0	0	0	0	0	0	0.223214	0	0	0	0	0	0	0	0	0	0	0	0	0
5033404E19Rik	0	0	0	0	0	0	0	0	0	0	0	0	0	0	0	0	0	0	0	0
5033406O09Rik	6.12245	0.595238	0.295858	9.80392	0	0.351494	1.33929	6.71141	2.0202	21.7778	0.826446	13.1148	33.5714	4.61538	5.93607	5.32544	6.12245	0	5.17241	0
5033411D12Rik	1.02041	0.595238	0	0.392157	0	0.175747	0.223214	0	1.0101	3.55556	0	0	1.42857	0	0.456621	0.591716	0	0	0	0
5033414D02Rik	28.5714	17.2619	29.5858	51.7647	4.03226	7.55712	22.0982	4.69799	51.5152	76	41.3223	67.2131	55.7143	43.0769	34.2466	44.3787	31.2925	31.8182	0	51.6129
5133401N09Rik	34.6939	46.4286	32.5444	51.3725	15.3226	14.4112	41.7411	3.3557	58.5859	73.3333	40.4959	31.1475	42.1429	40	32.4201	49.7041	23.1293	16.3636	5.17241	38.7097
5330411J11Rik	0	0	0	0	0	0	0	0	0	0	0	0	0	0	0	0	0	0	0	0
5330413P13Rik	0	0	0	0	0	0	0	0	0	0	0	0	0	0	0	0	0	0	0	0
5330417C22Rik	0	0	0	0.784314	0	0.175747	0	0	0	0.888889	0	1.63934	0	0	0	0	0	0	0	0
5330426P16Rik	7.14286	1.19048	6.80473	5.09804	8.87097	5.09666	2.23214	0	9.09091	3.11111	3.30579	6.55738	2.85714	1.53846	0.913242	2.95858	0	0.909091	0	3.22581
5330434G04Rik	0	0	0	0	0	0	0	0	0	0	0	0	0	0	0	0	0	0	0	0
5330437I02Rik	0	0	0	0	0	0	0	0	0	0	0	0	0	0	0	0	0	0	0	0
5330439B14Rik	0	0	0	0	0	0	0	0	0	0	0	0	0	0	0	0	0	0	0	0
5430401F13Rik	0	0	0	0	0	0	0	0	0	0	0	0	0	0	0	0	0	0	0	0
5430402E10Rik	0	0	0	0	0	0	0	0	0	0	0	0	0	0	0	0	0	0	0	0
5430402O13Rik	0	0	0.295858	1.17647	0.806452	0.702988	0.223214	0	1.0101	2.66667	0.826446	0	0.714286	4.61538	1.36986	0.591716	2.72109	0.909091	0	0
5430403N17	0	0	0	0	0	0	0	0	0	0	0	0	0	0	0	0	0	0	0	0
5430405G05Rik	0	0	0	0	0	0	0	0	0	0	0	0	0	0	0	0	0	0	0	0
5430405H02Rik	7.14286	6.54762	7.39645	9.41176	7.25806	4.04218	3.57143	0.671141	6.06061	10.6667	6.61157	1.63934	10	6.15385	6.84932	7.69231	2.72109	5.45455	3.44828	0
5430407P10Rik	5.10204	0	0	0.784314	0	0	0.446429	0	0	0	0	0	6.42857	0	0	0	1.36054	0	0.862069	0
5430411K18Rik	11.2245	1.78571	7.98817	8.23529	1.6129	3.33919	3.34821	1.34228	11.1111	7.55556	16.5289	6.55738	11.4286	9.23077	4.56621	14.7929	6.12245	2.72727	0.862069	0
5430416N02Rik	13.2653	5.35714	3.25444	14.1176	0	0.527241	4.6875	0	8.08081	33.7778	9.91736	3.27869	25	10.7692	3.19635	15.3846	3.40136	1.81818	0	12.9032
5430416O09Rik	0	0	0	0	0	0	0	0	0	0	0	0	0	0	0	0	0	0	0	0
5430417L22Rik	11.2245	3.57143	8.28402	9.80392	1.6129	2.10896	3.79464	0	6.06061	31.1111	13.2231	13.1148	22.8571	24.6154	26.484	24.2604	9.52381	2.72727	0.862069	0
5430419D17Rik	0	0	0	0	0	0	0	0	0	0	0	0	0	0	0	0	0	0	0	0
5430421F17Rik	0	0	0	0	0	0	0	0	0	0	0	0	0	0	0	0	0	0	0	0
5430421N21Rik	1.02041	2.38095	18.0473	0.392157	21.7742	25.4833	1.33929	1.34228	1.0101	1.77778	0.826446	1.63934	4.28571	0	0.913242	1.18343	0.680272	2.72727	0.862069	3.22581
5430425J12Rik	0	0	0	0	0	0	0	0	0	0	0.826446	0	0	0	0	0	0	0	0	0
5430427M07Rik	0	0	0	0	0	0	0	0	0	0	0	0	0	0	0	0	0	0	0	0
5430427O19Rik	24.4898	3.57143	1.77515	15.2941	9.67742	1.23023	12.0536	0.671141	16.1616	18.6667	10.7438	9.83607	20	7.69231	17.3516	10.0592	1.36054	10.9091	0	12.9032
5430428K19Rik	0	0	0	0	0	0	0	0	0	0	0	0	0	0	0	0	0	0	0	0
5430434I15Rik	0	0	0	0	0	0	0	0	0	0	0	0	0	0	0	0	0	0	0	0
5430435G22Rik	15.3061	0.595238	1.18343	17.2549	0	0	8.03571	0.671141	9.09091	27.5556	0	0	7.14286	0	0.913242	0	0.680272	0	0	0
5430437J10Rik	1.02041	0	0	0	0	0	2.23214	0	1.0101	0	0	0	0	0	0	0	0	0	0	3.22581
5430437P03Rik	55.102	20.2381	60.0592	72.9412	6.45161	14.0598	35.0446	2.68456	80.8081	84.8889	62.8099	40.9836	55.7143	41.5385	30.137	56.213	45.5782	23.6364	4.31034	61.2903
5430440P10Rik	0	0	0	0	0	0	0	0	0	0.444444	0	0	0	0	0	0.591716	0	0	0	0
5530400C23Rik	0	0	0	0	0	0	0	0	0	0	0	0	0	0	0	0	0	0	0	0
5530401A14Rik	0	0	0	0	0	0	0	0	0	0	0	0	0	0	0	0	0	0	0	0
5530601H04Rik	16.3265	5.35714	13.0178	17.2549	2.41935	4.04218	11.3839	4.69799	16.1616	24.4444	20.6612	9.83607	22.8571	13.8462	5.93607	15.9763	21.7687	5.45455	3.44828	3.22581
5730403B10Rik	15.3061	3.57143	4.73373	11.3725	0	0.527241	5.13393	0.671141	12.1212	17.7778	27.2727	4.91803	15	12.3077	31.9635	27.2189	6.12245	4.54545	1.72414	12.9032
5730403I07Rik	0	0	0.295858	0	0	0	0	0	0	0	0	0	0	0	0	0	0	0	0	0
5730405O15Rik	0	0.595238	0	0.392157	0	0	0.446429	0	0	0	0	0	0	0	0	0.591716	0.680272	0	0	0
5730408K05Rik	1.02041	7.14286	3.5503	9.41176	0.806452	2.10896	2.45536	0	7.07071	14.2222	6.61157	3.27869	7.14286	6.15385	4.56621	11.2426	4.08163	2.72727	2.58621	3.22581
5730409E04Rik	2.04082	0.595238	0	1.96078	0	0	2.45536	0	1.0101	5.77778	0	0	3.57143	0	3.65297	0.591716	0.680272	0.909091	0	9.67742
5730412P04Rik	0	0	0	0	0	0	0	0	0	0	0	0	0	0	0	0	0	0	0	0
5730416F02Rik	0	0	0	0	0	0	0	0	1.0101	0	0	0	0	0	0	0	0	0	0	0
5730419I09Rik	18.3673	5.35714	22.7811	41.1765	4.83871	4.74517	9.82143	4.02685	47.4747	53.7778	38.843	13.1148	25.7143	10.7692	13.242	38.4615	27.8912	3.63636	11.2069	9.67742
5730420D15Rik	0	0	0	0	0	0	0	0	0	0	0	0	0.714286	1.53846	0	0.591716	0	0	0	3.22581
5730422E09Rik	1.02041	2.38095	0	0	0.806452	0.351494	0	0	0	1.77778	0	0	0.714286	1.53846	0	0.591716	0.680272	0	0	0
5730435O14Rik	0	0	0	0	0.806452	0	0	0	0	0	0	0	0	0	0.456621	0	0	0	0	0
5730437N04Rik	42.8571	15.4762	21.8935	49.4118	3.22581	6.32689	24.7768	2.01342	48.4848	65.7778	38.843	31.1475	45	35.3846	31.9635	45.5621	18.3673	10	3.44828	35.4839
5730455O13Rik	15.3061	15.4762	9.46746	23.1373	0	4.74517	5.35714	0	22.2222	52	22.314	14.7541	25.7143	16.9231	10.9589	33.7278	15.6463	3.63636	0	16.129
5730455P16Rik	13.2653	5.35714	5.6213	16.4706	1.6129	1.93322	5.35714	0	18.1818	16.4444	17.3554	6.55738	17.1429	4.61538	8.6758	16.568	15.6463	4.54545	0	9.67742
5730457N03Rik	0	0	0	0	0	0	0	0	0	0	0	0	0	0	0	0	0	0	0	0
5730460C07Rik	0	0	0	0	0	0	0	0	0	0	0	9.83607	0	0	0	0	3.40136	0	0	0
5730469M10Rik	5.10204	6.54762	3.5503	6.27451	2.41935	1.58172	1.5625	91.2752	2.0202	13.3333	3.30579	13.1148	25.7143	1.53846	5.02283	15.3846	65.9864	17.2727	72.4138	3.22581
5730480H06Rik	1.02041	0	0	0.784314	0	0	0.223214	0	0	1.33333	0	0	1.42857	0	0.913242	0.591716	0.680272	0	0	0
5730494M16Rik	15.3061	10.119	13.6095	23.1373	1.6129	2.46046	7.8125	0.671141	17.1717	36	28.0992	13.1148	20.7143	16.9231	13.6986	34.3195	14.966	5.45455	0	9.67742
5730494N06Rik	34.6939	19.0476	29.8817	31.7647	6.45161	12.1265	24.3304	2.01342	44.4444	54.6667	28.0992	22.9508	40	15.3846	33.79	20.7101	23.8095	17.2727	4.31034	38.7097
5730507C01Rik	1.02041	1.78571	0	1.96078	0	0.351494	1.33929	0	2.0202	1.77778	1.65289	1.63934	2.85714	0	0.913242	3.5503	0	0	0	0
5730508B09Rik	12.2449	10.119	28.6982	30.5882	7.25806	17.3989	20.9821	3.3557	37.3737	37.3333	10.7438	11.4754	11.4286	6.15385	14.1553	10.6509	72.1088	4.54545	25.8621	0
5730522E02Rik	1.02041	0	0	0	0	0	0	0	0	0.444444	0	0	0	0	0	0	0	0	0	0
5730528L13Rik	2.04082	0.595238	52.9586	31.7647	0.806452	11.775	12.5	1.34228	20.202	74.6667	0.826446	26.2295	15	1.53846	0.456621	0.591716	0	0	1.72414	0
5730559C18Rik	0	0	0	0	0	0	0	0	0	0	0.826446	0	0.714286	0	0	0.591716	0	0	0	0
5730577I03Rik	1.02041	0	0	1.96078	0	0	0.223214	0	0	1.77778	0	0	0.714286	1.53846	0	4.14201	0	1.81818	0	0
5730590G19Rik	13.2653	0.595238	12.1302	12.549	0	0.175747	0	0	16.1616	20.8889	20.6612	6.55738	9.28571	0	0	15.3846	16.3265	1.81818	0	3.22581
5830403L16Rik	0	0.595238	0	0	0	0	0	0	0	0	0	0	0	0	0	0	0	0	0	0
5830403M04Rik	0	0	0	0	0	0	0	0	0	0	0	0	0	0	0	0.591716	0	0	0	0
5830411N06Rik	0	0	0	0	0	0	0	0	0	0	0	0	0	0	0	0	0	0	0	0
5830415F09Rik	8.16327	4.16667	3.25444	10.1961	0	0.527241	2.45536	0	8.08081	12.4444	4.95868	4.91803	14.2857	0	3.19635	7.10059	8.84354	4.54545	0.862069	6.45161
5830416I19Rik	3.06122	2.38095	0.591716	1.96078	1.6129	0	0.892857	0	1.0101	1.33333	3.30579	0	4.28571	1.53846	0	2.95858	0.680272	1.81818	0	0
5830416P10Rik	3.06122	20.8333	6.50888	6.66667	9.67742	7.02988	0.669643	0.671141	4.0404	7.55556	19.8347	9.83607	4.28571	23.0769	12.3288	8.87574	2.04082	20	0	41.9355
5830417I10Rik	11.2245	4.7619	5.91716	15.2941	2.41935	1.75747	6.25	0	13.1313	16.4444	6.61157	9.83607	21.4286	6.15385	7.76256	15.9763	10.2041	12.7273	0.862069	6.45161
5830418K08Rik	23.4694	12.5	22.1893	18.4314	0	0.878735	6.25	1.34228	43.4343	38.2222	34.7107	13.1148	27.8571	6.15385	6.84932	31.9527	36.0544	8.18182	0	19.3548
5830418P13Rik	1.02041	0	0	0.392157	0	0	0	0.671141	0	0	0	0	0.714286	1.53846	0.456621	4.14201	0	0	0	6.45161
5830428M24Rik	5.10204	5.95238	4.43787	1.17647	1.6129	5.44815	0.223214	0.671141	0	2.22222	1.65289	3.27869	2.85714	9.23077	8.6758	4.14201	0	9.09091	1.72414	19.3548
5830432E09Rik	5.10204	4.16667	7.69231	3.52941	11.2903	10.1933	4.01786	0.671141	5.05051	10.6667	0	0	5	1.53846	7.30594	1.77515	0.680272	2.72727	0	6.45161
5830433M19Rik	26.5306	5.95238	23.3728	29.8039	3.22581	5.6239	10.9375	0.671141	29.2929	49.7778	37.1901	26.2295	25.7143	13.8462	14.6119	36.0947	35.3741	10	1.72414	19.3548
5830473C10Rik	0	0	0	0	0	0	0	0	0	0	0	0	0	0	0	0	0	0	0	0
5930403L14Rik	0	0	0	0	0	0	0	0	0	0.444444	0	0	2.85714	0	0	0	0.680272	0	0	0
5930412G12Rik	0	0	0	0	0	0	0	0	0	0	0	0	0	0	0	0	0	0	0	0
5930416I19Rik	35.7143	11.3095	45.5621	34.1176	1.6129	1.75747	6.47321	4.02685	66.6667	53.7778	57.8512	37.7049	29.2857	9.23077	21.4612	50.2959	51.7007	10	3.44828	16.129
5930434B04Rik	26.5306	10.119	8.28402	18.8235	0.806452	3.33919	15.1786	0.671141	16.1616	28.8889	23.1405	13.1148	30	12.3077	19.1781	23.6686	12.2449	5.45455	0	9.67742
5930438M14	0	0	0	0	0	0	0	0	0	0	0	0	0	0	0	0	0	0	0	0
6030405A18Rik	0	0	0	0	0	0	0	0	0	0	0	0	0	0	0	0	0	0	0	0
6030407O03Rik	0	0	0	0	0	0	0	0	0	0	0	0	0	0	0	0	0	0	0	0
6030408B16Rik	0	0.595238	0	0.784314	0.806452	0	0.446429	0	1.0101	0.444444	30.5785	0	0	23.0769	0	22.4852	0	0	0	0
6030419C18Rik	0	0	0	0	0	0	0	0	0	0	0	0	0	0	0	0	0	0	0	0
6030422M02Rik	0	0.595238	0	2.35294	0	0.175747	3.34821	0.671141	9.09091	1.33333	1.65289	0	0.714286	1.53846	0	0	2.72109	0.909091	0.862069	6.45161
6030429G01Rik	4.08163	0	0	5.4902	0	0	2.23214	0.671141	7.07071	6.22222	0.826446	1.63934	4.28571	1.53846	0.456621	0	1.36054	0	0	6.45161
6030440G07Rik	0	0	0	0	0	0	0	0	0	0	0	0	0	0	0	0	0	0	0	0
6030446N20Rik	6.12245	2.97619	2.36686	4.31373	0	0.878735	2.90179	0	6.06061	3.11111	3.30579	4.91803	5	4.61538	4.10959	4.73373	0.680272	0.909091	0.862069	6.45161
6030458C11Rik	9.18367	5.95238	10.6509	16.4706	0	0	5.80357	0.671141	5.05051	24.8889	7.43802	11.4754	18.5714	6.15385	7.76256	16.568	35.3741	1.81818	2.58621	0
6030466F02Rik	0	0	0	0	0	0	0	0	0	0	0	0	0	0	0	0	0	0	0	0
6030468B19Rik	1.02041	0	0.295858	0	0	0.175747	0	0	0	0.444444	0	0	0	0	0	0	35.3741	0	15.5172	0
6030498E09Rik	1.02041	0	0	0	0	0	0	0	0	0	0	0	0.714286	1.53846	0	0.591716	0	0	0	0
6230400D17Rik	3.06122	1.19048	0	2.7451	0	0	0.223214	0	1.0101	2.22222	0	0	1.42857	1.53846	1.36986	1.77515	0	0.909091	0	0
6230409E13Rik	0	0	0	0	0	0	0	0	0	0	0	0	0	0	0	0	0	0	0	0
6230427J02Rik	8.16327	3.57143	2.66272	12.1569	0	0.878735	2.45536	0.671141	4.0404	31.1111	11.5702	18.0328	46.4286	40	10.5023	30.1775	39.4558	2.72727	7.75862	16.129
6330403A02Rik	1.02041	0.595238	0	0	0	0	0	0	0	0	0	0	1.42857	0	0	0	0	0.909091	0	0
6330403K07Rik	0	0	0	0	0	0	0	0	0	0.444444	0	0	1.42857	0	0.456621	0	0	0	0	0
6330406I15Rik	0	0	0	0	0	0	0	0	0	0	0	0	0.714286	0	0	0	0	0	0	0
6330407A03Rik	30.6122	2.38095	9.76331	24.7059	8.06452	6.50264	30.1339	1.34228	40.404	6.66667	17.3554	4.91803	15	3.07692	18.2648	17.1598	1.36054	21.8182	0	6.45161
6330407J23Rik	0	0	0	0	0	0	0	0	0	0	0	0	0	0	0	0	0	0	0	0
6330408A02Rik	1.02041	0.595238	2.07101	1.17647	0	0.175747	0.446429	0.671141	3.0303	2.22222	1.65289	3.27869	2.14286	1.53846	0.456621	3.5503	0	2.72727	0.862069	0
6330409D20Rik	0	0	0	0	0	0	0	0	0	0	0	0	0	0	0	0	0	0	0	0
6330409N04Rik	10.2041	8.33333	1.47929	7.45098	0.806452	0.351494	3.125	0	3.0303	16.4444	0	1.63934	15.7143	4.61538	5.02283	2.95858	6.12245	0.909091	0	0
6330410L21Rik	0	0	0	0	0	0	0	0	0	0	0	0	0	0	0	0	0	0	0	0
6330415B21Rik	0	0	0	0	0	0	0	0	0	0	0	0	0	0	0	0	0	0	0	0
6330416G13Rik	24.4898	2.97619	0.887574	29.4118	6.45161	0.527241	10.2679	1.34228	19.1919	6.66667	2.47934	0	17.8571	6.15385	17.8082	8.87574	5.44218	4.54545	0	12.9032
6330418K02Rik	14.2857	2.38095	18.3432	10.9804	8.87097	10.8963	7.36607	2.01342	19.1919	20.8889	2.47934	1.63934	13.5714	0	7.30594	5.91716	4.08163	0.909091	2.58621	3.22581
6330439K17Rik	0	0.595238	0	0	0	0.175747	0	0	0	0	0	0	0	0	0	0	0	0	0	0
6330503K22Rik	9.18367	0.595238	14.7929	10.9804	0	0.175747	1.11607	0	13.1313	16	25.6198	4.91803	16.4286	4.61538	0.456621	26.0355	43.5374	1.81818	4.31034	0
6330512M04Rik	0	0.595238	0	0	0	0	0	0	0	0	0	0	0	0	0	0	0.680272	0	0	0
6330527O06Rik	0	0	0	0	0	0	0	0	0	0	0	0	0	0	0	0	0	0	0	0
6330545A04Rik	0	0	0.295858	0.784314	0	0	0	0	0	0.444444	0	0	1.42857	0	0.456621	1.18343	1.36054	0	0	0
6330549D23Rik	0	1.19048	0.295858	0.392157	0	0	0.669643	0	1.0101	2.22222	2.47934	0	0.714286	0	0	5.91716	2.04082	0	0	0
6330578E17Rik	43.8776	10.7143	27.8107	49.0196	12.9032	13.181	25	6.04027	38.3838	56	14.0496	14.7541	40.7143	9.23077	31.9635	26.0355	26.5306	17.2727	0.862069	22.5806
6430411K18Rik	0	0	0	0	0	0	0	0	0	0	0	0	0	0	0	0	0	0	0	0
6430527G18Rik	13.2653	31.5476	0.887574	4.31373	0	0.351494	8.25893	0	5.05051	4	12.3967	6.55738	8.57143	15.3846	6.39269	11.2426	0	13.6364	0	19.3548
6430531B16Rik	0	0	2.07101	0.784314	1.6129	1.93322	0.446429	0	0	0.444444	0	0	0	0	0.456621	0	0	0	0	0
6430548G04	0	0	0	0	0	0	0	0	0	0	0	0	0	0	0	0	0	0	0	0
6430548M08Rik	8.16327	0	33.432	14.1176	29.8387	33.0404	21.6518	4.02685	22.2222	2.22222	0	1.63934	1.42857	0	1.36986	2.95858	2.04082	4.54545	0.862069	6.45161
6430550D23Rik	0	0	0	0	0	0.175747	0	0	0	1.33333	0	0	1.42857	0	0	1.18343	2.04082	0	0	0
6430562O15Rik	0	0	0	0	0	0	0	0	0	0	0	0	0	0	0	0	0	0	0	0
6430571L13Rik	0	0	0	0	0	0	0	0	0	0.444444	0	0	0	0	0	0.591716	0	0	0	0
6430573F11Rik	0	0	0	0	0	0	0	0	0	0	0	0	0	0	0	0	0	0	0	0
6430584L05	0	0	0	0	0	0	0	0	0	0	0	0	0	0	0	0	0	0	0	0
6430598A04Rik	1.02041	0	0.295858	0.784314	0	0	0	0	2.0202	0	0	0	0	0	0	0	1.36054	0	0	0
6430704M03Rik	0	0	0	0	0	0	0	0	0	0	0	0	0	0	0	0	0	0	0	0
6430706D22Rik	0	0	1.18343	1.56863	0	0.702988	0.446429	0	2.0202	2.66667	1.65289	0	0.714286	1.53846	0	2.36686	0	0	0	0
6530401N04Rik	23.4694	4.16667	10.355	28.2353	0	2.6362	9.15179	2.01342	14.1414	47.5556	9.91736	19.6721	29.2857	7.69231	10.5023	19.5266	19.7279	5.45455	7.75862	22.5806
6530402F18Rik	5.10204	0.595238	13.6095	7.05882	5.64516	6.50264	3.79464	1.34228	8.08081	12.4444	0.826446	11.4754	5.71429	7.69231	2.28311	5.91716	0	0.909091	0	0
6530411M01Rik	0	0	0	0	0	0	0	0	0	0	0	0	0	0	0	0	0	0	0	0
6530418L21Rik	0	0	0	0.392157	0	0	0.223214	0	0	0	0	1.63934	0.714286	0	0	0	0	0	0	0
6530439I21	0	0	0.295858	0	0	0	0	0	0	0	0	0	0	0	0	0	0	0	0	0
6720401G13Rik	1.02041	0	0	1.56863	0	0	0.446429	0	1.0101	4	0	0	4.28571	0	1.82648	1.18343	0.680272	0	0	0
6720456B07Rik	98.9796	68.4524	92.0118	97.2549	67.7419	69.42	95.5357	38.255	98.9899	96.8889	90.9091	93.4426	94.2857	83.0769	86.3014	91.716	72.7891	59.0909	39.6552	67.7419
6720456H20Rik	7.14286	3.57143	11.2426	9.01961	3.22581	1.40598	6.47321	1.34228	14.1414	33.3333	4.13223	4.91803	17.1429	0	10.5023	10.0592	6.12245	2.72727	0	3.22581
6720463M24Rik	8.16327	1.19048	9.76331	4.31373	0	0	0	0	18.1818	16	18.1818	3.27869	5.71429	1.53846	0.456621	14.2012	13.6054	0	0.862069	3.22581
6720468P15Rik	0	0	0	1.17647	0	0	0.446429	0	0	0.444444	0	0	0.714286	1.53846	0.913242	0.591716	0	0	0	0
6720483E21Rik	0	0	0	0	0	0	0	0	0	0	0	0	0	0	0	0	0	0	0	0
6720489N17Rik	6.12245	0	3.84615	11.7647	0	0	0.669643	0	9.09091	10.6667	9.09091	3.27869	5	1.53846	1.82648	6.50888	4.7619	0.909091	0	3.22581
6820408C15Rik	0	0	0	0.392157	0	0	0	0	0	0	0	0	1.42857	0	0	0	0.680272	0	0	0
6820431F20Rik	42.8571	29.7619	36.3905	53.7255	10.4839	17.0475	35.9375	5.36913	43.4343	73.3333	48.7603	36.0656	73.5714	38.4615	47.4886	52.6627	31.9728	39.0909	0.862069	35.4839
7420426K07Rik	0	0	0	0	0	0	0	0	0	0	0	0	0	0	0	0	0	0	0	0
7420461P10Rik	0	0	0	0	0	0	0	0	0	0	0	0	0	0	0	0	0	0	0	0
7420700N18Rik	0	0	0	0	0	0	0	0	0	0	0	0	0	0	0	0	0	0	0	0
7420701I03Rik	0	0	0	0	0	0	0	0	0	0	0	0	0	0	0	0	0	0	0	0
7530416G11Rik	0	0	0	0	0	0	0	0	0	0	0	0	0	0	0	0	0	0	0	0
7530420F21Rik	0	0	0	0	0	0	0	0	0	0	0	0	0	0	0	0	0	0	0	0
7630403G23Rik	0	0	0	0	0	0	0	0	0	0	0	0	0	0	0	0	0	0	0	0
8030411F24Rik	0	0	0	0	0	0	0	0	0	0	0	0	0	0	0	0	0	0	0	0
8030423F21Rik	0	0	0	0	0	0	0	0	0	0	0	0	0	0	0	0.591716	0	0	0	0
8030423J24Rik	0	0	0	0	0	0	0	0	0	0	0	0	0	0	0	0	0	0	0	0
8030442B05Rik	0	0	0	0	0	0	0	0	0	0	0	0	0	0	0	0	0	0	0	0
8030443G20Rik	0	0	0	0	0	0	0	0	0	0	0	0	0	0	0	0	0	0	0	0
8030462N17Rik	1.02041	2.38095	0.887574	2.7451	0	0.527241	1.11607	0	4.0404	1.33333	0.826446	0	2.85714	1.53846	1.36986	6.50888	7.48299	0.909091	0	0
8430403D17Rik	0	0	0.295858	0	0	0	0	0	0	0	0	0	0	0	0	0.591716	1.36054	0	0.862069	0
8430406I07Rik	11.2245	4.7619	11.2426	17.2549	0.806452	0.175747	6.69643	0	16.1616	33.7778	5.78512	9.83607	25	3.07692	1.82648	10.6509	12.2449	3.63636	0	0
8430408G22Rik	0	0	0	0.784314	0	0	0	0	0	0	0	0	5	0	0	0	0	0	0	0
8430410A17Rik	15.3061	8.33333	17.7515	13.3333	2.41935	2.81195	2.67857	0	11.1111	29.7778	33.0579	21.3115	27.1429	15.3846	5.47945	33.1361	22.449	6.36364	0	19.3548
8430410K20Rik	14.2857	2.38095	3.84615	14.1176	1.6129	2.9877	4.46429	0.671141	5.05051	16	2.47934	16.3934	20	10.7692	5.47945	7.69231	4.08163	3.63636	0	6.45161
8430419L09Rik	6.12245	2.38095	0.295858	3.13725	0	0	1.33929	4.02685	0	4	0	4.91803	5.71429	3.07692	7.76256	2.36686	43.5374	0.909091	23.2759	0
8430422H06Rik	0	0	0	0	0	0	0	0	0	0	0	0	0	0	0	0	0	0	0	0
8430423G03Rik	0	0	0	0.784314	0	0	0	0	0	0.444444	0	0	0.714286	4.61538	0	5.32544	0	0	0	0
8430427H17Rik	3.06122	0.595238	0	0.784314	0	0.527241	0.669643	0	1.0101	1.33333	0	1.63934	5.71429	3.07692	0.456621	0.591716	1.36054	0	0.862069	0
8430429K09Rik	2.04082	0	2.66272	5.88235	1.6129	2.10896	2.00893	0.671141	4.0404	11.1111	4.95868	1.63934	5.71429	6.15385	2.73973	4.73373	6.80272	1.81818	0	3.22581
8430431K14Rik	0	0	0	0	0	0	0	0	0	0	0	0	4.28571	0	0	0	0	0	0	0
8430436N08Rik	0	0	0	0	0	0	0	0	0	0	0	0	0	0	0	0	0	0	0	0
8430437L04Rik	0	0	0	0	0	0	0	0	0	0	0	0	0	0	0	0	0	0	0	0
9030025P20Rik	1.02041	2.38095	0.887574	3.13725	0	1.58172	1.5625	0	4.0404	4.44444	2.47934	1.63934	4.28571	1.53846	0.913242	2.95858	2.72109	0.909091	0.862069	3.22581
9030204H09Rik	0	0.595238	0	0	0	0	0	0	0	0	0	0	2.14286	0	0	1.18343	0.680272	0	0	0
9030224M15Rik	0	0	0	0	0	0	0	0	0	0	0	0	0.714286	0	0	0	0	0	0	0
9030404E10Rik	0	0	0	1.17647	0	0	0	0	1.0101	0	0.826446	0	0	1.53846	0	0	0	0	0	0
9030418K01Rik	1.02041	0	4.14201	3.92157	3.22581	2.46046	2.45536	0	2.0202	8	0	3.27869	5	0	1.36986	0	0	0.909091	0	3.22581
9030425E11Rik	0	0	0	7.84314	0	0.351494	3.34821	0.671141	9.09091	4	0	0	0.714286	0	0.456621	0.591716	0	0	0	0
9030612E09Rik	0	0	0	0.392157	0	0	0	0	0	0	0	0	0	0	0	0	0	0	0	0
9030617O03Rik	9.18367	1.19048	3.5503	25.8824	4.03226	2.28471	5.35714	0	17.1717	6.22222	0.826446	4.91803	7.85714	0	5.93607	1.18343	1.36054	0.909091	0	0
9030619P08Rik	5.10204	0	8.57988	0.784314	0	0.702988	0	1.34228	1.0101	25.3333	0	0	32.1429	0	5.93607	0	1.36054	0	0.862069	0
9030624G23Rik	1.02041	1.78571	0.887574	0.784314	0	0.351494	0.892857	0	4.0404	0.888889	1.65289	0	1.42857	0	1.36986	1.18343	0.680272	0	0	0
9030624J02Rik	23.4694	10.119	20.1183	32.9412	6.45161	6.15114	14.5089	1.34228	38.3838	45.3333	19.0083	11.4754	23.5714	20	9.13242	24.2604	23.8095	9.09091	3.44828	22.5806
9030625A04Rik	13.2653	0.595238	0.591716	5.4902	0	0.175747	3.79464	0	3.0303	11.1111	3.30579	0	6.42857	3.07692	13.6986	2.36686	2.04082	0	0	3.22581
9130008F23Rik	2.04082	0	0	1.96078	0	0	2.00893	0	1.0101	3.11111	0	1.63934	5	0	0	0.591716	0	0	0	0
9130011E15Rik	2.04082	0.595238	1.18343	1.96078	0.806452	0.527241	1.11607	0	5.05051	5.33333	1.65289	4.91803	2.14286	1.53846	0.913242	3.5503	0.680272	0	0	3.22581
9130011J15Rik	45.9184	14.881	42.8994	67.451	27.4194	26.8893	41.9643	12.0805	63.6364	84	43.8017	57.377	59.2857	35.3846	40.6393	47.929	56.4626	23.6364	20.6897	70.9677
9130014G24Rik	0	0	0	0	0	0	0	0	0	0	0	0	0	0	0	0	0	0	0	0
9130015A21Rik	1.02041	0	0	0	0	0	0	0	0	0	0	0	0	0	0	0	0	0	0	3.22581
9130015L21Rik	0	0	0	0	0	0	0	0	0	0	0	0	0	0	0	0	0	0	0	0
9130017N09Rik	0	0	0	0	0	0	0	0	0	0	0	0	0	0	0	0	0	0	0	0
9130019O22Rik	5.10204	1.78571	0.295858	1.96078	0	0.527241	2.23214	0	3.0303	2.66667	2.47934	1.63934	2.14286	3.07692	0.456621	4.73373	0.680272	0.909091	0	0
9130019P16Rik	0	0	0	0	0	0	0	0	0	0	0	1.63934	0	0	0	0	0	0	0	0
9130023H24Rik	3.06122	1.78571	4.14201	3.52941	1.6129	1.40598	1.33929	0.671141	2.0202	12	5.78512	4.91803	5	0	2.28311	3.5503	3.40136	2.72727	1.72414	0
9130024F11Rik	0	0	0	0.784314	0	0	0.446429	0.671141	0	0	0.826446	0	1.42857	0	0	0	0	0	0	0
9130204L05Rik	0	0	0	0	0	0	0	0	0	0	0	0	0	0	0	0	0	0	0	0
9130206I24Rik	8.16327	1.78571	12.1302	17.2549	1.6129	0.878735	3.79464	0.671141	9.09091	9.77778	14.876	26.2295	17.8571	12.3077	1.36986	23.0769	21.0884	0.909091	0	3.22581
9130209A04Rik	0	0	0	0	0	0	0	0	0	0	0	0	0	0	0	0	0	0	0	0
9130221F21Rik	0	0	0	0	0	0	0	0	0	0	0	0	0	0	0	0	0	0	0	0
9130221H12Rik	1.02041	2.38095	2.66272	5.09804	0	1.40598	1.5625	0	3.0303	4.44444	1.65289	0	4.28571	3.07692	1.36986	4.73373	8.16327	0.909091	1.72414	6.45161
9130227L01Rik	0	0	0	0	0	0	0	0	0	0	0	0	0	0	0	0	0	0	0	0
9130230L23Rik	0	0	0.295858	0.392157	0	0.702988	0.223214	0.671141	1.0101	0	0	0	0.714286	0	0.913242	0	0	0	0	3.22581
9130401M01Rik	29.5918	14.881	14.7929	60	1.6129	0.527241	31.9196	2.68456	33.3333	72	7.43802	21.3115	47.8571	3.07692	13.6986	28.9941	14.966	7.27273	0.862069	16.129
9130404H23Rik	0	0	0	0	0	0	0	0	0	0	0	0	0	0	0	0	0	0	0	0
9130409I23Rik	0	0	0	0	0	0	0	0	0	0	0	0	0	0	0	0	0	0	0	0
9230009I02Rik	0	0	0	0	0	0	0	0	0	0	0	0	0	0	0	0	0	0	0	0
9230102K24Rik	0	0	0	0	0	0	0	0	0	0	0	0	0	0	0	0	0	0	0	0
9230102O04Rik	0	0	0	0	0	0	0	0	0	0	0	0	0	0	0	0	0	0	0	0
9230104L09Rik	0	0	0	0	0	0	0	0	0	0	0	0	0	0	0	0	0	0	0	0
9230105E05Rik	0	0.595238	0.295858	0	0	0.175747	0	0	1.0101	0.444444	0	1.63934	1.42857	0	0	0.591716	0	0	0	0
9230110C19Rik	0	0	0	0	0	0	0	0	0	0	0	0	0.714286	0	0	0	0.680272	0	0	0
9230110F15Rik	0	0	0	0	0	0	0	0	0	0	0	0	0	0	0	0	0	0	0	0
9230112D13Rik	0	0	0	0	0	0	0	0	0	0	0	0	0	0	0	0	0	0	0	0
9230112J17Rik	0	0	0	0	0	0	0	0.671141	0	0	0	0	1.42857	0	0	0	0	0	0	0
9230114K14Rik	7.14286	2.38095	12.1302	9.80392	0	1.05448	2.45536	0.671141	7.07071	28.4444	9.91736	0	10.7143	1.53846	2.73973	14.7929	24.4898	0	1.72414	9.67742
9230115E21Rik	0	0	0	0	0	0	0	0	0	0	0	0	0	0	0	0.591716	0	0	0	0
9230116N13Rik	2.04082	1.78571	0.887574	6.66667	0	0	1.78571	0	3.0303	3.11111	4.95868	3.27869	9.28571	0	1.82648	1.77515	7.48299	0	1.72414	0
9330020H09Rik	7.14286	7.14286	8.28402	9.80392	0.806452	4.04218	2.00893	0.671141	4.0404	25.3333	3.30579	9.83607	16.4286	4.61538	4.10959	13.6095	12.2449	1.81818	3.44828	6.45161
9330111N05Rik	0	0	0	0	0	0	0	0	0	0	0	0	0	0	0	0	0	0	0	0
9330117O12	0	0	0	0	0	0	0	0	0	0	0	0	0	0	0	0	0	0	0	0
9330133O14Rik	25.5102	5.95238	10.9467	21.9608	3.22581	5.79965	9.15179	0.671141	15.1515	28.8889	17.3554	9.83607	30.7143	10.7692	25.1142	20.7101	9.52381	9.09091	0	0
9330151L19Rik	0	3.57143	3.25444	9.41176	0	0.351494	3.79464	0	9.09091	14.6667	4.13223	1.63934	15	4.61538	3.19635	5.32544	7.48299	1.81818	0	0
9330158H04Rik	0	0	0	0.392157	0	0	0	0	0	0	0	0	0	0	0	0	0	0	0	0
9330159F19Rik	0	0	0	0	0	0	0	0	0	0	0	0	0	0	0	0	0	0	0	0
9330159M07Rik	6.12245	0	5.91716	6.66667	0.806452	0.527241	1.11607	0	6.06061	24.4444	1.65289	3.27869	4.28571	0	1.82648	2.36686	2.72109	0	0	3.22581
9330162B11Rik	0	0	0	0	0	0	0	0	0	0	0	0	0	0	0	0	0	0	0	0
9330175E14Rik	0	0	0	0.392157	0	0	0	0	0	0	0	0	0	0	0	0	0	0	0	0
9330175M20Rik	0	0	0	0	0	0	0	0	0	0	0	0	0	0	0	0	0	0	0	0
9330178D15Rik	0	0	0	0	0	0	0	0	0	0	0	0	0	0	0	0	0	0	0	0
9330179D12Rik	0	1.19048	0	0	0	0.175747	0	0	0	0	0.826446	0	0	0	0	0.591716	0	0.909091	0	3.22581
9330182L06Rik	1.02041	0	0	0.392157	0	0.175747	0	0	1.0101	0	0.826446	0	1.42857	0	0	1.18343	0	0	0	0
9330182O14Rik	0	0	0	0	0	0	0	0	0	0	0	0	0	0	0	0	0	0	0	0
9430007A20Rik	0	0	0	0	0	0	0	0	0	0	0	0	0	0	0	0	0	0	0	0
9430008C03Rik	6.12245	4.7619	3.5503	8.23529	0	0	2.23214	0	0	23.5556	6.61157	9.83607	14.2857	0	6.39269	8.87574	8.84354	4.54545	0	0
9430014N10Rik	0	0	0	0	0	0	0	0	0	0	0	0	0	0	0	0	0	0	0	0
9430015G10Rik	9.18367	2.97619	7.39645	5.4902	0.806452	0	1.11607	0	14.1414	20	12.3967	0	15.7143	3.07692	1.82648	13.0178	10.2041	0.909091	0.862069	0
9430016H08Rik	17.3469	11.3095	13.6095	33.3333	4.03226	5.44815	18.0804	0.671141	33.3333	49.3333	25.6198	24.5902	33.5714	20	10.5023	34.3195	28.5714	5.45455	3.44828	19.3548
9430018G01Rik	0	0	0	0	0	0	0	0	0	0	0	0	0	0	0	0	0	0	0	0
9430019J16Rik	0	0	0	0	0	0	0	0	0	0	0	0	0	0	0	0	0	0	0	0
9430020K01Rik	0	0	0	2.7451	0	0	0.446429	0	1.0101	3.11111	2.47934	0	6.42857	1.53846	0.456621	4.73373	2.72109	0	0	0
9430021M05Rik	0	0	0	0	0	0	0	0	0	0	0	0	0	0	0	0	0	0	0	0
9430023L20Rik	40.8163	14.881	57.3964	57.2549	29.8387	37.4341	37.0536	6.04027	60.6061	74.6667	66.9421	24.5902	37.1429	29.2308	19.1781	62.1302	27.8912	10	3.44828	19.3548
9430031J16Rik	0	0.595238	0	0.392157	0	0	0	0	0	0	0	0	0	0	0	0	0	0	0	0
9430032N09Rik	0	0	0	0	0	0	0	0	0	0	0	0	0	0	0	0	0	0	0	0
9430037G07Rik	2.04082	0	1.47929	1.96078	0	0.175747	0.446429	0	2.0202	10.6667	0	1.63934	1.42857	0	0.456621	0	0.680272	0	0	0
9430038I01Rik	27.551	5.95238	12.1302	41.5686	0	3.33919	20.3125	0	40.404	42.6667	11.5702	1.63934	16.4286	10.7692	10.9589	24.2604	11.5646	10	1.72414	6.45161
9430041J12Rik	0	0	0	0	0	0	0	0	0	0	0	0	0	0	0	0	0	0	0	0
9430060I03Rik	11.2245	2.38095	8.28402	7.05882	4.03226	6.32689	4.01786	0	3.0303	10.2222	8.26446	8.19672	5	6.15385	1.36986	7.10059	1.36054	1.81818	0	9.67742
9430069I07Rik	0	0	0.295858	8.62745	0	0	0	0	4.0404	8.88889	0	0	0	0	0.456621	0	0	0.909091	0	16.129
9430076C15Rik	0	0	0.295858	0	0	0	0	0	0	0	0	0	0	0	0	0	0	0	0	0
9430076G02Rik	1.02041	0	0	0	0	0.351494	0	4.02685	0	0.444444	0	0	0	0	0	0	42.1769	0	19.8276	0
9430083A17Rik	3.06122	1.19048	0	3.13725	0	0	0.446429	0	0	2.22222	5.78512	1.63934	1.42857	0	8.6758	0.591716	0.680272	0	0	9.67742
9430091E24Rik	1.02041	1.78571	0.295858	0.784314	0	0	1.11607	0.671141	1.0101	1.33333	2.47934	0	2.85714	6.15385	1.36986	3.5503	0	3.63636	0	3.22581
9530002B09Rik	0	0	0	0	0	0	0	0	0	0	0	0	0	0	0	0	0	0	0	0
9530003J23Rik	0	0	0	0	0	0	0	0	0	0	0	0	0	0	0	0	0	0	0	0
9530008L14Rik	0	0.595238	15.9763	0.392157	1.6129	11.0721	0	0.671141	0	3.11111	0	0	0	0	1.36986	0	0	0.909091	0	0
9530026F06Rik	0	0	0	0	0	0	0	2.01342	0	0	0	0	0	0	0	0	1.36054	0	3.44828	0
9530026P05Rik	0	0	0	0	0	0	0	0	0	0	0	0	0	0	0	0	0	0	0	0
9530027J09Rik	0	0	0	0	0	0	0	0	0	0	0	0	0	0	0	0.591716	1.36054	0	0	0
9530036O11Rik	0	0	0	0	0	0	0	0	0	0	0	0	0	0	0	0	0	0	0	0
9530048J24Rik	0	0	0	0	0	0	0	0	0	0	0	0	0	0	0	0	0.680272	0	0.862069	0
9530051G07Rik	0	0	0	0	0	0	0	0	0	0	0	0	0	0	0	0	0	0	0	0
9530052E02Rik	0	0	0	0	0	0	0	0	0	0	0	0	0	0	0	0	0	0	0	0
9530053A07Rik	0	0	0	0	0	0	0	0	0	0	0	0	0	0	0	0	0	0	0	0
9530059O14Rik	0	0	0	0	0	0	0	0	0	0	0	0	0	0	0	0	0	0	0	0
9530068E07Rik	46.9388	19.6429	60.6509	65.098	42.7419	37.0826	37.7232	4.02685	56.5657	85.3333	29.7521	24.5902	52.8571	16.9231	30.137	40.8284	29.932	16.3636	5.17241	25.8065
9530077C05Rik	2.04082	0	14.2012	3.13725	1.6129	7.90861	1.5625	2.01342	2.0202	5.33333	19.8347	1.63934	3.57143	7.69231	1.36986	30.1775	14.966	1.81818	0	0
9530080O11Rik	0	0	0	0.392157	0	0.175747	0	0	0	0	0	0	0.714286	0	0	0.591716	0	0	0	3.22581
9530082P21Rik	0	0	0	0.784314	0	0	0.223214	0	1.0101	0	0	0	0.714286	1.53846	0	0	0.680272	0.909091	0	0
9530091C08Rik	0	0	0	0	0	0	0	0	0	0	0	0	0	0	0	0	0	0	0	0
9630013A20Rik	0	0	0	0	0	0	0	0	0	0	0	0	0	0	0	0	0	0	0	0
9630028B13Rik	0	0	0	0	0	0	0	0	0	0	0.826446	0	0	0	0	0	0	0	0	0
9630028H03Rik	0	0	0	0	0	0	0	0	0	0	0	0	0	0	0	0	0	0	0	0
9630033F20Rik	4.08163	1.78571	3.84615	11.7647	0.806452	1.23023	2.00893	0.671141	6.06061	19.5556	2.47934	0	2.85714	0	2.73973	5.91716	0	1.81818	0	0
9830001H06Rik	10.2041	0	0.295858	5.88235	0	0.175747	1.5625	0.671141	3.0303	4.44444	7.43802	1.63934	15	0	18.2648	5.91716	4.7619	0.909091	0	0
9830107B12Rik	1.02041	0.595238	31.0651	2.35294	34.6774	21.7926	3.79464	1.34228	3.0303	11.5556	0.826446	0	1.42857	0	0.913242	0.591716	0.680272	3.63636	2.58621	0
9830132P13	1.02041	0	0	0	0	0	0	0.671141	0	0	0	0	0	0	0	0	4.08163	0	4.31034	0
9830147E19Rik	2.04082	0.595238	0	0.392157	0	0	0	0	0	7.11111	0	0	7.85714	4.61538	0	1.77515	3.40136	0	0	0
9830166K06Rik	0	0	16.8639	0	4.03226	11.5993	0.446429	2.01342	0	0.888889	0	4.91803	0.714286	0	0	0.591716	0	0.909091	0	0
9930005F22Rik	0	0.595238	0	0	0	0	0	0	1.0101	0	0	0	0	0	0	0	0	0	0	0
9930012K11Rik	3.06122	2.97619	7.69231	1.17647	0	1.05448	0	0	0	5.33333	0.826446	0	8.57143	7.69231	0.456621	3.5503	0.680272	1.81818	0	0
9930013L23Rik	0	0	0	0	0	0	0	0	0	0	0	0	0	0	0	0	0	0	0	0
9930014A18Rik	0	0.595238	0.887574	2.7451	0	0	0.223214	0	1.0101	9.33333	0	0	8.57143	0	0.456621	1.18343	0.680272	0.909091	0	3.22581
9930021D14Rik	0	0	0	0.392157	0	0	0	0	0	0.888889	0.826446	0	0	0	0	0	0	0	0	0
9930021J03Rik	22.449	10.7143	12.1302	16.4706	5.64516	5.6239	14.0625	2.68456	20.202	24.4444	26.4463	11.4754	29.2857	18.4615	13.6986	24.2604	12.9252	7.27273	2.58621	6.45161
9930023K05Rik	0	0	0	0	0	0.175747	0	0	0	0	0	0	0	0	0	0	0	0	0	0
9930104L06Rik	2.04082	0	2.07101	2.35294	0.806452	0.351494	0.892857	1.34228	0	6.66667	0.826446	0	5.71429	1.53846	2.73973	4.73373	4.7619	0.909091	0	3.22581
9930111J21Rik1	13.2653	5.35714	1.47929	4.70588	0.806452	1.40598	9.15179	0	19.1919	0.888889	0.826446	0	2.14286	0	10.5023	1.18343	0.680272	10	0	6.45161
9930111J21Rik2	3.06122	0	0.295858	2.7451	0.806452	1.23023	1.78571	0	4.0404	2.22222	0	0	3.57143	0	2.28311	1.18343	0	1.81818	0	3.22581
a	0	0	0.295858	1.17647	0.806452	0	0	0	0	2.66667	0	0	0.714286	0	1.36986	0	0	0.909091	0	29.0323
A030009H04Rik	23.4694	2.38095	2.36686	17.6471	0	0	1.11607	0.671141	9.09091	11.5556	7.43802	3.27869	22.8571	0	5.93607	14.2012	4.7619	1.81818	0	3.22581
A130010J15Rik	7.14286	2.38095	5.02959	9.41176	1.6129	0.527241	3.57143	0.671141	10.101	24.4444	9.09091	9.83607	15	1.53846	5.93607	7.69231	2.72109	3.63636	0.862069	35.4839
A130022J15Rik	3.06122	0.595238	0.887574	0.784314	0	0	0.223214	0	2.0202	0.444444	0	1.63934	1.42857	0	0	1.18343	1.36054	0	0	9.67742
A130040M12Rik	39.7959	34.5238	26.6272	14.5098	40.3226	23.5501	12.5	1.34228	14.1414	28.8889	14.0496	67.2131	22.8571	13.8462	53.4247	14.7929	10.8844	13.6364	1.72414	16.129
A130049A11Rik	3.06122	0	1.18343	2.35294	0	0.175747	0.669643	0	1.0101	1.77778	7.43802	1.63934	3.57143	0	0	6.50888	8.16327	0	0	0
A130077B15Rik	0	1.19048	0	3.92157	0	0.175747	3.125	0	4.0404	1.33333	0	0	0	0	0	0	0.680272	0	0	0
A1bg	0	0	0	0	0	0	0	0	0	0	0	0	0	0	0	0	0	0	0	0
A1cf	0	0	0	0	0	0	0	0	0	0	0	0	0	1.53846	0	0	0	0	0	0
A230001M10Rik	0	0	0	0	0	0	0	0	0	0	0	0	0	0	0	0	0	0	0	0
A230020J21Rik	0	0.595238	0	0	0	0	0.223214	0	0	0.444444	0	0	0	0	0	0	0.680272	0	0	0
A230028O05Rik	0	0	0	0.392157	0	0	0	0	0	0	0	0	0	0	0	0	0	0	0	0
A230046K03Rik	40.8163	16.0714	12.7219	41.9608	10.4839	11.9508	27.0089	3.3557	49.4949	33.7778	36.3636	8.19672	40.7143	33.8462	33.3333	36.6864	12.9252	20.9091	1.72414	19.3548
A230050P20Rik	2.04082	4.7619	0.591716	2.35294	0	0.175747	0.892857	0	1.0101	16	4.13223	4.91803	17.1429	4.61538	1.82648	12.426	3.40136	9.09091	0	6.45161
A230051G13Rik	3.06122	2.38095	1.47929	5.09804	0	0.702988	2.90179	4.02685	3.0303	9.33333	2.47934	4.91803	11.4286	3.07692	1.82648	8.28402	36.0544	2.72727	18.9655	9.67742
A230056J06Rik	0	0	0	0	0	0	0.223214	0	0	0	1.65289	0	0	0	0	0	0	0	0	0
A230056P14Rik	1.02041	0	0	0.392157	0	0	0.223214	0	1.0101	0.888889	0.826446	1.63934	1.42857	3.07692	0.913242	0	0	0	0	0
A230057D06Rik	0	0	0	0	0	0	0	0	0	0	0	0	0	0	0	0	0	0	0	0
A230065H16Rik	0	0.595238	0	0	0	0	0	0	0	0	0	0	0	0	0	0	0	0	0	0
A230070E04Rik	0	0	0	0	0	0	0	0	0	0	0	0	0	0	0	0	0	0	0	0
A230072C01Rik	3.06122	1.19048	3.25444	6.66667	0	0.527241	1.78571	0.671141	2.0202	8	4.95868	4.91803	8.57143	1.53846	5.93607	8.28402	8.16327	1.81818	0.862069	3.22581
A230072E10Rik	0	0	0	0.392157	0	0	0	0	0	0.444444	0	0	1.42857	0	0.913242	0	0	0	0	3.22581
A230073K19Rik	0	0	0	0	0	0	0	0	0	0	0	0	0	0	0.456621	0	0	0	0	0
A230077H06Rik	0	0	0	0	0	0	0	0	0	0	0	0	0	0	0	0	0	0	0	0
A230108P19Rik	0	0	0	0	0	0	0	0	0	0	0	0	0	0	0	0	0	0	0	0
A2ld1	1.02041	5.35714	0.295858	1.56863	0	0	0.446429	0	1.0101	2.66667	1.65289	0	10	1.53846	4.10959	4.73373	6.80272	0.909091	0	16.129
A2m	0	0	0	0	0	0.175747	0	0	0	0	0	0	0	0	0	0	0	0	0	0
A330009N23Rik	2.04082	0	0	0.392157	0	0	0.223214	0	0	0.444444	0	0	2.14286	0	0.456621	1.18343	0	0	0	0
A330021E22Rik	0	0	0	0	0	0	0	0	0	0	0	0	0	0	0	0	0	0	0	0
A330023F24Rik	0	0	0.295858	0.392157	0	0.878735	0	0	0	0.444444	0	0	0	1.53846	0	0	0	0	0	0
A330032B11Rik	0	0	0	0	0	0	0	0	0	0	0	0	0	0	0	0	0	0	0	0
A330035P11Rik	2.04082	0	0.591716	2.35294	0	0	1.33929	0	1.0101	4	1.65289	1.63934	1.42857	1.53846	3.19635	2.95858	1.36054	0	0	9.67742
A330040F15Rik	1.02041	0.595238	2.36686	3.92157	0.806452	0.527241	1.5625	0.671141	2.0202	4.88889	1.65289	3.27869	2.85714	0	0	2.36686	4.7619	1.81818	0	0
A330041J22Rik	0	0	0	0	0	0	0	0	0	0	0	0	0	0	0	0	0	0	0	0
A330048O09Rik	0	0	0	0	0	0	0	0	0	0	0	0	0	0	0	0	0	0	0	0
A330049M08Rik	0	0	0	0	0	0	0	0	0	0	0	0	0.714286	0	0	0	0	0	0	0
A330049N07Rik	0	0	0	0	0	0	0	0	0	0	0	0	0	0	0	0	0	0	0	0
A330050B17Rik	0	0	0	0	0	0	0.446429	0	0	0.888889	0	0	0	0	0	0	0	0.909091	0	0
A330050F15Rik	0	0	0	0	0	0	0	0	0	0	0	0	0	0	0	0	0	0	0	0
A330069E16Rik	2.04082	2.38095	3.84615	3.92157	0.806452	1.75747	2.45536	0	8.08081	4	4.95868	3.27869	7.85714	3.07692	1.36986	4.73373	1.36054	0.909091	0	0
A330070K13Rik	0	0	0	0	0	0	0	0	0	0	0	0	0	0	0	0	0	0	0	0
A330076C08Rik	0	0	0	0	0	0	0	0	0	0	0	0	0	0	0	0	0	0	0	0
A330076H08Rik	0	0	0	0	0	0	0	0	0	0	0	0	0	0	0	0	0	0	0	0
A330093E20Rik	0	0	0	0	0	0	0	0	0	0	0	0	0	0	0	0	0	0	0	0
A330102I10Rik	0	0	0	0	0	0	0	0	0	0	0	0	0	0	0	0	0	0	0	0
A3galt2	0	0	0	0	0	0	0	0	0	0	0	0	0	0	0	0.591716	0	0	0	6.45161
A430005L14Rik	38.7755	15.4762	49.1124	69.8039	1.6129	3.86643	19.1964	0.671141	49.4949	76.8889	32.2314	29.5082	50	6.15385	25.1142	24.2604	65.9864	9.09091	0	25.8065
A430033K04Rik	1.02041	0.595238	1.18343	1.96078	0	0.351494	0.669643	0	3.0303	4.44444	2.47934	3.27869	5.71429	1.53846	3.19635	1.77515	3.40136	0	0	0
A430035B10Rik	22.449	1.19048	3.5503	7.45098	1.6129	2.46046	4.46429	0.671141	6.06061	4.88889	31.405	1.63934	7.85714	7.69231	45.6621	24.2604	8.16327	12.7273	2.58621	32.2581
A430071A18Rik	0	0	0	0.392157	0	0	0.223214	0	0	0	0	0	0	0	0	0	0	0	0	0
A430078G23Rik	7.14286	5.35714	2.36686	4.70588	1.6129	1.05448	2.67857	0.671141	9.09091	7.55556	11.5702	6.55738	7.14286	0	1.82648	7.10059	0.680272	9.09091	0	0
A430084P05Rik	7.14286	3.57143	0.591716	1.96078	1.6129	0	5.80357	0.671141	1.0101	0	1.65289	0	1.42857	1.53846	65.7534	4.14201	2.04082	6.36364	0	16.129
A430088P11Rik	0	8.33333	0.591716	0	0.806452	0.175747	0.223214	0	0	0.444444	0	0	2.85714	1.53846	0	2.36686	0	0	0	3.22581
A430089I19Rik	0	0	0	0	0	0	0	0	0	0	0	0	0	0	0	0	0	0	0	0
A430090L17Rik	1.02041	0	0	0	0	0	0	0	0	0	0	0	0	0	0	0	0	0	0	0
A430092G05Rik	0	0	0	0	0	0	0	0	1.0101	0	0	0	0	0	0	0	0	0	0	0
A430093F15Rik	0	5.95238	0.591716	0.784314	0.806452	0	1.11607	0	7.07071	0	0.826446	0	0	1.53846	0	0	0	2.72727	0	0
A430105I19Rik	1.02041	0	0	0	0	0	0.223214	0	0	0.444444	0	0	0.714286	4.61538	0	0	2.04082	0	0	0
A430107O13Rik	0	0	0	0.392157	0	0.351494	1.11607	0.671141	4.0404	0.444444	0	0	2.14286	0	0	0.591716	0	0	0	3.22581
A430107P09Rik	0	3.57143	0	0	0	0	0	0	0	0	0	0	0	0	0	0	0	0	0	0
A430110N23Rik	0	0	0.295858	0	0	0	0	0	0	0	0	0	0	0	0	0	0	0	0	0
A4galt	0	0	0	0	0	0	0	0	0	0	0	0	0	0	0	0	0	0.909091	0	6.45161
A4gnt	0	0	0	0	0	0	0	0	0	0	0	0	0	0	0	0	0	0	0	0
A530006G24Rik	0	0	0	0	0	0	0	0	0	0	0	0	0	0	0	0	0	0	0	0
A530013C23Rik	0	0	0	0.784314	0	0	2.00893	0	1.0101	0	0	0	0	0	0	0	0	0	0.862069	0
A530016L24Rik	0	0	0	0	0	0	0	0	0	0	0	0	0	0	0	0	0	0	0	0
A530032D15Rik	14.2857	1.19048	15.6805	7.84314	7.25806	9.49033	10.4911	0	5.05051	16.4444	4.95868	0	3.57143	0	21.0046	1.77515	0	20	0	51.6129
A530046M15	0	0	0.295858	0	0	0	0	0	0	0	0	0	0	0	0	0	0	0	0	0
A530050N04Rik	0	0	0	0	0	0	0.223214	0	0	0	0	0	0	0	0	0	0	0	0	0
A530053G22Rik	0	0	0	0	0	0	0	0	0	0	0	0	0	0	0	0	0	0	0	0
A530054K11Rik	4.08163	2.97619	9.76331	13.3333	2.41935	4.04218	7.8125	0.671141	11.1111	15.1111	10.7438	9.83607	13.5714	4.61538	5.93607	10.0592	3.40136	5.45455	0.862069	12.9032
A530058N18Rik	0	0	0	0	0	0	0	0	0	0	0	0	0	0	0	0	0	0	0	0
A530064D06Rik	10.2041	1.78571	14.497	11.3725	29.8387	11.775	13.1696	1.34228	22.2222	5.33333	1.65289	1.63934	2.14286	0	12.3288	1.77515	0	0.909091	0.862069	0
A530065N20	0	0	0	0	0	0	0	0	0	0	0	0	0	0	0	0	0	0	0	0
A530072M11Rik	0	0.595238	0	0.392157	0	0	0.223214	0	0	0	0.826446	0	0	0	0	0	0	0	0	6.45161
A530088E08Rik	0	3.57143	2.07101	3.92157	0.806452	0.702988	2.00893	0	2.0202	2.22222	4.13223	6.55738	5	10.7692	5.47945	7.69231	0	5.45455	0	0
A530098C11Rik	0	0	0	0	0	0	0	0	0	0.444444	0	0	0	0	0	0	0	0	0	0
A530099J19Rik	4.08163	0	0	0	0	0	0	0	1.0101	0	0	0	0	0	0	0	0	0	0	0
A630001G21Rik	12.2449	10.7143	20.1183	31.7647	3.22581	8.26011	10.9375	4.69799	21.2121	48.8889	47.1074	9.83607	22.8571	38.4615	6.39269	42.6036	4.7619	30.9091	0	22.5806
A630007B06Rik	14.2857	3.57143	17.1598	18.0392	5.64516	7.55712	12.5	2.68456	25.2525	16.8889	21.4876	11.4754	19.2857	13.8462	11.8721	19.5266	20.4082	3.63636	14.6552	25.8065
A630010A05Rik	0	0	0	0	0	0	0	0	0	0	0	0	0	0	0	0	0	0	0	0
A630012P03Rik	0	0	0	0	0	0	0.223214	0	0	0	0	0	0	0	0	0	0	0	0	0
A630019I02Rik	0	0	0	0	0	0	0	0	0	0	0	0	0	0	0.913242	0	0	0.909091	0	0
A630020A06	0	0	0	0	0	0	0	0	0	0	0	0	0	0	0	0	0	0	0	0
A630023A22Rik	0	0	0	0	0	0	0	0	0	0	0	0	0	0	0	0	0	0	0	0
A630033H20Rik	8.16327	1.78571	1.47929	5.4902	0.806452	0.175747	8.70536	1.34228	6.06061	0.888889	14.876	0	1.42857	6.15385	4.56621	8.87574	0.680272	9.09091	0	0
A630055G03Rik	19.3878	6.54762	35.7988	36.4706	0	0.878735	0.892857	1.34228	28.2828	54.2222	57.8512	9.83607	31.4286	7.69231	0.456621	45.5621	23.8095	1.81818	0	3.22581
A630066F11Rik	5.10204	2.38095	8.28402	4.31373	1.6129	4.92091	2.23214	0.671141	5.05051	11.1111	4.95868	21.3115	5.71429	0	5.02283	4.73373	4.7619	1.81818	2.58621	0
A630072M18Rik	12.2449	8.92857	8.57988	15.6863	4.03226	2.9877	4.6875	0.671141	6.06061	33.3333	12.3967	13.1148	25.7143	21.5385	16.895	16.568	15.6463	5.45455	6.03448	9.67742
A630073D07Rik	0	0	0	0	0	0	0	0	0	0	0	0	0	0	0	0	0	0	0	0
A630075F10Rik	0	0	0	0	0	0	0	0	0	0	0	0	0	0	0	0	0	0	0	0
A630076J17Rik	1.02041	0	0	0	0	0	0	0	0	0	0	0	0	0	0.456621	0	0	0	0	0
A630077J23Rik	0	0	0	0	0	0	0	0	0	0	0	0	0	0	0	0	0	0	0	0
A630089N07Rik	1.02041	1.19048	2.95858	10.1961	0	0	1.78571	0.671141	1.0101	18.6667	7.43802	4.91803	12.1429	0	2.28311	13.0178	11.5646	2.72727	0	0
A630095E13Rik	0	0	0	0	0	0	0	0	0	0	0	0	0	0	0	0	0	0	0	0
A630095N17Rik	0	0	0	0	0	0	0	0	0	0	0	0	1.42857	0	1.82648	0	0	0	0	0
A730008H23Rik	1.02041	1.19048	0.887574	0.784314	0.806452	0.175747	0.223214	0	0	0.444444	0	0	0.714286	0	0.913242	0.591716	0.680272	0	0	0
[truncated: 21,435 more rows]

## Sheet: Lung
Supplementary File 10B. The percentage of cells that express a gene per cell type in lung.
Gene symbol	classical monocyte	alveolar macrophage	B cell	lymphocyte	capillary endothelial cell	pulmonary artery endothelial cell	fibroblast	non-classical monocyte	fibroblast	neutrophil	myofibroblast cell	ciliated epithelial cell	pulmonary ionocyte; type II pneumocyte	pericyte cell
0610005C13Rik	0	0	0	0	0	0	0	0	0.746269	0	0	0	0	0
0610007C21Rik	58.427	33.0357	15.1515	22.807	62.069	47.5	62.9386	29.6875	68.6567	11.1111	52.3077	57.1429	47.4576	44
0610007L01Rik	30.3371	28.5714	12.1212	17.5439	34.4828	25.8333	21.7105	17.1875	24.6269	3.7037	12.3077	52.381	47.4576	12
0610007N19Rik	7.86517	5.35714	9.09091	1.75439	3.44828	7.5	70.8333	9.375	73.8806	7.40741	30.7692	9.52381	55.9322	24
0610007P08Rik	3.37079	4.46429	6.06061	1.16959	6.89655	0.833333	7.01754	1.5625	9.70149	0	6.15385	19.0476	8.47458	4
0610007P14Rik	32.5843	14.2857	18.1818	19.883	10.3448	20	22.3684	15.625	33.5821	3.7037	15.3846	33.3333	28.8136	8
0610007P22Rik	14.6067	7.14286	12.1212	14.0351	27.5862	10.8333	10.7456	6.25	17.1642	0	12.3077	33.3333	16.9492	4
0610008F07Rik	0	0	0	0	0	0	0	0	0	0	0	0	1.69492	0
0610009B14Rik	1.1236	0	0	0	0	0	0	0	0	0	0	9.52381	3.38983	0
0610009B22Rik	21.3483	22.3214	15.1515	2.92398	24.1379	11.6667	23.0263	4.6875	17.1642	3.7037	7.69231	57.1429	44.0678	8
0610009D07Rik	76.4045	77.6786	48.4848	56.1404	72.4138	37.5	41.0088	76.5625	58.9552	29.6296	40	90.4762	50.8475	24
0610009L18Rik	4.49438	4.46429	0	1.16959	10.3448	2.5	8.55263	3.125	6.71642	0	1.53846	23.8095	8.47458	0
0610009O20Rik	12.3596	1.78571	9.09091	4.09357	34.4828	25	15.5702	3.125	11.9403	7.40741	12.3077	28.5714	6.77966	12
0610010B08Rik	0	0	0	1.16959	0	0	0.657895	0	2.23881	0	0	0	0	0
0610010F05Rik	4.49438	8.92857	0	2.33918	6.89655	7.5	4.38596	3.125	5.97015	0	1.53846	33.3333	6.77966	4
0610010K14Rik	50.5618	33.0357	24.2424	33.3333	72.4138	39.1667	15.7895	46.875	29.1045	25.9259	16.9231	71.4286	38.9831	28
0610010O12Rik	1.1236	0	0	0.584795	0	0	0.438596	0	2.23881	0	1.53846	23.8095	10.1695	0
0610011F06Rik	14.6067	3.57143	18.1818	14.6199	13.7931	9.16667	20.8333	6.25	14.1791	0	10.7692	71.4286	33.8983	8
0610011L14Rik	12.3596	1.78571	12.1212	3.50877	17.2414	7.5	5.48246	7.8125	5.97015	0	4.61538	33.3333	13.5593	4
0610012G03Rik	58.427	55.3571	36.3636	29.8246	68.9655	38.3333	34.8684	31.25	41.791	14.8148	12.3077	80.9524	47.4576	16
0610012H03Rik	0	0	0	0	0	0	0	0	0	0	0	0	0	0
0610030E20Rik	24.7191	10.7143	18.1818	15.2047	24.1379	11.6667	17.1053	15.625	25.3731	3.7037	12.3077	28.5714	23.7288	12
0610031J06Rik	53.9326	44.6429	33.3333	38.5965	58.6207	46.6667	35.9649	28.125	36.5672	11.1111	21.5385	57.1429	42.3729	32
0610031O16Rik	0	0	0	0	0	0	0	0	0	0	0	0	0	0
0610037L13Rik	25.8427	12.5	18.1818	9.35673	31.0345	30	19.2982	7.8125	27.6119	3.7037	13.8462	52.381	23.7288	16
0610037P05Rik	17.9775	16.9643	18.1818	18.7135	27.5862	19.1667	18.2018	10.9375	21.6418	7.40741	13.8462	19.0476	23.7288	4
0610038B21Rik	0	0	0	0	0	0	0.657895	0	0	0	0	0	0	0
0610038L08Rik	0	0	0	0	0	0	0	0	0	0	0	0	0	0
0610039K10Rik	0	0	0	0	0	0	0.438596	0	0.746269	0	0	0	0	0
0610040B10Rik	1.1236	0	6.06061	0	0	0.833333	0.877193	0	0.746269	0	1.53846	0	6.77966	0
0610040F04Rik	0	0	0	0	0	0	0	0	0	0	0	0	0	0
0610040J01Rik	8.98876	1.78571	0	0	0	0	0.657895	1.5625	0	0	0	19.0476	22.0339	0
0610043K17Rik	0	0	0	1.16959	0	1.66667	1.75439	0	0.746269	0	1.53846	0	0	0
0910001L09Rik	82.0225	75.8929	30.303	46.1988	51.7241	22.5	36.1842	51.5625	38.806	44.4444	23.0769	85.7143	54.2373	16
100043387	2.24719	3.57143	3.0303	1.16959	0	5.83333	7.45614	0	5.97015	0	0	4.7619	1.69492	0
1100001G20Rik	14.6067	90.1786	0	2.92398	10.3448	3.33333	1.31579	14.0625	2.23881	62.963	1.53846	0	15.2542	0
1110001A16Rik	17.9775	17.8571	9.09091	13.4503	24.1379	20	14.4737	9.375	20.8955	7.40741	10.7692	57.1429	47.4576	4
1110001J03Rik	41.573	25	30.303	32.1637	31.0345	25	30.0439	18.75	47.0149	3.7037	38.4615	61.9048	64.4068	16
1110002B05Rik	69.6629	51.7857	54.5455	40.3509	82.7586	55.8333	49.1228	37.5	60.4478	18.5185	47.6923	95.2381	28.8136	40
1110002L01Rik	2.24719	0.892857	0	1.75439	10.3448	0.833333	1.31579	1.5625	2.23881	0	4.61538	19.0476	5.08475	0
1110002N22Rik	5.61798	5.35714	0	1.75439	6.89655	2.5	5.48246	4.6875	2.23881	0	3.07692	28.5714	3.38983	4
1110003E01Rik	78.6517	45.5357	81.8182	32.1637	79.3103	29.1667	64.4737	51.5625	77.6119	29.6296	53.8462	90.4762	74.5763	48
1110004E09Rik	10.1124	5.35714	0	7.60234	27.5862	13.3333	5.70175	3.125	6.71642	3.7037	4.61538	100	27.1186	0
1110004F10Rik	57.3034	41.0714	42.4242	35.6725	55.1724	40.8333	45.1754	37.5	47.0149	7.40741	44.6154	80.9524	45.7627	44
1110005A03Rik	61.7978	31.25	42.4242	40.3509	41.3793	25.8333	24.1228	37.5	23.1343	3.7037	13.8462	19.0476	27.1186	12
1110006O24Rik	1.1236	0.892857	0	0.584795	0	0	0.877193	1.5625	0	0	0	0	1.69492	0
1110007C09Rik	68.5393	25	6.06061	37.4269	72.4138	34.1667	17.7632	39.0625	27.6119	40.7407	24.6154	52.381	28.8136	8
1110008F13Rik	87.6404	58.9286	30.303	40.9357	89.6552	38.3333	33.5526	79.6875	47.0149	66.6667	30.7692	80.9524	57.6271	20
1110008J03Rik	6.74157	4.46429	0	1.75439	13.7931	0	2.19298	4.6875	2.98507	3.7037	0	28.5714	8.47458	16
1110008L16Rik	1.1236	3.57143	3.0303	0	6.89655	0	2.41228	0	1.49254	3.7037	0	9.52381	8.47458	0
1110008P14Rik	39.3258	55.3571	39.3939	20.4678	34.4828	17.5	13.3772	28.125	14.9254	14.8148	16.9231	42.8571	59.322	16
1110012J17Rik	1.1236	0	0	0.584795	0	4.16667	0.438596	0	0.746269	0	1.53846	33.3333	45.7627	4
1110012L19Rik	13.4831	13.3929	9.09091	9.35673	20.6897	13.3333	11.6228	1.5625	14.9254	3.7037	15.3846	23.8095	3.38983	0
1110014N23Rik	26.9663	16.9643	6.06061	6.43275	20.6897	4.16667	8.55263	10.9375	7.46269	0	9.23077	33.3333	11.8644	4
1110015O18Rik	0	0	0	0	0	0	0	0	0	0	0	0	0	0
1110017D15Rik	6.74157	2.67857	0	0	10.3448	0.833333	1.31579	0	2.23881	7.40741	1.53846	100	1.69492	0
1110017F19Rik	2.24719	1.78571	0	1.75439	0	1.66667	0.657895	3.125	1.49254	3.7037	1.53846	80.9524	83.0508	4
1110018G07Rik	5.61798	7.14286	3.0303	4.67836	13.7931	5	6.35965	6.25	6.71642	0	4.61538	4.7619	5.08475	4
1110018J18Rik	4.49438	0.892857	15.1515	5.26316	20.6897	12.5	5.04386	9.375	5.97015	0	7.69231	0	5.08475	4
1110019D14Rik	3.37079	4.46429	0	1.75439	0	0.833333	1.75439	1.5625	5.97015	11.1111	3.07692	19.0476	3.38983	0
1110020A21Rik	4.49438	0.892857	3.0303	1.75439	0	1.66667	1.31579	1.5625	1.49254	0	0	0	3.38983	0
1110020G09Rik	16.8539	7.14286	6.06061	4.67836	6.89655	3.33333	7.89474	1.5625	7.46269	3.7037	7.69231	38.0952	11.8644	8
1110021J02Rik	8.98876	14.2857	6.06061	5.84795	20.6897	8.33333	9.21053	6.25	16.4179	0	7.69231	9.52381	10.1695	0
1110021L09Rik	1.1236	0.892857	3.0303	1.16959	17.2414	2.5	6.14035	0	2.23881	7.40741	7.69231	4.7619	20.339	0
1110028C15Rik	6.74157	1.78571	0	2.33918	10.3448	5	9.64912	3.125	15.6716	0	12.3077	9.52381	15.2542	8
1110028F11Rik	0	0	0	1.75439	0	0	0.438596	0	0	0	0	0	1.69492	0
1110028F18Rik	0	0	0	0	0	0	0	0	0	0	0	0	0	0
1110031I02Rik	3.37079	6.25	0	0.584795	3.44828	5	7.01754	0	5.22388	0	4.61538	9.52381	15.2542	4
1110032A03Rik	10.1124	10.7143	9.09091	5.26316	10.3448	7.5	15.3509	6.25	14.1791	0	9.23077	90.4762	30.5085	4
1110032A04Rik	0	0	0	0	0	0	0	0	0	0	0	42.8571	0	0
1110032F04Rik	0	0	0	1.16959	0	0	0	0	0	0	0	0	0	0
1110034A24Rik	4.49438	4.46429	9.09091	4.09357	13.7931	3.33333	4.16667	3.125	0	0	4.61538	23.8095	1.69492	4
1110034B05Rik	10.1124	6.25	0	4.67836	6.89655	5.83333	7.89474	7.8125	10.4478	7.40741	6.15385	19.0476	1.69492	8
1110034G24Rik	21.3483	15.1786	0	13.4503	34.4828	22.5	12.5	12.5	12.6866	3.7037	9.23077	4.7619	18.6441	4
1110035M17Rik	0	0	0	0	3.44828	0	0.219298	0	0.746269	0	0	4.7619	0	0
1110036E04Rik	0	0	0	0	0	0	0	0	0	0	0	0	0	0
1110037F02Rik	13.4831	13.3929	9.09091	8.77193	27.5862	7.5	7.89474	10.9375	14.1791	3.7037	6.15385	14.2857	20.339	12
1110038B12Rik	24.7191	27.6786	6.06061	3.50877	6.89655	4.16667	8.11404	7.8125	12.6866	0	4.61538	4.7619	8.47458	8
1110038D17Rik	15.7303	16.9643	15.1515	3.50877	6.89655	8.33333	6.14035	18.75	8.20896	0	12.3077	14.2857	6.77966	8
1110038F14Rik	34.8315	28.5714	21.2121	16.3743	55.1724	41.6667	23.9035	28.125	26.1194	11.1111	21.5385	57.1429	32.2034	8
1110046J04Rik	1.1236	0.892857	3.0303	0	0	0.833333	10.0877	0	5.97015	3.7037	4.61538	4.7619	3.38983	8
1110049F12Rik	15.7303	18.75	12.1212	5.84795	31.0345	15.8333	11.1842	12.5	8.20896	14.8148	6.15385	28.5714	18.6441	12
1110050K14Rik	3.37079	0.892857	3.0303	0.584795	13.7931	8.33333	0.657895	0	1.49254	0	3.07692	0	0	0
1110051M20Rik	2.24719	6.25	3.0303	0	10.3448	6.66667	11.1842	1.5625	7.46269	0	7.69231	42.8571	1.69492	8
1110054M08Rik	1.1236	13.3929	6.06061	8.77193	13.7931	9.16667	12.2807	1.5625	5.22388	3.7037	1.53846	33.3333	33.8983	8
1110054O05Rik	16.8539	9.82143	9.09091	5.26316	3.44828	2.5	5.48246	7.8125	4.47761	0	3.07692	14.2857	5.08475	8
1110057K04Rik	16.8539	15.1786	3.0303	14.6199	13.7931	7.5	7.67544	15.625	8.20896	11.1111	10.7692	23.8095	16.9492	8
1110058L19Rik	21.3483	32.1429	24.2424	18.1287	27.5862	15	17.7632	14.0625	28.3582	3.7037	4.61538	76.1905	37.2881	12
1110059E24Rik	22.4719	22.3214	45.4545	7.01754	51.7241	23.3333	16.0088	15.625	17.1642	3.7037	16.9231	61.9048	13.5593	16
1110059G10Rik	32.5843	23.2143	27.2727	8.77193	24.1379	18.3333	19.2982	10.9375	19.403	3.7037	7.69231	38.0952	30.5085	12
1110059M19Rik	0	0	0	0	0	0	0	0	0	0	0	0	0	0
1110065P20Rik	6.74157	11.6071	6.06061	7.60234	10.3448	6.66667	25.6579	9.375	23.8806	3.7037	10.7692	42.8571	37.2881	16
1110067D22Rik	3.37079	4.46429	3.0303	1.16959	31.0345	12.5	22.1491	0	24.6269	7.40741	20	0	10.1695	12
1190002F15Rik	6.74157	5.35714	3.0303	7.01754	10.3448	1.66667	1.97368	3.125	4.47761	3.7037	0	0	1.69492	0
1190002H23Rik	11.236	28.5714	0	14.0351	3.44828	25	14.4737	7.8125	3.73134	14.8148	1.53846	9.52381	74.5763	88
1190002N15Rik	5.61798	13.3929	0	9.94152	6.89655	5	46.0526	12.5	15.6716	7.40741	4.61538	47.619	25.4237	84
1190003J15Rik	0	0	3.0303	0	0	0	0.219298	0	0	0	0	23.8095	40.678	0
1190003K10Rik	0	0	0	0	0	0	0	0	0	0	0	0	0	0
1190005F20Rik	13.4831	13.3929	12.1212	4.09357	13.7931	7.5	9.21053	3.125	9.70149	0	6.15385	38.0952	13.5593	8
1190005I06Rik	0	21.4286	0	0	0	0.833333	0.219298	0	1.49254	0	0	4.7619	1.69492	0
1190007F08Rik	2.24719	0	3.0303	0	0	3.33333	25.4386	3.125	28.3582	0	12.3077	19.0476	54.2373	4
1190007I07Rik	10.1124	13.3929	9.09091	8.77193	20.6897	6.66667	7.45614	7.8125	8.20896	0	7.69231	42.8571	15.2542	8
1200009I06Rik	3.37079	2.67857	0	0	3.44828	5	18.4211	0	7.46269	0	3.07692	0	1.69492	12
1200011I18Rik	15.7303	15.1786	0	8.18713	10.3448	5	6.79825	9.375	8.20896	7.40741	1.53846	23.8095	11.8644	8
1200011M11Rik	3.37079	5.35714	0	1.16959	6.89655	2.5	3.72807	4.6875	3.73134	0	1.53846	14.2857	1.69492	4
1200014J11Rik	13.4831	10.7143	0	5.84795	13.7931	5.83333	7.01754	4.6875	10.4478	3.7037	1.53846	28.5714	15.2542	4
1200016B10Rik	13.4831	7.14286	15.1515	11.6959	34.4828	10.8333	13.1579	10.9375	14.1791	7.40741	10.7692	80.9524	50.8475	0
1300001I01Rik	11.236	24.1071	6.06061	3.50877	24.1379	3.33333	3.94737	10.9375	6.71642	0	6.15385	14.2857	25.4237	4
1300002E11Rik	11.236	13.3929	21.2121	12.2807	24.1379	11.6667	13.5965	1.5625	12.6866	0	20	28.5714	15.2542	0
1300002K09Rik	0	5.35714	0	0	0	0	0	0	0	0	0	0	0	0
1300010F03Rik	1.1236	3.57143	0	2.33918	3.44828	3.33333	4.60526	3.125	2.23881	0	0	9.52381	11.8644	4
1300014I06Rik	10.1124	1.78571	15.1515	2.33918	24.1379	45	4.82456	4.6875	23.1343	0	12.3077	4.7619	15.2542	4
1300015D01Rik	0	0	0	0	0	0	0	0	0	0	0	0	0	0
1300017J02Rik	0	0	0	0	0	0	0	0	0	0	0	4.7619	0	0
1300018I17Rik	19.1011	6.25	0	2.33918	10.3448	9.16667	3.94737	14.0625	5.22388	3.7037	6.15385	4.7619	8.47458	0
1300018J18Rik	8.98876	6.25	3.0303	2.92398	6.89655	5.83333	8.77193	7.8125	1.49254	0	3.07692	14.2857	13.5593	8
1500001M20Rik	7.86517	2.67857	6.06061	3.50877	0	4.16667	1.75439	3.125	1.49254	3.7037	1.53846	4.7619	0	0
1500002O10Rik	0	0	0	0	0	0	0	0	0	0	0	0	3.38983	0
1500002O20Rik	12.3596	8.92857	6.06061	3.50877	13.7931	7.5	4.16667	6.25	7.46269	0	1.53846	14.2857	11.8644	0
1500003O03Rik	59.5506	85.7143	12.1212	18.1287	27.5862	18.3333	25.8772	37.5	41.791	22.2222	15.3846	57.1429	45.7627	20
1500004A13Rik	0	0	0	0	0	0	0.219298	0	0	0	0	0	0	0
1500009C09Rik	0	0	0	0	0	0	0	0	0	0	0	0	0	0
1500009L16Rik	2.24719	0.892857	3.0303	1.16959	6.89655	0.833333	4.16667	0	11.9403	0	10.7692	38.0952	1.69492	12
1500010J02Rik	12.3596	8.92857	0	0	0	0.833333	1.97368	1.5625	3.73134	14.8148	0	4.7619	3.38983	4
1500011B03Rik	8.98876	0.892857	12.1212	7.01754	13.7931	5	3.50877	10.9375	4.47761	0	4.61538	14.2857	6.77966	0
1500011H22Rik	7.86517	1.78571	6.06061	1.16959	13.7931	5.83333	8.99123	4.6875	8.95522	0	9.23077	90.4762	6.77966	8
1500011K16Rik	33.7079	39.2857	6.06061	7.01754	34.4828	30	24.7807	12.5	26.1194	0	13.8462	76.1905	49.1525	16
1500012F01Rik	73.0337	27.6786	51.5152	24.5614	37.931	18.3333	19.0789	40.625	26.8657	11.1111	16.9231	23.8095	54.2373	12
1500012K07Rik	0	0	0	0	0	0	0	0	0	0	0	0	0	0
1500015A07Rik	6.74157	2.67857	12.1212	2.33918	0	0	1.53509	6.25	0.746269	0	1.53846	4.7619	1.69492	0
1500015L24Rik	0	0	0	0	0	0	0.219298	0	0	0	0	0	0	0
1500015O10Rik	0	0	0	0.584795	0	0	0.877193	0	1.49254	0	24.6154	42.8571	1.69492	0
1500016L03Rik	0	0	0	0	0	0	0	0	0	0	0	0	0	0
1500017E21Rik	0	0	0	0	0	0	0.219298	0	0	0	0	0	0	0
1500031L02Rik	5.61798	4.46429	0	2.33918	10.3448	6.66667	4.16667	1.5625	11.9403	7.40741	10.7692	76.1905	10.1695	4
1500032L24Rik	89.8876	88.3929	42.4242	56.1404	79.3103	60.8333	66.4474	67.1875	75.3731	44.4444	49.2308	100	84.7458	56
1520402A15Rik	1.1236	0	3.0303	0	0	0	3.07018	0	0	0	1.53846	9.52381	3.38983	0
1600002D24Rik	0	0	0	0	0	0	0	0	0	0	0	0	0	0
1600002H07Rik	1.1236	3.57143	0	1.75439	3.44828	2.5	3.07018	0	4.47761	0	3.07692	4.7619	1.69492	0
1600002K03Rik	22.4719	9.82143	12.1212	10.5263	17.2414	8.33333	11.4035	15.625	9.70149	7.40741	9.23077	42.8571	25.4237	4
1600010M07Rik	29.2135	10.7143	3.0303	0	0	1.66667	0	28.125	0.746269	51.8519	0	0	0	0
1600012F09Rik	8.98876	8.92857	6.06061	4.09357	51.7241	14.1667	15.5702	3.125	17.1642	3.7037	10.7692	33.3333	52.5424	16
1600012H06Rik	21.3483	16.9643	0	9.94152	34.4828	17.5	15.3509	15.625	27.6119	3.7037	7.69231	47.619	18.6441	16
1600014C10Rik	25.8427	35.7143	15.1515	6.43275	6.89655	2.5	4.82456	4.6875	2.23881	3.7037	3.07692	4.7619	10.1695	0
1600014C23Rik	0	0	0	0	0	0	0	0	0	0	0	0	0	0
1600014K23Rik	0	0	0	0	0	0	0	0	0	0	0	0	0	0
1600015I10Rik	0	0	0	0	0	0	0	0	0	0	0	0	0	0
1600016N20Rik	0	0	0	0	0	0	0	0	0	0	0	4.7619	1.69492	0
1600019K03Rik	0	0	0	0	0	0	0	0	0	0	0	0	0	0
1600020E01Rik	13.4831	4.46429	6.06061	2.33918	10.3448	6.66667	10.307	3.125	7.46269	0	10.7692	4.7619	6.77966	4
1600021P15Rik	1.1236	1.78571	0	0	0	0.833333	1.97368	0	2.23881	0	0	0	1.69492	0
1600025M17Rik	0	0	0	0	0	0	0	0	0	0	0	0	0	0
1600027N09Rik	0	0	0	0	0	0.833333	0	0	0	0	0	9.52381	0	0
1600029D21Rik	16.8539	100	3.0303	2.92398	3.44828	5	1.53509	6.25	0.746269	3.7037	0	100	18.6441	4
1600029I14Rik	0	0	0	0	0	0	0.657895	0	0.746269	0	0	90.4762	1.69492	0
1600029O15Rik	1.1236	0	0	1.75439	0	0	0	0	0.746269	0	0	0	0	0
1700001C02Rik	3.37079	0.892857	0	1.16959	0	0	0.219298	3.125	0	0	0	100	0	0
1700001C19Rik	0	0	0	0	0	0	0	0	0	0	0	0	0	0
1700001D01Rik	0	0	0	0	0	0	0	0	0	0	0	0	0	0
1700001F09Rik	0	0	0	0	0	0	0	0	0	0	0	0	0	0
1700001G11Rik	1.1236	0	0	0	0	0.833333	0.438596	0	0	0	0	0	0	0
1700001G17Rik	0	0	0	0	0	0	0.219298	0	0.746269	0	0	0	0	0
1700001J03Rik	0	0	0	0	0	0	0.219298	0	0	0	0	0	0	0
1700001J11Rik	0	0	0	0	0	0	0	0	0	0	0	0	0	0
1700001K19Rik	0	0	0	0	0	0	0	0	0	0	0	0	0	0
1700001K23Rik	0	0	0	0	0	0	0	0	0	0	0	0	0	0
1700001L05Rik	0	0	0	1.16959	0	0	0.438596	0	0.746269	0	0	0	0	0
1700001L19Rik	1.1236	0.892857	0	0	3.44828	0.833333	1.75439	0	1.49254	0	0	95.2381	3.38983	0
1700001O22Rik	0	0	0	0	0	0.833333	0.219298	0	0	0	0	4.7619	0	0
1700001P01Rik	0	0	0	0	0	0	0	1.5625	0	0	0	0	0	0
1700003C15Rik	0	0	0	0	0	0	0	0	0	0	0	0	0	0
1700003D09Rik	0	0	0	0	0	0	0	0	0	0	0	0	0	0
1700003E16Rik	0	0.892857	0	0	3.44828	0	0.438596	1.5625	0	0	0	66.6667	3.38983	0
1700003F12Rik	1.1236	3.57143	0	0	0	0	0.219298	1.5625	0.746269	0	0	0	0	0
1700003F17Rik	0	0	0	0	10.3448	0	0	0	0	0	0	0	0	0
1700003G13Rik	0	0	0	0	0	0	0	0	0	0	0	0	0	0
1700003G18Rik	0	0	0	0	0	0	0	0	0	0	0	0	0	0
1700003H04Rik	0	0	0	0	0	0	0	0	0	0	0	0	0	0
1700003L19Rik	0	0	0	0	0	0	0	0	0	0	0	0	0	0
1700003M02Rik	0	0	0	0	0	0	0	0	0	0	0	28.5714	0	0
1700003M07Rik	0	0	0	0	0	0	0	0	0	0	0	4.7619	0	0
1700003P14Rik	0	0	0	0	0	0	0	0	0	0	0	0	0	0
1700006A11Rik	0	0	0	0	0	0	0	0	0	0	0	0	0	0
1700006E09Rik	0	0	0	0	0	0	0	0	0	0	0	0	0	0
1700006F04Rik	0	0	0	0	0	0	0	0	0	0	0	0	0	0
1700006H21Rik	0	0	0	0	0	0	0	0	0	0	0	0	0	0
1700007B14Rik	0	0	0	0	0	0	0	0	0	0	0	0	0	0
1700007F19Rik	0	0	0	0	0	0	0	0	0	0	0	0	0	0
1700007G11Rik	0	0.892857	0	0	0	0	0.219298	0	0	0	0	76.1905	0	0
1700007I08Rik	0	0	0	0	0	0	0	0	0	0	0	0	0	0
1700007J10Rik	0	0	0	0	0	0	0.219298	0	0	0	0	0	0	0
1700007K09Rik	0	0	0	0	0	0	0	0	0	0	0	0	0	0
1700007K13Rik	0	0	0	0	3.44828	0	0.438596	1.5625	0.746269	0	1.53846	100	1.69492	0
1700007L15Rik	3.37079	0	3.0303	1.16959	0	0	0.877193	6.25	0	0	1.53846	19.0476	0	4
1700007P06Rik	0	0	0	0	0	0	0	0	0	0	0	0	0	0
1700008A04Rik	0	0	0	0	0	0	0	0	0	0	0	0	0	0
1700008F21Rik	0	0	0	0	0	0	0	0	0	0	0	0	0	0
1700008I05Rik	0	0	0	0	0	0	0	0	0	0	0	0	0	0
1700008J07Rik	3.37079	1.78571	0	2.33918	3.44828	0	3.28947	3.125	0.746269	0	1.53846	19.0476	6.77966	0
1700008K24Rik	0	0	0	0	0	0	0	0	0	0	0	0	0	0
1700008O03Rik	0	0	0	0	0	0	0.438596	0	0.746269	0	0	0	1.69492	0
1700008P02Rik	0	0	0	0	0	0	0	0	0	0	0	0	0	0
1700008P20Rik	0	0	0	0	0	0	0	0	0	0	0	9.52381	0	0
1700009C05Rik	0	0	0	0	0	0	0	0	0	0	0	0	0	0
1700009J07Rik	0	0	0	0	0	0	0	0	0	0	0	0	0	0
1700009N14Rik	0	0	0	0	0	0	0	0	0	0	0	0	0	0
1700009P17Rik	3.37079	3.57143	0	1.16959	6.89655	0	1.31579	0	2.23881	0	0	100	3.38983	0
1700010B08Rik	0	0	0	0	0	0	0	0	0	0	0	0	0	0
1700010D01Rik	0	0	0	0	0	0	0	0	0	0	0	0	0	0
1700010I02Rik	0	0	0	0	0	0	0	0	0	0	0	0	0	0
1700010I14Rik	0	0.892857	0	0	0	0	0	0	0	0	0	4.7619	0	0
1700010J16Rik	0	0	0	0	0	0	0	0	0	0	0	0	0	0
1700010K23Rik	0	0	0	0	0	0	0	0	0	0	0	0	0	0
1700010M22Rik	0	0	0	0	0	0	0	0	0	0	0	0	0	0
1700011A15Rik	0	0	0	0	0	0	0	0	0	0	0	0	0	0
1700011B04Rik	0	0	0	0	0	0	0	0	0	0	0	0	0	0
1700011E24Rik	0	0	0	0	0	0	0	0	0	0	0	0	0	0
1700011F03Rik	0	0	0	0	0	0	0	0	0	0	0	0	0	0
1700011F14Rik	0	0	0	0	0	0	0	0	0	0	0	0	0	0
1700011H14Rik	0	0	0	0	0	0	0	0	0	0	0	0	0	0
1700011I03Rik	1.1236	0	0	0	0	0	0	12.5	0	0	0	0	0	0
1700011J10Rik	26.9663	17.8571	6.06061	8.18713	17.2414	10	11.6228	12.5	8.95522	0	4.61538	52.381	32.2034	12
1700011L22Rik	0	0	0	0	0	0	0	0	0	0	0	0	0	0
1700011M02Rik	0	0	0	0	0	0	0	0	0	0	0	0	0	0
1700012A03Rik	0	0	0	0	0	0	0	0	0	0	0	0	0	0
1700012A16Rik	1.1236	6.25	0	0	0	0	0	0	0	0	0	0	0	0
1700012B07Rik	0	0	0	0	0	0	1.09649	0	0	0	0	0	0	0
1700012B09Rik	0	0	0	0	0	0	0	0	0	0	0	42.8571	0	0
1700012B15Rik	16.8539	8.03571	6.06061	12.2807	10.3448	7.5	6.79825	10.9375	3.73134	0	1.53846	14.2857	11.8644	0
1700012D01Rik	2.24719	0	0	0.584795	0	1.66667	2.63158	3.125	1.49254	0	1.53846	9.52381	6.77966	0
1700012D14Rik	1.1236	0.892857	3.0303	0	3.44828	0	0.657895	0	0	0	0	9.52381	0	0
1700012I11Rik	0	0	0	0	0	0	0	0	0	0	0	0	0	0
1700012L04Rik	2.24719	0	0	0	0	0	0	0	0	0	0	0	0	0
1700012P22Rik	0	0	0	0	0	0	0	0	0	0	0	0	0	0
1700013D24Rik	0	0	0	0	0	0	0	0	0	0	0	0	0	0
1700013F07Rik	0	0	0	0	0	0	0.219298	0	0	0	0	85.7143	0	0
1700013G23Rik	0	0.892857	3.0303	0	0	0	1.09649	0	0.746269	0	0	28.5714	1.69492	0
1700013G24Rik	0	0	0	0	0	0	0	0	0	0	0	0	0	0
1700013H16Rik	1.1236	0	0	0	0	0	0	0	0	0	0	0	0	0
1700013N18Rik	0	0	0	0	0	0	0	0	0	0	0	0	0	0
1700014N06Rik	0	0	0	0	0	0	0	0	0	0	0	0	0	0
1700015E13Rik	0	0	0	0	0	0	0	0	0	0	0	0	0	0
1700015F17Rik	0	0	0	0	0	0	0	0	0	0	0	0	0	0
1700015G11Rik	0	0	0	0	0	0	0	0	0	0	0	0	0	0
1700016C15Rik	0	0	0	0	0	0	0	0	0	0	0	9.52381	0	0
1700016D06Rik	0	0	0	0	0	0.833333	0	0	0	0	0	0	0	0
1700016G22Rik	0	0	0	0	0	0	0	0	0	0	0	0	0	0
1700016H13Rik	0	0	0	0	0	0	0	0	0	0	0	0	0	0
1700016K19Rik	2.24719	1.78571	0	0.584795	0	0	0.877193	0	0.746269	0	3.07692	100	0	0
1700016L04Rik	0	0	0	0	0	0	0	0	0	0	0	0	0	0
1700016L21Rik	0	0	0	0	0	0	0	0	0	0	0	0	0	0
1700016M24Rik	0	0	0	0	0	0	0	0	0	0	0	0	0	0
1700016P04Rik	0	0	0	0	0	0	0	0	0	0	0	0	0	0
1700017B05Rik	8.98876	25.8929	9.09091	4.67836	0	5	7.01754	4.6875	3.73134	0	7.69231	23.8095	0	4
1700017D01Rik	0	0	0	0	0	0	0	0	0	0	0	0	0	0
1700017G19Rik	0	0	0	0	0	0	0	0	0	0	0	0	0	0
1700017J07Rik	1.1236	0	0	0	0	0	0	0	0	0	0	0	0	0
1700017N19Rik	0	0	0	0	0	0	0	0	0	0	0	0	0	0
1700018A04Rik	0	0	0	0	0	0.833333	3.50877	0	0	0	1.53846	9.52381	0	0
1700018B08Rik	0	0	0	0	0	0	0	0	0	0	0	0	0	0
1700018B24Rik	0	0	0	0	0	0	0	0	0	0	0	0	0	0
1700018C11Rik	0	0	0	0	0	0	0	0	0	0	0	0	0	0
1700018F24Rik	0	0	0	0	0	0	0	0	0	0	0	0	0	0
1700018G05Rik	0	0	0	0	0	0	0	0	0	0	0	0	0	0
1700018L02Rik	1.1236	0	0	0	0	0	0.438596	0	0	0	0	4.7619	0	0
1700018L24Rik	0	0	0	0	0	0	0	0	0	0	0	0	0	0
1700019A02Rik	0	0	0	0	0	0	0	0	0	0	0	0	0	0
1700019B03Rik	0	0	0	0	0	0	0	0	0	0	0	0	0	0
1700019B21Rik	0	0	0	0	0	0	0	0	0	0	0	0	0	0
1700019D03Rik	0	0	3.0303	0	0	0	0.438596	0	6.71642	0	1.53846	0	0	0
1700019E08Rik	0	0	0	0	0	0	0	0	0	0	0	0	0	0
1700019E19Rik	8.98876	3.57143	3.0303	2.33918	31.0345	27.5	25.8772	3.125	24.6269	11.1111	13.8462	100	22.0339	44
1700019G17Rik	0	0	0	0	0	0	0	0	0	0	0	19.0476	1.69492	0
1700019G24Rik	0	0	0	0	0	0	0.219298	0	0	0	0	4.7619	0	0
1700019L03Rik	0	0	0	0	0	0	0	0	0	0	0	52.381	0	0
1700019M22Rik	0	0	0	0	0	0	0	0	0	0	0	0	0	0
1700019N12Rik	0	0	0	0	0	0	0	0	0	0	0	0	0	0
1700019N19Rik	0	0	0	0	0	0	0	0	0	0	0	0	0	0
1700019O17Rik	0	0	0	0	0	0	0	0	0	0	0	0	0	0
1700020A23Rik	0	0	0	0	0	0	0	0	0	0	0	0	0	0
1700020D05Rik	0	0	0	0	0	0	0.219298	0	0	0	0	0	0	0
1700020G17Rik	0	0	0	0	0	0	0	0	0	0	0	0	0	0
1700020I14Rik	17.9775	19.6429	12.1212	21.0526	13.7931	15	9.42982	20.3125	12.6866	14.8148	4.61538	47.619	15.2542	12
1700020L24Rik	3.37079	2.67857	0	1.16959	0	0	0	4.6875	0.746269	3.7037	1.53846	0	0	0
1700020M21Rik	0	0	0	0	0	0	0	0	0	0	0	0	0	0
1700020N01Rik	0	0	0	0	0	0	0	0	0	0	0	0	0	0
1700020N15Rik	0	0	0	0	0	0	0	0	0	0	0	0	0	0
1700020N18Rik	0	0	0	0	0	0	0	0	0	0	0	9.52381	0	0
1700020O03Rik	5.61798	2.67857	3.0303	1.75439	3.44828	0	1.97368	6.25	4.47761	7.40741	3.07692	4.7619	0	0
1700021C14Rik	7.86517	4.46429	9.09091	1.16959	6.89655	2.5	1.31579	0	2.23881	0	1.53846	19.0476	8.47458	0
1700021F05Rik	25.8427	13.3929	3.0303	8.18713	13.7931	13.3333	14.4737	7.8125	19.403	3.7037	15.3846	38.0952	10.1695	12
1700021F07Rik	0	0	0	0	0	0	0	0	0	0	0	0	0	0
1700021K19Rik	3.37079	4.46429	3.0303	1.16959	0	2.5	4.16667	3.125	1.49254	0	0	4.7619	16.9492	12
1700021N21Rik	0	0	0	0	0	0.833333	0	0	0	0	0	0	0	0
1700022A21Rik	0	0	0	0	0	0	0	0	0	0	0	0	0	0
1700022A22Rik	0	0	0	0	0	0	0	0	0	0	0	0	0	0
1700022E09Rik	0	0	0	0	0	0	0	0	0	0	0	0	0	0
1700022H16Rik	0	0	0	0	0	0	0	0	0.746269	0	0	0	0	0
1700022I11Rik	0	0	0	0	0	0	0	0	0	0	0	0	0	0
1700022P22Rik	0	0	0	0	0	0	0	0	0	0	0	0	0	0
1700023A16Rik	0	0	0	0	0	0	0	0	0	0	0	0	0	0
1700023C21Rik	0	0	0	0	0	0	0	0	0	0	0	0	0	0
1700023E05Rik	0	0	0	0	0	0	0	0	0	0	0	0	0	0
1700023F02Rik	0	0	0	0	0	0	0	0	0	0	0	0	0	0
1700023F06Rik	0	0.892857	0	0.584795	0	0	1.53509	0	2.23881	0	4.61538	0	0	0
1700023L04Rik	0	3.57143	3.0303	0	13.7931	1.66667	0.438596	0	0.746269	0	0	57.1429	0	0
1700024B18Rik	0	0	0	0	0	0	0	0	0.746269	0	0	0	0	0
1700024F13Rik	0	0	0	0	0	0	0	0	0	0	0	0	0	0
1700024G13Rik	0	0	0	0	0	0	0	0	0	0	0	100	0	0
1700024P03Rik	0	0	0	0	0	0	0	0	0	0	0	0	0	0
1700024P04Rik	0	0	0	0	0	0	0	0	0	0	0	0	0	0
1700024P16Rik	0	0	0	0	0	0	0	0	0	0	0	0	0	0
1700025B11Rik	0	0	0	0	0	0.833333	0	0	0	0	0	0	0	0
1700025C18Rik	0	0	0	0	0	0	0	0	0	0	0	0	0	0
1700025E21Rik	0	0	0	0	0	0	0	0	0	0	0	0	0	0
1700025F22Rik	0	0	0	0	0	0	0	0	0	0	0	0	0	0
1700025F24Rik	0	0	0	0	0	0	0	0	0	0	0	4.7619	0	0
1700025G04Rik	25.8427	0	0	28.0702	3.44828	1.66667	23.4649	7.8125	20.1493	0	16.9231	4.7619	8.47458	24
1700025K23Rik	0	0.892857	0	0	0	0	4.16667	0	5.22388	0	0	52.381	0	0
1700025K24Rik	0	0	0	0	0	0	0	0	0	0	0	0	0	0
1700025M24Rik	0	0	0	0	0	0	0	0	0	0	0	0	0	0
1700025N23Rik	1.1236	0	0	0	0	0	0	0	0	0	0	0	0	0
1700026D08Rik	0	0	0	0	0	0	0.438596	0	0	0	0	80.9524	0	0
1700026D11Rik	0	0	0	0	0	0	0	0	0	0	0	0	0	0
1700026F02Rik	0	0	0	0	0	0	0	0	0	0	0	0	0	0
1700026J04Rik	0	0	0	0	0	0	0	0	0	0	0	0	0	0
1700026L06Rik	5.61798	9.82143	6.06061	2.33918	0	0.833333	0.877193	0	0.746269	0	0	95.2381	0	0
1700027A15Rik	0	0	0	0	0	0	0	0	0	0	0	0	0	0
1700027A23Rik	3.37079	1.78571	3.0303	0	0	0	0.438596	0	0	0	0	90.4762	0	0
1700027D21Rik	0	0	0	0	0	0	0	0	0	0	0	0	0	0
1700027F09Rik	0	0	0	0	0	0	0	0	0	0	0	0	0	0
1700027H10Rik	0	0	0	0	0	0	0	0	0	0	0	0	0	0
1700027I24Rik	0	0	0	0	0	0	0	0	0	0	0	0	0	0
1700027J07Rik	0	0	3.0303	0	0	0	0	0	0	0	0	0	0	0
1700028B04Rik	0	0	0	0	0	0	0	0	0	0	0	0	0	0
1700028D13Rik	0	0	0	0	0	0	0	0	0	0	0	0	0	0
1700028E10Rik	0	0	3.0303	1.75439	0	0	0	0	0	0	0	0	0	0
1700028I16Rik	0	0	0	0	0	0	0	0	0	0	0	0	0	0
1700028J19Rik	1.1236	0	0	0	6.89655	0	0.438596	0	0	0	0	0	0	0
1700028K03Rik	1.1236	0	0	0	0	0	0.219298	0	0	0	0	0	0	0
1700028M03Rik	0	0	0	0	0	0	0	0	0	0	0	0	0	0
1700028P14Rik	0	0	0	0.584795	0	0	1.31579	0	0	0	0	90.4762	0	0
1700028P15Rik	0	0	0	0	0	0	0	0	0	0	0	0	0	0
1700029B22Rik	0	0	0	0	0	0	0	0	0	0	0	0	0	0
1700029F09Rik	11.236	2.67857	9.09091	9.35673	3.44828	3.33333	4.60526	9.375	2.23881	0	3.07692	14.2857	8.47458	4
1700029F12Rik	0	0	0	0	0	0	0	0	0	0	0	0	0	0
1700029G01Rik	2.24719	1.78571	0	0	0	3.33333	7.67544	0	8.20896	3.7037	9.23077	4.7619	3.38983	36
1700029H14Rik	0	0	0	0	0	0	0	0	0	0	0	0	0	0
1700029I01Rik	6.74157	10.7143	0	2.33918	0	0.833333	0.657895	6.25	2.23881	0	0	0	0	0
1700029I15Rik	0	0.892857	0	0	0	0	0.219298	0	0	0	1.53846	0	1.69492	4
1700029J03Rik	0	0	0	0	0	0	0	0	0	0	0	4.7619	0	0
1700029J07Rik	1.1236	0	6.06061	1.16959	0	1.66667	0.877193	0	0.746269	0	4.61538	52.381	3.38983	0
1700029J11Rik	0	0	3.0303	0	0	0	0	0	0	0	0	0	0	0
1700029M20Rik	0	0	0	0	0	0	0	0	0	0	0	0	0	0
1700029N11Rik	0	0	0	0	0	0	0	0	0	0	0	0	0	0
1700029P11Rik	0	0	0	0	0	0	0	0	0	0	0	0	0	0
1700030A11Rik	0	0	0	0	0	0	0	0	0	0	0	0	0	0
1700030C10Rik	0	1.78571	3.0303	0	3.44828	1.66667	0.438596	0	0	0	0	9.52381	0	0
1700030F04Rik	0	0	0	0	0	0	0	0	0	0	0	0	0	0
1700030F18Rik	0	0	0	0	0	0	0	0	0	0	0	0	0	0
1700030J22Rik	0	0.892857	0	0	0	0	0.219298	0	0	0	0	47.619	0	0
1700030K09Rik	2.24719	0.892857	6.06061	0	3.44828	0.833333	3.94737	0	3.73134	0	1.53846	19.0476	3.38983	4
1700030L20Rik	0	0	0	0	0	0	0	0	0	0	0	0	0	0
1700030M09Rik	0	0	0	0	0	0	0	0	0	0	0	0	0	0
1700030N03Rik	0	0	0	0	0	0	0	0	0	0	0	0	0	0
1700030O20Rik	0	0	0	0	0	0	0	0	0	0	0	0	0	0
1700031A10Rik	0	0	0	0	0	0	0	0	0	0	0	0	0	0
1700031F05Rik	0	0	0	0	0	0	0	0	0	0	0	0	0	0
1700031M16Rik	0	0	0	0	0	0	0	0	0	0	0	0	0	0
1700031P21Rik	0	0	0	0	0	0	0	0	0	0	0	0	0	0
1700034E13Rik	0	0	0	0	0	0	0	0	0	0	0	14.2857	0	0
1700034F02Rik	0	0	0	0	0	0	0	0	0	0	0	4.7619	0	0
1700034G24Rik	0	0	0	0	0	0	0	0	0	0	0	0	0	0
1700034H14Rik	10.1124	13.3929	3.0303	5.26316	13.7931	6.66667	14.4737	6.25	18.6567	3.7037	13.8462	19.0476	11.8644	16
1700034H15Rik	0	0	0	0	0	0	0.219298	0	0.746269	0	0	0	0	0
1700034I23Rik	0	0	0	0	0	0	0.219298	0	0	0	0	0	0	0
1700034J05Rik	0	0	0	0	0	0	0	0	0	0	0	0	0	0
1700034K08Rik	0	0	0	0	0	0	0	0	0	0	0	0	0	0
1700034O15Rik	0	0	0	0	0	0	0	0	0	0	0	0	0	0
1700034P13Rik	0	0	0	0	0	0	0	0	0	0	0	0	0	0
1700036G14Rik	0	0	0	0	0	0	0	0	0	0	0	0	0	0
1700037C18Rik	4.49438	0.892857	0	1.75439	0	5	1.53509	4.6875	2.23881	3.7037	1.53846	66.6667	6.77966	4
1700037H04Rik	14.6067	25	9.09091	5.84795	10.3448	2.5	4.16667	6.25	5.22388	3.7037	1.53846	33.3333	8.47458	8
1700039E15Rik	0	0	0	0	0	0	0	0	0	0	0	0	0	0
1700039E22Rik	0	0	0	0	0	0	0	0	0	0	0	0	0	0
1700040I03Rik	10.1124	4.46429	3.0303	7.01754	3.44828	8.33333	6.14035	3.125	5.97015	0	7.69231	28.5714	18.6441	4
1700040L02Rik	1.1236	0	0	1.16959	0	0	0.219298	0	0	0	0	66.6667	3.38983	0
1700040N02Rik	0	0	0	0	0	0	0	0	0	0	0	0	0	0
1700041C23Rik	0	0	0	0	0	0	0	0	0	0	0	0	0	0
1700041M19Rik	0	0	0	0	0	0	0	0	0	0	0	0	0	0
1700042B14Rik	0	0	0	0	0	0	0	0	0	0	0	0	0	0
1700042G07Rik	0	0	0	0	0	0	0	0	0	0	0	0	0	0
1700042G15Rik	0	0	0	0	0	0	0	0	0	0	0	0	0	0
1700042O10Rik	0	0	0	0	0	0	0	0	0	0	0	0	0	0
1700044C05Rik	0	0	0	0	0	0	0	0	0	0	0	0	0	0
1700044K03Rik	0	0	0	0	0	0	0	0	0	0	0	0	0	0
1700045H11Rik	0	0	0	0	0	0	0	0	0	0	0	0	0	0
1700045I19Rik	0	0	0	0	0	0	0.219298	0	0	3.7037	0	0	0	0
1700046C09Rik	0	0	0	0	0	0	0	0	0	0	0	0	0	0
1700047G03Rik	0	0	0	0	0	0	0	0	0	0	0	0	0	0
1700047I17Rik2	0	0	0	0	0	0	0	0	0	0	0	0	0	0
1700047L14Rik	0	0	0	0	0	0	0	0	0	0	0	0	0	0
1700047M11Rik	0	0.892857	0	0	0	0	0.219298	0	0	0	0	0	0	0
1700048M11Rik	0	0	0	0	0	0	0	0	0	0	0	0	0	0
1700048O20Rik	0	0	0	0	0	0	1.31579	0	0	0	1.53846	0	0	0
1700049E15Rik	0	0	0	0	0	0	0	0	0	0	0	0	0	0
1700049E22Rik	0	0	0	0	0	0	0	0	0	0	0	0	0	0
1700049G17Rik	2.24719	3.57143	3.0303	0.584795	0	0	1.97368	0	2.23881	0	1.53846	9.52381	1.69492	4
1700049L16Rik	0	0	0	0	0	0	0	0	0	0	0	0	0	0
1700051A21Rik	0	0	0	0	0	0	0	0	0	0	0	0	0	0
1700052I22Rik	0	0	0	0	0	0	0	0	0	0	0	0	0	0
1700052K11Rik	3.37079	0.892857	0	2.33918	0	2.5	1.53509	1.5625	2.98507	3.7037	3.07692	4.7619	5.08475	4
1700052N19Rik	10.1124	4.46429	6.06061	1.75439	3.44828	1.66667	4.16667	7.8125	4.47761	3.7037	3.07692	4.7619	1.69492	0
1700054A03Rik	0	0	0	0	0	0	0	0	0	0	0	0	0	0
1700054K19Rik	0	0	0	0	0	0	0	0	0	0	0	0	0	0
1700054M17Rik	0	0	0	0	0	0	0	0	0	0	0	0	0	0
1700054N08Rik	1.1236	1.78571	3.0303	1.75439	0	0	0	0	0.746269	0	0	0	0	4
1700054O13Rik	0	0	0	0	0	0	0	0	0	0	0	0	0	0
1700055C04Rik	0	0	0	0	0	0	0	0	0	0	0	0	0	0
1700055N04Rik	0	0	0	0	0	0	0	0	0	0	0	0	0	0
1700056E22Rik	4.49438	2.67857	6.06061	0	0	0.833333	0.219298	0	0	0	0	9.52381	3.38983	0
1700057G04Rik	0	0	0	0	0	0	0	0	0	0	0	0	0	0
1700057H15Rik	0	0	0	0	0	0	0	0	0	0	0	0	0	0
1700057K13Rik	0	0	0	0	0	0	0	0	0	0	0	0	0	0
1700058G18Rik	0	0	0	0	0	0	0	0	0	0	0	0	0	0
1700060C16Rik	0	0	0	0	0	0	0	0	0	0	0	0	0	0
1700060C20Rik	0	0	0	0	0	0	0.219298	0	0	0	0	0	0	0
1700061F12Rik	0	0	0	0	0	0	0	0	0	0	0	0	0	0
1700061G19Rik	1.1236	1.78571	0	0	0	0	0.219298	3.125	0	3.7037	1.53846	0	0	0
1700061I17Rik	0	0	0	0	0	0	0	0	0	0	0	0	0	0
1700061J05Rik	0	0	0	0	0	0	0.219298	0	0	0	0	0	0	0
1700063A18Rik	0	0	0	0	0	0	0	0	0	0	0	0	0	0
1700063D05Rik	0	0	0	0	0	0	0	0	0	0	0	0	0	0
1700063O14Rik	0	0	0	0	0	0	0	0	0	0	0	0	0	0
1700064J06Rik	0	0	0	0	0	0	0	0	0	0	0	0	0	0
1700064M15Rik	0	0	0	0	0	0	0.219298	0	0	0	0	0	0	0
1700065D16Rik	1.1236	0	0	0	0	0	0	0	0	0	0	0	0	0
1700065I16Rik	0	0	0	0	0	0	0	0	0	0	0	0	0	0
1700065I17Rik	0	0	0	0	0	0	0	0	0	0	0	0	0	0
1700065J11Rik	0	0	0	0	0	0	0	0	0	0	0	0	0	0
1700065J18Rik	0	0	0	0	0	0	0	0	0	0	0	0	0	0
1700065O20Rik	0	0	0	0	0	0	0	0	0	0	0	0	0	0
1700066B17Rik	0	0	0	0	0	0	0	0	0	0	0	0	0	0
1700066B19Rik	0	0.892857	3.0303	2.33918	0	0	0	0	0	0	0	4.7619	1.69492	0
1700066J24Rik	0	0	0	0	0	0	0	0	0	0	0	0	0	0
1700066M21Rik	2.24719	4.46429	0	1.16959	0	3.33333	1.97368	4.6875	2.98507	0	4.61538	4.7619	1.69492	8
1700066N21Rik	0	0	0	0	0	0	0	0	0	0	0	0	0	0
1700066O22Rik	0	0	0	0	0	0	0	0	0	0	0	0	0	0
1700067G17Rik	0	0	0	0	0	0	0	0	0	0	0	0	0	0
1700067K01Rik	0	0	0	0	0	0	0	0	0	0	0	0	1.69492	0
1700067P10Rik	0	0	0	0	0	0	0	0	0	0	0	0	0	0
1700069L16Rik	0	0	0	0	0	0	0	0	0	0	0	0	0	0
1700069P05Rik	0	0	0	0	0	0	0	0	0	0	0	0	0	0
1700071K01Rik	0	0.892857	0	0	0	0	0	0	0	0	0	0	0	0
1700071M16Rik	0	0	0	0	0	0.833333	0	0	0	0	0	0	0	0
1700072B07Rik	0	0	0	0	0	0	0	0	0	0	0	0	0	0
1700072O05Rik	0	0	0	0	0	0	0	0	0	0	0	0	0	0
1700073E17Rik	0	0	3.0303	0	0	0	0	0	0	0	0	0	0	0
1700074H08Rik	0	0	0	0	0	0	0	0	0	0	0	0	0	0
1700074P13Rik	0	0	0	0	0	0	0	0	0	0	0	0	0	0
1700080E11Rik	0	0	0	0	0	0	0	0	0	0	0	0	0	0
1700080N15Rik	0	0	0	0	0	0	0	0	0	0	0	0	0	0
1700080O16Rik	0	0	0	0	0	0	0	0	0	0	0	0	0	0
1700081H04Rik	0	0	0	0	0	0	0	0	0	0	0	0	0	0
1700081H22Rik	0	0	0	0	0	0	0	0	0	0	0	0	0	0
1700081L11Rik	32.5843	28.5714	27.2727	20.4678	10.3448	16.6667	17.3246	32.8125	12.6866	11.1111	9.23077	23.8095	16.9492	16
1700084C01Rik	0	0	0	0	0	0	0	0	0	0	0	0	0	0
1700084E18Rik	0	0	3.0303	0	0	0	1.31579	0	2.23881	0	0	0	6.77966	4
1700084F23Rik	0	0	0	0	0	0	0	0	0	0	0	0	0	0
1700084J12Rik	0	0	0	0	0	0	0	0	0	0	0	0	0	0
1700085B03Rik	0	0	0	0	0	0	0	0	0	0	0	0	0	0
1700085C21Rik	0	0	0	0	0	0	0	0	0	0	0	0	0	0
1700086L19Rik	0	0	0	0	0	0	0	0	0	0	0	0	0	0
1700086O06Rik	0	2.67857	0	0	0	1.66667	4.16667	1.5625	1.49254	0	0	4.7619	1.69492	4
1700088E04Rik	1.1236	0	0	0.584795	0	0.833333	1.75439	0	5.97015	0	3.07692	95.2381	6.77966	4
1700090G07Rik	0	0	0	0	0	0	0	0	0	0	0	0	0	0
1700091E21Rik	0	0	0	0	0	0	0	0	0	0	0	0	0	0
1700092C02Rik	0	0	0	0	0	0	0	0	0	0	0	0	0	0
1700092C10Rik	0	0	0	0	0	0	0	0	0	0	0	0	0	0
1700092E19Rik	0	0	0	0	0	0	0	0	0	0	0	0	0	0
1700092K14Rik	0	0	0	0	0	0	0	0	0	0	0	0	0	0
1700092M07Rik	0	0	0	0	0	0	0	0	0	0	0	0	0	0
1700093K21Rik	0	0	0	0	0	0	0	0	0	0	0	0	0	0
1700094D03Rik	3.37079	3.57143	0	3.50877	0	7.5	4.16667	4.6875	3.73134	3.7037	6.15385	100	8.47458	0
1700094J05Rik	0	0	0	0	0	0	0	0	0	0	0	0	0	0
1700094M24Rik	0	0	0	0	0	0	0	0	0	0	0	0	0	0
1700095A21Rik	0	0	0	0	0	0	0	0	0	0	0	0	0	0
1700095B10Rik	0	0	0	0	0	0	0	0	0	0	0	0	0	0
1700095B22Rik	0	0	0	0	0	0	0.219298	0	0	0	0	0	0	0
1700096J18Rik	0	0	0	0	0	0	0	0	0	0	0	0	0	0
1700096K18Rik	5.61798	1.78571	9.09091	6.43275	6.89655	5.83333	7.01754	4.6875	5.22388	3.7037	3.07692	9.52381	3.38983	4
1700097N02Rik	1.1236	0	6.06061	4.09357	0	0	0	0	0	0	0	0	0	0
1700100L14Rik	0	0	0	0	0	0	0	0	0	0	0	0	0	0
1700101E01Rik	0	0	0	0	0	0	0	0	0	0	0	4.7619	0	0
1700101I11Rik	0	0	0	0	0	0	0.219298	0	0	0	0	0	0	0
1700101O22Rik	0	0	0	0	0	0	0	0	0	0	0	0	0	0
1700102H20Rik	1.1236	0	0	0	0	0	0.219298	0	0.746269	0	0	0	3.38983	0
1700102P08Rik	2.24719	0.892857	0	0.584795	0	0	0.219298	0	0	3.7037	0	0	0	0
1700104A03Rik	0	0	0	0	0	0	0	0	0	0	0	0	0	0
1700105P06Rik	0	0	0	0	0	0	0.438596	0	0	0	0	0	1.69492	0
1700106J16Rik	0	0	0	0	0	0	0	0	0	0	0	0	0	0
1700106N22Rik	8.98876	3.57143	0	2.92398	0	1.66667	4.38596	6.25	2.98507	0	4.61538	9.52381	0	4
1700108F19Rik	0	0	0	0	0	0	0	0	0.746269	0	1.53846	0	0	0
1700108J01Rik	0	0	0	0	0	0	0	0	0	0	0	0	1.69492	0
1700108M19Rik	0	0.892857	0	0	0	0	0	0	0	0	0	0	0	0
1700109F18Rik	0	0	0	0	0	0	0	0	0	0	0	0	0	0
1700109G14Rik	0	0	0	0	0	0	0	0	0	0	0	0	0	0
1700109G15Rik	0	0	0	0	0	0	0	0	0	0	0	0	0	0
1700109H08Rik	2.24719	0.892857	0	0	3.44828	0.833333	0.657895	0	1.49254	0	0	0	0	0
1700109I08Rik	0	0	0	0	0	0	0	0	0	0	0	0	0	0
1700110C19Rik	0	0	0	0	0	0	0	0	0	0	0	0	0	0
1700110I01Rik	0	0	0	0	0	0	0	0	0.746269	0	0	4.7619	0	4
1700110K17Rik	1.1236	0	0	0	0	0	0	0	0	0	0	0	0	0
1700110M21Rik	0	0	0	0	0	0	0	0	0	0	0	0	0	0
1700111N16Rik	0	0	0	0	0	0	0	0	0	0	0	0	0	0
1700112E06Rik	8.98876	7.14286	0	1.75439	6.89655	1.66667	1.75439	4.6875	1.49254	3.7037	0	28.5714	8.47458	4
1700112H15Rik	0	0	0	0	0	0	0	0	0	0	0	0	0	0
1700113A16Rik	3.37079	1.78571	12.1212	0.584795	0	1.66667	3.28947	4.6875	0	3.7037	0	28.5714	3.38983	8
1700113H08Rik	0	0	0	0	0	0	0	0	0	0	0	0	0	0
1700113I22Rik	0	0.892857	0	0	0	0.833333	3.07018	0	2.98507	0	1.53846	14.2857	6.77966	0
1700119H24Rik	0	0	0	0	0	0	0	0	0	0	0	0	0	0
1700120C14Rik	0	0	0	0	0	0	0	1.5625	0.746269	0	0	0	0	0
1700120E14Rik	0	0	0	0	0	0	0	0	0	0	0	0	0	0
1700120G07Rik	0	0	0	0	0	0	0	0	0	0	0	0	0	0
1700120K04Rik	0	0	0	0	0	0	0	0	0	0	0	0	0	0
1700121L16Rik	0	0	0	0	0	0	0	0	0	0	0	0	0	0
1700121N20Rik	0	0	0	0	0	0	0	0	0	0	0	0	0	0
1700122O11Rik	0	0	0	0	0	0	0	0	0	0	0	0	0	0
1700123I01Rik	0	0	0	0	0	0.833333	0	0	0	0	0	4.7619	0	0
1700123K08Rik	0	0	0	0	0	0	0	0	0	0	0	0	0	0
1700123L14Rik	0	0	0	0	0	0	0	0	0	0	0	0	0	0
1700123M08Rik	1.1236	0.892857	0	1.75439	3.44828	0.833333	1.31579	0	0	0	1.53846	0	1.69492	8
1700123O12Rik	0	0	0	0	0	0	0	0	0	0	0	0	0	0
1700123O20Rik	33.7079	17.8571	15.1515	21.6374	51.7241	18.3333	25.8772	25	26.1194	7.40741	21.5385	47.619	27.1186	16
1700123O21Rik	0	0	0	0	0	0	0	0	0	0	0	0	0	0
1700125D06Rik	0	0	0	0	0	0	0	0	0	0	0	0	5.08475	0
1700125G02Rik	0	0	0	0	0	0	0	0	0	0	0	0	0	0
1700125G22Rik	0	0	0	0	0	0	0	0	0	0	0	4.7619	0	0
1700125H03Rik	0	0	0	0	0	0	0	0	0	0	0	0	0	0
1700125H20Rik	0	0	0	0	0	0	0	0	0	0	0	0	0	0
1700126H18Rik	0	0	0	0	0	0	0	0	0	0	0	0	0	0
1700128A07Rik	0	0	0	0	0	0	0	0	0	0	0	0	0	0
1700128F08Rik	0	0	0	0	0	0	0	0	0	0	0	0	0	0
1700129C05Rik	0	0	0	0	0	0	0	0	0	0	0	0	0	0
1810006J02Rik	1.1236	0	0	2.92398	0	0	0	0	0	0	0	0	0	0
1810006K21Rik	94.382	75.8929	60.6061	71.345	72.4138	57.5	64.2544	65.625	75.3731	25.9259	56.9231	80.9524	83.0508	68
1810007C17Rik	0	0	0	0	0	0	0	0	0	0	0	0	0	0
1810007D17Rik	0	0	0	0	0	0	0	0	0	0	0	4.7619	0	0
1810007I06Rik	0	0	0	0	0	0	0	0	0	0	0	0	0	0
1810008A18Rik	24.7191	18.75	12.1212	13.4503	17.2414	6.66667	12.7193	15.625	14.1791	7.40741	12.3077	9.52381	6.77966	4
1810008I18Rik	0	0	0	0	0	0	0	0	0	0	0	28.5714	0	0
1810009A15Rik	46.0674	37.5	33.3333	33.3333	31.0345	25.8333	27.193	40.625	38.806	37.037	18.4615	95.2381	30.5085	24
1810009J06Rik	0	0	0	0	0	0	0	0	0	0	0	0	0	0
1810010D01Rik	0	0	0	0	0	0	0.219298	0	0	0	0	9.52381	1.69492	0
1810010H24Rik	1.1236	3.57143	3.0303	1.16959	3.44828	5	74.1228	3.125	23.8806	3.7037	7.69231	28.5714	27.1186	0
1810011H11Rik	7.86517	15.1786	0	1.75439	0	0	0.438596	0	0.746269	0	0	0	0	0
1810011O10Rik	6.74157	7.14286	0	0.584795	51.7241	24.1667	16.886	0	2.98507	3.7037	3.07692	0	0	0
1810012K16Rik	0	0	0	0.584795	0	0	0	0	0	0	0	0	0	0
1810012P15Rik	5.61798	4.46429	6.06061	4.67836	10.3448	5.83333	4.38596	4.6875	2.98507	0	1.53846	9.52381	8.47458	8
1810013A23Rik	0	0	0	0	0	0	0	0	0	0	0	0	0	0
1810013D10Rik	33.7079	24.1071	24.2424	18.1287	34.4828	10.8333	20.1754	29.6875	28.3582	3.7037	20	42.8571	28.8136	12
1810013L24Rik	11.236	16.0714	12.1212	10.5263	17.2414	11.6667	17.9825	7.8125	10.4478	11.1111	3.07692	38.0952	16.9492	8
1810014B01Rik	2.24719	0	0	1.75439	6.89655	1.66667	3.50877	0	5.97015	0	1.53846	4.7619	1.69492	12
1810014F10Rik	14.6067	20.5357	0	0	0	3.33333	7.23684	3.125	8.95522	0	9.23077	14.2857	20.339	8
1810018F18Rik	0	0	0	0	0	0	0	0	0	0	0	0	0	0
1810019D21Rik	2.24719	0.892857	0	0	0	0	2.85088	0	0.746269	0	1.53846	66.6667	35.5932	0
1810019J16Rik	0	1.78571	0	0	0	0	0.219298	1.5625	0	0	0	23.8095	18.6441	0
1810020D17Rik	22.4719	24.1071	3.0303	8.77193	41.3793	13.3333	18.2018	9.375	17.1642	0	13.8462	42.8571	22.0339	12
1810020O05Rik	0	0	0	0	0	0	0	0	0	0	0	14.2857	0	0
1810021B22Rik	2.24719	0.892857	0	0	0	0	1.75439	0	3.73134	0	0	9.52381	1.69492	0
1810022K09Rik	53.9326	44.6429	42.4242	27.4854	41.3793	26.6667	24.7807	29.6875	32.8358	3.7037	21.5385	61.9048	37.2881	8
1810024B03Rik	3.37079	6.25	6.06061	2.33918	3.44828	0.833333	5.48246	3.125	2.98507	0	3.07692	14.2857	6.77966	12
1810026B05Rik	28.0899	25.8929	33.3333	25.731	27.5862	15	32.2368	23.4375	22.3881	25.9259	12.3077	38.0952	27.1186	24
1810026J23Rik	14.6067	6.25	9.09091	7.60234	24.1379	5	10.7456	7.8125	9.70149	0	6.15385	38.0952	13.5593	4
1810027O10Rik	73.0337	90.1786	39.3939	25.731	89.6552	65.8333	59.6491	45.3125	74.6269	18.5185	44.6154	90.4762	88.1356	28
1810029B16Rik	7.86517	6.25	0	2.33918	10.3448	2.5	3.72807	0	3.73134	0	1.53846	9.52381	5.08475	0
1810030J14Rik	0	0	0	0	0	0	0	0	0	0	0	0	0	0
1810030N24Rik	11.236	10.7143	12.1212	8.77193	13.7931	4.16667	5.48246	1.5625	8.20896	0	1.53846	71.4286	13.5593	4
1810030O07Rik	19.1011	21.4286	6.06061	6.43275	13.7931	7.5	11.6228	7.8125	17.1642	3.7037	15.3846	4.7619	15.2542	8
1810031K17Rik	43.8202	38.3929	27.2727	23.9766	24.1379	20	16.6667	42.1875	17.1642	18.5185	15.3846	42.8571	28.8136	12
1810032O08Rik	5.61798	1.78571	6.06061	1.75439	6.89655	4.16667	4.16667	4.6875	5.22388	0	0	0	5.08475	0
1810033B17Rik	65.1685	91.0714	9.09091	2.92398	17.2414	4.16667	1.09649	46.875	2.23881	66.6667	3.07692	9.52381	0	0
1810034E14Rik	5.61798	0.892857	3.0303	2.92398	3.44828	0	0.877193	3.125	1.49254	0	1.53846	4.7619	0	0
1810035I16Rik	0	0	0	0	0	0	0	0	0	0	0	0	0	0
1810035L17Rik	61.7978	48.2143	18.1818	21.0526	58.6207	36.6667	39.693	32.8125	44.7761	7.40741	21.5385	71.4286	55.9322	24
1810037I17Rik	69.6629	92.8571	42.4242	56.7251	93.1034	70	47.5877	78.125	53.7313	44.4444	52.3077	100	74.5763	44
1810041L15Rik	0	0.892857	0	0	0	0.833333	3.07018	0	0	0	0	0	1.69492	0
1810043G02Rik	20.2247	11.6071	15.1515	2.92398	3.44828	6.66667	5.26316	3.125	8.20896	0	7.69231	66.6667	10.1695	8
1810043H04Rik	47.191	53.5714	36.3636	23.3918	48.2759	22.5	28.5088	37.5	39.5522	0	23.0769	90.4762	50.8475	28
1810044D09Rik	1.1236	2.67857	6.06061	2.92398	0	1.66667	0.438596	0	0	0	0	14.2857	3.38983	4
1810046J19Rik	70.7865	76.7857	39.3939	55.5556	48.2759	25	28.5088	45.3125	47.7612	14.8148	10.7692	85.7143	76.2712	12
1810046K07Rik	0	0	12.1212	0	0	0	0	0	0	0	0	0	1.69492	0
1810048J11Rik	5.61798	12.5	3.0303	6.43275	10.3448	3.33333	9.21053	4.6875	8.95522	0	1.53846	66.6667	0	12
1810049H13Rik	10.1124	3.57143	3.0303	1.75439	0	4.16667	5.26316	4.6875	3.73134	0	4.61538	47.619	6.77966	4
1810053B23Rik	0	0	0	0	0	0	0	0	0	0	0	0	0	0
1810055G02Rik	11.236	8.03571	0	0.584795	13.7931	1.66667	14.9123	0	20.1493	0	4.61538	0	1.69492	8
1810058I24Rik	73.0337	58.0357	48.4848	48.538	41.3793	34.1667	44.7368	40.625	47.0149	55.5556	30.7692	71.4286	54.2373	28
1810062G17Rik	0	0	3.0303	0	0	0	3.07018	0	5.97015	0	4.61538	9.52381	6.77966	4
1810062O18Rik	0	0.892857	0	0	0	0.833333	1.53509	0	0.746269	0	0	4.7619	0	0
1810063B05Rik	21.3483	28.5714	15.1515	15.2047	27.5862	12.5	16.6667	15.625	11.194	7.40741	13.8462	57.1429	28.8136	20
1810063B07Rik	23.5955	20.5357	12.1212	12.2807	31.0345	15.8333	15.3509	12.5	17.1642	3.7037	12.3077	23.8095	13.5593	36
1810064F22Rik	0	0	0	0	0	0	0	0	0	0	0	0	5.08475	0
1810065E05Rik	0	0	0	0	0	0	0	0	0	0	0	0	0	0
1810074P20Rik	17.9775	7.14286	9.09091	4.09357	17.2414	6.66667	12.9386	7.8125	13.4328	7.40741	13.8462	14.2857	15.2542	4
2010001E11Rik	0	0	0	0	0	0	0	0	0	0	0	0	0	0
2010001M06Rik	0	0	0	0	0	0.833333	8.11404	0	10.4478	0	1.53846	0	5.08475	16
2010001M09Rik	1.1236	0.892857	72.7273	0	6.89655	0	0	1.5625	0	0	0	23.8095	1.69492	0
2010002M12Rik	0	0	0	0	0	0.833333	0.657895	1.5625	0	3.7037	0	0	0	0
2010002N04Rik	28.0899	9.82143	3.0303	5.26316	0	4.16667	16.6667	14.0625	11.9403	14.8148	7.69231	23.8095	33.8983	4
2010003K11Rik	0	0	0	0	0	0	0	0	0	0	0	0	0	0
2010003K15Rik	0	0	0	0	0	0	0	0	0	0	0	0	0	0
2010003O02Rik	28.0899	27.6786	33.3333	23.3918	24.1379	15.8333	23.4649	21.875	35.0746	7.40741	16.9231	57.1429	49.1525	16
2010005H15Rik	0	2.67857	0	0	0	0	0.219298	0	0	0	0	14.2857	5.08475	0
2010009K17Rik	0	0	0	0	0	0	0	0	0	0	0	0	0	0
2010010A06Rik	0	0	0	0	0	0	0.219298	0	0	0	0	0	0	0
2010011I20Rik	13.4831	5.35714	12.1212	8.77193	31.0345	11.6667	24.7807	12.5	6.71642	11.1111	10.7692	57.1429	23.7288	4
2010012O05Rik	20.2247	10.7143	18.1818	32.7485	13.7931	10	14.693	15.625	14.9254	0	15.3846	38.0952	27.1186	0
2010015L04Rik	0	0	0	0	0	0	0.219298	0	0.746269	0	0	23.8095	0	0
2010016I18Rik	0	0	0	5.26316	0	0	0	0	0	0	0	0	1.69492	0
2010106C02Rik	0	0	0	0	0	0	0	0	0	0	0	0	0	0
2010106E10Rik	0	0	0	0	0	0	0	0	0	0	0	0	0	0
2010106G01Rik	40.4494	52.6786	9.09091	10.5263	37.931	19.1667	16.6667	31.25	25.3731	14.8148	9.23077	38.0952	16.9492	8
2010107E04Rik	95.5056	97.3214	69.697	74.8538	86.2069	60.8333	58.114	87.5	71.6418	22.2222	70.7692	100	88.1356	60
2010107G12Rik	0	0	0	0	0	0	0	0	0.746269	0	0	0	0	0
2010107G23Rik	0	1.78571	0	0.584795	6.89655	1.66667	9.42982	0	1.49254	0	0	23.8095	20.339	0
2010107H07Rik	46.0674	19.6429	30.303	16.3743	10.3448	15	59.6491	23.4375	25.3731	37.037	15.3846	38.0952	25.4237	12
2010109A12Rik	0	0	0	0	0	0	0	0	0	0	0	0	0	0
2010109I03Rik	1.1236	0.892857	0	0	0	0	0	1.5625	0	0	0	9.52381	0	0
2010109K11Rik	16.8539	21.4286	9.09091	12.2807	13.7931	10.8333	8.11404	15.625	13.4328	0	15.3846	9.52381	16.9492	8
2010110P09Rik	0	0	0	0	0	0.833333	0	0	0	0	0	0	0	0
2010111I01Rik	5.61798	8.92857	3.0303	2.92398	17.2414	8.33333	42.3246	1.5625	11.9403	3.7037	21.5385	0	15.2542	28
2010204K13Rik	0	0.892857	3.0303	1.75439	0	0.833333	2.41228	1.5625	2.23881	0	0	76.1905	0	28
2010300C02Rik	0	1.78571	0	0.584795	0	0	0.219298	0	0	0	0	52.381	18.6441	0
2010305A19Rik	10.1124	2.67857	3.0303	1.75439	3.44828	4.16667	6.14035	3.125	7.46269	3.7037	3.07692	14.2857	5.08475	8
2010308F09Rik	0	0	0	0	3.44828	0	0.219298	0	0	0	0	0	0	0
2010310C07Rik	0	0	0	0.584795	0	0	0.657895	0	0	0	0	0	0	0
2010315B03Rik	6.74157	2.67857	6.06061	1.75439	0	2.5	4.16667	4.6875	9.70149	0	4.61538	14.2857	8.47458	0
2010317E24Rik	1.1236	1.78571	0	0	0	0	0	0	0	0	0	0	0	0
2010320M18Rik	4.49438	8.92857	12.1212	5.84795	6.89655	4.16667	8.11404	6.25	7.46269	0	1.53846	57.1429	15.2542	16
2010321M09Rik	11.236	5.35714	3.0303	8.18713	17.2414	5.83333	5.48246	1.5625	7.46269	0	3.07692	9.52381	6.77966	4
2200002D01Rik	3.37079	4.46429	0	1.75439	0	3.33333	2.41228	0	1.49254	3.7037	9.23077	23.8095	25.4237	0
2200002J24Rik	0	0	0	0	0	0	0	0	0	0	0	4.7619	0	0
2200002K05Rik	0	0	0	0	3.44828	0.833333	0	0	0	0	0	4.7619	0	0
2210009G21Rik	3.37079	0.892857	0	1.16959	0	0.833333	0.438596	0	0.746269	0	0	4.7619	1.69492	4
2210010C04Rik	0	0	0	4.09357	0	0	2.85088	1.5625	3.73134	0	3.07692	0	0	0
2210010C17Rik	2.24719	0.892857	0	1.75439	0	0.833333	0.657895	1.5625	1.49254	0	0	33.3333	6.77966	0
2210012G02Rik	12.3596	14.2857	18.1818	3.50877	10.3448	4.16667	7.67544	12.5	5.97015	3.7037	3.07692	9.52381	11.8644	4
2210013O21Rik	29.2135	32.1429	0	8.77193	68.9655	25.8333	18.8596	18.75	29.8507	7.40741	13.8462	33.3333	38.9831	20
2210015D19Rik	11.236	13.3929	6.06061	1.75439	10.3448	6.66667	8.11404	15.625	15.6716	3.7037	7.69231	19.0476	13.5593	0
2210016F16Rik	43.8202	25.8929	18.1818	23.9766	20.6897	12.5	14.693	29.6875	21.6418	7.40741	10.7692	42.8571	30.5085	16
2210016L21Rik	21.3483	14.2857	9.09091	10.5263	27.5862	15	16.886	10.9375	20.1493	0	18.4615	52.381	11.8644	4
2210018M11Rik	11.236	18.75	0	9.35673	10.3448	8.33333	9.86842	6.25	10.4478	3.7037	9.23077	14.2857	20.339	12
2210019I11Rik	0	0	0	0	0	0	0	0	0	0	0	0	0	0
2210020M01Rik	16.8539	3.57143	0	1.16959	0	0.833333	3.50877	1.5625	3.73134	3.7037	0	95.2381	6.77966	0
2210021J22Rik	13.4831	17.8571	9.09091	7.01754	17.2414	10	10.307	4.6875	14.9254	3.7037	9.23077	85.7143	23.7288	4
2210039B01Rik	0	1.78571	0	0	0	0	0	0	0	0	0	4.7619	0	0
2210403K04Rik	26.9663	16.9643	6.06061	2.33918	0	5.83333	27.193	18.75	16.4179	11.1111	10.7692	19.0476	11.8644	4
2210404J11Rik	7.86517	3.57143	3.0303	4.67836	3.44828	0.833333	4.82456	1.5625	5.97015	0	0	0	5.08475	0
2210404O07Rik	7.86517	1.78571	3.0303	3.50877	0	1.66667	0.657895	3.125	3.73134	0	0	9.52381	0	0
2210404O09Rik	3.37079	2.67857	0	1.16959	3.44828	0.833333	0	0	5.97015	0	3.07692	4.7619	1.69492	0
2210407C18Rik	0	0	0	0	0	0	0	0	0	0	0	0	0	0
2210408F21Rik	2.24719	6.25	0	0.584795	0	5	8.55263	9.375	12.6866	3.7037	4.61538	14.2857	10.1695	0
2210408I21Rik	3.37079	0	3.0303	0	3.44828	0.833333	3.07018	0	2.98507	0	1.53846	23.8095	0	4
2210409D07Rik	0	0	0	0	0	0	0.219298	0	0	0	0	0	0	0
2210409E12Rik	0	0	0	0	0	0	0	0	0	0	0	0	0	0
2210411K11Rik	16.8539	48.2143	12.1212	6.43275	17.2414	10.8333	10.0877	4.6875	19.403	3.7037	4.61538	71.4286	66.1017	0
2210414B05Rik	0	0	3.0303	0	0	0	0	0	0	0	0	0	0	0
2210415F13Rik	0	0	0	0	0	0	0	0	0	0	0	0	0	0
2210416O15Rik	0	0	0	1.16959	0	0	0.219298	0	0	0	0	0	0	0
2210417A02Rik	1.1236	0.892857	0	0	0	0	0	0	0	0	0	0	0	0
2210417K05Rik	3.37079	0.892857	0	1.16959	0	0.833333	0.438596	3.125	0	0	1.53846	0	3.38983	0
2210420H20Rik	0	0	0	0	0	0	0	0	0	0	0	0	0	0
2300002M23Rik	0	0	0	0	0	0	0	0	0	0	0	0	0	0
2300003K06Rik	0	0	0	0	0	0	0	0	0	0	0	0	0	0
2300005B03Rik	0	0	0	0	0	0	0	0	0	0	0	33.3333	0	0
2300009A05Rik	20.2247	18.75	3.0303	12.2807	20.6897	10	10.0877	12.5	11.194	3.7037	3.07692	66.6667	15.2542	8
2310001A20Rik	13.4831	21.4286	3.0303	9.94152	27.5862	10	14.0351	10.9375	8.95522	3.7037	9.23077	14.2857	28.8136	12
2310001H17Rik	30.3371	18.75	30.303	18.7135	13.7931	18.3333	5.04386	29.6875	1.49254	66.6667	1.53846	23.8095	1.69492	0
2310001H18Rik	0	0	0	0	0	0	0	0	0	0	0	0	0	0
2310001K24Rik	0	0	0	0	0	0	0.438596	0	0	0	0	0	3.38983	0
2310002D06Rik	0	0	0	0	0	0	0	0	0	0	0	0	0	0
2310002J15Rik	0	0	0	0	0	0	0	0	0	0	0	9.52381	1.69492	0
2310002L09Rik	0	0	0	0	0	0	0	0	0	0	0	0	0	0
2310002L13Rik	0	0	0	0	0	0	0	0	0	0	0	0	0	0
2310003C23Rik	29.2135	27.6786	9.09091	6.43275	24.1379	10	8.11404	20.3125	20.1493	11.1111	7.69231	14.2857	18.6441	4
2310003F16Rik	79.7753	72.3214	60.6061	63.1579	82.7586	56.6667	57.8947	59.375	69.403	14.8148	33.8462	95.2381	69.4915	36
2310003H01Rik	7.86517	7.14286	3.0303	3.50877	13.7931	5	6.14035	3.125	7.46269	0	4.61538	4.7619	13.5593	4
2310003L22Rik	13.4831	8.03571	6.06061	4.67836	10.3448	4.16667	4.16667	1.5625	5.22388	0	6.15385	0	1.69492	4
2310004I24Rik	14.6067	13.3929	12.1212	7.60234	27.5862	5.83333	9.64912	14.0625	11.9403	0	1.53846	47.619	6.77966	12
2310004N24Rik	52.809	11.6071	9.09091	19.883	13.7931	14.1667	12.2807	29.6875	9.70149	0	3.07692	66.6667	44.0678	24
2310005A03Rik	0	0	0	0	0	0	0	1.5625	0	0	0	0	0	0
2310005E17Rik	0	0	0	0	0	0	0	0	0	0	0	0	0	0
2310005G13Rik	0	0	0	0	0	0	0	0	0	0	0	0	0	0
2310007B03Rik	0	0.892857	0	0	0	0	0	0	0.746269	0	0	61.9048	13.5593	0
2310007L24Rik	0	0.892857	0	0	0	0.833333	0.219298	0	0	0	0	95.2381	0	0
2310008H04Rik	12.3596	8.03571	0	5.26316	10.3448	11.6667	7.01754	6.25	5.97015	7.40741	6.15385	14.2857	10.1695	0
2310008H09Rik	20.2247	14.2857	9.09091	9.35673	10.3448	8.33333	14.2544	4.6875	20.1493	7.40741	10.7692	71.4286	30.5085	12
2310008N11Rik	0	0	0	0	0	0	0	0	0	0	0	0	0	0
2310009A05Rik	41.573	29.4643	15.1515	9.35673	37.931	19.1667	14.0351	20.3125	23.1343	7.40741	6.15385	76.1905	32.2034	12
2310009B15Rik	29.2135	9.82143	12.1212	5.84795	17.2414	7.5	11.8421	17.1875	12.6866	3.7037	4.61538	38.0952	25.4237	8
2310010J17Rik	13.4831	1.78571	12.1212	7.01754	3.44828	5.83333	3.72807	3.125	5.22388	18.5185	1.53846	47.619	15.2542	8
2310010M20Rik	0	0	0	0	0	0.833333	0	0	0	0	0	0	0	0
2310011J03Rik	30.3371	29.4643	15.1515	16.9591	62.069	14.1667	25.8772	28.125	26.1194	7.40741	12.3077	61.9048	35.5932	16
2310014F07Rik	2.24719	0	0	0	0	0	0	0	0	0	0	0	0	0
2310014L17Rik	0	0	0	0	0	0	0	0	0	0	0	0	0	0
2310015A10Rik	2.24719	0	0	2.33918	0	0.833333	2.41228	3.125	5.22388	0	0	19.0476	6.77966	4
2310015B20Rik	0	0	0	0	3.44828	0	7.01754	0	4.47761	0	7.69231	0	0	4
2310015D24Rik	0	0	0	0	0	0	0	0	0	0	0	0	0	0
2310016D03Rik	0	0	0	0	0	0	0	0	0	0	0	0	0	0
2310016M24Rik	82.0225	69.6429	51.5152	40.9357	51.7241	30.8333	40.5702	57.8125	56.7164	14.8148	26.1538	100	71.1864	44
2310020H05Rik	0	0	0	0	0	0	0	0	0	0	0	0	0	0
2310021P13Rik	12.3596	21.4286	3.0303	2.92398	10.3448	9.16667	14.2544	9.375	20.8955	0	10.7692	33.3333	22.0339	12
2310022A10Rik	19.1011	17.8571	0	7.01754	0	5.83333	2.85088	7.8125	7.46269	3.7037	3.07692	14.2857	8.47458	16
2310022B05Rik	8.98876	5.35714	0	1.75439	34.4828	7.5	30.4825	7.8125	28.3582	0	13.8462	14.2857	30.5085	0
2310028H24Rik	2.24719	6.25	0	1.75439	31.0345	3.33333	3.50877	1.5625	6.71642	0	3.07692	14.2857	3.38983	12
2310030A07Rik	0	0	0	0	0	0	0	0	0	0	0	0	0	0
2310030G06Rik	0	0	0	0	0	0	1.75439	0	1.49254	3.7037	0	47.619	28.8136	0
2310030N02Rik	5.61798	3.57143	3.0303	1.75439	6.89655	5	2.41228	6.25	4.47761	0	3.07692	19.0476	10.1695	0
2310033E01Rik	0	0	3.0303	0	0	0	0.219298	0	0	0	0	4.7619	0	0
2310033P09Rik	21.3483	14.2857	12.1212	12.2807	20.6897	15	7.89474	7.8125	10.4478	7.40741	3.07692	14.2857	10.1695	8
2310034C09Rik	0	0	0	0	0	0	0	0	0	0	0	0	0	0
2310034G01Rik	0	0	3.0303	0.584795	0	1.66667	0.877193	1.5625	2.98507	0	0	90.4762	5.08475	0
2310034O05Rik	1.1236	0	0	0	0	0	0	0	0	0	0	0	0	0
2310035C23Rik	22.4719	13.3929	6.06061	8.77193	10.3448	4.16667	7.45614	18.75	8.20896	0	3.07692	19.0476	27.1186	8
2310035K24Rik	15.7303	19.6429	0	4.09357	10.3448	5	9.21053	6.25	8.95522	0	3.07692	14.2857	16.9492	0
2310036O22Rik	77.5281	85.7143	63.6364	68.4211	89.6552	57.5	49.1228	62.5	59.7015	40.7407	38.4615	100	77.9661	48
2310037I24Rik	15.7303	7.14286	9.09091	7.01754	6.89655	12.5	12.7193	14.0625	11.194	3.7037	10.7692	14.2857	15.2542	4
2310039H08Rik	22.4719	13.3929	9.09091	7.60234	27.5862	13.3333	17.1053	9.375	19.403	0	4.61538	42.8571	33.8983	4
2310039L15Rik	0	0	0	0	0	0	0.219298	0	0.746269	0	0	0	1.69492	0
2310040G24Rik	13.4831	6.25	3.0303	1.16959	0	0.833333	1.09649	1.5625	0	3.7037	0	23.8095	0	0
2310042D19Rik	0	0	0	0	0	0.833333	0	0	0	0	0	0	0	0
2310042E22Rik	0	0	0	0	0	0	0	0	0	0	0	0	0	0
2310043J07Rik	0	0	0	0	0	0	0.219298	0	0	0	0	0	0	0
2310043L19Rik	0	0	0	0	0	0	0	0	0	0	0	0	0	0
2310043O21Rik	0	0	0	0	0	0	0	0	0	0	0	0	1.69492	0
2310044G17Rik	6.74157	9.82143	6.06061	10.5263	3.44828	3.33333	7.01754	6.25	13.4328	0	4.61538	38.0952	10.1695	0
2310044H10Rik	76.4045	50.8929	33.3333	34.5029	72.4138	48.3333	60.0877	54.6875	64.9254	0	46.1538	57.1429	52.5424	52
2310045N01Rik	26.9663	18.75	9.09091	20.4678	0	7.5	11.1842	23.4375	14.1791	3.7037	10.7692	19.0476	25.4237	0
2310046A06Rik	0	0	0	0	0	0	0	0	0	0	0	0	0	0
2310046O06Rik	11.236	19.6429	3.0303	7.01754	34.4828	5.83333	8.55263	4.6875	11.194	3.7037	13.8462	9.52381	13.5593	4
2310047B19Rik	4.49438	4.46429	3.0303	3.50877	13.7931	3.33333	4.82456	3.125	1.49254	0	0	14.2857	3.38983	4
2310047M10Rik	41.573	20.5357	18.1818	7.60234	20.6897	8.33333	13.3772	21.875	14.1791	29.6296	15.3846	19.0476	20.339	0
2310050B05Rik	0	0	0	0	0	0	0	0	0	0	1.53846	0	0	0
2310050C09Rik	0	0	0	0	0	0	0	0	0	0	0	0	0	0
2310057J18Rik	0	0	0	0	0	0	0	0	0	0	0	0	0	0
2310057M21Rik	2.24719	2.67857	6.06061	1.75439	6.89655	5.83333	5.04386	3.125	2.98507	3.7037	1.53846	0	1.69492	4
2310057N15Rik	0	0	0	0	0	0	0	0	0	0	0	0	0	0
2310061C15Rik	22.4719	37.5	12.1212	14.6199	24.1379	11.6667	13.3772	9.375	17.1642	11.1111	10.7692	19.0476	22.0339	36
2310061I04Rik	13.4831	15.1786	6.06061	8.77193	24.1379	3.33333	7.89474	6.25	9.70149	0	1.53846	52.381	22.0339	4
2310061J03Rik	5.61798	3.57143	3.0303	4.67836	10.3448	2.5	9.86842	6.25	8.20896	0	6.15385	14.2857	5.08475	8
2310061N02Rik	0	0	0	0	0	0	0	0	0	0	0	0	0	0
2310065F04Rik	0	0	0	0	0	0	0	0	0	0	0	0	0	0
2310067B10Rik	8.98876	8.92857	6.06061	2.92398	3.44828	4.16667	3.72807	10.9375	2.98507	0	7.69231	47.619	25.4237	8
2310068J16Rik	2.24719	0	0	0	3.44828	0	1.09649	0	1.49254	0	0	0	1.69492	0
2310069B03Rik	0	0	0	0	0	0	0	0	0	0	0	0	0	0
2310069G16Rik	0	0	0	0	0	0	0	0	0	0	0	0	0	0
2310079F23Rik	3.37079	3.57143	3.0303	1.75439	6.89655	1.66667	2.41228	1.5625	5.22388	3.7037	1.53846	4.7619	1.69492	4
2310079G19Rik	0	0	0	0	0	0	0	0	0	0	0	0	0	0
2310081J21Rik	0	0	0	0	0	0	0	0	0	0	6.15385	0	0	0
2400001E08Rik	79.7753	75.8929	24.2424	36.8421	68.9655	40.8333	30.9211	60.9375	46.2687	29.6296	20	66.6667	52.5424	44
2400003C14Rik	29.2135	36.6071	9.09091	10.5263	10.3448	13.3333	14.9123	21.875	23.1343	7.40741	6.15385	57.1429	18.6441	8
2400009B08Rik	19.1011	56.25	0	0.584795	3.44828	0.833333	2.63158	0	2.98507	0	0	9.52381	5.08475	4
2410001C21Rik	62.9213	39.2857	21.2121	22.807	34.4828	23.3333	20.1754	34.375	27.6119	14.8148	10.7692	47.619	22.0339	8
2410002F23Rik	10.1124	6.25	18.1818	4.67836	27.5862	5	10.7456	4.6875	17.1642	0	9.23077	4.7619	3.38983	4
2410002I01Rik	8.98876	5.35714	3.0303	2.92398	3.44828	2.5	0.877193	3.125	5.22388	3.7037	3.07692	14.2857	0	0
2410002O22Rik	19.1011	21.4286	12.1212	15.7895	27.5862	10	13.8158	18.75	17.1642	0	9.23077	33.3333	16.9492	16
2410003K15Rik	33.7079	13.3929	6.06061	7.60234	20.6897	12.5	17.1053	9.375	20.1493	0	10.7692	28.5714	20.339	24
2410003L11Rik	0	0	0	0	0	0	0	0	0	0	0	0	0	0
2410004A20Rik	0	0	0	0.584795	0	0	0	0	0	0	0	0	1.69492	0
2410004B18Rik	16.8539	13.3929	9.09091	12.2807	20.6897	9.16667	13.8158	20.3125	19.403	0	16.9231	28.5714	10.1695	8
2410004I01Rik	0	0	0	0	0	0	0.219298	0	0.746269	0	0	0	1.69492	0
2410004N09Rik	26.9663	12.5	18.1818	10.5263	6.89655	11.6667	11.4035	6.25	10.4478	0	10.7692	9.52381	22.0339	4
2410004P03Rik	3.37079	3.57143	0	0.584795	0	0.833333	1.31579	0	1.49254	0	0	100	1.69492	0
2410006H16Rik	89.8876	73.2143	75.7576	43.2749	55.1724	32.5	41.2281	57.8125	50.7463	48.1481	38.4615	33.3333	49.1525	48
2410007B07Rik	0	0	3.0303	0	0	0	0	0	0	0	0	0	0	0
2410012E07Rik	0	0	0	0	0	0	0	0	0	0	0	0	0	0
2410012M07Rik	0	0	0	0	0	0	0	0	0	0	0	0	0	0
2410015M20Rik	70.7865	53.5714	57.5758	54.9708	65.5172	35	42.3246	46.875	52.9851	14.8148	29.2308	90.4762	59.322	28
2410016O06Rik	7.86517	7.14286	9.09091	4.09357	34.4828	29.1667	4.16667	7.8125	1.49254	0	6.15385	0	5.08475	4
2410017I17Rik	0	0	0	0	0	0	0	0	0	0	0	0	0	0
2410017P09Rik	35.9551	21.4286	9.09091	8.18713	24.1379	13.3333	10.7456	14.0625	16.4179	18.5185	9.23077	52.381	38.9831	0
2410018L13Rik	0	0	0	0	0	0	0	0	0.746269	0	0	0	0	0
2410018M08Rik	2.24719	1.78571	0	0.584795	6.89655	4.16667	0	4.6875	2.23881	0	0	9.52381	0	4
2410021H03Rik	0	0	0	0	0	0	0	0	0	0	0	0	0	0
2410022L05Rik	10.1124	15.1786	0	0.584795	13.7931	6.66667	4.82456	4.6875	6.71642	0	0	42.8571	13.5593	4
2410042D21Rik	7.86517	8.03571	6.06061	2.33918	3.44828	5	6.79825	9.375	8.95522	3.7037	4.61538	28.5714	13.5593	4
2410057H14Rik	0	0	0	0	0	0	0	0	0	0	1.53846	0	0	0
2410066E13Rik	0	0	6.06061	1.16959	0	0	1.97368	0	0	0	0	4.7619	0	0
2410075B13Rik	1.1236	0.892857	0	2.33918	3.44828	3.33333	0.657895	3.125	2.23881	0	1.53846	19.0476	3.38983	4
2410076I21Rik	0	0.892857	3.0303	0	0	0	0.219298	0	0	0	0	0	0	0
2410088K16Rik	0	0	0	0	0	0	0	0	0	0	0	0	0	0
2410089E03Rik	4.49438	1.78571	3.0303	4.67836	10.3448	1.66667	7.01754	0	12.6866	0	12.3077	47.619	6.77966	4
2410091C18Rik	22.4719	3.57143	3.0303	7.01754	17.2414	11.6667	7.45614	7.8125	8.95522	0	4.61538	33.3333	3.38983	16
2410114N07Rik	0	0	0	0	0	0	0	0	0	0	0	0	0	0
2410124H12Rik	0	0	0	0	0	0	0	0	0	0	0	0	0	0
2410127L17Rik	29.2135	18.75	6.06061	14.0351	13.7931	7.5	12.0614	10.9375	18.6567	0	13.8462	38.0952	22.0339	4
2410131K14Rik	2.24719	2.67857	3.0303	1.16959	3.44828	0.833333	2.41228	1.5625	0.746269	0	1.53846	0	0	0
2410137F16Rik	0	0	0	0	0	0	0	0	0	0	0	0	0	0
2410137M14Rik	1.1236	0	0	0	0	0	0	0	0	0	0	0	0	0
2410141K09Rik	0	0	0	0	0	0	0	0	0	0	0	0	0	0
2500003M10Rik	38.2022	33.0357	21.2121	27.4854	51.7241	24.1667	31.1404	20.3125	27.6119	11.1111	26.1538	71.4286	40.678	16
2500004C02Rik	1.1236	0.892857	0	0	3.44828	1.66667	1.53509	0	1.49254	3.7037	0	19.0476	1.69492	0
2510002D24Rik	13.4831	16.0714	21.2121	15.7895	13.7931	19.1667	12.7193	9.375	11.9403	0	6.15385	61.9048	27.1186	8
2510003D18Rik	0	0	0	0	0	0	0.219298	0	0	0	0	0	0	0
2510003E04Rik	16.8539	16.9643	0	4.09357	27.5862	11.6667	12.5	9.375	7.46269	3.7037	12.3077	61.9048	20.339	20
2510006D16Rik	53.9326	38.3929	30.303	33.9181	55.1724	34.1667	32.8947	37.5	36.5672	25.9259	21.5385	61.9048	30.5085	32
2510009E07Rik	7.86517	9.82143	0	0	13.7931	15	12.0614	1.5625	17.9104	0	21.5385	19.0476	25.4237	4
2510012J08Rik	24.7191	6.25	9.09091	9.35673	20.6897	11.6667	9.64912	10.9375	13.4328	0	7.69231	33.3333	13.5593	4
2510039O18Rik	31.4607	41.0714	24.2424	21.0526	31.0345	13.3333	15.3509	18.75	14.9254	0	6.15385	61.9048	35.5932	8
2510049J12Rik	0	0.892857	0	0	0	0	0	0	0	0	0	4.7619	0	0
2600006L11Rik	1.1236	0	0	0	6.89655	0.833333	0.219298	0	0	0	0	0	0	0
2610001J05Rik	51.6854	55.3571	30.303	34.5029	58.6207	35.8333	41.2281	37.5	53.7313	18.5185	33.8462	66.6667	50.8475	24
2610002D18Rik	0	0	0	0	0	0	0	0	0	0	0	0	0	0
2610002I17Rik	1.1236	4.46429	0	3.50877	0	3.33333	2.19298	1.5625	4.47761	0	1.53846	4.7619	1.69492	4
2610002J02Rik	28.0899	14.2857	21.2121	14.6199	17.2414	22.5	21.2719	15.625	17.9104	3.7037	26.1538	42.8571	25.4237	24
2610002M06Rik	12.3596	10.7143	6.06061	9.94152	6.89655	5.83333	6.57895	12.5	10.4478	0	7.69231	23.8095	11.8644	4
2610005L07Rik	20.2247	14.2857	15.1515	18.1287	27.5862	21.6667	28.2895	17.1875	20.8955	7.40741	16.9231	57.1429	16.9492	40
2610008E11Rik	0	3.57143	6.06061	1.16959	10.3448	7.5	5.92105	1.5625	7.46269	0	7.69231	0	6.77966	8
2610015P09Rik	5.61798	1.78571	6.06061	3.50877	3.44828	5.83333	3.94737	3.125	3.73134	0	0	66.6667	10.1695	0
2610016A17Rik	0	0	0	0	0	0	0	0	0	0	0	19.0476	0	0
2610017I09Rik	0	0	0	0	0	0	0.219298	0	1.49254	0	0	0	0	0
2610018G03Rik	0	0	0	2.92398	0	0	0	1.5625	0.746269	0	0	0	1.69492	0
2610019E17Rik	6.74157	4.46429	9.09091	2.92398	3.44828	1.66667	4.16667	1.5625	4.47761	0	3.07692	4.7619	20.339	0
2610019F03Rik	0	1.78571	0	2.33918	31.0345	6.66667	1.97368	1.5625	2.23881	0	0	9.52381	3.38983	0
2610020C07Rik	2.24719	1.78571	0	0	0	0.833333	0	1.5625	0	0	1.53846	0	0	0
2610020H08Rik	0	3.57143	3.0303	2.33918	0	0	1.31579	0	0	0	0	0	0	0
2610021K21Rik	1.1236	1.78571	3.0303	0	0	0	0.219298	0	0	0	0	14.2857	0	0
2610027L16Rik	26.9663	17.8571	6.06061	9.94152	10.3448	5.83333	7.45614	17.1875	6.71642	0	1.53846	19.0476	1.69492	0
2610028E06Rik	0	0	0	0	0	0	0	0	0	0	0	0	0	0
2610028H24Rik	1.1236	1.78571	0	1.16959	3.44828	2.5	0.438596	0	0.746269	0	1.53846	90.4762	32.2034	4
2610029G23Rik	28.0899	25.8929	21.2121	10.5263	17.2414	15	9.86842	15.625	19.403	3.7037	4.61538	28.5714	11.8644	0
2610029I01Rik	17.9775	8.03571	3.0303	4.67836	13.7931	6.66667	2.41228	21.875	2.98507	0	0	0	5.08475	0
2610034B18Rik	5.61798	6.25	0	0	10.3448	4.16667	8.33333	1.5625	12.6866	0	7.69231	47.619	6.77966	8
2610034M16Rik	0	0	0	0	0	0	0.219298	0	0	0	0	0	0	0
2610035D17Rik	8.98876	1.78571	15.1515	4.09357	6.89655	0.833333	2.63158	6.25	6.71642	0	1.53846	28.5714	5.08475	8
2610035F20Rik	0	0	0	0	0	0	0	0	0	0	0	0	0	0
2610037D02Rik	0	0	3.0303	0	0	0	0	0	0	0	0	0	0	0
2610039C10Rik	16.8539	12.5	3.0303	15.2047	34.4828	12.5	5.04386	10.9375	5.97015	3.7037	3.07692	0	6.77966	4
2610044O15Rik	4.49438	1.78571	3.0303	4.09357	13.7931	2.5	6.14035	1.5625	5.97015	0	3.07692	9.52381	3.38983	4
2610100L16Rik	0	0	0	0	0	0	0	0	0	0	0	0	0	0
2610101N10Rik	42.6966	35.7143	30.303	25.731	37.931	21.6667	23.4649	25	22.3881	0	13.8462	61.9048	28.8136	28
2610109H07Rik	0	0	0	0	0	0	0	0	0.746269	0	0	0	0	0
2610203C20Rik	0	0	0	0	0	0.833333	5.48246	0	11.9403	0	6.15385	0	0	0
2610203C22Rik	3.37079	0	0	0.584795	27.5862	3.33333	0	0	1.49254	0	1.53846	0	0	0
2610204G22Rik	1.1236	0.892857	0	0	0	0.833333	1.75439	0	2.23881	0	0	9.52381	3.38983	0
2610206C17Rik	0	0	0	0	0	0	0	0	0	0	0	0	0	0
2610301B20Rik	4.49438	3.57143	0	0.584795	10.3448	4.16667	3.50877	1.5625	5.22388	0	4.61538	33.3333	8.47458	8
2610301G19Rik	10.1124	6.25	15.1515	5.26316	10.3448	7.5	5.70175	4.6875	3.73134	0	10.7692	28.5714	11.8644	4
2610305D13Rik	0	0	0	0	17.2414	8.33333	2.63158	0	1.49254	7.40741	1.53846	0	0	0
2610306M01Rik	2.24719	0.892857	3.0303	2.33918	3.44828	3.33333	3.07018	0	5.22388	0	3.07692	61.9048	10.1695	0
2610307P16Rik	0	0	0	0	0	4.16667	5.04386	0	2.23881	0	3.07692	4.7619	3.38983	0
2610316D01Rik	0	0	0	0	0	0	0	0	0	0	0	0	0	0
2610318N02Rik	1.1236	0.892857	0	0	0	0.833333	0	0	0	0	0	0	0	0
2610507B11Rik	19.1011	28.5714	0	7.60234	13.7931	10	10.5263	17.1875	11.9403	3.7037	6.15385	28.5714	54.2373	12
2610507I01Rik	6.74157	6.25	3.0303	1.16959	3.44828	18.3333	8.11404	1.5625	0.746269	0	4.61538	4.7619	13.5593	0
2610524H06Rik	11.236	3.57143	0	4.67836	6.89655	0.833333	5.26316	9.375	11.9403	0	1.53846	4.7619	3.38983	8
2610528A11Rik	0	0.892857	0	0	0	0	0	1.5625	0	0	0	0	0	0
2610528E23Rik	4.49438	2.67857	3.0303	1.16959	27.5862	6.66667	6.79825	0	3.73134	0	6.15385	28.5714	5.08475	20
2610528J11Rik	0	0.892857	0	0.584795	0	0	0.657895	0	0.746269	0	1.53846	85.7143	20.339	0
2700007P21Rik	7.86517	8.03571	3.0303	3.50877	17.2414	5	8.77193	3.125	15.6716	0	9.23077	9.52381	10.1695	16
2700023E23Rik	4.49438	1.78571	6.06061	7.01754	0	0.833333	12.7193	1.5625	11.9403	3.7037	7.69231	14.2857	20.339	16
2700029M09Rik	21.3483	27.6786	21.2121	19.883	24.1379	17.5	11.1842	12.5	17.1642	11.1111	9.23077	47.619	20.339	8
2700038G22Rik	4.49438	1.78571	12.1212	1.16959	3.44828	1.66667	2.41228	1.5625	2.23881	0	0	9.52381	3.38983	0
2700046A07Rik	0	0	0	0	3.44828	0.833333	0	0	0.746269	0	1.53846	0	0	0
2700046G09Rik	0	0.892857	0	0	0	0	2.19298	0	1.49254	0	0	14.2857	5.08475	0
2700049A03Rik	3.37079	3.57143	0	1.16959	6.89655	4.16667	3.28947	0	3.73134	0	4.61538	19.0476	0	0
2700050L05Rik	5.61798	4.46429	3.0303	1.75439	10.3448	0	1.75439	6.25	3.73134	0	3.07692	9.52381	3.38983	4
2700054A10Rik	0	0	0	0	10.3448	0.833333	0.438596	1.5625	0.746269	0	0	4.7619	0	0
2700060E02Rik	91.0112	75.8929	60.6061	50.8772	72.4138	54.1667	48.6842	64.0625	50.7463	14.8148	47.6923	66.6667	62.7119	28
2700062C07Rik	10.1124	6.25	6.06061	5.84795	6.89655	8.33333	12.7193	3.125	10.4478	3.7037	7.69231	14.2857	11.8644	8
2700069I18Rik	0	0	0	0	0	0	0	0	0	0	0	0	0	0
2700070H01Rik	0	0	0	0	0	0	0.219298	0	0	0	0	0	0	0
2700078E11Rik	13.4831	25	3.0303	12.2807	17.2414	13.3333	7.01754	15.625	11.194	0	4.61538	28.5714	15.2542	8
2700081L22Rik	0	0	0	0	0	0	0	0	0	0	0	4.7619	0	0
2700081O15Rik	1.1236	1.78571	0	0	6.89655	2.5	8.99123	1.5625	14.1791	3.7037	10.7692	33.3333	1.69492	0
2700086A05Rik	0	0	0	0	0	0	0.877193	0	0	0	0	0	0	4
2700089E24Rik	25.8427	31.25	15.1515	6.43275	55.1724	35	31.1404	7.8125	47.7612	7.40741	27.6923	38.0952	40.678	32
2700089I24Rik	0	0	0	0	0	0	0	0	0	0	0	0	0	0
2700090O03Rik	0	0	0	0	0	0	0	0	0	0	0	0	0	0
2700094K13Rik	49.4382	37.5	33.3333	31.5789	17.2414	15	17.5439	28.125	19.403	7.40741	15.3846	66.6667	59.322	28
2700097O09Rik	2.24719	3.57143	0	2.33918	13.7931	4.16667	3.28947	0	2.98507	0	7.69231	14.2857	8.47458	4
2700099C18Rik	0	1.78571	0	1.75439	0	0	0	0	0	0	0	0	0	0
2810001G20Rik	6.74157	5.35714	12.1212	14.0351	10.3448	10.8333	6.14035	1.5625	7.46269	3.7037	3.07692	33.3333	15.2542	8
2810002D19Rik	5.61798	1.78571	3.0303	4.67836	17.2414	5	6.79825	4.6875	4.47761	7.40741	4.61538	4.7619	1.69492	8
2810002N01Rik	49.4382	22.3214	6.06061	18.1287	41.3793	18.3333	21.2719	9.375	23.1343	0	9.23077	66.6667	23.7288	12
2810004N23Rik	13.4831	17.8571	15.1515	8.18713	6.89655	5	13.1579	4.6875	17.1642	0	4.61538	33.3333	27.1186	8
2810006K23Rik	6.74157	7.14286	0	7.01754	3.44828	4.16667	4.60526	3.125	4.47761	0	7.69231	14.2857	10.1695	8
2810007J24Rik	0	0	0	0	0	0.833333	0	0	0	0	0	0	0	0
2810008D09Rik	23.5955	19.6429	33.3333	13.4503	17.2414	16.6667	22.807	21.875	18.6567	0	10.7692	42.8571	22.0339	24
2810008M24Rik	52.809	25.8929	9.09091	21.6374	58.6207	31.6667	33.3333	18.75	32.8358	3.7037	30.7692	47.619	27.1186	12
2810011L19Rik	0	0	0	0	0	0	0	0	0	0	0	0	0	0
2810013P06Rik	16.8539	8.03571	21.2121	16.9591	20.6897	5.83333	16.2281	9.375	8.20896	7.40741	4.61538	47.619	11.8644	16
2810021B07Rik	38.2022	15.1786	30.303	24.5614	20.6897	20	14.2544	23.4375	17.9104	11.1111	9.23077	47.619	11.8644	8
2810021J22Rik	1.1236	2.67857	0	2.92398	0	0.833333	1.97368	1.5625	2.23881	0	3.07692	0	3.38983	0
2810025M15Rik	14.6067	17.8571	9.09091	2.92398	89.6552	49.1667	5.70175	7.8125	11.9403	11.1111	9.23077	4.7619	0	12
2810029C07Rik	1.1236	0	0	0	0	0	0.219298	0	0.746269	3.7037	0	14.2857	0	0
2810030E01Rik	0	0	0	0	3.44828	1.66667	1.31579	0	1.49254	0	1.53846	4.7619	0	4
2810032G03Rik	0	0	0	0	0	0	0	0	0.746269	0	0	0	0	0
2810046L04Rik	7.86517	4.46429	3.0303	4.09357	3.44828	3.33333	3.72807	7.8125	5.97015	3.7037	0	23.8095	10.1695	4
2810047C21Rik1	0	0.892857	0	0	0	0	0.438596	0	0	0	0	4.7619	0	0
2810049E08Rik	0	0	0	0	0	0	0	0	0	0	0	0	0	0
2810055F11Rik	1.1236	0.892857	0	0	3.44828	3.33333	8.77193	0	15.6716	0	7.69231	0	1.69492	0
2810055G20Rik	1.1236	0	0	0.584795	0	1.66667	14.9123	0	12.6866	0	6.15385	0	5.08475	0
2810403A07Rik	10.1124	16.0714	6.06061	8.18713	3.44828	8.33333	11.6228	7.8125	14.1791	0	6.15385	33.3333	22.0339	8
2810403D21Rik	1.1236	0.892857	3.0303	0.584795	0	0	1.09649	1.5625	2.98507	0	0	14.2857	1.69492	0
2810404M03Rik	0	0	0	0	0	0	0	0	0	0	0	0	0	0
2810405F15Rik	0	0	0	0	0	0.833333	0	0	0	0	0	0	0	0
2810405K02Rik	6.74157	2.67857	3.0303	1.16959	17.2414	10.8333	7.89474	3.125	11.9403	0	10.7692	9.52381	8.47458	12
2810407C02Rik	68.5393	64.2857	42.4242	35.0877	79.3103	41.6667	52.193	56.25	52.2388	11.1111	43.0769	85.7143	59.322	40
2810408A11Rik	1.1236	2.67857	0	0	0	0	0.438596	0	0	0	0	0	0	0
2810408I11Rik	0	0.892857	0	0.584795	0	0.833333	0	0	0	0	0	0	0	0
2810408M09Rik	10.1124	6.25	6.06061	9.94152	13.7931	10.8333	8.99123	4.6875	14.1791	0	6.15385	28.5714	16.9492	12
2810410L24Rik	0	0	0	0	0	0	0.657895	0	0	0	1.53846	4.7619	0	0
2810417H13Rik	3.37079	10.7143	3.0303	1.16959	3.44828	1.66667	2.41228	1.5625	3.73134	0	0	0	5.08475	0
2810422J05Rik	65.1685	36.6071	39.3939	26.3158	34.4828	15.8333	13.5965	31.25	28.3582	11.1111	16.9231	52.381	30.5085	12
2810422O20Rik	1.1236	4.46429	3.0303	0.584795	0	2.5	3.07018	0	0.746269	0	0	0	1.69492	0
2810428I15Rik	61.7978	59.8214	21.2121	26.9006	72.4138	39.1667	42.7632	31.25	50.7463	7.40741	26.1538	66.6667	55.9322	28
2810429I04Rik	1.1236	0	0	0	0	0	0	0	0	0	0	0	0	0
2810432D09Rik	31.4607	16.9643	15.1515	12.2807	24.1379	19.1667	25.2193	10.9375	26.1194	11.1111	29.2308	38.0952	25.4237	12
2810432L12Rik	2.24719	0.892857	0	0	51.7241	9.16667	8.77193	0	8.95522	0	7.69231	47.619	16.9492	4
2810433D01Rik	0	0	0	0	0	0	4.16667	0	6.71642	0	0	0	0	0
2810442I21Rik	0	0	0	0	0	0	0	0	0	0	0	0	0	0
2810442N19Rik	1.1236	0	0	0	0	0	1.09649	0	0	0	3.07692	0	0	0
2810453I06Rik	19.1011	14.2857	9.09091	11.1111	20.6897	12.5	17.3246	9.375	27.6119	7.40741	13.8462	23.8095	13.5593	12
2810454H06Rik	3.37079	0.892857	3.0303	1.75439	0	1.66667	1.53509	0	0.746269	0	3.07692	0	3.38983	4
2810459M11Rik	0	0	0	0	0	0	0	0	0	0	0	0	0	0
2810468N07Rik	2.24719	0	0	0	0	0	0.438596	0	5.22388	0	1.53846	0	0	0
2810471M01Rik	0	0	0	0	0	0	0	0	0	0	0	0	0	0
2810474O19Rik	40.4494	25.8929	30.303	26.9006	27.5862	15.8333	27.6316	29.6875	28.3582	40.7407	9.23077	76.1905	35.5932	4
2900002K06Rik	0	0	0	0	0	0.833333	0	0	0	0	0	0	0	0
2900005J15Rik	4.49438	1.78571	3.0303	2.92398	0	0	13.1579	4.6875	4.47761	3.7037	4.61538	14.2857	6.77966	0
2900006K08Rik	0	0	0	0	0	0	0.219298	0	0	0	0	71.4286	3.38983	0
2900008C10Rik	3.37079	2.67857	12.1212	0.584795	3.44828	1.66667	2.41228	0	1.49254	7.40741	0	0	5.08475	4
2900009J06Rik	0	0	0	0	0	0	0.877193	0	2.98507	0	1.53846	4.7619	3.38983	0
2900010M23Rik	70.7865	47.3214	45.4545	35.6725	68.9655	45	40.7895	56.25	52.2388	11.1111	24.6154	85.7143	74.5763	8
2900011O08Rik	0	0	0	0	0	0	0	0	0	0	0	0	0	0
2900026A02Rik	2.24719	0.892857	0	2.33918	44.8276	21.6667	2.19298	3.125	18.6567	0	3.07692	38.0952	10.1695	0
2900041M22Rik	0	0	3.0303	3.50877	3.44828	1.66667	0.877193	0	2.23881	0	3.07692	4.7619	1.69492	0
2900052N01Rik	0	0	0	0	0	0	0	0	0	0	0	0	0	0
2900053A13Rik	74.1573	66.0714	33.3333	33.9181	31.0345	30.8333	28.2895	53.125	36.5672	51.8519	16.9231	71.4286	59.322	20
2900055J20Rik	0	0	0	0	0	0	0	0	0	0	6.15385	0	0	0
2900056M20Rik	4.49438	7.14286	6.06061	3.50877	3.44828	1.66667	3.07018	3.125	2.98507	0	1.53846	4.7619	1.69492	0
2900057B20Rik	0	0	0	0	0	0	0	0	0	0	0	0	0	0
2900060B14Rik	4.49438	4.46429	3.0303	1.75439	3.44828	1.66667	4.38596	0	3.73134	0	1.53846	0	1.69492	4
2900064A13Rik	60.6742	64.2857	27.2727	25.1462	82.7586	31.6667	47.1491	46.875	47.0149	18.5185	38.4615	57.1429	50.8475	48
2900076A07Rik	2.24719	2.67857	0	1.75439	6.89655	2.5	7.67544	1.5625	2.23881	0	1.53846	19.0476	6.77966	4
2900079G21Rik	0	0	0	0	0	0	0	0	0	0	0	0	0	0
2900092C05Rik	0	0	0	0	0	0	0	0	0	0	0	0	0	0
2900092D14Rik	1.1236	0	0	0	0	0	0	0	0	0	0	0	0	0
2900092E17Rik	46.0674	23.2143	12.1212	19.883	31.0345	20	24.3421	17.1875	17.9104	3.7037	20	52.381	27.1186	20
2900093L17Rik	0	0	0	0	0	0	0	0	0	0	0	0	0	0
2900097C17Rik	42.6966	56.25	12.1212	22.807	24.1379	19.1667	33.3333	26.5625	49.2537	14.8148	24.6154	61.9048	59.322	8
3000002C10Rik	2.24719	2.67857	0	0	0	0	1.31579	3.125	0.746269	0	1.53846	4.7619	3.38983	4
3010001F23Rik	0	0	0	0	0	0	0.657895	0	1.49254	0	0	0	0	4
3010026O09Rik	1.1236	0	0	0.584795	3.44828	2.5	2.85088	1.5625	1.49254	0	1.53846	23.8095	1.69492	0
3100003L05Rik	0	0	0	0	0	0	0	0	0	0	0	0	0	0
3110001D03Rik	50.5618	24.1071	45.4545	22.807	48.2759	15.8333	31.3596	25	37.3134	11.1111	16.9231	57.1429	20.339	8
3110001I22Rik	2.24719	2.67857	0	1.75439	0	0	0.877193	3.125	0	0	0	0	1.69492	0
3110002H16Rik	8.98876	10.7143	6.06061	6.43275	13.7931	10.8333	4.16667	7.8125	1.49254	3.7037	1.53846	14.2857	10.1695	4
3110003A17Rik	86.5169	93.75	57.5758	77.193	37.931	55	41.2281	76.5625	44.7761	25.9259	10.7692	42.8571	54.2373	24
3110007F17Rik	2.24719	2.67857	0	0.584795	0	1.66667	2.41228	0	1.49254	0	4.61538	0	1.69492	0
3110009E18Rik	7.86517	3.57143	0	5.84795	6.89655	0.833333	6.57895	4.6875	5.22388	0	3.07692	14.2857	6.77966	0
3110009F21Rik	0	0	0	0	0	0	0	0	0	0	0	0	0	0
3110015C05Rik	0	0	0	0	0	0	0	0	0	0	0	0	0	0
3110021A11Rik	0	0	0	0	0	0.833333	1.97368	0	0.746269	0	0	4.7619	0	0
3110021N24Rik	0	0	3.0303	0.584795	0	2.5	7.89474	6.25	2.98507	0	3.07692	14.2857	1.69492	0
3110035E14Rik	0	0	0	0	0	0	0	0	0.746269	0	0	0	0	0
3110039I08Rik	0	0	0	0	0	0	0	0	0	0	0	0	0	0
3110039M20Rik	0	0	0	0	0	0	0	0	1.49254	0	0	0	0	0
3110040N11Rik	14.6067	9.82143	9.09091	11.6959	20.6897	7.5	10.307	10.9375	17.1642	3.7037	9.23077	38.0952	27.1186	0
3110043O21Rik	7.86517	18.75	6.06061	1.16959	3.44828	3.33333	2.63158	10.9375	3.73134	7.40741	1.53846	4.7619	3.38983	8
3110045C21Rik	1.1236	0	3.0303	0.584795	3.44828	0.833333	1.09649	1.5625	0	0	1.53846	0	0	0
3110047P20Rik	0	0	0	0	0	0	0	0	0	0	0	0	0	0
3110052M02Rik	3.37079	2.67857	6.06061	2.92398	0	2.5	5.92105	1.5625	4.47761	0	4.61538	0	10.1695	0
3110056K07Rik	5.61798	1.78571	3.0303	6.43275	3.44828	1.66667	4.60526	4.6875	2.23881	3.7037	3.07692	4.7619	10.1695	16
3110056O03Rik	12.3596	5.35714	6.06061	10.5263	3.44828	3.33333	6.35965	1.5625	5.97015	3.7037	3.07692	38.0952	15.2542	0
3110057O12Rik	0	1.78571	3.0303	1.16959	0	0.833333	1.31579	0	0.746269	0	0	0	0	0
3110062M04Rik	15.7303	7.14286	6.06061	5.84795	55.1724	17.5	9.64912	7.8125	8.20896	3.7037	9.23077	61.9048	23.7288	16
3110070M22Rik	1.1236	0	3.0303	0.584795	0	0	1.31579	1.5625	0	0	0	4.7619	0	0
3110079O15Rik	0	0	0	0.584795	0	0	0.219298	0	0.746269	0	0	0	0	0
3110082D06Rik	0	0	0	0	0	0	0	0	0	0	0	0	0	0
3110082I17Rik	20.2247	8.92857	6.06061	0	3.44828	5	7.23684	31.25	6.71642	7.40741	7.69231	33.3333	13.5593	4
3110082J24Rik	0	0	0	0	0	0	0	0	0	0	0	0	0	0
3110099E03Rik	0	0	0	0	0	0	0	0	0	0	0	0	0	0
3200001D21Rik	0	0	0	0	0	0	0	0	0	0	0	0	0	0
3200002M19Rik	13.4831	19.6429	18.1818	5.84795	0	3.33333	1.09649	15.625	2.98507	3.7037	0	9.52381	6.77966	4
3230401D17Rik	46.0674	26.7857	15.1515	18.1287	41.3793	24.1667	17.3246	34.375	23.8806	11.1111	13.8462	38.0952	16.9492	20
3300002I08Rik	0	0.892857	0	0	0	0	0.219298	0	0	0	0	0	0	0
3300005D01Rik	0	0.892857	0	0	0	0	0.219298	0	0	0	1.53846	0	0	0
3425401B19Rik	0	0	0	0	0	0	0.438596	0	0	0	0	0	0	0
3632451O06Rik	0	0	0	0	3.44828	0	3.28947	0	14.1791	0	0	0	0	0
3632454L22Rik	0	0	0	0	0	0	0	0	0	0	0	0	0	0
3830403N18Rik	1.1236	0	0	1.75439	0	0	0.438596	1.5625	0	0	3.07692	0	1.69492	4
3830406C13Rik	35.9551	19.6429	18.1818	14.0351	34.4828	11.6667	15.5702	21.875	19.403	0	10.7692	47.619	15.2542	12
3830408C21Rik	0	0	0	0	0	0	0.438596	0	0	0	0	0	0	0
3830417A13Rik	0	0	0	0	0	0	0	0	0	0	0	0	0	0
3830431G21Rik	2.24719	0.892857	0	0	0	0	0.438596	0	0	0	0	9.52381	27.1186	0
3930402G23Rik	0	0	0	0	0	0	0.438596	0	0	0	0	0	5.08475	0
4430402I18Rik	0	0	0	0.584795	0	3.33333	2.63158	0	2.98507	0	0	66.6667	0	0
4632411B12Rik	16.8539	10.7143	6.06061	6.43275	17.2414	8.33333	6.14035	3.125	3.73134	3.7037	6.15385	14.2857	5.08475	0
4632415K11Rik	1.1236	0	3.0303	0	0	0	0.219298	0	0	0	0	4.7619	0	0
4632415L05Rik	1.1236	1.78571	3.0303	2.33918	0	3.33333	7.45614	0	6.71642	3.7037	1.53846	4.7619	3.38983	4
4632427E13Rik	0	0	0	0.584795	0	0	1.09649	0	2.23881	0	0	9.52381	0	0
4632428C04Rik	0	0	0	0	0	0	0.219298	6.25	0	0	0	28.5714	0	0
4632428N05Rik	87.6404	44.6429	18.1818	30.4094	58.6207	34.1667	19.9561	79.6875	28.3582	48.1481	9.23077	4.7619	1.69492	0
4632434I11Rik	0	2.67857	0	0	0	0	0	0	0	0	0	0	0	0
4732415M23Rik	0	0	0	0	3.44828	0	1.09649	0	0	0	0	61.9048	0	0
4732416N19Rik	0	0	0	0	0	0	0	0	0	0	0	0	0	0
4732418C07Rik	15.7303	27.6786	21.2121	11.6959	24.1379	20.8333	24.1228	6.25	29.1045	3.7037	16.9231	38.0952	37.2881	12
4732456N10Rik	0	0	0	0	0	0	0	0	0	0	0	0	0	0
4732471D19Rik	3.37079	2.67857	6.06061	1.75439	0	4.16667	3.28947	0	3.73134	0	1.53846	0	1.69492	0
4732471J01Rik	0	0	0	0	0	0.833333	1.97368	0	1.49254	0	0	4.7619	0	0
4732490B19Rik	0	0	0	0	0	0	0	0	0	0	0	0	0	0
4732491K20Rik	0	0.892857	0	0	0	1.66667	1.75439	0	2.23881	3.7037	1.53846	9.52381	3.38983	0
4831426I19Rik	4.49438	0.892857	0	4.67836	0	0	0.657895	3.125	1.49254	0	1.53846	0	0	0
4831440E17Rik	4.49438	0.892857	6.06061	2.92398	3.44828	2.5	5.26316	4.6875	4.47761	0	4.61538	9.52381	6.77966	0
4832428D23Rik	0	0	0	0	0	0.833333	0.219298	0	0	3.7037	0	0	0	8
4833403I15Rik	0	0	0	0	0	0	0	0	0	0	0	0	0	0
4833412C05Rik	0	0	0	0	0	0	0.657895	0	1.49254	0	1.53846	0	0	0
4833417C18Rik	3.37079	0	0	0	0	0.833333	0.219298	3.125	1.49254	0	0	4.7619	0	0
4833418N02Rik	0	0	0	0.584795	3.44828	0	1.53509	3.125	0.746269	0	1.53846	0	6.77966	0
4833419F23Rik	3.37079	4.46429	0	0	3.44828	3.33333	0.219298	1.5625	4.47761	0	1.53846	4.7619	1.69492	0
4833420G17Rik	14.6067	16.0714	15.1515	11.1111	13.7931	15	11.8421	9.375	14.1791	3.7037	7.69231	19.0476	10.1695	4
4833422C13Rik	0	0	0	0	0	0.833333	0	0	0	0	0	0	1.69492	12
4833423E24Rik	0	0	0	0	0	0	0	0	0	0	0	0	0	0
4833424O15Rik	0	0	0	0	0	0	0	0	0	0	0	0	0	0
4833427F10Rik	0	0	0	0	0	0	0	0	0	0	0	0	0	0
4833427G06Rik	0	0	0	0	0	0	0.219298	0	0	0	0	95.2381	0	0
4833428L15Rik	0	0	0	0	0	0	0	0	0	0	0	0	0	0
4833439L19Rik	37.0787	29.4643	6.06061	8.18713	65.5172	26.6667	19.5175	12.5	26.1194	14.8148	15.3846	57.1429	45.7627	16
4833442J19Rik	3.37079	2.67857	6.06061	5.84795	6.89655	4.16667	11.1842	3.125	13.4328	7.40741	3.07692	52.381	16.9492	20
4921501E09Rik	0	0	0	0	0	0	0	0	0	0	0	0	0	0
4921504E06Rik	0	0	0	0	0	0	0	0	0	0	0	0	0	0
4921506M07Rik	0	0	0	0	0	0	0	0	0	0	0	0	0	0
4921507L20Rik	0	0	0	0	0	0	0	0	0	0	0	0	0	0
4921507P07Rik	0	0	0	0	0	0	0.219298	0	0	0	0	4.7619	1.69492	0
4921508A21Rik	0	0	0	0	0	0	0	0	0	0	0	0	0	0
4921508D12Rik	0	0	0	0	0	0	0	0	0	0	0	0	0	0
4921509C19Rik	0	0	0	0	0	0	0	0	0	0	0	0	0	0
4921509O07Rik	0	0	0	0	0	0	0	0	0	0	0	0	0	0
4921510H08Rik	0	0	0	0	0	0	0	0	0	0	0	0	0	0
4921511C10Rik	0	0	0	0	0	0	0	0	0	0	0	0	0	0
4921511C20Rik	0	0	0	0	0	0	0	0	0	0	0	0	0	0
4921511H03Rik	0	0	0	0	0	0	0	0	0	0	0	0	0	0
4921511I17Rik	0	0	0	0	0	0.833333	0	0	0	0	0	0	0	0
4921511M17Rik	0	0	0	0	0	0	0	0	0	0	0	0	0	0
4921513D23Rik	29.2135	14.2857	18.1818	15.2047	20.6897	29.1667	29.6053	17.1875	33.5821	7.40741	32.3077	47.619	25.4237	24
4921513I03Rik	0	0	0	0	0	0	0	0	0	0	0	0	0	0
4921515E04Rik	0	0	0	0	0	0	0	0	0	0	0	0	0	0
4921515J06Rik	0	0	0	0	0	0	0	0	0	0	0	0	0	0
4921517D21Rik	0	0	0	0	0	0	0	0	0	0	0	0	0	0
4921517D22Rik	0	0	0	0	0	0	0	0	0	0	0	0	0	0
4921517L17Rik	2.24719	0	3.0303	0.584795	0	0	0.657895	3.125	0	0	0	0	0	0
4921523A10Rik	0	0	0	0	0	0	0	0	0	0	0	0	0	0
4921524J17Rik	16.8539	11.6071	21.2121	17.5439	34.4828	22.5	13.8158	4.6875	17.9104	0	13.8462	52.381	5.08475	36
4921524L21Rik	0	0	0	0	0	0	0	0	0	0	0	0	0	0
4921525B02Rik	0	0	0	0	0	0	0	0	0	0	0	0	0	0
4921525O09Rik	0	0	0	0	0	0	0	0	0	0	0	0	0	0
4921528I01Rik	0	0	0	0	0	0	0	0	0	0	0	0	0	0
4921528O07Rik	0	0	0	0	0	0	0	0	0	0	0	0	0	0
4921530D09Rik	0	0	0	0	0	0	0	0	0	0	0	0	0	0
4921530L18Rik	0	0.892857	0	0.584795	0	0	0.438596	3.125	0	0	0	4.7619	0	0
4921530L21Rik	0	0	0	0	0	0	0	0	0	0	0	0	0	0
4921531C22Rik	4.49438	4.46429	6.06061	3.50877	0	0.833333	2.85088	3.125	5.97015	3.7037	3.07692	0	5.08475	0
4921531P14Rik	0	0	0	0	0	0	0	0	0	0	0	0	0	0
4921533I20Rik	0	0	0	0	0	0	0	0	0	0	0	0	0	0
4921536K21Rik	0	0	0	0	0	0	0.219298	0	0.746269	0	0	4.7619	0	0
4921539E11Rik	0	0	0	0	0	0	0	0	0	0	0	0	0	0
4922501C03Rik	3.37079	4.46429	6.06061	3.50877	3.44828	2.5	3.07018	1.5625	8.95522	0	3.07692	33.3333	3.38983	0
4922501L14Rik	0	0.892857	0	0	0	0	0	0	0	0	0	38.0952	0	0
4922502D21Rik	0	0	0	0	0	0	0	0	0	0	0	0	0	0
4922502H24Rik	0	0	0	0	0	0	0	0	0	0	0	0	0	0
4922502N22Rik	0	0	0	0	0	0	0	0	0	0	0	0	0	0
4922505E12Rik	0	0	0	0	0	0	0	0	0	0	0	0	0	0
4922505G16Rik	0	0	0	0	0	0	0	0	0	0	0	0	0	0
4930401C15Rik	0	0	0	0	0	0	0	0	0	0	0	0	0	0
4930401O10Rik	0	0	0	0	0	0	0	0	0	0	0	0	0	0
4930401O12Rik	0	0	0	0	0	0	0	0	0	0	0	0	0	0
4930402F06Rik	0	0	0	0	0	0	0	0	0	0	0	0	0	0
4930402F11Rik	0	0	0	0	0	0	0	0	0	0	0	0	0	0
4930402H24Rik	2.24719	8.03571	3.0303	1.16959	13.7931	9.16667	12.7193	0	8.95522	3.7037	7.69231	42.8571	8.47458	8
4930403N07Rik	0	0	0	0	0	0	0	0	0	0	0	0	0	0
4930404A05Rik	0	0	0	0	0	0	0	0	0	0	0	0	0	0
4930404A10Rik	0	0	0	0	0	0	0	0	0	0	0	0	0	0
4930404H11Rik	0	0	0	0	0	0	0.219298	0	2.98507	0	0	0	0	0
4930404H21Rik	0	0	0	0	0	0	0	0	0	0	0	0	0	0
4930404I05Rik	0	0	0	0	0	0	0	0	0	0	0	4.7619	0	0
4930404N11Rik	0	0	0	1.16959	0	0.833333	0.877193	3.125	2.98507	0	0	76.1905	3.38983	0
4930405A10Rik	0	0	0	0	0	0	0	0	0	0	0	0	0	0
4930405A21Rik	0	0	0	0	0	0	0	0	0	0	0	4.7619	0	0
4930405D11Rik	0	0	0	0	0	0	0	0	0	0	0	0	0	0
4930405J17Rik	0	0	0	0	0	0	0	0	0	0	0	0	0	0
4930405P13Rik	0	0	0	0	0	0	0	0	0	0	0	0	0	0
4930406D18Rik	0	0	0	0	0	0	0	0	0	0	0	0	0	0
4930407I10Rik	0	0	0	0	0	0	0	0	0	0	0	0	0	0
4930408F14Rik	0	0	0	0	0	0	0	0	0	0	0	0	0	0
4930412B13Rik	0	0	0	0	0	0	0	0	0	0	0	0	0	0
4930412C18Rik	0	0.892857	0	0	0	0	0.438596	0	0	0	0	19.0476	0	0
4930412F15Rik	0	0	0	0	0	0	0.219298	0	0	0	0	0	0	0
4930412O13Rik	0	0	0	0	0	0	0	0	0	0	0	0	0	0
4930413E15Rik	0	0	0	0	0	0	0	0	0	0	0	0	0	0
4930413F20Rik	0	0	0	0	0	1.66667	0.219298	0	0	0	0	0	0	0
4930413G21Rik	2.24719	0	0	0	0	1.66667	0.438596	0	0	3.7037	0	0	3.38983	0
4930413M19Rik	0	0	0	0	0	0	0	0	0	0	0	0	0	0
4930414L22Rik	2.24719	0.892857	3.0303	1.75439	6.89655	3.33333	3.28947	1.5625	3.73134	0	4.61538	4.7619	5.08475	4
4930414N06Rik	0	0	0	0	0	0	0	0	0	0	0	0	0	0
4930415F15Rik	0	0	0	0	0	0	0	0	0	0	0	0	0	0
4930415L06Rik	0	0	0	0	0	0	0	0	0	0	0	0	0	0
4930415O20Rik	0	0	0	0	0	0	0.219298	0	0	0	0	4.7619	0	0
4930417G10Rik	0	0	0	0	0	0	0.219298	0	0	0	0	0	0	0
4930417O13Rik	0	0	0	1.75439	0	0	0	0	0	0	0	0	0	0
4930417O22Rik	0	0	0	0	0	0	0	0	0	0	0	0	0	0
4930419G24Rik	0	0	0	0	0	0	0	0	0	0	0	0	0	0
4930420K17Rik	44.9438	9.82143	57.5758	29.2398	58.6207	35	8.99123	48.4375	3.73134	7.40741	7.69231	52.381	93.2203	20
4930422G04Rik	2.24719	1.78571	0	0	0	0	0.438596	3.125	0.746269	0	0	0	0	0
4930423M02Rik	0	0	0	0	0	0	0	0	0	0	0	0	0	0
4930425K10Rik	0	0	0	0	0	0	0	0	0	0	0	0	0	0
4930425O10Rik	0	0	0	0	0	0	0	0	0	0	0	0	0	0
4930426L09Rik	0	0	0	0	0	0	0	3.125	0	0	0	0	0	0
4930427A07Rik	0	4.46429	6.06061	6.43275	0	0	11.8421	1.5625	6.71642	0	6.15385	47.619	16.9492	4
4930428D18Rik	0	0	0	0	0	0	0	0	0	0	0	0	0	0
4930428E07Rik	0	0	0	0	0	0	0	0	0	0	0	0	0	0
4930428E23Rik	0	0	0	0	0	0	0	0	0	0	0	0	0	0
4930428G15Rik	0	0	0	0	0	0	0	0	0	0	0	0	0	0
4930428O21Rik	0	0	0	0	0	0	0	0	0	0	0	0	0	0
4930429B21Rik	0	0	0	0	0	0	0.219298	0	0	0	1.53846	4.7619	1.69492	0
4930429D17Rik	0	0	0	0	0	0	0	0	0	0	0	0	1.69492	0
4930429F11Rik	0	0	0	0	0	0	0	0	0	0	0	0	0	0
4930429F24Rik	0	0	0	0.584795	0	0	0	0	0	0	0	0	0	0
4930430A15Rik	0	0	0	0	0	0	0	0	0	0	0	0	0	0
4930430D24Rik	0	0	0	0	0	0	0	0	0	0	0	0	0	0
4930430F08Rik	2.24719	1.78571	3.0303	1.75439	3.44828	5.83333	5.04386	3.125	2.98507	3.7037	3.07692	9.52381	1.69492	0
4930430F21Rik	0	0	0	0	0	0	0	0	0	0	0	0	0	0
4930430J02Rik	0	0	0	0	0	0	0	0	0	0	0	0	0	0
4930431A04Rik	0	0	0	0.584795	0	0	0	0	0	0	0	0	0	0
4930431P03Rik	0	6.25	0	0	0	0	0.219298	0	0.746269	0	0	0	0	0
4930432J09Rik	0	0	0	0	0	0	0	0	0	0	0	0	0	0
4930432K09Rik	0	0	0	0	0	0	0	0	0	0	0	0	0	0
4930432K21Rik	2.24719	0	0	0	0	0	0.219298	0	0	0	0	0	0	4
4930432M17Rik	0	0	0	0	0	0	0	0	0	0	0	0	0	0
4930433B08Rik	0	0	0	0	0	0	0	0	0	0	0	0	0	0
4930433I11Rik	0	0	0	0	0	0	0	0	0	0	0	0	0	0
4930433N12Rik	0	0	0	0	0	0	0	0	0	0	0	0	0	0
4930434J06Rik	0	0	0	0	0	0	0	0	0	0	0	0	0	0
4930435E12Rik	0	0	0	0	0	0	0	0	0	0	0	0	0	0
4930438E09Rik	0	0	0	0	0	0	0	0	0	0	0	0	0	0
4930440C22Rik	0	0	0	0	0	0	0	0	0	0	0	0	0	0
4930441J16Rik	0	0	0	0	0	0	0	0	0	0	0	0	0	0
4930441O14Rik	0	1.78571	0	0	0	0	0.219298	0	0	0	0	4.7619	0	0
4930442J19Rik	0	0	0	0	0	0	0	0	0	0	0	0	0	0
4930442L01Rik	0	0	0	0	0	0	0	0	0	0	0	0	0	0
4930443G12Rik	0	0	0	0	0	0	0	0	0	0	0	0	0	0
4930443O20Rik	0	0	0	0	0	0.833333	0	0	0	0	0	0	0	0
4930444A02Rik	3.37079	6.25	0	3.50877	0	2.5	3.72807	0	5.22388	0	1.53846	4.7619	10.1695	0
4930444F02Rik	0	0	0	0	0	0	0	0	0	0	0	4.7619	0	0
4930444G20Rik	0	0	0	0	0	0	0	0	0	0	0	0	0	0
4930444M15Rik	0	0	0	0	0	0	0	0	0	0	0	0	1.69492	0
4930444P10Rik	0	0	0	0	0	0	0	0	0	0	0	42.8571	0	0
4930447A16Rik	0	0	0	0	0	0	0	0	0	0	0	0	0	0
4930447C04Rik	0	0	0	0	0	0	0	0	0	0	0	0	0	0
4930447J18Rik	0	0	0	0	0	0	0	0	0	0	0	0	0	0
4930447K03Rik	1.1236	0	0	0	3.44828	0.833333	0	0	0	0	0	0	0	0
4930447N08Rik	0	0	0	0	0	0	0	0	0	0	0	0	0	4
4930448C13Rik	0	0	0	0	0	0	0	0	0	0	0	0	0	0
4930448F12Rik	0	0	0	0	0	0	0	0	0	0	0	0	0	0
4930448H16Rik	0	0	0	0	0	0	0	0	0	0	0	0	0	0
4930448I06Rik	0	0	0	0	0	0	0	0	0	0	0	0	0	0
4930448I18Rik	0	0	0	0	0	0	0	0	0	0	0	0	0	0
4930448K20Rik	0	0	0	0	0	0	0	0	0	0	0	0	0	0
4930449E01Rik	0	0	0	0	0	0	0	0	0	0	0	0	0	0
4930449E18Rik	0	0	0	0	0	0	0	0	0	0	0	0	0	0
4930449I24Rik	0	0	0	0	0	0	0	0	0	0	0	0	0	0
4930451C15Rik	1.1236	0	0	0	0	0	0.219298	0	0.746269	0	0	71.4286	0	0
4930451I11Rik	0	0	0	0	0	0	0	0	0	0	0	0	0	0
4930452A19Rik	0	0	0	0	0	0	0	0	0	0	0	0	0	0
4930452B06Rik	0	0	0	0	0	4.16667	0.219298	0	0	0	0	0	0	0
4930452G13Rik	0	0	0	0	0	0	0	0	0	0	0	0	0	0
4930452N14Rik	0	0.892857	0	0	0	0	0	0	0	0	0	0	0	0
4930453H23Rik	0	0	0	0	0	0	0	0	0	0	0	0	0	0
4930453N24Rik	21.3483	14.2857	9.09091	23.3918	34.4828	7.5	14.9123	9.375	17.1642	14.8148	15.3846	38.0952	22.0339	0
4930455B14Rik	0	0	0	0	0	0	0	0	0	0	0	0	0	0
4930455C13Rik	0	0	0	0	0	0	0	0	0	0	0	0	0	0
4930455C21Rik	11.236	14.2857	3.0303	6.43275	6.89655	7.5	7.67544	6.25	8.20896	3.7037	6.15385	28.5714	10.1695	0
4930455D15Rik	0	0	0	0	0	0	0	0	0	0	0	0	0	0
4930455F16Rik	0	0	0	0	0	0	0	0	0	0	0	0	0	0
4930455F23Rik	3.37079	8.92857	12.1212	2.33918	3.44828	0.833333	0.438596	0	4.47761	0	1.53846	95.2381	8.47458	0
4930455H04Rik	0	0	0	0	0	0	0	0	0	0	0	0	0	0
4930455J16Rik	0	0	0	0	0	0	0	0	0	0	0	0	0	0
4930456L15Rik	0	0	0	0	0	0	0	0	0	0	0	0	0	0
4930458L03Rik	0	0	0	0	0	0	0	0	0	0	0	0	0	0
4930459L07Rik	0	0	0	0	0	0	0	0	0	0	0	0	0	0
4930461G14Rik	0	0	0	0	0	0	0	0	0	0	0	0	0	0
4930465A12Rik	0	0	0	0	0	0	0	0	0	0	0	0	0	0
4930465K10Rik	0	0	0	0	0	0	0	1.5625	0	0	0	0	0	0
4930465M20Rik	0	0	0	0	0	0	0	0	0	0	0	0	0	0
4930467D21Rik	0	0	0	0	0	0	0	0	0	0	0	0	0	0
4930467E23Rik	0	0	0	0	0	0	0	0	0	0	0	0	0	0
4930467K11Rik	0	0	0	0	0	0	0	0	0	0	0	0	0	0
4930468A15Rik	0	0	0	0	0	0	0	0	0	0	0	0	0	0
4930469G21Rik	0	0	0	0	0	0	0	0	0	0	0	0	0	0
4930470H14Rik	0	0	0	0	0	0	0	0	0	0	0	0	0	0
4930470P17Rik	0	0	0	0	0	0	0	0	0	0	0	0	0	0
4930471C04Rik	0	0	0	0	0	0	0	0	0	0	0	0	0	0
4930471G03Rik	0	0	0	0	0	0	0.438596	0	0	0	0	0	0	0
4930471I20Rik	0	0	0	0	0	0	0	0	0	0	0	0	0	0
4930471M09Rik	0	0	0	0	0	0	0	0	0	0	0	0	0	0
4930471M23Rik	23.5955	26.7857	6.06061	5.84795	17.2414	8.33333	9.86842	6.25	8.20896	0	1.53846	9.52381	6.77966	28
4930473A02Rik	0	0	0	0	0	0	0	0	0	0	0	0	0	0
4930473A06Rik	0	2.67857	6.06061	1.75439	0	0	1.53509	1.5625	0.746269	3.7037	0	23.8095	1.69492	0
4930473O22Rik	0	0	0	0	0	0	0	0	0	0	0	0	0	0
4930474G06Rik	0	0	3.0303	0	0	0	0	0	0	0	0	0	0	0
4930474H20Rik	0	0	0	0	0	0	0	0	0	0	0	0	0	0
4930474M22Rik	0	0	0	0	0	0	0	0	0	0	0	0	0	0
4930474N05Rik	0	0	0	0	0	0	0	0	0	0	0	0	0	0
4930474N09Rik	0	0	0	0	0	0	0	0	0	0	0	0	0	0
4930478L05Rik	0	0	0	0	0	0	0	0	0	0	0	0	0	0
4930478P22Rik	0	0	0	0	0	0	0	0	0	0	0	0	0	0
4930479D17Rik	0	0	0	0	0	0	0	0	0	0	0	0	0	0
4930479M11Rik	0	0	0	0	0	0	0	0	0	0	0	0	0	0
4930480E11Rik	0	0	0	0	0	0	0	0	0	0	0	0	0	0
4930480G23Rik	0	0	0	0	0	0	0	0	0	0	0	0	0	0
4930480K15Rik	0	0	0	0	0	0	0	0	0	0	0	0	0	0
4930480M12Rik	0	0	0	0	0	0	0	0	0	0	0	4.7619	0	0
4930481A15Rik	3.37079	1.78571	3.0303	1.75439	6.89655	2.5	5.04386	1.5625	0.746269	0	1.53846	14.2857	6.77966	4
4930483J18Rik	0	0	0	0	0	0	0.219298	0	0	0	0	0	0	0
4930483K19Rik	0	0	0	0	0	0	0	0	0	0	0	0	0	0
4930483O08Rik	0	0	0	0	0	0	0	0	0	0	0	0	0	0
4930486F22Rik	0	0	0	0	0	0	0	0	0	0	0	0	0	0
4930486I03Rik	0	0	0	0	0	0	0	0	0	0	0	0	0	0
4930486L24Rik	0	1.78571	0	7.60234	3.44828	2.5	0.438596	0	0	0	0	0	0	0
4930487D11Rik	0	0	0	0	0	0	0	0	0	0	0	0	0	0
4930487H11Rik	0	0	0	0	0	0	1.53509	0	0	0	1.53846	0	3.38983	0
4930488B22Rik	0	0	0	0	0	0	0	0	0	0	0	0	0	0
4930488L21Rik	0	0	0	0	0	0	0	0	0	0	0	0	0	0
4930500F04Rik	0	0	0	0	0	0	0	0	0	0	0	0	0	0
4930500J02Rik	0	0	0	0	0	0	0	0	0	0	0	0	0	0
4930500L23Rik	0	0	0	0	0	0	0	0	0	0	0	0	0	0
4930502A04Rik	0	0	0	0	0	0	0	0	0.746269	0	0	4.7619	0	0
4930502E09Rik	0	0	0	0	0	0	0	0	0	0	0	0	0	0
4930502E18Rik	0	0.892857	0	0	0	0	0	0	0	0	0	0	0	0
4930503B20Rik	0	0	0	0	0	0	0	0	0	0	0	0	0	0
4930503E14Rik	0	0	0	0	0	0	0	0	0	0	0	0	0	0
4930503E24Rik	13.4831	1.78571	0	2.92398	3.44828	1.66667	1.31579	3.125	0.746269	3.7037	1.53846	0	1.69492	0
4930503H13Rik	0	0	0	0	0	0	0	0	0	0	0	0	0	0
4930503L19Rik	2.24719	0	0	2.33918	6.89655	1.66667	1.53509	1.5625	1.49254	0	1.53846	0	1.69492	4
4930503O07Rik	0	0	0	0	0	0	0	0	0	0	0	0	0	0
4930504O13Rik	0	0	0	0	0	0	0	0	0	0	0	0	0	0
4930505A04Rik	0	0	0	0	0	0	0.219298	0	0	0	0	14.2857	0	0
4930505G20Rik	0	0	0	0	0	0	0	0	0	0	0	0	0	0
4930506M07Rik	21.3483	74.1071	0	0.584795	0	2.5	0.438596	6.25	2.23881	0	0	33.3333	15.2542	0
4930507D05Rik	0	0	0	0	0	0	0	0	0	0	0	0	0	0
4930509E16Rik	0	0	0	0	0	0	0	0	0	0	0	0	1.69492	0
4930509J09Rik	0	0	0	0	0	0	0	0	0	0	0	0	0	0
4930509K18Rik	0	0	0	0	0	0	0	0	0	0	0	0	0	0
4930511A02Rik	0	0	0	0	0	0	0	0	0	0	0	0	0	0
4930511E03Rik	0	0	0	0	0	0	0	0	0	0	0	0	0	0
4930511I11Rik	0	0	0	0	0	0	0.219298	0	0	0	0	0	0	0
4930511M06Rik	0	0	0	0	0	0	0	0	0	0	0	0	0	4
4930511M11Rik	0	0	0	0	0	0	0	0	0	0	0	0	0	0
4930512B01Rik	0	0	0	0	0	0	0	0	0	0	0	9.52381	0	0
4930513D17Rik	0	0	0	0	0	0	0	0	0	0	0	0	0	0
4930513N10Rik	1.1236	0.892857	0	1.16959	0	0	0	0	0	0	0	0	0	0
4930513O06Rik	0	0	0	0	0	0	0	0	0	0	0	0	0	0
4930515B02Rik	0	0	0	0	0	0	0	0	0	0	0	0	0	0
4930515G01Rik	2.24719	0	0	0.584795	0	0	0.219298	3.125	0	0	0	0	0	0
4930515G16Rik	0	0	0	0	0	0	0	0	0	0	0	0	0	0
4930515L03Rik	0	0	0	0	0	0	0	0	0	0	0	0	0	0
4930515L19Rik	0	0	0	0	0	0	0	0	0	0	0	0	0	0
4930517E11Rik	0	0	0	0	0	0	0	0	0	0	0	0	0	0
4930518P08Rik	0	0	0	0	0	0	0	0	0	0	0	0	0	0
4930519D14Rik	0	0	0	0	0	0	0	0	0	0	0	0	0	0
4930519F09Rik	0	0	3.0303	0	0	0	0.219298	0	0	0	0	0	0	0
4930519F16Rik	0	0	0	0	0	0	0	0	0	0	0	0	0	0
4930519F24Rik	0	0	0	0	0	0	0	0	0	0	0	0	0	0
4930519G04Rik	0	0	0	0	0	0	0	0	0	3.7037	0	0	0	0
4930519H02Rik	0	0	0	0	0	0	0	0	0	0	0	0	0	0
4930520O04Rik	0	0	0	0	0	0	0	0	0	0	0	0	0	0
4930520P13Rik	0	0	0	0	0	0	0	0	0	0	0	0	0	0
4930521A18Rik	0	0	0	0	0	0	0	0	0	0	0	0	0	0
4930521E06Rik	0	0	0	0	0	0	0	0	0	0	0	0	0	0
4930522H14Rik	0	0	0	0	0	0	0	0	0	0	0	0	0	0
4930522O17Rik	0	0	0	0	0	0	0	0	0	0	0	0	0	0
4930523C07Rik	37.0787	17.8571	63.6364	23.9766	48.2759	29.1667	42.7632	17.1875	35.8209	14.8148	41.5385	66.6667	27.1186	40
4930523O13Rik	0	0	0	0	0	0	0	0	0	0	0	0	0	0
4930524B15Rik	0	0	0	0	0	0	0	0	0	0	0	0	0	0
4930524C18Rik	0	0	0	0	0	0	0	0	0	0	0	0	0	0
4930524E20Rik	0	0	0	0	0	0	0	0	0	0	0	0	0	0
4930524L23Rik	0	0	0	0	0	0	0.219298	0	0	0	0	0	0	0
4930524N10Rik	0	0	0	0	0	0	0	0	0	0	0	0	0	0
4930524O05Rik	0	0	0	0	0	0	0	0	0	0	0	0	0	0
4930524O08Rik	0	0	0	0	0	0	0	0	0	0	0	0	0	0
4930525D18Rik	0	0	0	0	0	0	0	0	0	0	0	0	0	0
4930525F21Rik	0	0	0	0	0	0	0	0	0	0	0	0	0	0
4930525G20Rik	0	0	0	0	0	0	0.219298	0	0.746269	0	0	0	1.69492	0
4930525M21Rik	0	0	0	0	0	0	0	0	0	0	0	0	0	0
4930526D03Rik	0	0	0	0	0	0	0	0	0	0	0	0	0	0
4930526I15Rik	14.6067	4.46429	3.0303	6.43275	10.3448	5.83333	10.5263	7.8125	10.4478	7.40741	7.69231	38.0952	15.2542	4
4930526L06Rik	0	0	0	0	0	0	0	0	0	0	0	0	0	0
4930527F14Rik	0	0	0	0	0	0	0	0	0	0	0	9.52381	0	0
4930527G23Rik	0	0	0	0	0	0	0	0	0	0	0	0	0	0
4930528A17Rik	0	0	0	0	0	0	0	1.5625	0	0	0	0	0	0
4930528D03Rik	0	0	0	0	0	0.833333	0	0	0	0	0	4.7619	0	0
4930528F23Rik	0	0	0	0	0	0	0	0	0	0	0	0	0	0
4930528P14Rik	0	0	0	0	0	0	0	0	0	0	0	0	0	0
4930529C04Rik	0	0	0	0	0	0	0	0	0	0	0	0	0	0
4930529F22Rik	0	0	0	0	0	0	0	0	0	0	0	0	0	0
4930529F24Rik	0	0	0	0	0	0	0	0	0	0	0	0	0	0
4930529K09Rik	0	0	0	0	0	0	0	0	0	0	0	0	0	0
4930529L06Rik	0	0	0	0	0	0	0	0	0	0	0	0	0	0
4930529M08Rik	0	0	0	0	0	0	0	0	0	0	0	4.7619	0	0
4930533B01Rik	0	0	0	0	0	0	0	0	0	0	0	0	0	0
4930533P14Rik	0	0	0	0	0	0	0	0	0	0	0	0	0	0
4930534B04Rik	0	1.78571	0	0	0	0.833333	0.438596	0	0	0	1.53846	28.5714	0	0
4930538K18Rik	0	0	0	0	0	0	0.219298	0	0.746269	0	0	0	0	0
4930539C22Rik	0	0	0	0	0	0	0	0	0	0	0	0	0	0
4930539E08Rik	1.1236	0	0	0	0	0.833333	0	0	0	0	0	0	0	0
4930539J05Rik	0	0	0	0	0	0.833333	0.219298	1.5625	0.746269	0	1.53846	4.7619	0	0
4930539M17Rik	0	0	0	0	0	0	0	0	0	0	0	0	0	0
4930539N22Rik	0	0	0	0	0	0	0	0	0	0	0	0	0	0
4930540M03Rik	0	0	0	0	0	0	0	0	0	0	0	0	0	0
4930542C21Rik	0	0	0	0	0	0	0	0	0	0	0	0	0	0
4930542D17Rik	0	0	0	0	0	0	0	0	0	0	0	0	0	4
4930542H20Rik	0	0	0	0	0	0	0	0	0	0	0	0	0	0
4930543E12Rik	0	0	0	0	0	0	0	0	0	0	0	0	0	0
4930544D05Rik	0	0	0	0	0	0	0	0	0	0	0	0	0	0
4930544G11Rik	0	0	0	0	0	0	0	0	0	0	0	0	0	0
4930544M13Rik	0	0	0	0	0	0	0	0	0	0	0	0	0	0
4930544O15Rik	0	0	0	0	0	0	0	0	0	0	0	4.7619	0	0
4930545E07Rik	0	0	0	0	0	0	0	0	0	0	0	0	0	0
4930545H06Rik	0	0	0	0	0	0	0	0	0	0	0	0	0	0
4930545L23Rik	0	0	0	0	0	0	0	0	0	0	0	0	0	0
4930546C10Rik	0	0	0	0	0	0	0	0	0	0	0	0	0	0
4930546K05Rik	0	0	0	0	0	0	0	0	0	0	0	0	0	0
4930547C10Rik	0	0	0	0	0	0	0	0	0	0	0	0	0	0
4930547E08Rik	0	0	0	0	0	0	0	0	0	0	0	0	0	0
4930547E14Rik	0	0	0	0	0	0	0	0	0	0	0	0	0	0
4930547N16Rik	0	0.892857	0	0	0	0	0	0	0	0	0	0	1.69492	0
4930548G14Rik	0	0	0	0	0	0	0	0	0	0	0	0	0	0
4930548H24Rik	0	0	0	0	0	0	0	0	0	0	0	0	0	0
4930548J01Rik	0	0	0	0	0	0	0	0	0	0	0	0	0	0
4930548K13Rik	0	0	0	0	0	0	0	0	0	0	0	0	0	0
4930549C01Rik	0	0	0	0	0	0	0	0	0	0	0	0	0	0
4930549G23Rik	5.61798	2.67857	6.06061	0.584795	3.44828	3.33333	3.28947	1.5625	2.98507	3.7037	6.15385	0	3.38983	0
4930550C14Rik	0	0	0	0	0	0	2.19298	0	0.746269	0	0	42.8571	0	0
4930550L24Rik	0	0	0	0	0	0	0	0	0	0	0	0	0	0
4930552N02Rik	0	0	0	0	0	0	0	0	0	0	0	0	0	0
4930552P12Rik	0	0	0	0	0	0	0	0	0	0	0	0	0	0
4930553E22Rik	0	0	0	0	0	0	0	0	0	0	0	0	0	0
4930554C24Rik	0	0	0	0	0	0	0	0	0	0	0	0	0	0
4930555B11Rik	0	0	0	0	0	0	0	0	0	0	0	0	0	0
4930555G01Rik	0	0	0	0	0	0	0	0	0	0	0	0	0	0
4930555I21Rik	0	0	0	0	0	0	0	0	0	3.7037	0	14.2857	1.69492	0
4930556C24Rik	0	0	0	0	0	0	0	0	0	0	0	0	0	0
4930556G01Rik	0	0	0	0	0	0	0	0	0	0	0	0	0	0
4930556J02Rik	0	0	0	0	0	0	0	0	0	0	0	0	0	0
4930556M19Rik	0	0	0	0	0	4.16667	0.877193	0	0	0	0	28.5714	25.4237	4
4930556N09Rik	0	0	0	0	0	0	0	0	0	0	0	0	0	0
4930557A04Rik	0	0	0	0	0	0	0	0	0	0	0	0	0	0
4930557J02Rik	1.1236	0	0	1.16959	0	0	0.657895	0	0	0	0	0	0	0
4930558C23Rik	0	0	0	0	0	0	0	0	0	0	0	0	0	0
4930558G05Rik	0	0	0	0	0	0	0	0	0	0	0	0	0	0
4930558J18Rik	0	0.892857	0	0	0	0	0	0	0	0	0	0	1.69492	0
4930558K02Rik	0	0	0	0	0	0	0	0	0	0	0	0	0	0
4930562C15Rik	0	0	0	0	0	0	0	0	0	0	0	19.0476	0	0
4930562F07Rik	0	0	0	0	0	0	0.219298	0	0	0	1.53846	0	0	0
4930563D23Rik	0	0	0	0	0	0	0	0	0	0	0	0	0	0
4930563E18Rik	0	0	0	0	0	0	0	0	0	0	0	0	0	0
4930563E22Rik	0	0	0	0	0	0	1.31579	0	0	0	0	0	0	0
4930563F08Rik	0	0	0	0	0	0	0	0	0	0	0	0	0	0
4930563M20Rik	0	0	0	0	0	0	0	0	0	0	0	0	0	0
4930564B18Rik	0	0	0	0	0	0	0	0	0	0	0	0	0	0
4930564D02Rik	0	0	0	0	0	0	0	0	0	0	0	0	0	0
4930564G21Rik	0	0	0	0	0	0	0	0	0	0	0	0	0	0
4930564K09Rik	0	0	0	0	0	0	0.438596	0	0	0	0	0	0	0
4930565A17	0	0	0	0	0	0	0	0	0	0	0	0	0	0
4930565D16Rik	0	0	0	0	0	0	0	0	0	0	0	0	0	0
4930565N06Rik	0	0	0	0	0	0	0	0	0	0	0	0	0	0
4930567H12Rik	0	0	0	0	0	0	0	0	0	0	0	0	0	0
4930567H17Rik	0	0	0	0	0	0	0	0	0	0	0	0	0	0
4930567J20Rik	0	0	0	0	0	0	0	0	0	0	0	0	0	0
4930567K20Rik	0	0	0	0	0	0	0	0	0	0	0	0	0	0
4930568D16Rik	0	0	0	0	0	0	0	0	0	0	0	0	0	0
4930568E12Rik	0	0	0	0	0	0	0	0	0	0	0	0	0	0
4930568G15Rik	0	0	0	0	0	0	0	0	0	0	0	0	0	0
4930568K20Rik	0	0	0	0	0	0	0	0	0	0	0	0	0	0
4930570G19Rik	2.24719	0	0	0	0	0	1.53509	0	0.746269	0	0	0	0	0
4930571K23Rik	0	0	0	0	0	0	0	0	0	0	0	0	0	0
4930572J05Rik	15.7303	9.82143	9.09091	9.94152	27.5862	17.5	9.42982	3.125	5.97015	3.7037	7.69231	71.4286	16.9492	8
4930572K03Rik	0	0	0	0	0	0	0	0	0	0	0	0	0	0
4930572O13Rik	0	0	0	0	0	0	0	0	0	0	0	0	0	0
4930573O16Rik	0	0	0	0	0	0	0	0	0	0	0	0	0	0
4930578C19Rik	0	0	0	0	0	0	0	0	0	0	0	0	0	0
4930578E11Rik	0	0	0	0	0	0	0	0	0	0	0	0	0	0
4930578I06Rik	0	0	0	0	0	0	0	0	0	0	0	0	0	0
4930578M01Rik	3.37079	0	0	0.584795	0	0.833333	1.09649	0	1.49254	0	0	0	0	0
4930578N16Rik	1.1236	0	0	0.584795	0	1.66667	3.07018	0	2.23881	0	1.53846	52.381	1.69492	0
4930578N18Rik	0	0	0	0	0	0	0	0	0	0	0	0	0	0
4930579C15Rik	0	0	0	0	0	0	0	0	0	0	0	0	0	0
4930579F01Rik	0	0	0	0	0	0	0	0	0	0	0	0	0	0
4930579G18Rik	0	0.892857	0	0	0	0	0	0	0.746269	0	0	0	0	0
4930579G22Rik	2.24719	0.892857	0	1.16959	3.44828	1.66667	2.41228	1.5625	2.23881	0	0	47.619	6.77966	0
4930579G24Rik	4.49438	4.46429	0	2.92398	0	1.66667	2.41228	0	5.22388	7.40741	1.53846	0	1.69492	4
4930579K19Rik	0	0	3.0303	0.584795	0	0.833333	0.877193	0	1.49254	0	0	23.8095	0	4
4930581F22Rik	2.24719	0	0	4.09357	3.44828	0.833333	0.219298	0	0.746269	7.40741	0	0	1.69492	0
4930583H14Rik	2.24719	0	0	0	0	0	0	1.5625	2.23881	0	0	0	0	0
4930583K01Rik	0	0	0	0	0	0	0	0	0	0	0	0	0	0
4930583P06Rik	0	0	0	0	0	0	0	0	0	0	0	0	0	0
4930584F24Rik	0	0	0	0	0	0	0	0	0	0	0	0	0	0
4930588N13Rik	0	0	0	0	0	0	0	0	0.746269	0	0	42.8571	0	0
4930590J08Rik	0	0	0	0	0	0.833333	0	0	0.746269	0	0	0	0	0
4930590L20Rik	0	0	0	0	0	0	0	0	0	0	0	0	0	0
4930591A17Rik	0	0	0	0	0	0	0	0	0	0	0	0	0	0
4930592A05Rik	0	0	0	0	0	0	0	0	0	0	0	0	0	4
4930592I03Rik	0	0	0	0	0	0	0	0	0	0	0	0	0	0
4930593A02Rik	0	0	0	0	0	0	0	0	0	0	0	0	0	0
4930593C16Rik	0	0	0	0	0	0	0	0	0	0	0	4.7619	0	0
4930594C11Rik	1.1236	0	3.0303	0.584795	0	0.833333	0.657895	0	0.746269	0	1.53846	0	0	0
4930595M18Rik	0	0	0	0	0	0	0	0	0	0	0	0	0	0
4930596D02Rik	0	0	0	0	0	0	0	0	0	0	0	0	0	0
4930596M17Rik	0	0	0	0	0	0	0	0	0	0	0	0	0	0
4930597G03Rik	0	0	0	0	0	0	0	0	0	0	0	0	0	0
4930598F16Rik	0	0	0	0	0	0	0	0	0	0	0	0	0	0
4930599N23Rik	2.24719	4.46429	0	0	0	0	0.877193	1.5625	0	0	1.53846	0	0	0
4931402G19Rik	0	0	0	0	0	0	0.219298	0	0	0	0	0	0	0
4931403E22Rik	0	0	0	0	0	0	0	0	0	0	0	0	0	0
4931403G20Rik	0	0	3.0303	0	0	0	0.219298	0	0	0	0	0	0	0
4931406B18Rik	0	0	0	0	0	0	0	0	0	0	0	0	0	0
4931406C07Rik	7.86517	25.8929	3.0303	1.16959	3.44828	7.5	7.45614	3.125	5.97015	0	3.07692	61.9048	18.6441	12
4931406H21Rik	0	0.892857	0	0	0	0	0.657895	0	0	0	0	0	1.69492	0
4931406P16Rik	10.1124	16.0714	3.0303	7.60234	72.4138	48.3333	10.7456	3.125	9.70149	11.1111	7.69231	28.5714	13.5593	4
4931407G18Rik	0	0	0	0	0	0	0	0	0	0	0	0	0	0
4931408A02Rik	0	0	0	0	0	4.16667	4.16667	0	5.22388	0	0	42.8571	10.1695	0
4931408C20Rik	0	0	0	0	0	0	0	0	0	0	0	0	0	0
4931408D14Rik	0	0	0	0	0	0	0.219298	0	0	0	1.53846	0	1.69492	0
4931409K22Rik	0	0	0	0	0	0	0	0	0	0	0	0	0	0
4931414P19Rik	2.24719	1.78571	0	0	0	3.33333	2.41228	1.5625	0.746269	0	1.53846	19.0476	1.69492	4
4931417E11Rik	0	0	0	0	0	0	0	0	0	0	0	0	0	0
4931417G12Rik	0	0	0	0	0	0	0	0	0	0	0	0	0	0
4931419H13Rik	0	0	0	0	0	0	0	0	0	0	0	0	0	0
4931420L22Rik	0	0	0	0	0	0	0	0	0	0	0	0	0	0
4931423N10Rik	0	0	0	0	0	0	0	0	0	0	0	0	0	0
4931428F04Rik	0	1.78571	0	0	0	0	4.38596	0	0.746269	0	0	0	5.08475	0
4931428L18Rik	0	0.892857	0	0	0	0	0	0	0	0	0	0	0	0
4931429I11Rik	0	0	0	0	0	0	0	0	0	0	0	42.8571	0	0
4931429L15Rik	0	0	0	0	0	0	0	0	0	0	0	0	0	0
4931429P17Rik	0	0	0	0	0	0	0	0	0	0	0	0	0	0
4931430N09Rik	0	0	0	0	0	0	0	0	0	0	0	0	0	0
4931431B13Rik	0	0	0	0	0	0	0	0	0	0	0	0	0	0
4931431C16Rik	0	0	0	0	0	0	0	0	0	0	0	0	0	0
4931431F19Rik	0	0	0	0	0	0	0	0	0	0	0	0	0	0
4931440F15Rik	0	0.892857	0	0	0	0.833333	0	0	0.746269	0	0	0	0	4
4931440J10Rik	0	0	0	0	0	0	0	0	0	0	0	0	0	0
4931440L10Rik	0	0	0	0	0	0	0	0	0	0	0	0	0	0
4931440P22Rik	7.86517	3.57143	3.0303	1.16959	0	1.66667	5.26316	10.9375	2.23881	7.40741	3.07692	4.7619	0	16
4932411E22Rik	0	0	0	0	0	0	0	0	0	0	0	4.7619	0	0
4932411G14Rik	0	0	0	0	0	0	0	0	0	0	0	0	0	0
4932411L15	1.1236	0.892857	3.0303	0.584795	0	0	1.97368	1.5625	5.22388	0	0	14.2857	0	0
4932411N23Rik	0	0	0	0	0	0	0	0	0	0	0	0	0	0
4932412D23Rik	0	0	0	0	0	0	0	0	0	0	0	0	0	0
4932412H11Rik	0	1.78571	0	0	0	0	0.438596	0	0	0	0	0	1.69492	0
4932413F04Rik	0	0	0	0	0	0	0	0	0	0	0	0	0	0
4932414J04Rik	0	0	0	0	0	0	0	0	0	0	0	0	0	0
4932414N04Rik	0	0	0	0	0	0	0	0	0	0	0	0	0	0
4932415G12Rik	2.24719	5.35714	3.0303	1.16959	0	1.66667	2.19298	1.5625	0.746269	0	0	4.7619	3.38983	0
4932415M13Rik	0	0	0	0	0	0	0	0	0	0	0	0	0	0
4932416H05Rik	2.24719	0.892857	0	0	10.3448	0	1.31579	0	5.22388	0	1.53846	4.7619	0	0
4932416K20Rik	0	0	0	0	0	0	0	0	0	0	0	0	0	0
4932418E24Rik	0	0	0	0	0	0	0	0	0	0	0	0	0	0
4932425I24Rik	0	0	0	0	0	0	0	0	0	0	0	52.381	0	4
4932429P05Rik	0	0	0	0	0	0	0	0	0	0	0	0	0	0
4932435O22Rik	0	0	0	0	0	0	0	0	0	0	0	0	0	0
4932438A13Rik	7.86517	19.6429	15.1515	11.1111	13.7931	8.33333	10.9649	9.375	14.9254	11.1111	9.23077	23.8095	22.0339	16
4932438H23Rik	0	0	0	0	0	0	0.877193	0	0.746269	0	0	0	0	0
4932441B19Rik	0	0	0	0	0	0	0	0	0	0	0	0	0	0
4932441J04Rik	0	0	0	0	0	0	0.219298	0	0	0	0	0	0	0
4932443I19Rik	0	0	0	0	0	0	0.219298	0	0	0	0	61.9048	0	0
4932702P03Rik	0	0	0	0	0	0	0	0	0	0	0	0	0	0
4933400A11Rik	0	0	0	0	0	0	0	0	0	0	0	0	0	0
4933400B14Rik	0	0	0	0	0	0	0	0	0	0	0	0	0	0
4933400C05Rik	0	0	0	0	0	0	0	0	0	0	0	0	0	0
4933400C23	0	0	0	0	0	0	0	0	0	0	0	0	0	0
4933400F21Rik	0	0	0	0	0	0	0.219298	0	0	0	0	0	0	0
4933400L20Rik	0	0	0	0	0	0	0	0	0	0	0	0	0	0
4933401B06Rik	0	0	0	0	0	0	0	0	0	0	0	0	0	0
4933401D09Rik	0	0	0	0	0	0	0	0	0	0	0	0	0	0
4933401H06Rik	0	0	0	0	0	0	0	0	0	0	0	0	0	0
4933401P06Rik	0	0	0	0	0	0	0	0	0	0	0	0	0	0
4933402C06Rik	0	0	0	0	0	0	0	0	0	0	0	0	0	0
4933402D24Rik	0	0	0	0	0	0	0	0	0	0	0	0	0	0
4933402E13Rik	0	0	0	0	0	0	0	0	0	0	0	0	0	0
4933402J07Rik	0	0	0	0	0	0	0	0	0	0	0	0	0	0
4933402J10Rik	0	0	0	0	0	0	0	0	0	0	0	0	0	0
4933402J15Rik	0	0	0	0	0	0	0	0	0	0	0	0	0	0
4933402N03Rik	0	0	0	0	0	0	0	0	0	0	0	0	0	0
4933402N22Rik	0	0	0	0	0	0	0	0	0	0	0	0	0	0
4933402P03Rik	0	0	0	0	0	0	0	0	0	0	0	0	0	0
4933403F05Rik	4.49438	8.92857	0	4.67836	3.44828	3.33333	8.11404	4.6875	3.73134	0	3.07692	14.2857	10.1695	0
4933403G14Rik	0	0	3.0303	0.584795	0	0	3.07018	1.5625	2.23881	0	3.07692	0	0	4
4933403O08Rik	0	0	0	0	0	0	0	0	0	0	0	0	0	0
4933404G15Rik	0	0	0	0	0	0	0	0	0	0	0	0	0	0
4933404K08Rik	0	0	0	0	0	0	0	0	0	0	0	0	0	0
4933404M02Rik	0	0	0	1.16959	6.89655	0.833333	0.219298	1.5625	1.49254	0	0	95.2381	8.47458	0
4933404O12Rik	1.1236	1.78571	0	0	0	0	0.657895	1.5625	1.49254	0	0	9.52381	0	0
4933405D12Rik	0	0	0	0	0	0	0	0	0	0	0	0	0	0
4933405E24Rik	0	0	0	0	0	0	0	0	0	0	0	0	0	0
4933405L10Rik	0	0	0	0	0	0	0	0	0	0	1.53846	0	0	0
4933405O20Rik	0	0	0	0	0	0	0	0	0	0	0	0	0	0
4933406C10Rik	0	2.67857	0	0	0	0	0	0	0	0	0	9.52381	0	0
4933406D12Rik	0	0	0	0	0	0	0	0	0	0	0	0	0	0
4933406F09Rik	0	0	0	0	0	0	0	0	0	0	0	0	0	0
4933406G16Rik	0	0	0	0	0	0	0	0	0	0	0	0	0	0
4933406I18Rik	0	0	3.0303	0	0	0	0	0	0.746269	0	1.53846	4.7619	0	0
4933406J08Rik	0	0	0	0	0	0	0	0	0	0	0	0	0	0
4933406J10Rik	0	0	0	0	0	0	0	0	0	0	0	0	0	0
4933406K04Rik	0	0	0	0	0	0	0	0	0	0	0	0	0	0
4933406M09Rik	0	0	0	0	0	0	0	0	0	0	0	0	0	0
4933407C03Rik	53.9326	48.2143	18.1818	25.731	24.1379	24.1667	22.1491	56.25	21.6418	40.7407	13.8462	42.8571	32.2034	4
4933407E24Rik	0	0	0	0	0	0	0	0	0	0	0	0	0	0
4933407G14Rik	0	0	0	0	0	0	0	0	0	0	0	0	0	0
4933407H18Rik	13.4831	6.25	3.0303	9.35673	13.7931	12.5	11.1842	6.25	17.9104	0	6.15385	33.3333	13.5593	8
4933407I05Rik	0	0	0	0	0	0	0	0	0	0	0	0	0	0
4933407K13Rik	1.1236	1.78571	3.0303	0.584795	3.44828	1.66667	1.53509	0	2.98507	7.40741	1.53846	0	0	4
4933407L21Rik	0	0	0	0	0	0	0	0	0	0	0	0	0	0
4933407P14Rik	0	0	0	0	0	0	0	0	0	0	0	0	0	0
4933408B17Rik	0	6.25	0	0	20.6897	0	0.877193	0	1.49254	7.40741	0	23.8095	1.69492	0
4933408J17Rik	0	0	0	0	0	0	0	0	0	0	0	0	0	0
4933408N05Rik	0	0	0	0	0	0	0	0	0	0	0	0	0	0
4933409G03Rik	0	0	0	0	0	0	0	0	0	0	0	0	0	0
4933409K07Rik	0	0.892857	0	0	3.44828	0.833333	0.219298	0	0	0	0	0	0	0
4933411E08Rik	0	0	0	0	0	0	0	0	0	0	0	0	0	4
4933411G06Rik	0	0	0	0	0	0	0	0	0	0	0	0	0	0
4933411G11Rik	0	0	0	0	0	0	0	0	0	0	0	0	0	0
4933411K16Rik	0	0	0	0	0	0	0	0	0	0	0	0	0	0
4933411K20Rik	8.98876	8.92857	0	7.60234	6.89655	5	5.92105	6.25	8.20896	3.7037	0	19.0476	10.1695	4
4933412E12Rik	5.61798	0	0	2.33918	0	1.66667	13.1579	3.125	15.6716	0	3.07692	9.52381	1.69492	0
4933412E24Rik	0	0	0	0	0	0	0	0	0	0	0	0	0	0
4933412O06Rik	0	0	0	0	0	0	0	0	0	0	0	0	0	0
4933413G19Rik	0	0	0	0	0	0	0	0	0	0	0	0	0	0
4933413J09Rik	0	0	0	0.584795	0	0	0	0	0	0	0	0	0	0
4933413L06Rik	0	0	0	0	0	0	0	0	0	0	0	0	0	0
4933415F23Rik	0	0	0	0	0	0	0	0	0	0	0	0	0	0
4933416C03Rik	0	0	0	0	0	0	0	0	0	0	0	0	0	0
4933416E03Rik	0	0	0	0	0	0	0.219298	0	0	0	0	0	0	0
4933416I08Rik	0	0	0	0	0	0	0	0	0	0	0	0	0	0
4933416M06Rik	0	0	0	0	0	0	0	0	0	0	0	0	0	0
4933416M07Rik	0	0	0	0	0	0	0	0	0	0	0	0	0	0
4933417A18Rik	0	0	0	0	0	0	0	0	0	0	0	0	0	0
4933417D19Rik	0	0	0	0	0	0	0	0	0	0	0	0	0	0
4933417E11Rik	0	0.892857	0	0	0	0	0	0	0	0	0	0	0	0
4933417G07Rik	0	0	0	0	0	0	0	0	0	0	0	0	0	0
4933417O13Rik	0	0	0	0	0	0	0.219298	0	0	0	0	0	0	0
4933421E11Rik	7.86517	11.6071	9.09091	11.1111	24.1379	10.8333	8.99123	9.375	16.4179	0	6.15385	28.5714	10.1695	12
4933421I07Rik	0	0	0	0	0	0	0	0	0	0	0	0	0	0
4933421O10Rik	5.61798	3.57143	6.06061	1.16959	3.44828	3.33333	5.26316	3.125	5.22388	3.7037	3.07692	4.7619	5.08475	8
4933422A05Rik	0	0	0	0	0	0	0	0	0	0	0	0	0	0
4933422H20Rik	0	0	0	0	0	0	0	0	0	0	0	0	0	0
4933424B01Rik	5.61798	5.35714	3.0303	2.92398	3.44828	7.5	3.72807	4.6875	4.47761	7.40741	6.15385	33.3333	15.2542	4
4933424G05Rik	0	0	0	0	0	0	0	0	0	0	0	0	0	0
4933424G06Rik	0	0	0	0.584795	0	0	0	0	0	0	1.53846	0	1.69492	0
4933425B07Rik	0	0	0	0	0	0	0	0	0	0	0	0	0	0
4933425H06Rik	0	0	0	0	0	0	0	0	0	0	0	0	0	0
4933425L06Rik	0	0	0	0	0	0	0	0	0	0	0	0	0	0
4933425O20Rik	0	0	0	0	0	0	0	0	0.746269	0	0	0	0	0
4933426D04Rik	0	0	0	0	0	0	0	0	0	0	0	0	0	0
4933426M11Rik	30.3371	36.6071	12.1212	11.1111	34.4828	19.1667	23.2456	25	24.6269	18.5185	13.8462	38.0952	35.5932	44
4933427D06Rik	0	0	0	0	0	0	0	0	0	0	0	0	0	0
4933427D14Rik	0	0.892857	0	2.92398	3.44828	1.66667	1.31579	3.125	2.23881	0	1.53846	19.0476	5.08475	4
4933427E11Rik	0	0	0	0	0	0	0	0	0	0	0	0	0	0
4933427E13Rik	0	0	0	0	0	0	0	0	0	0	0	0	0	0
4933427G17Rik	1.1236	0	0	0	0	0	0.219298	0	0	0	0	0	0	0
4933427I22Rik	0	0	0	0	0	0	0	0	0	0	0	0	0	0
4933428C19Rik	0	0	0	0	0	0	0	0	0	0	0	0	0	0
4933429K18Rik	0	0	0	0	0	0	0	0	0	0	0	0	0	0
4933429O19Rik	0	0	0	0	0	0	0	0	0	0	0	0	0	0
4933430H15Rik	0	0	0	0	0	0	0	0	0	0	0	71.4286	0	0
4933430H16Rik	0	0	0	0	0	0	0	0	0	0	0	0	0	0
4933430I17Rik	0	0	0	0	0	0	0	0	0	0	0	0	0	0
4933430M04Rik	0	0	0	0	0	0	0	0	0	0	0	0	0	0
4933430N04Rik	0	0	0	0	0	0	0	0	0	0	0	0	0	0
4933431E20Rik	0	0.892857	0	0	0	0	0.877193	0	6.71642	0	1.53846	0	0	4
4933431G14Rik	0	0	0	0	0	0	0	0	0	0	0	0	0	0
4933432B09Rik	1.1236	0	0	0.584795	0	0	1.09649	0	0.746269	0	0	47.619	1.69492	0
4933432G23Rik	0	0	0	0	0	0	0	0	0	0	0	0	0	0
4933432I03Rik	0	0	0	0	0	0	0	0	0	0	0	0	0	0
4933432I09Rik	0	0	0	0	0	0	0.219298	0	0	0	0	0	0	0
4933433C11Rik	0	0	0	0	0	0	0	0	0	0	0	0	0	0
4933433F19Rik	0	0	0	0	0	0	0	0	0	0	0	0	0	0
4933433G15Rik	0	0	0	0	0	0	0.219298	0	0	0	0	4.7619	0	4
4933433G19Rik	0	0	0	0	0	0	0	0	0	0	0	0	0	0
4933433H22Rik	1.1236	0	0	0	0	0	0	0	0	0	0	0	0	0
4933433P14Rik	17.9775	17.8571	9.09091	13.4503	34.4828	15	16.2281	26.5625	25.3731	7.40741	13.8462	19.0476	11.8644	12
4933434E20Rik	44.9438	31.25	21.2121	19.2982	34.4828	25	22.5877	14.0625	26.1194	18.5185	23.0769	71.4286	32.2034	4
4933434I20Rik	0	0	0	0	0	0	0	0	0	0	0	0	0	0
4933436C20Rik	0	0	0	0	0	0	0	0	0	0	0	23.8095	30.5085	0
4933436E23Rik	0	0	0	0	0	0	0	0	0	0	0	0	0	0
4933436H12Rik	0	0	0	0	0	0	0	0	0	0	0	0	0	0
4933436I01Rik	0	0	0	0	0	0	0	0	0	0	0	0	0	0
4933437F05Rik	0	0.892857	3.0303	0	0	0	0	0	0	0	0	4.7619	0	0
4933438B17Rik	0	0	0	0	0	0	0	0	0	0	0	0	0	0
4933438K21Rik	0	0	0	0	0	0	0	0	0	0	0	0	0	0
4933439C10Rik	1.1236	0.892857	3.0303	1.75439	3.44828	0.833333	3.50877	0	2.23881	0	3.07692	9.52381	0	8
4933439F18Rik	13.4831	16.0714	6.06061	5.26316	17.2414	7.5	11.8421	4.6875	8.95522	0	10.7692	23.8095	13.5593	4
4933439K11Rik	1.1236	0.892857	0	0	3.44828	0	0	0	0	0	0	4.7619	0	0
4933440J02Rik	0	0	0	0	0	0	0	0	0	0	0	0	0	0
4933440M02Rik	0	0	0	0	0	0	0.219298	0	0	0	0	0	0	0
5031410I06Rik	0	0	0	0	0	0	0	0	0	0	0	0	0	0
5031414D18Rik	5.61798	0	24.2424	0.584795	0	0	0.219298	12.5	0	0	0	0	0	0
5031425E22Rik	22.4719	8.92857	30.303	16.3743	31.0345	16.6667	11.4035	21.875	11.9403	11.1111	6.15385	23.8095	16.9492	12
5031425F14Rik	2.24719	3.57143	6.06061	4.67836	0	0	0	0	0	0	0	0	0	0
5031426D15Rik	1.1236	0	0	1.16959	0	3.33333	51.9737	1.5625	67.1642	0	41.5385	4.7619	10.1695	0
5031434C07Rik	0	0	0	0	0	0	0	0	0	0	0	0	0	0
5031434O11Rik	0	0.892857	0	0.584795	0	0	1.53509	0	0.746269	0	1.53846	4.7619	0	0
5031439G07Rik	24.7191	21.4286	3.0303	1.16959	3.44828	3.33333	2.19298	23.4375	2.23881	0	0	0	5.08475	0
5033403H07Rik	0	0	0	0	0	0	0	0	0	0	0	0	23.7288	0
5033404E19Rik	0	0	0	0	0	0	0	0	0	0	0	0	0	0
5033406O09Rik	0	3.57143	0	0.584795	17.2414	0.833333	0	0	0	0	0	4.7619	0	0
5033411D12Rik	1.1236	0	3.0303	0	0	0	0.877193	0	0.746269	0	0	9.52381	6.77966	0
5033414D02Rik	30.3371	58.0357	42.4242	14.6199	24.1379	6.66667	17.7632	34.375	19.403	3.7037	10.7692	14.2857	16.9492	4
5133401N09Rik	38.2022	39.2857	24.2424	33.3333	44.8276	22.5	22.1491	32.8125	26.8657	14.8148	13.8462	38.0952	27.1186	24
5330411J11Rik	0	0	0	0	0	0	0	0	0	0	0	0	0	0
5330413P13Rik	0	0	0	0	0	0	0	0	0	0	0	28.5714	1.69492	0
5330417C22Rik	0	0	0	0	0	0	0.438596	0	0	0	0	9.52381	30.5085	4
5330426P16Rik	3.37079	8.03571	3.0303	0	3.44828	2.5	2.85088	0	4.47761	0	3.07692	4.7619	0	8
5330434G04Rik	0	0	0	0	0	0	0	0	0.746269	0	1.53846	4.7619	3.38983	0
5330437I02Rik	0	0	0	0	0	0	0	0	0	0	1.53846	0	0	0
5330439B14Rik	0	0	0	0	0	0	0	0	0	0	0	0	0	0
5430401F13Rik	0	0	0	0	0	0	0	0	0	0	0	0	0	0
5430402E10Rik	0	0	0	0	0	0	0	0	0	0	0	0	0	0
5430402O13Rik	0	0	0	0	0	0	0.877193	1.5625	0.746269	0	0	9.52381	3.38983	0
5430403N17	0	0	0	0	0	0	0	0	0	0	0	0	0	0
5430405G05Rik	0	0	0	0	0	0	0.219298	0	1.49254	0	0	0	0	0
5430405H02Rik	6.74157	0.892857	9.09091	3.50877	13.7931	2.5	7.01754	4.6875	3.73134	0	6.15385	14.2857	6.77966	4
5430407P10Rik	2.24719	0.892857	0	0	0	0.833333	1.53509	0	3.73134	0	4.61538	52.381	10.1695	0
5430411K18Rik	6.74157	4.46429	0	0.584795	3.44828	0.833333	4.82456	0	4.47761	0	4.61538	9.52381	6.77966	0
5430416N02Rik	4.49438	3.57143	3.0303	1.16959	6.89655	4.16667	3.07018	1.5625	2.98507	0	0	0	3.38983	0
5430416O09Rik	0	0	0	0	0	0	0.219298	0	1.49254	3.7037	0	4.7619	23.7288	28
5430417L22Rik	10.1124	8.92857	3.0303	1.75439	51.7241	15	6.14035	10.9375	2.98507	3.7037	6.15385	14.2857	11.8644	16
5430419D17Rik	0	0	0	0	0	0	0	0	0	0	0	0	0	0
5430421F17Rik	0	0	0	0	0	0	0	0	0	0	0	0	0	0
5430421N21Rik	0	0	0	0.584795	0	0	0	0	0	3.7037	0	0	0	0
5430425J12Rik	0	0	0	0	0	0	0	0	0	0	0	0	0	0
5430427M07Rik	0	0	0	0	0	0	0	0	0	0	0	0	0	0
5430427O19Rik	16.8539	7.14286	15.1515	7.01754	0	0.833333	0.438596	10.9375	0	14.8148	0	0	0	0
5430428K19Rik	0	0	0	0	0	0	0	0	0	0	0	0	0	0
5430434I15Rik	0	0	0	0	0	0	0	0	0	0	0	0	0	0
5430435G22Rik	22.4719	18.75	0	0.584795	3.44828	0	11.4035	4.6875	24.6269	0	3.07692	0	0	4
5430437J10Rik	3.37079	5.35714	0	0	0	0	0	9.375	0	3.7037	0	0	0	0
5430437P03Rik	40.4494	30.3571	6.06061	18.7135	34.4828	21.6667	15.3509	31.25	23.1343	3.7037	13.8462	80.9524	20.339	16
5430440P10Rik	0	0	0	0	0	0	0	0	0	0	0	0	0	0
5530400C23Rik	0	0	0	0	0	0	0	0	0	0	0	0	0	0
5530401A14Rik	0	0	0	0	0	0	0	0	0	0	0	0	0	0
5530601H04Rik	13.4831	6.25	6.06061	3.50877	6.89655	5	4.60526	7.8125	2.23881	0	6.15385	9.52381	11.8644	8
5730403B10Rik	7.86517	9.82143	9.09091	1.16959	24.1379	5	11.4035	1.5625	17.9104	0	6.15385	23.8095	11.8644	4
5730403I07Rik	0	0	0	0	0	0	0	0	0	0	0	4.7619	0	0
5730405O15Rik	0	0	3.0303	0	0	0.833333	0.877193	0	0.746269	0	0	0	0	0
5730408K05Rik	1.1236	3.57143	9.09091	1.16959	3.44828	0.833333	2.63158	1.5625	2.23881	0	0	0	13.5593	4
5730409E04Rik	2.24719	5.35714	0	0	3.44828	5.83333	6.14035	0	6.71642	3.7037	1.53846	0	10.1695	0
5730412P04Rik	0	0	0	0	0	0	0	0	0	0	0	0	0	0
5730416F02Rik	1.1236	0.892857	0	0	0	0	0	0	0	0	0	0	0	0
5730419I09Rik	6.74157	10.7143	12.1212	2.33918	3.44828	2.5	1.09649	3.125	4.47761	0	1.53846	42.8571	10.1695	0
5730420D15Rik	0	0	0	0	0	0.833333	0.877193	0	0	0	0	0	0	0
5730422E09Rik	0	0	0	0	0	0	0	0	0	0	0	9.52381	1.69492	0
5730435O14Rik	0	0	0	0	0	0	0	0	0	0	0	0	0	0
5730437N04Rik	28.0899	20.5357	12.1212	7.01754	24.1379	12.5	23.9035	18.75	21.6418	0	13.8462	61.9048	33.8983	12
5730455O13Rik	10.1124	9.82143	0	6.43275	10.3448	8.33333	7.23684	1.5625	2.98507	0	3.07692	28.5714	8.47458	0
5730455P16Rik	5.61798	4.46429	6.06061	4.67836	3.44828	6.66667	7.23684	3.125	9.70149	0	3.07692	4.7619	6.77966	4
5730457N03Rik	0	0	0	0	0	0	0	0	0	0	0	0	0	0
5730460C07Rik	0	0	0	0	0	0	0	0	0	0	0	0	0	0
5730469M10Rik	4.49438	7.14286	6.06061	1.75439	3.44828	3.33333	12.2807	3.125	8.20896	0	7.69231	100	30.5085	4
5730480H06Rik	1.1236	0	0	0	0	0	0.438596	3.125	0.746269	0	0	0	0	0
5730494M16Rik	15.7303	10.7143	15.1515	8.18713	10.3448	10	8.11404	6.25	10.4478	3.7037	4.61538	33.3333	1.69492	4
5730494N06Rik	25.8427	21.4286	9.09091	13.4503	17.2414	12.5	16.6667	17.1875	14.1791	0	15.3846	52.381	20.339	16
5730507C01Rik	0	11.6071	0	0	3.44828	0.833333	1.09649	1.5625	0.746269	0	0	0	1.69492	0
5730508B09Rik	22.4719	27.6786	0	5.26316	24.1379	5	1.53509	10.9375	0	3.7037	1.53846	57.1429	8.47458	12
5730522E02Rik	0	0	0	0	0	0	0	0	0	0	0	0	0	0
5730528L13Rik	6.74157	0	0	0	13.7931	4.16667	4.60526	0	5.22388	0	1.53846	9.52381	5.08475	4
5730559C18Rik	0	0	0	0	0	0	0.219298	0	0	0	0	14.2857	0	0
5730577I03Rik	1.1236	0.892857	3.0303	0	0	0.833333	1.97368	0	0	3.7037	0	4.7619	0	0
5730590G19Rik	2.24719	0.892857	0	0	0	0	0	0	0	0	0	0	0	0
5830403L16Rik	0	0	0	0	0	0	0	0	0	0	0	0	0	0
5830403M04Rik	0	0	0	0	0	0	0	0	0	0	0	0	0	0
5830411N06Rik	0	0	0	0.584795	0	0	0	0	0.746269	0	0	0	0	0
5830415F09Rik	1.1236	3.57143	3.0303	1.16959	3.44828	1.66667	2.63158	3.125	0.746269	0	1.53846	4.7619	0	0
5830416I19Rik	0	0	0	0.584795	3.44828	0	0	0	0	3.7037	0	0	1.69492	0
5830416P10Rik	7.86517	1.78571	12.1212	16.3743	0	0	0.657895	6.25	2.23881	3.7037	0	0	3.38983	4
5830417I10Rik	4.49438	4.46429	18.1818	4.09357	0	3.33333	4.38596	3.125	11.9403	3.7037	4.61538	28.5714	18.6441	0
5830418K08Rik	10.1124	5.35714	0	4.09357	6.89655	1.66667	2.63158	4.6875	2.98507	0	1.53846	9.52381	3.38983	8
5830418P13Rik	0	0	0	0	0	0	0	0	0	0	0	0	0	0
5830428M24Rik	1.1236	0	9.09091	2.33918	0	0	0.657895	1.5625	0	3.7037	0	14.2857	15.2542	0
5830432E09Rik	4.49438	2.67857	0	3.50877	0	0	0.219298	0	0	7.40741	0	0	0	0
5830433M19Rik	8.98876	12.5	12.1212	6.43275	10.3448	8.33333	6.35965	10.9375	7.46269	11.1111	7.69231	28.5714	3.38983	0
5830473C10Rik	0	0	0	0	0	0	0	0	0	0	0	0	0	0
5930403L14Rik	0	0	0	0	0	0	0	0	0.746269	0	0	14.2857	8.47458	0
5930412G12Rik	0	0	0	0	0	0	0.219298	0	4.47761	0	4.61538	0	0	0
5930416I19Rik	7.86517	12.5	0	9.35673	17.2414	4.16667	9.64912	6.25	6.71642	0	12.3077	4.7619	11.8644	0
5930434B04Rik	19.1011	8.92857	12.1212	11.6959	13.7931	10.8333	25.2193	15.625	36.5672	14.8148	21.5385	61.9048	27.1186	24
5930438M14	0	0	0	0	0	0	0	0	0	0	0	0	0	0
6030405A18Rik	0	0	0	0	0	0	0	0	0	0	0	0	0	0
6030407O03Rik	0	0	0	0.584795	0	0	0.219298	0	0	0	0	0	0	4
6030408B16Rik	1.1236	0	0	3.50877	3.44828	3.33333	36.4035	0	25.3731	0	1.53846	0	5.08475	0
6030419C18Rik	1.1236	0	0	0.584795	0	0	2.41228	0	6.71642	0	4.61538	0	20.339	0
6030422M02Rik	5.61798	1.78571	3.0303	0.584795	3.44828	0	0.657895	0	0	0	0	0	0	0
6030429G01Rik	6.74157	1.78571	0	0	0	1.66667	0.438596	1.5625	2.23881	0	1.53846	71.4286	1.69492	0
6030440G07Rik	1.1236	0	0	0.584795	0	0	0	0	0	0	0	0	0	0
6030446N20Rik	5.61798	1.78571	0	2.92398	3.44828	2.5	1.75439	1.5625	3.73134	0	4.61538	9.52381	5.08475	0
6030458C11Rik	6.74157	11.6071	0	7.60234	10.3448	9.16667	9.64912	6.25	11.9403	3.7037	4.61538	19.0476	10.1695	0
6030466F02Rik	0	0	0	0	0	0	0	0	0	0	0	0	0	0
6030468B19Rik	0	0	3.0303	0	0	0	0	0	0	0	0	0	0	0
6030498E09Rik	0	0	0	0	0	0	0	0	0	0	0	0	0	0
6230400D17Rik	0	0	0	1.75439	0	0	1.09649	0	1.49254	0	0	4.7619	0	0
6230409E13Rik	0	0	0	0	0	0	1.09649	0	1.49254	0	1.53846	4.7619	0	0
6230427J02Rik	4.49438	5.35714	0	2.33918	20.6897	3.33333	0.657895	0	2.98507	0	0	0	0	20
6330403A02Rik	1.1236	0	0	0	0	0	0	0	0	0	0	0	0	0
6330403K07Rik	0	0	0	1.16959	6.89655	0	3.50877	0	4.47761	3.7037	63.0769	0	0	0
6330406I15Rik	0	0.892857	0	0	0	0.833333	9.42982	1.5625	58.209	0	26.1538	0	0	0
6330407A03Rik	43.8202	28.5714	15.1515	0	3.44828	2.5	1.09649	23.4375	0.746269	3.7037	0	4.7619	0	0
6330407J23Rik	0	0	0	0	0	0	0.219298	0	0.746269	0	0	0	0	0
6330408A02Rik	0	0	0	0.584795	0	1.66667	3.07018	1.5625	1.49254	0	0	9.52381	3.38983	0
6330409D20Rik	0	0	0	0	0	0.833333	0	0	0	0	0	0	0	0
6330409N04Rik	5.61798	11.6071	3.0303	1.75439	24.1379	9.16667	4.16667	0	7.46269	0	6.15385	19.0476	6.77966	4
6330410L21Rik	0	0	0	0	0	0	0	0	0	0	0	0	0	0
6330415B21Rik	0	0	0	0	0	0	0.219298	0	0	0	0	0	0	0
6330416G13Rik	16.8539	25	0	0.584795	10.3448	0.833333	0.219298	6.25	0	0	1.53846	19.0476	8.47458	0
6330418K02Rik	10.1124	3.57143	0	3.50877	0	2.5	2.41228	4.6875	0.746269	3.7037	3.07692	9.52381	3.38983	4
6330439K17Rik	0	0	0	0	0	0.833333	1.31579	0	1.49254	0	3.07692	47.619	0	0
6330503K22Rik	1.1236	5.35714	0	1.75439	3.44828	2.5	2.41228	0	3.73134	3.7037	4.61538	23.8095	15.2542	4
6330512M04Rik	0	1.78571	0	0.584795	0	0	0	1.5625	0	0	1.53846	0	0	0
6330527O06Rik	0	0	0	0	0	0	0	0	0	0	0	0	0	0
6330545A04Rik	1.1236	0	0	0	0	0	0	0	0.746269	0	3.07692	4.7619	0	0
6330549D23Rik	1.1236	0	3.0303	0	3.44828	0.833333	0.657895	0	0	0	0	4.7619	0	0
6330578E17Rik	30.3371	41.0714	6.06061	25.731	13.7931	9.16667	20.3947	28.125	26.8657	0	13.8462	23.8095	45.7627	12
6430411K18Rik	0	0	0	0	0	0	0	0	0	0	0	0	0	0
6430527G18Rik	15.7303	15.1786	24.2424	33.3333	55.1724	25.8333	44.7368	14.0625	56.7164	3.7037	49.2308	66.6667	55.9322	24
6430531B16Rik	3.37079	1.78571	0	0	0	0	0.219298	0	0.746269	0	1.53846	42.8571	0	0
6430548G04	0	0	0	0	0	0	0	0	0	0	0	0	0	0
6430548M08Rik	24.7191	12.5	0	0.584795	3.44828	28.3333	1.09649	28.125	1.49254	14.8148	0	0	1.69492	4
6430550D23Rik	0	0	0	0.584795	0	0	0	1.5625	0	0	0	0	1.69492	4
6430562O15Rik	0	0	0	0	0	0	0	0	0	0	1.53846	0	0	0
6430571L13Rik	0	0	0	0.584795	0	0	0	0	0	0	0	0	0	0
6430573F11Rik	0	0	0	0	0	0	0	0	0	0	0	9.52381	0	0
6430584L05	0	0	0	0	0	0	0.219298	0	0	0	0	0	0	0
6430598A04Rik	2.24719	0	0	0	0	0	1.53509	0	0.746269	0	1.53846	0	1.69492	0
6430704M03Rik	0	0	0	0	0	0	0	0	0	0	0	0	0	0
6430706D22Rik	0	0.892857	0	0	0	0	0	0	0	0	0	0	0	0
6530401N04Rik	12.3596	6.25	3.0303	4.09357	13.7931	14.1667	8.99123	10.9375	8.20896	0	12.3077	19.0476	11.8644	12
6530402F18Rik	2.24719	0	0	1.16959	0	1.66667	1.09649	9.375	0	7.40741	0	0	0	0
6530411M01Rik	0	0	0	0	0	0	0	0	0	0	0	0	0	0
6530418L21Rik	0	0.892857	3.0303	0	0	0.833333	0.219298	0	0.746269	3.7037	6.15385	23.8095	18.6441	28
6530439I21	1.1236	0	0	0	0	0	0	0	0	0	0	0	0	0
6720401G13Rik	3.37079	7.14286	0	1.16959	10.3448	1.66667	3.50877	1.5625	0.746269	0	0	28.5714	18.6441	0
6720456B07Rik	98.8764	91.0714	72.7273	59.6491	79.3103	56.6667	58.9912	84.375	60.4478	55.5556	46.1538	66.6667	76.2712	40
6720456H20Rik	1.1236	10.7143	0	1.75439	6.89655	3.33333	5.48246	6.25	5.22388	0	3.07692	19.0476	8.47458	0
6720463M24Rik	1.1236	0.892857	3.0303	0	0	0	0	0	0	0	0	0	0	0
6720468P15Rik	0	0	0	0	0	0	0	0	0	0	0	0	0	0
6720483E21Rik	0	0	0	0	0	0	0	0	0	0	0	0	3.38983	0
6720489N17Rik	1.1236	11.6071	0	0.584795	3.44828	1.66667	2.19298	3.125	2.98507	0	3.07692	0	0	0
6820408C15Rik	0	0	3.0303	0	0	0	0	0	0	0	0	71.4286	1.69492	0
6820431F20Rik	37.0787	26.7857	18.1818	19.2982	41.3793	34.1667	38.1579	26.5625	41.791	7.40741	23.0769	71.4286	42.3729	48
7420426K07Rik	0	0	0	0	0	0	0	0	0	0	0	0	0	0
7420461P10Rik	0	0	0	0	0	0	0	0	0	0	0	0	1.69492	0
7420700N18Rik	0	0	0	0	0	0	0	0	0	0	0	0	0	0
7420701I03Rik	0	0	0	0	0	0	0	0	0	0	0	0	0	0
7530416G11Rik	0	0	0	0	0	0	0	0	0	0	0	0	0	0
7530420F21Rik	0	0	0	0	0	0	0	0	0.746269	0	0	0	5.08475	0
7630403G23Rik	0	0	0	0	0	0	0	0	0	0	0	0	0	0
8030411F24Rik	0	0	0	0	0	0	0	0	0	0	0	0	0	0
8030423F21Rik	0	0	0	0	0	0	0.438596	0	0	0	0	0	0	0
8030423J24Rik	0	0	0	0	0	0	0	0	0	0	0	0	0	0
8030442B05Rik	0	0	0	0	0	0	0.219298	0	0	0	0	0	0	0
8030443G20Rik	0	0	0	0	0	0	0	0	0	0	0	0	0	0
8030462N17Rik	5.61798	1.78571	3.0303	1.16959	0	0	0.219298	0	0.746269	0	0	0	0	0
8430403D17Rik	0	0	0	0	0	0	1.97368	0	0	0	0	0	0	12
8430406I07Rik	4.49438	10.7143	0	7.01754	13.7931	5	7.89474	4.6875	11.194	3.7037	4.61538	9.52381	3.38983	12
8430408G22Rik	3.37079	0.892857	0	0	13.7931	23.3333	1.31579	1.5625	0.746269	0	0	33.3333	11.8644	0
8430410A17Rik	8.98876	8.03571	6.06061	9.35673	13.7931	8.33333	6.14035	6.25	4.47761	3.7037	10.7692	38.0952	8.47458	0
8430410K20Rik	11.236	6.25	3.0303	4.67836	17.2414	14.1667	6.57895	3.125	10.4478	0	6.15385	42.8571	16.9492	8
8430419L09Rik	3.37079	8.92857	3.0303	0.584795	3.44828	0	0.877193	0	0	0	0	4.7619	1.69492	0
8430422H06Rik	0	0	0	0	0	0	0	0	0	0	0	0	0	0
8430423G03Rik	1.1236	0	0	0	0	0	0.219298	0	0.746269	0	0	0	0	0
8430427H17Rik	0	18.75	0	0.584795	3.44828	3.33333	2.19298	4.6875	0	0	0	9.52381	5.08475	0
8430429K09Rik	6.74157	2.67857	6.06061	0.584795	0	0.833333	1.97368	4.6875	4.47761	0	0	33.3333	6.77966	4
8430431K14Rik	0	0	0	0	3.44828	0.833333	2.19298	0	0	0	1.53846	0	0	16
8430436N08Rik	0	0	0	0	0	0	0	0	0	0	0	0	0	0
8430437L04Rik	0	0	0	0	0	0	0	0	0	0	0	0	0	0
9030025P20Rik	3.37079	0	0	2.33918	3.44828	0.833333	3.07018	1.5625	2.23881	0	0	0	1.69492	0
9030204H09Rik	0	0	0	0	0	0	0	0	0	0	0	0	0	0
9030224M15Rik	1.1236	0.892857	0	0.584795	20.6897	7.5	23.0263	0	8.95522	0	9.23077	4.7619	1.69492	0
9030404E10Rik	0	0	0	0.584795	0	0	0	4.6875	0	0	0	4.7619	0	0
9030418K01Rik	3.37079	9.82143	3.0303	0	0	0.833333	2.41228	0	0	0	0	0	0	0
9030425E11Rik	2.24719	8.03571	0	0.584795	0	0	15.3509	1.5625	14.1791	0	0	0	0	0
9030612E09Rik	0	0	0	0	0	0	0.219298	0	0	0	0	0	0	0
9030617O03Rik	5.61798	11.6071	0	3.50877	3.44828	0	1.31579	1.5625	1.49254	0	1.53846	4.7619	0	0
9030619P08Rik	1.1236	0	0	0	0	0	0	0	0	0	0	0	0	0
9030624G23Rik	1.1236	1.78571	0	1.16959	3.44828	1.66667	0.657895	1.5625	2.23881	0	1.53846	0	0	0
9030624J02Rik	22.4719	31.25	12.1212	11.1111	20.6897	15	9.42982	9.375	4.47761	0	7.69231	14.2857	11.8644	8
9030625A04Rik	8.98876	0.892857	3.0303	0	0	0	2.41228	9.375	2.98507	0	1.53846	0	0	0
9130008F23Rik	1.1236	1.78571	0	0	0	1.66667	3.50877	1.5625	2.98507	0	0	4.7619	5.08475	0
9130011E15Rik	4.49438	0.892857	0	0	0	0.833333	0.877193	0	1.49254	0	0	0	3.38983	0
9130011J15Rik	51.6854	40.1786	9.09091	18.7135	62.069	27.5	49.7807	25	54.4776	3.7037	36.9231	80.9524	50.8475	12
9130014G24Rik	1.1236	2.67857	0	0	0	0	0.219298	0	0.746269	0	0	57.1429	0	0
9130015A21Rik	0	0	0	0	0	0	0	0	0	0	0	4.7619	0	0
9130015L21Rik	0	0	0	0	0	0	0	0	0	0	0	0	0	0
9130017N09Rik	0	0	0	0	0	0	0.219298	0	0	0	0	33.3333	8.47458	0
9130019O22Rik	1.1236	0.892857	0	0	10.3448	1.66667	2.63158	1.5625	4.47761	0	4.61538	4.7619	3.38983	4
9130019P16Rik	0	0	0	0.584795	0	0	0	0	0	0	0	0	0	0
9130023H24Rik	2.24719	2.67857	0	2.33918	0	1.66667	1.31579	0	2.23881	0	0	9.52381	6.77966	4
9130024F11Rik	0	0	0	0	0	0	0	0	0	0	0	0	0	0
9130204L05Rik	0	0	0	0	0	0	0	0	0	0	0	0	0	0
9130206I24Rik	4.49438	0.892857	0	3.50877	0	4.16667	0.438596	1.5625	9.70149	0	1.53846	0	0	0
9130209A04Rik	0	0	0	0	0	0	0	0	0	0	0	0	0	0
9130221F21Rik	0	0	0	0	0	0	0.219298	0	0	0	0	0	0	0
9130221H12Rik	0	3.57143	0	1.75439	0	2.5	2.63158	1.5625	2.23881	0	0	4.7619	3.38983	0
9130227L01Rik	0	0	0	0	0	0	0	0	0	0	0	0	0	0
9130230L23Rik	0	0	0	0	0	0	0	0	0	0	0	47.619	0	0
9130401M01Rik	34.8315	41.0714	9.09091	8.18713	20.6897	10.8333	13.1579	21.875	19.403	0	3.07692	28.5714	16.9492	12
9130404H23Rik	0	0	0	0	0	0	0	0	0	0	0	0	0	0
9130409I23Rik	0	0	0	0	0	0	0	0	0	0	0	4.7619	0	0
9230009I02Rik	0	0	0	0	0	0	0	0	0	0	0	0	0	0
9230102K24Rik	0	0	0	0	0	0	0	0	0	0	0	0	0	0
9230102O04Rik	0	0	0	0	0	0	0	0	0	0	0	0	0	0
9230104L09Rik	0	0	0	0.584795	0	5	0.438596	0	0	3.7037	0	4.7619	1.69492	76
9230105E05Rik	0	0	0	0	0	0	0	0	0	0	0	0	0	0
9230110C19Rik	0	0	0	0	0	0	0.438596	0	0	0	0	38.0952	0	0
9230110F15Rik	0	0	0	0	0	0	0	0	0	0	0	0	0	0
9230112D13Rik	0	0	0	0	0	0	0	0	0	0	0	0	0	0
9230112J17Rik	0	0	0	0	0	0	0	0	0	0	0	0	0	0
9230114K14Rik	1.1236	0.892857	3.0303	0	6.89655	2.5	7.01754	0	3.73134	0	3.07692	28.5714	0	0
9230115E21Rik	0	0	0	0	0	0	0	0	0	0	0	0	0	0
9230116N13Rik	5.61798	0	3.0303	0.584795	0	0.833333	0.657895	1.5625	0	0	0	4.7619	0	0
9330020H09Rik	2.24719	3.57143	0	1.16959	0	1.66667	0.877193	1.5625	1.49254	0	0	0	1.69492	0
9330111N05Rik	0	0	0	0	0	0	0	0	0	0	0	0	0	0
9330117O12	0	0	0	0	0	0	0	0	0	0	0	0	0	0
9330133O14Rik	10.1124	1.78571	0	4.09357	6.89655	4.16667	2.41228	7.8125	0	3.7037	0	14.2857	5.08475	0
9330151L19Rik	8.98876	5.35714	3.0303	1.16959	13.7931	2.5	6.35965	4.6875	7.46269	0	4.61538	4.7619	6.77966	4
9330158H04Rik	0	0	0	0	0	0.833333	0.657895	0	0.746269	0	0	0	1.69492	0
9330159F19Rik	1.1236	0	0	0	0	0	17.1053	1.5625	13.4328	0	3.07692	0	0	0
9330159M07Rik	1.1236	1.78571	0	0	0	0	1.09649	1.5625	3.73134	0	0	0	5.08475	0
9330162B11Rik	0	0	0	0	0	0	0	0	0	0	0	0	0	0
9330175E14Rik	0	0	0	0	0	0	0	1.5625	0	0	0	0	0	0
9330175M20Rik	0	0	0	0	0	0	0	0	0	0	0	0	0	0
9330178D15Rik	0	0	0	0	0	0	0	0	0	0	0	0	0	0
9330179D12Rik	0	3.57143	0	0.584795	0	0	2.41228	0	1.49254	0	0	0	0	0
9330182L06Rik	1.1236	0	0	0	0	0	0	0	0	0	0	0	11.8644	0
9330182O14Rik	0	0	0	0	0	0	0	0	0	0	0	0	0	0
9430007A20Rik	0	0	0	0	0	0	0	0	0	0	0	0	0	0
9430008C03Rik	3.37079	3.57143	6.06061	4.67836	0	4.16667	5.92105	1.5625	2.98507	0	4.61538	0	6.77966	4
9430014N10Rik	0	0	0	0	0	0	0	0	0	0	0	0	0	0
9430015G10Rik	4.49438	2.67857	0	2.33918	0	1.66667	1.09649	0	0.746269	0	1.53846	4.7619	1.69492	8
9430016H08Rik	19.1011	14.2857	9.09091	7.01754	34.4828	8.33333	13.8158	9.375	9.70149	0	7.69231	19.0476	16.9492	4
9430018G01Rik	0	0	0	0	0	0	0	0	0	0	0	0	0	0
9430019J16Rik	0	0	0	0	0	0	0	0	0	0	0	0	0	0
9430020K01Rik	10.1124	7.14286	3.0303	0.584795	34.4828	39.1667	11.8421	6.25	29.1045	11.1111	13.8462	9.52381	16.9492	4
9430021M05Rik	0	0	0	0	0	0	0	0	0	0	0	0	0	0
9430023L20Rik	34.8315	25.8929	6.06061	12.8655	34.4828	19.1667	14.0351	18.75	13.4328	25.9259	6.15385	23.8095	18.6441	8
9430031J16Rik	0	0	0	0	0	0	0	0	0	0	0	0	0	0
9430032N09Rik	0	0	0	0	0	0	0	0	0	0	0	0	0	0
9430037G07Rik	0	0.892857	0	0	0	0	0.219298	0	2.23881	0	0	0	0	0
9430038I01Rik	25.8427	14.2857	15.1515	5.84795	24.1379	6.66667	7.01754	7.8125	4.47761	0	7.69231	4.7619	3.38983	0
9430041J12Rik	0	0	0	0	0	0	0	0	0	0	0	0	0	0
9430060I03Rik	2.24719	1.78571	0	1.16959	0	0	0.219298	0	0	0	0	0	0	0
9430069I07Rik	0	0.892857	0	0	0	0	0	0	0	0	0	0	0	0
9430076C15Rik	0	7.14286	0	0	0	0.833333	0	0	2.23881	0	0	0	0	0
9430076G02Rik	0	0	0	0	0	0	0	0	0	0	0	0	0	0
9430083A17Rik	0	0	0	0	0	0	0.438596	0	0	0	1.53846	4.7619	5.08475	0
9430091E24Rik	1.1236	0.892857	3.0303	1.75439	0	0	0.877193	0	0	0	3.07692	4.7619	0	0
9530002B09Rik	0	0	0	0	0	0	0	0	0	0	0	0	0	0
9530003J23Rik	0	0	0	0	0	0	0	0	0	0	0	0	8.47458	0
9530008L14Rik	0	8.03571	0	0	0	0	0.219298	0	0	0	0	0	0	0
9530026F06Rik	0	0	0	0	0	0	0	0	0	0	0	0	0	0
9530026P05Rik	0	0.892857	0	0	0	1.66667	5.70175	0	2.98507	0	0	14.2857	0	0
9530027J09Rik	0	0	0	0	0	0	0.219298	0	0	0	0	0	0	0
9530036O11Rik	0	0	0	0	0	0	0	0	0	0	0	9.52381	6.77966	0
9530048J24Rik	2.24719	0	0	0	0	0.833333	5.92105	1.5625	1.49254	0	3.07692	0	5.08475	8
9530051G07Rik	0	0	0	0	0	0	0.219298	0	0	0	0	9.52381	1.69492	0
9530052E02Rik	0	0	0	0	0	0	0	0	0	0	0	0	0	0
9530053A07Rik	1.1236	0.892857	0	0	0	0.833333	0.219298	0	0	0	0	85.7143	0	0
9530059O14Rik	1.1236	2.67857	0	0	0	0	0	0	0	0	0	0	0	0
9530068E07Rik	56.1798	49.1071	15.1515	24.5614	37.931	21.6667	41.4474	34.375	43.2836	14.8148	30.7692	85.7143	61.0169	24
9530077C05Rik	0	0	0	0.584795	0	0	1.09649	0	1.49254	3.7037	4.61538	23.8095	1.69492	0
9530080O11Rik	0	0	0	0	0	0	0	0	0	0	0	0	0	0
9530082P21Rik	1.1236	0.892857	0	0	0	3.33333	1.97368	0	0	0	0	0	1.69492	0
9530091C08Rik	0	0	0	0	0	5.83333	30.7018	0	35.8209	0	27.6923	9.52381	11.8644	28
9630013A20Rik	0	0	0	0	0	0	0	0	0	0	0	0	0	0
9630028B13Rik	0	0	0	0	0	0	0	0	0	0	0	0	0	0
9630028H03Rik	0	0	0	0	0	0	0	0	0	0	0	0	0	0
9630033F20Rik	3.37079	22.3214	0	2.92398	3.44828	1.66667	1.53509	6.25	3.73134	0	0	0	6.77966	0
9830001H06Rik	15.7303	22.3214	6.06061	0.584795	31.0345	11.6667	34.4298	3.125	22.3881	7.40741	12.3077	9.52381	15.2542	36
9830107B12Rik	0	0	0	0	3.44828	0.833333	0.219298	3.125	0	0	0	0	0	0
9830132P13	0	0	0	0	0	0	0	0	0	0	0	0	0	0
9830147E19Rik	0	0.892857	0	0	3.44828	2.5	5.04386	0	2.23881	0	1.53846	9.52381	0	0
9830166K06Rik	0	0	0	0	0	0	0	0	0	0	0	4.7619	0	0
9930005F22Rik	0	0	0	0	0	0	0	0	0	0	0	0	0	0
9930012K11Rik	2.24719	0.892857	0	0.584795	27.5862	2.5	0.877193	0	0.746269	0	0	0	8.47458	0
9930013L23Rik	0	0	0	0	0	0	0.219298	0	0	0	0	0	0	0
9930014A18Rik	1.1236	0	3.0303	1.16959	3.44828	2.5	0.219298	1.5625	0	0	0	23.8095	10.1695	0
9930021D14Rik	0	0	0	0	0	0	0	0	0	0	0	0	0	0
9930021J03Rik	10.1124	15.1786	15.1515	6.43275	20.6897	5.83333	11.8421	10.9375	14.1791	0	12.3077	19.0476	16.9492	4
9930023K05Rik	1.1236	0	0	0	0	0	0	0	0	0	0	0	0	0
9930104L06Rik	1.1236	6.25	9.09091	3.50877	0	2.5	4.60526	3.125	0.746269	0	3.07692	0	5.08475	8
9930111J21Rik1	1.1236	1.78571	3.0303	0.584795	0	1.66667	0.219298	1.5625	0	0	0	0	0	4
9930111J21Rik2	2.24719	0.892857	0	0.584795	0	0	0	0	0	0	0	0	0	4
a	0	0	0	0.584795	0	0	0	0	0	0	0	0	0	0
A030009H04Rik	3.37079	2.67857	0	0	6.89655	0	0.438596	1.5625	4.47761	3.7037	1.53846	19.0476	1.69492	0
A130010J15Rik	5.61798	3.57143	6.06061	1.16959	3.44828	2.5	3.50877	0	1.49254	0	0	9.52381	5.08475	12
A130022J15Rik	2.24719	0	0	1.75439	0	2.5	2.19298	0	1.49254	0	0	9.52381	1.69492	12
A130040M12Rik	38.2022	23.2143	27.2727	45.614	27.5862	29.1667	24.7807	31.25	38.0597	88.8889	1.53846	23.8095	50.8475	36
A130049A11Rik	1.1236	0	3.0303	1.75439	0	0	0.219298	0	0	0	0	4.7619	0	0
A130077B15Rik	1.1236	0.892857	0	0.584795	0	1.66667	0.219298	4.6875	0.746269	0	0	0	0	4
A1bg	0	0	0	0	0	0	0	0	0	0	0	0	0	0
A1cf	0	0	0	0	0	0	0	0	0	0	0	0	0	0
A230001M10Rik	0	0	0	0	0	0	0	0	0	0	0	0	0	0
A230020J21Rik	0	0	0	0	0	0	0	0	0	0	0	4.7619	0	0
A230028O05Rik	0	0.892857	0	0	0	0	0	0	0	0	0	0	0	0
A230046K03Rik	29.2135	27.6786	12.1212	14.0351	13.7931	6.66667	15.3509	20.3125	14.9254	3.7037	4.61538	19.0476	27.1186	4
A230050P20Rik	6.74157	9.82143	0	2.92398	10.3448	7.5	11.1842	4.6875	13.4328	3.7037	15.3846	9.52381	6.77966	16
A230051G13Rik	2.24719	2.67857	0	1.16959	0	0	1.09649	3.125	1.49254	0	0	0	3.38983	0
A230056J06Rik	0	0	0	0	0	0.833333	0	0	0	0	0	0	0	0
A230056P14Rik	1.1236	0	0	0.584795	3.44828	0	0.219298	0	0	0	0	0	0	0
A230057D06Rik	0	0	0	0	0	0.833333	6.14035	0	2.23881	0	0	19.0476	1.69492	0
A230065H16Rik	0	0	0	0	0	0	0.657895	0	0	0	0	0	0	0
A230070E04Rik	0	0	0	0	0	0	0	0	0	0	0	0	0	0
A230072C01Rik	1.1236	0.892857	3.0303	0.584795	3.44828	6.66667	5.70175	3.125	5.22388	0	4.61538	0	1.69492	4
A230072E10Rik	2.24719	0	0	0	0	0	0	0	0	0	0	0	0	0
A230073K19Rik	1.1236	0	0	0	0	0	0	0	0	0	0	0	0	0
A230077H06Rik	0	0	0	0	0	0	0	0	0	0	0	0	0	0
A230108P19Rik	0	0	0	0	0	0	0	0	0	0	0	0	0	0
A2ld1	0	0	0	3.50877	3.44828	0	4.38596	0	3.73134	0	0	28.5714	6.77966	0
A2m	0	0	0	0	0	0	0	0	0	0	0	0	0	0
A330009N23Rik	6.74157	0.892857	0	0	13.7931	6.66667	1.31579	0	3.73134	3.7037	0	0	0	0
A330021E22Rik	0	0	0	0	3.44828	0.833333	0.438596	0	0.746269	0	0	57.1429	3.38983	0
A330023F24Rik	0	0	0	1.75439	10.3448	0	2.41228	0	1.49254	7.40741	0	4.7619	1.69492	0
A330032B11Rik	0	0	0	0	3.44828	0	0.219298	0	0	0	0	0	1.69492	0
A330035P11Rik	0	0	0	0.584795	0	0	0	0	0	0	0	0	0	0
A330040F15Rik	0	0.892857	0	0	0	0	0	3.125	2.23881	0	0	4.7619	0	0
A330041J22Rik	0	0	0	0	0	0	0.657895	0	0	0	0	4.7619	3.38983	0
A330048O09Rik	0	0	0	0	0	0	0	0	0	0	1.53846	0	0	0
A330049M08Rik	1.1236	0.892857	0	0.584795	0	0	0.219298	0	0	0	0	9.52381	0	0
A330049N07Rik	0	0	0	0	0	0	0	0	0	0	0	0	0	0
A330050B17Rik	0	0	0	0	0	0	0	0	0.746269	0	0	0	1.69492	0
A330050F15Rik	0	0	0	0	0	0	0	0	0	0	0	0	0	0
A330069E16Rik	2.24719	0.892857	3.0303	3.50877	0	0	2.41228	0	0	0	1.53846	4.7619	3.38983	0
A330070K13Rik	0	0	0	0	0	0	0	0	0	0	0	0	0	0
A330076C08Rik	0	0	0	0	0	0	0	0	0	0	0	0	0	0
A330076H08Rik	0	0	0	0.584795	0	0.833333	41.886	1.5625	9.70149	0	1.53846	19.0476	1.69492	0
A330093E20Rik	0	0	0	0	0	0	0	0	0	0	0	0	0	0
A330102I10Rik	0	0	0	0	0	0	0.219298	0	0.746269	0	0	0	0	0
A3galt2	0	0	0	0	0	0	0.219298	0	0	0	0	0	1.69492	0
A430005L14Rik	20.2247	25	9.09091	11.1111	31.0345	13.3333	14.4737	15.625	23.1343	3.7037	20	23.8095	16.9492	16
A430033K04Rik	1.1236	2.67857	0	1.75439	0	1.66667	1.75439	1.5625	1.49254	0	3.07692	14.2857	3.38983	0
A430035B10Rik	2.24719	0	9.09091	0.584795	6.89655	0.833333	0.657895	1.5625	0	0	0	14.2857	1.69492	0
A430071A18Rik	0	0	0	0	0	0	0.438596	1.5625	0	0	0	33.3333	0	0
A430078G23Rik	2.24719	0	6.06061	9.35673	0	0	0	0	0	0	0	4.7619	0	0
A430084P05Rik	16.8539	38.3929	12.1212	26.9006	0	0	0.438596	0	0	0	1.53846	0	0	0
A430088P11Rik	0	0	0	0.584795	0	0	0	0	0	0	0	14.2857	0	0
A430089I19Rik	0	0	0	0	0	0	0	0	0	0	0	0	0	0
A430090L17Rik	0	0	0	0	0	0	0	0	0	0	0	0	0	0
A430092G05Rik	0	0	0	0	0	0	0	0	0	0	0	0	0	0
A430093F15Rik	1.1236	0	0	2.33918	0	0	0	1.5625	0	0	0	0	0	0
A430105I19Rik	1.1236	0.892857	0	0	24.1379	14.1667	5.26316	0	3.73134	0	1.53846	0	1.69492	4
A430107O13Rik	1.1236	8.03571	0	0.584795	6.89655	0.833333	31.1404	0	44.7761	7.40741	1.53846	4.7619	3.38983	0
A430107P09Rik	0	0	0	0	0	0	0	0	0	0	0	0	0	0
A430110N23Rik	1.1236	0	0	0.584795	0	0	7.01754	1.5625	11.194	0	23.0769	0	0	0
A4galt	1.1236	0	0	0.584795	44.8276	13.3333	14.4737	0	6.71642	3.7037	4.61538	4.7619	0	24
A4gnt	0	0	0	0	0	0	0	0	0	0	0	0	0	0
A530006G24Rik	0	0	0	0	0	0	0	0	0	0	0	0	0	0
A530013C23Rik	2.24719	4.46429	0	0.584795	0	0	2.63158	7.8125	2.23881	0	0	4.7619	0	0
A530016L24Rik	0	0	0	0	0	0	0	0	0	0	0	0	0	0
A530032D15Rik	6.74157	0	6.06061	0	0	0	0	1.5625	0	3.7037	0	0	0	0
A530046M15	0	0	0	0	0	0	0	0	0	0	0	0	0	0
A530050N04Rik	0	0	0	0	0	0	0	0	0	0	0	0	0	0
A530053G22Rik	0	0	0	0	0	0	0	0	0	0	0	0	0	0
A530054K11Rik	4.49438	3.57143	3.0303	4.09357	3.44828	0.833333	3.94737	1.5625	1.49254	0	1.53846	9.52381	5.08475	0
A530058N18Rik	0	0	0	0	0	0	0	0	0	0	0	0	0	0
A530064D06Rik	8.98876	0	0	0	3.44828	0	0	7.8125	0	11.1111	0	0	0	0
A530065N20	0	0	0	0	0	0	0	0	0	0	0	0	0	0
A530072M11Rik	0	0	0	0.584795	0	0	0.877193	0	0	0	1.53846	0	0	0
A530088E08Rik	1.1236	0	0	10.5263	0	0	0	0	0	0	0	0	0	0
A530098C11Rik	0	0	0	0	0	0	0	0	0	0	0	0	0	0
A530099J19Rik	5.61798	0	0	0	0	0	0	0	0	0	0	0	0	0
A630001G21Rik	23.5955	8.92857	24.2424	9.94152	3.44828	0	0.219298	9.375	1.49254	0	0	0	1.69492	0
A630007B06Rik	12.3596	3.57143	3.0303	4.67836	13.7931	6.66667	9.86842	1.5625	5.22388	0	10.7692	9.52381	6.77966	4
A630010A05Rik	0	0	0	0	0	0	0	0	0	0	0	4.7619	0	0
A630012P03Rik	0	0	0	0	0	0	0	0	0	0	0	0	0	0
A630019I02Rik	0	0	0	0	0	0	0	0	0	0	0	0	0	0
A630020A06	0	0	0	0	0	0	0	0	0	0	0	4.7619	0	0
A630023A22Rik	0	0	0	0	0	0	0	0	0	0	0	0	0	0
A630033H20Rik	11.236	22.3214	0	4.67836	0	0	0	10.9375	0.746269	0	0	0	0	0
A630055G03Rik	2.24719	2.67857	0	2.33918	0	0	0	1.5625	0.746269	0	0	0	3.38983	0
A630066F11Rik	4.49438	1.78571	0	0	6.89655	1.66667	1.53509	1.5625	2.23881	3.7037	0	9.52381	5.08475	4
A630072M18Rik	8.98876	3.57143	12.1212	14.6199	20.6897	11.6667	8.11404	1.5625	5.22388	3.7037	4.61538	19.0476	0	20
A630073D07Rik	0	0	0	0	0	0	0	0	0	0	0	0	0	0
A630075F10Rik	0	0	0	0	0	0	0	0	0	0	0	0	0	0
A630076J17Rik	0	0	0	0	0	0	0	0	0	0	0	0	0	0
A630077J23Rik	0	0	0	0	0	0	0	0	0	0	0	0	0	12
A630089N07Rik	6.74157	0.892857	3.0303	1.75439	3.44828	0	0.877193	3.125	1.49254	0	0	4.7619	3.38983	0
A630095E13Rik	0	0	0	0	0	0	0	0	0	0	0	0	0	0
A630095N17Rik	0	0	0	0	0	0	0	0	0	0	0	0	0	0
A730008H23Rik	0	0	0	0.584795	0	0	0.219298	0	0	0	0	0	0	0
[truncated: 21,435 more rows]

## Sheet: Skeletal muscle
Supplementary File 10C. The percentage of cells that express a gene per cell type in skeletal muscle.
Gene symbol	vein endothelial cell; endothelial stalk cell	capillary endothelial cell	pericyte cell	CD8-positive, alpha-beta T cell	B cell	skeletal muscle fibroblast; fibroblast	monocyte-derived dendritic cell	endothelial cell of artery	skeletal muscle fibroblast; fibroblast	tendon cell	smooth muscle cell	skeletal muscle satellite cell	blood vessel endothelial cell	macrophage	striated muscle cell	endothelial cell of lymphatic vessel	myelinating Schwann cell	T-helper 17 cell	stromal cell
0610005C13Rik	0	0.168067	0	0.342466	0	0	0	0	0	0	0	0	0	0	0	0	0	0	0
0610007C21Rik	42.3729	29.916	28.3951	11.3014	17.8344	60.8076	28.3688	32.5843	64.4269	70.5729	41.6667	26.4205	18.5676	42.3313	13.8889	50.9091	56.6667	30	63.6364
0610007L01Rik	30.5085	8.23529	17.9012	14.726	15.4989	28.9786	37.5887	15.1685	32.0158	34.375	12.5	32.3864	7.69231	12.8834	8.33333	25.4545	20	16.6667	42.4242
0610007N19Rik	2.54237	0	24.0741	0.342466	2.9724	55.4632	4.96454	1.68539	47.8261	51.3021	45.8333	3.69318	0.795756	4.29448	5.55556	7.27273	30	3.33333	48.4848
0610007P08Rik	3.38983	1.51261	3.08642	2.05479	2.9724	4.75059	2.12766	1.68539	4.34783	4.6875	4.16667	2.55682	0.795756	3.06748	0	5.45455	0	0	0
0610007P14Rik	10.1695	4.20168	8.64198	9.58904	14.2251	12.5891	27.6596	3.93258	16.2055	13.2812	12.5	7.95455	2.12202	5.52147	0	7.27273	6.66667	6.66667	27.2727
0610007P22Rik	3.38983	2.85714	6.17284	10.6164	7.85563	5.22565	9.21986	5.61798	9.09091	8.59375	0	8.23864	0.530504	7.36196	5.55556	0	6.66667	13.3333	9.09091
0610008F07Rik	0	0	0	0	0	0	0	0	0	0	0	0	0	0	0	0	0	0	0
0610009B14Rik	0	0	0	0	0	0	0	0	0	0	0	0	0	0	0	0	0	0	0
0610009B22Rik	7.62712	3.69748	6.17284	2.39726	2.54777	8.4323	5.67376	5.05618	14.2292	6.77083	8.33333	4.26136	0.795756	6.13497	25	5.45455	3.33333	0	15.1515
0610009D07Rik	49.1525	24.2017	29.6296	39.3836	41.189	44.8931	64.539	34.2697	61.2648	49.2188	29.1667	41.1932	22.0159	44.7853	22.2222	30.9091	43.3333	53.3333	27.2727
0610009L18Rik	0	1.0084	3.7037	1.36986	2.33546	3.68171	5.67376	0	7.11462	2.86458	4.16667	3.40909	0	3.68098	16.6667	5.45455	0	0	3.0303
0610009O20Rik	13.5593	9.7479	6.17284	3.42466	2.9724	7.95724	5.67376	9.55056	12.253	13.2812	4.16667	5.11364	6.1008	5.52147	11.1111	10.9091	6.66667	0	12.1212
0610010B08Rik	0	0	0	0	0.424628	0.356295	0.70922	0	0.790514	0.520833	0	0	0	0.613497	0	0	0	0	0
0610010F05Rik	1.69492	3.69748	3.08642	1.71233	0.212314	7.00713	2.83688	3.37079	7.11462	8.07292	0	3.125	3.71353	4.90798	0	0	0	0	9.09091
0610010K14Rik	42.3729	20.5042	11.1111	25.6849	20.5945	28.9786	43.2624	25.8427	46.6403	31.5104	20.8333	19.0341	14.8541	40.4908	11.1111	29.0909	10	13.3333	33.3333
0610010O12Rik	0.847458	0	3.7037	0.342466	0.212314	0.593824	0.70922	1.1236	0	1.5625	0	1.70455	0.265252	0	11.1111	0	3.33333	0	0
0610011F06Rik	3.38983	1.84874	4.93827	13.6986	8.9172	11.9952	7.0922	2.24719	17.3913	25	8.33333	11.6477	2.38727	5.52147	8.33333	5.45455	6.66667	10	12.1212
0610011L14Rik	9.32203	6.55462	2.46914	5.13699	6.58174	3.80048	9.92908	10.6742	7.90514	3.90625	0	6.53409	4.77454	6.13497	5.55556	10.9091	10	16.6667	9.09091
0610012G03Rik	22.0339	18.9916	10.4938	17.1233	14.862	22.6841	34.0426	10.6742	40.3162	21.6146	8.33333	13.0682	8.75332	39.2638	36.1111	20	13.3333	13.3333	21.2121
0610012H03Rik	0	0	0	0.342466	0	0	0	0	0.395257	0	0	0	0	0	0	0	0	0	0
0610030E20Rik	6.77966	5.88235	5.55556	11.9863	17.4098	9.50119	14.8936	7.86517	13.0435	9.89583	12.5	12.7841	3.44828	11.6564	8.33333	0	26.6667	13.3333	15.1515
0610031J06Rik	32.2034	26.3866	12.963	19.5205	17.6221	30.7601	34.0426	24.1573	30.4348	42.1875	25	10.2273	16.4456	43.5583	8.33333	38.1818	23.3333	13.3333	39.3939
0610031O16Rik	0	0	0	0	0	0	0	0	0	0	0	0	0	0	0	0	0	0	0
0610037L13Rik	20.339	9.91597	9.87654	8.56164	10.6157	28.1473	20.5674	16.8539	37.9447	26.3021	25	23.8636	7.95756	17.1779	5.55556	25.4545	20	0	21.2121
0610037P05Rik	9.32203	7.22689	12.963	9.93151	7.21868	15.5582	15.6028	5.05618	16.6008	15.3646	25	5.11364	4.50928	9.20245	25	12.7273	13.3333	16.6667	6.06061
0610038B21Rik	0	0	0	0.342466	0	0.118765	0	0	0.395257	0	0	0	0	0	0	0	0	0	0
0610038L08Rik	0	0	0	0	0	0	0	0	0	0	0	0	0	0	0	0	0	0	0
0610039K10Rik	0	0.672269	0	0	0	0.118765	0	0	0	0	0	0	0	0.613497	0	0	0	0	0
0610040B10Rik	0	0.168067	0	0.684932	0.636943	0.475059	0.70922	0	0	0.260417	0	0.284091	0.265252	0	8.33333	0	0	0	0
0610040F04Rik	0	0	0	0	0	0.118765	0	0	0	0	0	0	0	0	0	0	0	0	0
0610040J01Rik	0	0	0	0	0	0	0	0	0	0.260417	0	0	0	0	5.55556	0	0	0	0
0610043K17Rik	7.62712	2.35294	0	0.342466	0.212314	4.51306	1.41844	3.93258	2.37154	3.64583	0	2.55682	5.57029	1.22699	0	0	0	0	6.06061
0910001L09Rik	25.4237	11.7647	8.02469	17.4658	16.5605	31.4727	41.1348	16.8539	40.7115	39.0625	25	15.3409	7.1618	46.6258	22.2222	40	13.3333	10	30.303
100043387	2.54237	1.51261	1.23457	2.39726	0.212314	3.20665	4.96454	1.1236	1.18577	3.64583	4.16667	1.42045	0	0.613497	0	5.45455	3.33333	3.33333	0
1100001G20Rik	0	0	0	0	0.849257	0.118765	0.70922	0	0.395257	0	0	0	0	0	0	0	0	0	0
1110001A16Rik	9.32203	6.38655	4.32099	9.24658	10.6157	7.83848	12.766	5.05618	11.0672	9.11458	12.5	3.40909	3.18302	14.7239	27.7778	9.09091	10	10	6.06061
1110001J03Rik	38.9831	11.2605	25.3086	17.1233	19.7452	39.7862	37.5887	17.9775	51.7787	40.8854	37.5	34.6591	12.4668	20.2454	47.2222	16.3636	33.3333	30	27.2727
1110002B05Rik	41.5254	32.9412	25.9259	34.2466	24.8408	56.2945	45.3901	36.5169	62.4506	54.1667	41.6667	22.4432	20.9549	40.4908	11.1111	67.2727	56.6667	70	60.6061
1110002L01Rik	0.847458	0.336134	1.23457	0.342466	1.06157	1.06888	0.70922	0	1.58103	0.520833	0	1.13636	0	0	2.77778	7.27273	3.33333	0	0
1110002N22Rik	0.847458	0.504202	1.85185	2.73973	0.849257	2.3753	1.41844	1.68539	1.18577	2.08333	0	1.13636	0	1.22699	2.77778	0	3.33333	0	0
1110003E01Rik	60.1695	35.2941	43.8272	23.6301	73.2484	79.3349	58.156	33.1461	92.8854	73.9583	58.3333	34.9432	27.321	42.3313	8.33333	45.4545	40	43.3333	63.6364
1110004E09Rik	9.32203	4.70588	5.55556	5.47945	3.39703	10.8076	3.5461	11.236	11.4625	11.4583	0	6.53409	2.38727	3.06748	19.4444	18.1818	10	10	15.1515
1110004F10Rik	31.3559	22.6891	22.8395	23.2877	24.8408	37.5297	35.461	21.3483	45.8498	42.4479	37.5	36.3636	11.1406	26.3804	22.2222	40	33.3333	40	45.4545
1110005A03Rik	14.4068	10.2521	8.64198	39.726	29.724	20.7838	31.2057	10.6742	29.249	28.125	4.16667	17.0455	7.42706	17.7914	44.4444	9.09091	10	26.6667	15.1515
1110006O24Rik	0.847458	0.168067	0	0	0.849257	0.593824	1.41844	0.561798	1.58103	0.260417	0	0	0.795756	0.613497	0	0	0	0	0
1110007C09Rik	46.6102	24.7059	21.6049	16.4384	13.3758	25.5344	68.0851	44.382	33.9921	34.6354	29.1667	8.80682	18.5676	75.4601	47.2222	20	33.3333	20	33.3333
1110008F13Rik	32.2034	12.1008	24.6914	27.3973	26.9639	35.9857	52.4823	18.5393	42.6877	37.7604	25	25	11.1406	30.6748	30.5556	25.4545	16.6667	33.3333	36.3636
1110008J03Rik	3.38983	1.34454	1.85185	0.684932	0.424628	3.08789	0.70922	1.68539	3.16206	2.86458	4.16667	3.69318	1.06101	0.613497	0	0	6.66667	0	0
1110008L16Rik	1.69492	0.336134	0.617284	1.0274	1.27389	0.712589	2.12766	3.93258	1.58103	2.60417	8.33333	1.13636	0	1.84049	0	3.63636	3.33333	0	0
1110008P14Rik	21.1864	7.89916	6.17284	12.6712	19.7452	19.1211	29.7872	16.2921	26.8775	23.4375	8.33333	10.7955	7.95756	14.1104	22.2222	30.9091	16.6667	23.3333	6.06061
1110012J17Rik	1.69492	0	1.85185	0	0.424628	2.019	0	2.24719	8.3004	5.98958	0	0.568182	0.265252	0	0	0	0	6.66667	3.0303
1110012L19Rik	4.23729	4.03361	4.32099	4.79452	4.03397	6.4133	6.38298	1.68539	11.4625	7.03125	0	7.38636	2.38727	4.29448	8.33333	3.63636	6.66667	0	6.06061
1110014N23Rik	8.47458	6.72269	6.17284	4.10959	2.76008	8.19477	14.8936	5.05618	8.3004	8.07292	0	6.81818	3.97878	9.20245	0	3.63636	3.33333	3.33333	6.06061
1110015O18Rik	0	0	0	0	0	0	0	0	0	0	0	0	0	0	0	0	0	0	0
1110017D15Rik	0.847458	0	0	0	0	0.118765	0	0	0	0.520833	0	0.284091	0.265252	0	0	0	0	0	0
1110017F19Rik	0	0	0	0	0	0	0	0	0	0	0	0	0	0	0	3.63636	0	0	0
1110018G07Rik	4.23729	1.0084	2.46914	1.36986	1.91083	2.49406	3.5461	1.68539	3.16206	1.5625	0	0.284091	0.530504	2.45399	0	1.81818	0	6.66667	0
1110018J18Rik	2.54237	2.68908	3.08642	1.36986	2.76008	3.56295	4.25532	0	3.16206	4.6875	4.16667	2.55682	1.06101	4.29448	0	1.81818	6.66667	13.3333	6.06061
1110019D14Rik	1.69492	0.168067	0.617284	0.342466	0.636943	1.78147	0	0	2.37154	0.78125	0	0.568182	0	2.45399	2.77778	1.81818	0	0	3.0303
1110020A21Rik	0	0.672269	0.617284	1.0274	0.636943	0.831354	2.83688	0	0.395257	0.78125	0	0.852273	0.265252	0.613497	5.55556	0	0	0	0
1110020G09Rik	0.847458	2.01681	1.23457	3.42466	4.03397	4.75059	5.67376	2.80899	6.32411	6.77083	0	7.10227	1.85676	0.613497	5.55556	1.81818	3.33333	6.66667	6.06061
1110021J02Rik	3.38983	2.85714	1.23457	3.08219	2.12314	5.70071	6.38298	4.49438	6.71937	8.07292	4.16667	2.27273	2.65252	1.84049	2.77778	7.27273	0	0	0
1110021L09Rik	5.08475	1.68067	1.85185	0	0.212314	3.91924	0.70922	1.68539	3.16206	2.86458	0	1.70455	0.530504	3.68098	0	1.81818	0	0	6.06061
1110028C15Rik	14.4068	5.71429	5.55556	4.79452	4.24628	8.07601	7.80142	10.1124	11.0672	11.1979	4.16667	9.375	11.9363	11.0429	0	7.27273	10	10	27.2727
1110028F11Rik	0	0	0	0.342466	0.212314	0	0	0	0	0	0	0	0	0	0	0	0	0	0
1110028F18Rik	0	0	0	0	0	0	0	0	0	0	0	0	0	0	0	0	0	0	0
1110031I02Rik	12.7119	3.19328	1.85185	1.36986	4.03397	2.96912	3.5461	6.17978	3.55731	9.89583	8.33333	4.54545	1.85676	5.52147	0	7.27273	6.66667	6.66667	0
1110032A03Rik	6.77966	2.85714	1.85185	2.05479	2.54777	5.81948	5.67376	3.93258	4.74308	4.42708	8.33333	1.98864	1.06101	7.97546	2.77778	5.45455	16.6667	0	9.09091
1110032A04Rik	0	0	0	0	0	0	0	0	0	0	0	0	0	0	0	0	0	0	0
1110032F04Rik	0.847458	0	0	2.05479	0	0	2.83688	0	0	0.260417	0	0	0	0	0	3.63636	0	0	3.0303
1110034A24Rik	1.69492	1.51261	2.46914	3.76712	3.39703	4.98812	3.5461	0.561798	3.55731	2.34375	0	1.13636	2.12202	1.22699	2.77778	3.63636	0	0	6.06061
1110034B05Rik	6.77966	4.03361	5.55556	4.45205	2.12314	3.08789	2.83688	2.24719	4.34783	5.20833	0	3.97727	1.32626	2.45399	5.55556	7.27273	0	3.33333	3.0303
1110034G24Rik	1.69492	2.52101	1.85185	11.3014	4.24628	2.49406	4.96454	2.24719	4.74308	2.86458	8.33333	1.98864	0.530504	1.84049	2.77778	3.63636	10	10	3.0303
1110035M17Rik	0	0.504202	0	0	0	0.356295	2.83688	0	0	1.04167	0	0.284091	0	4.29448	2.77778	0	0	0	0
1110036E04Rik	0	0	0	0	0	0	0	0	0	0	0	0	0	0	0	0	0	0	0
1110037F02Rik	4.23729	1.84874	4.32099	4.79452	3.60934	5.34442	7.80142	2.80899	5.92885	7.55208	8.33333	3.69318	1.85676	5.52147	0	5.45455	3.33333	13.3333	6.06061
1110038B12Rik	15.2542	10.7563	9.87654	17.1233	11.465	20.7838	29.7872	11.236	24.5059	24.2188	8.33333	41.7614	3.18302	17.7914	8.33333	16.3636	30	10	15.1515
1110038D17Rik	4.23729	1.68067	8.64198	7.19178	11.0403	2.96912	13.4752	1.68539	2.7668	2.08333	12.5	1.70455	1.32626	4.29448	8.33333	9.09091	3.33333	3.33333	0
1110038F14Rik	8.47458	22.1849	16.6667	13.0137	12.3142	14.3705	12.766	10.1124	18.5771	19.5312	16.6667	13.0682	6.36605	11.0429	5.55556	10.9091	30	23.3333	27.2727
1110046J04Rik	0	0.504202	5.55556	0	0	4.86936	0	0.561798	5.92885	3.64583	4.16667	0.568182	0	1.84049	0	3.63636	10	0	3.0303
1110049F12Rik	5.08475	5.37815	3.7037	8.56164	11.6773	8.31354	19.8582	2.24719	5.92885	15.1042	25	8.80682	2.91777	7.97546	8.33333	5.45455	16.6667	23.3333	6.06061
1110050K14Rik	0	0	0	0	0	0	0	0	0	0	0	0	0	0	0	0	0	0	0
1110051M20Rik	4.23729	0.672269	1.23457	1.71233	0.424628	6.7696	4.25532	1.1236	12.6482	8.85417	4.16667	3.69318	1.32626	1.22699	0	5.45455	16.6667	0	6.06061
1110054M08Rik	3.38983	1.84874	1.23457	3.08219	0.636943	4.98812	2.12766	2.80899	5.5336	5.20833	4.16667	1.42045	1.06101	1.84049	13.8889	0	0	0	12.1212
1110054O05Rik	0	1.17647	2.46914	3.08219	7.64331	2.25653	3.5461	0.561798	1.97628	1.82292	0	3.125	0.265252	3.68098	0	1.81818	0	10	0
1110057K04Rik	5.08475	3.86555	4.32099	5.13699	4.4586	7.12589	11.3475	3.37079	10.2767	11.7188	12.5	5.11364	1.59151	7.97546	0	0	3.33333	3.33333	6.06061
1110058L19Rik	12.7119	6.38655	3.08642	7.19178	5.9448	14.0143	14.8936	1.68539	20.5534	8.33333	8.33333	2.27273	1.59151	12.2699	19.4444	9.09091	0	6.66667	12.1212
1110059E24Rik	11.8644	10.084	14.8148	11.3014	17.8344	12.4703	17.7305	10.1124	15.0198	10.9375	20.8333	4.54545	4.77454	6.74847	2.77778	16.3636	6.66667	0	24.2424
1110059G10Rik	8.47458	5.88235	7.40741	5.47945	9.76645	7.83848	14.1844	6.17978	11.8577	7.55208	16.6667	8.23864	3.71353	6.74847	0	14.5455	10	3.33333	12.1212
1110059M19Rik	0	0	0	0	0	0	0	0	0	0	0	0	0	0	0	0	0	0	0
1110065P20Rik	9.32203	3.52941	7.40741	4.79452	2.9724	15.7957	19.8582	3.93258	16.996	24.7396	12.5	10.7955	3.18302	8.58896	16.6667	3.63636	13.3333	3.33333	30.303
1110067D22Rik	6.77966	6.72269	26.5432	1.0274	0.636943	13.7767	4.25532	8.42697	8.69565	14.0625	12.5	1.98864	4.50928	1.22699	27.7778	3.63636	6.66667	0	15.1515
1190002F15Rik	1.69492	0	0.617284	4.10959	1.91083	1.30641	10.6383	1.1236	1.97628	1.5625	4.16667	3.40909	0.530504	1.22699	0	0	0	10	0
1190002H23Rik	39.8305	93.9496	21.6049	37.6712	9.97877	31.3539	36.8794	60.1124	26.8775	71.3542	16.6667	16.1932	93.634	29.4479	22.2222	18.1818	86.6667	43.3333	45.4545
1190002N15Rik	4.23729	15.9664	4.93827	5.47945	2.12314	17.5772	6.38298	6.17978	18.5771	15.8854	0	9.65909	8.75332	1.22699	2.77778	14.5455	3.33333	16.6667	0
1190003J15Rik	0	0	1.23457	0	0.849257	0.118765	0	0	0	0	0	0	0	0	0	0	0	0	0
1190003K10Rik	0	0	0	0	0	0	0	0	0	0	0	0	0	0	0	0	0	0	0
1190005F20Rik	3.38983	3.19328	4.32099	6.84932	4.4586	3.68171	10.6383	6.17978	3.55731	3.90625	0	4.54545	1.06101	4.29448	2.77778	7.27273	10	3.33333	6.06061
1190005I06Rik	0	0	0.617284	0	0.424628	0.356295	0	0.561798	0.395257	1.04167	0	0.284091	0	0	2.77778	1.81818	0	6.66667	0
1190007F08Rik	0	0.840336	7.40741	0	0.424628	16.9834	2.83688	0	18.5771	3.64583	12.5	0.568182	0	4.29448	0	0	0	3.33333	12.1212
1190007I07Rik	4.23729	1.84874	4.93827	6.50685	3.39703	3.32542	7.80142	2.24719	3.95257	6.77083	8.33333	2.84091	0.795756	2.45399	25	3.63636	0	3.33333	0
1200009I06Rik	21.1864	2.01681	3.08642	0.342466	0	9.73872	3.5461	12.9213	8.3004	4.42708	0	1.98864	5.30504	4.90798	0	7.27273	3.33333	0	3.0303
1200011I18Rik	10.1695	1.84874	0.617284	3.42466	3.82166	5.10689	20.5674	4.49438	6.32411	4.16667	0	1.13636	2.38727	4.90798	0	5.45455	0	0	15.1515
1200011M11Rik	2.54237	1.17647	1.23457	0.684932	1.27389	1.42518	5.67376	1.68539	2.37154	1.30208	0	2.84091	0.265252	3.68098	0	0	0	3.33333	6.06061
1200014J11Rik	2.54237	3.19328	4.32099	3.76712	3.39703	3.68171	10.6383	3.93258	4.34783	3.38542	4.16667	1.98864	1.32626	6.74847	2.77778	3.63636	3.33333	13.3333	6.06061
1200016B10Rik	6.77966	12.7731	7.40741	17.1233	11.465	13.0641	21.2766	11.7978	11.0672	8.59375	4.16667	22.4432	5.83554	12.8834	2.77778	16.3636	10	0	9.09091
1300001I01Rik	0.847458	1.51261	3.08642	1.36986	3.18471	3.80048	7.0922	3.37079	5.92885	5.46875	8.33333	6.25	1.06101	1.84049	2.77778	5.45455	3.33333	10	0
1300002E11Rik	6.77966	7.05882	6.79012	8.21918	5.73248	10.8076	7.80142	5.05618	13.4387	13.2812	8.33333	7.10227	2.91777	5.52147	0	5.45455	3.33333	16.6667	6.06061
1300002K09Rik	0	0	0	0	0	0.118765	0	0	0	0	0	0	0	0	0	0	0	0	0
1300010F03Rik	2.54237	1.34454	3.7037	0.342466	0.424628	3.80048	1.41844	0.561798	3.55731	5.20833	4.16667	3.125	1.59151	2.45399	0	1.81818	3.33333	3.33333	3.0303
1300014I06Rik	67.7966	41.8487	25.3086	7.19178	14.862	39.1924	17.0213	53.9326	38.3399	53.9062	25	62.5	65.252	20.2454	5.55556	63.6364	36.6667	76.6667	21.2121
1300015D01Rik	0	0	0.617284	0	0	0.23753	0	0	0	0	0	0.284091	0	0	0	0	0	0	0
1300017J02Rik	0	0	0	0.342466	0	0	0	0	0	0	0	0	0	0	0	0	0	0	0
1300018I17Rik	2.54237	3.19328	2.46914	1.71233	1.27389	3.80048	5.67376	1.68539	5.5336	2.60417	4.16667	3.125	1.32626	7.36196	2.77778	1.81818	6.66667	0	6.06061
1300018J18Rik	2.54237	3.19328	5.55556	3.42466	2.33546	5.81948	8.51064	2.80899	7.50988	7.8125	4.16667	2.55682	0.795756	3.06748	8.33333	5.45455	6.66667	3.33333	3.0303
1500001M20Rik	5.9322	2.35294	2.46914	3.42466	1.91083	2.73159	2.12766	3.37079	3.95257	4.6875	4.16667	1.70455	1.85676	2.45399	0	1.81818	3.33333	0	0
1500002O10Rik	0	0	0	0	0	0	0	0	0	0	0	0	0	0	0	0	0	0	0
1500002O20Rik	6.77966	3.36134	2.46914	5.13699	3.60934	6.17577	8.51064	3.93258	3.16206	10.6771	8.33333	3.125	4.24403	12.8834	2.77778	3.63636	3.33333	6.66667	12.1212
1500003O03Rik	28.8136	12.437	25.9259	18.1507	15.2866	40.1425	53.1915	18.5393	64.4269	39.5833	37.5	53.4091	10.0796	23.3129	11.1111	16.3636	33.3333	26.6667	21.2121
1500004A13Rik	0	0	0	0	0	0.23753	0.70922	0	0.790514	0.260417	0	0	0	0	0	0	0	0	0
1500009C09Rik	0	0	0	0	0	0	0	0	0	0	0	0	0	0	0	0	0	0	0
1500009L16Rik	0.847458	0	15.4321	0.684932	0.212314	8.66983	4.96454	0.561798	12.6482	2.60417	8.33333	0.284091	0	0.613497	0	3.63636	3.33333	6.66667	27.2727
1500010J02Rik	2.54237	1.34454	0.617284	0.684932	1.4862	2.25653	4.96454	1.1236	2.7668	1.82292	0	1.42045	1.85676	3.68098	0	0	6.66667	0	3.0303
1500011B03Rik	2.54237	1.34454	1.23457	4.10959	3.18471	1.42518	6.38298	0.561798	3.16206	1.82292	0	0.852273	0.265252	2.45399	0	1.81818	0	0	3.0303
1500011H22Rik	5.9322	2.35294	7.40741	6.50685	2.9724	7.83848	7.80142	3.93258	10.2767	10.9375	20.8333	7.10227	4.77454	5.52147	0	9.09091	13.3333	16.6667	12.1212
1500011K16Rik	23.7288	10.5882	14.1975	13.6986	5.09554	18.4086	28.3688	13.4831	26.8775	16.6667	25	14.7727	7.95756	25.1534	52.7778	25.4545	40	16.6667	18.1818
1500012F01Rik	44.0678	26.0504	25.3086	52.3973	39.0658	45.8432	65.2482	30.3371	58.1028	50.7812	16.6667	72.1591	27.0557	37.4233	11.1111	38.1818	16.6667	20	33.3333
1500012K07Rik	0	0	0	0	0	0	0.70922	0	0	0.260417	0	0	0	0	0	0	0	0	0
1500015A07Rik	1.69492	0.336134	0	1.71233	2.9724	0.712589	2.83688	0.561798	0.790514	0.520833	0	2.55682	0.795756	6.13497	2.77778	5.45455	0	0	0
1500015L24Rik	0	0	0	0	0	0.118765	0	0	0.395257	0	0	0	0	0	0	0	0	0	0
1500015O10Rik	1.69492	1.51261	3.08642	3.42466	3.60934	9.02613	7.80142	3.93258	5.5336	65.1042	16.6667	5.11364	2.12202	5.52147	0	1.81818	0	3.33333	0
1500016L03Rik	0	0	0	0	0	0	0	0	0	0	0	0	0	0	0	0	0	0	0
1500017E21Rik	0.847458	0	0.617284	0	0	0.118765	0	0	0.395257	0.260417	0	0	0	0	0	0	0	0	0
1500031L02Rik	0.847458	1.34454	1.23457	3.42466	2.54777	3.68171	5.67376	0	7.50988	2.08333	4.16667	1.42045	0	2.45399	5.55556	0	3.33333	3.33333	6.06061
1500032L24Rik	52.5424	36.8067	39.5062	44.1781	28.4501	68.5273	88.6525	43.8202	79.4466	70.0521	45.8333	63.6364	33.687	65.0307	58.3333	63.6364	56.6667	56.6667	60.6061
1520402A15Rik	0	1.17647	3.7037	0	0.212314	0.23753	0.70922	7.86517	0	0.520833	0	0.284091	0.265252	0	0	0	6.66667	0	0
1600002D24Rik	0	0	0	0	0	0	0	0	0	0	0	0	0	0	0	0	0	0	0
1600002H07Rik	0.847458	0.336134	0.617284	0.342466	1.06157	1.66271	3.5461	0	0.395257	1.82292	0	0.568182	0	0.613497	2.77778	1.81818	3.33333	0	0
1600002K03Rik	1.69492	3.02521	0.617284	8.21918	2.9724	8.31354	13.4752	3.37079	5.5336	12.2396	0	3.40909	1.06101	11.6564	0	7.27273	0	3.33333	0
1600010M07Rik	0	0	0.617284	0	0	0.356295	13.4752	0	0	0	0	0	0	7.36196	0	0	0	0	0
1600012F09Rik	5.9322	4.87395	6.17284	4.10959	5.30786	10.095	6.38298	2.80899	11.8577	10.6771	16.6667	11.9318	1.85676	6.13497	2.77778	5.45455	23.3333	3.33333	15.1515
1600012H06Rik	3.38983	8.7395	8.02469	5.13699	7.85563	7.36342	12.0567	5.61798	11.0672	10.6771	4.16667	9.375	2.12202	12.2699	5.55556	7.27273	6.66667	13.3333	9.09091
1600014C10Rik	0	2.85714	4.32099	7.53425	4.03397	3.68171	6.38298	4.49438	2.7668	3.38542	4.16667	0.568182	0.795756	1.22699	5.55556	0	3.33333	6.66667	9.09091
1600014C23Rik	0	0	0	0	0	0	0	0	0	0	0	0	0	0	0	0	0	0	0
1600014K23Rik	0	0	0	0	0	0	0	0	0	0	0	0	0	0	0	0	0	0	0
1600015I10Rik	0	0	1.23457	0	0	0	0	0	0	0.260417	0	0	0	0	0	0	0	0	0
1600016N20Rik	0	0	0	0	0.636943	0	0.70922	0	0	0	0	0	0	0	0	0	0	0	0
1600019K03Rik	0	0	0	0	0	0	0	0	0	0	0	0	0	0	0	0	0	0	0
1600020E01Rik	3.38983	4.36975	5.55556	4.45205	5.30786	6.88836	4.96454	3.93258	7.90514	9.11458	4.16667	7.10227	1.59151	4.90798	5.55556	3.63636	3.33333	0	9.09091
1600021P15Rik	2.54237	1.34454	1.23457	0	0.212314	2.019	0.70922	1.68539	2.7668	2.60417	4.16667	1.42045	1.06101	1.22699	0	3.63636	10	0	0
1600025M17Rik	0	0	0	0	0	0	0	0	0	0	0	0	0	0	0	0	0	0	0
1600027N09Rik	0	0	0	0	0.636943	0	0	0	0.395257	0	0	0	0	0	0	0	0	0	0
1600029D21Rik	0	0	0	0	0.212314	0.356295	4.25532	0.561798	3.55731	0.260417	8.33333	1.13636	0	0	0	0	0	0	0
1600029I14Rik	0	0	0	0	0	0.118765	1.41844	0	0	0	0	0	0	0	0	0	0	0	0
1600029O15Rik	0.847458	0.672269	0	2.05479	0.212314	1.66271	0	1.1236	4.74308	0.520833	0	0.852273	1.32626	0	0	0	0	0	0
1700001C02Rik	0	0	0	0	0	0	0	0	0	0	0	0	0	0	0	0	0	0	0
1700001C19Rik	0	0	0	0	0	0	0.70922	0.561798	0	0	0	0	0	0	0	0	0	0	0
1700001D01Rik	0	0	0	0	0	0	0	0	0	0	0	0	0	0	0	0	0	0	0
1700001F09Rik	0	0	0	0	0	0	0	0	0	0	0	0	0	0	0	0	0	0	0
1700001G11Rik	0	0	0	0.342466	0	0.118765	0	0	0.395257	0	0	0	0	0	0	0	0	0	0
1700001G17Rik	0	0	0	0	0	0	0	0	0.395257	0	0	0	0	0	0	0	0	0	0
1700001J03Rik	0	0	0	0	0	0.118765	0	0	0	0	0	0	0	0	0	0	0	0	0
1700001J11Rik	0	0	0	0	0	0	0	0	0	0	0	0	0	0	2.77778	0	0	0	0
1700001K19Rik	0	0.336134	0	0	0	0	0	0	0	0	0	0	0.265252	0	0	1.81818	0	0	0
1700001K23Rik	0	0	0	0	0	0.118765	0	0	0	0	0	0	0	0	0	0	0	0	0
1700001L05Rik	0	0	0.617284	0.342466	0	0.475059	0.70922	0.561798	0	0.520833	0	0	0	0	0	1.81818	0	0	0
1700001L19Rik	0	0	1.23457	0	0	0.118765	0	0	0	0.260417	0	0.284091	0	0	0	0	0	0	0
1700001O22Rik	0.847458	0	0	0	0	0.23753	0	0.561798	0.395257	0	0	0	0	0	0	0	3.33333	3.33333	0
1700001P01Rik	0	0.168067	0	0	0	0.23753	0.70922	0	0	0	0	0.284091	0	0	0	0	0	0	0
1700003C15Rik	0	0	0	0	0	0	0	0	0	0	0	0	0	0	0	0	0	0	0
1700003D09Rik	0	0	0	0	0	0	0	0	0	0	0	0	0	0	0	0	0	0	0
1700003E16Rik	0	0	0	0	0	0.118765	0	0	0	0	0	0	0	0	0	0	0	0	0
1700003F12Rik	0	0	0	0	0	0.23753	0	0	7.11462	0	0	0.284091	0.265252	1.22699	0	0	0	0	0
1700003F17Rik	0	0.504202	0	0	0	0	0	0.561798	0	0	0	0	0.795756	0	0	0	0	0	0
1700003G13Rik	0	0	0	0	0	0	0	0	0	0.260417	0	0	0	0	0	0	0	0	0
1700003G18Rik	0	0	0	0	0	0	0	0	0	0	0	0	0	0	0	0	0	0	0
1700003H04Rik	0	0	0	0	0	0	0	0	0	0	0	0	0	0	0	0	0	0	0
1700003L19Rik	0	0	0	0	0	0	0	0	0	0	0	0	0	0	0	0	0	0	0
1700003M02Rik	0	0	0	0	0	0	0	0	0	0	0	0.284091	0	0	0	0	0	0	0
1700003M07Rik	0	0	0	0	0.212314	0	0	0	0	0.260417	0	0	0	0	0	0	0	0	0
1700003P14Rik	0	0	0	0	0	0	0	0	0	0	0	0	0	0	0	0	0	0	0
1700006A11Rik	0	0	0	0	0	0	0	0	0	0	0	0	0	0	0	0	0	0	0
1700006E09Rik	0	0	0	0	0	0	0	0	0	0	0	0	0	0	0	0	0	0	0
1700006F04Rik	0	0	0	0	0	0	0	0	0	0	0	0.284091	0	0	0	0	0	0	0
1700006H21Rik	0	0	0	0	0	0.118765	0	0	0	0	0	0	0.265252	0	0	0	0	0	0
1700007B14Rik	0	0.336134	0.617284	0	0	0	0	0	0	0.260417	0	0.568182	0.265252	0	0	0	0	0	0
1700007F19Rik	0	0	0	0	0	0	0	0	0	0	0	0	0	0	0	0	0	0	0
1700007G11Rik	0	0	0.617284	0	0	0.356295	0	0	0.395257	0	0	0	0	0	0	0	3.33333	0	0
1700007I08Rik	0	0	0	0	0	0	0	0	0	0	0	0	0	0	0	0	0	0	0
1700007J10Rik	0	0	0	0	0	0	0	0	0	0	0	0	0	0	0	0	0	0	0
1700007K09Rik	0	0	0	0	0	0.118765	0	0	0.395257	0	0	0	0	0	0	0	0	0	0
1700007K13Rik	0	0	2.46914	0	0	0	0	0	0	0	0	0	0	0	0	0	0	0	0
1700007L15Rik	2.54237	0	0.617284	0.684932	1.06157	0.23753	2.83688	0	0	0	4.16667	0.284091	0	0.613497	2.77778	0	3.33333	0	0
1700007P06Rik	0	0	0	0	0	0	0	0	0	0	0	0	0	0	0	0	0	0	0
1700008A04Rik	0	0	0	0	0	0	0	0	0	0	0	0	0	0	0	0	0	0	0
1700008F21Rik	0	0	0	0	0	0	0	0	0	0	0	0	0	0	0	0	0	0	0
1700008I05Rik	0	0	0	0	0	0	0	0	0	0	0	0	0	0	0	0	0	0	0
1700008J07Rik	0	1.17647	1.23457	2.39726	1.4862	1.90024	4.96454	0.561798	0.790514	2.60417	0	0	1.59151	1.22699	0	3.63636	0	3.33333	0
1700008K24Rik	0	0	0	0	0	0	0	0	0	0	0	0	0	0	0	0	0	0	0
1700008O03Rik	0	0	0	0	0	0	1.41844	0	0	0.260417	4.16667	0	0	0	0	0	0	0	0
1700008P02Rik	0	0	0	0	0	0	0	0	0	0	0	0	0	0	0	0	0	0	0
1700008P20Rik	0	0	0	0	0	0	0	0	0	0	0	0	0	0	0	0	0	0	0
1700009C05Rik	0	0	0	0	0	0	0	0	0	0	0	0	0	0	0	0	0	0	0
1700009J07Rik	0	0	0	0	0	0	0	0	0	0	0	0	0	0	0	0	0	0	0
1700009N14Rik	0	0	0	0	0	0	0	0	0	0	0	0	0	0	0	0	0	0	0
1700009P17Rik	0	0.168067	0	0	0.212314	0.475059	3.5461	0.561798	0	0.520833	0	0.568182	0.265252	0.613497	0	0	0	0	0
1700010B08Rik	0	0	0	0	0	0	0	0	0	0	0	0	0	0	0	0	0	0	0
1700010D01Rik	0	0	0	0	0	0	0	0	0	0	0	0	0	0	0	0	0	0	0
1700010I02Rik	0	0	0	0	0	0	0	0	0	0	0	0	0	0	0	0	0	0	0
1700010I14Rik	0	0	0	0.342466	0.212314	0	0	0	0	0.260417	0	0	0	0	0	0	0	0	0
1700010J16Rik	0	0	0	0	0	0	0	0	0	0	0	0	0	0	0	0	0	0	0
1700010K23Rik	0	0	0	0	0	0	0	0	0	0	0	0	0	0	0	0	0	0	0
1700010M22Rik	0	0	0	0	0	0	0	0	0	0	0	0	0	0	0	0	0	0	0
1700011A15Rik	0	0	0	0	0	0	0	0	0	0	0	0	0	0	0	0	0	0	0
1700011B04Rik	0	0	0	0	0	0	0	0	0	0	0	0	0	0	0	0	0	0	0
1700011E24Rik	0	0	0	0	0	0	0.70922	0	0	0	0	0	0	0	0	0	0	0	0
1700011F03Rik	0	0	0	0	0	0	0	0	0	0	0	0	0	0	0	0	0	0	0
1700011F14Rik	0	0	0	0	0	0	0	0	0	0	0	0	0	0	0	0	0	0	0
1700011H14Rik	0	0	0	0	0	0	0	0	0	0	0	0	0	0	0	0	0	0	0
1700011I03Rik	0	0	0	0	0	0	0	0	0	0	0	0	0	0	0	0	0	0	0
1700011J10Rik	2.54237	1.51261	3.7037	5.47945	3.82166	15.3207	9.21986	2.24719	14.2292	11.7188	16.6667	6.25	0.530504	7.97546	0	9.09091	3.33333	3.33333	6.06061
1700011L22Rik	0	0	0	0	0	0	0	0	0	0	0	0	0	0	0	0	0	0	0
1700011M02Rik	0	0	0	0	0	0	0	0	0	0	0	0	0	0	0	0	0	0	0
1700012A03Rik	0	0	0	0	0	0	0	0	0	0	0	0	0	0	0	0	0	0	0
1700012A16Rik	0	0	0	0	0.212314	0	0	0	0	0.520833	0	0	0	0.613497	0	0	0	0	0
1700012B07Rik	0	0	0	0	0	0	0	0	0	0	0	0	0	0	0	0	0	0	0
1700012B09Rik	0	0	0	0	0	0	0	0	0	0	0	0	0	0	0	0	0	0	0
1700012B15Rik	8.47458	3.02521	6.17284	9.24658	6.36943	7.83848	21.2766	4.49438	8.69565	8.59375	0	9.09091	2.12202	11.6564	2.77778	7.27273	10	16.6667	6.06061
1700012D01Rik	0	0.168067	0.617284	0.342466	0.849257	0.831354	1.41844	1.1236	0.790514	1.30208	8.33333	0.852273	0.265252	2.45399	0	3.63636	3.33333	0	0
1700012D14Rik	0.847458	0	0	0	0.424628	0.23753	0	0	0.395257	0.260417	0	0.568182	0	0	0	0	0	0	0
1700012I11Rik	0	0	0	0	0	0	0	0	0	0	0	0	0	0	0	0	0	0	0
1700012L04Rik	0	0	0	0	0	0.118765	0.70922	0	0	0	0	0	0	0	0	0	0	0	0
1700012P22Rik	0	0	0	0	0	0	0	0	0	0	0	0	0	0	0	0	0	0	0
1700013D24Rik	0	0	0	0	0	0	0	0	0	0	0	0	0	1.22699	0	0	0	0	0
1700013F07Rik	0	0	0	0	0	0.118765	0	0	0	0	0	0	0	0	0	0	0	0	0
1700013G23Rik	0	0.168067	0.617284	0	0	0.118765	0.70922	0	0.395257	0.520833	0	0	0.265252	0	0	0	0	0	0
1700013G24Rik	0	0	0	0	0	0	0	0	0	0	0	0	0	0	0	0	0	0	0
1700013H16Rik	0	0	0	0	0	0	0.70922	0	0	0	4.16667	0	0	0	0	0	0	0	0
1700013N18Rik	0	0	0	0	0	0	0	0	0	0	0	0	0	0	0	0	0	0	0
1700014N06Rik	0	0	0	0	0	0	0	0	0	0	0	0	0	0	0	0	0	0	0
1700015E13Rik	0	0	0	0	0	0	0	0	0	0	0	0	0	0	0	0	0	0	0
1700015F17Rik	0	0.336134	0	0	0	0	0	0	0	0.520833	0	0	0	0	0	0	0	0	0
1700015G11Rik	0	0	0	0	0	0	0	0	0	0	0	0	0	0	0	0	0	0	0
1700016C15Rik	0	0	0	0	0	0	0	0	0	0.260417	0	0	0	0	5.55556	0	0	0	0
1700016D06Rik	0	0	0	0	0	0	0	0	0	0	0	0	0	0	0	0	0	0	0
1700016G22Rik	0	0.168067	0	0	0	0	0	0	0	0	0	0.284091	0	0	0	0	0	0	0
1700016H13Rik	0	0	0	0	0	0	0	0	0	0	0	0	0	0	0	0	0	0	0
1700016K19Rik	0	0	0	1.36986	0	0	0	0	0	0.260417	0	0	0	0	0	0	0	0	0
1700016L04Rik	0	0	0	0	0	0	0	0	0	0	0	0	0	0	0	0	0	0	0
1700016L21Rik	0	0	0	0	0	0	0	0	0	0	0	0	0	0	0	0	0	0	0
1700016M24Rik	0	0	0	0	0	0	0	0	0	0	0	0	0	0	0	0	0	0	0
1700016P04Rik	0	0	0	0	0	0	0	0	0	0	0	0	0	0	0	0	0	0	0
1700017B05Rik	1.69492	1.68067	4.93827	3.08219	4.4586	7.48219	8.51064	2.80899	6.71937	4.42708	4.16667	4.54545	1.06101	17.7914	0	9.09091	6.66667	6.66667	9.09091
1700017D01Rik	0	0	0	0	0	0	0	0	0	0	0	0	0	0	0	0	0	0	0
1700017G19Rik	0	0	0	0	0	0	0	0	0	0.260417	0	0	0	0	0	0	0	0	0
1700017J07Rik	0	0	0	0	0	0	0	0	0	0	0	0	0	0	0	0	0	0	0
1700017N19Rik	0	0	0	0	0	0	0	0	0	0	0	0	0	0	0	0	0	0	0
1700018A04Rik	0	0	0	0	0	0	0	0	0	0	0	0	0	0	0	0	0	0	0
1700018B08Rik	0	0	0	0	0	0	0	0	0	0	0	0	0	0	0	0	0	0	0
1700018B24Rik	0	0	0	0	0	0	0	0	0	0	0	0	0	0	0	0	0	0	0
1700018C11Rik	0	0	0	0	0	0	0	0	0	0	0	0	0	0	0	0	0	0	0
1700018F24Rik	0	0	0	0	0	0	0	0	0	0	0	0	0	0	0	0	0	0	0
1700018G05Rik	0	0	0	0	0	0	0	0	0	0	0	0	0	0	0	0	0	0	0
1700018L02Rik	0	0	0	0	0.424628	0.23753	0	1.1236	0	0	0	0.284091	0	0.613497	0	0	0	0	0
1700018L24Rik	0	0	0	0	0	0	0	0	0	0	0	0	0	0	0	0	0	0	0
1700019A02Rik	0	0	0	0	0	0.118765	0	0	0	0	0	0	0	0	0	0	0	0	0
1700019B03Rik	0	0	0	0	0	0	0	0	0	0.260417	0	0	0	0	0	0	0	0	0
1700019B21Rik	0	0	0	0	0	0	0	0	0	0	0	0	0	0	0	0	0	0	0
1700019D03Rik	0	0	0	0.342466	0.212314	6.88836	0.70922	0	36.7589	0.520833	0	0.284091	0	0	0	1.81818	0	0	0
1700019E08Rik	0	0	0	0	0	0	0	0	0	0	0	0	0	0	0	0	0	0	0
1700019E19Rik	4.23729	3.02521	46.2963	1.36986	1.91083	21.0214	7.80142	11.7978	25.6917	28.9062	16.6667	17.3295	2.91777	5.52147	0	43.6364	10	3.33333	24.2424
1700019G17Rik	0.847458	0	0	0	0	0.23753	0	0	0	0	0	0	0	0	0	0	0	0	0
1700019G24Rik	0	0	0	0	0	0	0	0	0.395257	0	0	0	0	0	0	0	0	0	0
1700019L03Rik	0	0	0	0	0	0.118765	0	0.561798	0	0.260417	0	0.284091	0	0	0	0	0	0	0
1700019M22Rik	0	0	0	0	0	0	0	0	0	0	0	0	0	0	0	0	0	0	0
1700019N12Rik	0	0.168067	0	0	0.212314	0	0	0	0	0	0	0	0	0	0	0	0	0	0
1700019N19Rik	0	0	0	0	0	0	0	0	0	0	0	0	0	0	0	0	0	0	0
1700019O17Rik	0	0	0	0	0	0	0	0	0	0	0	0	0	0	0	0	0	0	0
1700020A23Rik	0	0	0	0	0	0	0	0	0	0	0	0	0	0	0	0	0	0	0
1700020D05Rik	0	0	0	0	0	0	0	0.561798	0	0.260417	0	0	0	0	0	0	0	0	0
1700020G17Rik	0	0	0	0	0	0	0	0	0	0	0	0	0	0	0	0	0	0	0
1700020I14Rik	17.7966	9.41176	9.25926	13.3562	10.828	12.7078	24.1135	13.4831	13.4387	10.4167	4.16667	11.3636	5.83554	8.58896	13.8889	10.9091	0	20	12.1212
1700020L24Rik	0	0	0	0	0	0	1.41844	0	0	0	0	0.284091	0	0	0	0	0	0	0
1700020M21Rik	0	0.168067	0	0	0	0	0	0	0	0	0	0	0	0	0	0	0	0	0
1700020N01Rik	0	0	0	0	0	0.118765	0	0	0	0	0	0	0	0	0	0	0	0	0
1700020N15Rik	0	0	0	0	0	0	0	0	0	0	0	0	0	0	0	0	0	0	0
1700020N18Rik	0	0	0	0	0.212314	0	0	0	0	0	0	0	0	0	0	0	0	0	0
1700020O03Rik	1.69492	0.672269	1.23457	2.05479	1.69851	2.25653	3.5461	2.80899	1.97628	2.08333	4.16667	1.98864	0.265252	0.613497	0	1.81818	6.66667	6.66667	3.0303
1700021C14Rik	0	0.504202	1.23457	1.36986	1.91083	1.66271	2.83688	0	0.790514	1.82292	0	2.27273	0.530504	1.22699	0	1.81818	3.33333	0	3.0303
1700021F05Rik	2.54237	3.69748	8.64198	2.05479	1.06157	10.6888	9.92908	4.49438	9.88142	10.1562	8.33333	12.5	1.59151	7.97546	27.7778	5.45455	10	3.33333	3.0303
1700021F07Rik	0	0	0	0	0	0	0	0	0	0	0	0	0	0	0	0	0	0	0
1700021K19Rik	4.23729	3.19328	3.7037	0.342466	5.52017	3.32542	2.12766	2.24719	2.7668	1.82292	0	1.13636	1.59151	5.52147	0	3.63636	3.33333	0	3.0303
1700021N21Rik	0	0	0	0	0	0	0	0	0	0	0	0	0	0	0	1.81818	0	0	0
1700022A21Rik	0	0	0	0	0	0	0	0	0	0	0	0	0	0	0	0	0	0	0
1700022A22Rik	0	0	0	0	0	0	0	0	0	0	0	0	0	0	0	0	0	0	0
1700022E09Rik	0	0	0	0	0	0	0	0	0	0	0	0	0	0	0	0	0	0	0
1700022H16Rik	0	0	0	0	0	0	0	0	0	0	0	0	0	0	0	0	0	0	0
1700022I11Rik	0	0	0	0	0	0.118765	0	0	0	0	0	0	0	0	0	0	0	0	0
1700022P22Rik	0	0	0	0	0	0	0	0	0	0	0	0	0	0	0	0	0	0	0
1700023A16Rik	0	0	0	0	0	0	0	0	0	0	0	0	0	0	0	0	0	0	0
1700023C21Rik	0	0	0	0	0	0	0	0	0	0	0	0	0	0	0	0	0	0	0
1700023E05Rik	0	0	0	0	0	0	0	0	0	0	0	0	0	0	0	0	0	0	0
1700023F02Rik	0	0	0	0	0	0	0	0	0	0	0	0	0	0	0	0	0	0	0
1700023F06Rik	0.847458	0	0	0	0.424628	4.27553	0	0	1.18577	2.60417	0	0	0	0.613497	0	0	0	0	3.0303
1700023L04Rik	0	0	0.617284	0	0.212314	0.593824	1.41844	0	0.395257	0	0	0	0	1.22699	0	0	0	3.33333	0
1700024B18Rik	0	0	0	0	0	0.23753	0	0	0	1.82292	0	0	0	0.613497	0	0	0	0	0
1700024F13Rik	0	0	0	0	0	0	0	0	0	0	0	0	0	0	0	0	0	0	0
1700024G13Rik	0	0	0	0	0	0	0	0	0	0	0	0	0	0	0	0	0	0	0
1700024P03Rik	0	0	0	0	0	0	0	0	0	0	0	0	0	0	0	0	0	0	0
1700024P04Rik	0	0	0	0	0	0	0	0	0	0	0	0	0	0	0	0	0	0	0
1700024P16Rik	0	0	0	0	0	0	0	0	0	0.520833	0	0	0	0	0	0	0	0	0
1700025B11Rik	0.847458	0.336134	0	0	0	0	0	1.1236	0	0	0	0	0.530504	0	0	0	0	0	0
1700025C18Rik	0	0	0	0	0	0	0	0	0	0	0	0	0	0	0	0	0	0	0
1700025E21Rik	0	0	0	0	0	0	0	0	0	0	0	0	0	0	0	0	0	0	0
1700025F22Rik	0	0	0	0	0	0	0	0	0	0	0	0	0	0	0	0	0	0	0
1700025F24Rik	0	0	0	0	0	0	0	0	0	0	0	0	0	0	0	0	0	0	0
1700025G04Rik	26.2712	12.9412	20.3704	6.16438	1.06157	31.1164	31.2057	10.6742	27.2727	20.5729	20.8333	8.52273	9.28382	11.0429	5.55556	43.6364	6.66667	10	21.2121
1700025K23Rik	3.38983	0.504202	1.23457	0	0	4.63183	1.41844	0	3.95257	2.60417	4.16667	1.98864	0	1.84049	5.55556	1.81818	3.33333	0	6.06061
1700025K24Rik	0	0	0	0	0	0	0	0	0	0	0	0	0	0	0	0	0	0	0
1700025M24Rik	0	0	0	0	0	0	0	0	0	0	0	0	0	0	0	0	0	0	0
1700025N23Rik	0	0	0	0	0	0.23753	0	0.561798	0	0	0	0	0	0	0	0	0	0	0
1700026D08Rik	0	0	0	0	0	0	0	0	0	0	0	0	0	0	0	0	0	0	0
1700026D11Rik	0	0	0	0	0	0	0	0	0	0	0	0	0	0	0	0	0	0	0
1700026F02Rik	0	0	0	0	0	0	0	0	0	0	0	0	0	0	0	0	0	0	0
1700026J04Rik	0	0	0	0	0	0.356295	0	0	0	0	0	0	0.265252	0	0	12.7273	0	0	0
1700026L06Rik	0	0	0	0.684932	0	0	1.41844	0	0	0.520833	0	0	0	3.06748	0	0	0	0	3.0303
1700027A15Rik	0	0	0	0	0	0	0	0	0	0	0	0	0	0	0	0	0	0	0
1700027A23Rik	0	0	0	1.0274	0.424628	0	0.70922	0	0	0	0	0	0	0	0	0	0	0	0
1700027D21Rik	0	0	0	0	0	0	0	0	0	0	0	0	0	0	0	0	0	0	0
1700027F09Rik	0	0	0	0	0	0	0	0	0	0	0	0	0	0	0	0	0	0	0
1700027H10Rik	0	0	0	0	0	0	0	0	0	0	0	0	0	0	0	0	0	0	0
1700027I24Rik	0	0	0	0	0	0	0	0	0	0	0	0	0	0	0	0	0	0	0
1700027J07Rik	0	0	0	0	0	0	0	0	0	0	0	0	0	0	0	0	0	0	0
1700028B04Rik	0	0	0	0	0	0	0	0	0	0	0	0	0	0	0	0	0	0	0
1700028D13Rik	0	0	0	0	0	0	0	0	0	0.260417	0	0	0	0	0	0	0	0	0
1700028E10Rik	0	0	0	0.342466	0.212314	0.118765	1.41844	0.561798	0	0	0	0	0.265252	0.613497	0	0	0	0	0
1700028I16Rik	0	0	0	0	0	0	0	0	0	0	0	0	0	0	0	0	0	0	0
1700028J19Rik	0.847458	0.168067	0	0	0.424628	0.475059	0	0	0.395257	0.520833	0	0.852273	0.265252	0.613497	0	0	0	0	0
1700028K03Rik	0	0	0	0	0	0	0	0	0	0	0	0	0	0	0	0	0	0	0
1700028M03Rik	0	0	0	0	0	0	0	0	0	0	0	0	0	0	0	0	0	0	0
1700028P14Rik	0	0	0	0	0	0	0	0	0	0	0	0	0	0	0	0	0	0	0
1700028P15Rik	0	0	0	0	0	0	0	0	0	0	0	0	0	0	0	0	0	0	0
1700029B22Rik	0	0	0	0	0	0	0	0	0	0	0	0	0	0	0	0	0	0	0
1700029F09Rik	7.62712	7.89916	11.7284	15.411	15.0743	10.095	18.4397	11.236	20.1581	11.9792	8.33333	15.0568	10.6101	9.20245	5.55556	18.1818	13.3333	6.66667	6.06061
1700029F12Rik	0	0	0	0	0	0	0	0	0	0	0	0	0	0	0	0	0	0	0
1700029G01Rik	2.54237	7.56303	6.79012	0	0.424628	2.019	0	6.17978	0.790514	5.98958	12.5	2.55682	4.24403	1.84049	0	3.63636	3.33333	0	9.09091
1700029H14Rik	0	0	0	0	0	0	0	0	0	0	0	0	0	0	0	0	0	0	0
1700029I01Rik	0	0.504202	0	0.684932	0.636943	1.18765	2.83688	0.561798	1.97628	1.5625	0	0.568182	0.265252	3.06748	0	0	0	3.33333	0
1700029I15Rik	0	0.168067	0.617284	0	0	0.118765	0	0	0	0.260417	0	0.568182	0.265252	0.613497	0	0	3.33333	0	0
1700029J03Rik	0	0	0	0	0	0	0	0	0	0.260417	0	0	0	0	0	0	0	0	0
1700029J07Rik	0	0.336134	0	0	0.636943	0.831354	0	0.561798	2.37154	1.30208	12.5	1.42045	0	0	0	0	0	0	0
1700029J11Rik	0	0	0	0	0	0	0.70922	0	0	0	0	0	0	0	0	0	0	0	0
1700029M20Rik	0	0	0	0	0	0	0	0	0	0	0	0	0	0	0	0	0	0	0
1700029N11Rik	0	0	0	0	0	0	0	0	0	0	0	0	0	0	0	0	0	0	0
1700029P11Rik	0	0	0	0	0	0	0	0	0	0	0	0	0	0	0	0	0	0	0
1700030A11Rik	0	0	0	0	0	0	0	0	0	0	0	0	0	0	0	0	0	0	0
1700030C10Rik	0.847458	1.51261	0.617284	0.342466	0.212314	0.831354	1.41844	1.68539	0.790514	0.520833	0	0	1.06101	0	0	0	0	0	0
1700030F04Rik	0	0	0	0	0	0	0	0	0	0	0	0	0	0	0	0	0	0	0
1700030F18Rik	0	0	0	0	0	0	0	0	0	0	0	0	0	0	0	0	0	0	0
1700030J22Rik	0.847458	0	0	0	0	0.118765	0	0	0	0.260417	0	0	0.265252	0	0	0	0	0	0
1700030K09Rik	0.847458	0.672269	0.617284	0.684932	2.12314	1.42518	3.5461	0.561798	1.97628	1.04167	4.16667	1.13636	0	1.84049	2.77778	1.81818	0	0	3.0303
1700030L20Rik	0	0	0	0	0	0	0	0	0	0	0	0	0	0	0	0	0	0	0
1700030M09Rik	0	0	0	0	0	0	0	0	0	0	0	0	0	0	0	0	0	0	0
1700030N03Rik	0	0	0	0	0	0	0	0	0	0	0	0	0	0	0	0	0	0	0
1700030O20Rik	0	0	0	0	0	0	0	0	0	0	0	0	0	0	0	0	0	0	0
1700031A10Rik	0.847458	0	0	0	0	0	0	0	0	0	0	0	0	0	0	0	0	0	0
1700031F05Rik	0	0	0	0	0	0	0	0	0	0	0	0	0	0	0	0	0	0	0
1700031M16Rik	0	0	0	0	0	0	0	0	0	0	0	0	0	0	0	0	0	0	0
1700031P21Rik	0	0	0	0	0	0	0	0	0	0	0	0	0	0	0	0	0	0	0
1700034E13Rik	0	0	0	0	0	0.118765	0	0	0	0	0	0	0	0	0	0	0	0	0
1700034F02Rik	0	0.168067	0.617284	0.342466	0	0.118765	0	0	0	0.260417	4.16667	0	0	0	0	0	0	0	0
1700034G24Rik	0	0	0	0	0	0	0	0	0	0	0	0	0	0	0	0	0	0	0
1700034H14Rik	5.08475	4.70588	7.40741	7.53425	3.39703	12.114	10.6383	5.05618	13.4387	12.2396	8.33333	7.10227	2.91777	9.20245	13.8889	9.09091	6.66667	16.6667	9.09091
1700034H15Rik	0	0	0	0	0	0	2.12766	0	0	0.260417	0	0	0	0	2.77778	0	0	0	0
1700034I23Rik	0	0	0	0	0	0	0	0	0	0	0	0	0	0	0	0	0	0	0
1700034J05Rik	0	0	0	0	0	0.118765	0	0	0	0	0	0	0	0	0	0	0	0	0
1700034K08Rik	0	0	0	0	0	0	0	0	0	0	0	0	0	0	0	0	0	0	0
1700034O15Rik	0	0	0	0	0	0	0	0	0	0	0	0	0	0	0	0	0	0	0
1700034P13Rik	0	0	0	0	0	0	0.70922	0	0	0	0	0	0	0	0	0	0	0	0
1700036G14Rik	0	0	0	0	0	0	0	0	0	0	0	0	0	0	0	0	0	0	0
1700037C18Rik	1.69492	0.336134	0	0.684932	1.06157	0.831354	0	0.561798	1.58103	1.30208	0	0.284091	0	1.22699	2.77778	5.45455	3.33333	0	3.0303
1700037H04Rik	2.54237	2.01681	7.40741	3.08219	2.54777	4.15677	9.21986	3.37079	9.09091	3.64583	8.33333	2.55682	1.32626	6.13497	0	1.81818	0	16.6667	9.09091
1700039E15Rik	0	0	0	0	0	0	0	0	0	0	0	0	0	0	0	0	0	0	0
1700039E22Rik	0	0	0	0	0	0	0	0	0	0	0	0	0	0	0	0	0	0	0
1700040I03Rik	1.69492	2.18487	1.85185	2.73973	4.67091	7.83848	8.51064	5.61798	5.5336	9.375	4.16667	2.55682	0.530504	1.84049	0	3.63636	6.66667	0	18.1818
1700040L02Rik	0	0	0	0	0	0	0	0	0	0	0	0	0	0	0	0	0	0	0
1700040N02Rik	0	0	0	0	0	0	0	0	0	0	0	0	0	0	0	0	0	0	0
1700041C23Rik	0	0	0	0	0	0	0	0	0	0	0	0	0	0	0	0	0	0	0
1700041M19Rik	0	0	0	0	0	0	0	0	0	0	0	0	0	0	0	0	0	0	0
1700042B14Rik	0	0	0	0	0	0	0	0	0	0	0	0	0	0	0	0	0	0	0
1700042G07Rik	0	0	0	0	0	0	0	0	0	0	0	0	0	0	0	0	0	0	0
1700042G15Rik	0	0	0	0	0	0	0	0	0	0	0	0	0	0	0	0	0	0	0
1700042O10Rik	0	0	0	0.342466	0	0.118765	0	0	0	0.260417	0	0	0	0	0	0	0	0	0
1700044C05Rik	0	0	0	0	0	0	0	0	0	0	0	0	0	0	0	0	0	0	0
1700044K03Rik	0	0	0	0	0	0	0	0	0	0	0	0	0	0	0	0	0	0	0
1700045H11Rik	0	0	0	0	0	0.118765	0	0	0	1.04167	0	0	0	0	0	0	0	0	0
1700045I19Rik	0	0	1.23457	0	0	0.118765	0	0	0	0	0	0.284091	0	0	0	0	0	0	0
1700046C09Rik	0	0	0	0	0	0	0	0	0	0	0	0	0	0	0	0	0	0	0
1700047G03Rik	0	0	0	0	0	0	0	0	0	0	0	0	0	0	0	0	0	0	0
1700047I17Rik2	0	0	0	0	0	0	0	0	0	0	0	0	0	0	0	0	0	0	0
1700047L14Rik	0	0	0	0	0	0	0	0	0	0	0	0	0	0	0	0	0	0	0
1700047M11Rik	0	0	0	0	0	0	0.70922	0	0.395257	0	0	0	0	0	0	0	26.6667	0	3.0303
1700048M11Rik	0	0	0	0	0	0	0	0	0	0	0	0	0	0	0	0	0	0	0
1700048O20Rik	0.847458	0	0.617284	0	0.212314	0.712589	0.70922	0	2.7668	0.520833	0	0.568182	0	0	0	0	0	0	0
1700049E15Rik	0	0	0	0	0	0	0	0	0	0	0	0	0	0	0	0	0	0	0
1700049E22Rik	0	0	0.617284	0	0	0	0	0	0	0	0	0	0	0	0	0	0	0	0
1700049G17Rik	0	0.336134	0.617284	0.684932	0.212314	0.475059	0	0	0.790514	0.520833	4.16667	0.284091	0	0	0	0	0	0	0
1700049L16Rik	0	0	0	0	0	0	0	0	0	0	0	0	0	0	0	0	0	0	0
1700051A21Rik	0	0	0	0	0	0	0	0	0	0	0	0	0	0	0	0	0	0	0
1700052I22Rik	0	0	0	0	0	0	0	0	0	0	0	0	0	0	0	0	0	0	0
1700052K11Rik	0	1.0084	0.617284	1.36986	1.27389	0.593824	1.41844	1.68539	0.790514	0.520833	4.16667	1.70455	0.795756	0.613497	5.55556	0	0	0	0
1700052N19Rik	0	0.840336	1.23457	3.42466	3.18471	1.30641	6.38298	1.1236	3.16206	2.08333	8.33333	2.27273	0.530504	1.84049	5.55556	3.63636	6.66667	0	3.0303
1700054A03Rik	0	0	0	0	0	0	0	0	0	0	4.16667	0	0	0	0	0	0	0	0
1700054K19Rik	0	0	0	0	0	0	0	0	0	0	0	0	0	0	0	0	0	0	0
1700054M17Rik	0	0	0	0	0	0	0	0	0	0	0	0	0	0	0	0	0	0	0
1700054N08Rik	0.847458	0.168067	0.617284	3.08219	1.27389	0.950119	3.5461	1.1236	0.395257	1.5625	0	1.42045	0.795756	0	0	1.81818	10	0	0
1700054O13Rik	0	0	0	0	0	0	0	0	0	0	0	0	0	0	0	0	0	0	0
1700055C04Rik	0	0	0	0	0	0	0	0	0	0	0	0	0	0	0	0	0	0	0
1700055N04Rik	0	0	0	0	0	0	0	0	0	0	0	0	0	0	0	0	0	0	0
1700056E22Rik	0	0	0	1.71233	0	0.712589	2.83688	0	0.395257	0	0	0.568182	0	0.613497	0	1.81818	0	3.33333	0
1700057G04Rik	0	0	0	0	0	0	0	0	0	0	0	0	0	0	0	0	0	0	0
1700057H15Rik	0	0	0	0	0	0	0	0	0	0	0	0	0	0	0	0	0	0	0
1700057K13Rik	0	0	0	0	0	0	0	0	0	0.260417	0	0	0	0	0	0	0	0	0
1700058G18Rik	0	0	0	0	0	0	0	0	0	0	0	0	0	0	0	0	0	0	0
1700060C16Rik	0	0	0	0	0	0	0	0	0	0	0	0	0	0	0	0	0	0	0
1700060C20Rik	0	0	0	0	0	0	0	0	0	0	0	0	0	0	0	0	0	0	0
1700061F12Rik	0	0	0	0	0	0	0	0	0	0	0	0	0	0	0	0	0	0	0
1700061G19Rik	0	0	0	1.71233	0	0.118765	1.41844	0	0	0	0	0.284091	0	0.613497	0	0	0	0	0
1700061I17Rik	0	0.336134	0	0	0	0	0	0	0	0	0	0	0	0	0	0	0	0	0
1700061J05Rik	0	0	0	0	0	0	0	0	0	0	0	0	0	0	0	0	0	0	0
1700063A18Rik	0	0	0	0	0	0	0	0	0	0	0	0	0	0	0	0	0	0	0
1700063D05Rik	0	0	0	0	0	0	0	0	0	0	0	0	0	0	0	0	0	0	0
1700063O14Rik	0	0	0	0	0	0	0	0	0	0	0	0	0	0	0	0	0	0	0
1700064J06Rik	0	0	0	0	0	0	0	0	0	0	0	0	0	0	0	0	0	0	0
1700064M15Rik	0	0	0	0	0	0.118765	0	0	0	0	0	0	0	0	0	0	0	0	0
1700065D16Rik	0	0.168067	0	0	0	0	0	0	0	0	0	0	0	0	0	0	0	0	0
1700065I16Rik	0	0	0	0	0	0	0	0	0	0	0	0	0	0	0	0	0	0	0
1700065I17Rik	0	0	0	0	0	0	0	0	0	0	0	0	0	0	0	1.81818	0	0	0
1700065J11Rik	0	0	0	0	0	0	0	0	0	0.520833	0	0	0	0	0	0	0	0	0
1700065J18Rik	0	0	0	0	0	0	0	0	0	0	0	0	0	0	0	0	0	0	0
1700065O20Rik	0	0	0	0	0	0	0	0	0	0	0	0	0	0	0	0	0	0	0
1700066B17Rik	0	0	0	0	0	0	0	0	0	0	0	0	0	0	0	0	0	0	0
1700066B19Rik	6.77966	0.504202	0	0.684932	1.4862	0.118765	1.41844	5.61798	1.18577	2.08333	0	0.568182	1.06101	1.22699	0	3.63636	0	0	0
1700066J24Rik	0	0	0	0	0	0	0	0	0	0	0	0	0	0	0	0	0	0	0
1700066M21Rik	0	0.672269	0	1.36986	0.636943	0.712589	2.12766	0	2.7668	0.78125	0	0	0	1.22699	2.77778	0	0	3.33333	0
1700066N21Rik	0	0	0	0	0	0	0	0	0	0	0	0	0	0	0	0	0	0	0
1700066O22Rik	0	0	0	0	0	0	0	0	0	0	0	0	0	0	0	0	0	0	0
1700067G17Rik	0	0	0	0	0	0	0	0	0	0	0	0	0	0	0	0	0	0	0
1700067K01Rik	0	0.168067	0	0	0.212314	0.23753	0	0	0	0	0	0	0	0	0	0	0	0	0
1700067P10Rik	0	0	0	0	0	0	0	0	0	0	0	0	0	0	0	0	0	0	0
1700069L16Rik	0	0	0	0	0	0	0	0	0	0	0	0	0	0	0	0	0	0	0
1700069P05Rik	0	0	0	0	0	0	0	0	0	0	0	0	0	0	0	0	0	0	0
1700071K01Rik	0	0	0	0	0	0	0	0	0	0	0	0	0	0	0	0	0	0	0
1700071M16Rik	0	0	0	0	0	0	0	0	0	0	0	0	0	0	0	0	0	0	0
1700072B07Rik	0	0	0	0	0	0	0	0	0	0	0	0	0	0	0	0	0	0	0
1700072O05Rik	0	0	0	0	0	0	0	0	0	0	0	0	0	0	0	0	0	0	0
1700073E17Rik	0	0	0	0.342466	0	0.118765	0	0	0	0.260417	0	0.568182	0	0	0	0	0	0	0
1700074H08Rik	0	0	0	0	0	0	0	0	0	0	0	0	0	0	0	0	0	0	0
1700074P13Rik	0	0	0	0	0	0	0	0	0	0	0	0	0	0	0	0	0	0	0
1700080E11Rik	0	0	0	0	0	0	0	0	0	0	0	0	0	0	0	0	0	0	0
1700080N15Rik	0	0	0	0	0	0	0	0	0	0	0	0	0	0	0	0	0	0	0
1700080O16Rik	0	0	0	0	0	0	0	0	0	0	0	0	0	0	0	0	0	0	0
1700081H04Rik	0	0	0	0	0	0	0	0	0	0	0	0	0	0	0	0	0	0	0
1700081H22Rik	0	0	0	0	0	0	0	0	0	0	0	0	0	0	0	0	0	0	0
1700081L11Rik	12.7119	7.73109	11.1111	18.1507	19.5329	12.7078	29.7872	10.1124	16.996	17.1875	12.5	12.5	6.1008	20.8589	0	12.7273	13.3333	20	15.1515
1700084C01Rik	0	0	1.23457	0	0	0	0	0	0	0	0	0	0	0	0	0	0	0	0
1700084E18Rik	1.69492	2.35294	0.617284	1.0274	0.849257	0.23753	0.70922	0	0.395257	0.78125	0	0.568182	2.38727	0	0	1.81818	0	0	3.0303
1700084F23Rik	0	0	0	0	0	0	0	0	0	0	0	0	0	0	0	0	0	0	0
1700084J12Rik	0	0	0	0	0	0	0	0	0	0.260417	0	0	0	0	0	0	0	0	0
1700085B03Rik	0	0	0	0	0	0	0	0	0	0	0	0	0	0	0	0	0	0	0
1700085C21Rik	0	0	0	0	0	0	0	0	0	0	0	0	0	0	0	0	0	0	0
1700086L19Rik	0	0	0.617284	0	0	0	0	0	0	0.520833	0	1.42045	0.265252	0	0	0	0	0	0
1700086O06Rik	1.69492	1.17647	2.46914	0	0	0.950119	0.70922	0	0.790514	1.5625	0	1.13636	1.32626	1.22699	0	0	0	0	3.0303
1700088E04Rik	0	0.168067	0.617284	0	0	0.831354	0	0.561798	3.55731	1.04167	0	0.568182	0	0	0	0	0	0	3.0303
1700090G07Rik	0	0	0	0	0	0	0	0	0	0	0	0	0	0	0	0	0	0	0
1700091E21Rik	0	0	0	0	0	0	0	0	0	0	0	0	0	0	0	0	0	0	0
1700092C02Rik	0	0	0	0	0	0	0	0	0	0	0	0	0	0	0	0	0	0	0
1700092C10Rik	0	0	0	0	0	0	0	0	0	0	0	0	0	0	0	0	0	0	0
1700092E19Rik	0	0	0	0	0	0	0	0	0	0	0	0	0	0	0	0	0	0	0
1700092K14Rik	0	0	0	0	0	0	0	0	0	0	0	0	0	0	0	0	0	0	0
1700092M07Rik	0	0	0	0.342466	0	0.118765	0	0	0	0	0	0.852273	0	0	0	0	0	0	0
1700093K21Rik	0	0.168067	0	0	0	0.356295	0	0.561798	0	1.04167	4.16667	0.568182	0	0.613497	0	1.81818	0	0	0
1700094D03Rik	2.54237	2.18487	3.08642	1.36986	0.849257	3.56295	7.0922	1.1236	3.55731	5.20833	0	1.13636	1.06101	3.68098	5.55556	3.63636	3.33333	0	15.1515
1700094J05Rik	0	0	0	0	0	0	0	0	0	0	0	0	0	0	0	0	0	0	0
1700094M24Rik	0	0	0	0	0	0	0	0	0	0	0	0	0	0	0	0	0	0	0
1700095A21Rik	0	0	0	0	0	0	0	0	0	0	0	0	0	0	0	0	0	0	0
1700095B10Rik	0	0	0	0	0	0	0	0	0	0	0	0	0	0	0	0	0	0	0
1700095B22Rik	0	0	0	0	0	0	0	0	0	0	0	0	0	0	0	0	0	0	0
1700096J18Rik	0	0	0	0	0	0	0	0	0	0	0	0	0	0	0	0	0	0	0
1700096K18Rik	0.847458	1.0084	2.46914	1.71233	2.33546	3.44418	2.12766	2.24719	5.5336	1.04167	4.16667	0.284091	2.38727	1.22699	0	1.81818	0	3.33333	0
1700097N02Rik	0	0.168067	0	5.82192	0	0.118765	2.83688	0	0	0	0	0	0	0	0	1.81818	0	6.66667	0
1700100L14Rik	0	0	0	0	0	0	0	0	0	0	0	0	0	0	0	0	0	0	0
1700101E01Rik	0	0	0	0	0	0	0	0	0	0	0	0	0	0	0	0	0	0	0
1700101I11Rik	2.54237	0	0	0	0.212314	0.23753	0	0	0	0	0	0.568182	0	0	0	0	0	0	3.0303
1700101O22Rik	0	0	0	0	0	0	0	0	0	0	0	0	0	0	0	0	0	0	0
1700102H20Rik	0.847458	0.336134	0	0	0	0.118765	0	0	0.395257	0.260417	0	0.568182	0	0	0	0	0	0	0
1700102P08Rik	1.69492	0	0	0	0	0.593824	0.70922	0.561798	1.58103	0.520833	0	0	0.265252	0	0	0	0	0	0
1700104A03Rik	0	0	0	0	0	0	0	0	0	0	0	0	0	0	0	0	0	0	0
1700105P06Rik	0	0	0	0	0	0.23753	0	0	0.395257	0.260417	0	0.284091	0	0	0	0	0	0	0
1700106J16Rik	0	0	0	0	0	0	0	0	0	0	0	0	0	0	0	0	0	0	0
1700106N22Rik	0	1.0084	3.08642	0.684932	0.849257	3.91924	3.5461	0.561798	4.34783	3.125	4.16667	1.98864	0.265252	6.13497	0	5.45455	6.66667	0	6.06061
1700108F19Rik	0	0	1.23457	0	0	0.475059	0	0	0.395257	0.260417	0	0	0	0	0	0	0	0	0
1700108J01Rik	0	0	0	0	0	0	0	0	0	0	0	0	0	0	0	0	0	0	0
1700108M19Rik	0	0	0	0	0	0	0	0.561798	0	0	0	0	0	0	0	0	0	0	0
1700109F18Rik	2.54237	0.504202	0	0	0.212314	0.118765	0	1.68539	0	1.04167	0	0.284091	0.265252	0	0	3.63636	0	0	0
1700109G14Rik	0	0	0	0	0	0	0	0	0	0	0	0	0	0	0	0	0	0	0
1700109G15Rik	0	0	0	0	0	0	0	0	0	0	0	0	0	0	0	0	0	0	0
1700109H08Rik	0	0	0	0.342466	0.212314	0.593824	0.70922	0	0	0	0	0	0	0	0	0	0	0	0
1700109I08Rik	0	0	0	0	0	0	0	0	0	0	0	0	0	0	0	0	0	0	0
1700110C19Rik	0	0	0	0	0	0	0	0	0	0	0	0	0	0	0	0	0	0	0
1700110I01Rik	0	0.504202	0	0	0	0	0	0	0	0	0	0	0.265252	0	0	0	0	0	0
1700110K17Rik	0	0	0	0	0	0	0	0	0	0	0	0	0	0	0	0	0	0	0
1700110M21Rik	0	0	0	0	0	0	0	0	0	0	0	0	0	0	0	0	0	0	0
1700111N16Rik	0	0	0	0	0	0	0	0	0	0	0	0	0	0	0	0	0	0	0
1700112E06Rik	3.38983	0.840336	1.23457	0	0.212314	4.27553	1.41844	1.1236	3.95257	1.5625	0	0.568182	1.06101	0.613497	0	3.63636	0	0	6.06061
1700112H15Rik	0	0	0	0	0	0	0	0	0	0	0	0	0	0	0	0	0	0	0
1700113A16Rik	2.54237	0.168067	0	0.342466	0.424628	1.30641	1.41844	1.1236	0.395257	2.34375	0	0.284091	0	0.613497	0	0	6.66667	6.66667	3.0303
1700113H08Rik	0	0	0	0	0	0	0	0	0	0	0	0.284091	0	0	2.77778	0	0	0	0
1700113I22Rik	0.847458	0	3.08642	0	0.212314	1.18765	0.70922	0.561798	0.790514	1.5625	8.33333	1.70455	0	1.84049	38.8889	0	0	3.33333	0
1700119H24Rik	0	0.168067	0	0	0	0	0	0	0	0	0	0	0	0	0	0	0	0	0
1700120C14Rik	0	0	3.7037	0.684932	0	0.712589	0	0	0.790514	0.520833	0	0	0	0	13.8889	0	0	0	3.0303
1700120E14Rik	0	0	0	0	0	0	0	0	0	0	0	0	0	0	0	0	0	0	0
1700120G07Rik	0	0	0	0	0	0	0	0	0	0	0	0	0	0	0	0	0	0	0
1700120K04Rik	0	0	0	0	0	0	0	0	0	0	0	0	0	0	0	0	0	0	0
1700121L16Rik	0	0	0	0	0	0	0	0	0	0	0	0	0	0	0	0	0	0	0
1700121N20Rik	0	0	0	0	0	0	0	0	0	0	0	0	0	0	0	0	0	0	0
1700122O11Rik	0	0	0	0	0	0	0	0	0	0	0	0	0	0	0	0	0	0	0
1700123I01Rik	0	0	0	0	0	0.118765	0	0	0	0	0	0	0	0	0	0	0	0	0
1700123K08Rik	0	0	0	0	0	0	0	0	0	0	0	0	0	0	0	0	0	0	0
1700123L14Rik	0	0	0	0	0	0.118765	0	0	0	0	0	0	0	0	0	0	0	0	0
1700123M08Rik	0	0	0.617284	0.342466	0.212314	0.356295	0.70922	0.561798	0.395257	0.520833	0	0.852273	0	0.613497	2.77778	0	0	3.33333	0
1700123O12Rik	0	0	0	0	0	0	0	0	0	0	0	0	0	0	0	0	0	0	0
1700123O20Rik	21.1864	14.6218	12.963	11.6438	15.9236	16.5083	24.8227	17.9775	17.7866	16.9271	12.5	17.8977	15.6499	12.8834	11.1111	20	16.6667	26.6667	12.1212
1700123O21Rik	0	0	0	0	0	0	0	0	0	0	0	0	0	0	0	0	0	0	0
1700125D06Rik	0	0.168067	0	0	0	0	0	0	0	0.260417	0	0	0.530504	0	0	0	0	0	0
1700125G02Rik	0	0	0	0	0	0	0	0	0	0	0	0	0	0	0	0	0	0	0
1700125G22Rik	0	0	0	0	0	0	0	0	0	0	0	0	0	0	0	0	0	0	0
1700125H03Rik	0	0	0	0	0	0	0	0	0	0	0	0	0	0	0	0	0	0	0
1700125H20Rik	0	0	0	0	0	0	0	0	0	0.260417	0	0	0	0	0	0	0	0	0
1700126H18Rik	0	0	0	0	0	0	0	0	0	0	0	0	0	0	0	0	0	0	0
1700128A07Rik	0	0	0	0	0	1.18765	0	0	0	0.520833	0	0	0	0	0	0	0	0	3.0303
1700128F08Rik	0	0	0	0	0	0	0	0	0	0	0	0	0	0	0	0	0	0	0
1700129C05Rik	0	0	0	0	0	0	0	0	0	0	0	0	0	0	0	0	0	0	0
1810006J02Rik	0.847458	0	0	0	0	0	0	1.1236	0	0	0	0	0.265252	0	0	0	0	0	0
1810006K21Rik	32.2034	16.9748	40.7407	51.0274	45.2229	70.5463	77.305	25.8427	74.7036	79.6875	50	50.8523	10.3448	57.6687	47.2222	41.8182	36.6667	60	69.697
1810007C17Rik	0	0	0	0	0	0	0	0	0	0	0	0	0	0	0	0	0	0	0
1810007D17Rik	0	0	0	0	0	0	0	0	0.395257	0	0	0	0	0	0	0	0	0	0
1810007I06Rik	0	0	0	0	0	0	0	0	0	0	0	0	0	0	0	0	0	0	0
1810008A18Rik	5.08475	4.36975	11.1111	13.0137	8.06794	8.90736	12.0567	4.49438	11.4625	9.11458	8.33333	6.53409	1.32626	7.97546	0	7.27273	6.66667	6.66667	6.06061
1810008I18Rik	0	0.168067	0	0	0	0.356295	0	0	0.395257	0.260417	0	0.284091	0	0	0	3.63636	0	0	0
1810009A15Rik	22.8814	12.437	6.79012	17.4658	19.7452	11.5202	31.2057	15.1685	19.7628	21.0938	25	9.09091	6.6313	15.9509	13.8889	18.1818	20	23.3333	18.1818
1810009J06Rik	0	0	0	0	0	0	0	0	0	0	0	0	0	0	0	0	0	0	0
1810010D01Rik	0	0	0.617284	0	0	0	0	0	0	0.260417	0	0	0	0	0	0	0	0	0
1810010H24Rik	0	0.168067	0	0.342466	0	3.32542	0.70922	0	4.34783	2.86458	8.33333	0.284091	0	1.22699	0	1.81818	6.66667	0	0
1810011H11Rik	0	0	4.93827	0.342466	0.212314	0	0	0	0	0	0	0	0	1.84049	0	0	0	0	0
1810011O10Rik	48.3051	83.0252	25.9259	3.76712	4.4586	5.70071	12.766	37.0787	2.7668	13.0208	12.5	44.8864	67.6393	9.81595	2.77778	5.45455	20	10	12.1212
1810012K16Rik	0	0	0	0	0.212314	0	0	0	0	0	0	0	0	0.613497	0	0	0	0	0
1810012P15Rik	4.23729	1.34454	1.23457	3.08219	4.24628	1.06888	8.51064	1.68539	3.16206	1.04167	0	0	0.530504	3.06748	2.77778	3.63636	3.33333	6.66667	3.0303
1810013A23Rik	0	0	0	0	0	0	0	0	0	0	0	0	0	0	0	0	0	0	0
1810013D10Rik	2.54237	3.69748	4.32099	7.53425	7.431	4.98812	13.4752	3.37079	11.4625	10.1562	8.33333	4.82955	1.06101	9.20245	22.2222	1.81818	0	10	9.09091
1810013L24Rik	22.8814	8.7395	14.1975	8.21918	8.06794	20.7838	21.9858	21.9101	24.5059	27.6042	33.3333	11.9318	15.3846	21.4724	8.33333	30.9091	10	16.6667	9.09091
1810014B01Rik	4.23729	0.336134	1.85185	1.36986	1.06157	1.30641	3.5461	0	2.7668	1.04167	8.33333	0.568182	0	1.22699	22.2222	1.81818	6.66667	3.33333	3.0303
1810014F10Rik	5.08475	1.68067	4.32099	1.36986	0.212314	5.93824	2.83688	2.24719	5.92885	15.625	20.8333	3.69318	0.795756	3.68098	19.4444	3.63636	6.66667	0	9.09091
1810018F18Rik	0	0	0	0	0	0	0	0	0	0	0	0	0	0	0	0	0	0	0
1810019D21Rik	0.847458	1.17647	1.23457	0	0	0	0	1.1236	0	0	0	0.284091	0	0	0	0	0	0	0
1810019J16Rik	0	0	0	0	0.212314	0	0	0	0	0	0	0	0	0	0	0	0	0	0
1810020D17Rik	16.1017	6.89076	5.55556	8.21918	3.39703	22.3278	9.21986	6.17978	21.7391	25	12.5	8.52273	4.24403	13.4969	47.2222	10.9091	10	0	18.1818
1810020O05Rik	0	0	0	0	0	0	0	0	0	0	0	0	0	0	0	0	0	0	0
1810021B22Rik	0.847458	0.336134	0.617284	0.342466	0.424628	1.30641	0	0	1.97628	1.82292	4.16667	0.284091	0	1.22699	0	0	0	0	0
1810022K09Rik	24.5763	11.7647	23.4568	19.863	19.1083	34.5606	39.0071	19.6629	36.3636	36.7188	29.1667	38.9205	10.0796	25.1534	5.55556	23.6364	16.6667	30	33.3333
1810024B03Rik	0.847458	0.672269	3.7037	2.39726	1.27389	2.25653	2.12766	1.68539	1.18577	2.86458	4.16667	3.97727	0.795756	1.22699	5.55556	0	0	0	6.06061
1810026B05Rik	13.5593	15.2941	16.0494	45.2055	23.3546	24.228	42.5532	14.6067	20.9486	20.3125	12.5	24.7159	5.83554	19.6319	8.33333	25.4545	30	53.3333	24.2424
1810026J23Rik	2.54237	3.36134	5.55556	6.16438	4.03397	6.65083	8.51064	5.05618	11.0672	7.29167	0	5.68182	1.85676	1.84049	2.77778	5.45455	10	0	9.09091
1810027O10Rik	54.2373	39.6639	30.2469	15.7534	12.3142	60.095	70.922	37.6404	70.751	60.4167	79.1667	47.7273	34.2175	66.2577	50	70.9091	50	46.6667	57.5758
1810029B16Rik	5.9322	1.68067	4.32099	5.13699	3.39703	10.6888	4.96454	3.37079	10.2767	6.25	4.16667	11.3636	1.32626	4.29448	11.1111	5.45455	6.66667	10	12.1212
1810030J14Rik	0	0	0	0	0	0	0	0	0	0	0	0	0	0	0	0	0	0	0
1810030N24Rik	2.54237	1.84874	7.40741	9.58904	4.67091	5.93824	12.0567	3.93258	11.8577	11.9792	0	2.84091	1.32626	4.90798	13.8889	5.45455	3.33333	13.3333	6.06061
1810030O07Rik	9.32203	5.04202	8.64198	7.19178	4.88323	9.38242	12.0567	8.42697	10.6719	12.5	20.8333	3.69318	3.18302	5.52147	2.77778	7.27273	13.3333	6.66667	12.1212
1810031K17Rik	12.7119	15.1261	6.17284	16.7808	15.9236	11.2827	37.5887	15.7303	11.4625	12.5	4.16667	6.53409	11.9363	30.6748	8.33333	3.63636	6.66667	6.66667	12.1212
1810032O08Rik	10.1695	2.01681	8.02469	10.6164	7.431	13.658	8.51064	7.30337	12.6482	15.3646	8.33333	17.8977	1.85676	4.90798	2.77778	3.63636	0	10	18.1818
1810033B17Rik	0	0	0.617284	0	0	0	21.2766	0	0	0.520833	0	0	0	0.613497	0	0	0	0	0
1810034E14Rik	0	0.168067	0	2.05479	0.424628	0.831354	1.41844	0	1.58103	2.08333	0	0.568182	0	0.613497	2.77778	0	0	0	0
1810035I16Rik	0	0	0	0	0	0	0	0	0	0	0	0	0	0	0	0	0	0	0
1810035L17Rik	44.9153	18.4874	27.1605	17.1233	21.8684	41.6865	58.8652	28.0899	53.3597	42.1875	20.8333	39.7727	14.8541	39.2638	33.3333	41.8182	20	10	24.2424
1810037I17Rik	75.4237	51.7647	57.4074	41.4384	30.3609	74.5843	65.9574	77.5281	79.4466	77.0833	66.6667	55.6818	55.4377	60.1227	8.33333	69.0909	73.3333	66.6667	63.6364
1810041L15Rik	0	0	0	0	0.212314	0.118765	0	0.561798	0.395257	0.78125	0	0	0	0.613497	0	0	0	0	0
1810043G02Rik	2.54237	1.68067	5.55556	1.36986	0.849257	9.38242	5.67376	1.1236	12.6482	4.6875	4.16667	2.84091	0.795756	4.29448	0	5.45455	0	3.33333	3.0303
1810043H04Rik	23.7288	9.41176	10.4938	17.4658	17.4098	29.5724	42.5532	10.6742	32.0158	28.6458	25	16.4773	6.6313	23.3129	25	21.8182	20	13.3333	30.303
1810044D09Rik	0.847458	0.336134	0	2.05479	1.06157	0.712589	2.12766	0.561798	2.7668	0	0	1.42045	0.265252	1.84049	2.77778	0	0	0	0
1810046J19Rik	13.5593	14.1176	14.1975	29.4521	22.293	36.6983	54.6099	17.9775	37.9447	39.0625	12.5	12.7841	9.54907	36.1963	25	40	20	30	36.3636
1810046K07Rik	0	0	0	0	0.212314	0	0	0	0	0	0	0	0	0	0	0	0	0	0
1810048J11Rik	5.08475	2.01681	15.4321	1.36986	4.88323	6.53207	2.12766	3.93258	8.69565	4.42708	8.33333	3.97727	1.32626	2.45399	2.77778	1.81818	6.66667	0	9.09091
1810049H13Rik	0.847458	0.336134	1.85185	2.05479	1.27389	1.54394	2.83688	0.561798	2.37154	0.520833	0	0	0.265252	1.84049	13.8889	3.63636	3.33333	0	0
1810053B23Rik	0	0	0	0	0	0.118765	0	0	0	0	0	0	0	0	0	0	0	0	0
1810055G02Rik	5.9322	2.01681	10.4938	1.71233	1.91083	28.0285	6.38298	12.3596	32.4111	36.7188	0	22.1591	3.44828	6.13497	5.55556	3.63636	16.6667	3.33333	27.2727
1810058I24Rik	24.5763	13.9496	18.5185	21.2329	31.6348	41.4489	54.6099	16.2921	52.9644	38.0208	33.3333	25.5682	7.69231	43.5583	44.4444	32.7273	23.3333	50	39.3939
1810062G17Rik	0	0.168067	0	1.0274	0.636943	3.20665	0.70922	0.561798	0	5.20833	0	1.98864	0.530504	1.22699	0	3.63636	3.33333	0	12.1212
1810062O18Rik	0	0	0	0.342466	0.212314	1.30641	0	0	1.18577	2.08333	0	0.568182	0.265252	0	0	1.81818	0	0	0
1810063B05Rik	9.32203	6.21849	5.55556	8.21918	7.00637	8.7886	12.766	4.49438	14.2292	9.63542	12.5	5.68182	3.97878	9.81595	13.8889	9.09091	16.6667	6.66667	6.06061
1810063B07Rik	12.7119	7.73109	6.79012	11.6438	3.82166	10.6888	9.21986	6.74157	15.0198	7.03125	4.16667	6.25	2.38727	14.1104	5.55556	10.9091	3.33333	10	15.1515
1810064F22Rik	0	0	0	0	0	0	0	0	0	0	0	0	0	0	0	0	0	0	0
1810065E05Rik	0	0	0	0	0	0	0	0	0.395257	0	0	0	0	0	0	0	0	0	0
1810074P20Rik	11.0169	6.72269	16.0494	4.79452	3.18471	9.73872	12.0567	6.17978	11.8577	13.8021	16.6667	4.82955	5.03979	5.52147	0	3.63636	6.66667	10	9.09091
2010001E11Rik	0	0	0	0	0	0	0	0	0	0	0	0	0	0	0	0	0	0	0
2010001M06Rik	0.847458	0.168067	3.08642	0	0.424628	3.20665	1.41844	0	1.97628	0.520833	8.33333	0.284091	0	0.613497	0	0	0	0	3.0303
2010001M09Rik	0.847458	0.504202	0	0	54.5648	0.950119	4.25532	0.561798	0.790514	0.520833	0	0	0.530504	1.22699	0	0	3.33333	0	0
2010002M12Rik	0	0.168067	0	0.342466	0	0.950119	0	0	0	0	0	0	0.530504	0	0	0	0	0	0
2010002N04Rik	6.77966	0.672269	30.2469	3.08219	4.4586	27.1971	43.2624	3.93258	20.9486	75.7812	8.33333	18.1818	1.59151	16.5644	2.77778	0	10	13.3333	36.3636
2010003K11Rik	0	0	0	0	0	0	0	0	0	0	0	0	0	0	0	0	0	0	0
2010003K15Rik	0	0.168067	0	0	0	0	0	0	0	0	0	0	0	0	0	0	0	0	0
2010003O02Rik	24.5763	10.5882	11.7284	16.4384	12.3142	27.4347	24.8227	11.236	39.1304	27.3438	12.5	11.6477	8.22281	21.4724	27.7778	12.7273	13.3333	20	42.4242
2010005H15Rik	0	0	0	0	0	0	0	0	0	0	0	0	0.530504	0	0	0	0	0	0
2010009K17Rik	0	0	0	0	0	0.118765	0	0	0	0	0	0	0	0	0	0	0	0	0
2010010A06Rik	0	0	0.617284	0	0	0	0	0	0	0	0	0	0	0	0	0	0	0	0
2010011I20Rik	8.47458	7.05882	7.40741	3.76712	2.76008	2.019	6.38298	5.05618	2.37154	5.20833	0	5.11364	4.50928	4.90798	2.77778	5.45455	16.6667	0	9.09091
2010012O05Rik	5.9322	3.86555	11.7284	4.10959	5.52017	15.0831	18.4397	3.93258	21.3439	20.3125	0	13.6364	2.12202	11.0429	8.33333	9.09091	13.3333	6.66667	15.1515
2010015L04Rik	0	0	0.617284	0.342466	0.424628	0.593824	0	0	0.790514	1.82292	0	0	0	0	0	0	0	3.33333	0
2010016I18Rik	0	0	0	3.42466	0	0	1.41844	0	0	0	0	0	0	0	0	0	0	0	0
2010106C02Rik	0	0	0	0	0	0	0	0	0	0	0	0	0.265252	0	0	0	0	0	0
2010106E10Rik	0	0	0	0	0	0	0	0	0	0	0	0	0	0	0	0	0	0	0
2010106G01Rik	27.1186	13.2773	8.64198	7.19178	8.06794	20.19	28.3688	15.7303	28.8538	19.0104	12.5	11.3636	18.0371	27.6074	0	5.45455	13.3333	3.33333	6.06061
2010107E04Rik	61.8644	32.1008	51.2346	80.137	59.8726	74.7031	93.617	43.8202	83.3992	75	70.8333	65.625	31.8302	76.0736	100	76.3636	50	86.6667	57.5758
2010107G12Rik	0	0	0	0	0	0	0	0	0	0	0	0	0	0	0	0	0	0	0
2010107G23Rik	0	0.336134	0	0.684932	0	0.23753	0.70922	0	0	8.07292	4.16667	0	0.530504	0	0	0	0	0	0
2010107H07Rik	11.0169	4.70588	9.25926	19.863	7.431	15.4394	20.5674	5.61798	16.996	18.4896	37.5	5.96591	2.38727	17.1779	8.33333	3.63636	6.66667	6.66667	6.06061
2010109A12Rik	0	0.336134	0	0.342466	0	0.118765	0	0.561798	0	0	0	0.852273	0	0	0	0	0	0	0
2010109I03Rik	0	0	0	0	0.212314	0	0	0	0	0	0	0	0	0	0	0	0	0	0
2010109K11Rik	5.9322	9.91597	1.85185	3.08219	5.09554	12.5891	25.5319	7.86517	14.6245	4.94792	0	8.23864	2.65252	7.97546	2.77778	7.27273	6.66667	13.3333	6.06061
2010110P09Rik	16.1017	0.336134	0	0	0	1.18765	0	5.05618	0.790514	0.260417	0	0	0.265252	7.97546	2.77778	9.09091	0	0	0
2010111I01Rik	5.08475	4.87395	12.963	3.76712	1.06157	7.71971	4.25532	6.74157	5.13834	16.6667	8.33333	17.3295	3.44828	12.8834	2.77778	10.9091	33.3333	10	18.1818
2010204K13Rik	0	0	0.617284	2.73973	2.12314	0.831354	2.12766	0	0.395257	0.520833	0	9.375	0	0.613497	0	1.81818	3.33333	0	3.0303
2010300C02Rik	0	0.336134	0.617284	0.342466	0	0.118765	0	0	0	0	0	0	0.795756	0	2.77778	0	0	3.33333	0
2010305A19Rik	5.08475	1.51261	3.08642	6.16438	8.28025	2.61283	11.3475	5.05618	3.16206	2.08333	0	4.26136	1.06101	8.58896	2.77778	3.63636	10	6.66667	0
2010308F09Rik	0	0	0	0	0	0	0	0	0	0.260417	0	0	0	0.613497	0	0	0	0	0
2010310C07Rik	0	0.504202	0	0	0	0.118765	0	0	0.395257	0.520833	0	0	0.265252	0	0	0	0	0	0
2010315B03Rik	1.69492	1.17647	0	0.684932	2.54777	1.78147	2.12766	1.1236	2.37154	2.08333	0	0.568182	0.795756	1.84049	0	1.81818	3.33333	0	9.09091
2010317E24Rik	0	0	0	0.342466	0.212314	0.118765	2.12766	0	0	0	0	0	0	0	0	0	0	0	0
2010320M18Rik	2.54237	2.85714	4.93827	0.684932	0.212314	3.68171	4.25532	0	3.95257	5.72917	8.33333	3.125	0.530504	4.90798	11.1111	1.81818	0	0	18.1818
2010321M09Rik	1.69492	4.36975	6.17284	3.76712	4.88323	6.29454	2.12766	5.61798	7.50988	4.16667	0	7.10227	2.91777	4.90798	0	9.09091	3.33333	13.3333	6.06061
2200002D01Rik	76.2712	9.57983	1.85185	2.73973	1.69851	5.70071	5.67376	33.1461	6.32411	1.30208	20.8333	0.852273	16.9761	1.84049	0	7.27273	0	0	9.09091
2200002J24Rik	0	0	0	0	0	0	0	0	0	0	0	0	0	0	0	0	0	0	0
2200002K05Rik	1.69492	0	0	0	0	0.118765	0	0	0	0.260417	0	0	0	0	0	0	0	0	0
2210009G21Rik	3.38983	0.672269	0.617284	1.0274	1.27389	0.475059	2.83688	0.561798	1.18577	0	0	0	1.06101	0	0	0	0	0	0
2210010C04Rik	0	0	0	0	0	0	0	0	0	0	0	0	0	0	0	0	0	0	0
2210010C17Rik	0.847458	0	0	3.76712	0	0	0.70922	1.1236	0.395257	0	0	0	0	0	0	0	0	6.66667	0
2210012G02Rik	1.69492	1.17647	4.93827	4.10959	5.9448	3.20665	7.80142	0.561798	1.97628	3.64583	0	1.42045	0.265252	5.52147	0	3.63636	6.66667	3.33333	6.06061
2210013O21Rik	25.4237	18.8235	16.0494	11.9863	2.76008	29.0974	21.9858	20.2247	38.3399	30.2083	29.1667	9.09091	14.8541	20.8589	8.33333	29.0909	26.6667	23.3333	18.1818
2210015D19Rik	3.38983	2.85714	3.08642	3.08219	5.09554	7.83848	12.766	2.24719	9.09091	11.4583	4.16667	5.96591	1.59151	3.68098	13.8889	3.63636	10	10	6.06061
2210016F16Rik	4.23729	5.21008	9.25926	9.93151	4.4586	10.4513	18.4397	3.93258	16.2055	13.5417	12.5	8.52273	2.12202	10.4294	2.77778	5.45455	3.33333	10	12.1212
2210016L21Rik	4.23729	5.71429	8.64198	7.53425	8.70488	16.8646	13.4752	7.30337	17.3913	18.4896	4.16667	13.6364	6.6313	11.0429	5.55556	7.27273	16.6667	23.3333	15.1515
2210018M11Rik	10.1695	6.89076	7.40741	6.50685	3.82166	6.53207	13.4752	4.49438	5.92885	4.16667	16.6667	4.82955	2.38727	2.45399	0	7.27273	6.66667	10	15.1515
2210019I11Rik	0	0	0	0	0	0	0	0	0	0	0	0	0	0	0	0	0	0	0
2210020M01Rik	0.847458	0	0.617284	0	0.212314	0.23753	7.0922	0	0	0	8.33333	0	0	0	0	1.81818	3.33333	0	0
2210021J22Rik	2.54237	2.52101	6.17284	5.82192	3.39703	7.24466	8.51064	6.17978	5.5336	9.63542	0	3.40909	1.85676	5.52147	11.1111	3.63636	3.33333	6.66667	12.1212
2210039B01Rik	0	0.168067	0	0	0	0.950119	0.70922	0	1.58103	0.78125	0	0	0	0	0	0	0	0	0
2210403K04Rik	36.4407	6.55462	20.9877	4.79452	2.12314	33.2542	49.6454	33.7079	44.2688	43.2292	8.33333	49.7159	18.3024	29.4479	11.1111	30.9091	20	6.66667	36.3636
2210404J11Rik	0.847458	0.672269	3.7037	1.0274	1.27389	1.66271	2.12766	0	1.18577	1.5625	4.16667	1.42045	0.795756	1.22699	0	0	6.66667	3.33333	3.0303
2210404O07Rik	2.54237	0.840336	0	0.684932	0	1.06888	3.5461	0	0.395257	0.260417	4.16667	0	0	3.68098	0	1.81818	0	0	0
2210404O09Rik	0	1.17647	1.23457	2.39726	0	0.950119	2.12766	1.1236	3.55731	0.78125	0	0.284091	0	2.45399	0	0	0	6.66667	0
2210407C18Rik	0	0	0	0	0	0	0	0.561798	0	0	0	0	0	0	0	0	0	0	0
2210408F21Rik	3.38983	2.18487	2.46914	0	0.424628	5.34442	1.41844	3.93258	16.2055	4.42708	0	3.125	0.795756	3.06748	13.8889	1.81818	0	0	3.0303
2210408I21Rik	0.847458	0.840336	0	0	0.424628	2.61283	1.41844	0.561798	2.37154	2.60417	0	1.70455	0.265252	0	0	1.81818	0	0	3.0303
2210409D07Rik	0	0	0	0	0	0	0	0	0	0	0	0	0	0	0	0	0	0	0
2210409E12Rik	0	0	0	0	0	0	0	0	0	0	0	0	0	0	0	0	0	0	0
2210411K11Rik	17.7966	9.57983	3.7037	4.45205	4.4586	8.66983	23.4043	19.1011	11.4625	20.0521	8.33333	5.39773	5.03979	4.29448	2.77778	18.1818	3.33333	6.66667	3.0303
2210414B05Rik	0	0	0	0	0.212314	0	0	0	0	0	0	0	0	0	0	0	0	0	0
2210415F13Rik	0	0	0	0	0	0	0	0	0	0	0	0	0	0	0	0	0	0	0
2210416O15Rik	0.847458	1.51261	0	0.342466	0	0.712589	0	2.24719	0.790514	0.78125	4.16667	0.852273	0.265252	0	0	0	3.33333	0	3.0303
2210417A02Rik	0	0	0	0	0	0	0	0	0.790514	0	0	0	0	1.84049	0	0	0	0	0
2210417K05Rik	0	0	0.617284	0.342466	0	0.475059	1.41844	0	0.395257	0	0	0.284091	0.530504	0	0	0	0	0	0
2210420H20Rik	0	0	0	0	0	0	0	0	0	0	0	0	0	0	0	0	0	0	0
2300002M23Rik	0	0	0	0	0	0	0	0	0	0	0	0	0	0	0	0	0	0	0
2300003K06Rik	0	0	0	0	0	0	0	0	0	0	0	0	0	0	0	0	0	0	0
2300005B03Rik	0.847458	0	0.617284	0	0	0.356295	0	0	0	0	0	0.284091	0	0	0	0	0	0	3.0303
2300009A05Rik	11.8644	5.88235	8.02469	6.16438	8.70488	10.8076	9.21986	4.49438	9.09091	7.8125	8.33333	6.53409	3.71353	9.20245	8.33333	1.81818	3.33333	6.66667	6.06061
2310001A20Rik	10.1695	9.41176	16.6667	5.47945	3.39703	6.88836	14.8936	8.98876	7.50988	6.25	20.8333	4.82955	6.36605	6.74847	2.77778	9.09091	6.66667	6.66667	3.0303
2310001H17Rik	1.69492	4.53782	3.08642	15.0685	7.64331	2.019	4.25532	5.61798	3.16206	2.34375	0	4.26136	1.06101	9.81595	22.2222	7.27273	0	16.6667	6.06061
2310001H18Rik	0	0	0	0	0	0	0	0	0	0	0	0	0	0	0	0	0	0	0
2310001K24Rik	0	0	0	0	0	0	0	0	0.395257	0	0	0	0	0	2.77778	0	0	0	0
2310002D06Rik	0	0	0	0	0	0	0	0	0	0	0	0.284091	0	0	0	0	0	0	0
2310002J15Rik	0	0	0	0	0	0	0	0	0	0	0	0	0	0	0	0	0	0	0
2310002L09Rik	0	0	0	0	0.212314	0	0	0	1.18577	0	0	0	0	0	55.5556	0	0	0	0
2310002L13Rik	0	0	0	0	0	0	0	0	0	0	0	0	0	0	0	0	0	0	0
2310003C23Rik	4.23729	6.38655	4.32099	5.82192	8.70488	9.14489	14.1844	6.74157	9.09091	7.8125	8.33333	3.97727	1.59151	7.97546	8.33333	5.45455	3.33333	6.66667	12.1212
2310003F16Rik	43.2203	31.5966	26.5432	49.6575	46.7091	61.0451	71.6312	34.8315	67.5889	63.5417	33.3333	44.0341	22.0159	42.9448	16.6667	43.6364	50	56.6667	60.6061
2310003H01Rik	1.69492	1.0084	1.23457	1.36986	2.76008	4.75059	8.51064	6.17978	7.11462	4.42708	8.33333	5.68182	1.06101	3.68098	0	5.45455	10	10	9.09091
2310003L22Rik	3.38983	1.68067	4.32099	3.76712	2.9724	5.10689	4.25532	2.24719	5.92885	6.77083	4.16667	3.69318	2.38727	5.52147	41.6667	1.81818	0	3.33333	6.06061
2310004I24Rik	6.77966	5.71429	3.7037	6.16438	5.52017	4.75059	4.96454	2.24719	6.32411	4.6875	8.33333	4.82955	1.32626	0.613497	2.77778	9.09091	6.66667	6.66667	6.06061
2310004N24Rik	7.62712	3.52941	9.87654	11.3014	7.21868	15.9145	27.6596	3.93258	21.7391	19.5312	33.3333	8.80682	2.65252	18.4049	0	5.45455	30	13.3333	12.1212
2310005A03Rik	0	0	0	0	0	0	0	0	0	0	0	0	0	0	0	0	0	0	0
2310005E17Rik	0	0	0	0	0	0	0	0	0	0	0	0	0	0	0	0	0	0	0
2310005G13Rik	0	0	0	0	0	0.118765	0	0	0	0	0	0	0	0	0	0	0	0	0
2310007B03Rik	0	0	0	0	0	0	0	0	0	0	0	0	0	0	0	0	0	0	0
2310007L24Rik	0	0	0	0	0	0	0	0	0	0	0	0	0	0	0	0	0	0	0
2310008H04Rik	1.69492	2.01681	2.46914	1.36986	0.636943	4.63183	3.5461	2.24719	4.74308	3.90625	0	5.11364	0.795756	4.90798	0	5.45455	6.66667	0	9.09091
2310008H09Rik	12.7119	15.4622	11.1111	7.87671	13.8004	8.4323	16.3121	11.7978	13.0435	8.07292	8.33333	17.6136	8.22281	9.81595	5.55556	9.09091	3.33333	6.66667	9.09091
2310008N11Rik	0	0	0	0	0	0	0	0	0	0.260417	0	0.284091	0	0	0	1.81818	0	0	0
2310009A05Rik	9.32203	7.56303	6.79012	8.21918	8.28025	15.677	13.4752	5.61798	18.9723	14.0625	8.33333	5.68182	3.18302	11.0429	8.33333	12.7273	3.33333	6.66667	15.1515
2310009B15Rik	11.0169	4.20168	4.32099	8.56164	3.39703	18.7648	23.4043	4.49438	19.3676	23.6979	8.33333	11.0795	5.57029	9.20245	8.33333	14.5455	3.33333	3.33333	24.2424
2310010J17Rik	5.08475	3.19328	3.7037	7.53425	4.67091	5.93824	9.21986	2.24719	7.11462	6.25	0	5.39773	1.85676	1.84049	2.77778	9.09091	6.66667	3.33333	6.06061
2310010M20Rik	0	0	0	0	0	0	0	0	0	0	0	0	0	0	22.2222	0	0	0	0
2310011J03Rik	10.1695	7.89916	9.87654	15.411	14.862	11.5202	26.9504	6.74157	14.6245	15.1042	4.16667	6.81818	1.59151	17.1779	5.55556	5.45455	20	10	15.1515
2310014F07Rik	0	0	0	0	0	0.118765	0	0.561798	2.7668	0	0	0	0	0	5.55556	1.81818	0	0	3.0303
2310014L17Rik	0	0	0.617284	0	0	0.950119	0.70922	0.561798	0.395257	1.82292	8.33333	0.568182	0.795756	0	0	1.81818	0	0	0
2310015A10Rik	0	0.504202	1.23457	2.05479	2.12314	2.96912	5.67376	1.68539	1.97628	2.08333	0	2.55682	0	0.613497	11.1111	0	3.33333	0	3.0303
2310015B20Rik	0	0.168067	0	0	0	2.73159	1.41844	0.561798	3.55731	3.38542	12.5	28.9773	0	1.22699	50	0	0	0	0
2310015D24Rik	0	0	0	0	0	0.118765	0	0	0	0.520833	0	0	0	0	0	0	0	0	0
2310016D03Rik	0	0	0	0	0	0	0	0	0	0	0	0	0	0	0	0	0	0	0
2310016M24Rik	30.5085	16.6387	27.7778	38.6986	33.758	41.5677	63.8298	20.2247	53.3597	50.5208	33.3333	29.2614	11.1406	41.1043	61.1111	38.1818	36.6667	60	36.3636
2310020H05Rik	0	0	0	0	0	0	0	0	0	0	0	0	0	0	11.1111	0	0	0	0
2310021P13Rik	15.2542	4.20168	8.02469	4.79452	4.88323	10.5701	14.8936	7.86517	13.834	11.9792	0	8.52273	3.97878	11.0429	0	3.63636	6.66667	6.66667	9.09091
2310022A10Rik	4.23729	1.17647	1.85185	3.42466	3.60934	2.85036	17.7305	2.80899	3.95257	2.34375	0	2.27273	1.06101	23.3129	36.1111	1.81818	6.66667	3.33333	0
2310022B05Rik	14.4068	6.72269	32.0988	2.05479	4.03397	16.0333	8.51064	9.55056	18.9723	21.6146	16.6667	6.81818	10.0796	5.52147	0	14.5455	3.33333	3.33333	15.1515
2310028H24Rik	2.54237	2.68908	1.85185	0	0.424628	1.42518	0.70922	1.1236	1.18577	1.5625	4.16667	0.852273	1.32626	5.52147	0	1.81818	13.3333	0	6.06061
2310030A07Rik	0	0	0	0	0	0	0	0	0	0	0	0	0	0	0	0	0	0	0
2310030G06Rik	0	0	2.46914	0	0	0	0	0	0	0.260417	0	0.284091	0	0	5.55556	0	0	0	3.0303
2310030N02Rik	3.38983	3.19328	0.617284	1.36986	1.06157	2.85036	2.83688	2.24719	5.13834	3.90625	0	2.55682	0.265252	0.613497	8.33333	3.63636	6.66667	0	0
2310033E01Rik	0	0	0	0	0	0	0	0	0	0	0	0	0	0	0	0	0	0	0
2310033P09Rik	13.5593	7.39496	11.7284	12.6712	12.7389	7.71971	17.0213	8.98876	8.3004	11.4583	12.5	9.65909	6.89655	7.97546	2.77778	12.7273	6.66667	30	18.1818
2310034C09Rik	0	0	0	0	0	0	0	0	0	0	0	0	0	0	0	0	0	0	0
2310034G01Rik	0	0.840336	0	0	0	0.475059	0	0	0.395257	0.520833	0	0	0	0	0	0	3.33333	0	0
2310034O05Rik	0	0	0	0	0.212314	0	0	0	0	0.260417	0	0	0	0	0	0	0	0	0
2310035C23Rik	5.9322	3.36134	3.08642	5.13699	4.24628	4.63183	12.0567	5.05618	5.92885	3.38542	4.16667	2.84091	1.06101	6.13497	0	12.7273	3.33333	3.33333	0
2310035K24Rik	6.77966	6.55462	5.55556	3.76712	2.33546	2.61283	3.5461	4.49438	2.7668	3.125	8.33333	1.42045	5.30504	5.52147	5.55556	1.81818	0	0	3.0303
2310036O22Rik	50	37.3109	37.6543	51.3699	46.9214	46.9121	59.5745	39.8876	57.7075	52.6042	20.8333	53.4091	32.0955	55.2147	13.8889	58.1818	50	50	48.4848
2310037I24Rik	4.23729	5.71429	5.55556	5.82192	7.21868	7.00713	6.38298	7.30337	11.8577	11.7188	4.16667	11.3636	2.91777	7.36196	5.55556	9.09091	16.6667	3.33333	18.1818
2310039H08Rik	5.08475	5.21008	8.64198	9.93151	10.1911	13.8955	17.7305	5.61798	16.2055	16.1458	8.33333	14.2045	2.38727	4.29448	5.55556	5.45455	10	10	12.1212
2310039L15Rik	0	0	0	0	0	0	0	0	0.395257	0.520833	0	0	0	0	0	0	0	0	0
2310040G24Rik	1.69492	3.86555	1.23457	0.684932	0	0.712589	9.21986	0.561798	0	0.260417	0	1.13636	0.795756	3.68098	61.1111	1.81818	3.33333	0	3.0303
2310042D19Rik	0	0	1.23457	0	0	0.118765	0	0	0	0	0	0.284091	0	0	16.6667	0	0	0	0
2310042E22Rik	0	0	0	0.342466	0	0	0.70922	0	0	0	0	0	0	0	0	0	0	0	0
2310043J07Rik	1.69492	0.168067	0	0	0	0.356295	0	0	0.395257	0	0	0	0	0	0	0	0	0	0
2310043L19Rik	0	0	0	0	0	0	0	0	0	0	0	0	0	0	0	0	0	0	0
2310043O21Rik	0	0	0	0	0	0	0	0	0	0	0	0	0	0	0	0	0	0	0
2310044G17Rik	3.38983	6.38655	4.32099	7.53425	6.15711	3.08789	7.0922	6.17978	3.16206	4.16667	0	2.27273	5.57029	5.52147	0	9.09091	16.6667	16.6667	6.06061
2310044H10Rik	55.0847	31.7647	36.4198	38.3562	31.6348	66.8646	50.3546	43.8202	64.8221	69.7917	70.8333	35.5114	27.321	42.3313	11.1111	65.4545	43.3333	36.6667	66.6667
2310045N01Rik	9.32203	2.01681	5.55556	16.7808	7.21868	9.85748	24.8227	5.61798	10.2767	10.9375	12.5	6.81818	2.65252	6.13497	5.55556	12.7273	6.66667	30	6.06061
2310046A06Rik	0	0	0	0	0	0.23753	0	0	0.395257	0	0	1.13636	0	0	16.6667	0	26.6667	0	0
2310046O06Rik	9.32203	7.39496	2.46914	5.13699	5.9448	4.63183	8.51064	2.24719	5.5336	5.72917	8.33333	3.40909	2.65252	4.90798	2.77778	3.63636	6.66667	6.66667	9.09091
2310047B19Rik	0.847458	1.34454	0	1.0274	1.27389	0.950119	1.41844	0.561798	1.18577	1.04167	0	0.568182	0.265252	1.22699	0	0	3.33333	0	0
2310047M10Rik	12.7119	13.1092	12.963	5.82192	11.465	13.1829	30.4965	12.3596	13.0435	21.875	8.33333	13.6364	7.95756	18.4049	8.33333	10.9091	16.6667	3.33333	15.1515
2310050B05Rik	0.847458	0.168067	0	0	0.424628	0.118765	0	0	0.395257	0	0	0.284091	0	0.613497	16.6667	0	0	0	3.0303
2310050C09Rik	0	0	0	0	0	0	0	0	0	0	0	0	0	0	0	0	0	0	0
2310057J18Rik	0	0	0	0	0	0	0	0	0	0	0	0	0	0	0	0	0	0	0
2310057M21Rik	4.23729	3.02521	3.08642	1.36986	2.12314	3.20665	4.25532	0.561798	4.34783	1.82292	4.16667	3.125	1.06101	3.06748	8.33333	5.45455	3.33333	0	3.0303
2310057N15Rik	0	0	0	0	0	0	0	0	0	0	0	0	0	0	0	0	0	0	0
2310061C15Rik	4.23729	4.87395	5.55556	4.10959	5.73248	8.31354	14.8936	3.93258	9.09091	5.72917	8.33333	1.98864	1.59151	7.97546	16.6667	1.81818	3.33333	6.66667	3.0303
2310061I04Rik	4.23729	4.87395	6.79012	6.84932	3.82166	6.53207	7.0922	1.68539	5.92885	3.90625	4.16667	1.13636	1.59151	4.90798	30.5556	3.63636	3.33333	3.33333	3.0303
2310061J03Rik	4.23729	2.68908	3.08642	3.42466	3.82166	2.13777	0.70922	0	2.37154	1.5625	8.33333	2.84091	0.530504	3.06748	2.77778	7.27273	3.33333	3.33333	0
2310061N02Rik	0	0	0	0	0	0	0	0	0	0	0	0	0	0	0	0	0	0	0
2310065F04Rik	0	0	0	0	0	0	0	0	0	0	0	0	0	0	33.3333	0	0	0	0
2310067B10Rik	3.38983	1.17647	1.23457	1.36986	1.4862	2.49406	7.0922	2.80899	3.95257	3.125	8.33333	2.84091	1.06101	3.68098	2.77778	3.63636	0	6.66667	6.06061
2310068J16Rik	0	0.168067	0	2.05479	0.424628	1.18765	0.70922	0	0.790514	0.78125	0	1.42045	0.795756	0.613497	0	0	3.33333	0	0
2310069B03Rik	0	0	0	0	0	0.118765	0	0	0	0	0	0	0	0	0	0	0	0	0
2310069G16Rik	0	0	0	0	0	0	0	0	0	0.520833	0	0	0	0	0	0	0	0	0
2310079F23Rik	1.69492	0.672269	0	1.0274	1.4862	0.593824	2.83688	0.561798	0	0.260417	0	0.852273	0.265252	0	0	0	0	3.33333	0
2310079G19Rik	0	0	0	0	0	0	0	0	0	0	0	0	0	0	0	0	0	0	0
2310081J21Rik	0	0	0	0	0.212314	0	0	0	0	0.260417	0	0.284091	0	0	8.33333	0	0	0	0
2400001E08Rik	16.9492	16.4706	12.963	25.3425	23.7792	26.0095	43.2624	10.6742	32.4111	29.9479	25	9.94318	11.1406	44.1718	47.2222	18.1818	23.3333	23.3333	21.2121
2400003C14Rik	22.0339	11.0924	17.9012	9.93151	13.8004	25.0594	37.5887	15.7303	28.4585	22.3958	8.33333	28.9773	7.1618	34.3558	11.1111	18.1818	20	3.33333	12.1212
2400009B08Rik	0	0.168067	0.617284	0	0.212314	0.950119	9.21986	0.561798	0.395257	0.520833	0	0	0	1.22699	0	0	0	0	3.0303
2410001C21Rik	16.1017	13.6134	14.1975	17.8082	15.9236	12.4703	36.1702	14.0449	16.6008	16.4062	25	12.7841	7.1618	22.6994	13.8889	10.9091	10	20	12.1212
2410002F23Rik	9.32203	3.36134	9.25926	10.9589	8.70488	13.3017	12.766	7.86517	13.834	16.1458	16.6667	14.2045	8.75332	7.36196	0	10.9091	3.33333	3.33333	15.1515
2410002I01Rik	0.847458	1.0084	1.23457	0.342466	0.636943	1.06888	4.25532	0.561798	1.58103	0.260417	0	0.568182	0	0	0	3.63636	0	0	0
2410002O22Rik	9.32203	9.07563	6.79012	4.10959	7.431	9.26366	9.92908	8.42697	15.8103	12.5	8.33333	7.67045	4.24403	7.36196	8.33333	9.09091	16.6667	20	18.1818
2410003K15Rik	18.6441	7.89916	16.0494	13.3562	8.9172	36.1045	22.695	13.4831	45.0593	40.625	25	27.5568	6.1008	11.0429	22.2222	9.09091	16.6667	13.3333	27.2727
2410003L11Rik	0	0	0	0	0	0	0	0	0	0	0	0	0	0	0	0	0	0	0
2410004A20Rik	0	0	0	0	0	0	0	0.561798	0	0	0	0	0	0	0	0	0	0	0
2410004B18Rik	7.62712	6.05042	10.4938	7.87671	11.0403	16.5083	14.8936	10.6742	16.2055	13.0208	8.33333	11.3636	2.65252	12.2699	8.33333	12.7273	10	6.66667	15.1515
2410004I01Rik	0	0	0	0	0	1.30641	0.70922	0	0.395257	0.260417	0	0	0	0	0	0	0	0	0
2410004N09Rik	11.0169	4.20168	4.32099	21.2329	9.76645	15.7957	23.4043	2.80899	15.415	15.625	12.5	40.625	4.50928	14.1104	5.55556	12.7273	13.3333	23.3333	6.06061
2410004P03Rik	0	0	0	0.342466	0	0.118765	1.41844	0	0.395257	0.260417	0	0	0	1.84049	0	0	0	0	0
2410006H16Rik	45.7627	28.9076	46.2963	62.6712	57.1125	67.696	82.2695	29.7753	72.7273	59.1146	33.3333	85.7955	24.6684	63.8037	13.8889	60	30	50	63.6364
2410007B07Rik	0	0	0	0	0	0	0	0	0	0	0	0	0	0	0	0	0	0	0
2410012E07Rik	0	0	0	0	0	0	0	0	0	0	0	0	0	0	0	0	0	0	0
2410012M07Rik	0	0	0	0	0	0	0	0	0	0	0	0	0	0	0	0	0	0	0
2410015M20Rik	44.0678	23.1933	24.0741	54.4521	44.1614	43.4679	63.8298	24.1573	58.1028	47.1354	41.6667	52.8409	16.9761	32.5153	38.8889	43.6364	40	43.3333	45.4545
2410016O06Rik	6.77966	2.01681	3.7037	6.16438	9.12951	7.00713	9.92908	5.05618	5.92885	8.59375	0	10.7955	0.795756	3.06748	0	5.45455	13.3333	0	9.09091
2410017I17Rik	0	0	0	0	0	0	0	0	0	0	0	0	0	0	0	0	0	0	0
2410017P09Rik	12.7119	7.56303	6.17284	5.13699	5.09554	8.31354	20.5674	3.93258	9.09091	10.4167	0	7.67045	3.97878	10.4294	5.55556	10.9091	0	10	9.09091
2410018L13Rik	0.847458	0.840336	0	0	0	0	0	0	1.18577	0.78125	0	0	0	0	0	0	0	0	0
2410018M08Rik	0	0.504202	0.617284	0	0.424628	1.18765	1.41844	1.1236	2.7668	3.64583	4.16667	0.852273	0.795756	0.613497	0	1.81818	0	0	3.0303
2410021H03Rik	0	0	0	0	0	0	0	0	0	0	0	0	0	0	0	0	0	0	0
2410022L05Rik	0.847458	3.02521	1.85185	0.684932	0.849257	4.038	5.67376	1.1236	6.71937	4.94792	4.16667	1.13636	1.32626	7.36196	5.55556	0	3.33333	3.33333	3.0303
2410042D21Rik	5.08475	6.89076	2.46914	4.10959	2.9724	8.55107	15.6028	5.61798	9.48617	10.6771	20.8333	11.0795	4.50928	6.74847	0	9.09091	10	0	21.2121
2410057H14Rik	0	0	1.23457	0	0	0	0	0.561798	0	0	0	0	0	0	0	0	0	0	0
2410066E13Rik	0	0.336134	1.23457	1.71233	0.424628	4.3943	0.70922	0.561798	8.3004	3.90625	0	1.98864	0.530504	0.613497	0	0	0	3.33333	6.06061
2410075B13Rik	0.847458	0.672269	0.617284	1.71233	1.27389	0.356295	1.41844	1.1236	1.18577	0.520833	0	0	0	0	0	1.81818	0	0	0
2410076I21Rik	0	0.168067	0	0	0	0.118765	0	0	5.13834	0	8.33333	0	0	0	0	0	0	0	0
2410088K16Rik	0	0	0	0	0	0	0	0	0	0	0	0	0	0	0	0	0	0	0
2410089E03Rik	1.69492	1.34454	6.17284	3.08219	2.33546	6.65083	6.38298	3.37079	6.32411	5.20833	8.33333	5.39773	1.32626	1.84049	0	3.63636	0	3.33333	3.0303
2410091C18Rik	4.23729	3.52941	7.40741	3.42466	2.9724	7.83848	9.21986	3.93258	11.4625	11.1979	16.6667	2.27273	2.38727	4.90798	0	3.63636	6.66667	6.66667	6.06061
2410114N07Rik	0	0	0	0	0	0	0	0	0	0	0	0	0	0	0	0	0	0	0
2410124H12Rik	0	0	0	0	0	0	0	0	0	0	0	0	0	0	0	0	0	0	0
2410127L17Rik	10.1695	4.03361	7.40741	10.9589	7.85563	18.6461	10.6383	5.05618	23.7154	25.7812	20.8333	19.8864	6.36605	7.36196	61.1111	14.5455	16.6667	13.3333	24.2424
2410131K14Rik	4.23729	1.17647	1.23457	3.42466	3.18471	1.42518	3.5461	0	0.790514	1.04167	0	1.98864	0.530504	4.90798	0	1.81818	3.33333	3.33333	9.09091
2410137F16Rik	0.847458	0	0	0	0.212314	0	0	0	0	0	0	0	0	0	0	0	0	0	0
2410137M14Rik	0	0	0	0	0	0	0	0	0	0	0	0	0	0	0	0	0	0	0
2410141K09Rik	0	0	0	0	0	0	0	0	0	0	0	0	0	0	0	0	0	0	0
2500003M10Rik	27.1186	17.8151	24.0741	22.9452	15.7113	37.7672	37.5887	29.7753	43.4783	41.9271	25	40.0568	24.9337	25.7669	19.4444	29.0909	23.3333	33.3333	24.2424
2500004C02Rik	0	0.168067	0.617284	0.684932	0.636943	0.593824	0.70922	0.561798	0.790514	0.520833	4.16667	0.568182	0.265252	0.613497	0	1.81818	0	0	0
2510002D24Rik	7.62712	8.06723	3.08642	17.8082	13.5881	7.24466	7.0922	5.61798	7.50988	10.4167	12.5	8.23864	3.71353	6.13497	5.55556	14.5455	0	26.6667	3.0303
2510003D18Rik	0	0	0	0	0	0	0	0	0	0	0	0	0	0	0	0	0	0	0
2510003E04Rik	3.38983	4.70588	7.40741	3.42466	3.82166	11.4014	7.80142	4.49438	14.2292	17.9688	25	6.81818	1.06101	8.58896	8.33333	7.27273	20	3.33333	15.1515
2510006D16Rik	20.339	16.8067	14.1975	26.3699	20.1699	30.1663	37.5887	16.8539	44.664	27.0833	20.8333	31.5341	7.95756	30.6748	11.1111	20	23.3333	20	27.2727
2510009E07Rik	3.38983	3.19328	6.17284	1.0274	0.212314	12.9454	5.67376	2.24719	15.8103	9.11458	8.33333	4.26136	1.06101	8.58896	0	5.45455	3.33333	0	6.06061
2510012J08Rik	5.9322	9.41176	4.93827	10.6164	9.76645	7.71971	17.7305	6.74157	9.48617	8.85417	12.5	8.52273	2.38727	3.68098	8.33333	3.63636	3.33333	6.66667	6.06061
2510039O18Rik	9.32203	9.41176	10.4938	11.9863	11.8896	12.114	16.3121	8.42697	16.6008	11.1979	8.33333	4.54545	2.38727	20.2454	5.55556	7.27273	3.33333	10	9.09091
2510049J12Rik	0	0.168067	0	0	0	0.23753	0	0	0	0	0	0	0	0.613497	0	0	0	0	0
2600006L11Rik	0	0	0	0	0	0.118765	0	1.68539	0.395257	0	0	0.284091	0	0	0	0	0	0	0
2610001J05Rik	27.1186	18.6555	17.284	12.6712	15.4989	42.399	38.2979	13.4831	51.3834	43.2292	37.5	26.1364	7.69231	46.0123	27.7778	20	40	23.3333	36.3636
2610002D18Rik	0	0	0	0	0	0	2.83688	0	0	0	0	0	0	0	0	0	0	0	3.0303
2610002I17Rik	0.847458	1.84874	3.7037	1.36986	0.849257	2.13777	2.12766	1.68539	2.37154	2.34375	0	0.852273	0.265252	2.45399	0	1.81818	3.33333	0	0
2610002J02Rik	14.4068	7.73109	6.79012	14.3836	6.15711	15.5582	16.3121	10.1124	18.1818	16.6667	4.16667	7.10227	3.97878	9.20245	0	3.63636	10	0	6.06061
2610002M06Rik	4.23729	5.54622	3.08642	6.16438	2.9724	6.4133	9.92908	4.49438	11.4625	6.51042	4.16667	1.98864	2.38727	4.29448	2.77778	3.63636	3.33333	10	6.06061
2610005L07Rik	5.08475	8.57143	6.17284	12.6712	16.9851	12.2328	17.7305	7.30337	13.0435	11.1979	16.6667	13.6364	3.97878	7.36196	0	1.81818	20	16.6667	12.1212
2610008E11Rik	0	3.02521	0.617284	2.39726	1.4862	2.49406	1.41844	0	3.16206	2.34375	8.33333	1.98864	0.265252	0	2.77778	0	6.66667	0	9.09091
2610015P09Rik	3.38983	0.840336	3.7037	1.0274	2.54777	1.54394	4.96454	1.68539	3.55731	3.38542	8.33333	0.852273	0.795756	3.06748	0	1.81818	3.33333	0	0
2610016A17Rik	0	0	0.617284	0.342466	0	2.25653	0.70922	0	13.4387	0.520833	0	2.84091	0	0.613497	0	0	0	0	3.0303
2610017I09Rik	0	0	0	0	0	0	0	0	0	0	0	0	0	0	0	0	0	0	0
2610018G03Rik	0	0	0	1.71233	0.424628	0.356295	0.70922	0	0	2.34375	0	0	0	0	0	0	0	0	0
2610019E17Rik	3.38983	1.17647	3.08642	5.47945	4.88323	4.27553	9.21986	2.24719	9.88142	5.98958	0	9.94318	1.85676	3.06748	0	3.63636	3.33333	6.66667	12.1212
2610019F03Rik	5.08475	6.72269	1.23457	13.0137	0.424628	0.831354	0.70922	5.61798	0	0.520833	0	0.568182	3.18302	1.22699	2.77778	1.81818	0	3.33333	0
[truncated: 22,609 more rows]

## Sheet: Spleen
Supplementary File 10D. The percentage of cells that express a gene per cell type in spleen.
[truncated: 23,434 more rows]

[truncated: 2 more sheets: Tongue, Trachea]
