# Supplementary material for: Affected cell types for hundreds of Mendelian diseases revealed by analysis of human and mouse single-cell data
Source: eLife. 2024 Jan 10;13:e84613. doi: 10.7554/eLife.84613 (PMC10830129; doi:10.7554/eLife.84613)
Supplement: Supplementary file 11. [file elife-84613-supp11.xlsx]

## Sheet: Supplementary File 11
Supplementary File 11. The preferential expression of genes in cell types of human tissues.
Data per tissue appear in distinct tabs, as follows: 11A Bone marrow, 11B Lung, 11C Skeletal muscle, 11D Spleen, 11E Tongue, and 11F Trachea.

## Sheet: Bone marrow
Supplementary File 11A. The preferential expression of genes in cell types of bone marrow.
Gene symbol	cd4-positive, alpha-beta t cell	cd8-positive, alpha-beta t cell	cd24 neutrophil	erythrocyte	erythroid progenitor	granulocyte	hematopoietic stem cell	macrophage	memory b cell	monocyte	myeloid progenitor	naive b cell	nampt neutrophil	neutrophil	nk cell	plasma cell
AL627309.6	-0.474308	-0.482012	0.43463	-0.50648	-0.503274	-0.360235	-0.487259	0.0488252	-0.50648	-0.035238	-0.502717	-0.50648	2.81558	2.06813	-0.50648	-0.496205
AL627309.5	-0.463752	-0.457532	1.11966	-0.486698	-0.462775	-0.414875	-0.457175	-0.395915	-0.468638	-0.339126	-0.442249	-0.486698	2.43185	2.27936	-0.486698	-0.468737
AL732372.2	-0.457584	-0.521062	1.22168	-0.0246213	-0.521062	-0.538506	-0.508523	-0.448244	-0.587915	-0.368719	-0.384132	-0.334106	2.83691	1.638	-0.376537	-0.625576
MTND1P23	-0.721457	0.420879	-1.08214	-1.13673	-0.0955096	0.627579	0.240875	1.40259	0.0960785	1.85794	0.285038	1.50323	-1.18787	-1.1283	-0.129319	-0.952887
MTND2P28	-0.759873	-0.146518	0.926517	-0.229203	-0.140085	1.99479	1.44819	-0.424146	0.279061	1.53084	-0.141873	-0.164673	-0.870125	-1.03965	-0.715427	-1.54783
MTCO1P12	-0.389987	0.11838	-0.730399	-0.977257	-0.172231	1.10305	0.326539	-0.512216	-0.168666	3.01612	0.253074	-0.121098	-0.944257	-0.693568	0.703704	-0.811185
MTATP6P1	-0.445344	0.566149	-1.18263	-1.21506	0.361835	0.432372	0.775968	0.937414	1.03472	0.699024	0.45362	1.0241	-1.6658	-1.58724	0.822347	-1.01149
AL669831.1	0.273444	0.595536	0.0540345	-1.31771	-0.533139	-0.189764	-0.207678	-0.454853	0.293242	-0.0122222	-0.640701	-0.83698	2.76786	-0.0654748	1.43352	-1.15912
LINC01128	0.134996	-0.265039	-0.493503	3.62528	0.369325	-0.258589	-0.209185	-0.436497	-0.21672	-0.418174	-0.210068	-0.281415	-0.529482	-0.568101	0.113159	-0.355985
NOC2L	0.290181	0.649018	-1.3641	-1.0686	1.76091	0.577152	0.43972	0.268304	0.318106	-0.0487766	0.444308	0.831956	-1.67717	-1.61511	0.921422	-0.727324
ISG15	1.89129	1.53971	-0.668628	-0.997729	-0.610394	-0.072585	-0.32752	-0.19898	0.277286	-0.109176	0.187685	-0.380202	-0.992426	-1.15255	2.07209	-0.457868
TNFRSF18	0.293933	-0.21963	-0.476239	-0.487502	-0.484717	-0.475332	0.474387	-0.487502	-0.411767	-0.431869	-0.483237	-0.375128	-0.487502	-0.487502	3.26169	1.27791
TNFRSF4	2.92509	0.13787	-0.556444	-0.528893	-0.553549	-0.561299	0.234228	-0.43118	-0.56588	-0.478339	-0.459142	-0.56588	-0.56588	-0.56588	1.12766	1.40751
SDF4	0.401706	0.789321	-1.12053	-1.44671	0.025588	0.46012	0.27529	0.54299	-0.0245682	0.212206	-0.0901865	-0.785699	-1.09862	-1.35292	2.44776	0.764253
B3GALT6	0.0699437	0.565936	-1.32854	-1.55823	0.708201	0.778555	0.611702	0.0292024	0.932039	0.132838	1.35309	0.704066	-1.41566	-1.55823	0.810231	-0.835147
UBE2J2	0.435235	1.83604	-0.564226	-0.270698	1.64026	0.353168	-0.398619	0.610382	-0.579023	0.0169301	0.278035	-0.691506	-0.953187	-1.74981	1.20997	-1.17295
ACAP3	-0.298031	-0.508916	-0.764	-0.79661	-0.439514	1.74084	-0.0577599	2.71866	0.0411666	0.901738	-0.31664	-0.417526	-1.11092	-0.701391	0.0140176	-0.00511305
INTS11	0.529609	1.30025	-0.78818	-1.44733	0.931192	0.156945	1.03457	1.19417	0.0534174	-0.0280873	-0.125752	-0.324579	-1.44536	-1.78752	1.15974	-0.41308
CPTP	0.891705	1.27991	-0.83007	-1.39958	0.319896	-0.766563	-0.0440569	0.208097	1.94827	-0.570518	-0.57145	-0.116545	-0.898296	-1.41112	1.01643	0.943885
AURKAIP1	-0.0959241	0.206102	-1.17279	-1.76845	0.851572	1.66599	-0.181501	1.70972	-0.298226	0.448501	0.0512062	-0.352624	-1.08896	-1.2243	0.855098	0.394589
CCNL2	1.05754	1.53682	-0.186331	0.0911078	-0.59389	-0.409512	-0.0706103	0.330983	0.513278	-0.053343	-0.700571	0.972335	-1.56578	-1.2164	1.75415	-1.45978
MRPL20-AS1	0.301497	0.799495	-1.08284	-1.25459	0.210206	-0.361819	0.345919	-0.355172	1.12793	-0.525391	0.140254	2.22309	-1.2023	-1.07937	1.28595	-0.572846
MRPL20	0.281805	0.723867	-1.14764	-1.41481	1.21867	1.24076	-0.00642126	0.851907	-0.172778	0.539312	0.889542	0.0706207	-1.73288	-1.68584	0.563316	-0.219425
ATAD3B	0.290471	0.443161	-1.12193	-1.51253	1.53486	1.25292	0.0397265	1.42348	0.0287184	-0.0948757	0.396472	-0.659034	-1.51253	-1.16344	0.944678	-0.290155
ATAD3A	-0.196484	-0.488266	-0.771748	-0.888077	2.92221	1.00142	0.446892	0.0679703	-0.502507	-0.224374	1.1979	-0.565895	-0.841644	-0.888077	-0.11392	-0.155399
SSU72	1.01245	1.52736	-0.69584	-2.22512	-0.00590311	0.101318	0.258373	1.24139	0.393053	0.394165	-0.0783138	-0.729731	-0.75348	-0.255615	1.15096	-1.33506
FNDC10	0.00290131	-0.598107	-0.688238	-0.849443	1.43252	0.912533	1.06191	0.562211	-0.750054	0.148348	2.37531	-0.849443	-0.849443	-0.849443	-0.24473	-0.816832
MIB2	0.590573	1.48157	-0.630294	-0.929926	-0.268874	-0.362569	0.334938	-0.487185	-0.316238	-0.468268	-0.167666	0.142079	-0.815592	-0.685139	2.99479	-0.412198
CDK11B	0.684414	1.17508	-0.795453	-2.2467	0.0993524	0.276449	-0.243997	0.188383	0.419629	-0.269334	0.154684	-0.0470541	0.118034	-0.391129	2.23635	-1.35871
SLC35E2B	0.0854756	1.64181	-0.114744	-0.811183	-0.882908	-1.0035	0.00352142	-1.256	-0.0481465	-0.574899	-0.474239	0.544469	0.396205	1.53979	1.96452	-1.01017
CDK11A	0.663174	1.84366	-0.521546	-0.189526	-0.526452	-0.851991	-0.962506	0.555819	0.75227	-0.397334	-1.22003	0.631903	0.589467	-0.446712	1.69111	-1.61132
SLC35E2A	0.298414	0.571383	-0.719336	-1.73554	-0.249918	-0.190612	1.05249	0.234201	0.87609	-0.479539	1.43341	-0.669195	-0.362615	-0.583148	1.9479	-1.42398
NADK	-0.667215	-0.590137	2.13911	-0.796968	-0.47665	-0.0943522	-0.624522	0.230308	-0.56435	0.101019	-0.551265	-0.619064	1.61383	2.0103	-0.41574	-0.694296
GNB1	-0.433722	-0.272057	0.983432	-1.80951	-0.81766	1.02387	-0.547843	1.18128	-0.547387	0.85902	-0.174357	-0.454725	0.750483	1.70191	0.0875748	-1.53031
FAAP20	-0.137212	0.361652	-0.623752	-2.06323	-0.190466	0.928491	0.855532	1.83827	0.631349	0.616682	0.136431	0.854027	-0.883546	-1.30517	0.0669334	-1.08599
SKI	0.0554077	-0.263258	0.254275	-0.98833	-0.386331	-0.0369339	-0.592815	-0.753926	0.0282593	-0.0512149	0.0325664	-0.758399	2.14802	2.52045	-0.0842688	-1.12351
RER1	0.0543299	1.56413	-0.94333	-1.97213	0.44141	0.733405	-0.646977	1.20307	-0.355982	0.757677	-0.265834	-0.560991	-0.810408	-1.00679	1.52909	0.279332
PEX10	-0.141644	0.151874	-1.27814	-0.773839	2.05035	-0.137514	1.40477	0.354586	0.881871	-0.11799	1.04649	-0.193626	-1.34657	-1.6148	-0.233833	-0.0519884
PANK4	0.95995	1.37746	-1.11758	-1.19365	-0.297697	-0.274858	-0.889909	0.110352	0.468832	-0.330775	-0.663854	1.27834	-0.887798	0.189598	2.13619	-0.864607
TNFRSF14-AS1	0.51416	1.14167	0.59989	-0.947826	-0.783911	-0.781246	-0.852857	-0.908242	1.45805	-0.406717	-0.392822	1.70687	-0.584658	-0.947826	1.6162	-0.430728
TNFRSF14	0.844652	1.22668	-0.582431	-1.41089	-1.07649	-0.975468	-0.343426	0.929935	0.954398	-0.000759773	-0.868158	1.70155	-0.424014	-0.473917	1.31465	-0.816311
PRXL2B	0.926124	0.308457	-0.877227	-1.20522	2.179	-0.70061	0.233349	-0.718587	0.573615	-0.479372	1.41455	0.771158	-1.00437	-0.99662	0.407923	-0.832167
MEGF6	1.27775	-0.371285	0.275312	-0.596538	-0.522414	-0.280884	2.69894	-0.942477	0.276248	0.0871165	-0.126955	-0.678859	-0.313766	1.247	-1.00073	-1.02845
TPRG1L	0.646193	0.964048	1.34336	0.987557	-0.401005	-1.03756	-1.07249	-0.61254	-0.249481	-0.527815	-1.23965	-0.3542	0.203602	1.81865	0.916449	-1.38512
WRAP73	0.257145	2.03935	0.989504	-1.8525	-0.450466	-0.539451	-0.376939	1.15264	0.418619	-0.315563	-0.89254	0.444967	-0.797131	-0.217589	1.17393	-1.03398
TP73-AS1	0.232535	-0.448796	-1.15721	-0.544862	2.60457	-0.510313	0.848268	0.0345527	1.01722	-0.19475	0.528438	0.713987	-1.09461	-1.30147	0.039457	-0.767022
SMIM1	-0.456821	-0.459683	-0.495798	1.78239	2.80194	-0.486681	-0.107176	-0.490061	-0.469887	-0.480466	1.14451	-0.432636	-0.49808	-0.505774	-0.484553	-0.361228
LRRC47	0.376652	0.89644	-1.24453	-1.16501	1.57352	0.602362	1.0798	0.0737888	-0.284189	0.0853209	0.474151	0.335801	-1.76071	-1.21832	1.11529	-0.940369
CEP104	0.62596	1.53031	0.213086	-1.40888	-0.118267	-0.53175	-0.447611	-0.150151	0.119945	0.110851	0.742361	0.528605	-1.22988	-1.52325	2.15543	-0.61675
C1orf174	-0.151888	0.840386	-1.06194	-1.09169	1.62017	-0.153839	0.35975	-0.460772	0.262844	-0.270844	1.21932	0.477844	-1.27543	-1.15309	1.79706	-0.957883
KCNAB2	0.286342	1.29854	-0.299662	-1.33587	-1.16591	1.05854	0.37925	1.29023	-0.604609	0.494024	-0.778283	-0.325957	-0.349139	-0.576624	1.91069	-1.28156
RPL22	1.15637	-0.0631859	-1.11406	-1.21951	0.388917	0.643833	1.02056	-0.0113911	0.722128	0.146094	1.61224	1.02206	-1.38942	-1.33056	-0.491412	-1.09267
ICMT	0.0733688	0.168567	-0.819925	-0.887822	1.72623	1.90971	-0.0890371	-0.229465	-0.570583	0.356886	1.24363	-1.18778	-1.12863	-1.18778	0.825819	-0.203185
ACOT7	-0.386084	-0.153249	-0.788881	-0.843117	2.09336	1.68297	0.235498	-0.513565	-0.689034	-0.507381	1.4301	-0.654417	-0.810885	-0.509759	1.14306	-0.72862
TNFRSF25	3.40462	0.632539	-0.510976	-0.311913	0.060046	-0.500808	-0.306908	-0.524982	-0.508107	-0.474188	0.487504	-0.449148	-0.506053	-0.524982	0.551075	-0.517723
NOL9	0.671794	0.672617	-1.16009	-1.18738	0.972152	0.329354	0.26727	-0.314018	0.454482	-0.0651024	0.893347	1.6135	-1.6094	-1.6094	0.848424	-0.777543
ZBTB48	0.095369	1.47271	-0.702238	-1.68304	-0.385986	0.189593	0.588001	1.32147	0.58915	-0.357363	-0.424512	-0.10443	-1.1445	0.359244	1.68968	-1.50313
KLHL21	0.549222	0.311339	0.995403	1.10451	-0.129924	-0.213692	-0.719352	-0.62653	-0.966771	-0.394535	0.465674	-2.10041	1.59299	1.19651	0.230497	-1.29493
THAP3	0.0276013	1.43007	-1.18061	-0.104679	0.502199	0.0126126	0.619491	-0.843401	0.702291	0.352615	0.295296	0.352672	-1.64242	-1.75174	1.80828	-0.580287
DNAJC11	-0.00309986	-0.0230419	-1.18643	-0.260821	2.13772	0.836012	0.535019	1.25032	-0.0432962	0.0475073	0.74411	-0.3868	-1.54757	-1.54757	0.338693	-0.890751
CAMTA1	0.16111	0.0515315	-1.39841	-1.45703	1.01008	0.997103	0.929719	1.22645	-0.00726561	0.479723	1.17782	0.374319	-1.57787	-1.43733	-0.0971864	-0.432759
VAMP3	-0.58661	-0.493945	2.54351	-0.970944	-0.52702	-0.29647	-0.414485	0.377517	-0.631008	0.408929	-0.38795	-0.767842	1.0125	1.8161	-0.311719	-0.770556
UTS2	0.270595	1.97571	-0.515946	-0.521024	-0.411256	-0.251974	-0.344607	-0.294604	-0.476994	-0.209679	-0.195601	-0.521024	-0.521024	-0.521024	2.95764	-0.419189
PARK7	-0.0284881	0.502799	-1.36753	-1.35255	1.38828	0.98887	0.563345	0.414261	0.0247117	0.355122	1.25243	0.0996435	-1.56335	-1.55229	0.86403	-0.58929
RERE	-0.291342	0.0183745	0.838304	-1.36709	-1.21973	-0.571767	0.883855	-0.681341	0.372201	-0.042403	0.181166	2.32166	0.0248828	0.968034	0.218741	-1.65354
ENO1	-0.556156	-0.558638	0.0677633	-1.11496	-0.389925	2.96677	0.59423	0.888755	-0.659873	0.772763	0.386986	-0.802983	-0.210905	0.0841912	-0.536645	-0.931368
SLC2A5	-0.671321	-0.680887	-0.0236779	-0.578346	-0.66471	1.29057	2.63995	-0.649614	-0.166068	0.0848086	-0.406217	1.73315	-0.629143	-0.477929	-0.627949	-0.172613
H6PD	-0.409775	-0.265235	2.91667	-0.845915	-0.854245	-0.0511001	-0.0613623	-0.278018	-0.557036	0.087797	-0.246374	-0.671787	0.867206	1.4929	-0.185257	-0.938463
SLC25A33	0.263548	0.337096	-0.881029	-1.26817	1.33571	0.357879	0.992969	-0.348414	0.301893	-0.487846	2.07183	-0.590057	-1.16115	-1.42915	0.932472	-0.427565
PIK3CD	0.106481	0.582291	1.68506	-1.1571	-1.11264	0.00560538	-0.708315	-0.27459	-0.385021	-0.24168	-1.0642	0.002372	1.98742	1.31669	0.452813	-1.19518
PIK3CD-AS2	-0.37211	-0.412158	-0.622948	-0.622948	1.21332	-0.538097	0.273095	-0.622948	-0.227367	-0.494483	3.10225	-0.188034	-0.470439	-0.622948	-0.383671	0.989481
CLSTN1	1.14035	1.83978	-1.26129	-1.38019	-0.825046	0.043562	0.776739	-0.4335	0.429749	0.422386	0.374941	0.334361	-1.21004	-1.21781	1.29413	-0.328111
CTNNBIP1	-0.528087	-0.0215624	-0.4222	-1.30342	0.153512	1.38227	0.344695	2.5606	-0.739771	0.793797	0.40763	-0.900663	-1.00188	-0.517095	0.523091	-0.730929
LZIC	0.236543	0.297978	0.585682	-1.9603	-0.207411	0.986704	-0.141146	0.525293	-0.17304	1.17416	0.542874	-0.131319	-1.30066	0.407073	1.22562	-2.06806
NMNAT1	-0.62862	-0.687593	1.19149	-1.09679	-0.470177	-0.272939	-0.146892	-0.380131	-0.660809	0.177384	-0.216849	0.37563	0.853734	2.99115	-0.208749	-0.819843
RBP7	-0.597967	-0.59824	0.0426499	-0.60467	-0.599878	-0.551981	-0.598404	2.1206	-0.599756	1.65621	-0.60467	-0.60467	1.57077	1.17206	-0.599039	-0.603021
UBE4B	-0.499924	0.509035	1.92083	0.621911	0.169302	-0.0442196	-0.484611	-0.798904	-0.593482	-0.0176383	-0.0962019	-1.17646	0.573105	2.19075	-0.974205	-1.29928
KIF1B	-0.491108	-0.425468	2.30604	-0.534197	-0.523859	-0.342288	-0.463827	-0.4676	-0.500266	-0.327952	-0.46642	-0.525711	1.56201	2.1049	-0.356881	-0.547379
PGD	-0.698763	-0.705494	1.88646	-0.730507	-0.396231	0.0623405	-0.39527	0.371873	-0.661	0.11195	-0.497422	-0.713899	1.67537	2.10883	-0.706834	-0.711393
CENPS	-0.423131	-0.35139	-0.759958	-0.811338	1.7482	1.20629	0.311436	-0.651353	-0.0420043	-0.548709	2.57982	-0.106027	-0.811338	-0.811338	-0.303172	-0.225985
DFFA	0.115946	0.370441	-1.30636	-1.07643	0.816347	0.477911	0.865195	0.244581	0.402482	0.541048	1.70444	0.189142	-1.50495	-1.68966	0.861446	-1.01158
TARDBP	-0.484275	-0.512665	0.259145	-1.36741	0.104233	1.83234	-0.0423285	-0.287204	0.21544	0.287952	2.02582	0.900261	-1.09512	-0.812247	0.406196	-1.43014
SRM	-0.159167	-0.0455753	-1.08127	-1.09356	1.88564	0.58961	0.541592	-0.220528	-0.194364	-0.428528	1.66282	-0.448141	-1.03421	-1.14007	-0.448216	1.61396
EXOSC10	0.324263	1.17671	-0.99665	-1.27097	1.495	0.728742	0.167463	0.0185753	0.257434	0.0723997	1.27701	-0.14579	-1.6886	-1.28175	0.902697	-1.03653
MTOR	0.154832	0.277968	-0.592999	-1.2702	0.637914	0.844481	-0.164946	1.04328	0.579518	0.373766	0.537686	0.4281	-1.72109	-1.70255	1.65174	-1.07749
UBIAD1	0.703255	0.355694	-1.22219	-0.14785	0.582905	-0.418539	0.00593204	-0.311645	1.11931	-0.560575	0.626311	2.22048	-1.48492	-1.53033	0.668444	-0.60629
FBXO44	1.26575	1.99554	-0.738624	-0.979129	-0.792237	-0.748262	0.031484	-0.250484	0.43624	-0.588147	-0.876875	0.750303	-0.551618	-0.450494	2.00625	-0.509702
FBXO6	-0.338674	0.423929	-0.354446	-0.971505	-0.663844	-0.0920481	-0.266473	0.5507	-0.163106	0.0535783	-0.764511	0.00912698	-0.49555	-0.0520955	3.44233	-0.31741
MAD2L2	-0.31129	0.480742	-0.988778	-1.78504	1.25476	1.3114	0.233664	1.5737	-0.14361	-0.277659	0.206865	-0.464907	-1.14329	-0.685497	1.43622	-0.697285
AGTRAP	-0.744796	-0.304589	0.902623	-1.06217	-0.731111	0.608833	-0.749332	1.62764	-0.943872	1.02416	-0.786509	-0.864455	1.25123	1.4937	0.321631	-1.04298
MTHFR	-0.606656	-0.193746	-0.278306	0.286329	0.537587	-0.5978	-0.194276	-0.145918	0.155949	0.253556	0.776773	2.73973	-0.958983	-1.151	0.931928	-1.55516
CLCN6	-0.522342	-0.128099	-0.607534	-0.0963333	-0.274742	-0.00105463	-0.163628	0.772748	1.01747	0.635955	-0.217776	2.84126	-1.16003	-1.37869	0.174988	-0.892196
AL021155.2	0.2726	0.0693623	1.11123	-1.0008	-0.777809	0.124927	-0.00405589	-0.049601	2.80726	-0.131998	-0.251635	-0.405205	-0.910264	-1.35592	1.00682	-0.504909
RNU5E-4P	-0.911936	-0.950836	1.56373	-0.768352	-1.05116	1.44047	0.222845	-0.250939	0.459451	0.779012	1.33473	-0.124033	-1.39081	-0.974235	1.09981	-0.477751
KIAA2013	-0.592494	1.24147	0.448888	-2.26754	-0.827047	0.097654	-0.849968	0.181292	-0.455041	0.282015	-0.716119	0.860136	1.31619	0.593366	1.45171	-0.764508
PLOD1	-1.07866	-0.766327	0.366922	-1.20282	-0.238266	0.0580556	-0.46193	2.33989	-0.893063	0.510304	-0.635178	-0.956068	0.820444	1.4362	0.880609	-0.180124
MFN2	-0.655719	-0.618295	1.81177	0.440359	-0.449662	-0.155997	-0.648001	-0.444747	-0.671946	-0.347778	-0.426125	-0.42083	1.52127	2.39053	-0.541148	-0.78369
MIIP	-0.359976	-0.0827501	0.624521	-1.21121	-0.193002	0.162652	-0.506966	2.80305	0.801382	-0.260127	-0.872394	0.763013	-0.143393	0.154147	-0.026508	-1.65243
TNFRSF1B	-0.21281	0.718835	0.0873536	-1.0357	-0.92849	-0.359264	-0.905033	1.41984	-0.620448	1.53836	-0.991551	-0.936688	1.59126	0.903062	0.74189	-1.01063
VPS13D	0.664865	0.901959	1.75463	-2.00971	-0.344385	-0.253812	-0.818649	-0.613872	-0.0444592	0.654305	-0.414887	0.751134	-0.231647	0.811956	0.859492	-1.66692
DHRS3	0.271098	0.301519	-0.578019	-0.517271	0.410085	-0.326781	-0.182649	-0.591645	-0.583105	-0.364052	1.36516	-0.591645	-0.571441	-0.591645	3.14073	-0.590345
PRDM2	-0.218009	-0.0512431	1.88646	-1.321	-1.09994	-0.433637	-0.802264	-0.900036	1.09904	-0.206455	-0.625714	0.880201	0.779709	1.38097	0.763301	-1.13139
KAZN	-0.638056	-0.595424	1.28723	-0.664138	-0.0271635	-0.551973	-0.484345	-0.664138	-0.602333	-0.40602	1.07553	-0.664138	2.1608	1.92372	-0.534756	-0.614802
EFHD2	-0.71802	0.416838	0.680848	-0.974791	-0.879388	0.125203	-0.817538	0.538606	-0.741871	0.730582	-0.867748	-0.826928	1.07763	0.721254	2.46596	-0.930638
DNAJC16	0.00140093	0.76157	0.371952	-1.61376	-0.461465	-0.214224	0.301528	-0.178244	0.960514	0.348892	0.635465	2.09773	-0.901263	-1.43184	0.745969	-1.42423
DDI2	-0.302127	-0.359375	-0.366783	3.64057	0.434757	-0.161022	-0.316206	-0.270724	-0.281973	-0.180919	0.146643	-0.407406	-0.539393	-0.377125	-0.166538	-0.492379
PLEKHM2	0.19052	0.331495	-0.623411	-1.87721	0.241294	0.342832	-0.249203	1.98694	1.16598	1.00884	-0.216169	0.371623	-0.439787	-1.28338	0.499818	-1.45019
AL450998.2	-0.0339818	-0.344567	-0.277196	-1.64609	-0.388123	-0.561073	1.18951	0.591554	0.160758	0.125224	0.794273	1.64155	-0.549931	-1.16481	1.7693	-1.30639
SPEN	-0.522326	-0.438097	1.47416	-1.99183	-0.285902	0.476255	-0.744946	-0.854274	0.357336	0.43844	0.610764	0.386912	0.878745	1.37064	0.570954	-1.72683
FBXO42	-0.0303023	0.156415	0.33353	-2.39505	-0.517823	-0.205527	0.115672	0.904874	0.901898	0.615011	-0.607675	0.542535	-0.0426267	0.766308	1.37393	-1.91116
SZRD1	0.251675	0.751745	0.145933	-2.25237	-0.163658	0.940457	-0.411406	0.928076	0.686723	0.0185568	0.413498	-0.100557	-1.02366	0.780527	1.02703	-1.99257
NECAP2	1.41054	1.27997	-0.801767	0.748187	0.698373	-0.887036	-0.778985	0.881882	0.68579	0.418164	-0.198606	-0.0193652	-1.39512	-1.07924	0.793512	-1.7563
NBPF1	0.782079	0.116146	-0.977853	-1.30796	-0.279308	-0.392444	2.10231	-0.314203	1.00202	0.284731	0.31627	1.46739	-1.15609	-1.30796	0.3402	-0.675316
CROCCP2	0.443005	0.847291	-1.09846	2.24682	0.753135	-0.63817	-0.409483	0.196866	0.28665	-0.411514	-0.266575	0.249812	-1.66155	-0.457626	1.24282	-1.32303
CROCC	0.896001	1.12038	-1.02217	-1.03485	-0.406079	-0.476233	2.13772	-0.0993854	0.314384	-0.086128	-0.508936	0.729703	-0.915249	-1.16516	1.40444	-0.888429
BX284668.5	0.123303	0.149286	-0.873753	-0.903627	-0.757528	0.353359	-0.36403	2.80518	0.564942	0.857455	-0.759131	0.714821	-0.860346	-0.903627	0.62441	-0.770713
BX284668.6	0.956821	0.843017	-0.0432134	-0.673458	-0.680808	-0.677736	-0.440591	-0.58706	0.0112924	-0.558348	-0.548185	0.689495	-0.544666	-0.0938551	3.08528	-0.737983
MFAP2	-0.241124	-0.253747	-0.293642	-0.293642	-0.147853	-0.293642	3.74487	-0.293642	-0.236923	-0.129055	-0.249156	-0.293642	-0.293642	-0.293642	-0.217875	-0.213643
ATP13A2	0.869301	0.959557	-0.894962	-1.27567	0.29473	0.10466	0.46346	1.77494	-0.601538	0.772197	0.874434	-0.154062	-1.28258	-1.46569	0.728291	-1.16707
SDHB	-0.349729	0.1126	-1.09034	-0.412928	0.65226	1.10979	-0.443467	1.83926	0.00847808	1.92936	0.494115	-0.634729	-0.778855	-1.28964	0.124362	-1.27054
PADI2	-0.489831	-0.495248	1.81598	-0.440383	-0.492193	-0.372905	-0.49394	-0.461591	-0.45819	-0.351898	-0.495248	-0.495248	2.07392	2.13929	-0.495248	-0.487271
PADI4	-0.455748	-0.4558	2.93275	-0.449603	-0.461431	-0.360479	-0.422393	-0.417962	-0.456329	-0.331573	-0.453454	-0.435445	0.897498	1.77638	-0.444062	-0.462348
RCC2	-0.558325	-0.321003	-1.00289	-1.10563	0.956464	1.60859	0.541001	0.024683	0.0203815	0.278243	2.09357	0.314194	-1.16602	-1.20479	0.494307	-0.972773
ARHGEF10L	-0.451426	-0.460754	-0.4009	-0.460754	-0.44304	0.520584	-0.460754	3.33614	-0.137383	1.20099	-0.274613	-0.460754	-0.460754	-0.125075	-0.460754	-0.460754
ALDH4A1	-0.685992	-0.802359	-0.380919	-0.474469	1.43624	2.82875	-0.117084	0.973761	-0.505535	0.258496	0.374416	-0.139543	-0.784599	-0.854615	-0.448595	-0.677954
IFFO2	1.2748	1.70266	-0.719079	-0.815949	-0.448943	-0.2048	0.375641	-0.463608	-0.226703	-0.10549	-0.224702	-0.615035	-0.815949	-0.815949	2.57784	-0.474736
UBR4	-0.473875	-0.135875	0.341	3.18592	0.223716	-0.155142	-0.599095	0.596264	-0.673439	0.109996	0.0586325	-0.768216	-0.350981	0.403517	-0.24727	-1.51515
EMC1	0.149444	0.0395195	-0.951472	-1.67873	1.01984	0.827548	0.497365	-0.0820312	0.324971	0.753572	1.28631	0.3964	-1.3676	-1.79036	1.16719	-0.591962
MRTO4	-0.0292665	-0.25734	-0.960682	-0.948264	2.56036	0.505163	0.512079	-0.262678	0.239052	-0.212859	1.86071	-0.0930279	-0.959145	-1.01154	-0.407314	-0.535249
AKR7A2	0.060148	0.142964	-1.33454	-1.41981	1.54794	0.917142	1.20273	0.436728	0.21977	-0.196189	1.09981	0.0472822	-1.42611	-1.349	0.784208	-0.733061
PQLC2	-0.45151	-0.140855	-0.1782	-1.46361	-0.136839	2.19107	1.61177	0.360604	0.710253	0.938845	-0.508251	0.174604	-1.01867	-1.46361	-0.263771	-0.361826
CAPZB	-0.0754382	0.34646	1.45037	-1.65217	-0.832105	0.0440271	-0.444385	1.24779	-0.606747	0.523616	-0.661166	-0.774693	1.14876	1.50925	0.27326	-1.49683
MICOS10	-0.203747	-0.0705176	-0.811814	-1.31479	2.08949	1.30158	-0.349839	1.61093	-0.314622	0.824996	0.404867	-0.494752	-1.0138	-1.02272	0.0850967	-0.720363
NBL1	0.200307	-0.213499	-0.548094	-0.571574	2.62734	-0.485155	1.27019	-0.571574	-0.542097	-0.405396	1.83197	-0.571574	-0.571574	-0.571574	-0.31797	-0.559726
CAMK2N1	1.69091	3.10575	-0.461071	-0.469748	-0.457633	-0.46139	-0.454524	-0.469748	-0.209887	-0.405507	-0.442992	-0.0544569	-0.423975	-0.469748	0.441498	-0.457481
CDA	-0.533572	-0.527062	1.49329	-0.532708	-0.538672	-0.344456	-0.527221	-0.164926	-0.534302	-0.0810899	-0.54044	-0.509703	2.38154	2.03002	-0.536658	-0.53404
PINK1	-0.482037	-0.364555	0.508696	2.02845	-0.827608	-0.872993	-0.354695	-0.242824	-0.982084	-0.206145	-0.84518	-0.400629	1.50277	2.05923	-0.0218948	-0.4985
DDOST	0.203052	0.861037	-1.26683	-1.37439	0.872703	0.692316	0.95076	0.233311	-0.150693	-0.338366	0.410387	-0.522169	-1.51508	-1.46191	0.646474	1.75939
HP1BP3	0.385948	0.752213	0.112672	-1.37469	0.705299	1.11218	0.106388	-0.0635733	-0.000724246	0.203223	1.08446	-0.280732	-1.68772	-1.34452	1.66774	-1.37816
EIF4G3	-0.877531	-0.582272	2.31841	-1.31601	-0.525073	-0.352057	-0.0180117	-0.671588	-0.192266	0.032299	0.928361	-0.325651	1.01673	1.64245	0.0155759	-1.09337
ECE1	-0.261094	-0.574342	1.49916	-0.700017	-0.392201	-0.629321	-0.668286	-0.29185	-0.353927	-0.266267	-0.433997	-0.407773	2.23926	2.18179	-0.556091	-0.38505
ALPL	-0.385734	-0.3855	-0.0991901	-0.386438	-0.377636	-0.383925	-0.386116	-0.381895	-0.375995	-0.366509	-0.385703	-0.386438	2.86792	2.20496	-0.386438	-0.38537
USP48	-0.767191	-0.39229	0.461331	-1.93632	0.506893	1.7717	-0.102972	-1.02684	-0.418147	0.328745	1.1714	-0.945766	0.48021	1.62785	-0.137723	-0.62088
HSPG2	-0.547671	-0.751055	-0.70903	0.138578	0.819025	-0.501426	1.59686	-0.679551	-0.43039	1.66095	2.21964	-0.751055	-0.64657	-0.191419	-0.751055	-0.475829
LINC00339	0.00124222	0.909783	-0.669187	-1.28861	-0.24054	-0.126539	0.917188	0.0183789	-0.204592	-0.127426	-0.0384354	1.84969	-1.26583	-1.16198	2.07305	-0.646185
CDC42	-0.44496	-0.178913	1.56267	-0.921616	-0.886648	-0.14712	-0.728057	-0.158699	-0.449325	0.449215	-0.454503	-0.371546	1.68963	2.17486	0.186958	-1.32194
CDC42-IT1	-0.462118	-0.430735	2.15723	-0.597545	-0.639478	-0.17836	-0.531634	-0.60748	-0.517492	-0.143187	-0.413457	-0.491734	1.95515	1.85752	-0.296508	-0.660175
ZBTB40	1.3325	1.78197	-0.476912	-0.625967	-0.163865	-0.38021	0.171703	-0.947668	1.19353	0.0997964	0.175196	-0.27413	-1.40307	-1.44483	1.54674	-0.584776
C1QA	-0.357053	-0.361229	-0.342655	-0.365947	-0.365235	-0.311453	-0.365947	3.20754	-0.342921	1.72381	-0.364595	-0.365947	-0.349619	-0.348645	-0.355493	-0.334609
C1QC	-0.351823	-0.345606	-0.339977	-0.356381	-0.354641	-0.342489	-0.356381	3.24802	-0.351969	1.6534	-0.355286	-0.356381	-0.338223	-0.356381	-0.356381	-0.339494
C1QB	-0.35472	-0.353386	-0.337529	-0.359888	-0.357372	-0.274252	-0.359888	3.31002	-0.357234	1.53594	-0.35952	-0.359888	-0.332187	-0.359888	-0.354935	-0.325278
KDM1A	-0.188379	0.084626	-1.0752	-1.22036	1.8855	0.984539	0.819576	-0.22627	0.0874437	0.0278509	1.81899	-0.119241	-1.20067	-1.18759	0.371399	-0.86221
LUZP1	0.586946	1.03791	-0.940818	-1.05538	-0.17377	0.4817	0.82379	-0.28154	-0.310462	0.582169	1.19058	-0.824392	-1.08467	-1.18424	2.1227	-0.970527
HNRNPR	0.0404246	0.224992	-1.05088	-1.21072	1.27611	1.38543	0.186448	-0.329852	0.157986	0.123541	2.00524	0.481111	-1.30068	-1.37893	0.248996	-0.859206
TCEA3	3.74051	-0.151974	-0.273642	-0.325995	-0.210761	-0.24261	-0.14102	-0.195784	-0.325995	-0.252523	-0.311167	-0.325995	-0.325995	-0.325995	-0.131455	-0.199605
E2F2	-0.420654	-0.455151	0.0209379	3.61116	0.203693	0.523341	-0.379035	-0.231354	-0.383581	-0.294221	-0.331785	-0.477755	-0.427278	-0.351956	-0.309767	-0.296595
ID3	0.154608	-0.265386	-0.443249	-0.463789	-0.460254	-0.453693	-0.449246	-0.400426	2.81991	0.0107804	-0.462074	2.1828	-0.439334	-0.463789	-0.445857	-0.420999
RPL11	1.20332	0.203914	-1.25506	-1.27197	0.643514	-0.0494951	1.47225	0.494505	1.12228	-0.20453	0.430686	1.19091	-1.33159	-1.33623	-0.370205	-0.942298
ELOA	0.11743	0.489934	-1.02801	-0.986392	0.667728	0.508968	-0.221034	0.715237	1.31645	0.446901	1.00681	0.638337	-1.84182	-1.82081	0.828657	-0.838388
ELOA-AS1	-0.282068	-0.165612	-1.03535	0.823379	1.19576	-0.508652	1.36526	-0.639456	-0.459518	-0.688011	1.3384	1.83308	-1.15962	-1.22775	0.262039	-0.651881
PITHD1	0.182384	0.296715	-0.925968	2.64205	1.36089	-0.329999	-0.1721	-0.677358	0.276822	-0.649261	0.660921	-0.0763283	-1.05673	-1.07384	0.569625	-1.02782
LYPLA2	0.646609	1.45513	0.339445	-1.20463	-0.15146	0.246732	-0.411998	0.496387	0.190935	-0.417674	-0.722247	1.15882	-1.00138	-0.381584	1.76855	-2.01163
HMGCL	-0.571628	0.436183	-0.842597	-0.83942	0.575102	0.582795	0.487527	1.40361	-0.119721	0.509154	1.05702	0.797981	-1.44596	-1.65602	1.08958	-1.4636
FUCA1	-0.246638	0.0954591	-0.890423	-0.121765	-0.132321	-0.0976355	0.504865	2.06479	-0.250041	2.1451	0.254904	-1.25566	-1.25566	-1.25566	0.322697	0.117994
CNR2	-0.385916	-0.226542	-0.391346	-0.273534	-0.375527	-0.394278	-0.35591	-0.401064	1.71822	-0.384074	-0.350702	3.20248	-0.390127	-0.401064	-0.191195	-0.399415
PNRC2	0.0752824	0.782122	-1.08997	0.285146	0.298377	1.15529	0.629811	-0.281143	0.254724	-0.0220811	1.29779	0.555574	-1.36698	-1.15361	0.862635	-2.28297
SRSF10	0.393593	0.347166	-0.873025	-1.19594	1.33244	0.810484	0.375657	-0.730646	0.784701	-0.34467	1.27426	0.836566	-1.47149	-1.49805	0.968523	-1.00958
NIPAL3	1.58563	1.24697	-0.630255	-1.25814	0.296689	-0.177612	0.774574	-1.00521	0.408694	-0.464443	0.720097	0.19456	-1.26112	-1.36447	1.56092	-0.626878
RCAN3	3.46159	0.214945	-0.493774	-0.564087	-0.519456	-0.124105	-0.163713	-0.356832	0.433655	-0.233229	-0.359616	0.7417	-0.534729	-0.564087	-0.426542	-0.511719
AL445686.2	2.91267	0.0288129	-0.524728	-0.583852	-0.484041	-0.363168	-0.1289	-0.583852	0.593836	-0.140378	-0.512133	1.85656	-0.583852	-0.583852	-0.40356	-0.499558
SRRM1	0.357379	0.506009	-1.01528	-1.82301	1.13417	1.10727	0.37296	0.118818	0.305689	0.160412	1.05269	0.673093	-1.52621	-0.946263	0.896308	-1.37404
CLIC4	-1.10919	-1.1111	-1.01222	2.18099	0.385874	0.198959	-0.291524	0.149371	0.543255	0.668711	0.14538	0.860144	-0.842095	-1.0432	-1.11052	1.38715
RUNX3	0.514425	1.63253	-0.502146	-0.524516	-0.508674	-0.433325	-0.333393	-0.315978	-0.00470514	-0.403187	-0.369495	-0.307794	-0.530813	-0.552101	3.11157	-0.472392
SYF2	0.14031	0.602882	0.341416	-1.61281	-1.17338	-0.459536	0.575077	0.654288	0.371914	0.342994	-0.346378	0.140059	1.03024	0.872202	1.02679	-2.50606
RSRP1	-0.417626	0.0456282	1.43436	1.9637	-0.659381	-1.00025	-0.381625	-0.844482	-0.31191	-0.644104	-0.8274	0.304244	0.875327	1.27684	0.733385	-1.5467
RHD	-0.292416	-0.289885	-0.296235	3.68778	0.432033	-0.302102	-0.275003	-0.306461	-0.292807	-0.295658	-0.290149	-0.306461	-0.306461	-0.284784	-0.279036	-0.30235
TMEM50A	-0.0398251	1.66541	-0.336908	-1.04417	0.227573	-0.464306	-0.557307	0.744684	-1.13052	0.613937	0.175154	-1.30523	1.42878	0.830765	0.907697	-1.71573
RHCE	-0.289103	-0.307408	-0.331455	3.58917	0.838591	-0.317129	-0.293415	-0.344933	-0.344933	-0.332294	-0.227268	-0.344933	-0.344933	-0.344933	-0.303771	-0.301254
MACO1	-0.216583	-0.0608245	-0.487596	3.56989	0.360969	-0.323589	-0.0311975	-0.365408	-0.196907	-0.387602	0.467892	-0.390465	-0.705554	-0.559189	-0.344998	-0.328835
LDLRAP1	3.42178	0.864137	-0.537903	-0.668034	-0.247848	-0.212434	-0.214061	-0.44102	0.0353203	-0.407198	-0.245573	-0.290102	-0.642223	-0.668034	0.487076	-0.233885
SELENON	0.0184999	-0.567061	-0.780313	-1.14431	0.283501	2.0563	0.672753	0.702281	-0.232562	1.59575	1.28419	-0.525273	-0.927287	-0.926758	-0.508605	-1.00111
MTFR1L	-0.0822139	-0.157859	0.0336236	-1.80201	0.614707	0.574891	1.43841	1.6236	-0.0617065	0.204247	1.04589	0.510113	-1.3285	-1.40019	-0.134422	-1.07858
AUNIP	-0.500163	-0.596853	-0.368051	-0.596853	2.70576	1.38163	-0.0961775	-0.596853	-0.536181	-0.501766	1.60345	-0.596853	-0.470256	0.232	-0.536507	-0.526328
PAQR7	-0.52909	-0.664251	0.568584	-0.415115	-0.176892	-0.148231	2.74703	0.274653	-0.451576	0.461126	1.78059	-0.801139	-0.801139	-0.801139	-0.361277	-0.682134
STMN1	-0.44561	-0.503494	-0.671647	-0.651759	1.92276	1.52929	1.15258	-0.710467	-0.604275	-0.677453	1.56959	-0.573057	-0.738604	-0.755044	0.806265	-0.649077
PAFAH2	0.0861874	1.47055	-0.328526	-0.807887	-0.618464	0.0336034	-0.139976	-0.175204	-0.445027	-0.0116515	-0.417239	-0.0723078	-0.4569	-0.637999	3.19237	-0.671538
PDIK1L	0.352462	0.176066	1.60649	-0.683286	1.21433	0.390736	0.6255	-0.963329	-0.792842	-0.190213	2.05161	-0.118272	-1.37907	-1.19511	-0.419023	-0.676047
ZNF593	-0.453878	-0.381787	-1.30174	-1.18958	1.34436	0.626091	0.744782	1.28632	-0.394614	0.109668	1.26027	0.531992	-1.36672	-1.36672	-0.499788	1.05134
CEP85	-0.0971561	-0.0185034	-0.468972	-1.15639	2.11282	0.993943	0.514782	0.333805	-0.383126	0.229652	1.37597	-0.666677	-1.29863	-1.4303	0.796207	-0.837422
SH3BGRL3	-0.238969	0.337021	-0.168237	-1.11274	-0.965842	0.150089	-0.638604	2.65484	-0.420488	1.59609	-0.803205	-0.492444	0.371491	0.360504	0.417836	-1.04734
UBXN11	0.129114	-0.0900075	-0.29018	-0.72193	-0.552993	0.403976	-0.6034	3.10683	-0.0716604	1.47572	-0.723904	-0.074509	-0.568319	-0.446033	-0.188958	-0.783742
CD52	0.740291	0.802842	-0.646228	-0.652614	-0.658115	-0.562979	-0.282141	-0.20074	2.04383	-0.3226	-0.633261	2.47408	-0.650219	-0.656547	-0.152646	-0.642953
DHDDS	-0.443554	0.353549	-0.790454	-1.40628	0.142064	0.374372	0.30434	-0.431123	0.681296	0.597695	0.711885	1.51419	-1.70875	-1.48026	1.70024	-0.119211
AL513365.1	0.83527	1.17291	-0.088674	-1.36812	-0.320287	0.13767	0.241852	-1.36812	1.16288	1.7384	0.957381	0.30599	-1.27427	-0.861857	-0.168445	-1.10259
HMGN2	-0.594088	-0.435477	0.42233	-1.06209	0.99423	2.99483	0.088387	0.189436	-0.526106	-0.14686	0.872405	-0.279653	-0.906042	-0.613797	-0.10065	-0.896861
RPS6KA1	-0.374084	-0.135169	1.19807	-0.928879	-0.538031	0.0386055	-0.629469	-0.0744741	-0.6262	-0.11394	-0.732554	-0.619371	1.99369	2.24793	0.436945	-1.14307
ARID1A	-0.415313	-0.469526	0.900108	-1.17737	-0.693083	1.06143	-0.492463	-0.220706	-0.581867	0.428083	0.28023	-0.862098	1.56242	1.98589	0.329852	-1.63559
PIGV	-0.331486	1.14598	-0.234789	-1.46153	0.949677	-0.490336	1.35813	-0.546609	-0.376452	-0.0819932	1.04087	-0.740865	-0.414389	-0.909179	2.08331	-0.990348
ZDHHC18	-0.079901	0.00323799	0.453874	-0.61097	-0.513981	-0.486159	-0.487292	-0.518931	-0.473033	-0.522525	-0.539698	-0.408429	2.94711	1.87156	-0.140732	-0.494133
GPN2	-0.0100267	0.788654	-0.528478	-2.42394	0.79768	0.925077	-0.0644466	-0.0380051	0.367395	0.980518	0.963107	-0.326392	-1.06154	-0.0478332	1.14565	-1.46743
GPATCH3	0.508768	0.152983	-0.621272	-1.05351	0.483598	1.32472	-0.114217	1.57208	-0.892803	1.1053	0.0197942	-0.744584	-1.53877	-0.587898	1.49429	-1.10849
NUDC	0.0863562	0.282082	-1.10441	-1.33766	2.15961	0.614264	0.442368	-0.0584022	0.209894	-0.231322	1.63393	0.0781702	-1.24162	-1.22161	0.479663	-0.791304
SLC9A1	-0.222009	0.183867	0.805809	-0.935566	-0.686433	-0.496272	-0.60045	-0.437908	-0.299425	-0.270747	-0.464922	-0.709849	2.3787	2.17302	0.412393	-0.830205
WDTC1	-0.389882	0.0477208	1.37902	-0.141443	-0.446819	-0.612698	-0.574105	-0.595777	-0.588492	-0.42078	-0.614727	-0.576617	1.86888	2.23807	0.6533	-1.22565
TMEM222	0.43496	1.07811	-1.00519	-1.2645	1.31014	-0.670867	0.815207	-0.372732	0.959059	-0.613734	0.0508894	0.664955	-1.0419	-1.1421	1.74417	-0.946461
SYTL1	0.874433	1.57118	0.293291	-1.04187	-1.02819	-0.679711	-0.00224083	-0.835455	0.389175	-0.828987	-0.951841	0.248492	-0.254811	-0.296262	2.53355	0.00926107
MAP3K6	-0.219299	0.92697	-0.829569	-0.977624	-0.688939	1.8432	1.4384	1.47531	-0.352067	0.6055	-0.573721	-0.977624	-0.977624	-0.977624	0.69172	-0.407016
WASF2	-0.422195	-0.289158	0.455522	1.79103	-0.777612	0.192655	1.70183	0.885035	-0.235526	0.922447	-0.335945	-0.0591797	-0.981424	-0.852147	0.0744384	-2.06977
AHDC1	0.448914	0.258631	-0.797672	-0.819287	-0.750478	-0.331213	2.48482	-0.394896	-0.0626742	-0.0577986	0.278703	0.35912	-0.870461	-0.929178	1.98558	-0.802109
FGR	-0.809294	-0.59641	1.89978	-0.765628	-0.827111	0.0945311	-0.820789	0.900063	-0.696648	0.712583	-0.817253	-0.686843	1.38283	1.69919	0.145683	-0.814681
IFI6	1.13748	1.99654	-1.1538	-1.19225	-0.753373	-0.12784	0.501382	0.809737	0.174111	0.919028	-0.260081	-0.569356	-1.18808	-1.30788	1.04244	-0.0280647
FAM76A	0.362096	1.58696	-0.461125	-1.50872	-0.310139	0.0878862	-0.15039	-0.0273787	0.666894	0.458213	0.0524716	1.31896	-1.50872	-1.25974	1.61799	-0.925268
STX12	-0.353632	0.0630869	0.0556947	-1.31904	-0.82545	-0.344354	-0.352027	2.25624	0.295136	2.10793	-0.629347	0.794571	-0.444251	-0.304042	0.118321	-1.11883
PPP1R8	0.14103	0.713407	-0.33626	-1.74786	1.12481	0.38047	0.112522	-0.00428964	0.161698	0.504634	1.61694	0.0775151	-1.13918	-1.54514	1.25285	-1.31315
THEMIS2	-0.742225	-0.207397	0.0963273	-1.06552	-0.929791	-0.0595088	-0.545091	1.99354	-0.608608	1.38116	-0.874158	-0.900301	1.39162	1.10956	0.722108	-0.761716
RPA2	0.440489	1.16967	-0.718745	-1.45887	0.746589	-0.0883458	-0.0855424	-0.416175	0.586892	-0.635606	0.573119	0.426476	-0.987138	-0.933553	2.42087	-1.04013
SMPDL3B	-0.458552	-0.357813	-0.415889	-0.490381	0.363117	-0.313255	0.743918	-0.490381	-0.490381	-0.317857	0.262734	-0.490381	-0.490381	-0.490381	-0.041289	3.47717
XKR8	0.108717	0.898452	0.390461	-1.39442	-0.540779	-0.881602	0.285765	-0.277841	-0.414206	-0.589544	-0.465234	-0.840889	2.22931	0.327828	1.93443	-0.770446
EYA3	0.0780974	0.917449	0.517679	-1.64306	0.345723	0.718028	0.181678	-0.233821	0.0325429	0.1324	0.834585	-0.945254	-0.601534	-1.43654	2.25695	-1.15492
PTAFR	-0.860282	-0.824814	1.73529	-0.786938	-0.786273	0.0546546	-0.363077	1.03816	-0.571337	1.21664	-0.647691	-0.503897	1.70867	1.19598	-0.810189	-0.794905
DNAJC8	-0.0762573	0.526023	-0.932769	-1.32571	1.22707	1.01974	0.440667	0.184235	0.171244	-0.035234	1.41081	0.225436	-1.57962	-1.24979	1.25947	-1.26531
ATP5IF1	-0.190386	0.322921	-0.70448	-0.74556	3.32315	0.0726852	0.0283344	-0.175099	-0.212382	-0.229699	0.572945	-0.279087	-0.852384	-0.963989	0.548906	-0.515871
SESN2	-0.457521	0.0323755	2.0801	-0.760955	-0.604239	-0.424265	-0.302083	-0.459046	-0.613307	-0.432237	-0.625953	-0.504444	1.34615	2.37219	-0.0243647	-0.622409
PHACTR4	-0.012507	0.152643	-0.214491	-1.42724	-0.0405064	0.158137	1.15504	-0.245085	0.145393	0.243849	2.68662	-0.775967	-1.25097	-0.220499	0.796368	-1.15079
RCC1	-0.321346	-0.450417	-0.835823	-1.06922	1.98787	1.61377	0.808471	-0.0859183	-0.628656	0.0392044	1.66766	-0.443345	-0.890692	-0.970151	0.256979	-0.678381
SNHG3	-0.223971	-0.329463	-1.01937	-0.971595	1.24435	0.755998	0.813025	-0.292065	0.105746	-0.00899582	2.5436	0.686681	-1.05741	-1.04308	-0.368328	-0.835122
TRNAU1AP	0.140628	0.966911	0.0534419	-1.72224	0.116966	0.729882	-0.242545	0.195018	0.389347	0.75954	-0.239823	1.57307	-1.30197	-1.23023	1.31069	-1.49868
SNHG12	1.0621	0.738849	-0.500489	-1.18639	0.188347	-0.312409	2.71015	-0.168691	0.531122	-0.555493	0.224945	0.308053	-1.18225	-1.07692	0.140119	-0.92104
TAF12	-0.316437	1.01282	0.938589	-2.20411	-0.470649	-0.629539	-0.179815	0.27103	-0.124901	0.0867115	-0.181276	0.0694785	1.0057	0.404819	1.90877	-1.59119
GMEB1	-0.320269	-0.182006	0.23079	-1.76062	-0.624508	1.06131	-0.00128268	-0.258736	0.195384	-0.282071	1.19419	0.367313	-0.572319	1.06049	1.81582	-1.92348
YTHDF2	0.228847	0.574007	-0.819356	-1.83781	1.09375	1.08891	0.378935	0.338288	-0.176188	0.226082	1.68463	-0.355781	-1.28249	-1.02473	0.985665	-1.10276
EPB41	-0.10055	0.0353761	-0.137549	3.69443	-0.274413	-0.402515	-0.431752	-0.47201	-0.250468	-0.401388	-0.330665	-0.117909	-0.204533	-0.170367	0.0663474	-0.502034
SRSF4	-0.151145	0.629342	0.676174	-2.40213	0.914983	0.468803	-0.771795	-0.606346	0.0975981	-0.0619142	0.996915	-0.417198	0.879096	0.0600145	1.31467	-1.62707
MECR	-0.239312	-0.406589	-0.939274	-0.975148	2.24679	0.489859	0.614824	0.375133	0.416935	-0.174631	2.05472	-0.663093	-0.975148	-0.975148	-0.490478	-0.359442
LAPTM5	-0.25853	-0.226177	0.31029	-1.4283	-1.16692	-0.0128556	-0.837201	1.11347	0.98507	0.728295	-1.0942	1.46635	1.14338	1.13324	-0.553016	-1.30288
PUM1	-0.24678	-0.186245	2.19187	-0.688621	-0.380051	0.89495	-0.233718	-0.181439	0.0720428	1.2497	0.980124	-0.560638	-0.492677	-0.347623	0.237978	-2.30887
SNRNP40	0.0487147	0.759301	-0.983599	-1.31703	2.07795	0.382993	0.705342	-0.00221866	0.147871	-0.54134	0.701805	1.19468	-1.31582	-1.33893	0.397075	-0.916781
ZCCHC17	-0.148499	1.08819	-0.382963	-1.22778	0.3721	0.583437	0.432388	0.172592	-0.185052	-0.141422	0.867921	-0.300226	-1.24271	-1.36633	2.47735	-0.998992
PEF1	-0.112018	0.892772	0.7248	-1.70192	1.07175	-0.0863039	0.976103	0.514833	-0.133243	-0.360558	0.565452	-1.13758	-0.940784	-0.917901	1.85489	-1.2103
PTP4A2	-0.0477298	1.87595	1.61578	-1.42183	-0.0579472	-0.11211	-1.02427	-0.121961	-0.74347	0.353337	0.0647499	-0.969448	0.363012	0.996922	0.781086	-1.55206
KHDRBS1	0.232673	0.41883	-0.744995	-1.71094	1.1564	1.11513	1.29991	-0.0923353	-0.203579	0.159394	1.60704	-0.119165	-1.30894	-0.937174	0.392543	-1.2648
TMEM39B	-0.362324	-0.0934607	-0.807509	-1.52922	0.779716	0.456337	2.16496	0.943052	0.436405	0.146561	1.37261	-0.514974	-1.35266	-0.894856	-0.0498889	-0.694751
KPNA6	0.187032	0.412153	0.814267	1.03397	-0.13957	0.386837	-1.07695	-0.603127	-0.0842151	-0.229976	0.383199	1.22285	-1.38247	-0.150538	1.54137	-2.31483
TXLNA	0.183573	0.681655	-0.812849	-1.34756	-0.0560488	0.912852	0.439463	0.0302384	0.215045	0.358064	1.4381	-0.301286	-1.61763	-1.63965	1.80844	-0.292409
CCDC28B	-0.452948	-0.00462243	-0.725276	-0.572856	1.79988	-0.424871	0.3561	-0.443735	-0.222125	-0.545798	2.30114	-0.438361	-0.721612	-0.779868	1.63132	-0.756363
EIF3I	0.149077	0.0557588	-1.13146	-1.27892	1.61483	0.730759	1.03127	0.190185	0.144231	0.249909	1.15179	0.648856	-1.5062	-1.70054	0.443711	-0.793254
LCK	1.76108	2.5839	-0.47508	-0.466157	-0.484056	-0.469168	-0.466211	-0.439299	-0.30942	-0.463613	-0.480301	-0.432252	-0.478936	-0.486507	1.57975	-0.473724
HDAC1	0.928354	1.58163	-0.355687	-1.61523	0.536555	0.182382	0.201411	0.0870642	0.756329	-0.325947	0.173729	0.208892	-1.26903	-1.09727	1.57905	-1.57222
MARCKSL1	-0.222396	-0.377979	-0.742699	-0.958074	1.97437	-0.769582	0.529619	-0.640016	1.7359	-0.646833	1.68033	0.705141	-0.592124	-0.800895	-0.313863	-0.560904
BSDC1	-0.164103	-0.0328589	-0.00249232	3.6365	0.0917954	-0.625061	-0.271495	-0.495998	-0.308084	-0.45144	-0.106992	0.0166535	-0.433978	-0.246296	0.0749551	-0.681111
ZBTB8A	-0.586057	-0.450183	-0.00329391	-0.711691	0.430203	-0.173737	3.02932	-0.711691	-0.539144	0.0335004	1.67069	-0.711691	-0.33533	-0.212735	-0.49915	-0.229012
ZBTB8OS	-0.414192	1.21207	0.302465	-2.20293	-0.59106	-0.710791	-1.1468	0.976564	0.254684	0.247068	-0.953881	-0.564939	0.819503	0.637651	1.60589	0.528695
RBBP4	-0.156143	-0.0126678	-0.536706	-1.60082	2.35803	0.563783	0.518076	-0.162057	-0.0325956	-0.0109496	1.4937	-0.0928559	-1.18681	-1.17812	0.694046	-0.657908
SYNC	0.0556817	1.19696	-0.868004	-0.957394	-0.00201167	-0.579439	0.533638	-1.11298	0.984086	0.186345	1.07062	1.37697	-1.15141	-1.31057	1.4676	-0.890098
YARS	-0.491638	0.640271	-1.11926	0.201055	1.3642	0.369984	0.639966	-0.577948	-0.600571	-0.294199	2.1537	-0.815499	-1.27349	-1.13145	1.24975	-0.314856
S100PBP	-0.277593	1.12889	0.01144	-1.21557	-0.352772	-0.215163	0.400598	-0.719135	0.177946	-0.255276	0.135649	-0.597206	-0.510816	0.0429984	3.13117	-0.88516
RNF19B	-0.460451	-0.272648	1.58687	-0.61687	-0.677378	-0.419708	-0.619443	-0.183768	-0.602274	-0.197352	-0.59958	-0.152879	1.63922	2.5716	-0.195717	-0.799634
AK2	-0.339794	-0.326562	-0.554212	-1.11676	1.51732	2.28952	0.731997	0.281118	-0.340184	-0.0222659	1.14493	0.061317	-1.24813	-1.18049	-0.0751941	-0.822613
ZNF362	-0.0866559	0.260631	-0.569864	-1.38952	0.300657	0.15922	2.03978	1.04814	-0.577187	0.814814	1.50853	-0.199125	-1.0865	-1.16313	0.13594	-1.19573
PHC2	-0.59011	-0.556986	0.807536	-0.753033	-0.466652	0.0645744	-0.503872	0.463726	-0.682759	0.362708	-0.556079	-0.744063	2.12248	2.35938	-0.565844	-0.761011
RN7SKP16	-0.438283	-0.498331	0.624555	-0.498331	-0.466837	-0.402919	-0.47341	-0.34667	-0.41802	-0.0996896	-0.431926	-0.498331	2.19843	2.70033	-0.461406	-0.489156
SMIM12	-0.24716	0.622249	-0.308185	-1.8005	0.703046	0.366681	-0.0610149	1.36678	0.569873	0.474869	0.723543	0.0298701	-1.35328	-1.1724	1.53113	-1.44551
GJA4	-0.380619	-0.396547	-0.373293	-0.396547	1.58443	-0.396547	0.210738	-0.396547	-0.396547	-0.321386	3.23889	-0.396547	-0.396547	-0.396547	-0.396547	-0.389838
TMEM35B	1.59542	1.45184	-1.0233	-1.05717	0.377688	-0.590025	1.04983	1.43053	0.338833	-0.655436	-0.926015	0.0101346	-1.05717	-1.05717	0.726508	-0.614493
ZMYM6	-0.297942	0.0396319	0.378317	-0.446616	-1.08663	0.406632	0.00678085	0.492058	-0.407657	1.08093	-0.461955	2.81334	-0.913284	-0.897429	0.548888	-1.25507
ZMYM1	0.477293	1.38101	-0.429656	-1.31931	-0.066494	0.265884	1.25076	-0.284046	0.265897	-0.174652	1.0914	0.447474	-1.25826	-1.4487	1.31939	-1.51798
SFPQ	0.0860762	0.180092	0.24696	-1.35913	1.18353	1.13461	0.516547	-0.908739	0.106863	0.190133	2.08395	-0.505771	-0.829438	-0.808122	0.440301	-1.75787
ZMYM4	-0.324819	-0.340765	-0.106075	-1.376	0.0576951	1.73045	0.807562	-0.583149	-0.143441	1.3218	1.45569	0.58001	-1.3494	-1.15021	0.531562	-1.11091
RPL5P4	-0.476976	-0.467242	-0.776216	-1.09608	0.775695	-0.075625	1.1053	-0.179878	-0.180498	0.369766	2.78185	0.80453	-0.943119	-1.09608	-0.0559873	-0.489443
KIAA0319L	-0.390345	-0.402033	2.60887	-0.833032	-0.644069	-0.149696	-0.519733	-0.0859599	-0.62518	0.121549	-0.471017	-0.604107	1.33174	1.75245	-0.402199	-0.687242
AC004865.2	-0.00578301	1.63491	-0.573815	-0.856685	-0.63723	0.286595	0.553247	0.133374	-0.620826	0.0419792	-0.360805	-0.180302	-0.775807	-0.856685	2.85631	-0.638473
PSMB2	-0.278904	0.249793	-1.03264	-1.13146	1.31043	1.36164	0.145718	1.6571	-0.219365	0.642164	0.640196	-0.577393	-1.48863	-1.48292	0.619384	-0.415123
C1orf216	0.507092	1.3584	-1.06091	-1.13749	0.42396	-0.102123	2.18296	0.299826	-0.198197	-0.436591	1.41954	-1.13749	-1.01187	-0.549668	0.175475	-0.732923
CLSPN	-0.53583	-0.516235	-0.359509	-0.449656	1.70706	2.80516	-0.178624	-0.495387	-0.564541	-0.317453	1.19968	-0.601051	-0.591432	-0.554998	-0.157003	-0.390177
AGO4	-0.542781	-0.436345	1.80614	-0.753328	-0.695417	0.0225067	-0.504208	-0.26012	-0.622316	0.105531	-0.625688	-0.498945	2.02448	2.02193	-0.284644	-0.7568
AGO1	-0.451375	-0.535663	0.191502	-1.50743	-1.08826	1.18221	0.264405	0.0243454	-0.423225	1.0706	0.916681	-0.865326	2.18447	0.318336	0.0447094	-1.32599
AGO3	0.118166	0.718717	1.83904	-2.05491	-0.948171	0.41678	-0.0794418	-0.621643	0.254505	0.865026	0.241755	0.0282358	-0.375121	0.209147	1.13535	-1.74744
ADPRHL2	0.588519	1.0738	-1.44469	-1.72254	0.307095	0.235429	0.83327	0.454611	0.0484058	-0.433773	-0.135092	1.7877	-0.71378	-1.01173	1.17298	-1.0402
TRAPPC3	-0.222342	0.685948	-1.26041	0.00214585	0.489275	0.287516	0.601316	2.32756	0.0240347	0.139854	0.11126	0.290541	-1.65831	-1.7717	0.602471	-0.649158
MAP7D1	0.78022	1.05463	-0.334886	-1.34587	-0.826432	-0.0538336	-0.245715	0.530938	-0.923208	0.0348045	-0.833228	-0.931192	1.76204	1.0016	1.53436	-1.20423
THRAP3	-0.20871	0.586298	-0.936865	-1.29662	0.658989	0.455201	0.302219	-0.785385	-0.438079	-0.453075	1.20731	1.50505	0.324391	-0.574757	1.57183	-1.91779
SH3D21	-0.274534	-0.245363	-0.33136	-0.086239	-0.59437	0.0438092	3.36557	0.0524227	0.224117	-0.554305	0.782451	-0.848725	-0.732562	-0.848725	0.26265	-0.21484
EVA1B	-0.0673214	0.450961	-0.31597	-0.857953	-0.462795	0.0349166	2.7578	-0.183341	-0.712601	0.0633763	1.42589	-0.940636	-0.882536	-0.732677	1.00732	-0.584434
STK40	-0.555991	-0.0861327	1.54568	-0.466826	-0.819292	-0.817833	-0.650174	-0.0788321	-0.488942	-0.272798	-0.710626	-0.00403314	1.89305	2.27897	0.0740222	-0.840253
LSM10	0.0554461	0.496447	-0.865532	-0.893888	-0.680073	-0.605866	-0.758348	0.98891	1.95108	0.0356051	-0.806484	2.26814	-0.744347	-0.663478	0.425707	-0.203319
MRPS15	0.124041	-0.0260241	-1.09999	-1.02228	1.96574	0.760453	0.707391	0.583912	-0.0609874	0.197171	1.65007	-1.126	-1.36874	-1.2004	0.174566	-0.258905
CSF3R	-0.485751	-0.486016	0.640544	-0.47958	-0.490463	-0.302179	-0.331587	-0.298607	-0.479785	-0.220311	-0.471175	-0.477469	2.86102	1.99266	-0.481498	-0.489797
ZC3H12A	-0.193837	-0.00029842	1.98742	-0.948386	-0.864484	-0.287442	-0.687505	-0.557614	0.0158502	-0.573898	-0.715011	-0.42801	1.665	2.10211	0.0191303	-0.533024
MEAF6	0.593536	1.56298	-0.844906	-1.45578	0.383669	-0.254353	0.774832	-0.0133018	0.882816	-0.110051	0.171485	0.632076	-1.4419	-1.18554	1.53205	-1.22762
SNIP1	0.415528	0.683361	0.485056	-2.06104	0.257641	-0.0501005	-0.874824	-0.434779	0.262209	-0.882799	0.333798	1.09109	0.157975	1.02298	1.4628	-1.86889
GNL2	0.0835255	-0.0407116	-0.770553	-1.05949	2.36376	0.4476	0.290051	-0.14477	-0.073567	0.247646	1.48303	0.510098	-1.57029	-1.3848	0.256302	-0.637839
C1orf109	0.0150234	0.0544214	-1.24237	1.35765	1.66508	-0.259083	-0.0880529	-0.278806	0.484484	-0.646336	1.63645	0.820264	-1.3311	-1.4478	0.149737	-0.889565
CDCA8	-0.54478	-0.646597	-0.313758	-0.631035	1.88013	2.48486	-0.0717327	-0.555146	-0.648548	-0.524981	0.925815	-0.690113	-0.520289	-0.609388	0.934811	-0.469248
YRDC	0.0915206	0.626562	0.958069	-0.730545	1.84423	0.165286	-0.0536	-1.05742	0.585512	-0.517472	1.59941	-1.31431	-0.303609	-1.44828	0.617848	-1.0632
C1orf122	0.0255726	1.54413	-0.931279	-1.39387	-0.59277	0.236557	-0.306266	0.751434	-0.151659	1.30271	-0.309518	-0.0851057	-1.04405	-1.41489	1.89791	0.471093
MTF1	-0.456878	-0.418533	1.23444	-0.61019	-0.482602	-0.189542	-0.528069	-0.226065	-0.392021	-0.237286	-0.530128	-0.578933	1.60346	2.85813	-0.459112	-0.586669
INPP5B	0.158828	0.695026	0.0131708	-1.00317	-0.0656123	-0.168156	1.36464	-1.48189	0.897366	-0.243082	0.601758	0.367317	-1.32239	-0.750922	2.09356	-1.15644
SF3A3	0.164916	0.571883	-0.696532	-1.6305	1.68846	1.14147	0.588421	-0.292439	-0.13811	-0.288952	1.56771	0.54325	-1.10686	-1.26473	0.238141	-1.08612
FHL3	-0.599781	0.131459	0.274216	-1.25551	-0.167471	-0.248666	0.917746	0.642845	-1.17094	0.489164	0.122723	-1.25551	0.275641	0.341131	2.63596	-1.133
UTP11	-0.636873	-0.180362	-0.593755	-1.53331	1.33902	1.27744	0.858565	0.31959	-0.763732	0.507793	1.81717	0.087785	-1.22496	-1.11994	0.504394	-0.658827
RRAGC	-0.148571	-0.172737	2.26635	-1.70961	-0.780296	0.545856	-0.363759	0.427176	0.0250108	-0.0713998	-0.898099	0.271716	0.787374	1.50496	-0.352852	-1.33111
MYCBP	-0.316745	-0.0856383	2.55153	-1.45441	0.513134	1.16677	-0.602619	0.102467	-0.889908	-0.0824499	0.327008	-0.837938	-0.346006	1.26683	-0.461935	-0.850084
AKIRIN1	1.11869	0.463637	1.08866	-0.729013	-0.755824	-0.817615	-0.700534	-1.09392	-0.170121	-0.676561	0.128647	0.257779	1.60107	1.6659	0.316605	-1.6974
NDUFS5	-0.00792692	-0.0765	-0.849265	-1.27263	1.69495	1.24478	0.444646	1.40637	-0.690184	0.746832	1.25228	-0.860475	-1.11273	-1.04006	-0.38793	-0.49215
MACF1	0.319422	0.993381	-0.180601	-1.33543	-0.641349	0.0717898	0.607836	-0.76737	-0.447724	0.590401	1.02965	-0.071488	-0.832794	-0.712331	2.55345	-1.17685
PABPC4	0.049405	-0.584019	-0.68512	-1.09666	1.53601	0.825965	-0.211179	1.00703	0.121974	1.11833	1.80667	-0.285659	-1.37967	-1.35088	-0.722671	-0.149527
PPIE	0.357396	1.20703	-1.07401	-1.34865	1.06187	0.346441	0.335144	-0.162118	-0.0592798	-0.387907	0.630738	1.11064	-1.42592	-1.42592	1.61242	-0.77787
TRIT1	0.254226	0.548763	-1.14154	-1.30928	1.3384	0.284181	0.9422	-0.175291	0.0848518	-0.151982	1.20668	1.718	-1.30928	-1.30928	-0.00081387	-0.979824
CAP1	-0.463038	-0.385524	1.8359	-0.766943	-0.669953	-0.13681	-0.587255	-0.123703	-0.508107	-0.120375	-0.567245	-0.504939	1.65832	2.3719	-0.301156	-0.731076
PPT1	-0.419017	-0.556215	-0.379107	-1.30861	-0.234692	1.8192	0.183207	1.67262	-0.510742	1.63072	-0.309715	-0.839615	0.813985	0.383795	-0.833008	-1.1128
RLF	-0.103017	0.250986	1.31786	-0.304001	-0.695819	-0.860502	-0.616038	-1.35861	0.663033	-0.4251	-0.24096	-0.180701	1.39106	2.1507	0.476822	-1.46571
AL050341.2	0.144084	0.516886	-0.622467	-1.32177	0.421312	0.257464	1.78663	-0.511551	-0.289702	0.163476	0.340243	2.23337	-1.02622	-1.32177	0.148391	-0.918367
ZMPSTE24	-0.497856	0.0167663	0.574491	-1.67493	0.0149247	0.50376	-0.486277	-0.695734	-1.24215	0.695564	-0.100775	-0.177071	2.31197	1.58022	0.0316886	-0.854592
COL9A2	0.28522	-0.562151	-0.551804	-0.586211	-0.789524	0.244938	-0.316347	-0.0750121	1.76545	-0.473021	-0.697796	2.89205	-0.155464	-0.429338	-0.829458	0.278474
SMAP2	-0.0798589	-0.0825003	-0.0111649	-1.1794	-1.06798	-0.643868	-0.851584	0.101458	0.467264	0.0602681	-0.953731	0.819261	2.60789	1.49354	0.0063266	-0.685924
NFYC	-0.011846	0.269993	0.543473	-2.03492	-0.510263	0.0449959	0.11023	0.917378	0.0229095	0.457769	-0.668451	-0.890463	1.40266	1.5073	0.64674	-1.8075
CITED4	-0.101803	-0.492799	1.84296	-0.69189	-0.620379	2.90819	-0.188114	-0.0832498	-0.589094	0.510372	-0.545741	-0.618024	0.0111275	-0.250245	-0.401957	-0.689353
CTPS1	0.0813525	0.0189671	-1.01972	-0.799049	1.85528	1.11142	0.154494	-0.812836	0.13492	-0.119319	2.10609	-0.512878	-1.10538	-1.10538	0.629698	-0.617666
SCMH1	0.312641	0.422699	-1.05922	-1.24806	0.5541	0.678049	2.53451	-0.392043	0.668855	-0.353176	-0.512229	0.982487	-1.08436	-1.24806	0.130476	-0.386666
HIVEP3	0.712365	2.2376	-0.707094	-0.763916	-0.605421	-0.334222	1.10126	-0.361015	0.0354164	-0.0915123	-0.497325	-0.626879	-0.665206	-0.763916	2.08276	-0.752903
FOXJ3	1.37645	1.74706	-0.232954	-1.12506	-0.621722	-0.504645	0.14295	-0.382658	0.26106	-0.241581	-0.0758795	-0.543969	-0.777754	-0.0834676	2.30886	-1.24668
PPCS	0.250048	0.873006	-0.253564	-2.18239	-0.494831	0.0169951	0.431683	0.836984	0.0178144	0.699564	-0.0607175	2.04539	-0.922429	-0.833653	0.763617	-1.18752
PPIH	0.187391	0.640288	-1.13701	-1.24532	2.51676	0.7092	0.409318	0.0735995	0.0926644	-0.441839	1.10327	0.0825373	-1.21021	-1.05675	0.10179	-0.825679
YBX1	-0.331315	-0.410363	-1.19553	0.0584651	2.44152	0.499288	0.263233	0.83556	-0.158046	0.246034	1.42413	0.180245	-1.27955	-1.26384	-0.46402	-0.8458
P3H1	0.255674	0.737027	-1.06038	-1.57673	1.21378	1.33728	1.38207	0.532153	-0.0658262	0.29831	0.828184	-0.637081	-1.37257	-1.38318	0.0906205	-0.579325
SVBP	-0.773302	-0.838453	-0.10397	2.15479	0.449273	0.519196	0.233508	1.18206	-0.76823	0.541087	0.120434	-1.10684	0.0469327	0.92002	-0.64346	-1.93304
ERMAP	-0.382406	-0.355315	-0.286897	3.6801	0.419086	-0.25079	-0.258798	-0.217875	-0.38815	-0.207349	-0.146476	-0.330774	-0.343575	-0.209187	-0.325941	-0.395652
ZNF691	-0.330547	0.972868	-1.01042	-1.4312	0.873689	-0.58278	1.96236	0.882486	0.502201	-0.715187	0.852278	0.555809	-1.4312	-0.926078	0.372337	-0.546618
SLC2A1	-0.26111	-0.249607	-0.299979	3.73934	0.0127554	-0.297779	-0.266479	-0.310299	-0.247493	-0.303122	-0.223232	-0.246785	-0.260767	-0.263603	-0.22066	-0.301177
EBNA1BP2	-0.217407	-0.280149	-0.907309	-1.04843	2.29359	1.13658	0.840473	0.0390198	-0.23086	-0.185663	1.68376	-0.721827	-1.03529	-1.04843	-0.0448002	-0.273246
TIE1	-0.58857	-0.570471	-0.541544	-0.600916	0.0567962	-0.241896	3.33738	-0.510892	-0.534357	0.570338	0.349531	-0.600916	-0.517408	0.574822	0.411123	-0.593019
MPL	-0.349191	-0.283351	-0.349191	-0.349191	0.568641	-0.322997	3.64207	-0.349191	-0.303679	-0.191388	0.0334292	-0.349191	-0.349191	-0.349191	-0.349191	-0.349191
CDC20	-0.473626	-0.585298	-0.446168	-0.544206	2.80819	1.87111	-0.2591	-0.507831	-0.505072	-0.56	0.710806	-0.593397	-0.5348	-0.593397	0.370065	-0.157272
ELOVL1	-0.55714	-0.228623	-0.882485	0.11795	2.53902	0.44391	0.0475684	1.40301	-0.170069	0.433675	0.085228	-0.462618	-1.32767	-0.839957	0.73415	-1.33595
MED8	0.0114203	0.694703	-0.774228	-0.303638	1.81707	0.363416	-0.545354	0.874248	-0.481116	0.449416	0.29013	0.710713	-1.76148	-2.18248	0.205384	0.631788
SZT2	0.253012	0.689609	0.316336	-1.45589	0.210609	-0.604185	-0.650971	-0.48105	0.87919	0.191525	0.622737	1.27812	-1.32363	-0.560608	2.06074	-1.42555
HYI	0.386491	-0.227672	-0.751656	-0.695125	0.995488	0.00648685	2.80425	-0.788644	-0.317576	-0.345303	0.59631	-0.869775	-0.82928	-0.869775	-0.284391	1.19017
PTPRF	-0.263808	-0.249325	-0.266004	3.74806	-0.223154	-0.248558	-0.168295	-0.290912	-0.262763	-0.244861	-0.252364	-0.215857	-0.290912	-0.290912	-0.263667	-0.216667
KDM4A	-1.14464	-0.864055	0.581821	1.52563	-0.692122	1.27951	0.650359	-0.718459	-0.885807	0.482491	1.69464	-0.7316	-0.464873	0.333552	0.457184	-1.50364
ST3GAL3	-0.119449	-0.0327913	-1.02762	-0.574094	1.58872	0.873181	0.848889	-0.998384	-0.318003	-0.0803541	2.22448	-0.137289	-1.14323	-0.844845	0.7266	-0.985801
DPH2	0.0707678	0.848927	-1.08438	-1.22132	2.595	0.475764	0.353266	-0.477387	0.35534	-0.314304	1.04815	-0.396425	-1.13258	-1.22132	0.179661	-0.0791677
ATP6V0B	-0.916288	-0.747209	0.852589	-1.22827	-0.589264	1.16613	-0.542905	2.05885	-0.718909	1.13018	-0.78804	-0.455087	0.934228	0.98755	-0.601118	-0.542427
B4GALT2	-0.56627	-0.363895	-0.543559	-0.682628	2.82481	0.521579	0.299513	-0.62098	-0.626921	-0.317369	1.35877	-0.682628	-0.682628	-0.682628	-0.334571	1.0994
SLC6A9	-0.317786	-0.317786	-0.317786	3.67481	0.472422	-0.312169	-0.304018	-0.317786	-0.317786	-0.306753	-0.263902	-0.317786	-0.317786	-0.317786	-0.317786	-0.10032
DMAP1	0.68023	1.1841	-0.614666	-1.37734	-0.113322	0.0263503	0.965994	0.132515	1.20098	-0.30224	0.21969	0.709951	-1.32925	-1.39545	1.43728	-1.42483
ERI3	-0.194585	0.153532	-1.16908	-1.21111	2.50935	0.21146	0.868017	0.596739	-0.176156	-0.0311692	1.15117	0.0144129	-1.32042	-1.00444	0.283331	-0.68105
RNF220	0.0862087	0.380835	-1.13766	-1.25115	0.432415	0.17099	2.24455	0.340904	0.144603	0.422659	1.06011	0.562243	-1.34698	-0.9169	0.301208	-1.49404
ARMH1	0.28163	-0.644657	-0.191788	-0.711953	-0.274934	1.28885	3.05806	-0.278805	-0.51384	0.170183	0.626277	0.0520661	-0.764157	-0.504981	-0.771479	-0.820476
RNU5D-1	-0.158882	-0.511926	0.58464	-1.32737	-0.79767	0.795827	0.0262235	-0.997684	2.01155	0.181372	0.85029	1.41527	-1.11509	-1.02041	0.822937	-0.759073
KIF2C	-0.463384	-0.571339	-0.236539	-0.504277	1.16438	3.1073	-0.154236	-0.58741	-0.58741	-0.437124	1.01583	-0.58741	-0.55466	-0.58741	0.310242	-0.326551
RPS8	0.677793	-0.297804	-1.24749	-1.26348	1.13774	0.51566	1.40069	0.30431	0.922152	-0.140997	1.18542	0.918755	-1.31779	-1.31629	-0.7046	-0.774067
PLK3	0.335992	-0.205337	0.947826	-0.679462	-0.863416	-0.205626	-0.648201	0.258453	-0.687813	0.119815	-0.453383	-0.743826	2.88003	1.30621	-0.545238	-0.816019
PTCH2	-0.168449	-0.598492	0.48278	-1.04426	-0.451723	0.544435	0.712219	1.63721	2.15926	-0.0168847	-0.165742	-0.956254	-0.648056	-1.70913	-0.450196	0.673285
EIF2B3	0.215223	0.0388604	-1.33336	-0.519213	2.70074	0.341375	0.0824373	-0.155899	0.668821	-0.28087	0.942724	-0.231431	-1.35297	-1.37966	0.467722	-0.204493
HECTD3	0.00566119	0.871855	-0.349054	0.903885	1.04013	0.204816	-0.142157	1.66923	-0.194808	0.315454	-0.429612	0.319409	-1.83151	-1.97955	0.690332	-1.09408
UROD	-0.454372	-0.489287	-0.529468	2.47538	2.39749	-0.296273	0.023819	-0.294459	-0.533319	-0.414713	0.655623	-0.395976	-0.616246	-0.616406	-0.406594	-0.505195
HPDL	-0.424829	-0.48297	-0.515186	-0.107132	3.1286	-0.254305	0.596084	-0.523051	-0.277988	-0.473573	1.56504	-0.523051	-0.523051	-0.523051	-0.467188	-0.194344
MUTYH	0.899528	1.45724	-1.15038	-1.30051	1.22877	-0.0122609	1.07705	0.123023	0.149431	-0.670882	1.05285	-1.11719	-1.22178	-0.932048	0.946812	-0.529654
TOE1	0.407704	0.106501	-1.20334	-1.44692	1.30096	0.497712	0.8625	-0.296	0.0901391	-0.264912	2.01312	0.446365	-1.39594	-1.19852	0.669021	-0.58839
TESK2	-0.456786	-0.402144	0.586124	-1.54599	-0.375014	-0.760061	-0.0456343	-0.535445	1.71955	-0.61009	-0.576582	2.17816	0.249451	1.28733	0.148278	-0.861137
PRDX1	-0.306694	-0.399743	-1.2929	0.111543	0.831181	-0.0606752	2.13164	1.30986	0.0296102	0.653412	0.903467	-0.527422	-1.33601	-1.39718	-0.889577	0.239491
AKR1A1	-0.403941	-0.253224	-1.11623	-1.23977	0.19901	0.248819	1.75898	1.78915	-0.128704	0.5272	0.469574	-0.139655	-1.25455	-1.28876	-0.443491	1.2756
NASP	-0.152664	-0.228864	-0.854887	-0.941667	1.88559	1.22517	0.255988	-0.550984	-0.0778316	-0.371791	2.31371	0.0599626	-0.917347	-0.99414	0.0864058	-0.73666
GPBP1L1	-0.480082	0.108628	2.00533	1.27626	-0.792257	-0.376971	-0.351707	-0.31459	-1.10633	-0.163245	-0.228444	0.104868	0.0922195	1.72516	0.411048	-1.90988
TMEM69	0.0794811	-0.281447	-1.03916	-1.60862	1.44488	0.0689577	1.8142	0.471856	-0.251066	0.272282	1.53665	0.393661	-1.35011	-0.619944	-0.0498629	-0.88175
POMGNT1	0.0752916	2.20576	-1.16589	-1.68905	0.698759	-0.47136	0.448763	0.290451	0.218233	-0.242956	1.18586	-0.353469	-0.778263	-0.921856	1.17244	-0.672722
RAD54L	-0.542506	-0.559197	-0.471937	-0.658607	2.57508	1.96316	0.326754	-0.658607	-0.612174	-0.268928	0.265423	-0.658607	-0.521736	-0.658607	0.925163	-0.444673
LRRC41	-0.268368	0.392665	-0.425073	-1.43969	1.80221	0.229119	1.24016	-0.479714	0.48879	0.378203	1.28313	-0.747965	-1.58151	-1.33765	0.715055	-0.249368
UQCRH	-0.168434	-0.228679	-1.1386	-1.4266	1.4669	1.01103	1.06102	0.791693	0.164194	0.425907	1.59007	-0.235739	-1.406	-1.3004	-0.21036	-0.396004
NSUN4	-0.576118	-0.0712899	0.310019	-2.32554	0.645475	0.599652	0.829765	-0.647145	0.346447	0.670155	1.5161	1.34728	-0.0974341	-0.857212	-0.386958	-1.3032
MKNK1	-0.479049	-0.273375	0.629514	-0.43041	-0.496344	-0.220278	-0.523812	0.236903	-0.584277	0.136825	-0.513555	-0.678848	3.05459	1.45806	-0.455622	-0.860318
ATPAF1	0.830496	0.652236	-1.06721	-0.996097	2.60762	0.525063	0.143736	0.157481	-0.227905	-0.412452	0.61182	0.0440924	-1.41975	-1.4122	0.0908671	-0.127801
EFCAB14	0.697336	1.25657	0.908676	-1.92929	-0.882373	0.413769	-0.461789	0.569711	0.811943	0.932529	-0.401029	0.463429	-1.0115	-0.843419	0.987279	-1.51183
PDZK1IP1	-0.280706	-0.27869	-0.283948	3.7356	0.0242041	-0.285258	-0.0901157	-0.285707	-0.285707	-0.282351	-0.258789	-0.285707	-0.285707	-0.285707	-0.285707	-0.285707
TAL1	-0.39756	-0.404047	-0.401371	3.50853	0.677408	-0.398568	-0.00874311	-0.407135	-0.399071	-0.345819	0.582864	-0.407135	-0.407135	-0.407135	-0.381624	-0.403454
STIL	-0.613562	-0.63786	-0.320851	-0.611111	1.98096	2.22093	-0.110969	-0.392469	-0.610256	-0.306353	1.69314	-0.733729	-0.733729	-0.323969	-0.0533153	-0.44686
CMPK1	1.62394	0.998039	-1.24338	-0.800387	0.321731	0.159722	0.262828	0.0921119	1.23062	-0.0441562	0.317216	0.81916	-1.76644	-1.4934	0.542506	-1.02012
SPATA6	-0.265102	-0.341145	-0.648501	-0.661214	-0.467854	-0.269272	0.981804	2.76111	0.0600992	1.86733	-0.327552	-0.547755	-0.483338	-0.661214	-0.426413	-0.570982
BEND5	-0.352473	-0.498555	-0.514974	-0.532071	-0.343707	-0.202252	0.626533	-0.532071	1.9835	-0.439895	-0.211101	2.86324	-0.532071	-0.532071	-0.361526	-0.420508
FAF1	0.823052	1.07854	-0.793857	-1.60919	1.30788	0.829827	0.460644	-0.718698	0.187251	-0.0485622	0.937801	0.238312	-1.4266	-1.49479	0.99238	-0.763991
CDKN2C	-0.469573	-0.327963	-0.620052	2.51542	0.595467	1.24599	-0.259212	-0.366029	-0.883407	-0.440341	0.223352	-0.957598	-0.682336	-0.635389	1.6439	-0.582233
RNF11	-0.278189	-0.168583	0.423289	3.34518	-0.535837	-0.408657	-0.31047	-0.2249	-0.616842	-0.27029	-0.578447	-0.785065	0.767491	0.61508	-0.289728	-0.684033
EPS15	-0.350781	1.59678	1.65717	-1.45408	-0.292506	-0.71681	-0.872306	-0.536641	-0.320488	0.0851585	0.411534	-0.177617	0.715195	1.44229	0.458087	-1.64498
OSBPL9	-0.423269	-0.536685	0.843465	-0.62424	-0.169882	-0.381907	-0.260905	-0.819907	-0.450195	-0.355688	-0.121654	-0.452021	2.30137	2.46894	-0.337147	-0.680267
NRDC	-0.676677	-0.317868	0.553313	-0.835299	-0.127707	-0.281485	-0.350194	-0.552686	-0.765738	-0.252412	0.198032	-0.833171	2.72053	1.86229	0.37841	-0.719347
TXNDC12	0.827177	0.836696	-0.796975	-1.47641	0.0340704	0.382989	0.686134	2.72309	-0.177286	-0.0636268	-0.974292	-0.771931	-0.365434	-1.01193	0.168307	-0.0205765
KTI12	0.519278	0.947647	-1.14493	-1.27522	0.432501	0.977761	0.436877	-0.652551	-0.0666334	0.488545	2.04277	-0.772899	-1.12067	-1.27522	0.984022	-0.521272
BTF3L4	0.132686	0.171536	-0.77102	-1.44029	1.31459	0.321169	0.289841	0.66239	-0.199001	1.59224	1.04749	0.738453	-1.43372	-1.31596	0.253743	-1.36415
CC2D1B	0.850491	1.20446	1.98809	-1.70865	-1.11101	0.511679	-0.107859	0.0307749	0.279787	0.0336905	-0.478842	-0.970253	-0.514486	-0.248321	1.31183	-1.07138
ORC1	-0.426966	-0.580415	-0.375704	-0.489683	2.32031	2.34076	-0.174811	-0.326092	-0.617064	-0.357936	1.12863	-0.617064	-0.617064	-0.617064	-0.272402	-0.317436
PRPF38A	0.0670485	0.348675	1.66702	-1.98003	0.624493	0.383474	0.435566	-0.596834	0.286013	-0.352695	0.701644	-0.154941	-1.20508	-0.0561963	1.48109	-1.64924
TUT4	0.432916	0.625603	1.516	-1.57878	-1.0637	-0.786556	-0.15393	-1.36302	0.737049	-0.758545	-0.0704735	0.978973	0.126272	0.949945	1.41141	-1.00318
GPX7	0.278751	0.422791	-0.840302	-1.33351	0.334567	0.258435	1.54374	-1.15203	-0.475819	-0.93963	1.61658	0.611628	-1.24343	-0.970563	0.916746	0.97205
SHISAL2A	1.516	1.45156	-0.381081	-0.727182	-0.727182	-0.65947	-0.688946	-0.727182	1.12862	-0.715832	-0.709388	2.0703	-0.336572	-0.727182	0.712	-0.478475
COA7	-0.246192	-0.6188	-0.810225	-0.907801	2.4384	0.560253	0.673324	-0.289985	-0.322221	0.331379	1.99515	-0.225928	-0.87224	-1.0172	-0.369855	-0.318057
ZYG11B	-0.355408	-0.592605	2.24493	-0.984095	-0.455928	-0.035588	-0.599877	-0.266303	-0.479231	0.391952	-0.0780661	-0.577634	1.56401	1.83862	-0.704999	-0.909784
RPS13P2	1.47943	1.19215	-1.01661	-1.01661	0.781685	0.450656	0.867473	2.05956	-0.202754	-0.470064	-0.548926	-0.675968	-1.01661	-1.01661	-0.272628	-0.594146
ECHDC2	1.40096	1.29808	0.27661	-1.09385	-1.09037	-0.0445516	0.682175	-0.355242	0.724305	-0.371941	-0.754507	0.169844	-1.114	-1.03122	2.04496	-0.741262
SCP2	-0.25687	0.499987	0.959218	-1.72846	-0.580755	0.948535	0.0599884	0.86545	-0.490517	1.30177	-0.327137	0.104654	-1.38785	-0.29747	1.69193	-1.36248
CPT2	-0.306792	-0.0130802	1.12639	-2.04335	0.499998	1.90642	0.72019	-0.0728132	-0.658075	0.300814	1.15352	0.1421	-1.12627	-1.12374	0.257252	-0.762556
CZIB	0.191639	0.635572	-0.713704	-1.66811	1.04109	0.704585	1.35184	0.423886	-0.220441	0.33484	0.99235	-0.762902	-1.39621	-1.02715	1.26912	-1.15641
MAGOH	0.47095	1.21777	-0.956135	-1.47698	1.63864	0.00492137	0.383433	-0.0499736	0.460507	-0.299522	0.71912	0.194788	-1.31296	-1.25839	1.39006	-1.12622
LRP8	-0.32802	0.0337803	-0.640123	-1.00717	0.14557	2.34464	0.333271	-0.425517	-0.555494	1.01938	1.57041	-1.00717	-0.829222	-1.00717	0.905791	-0.552958
NDC1	-0.0420844	-0.0249118	-0.725034	-0.855792	1.76311	2.40881	0.203384	-0.83343	-0.343064	-0.287962	1.43245	-0.402322	-0.925294	-0.745024	-0.120287	-0.502553
YIPF1	-0.772216	0.0172095	0.631273	-1.40928	-0.814119	-0.516717	-0.410571	0.935814	-0.31797	0.0447639	-0.479609	-0.53152	2.40025	1.66572	0.408999	-0.852035
HSPB11	-0.0320512	1.49768	-0.938326	-1.41788	1.32501	0.242302	0.419745	0.0565731	-0.318271	-0.532115	1.24261	-0.245316	-1.20723	-1.2144	1.63819	-0.516527
LRRC42	-0.255542	-0.843249	1.12401	-1.47679	1.68113	-0.440657	0.705022	0.271351	-1.1628	-0.553695	0.27108	-0.940813	1.88071	0.467521	0.161171	-0.888456
TMEM59	-0.0864297	1.37459	-1.12568	-0.381085	-0.331756	-0.881152	0.482404	-0.493143	-0.341251	-0.194768	-0.633655	-0.706586	-0.250074	-0.348766	1.11721	2.80013
TCEANC2	-0.156236	0.286392	0.59613	-1.58465	-0.487161	0.843682	1.68892	0.744268	-0.408406	0.292937	0.809884	0.56825	-1.05614	-1.41704	0.875893	-1.59672
MRPL37	-0.277906	-0.145988	-0.974752	-0.559578	2.94726	0.786165	0.915943	0.266852	-0.474065	-0.15901	0.77332	-0.157602	-1.01796	-1.06924	-0.367268	-0.486168
SSBP3	-0.287742	0.0311654	-0.886437	2.80764	0.879261	-0.36792	0.444585	-0.382788	-0.689148	-0.225204	0.915607	-0.815925	-0.904723	-0.825653	0.995615	-0.688331
ACOT11	-0.456213	-0.510966	-0.506252	0.242667	-0.316875	0.369777	3.3441	-0.548702	-0.484343	0.824481	0.462514	-0.112553	-0.45496	-0.646538	-0.625717	-0.580422
TTC4	0.568393	0.364182	-1.08525	-1.40163	1.2291	0.119122	1.34159	1.33894	0.297141	-0.0888039	0.678977	-0.770124	-1.40163	-1.40163	0.874794	-0.663192
DHCR24	-0.411369	-0.510508	-0.0446952	-0.615917	-0.260577	3.42321	0.0743456	0.266035	-0.176239	0.658863	0.423347	-0.702316	-0.584278	-0.702316	-0.458883	-0.3787
PCSK9	-0.468769	-0.489671	2.04291	-0.489671	-0.482287	-0.458963	-0.489671	-0.431033	-0.489671	-0.287004	-0.489671	-0.489671	2.00332	1.99256	-0.489671	-0.48304
USP24	-0.0463682	0.909983	-0.355216	1.7528	0.596331	0.0634667	-0.335885	-0.946389	0.655462	0.0508414	0.537418	0.562169	-1.43726	-1.4607	1.1788	-1.72546
OMA1	1.06814	1.2476	0.644578	-1.93255	0.169783	-0.588861	0.525868	-0.507714	0.805794	-0.375791	0.816503	-0.513706	-0.708356	-1.17805	1.58494	-1.05817
MYSM1	0.168746	1.33562	0.975977	-1.4838	-0.782354	-0.213667	-0.76089	-1.13556	-0.179266	-0.00363763	-0.112572	-0.115398	0.908153	1.60708	1.31353	-1.52195
JUN	1.91349	1.62685	-0.714258	-1.11653	-0.914749	-0.188634	0.090625	-0.188596	0.698186	-0.13784	-0.609506	-0.495446	-0.657634	-0.835535	1.9039	-0.374325
HOOK1	1.17219	-0.238351	-0.802971	-0.802243	2.36281	-0.860776	-0.0649959	-0.913727	0.698396	-0.741717	1.30374	0.446854	-0.744673	-0.913727	-0.577377	0.676561
NFIA	-0.388215	-0.322294	-0.760949	0.533778	2.79304	0.0707848	0.198275	0.052255	-0.773945	0.642038	1.55125	-0.78872	-0.771072	-0.687921	-0.582331	-0.765982
TM2D1	-0.173225	0.50212	2.16979	-1.31914	-0.847569	-0.041335	0.346026	-0.707808	-0.305011	0.485563	-0.237957	1.29576	-0.0288691	-0.774204	1.26672	-1.63086
PATJ	3.0051	0.89228	-0.562604	-0.734808	-0.660794	-0.589097	-0.0309603	-0.734808	1.26655	-0.55334	-0.3014	0.420776	-0.684501	-0.422352	0.088852	-0.398893
USP1	-0.164708	-0.0653486	-0.220242	-1.32404	1.29255	2.14277	-0.0211843	-0.396802	-0.349872	-0.498156	1.96722	-0.149875	-0.594531	-0.812132	0.35428	-1.15993
DOCK7	-0.434386	-0.00968846	-0.549089	-0.917607	1.06718	0.241857	1.32019	0.0922843	0.181136	0.766891	2.41542	-0.141054	-1.03801	-1.33438	-0.771995	-0.88875
ATG4C	-0.490951	-0.413629	-0.880909	-1.63996	0.284228	0.702745	0.922943	0.349635	0.695833	0.391475	1.63804	1.40711	-1.42702	-1.49502	-0.00384527	-0.0406844
ALG6	0.543399	1.24261	0.939359	-2.07904	0.0681788	-0.106925	-0.36824	-0.778735	-0.962235	-0.290987	0.0655035	1.73823	0.0793354	1.17673	0.0619441	-1.32913
ITGB3BP	-0.0843377	0.00420164	-1.10391	-1.42175	1.56174	1.00531	0.406669	-0.544963	1.01535	-0.116617	1.61467	0.828083	-0.974471	-1.24282	0.0558738	-1.00304
PGM1	-0.379406	0.0426565	0.929412	-1.67168	-0.76039	1.02916	0.463264	-0.500755	-0.566653	-0.634184	-0.393273	-0.563837	0.1628	2.37654	1.26131	-0.79496
RAVER2	-0.397745	-0.496106	-0.499129	-0.494396	0.55284	1.15707	2.18149	-0.766659	0.018376	0.255225	2.09181	-0.816336	-0.526411	-0.816336	-0.816336	-0.627351
JAK1	0.668705	1.04692	0.292959	-1.3316	-1.03775	-0.647782	-0.603343	-0.660869	0.101291	-0.387585	-0.681143	0.4618	0.717634	0.966374	2.33816	-1.24377
DNAJC6	-0.437143	-0.369657	-0.488623	3.12221	1.09709	-0.435602	-0.113075	-0.429231	-0.372271	-0.402376	1.26692	-0.497425	-0.477007	-0.497425	-0.486912	-0.479471
LEPROT	-0.83076	-0.740932	0.140869	0.99512	0.821975	-0.189158	1.69072	0.116263	-0.955248	1.10558	1.78412	-1.27866	-0.387126	-0.418289	-0.635635	-1.21884
LEPR	-0.425578	-0.408668	-0.130802	-0.00740555	0.804243	-0.232055	-0.148291	-0.44878	-0.513371	3.50177	0.29568	-0.551805	-0.353632	-0.551805	-0.316731	-0.512768
PDE4B	0.520109	0.661265	-0.63868	-0.888538	-0.887707	-0.418683	-0.599365	-0.423241	1.72599	-0.119471	-0.832598	2.74284	-0.139018	-0.384648	-0.446776	0.128521
TCTEX1D1	-0.425208	-0.434616	-0.0883176	-0.434616	-0.124648	-0.0912106	3.54917	-0.39271	-0.434616	0.598205	0.430685	-0.434616	-0.434616	-0.434616	-0.413659	-0.434616
MIER1	-0.299024	0.105672	1.50265	-1.10179	-0.518975	-0.124589	-0.486094	-0.519685	-0.674601	-0.302087	-0.168907	-0.419682	2.10117	1.92168	0.286397	-1.30213
SLC35D1	0.337658	0.492824	-0.637788	-1.43027	-0.128182	-0.327615	-0.000590157	-1.14088	0.5337	-0.308313	1.51313	1.69404	-1.26027	-0.104195	1.67431	-0.907545
IL12RB2	0.199252	0.25867	-0.513839	-0.522979	-0.235335	-0.436131	1.90171	-0.522979	-0.522979	-0.306079	-0.16682	-0.522979	-0.522979	-0.522979	2.95555	-0.519098
SERBP1	-0.165404	-0.308353	-0.756807	-0.871534	1.79549	0.89596	0.505466	-0.318778	-0.0894906	-0.0825995	2.47865	-0.278134	-1.05122	-1.04872	0.133856	-0.838382
GADD45A	-0.583166	-0.558782	1.85676	0.60676	-0.374784	-0.561835	-0.462862	-0.595509	-0.603829	-0.540089	-0.313227	-0.657295	1.70143	2.19376	-0.553054	-0.554274
WLS	-0.464837	-0.468057	1.58758	-0.468057	-0.466507	-0.443169	-0.468057	-0.412056	-0.461497	-0.351105	-0.464724	-0.468057	2.70825	1.57479	-0.468057	-0.466427
DEPDC1	-0.494079	-0.582529	-0.252851	-0.429488	1.60912	2.82721	-0.170413	-0.569994	-0.598913	-0.279932	1.25271	-0.598913	-0.57608	-0.598913	-0.141783	-0.395152
LRRC40	-0.0133723	1.44122	-0.417671	-0.642262	1.19454	0.687149	0.0357599	-0.790317	1.00698	0.248866	1.17767	-0.143762	-1.80296	-1.25782	0.694488	-1.41852
SRSF11	0.416479	1.08647	-0.879389	-0.842951	0.762554	0.210049	0.612821	-0.555015	0.322668	-0.0465826	1.15653	0.663786	-1.46739	-1.47505	1.54049	-1.50547
ANKRD13C	1.0965	1.55953	-1.24983	-0.580178	0.0708203	-0.097623	0.38524	0.434243	0.540105	-0.292049	0.785106	0.0709406	-1.68572	-1.29824	1.46394	-1.20279
HHLA3	0.584813	-0.0108552	-1.13874	-1.29367	0.423775	-0.607398	2.2238	0.803696	0.573989	-0.588217	0.699999	0.983174	-1.19928	-1.29367	0.300629	-0.462041
PTGER3	-0.336504	-0.363378	-0.318462	-0.363378	0.499055	-0.24312	-0.0825925	-0.363378	-0.126151	-0.202107	3.65997	-0.363378	-0.306442	-0.363378	-0.363378	-0.363378
ZRANB2	0.169702	1.1135	-0.729406	-1.37699	0.10501	-0.0917379	1.05314	-0.977223	0.713398	-0.414717	0.985892	1.47202	-1.52149	-1.0697	1.22745	-0.658853
NEGR1	-0.44149	-0.44149	-0.394596	-0.44149	-0.388242	1.35377	3.34857	-0.398453	-0.361914	0.00311647	0.0728627	-0.44149	-0.369236	-0.21694	-0.44149	-0.44149
FPGT	-1.10529	-0.760071	2.07185	0.670369	-0.239943	0.694836	-0.615946	1.09191	-0.19748	1.40691	-0.605579	-0.624808	0.0710829	0.620407	-1.00426	-1.47399
CRYZ	1.42754	1.74168	-1.07749	-1.09688	-0.284641	-0.508879	1.03431	-0.578783	0.34957	-0.0830988	0.0658901	-0.132298	-1.09688	-1.09688	1.75676	-0.419903
TYW3	-0.011025	0.469617	-1.27554	-1.37085	1.43936	0.775417	1.37363	0.0682946	-0.0514741	0.304015	1.54273	-0.203537	-1.3325	-1.37085	0.307891	-0.665178
ACADM	0.0399035	-0.121486	-0.430694	-1.23054	1.3951	0.709537	1.01399	-0.793088	1.07213	-0.467702	1.82076	0.00914085	-1.49886	-1.3972	0.318649	-0.439637
RABGGTB	0.707463	0.659397	-1.54428	0.369032	0.861419	0.149883	0.11093	1.1772	0.971194	0.0519043	0.432936	0.131219	-2.05097	-1.63147	0.603324	-0.999183
ST6GALNAC3	-0.695718	-0.768291	1.29643	-0.784881	-0.771534	-0.204734	-0.594649	0.147068	-0.19632	0.262795	-0.775733	0.698649	2.47177	1.45649	-0.779144	-0.762201
PIGK	0.186819	0.461473	0.270632	-1.56948	-0.324082	1.68321	-0.0142226	-0.639717	-1.03971	0.0392592	0.686053	-0.134545	-0.586572	-1.37547	2.24693	0.109417
AC118549.1	0.717598	0.603463	-0.839385	-1.49067	0.562684	0.495233	0.770806	-0.591693	0.799172	-0.0385433	1.37161	0.747679	-1.41439	-1.60561	0.962315	-1.05027
USP33	0.00262819	1.13665	1.45187	-0.619622	-0.533054	-0.402263	-0.287804	-1.06238	-0.301739	0.0140015	0.621991	-0.192837	0.0331706	0.303986	2.03151	-2.19611
MIGA1	0.666212	1.25029	-0.0256232	-1.48245	-0.672467	-0.0674351	-0.11497	-0.0623775	1.02376	0.633769	0.133333	0.798272	-1.37905	-1.40763	1.78205	-1.07568
NEXN	-0.622579	-0.610909	-0.705492	-0.747247	0.699913	1.66229	-0.134459	-0.242407	-0.257382	0.146182	2.85604	-0.0946751	-0.679082	-0.747247	0.209343	-0.732292
FUBP1	0.602743	0.855597	-0.248963	-1.67607	0.926231	0.673962	0.13023	-0.58379	0.155147	-0.122145	1.23919	1.16224	-1.52171	-1.18535	0.944079	-1.35139
DNAJB4	0.558072	0.627709	-0.740411	3.35402	-0.0724594	-0.51762	-0.152965	-0.542294	-0.135107	-0.282946	-0.334182	0.0177648	-0.792687	-0.82436	0.351626	-0.51416
AC103591.3	0.200955	-0.296916	-0.908049	-0.894224	-0.54027	-0.0490186	0.574515	0.235819	3.08857	-0.0674084	0.601618	0.568216	-1.01171	-0.994364	0.0603626	-0.568088
IFI44L	0.702795	-0.15805	2.03581	-1.02728	-0.843416	-0.903916	1.29862	-0.0885305	0.478339	0.597285	-0.540056	1.60367	-0.925036	-0.621306	-0.612659	-0.996271
IFI44	0.749876	0.382119	-0.902479	-1.21124	-0.0710088	0.0550586	1.26013	1.42881	-0.733468	1.90208	0.297743	-0.14619	-1.09221	-1.21124	0.419337	-1.12733
LINC01781	-0.314629	-0.315373	-0.313642	-0.315373	-0.315373	-0.311955	-0.315373	-0.311429	3.68746	-0.313198	-0.310059	0.343268	-0.315373	-0.315373	-0.315373	0.0517973
TTLL7	-0.483289	-0.277508	-0.390986	-0.634628	-0.214254	-0.0946549	3.2512	-0.594192	-0.634628	0.332391	0.55172	-0.455686	-0.634628	-0.634628	-0.21665	1.13042
AL359504.2	-0.451946	0.0429625	-0.787235	-0.787235	1.00133	-0.594102	2.70701	-0.787235	0.138606	-0.549113	1.50956	0.411943	-0.787235	-0.787235	0.178767	-0.458838
PRKACB	0.251974	1.03651	-0.960635	-0.88894	0.00706608	-0.369879	1.30189	-0.677256	-0.21017	-0.365165	1.93177	-0.0762132	-0.987528	-0.95738	1.82124	-0.857277
RPF1	0.620134	0.984088	-0.917142	-1.14481	0.326023	0.785311	0.0292982	0.128556	0.143498	0.183321	1.60907	0.804404	-1.50843	-1.53422	0.908574	-1.41767
GNG5	-0.538766	-0.384985	-0.575819	-1.01441	0.574886	0.90158	-0.178555	3.24262	-0.591774	0.236516	-0.626158	-0.560514	0.346541	-0.0990504	-0.345546	-0.386562
CTBS	-0.414941	-0.345885	1.09929	-0.910971	-0.67613	-0.443072	-0.411094	-0.099196	-0.571174	0.124042	-0.695732	-0.229726	2.93628	1.41414	-0.252604	-0.52323
SSX2IP	-0.585302	-0.286742	-0.64722	0.767408	2.38933	-0.0219186	0.186536	-0.742202	-0.51816	-0.432422	2.25882	-0.4803	-0.672026	-0.765027	0.19023	-0.640997
MCOLN2	0.455168	2.4858	-0.65662	-0.683161	-0.656779	-0.175091	0.0373425	-0.683161	1.85866	-0.465374	-0.580972	1.17534	-0.683161	-0.683161	-0.0685369	-0.676299
C1orf52	0.905168	1.93151	-0.436984	-1.06069	0.143443	-0.497359	0.22966	-0.585359	0.2802	-0.193134	0.439357	0.888967	-1.27741	-0.868782	1.62865	-1.52724
BCL10	-0.653935	-0.202666	1.18224	-1.5597	-0.812534	0.16846	-0.640659	-0.151231	0.536177	0.380117	-0.529662	1.94554	1.83879	0.14907	-0.427019	-1.22299
ZNHIT6	0.409608	0.532134	-1.14549	-1.21575	0.369773	0.220588	0.389561	-0.590335	0.508367	-0.0773313	2.38382	0.637781	-1.20329	-1.21575	0.945123	-0.948813
COL24A1	-0.380091	-0.471667	-0.439161	-0.471667	-0.293135	0.957855	3.42618	-0.389904	-0.471667	0.443707	0.140924	-0.471667	-0.471667	-0.471667	-0.403364	-0.233004
ODF2L	2.43712	1.3878	-0.899299	-0.563245	-0.485304	-0.723757	-0.06786	-0.879813	0.468806	-0.660711	-0.145291	0.774911	-0.56545	-0.510616	1.33851	-0.905801
SH3GLB1	-0.528613	-0.364534	0.295478	-0.803349	-0.481399	-0.287795	-0.437699	-0.0365652	-0.58839	0.104757	-0.28776	-0.450701	3.32103	1.11325	0.0867546	-0.654466
SELENOF	0.194278	0.840094	-0.889161	-2.04884	-0.337187	0.245476	-0.257581	0.29391	1.25549	0.258244	0.286112	2.30553	-0.572053	-0.685271	0.150957	-1.03999
HS2ST1	0.285247	0.0802632	-1.22671	-1.63191	0.579962	0.201862	0.400317	-0.897438	0.01752	0.148352	2.01174	1.62213	0.0419582	-1.63191	0.133238	-0.134616
LMO4	-1.02194	-0.592177	0.279087	-1.91423	-1.21965	0.691276	-0.216064	-0.176789	0.138161	0.672858	0.118101	-1.12876	0.360301	1.80866	1.44406	0.757101
PKN2	-1.0854	-0.373008	1.18084	0.339179	-0.343274	-0.628549	-0.515983	-0.49597	-0.332853	0.242082	-0.389242	0.57414	2.49271	1.07849	0.0233156	-1.76647
GTF2B	0.278017	0.729243	-0.509977	3.28218	-0.177148	-0.614399	-0.147895	0.417602	-0.43564	-0.532252	-0.350618	-0.379069	-0.714368	-0.358393	0.548771	-1.03605
KYAT3	1.12495	0.81389	-0.563503	-2.07851	0.394351	0.439015	1.63188	-0.0400675	-0.0881713	0.036682	1.0614	0.352532	-1.30784	-1.01658	0.371238	-1.13127
RBMXL1	0.37735	0.513045	0.770779	-2.18625	-0.312782	0.4512	0.26185	-1.09231	-0.0432215	0.17298	0.599436	2.17609	0.374407	-0.104168	-0.498429	-1.45998
GBP3	0.626635	2.24683	-0.776249	-0.802145	-0.654136	-0.298681	0.00425603	-0.0879419	0.073144	-0.0319323	-0.440375	-0.301237	-0.752542	-0.802145	2.46359	-0.467069
GBP1	2.00571	2.16684	-0.742482	-0.770716	-0.722594	-0.404371	-0.409976	0.654482	-0.425357	0.195715	-0.665326	-0.770716	-0.126554	-0.64704	1.31725	-0.654864
GBP2	0.553894	1.02738	-0.72644	-0.867732	-0.858886	-0.621079	-0.334895	0.469533	-0.764194	0.366236	-0.794446	-0.77241	2.4408	0.230406	1.4947	-0.842854
GBP4	0.194941	0.910944	-0.862832	-0.785077	-0.818314	-0.538396	1.63598	-0.448366	0.197326	-0.0173822	-0.292811	0.512892	-0.819479	-0.546584	2.59494	-0.917783
GBP5	0.75133	2.22951	-0.483374	-0.573531	-0.565493	-0.42403	-0.378446	-0.202351	-0.367847	-0.326603	-0.520201	-0.355822	-0.474593	-0.474864	2.62945	-0.463136
LRRC8B	0.531378	0.157359	-0.670018	-1.18953	0.109708	0.390129	1.14264	-0.22798	-0.384286	0.283006	2.59408	0.922986	-0.775528	-1.18953	-0.999305	-0.695115
LRRC8C	1.52204	2.51418	-0.788603	-0.845498	-0.791765	0.525384	-0.473111	-0.168618	-0.517047	0.370345	-0.448176	-0.278465	-0.724317	-0.627633	1.36602	-0.634732
LRRC8D	0.378292	-0.446898	1.4875	-1.56077	-0.352713	1.69607	0.358443	1.16451	-0.577233	1.33962	0.266363	-0.479458	-1.05243	-0.873391	-0.276804	-1.0711
ZNF326	-0.660963	-0.373863	-0.75778	1.74717	0.918875	0.0171319	0.822431	-0.582532	-0.632262	-0.0943858	2.06162	0.451555	-1.4673	-0.757972	0.397982	-1.0897
ZNF644	0.441915	0.626814	-0.37528	-0.564898	-0.101776	0.00949791	0.371696	-1.05088	0.719773	-0.0227453	1.21542	1.64089	-1.56341	-1.5065	1.36115	-1.20168
CDC7	-0.233181	0.303926	-0.525941	-1.05529	1.82355	1.75397	0.246253	-0.793626	-0.666465	-0.159335	1.78581	-0.238339	-0.755695	-1.05529	0.447388	-0.87774
TGFBR3	0.0956721	1.66828	-0.398434	-0.416515	-0.415207	-0.390443	-0.408323	-0.416515	-0.405755	-0.0696501	-0.412719	-0.416515	-0.3914	-0.416515	3.19522	-0.401185
GLMN	0.75108	1.99495	-0.639761	-0.781158	0.105864	0.170315	0.0519256	-0.788867	-0.480685	-0.262235	0.335698	1.26377	-1.20684	-1.23815	1.68683	-0.962732
RPAP2	0.676221	1.36512	-0.641006	-0.674255	-0.468959	-0.150973	0.712249	-0.77016	-0.284829	-0.180776	0.401082	0.758898	-1.18697	-1.19463	2.46884	-0.82986
GFI1	0.108262	2.18903	1.4456	-0.734353	-0.715259	0.661729	0.00217082	-0.734353	-0.662181	-0.472735	-0.561377	-0.734353	-0.53351	-0.580648	1.89927	-0.577289
EVI5	-1.1427	-1.20452	1.31569	-1.08254	-0.152337	0.310593	-0.789365	1.20032	-0.0686677	1.89752	0.102966	-0.142678	-0.155573	1.38659	-1.23035	-0.244955
RPL5	0.746948	-0.0505709	-1.13838	-1.16313	1.3761	-0.103374	1.83965	-0.0162381	0.635861	-0.317863	1.19792	0.753948	-1.25827	-1.2421	-0.439884	-0.820618
DIPK1A	1.35989	1.45553	-0.756694	-0.813939	-0.699174	-0.621935	-0.527531	-0.621624	0.874989	-0.666207	-0.800223	0.315594	-0.813939	-0.813939	1.77241	1.3568
MTF2	-0.311791	0.130902	1.35144	-0.861341	0.498079	1.04031	0.932411	-0.877979	-0.0279613	-0.247355	1.64484	0.384129	-1.46405	-0.483609	0.285239	-1.99326
TMED5	-0.177019	0.111887	1.73642	-1.67184	-1.15971	0.0118447	-0.664808	0.23627	-0.444307	0.418626	-0.865025	-0.706025	1.14309	2.09115	0.00353186	-0.0640838
CCDC18	-0.602888	-0.0465205	-0.0367315	-1.60408	0.533312	2.10642	0.07202	-0.56711	0.113732	-0.139017	1.78853	0.743924	-0.622133	-0.930116	0.502939	-1.31228
CCDC18-AS1	0.952968	0.761948	-0.557453	-1.21545	-0.0218508	-0.939505	1.78166	-0.696	1.13493	-0.303027	0.201447	1.49073	-1.09111	-1.28352	0.474085	-0.689835
DR1	-0.189175	0.411395	2.66196	-0.907799	-0.481191	0.0825893	-0.657203	-0.326632	-0.549372	-0.16895	-0.0113508	-0.625672	0.7342	1.27708	0.478437	-1.72831
FNBP1L	-0.388262	-0.478467	-0.450714	3.52967	-0.0662003	-0.292234	0.532559	-0.441029	-0.195006	-0.118722	0.584336	-0.334062	-0.467521	-0.478467	-0.461109	-0.474772
DNTTIP2	0.246511	1.09187	-0.0924247	-1.69678	0.833285	0.323439	0.162089	-0.729026	0.0207514	-0.373807	1.43868	0.669758	-0.375706	-0.849731	1.3622	-2.03111
GCLM	-0.501536	-0.237487	2.18266	2.24395	0.872966	-0.596118	-0.600764	-0.817387	-0.679056	-0.598934	-0.465946	-0.690569	0.0980592	0.710002	-0.0754482	-0.844398
ARHGAP29	-0.591836	-0.617876	0.751214	-0.617876	-0.571068	-0.379215	-0.474152	0.880262	-0.617876	2.17775	-0.431118	-0.617876	0.0224401	2.32297	-0.617876	-0.617876
ABCD3	0.0436431	0.588292	1.00753	-0.985001	0.24313	1.45023	-0.194129	-0.374375	-0.149402	0.675694	0.752547	0.603188	-1.57501	-1.73878	1.12103	-1.46859
ALG14	-0.324566	-0.233291	-0.355261	-1.19375	0.838519	0.12324	-0.439742	0.569803	0.531808	-0.189952	-0.0538405	0.247032	-0.913158	-1.19375	-0.447942	3.03484
TMEM56	-0.537496	-0.537439	2.08744	2.40005	1.40219	-0.537682	-0.54397	-0.552845	-0.484535	-0.535938	-0.399482	-0.475454	-0.384231	-0.0273937	-0.509125	-0.364098
RWDD3	0.982725	0.815883	-1.08789	-0.733368	0.565303	-0.57895	0.738826	1.51485	0.54092	-0.774056	-0.815756	0.304063	-1.34315	-1.07616	1.71673	-0.769967
PTBP2	-0.611409	-0.533807	1.8832	-0.867804	-0.628424	-0.0799731	-0.356126	-0.402395	-0.585243	0.432798	-0.23123	-0.305842	1.17836	2.47154	-0.32968	-1.03396
DPYD	-0.412321	-0.222196	0.970309	-0.9104	-0.883944	-0.057831	-0.527498	0.527186	-0.870977	1.15694	-0.847857	-0.654219	1.95735	1.91752	-0.206929	-0.93514
AGL	-0.348314	-0.0105564	3.39298	-0.743281	-0.406589	-0.417864	-0.331722	-0.595962	-0.18382	-0.455797	-0.102976	0.164431	-0.312884	1.07348	-0.0295376	-0.691595
SLC35A3	-0.103519	0.358329	0.634142	-1.06995	-0.625751	0.409154	0.300682	-1.15454	0.180436	0.638435	1.44924	1.15745	-1.43374	-1.25734	1.6152	-1.09823
MFSD14A	1.63449	1.95901	-0.0809445	-1.38887	0.570292	-1.1008	0.23705	-0.853203	0.273805	-0.700221	-1.25994	0.705157	-0.440977	0.313744	0.866507	-0.735103
SASS6	-0.421445	-0.278607	-0.624022	-0.900354	1.62744	0.372325	-0.0411079	-0.688895	0.123616	-0.442163	1.76251	2.07364	-0.932481	-1.11613	0.199169	-0.713505
TRMT13	0.611234	0.692433	-0.994679	-0.935319	0.120177	0.109705	0.506375	-0.942512	1.32567	-0.316966	1.54961	1.28314	-1.2611	-1.38535	0.721736	-1.08416
DBT	0.0319573	0.597517	-0.680013	-0.673035	-0.236737	0.00580639	0.360878	-0.404635	0.172303	0.833316	1.92667	-0.0292201	-1.69435	-0.71282	1.89957	-1.39721
RTCA	-0.0306662	0.8962	0.112148	-1.28295	0.358615	0.167705	-0.226182	0.109947	-0.795081	0.111123	0.337228	2.8647	-1.05616	-0.820003	0.428565	-1.17519
CDC14A	2.62715	0.966106	1.08733	-1.14278	-0.638158	-0.241213	-0.307222	-1.11315	-0.402581	-0.307524	0.25156	-0.384396	0.559682	-0.396122	0.665025	-1.2237
EXTL2	-0.588646	-0.246823	-0.7543	-0.521262	1.28694	0.257759	1.32678	-0.439535	-0.367494	0.0631958	2.84068	-0.671234	-0.728409	-0.781353	-0.185017	-0.49127
SLC30A7	0.640758	1.16305	-0.0146727	-1.98605	-1.09566	0.243976	-0.281665	0.639106	-0.620804	1.64112	-0.00460981	-0.580525	-0.955015	0.126363	1.68521	-0.600584
DPH5	1.39268	0.633881	-1.06601	-1.56324	1.0459	0.382863	0.584733	-0.686427	-0.241131	0.417055	1.78505	0.15014	-1.0252	-1.04577	0.375039	-1.13957
AC093157.1	0.17995	-0.320944	-0.949431	-1.62788	0.332064	-0.362297	0.927446	-0.783747	0.387712	-0.674863	1.09565	2.51789	0.580439	-0.075501	-0.190998	-1.03548
S1PR1	2.01813	1.88396	-0.614226	-0.646585	-0.635724	-0.644654	-0.618184	-0.599174	0.0655277	-0.509495	-0.626447	0.262224	-0.198812	-0.507854	1.92236	-0.551042
RNPC3	0.0208026	0.581287	-0.323186	0.313773	-1.19253	-0.308837	0.210598	0.594217	0.0611126	0.539069	-0.893621	2.88731	-0.689896	-0.882965	0.389433	-1.30657
PRMT6	0.146896	0.164079	-1.03663	-0.95522	2.2307	-0.0197253	1.5303	-0.570119	0.490516	-0.247065	1.36115	-0.0678778	-1.08257	-1.08257	0.0417659	-0.903625
VAV3	-0.872439	0.719769	0.40476	-1.29887	-0.893282	-0.595499	0.512608	-0.779668	-0.369136	-0.235339	-0.358733	0.478328	0.979234	1.49169	2.1083	-1.29173
AL390036.1	-0.866334	-0.727752	0.490291	-0.880753	-0.875861	0.528518	-0.0949658	2.412	-0.316819	1.61307	-0.78814	0.315775	-0.118887	0.98972	-0.804013	-0.875854
SLC25A24	-0.55798	-0.409799	2.05521	-1.18948	-1.04923	0.997806	-0.556655	0.0851639	-0.000516483	0.770502	-0.694237	-0.00345674	0.656742	1.76138	-0.688775	-1.17666
FAM102B	-0.44671	0.0392404	3.22273	-1.23303	-0.589259	0.564164	-0.4241	-0.234966	-0.340724	0.272427	-0.0877489	-0.279085	-0.114337	0.233805	0.56866	-1.15107
HENMT1	-0.0803827	1.685	0.0219675	-1.20403	0.538038	-0.318448	1.415	-0.600924	-0.877037	-0.475701	0.997508	-0.836352	-0.39014	-0.750385	1.88034	-1.00446
PRPF38B	0.289626	1.30737	1.15218	-1.11491	-0.802023	-0.619531	-0.577078	-0.921412	0.149301	-0.368038	-0.185482	0.416274	0.658461	0.208303	2.14025	-1.73328
STXBP3	-0.488263	-0.167759	0.931162	0.762239	-0.843796	-0.461538	-0.39784	-0.597637	-0.547575	0.198502	-0.0254617	-0.872604	2.16351	1.96868	-0.150392	-1.47123
GPSM2	-0.560527	-0.708104	0.256919	-1.02626	0.163236	1.80857	1.81971	-1.01997	-0.457956	-0.179398	1.83927	0.182095	-0.742659	-0.319296	-0.00471226	-1.05092
CLCC1	-0.0868669	-0.160525	-0.987759	-1.33835	0.699299	0.522402	0.558506	-0.702974	1.07444	0.231866	2.24399	-0.484778	-1.30141	-1.26896	0.0833568	0.917749
WDR47	-0.104924	0.486681	2.24639	-1.78298	-1.11044	0.203313	0.129851	0.579712	-0.0877838	0.567192	0.0578797	-0.997553	0.642674	0.428937	0.415072	-1.67402
BX679664.3	2.31488	1.36311	-0.938568	-0.947282	0.412254	-0.523647	0.0647139	-0.473727	0.258671	0.157148	-0.814576	1.58624	-0.947282	-0.947282	-0.0512013	-0.513456
TAF13	-0.669063	-0.286357	2.87349	-0.839514	-0.444294	0.367049	-0.673839	-0.198079	-0.624348	0.348604	-0.419489	-0.767684	1.12398	1.23062	-0.278681	-0.742392
TMEM167B	-0.331133	-0.290884	2.0066	-0.692822	-0.802675	-0.134797	-0.530871	-0.101319	-0.767204	-0.00371227	-0.441291	-0.44899	2.07035	1.72133	-0.222549	-1.03003
KIAA1324	0.213149	0.0231765	-0.179755	-0.531534	-0.519786	-0.499162	-0.482995	-0.531534	-0.307582	-0.396146	-0.482195	-0.449016	3.35156	1.18849	0.113303	-0.509974
SARS	0.887011	0.829841	-0.971762	1.09533	1.08049	-0.393862	-0.854215	0.805088	-0.567053	-0.339722	0.83226	-0.0230856	-1.70394	-1.45448	1.44458	-0.666488
PSRC1	-0.672209	-0.359426	-0.155049	-0.906331	-0.411751	2.58898	-0.390763	0.840557	-0.691109	-0.0691282	-0.360367	-0.906331	-0.35148	1.35754	1.3212	-0.834341
SORT1	-0.557909	-0.552023	3.37266	-0.482862	-0.548353	0.0841764	-0.432813	0.251079	-0.558835	0.402977	-0.487157	-0.574554	0.538272	0.586019	-0.543645	-0.497032
PSMA5	0.600545	1.24733	-1.23412	-1.25301	1.28722	0.459123	0.234729	0.450182	-0.0924016	0.0278287	0.69052	-0.28372	-1.45521	-1.56114	1.52606	-0.643934
GNAI3	-0.506719	-0.272685	2.09089	-0.620531	-0.497594	-0.382803	-0.394648	-0.401292	-0.643011	-0.0163965	-0.425668	-0.395996	1.76429	1.95841	-0.0313999	-1.22485
AMPD2	-0.00444685	-0.361763	0.287415	-1.27707	0.652528	-0.071767	0.581686	2.78467	-0.371315	0.710625	0.606482	-0.676434	-0.312186	-1.46232	-0.131942	-0.95416
GSTM4	-0.0692185	1.11754	-1.12013	-1.28117	1.29725	0.13684	1.70783	-0.0472973	-0.454427	-0.351863	0.652785	-0.0316045	-1.28117	-1.28117	1.42042	-0.414632
GSTM2	-0.0507366	-0.426909	-0.249327	-0.766236	0.224585	-0.583714	2.93453	-0.55848	-0.464388	-0.234921	-0.40014	-0.593246	-0.340209	-0.270216	1.96128	-0.181875
GSTM1	-0.255742	-0.272023	-0.62074	-0.663613	1.84653	-0.326044	1.75177	2.34784	-0.309814	-0.394566	-0.401339	-0.540427	-0.663613	-0.663613	-0.372226	-0.462373
GSTM5	-0.380105	-0.3962	-0.389756	-0.3962	0.423834	-0.339487	3.52071	-0.38147	-0.353411	-0.199307	0.807569	-0.3962	-0.3962	-0.3962	-0.336447	-0.391127
GSTM3	-0.34486	-0.355975	-0.398649	-0.349617	3.38755	-0.37988	0.359018	-0.403379	-0.397477	-0.374928	1.22144	-0.398383	-0.400636	-0.398962	-0.376149	-0.389116
CSF1	-0.210993	-0.226132	-0.456358	-0.487794	2.10422	-0.47622	-0.0518136	-0.472785	-0.467548	0.243296	2.86046	-0.487794	-0.408561	-0.487794	-0.487794	-0.486398
AHCYL1	-0.452501	-0.413762	-0.0169778	-1.52485	0.869472	1.05684	0.115254	-0.0355141	-0.362462	0.763649	2.6958	-0.33108	-0.737388	0.00309219	-0.341405	-1.28816
STRIP1	0.801853	1.807	0.400051	-0.231244	0.0135132	-0.332209	0.110633	-0.848066	1.28969	-0.188918	-0.462455	-0.920094	-0.276228	-1.45439	1.73335	-1.44248
RBM15	-0.270102	0.711499	0.222579	-0.755192	0.487853	0.588734	-1.02263	-1.8338	0.23067	-0.477447	-0.138118	1.43317	0.331128	-0.056258	2.03331	-1.48539
LAMTOR5	-1.32184	-0.831599	1.07526	-0.086162	-0.274326	-0.334143	-0.12845	0.500489	0.299427	-0.149359	0.0807665	0.189222	2.08305	1.4329	-0.498407	-2.03683
AL365361.1	1.87694	1.81881	-0.746583	-0.79851	-0.74893	0.0880358	-0.429499	-0.63982	-0.00110853	-0.656517	-0.635957	1.86711	-0.77407	-0.79851	0.496402	0.0822071
KCNA3	2.21441	2.47269	-0.61331	-0.629732	-0.588778	-0.452179	-0.402418	-0.575164	-0.200391	-0.563997	-0.586027	0.0591816	-0.629732	-0.629732	0.693532	0.431652
CD53	0.0362971	0.759393	-0.0144251	-1.53588	-1.38038	-0.60024	-0.374228	-0.148084	0.670025	0.0487729	-1.03492	0.56576	1.81703	1.31503	1.11139	-1.23556
LRIF1	0.00450098	1.23096	-0.0373718	-1.57027	-0.499999	-0.371764	0.0625614	-1.12237	1.093	-0.883571	0.0149486	1.36711	-0.772668	0.537699	1.92041	-0.973183
DRAM2	-0.423191	-0.0821415	-0.684606	-0.527662	-0.588367	-0.338748	-0.180016	0.483421	2.14112	0.184881	-0.385448	2.63962	-0.872623	-0.672187	-0.0721428	-0.62191
CEPT1	-0.287196	0.0194358	0.599673	0.377471	-0.764481	-0.374615	-0.485894	-0.630808	1.93396	0.113884	-0.385554	2.50548	-0.747514	-0.947602	0.24091	-1.16715
AL355816.2	0.855873	0.939221	0.480507	-0.731935	-0.707573	-0.616907	-0.47791	-0.681506	-0.291688	-0.510993	-0.591457	0.0430664	-0.0815022	-0.0588118	3.13678	-0.705169
DENND2D	1.16273	1.73494	-0.0782206	-0.657954	-0.543887	-0.522205	-0.451265	-0.422328	-0.336135	-0.462901	-0.56378	-0.335018	-0.436385	-0.272594	2.80119	-0.616201
CHI3L2	-0.216019	0.0467953	-0.409591	-0.429701	-0.429701	-0.423698	-0.40221	-0.409426	0.882395	-0.384233	-0.42389	3.48799	-0.429701	-0.429701	0.348302	-0.377608
WDR77	0.255284	-0.00257414	-1.06836	-1.03076	1.81842	0.597446	0.515974	0.531494	0.222977	-0.331875	0.813998	1.44178	-1.52824	-1.56737	0.214556	-0.882759
ATP5PB	-0.120215	0.149358	-0.878201	-1.57178	1.42125	1.2188	0.642975	1.49693	-0.140307	0.503908	0.59789	-0.196338	-1.29808	-1.27489	0.569899	-1.12119
C1orf162	-0.611711	-0.723248	0.558532	-0.889834	-0.922615	0.240356	-0.726496	2.04532	-0.537083	1.46907	-0.871904	-0.370321	1.38614	1.09796	-0.216131	-0.928034
TMIGD3	-0.580009	-0.518168	-0.174465	-0.583375	-0.583375	0.0402374	-0.543373	2.87772	-0.568854	1.61567	-0.548916	-0.583375	0.777311	0.518874	-0.583375	-0.562536
RAP1A	-0.0849219	0.210878	0.421743	-0.958098	-0.341891	-0.351618	-0.859569	0.735717	-0.60029	0.374248	-0.910927	-0.547413	2.28017	1.93522	0.0223375	-1.32559
INKA2	-0.557429	-0.568716	0.750604	-0.614172	-0.0168533	-0.45908	-0.523252	-0.332414	-0.545746	-0.314414	-0.0754156	-0.43409	2.36826	2.44872	-0.573883	-0.55212
DDX20	0.188924	0.429211	-0.826731	-1.47201	0.898115	0.2816	0.245993	-0.497938	0.830709	-0.0566368	0.875306	2.2771	-1.33762	-1.15005	0.266786	-0.952755
CTTNBP2NL	-0.518003	-0.498879	-0.592981	-0.616919	-0.387291	-0.0503853	0.442011	2.67847	0.173611	2.13984	0.0371511	-0.37938	-0.616919	-0.616919	-0.616919	-0.576488
ST7L	0.848823	0.323731	1.47812	-2.31848	0.0778301	0.0895357	0.693466	-1.5092	0.467178	-0.191677	0.718518	0.129277	0.030748	0.0433833	0.713217	-1.59447
CAPZA1	-0.462063	-0.193915	1.41957	-1.05467	-0.709436	0.030677	-0.76131	-0.225994	-0.453715	0.143959	-0.427105	-0.327153	2.05319	2.17293	-0.21054	-0.994425
RHOC	-0.025438	1.12211	-0.781413	-0.793196	-0.637201	-0.346723	0.242574	1.0337	-0.441772	0.455467	-0.297972	-0.238503	-0.750095	-0.728049	2.93926	-0.752746
SLC16A1	-0.291212	-0.216961	-0.621268	3.46454	0.496147	-0.0617773	-0.119543	-0.459238	-0.52344	-0.285552	0.747261	-0.485966	-0.587019	-0.637105	-0.120952	-0.29791
SLC16A1-AS1	0.484665	1.60183	-1.16484	-1.29035	-0.630088	-0.320953	0.217365	-0.733919	2.3486	-0.182244	0.791483	0.653369	-1.02557	-0.60295	0.104223	-0.250624
LRIG2	0.359116	1.14596	-0.742322	-1.12716	0.0675322	-0.65578	0.133299	-0.0942966	-0.0310388	0.42913	1.28644	1.85594	-1.86029	0.0849052	0.613528	-1.46497
PHTF1	-0.624905	-0.119246	0.165205	-0.976301	-0.0347672	-0.342156	0.17034	-0.870541	-0.638478	-0.438301	0.600552	-0.699818	1.73025	2.79683	-0.0549771	-0.663684
RSBN1	0.147775	0.167226	1.15105	-0.550856	-0.709592	-0.74051	-0.415495	-0.872202	-0.11558	-0.765855	-0.258076	0.374142	2.54528	1.4427	0.00366194	-1.40367
PTPN22	-0.0929145	0.951867	2.41558	-0.923556	-0.857134	-0.397826	-0.698609	-0.797375	-0.483451	-0.373319	-0.591568	-0.242701	0.323596	1.58309	1.08481	-0.900489
BCL2L15	-0.284176	-0.342064	3.72091	-0.278777	-0.342903	-0.236594	-0.343012	-0.362638	-0.242478	-0.260839	-0.288029	-0.321951	0.0146054	0.0239042	-0.0893995	-0.366564
AP4B1	0.413643	1.52216	0.808155	-1.19837	-0.413862	0.159016	-0.148658	-0.39861	-0.846563	0.111112	-0.445825	-0.397321	-0.434243	-0.00439875	2.63184	-1.35808
DCLRE1B	-0.429071	-0.319437	-0.19214	1.5063	2.02114	0.462593	0.0219348	1.53208	-0.874511	0.475129	0.472386	-1.0891	-0.857242	-1.0891	-0.603635	-1.03732
HIPK1	-0.495947	-0.46698	1.50238	1.5087	-0.646374	-0.159112	-0.702967	-0.636544	-0.873473	-0.227406	-0.307991	-0.877737	1.25059	2.0428	0.188918	-1.09886
TRIM33	-0.401978	-0.0658644	1.97411	-0.46583	-0.284679	-0.451466	-0.502403	-0.879467	-0.616055	-0.265635	0.347216	-0.747775	1.77298	1.21195	1.00496	-1.63008
BCAS2	1.5875	1.94073	-0.720066	-1.74961	0.446818	-0.588049	0.138869	-0.264502	0.879517	-0.500151	0.329721	0.263912	-1.09481	-0.731978	0.91442	-0.852325
DENND2C	-0.208674	-0.175413	3.73811	-0.315169	-0.307155	-0.304803	-0.273961	-0.315169	-0.289461	-0.183964	-0.248722	-0.315169	-0.264569	-0.315169	-0.2072	-0.0135109
NRAS	-0.965596	-0.275962	1.93885	-1.21708	0.356651	0.973715	-0.686282	-0.16636	-0.34888	1.65554	1.42631	0.0421088	-0.981043	-0.312668	-0.41771	-1.02161
CSDE1	0.813478	0.0770031	-0.237802	-0.494795	0.318268	1.18852	0.782856	-0.378076	-0.134219	1.33191	1.19723	-0.277354	-1.14297	-0.077908	-0.310981	-2.65516
SIKE1	0.612229	1.32901	0.173319	-2.00681	0.498311	0.0596386	0.393631	-0.0815511	-0.266493	0.0267397	1.2029	0.272011	-1.25298	-1.49396	1.46094	-0.926933
TSPAN2	-0.477044	-0.421416	2.90041	-0.469448	-0.502543	-0.350989	-0.357395	-0.462272	-0.501785	-0.409469	-0.469333	-0.512314	1.15712	1.63797	-0.256432	-0.50506
VANGL1	-0.555916	0.066701	-0.70225	-0.715737	1.84274	-0.226416	0.637131	-0.67834	-0.715737	-0.229505	2.41106	-0.430598	-0.670913	-0.715737	1.23855	-0.555032
SLC22A15	-0.613108	-0.615134	1.87302	-0.528447	-0.609302	0.092781	-0.533611	-0.221694	-0.573335	0.0539191	-0.509177	-0.586983	2.38543	1.55777	-0.534976	-0.637148
ATP1A1	1.60837	1.09387	-1.46839	1.10945	0.500651	0.91412	-0.316074	0.520238	-0.246101	0.718992	0.173754	-0.881406	-1.43665	-1.44188	0.0678765	-0.91682
CD58	-0.537123	0.0574609	1.09476	0.262471	-0.17502	-0.540516	-0.468173	-0.266545	-0.906013	-0.16747	-0.732956	-0.979494	1.54927	2.6173	0.268826	-1.07678
CD2	1.62691	3.06993	-0.421672	-0.42635	-0.434422	-0.385248	-0.419881	-0.397609	-0.423357	-0.409024	-0.429727	-0.435092	-0.435092	-0.435092	0.784167	-0.428439
CD101	0.178314	1.85972	2.55849	-0.640915	-0.640915	0.0935588	-0.640915	0.341844	-0.640915	1.03952	-0.640915	-0.640915	-0.358671	-0.640915	-0.585454	-0.640915
TTF2	-0.397948	-0.146351	-0.662781	-0.927132	1.04514	2.23082	0.419359	-0.64816	-0.20598	0.206493	1.92974	-0.482626	-1.03094	-1.12054	0.382435	-0.591532
MAN1A2	1.14674	1.24189	0.201358	-2.38013	-1.17625	-0.0959675	1.11569	-0.842186	-0.321512	0.0812628	0.79257	0.150139	0.017436	-1.06621	1.09115	0.0440303
TENT5C	-0.224311	-0.0444706	-0.409949	3.46514	-0.195466	-0.446387	-0.41653	-0.4999	-0.249761	-0.479113	-0.289421	-0.192305	-0.482622	-0.437828	-0.206813	1.10973
GDAP2	-0.34889	-0.111651	2.5023	-1.71051	-0.857591	0.102336	-0.395465	0.671277	-0.393396	0.98842	-0.560536	1.03012	0.264474	0.000305291	0.134281	-1.31548
WDR3	0.198181	-0.0582577	-1.10315	-1.23388	1.20829	0.588536	0.568593	-0.385204	0.101371	-0.0315286	2.2385	1.10398	-1.20809	-1.23388	0.0886862	-0.842143
WARS2	0.699473	0.599703	-1.35062	-0.313787	0.711359	-0.245907	0.327514	-0.0900791	0.195402	-0.454693	0.66309	2.13953	-1.51364	-1.51364	0.992773	-0.846474
PHGDH	-0.539673	-0.622501	-0.639519	-0.612975	-0.326942	1.90731	2.0483	-0.391749	-0.645697	-0.411903	0.635404	-0.259501	-0.658302	-0.685175	-0.573016	1.77594
NOTCH2	-0.674353	-0.534838	-0.456717	-1.02905	-0.542884	-0.359559	-0.417054	0.448968	0.70362	0.768482	0.000564208	3.11034	0.480936	-0.00130726	-0.548281	-0.948871
SEC22B	-0.26258	0.970987	0.440464	-2.66772	-0.578004	-0.012399	0.101852	-0.77306	-0.301931	0.387708	0.141599	0.657408	1.81308	-0.0377365	0.994414	-0.874082
AC244669.1	-0.00813622	0.786381	-0.63933	-1.20908	-0.397401	-0.481198	0.163691	0.00100287	0.18972	-0.367014	0.509301	0.426479	-0.710042	-0.239626	3.10544	-1.13019
RF00003	-0.0347672	-0.120195	-0.522023	-0.596093	-0.391513	0.23704	0.187276	-0.506582	3.54997	-0.20349	0.179403	0.220333	-0.655651	-0.695337	-0.263576	-0.384795
NBPF26	-0.412652	-0.581604	-0.751066	-1.37016	0.309093	-0.00663344	0.451485	2.77364	-0.722502	0.547141	-0.179796	0.761506	0.736797	0.302134	-0.564775	-1.29261
RNVU1-19	0.555024	-0.109228	-0.510475	-0.608023	-0.577636	0.175156	-0.231462	-0.410188	3.32742	-0.167808	0.0243694	0.271626	-0.861038	-0.851981	0.628107	-0.653865
FCGR1B	-0.632466	-0.613654	0.0958729	-0.648237	-0.648237	-0.137867	-0.612438	0.667725	-0.648237	1.95493	-0.633804	-0.648237	2.25755	1.3287	-0.648237	-0.433359
SRGAP2C	-0.158818	0.438214	0.700101	0.354243	-0.759286	1.24821	-0.887989	1.12644	-0.812342	2.42942	-0.0696633	-0.690877	-0.453953	-1.18493	-0.137773	-1.14101
RNVU1-15	0.24706	0.076903	-0.791897	-0.778857	-0.632328	0.116081	-0.22457	-0.400516	2.99242	-0.356351	-0.145958	1.0269	-0.89347	-0.917579	1.06389	-0.381721
AC246785.3	1.05119	3.06872	-0.472273	-0.572369	-0.549901	-0.492967	-0.416304	-0.430129	0.0653493	-0.542198	-0.570852	1.08729	-0.572369	-0.572369	0.488147	-0.568974
NBPF15	2.31966	0.837857	-0.790067	-0.87845	-0.537271	-0.509066	0.110356	-0.515244	1.44991	-0.436541	-0.81176	1.4919	-0.71834	-0.87845	0.265584	-0.400083
RF00003-2	0.45085	-0.0418649	-0.648338	-0.679768	-0.453003	-0.381405	-0.226758	-0.553624	3.43869	-0.263834	-0.175166	0.0506965	-0.617719	-0.679768	0.137657	0.643356
SRGAP2B	-0.643328	-0.391333	0.776088	-0.863439	-0.730888	1.19727	-0.958004	1.44564	-0.0717468	2.34265	-0.533696	-0.482421	-0.815872	0.784508	-0.166449	-0.888988
LINC01145	0.739697	2.46518	-0.419147	-0.681211	-0.379988	-0.407187	-0.171215	0.108118	0.0304392	-0.476031	-0.531607	-0.681211	-0.54646	-0.681211	2.28501	-0.653185
AC241585.2	1.70449	1.58254	-0.778197	-0.8256	-0.667224	-0.635137	-0.394733	0.0287569	0.808603	-0.52969	-0.723153	1.8326	-0.6388	-0.8256	0.864406	-0.803253
AC245014.3	0.435381	0.40871	-0.670667	-0.957094	-0.631017	0.707285	-0.0550063	0.422341	3.06262	-0.220181	-0.342387	0.0206005	-1.02205	-1.01487	0.460648	-0.604315
RF00003-7	0.0339116	-0.00850205	-0.558493	-0.274187	-0.0868573	0.0771224	-0.415925	-0.751488	3.2274	-0.321642	0.251692	1.18908	-0.810104	-0.846142	-0.700983	-0.00488336
GPR89A	0.856959	1.99321	-0.982783	-0.423918	0.557404	-0.396706	0.0475374	-0.644165	-0.0539208	-0.548271	-0.0899421	0.867808	-1.23902	-1.28297	1.91836	-0.579588
CD160	0.274044	1.43329	-0.398641	-0.144655	-0.418426	-0.407009	-0.398588	-0.423372	-0.330761	-0.403296	-0.400093	-0.423372	-0.423372	-0.423372	3.29757	-0.409948
RNF115	0.304505	1.66934	-0.953296	0.415232	0.0336448	-0.25124	0.513622	-0.515229	-0.131969	-0.11249	0.283017	0.137231	-1.39032	-1.39343	2.35012	-0.958741
POLR3C	0.293659	0.525382	-1.25642	1.70027	0.919517	-0.0759159	0.473479	-0.258264	0.985447	-0.399735	0.0547919	0.578958	-1.53615	-1.73662	0.9015	-1.16989
NUDT17	-0.0156963	0.498782	-0.851641	-0.73857	-0.00775236	-0.265104	3.04402	-0.241202	0.375875	-0.0399291	-0.543889	0.827985	-1.0373	-1.0373	0.651823	-0.620107
PIAS3	0.406906	1.12603	-1.2789	-1.19785	-0.235507	-0.393982	2.19437	0.838511	-0.12171	-0.0813208	-0.254032	0.228888	-1.11238	-0.803383	1.46283	-0.778472
PEX11B	-0.163548	0.317502	-0.754101	-0.9494	0.0376231	-0.348101	0.181272	1.49146	0.380376	-0.603141	-0.34376	2.66866	-1.32938	-0.668739	0.768334	-0.685067
RBM8A	0.0576898	0.823044	-0.380831	-1.2648	0.845978	0.939161	0.155459	-0.0296507	0.0232914	-0.662285	0.769607	0.593248	-1.14511	-0.929962	2.02237	-1.81721
LIX1L	1.7604	1.80586	-0.545792	-1.59212	-0.365263	-0.431655	0.0809713	-0.284899	0.458676	-0.27627	-0.0826615	-0.962083	-0.304357	0.725995	1.3409	-1.32771
POLR3GL	0.52055	1.34774	-0.948869	-1.32905	0.0221077	-0.431608	0.276246	-0.0402479	0.224489	-0.634579	0.460675	0.988447	-0.547721	-1.06842	2.34425	-1.184
TXNIP	0.828343	0.678846	-0.845853	-1.02451	-1.07785	-0.993278	-0.800035	-0.175957	1.2226	0.048328	-0.784349	2.05123	0.703267	-0.00322965	1.19058	-1.01815
RNVU1-6	-0.0114491	-0.254894	-0.841556	-0.511596	-0.258181	0.436598	0.360651	-0.743981	3.11325	-0.331385	0.481031	0.907829	-1.16351	-0.63178	-0.637232	0.0862116
NBPF10	-0.579574	-0.26265	-0.855818	-1.50179	0.307001	-0.0683187	0.673249	2.38198	0.604506	1.01772	-0.308767	1.1767	-0.187664	-0.876079	-0.239916	-1.28058
NOTCH2NLA	-0.489674	-0.309115	-0.809764	-1.62565	-0.616417	-0.467502	0.214752	-0.0230863	1.25026	2.05921	0.474893	0.830196	-0.463309	1.29074	0.134948	-1.45048
RF00003-9	-0.212566	-0.307232	-0.680327	-0.814269	-0.123916	0.516525	0.408877	-0.409528	3.2486	0.165129	0.873925	-0.04901	-0.834738	-0.689226	-0.511674	-0.580571
NBPF12	0.643336	1.41168	0.102985	-1.38435	-0.638808	-0.756924	-0.246797	0.191848	0.845561	0.0175616	-0.351571	1.34861	-0.839966	-0.757404	1.87519	-1.46095
PRKAB2	0.204534	0.791461	0.338172	-1.6958	-0.331886	-0.410274	0.301114	-0.485332	0.50913	-0.114724	1.00028	2.55553	-1.13695	-0.798942	0.244544	-0.970849
FMO5	-0.654625	-0.481979	-0.497329	-0.843896	-0.538923	-0.210251	0.396487	0.323045	0.0885913	1.98698	0.32213	2.59924	-0.793803	-0.843896	-0.0634979	-0.788279
CHD1L	0.195779	0.0803952	-0.19315	-1.15652	2.81012	0.218805	1.27232	-0.826225	0.245453	-0.37587	0.148869	-0.193935	-1.15652	-0.922241	0.587444	-0.734733
ACP6	0.273633	-0.0607284	2.91079	-0.856875	-0.472535	-0.702003	0.0361534	-0.732194	-0.358547	-0.736249	-0.322896	-0.667874	0.461977	1.57904	0.309667	-0.661354
GPR89B	0.798652	2.16226	-0.872229	-1.06799	0.197295	-0.413959	0.411287	-0.816679	0.1998	-0.517396	-0.346851	0.254405	-1.01842	-0.678785	2.13664	-0.428034
NBPF11	0.785707	1.07984	-0.848752	-1.28317	-0.149458	-0.38903	0.0473315	-0.224788	1.10773	-0.178543	-0.467739	2.31194	-1.22012	-0.714004	1.01802	-0.874976
LINC01138	1.42689	2.18806	-0.596618	-0.746751	-0.57446	-0.56448	-0.272373	-0.519932	0.479418	-0.532442	-0.620589	0.350166	-0.583124	-0.711728	1.97789	-0.69993
AC245100.8	0.893329	1.02851	-0.699797	-0.812114	-0.724614	-0.5222	-0.393038	-0.159732	1.05864	-0.463998	-0.701092	2.17571	-0.775896	-0.751231	1.63421	-0.786688
RF00003-10	0.315584	0.248214	-0.110409	-1.09074	-0.827275	0.515708	0.0692294	-0.0130459	2.7856	-0.177332	0.147171	0.113456	-1.11878	-1.12893	1.20652	-0.934969
NBPF14	-0.782382	-0.722834	-0.630435	-1.36565	0.128971	0.00694321	0.55561	2.77444	0.685814	0.568469	0.0205623	-0.59586	0.5972	0.555008	-0.620571	-1.17529
PDE4DIP	0.938387	0.625089	-1.14333	-1.05497	-1.07795	-0.56458	0.50914	0.479971	0.511725	0.710363	-0.588695	1.70158	-1.29304	-1.41646	1.1982	0.464566
NBPF9	0.400582	-0.118325	-0.573268	-1.28063	-0.92312	-0.356899	-0.386053	0.49189	1.46627	0.960761	-0.012299	2.61494	-0.159179	-0.653254	-0.593003	-0.878411
AC245297.3	0.287174	0.89568	0.46659	-1.18201	-1.0578	-0.471617	-0.462482	-0.828655	-0.0585366	-0.349576	-0.320923	0.0106539	0.630915	0.879015	2.73524	-1.17367
AC242843.1	0.141897	0.238593	-0.0884788	-1.39323	-1.10028	-0.573462	-0.108671	-0.662556	-0.338722	1.69263	0.81504	-0.323919	0.490861	2.2725	0.264345	-1.32655
LINC00869	0.766673	2.24549	-0.210561	-0.799205	-0.634378	-0.209236	-0.317957	-0.60572	-0.342565	-0.362659	-0.561841	-0.0280746	-0.27034	-0.371677	2.51651	-0.814458
RF00003-11	0.130458	0.208785	-0.899129	-1.0778	-0.185996	1.5368	1.51732	2.01507	1.01871	-0.549546	-0.267907	-0.90405	-1.00427	-0.852655	-0.27008	-0.415722
FCGR1A	-0.489606	-0.489542	-0.254877	-0.501754	-0.500815	0.255194	-0.399118	3.1066	-0.491292	1.6135	-0.492261	-0.501754	0.423465	-0.325064	-0.46903	-0.483647
HIST2H2BF	-0.268335	-0.138944	-0.178385	-1.34153	0.0300538	0.435886	-0.290522	-0.962675	-0.476289	-0.761938	-0.193553	0.221445	2.10332	2.44661	0.121006	-0.746147
HIST2H2BD	-0.0641641	1.09148	-0.37901	-1.08319	-0.96366	0.101367	0.2151	-1.23795	0.430541	-0.662499	0.401813	2.78339	-0.101256	0.390556	0.190123	-1.11264
AC239868.1	-0.171482	0.639506	-0.121417	-1.50771	-0.855403	0.626772	-0.328627	-1.50465	-0.305873	-0.488364	0.509851	1.47793	1.06455	1.38182	0.989724	-1.40664
HIST2H2AA4	-0.167107	-0.0704216	0.217244	-1.44172	-0.288757	-0.348205	0.184784	-0.521518	-0.71621	-0.0888004	-0.467598	-0.406784	3.13365	1.09897	0.383539	-0.501069
HIST2H4B	-0.197325	-0.483977	-0.241847	-0.702971	1.79767	1.36146	-0.419299	-0.879334	-0.690624	-0.370835	2.3958	-0.879334	-0.480977	-0.507697	0.638779	-0.339484
HIST2H2BE	-0.30154	-0.373996	0.811583	-0.738294	-0.613451	-0.305742	-0.318729	-0.646708	-0.522271	-0.404525	-0.286191	-0.38951	1.5947	3.02859	-0.112341	-0.421582
HIST2H2AC	-0.400954	-0.790148	0.415646	-0.939613	0.578222	1.83392	-0.73045	-1.4295	-0.1958	-0.509949	1.91008	-0.791675	0.362486	1.13075	0.412112	-0.855136
HIST2H2AB	-0.486454	0.00813139	-0.544861	-0.796923	1.09548	2.57734	0.101368	-0.787169	0.0153393	-0.831554	1.18031	-0.648281	-0.239074	-1.06343	1.09796	-0.678196
BOLA1	0.702836	1.39913	-1.06702	-1.44239	0.59022	0.0246184	0.693384	-0.680219	-0.290776	-0.487757	0.97124	1.42369	-1.06347	-1.41113	1.16107	-0.523433
SV2A	0.111515	0.0689152	-0.497568	-0.603575	0.21582	-0.232524	2.98759	-0.603575	-0.603575	-0.218988	1.80104	-0.603575	-0.4604	-0.603575	-0.158741	-0.598783
SF3B4	0.0755446	1.01681	-0.56719	-1.44386	2.04324	0.358726	0.360068	1.07325	-0.240386	-0.352015	0.412156	-0.683287	-1.25039	-0.550128	1.14897	-1.40151
MTMR11	-0.491706	-0.491403	-0.502969	-0.522044	-0.50379	1.93257	-0.474598	2.27883	-0.522044	1.76141	-0.522044	-0.522044	-0.522044	-0.0239308	-0.370355	-0.503843
OTUD7B	0.361028	0.807883	-0.66203	2.45199	1.13849	-0.73201	-0.543476	-0.771056	-0.709832	-0.557662	0.248288	-0.771056	-0.711966	-0.771056	1.53991	-0.31745
VPS45	0.503149	1.15361	-1.26171	-1.3816	-0.140078	0.241794	0.365005	0.915859	0.683913	0.95949	0.369768	-0.337828	-1.3816	-1.3816	1.60469	-0.912852
PLEKHO1	0.0710537	0.0218338	-0.965222	-0.990328	-0.956335	0.0767877	0.0560083	0.883209	1.93302	1.36042	-0.814996	1.76704	-0.818153	-0.845072	0.00866447	-0.787934
ANP32E	-0.292097	-0.194055	0.377794	-0.764903	0.804139	3.05583	-0.463909	-0.885676	-0.177746	-0.509661	0.902859	-0.0959001	-0.954668	-0.372149	0.458444	-0.888304
APH1A	0.580453	1.0478	-0.912002	-1.95096	0.0224418	0.665837	1.15505	0.980622	1.03782	0.30243	-0.334666	0.530761	-1.19678	-1.12379	0.493628	-1.29864
MRPS21	0.475158	0.440165	-1.39852	-1.52603	1.1164	0.548389	1.02993	1.33304	-0.023282	0.0329714	0.595123	0.648779	-1.5239	-1.53369	0.360068	-0.574595
PRPF3	0.78401	1.08968	-0.0987176	-1.41216	0.162655	-0.103694	-0.0998549	-0.199634	0.498472	-0.154847	0.0845104	0.159655	-0.987289	-0.887736	2.62704	-1.46209
RPRD2	1.16215	0.315488	1.14829	-1.43373	-0.499302	-0.16245	-0.286142	-1.05708	1.21236	-0.321001	0.566468	0.380219	-0.553852	-0.594904	1.79295	-1.66945
TARS2	0.0766983	0.280026	-0.895372	-0.67271	0.70936	0.990703	0.644423	-0.684484	0.575878	-0.295559	0.585277	1.11233	-1.31398	-1.78207	1.77831	-1.10883
ADAMTSL4	-0.523808	-0.611146	-0.408391	-0.628839	-0.53684	0.305615	0.0763218	2.97566	-0.584291	1.69964	-0.481226	-0.628839	0.375276	0.0117567	-0.457204	-0.583694
ADAMTSL4-AS1	-0.452704	-0.486146	1.5992	-0.767689	-0.714243	-0.139496	-0.297233	-0.575116	-0.607844	-0.0436515	-0.242471	-0.767689	2.10139	2.1476	-0.120536	-0.633371
MCL1	-0.40289	-0.331084	1.65546	-0.78535	-0.777085	-0.10836	-0.265709	-0.258305	-0.615914	-0.0136505	-0.519852	-0.767974	2.21646	1.97681	-0.335084	-0.667467
ENSA	-0.151929	0.548382	-0.0724141	-1.43964	0.799985	0.511536	0.422731	-0.214268	0.124331	0.0692889	1.62517	1.05501	-1.36644	-1.42559	1.11339	-1.59955
GOLPH3L	0.175381	1.06158	-0.855123	0.0755757	1.32294	0.137941	1.35905	-1.05683	0.0931111	-0.787431	2.02656	-1.06509	-0.910359	-1.27428	-0.194419	-0.108599
CTSS	-0.722406	-0.680227	1.28081	-0.784291	-0.790753	-0.323045	-0.689793	0.845404	-0.499775	1.72118	-0.74857	-0.409585	1.46095	1.68949	-0.666735	-0.682657
ARNT	-0.793785	-0.414794	1.33627	-1.26912	-0.421585	0.907803	-0.394265	0.710606	-0.553444	0.825839	-0.396027	0.463767	0.417981	2.0175	-0.686778	-1.74997
SETDB1	0.0540275	0.497614	-0.0622661	-2.03447	0.174475	-0.0457227	1.32861	0.941874	0.740013	0.447199	0.385038	0.360027	-0.822184	-1.26463	1.12942	-1.82902
CERS2	0.0829975	0.67484	-0.770326	-1.70959	1.58869	-0.0156384	0.970331	-0.110946	-0.256264	0.277223	2.03016	-0.795832	-0.595806	-0.566455	0.505928	-1.30932
MINDY1	-0.456281	-0.692139	2.23884	-0.813239	-0.431134	-0.317359	-0.275475	-0.412967	-0.581524	-0.227499	-0.208985	-0.340072	1.61286	2.06835	-0.599269	-0.564105
PRUNE1	0.392875	0.481488	-0.435442	-0.866423	0.561646	-0.470877	-0.17605	-0.949689	0.370865	-0.704449	1.52766	2.50261	-0.496815	-1.11604	0.491648	-1.11301
C1orf56	0.214688	1.60253	-0.574651	-0.791492	-0.792805	-0.604406	-0.546086	-0.822908	0.115395	-0.248412	-0.529015	1.35936	-0.312643	0.134236	2.56067	-0.764453
CDC42SE1	0.288848	0.718577	0.360828	-1.20607	-1.04328	-0.623557	-0.909825	-0.371689	-0.211612	-0.361336	-0.83031	0.682314	1.33371	1.35283	2.00658	-1.186
MLLT11	0.0437943	0.111039	-0.289958	-1.04888	-0.0114563	-0.683482	0.424703	-0.714831	-0.420746	-0.494409	0.896952	0.0104978	0.729564	-0.819667	3.08834	-0.82146
GABPB2	0.0279018	1.27355	1.05795	-1.54249	0.464448	1.26758	-0.689345	-0.220971	0.317173	0.594841	-0.284931	-0.564495	-1.131	0.968472	0.510706	-2.0494
TNFAIP8L2	-0.30672	0.0663287	0.242417	-1.53238	-0.906208	0.429115	0.605664	1.84142	-1.07331	1.29182	-0.499068	-0.389891	0.43627	-0.120938	1.42422	-1.50874
SCNM1	-0.128704	0.170497	-0.287564	-1.54911	0.0912876	0.830709	0.540344	2.21645	0.0868571	0.464358	0.249262	-0.907791	-0.454199	-1.22584	1.32027	-1.41682
VPS72	0.55079	1.29445	-0.809535	-1.64181	1.57988	-0.214633	1.09335	-0.182029	0.586906	-0.601724	0.732217	-0.154402	-1.31313	-0.824532	1.00667	-1.10248
PIP5K1A	0.155159	0.676536	0.139042	-2.44882	-0.449406	0.851143	0.593974	-0.388518	-0.01788	-0.106683	0.744854	0.12797	-0.0266111	1.49751	0.617564	-1.96584
PSMD4	-0.607556	0.210908	-0.227237	-1.93571	0.765951	0.825799	0.458379	1.80748	-0.608105	0.492103	0.593868	-1.13062	-0.0434378	0.524347	0.638617	-1.76478
ZNF687	0.373511	0.336325	0.732473	-0.923274	-0.604909	-0.583924	-0.516255	-1.10346	-0.0555666	-0.354793	-0.657989	0.57644	0.641215	2.79037	0.640456	-1.29062
PI4KB	0.779205	0.939243	-0.543212	-0.632131	0.568714	0.0906132	0.936541	0.385888	0.918548	0.419831	-0.089933	-0.196973	-1.45695	-1.64459	1.41357	-1.88836
RFX5	-1.23739e-05	0.0652277	-0.924647	-0.816367	0.0801366	-0.149138	0.488632	-0.50488	1.46098	-0.207075	0.297042	2.81214	-0.984678	-1.02795	0.243003	-0.832421
AL391069.2	-0.514772	-0.602147	-0.688488	-0.738507	0.500023	1.07976	2.62842	-0.639253	0.134474	-0.139424	1.6731	-0.0636097	-0.738507	-0.738507	-0.466622	-0.685941
SELENBP1	-0.297624	-0.298871	-0.295357	3.68601	0.441661	-0.299631	-0.300371	-0.302268	-0.299086	-0.287544	-0.263882	-0.291061	-0.294647	-0.302268	-0.293711	-0.301352
PSMB4	-0.562683	-0.133446	-0.375983	-1.85573	0.031695	1.56626	-0.332616	0.752553	0.115482	1.31326	1.65296	0.618702	-1.28372	-0.265973	-0.0690856	-1.17167
POGZ	0.111766	0.150385	2.06619	-1.90052	-0.46975	0.42128	0.073102	-0.956333	0.10219	-0.242566	0.258229	0.735991	0.203089	1.29142	-0.00627286	-1.8382
SNX27	-0.50996	-0.492857	1.18463	-0.776799	-0.679536	-0.0583702	-0.566704	0.100562	-0.537949	0.391803	-0.592229	-0.611722	1.84316	2.52137	-0.479517	-0.735876
MRPL9	0.655802	1.0624	-1.24999	-1.4236	0.948362	0.249693	0.764344	-0.214088	0.936213	-0.448518	1.03951	0.342166	-1.41665	-1.47025	1.05868	-0.834083
THEM4	2.66214	1.51818	-0.798722	-0.740913	-0.0789694	-0.338715	0.825044	-0.610406	-0.436779	-0.476531	0.266986	-0.488138	-0.827206	-0.788006	0.919442	-0.607411
S100A10	0.0417827	0.221734	-0.640213	-0.640124	-0.622559	1.08971	-0.596083	2.53482	-0.449615	1.91794	-0.602149	-0.543062	-0.646706	-0.650945	0.184984	-0.599519
S100A11	-0.46845	-0.482616	0.298064	-0.637616	-0.64232	-0.16193	-0.598926	0.726042	-0.59818	0.55374	-0.634698	-0.634785	2.89376	1.50281	-0.51537	-0.59953
S100A9	-0.574766	-0.572217	2.08839	-0.566806	-0.580191	-0.116755	-0.580918	-0.18391	-0.573274	0.207348	-0.575943	-0.577188	1.57908	2.17838	-0.573984	-0.57725
S100A12	-0.510744	-0.502159	1.932	-0.512167	-0.514409	-0.400544	-0.514914	-0.281023	-0.510306	-0.149405	-0.512105	-0.512256	1.58351	2.42613	-0.510695	-0.510918
S100A8	-0.60888	-0.5996	2.29951	-0.606245	-0.612011	0.0422565	-0.612852	0.0768948	-0.607033	0.229033	-0.608653	-0.612684	1.52828	1.90291	-0.606939	-0.603978
S100A6	-0.664468	-0.627729	0.545613	-0.86483	-0.166647	0.28493	-0.777694	1.76469	-0.786911	1.06044	-0.598751	-0.830868	1.81094	1.413	-0.743636	-0.818079
S100A4	-0.405272	-0.37712	0.14427	-1.01048	-0.434655	0.506728	-0.740831	2.06363	-0.839839	1.4788	-0.497242	-0.918964	1.43092	1.08321	-0.524888	-0.958265
CHTOP	-0.237115	0.410981	0.522121	-0.567044	0.555079	1.16794	-0.460888	0.135627	-0.412816	0.122871	0.406324	1.90224	-1.43745	-0.822452	0.896737	-2.18215
SNAPIN	-0.183726	0.262735	-1.12238	-1.45848	1.09722	0.243019	1.03018	1.65281	0.396639	0.740793	0.425211	-0.15467	-1.19279	-1.59559	0.814065	-0.955037
ILF2	-0.185129	-0.082283	-0.878814	-1.05575	2.36526	0.891798	1.2399	0.0110911	-0.135197	-0.378139	1.37638	-0.532201	-1.13992	-1.14983	0.0755309	-0.422693
INTS3	-0.63882	-0.355575	0.952108	-2.2678	-0.284069	0.533386	0.108745	0.141146	-0.403896	0.338121	-0.148343	0.682515	0.719445	1.84639	0.523834	-1.74719
SLC27A3	-0.513711	0.606251	-0.161873	-0.944172	-0.705669	0.699397	-0.580106	1.46479	-0.495431	0.892571	-0.636972	-0.492839	-0.225143	-0.849677	2.6493	-0.706714
GATAD2B	0.322859	0.811151	0.401005	-1.0424	-0.976675	-0.568183	-0.0999536	-0.861968	-0.161954	-0.291353	-0.17598	-0.320275	1.07086	2.3023	1.24182	-1.65124
DENND4B	-0.354736	-0.173523	2.11104	-1.30179	-0.959678	0.394352	-0.799371	1.75032	-0.213501	0.438096	-0.684565	-0.32953	0.417377	0.500743	0.688168	-1.48341
CRTC2	1.10489	1.55822	-0.442012	-0.646132	-1.01633	-0.371732	-0.216008	0.435873	1.3276	-0.0490484	-1.26805	0.23715	-0.283224	-0.377575	1.68822	-1.68183
CREB3L4	-0.232238	0.0680024	-0.765171	-0.931714	1.28445	0.112391	2.3044	-0.74008	0.196539	-0.357524	1.55375	-0.931714	-0.869892	-0.931714	0.77794	-0.53741
JTB	-0.494799	0.090027	-0.125865	-1.03161	-0.610837	1.9777	-0.462529	-0.953123	0.010169	1.05853	1.90187	-0.0775039	-0.437704	-1.17337	1.13766	-0.808623
RAB13	-0.888285	-0.915152	-0.15618	-0.51591	1.30534	0.918171	1.95201	0.961288	-0.778891	0.857019	1.15215	-0.561698	-0.854632	-0.930233	-0.891173	-0.653828
RPS27	1.90478	0.882003	-1.09993	-1.10255	0.122613	-0.304521	0.440061	-0.115652	1.5811	-0.463184	0.327178	1.1685	-1.18342	-1.14307	-0.0348901	-0.979013
TPM3	-0.560408	-0.456625	1.8314	-1.1543	-0.714285	0.781918	-0.472622	0.14175	-0.611609	0.148168	-0.273862	-0.60131	1.53001	1.94833	-0.396861	-1.1397
C1orf43	0.0376893	-0.0647458	-1.28891	-0.858171	1.06233	0.111361	1.25054	1.77583	0.00580446	0.776376	0.92848	-0.36302	-1.27232	-1.74625	0.275504	-0.630489
UBAP2L	-0.313038	-0.2387	-0.170382	-1.22224	1.37111	1.33294	0.105932	0.216039	-0.151539	0.401529	2.10445	0.0303283	-0.894482	-0.91186	0.166003	-1.82609
HAX1	1.63481	0.966406	-1.32641	-1.36264	0.747959	-0.217925	0.478533	0.279048	-0.0586944	-0.614237	0.300613	0.818994	-1.60683	-1.45138	0.841355	0.5704
ATP8B2	2.3544	2.35425	-0.662202	-0.695716	-0.534328	-0.548193	0.127855	-0.601027	-0.191484	-0.450166	-0.12097	-0.373497	-0.677509	-0.695716	0.824364	-0.110061
IL6R	-0.230218	-0.639794	1.4944	-0.687106	-0.755048	0.720486	-0.406257	-0.217459	-0.707805	0.123769	-0.707998	-0.767084	2.01034	2.01884	-0.741854	-0.507215
UBE2Q1	0.424263	0.123183	1.56602	-2.19644	-1.07189	0.480792	-0.394489	-0.992871	0.050218	0.674432	0.937068	0.958405	-0.238508	0.371079	0.73117	-1.42244
ADAR	-0.0993958	0.158442	2.18304	-1.36371	-0.852686	-0.330294	-0.564261	-0.382141	-0.411901	-0.235515	-0.407796	-0.30843	1.7985	1.51933	0.265782	-0.968967
KCNN3	-0.250287	-0.277136	-0.250803	-0.277136	-0.266756	-0.26596	-0.014498	-0.277136	-0.277136	-0.199311	-0.277136	-0.277136	-0.277136	-0.277136	-0.277136	3.74184
PMVK	0.30683	0.297808	-1.30358	-1.45338	0.620011	0.603732	0.875267	1.98155	0.00406716	0.0812507	1.10915	-0.292762	-1.43172	-1.45338	-0.169656	0.224808
PBXIP1	2.31094	2.48003	-0.417645	-0.581677	-0.812102	-0.675243	0.330967	-0.583705	0.0344442	-0.48381	-0.509286	-0.282993	-0.527735	-0.0200571	0.389773	-0.651902
PYGO2	1.36459	1.6884	-0.893096	-1.49011	0.152632	0.0826478	-0.0694591	-0.237428	1.59971	-0.545069	-0.186222	0.879365	-1.28029	-0.791782	0.640918	-0.914803
SHC1	0.130273	1.11326	0.414614	-2.01482	-0.541159	1.05294	-1.28608	0.17359	-0.552416	2.2124	-0.415463	-0.00179307	-0.215616	0.77185	-0.250877	-0.590698
CKS1B	-0.421896	-0.575921	-0.628163	-0.763324	1.31513	2.30217	0.0212193	-0.414744	-0.273173	-0.538036	1.99548	-0.365907	-0.795134	-0.784962	0.502164	-0.57491
FLAD1	0.459569	1.21241	-1.0763	-1.55991	1.04954	0.345677	0.41094	0.382164	0.489048	-0.31675	0.149543	1.24295	-1.5486	-1.53473	1.00963	-0.715173
ZBTB7B	-0.0196856	-0.44957	1.51472	-0.753247	-0.96104	0.0289796	-0.915876	0.557906	-0.587093	0.132751	-0.933715	-0.242398	1.68352	2.19462	-0.363563	-0.886313
ADAM15	-0.524114	-0.65745	1.57252	-0.849495	-0.0954389	2.00732	-0.175451	1.58231	-0.791476	1.24612	-0.309978	-0.950627	-0.827244	-0.449501	-0.107682	-0.669817
SLC50A1	-0.122733	-0.111267	-1.10378	-1.24506	-0.122383	-0.208969	2.30211	0.0376273	0.358817	-0.407001	0.333066	1.22427	-1.36711	-1.25716	1.02276	0.666811
DPM3	-0.33791	0.59727	-1.31396	-1.38906	0.371909	1.70619	0.630023	0.97014	-0.449718	0.289376	0.40276	-0.166655	-1.60551	-1.38595	0.619112	1.06199
KRTCAP2	0.288771	0.775804	-1.26248	-1.21674	0.343033	0.5013	0.552163	0.838547	-0.109913	-0.324908	-0.262704	-0.27542	-1.25498	-1.30869	0.212629	2.5036
MUC1	-0.248854	-0.658259	-0.176593	-0.745576	2.56956	1.40406	0.701875	-0.537478	-0.745576	-0.0480442	1.43535	-0.745576	-0.253505	-0.745576	-0.745576	-0.460232
MTX1	-0.61392	-0.562569	2.12527	-1.79088	0.748327	0.627759	-0.558666	1.43397	-0.700772	0.384063	-0.141143	-1.00474	0.140637	0.846691	-0.00916144	-0.924875
GBA	0.0275743	0.930079	1.28873	-1.73144	-0.259646	-0.082144	-0.215639	2.11628	-1.00501	-0.388544	-1.33114	-0.392752	-0.633973	0.192317	1.09411	0.391196
FAM189B	-0.064482	-0.137762	-0.624104	-1.1663	1.6813	0.0877158	1.24132	0.354348	-0.221491	-0.0474162	2.33086	-0.371939	-1.1663	-0.974918	-0.030918	-0.889911
SCAMP3	0.969136	1.61965	-1.10308	-1.50223	0.320998	-0.0550248	0.59154	0.361205	0.19416	-0.238212	-0.206984	0.224849	-1.40955	-1.50223	1.71635	0.019411
CLK2	0.593772	1.03416	-0.0164958	-1.40188	-0.165243	0.423934	0.0618711	0.918253	0.726278	0.195975	-0.104492	-0.811372	-1.16918	-0.70795	2.13028	-1.70791
PKLR	-0.332537	-0.321645	-0.335536	-0.231228	3.62447	-0.336973	-0.313074	-0.337577	-0.249912	-0.311536	0.710024	-0.257128	-0.321708	-0.337577	-0.337577	-0.310492
FDPS	-0.35676	0.507264	-0.61203	-1.75069	1.92675	1.30311	0.247968	-0.294696	-0.527015	-0.187807	1.37842	-0.57261	-1.14025	-0.934754	0.94761	0.0655048
RUSC1	0.334187	0.971954	-0.876907	-0.888794	1.51391	1.06585	1.14382	0.560634	-0.346885	0.100357	0.0805885	-0.994515	-1.46152	-1.46152	1.10475	-0.845909
ASH1L	0.149638	0.626763	0.920308	0.540982	-1.0476	-0.7694	-0.412518	-1.85883	0.454433	-0.265869	-0.292127	1.49821	0.327252	1.05392	0.929781	-1.85493
MSTO1	0.408272	0.617923	-1.61479	-0.125962	0.880478	0.238046	1.451	-0.311411	-0.608715	-0.915668	1.17961	0.482859	-1.38888	-1.72487	0.83958	0.592531
YY1AP1	-0.129868	1.20997	-0.292967	-0.964966	1.24013	0.645268	0.239359	-0.425514	0.599025	-0.187949	-0.379208	-0.312953	1.4012	-0.753868	0.693284	-2.58094
DAP3	1.18361	0.661387	-0.875882	-1.52708	1.97331	0.0524991	0.258608	0.58263	0.114807	0.123392	0.627374	-0.396952	-1.37604	-1.37983	0.82041	-0.842246
GON4L	0.782797	1.35716	0.0264174	-1.51683	-0.518679	-0.422368	-0.127315	-0.616389	0.722671	-0.234886	-0.324391	0.234259	-0.986707	0.48016	2.41652	-1.27242
SYT11	0.0106082	2.57651	-0.67104	-0.854285	-0.634718	0.0563738	0.94717	-0.236087	-0.548433	0.102876	-0.0035475	-0.854285	-0.356184	-0.578966	1.89573	-0.851724
RIT1	-0.532185	-0.392252	1.10927	-0.420654	-0.686692	-0.317581	-0.525962	-0.228611	-0.528314	0.128125	-0.554759	-0.63658	2.43826	2.15168	-0.212862	-0.790884
KHDC4	0.404633	1.17457	-0.361784	-1.54758	-0.13611	-0.603044	0.413109	-0.78997	1.42269	-0.300604	0.63654	1.15679	-0.815398	-1.18583	1.62312	-1.09113
ARHGEF2	-0.905442	-0.489915	1.12084	0.665866	-0.817269	0.0388929	-0.162537	0.427903	-0.581159	0.0186973	-0.53616	-0.421595	1.88357	1.82449	-0.153552	-1.91262
SSR2	1.46763	1.59424	-1.35094	-1.8173	-0.342815	-0.0996889	0.815563	0.0648619	0.21908	-0.196684	0.00110016	0.367096	-1.12294	-1.14319	1.21852	0.32546
UBQLN4	0.808234	0.83759	-1.52339	-1.70307	1.21837	0.26352	1.33238	-0.239894	0.570589	0.00571246	0.871195	-0.0685575	-1.82402	0.0312719	0.185373	-0.765313
LAMTOR2	-0.497871	-0.207733	-0.355092	-1.22264	-0.0506574	1.56562	-0.0879176	2.56355	-0.422265	1.35745	0.264769	-0.423325	-0.762643	-0.81941	-0.201141	-0.700696
LMNA	-0.320979	-0.380115	-0.703483	-0.694866	2.90901	0.035614	-0.429694	1.31908	-0.550448	0.737358	0.881515	-0.712249	-0.687799	-0.738437	-0.422721	-0.241783
SEMA4A	-0.631974	-0.577039	1.8058	-0.65826	-0.648013	-0.0953396	-0.534665	-0.0609691	-0.589961	-0.0196603	-0.578632	-0.543037	2.20861	1.87216	-0.621842	-0.327178
SLC25A44	-0.497739	-0.330932	1.33468	-0.654887	-0.613908	-0.0816693	-0.605537	-0.33591	-0.460369	-0.194339	-0.570366	-0.45281	2.18916	2.31159	-0.277766	-0.75919
PMF1	-0.31514	-0.00373032	-0.647235	-1.73845	-0.382916	1.01951	0.95698	-0.448753	0.111267	1.26329	2.22044	-0.0341571	-0.369954	-1.06077	0.486738	-1.05712
SMG5	-0.302801	0.113171	1.23933	-1.59653	-0.117128	1.4348	-0.267693	1.5183	-0.250351	0.15697	-0.910455	-1.20562	1.4539	-0.355195	0.362263	-1.27295
GLMP	-0.5061	-0.404654	0.543939	-1.34572	-0.199899	-0.312369	0.817165	2.64324	-1.13482	1.23048	-0.592731	-0.989416	0.314812	0.525567	-0.298675	-0.290823
CCT3	0.123782	0.0880668	-1.21624	-1.11852	1.99225	0.162143	1.03514	0.0919581	0.326027	-0.181754	1.79986	0.107936	-1.31491	-1.19149	0.0861513	-0.790388
MEF2D	-0.248719	1.01487	-0.0154482	-1.62304	-1.64421	0.776005	0.285636	-0.132408	-0.199617	0.262716	-0.942182	-0.607247	1.08343	0.0710815	2.27926	-0.360135
IQGAP3	-0.45149	-0.45149	-0.0811457	-0.45149	0.706023	3.53628	-0.121159	-0.45149	-0.344482	-0.169439	0.356436	-0.45149	-0.45149	-0.45149	-0.280411	-0.441669
NAXE	0.103038	0.414354	-1.48319	-1.42438	1.39847	0.465082	0.46285	0.720059	0.547794	-0.262344	0.875993	-0.50945	-1.56269	-1.41406	0.357269	1.3112
GPATCH4	0.262118	-0.285806	-1.13444	-0.997937	1.56622	0.66258	0.391166	-0.385652	0.720981	-0.347816	2.2107	0.708469	-1.1891	-1.1891	-0.389641	-0.602762
ISG20L2	1.04209	1.74208	0.119832	-1.44556	0.321887	0.463984	0.210767	-0.982043	-0.0105253	-0.379179	0.158868	-0.432029	0.0658365	-1.17262	1.83181	-1.5352
RRNAD1	-0.127658	0.597908	-0.985395	-1.24556	0.234216	-0.00980511	0.352633	2.3189	1.05629	0.163598	0.334536	-0.465584	-1.23203	-1.34526	1.09476	-0.741535
MRPL24	0.238802	-0.0728405	-1.22029	-1.22561	1.89217	0.801973	0.830784	1.20742	0.312877	0.104451	1.01622	-1.00932	-1.27041	-1.32502	-0.0880975	-0.193099
HDGF	-0.42774	-0.515417	-0.217737	2.16456	1.64073	1.44328	0.0117505	-0.226674	-0.761547	-0.0765006	0.938061	-0.763151	-0.966675	-0.984282	-0.276795	-0.981859
PRCC	0.227512	0.938066	-0.780453	-0.857602	0.75903	0.554758	0.415391	0.82967	-0.314212	0.13614	0.245976	-0.322466	-1.80742	-1.26639	2.21087	-0.968875
SH2D2A	0.435387	2.35056	-0.427859	-0.431802	-0.39704	-0.42233	-0.416441	-0.412033	-0.423869	-0.417048	-0.397684	-0.431802	-0.425033	-0.431802	2.648	-0.399207
ARHGEF11	-0.525185	-0.722832	0.556339	-0.771613	-0.593721	0.0816802	-0.413181	0.380757	-0.736765	1.09582	-0.363872	-0.771613	2.19053	2.06592	-0.747968	-0.724292
ETV3	0.508505	2.52844	0.299727	-1.18218	-0.359876	-0.170797	-0.321947	-0.0583131	-1.03526	0.568459	-0.336691	0.134013	-0.317293	-0.155595	1.52087	-1.62207
AL138900.2	-0.273432	-0.274892	-0.272808	3.74024	0.0101886	-0.274892	-0.27199	-0.274892	-0.274892	-0.263024	-0.19514	-0.274892	-0.274892	-0.274892	-0.274892	-0.274892
FCRL5	-0.457812	-0.453361	-0.438682	-0.46436	-0.457749	-0.460941	-0.444287	-0.44807	1.19143	-0.397227	-0.461233	2.22983	-0.457946	-0.46436	-0.456664	2.44143
FCRL3	-0.282024	1.07282	-0.516575	-0.516575	-0.516575	-0.516575	-0.513662	-0.516575	1.06625	-0.490217	-0.515926	0.72828	-0.516575	-0.516575	3.03755	-0.487054
FCRL2	-0.482898	-0.500554	-0.0693213	-0.500554	-0.500554	-0.496764	-0.484906	-0.500554	1.97749	-0.443617	-0.486162	2.95105	-0.0417445	0.0535412	-0.470021	-0.00443628
FCRL1	-0.567254	-0.545172	0.370035	-0.569042	-0.568638	-0.566405	-0.563053	-0.569042	1.02454	-0.548415	-0.566597	2.80961	0.50219	1.47925	-0.566175	-0.555833
CD1D	-0.589547	-0.573094	-0.517135	-0.600108	-0.579261	1.67696	-0.577237	2.17298	0.187924	2.04793	-0.587266	-0.339347	-0.373408	-0.48422	-0.600108	-0.265065
CD1C	-0.525059	-0.52807	-0.496249	-0.52807	-0.524735	2.34467	-0.52807	0.808599	2.41083	-0.0756041	-0.527236	0.232331	-0.495366	-0.52807	-0.52807	-0.511823
OR10Z1	-0.307046	-0.307046	-0.307046	3.70836	0.272003	-0.297041	-0.307046	-0.307046	-0.307046	-0.277255	-0.0976084	-0.307046	-0.307046	-0.307046	-0.238002	-0.307046
SPTA1	-0.291877	-0.295953	-0.291275	3.71556	0.239571	-0.29475	-0.289054	-0.294601	-0.292069	-0.286583	-0.147031	-0.295953	-0.295953	-0.292924	-0.291459	-0.295648
MNDA	-0.611287	-0.609603	1.92944	-0.601071	-0.617832	0.0405737	-0.613004	-0.103893	-0.579736	0.338079	-0.611444	-0.597593	1.98304	1.88028	-0.611686	-0.614264
PYHIN1	0.119665	1.7047	-0.406263	-0.394047	-0.407874	-0.395709	-0.399819	-0.396655	-0.208739	-0.400418	-0.406064	-0.360062	-0.411223	-0.411223	3.18072	-0.40698
IFI16	-0.48621	0.369137	-0.247456	-1.59218	-1.40992	-0.114491	-0.374139	-0.0942088	0.620931	0.446548	-0.607332	0.549571	2.05812	0.632541	1.53139	-1.2823
AIM2	-0.44775	-0.432634	-0.34138	-0.514008	-0.491088	-0.465221	-0.514008	-0.421402	3.21601	-0.46675	-0.489406	-0.0511995	1.32673	0.713052	-0.494962	-0.125985
ACKR1	-0.385523	-0.355786	-0.380762	3.33013	1.47969	-0.363164	-0.377854	-0.389193	-0.389193	-0.271324	-0.1406	-0.389193	-0.389193	-0.26241	-0.328627	-0.386996
FCER1A	-0.497174	-0.487742	-0.497102	-0.50168	0.666985	0.499063	2.02474	-0.452639	-0.50168	-0.454376	2.70331	-0.50168	-0.494985	-0.50168	-0.50168	-0.50168
DUSP23	-0.67658	0.163096	-0.674069	-1.50883	0.493126	0.993739	0.669516	1.78434	-0.713123	0.600979	1.71647	-0.659845	-1.12247	-0.172946	0.253853	-1.14726
FCRL6	-0.231084	2.43171	-0.387638	-0.301414	-0.386768	-0.369009	-0.38844	-0.353577	-0.38014	-0.376044	-0.387654	-0.38844	-0.38844	-0.38844	2.68187	-0.386485
TAGLN2	-0.513837	-0.500361	-1.12932	-1.69249	1.59383	1.62924	0.744564	0.819409	0.0767035	-0.0656663	1.15361	0.121729	-0.11427	-0.313477	-0.264278	-1.54538
LINC01133	-0.386155	-0.338969	-0.137342	-0.414278	3.65808	-0.314202	-0.339909	-0.234387	-0.388827	-0.306157	0.126241	-0.222362	-0.34868	0.411548	-0.358232	-0.406371
PIGM	-0.0183518	-0.348021	-0.931747	-1.20827	1.31384	0.882571	1.35578	-0.298055	-0.309551	0.695163	2.14271	-0.309425	-1.16385	-1.03369	-0.126117	-0.642976
IGSF8	1.31305	1.77432	-0.981025	-1.02311	-0.450388	-0.634396	0.530232	-0.836891	0.836093	-0.556897	-0.436923	1.61327	-0.93553	-1.02311	0.894443	-0.0831376
PEA15	-0.28753	-0.0108944	-1.17752	-1.21084	-0.339765	0.566746	0.463353	1.12561	2.49642	0.751558	0.121535	0.181501	-1.11021	-1.08717	0.379258	-0.862054
DCAF8	-0.136933	0.100589	-0.379216	3.6559	-0.114268	-0.43175	-0.157093	-0.33759	-0.305906	-0.218107	-0.333534	0.00530734	-0.684293	-0.2321	0.142401	-0.573405
PEX19	0.242832	1.4419	-0.817997	0.338826	0.280243	0.582022	0.192048	-0.026212	-0.161735	0.471888	0.161279	1.05053	-1.32044	-2.08692	1.25508	-1.60333
COPA	-0.733997	-0.158718	0.993146	-1.65008	-0.680056	1.17873	-0.95457	0.429939	-0.675811	1.63061	0.0936396	-0.780895	0.674196	1.62808	-0.0252024	-0.969015
NCSTN	-0.869899	-0.252965	0.756285	-1.50192	-0.546071	-0.100632	-0.0226152	0.0818384	-0.678483	1.17031	-0.63012	-0.560497	2.63236	1.00542	0.226475	-0.709484
SLAMF6	1.28215	2.62821	-0.573253	-0.590801	-0.577495	-0.576783	-0.543962	-0.46698	0.166466	-0.581872	-0.549637	0.323087	-0.590801	-0.590801	1.70477	-0.462292
CD84	0.693722	1.758	-0.965711	-0.947032	-0.445137	0.692102	0.352966	-0.109896	-0.283808	0.56329	2.25311	-0.0799176	-1.00214	-1.04907	-0.418457	-1.01203
SLAMF1	3.06435	1.17678	-0.5362	-0.573608	-0.567796	-0.521742	-0.562427	-0.477077	0.357596	-0.494434	-0.573608	0.98953	-0.530994	-0.403875	-0.55025	0.203758
CD48	1.94401	1.48052	-0.797665	-0.937638	-0.946352	-0.329729	-0.840699	0.46747	1.13242	0.602099	-0.92146	0.788594	-0.784894	-0.829497	0.749117	-0.776305
SLAMF7	-0.210367	1.79973	-0.490358	-0.511906	-0.503225	-0.430756	-0.496818	-0.482787	-0.444072	-0.442232	-0.503172	-0.469456	-0.511906	-0.511906	2.25674	1.95249
LY9	0.959192	2.15384	-0.748311	0.315964	-0.659185	-0.747733	-0.69576	-0.746015	1.72515	-0.699512	-0.735643	1.1088	-0.758886	-0.771188	0.533945	-0.234656
CD244	-0.349457	1.23534	-0.509312	-0.472131	-0.503139	-0.186553	0.436406	0.0706772	-0.539592	0.0617176	-0.394441	-0.539592	-0.539592	-0.539592	3.28564	-0.51638
F11R	-0.37446	-0.676214	1.62758	-0.52118	-0.465276	-0.0155247	0.141494	-0.167506	-1.00567	0.187072	-0.518276	-0.99026	1.61155	2.32732	-0.237977	-0.922669
TSTD1	0.716057	0.93262	-0.535562	-1.28741	-0.260016	-0.942493	0.520979	-0.948516	1.11671	-1.09024	-0.0235821	2.46796	-0.450825	-0.371605	0.654886	-0.498961
USF1	-0.377217	0.265162	-0.789073	-1.54201	-0.768434	0.122415	-0.402489	2.53954	1.15064	0.517962	-1.18508	0.505486	-0.332982	-0.0304146	0.922506	-0.59601
ARHGAP30	0.0138714	0.485335	1.36701	-1.26841	-1.21209	-0.155258	-0.774901	0.166636	-0.250282	-0.000245369	-1.00055	-0.377456	1.28573	2.07932	0.799918	-1.15862
PFDN2	-0.165544	0.3082	-1.54002	-0.452533	0.95301	0.877899	0.79691	0.869525	0.326063	0.141425	1.5682	0.202416	-1.63136	-1.65675	0.415391	-1.01283
NIT1	0.450907	0.939003	-0.333687	-1.8624	0.0485906	-0.534144	0.301625	2.45397	-0.275533	-0.335088	-0.458609	0.799206	-0.595527	-0.0885335	0.841647	-1.35143
DEDD	0.0595378	0.668145	-0.231456	-1.69161	-0.278187	-0.873315	0.0426568	0.904564	0.130363	-0.4691	-0.634769	-0.0362886	0.748379	2.48539	0.65005	-1.47435
UFC1	0.405812	1.03853	-1.23712	-1.45024	0.607068	0.481965	1.67336	0.231441	-0.000123475	0.129633	0.954631	0.0598872	-1.5616	-1.60994	0.716315	-0.43961
USP21	0.68451	1.49513	-0.793835	0.369346	1.11715	-0.260596	-0.312644	-0.276064	-0.419523	-0.641028	0.214343	0.737799	-1.24463	-1.6709	1.91828	-0.917342
PPOX	-0.238047	-0.124347	-0.633765	3.19928	1.5451	-0.471736	-0.13069	-0.40361	-0.344778	-0.489827	0.18163	-0.517359	-0.641333	-0.523504	-0.0120451	-0.394968
B4GALT3	0.539927	2.06636	-1.01017	0.0528235	0.462885	-0.289607	-0.0982051	0.0879083	-0.524465	-0.591504	-0.226027	-0.535289	-1.4762	-1.33977	1.36282	1.51852
NDUFS2	-0.38838	0.132244	-0.740414	-0.231165	1.58866	0.692745	0.71874	1.05857	-0.734738	0.591804	0.792364	-0.684113	-1.62913	-1.05568	1.32781	-1.4393
FCER1G	-0.751727	-0.751713	0.365798	-0.750378	-0.745082	-0.237812	-0.710463	2.24506	-0.753596	1.10965	-0.725335	-0.753533	1.3986	0.887535	0.912413	-0.739421
SDHC	-0.123796	0.890161	-0.118328	-2.59086	1.65732	0.230583	0.449472	1.00506	-0.130007	0.617716	0.384251	-0.363864	-0.863077	-0.185101	0.472067	-1.33159
FCGR2A	-0.498302	-0.495013	0.143917	-0.502117	-0.453346	-0.43174	-0.496652	0.128256	-0.456576	0.188597	-0.370385	-0.49871	3.18983	1.5188	-0.4821	-0.484455
HSPA6	0.414075	1.2743	-0.361422	-0.877888	-0.79433	-0.704036	-0.751889	0.255656	-0.814191	0.253348	-0.809191	-0.877888	2.33861	0.887876	1.2773	-0.710332
FCGR3A	-0.60883	0.0707001	-0.445345	-0.62136	-0.617426	-0.619235	-0.615899	1.28346	-0.616456	0.855814	-0.62136	-0.62136	0.701345	0.163567	2.91287	-0.600486
FCGR3B	-0.401041	-0.395606	0.230195	-0.404342	-0.402816	-0.402022	-0.404342	-0.384949	-0.402698	-0.396829	-0.402937	-0.404342	3.01043	1.95188	-0.387419	-0.403157
FCGR2B	-0.57105	-0.448573	-0.561957	-0.580413	-0.574917	-0.241368	-0.544873	-0.151528	2.76266	-0.201629	-0.559804	1.97252	-0.492475	-0.580413	-0.034627	0.808442
FCRLA	-0.376349	-0.37696	-0.37696	-0.37696	-0.375568	-0.375592	-0.340157	-0.37696	2.86626	-0.372441	-0.372222	2.21784	-0.37696	-0.37696	-0.37696	-0.233051
DUSP12	0.484996	1.70962	-1.33767	-1.53865	0.606633	-0.00245534	0.866887	0.530955	-0.0289678	-0.3064	0.332805	0.836861	-1.40866	-1.34171	1.13929	-0.54354
ATF6	-0.519194	-0.30385	-0.0127672	-1.05778	-0.628741	0.181409	-0.278167	0.672124	-0.711833	1.06034	0.157452	-0.622875	2.34517	1.70055	-0.705935	-1.2759
OLFML2B	-0.393691	-0.428833	-0.422482	-0.197764	-0.055396	-0.387675	-0.188653	2.92564	-0.428833	2.10787	-0.390989	-0.428833	-0.428833	-0.428833	-0.428833	-0.42387
SH2D1B	-0.254745	-0.222765	-0.2625	-0.264979	-0.264059	-0.264979	-0.264979	-0.158767	-0.264979	-0.24129	-0.264979	-0.225274	-0.264979	-0.264979	3.74851	-0.264258
UHMK1	0.39219	1.0387	1.36388	-0.865321	0.248487	0.0049764	-1.05999	-0.576515	0.722353	0.0349104	-0.137073	0.392697	-1.2341	0.0011665	1.75624	-2.0826
UAP1	0.111976	0.309832	-0.834528	-0.955832	0.676835	0.0471692	0.539452	-0.504579	-0.374519	-0.7412	0.536062	-0.697932	-0.988801	-0.964926	1.04701	2.79398
HSD17B7	0.635806	1.89383	-1.12707	-0.909901	-0.479839	-0.262645	0.32845	0.158154	0.271467	-0.466723	-0.444957	1.37388	-1.16919	-1.11199	1.8041	-0.493382
NUF2	-0.495965	-0.578492	-0.447265	-0.620534	1.78491	2.01202	-0.380666	-0.561534	-0.626153	-0.62318	1.28136	-0.550405	-0.757642	-0.550655	1.53605	-0.421848
PBX1	-0.457823	-0.488635	-0.482247	1.51352	0.268016	-0.503833	0.998213	-0.512608	-0.493922	-0.286795	2.97318	-0.512608	-0.500768	-0.512608	-0.494709	-0.506372
MGST3	-0.327285	0.143732	-1.18593	1.49803	1.48588	0.713434	0.0230301	1.73155	-0.330049	1.01583	-0.896503	-0.565868	-1.2025	-1.09317	-0.292898	-0.717282
ALDH9A1	0.513507	0.83533	-1.09847	-1.67231	-0.279573	0.617163	0.850488	0.163258	1.13329	0.214759	-0.839804	1.33649	-0.906498	-1.31094	1.30924	-0.865939
TMCO1	0.492739	1.50929	-0.772042	-1.7894	0.250964	0.721751	0.62727	0.270991	0.122056	0.0849749	0.804183	-0.0501562	-1.53567	-1.52977	1.3829	-0.590083
UCK2	-0.607014	-0.347307	-0.868651	-0.670642	2.29991	1.64671	0.906995	-0.0528075	-0.54098	-0.262923	1.13656	-0.963449	-0.909869	-0.963449	0.346066	-0.149159
POGK	0.48817	-0.0118165	1.56884	-1.70927	-0.459605	0.534659	0.463861	0.592499	0.270281	0.152002	1.36701	0.898581	-1.53084	-1.29379	-0.0994073	-1.23117
TADA1	0.186429	0.26153	-1.06555	-1.46229	1.74005	0.533938	0.56971	0.009854	0.868011	-0.538387	1.36965	0.958136	-1.32144	-1.46229	-0.158843	-0.488497
POU2F1	-0.97613	-0.809131	0.844037	-1.56382	-0.807635	1.1919	-0.291381	-0.0521378	0.0117891	1.64855	0.774441	-0.079632	1.40127	0.583672	-0.352016	-1.52378
CD247	0.456054	1.01445	-0.383513	-0.377751	-0.386478	-0.380593	-0.380617	-0.375206	-0.360442	-0.380162	-0.385719	-0.3657	-0.390001	-0.371764	3.44963	-0.382186
CREG1	-0.638399	-0.908177	-0.37835	1.01368	0.224024	1.01949	1.16313	1.62018	-1.05878	1.57839	0.54715	-0.971291	-0.661378	-0.641172	-1.00289	-0.905618
RCSD1	0.0636456	0.185148	0.54505	-1.49183	-1.36457	-0.270861	0.737314	-0.1543	0.995196	-0.196153	-1.07948	2.41052	-0.0707247	0.29992	0.604155	-1.21304
MPZL1	-0.70286	-0.447428	-1.315	-1.37405	0.345681	0.0456053	0.500045	1.45698	0.345284	0.690463	1.27701	-0.830373	1.75857	-1.12515	-0.914134	0.289358
MPC2	-0.201956	-0.0898738	-0.292873	-0.200469	2.68878	-0.324945	0.333422	-0.587901	-0.368182	-0.585601	2.15617	-0.216141	-0.848388	-0.883793	0.0198585	-0.598106
DCAF6	-0.484951	-0.290238	0.72519	3.45618	0.412963	-0.371509	-0.254059	-0.363686	-0.561021	-0.365004	0.152034	-0.285087	-0.615671	0.0111879	-0.368167	-0.798162
GCSHP5	-0.214522	-0.0645682	-0.554663	-0.590034	3.45829	-0.158529	0.708047	-0.440889	-0.350398	-0.491466	0.434067	-0.0710974	-0.590034	-0.590034	-0.590034	0.105866
TIPRL	-0.0868052	0.834994	-0.861122	-1.59937	0.67072	0.443744	0.808352	-0.226198	-0.457327	-0.474178	1.82118	0.698291	-1.28746	-0.574809	1.44424	-1.15425
SFT2D2	-0.231745	0.349405	-0.0695725	-1.28709	-0.366784	1.51939	-0.318758	0.38532	0.0112597	0.874046	0.254154	1.41955	-1.13072	-1.478	1.47706	-1.40751
ANKRD36BP1	0.297935	0.600194	-0.774206	-1.02664	-0.440064	-0.515631	-0.0973412	-0.870512	1.04795	-0.0345026	0.485	1.97865	-0.905624	-0.885419	2.01353	-0.873325
XCL2	-0.203681	2.04118	-0.368792	-0.37887	-0.378455	-0.373418	-0.376814	-0.319967	-0.368741	-0.376445	-0.37887	-0.37887	-0.37887	-0.37887	2.99835	-0.37887
XCL1	0.200805	2.53541	-0.393948	-0.411973	-0.411973	-0.393689	-0.366474	-0.411973	-0.411973	-0.404884	-0.410587	-0.411973	-0.411973	-0.411973	2.52915	-0.411973
ATP1B1	-0.287062	0.0425426	-0.617747	-0.49145	-0.192518	-0.285945	3.49067	-0.239768	-0.450092	-0.0339248	0.793897	-0.509592	-0.630162	-0.630162	0.166958	-0.125645
NME7	0.308655	0.950767	-0.950519	-1.06203	1.5657	-0.63397	1.58442	-1.06203	0.839557	-0.366533	1.29988	0.192331	-1.06203	-1.06203	0.233433	-0.775586
BLZF1	-0.285438	0.871617	2.58592	-1.94443	0.0710564	-0.23442	0.283101	-0.736989	-0.612266	-0.0602421	1.2705	-0.198149	-0.403592	0.234304	0.0291793	-0.870151
F5	-0.432506	-0.46747	0.597546	-0.471425	-0.466428	-0.386591	-0.467746	-0.308092	-0.471425	-0.187339	-0.469358	-0.471425	2.49845	2.44008	-0.468056	-0.468212
SELP	-0.324594	-0.405571	-0.331926	-0.479047	0.345649	-0.471138	2.08448	-0.479047	-0.479047	-0.266606	2.87035	-0.479047	-0.154398	-0.479047	-0.479047	-0.471961
C1orf112	-0.348187	-0.625753	-0.745448	-1.03256	1.73981	1.30901	-0.2177	-0.396211	0.0412438	-0.119799	0.973009	1.43721	-0.895015	-1.30449	1.18153	-0.996663
SELL	-0.310485	-0.499715	0.374289	-0.657031	-0.659221	-0.431626	-0.114723	-0.51581	-0.15927	-0.304153	-0.62095	0.0184617	2.4904	2.42935	-0.38928	-0.650241
SCYL3	0.71065	0.681214	0.0965959	-1.67233	-0.787481	-0.665051	0.336325	-0.856624	-0.302089	-0.269472	-0.502334	2.1411	-0.211134	0.777237	1.59011	-1.06673
KIFAP3	0.0566192	0.387284	-0.896968	-0.431743	1.17593	-0.621118	0.25505	-0.334573	-0.352761	-0.542404	2.54868	-0.223903	-1.02877	-0.892466	1.60919	-0.708049
PRRC2C	0.664621	1.1122	0.778827	-2.07417	-0.548911	0.293997	-0.341395	-0.90485	0.250986	0.0404299	0.537572	0.0115434	0.106195	0.16877	1.78121	-1.87704
VAMP4	0.899919	1.66422	-0.15066	-1.55564	-0.208705	-0.77595	0.385691	-0.905098	0.421038	0.0751575	-0.262407	0.600045	-1.23362	0.151779	1.99754	-1.10333
EEF1AKNMT	-0.114194	0.756885	-1.18503	-0.398591	2.4045	0.318881	0.234416	0.131361	0.164442	-0.409097	0.572322	0.284741	-1.33767	-1.61581	1.0643	-0.871449
PIGC	0.605893	1.08218	-0.248686	-1.47848	1.02208	0.112112	1.42551	-0.234664	0.483272	-0.446699	0.278238	0.282805	-1.45365	-1.0358	1.25476	-1.64888
SUCO	-0.320057	-0.287284	0.276354	3.63972	0.249444	-0.106798	-0.321723	-0.553559	-0.410142	-0.323585	-0.150331	-0.257906	-0.503153	-0.377425	-0.0569408	-0.496617
FASLG	-0.0601058	1.58051	-0.36999	-0.36999	-0.36999	-0.36999	-0.36999	-0.36999	-0.36999	-0.36999	-0.356026	-0.36999	-0.36999	-0.36999	3.2755	-0.36999
TNFSF4	-0.22704	-0.258029	-0.121911	-0.616578	-0.505537	-0.558664	3.41002	-0.428392	-0.525655	-0.179479	0.427114	0.729208	-0.485127	0.46296	-0.513614	-0.609279
AL645568.1	-0.167648	0.23157	1.69201	-0.68201	-0.757809	-0.644148	-0.714921	-0.704579	-0.0916404	-0.474176	-0.623866	-0.692777	1.98988	2.06416	0.0886573	-0.512702
PRDX6	-0.392333	0.162539	-1.27288	1.00232	1.89314	0.214134	1.62291	-0.302423	-0.791655	-0.295811	1.27481	-0.798224	-1.31898	-0.942466	0.314269	-0.369357
KLHL20	1.46338	1.62521	-0.410422	-0.85012	0.120221	-0.595137	0.820723	0.448995	0.297066	0.077545	0.146018	-0.298512	-1.70228	-1.0343	1.34297	-1.45136
CENPL	0.269607	0.361606	-0.516444	-1.05843	1.63266	1.85447	-0.459788	-0.835976	-0.305529	-0.498337	1.04751	-0.136555	-0.999211	-1.05843	1.4853	-0.782447
DARS2	-0.122738	-0.254131	-1.04798	-0.584986	0.928457	1.70859	0.0330444	0.283342	0.141467	-0.118784	1.60167	0.439425	-1.69654	-1.47428	1.01968	-0.85624
GAS5	1.03596	-0.0734199	-0.786056	-0.887467	0.309361	-0.29983	2.3541	-0.610331	0.440799	-0.483861	1.77526	0.400662	-0.909065	-0.914324	-0.452894	-0.898896
ZBTB37	-0.572366	-0.180479	1.54383	-0.86499	-0.75375	-0.49322	-0.391509	-0.70762	-0.422429	-0.237943	-0.393393	-0.192049	1.26045	2.61894	0.650137	-0.86361
RC3H1	-0.533468	-0.0842197	1.05951	-0.524708	-0.76785	-0.238804	-0.558607	-0.228397	-0.558641	-0.414926	-0.679714	-0.384865	2.18366	2.20146	0.624965	-1.09539
RABGAP1L	0.245973	2.22895	-0.600345	0.342551	0.0341907	-0.974303	-0.762198	-0.656611	0.0256292	-0.655533	-0.280465	0.174872	0.0907751	-0.556115	2.37022	-1.02759
CACYBP	0.42953	0.17268	-0.945119	-1.23948	2.23626	0.678338	0.260144	-0.205956	0.234696	-0.394587	1.79865	-0.270054	-1.06297	-1.21353	0.284665	-0.763268
MRPS14	0.223832	0.403722	-1.15186	-1.63992	0.954136	0.817123	0.676887	0.887846	0.273761	0.354142	0.825033	0.0741362	-1.716	-1.79883	0.930669	-0.114679
KIAA0040	-0.210853	-0.0920857	1.0504	-1.04182	-0.926523	-0.626466	-0.637573	-0.488407	0.587889	-0.376944	-0.757833	0.272838	2.32432	1.94856	-0.493629	-0.531877
COP1	-0.456053	-0.333739	1.89825	-1.32273	-0.686111	-0.0541337	-0.571213	-0.11604	-0.448161	0.0724355	-0.408249	0.138509	1.54601	2.10087	-0.235904	-1.12375
AL365357.1	-0.194912	-0.477352	-0.955473	-0.932764	2.06479	0.345467	2.23329	0.948624	0.0850133	-0.590779	0.163714	0.138065	-0.933957	-0.995946	-0.525377	-0.372402
RALGPS2	-0.506936	-0.565229	-0.125051	-0.297282	-0.365591	-0.458791	-0.395041	-0.552567	1.983	-0.457802	-0.353494	2.98348	-0.350446	-0.033914	-0.469918	-0.034422
FAM20B	-0.230908	-0.225875	-0.929494	1.68869	1.11627	0.683992	0.101346	-0.576289	-0.104887	0.168788	2.1612	-0.259824	-1.2345	-1.2778	0.00976109	-1.09047
TOR3A	-0.0322814	0.228111	-1.11435	-1.24603	0.101884	0.273188	0.0955971	0.120934	1.38569	-0.244503	-0.0602813	0.159735	-1.1722	-1.24603	0.0858132	2.66472
ABL2	0.196152	0.070682	-0.795808	-1.56202	-0.877728	0.821158	1.07134	-0.903341	-0.181833	1.54872	1.1259	-1.23267	0.765204	1.03802	0.167271	-1.25103
SOAT1	-0.0766023	0.20633	-0.825135	-1.43183	-0.892549	1.91706	-0.882678	1.0008	-0.445285	1.48529	-0.608171	-0.353722	0.935602	0.22296	0.901549	-1.15363
TOR1AIP2	-0.791585	-0.591685	1.78753	0.00942452	-0.433216	-0.208704	-0.645927	-0.789939	-0.654662	-0.104599	0.0590567	-0.326825	1.68551	2.24156	-0.184165	-1.05177
TOR1AIP1	-0.0827102	0.123812	2.90985	-1.07459	-0.82949	0.076564	-0.378548	-0.611565	-0.40655	-0.130857	-0.606097	-0.199428	0.836764	1.34542	0.0484072	-1.02099
CEP350	-0.394587	-0.199013	2.45082	-1.11532	-0.723223	0.286485	-0.679776	-0.369206	-0.400735	0.146358	-0.326681	-0.514193	0.856359	1.91813	0.220591	-1.15601
QSOX1	-0.614336	-0.594082	2.3436	-0.829056	-0.79443	1.18463	-0.260259	0.539073	-0.826739	0.497759	-0.728997	-0.820882	1.02155	1.24578	-0.549088	-0.814532
ACBD6	0.0588927	0.337311	-1.42719	-1.77107	1.39288	-0.11355	1.36666	-0.150555	-0.260995	-0.413623	1.37858	0.795803	0.652971	-1.24577	0.383296	-0.983644
XPR1	0.500098	0.842021	-0.804383	0.868524	0.0400829	0.060667	-0.616968	1.61666	-0.283107	2.02912	-0.578516	-0.929416	-1.0887	-0.8669	0.604377	-1.39355
STX6	-0.647501	0.092779	0.573406	-0.852508	-0.880605	-0.337042	-0.613854	0.911013	-0.326046	0.742975	-0.150999	-0.947745	1.37814	2.21675	0.506153	-1.66492
MR1	-0.11027	0.472839	1.92988	-1.42231	-1.31744	0.120986	-0.680144	-0.214962	0.55297	0.521018	-0.560021	-0.972568	1.10471	0.869623	1.05722	-1.35154
IER5	0.162619	0.311931	-0.957914	-1.23487	-0.35321	-0.152783	-0.895138	0.553348	2.54696	1.04512	-0.52058	0.661744	-0.846086	-0.397221	1.0414	-0.965319
GLUL	-0.924347	-0.847719	-0.189782	0.240135	0.137257	0.0774796	0.684072	0.605662	-1.29284	0.92545	0.750408	-1.30881	1.7496	1.5029	-0.804817	-1.30464
RNASEL	0.325746	0.171894	0.561961	-1.35387	-0.887303	-0.512	-0.186448	-0.143193	0.279452	0.15857	-0.723401	-0.517418	1.37472	2.7446	-0.168345	-1.12497
RGS16	-0.260134	-0.275667	-0.322582	3.68814	0.408478	-0.324203	-0.27883	-0.332513	-0.300123	-0.316385	-0.16671	-0.332513	-0.30414	-0.332513	-0.332513	-0.217798
NPL	-0.773978	-0.721471	0.501261	1.3935	-0.314604	-0.613061	-0.817781	1.26038	-0.786584	0.924914	-0.639377	-0.830951	2.05571	0.947511	-0.768766	-0.816703
DHX9	0.102805	-0.102499	-0.502467	-0.577379	1.31202	1.69124	-0.0439057	-0.774523	0.325105	0.0313168	1.96315	-0.376785	-1.2052	-0.821567	0.597945	-1.61925
SMG7	-0.553935	-0.335257	1.54343	-0.757086	-0.819498	0.285342	-0.343132	-0.638007	-0.525863	0.130271	-0.341305	0.243611	2.09508	1.72014	-0.117524	-1.58626
NCF2	-0.61535	-0.617539	1.23634	-0.617738	-0.619645	-0.165929	-0.61485	0.227839	-0.569354	0.438149	-0.616896	-0.591237	2.09371	2.25958	-0.612983	-0.614089
ARPC5	-0.538157	-0.497961	2.33879	-0.879944	-0.74141	0.155066	-0.572746	0.00600169	-0.568947	0.337402	-0.535711	-0.520282	1.15774	2.04622	-0.380451	-0.805613
RGL1	-0.27461	-0.400938	-0.301596	-0.400938	-0.38633	-0.284256	-0.335031	2.9402	-0.400938	2.12004	-0.381079	-0.307131	-0.400938	-0.400938	-0.400938	-0.384586
TSEN15	-0.112046	0.945828	-1.13932	-1.3998	1.02788	1.05994	0.829596	0.442755	-0.425551	-0.111161	0.902684	0.0933036	-1.54042	-1.66581	1.25666	-0.16453
C1orf21	-0.493902	1.64668	-0.565806	-0.575753	-0.164149	-0.0880601	0.684725	-0.494404	-0.560609	-0.376938	0.323848	-0.575753	-0.575753	-0.575753	2.96065	-0.569013
EDEM3	-0.494366	-0.544874	2.78297	0.0391063	-0.690728	1.07072	-0.470427	-0.382275	-0.918791	0.675021	-0.54104	-0.579904	0.602194	1.06197	-0.746966	-0.862605
FAM129A	-0.336353	-0.0777725	0.00934509	-0.537443	-0.501773	-0.118873	-0.462295	-0.413448	-0.512044	-0.30783	-0.394437	-0.542873	3.12254	1.75746	-0.167321	-0.516884
RNF2	0.0879745	0.531821	-0.774865	-1.3881	0.928887	0.107981	1.47051	0.0162215	0.0291744	0.554774	1.25197	-0.765348	-0.180696	-1.82754	1.26504	-1.30781
TRMT1L	-0.464349	-0.655035	1.022	2.92314	-0.159073	-0.0900085	-0.584626	-0.635742	-0.78235	-0.137548	0.0558993	-0.36479	0.199585	1.27468	-0.432058	-1.16972
SWT1	-0.541901	-0.514209	0.456334	3.4799	-0.246289	-0.751639	-0.240785	-0.628341	-0.366152	-0.414059	0.480152	0.10224	0.255894	-0.374086	-0.189363	-0.5077
AL356273.3	-0.40224	-0.396895	1.81237	-0.372844	-0.525196	-0.462583	-0.506618	-0.493112	-0.508844	-0.374588	-0.4335	-0.547541	2.64683	1.41177	-0.316491	-0.53051
IVNS1ABP	-0.448533	-0.361543	2.44506	-0.562335	-0.481879	-0.41247	-0.588415	-0.485942	-0.527531	-0.326572	-0.443841	-0.544289	1.48336	1.9739	-0.0805331	-0.638428
AL078644.2	-0.354042	-0.343489	2.29301	-0.539628	-0.494686	-0.366445	-0.539628	-0.461115	-0.454887	-0.259605	-0.379074	-0.539628	2.62233	0.620993	-0.279635	-0.524475
TPR	0.0296109	0.829158	-0.535747	-1.76808	0.903525	0.629441	0.110495	-0.981406	-0.0245566	-0.179284	1.99685	0.417741	-0.357056	-0.0977047	0.910918	-1.88391
ODR4	-0.395223	0.194025	-0.548533	-1.45251	0.273588	0.425276	1.30854	-0.833936	0.576466	1.3899	1.10863	-0.0608674	-1.29825	-1.75125	1.20907	-0.144914
PTGS2	-0.504911	-0.505484	1.16002	-0.507187	-0.485898	-0.373684	-0.380424	-0.433354	-0.499292	-0.295941	-0.271603	-0.507187	1.88878	2.72632	-0.504142	-0.506012
PLA2G4A	-0.969394	-0.788983	1.89185	-0.401227	0.446616	0.411665	1.07045	0.175236	-0.969394	0.761342	1.65203	-0.969394	0.526475	-0.969394	-0.969394	-0.898486
RGS18	-0.579914	-0.575365	0.983768	-0.579586	-0.495215	-0.212981	-0.451744	-0.265527	-0.587862	-0.0664527	-0.113311	-0.587592	2.26551	2.43681	-0.58079	-0.589743
RGS1	1.05183	3.2725	-0.511333	-0.519371	-0.51977	-0.397601	-0.263478	-0.494045	-0.249394	-0.260415	-0.352321	-0.503514	-0.533252	-0.547414	0.902322	-0.0747387
RGS2	-0.441973	-0.4737	0.154961	-0.584769	-0.579136	-0.430957	-0.505725	0.00186329	-0.368826	0.319566	-0.491518	-0.565362	2.7377	2.16627	-0.398323	-0.540067
UCHL5	-0.0245753	0.84856	-0.825056	-0.74709	1.62607	0.527933	0.146247	-0.331399	-0.396021	-0.491412	1.21581	-0.313594	-1.3398	-1.34113	2.02143	-0.575974
RO60	-0.218222	0.875693	1.58355	-1.05844	0.647186	-0.157803	-0.284978	-1.21349	-0.956798	-0.13772	0.940705	0.0171526	-0.587069	0.872826	1.50932	-1.83192
GLRX2	-0.239701	0.892516	0.647034	-1.96961	0.693379	0.535727	0.321534	-0.50509	-1.03265	0.184823	1.8075	-0.514917	-1.37468	-0.248483	1.35403	-0.551408
CDC73	0.124801	0.429208	2.82472	0.176335	-0.473004	-0.434424	-0.512117	-0.866124	-0.627074	-0.0296389	-0.261589	-0.718126	1.23009	0.299413	0.445547	-1.60801
CFH	0.509023	-0.02052	-0.483547	-0.5139	-0.131638	-0.484144	3.35551	-0.5139	-0.5139	0.900497	0.386265	-0.5139	-0.5139	-0.5139	-0.447412	-0.500637
ASPM	-0.577709	-0.605276	-0.153944	-0.46052	1.3971	2.66457	-0.354528	-0.684397	-0.688665	-0.348745	1.2369	-0.692359	-0.695247	-0.532581	0.927152	-0.431756
ZBTB41	0.340306	0.645376	-0.587802	-0.941142	-0.82571	0.238737	-0.201085	-0.714759	0.144449	0.38645	-0.036221	2.65737	-1.33928	-0.399512	1.4477	-0.814887
CRB1	-0.256688	-0.29525	-0.29525	3.73893	-0.19466	-0.29525	-0.0447221	-0.29525	-0.29525	-0.126231	-0.164136	-0.29525	-0.29525	-0.29525	-0.29525	-0.29525
DENND1B	-0.211776	0.812645	1.71129	-1.70244	-0.947956	0.161193	0.257811	-0.920132	-0.533943	0.206794	-0.238242	-1.2315	0.628804	1.25977	1.4845	-0.736811
NEK7	0.0646167	0.667417	0.855896	-0.244021	-1.05071	-0.572561	-0.375028	-0.43751	-0.954663	0.255877	-0.869447	0.104752	2.548	1.02723	0.534839	-1.55469
PTPRC	-0.0439673	0.728794	0.902232	-0.979634	-0.949423	-0.587434	-0.640958	-0.591097	-0.396191	-0.144568	-0.801086	-0.18237	2.11299	2.04681	0.49339	-0.967493
PEBP1P3	1.24024	1.22441	-0.151093	-0.835997	-0.802915	-0.652694	-0.631338	-0.756205	0.0334389	-0.389385	-0.703098	-0.343745	0.358098	0.501324	2.71983	-0.810871
MIR181A1HG	-0.608719	-0.66335	-0.927432	-0.878841	0.0249731	1.0166	1.72166	-0.121509	-0.65173	1.10215	1.88537	-0.400942	-0.831462	-0.783812	1.02716	-0.910124
ZNF281	-0.513374	-0.434382	0.968606	-0.705577	-0.482531	-0.349607	-0.477556	-0.40158	-0.509508	-0.169673	-0.33368	-0.340813	2.34783	2.40717	-0.362423	-0.642903
KIF14	-0.498962	-0.543308	0.206529	-0.536415	0.905408	3.20148	-0.288557	-0.577854	-0.571319	-0.187348	0.977965	-0.627571	-0.535627	-0.627571	0.169769	-0.466615
DDX59	-0.0818823	0.875613	0.436784	-1.63873	-1.0169	-0.203311	-0.12503	-0.0814006	-0.437521	0.0148344	-0.603344	-0.501096	1.86165	1.70316	1.13529	-1.33812
KIF21B	0.204321	1.15597	2.38811	-0.853902	-0.861247	-0.71874	-0.723593	-0.507965	-0.45493	-0.713415	-0.800663	-0.263289	0.634616	1.18049	1.13443	-0.80019
TMEM9	-0.267812	-0.198843	-1.32323	0.584021	2.01071	0.135398	1.726	-0.546386	-0.388106	-0.442121	1.1084	-0.530192	-1.2337	-1.21428	0.757666	-0.177539
CSRP1	-0.0694774	0.358617	-0.165704	-1.37308	1.39545	0.523514	2.04186	0.609502	-0.863652	0.197008	1.18493	-1.22242	-1.22138	-0.927916	-0.0808552	-0.386407
NAV1	-0.383959	-0.410906	0.0700101	-0.970004	-0.746849	0.874654	2.24941	1.09693	-0.286328	1.87471	-0.232398	-0.669622	-0.896449	-0.970004	-0.553575	-0.045631
IPO9	0.222777	0.349184	-0.99452	-1.19226	1.22569	1.18784	0.399552	-0.396669	0.0604851	0.287093	1.90008	0.418386	-1.48995	-1.39929	0.407557	-0.985957
TIMM17A	-0.216657	0.25722	-0.880602	-1.17933	1.58388	1.73916	-0.133855	0.351178	-0.224323	0.524421	1.30828	-1.03759	-1.45862	-1.26337	0.243411	0.386793
RNPEP	-0.544206	-0.185857	-0.0509329	-1.05737	-0.474196	1.54989	-0.315971	2.68339	-0.493705	1.38491	-0.603319	-0.61029	-0.224408	-0.336418	0.0260376	-0.747559
ARL8A	-0.462706	-0.297295	1.74233	-1.021	-0.774181	-0.179471	-0.562576	-0.265322	-0.222897	0.0636282	-0.602301	-0.508	2.04008	1.99415	-0.0588355	-0.885611
PTPN7	0.83808	2.08216	0.595385	-1.11302	0.0643034	-0.137264	0.213309	-1.0059	-0.547435	-0.829258	0.326555	-0.30308	-0.649928	-0.729957	2.08669	-0.890641
UBE2T	-0.40157	-0.349191	-0.540541	-0.569612	3.06161	0.544552	0.0353169	-0.530413	-0.387598	-0.575843	1.57624	-0.42908	-0.616623	-0.656689	0.213618	-0.374179
PPP1R12B	-0.568235	-0.397453	2.22972	-0.409629	-0.475229	-0.18237	-0.55602	-0.606378	-0.432395	-0.303242	-0.418529	-0.561104	1.42674	2.22066	-0.136289	-0.830249
KDM5B	-0.904143	-0.575941	0.909383	0.622899	0.0361211	-0.433707	1.72202	-1.14436	-0.843173	-0.214559	1.89071	-0.776173	0.510079	0.883155	-0.215835	-1.46648
AC098934.1	-0.49519	-0.53565	-0.386165	-0.53565	0.174105	3.02009	1.53566	-0.3891	-0.53565	-0.116586	0.851443	-0.53565	-0.444707	-0.53565	-0.53565	-0.53565
RABIF	-0.103136	0.552634	-0.0158788	-2.16668	-0.794413	0.00345783	-0.478462	0.686147	0.0438925	-0.0690289	-0.380572	0.245499	0.213116	2.19826	1.36801	-1.30284
KLHL12	-0.311023	-0.243712	1.71616	-0.339905	1.64945	0.194715	0.148829	-0.358368	0.574649	0.278663	1.11037	-2.07677	-0.426091	-0.054637	-0.223536	-1.6388
ADIPOR1	-0.501274	-0.372229	0.0499464	3.47338	-0.17013	-0.442731	-0.562856	0.348031	-0.530825	-0.108781	-0.577572	-0.513393	0.551001	0.390331	-0.527133	-0.50577
CYB5R1	-0.268986	-0.523756	1.16651	1.28449	-0.000284798	-0.708769	1.29692	1.23689	-0.738128	1.07717	-1.68043	-0.869357	0.541962	0.251393	-1.30965	-0.755986
TMEM183A	-0.42131	0.0394703	1.11243	0.192885	1.37905	1.77037	-0.570538	0.888404	-0.688016	0.135906	0.593161	-0.677324	-1.05815	-0.732822	0.138195	-2.10172
CHI3L1	-0.29179	-0.296246	3.73016	-0.187658	-0.312518	-0.287363	-0.285344	-0.330585	-0.242965	-0.294503	-0.286613	-0.300514	0.0550022	-0.068911	-0.280774	-0.319379
CHIT1	-0.286337	-0.299245	3.73515	-0.228388	-0.28103	-0.27744	-0.302828	-0.303288	-0.271814	-0.267611	-0.288626	-0.286576	-0.151196	0.0543364	-0.271315	-0.273792
BTG2	1.16956	0.0538669	-0.477609	0.0863359	-1.34387	-1.07658	-0.167204	-1.18452	-0.0424374	-0.722948	-1.23125	0.0297774	1.57006	0.476982	1.13466	1.72517
ATP2B4	0.241986	1.61501	-0.884623	-0.373572	0.127641	0.503434	0.553165	-0.416097	-1.09854	0.0730048	-0.128992	-1.38566	0.543246	-0.461167	2.33587	-1.2447
LAX1	0.655641	1.46239	-0.609786	-0.60455	-0.647028	-0.606391	-0.604088	-0.624014	0.294333	-0.614782	-0.547728	-0.388238	-0.653758	-0.547545	2.44685	1.5887
ZC3H11A	1.59986	2.46024	-1.22196	-0.0854502	0.539711	-0.981223	0.215585	-0.92956	0.445046	-0.792947	-0.738412	0.156973	-0.590281	-0.152165	0.727027	-0.652444
SNRPE	-0.167653	-0.404558	-0.878058	-0.989023	1.88887	0.985846	0.72046	0.00812936	-0.0643877	-0.0922085	2.30769	-0.29649	-1.0963	-0.816455	-0.33581	-0.77006
PPP1R15B	-0.474252	-0.473255	1.52971	-0.569951	-0.68226	0.243057	-0.68881	-0.430384	-0.449033	0.23062	-0.542146	-0.552354	2.7853	1.15795	-0.25778	-0.826419
PIK3C2B	0.375862	0.635506	-0.653176	-0.739594	-0.701409	-0.546127	-0.193192	-0.628911	2.40832	-0.276519	-0.601789	2.21818	-0.739594	-0.573625	0.341978	-0.325908
MDM4	-0.568156	-0.252813	0.816157	-1.15293	-0.997123	-0.562586	-0.424602	-1.16727	0.351973	-0.111457	0.0651536	1.73854	1.28684	1.82956	0.360375	-1.21167
RBBP5	0.396916	0.0915334	1.31171	-2.45637	-0.172594	0.388567	-0.34418	-0.294749	0.175187	-0.470488	0.657517	1.66494	0.574717	0.0280863	0.147546	-1.69834
DSTYK	-0.397567	-0.118464	1.1398	3.2691	0.085065	-0.176656	-0.391816	-0.391628	-0.670281	-0.172166	0.252592	-0.63104	0.0220005	-0.332589	-0.330999	-1.15535
TMCC2	-0.2535	-0.250604	-0.255455	3.74945	-0.186599	-0.256707	-0.254266	-0.257102	-0.248314	-0.255613	-0.253759	-0.257102	-0.257102	-0.257102	-0.251831	-0.254392
NUAK2	-0.302397	-0.375197	-0.283842	-0.852654	-0.844082	-0.668953	-0.710936	-0.339745	0.322417	-0.463758	-0.820861	1.77899	1.95459	2.01147	-0.01111	-0.393928
KLHDC8A	-0.271143	-0.271143	-0.266507	3.74301	-0.0298626	-0.271143	-0.271143	-0.271143	-0.271143	-0.271143	-0.203778	-0.271143	-0.271143	-0.271143	-0.271143	-0.260281
SNRPGP10	-0.240499	-0.1289	-0.903607	-0.971914	2.87739	1.00217	0.814286	-0.0973913	0.641199	-0.485189	0.11158	-0.0705972	-0.971914	-0.971914	-0.788202	0.183498
ELK4	0.870885	1.35917	-0.862597	-1.27259	-0.332694	-0.0969635	-0.150875	-0.653003	1.28989	0.14791	0.179619	1.08352	-1.13022	-1.15917	1.72076	-0.993648
SLC45A3	-0.455871	-0.502337	-0.502337	-0.502337	-0.183099	-0.342048	3.33569	-0.502337	1.11723	-0.0236397	0.519389	0.0274124	-0.502337	-0.502337	-0.502337	-0.478709
NUCKS1	-0.0874055	0.00610188	-0.952518	-1.06052	0.93146	1.80982	0.476752	-0.44882	-0.174494	-0.310917	2.22638	0.271065	-1.1456	-1.00414	0.350363	-0.887533
RAB29	0.465992	1.11005	0.153985	-0.977942	-0.902893	-0.133835	-0.426936	-0.320907	0.685139	-0.347227	-0.791573	0.50901	-0.635105	-0.522158	2.94105	-0.806656
CTSE	-0.369894	-0.381746	-0.35585	2.24967	2.84169	-0.37872	-0.374376	-0.381746	-0.275324	-0.375803	-0.347176	-0.381746	-0.381746	-0.381746	-0.381746	-0.323738
BX571818.1	-0.525692	-0.53256	-0.53625	-0.51381	-0.479371	-0.465271	2.00363	-0.547337	2.15009	-0.453295	-0.476162	1.78685	-0.547337	-0.49791	-0.547337	0.181752
RHEX	-0.430912	-0.42512	-0.395116	-0.435891	-0.205399	-0.314439	3.22013	-0.435891	-0.383344	0.235483	1.59916	-0.435891	-0.358212	-0.435891	-0.40929	-0.389377
SRGAP2	-0.627347	-0.205459	1.26378	-0.728113	-0.838451	1.23916	-0.558431	1.63189	-0.458017	2.28617	-0.533711	-0.225284	-0.521647	-0.553962	-0.279163	-0.891418
IKBKE	1.10916	1.60894	-0.927069	-1.12077	-0.800576	0.446705	-0.17058	0.398882	0.216608	1.19137	-0.626491	-0.0874086	-1.05584	-1.12077	1.76501	-0.827179
RASSF5	0.105443	0.388132	1.11012	-0.946533	-0.83422	-0.633483	-0.711187	-0.596832	-0.3553	-0.486535	-0.727154	-0.409306	1.77191	2.26784	0.867322	-0.810221
EIF2D	0.691673	-0.176524	-1.18593	-1.29163	1.63769	0.0247398	1.67819	0.0848129	0.115981	0.0606379	1.09808	0.771438	-1.32725	-1.35317	-0.135599	-0.693151
DYRK3	-0.301638	-0.309134	-0.335568	3.67058	0.476282	-0.292004	-0.175505	-0.338144	-0.338144	-0.315848	-0.0842477	-0.338144	-0.338144	-0.338144	-0.324907	-0.317289
MAPKAPK2	-0.353312	0.57008	1.37995	-0.92337	-1.04109	0.951979	-0.31729	-0.360237	-0.809407	-0.384045	-0.787101	-1.0406	2.14355	1.3623	0.324122	-0.715531
AL591846.1	0.0494916	-0.406105	-0.780998	-0.815924	2.23988	0.455767	2.07011	1.11875	0.24606	-0.63597	-0.480038	-0.815924	-0.765501	-0.726506	-0.511927	-0.241164
IL10	-0.309581	-0.340464	-0.309662	-0.355981	-0.354984	-0.246628	-0.355981	3.4647	-0.338705	1.19574	-0.353589	-0.355981	-0.284346	-0.355981	-0.355981	-0.342577
FCMR	0.488003	0.664896	-0.575718	-0.57736	-0.582488	-0.564967	-0.502718	-0.573111	1.50734	-0.568583	-0.581439	2.8041	-0.565796	-0.584963	0.789755	-0.576954
PFKFB2	-0.477256	-0.494675	2.12928	-0.486718	-0.481875	-0.481738	-0.344073	-0.509783	-0.401026	-0.466959	-0.450448	-0.373717	1.50383	2.33129	-0.486197	-0.509929
YOD1	-0.424488	-0.409366	0.519355	3.56285	-0.178087	-0.352274	-0.399121	-0.461625	-0.458944	-0.374648	-0.247369	-0.445321	0.326451	0.226409	-0.414358	-0.469459
CD55	-0.460796	-0.562588	1.05593	-0.300951	-0.630369	-0.470061	-0.59226	-0.309007	-0.422627	-0.114522	-0.568726	-0.283479	2.52887	2.15245	-0.344853	-0.67701
CR2	-0.412851	-0.453745	-0.447346	0.010236	-0.412125	-0.453745	-0.453745	-0.453745	1.26601	-0.453745	-0.453745	3.36045	-0.165414	0.213373	-0.439664	-0.250194
CR1	-0.456213	-0.470365	0.250893	-0.365822	-0.450313	-0.425515	-0.434568	-0.375618	-0.34016	-0.259255	-0.434061	-0.335765	2.62945	2.41165	-0.471083	-0.473263
CR1L	-0.31753	-0.311909	-0.307238	3.62408	0.718817	-0.3177	-0.31673	-0.320575	-0.320575	-0.303877	-0.286525	-0.320575	-0.297508	-0.320575	-0.282831	-0.318743
CD46	-0.325126	-0.112447	1.56588	-0.866145	-0.562015	-0.526165	-0.392937	-0.524188	-0.451399	-0.198355	-0.453625	-0.453556	1.96571	2.34717	-0.264667	-0.748137
MIR29B2CHG	-0.494071	-0.749502	-0.831602	0.499335	-1.04905	-0.70195	0.0609239	-0.387796	2.87159	0.133578	-0.968286	0.900465	1.13623	0.163962	-0.343408	-0.240421
CD34	-0.372458	-0.347739	-0.360028	-0.344553	0.110815	-0.370269	3.58498	-0.388506	-0.372875	-0.130488	0.748349	-0.388506	-0.321833	-0.303191	-0.355192	-0.388506
G0S2	-0.403194	-0.407727	0.234421	-0.408561	-0.278373	-0.394124	-0.407958	-0.328967	-0.407324	-0.367102	-0.387839	-0.408561	3.28585	1.48427	-0.407887	-0.39693
TRAF3IP3	0.96365	1.58681	-0.264115	-0.984196	-0.914287	-0.525665	-0.598815	-0.364747	0.428553	-0.545838	-0.790945	1.33021	-0.43645	-0.262553	2.24243	-0.864045
UTP25	0.781241	0.940303	-1.10039	-1.19263	0.725579	-0.408223	0.242007	-0.680451	0.882181	-0.17053	1.07845	1.39504	-1.25803	-1.29624	1.14356	-1.08188
RCOR3	-0.491731	-0.250448	1.48887	0.473699	-0.745702	-0.595209	0.0698135	-1.32781	-0.0840223	0.0157273	0.106915	0.339714	0.829046	1.83251	0.58643	-2.2478
TRAF5	0.650465	0.605507	-0.621613	-0.702794	-0.631063	-0.583994	-0.0285502	-0.617321	1.41183	-0.549457	-0.504536	2.76174	-0.675876	-0.64592	0.82379	-0.692211
LINC00467	-0.803174	-0.616978	-0.656497	-1.66687	0.0774954	0.501191	0.967676	1.18436	0.155517	0.546057	1.25597	1.49596	-1.08576	-1.66687	0.0446027	0.26733
SLC30A1	-0.556348	-0.372067	-0.212999	3.6138	-0.0169371	-0.0701022	-0.467964	0.128746	-0.465347	0.428633	-0.403407	-0.505421	-0.291838	-0.146703	-0.154843	-0.507199
NEK2	-0.463719	-0.524493	-0.189381	-0.554139	1.17164	3.23479	-0.281576	-0.511548	-0.466322	-0.482179	0.524987	-0.554139	-0.472329	-0.554139	0.519028	-0.396476
LPGAT1	-0.604264	-0.372069	2.25526	-0.89163	-0.732457	-0.231885	-0.559711	-0.551618	-0.360966	-0.0316635	-0.606893	-0.155142	1.47908	1.96477	0.271972	-0.872784
INTS7	-0.480155	0.0635459	-0.575468	-0.838853	1.40135	1.15432	0.365542	-0.319403	-0.420599	-0.074239	2.01618	-0.989283	-1.06675	-1.12169	1.48785	-0.602346
DTL	-0.574219	-0.591581	-0.505476	-0.334989	2.39992	1.60037	-0.211477	-0.614172	-0.599691	-0.431234	1.9126	-0.556331	-0.614172	-0.335695	-0.100197	-0.443646
PPP2R5A	-0.324129	-0.0339442	2.23289	-0.819455	-0.648323	-0.371456	-0.506879	-0.487037	-0.529746	-0.304575	-0.497785	-0.568305	1.51462	2.06424	0.101176	-0.821286
TMEM206	0.629448	1.79255	-1.30936	-1.38898	0.0578284	-0.0107372	0.908046	0.00329897	0.395357	-0.0410498	1.32296	0.184864	-1.27407	-1.38898	0.90109	-0.782263
NENF	-0.182185	-0.213886	-1.11523	-1.09088	1.54256	0.735653	1.55537	-0.0071695	-0.224085	-0.140784	1.98255	-0.471371	-1.12285	-1.14427	-0.469519	0.366102
ATF3	-0.0230528	0.882206	-1.07695	-1.03739	-0.171614	-0.187561	1.04583	1.81713	-0.213389	0.413415	-0.36113	-0.57384	-0.973457	-0.873706	2.12425	-0.790732
NSL1	0.31788	0.65628	-0.116261	-2.37603	0.192176	0.53035	0.332804	0.802113	1.12856	0.840294	0.454518	0.37504	-0.616737	-1.32519	0.533128	-1.72893
TATDN3	-0.636102	0.0748681	-0.0929062	-0.553642	-0.588767	0.123631	0.359388	1.49946	0.428837	1.23846	-0.298398	2.3404	-0.943622	-1.43536	-0.483542	-1.0327
FLVCR1	-0.230107	-0.235894	3.60565	-0.583278	-0.156849	0.240487	0.0995628	-0.372994	-0.184637	-0.0267345	0.160949	-0.406885	-0.559149	-0.710699	-0.131881	-0.507545
ANGEL2	0.400011	1.86623	-0.322856	-1.50294	-0.44782	-0.166763	-0.110268	-0.372338	0.85452	0.150392	0.377076	1.02951	-0.994024	-1.24474	1.65718	-1.17317
RPS6KC1	-0.579078	0.435803	-1.05896	-0.218121	0.500803	0.221945	1.4821	0.886441	0.0324259	1.40351	0.346764	0.390764	-1.65993	-1.55346	0.782635	-1.41364
SMYD2	1.08229	1.57745	-1.15995	-1.28616	0.0136926	0.524249	-0.164892	-0.143773	0.333982	-0.183357	-0.0962808	1.44352	-1.34436	-1.43857	1.30089	-0.458727
CENPF	-0.563911	-0.60677	-0.194493	-0.425976	1.72616	2.39441	-0.196239	-0.597033	-0.630865	-0.362182	1.71652	-0.617763	-0.618142	-0.637645	0.171893	-0.557956
KCTD3	-0.864608	-0.944394	-0.140068	-0.784614	1.38101	1.33094	1.50166	0.408921	-0.371856	0.671962	1.66918	-0.944394	-0.944394	-0.944394	-0.358168	-0.666793
GPATCH2	0.125881	0.882479	-1.16162	-1.03584	0.294381	0.265634	0.674811	-0.903473	0.583677	0.240116	0.935773	0.151431	-1.18801	-1.50436	2.24073	-0.601612
RRP15	0.334474	-0.074456	-1.41225	0.371425	1.63483	-0.190941	0.494662	-0.15249	1.10399	-0.290037	1.69161	0.272952	-1.50744	-1.50744	0.204542	-0.973442
LYPLAL1	-0.104444	0.667057	-0.976212	-1.61356	0.406841	-0.528642	1.06147	-0.346853	2.26612	-0.118341	0.779527	1.10054	-1.01497	-0.531769	-0.0403956	-1.00638
EPRS	0.033851	0.211099	-1.14522	-0.16123	2.038	0.680725	0.336516	-0.351041	-0.403833	-0.00382514	1.85219	-0.262707	-1.56573	-1.56352	-0.128918	0.433646
BPNT1	0.119081	-0.171791	1.1635	-1.55368	-0.422299	-0.335127	0.419448	-0.175324	1.75957	-0.0553372	0.526241	1.07147	-0.892035	-1.6339	1.24889	-1.0687
IARS2	0.163027	0.173918	1.22859	-2.00773	0.483345	1.80864	-0.30015	0.659181	-0.25237	0.584498	0.830142	-0.666972	-1.20182	-0.727572	0.495873	-1.2706
RAB3GAP2	-0.179032	-0.0452101	2.38482	-1.53892	-0.167648	0.364422	-0.411945	-0.947676	0.206081	0.114481	0.361328	-0.944685	0.229782	1.782	-0.0358988	-1.1719
2001-03-01	-0.57871	-0.581189	1.81615	-0.565461	-0.584565	0.0759567	-0.543185	-0.216718	-0.575225	-0.0324308	-0.534885	-0.588674	1.79821	2.26941	-0.581184	-0.577506
HLX	-0.632718	-0.639866	2.85346	-0.646149	-0.643426	0.313911	-0.373269	0.111815	-0.446384	0.113222	-0.620909	-0.593674	1.04165	1.44988	-0.646149	-0.641392
DUSP10	0.269163	0.684927	-0.672633	-1.01202	-0.599424	0.489617	1.19566	-0.272875	-0.801481	0.842784	0.757941	-0.704396	-0.938055	-0.730894	2.46757	-0.975882
TAF1A	0.0611687	0.0725863	-0.565483	-0.753479	0.0575497	-0.132589	-0.249309	-0.553896	0.930056	-0.378961	0.150588	3.37857	-0.606096	-0.753479	-0.0872268	-0.570004
MIA3	0.74656	1.15664	-0.780171	-1.13618	-0.72837	-0.480554	-0.135192	-0.899656	1.1957	0.429416	0.76577	1.44994	-1.18527	-1.459	1.31044	-0.250074
AIDA	-0.0878964	-0.143306	-0.697444	0.549547	0.577447	-0.103423	-0.377352	-0.478866	1.94257	-0.170627	0.0237122	2.44035	-0.927707	-1.25206	-0.177277	-1.11766
BROX	-0.760075	0.255436	0.882594	-0.197194	-0.809626	-0.0625762	-0.992707	-0.142944	-0.260191	0.490308	-0.610944	-0.268232	0.853588	2.7536	0.476118	-1.60716
FAM177B	-0.381992	-0.379414	-0.384974	-0.384974	-0.384974	-0.359764	-0.247624	-0.347651	2.09891	-0.304026	-0.374052	2.95769	-0.361305	-0.384974	-0.384974	-0.375894
AL392172.1	0.0198444	0.0947909	-1.01276	-1.09447	-0.0503253	0.0584323	0.27292	0.661179	3.00737	-0.183183	-0.0692031	0.422226	-1.0283	-1.09447	0.60349	-0.607549
TLR5	-0.449239	-0.458366	-0.0615428	-0.46545	-0.465144	-0.199997	-0.435098	0.0337715	-0.46545	0.207159	-0.46545	-0.46545	3.34056	1.27928	-0.46545	-0.464139
CAPN2	0.67683	1.29857	-0.963072	-1.05926	-0.950209	1.22533	-0.700262	1.1694	-0.248852	1.4419	-0.899734	-0.418022	-0.963402	-0.95077	1.25671	0.0848444
TP53BP2	-0.361232	0.777697	1.36585	0.309015	1.04431	0.202691	-0.933631	-1.0729	-0.888149	0.30157	0.582233	-0.899187	0.205556	1.51423	0.039458	-2.18751
FBXO28	0.409869	1.64263	-0.134144	0.330462	0.145326	0.366919	-0.307219	-0.714598	0.631057	0.292567	0.400816	0.241967	-1.753	-1.20982	1.55301	-1.89585
DEGS1	0.406073	0.224637	2.48545	-1.63875	-0.256261	-0.30511	-0.563254	-0.809324	0.410054	-0.374489	-0.464149	1.30418	0.808216	0.542828	-0.724712	-1.0454
NVL	0.525571	1.50628	-1.14204	-1.10178	0.944389	0.151401	0.374374	-0.760038	0.222104	-0.10085	0.464605	1.17421	-1.79397	-0.912977	1.34183	-0.893107
CNIH4	-0.43962	-0.180878	-0.0062032	-0.921735	-0.49959	1.07691	-0.567217	2.84857	-0.868436	1.2968	-0.618369	-0.609612	0.422817	0.123576	-0.267338	-0.789675
WDR26	-0.578692	-0.43755	0.753217	2.36	-0.693169	-0.467898	-0.673311	-0.306567	-0.625299	-0.0576048	-0.681876	-0.614647	1.72989	1.44621	-0.347792	-0.804917
DNAH14	-0.678363	-0.702202	-0.324528	-0.636639	0.757468	0.175648	1.31564	-0.617229	-0.52975	0.143831	2.86743	-0.784449	-0.456591	0.781854	-0.647224	-0.664901
LBR	-0.519339	-0.437329	2.22069	-0.732483	-0.250304	-0.0384099	-0.537905	-0.636557	-0.58509	-0.30874	-0.398636	-0.336555	1.8091	1.89754	-0.38281	-0.76318
SRP9	0.0821016	0.486231	0.641517	-2.1635	1.25402	0.593189	0.640803	-0.590133	-0.380223	-0.184762	1.57822	0.175982	-1.06639	-0.423897	0.852537	-1.49569
AL591895.1	0.113519	-0.361232	3.02077	-0.84168	-0.733128	-0.538725	-0.502429	-0.5481	-0.0670801	-0.475087	-0.61177	0.0182249	0.874838	1.30646	0.0918712	-0.746453
TMEM63A	0.159246	-0.13001	3.25405	-0.579801	-0.638099	-0.498937	-0.51798	-0.554721	-0.291544	-0.405479	-0.508015	-0.0419938	0.202101	1.31284	-0.0366408	-0.725009
PYCR2	0.312937	1.16703	-0.763477	-1.32151	0.852353	-0.124745	0.765157	-0.924568	0.426444	-0.390949	1.35375	0.113117	-1.23549	-1.30561	1.77044	-0.694873
SDE2	-0.213061	-0.00750072	-0.313271	3.61424	0.165647	-0.249078	-0.179946	-0.466539	-0.177931	-0.169488	0.0861678	-0.182503	-0.725372	-0.745925	0.0786284	-0.514072
H3F3A	-0.773096	-0.685147	0.796582	-0.884312	-0.123874	-0.179567	-0.385849	0.435951	-0.605631	0.0284135	-0.104941	-0.51824	2.30021	2.21958	-0.525667	-0.994407
ACBD3	-0.320415	0.0753076	0.21247	-1.9593	-0.685567	0.843949	-0.211662	-0.375008	0.57236	0.18562	0.347611	2.61822	-1.3279	-0.556938	0.11803	0.463232
MIXL1	-0.373319	-0.387872	-0.342747	-0.387872	-0.187422	-0.358773	1.5826	-0.387872	-0.293681	-0.359451	-0.262459	-0.387872	-0.387872	-0.387872	-0.357715	3.2802
LIN9	-0.209289	-0.0600384	-0.861844	-0.885515	2.01147	1.75333	1.04387	-0.367496	-0.604598	-0.590767	1.25542	-0.0615386	-1.06125	-1.11869	0.313838	-0.556905
PARP1	-0.111778	0.0934754	-1.17321	-1.19394	1.1535	0.181465	0.716972	-0.496424	1.24832	-0.614895	1.81521	1.27369	-1.23873	-1.2528	-0.114082	-0.286764
ITPKB	1.88546	1.68581	-0.0129267	-1.19278	-0.805491	-0.816377	-0.656471	-0.666757	0.232877	-0.705803	-0.619302	1.03518	0.0662129	0.276333	1.34241	-1.04837
COQ8A	-0.149027	0.022455	-1.33775	-1.38368	1.7066	-0.109528	1.31615	0.193013	0.228116	-0.0135831	0.82757	1.20115	-0.822663	-1.479	0.770466	-0.97029
CDC42BPA	-0.519518	-0.544751	-0.538909	0.750283	2.35591	-0.227231	0.23733	-0.47466	-0.557126	-0.110827	2.41327	-0.557126	-0.557126	-0.557126	-0.557126	-0.555267
ZNF678	0.367793	1.43015	-1.29809	-1.06731	0.614674	-0.0275461	0.857577	-0.918502	1.37099	0.0026046	0.734498	0.567287	-1.39271	-1.39271	0.91407	-0.762772
SNAP47	0.891757	2.23617	-0.913773	-1.07914	0.616658	-0.355073	1.08043	-0.291771	-0.222928	-0.0866771	0.234141	-0.709955	-1.15415	-1.17996	1.38067	-0.446404
JMJD4	0.459181	1.75754	-1.05686	-1.46708	1.36072	-0.244677	0.760016	-1.29547	0.478218	-0.574435	0.819873	0.352031	-1.40053	-0.772025	0.489973	0.333531
ARF1	-0.368803	1.2863	-0.555139	-1.00597	-0.551343	0.654273	-0.16334	1.72372	-0.622698	1.206	-0.597183	-1.12211	0.334297	-0.17044	1.4861	-1.53365
C1orf35	0.279529	0.878003	-1.05065	-1.53411	1.65529	0.993791	0.464548	0.513465	-0.0574318	-0.250745	0.737687	0.669491	-1.41856	-1.44992	0.56609	-0.996469
MRPL55	0.133913	0.0600151	-1.25073	-1.16922	2.02564	0.967932	0.19663	0.889391	0.143573	-0.016905	0.693192	-0.395498	-1.54355	-1.64751	0.510076	0.40304
GUK1	-0.0508392	0.8094	-0.660442	3.34111	-0.185336	-0.324055	-0.400865	0.443222	-0.539563	-0.140991	-0.54017	-0.768403	-0.640118	-0.61093	0.47637	-0.208393
IBA57	-0.179707	-0.12414	-0.59733	3.47393	0.190848	-0.241518	-0.0230684	-0.42822	-0.279725	-0.177646	0.0931733	0.616503	-0.789417	-0.723591	-0.0341091	-0.775982
OBSCN	1.79844	0.538314	-0.935253	1.28169	-0.0842944	-0.866557	1.82345	-0.902058	-0.119509	-0.38276	0.879956	0.375776	-0.965438	-0.965438	-0.612602	-0.863707
TRIM11	0.75179	1.50501	-0.165474	0.0773503	-0.0350281	-0.0746892	-0.479273	-0.382943	-0.44786	-0.14642	-0.145803	-0.0130657	-0.807475	-1.28363	2.80529	-1.15777
HIST3H2A	0.0116426	0.696819	-1.00283	-0.0809907	0.610677	-0.0792338	1.84727	-0.397977	-0.681909	-0.266184	1.86786	-0.986407	-1.04338	-1.04338	1.32922	-0.781181
RNF187	0.467723	1.35287	-1.37029	0.816809	1.33083	0.385594	0.456081	0.366092	-0.241939	-0.0389922	0.458169	-0.625856	-1.56772	-1.72863	0.978306	-1.03905
RHOU	-0.118025	0.303035	-0.135469	-0.594256	-0.580793	2.85475	-0.473208	0.297759	-0.594256	1.97129	-0.421364	-0.594256	-0.385257	-0.594256	-0.383911	-0.551786
RAB4A	0.71091	0.536087	-1.37021	-1.77027	0.630908	0.24541	1.40863	0.691668	0.135524	0.470095	0.95158	0.766598	-1.48294	-1.13649	0.215204	-1.0027
CCSAP	-0.188765	-0.488211	0.697935	-1.19044	-0.658234	2.08348	-0.84974	-0.274076	-0.83598	0.145524	-0.29249	-0.0918745	1.16385	2.05946	-0.538464	-0.741974
NUP133	0.61389	0.687671	-0.983071	-1.73484	1.54681	0.448767	0.639241	0.0226401	-0.0259523	0.17939	0.699707	0.649621	-1.40674	-1.33416	1.10929	-1.11226
ABCB10	-0.45787	-0.342819	-0.17461	2.99863	1.87704	0.203387	-0.36306	-0.341033	-0.483461	-0.186091	0.00163528	-0.496092	-0.644645	-0.674862	-0.330345	-0.58581
TAF5L	0.34311	0.735646	-0.522953	-0.920561	1.58937	1.25861	-0.344741	-0.4899	-0.220901	0.324214	1.12469	0.432818	-1.67838	-1.0572	0.947126	-1.52095
URB2	0.156893	-0.219634	-1.07083	-1.11291	1.69868	0.246209	0.0290302	-0.75348	0.176384	0.0683214	1.31634	2.14879	-1.01948	-1.11291	0.0494614	-0.600857
LINC01736	-0.459864	-0.473433	-0.380037	-0.473433	-0.473433	2.26303	-0.473433	1.47099	-0.473433	2.22862	-0.473433	-0.473433	-0.388405	-0.473433	-0.473433	-0.473433
GALNT2	-0.990429	-0.789623	-0.607402	-1.34879	0.457779	0.407891	1.31237	0.742663	-0.11033	1.11945	1.11642	1.70277	-0.853654	-1.34341	-0.782195	-0.0335191
COG2	0.413567	0.398664	-1.20937	-0.869562	0.328976	0.842801	-0.250179	-0.0360925	0.800315	0.364523	0.872501	0.825228	-1.66803	-1.52546	1.76856	-1.05644
TTC13	0.239739	1.86878	0.636657	-0.820059	-0.232966	-0.658408	-0.890211	-0.729913	-0.336833	-0.269815	-0.794944	-0.0813896	-0.364805	0.990893	2.39167	-0.948399
ARV1	-0.290267	-0.0916887	-0.787094	-0.554595	3.05238	-0.0415778	0.282641	-0.159736	-0.0876365	-0.167969	1.36637	0.187597	-1.03812	-1.12775	-0.0249456	-0.5176
FAM89A	0.0455933	-0.07222	-0.757503	-0.896343	2.6089	-0.0710728	-0.0587136	0.145169	-0.577385	0.377322	2.13607	-0.519705	-0.552812	-0.707786	-0.376763	-0.722754
C1orf131	-0.205203	0.21151	-0.964323	-1.32747	0.886151	0.423387	0.0159413	0.106172	0.623382	0.0107055	0.914516	1.68205	-1.32568	-1.18164	1.48448	-1.35398
GNPAT	0.311245	0.790929	-0.565881	-1.92071	0.380403	0.830776	0.898592	1.01673	0.12234	-0.117353	0.256507	0.67273	-1.39791	-0.587186	1.15559	-1.84681
EXOC8	0.629399	1.47478	1.18401	-0.955398	-0.544619	-0.818938	-0.611521	-0.848991	-0.0344313	-0.372292	-0.915054	1.74345	0.837748	-0.572039	1.12408	-1.32018
SPRTN	0.58713	1.24978	-0.698688	-0.631999	0.288065	-0.162274	-0.0460721	-0.350788	0.234438	-0.34314	0.319833	-0.229212	-0.86476	-1.33348	2.88204	-0.900873
EGLN1	-0.321231	-0.192907	0.675542	-0.715852	-0.541316	-0.278479	-0.486341	-0.361535	-0.433603	-0.293053	-0.571623	-0.494337	2.81376	2.00272	-0.229872	-0.571867
AL445524.1	-0.550094	-0.630965	0.458877	-0.56424	-0.529323	0.13093	-0.603541	0.558632	-0.544229	0.0193472	-0.583147	-0.560537	2.89887	1.66294	-0.590418	-0.573102
TSNAX	-0.649191	-0.463435	1.77813	-0.981263	-0.836833	0.617838	-0.556404	-0.537835	-0.850926	0.381108	0.032621	-0.172206	0.913645	2.30201	0.23483	-1.21208
DISC1	2.13454	0.845196	-0.800517	-1.17727	-1.10294	0.380373	0.0780627	-0.114522	-0.966101	0.712152	-0.52628	-0.684812	1.46832	0.702717	0.245173	-1.1941
SIPA1L2	-0.450813	-0.457404	0.758911	-0.494685	-0.49329	-0.313459	-0.485475	-0.28725	-0.494685	-0.227697	-0.479196	-0.494685	2.46077	2.41345	-0.460969	-0.493525
NTPCR	-0.0282184	0.182767	-1.12698	-1.36497	0.56851	0.947088	1.91238	0.573786	0.0443589	0.347498	1.22335	0.243671	-1.30301	-1.46196	0.262984	-1.02127
PCNX2	2.21638	2.56498	-0.62935	-0.412259	-0.745747	-0.364936	0.141528	-0.236071	0.49506	-0.337151	-0.587327	0.120956	-0.76173	-0.547373	-0.176688	-0.740275
COA6-AS1	0.687856	1.24977	-0.93378	-0.896695	-0.72803	0.593234	-0.231196	0.648163	0.258645	0.103041	-0.604492	2.28773	-1.09047	-1.40869	0.767696	-0.702782
COA6	0.384211	0.121893	-1.16765	-1.46542	0.648677	1.0221	0.499426	1.50494	-0.537487	1.25248	0.579578	0.263908	-1.29317	-1.57178	0.554338	-0.79604
TARBP1	-0.038752	-0.190996	-0.957928	-0.922448	0.980102	0.362661	1.70284	-0.605629	-0.169053	0.476668	2.32224	0.229321	-0.958399	-1.12952	-0.142414	-0.958695
IRF2BP2	-0.635296	-0.742328	2.32947	-0.733145	-0.391533	1.97357	0.472982	-0.28995	-0.526785	0.420593	0.901842	-0.834746	-0.347632	0.129612	-0.605921	-1.12074
AL391832.2	-0.496279	-0.508438	0.900044	-0.508438	-0.506252	-0.114909	-0.444877	-0.4007	-0.508438	-0.165427	-0.479757	-0.508438	2.06925	2.68824	-0.508438	-0.507137
AL391832.3	-0.491822	-0.491822	0.444541	-0.491822	-0.491822	-0.0474685	-0.402529	-0.27739	-0.491822	-0.255019	-0.49014	-0.491822	2.42149	2.54109	-0.491822	-0.491822
TOMM20	0.910317	0.196616	-1.15647	-1.26285	0.987637	0.043376	0.915483	0.182467	0.584732	0.317064	1.92154	0.446229	-1.41325	-1.44217	-0.312553	-0.918172
ARID4B	0.324662	0.964123	0.794485	-0.625983	-1.19279	-0.678441	-0.469994	-0.862736	-0.0347602	-0.34164	-0.379367	-0.0849265	1.4751	1.62294	1.30743	-1.8181
GGPS1	0.64421	0.0903811	1.62002	-0.98832	-1.45092	0.793063	0.065633	-0.648218	0.441014	0.930358	1.068	-0.726648	0.0100769	-0.395168	0.66532	-2.11881
TBCE	0.708912	0.361333	0.580411	-1.69855	-0.98558	-0.318785	0.559003	-1.43148	0.845746	0.307478	1.03424	1.73713	-0.398671	-0.381562	0.561419	-1.48104
B3GALNT2	-0.238397	-0.0214554	-1.15647	-0.923224	0.643027	1.89097	0.050662	0.299859	-0.964342	1.16566	1.5926	0.271822	-1.01717	-1.65102	0.0997332	-0.0422457
LYST	-0.728686	-0.446406	1.63618	-0.747671	-0.818409	0.65062	-0.803921	-0.295344	-0.392568	0.0913847	-0.792341	-0.0188291	1.62313	2.22146	-0.313252	-0.86535
GPR137B	0.201176	2.45347	-0.689894	-0.713476	-0.576247	-0.368038	-0.299673	2.12879	-0.432015	0.910061	-0.51978	-0.329367	-0.713476	-0.713476	0.27661	-0.614668
ERO1B	0.427247	1.29829	-0.997957	-1.633	-1.15876	-0.456937	0.450106	0.2163	0.699124	0.0127114	-0.142382	2.17183	-0.867821	-1.01861	0.775442	0.224412
LGALS8	0.321215	0.408979	0.971776	-1.658	-0.269702	0.350933	0.117463	0.404663	-0.444676	1.50359	0.366228	-1.58249	1.02734	0.388235	0.175093	-2.08065
HEATR1	0.277108	0.515842	-0.93936	-1.11196	1.53286	0.901363	0.227751	-0.642568	0.158788	-0.106908	2.19232	0.261219	-1.39925	-1.12818	0.128719	-0.867752
MTR	0.55496	0.717041	-1.11169	-1.19508	0.706053	0.568728	0.757842	-0.730561	-0.137615	0.168846	2.09379	0.942129	-1.2917	-1.30666	0.187844	-0.923919
CHRM3	-0.356825	-0.397563	-0.397563	-0.227238	-0.0883465	-0.343594	3.55974	-0.397563	-0.397563	0.335518	0.698813	-0.397563	-0.397563	-0.397563	-0.397563	-0.397563
CHRM3-AS2	0.848654	-0.0818543	-0.511698	-0.487686	0.434724	-0.516784	0.430342	-0.533504	-0.469365	-0.178756	3.3825	-0.533504	-0.508119	-0.533504	-0.20993	-0.531509
FH	-0.314884	-0.200955	-1.13311	-1.21698	2.34945	0.725139	0.498022	0.407992	0.0908144	-0.140917	1.47215	0.380753	-1.26951	-1.26951	-0.193624	-0.184815
KMO	-0.481554	-0.497796	-0.515461	-0.60948	-0.415762	-0.0148672	-0.0440435	0.0556147	1.45565	0.14298	-0.539404	3.23618	-0.430513	-0.492746	-0.506405	-0.342397
OPN3	-0.646033	-0.792036	-0.451602	-0.727451	-0.318758	0.940323	0.250455	-0.0790306	1.67989	0.405715	0.317158	2.53358	-1.06064	-0.385884	-0.836604	-0.829082
CHML	-0.58318	-0.878919	0.0621652	-1.06795	0.100857	1.83877	-0.00460589	-0.56698	0.182247	0.67616	1.56517	1.84531	-0.865386	-0.865751	-0.442588	-0.995315
EXO1	-0.519903	-0.588558	-0.447954	-0.588558	2.82838	1.41732	-0.272545	-0.588558	-0.393941	-0.356405	1.47778	-0.588558	-0.588558	-0.109811	-0.29094	-0.389193
CEP170	-1.0092	-1.11115	0.569455	-1.54464	-0.546536	0.317196	0.399126	0.141425	0.0985784	0.991955	0.501407	1.28603	1.03586	1.45234	-1.14287	-1.43896
SDCCAG8	-0.458072	-0.444145	-0.116381	-1.33247	-0.409664	0.325136	2.68848	0.357458	0.719647	1.12322	0.742169	0.121921	-0.726171	-0.696133	-0.842496	-1.05249
AKT3	1.54177	1.82235	-0.807691	-0.858582	-0.709695	-0.575729	0.230297	-0.698173	0.677422	-0.236835	-0.190909	0.348334	-0.809855	-0.858582	1.94808	-0.822204
ZBTB18	-0.465983	-0.637221	1.06755	-0.771739	-0.590047	-0.274805	-0.543194	-0.479893	0.00282002	-0.0864224	-0.490511	0.234429	1.71318	2.73073	-0.653935	-0.754968
ADSS	-0.218098	-0.0827589	3.66634	-0.645374	-0.279251	0.0156132	-0.267391	0.032003	-0.29937	-0.0809075	-0.0369815	-0.264157	-0.516923	-0.381638	-0.0461782	-0.594932
DESI2	-0.0179774	0.2836	-0.817333	-0.865778	0.286859	0.681397	0.163717	-0.0780895	0.0412551	0.219371	1.06431	-0.564056	-1.39124	-1.29791	2.7545	-0.462613
COX20	-0.0438241	-0.0470881	-1.2388	-0.85746	0.739235	1.46955	1.20402	0.375389	0.636467	0.09603	0.959094	0.748172	-1.55884	-1.52953	0.333871	-1.2863
HNRNPU	-0.508204	-0.65727	1.69771	-1.60074	0.164865	1.6628	-0.211217	-0.69381	-0.427329	0.283332	1.11769	-0.342404	0.526671	0.793798	-0.0724211	-1.73348
EFCAB2	-0.0549519	-0.6115	-0.859648	-1.13142	0.41498	1.84713	1.46195	0.112624	-0.0642296	0.581939	1.66079	-0.740347	-0.859929	-1.2633	0.370713	-0.864799
SMYD3	0.213014	0.788179	-0.93779	-1.14269	0.460056	-0.414579	1.41845	-0.698607	0.235611	-0.535522	1.24195	-0.344026	-0.891485	-1.22291	2.19895	-0.368601
TFB2M	-0.0160896	0.44843	-1.03915	-1.00459	1.80786	0.485962	0.841736	-0.876237	0.0641866	-0.242716	2.03019	-0.643609	-1.0948	-1.21627	0.644925	-0.189834
CNST	0.863785	-0.0209612	-0.825839	-1.09895	0.260304	-0.607085	1.86932	-0.450615	0.394138	-0.259696	0.775375	1.97082	-1.07449	-1.08016	0.329154	-1.04511
SCCPDH	-0.58154	-0.441136	-0.547631	-0.797661	2.1859	0.576314	1.3921	-0.250283	-0.663307	-0.0569552	2.02352	-0.68787	-0.755248	-0.52082	-0.134071	-0.741308
AHCTF1	-0.200902	-0.204425	0.390696	-0.825825	-0.336805	-0.287981	-0.381548	-0.515705	-0.334711	-0.365086	-0.123922	-0.769695	2.51985	2.38087	-0.191611	-0.753201
ZNF669	0.0933804	0.698602	0.22118	-1.07386	-0.398073	-0.484898	0.0915375	-0.311352	0.697819	-0.314322	-0.054943	2.63249	-0.403694	-1.34457	1.26209	-1.3114
ZNF124	-0.0437325	0.213828	-1.19458	-1.60506	0.252777	0.765537	0.929827	0.587504	0.0561864	0.634195	1.57893	1.35449	-1.35174	-1.05073	0.0646228	-1.19206
AL390728.6	-0.449459	0.775485	0.966504	-1.42667	-1.25305	-0.119195	-0.279545	-0.321383	0.0437775	-0.189763	0.0078644	1.78746	-0.148991	-0.205829	2.11424	-1.30144
AL390728.4	0.369701	1.49863	1.24763	-1.30165	-0.968207	-0.600931	-0.346121	-1.03668	0.167679	-0.431056	-0.579853	0.324229	0.213826	0.612771	2.06616	-1.23613
ZNF496	0.0248863	0.28737	-0.974053	-1.05487	0.604556	0.144267	2.09776	-0.263524	-0.637107	0.0451774	1.51275	-0.774001	-0.852838	-1.05487	1.55706	-0.66256
NLRP3	-0.37883	-0.575413	-0.529563	-0.656964	-0.617489	1.52445	-0.248478	1.97427	-0.623988	1.96638	-0.539275	-0.656964	1.08309	-0.555331	-0.515661	-0.650237
GCSAML	-0.379902	-0.399038	-0.412411	-0.419665	0.0972836	-0.405733	2.87865	-0.419665	-0.419665	-0.226396	2.15516	-0.419665	-0.369952	-0.419665	-0.419665	-0.419665
TRIM58	-0.290896	-0.294174	-0.290098	3.73809	-0.0533885	-0.26613	-0.130738	-0.288016	-0.289941	-0.270406	-0.0957978	-0.294915	-0.294244	-0.294915	-0.290888	-0.293539
SH3BP5L	-0.694824	-0.347542	1.45278	-0.971404	-0.452056	-0.277319	-0.89392	0.17588	-0.596047	-0.184245	-0.250005	-0.366516	2.05101	2.12076	0.185416	-0.95197
ZNF672	-0.408174	0.385123	-0.677005	-2.53258	0.678679	1.18011	0.0578143	0.859101	1.14741	0.0282616	0.216007	-0.27481	-0.322676	0.782891	0.543148	-1.66329
ZNF692	0.778035	0.498941	-1.3485	-2.41162	1.08254	-0.0703163	0.697531	0.250944	0.317261	-1.00559	1.25943	-0.0494955	-0.180938	0.294414	0.933315	-1.04595
PGBD2	1.54291	1.21411	-0.865696	-1.30222	0.679977	-0.476839	0.43367	-0.793127	0.292294	-0.441867	0.387134	-0.289314	-0.43468	-0.988809	2.09746	-1.055
SH3YL1	2.86987	0.39145	-0.516778	-1.04501	-0.565361	-0.177422	0.650215	-0.720847	0.619634	-0.0420708	-0.170897	0.384696	-0.952593	-1.04501	0.979933	-0.659806
ACP1	-0.0640587	0.4124	-1.37429	2.24146	0.940402	-0.0354238	0.486198	-0.366939	0.0781855	-0.509377	0.510638	0.292909	-1.54414	-1.62661	0.934297	-0.375646
TMEM18	0.00252196	-0.104106	-1.16659	-1.35137	0.99424	0.152621	1.64392	0.396697	0.310117	-0.100221	1.40926	1.20954	-1.37604	-1.28035	0.162998	-0.903232
EIPR1	0.535893	0.738808	-0.732349	-1.6155	0.9985	1.47035	0.474882	-0.22933	0.416587	0.0815426	1.15142	-0.239882	-1.37574	-1.75689	0.761135	-0.679422
TRAPPC12	0.682961	2.00301	-0.11023	-2.24902	0.553252	-0.193014	0.44829	0.0428226	0.271998	0.685858	-0.0871907	-0.816128	-0.952853	0.0738285	0.987506	-1.3411
ADI1	-0.0674452	-0.772903	-0.542378	-1.5868	0.88024	1.42	0.685907	1.29943	-0.49822	0.613173	1.31169	-0.737465	-1.30294	-1.22956	-0.182853	0.710129
RNASEH1	0.0680504	0.8421	-1.18058	-1.53154	0.78374	0.783775	0.00776725	-0.140367	0.338187	0.093064	1.38812	1.01134	-1.57623	-1.5771	1.05765	-0.36797
RNASEH1-AS1	-0.0010779	-0.251714	-0.870761	-1.00549	-0.174844	0.0727548	0.245334	-0.531874	1.44646	-0.631839	1.06427	2.60978	-0.72146	-1.00549	0.507301	-0.751346
RPS7	0.62342	0.338409	-1.34043	-1.34761	1.00997	0.331717	1.49981	0.433882	0.761984	-0.130825	0.869453	0.990236	-1.42829	-1.41708	-0.26544	-0.929213
CMPK2	-0.291514	-0.444208	-0.615654	3.3225	1.0208	-0.101695	0.235935	-0.462568	-0.402102	-0.211363	0.559389	-0.516139	-0.587208	-0.6295	-0.255823	-0.620846
RSAD2	-0.255452	-0.264735	-0.386143	3.71169	-0.177544	-0.324291	0.191603	-0.267325	-0.261195	-0.21655	-0.147454	-0.199444	-0.397974	-0.397974	-0.213325	-0.393886
RNF144A	1.57877	0.718263	0.829177	-1.21631	1.11705	0.242348	1.48113	-0.944019	-0.795672	-0.446813	0.354435	-1.04925	-0.754445	-0.814774	0.87374	-1.17364
LINC01871	1.14063	3.37072	-0.380121	-0.398828	-0.395361	-0.392711	-0.393437	-0.387031	-0.364836	-0.390031	-0.398828	-0.398828	-0.398828	-0.398828	0.58291	-0.396591
LINC00299	-0.252719	-0.00571202	-0.188818	-0.285426	-0.27736	-0.212712	-0.268995	-0.285426	-0.285426	-0.259205	-0.285426	-0.285426	-0.285426	-0.285426	3.74055	-0.277047
ID2	0.547641	1.31554	0.0237807	-0.274397	-0.59386	0.0436567	-0.673152	0.145073	-0.88089	0.430798	-0.705216	-0.89299	-0.243264	-0.385987	2.9826	-0.839326
KIDINS220	-0.625221	-0.462053	2.00093	0.226683	-0.596844	-0.265384	-0.620152	-0.506357	-0.715072	-0.0311614	-0.420004	-0.611069	1.46216	2.23575	-0.0363591	-1.03584
MBOAT2	-0.760954	-0.771526	2.02198	0.977924	1.36431	-0.49773	-0.499582	-0.793245	-0.769336	-0.644826	0.449228	-0.793245	0.792585	1.4633	-0.749018	-0.789862
ITGB1BP1	0.0648426	0.956559	-1.07614	-1.456	0.451504	0.883644	0.650339	0.955894	-0.194165	0.206118	0.554501	-0.418927	-1.34509	-0.883954	1.92478	-1.27391
CPSF3	-0.616189	0.0116475	0.987033	-1.69078	1.34854	1.6255	0.499861	-0.209169	-0.305699	0.281257	1.42678	-0.31203	-1.35477	-0.925988	0.225659	-0.991652
IAH1	0.411196	0.973236	-1.174	-1.70787	0.353998	0.20948	0.484013	0.54409	0.562824	0.485862	-0.183877	1.45124	-1.31373	-1.1725	1.28157	-1.20554
ADAM17	-0.74668	-0.262422	0.763343	-1.41467	-1.01504	-0.129612	-0.675414	0.490788	0.0300472	1.00453	-0.598042	0.140331	1.89947	1.8726	-0.122941	-1.23629
YWHAQ	0.486639	0.914716	-1.20417	-1.25716	1.58555	0.95781	0.729249	-0.317107	-0.297885	-0.333879	1.15053	0.0491541	-1.2848	-1.36932	1.03395	-0.843281
TAF1B	0.258248	1.36798	-1.09238	-1.21785	1.32977	0.293074	-0.0157224	-0.229423	-0.14103	0.208297	1.52559	-0.249137	-1.31158	-1.31158	1.39142	-0.805686
GRHL1	-0.275937	-0.289779	-0.136576	3.73623	0.0173436	-0.272897	-0.311229	-0.311229	-0.311229	-0.267741	-0.257353	-0.311229	-0.189856	-0.311229	-0.247521	-0.259772
KLF11	-0.0516561	-0.292645	-0.861468	-0.994331	0.198362	-0.146703	-0.192556	2.20663	0.0429901	2.25817	0.74878	-0.478752	-0.833888	-0.994331	0.171832	-0.780431
RRM2	-0.549792	-0.611806	-0.167378	-0.557055	1.9358	2.803	-0.343748	-0.61573	-0.555864	-0.45951	0.395815	-0.611306	-0.591336	-0.52833	0.452026	0.00521163
HPCAL1	0.624409	0.306367	-0.684787	-1.33494	-1.37691	0.0887935	-0.124179	1.45966	0.102045	0.841346	-0.98013	-0.589457	1.29347	0.344999	1.49731	-1.468
ODC1	0.139756	0.522431	-1.19827	0.832125	2.18933	-0.167125	-0.28601	-0.799272	0.959937	-0.862612	1.02079	0.564775	-1.27225	-1.26883	-0.784113	0.409332
NOL10	0.363163	0.0325241	-0.652262	-0.965186	1.62947	0.881951	0.372499	-0.660969	-0.265469	0.402699	2.36175	-0.66174	-1.22711	-1.12784	0.181507	-0.664993
PDIA6	-0.462417	-0.16639	-1.10947	-1.13834	0.545493	1.57253	0.56747	-0.293445	-0.330204	0.12699	1.41498	-0.574762	-1.16971	-1.08023	0.0842234	2.01328
PQLC3	0.33705	0.993616	-0.914993	-1.1254	-0.746145	0.500419	0.398839	2.32044	-0.529134	1.27581	-0.652064	-0.00338566	-1.1254	-1.1254	0.698118	-0.302384
ROCK2	-0.496516	-0.000838086	0.443986	-1.70154	0.892076	1.12668	-0.505122	-0.762541	-0.400863	0.601089	2.04913	-0.736963	-0.184106	0.26014	0.977096	-1.56171
LINC00570	-0.260259	-0.26241	-0.260349	3.7467	-0.0933767	-0.26241	-0.259539	-0.26241	-0.26241	-0.26241	-0.249081	-0.26241	-0.26241	-0.26241	-0.26241	-0.26241
LPIN1	1.01839	1.77658	-0.999948	-0.954074	-0.687272	-0.406037	1.39242	-0.38712	0.260215	-0.122704	-0.160491	-0.253859	-1.01487	-1.0467	1.93624	-0.350771
TRIB2	0.971112	0.240224	-0.681818	-0.820529	0.783913	-0.801887	-0.420061	-0.798639	0.0236399	-0.707619	2.33052	0.307336	-0.848413	-0.746921	1.76801	-0.598872
NBAS	-0.070111	0.0405176	-0.625643	-0.233772	2.24711	-0.278999	0.377354	-0.478115	-0.238504	-0.043718	2.28565	0.369557	-1.21309	-1.29863	-0.175933	-0.66367
DDX1	-0.0829248	-0.116214	-0.797027	-0.713798	2.04378	0.501959	0.321593	-0.160013	-0.285849	-0.149242	2.46153	-0.185736	-1.14362	-1.20702	0.069069	-0.556494
MYCN	-0.36356	-0.384832	-0.384832	-0.384832	0.0449969	-0.370751	3.49954	-0.384832	-0.384832	0.00717792	1.00859	-0.384832	-0.384832	-0.384832	-0.384832	-0.362508
FAM49A	-0.959092	-0.134484	-0.265445	-0.901845	-1.00493	-0.580641	-0.905611	2.04446	0.151037	1.10785	-0.990105	-0.268082	1.51332	1.17772	0.66049	-0.644645
SMC6	-0.435122	-0.233431	-0.347597	-1.3475	0.739724	0.436312	-0.469289	-0.674138	1.53018	-0.389472	0.481041	2.59941	-0.950434	0.0117003	0.0580844	-1.00947
GEN1	-0.773207	-0.526375	-0.350432	-1.1298	1.25088	2.64544	-0.180714	-0.591623	0.702405	0.0927202	1.2141	-0.254291	-0.85828	-0.894053	0.0943268	-0.441095
RDH14	0.768409	1.31639	-1.28053	-0.816394	0.36837	-0.494918	0.294164	-0.650853	1.05541	-0.496969	0.881189	1.58692	-1.40087	-1.40087	0.791967	-0.521396
TTC32	0.795215	0.771925	0.115602	-0.653504	0.379825	-1.11288	1.15618	-1.09604	0.486487	-0.856857	0.21268	-0.347689	-0.476708	1.25014	1.46102	-2.08539
LAPTM4A	-0.454717	-0.0863804	-0.89189	-1.88206	-0.100456	-0.444546	2.01623	1.35584	-0.181837	1.88173	0.182928	0.0978302	-0.180037	-0.343528	-0.708098	-0.261014
SDC1	-0.260954	-0.211968	-0.250313	-0.26532	-0.243709	-0.25446	-0.242215	-0.26532	-0.26532	-0.242941	-0.26532	-0.232515	-0.234928	-0.26532	-0.248969	3.74957
PUM2	0.195485	0.474364	0.756063	-0.55492	-0.711973	0.26441	-0.520994	-1.41628	-0.486719	0.218703	0.557227	-0.227705	0.155722	1.79478	1.61994	-2.1181
RHOB	-0.682865	-0.234668	0.703687	-1.08151	-0.903341	-0.184496	-0.782409	1.24389	-0.203864	0.300789	-0.846752	-0.718356	2.64971	1.07248	0.160071	-0.492369
HS1BP3	-0.0685364	0.515829	-0.0301578	-1.85171	-0.683938	0.175502	0.905637	0.73961	0.262143	1.33617	-0.734148	1.74627	-0.5573	-1.20646	0.743986	-1.29289
LDAH	0.43736	0.344071	-1.2037	-1.10634	1.36114	0.402325	1.149	-1.09347	0.481875	-0.234503	1.65159	0.541509	-1.38414	-1.38414	0.434895	-0.397478
ATAD2B	-0.445594	0.595657	1.56074	-0.343175	-0.709289	0.634046	-0.630684	-0.51352	-0.119269	0.589147	-0.0494791	0.166111	-0.67816	0.632154	1.75784	-2.44653
UBXN2A	0.40414	0.285541	-0.852286	-1.72494	0.389809	0.671859	0.478238	0.167141	-0.212045	0.540792	1.60688	0.894453	-0.99988	-1.62553	1.17774	-1.20191
MFSD2B	-0.44803	-0.436372	-0.450396	2.71914	2.23945	-0.447883	-0.250443	-0.417129	-0.457318	-0.428204	0.505235	-0.457318	-0.364701	-0.457318	-0.407054	-0.44166
SF3B6	-0.512876	-0.210758	-0.286065	-1.96444	1.81934	0.620814	0.948373	0.780025	-0.585061	-0.0431119	1.56588	-0.15269	-0.386795	-0.237787	0.218398	-1.57324
FAM228B	-0.37755	0.0688522	0.296953	-1.52682	-0.731525	-0.100416	2.45642	0.0522342	-1.06487	0.191877	0.244427	-0.210486	1.31594	0.576396	0.353733	-1.54517
TP53I3	-0.663018	-0.677389	2.95144	-0.68235	-0.0251474	-0.366191	-0.112755	-0.0633407	-0.602023	-0.0826123	-0.236613	-0.569698	0.391484	1.81081	-0.626243	-0.446353
ITSN2	-0.247213	0.146029	1.76776	-1.35683	-1.07417	-0.572111	-0.459503	-0.419933	0.650269	-0.0990845	-0.716293	0.40994	1.22491	1.91426	0.165062	-1.33309
NCOA1	-0.433437	-0.209667	0.345235	-0.89159	-0.758458	-0.475054	-0.544377	-0.388785	-0.405097	-0.101872	-0.356516	-0.160254	2.64706	1.96372	0.717784	-0.948691
PTRHD1	-0.528871	-0.194361	-1.14142	-1.0651	1.09934	1.49634	0.72183	1.58652	-0.152549	0.623899	1.19698	-0.0595236	-1.24289	-1.1952	-0.197031	-0.947955
CENPO	-0.59134	0.0836079	-0.629914	-0.919984	2.17752	1.8464	-0.232988	-0.634161	-0.550961	-0.350222	1.49748	0.141979	-0.850684	-0.919984	0.482309	-0.549056
ADCY3	0.148096	-0.0959649	-0.939996	-1.59224	-0.938311	1.53996	2.27906	-0.362531	-0.429799	1.18946	-0.139315	0.0352269	0.441052	0.110325	-0.192034	-1.053
POMC	-0.362702	0.824582	-1.46618	-0.0740172	0.930078	-0.330346	0.776019	-0.624829	-0.202578	-0.589949	1.30984	-0.363493	-1.46847	-0.198635	2.32387	-0.483186
DNMT3A	1.21387	0.0751782	-0.689396	-1.41454	-0.131112	-0.321468	1.67566	-1.2014	-0.620054	-0.0991435	1.5518	-0.865374	0.127376	0.0107128	1.5416	-0.853723
AC104699.1	-0.272415	-0.29698	-0.284105	-0.29698	-0.244131	-0.29698	-0.29698	-0.29698	0.350065	-0.29698	-0.281221	-0.29698	-0.29698	-0.29698	-0.29698	3.7016
ASXL2	0.710703	2.09599	1.24396	-1.48276	-0.329218	-0.414782	-0.859018	-0.869314	0.086599	-0.528839	-0.202197	-0.362422	0.194206	1.34636	0.703678	-1.33293
KIF3C	-0.471681	-0.384022	2.01164	-0.618748	-0.483545	-0.507735	-0.329488	-0.551535	-0.526828	-0.458496	-0.148741	-0.618748	2.08792	1.90319	-0.535243	-0.367939
RAB10	-0.888276	-0.650097	1.89147	0.293416	-0.204279	-0.328215	-0.65719	0.330576	-0.794169	0.781848	0.164493	-0.863031	1.00896	2.01133	-0.767152	-1.32969
HADHA	0.00369566	-0.421405	-1.10672	-0.250651	2.13033	0.952154	1.07921	0.733048	-0.224175	0.715526	1.03077	-0.709451	-1.15843	-1.07568	-0.449909	-1.24831
HADHB	-0.658897	-0.449722	-0.766908	1.08127	1.2959	0.565254	1.1263	1.1849	-0.629954	1.04894	0.577315	-0.138302	-0.963631	-1.08841	-0.201203	-1.98285
SELENOI	0.337669	0.267927	-0.645925	-1.37415	0.801581	0.329161	0.0436472	-0.767756	0.18022	-0.0287672	1.11424	2.48578	-1.3155	-1.37415	0.18778	-0.241749
DRC1	-0.454517	-0.397331	2.5894	-0.464325	-0.419786	-0.444487	-0.464325	-0.464325	-0.464325	-0.44547	-0.441752	-0.464325	1.20055	2.05453	-0.464325	-0.455184
SLC35F6	0.15629	0.864612	-0.0285759	-1.24263	-1.13582	0.357735	-0.552177	1.30625	-0.738013	1.31411	-0.91941	-1.00823	-0.350671	1.29618	1.58234	-0.901986
CENPA	-0.490843	-0.578481	-0.520672	-0.653919	1.15756	2.62916	-0.106963	-0.525446	-0.605335	-0.559908	1.00368	-0.653919	-0.611134	-0.653919	1.47533	-0.305192
TMEM214	-0.225664	0.661141	-0.698089	-1.21441	0.261277	1.21566	0.0460914	0.241081	-0.272976	0.0884813	0.322187	-1.00973	-1.38826	-1.39832	1.3928	1.97873
AGBL5	-0.0251319	0.288096	-0.485799	-1.00554	2.06947	0.559894	1.30543	-0.658212	-0.307385	-0.35859	1.99897	-0.477843	-1.00554	-1.00554	-0.261674	-0.630626
OST4	1.09312	1.32066	-1.28176	-1.42226	0.436383	0.242967	0.288432	1.1212	0.152665	0.0991309	0.354415	0.281346	-1.94468	-1.55182	0.24795	0.562259
PREB	0.457938	1.13579	-0.734804	-1.49194	0.418186	0.184688	0.153609	0.148711	0.0573131	-0.137568	-0.320233	-0.655122	-1.16107	-1.50759	1.30985	2.14224
SLC5A6	0.233506	-0.0293613	-0.806255	-0.99518	1.78478	1.26769	0.757498	-0.494127	0.370168	0.0247938	1.89428	-0.291639	-1.1828	-1.28032	-0.45407	-0.798962
ATRAID	0.354331	0.985597	-1.2894	-1.68564	-0.0497804	0.191252	0.908483	0.738571	0.0375087	0.393893	0.35125	0.907977	-1.66474	-1.7036	0.604827	0.919474
CAD	-0.0490983	-0.451678	-0.757926	-1.05834	2.16946	0.950378	0.469042	-0.551791	-0.143271	-0.274352	2.22355	0.0308577	-0.920679	-0.891714	-0.327704	-0.416742
MPV17	-0.00888385	0.151709	-1.29026	-1.47046	0.945594	0.396058	1.40924	0.659525	-0.46458	0.328657	1.10984	0.653482	-1.47357	-1.418	1.07306	-0.60141
GTF3C2	0.762101	0.918842	-0.905081	-1.0163	1.08504	1.02973	0.249069	0.819758	0.4623	0.114995	0.389481	0.518651	-1.7884	-1.90665	0.340627	-1.07416
EIF2B4	0.507267	0.921932	-0.3764	-1.56487	0.458767	0.504862	0.139348	0.570341	-0.441097	0.698384	0.502668	0.288797	-1.71484	-1.84867	1.72546	-0.37195
SNX17	0.140847	0.687348	-0.538142	-1.70214	-0.0428669	1.45799	0.370204	1.60916	0.0329278	1.20386	-0.127959	-0.281395	-1.51628	-1.27188	0.69765	-0.719322
PPM1G	-0.121294	0.15384	-0.902035	-1.32605	1.83501	1.48404	0.174318	0.248085	-0.201191	-0.0812291	1.46228	-0.0682536	-1.30721	-1.27704	0.736569	-0.809832
NRBP1	0.3302	1.82569	1.70729	-0.597356	-0.300846	-0.278691	-0.808385	0.327059	-0.825547	-0.532191	-0.368469	-0.535369	-0.570515	1.15915	1.17618	-1.70819
ZNF512	0.6615	0.684	0.12174	-1.60906	0.0962129	0.0187984	1.09128	-0.221167	-0.466897	-0.408164	1.6826	1.26475	-1.35002	-1.16537	0.840386	-1.24058
GPN1	0.327614	1.67884	-0.952648	-1.33749	0.912257	0.739243	0.54046	-0.160469	0.7194	0.181231	0.709986	-0.457302	-1.44395	-1.55904	1.02479	-0.92293
SUPT7L	0.766333	1.55687	-0.111175	-1.57969	0.950167	0.160438	0.268071	0.100048	-0.392898	-0.105298	0.385821	0.300762	-1.09239	-1.70101	1.63571	-1.14176
SLC4A1AP	-0.23625	0.516303	1.82966	-1.68718	-0.52125	-0.18464	-0.516494	0.400467	-0.423032	-0.154347	-0.678532	0.0910728	1.12212	1.41679	0.804455	-1.77914
MRPL33	0.064659	0.132579	-0.640985	-1.58947	-0.55022	2.83009	-0.151451	1.07954	-0.182885	0.640737	0.153479	0.0438085	-0.610016	-0.563196	0.435232	-1.0919
BABAM2	0.496488	2.21159	-0.582689	-1.67709	0.0939798	0.110478	0.503672	0.424274	-0.0228765	0.1662	0.32425	-0.881343	-0.775102	-0.718956	1.60826	-1.28112
FOSL2	-0.376081	0.15223	0.405492	-0.971974	-0.936604	0.350697	-0.454825	-0.156487	-0.902629	0.332782	-0.73722	-0.934831	2.17855	1.56875	1.43029	-0.948143
AC104695.4	-0.369772	-0.660386	0.915087	-0.92321	-0.917504	0.140219	-0.146641	0.108249	-0.92321	0.418511	-0.634411	-0.92321	1.37889	2.42898	0.990502	-0.882098
PLB1	-0.344807	-0.469504	0.662647	-0.825729	-0.805636	0.116421	-0.177224	0.600465	-0.74201	0.683109	-0.666661	-0.825729	3.00734	0.79596	-0.225606	-0.783037
PPP1CB	-0.264566	-0.430198	0.916001	0.00135718	-0.796561	0.589073	-0.428318	-0.666378	-0.528157	0.873543	0.235062	-0.768674	2.12462	1.43	-0.296337	-1.99047
TRMT61B	0.473223	1.1289	-1.31699	-1.24933	0.977785	0.301387	0.930979	-0.422271	0.428836	-0.186648	0.903267	0.804875	-1.55869	-1.3799	1.10327	-0.938682
WDR43	0.141037	-0.0385032	-1.11203	-1.21254	1.37924	0.824855	0.497077	0.0179162	0.318071	0.108412	2.33713	0.281366	-1.29089	-1.2414	-0.31758	-0.692161
TOGARAM2	-0.165043	1.3802	-0.025165	-0.48708	-0.48708	-0.367323	-0.340312	-0.316335	-0.48708	-0.321952	-0.436037	-0.357915	-0.163803	-0.28981	3.35182	-0.48708
CLIP4	1.00109	2.11811	-0.785636	-0.873784	-0.729193	-0.343896	0.15532	0.39469	-0.365415	1.61435	-0.515352	-0.802929	-0.873784	-0.873784	1.3719	-0.491687
YPEL5	-0.178754	-0.383868	2.03154	-0.179076	-0.956059	-0.542931	-0.501594	-0.461847	0.0446141	-0.178207	-0.772666	-0.724832	1.62209	2.11099	-0.0695917	-0.859815
LBH	1.18915	1.92908	-0.584896	-0.149558	-0.362971	-0.750861	-0.667809	-0.733071	0.992229	-0.735597	-0.714167	1.5361	-0.746713	-0.767813	1.31256	-0.745663
LCLAT1	1.09336	0.391781	0.696965	-1.4936	1.64376	-0.226953	-0.304636	-1.16036	-0.47047	-0.883071	1.16311	1.12703	0.00707184	-0.750276	0.633651	-1.46735
EHD3	-0.469998	-0.0362477	-1.1993	-0.469049	0.558294	-0.947265	0.0659409	-0.608708	1.7673	0.714741	2.07312	0.780179	-1.0997	-1.27026	0.355091	-0.214143
MEMO1	-0.0814212	0.0441234	2.81592	-1.50833	-0.103734	-0.051475	0.224721	-0.652468	-0.495198	0.032471	-0.00669571	-0.113478	0.852757	0.798376	-0.125292	-1.63028
DPY30	0.551901	0.451428	-0.86566	-2.15187	1.06939	-0.210123	0.353382	1.63675	0.859414	-0.0975999	0.719718	-0.0896672	-0.83576	-0.824392	0.790607	-1.35751
SPAST	-0.640952	-0.487628	2.13618	-0.866825	-0.463693	-0.0120229	-0.436461	-0.605183	-0.721102	0.105312	0.153563	-0.219539	1.06955	2.20524	0.0681995	-1.28464
SLC30A6	0.34767	1.41872	1.48197	-0.931712	0.185757	0.0443478	0.218441	-0.727604	-0.0984621	-0.288755	1.19017	0.564825	-1.29636	-2.15538	0.741698	-0.695334
NLRC4	-0.567974	-0.562794	2.4639	-0.571296	-0.568341	-0.360772	-0.558231	0.0211732	-0.563706	0.0927105	-0.565786	-0.502124	1.89499	1.44975	-0.540381	-0.561123
YIPF4	-0.433055	-0.179985	1.28458	-0.63343	-0.966888	-0.378471	-0.37745	-0.584655	-0.705765	-0.0373838	-0.404657	0.613128	2.02107	1.87423	0.437778	-1.52905
BIRC6	0.367981	1.19167	1.17634	-1.96069	-0.793163	0.151216	-0.572446	-0.872919	0.256625	0.211447	0.425826	0.560464	-0.553953	0.0777472	1.82526	-1.4914
AL133243.3	0.00729877	0.45165	1.35141	-1.73393	-1.04593	0.160934	-0.0260196	-1.09606	0.864044	0.752734	0.811895	-1.09012	-0.42724	1.3351	0.952445	-1.26821
TTC27	0.166946	0.227647	-0.868265	-0.819483	1.12532	-0.12638	0.667962	-0.453586	0.0944934	-0.197788	3.00735	0.105162	-0.93006	-0.960079	-0.264084	-0.775157
LTBP1	-0.441278	-0.455357	-0.283094	0.158846	1.8323	-0.417813	-0.207726	-0.460245	-0.460245	-0.124332	3.08062	-0.460245	-0.444104	-0.460245	-0.431797	-0.42528
RASGRP3	-0.657991	-0.635921	-0.650134	1.8752	-0.476931	-0.494322	-0.405505	-0.592907	1.81645	-0.390858	0.261725	2.05231	-0.675813	-0.71306	-0.650665	0.338421
FAM98A	-0.429279	0.174256	-1.07192	-0.540085	0.844214	0.916377	0.201383	-0.157806	0.532484	-0.143767	2.14921	-0.795922	-1.46951	-1.59722	0.195477	1.19212
CRIM1	0.816463	1.6142	-0.644619	-0.745938	-0.735575	-0.596982	0.339119	-0.745938	0.703101	0.336005	-0.498491	-0.216365	-0.745938	-0.745938	2.581	-0.714101
FEZ2	-0.860345	-0.373119	0.657137	-2.0284	-0.294585	0.129914	0.457439	1.60562	-0.553972	1.07004	0.620066	-0.0346855	0.206617	0.376665	0.956946	-1.93534
STRN	-0.393283	0.155996	2.09522	-1.12706	-0.205311	-0.173308	-0.628551	-0.801316	-0.4379	-0.174329	0.401505	-0.701364	0.758744	2.04181	0.619921	-1.43078
HEATR5B	0.0676134	0.58322	1.42704	-0.0470234	-0.844874	0.0747742	0.170628	-1.14732	0.142326	0.279355	0.818717	1.47153	-1.06071	-1.19697	1.178	-1.91631
GPATCH11	-0.0831515	0.322947	-0.950733	-0.727631	0.874546	0.518146	0.121314	-0.590097	1.13348	-0.121652	1.81019	1.20583	-1.50909	-1.44789	0.588034	-1.14424
EIF2AK2	-0.461023	-0.341697	2.11731	-0.941565	-0.430629	-0.538058	-0.222265	-0.736969	-0.302318	-0.471605	0.128474	-0.399203	1.60971	2.09634	-0.283071	-0.823436
CEBPZOS	-0.163969	-0.0822032	1.44274	-1.60724	-0.497091	-0.0188078	0.143482	-0.946934	0.285368	-0.696196	0.369097	-0.174995	2.00191	1.16692	0.458517	-1.68059
CEBPZ	0.36512	0.461745	-0.559731	-1.46327	1.13083	0.538941	0.105455	-0.611921	0.762795	-0.703345	2.0566	0.71868	-1.19918	-0.971968	0.643755	-1.27451
NDUFAF7	-0.0816044	0.55904	1.65002	-1.97413	-0.287155	-0.437949	0.0505201	-0.470035	-0.0555365	-0.582871	-0.225355	0.565427	0.326049	0.786304	1.83645	-1.65917
PRKD3	-0.289337	-0.0729601	-0.851126	-1.27408	-0.882082	0.72662	0.0677889	-0.483335	1.79229	0.0313862	1.375	1.61926	-1.17189	-0.683455	0.89885	-0.802928
QPCT	-0.494334	-0.496795	1.11641	-0.499858	-0.457192	-0.388778	-0.432924	-0.391725	-0.48899	-0.293246	-0.408395	-0.499858	2.62831	2.05269	-0.499858	-0.445449
AC006369.1	1.22813	2.99845	-0.459852	-0.363301	-0.453739	-0.437578	-0.463447	-0.407541	-0.41559	-0.441932	-0.461269	-0.463447	-0.358019	-0.463447	1.42403	-0.461445
CDC42EP3	-0.252529	0.100339	0.669513	-0.98084	-0.856278	-0.104717	-0.752783	0.199139	-0.370457	0.306911	-0.722143	-0.824022	2.59467	1.78248	0.111538	-0.900812
CYP1B1	-0.427852	-0.429571	-0.383802	-0.429571	-0.429571	-0.395736	-0.429571	1.47862	-0.429571	3.17405	-0.429571	-0.429571	0.712054	-0.292869	-0.429571	-0.427895
ATL2	-0.0584317	-0.282064	-0.137602	3.03044	-0.0194144	0.524799	-0.133194	-1.00494	0.112738	-0.0821936	0.586637	0.18216	-0.953275	-1.37487	0.559234	-0.950029
HNRNPLL	0.834475	0.582236	2.65806	-1.2338	0.537806	0.10125	-0.0888923	-0.871616	-1.12522	-0.383453	0.35374	-0.808421	0.548273	0.540833	-0.529706	-1.11556
GALM	2.01474	1.30161	0.586409	-1.27686	-0.841976	-0.784839	-0.608766	-0.626906	-0.339057	-0.424559	-0.413756	-0.687492	0.887355	1.08949	1.12595	-1.00134
SRSF7	1.40868	2.02211	-0.937526	-1.17658	0.389714	0.171892	0.0868675	-0.633111	0.695042	-0.273208	0.581328	0.466379	-1.32859	-1.25796	0.784022	-0.999057
GEMIN6	0.19266	0.0977698	-1.29029	-1.33418	0.702117	0.181845	0.591786	0.905023	0.234562	0.157244	0.736909	2.10225	-1.35502	-1.42511	0.375755	-0.873324
DHX57	-0.389114	0.439436	-1.09979	-1.06476	0.309387	0.831775	0.354527	0.657644	0.0526849	2.09453	0.758133	0.896411	-1.47166	-1.47166	0.0328605	-0.930406
MORN2	-0.514661	-0.388134	-0.734464	-0.584366	2.12076	0.436843	0.999746	-0.167849	-0.181933	0.134829	2.34262	-0.789041	-0.728887	-0.789041	-0.538602	-0.617828
SOS1	-0.358952	-0.421672	0.751112	-1.2369	-0.392407	-0.279837	-0.31487	-0.522537	-0.520173	0.0689853	2.96578	-0.606905	0.50314	1.19201	0.105968	-0.932742
MAP4K3	0.0876996	0.13423	-1.16736	-1.32448	0.722304	0.0125417	1.13823	-0.407015	-0.615759	0.947666	2.08501	-0.232728	-1.25221	-1.32448	0.878922	0.317415
MAP4K3-DT	-0.222669	-0.285517	-1.16357	-1.23206	0.353032	-0.286556	1.82243	0.552611	-0.0292001	0.234646	0.309119	1.09558	-1.1298	-1.23206	-0.673727	1.88774
THUMPD2	-0.185383	0.200945	-1.13549	-1.30556	1.0655	0.620576	1.31963	-0.278037	1.09867	0.0389868	1.68842	-0.197625	-1.27961	-1.30556	0.566298	-0.91175
SLC8A1	-0.56295	-0.565191	-0.161454	-0.565191	-0.565191	0.347839	-0.547494	0.581711	-0.565191	0.553261	-0.558776	-0.565191	3.11348	1.17117	-0.551356	-0.559468
EML4	1.07769	1.66124	1.74931	-1.25539	-0.918285	-0.73337	-1.03093	-0.488408	0.610707	-0.535677	-0.920048	0.783989	0.169952	0.620384	0.279915	-1.07107
COX7A2L	0.269221	0.536503	2.18875	-2.04294	0.153398	0.311902	0.698308	0.752103	-0.521638	0.308364	-0.235112	-0.0267895	-1.26061	-0.402972	0.65096	-1.37945
AC016735.1	-0.250925	-0.26926	-0.26926	-0.26926	-0.183616	-0.249559	3.74613	-0.26926	-0.26926	-0.100175	-0.26926	-0.26926	-0.26926	-0.26926	-0.26926	-0.26926
ZFP36L2	1.75438	1.54097	-1.00166	-1.25574	0.271517	-0.251179	1.58756	-0.504743	0.0239664	-0.502608	0.377973	-0.125876	-0.920037	-1.02261	0.949699	-0.921616
THADA	0.457219	1.10755	-0.699547	-1.91194	0.381696	-0.0468377	0.383246	-0.450502	0.445773	0.247674	0.647909	2.01079	-1.46681	-0.441282	0.570645	-1.23558
DYNC2LI1	-0.602143	-0.251734	0.695948	0.025467	2.03682	-0.691029	0.801095	-0.369361	0.28804	-0.262854	2.23475	-0.55168	-1.17015	-0.886829	-0.30302	-0.993315
LRPPRC	-0.151959	-0.0182331	-1.02316	-1.02038	1.8747	1.07606	0.442379	-0.387786	0.165452	0.0361805	2.0184	0.313907	-1.13648	-1.2351	-0.0315728	-0.922412
PPM1B	-0.592691	-0.443174	2.47005	-0.490834	-0.895996	0.174249	-0.656943	-0.651879	-0.528551	0.242543	-0.273801	-0.188133	0.816839	2.06253	-0.0193042	-1.0249
PREPL	0.88998	1.34122	0.461105	-1.09591	-0.0504796	0.224181	-0.592653	-0.581113	0.298954	0.0496946	0.137349	0.505137	-1.44062	-1.66135	2.15465	-0.640154
CAMKMT	0.553931	1.78202	-0.513332	0.0928335	0.355541	-0.948843	-0.472396	-0.245208	0.213856	-0.160017	0.487475	0.197908	-1.45323	-1.70044	2.11864	-0.308742
SRBD1	-0.82116	-0.666637	0.648532	-1.94367	0.0754638	0.0990236	-0.180325	-0.703913	-0.961945	0.56889	0.719846	1.26588	1.67852	0.421732	1.07343	-1.27366
PRKCE	-0.391582	0.0244206	-0.435013	-1.10888	-1.15904	1.1329	0.203042	0.675627	1.27065	1.09592	-0.949381	1.97864	-0.498381	-1.09762	0.315924	-1.05724
RHOQ	-0.89642	-0.665248	0.0982092	-1.08726	-1.11545	0.236647	-0.665068	0.65552	0.0722885	1.35592	-0.839463	-0.0927825	1.14693	2.4528	0.0495242	-0.706154
PIGF	0.289864	0.998753	-1.05673	-1.65914	0.403916	0.176642	1.31856	0.123538	-0.0803917	0.0337074	0.828906	0.835441	-1.56993	-1.49593	1.33251	-0.479729
CRIPT	-0.878781	1.5827	0.490644	1.48649	0.331547	-0.688427	0.342428	-0.636846	-0.420027	-0.357304	0.43426	-0.725006	0.0312251	-0.065252	1.36811	-2.29575
SOCS5	-0.242383	-0.616932	1.9894	-0.822669	-0.901763	-0.624995	0.159504	-0.873792	0.386255	-0.361981	-0.00105129	-0.130281	1.27417	2.0871	-0.0338799	-1.28669
MCFD2	0.00482046	-0.31758	-1.04055	-1.81608	1.07949	1.09688	1.18992	0.771519	-0.0503601	0.252439	1.34329	-0.40393	-1.28703	-1.48814	0.253756	0.411567
TTC7A	-0.296267	-0.297019	-0.801831	-0.989268	-0.595835	1.56174	-0.331152	1.81623	0.965957	1.39917	-0.856805	1.13987	-0.78113	-0.989268	-0.32888	-0.615518
CALM2	-0.691676	-0.397854	0.860563	-1.5231	0.349247	0.375328	-0.395816	1.35221	-0.545176	1.26134	0.482009	-0.725729	0.969843	1.06223	-0.38664	-2.04678
BCYRN1	-0.559176	-0.588474	-0.526951	-0.588474	1.33506	0.176442	-0.0514469	-0.498655	-0.478597	1.38349	2.86028	-0.588474	-0.533146	-0.588474	-0.193357	-0.560049
EPCAM	-0.381847	-0.381847	-0.205416	-0.381847	3.6352	-0.358507	-0.296769	-0.341693	-0.381847	-0.365884	0.609867	-0.138471	-0.241056	-0.0826655	-0.32868	-0.358543
MSH2	0.0435311	-0.142928	-0.748475	-0.724215	2.6842	0.338937	0.585852	-0.708469	-0.0867525	-0.442842	1.85916	-0.428603	-0.85032	-0.790161	0.131815	-0.720727
MSH6	-0.310484	-0.479502	-0.80286	-0.973634	1.81645	0.891934	0.443751	-0.699534	0.0556108	-0.410802	2.46924	0.232503	-0.719233	-1.00378	0.146418	-0.656085
FBXO11	-0.687263	-0.542357	1.73554	-0.208842	-0.788874	0.0268637	-0.561347	-0.629178	-0.102257	0.398103	0.190536	-0.842656	2.1924	1.45401	-0.237843	-1.39683
AC092650.1	-0.320408	-0.30728	3.63057	0.252047	-0.432515	-0.165944	-0.506809	-0.437865	-0.204713	0.0127737	-0.445969	-0.154352	0.25376	-0.597872	-0.141074	-0.434345
FOXN2	-0.420433	-0.328656	2.5635	-1.17555	-0.635174	0.501157	-0.682955	-0.00850236	-0.628115	0.528489	-0.386861	-0.504498	1.20197	1.30667	-0.153343	-1.17771
PPP1R21	0.0338367	0.312757	2.06926	-1.52843	-0.884994	-0.203823	-0.396005	0.667913	-0.463849	-0.0550269	-0.909782	-0.0527781	1.36327	1.41583	0.0257136	-1.39391
ASB3	0.729262	0.917306	-0.694448	-0.994779	-0.12744	-0.842701	0.35102	-1.0823	0.381301	-0.692047	0.188421	2.76141	-0.807085	-0.648965	0.836743	-0.2757
CHAC2	-0.447329	-0.372454	-0.653288	3.27026	1.13675	-0.232878	-0.229282	-0.51532	-0.300368	-0.622289	0.370903	-0.129698	-0.592038	-0.706428	-0.431872	0.45533
ERLEC1	-0.059918	0.109195	-0.590893	-0.728906	-0.290994	-0.172695	-0.0237553	-0.0128051	-0.242679	-0.248237	-0.17216	-0.114249	-0.630974	-0.611287	0.181937	3.60842
PSME4	-0.676292	0.718578	-0.313216	2.4535	0.224236	0.0598517	-0.49931	-0.725404	-0.131161	-0.215079	1.29057	-0.25394	-0.685394	-1.25575	1.27698	-1.26818
ACYP2	0.36945	1.4542	-1.2268	-1.33495	-0.396097	-0.0808619	1.1515	0.710992	0.436192	-0.426948	0.223863	-0.672559	-1.1212	-1.17746	1.98417	0.10652
SPTBN1	-0.358898	-0.592091	2.5764	-1.22655	-1.16408	0.227191	0.290624	-0.796067	-0.0322663	-0.327332	-0.765183	0.718034	1.02547	1.21145	-0.0650391	-0.721665
EML6	-0.358939	-0.43591	-0.47192	-0.582237	-0.526713	-0.506206	-0.358629	-0.582237	2.95659	-0.315563	-0.507507	-0.112217	-0.0414367	0.196554	-0.319481	1.96585
RTN4	-0.712907	-0.654605	1.51818	-1.22311	-0.471515	0.0705775	-0.165825	0.282652	-0.669403	0.360925	-0.168444	-0.734683	1.95349	1.91946	-0.188983	-1.11581
RPS27A	1.48043	0.571472	-1.21852	-1.21928	0.54354	-0.161427	1.08958	-0.0232857	1.11065	-0.471129	0.570046	1.3848	-1.30191	-1.28292	-0.0958835	-0.976168
MTIF2	-0.446642	-0.536482	-0.586595	-1.36971	0.939473	0.988046	0.189717	0.0105261	-0.172013	0.365057	2.31096	0.722654	-1.30034	-1.07552	0.853223	-0.892361
CCDC88A	-0.686754	-0.680527	-0.611524	-0.695175	-0.043822	2.18385	0.269237	0.817662	-0.652337	2.21903	0.728878	-0.415969	-0.777319	-0.796359	-0.561121	-0.297747
CFAP36	1.54278	0.598202	-1.0249	-0.999207	0.753886	-0.263993	1.99154	-0.742777	-0.188428	-0.461523	1.44711	0.0914335	-0.985007	-0.97441	0.0968305	-0.881526
PPP4R3B	0.118929	0.611883	0.907081	-1.81327	-0.303025	0.143386	-0.24181	-1.21653	0.185123	-0.164076	0.457014	1.11706	-0.149947	0.338819	1.90135	-1.89199
PNPT1	0.154224	0.240878	-0.983123	-1.17995	1.33309	0.389856	0.181039	-0.746803	0.605966	-0.191556	1.96987	1.36503	-1.12873	-1.43383	0.157241	-0.733203
VRK2	-0.435502	-0.250909	-0.689525	-1.42657	2.5314	0.372088	0.232518	0.138479	0.755577	0.0575368	1.19593	0.537546	-1.02556	-1.13095	0.126358	-0.988416
FANCL	-0.464907	-0.194978	-0.836348	-0.238226	1.60734	0.0530784	1.60763	-0.688813	-0.00764099	-0.292979	2.41925	-0.00881149	-0.91253	-0.95301	-0.355341	-0.733718
LINC01122	-0.356727	-0.367231	-0.367231	0.169	-0.304327	-0.29979	3.65297	-0.367231	-0.367231	0.273294	0.170661	-0.367231	-0.367231	-0.367231	-0.367231	-0.367231
BCL11A	-0.708876	-0.706032	-0.616725	-0.414667	0.256505	-0.137893	1.07522	-0.622815	1.81294	-0.330852	0.719453	2.44556	-0.709231	-0.704261	-0.708783	-0.649553
PAPOLG	0.316341	0.791154	0.359801	-0.346237	-0.721256	-0.932234	-0.67244	-1.25356	-0.238501	-0.0637785	-0.058289	-0.0210168	0.44988	1.83572	2.12398	-1.56955
REL	-0.749849	-0.0889851	0.309305	-1.3725	-0.973161	-0.326026	-0.519107	0.194518	1.58819	0.181133	-0.994772	1.91778	0.71222	1.12788	0.385824	-1.39245
PUS10	-0.71425	-0.382809	1.17919	-1.58279	-0.54243	-0.309414	0.664539	-0.705825	0.0340973	-0.230498	0.603069	-0.553774	1.01492	1.50258	1.60936	-1.58597
PEX13	0.222051	1.28369	0.361017	-1.8331	-0.412607	-0.309755	-0.0635708	-0.902187	0.363277	-0.661908	0.246999	0.640006	-0.298617	1.29369	1.75627	-1.68525
AC016747.1	0.0774663	0.0777434	-0.795092	-0.884959	-0.421692	0.66123	1.68175	-0.713076	1.80959	0.0270246	0.341901	-0.885705	-0.502002	-1.42041	1.64078	-0.694542
C2orf74	0.0913159	0.704378	-0.847205	-0.967287	-0.348524	-0.259725	0.574485	3.07549	0.641547	-0.339871	-0.600289	-0.354588	-0.816768	-0.967287	0.492409	-0.0780845
AHSA2P	0.123394	0.832619	0.264257	-1.73993	-0.860895	-0.595444	0.905971	-0.85578	0.48574	-0.0367271	-0.0879681	1.79254	-0.401105	-0.0407618	1.67258	-1.45849
USP34	0.102866	0.686996	1.23685	-0.498702	-0.847563	-0.546182	-0.563814	-1.2406	0.0481133	-0.247591	0.084487	1.21024	-0.425488	1.05623	1.84713	-1.90298
XPO1	-0.287883	-0.334941	0.231465	-1.35247	1.04419	1.87297	-0.0122166	-0.631943	-0.417217	0.260087	2.14372	-0.297421	-1.0208	-0.267655	0.387288	-1.31717
CCT4	0.216994	0.139242	-0.974567	-1.18651	1.89824	0.428211	1.34326	-0.208281	0.294217	-0.276367	1.70198	-0.144001	-1.26081	-1.28429	0.0955941	-0.782905
COMMD1	-0.185595	0.0930025	-1.31619	-1.63355	1.55168	0.443274	1.04659	0.916699	0.00192942	0.378474	0.844606	0.126003	-1.54068	-1.52281	0.656924	0.139643
B3GNT2	-0.644091	-0.253366	1.32137	-0.87452	0.377703	-0.404821	0.37987	-0.974269	-0.737732	-0.510789	1.32788	-0.742313	1.52698	1.85035	-0.381421	-1.26083
EHBP1	0.268168	0.3603	-1.06082	-0.36635	1.31371	0.779997	1.1233	-1.002	-0.148153	-0.139016	2.07554	0.113069	-1.47818	-1.35161	0.228172	-0.716127
WDPCP	0.0663693	0.808157	-0.410724	-1.27081	-0.220083	0.506462	1.25308	-0.880998	0.733731	0.458507	1.12817	0.689594	-1.26868	-1.68009	1.2632	-1.17588
MDH1	0.140195	0.546024	-1.35778	-1.56964	1.2709	1.06497	0.481647	0.803657	0.384307	0.258177	0.70068	0.271806	-1.74884	-1.62547	0.502658	-0.123279
UGP2	0.26324	-0.141268	3.39504	-1.09312	-0.690856	0.161875	0.165591	-0.451459	-0.542316	0.0472348	-0.220993	-0.334987	0.395183	-0.0875664	0.0462625	-0.911856
VPS54	-0.443126	-0.335316	3.45558	-0.713939	-0.426829	0.0765424	-0.367244	-0.477526	-0.520335	0.0953532	-0.180255	-0.376388	0.25446	0.851726	-0.293262	-0.59944
PELI1	-0.442783	-0.559045	0.613559	-0.68848	-0.66699	-0.559637	-0.603352	0.126982	-0.192762	0.113789	-0.605894	-0.342334	2.80697	1.90263	-0.62718	-0.275473
AC012368.1	-0.912172	-0.973026	1.45755	-0.669986	-0.998432	-1.00322	-1.03658	0.761857	0.0630249	0.47837	-0.943124	1.73229	1.33427	0.861484	-0.483857	0.331553
LGALSL	-0.393467	-0.418955	3.47123	-0.456817	-0.240812	-0.387763	-0.278287	-0.456817	-0.410271	-0.333506	0.539784	-0.456817	0.841981	-0.456817	-0.456817	-0.105847
AFTPH	-0.780482	-0.50557	1.71638	-1.37222	-1.09342	0.45826	-0.266631	0.18734	0.326277	0.476262	-0.243206	0.355387	0.810847	1.97561	-0.46357	-1.58126
SERTAD2	-0.595683	-0.777588	1.65803	2.82703	-0.972664	0.291683	-0.358746	-0.56548	0.412905	-0.182666	-0.615098	0.279374	0.035983	-0.138668	-0.264479	-1.03393
SLC1A4	-0.594812	0.481306	-0.538051	-0.536302	-0.262947	1.92011	0.656892	-0.523505	-0.404776	-0.349778	0.0195052	-0.735429	-0.88293	-0.903079	0.0169317	2.63687
LINC02576	-0.431366	-0.423745	-0.436296	-0.453201	-0.407877	-0.447875	-0.389334	-0.453201	0.845929	-0.420539	-0.433599	1.96019	-0.453201	-0.453201	-0.430383	2.8277
CEP68	1.80009	0.0530198	-1.03123	-0.795482	-0.0893735	-0.245669	2.4726	-1.12189	0.304208	0.119002	0.857826	-0.273168	-0.456234	-0.527239	0.0359337	-1.1024
RAB1A	-0.808967	-0.519746	1.35152	-1.10252	-1.08393	0.392951	-0.496668	0.409019	-1.0346	0.834248	-0.315774	-0.745079	2.20212	1.38001	-0.294649	-0.167927
ACTR2	-0.592663	-0.510437	2.03043	-0.914443	-0.752044	0.501401	-0.664183	-0.28393	-0.511173	0.272535	-0.397231	-0.515905	1.66444	1.91008	-0.346966	-0.889912
SPRED2	-0.654798	-0.0719332	1.46564	-0.849318	0.191083	-0.293245	-0.173863	-0.814172	-0.802057	-0.212853	0.369513	-1.05668	2.01022	1.98972	-0.137941	-0.959321
MEIS1	-0.461487	-0.464276	-0.447227	-0.306279	0.0988292	-0.339074	2.7326	-0.464276	-0.451619	0.0401433	2.29461	-0.464276	-0.442475	-0.464276	-0.399076	-0.461843
ETAA1	0.450938	0.764346	-1.06196	-1.01763	0.46971	0.519078	1.20086	-0.77913	0.28112	-0.0877084	1.781	-0.287633	-1.32641	-1.4461	1.31196	-0.772453
C1D	-0.444788	0.893456	-0.310415	1.49195	1.03099	-0.275182	-0.0407615	-0.690229	-0.0603469	-0.140839	0.0472636	0.301569	-0.2639	-0.985195	1.81543	-2.369
WDR92	-0.329491	-0.183576	0.376663	-0.605508	0.222132	0.52394	0.675724	-0.944258	0.270221	-0.132923	2.76711	0.97081	-1.16522	-1.42138	-0.306608	-0.71763
PNO1	0.350545	-0.12694	-1.2938	0.22827	1.96138	0.849023	-0.219273	0.362085	0.680319	-0.238485	1.66993	-0.946522	-1.43904	-1.37332	0.0118928	-0.47607
PPP3R1	-0.773427	-0.390278	1.29005	0.984921	0.153845	-0.419366	-0.55902	-0.448413	-0.901825	-0.246645	0.194177	-0.295539	1.20462	2.01261	0.274189	-2.0799
CNRIP1	-0.405764	-0.411467	-0.407002	-0.416048	2.48534	-0.397731	0.151719	-0.398347	-0.40016	-0.309968	2.58675	-0.416048	-0.416048	-0.416048	-0.416048	-0.413123
PLEK	-0.994845	-0.356895	0.205217	-1.04557	-0.355089	-0.172285	-0.383794	-0.245236	-0.621294	-0.150398	1.51452	-0.841674	2.2095	1.68316	0.538737	-0.984063
ARHGAP25	-0.0944343	0.818025	0.884631	-1.05568	-1.01673	-0.719812	-0.625296	-0.671121	-0.0430246	-0.398528	-0.906817	-0.113639	1.84751	1.84966	1.16453	-0.919262
GFPT1	0.980372	1.52354	-0.45974	-1.74561	-0.503265	1.1916	-0.607533	-1.09842	0.277783	0.0174859	0.44142	-0.0701638	-1.33362	-0.789491	0.80097	1.37467
NFU1	0.0542425	0.759124	0.145601	-1.78462	0.416239	-0.167677	1.06057	0.459474	0.328481	-0.492604	0.667543	1.15838	-1.36946	-1.60463	1.41368	-1.04435
AAK1	1.82819	1.43995	0.395466	-0.933351	-0.862229	0.0629486	-0.618142	-0.00648486	-0.951901	0.0643213	-0.601062	-0.978284	-0.147063	0.0475893	2.11003	-0.849986
ANXA4	-0.762662	-0.404211	2.96235	-0.968021	-0.531297	0.364686	0.238337	1.04755	-0.222585	0.811668	-0.253367	-0.570041	-0.456752	-0.654512	0.426671	-1.02781
GMCL1	0.152391	0.661737	1.73776	-1.69459	0.0189785	0.511293	-0.442504	-0.838336	-0.859031	-0.439854	0.823328	-0.956388	0.411	0.806023	1.49261	-1.38441
SNRNP27	-0.156554	0.00459291	1.36229	-1.81625	-0.00328649	0.691978	-1.08413	-0.0878181	-0.146657	0.481012	0.847112	1.4422	-0.440288	-0.264119	1.08503	-1.91512
MXD1	-0.480217	-0.459822	0.940992	-0.489773	-0.460139	-0.390969	-0.470704	-0.365095	-0.502374	-0.310517	-0.43856	-0.457356	2.41276	2.39067	-0.415037	-0.503863
PCBP1-AS1	-0.0383442	0.490681	0.569129	-1.66209	-0.717384	-0.63845	0.118564	-0.519972	0.0765919	-0.167323	-0.555894	-0.720796	2.03562	1.84191	0.958648	-1.07089
PCBP1	0.100578	-0.0415254	-0.312284	-1.78406	1.26544	0.260261	-0.533818	1.7204	-0.490115	0.274963	-0.568468	-0.887275	1.23396	0.40957	0.992924	-1.64055
TIA1	0.419215	0.557563	0.679441	-1.23952	-0.490522	-0.155961	0.824883	-1.16049	0.559996	0.239251	1.25175	0.437926	-1.23032	-0.632094	1.72709	-1.78821
PCYOX1	1.38746	1.02019	-0.20552	-1.62062	-0.731502	-0.0677677	1.03752	-0.347023	0.0593906	1.08823	-0.14555	-0.404412	-1.2321	-1.67367	1.27328	0.56207
SNRPG	0.0409896	0.269891	-0.929341	-1.25852	1.95493	1.86005	0.138931	0.551641	-0.235987	-0.132226	1.12631	-0.365187	-1.26266	-1.20073	0.0417981	-0.599886
FAM136A	0.00714409	0.212538	-1.20748	-1.41805	1.25184	0.303718	0.652092	-0.378449	0.565918	-0.599428	1.59672	1.28373	-1.42018	-1.46447	0.431166	0.183177
TGFA	-0.389773	-0.388972	0.890687	-0.493382	-0.492532	-0.462367	-0.490443	-0.493382	-0.493382	-0.451791	-0.474291	-0.493382	2.82402	1.90472	-0.0505798	-0.445151
ADD2	-0.378267	-0.454113	-0.433822	1.28311	3.30405	-0.452115	-0.401487	-0.462199	-0.13159	-0.433138	0.513149	-0.124785	-0.445702	-0.462199	-0.462199	-0.458699
TEX261	-0.236324	-0.077302	0.406531	-1.69167	0.485416	1.58927	0.0631162	0.52006	-0.498175	0.794686	1.58921	-0.550833	-1.56871	-0.86518	1.00899	-0.969088
NAGK	-0.744384	-0.723762	0.568671	-1.29631	-0.984822	0.230854	-0.532647	1.93254	0.0821045	1.27806	-0.944617	-0.160934	1.33679	1.2803	-0.564873	-0.756972
MCEE	-0.0329775	0.397506	-1.2221	-0.832065	0.454159	0.0250774	0.140707	0.234189	-0.21885	0.136995	0.2837	0.964021	-1.2377	-1.52543	-0.280105	2.71288
MPHOSPH10	0.484655	0.579657	-1.26655	-1.15209	1.19552	0.420127	0.581446	-0.739746	0.608548	-0.0720657	1.8619	0.483987	-1.35867	-1.42844	0.616418	-0.814694
PAIP2B	0.264487	0.182339	-0.841257	-0.276035	0.325012	-0.740825	-0.357656	-0.729953	0.202707	-0.67688	0.016745	1.49012	-0.891853	-0.891853	0.0116985	2.9132
ZNF638	-0.333167	0.243185	2.08794	-0.397986	-0.54704	-0.169389	-0.190593	-1.06675	-0.241115	-0.143778	0.340894	-0.0427297	0.00790408	1.82741	0.783741	-2.15852
DYSF	-0.490966	-0.489767	1.0512	-0.424813	-0.495548	-0.383568	-0.497268	-0.292941	-0.492924	-0.283125	-0.493638	-0.499039	2.30985	2.43034	-0.453277	-0.494517
SFXN5	-0.607979	-0.624025	1.97283	-0.61623	-0.290592	-0.0981502	-0.41574	-0.432733	-0.587292	0.0196767	-0.29374	-0.652293	1.08369	2.6199	-0.398482	-0.678849
PRADC1	-0.0423974	0.0381876	-1.11138	-1.27333	0.868346	0.828007	0.597921	0.450553	-0.740745	-0.0489425	1.11131	-1.11673	-1.02642	-1.27333	0.785918	1.95303
CCT7	0.249715	0.321093	-1.28778	-1.09479	1.87373	0.339576	1.00126	-0.127857	0.237692	-0.430278	1.65072	0.426528	-1.38046	-1.34743	0.214074	-0.645798
ALMS1	0.65029	0.94939	-0.250542	-1.31559	1.02898	0.679865	-0.188128	-0.791623	0.985377	0.574329	0.920248	0.601431	-1.51719	-1.82528	0.594939	-1.09649
TPRKB	-0.0122771	0.141675	-0.956401	-1.02042	1.53573	0.276479	1.76862	-0.416283	-0.140545	-0.292395	2.02057	-0.000540774	-1.09511	-1.18685	0.074969	-0.697232
DUSP11	0.758815	1.60776	-0.98895	-1.19083	0.156535	-0.755825	0.882533	-0.636068	0.334576	-0.595985	0.419703	1.20838	-0.711201	-1.1213	1.65715	-1.0253
STAMBP	-0.137079	0.860691	-0.649776	-1.72948	0.477351	0.0541652	0.981083	-0.16161	0.261244	0.319728	1.20911	1.35793	-1.30345	-1.35318	1.04324	-1.22996
DGUOK	0.159206	1.03784	-0.699946	-1.75553	0.0899721	0.312118	0.144174	1.4064	-0.0305781	0.335748	0.443463	0.765313	-1.41113	-1.03836	1.57442	-1.33311
TET3	-0.795788	-0.809147	2.12315	0.616112	-0.268993	0.241666	-0.739653	-0.0297356	-0.639381	0.89796	-0.369549	-0.997961	0.529635	1.99125	-0.769465	-0.980104
BOLA3	0.219847	-0.0309271	-0.943234	-0.0816103	3.06818	0.313848	0.105584	-0.456829	0.015047	-0.616214	1.2793	-0.659055	-0.971233	-0.873368	-0.404993	0.0356515
BOLA3-AS1	-0.211226	0.00809081	-0.556049	-0.580925	2.71527	-0.545361	0.722699	-0.580925	-0.234445	-0.478645	2.07443	-0.580925	-0.580925	-0.580925	-0.245343	-0.344789
MOB1A	-0.654825	-0.307298	1.4981	-1.494	-0.889522	0.173739	-0.818121	0.240106	0.311944	0.649718	-0.333154	-0.224472	1.77949	1.63013	-0.177767	-1.38408
MTHFD2	-0.3953	-0.83348	-0.625333	-0.846225	1.77576	1.10777	0.215756	0.808548	-0.77199	0.470964	2.03213	-0.941456	-0.990874	-1.02402	-0.211208	0.228956
DCTN1	-0.366656	0.349461	0.650855	-1.88468	0.0805429	0.237638	0.0854661	0.509176	-0.640355	-0.0152303	0.79062	-0.887884	-0.0324403	2.42217	0.32619	-1.62488
WDR54	1.06681	2.07422	-0.999542	-1.06431	-0.258831	-0.244836	0.896186	-0.393049	0.362016	-0.679576	0.411559	-0.27628	-0.987571	-1.06431	1.74636	-0.588846
INO80B	0.614829	0.356946	-0.150992	3.08798	-0.503545	-0.784724	-0.518382	-0.416223	-0.216271	0.197841	-0.388353	0.0452427	-1.3755	-0.0737993	0.922953	-0.797995
WBP1	0.561281	1.36499	-1.13428	-0.328875	-0.0411005	-0.552855	1.97296	0.777625	0.822984	-0.688953	-1.17182	-0.193242	-1.24843	-1.33632	0.584431	0.611605
MOGS	0.70019	1.7076	-0.872973	-1.29707	0.440255	0.375924	0.0341831	-0.183395	0.188041	-0.200899	-0.166203	0.522481	-1.87854	-1.56427	1.00013	1.19456
MRPL53	0.43496	0.00841451	-0.801493	-0.616909	-0.280357	0.32141	-0.0261383	3.30262	-0.215443	-0.0960915	-0.760562	-0.20091	-0.810344	-1.02528	0.277916	0.488206
TTC31	-0.0462292	1.10646	0.567872	-0.561917	-0.255033	0.136	-0.147441	-0.155791	0.00862135	0.0111346	0.305218	1.70344	-1.42383	-1.77771	1.79483	-1.26563
PCGF1	0.402765	0.860754	-0.822445	-1.43057	0.508	0.48009	0.0795046	1.14033	0.34073	1.00956	-0.505622	-0.394682	-1.21779	-1.43057	1.90812	-0.928185
AUP1	0.387372	0.822035	-1.24986	-1.46002	0.89865	-0.0688926	0.470353	1.14448	0.548205	-0.489054	0.14397	0.290186	-1.53596	-1.63091	1.56395	0.165493
HTRA2	-0.0192559	-0.0384671	-0.59684	-0.437645	2.56968	-0.586317	0.499605	-0.82307	0.599771	-0.83344	1.4245	0.648769	-0.989586	-0.959305	0.501309	-0.959704
DOK1	-0.798803	0.195549	0.892266	-1.9792	-0.117365	0.943673	1.57362	0.850808	-0.565816	0.53651	0.491579	0.737247	-0.778696	-0.653858	0.384482	-1.712
HK2	-0.528132	-0.602275	1.87434	-0.616203	-0.521677	-0.218689	-0.41774	-0.34708	-0.477126	-0.0911651	-0.331181	-0.593127	1.61657	2.42044	-0.597026	-0.56993
POLE4	0.373663	0.0864919	-0.350528	-1.42799	0.0119718	1.58351	-0.592387	1.85215	0.471219	1.4505	0.0297369	0.200122	-1.29262	-1.00481	-0.255688	-1.13534
MRPL19	0.0940449	0.145121	-0.958358	-1.30308	1.85232	0.565049	0.727838	0.338509	-0.0862089	-0.0288408	1.78953	-0.193234	-1.44373	-1.41392	0.515945	-0.600991
GCFC2	0.726693	1.26476	-1.35317	-1.21095	0.894044	0.464112	1.03027	-0.64359	0.756047	-0.213973	1.2333	0.00657839	-1.37169	-1.5233	0.579645	-0.638779
SUCLG1	-0.0795289	0.0181548	1.52012	-2.10575	0.78626	0.706983	0.351719	0.747559	-0.837438	0.17498	0.676297	-1.4918	-0.135503	0.862665	0.284917	-1.47963
TRABD2A	3.56365	0.659078	-0.418088	-0.444354	-0.441153	-0.353071	-0.328915	-0.338278	0.0576286	-0.355467	-0.414321	0.267204	-0.444354	-0.444354	-0.171886	-0.393317
TMSB10	0.308222	0.112761	-0.880599	-0.999969	-0.662807	1.12249	-0.372976	2.60512	-0.0397366	1.3355	-0.452604	0.364076	-0.905778	-0.892185	0.202269	-0.843781
KCMF1	-0.221202	0.17074	0.374831	-1.66872	-0.330809	0.0594092	-0.846796	-0.522235	0.0568003	0.0491714	0.118672	0.979388	1.66086	1.43727	0.794433	-2.11182
TGOLN2	-0.272324	-0.0873264	2.27947	-1.31797	-0.971735	-0.0128746	-0.700629	-0.128671	-0.328381	0.263312	-0.50252	-0.115327	0.985629	1.93189	0.145941	-1.16848
ELMOD3	0.395452	0.943758	0.440674	-1.81897	-0.517212	-0.706853	-0.263422	0.544256	0.716346	-0.383743	-0.979938	1.83821	-0.487245	-0.355166	1.68681	-1.05296
CAPG	-0.794265	-0.8756	1.21596	-0.833361	-0.882426	1.36646	-0.218868	1.72122	-0.370612	1.43704	-0.830701	-0.542337	0.318307	1.00572	-0.870931	-0.845615
MAT2A	-0.281868	-0.283603	0.208085	-1.46936	1.07645	0.936711	1.59948	-0.0699752	-0.406297	0.276045	2.02489	-0.121305	-1.15942	-0.906391	-0.210059	-1.21338
GGCX	-0.184449	-0.0984368	-0.28063	-2.00869	0.015677	1.03391	1.02159	0.0104525	-0.13196	1.1462	1.97281	-1.37056	-1.01614	-0.628585	0.0779021	0.440908
VAMP8	-0.322718	-0.226861	-0.747937	-0.888025	-0.411812	1.87767	0.751613	2.28622	-0.362561	1.15136	-0.0143129	-0.504871	-0.916086	-0.945024	0.0245802	-0.751237
VAMP5	0.0365635	0.339193	-0.638902	-0.867471	-0.756999	0.119649	0.83303	2.94735	-0.556838	1.14627	-0.583321	-0.533049	-0.669341	-0.599372	0.472817	-0.689577
RNF181	-0.431492	-0.0443604	-0.839086	-1.14342	0.017335	1.40596	0.127189	2.77726	-0.345047	1.05847	-0.445425	-0.543002	-0.907529	-0.5716	0.262025	-0.377271
TMEM150A	0.605176	0.653843	-1.02164	-1.16409	-0.43028	-0.464814	2.10775	1.44542	0.413565	0.427686	0.0979289	-1.16409	-0.751093	-1.16409	0.963621	-0.554906
USP39	0.161679	0.688317	-0.790716	-1.50975	1.79232	1.20226	0.111964	0.0209476	0.0184012	-0.132741	0.707223	-0.738977	-1.1957	-0.693959	1.57308	-1.21435
C2orf68	-0.509527	-0.111625	1.22514	-1.94571	-0.774565	0.133521	0.44868	0.196278	-0.767462	0.139737	0.0160116	0.140293	0.25209	1.79802	1.40101	-1.6419
GNLY	-0.285084	0.920346	-0.32529	-0.320499	-0.325266	-0.32338	-0.321939	-0.324894	-0.322571	-0.321464	-0.323227	-0.321283	-0.325437	-0.322746	3.56569	-0.322952
ST3GAL5	0.737346	1.68111	-0.800125	-0.745616	-0.840759	-0.53749	-0.549164	-0.083208	0.878814	0.503439	-0.756606	0.413653	-0.854004	-0.854004	2.36445	-0.557833
POLR1A	0.0698623	0.268855	-1.14714	-1.19877	2.36549	0.325995	0.33497	-0.0825599	0.0378309	-0.162635	1.41532	0.0481394	-1.25206	-1.08095	0.91707	-0.859416
PTCD3	0.24849	0.3594	-0.977493	-0.712136	1.51913	0.17365	0.204831	-0.574092	0.368835	0.0395468	1.95521	0.88607	-1.47771	-1.4697	0.564593	-1.10862
IMMT	-0.118644	-0.0182955	-1.00427	-1.19959	1.77666	1.41156	0.363864	0.265135	-0.491513	0.479513	1.61171	-0.629622	-1.39509	-0.945462	0.608436	-0.714392
MRPL35	0.0874062	0.00677594	-1.03467	-0.43719	2.15657	1.2079	0.13449	0.225155	-0.237329	0.603292	1.51218	-0.69587	-1.41019	-1.46239	-0.232273	-0.423867
KDM3A	0.137672	0.242956	1.31137	-0.0831702	-0.4288	-0.587797	-0.26061	-1.24251	-0.570348	-0.606743	0.0346382	-1.0669	1.482	2.217	0.696133	-1.27489
CHMP3	-0.20599	-0.30965	1.92777	-1.1797	-0.661952	-0.279532	-0.236807	0.14917	-0.648112	0.397434	-0.234563	-0.241859	1.4961	1.97096	-0.493918	-1.44935
RNF103	-0.461328	-0.390232	2.38488	2.24148	-0.492143	-0.792599	-0.325975	-0.720943	-0.378488	0.0519285	-0.227119	-0.78595	0.313011	0.844677	-0.582797	-0.678403
RMND5A	-0.56175	-0.283435	-0.0695612	3.31601	0.331263	-0.319261	-0.41215	-0.597148	-0.922804	-0.235971	0.339301	-0.408385	0.282434	0.617835	0.0253926	-1.10178
CD8A	0.615038	3.59014	-0.349817	-0.358956	-0.358736	-0.357767	-0.358956	-0.325886	-0.355724	-0.34501	-0.358956	-0.358956	-0.335155	-0.347009	0.358985	-0.353235
CD8B	0.683174	3.62433	-0.326877	-0.335787	-0.335616	-0.32953	-0.335335	-0.304576	-0.306913	-0.323922	-0.335787	-0.32226	-0.331294	-0.335787	-0.0512924	-0.332531
LINC01943	0.852054	3.38914	-0.478016	-0.034897	-0.217107	-0.204008	-0.345877	-0.564257	-0.794025	-0.274202	0.177733	-0.794025	-0.336681	-0.441101	0.45301	-0.387745
CYTOR	-0.548003	1.04473	-0.71238	0.000342624	1.75365	-0.517693	-0.0679219	-0.549195	-0.987682	-0.339521	2.36288	-1.07969	-0.810811	-0.436845	0.0146174	0.873529
RNU2-63P	-0.33534	-0.393017	0.056202	-0.90051	-0.570898	0.23165	0.361747	-0.994826	3.01499	-0.0622001	1.275	0.142518	-0.945051	-0.875169	-0.102189	0.0970911
KRCC1	-0.021964	0.390842	0.400353	-2.3703	-0.297338	-0.896546	0.801982	-0.447715	1.33414	-0.126892	0.681264	0.0989288	0.0183806	0.807218	1.28711	-1.65947
EIF2AK3	-0.0907748	0.229004	-0.759771	-0.92146	-0.593469	-0.116228	-0.372061	-0.441305	0.634271	-0.155063	-0.311597	2.73734	-0.824361	-1.05737	0.345617	1.69722
RPIA	-0.226496	-0.470375	0.136179	2.61386	1.68051	-0.0830348	0.206849	-0.483215	-0.323563	-0.526882	0.915274	-0.00466559	-1.1451	-1.06905	-0.191431	-1.02886
ANKRD36BP2	-0.282775	-0.422573	-0.43654	1.04143	0.157067	-0.40554	-0.257005	-0.454766	-0.277853	-0.326228	0.0122295	-0.454766	-0.454766	-0.454766	-0.447258	3.46411
IGKC	-0.264797	-0.260713	-0.260183	-0.265699	-0.264196	-0.263748	-0.255834	-0.270157	-0.187548	-0.262717	-0.265256	-0.150294	-0.262201	-0.259986	-0.254668	3.748
IGKV4-1	-0.25698	-0.256359	-0.257746	-0.257689	-0.256399	-0.256861	-0.25712	-0.258202	-0.18217	-0.256487	-0.258062	-0.225473	-0.257157	-0.257697	-0.254867	3.74927
IGKV1-5	-0.252235	-0.250974	-0.253606	-0.253632	-0.250379	-0.251242	-0.251615	-0.252109	-0.235002	-0.250876	-0.253473	-0.239234	-0.253632	-0.253632	-0.248306	3.74995
IGKV1-6	-0.256136	-0.256136	-0.256013	-0.256136	-0.195613	-0.255473	-0.25542	-0.256136	-0.228646	-0.256136	-0.256136	-0.256136	-0.256136	-0.256136	-0.25313	3.74952
IGKV1-8	-0.347055	-0.34088	-0.349927	-0.349927	-0.345856	-0.348654	-0.349927	-0.349927	0.205104	-0.347829	-0.349927	0.743055	-0.349927	-0.349927	-0.349927	3.58154
IGKV1-9	-0.251483	-0.251317	-0.252666	-0.254068	-0.253721	-0.25402	-0.254068	-0.254068	-0.209689	-0.252429	-0.25366	-0.250734	-0.251159	-0.254068	-0.252632	3.74978
IGKV3-11	-0.265284	-0.264503	-0.264514	-0.265335	-0.260926	-0.261372	-0.254146	-0.263898	-0.128826	-0.260283	-0.264539	-0.208659	-0.264817	-0.265335	-0.255245	3.74768
IGKV1-13	-0.248336	-0.251003	-0.251003	-0.251003	-0.250637	-0.251003	-0.249573	-0.251003	-0.24316	-0.251003	-0.248255	-0.251003	-0.251003	-0.251003	-0.251003	3.74999
IGKV3-15	-0.253466	-0.251714	-0.256562	-0.256793	-0.25434	-0.255832	-0.254345	-0.256793	-0.230142	-0.25497	-0.256658	-0.203034	-0.25625	-0.256793	-0.251935	3.74963
IGKV1-16	-0.257152	-0.253984	-0.259291	-0.260344	-0.25862	-0.257754	-0.256609	-0.259867	-0.148555	-0.252725	-0.260344	-0.255414	-0.258104	-0.260344	-0.249502	3.74861
IGKV1-17	-0.25502	-0.255064	-0.255064	-0.255064	-0.253815	-0.252949	-0.253831	-0.255064	-0.241829	-0.251304	-0.255036	-0.201674	-0.255064	-0.255064	-0.253825	3.74967
IGKV3-20	-0.257707	-0.256387	-0.258756	-0.258671	-0.256396	-0.256427	-0.255204	-0.25769	-0.188929	-0.254637	-0.258537	-0.219979	-0.258496	-0.258867	-0.252652	3.74934
IGKV1-27	-0.259886	-0.259722	-0.261874	-0.2625	-0.260854	-0.261842	-0.261672	-0.260134	-0.241258	-0.261974	-0.26204	-0.116173	-0.259732	-0.259321	-0.258578	3.74756
IGKV1-39	-0.264878	-0.265732	-0.268727	-0.269529	-0.0475712	-0.268973	-0.268698	-0.267007	-0.258738	-0.268849	-0.268715	-0.22562	-0.266475	-0.269529	-0.265277	3.74432
AC006453.2	-0.564986	-0.36312	-0.861603	-0.861603	1.59573	-0.368126	2.69401	0.00636868	-0.329791	0.164865	0.482827	-0.861603	-0.861603	-0.861603	0.356978	0.633254
IGKV1D-39	-0.24481	-0.249712	-0.255985	-0.255985	-0.203311	-0.255085	-0.253898	-0.255985	-0.254581	-0.255252	-0.255985	-0.245054	-0.255365	-0.255985	-0.252687	3.74968
IGKV2D-29	-0.261693	-0.258824	-0.261962	-0.261962	-0.258646	-0.255862	-0.256061	-0.261115	-0.260528	-0.25255	-0.261962	-0.115098	-0.261962	-0.261962	-0.257367	3.74755
IGKV3D-20	-0.283878	-0.279226	-0.272001	-0.287138	-0.27859	-0.276788	-0.282387	-0.287138	0.200396	-0.280067	-0.286709	-0.287138	-0.262811	-0.287138	-0.272252	3.72286
IGKV1D-13	-0.250057	-0.250471	-0.250471	-0.250471	-0.249999	-0.2486	-0.248053	-0.250471	-0.250471	-0.249368	-0.249684	-0.250471	-0.250471	-0.250471	-0.250471	3.75
IGKV3D-11	-0.272663	-0.272595	-0.27327	-0.27327	-0.272967	-0.27327	-0.27327	-0.27327	0.0800257	-0.27327	-0.27327	-0.264561	-0.27327	-0.27327	-0.27327	3.73546
IGKV1D-8	-0.266296	-0.266553	-0.266553	-0.266553	-0.155355	-0.26608	-0.266553	-0.266553	-0.133832	-0.266553	-0.265132	-0.261098	-0.266553	-0.266553	-0.266553	3.74677
MAL	2.56437	-0.387889	-0.490537	2.17004	1.02539	-0.483459	-0.325335	-0.498943	-0.498943	-0.481962	-0.176758	-0.498943	-0.493285	-0.498943	-0.426612	-0.498196
MRPS5	0.249374	0.326385	-0.949646	-1.18421	0.596743	1.57259	0.201802	1.21739	0.0667453	0.803924	0.141318	0.236792	-1.56162	-1.72917	1.01069	-0.999112
ZNF514	0.416257	0.994277	-0.906483	-1.189	0.123463	0.279187	1.63916	-0.589039	0.981833	0.401793	1.23178	-0.0588297	-1.84711	-0.790418	0.538907	-1.22578
FAHD2A	0.267909	0.625397	-1.12269	-1.29646	1.67363	0.227794	1.79132	0.795569	-0.509956	-0.499787	0.630407	-0.0570182	-1.29646	-1.29646	0.593242	-0.526436
LINC00342	0.208228	0.607428	-0.631127	-0.999426	0.627715	0.0384646	1.83599	-0.419627	-0.488056	0.0732247	1.8701	-0.531323	-1.22192	-1.22192	1.17658	-0.924322
ANKRD36C	0.573924	1.10375	-0.329138	-1.19288	0.0205928	0.931858	1.20254	-1.30165	-0.0811648	0.328261	1.22664	-0.0787389	-1.41475	-1.45125	1.24893	-0.786936
DUSP2	0.768538	2.85437	-0.487882	-0.481863	-0.461491	-0.456512	-0.400658	-0.373797	-0.204623	-0.464274	-0.469583	-0.433994	-0.459507	-0.479539	1.95019	-0.399366
STARD7	-0.432648	0.0797284	-1.04753	-1.41945	1.23384	1.39792	0.0827564	0.554851	0.0467035	0.491125	1.65912	0.20236	-1.65454	-1.44593	0.181413	0.0702707
TMEM127	-0.489622	-0.358381	1.59292	-1.02741	-0.888344	-0.144908	-0.688745	0.643743	-0.317697	0.665501	-0.767324	-0.585095	2.08818	1.54957	-0.252863	-1.01952
CIAO1	0.428133	1.45997	-0.82437	-1.66312	0.531939	0.231989	0.305694	0.21314	0.14476	-0.263603	0.291108	0.126487	-1.04034	-1.32424	2.23739	-0.854942
SNRNP200	0.720627	1.40096	-0.284823	-1.78651	1.11439	0.330645	0.10889	-0.750359	0.00502545	-0.276011	0.856827	0.835404	-1.10787	-1.05219	1.25965	-1.37467
NCAPH	-0.493689	-0.194871	-0.38051	-0.676823	2.12836	2.31832	-0.304055	-0.652785	-0.535035	-0.494984	1.15776	-0.676823	-0.676823	-0.676823	0.545098	-0.386318
ARID5A	0.530001	1.68677	-0.0254084	-1.05483	-0.900226	-0.718774	0.101971	-0.368512	-0.2723	-0.595452	-0.7464	-0.644033	0.728966	0.869387	2.3788	-0.969958
KANSL3	0.272795	1.53635	-0.579153	-0.447828	0.0556692	0.168866	0.252904	-0.508661	-0.185453	0.441844	0.35814	-0.656219	-1.1718	-1.11389	2.66305	-1.08661
CNNM3	0.524026	1.71926	-0.926619	-0.0602874	-0.0986197	-0.71977	-0.119479	-0.600444	0.309282	-0.674326	1.05855	0.0630922	-0.768639	-1.10969	2.36353	-0.95986
ANKRD39	0.81573	2.25705	-1.17397	-1.33528	0.393829	0.0518952	0.354134	-0.656237	0.288948	-0.0811766	0.498552	-0.252431	-1.13993	-1.33528	1.37017	-0.0560015
SEMA4C	0.435856	1.24159	-0.640271	-0.671472	0.376989	-0.542366	0.129514	-0.223436	-0.671472	-0.333629	0.213359	-0.671472	-0.523381	-0.671472	3.12864	-0.576977
FAM178B	-0.297992	-0.298149	-0.296639	-0.311812	3.67361	-0.292768	-0.250383	-0.311812	-0.297763	-0.295326	0.504428	-0.311812	-0.311812	-0.311812	-0.289913	-0.30004
FAHD2B	0.540711	0.911029	-0.995002	-1.02019	1.93566	-0.168065	1.24106	-0.883357	0.0450103	-0.879924	1.5664	-1.02019	-1.02019	-0.58504	0.311596	0.0205109
ANKRD36	1.13808	1.91823	-0.622079	-1.04519	0.116538	-0.147353	0.898703	-1.09213	0.000633567	-0.255095	0.428697	0.953959	-1.31558	-1.43387	1.0827	-0.626238
AC092683.1	1.4525	1.34195	-0.888685	-0.633835	-0.476948	-0.878746	1.17825	-1.12674	0.450769	-0.193949	1.6904	0.126155	-1.15622	-1.06869	0.653328	-0.469536
ANKRD36B	1.74749	2.17695	-0.353134	-1.11053	-0.14697	-0.526821	0.238778	-0.92527	0.107523	-0.432481	-0.23738	0.135742	-1.19117	-0.847646	1.48702	-0.122094
COX5B	-0.315252	-0.041198	-0.679746	-1.38424	0.694555	1.70366	0.0086629	2.1242	-0.378682	1.2447	0.307373	-0.312327	-0.903747	-1.05012	-0.120731	-0.897109
ACTR1B	1.28143	2.12329	-0.648378	-1.30527	0.0926099	-0.059484	1.06576	-0.424406	0.211365	-0.313891	0.0533834	0.0697861	-1.2811	-1.30527	1.16999	-0.729808
ZAP70	1.11272	1.81826	-0.415011	-0.456293	-0.453991	-0.447594	-0.422365	-0.420545	-0.432315	-0.448036	-0.440954	-0.456293	-0.453596	-0.456293	2.81334	-0.441038
TMEM131	-0.659803	-0.547455	1.75757	-1.3742	-0.711263	-0.200203	-0.716208	-0.25408	0.519556	0.15975	-0.482891	1.21341	0.364062	2.23501	-0.346714	-0.956544
INPP4A	0.709981	1.24759	0.325555	-0.939421	-0.733096	-0.40284	-0.647347	-0.209486	-0.702641	0.0486532	-0.665515	-1.07377	0.046306	0.671777	2.82673	-0.502481
COA5	-0.118149	-0.220974	-0.928003	-1.39038	0.00391961	0.99757	1.41683	1.53842	0.466718	0.456381	0.617864	0.492413	-1.26338	-1.49512	0.642173	-1.21628
UNC50	-0.00122092	1.26095	-0.87948	-1.78376	-0.417638	-0.436563	0.524194	0.32542	0.354584	-0.0577716	-0.501845	1.42642	-1.45895	-0.603535	1.92186	0.327338
MGAT4A	1.62223	1.63031	1.12766	-0.843448	-0.770058	-0.317873	-0.536926	-0.492272	-0.617003	-0.254875	-0.677501	-0.60983	-0.269817	-0.347803	2.11239	-0.755176
TSGA10	1.49834	0.762386	-0.114708	0.534685	0.654439	-0.590173	1.40564	-1.43758	0.567202	-0.925609	0.574267	-1.19368	-1.31029	-0.818729	1.10735	-0.713538
LIPT1	1.06977	1.38925	-0.637364	-0.618718	-0.320541	-0.197447	1.03249	-0.52063	0.174525	-0.297797	0.213741	1.69294	-1.33254	-1.50732	1.06325	-1.20361
MITD1	0.267789	0.62281	-0.518921	-1.74576	-0.322011	-0.312176	0.0998289	-0.617906	1.00483	-0.318237	0.327852	2.16889	-0.844945	0.0583325	1.47589	-1.34626
MRPL30	0.128105	0.0375505	-0.848137	-1.20222	0.620015	0.701922	0.206569	0.557356	0.346913	0.842166	2.25984	-0.555255	-1.62183	-0.954447	0.65357	-1.17211
TXNDC9	0.541161	1.33545	-0.620706	-1.11915	1.52599	0.00227431	0.163861	-0.226945	-0.227037	-0.0965196	0.550511	-0.945732	-1.00019	-1.006	2.13911	-1.01608
EIF5B	0.0592731	0.227533	-1.14062	-0.561754	1.7017	1.00195	0.0845764	-0.15781	0.123826	-0.11114	2.12731	-0.207722	-1.51432	-1.55958	0.15305	-0.226271
REV1	0.957739	0.17184	-0.413611	-1.72525	0.863103	0.417849	-0.270613	-1.59949	0.379801	0.0669593	1.10176	0.590344	-0.587121	1.02336	0.885433	-1.8621
AFF3	-0.378727	-0.410767	-0.424224	-0.331719	-0.362399	-0.158292	-0.0048418	-0.414157	1.33474	-0.302294	-0.240302	3.38043	-0.421969	-0.425661	-0.416471	-0.423346
PDCL3	0.702477	0.810973	-1.23064	-1.43117	0.625001	0.453729	0.0664494	0.442798	0.0519431	0.368866	1.28208	-0.244121	-1.38477	-1.43117	1.73555	-0.817993
RPL31	1.02243	-0.0988026	-1.0808	-1.20594	0.871181	0.499768	1.40667	-0.0757343	0.657779	-0.11824	1.87433	0.146197	-1.27633	-1.20108	-0.345817	-1.07561
TBC1D8	-0.63704	-0.688107	2.59297	-0.608968	-0.686098	0.0536492	-0.42256	1.66062	-0.589245	0.625482	-0.679228	-0.553862	1.06282	0.230884	-0.695985	-0.665337
CNOT11	1.05755	1.47126	-0.260407	-2.07596	-0.0742856	0.683055	0.00696947	-0.404161	0.621476	-0.42043	0.396656	0.161873	-1.25481	-0.300962	1.6479	-1.25573
RNF149	-0.332638	-0.171328	0.930614	-0.658548	-0.597627	-0.543167	-0.532567	-0.0674562	-0.577699	-0.0685088	-0.609221	-0.568094	2.60285	2.08855	-0.289327	-0.60583
MAP4K4	-0.435902	-0.465048	0.916587	-0.417887	-0.429932	-0.341992	-0.694529	-0.427888	-0.154363	-0.157684	-0.415923	-0.300528	2.3756	2.37164	-0.610314	-0.811836
LINC01127	-0.445273	-0.445273	0.126009	-0.445273	-0.445273	-0.17037	-0.445273	-0.29504	-0.445273	-0.0506494	-0.440965	-0.445273	3.29391	1.45276	-0.355878	-0.442868
IL1R2	-0.538856	-0.538586	1.53218	-0.543796	-0.542793	-0.361599	-0.539771	-0.147021	-0.538412	-0.015737	-0.537647	-0.53406	2.15738	2.22307	-0.533091	-0.541268
IL1R1	-0.530987	-0.562754	1.00516	0.493561	-0.521431	-0.472942	-0.313606	-0.557189	-0.578148	-0.165156	-0.575149	-0.578148	2.74386	1.74538	-0.557287	-0.575153
IL1RL1	-0.558806	-0.45138	-0.281043	-0.605717	-0.567789	-0.562454	0.664353	-0.605717	-0.605717	1.05186	0.114141	-0.605717	3.02808	1.0127	-0.424216	-0.602581
IL18R1	-0.240783	-0.318787	0.409975	-0.478969	-0.487629	-0.436358	-0.376933	-0.479371	-0.449117	-0.426361	-0.470319	-0.476487	2.80913	2.15035	-0.24028	-0.488054
IL18RAP	-0.292402	-0.383136	1.56738	-0.548764	-0.561478	-0.539988	-0.556433	-0.543831	-0.55617	-0.539077	-0.563049	-0.564115	2.33728	1.91123	0.381465	-0.54891
AC007278.2	-0.432227	-0.463037	2.07637	-0.500047	-0.500047	-0.475853	-0.498047	-0.500047	-0.500047	-0.472658	-0.495316	-0.500047	2.33504	1.54257	-0.118663	-0.497951
AC007278.1	-0.472336	-0.441047	1.56362	-0.50033	-0.512176	-0.499779	-0.515809	-0.507904	-0.485817	-0.490759	-0.509218	-0.520256	1.77067	2.53523	0.105791	-0.519891
MFSD9	-0.376824	-0.116975	2.90359	-0.872482	-0.545784	-0.503887	-0.304191	-0.341919	-0.263956	-0.507597	-0.400099	-0.749065	1.49088	1.19434	-0.233308	-0.372721
MRPS9	0.0330514	0.48001	-1.12357	1.68479	2.27587	-0.262395	0.252158	-0.685093	-0.00618394	-0.382376	0.996079	-0.315209	-1.23768	-1.23768	0.250657	-0.722435
TGFBRAP1	-0.158189	0.243264	-0.188824	-1.1626	0.967558	0.300866	2.26982	-0.426804	-0.166255	0.0945782	1.78311	-0.453144	-1.15642	-1.23568	0.20515	-0.916426
C2orf49	0.0495352	0.013544	0.268463	-0.91404	0.00222371	-0.488226	-0.226175	-0.126502	-0.151087	-0.485564	0.744332	2.32408	-1.27115	0.737295	1.38909	-1.86583
FHL2	-0.4586	-0.35083	-0.469252	-0.0137128	2.7295	-0.490014	0.727227	-0.500986	-0.474479	-0.409118	2.10546	-0.500986	-0.450479	-0.445075	-0.500986	-0.497658
NCK2	1.64886	1.56209	-0.101702	-1.09885	-0.951154	-0.588761	-0.524104	-0.689247	0.182183	-0.647921	-0.748432	2.07316	0.0125115	0.119591	0.67143	-0.919665
UXS1	1.68748	0.249873	0.0458629	-1.57676	0.00403234	0.719801	1.17662	-0.463204	0.0380771	0.140079	1.84847	-0.488679	-1.20694	-0.956136	-0.0200096	-1.19856
ST6GAL2	-0.416141	-0.416141	-0.416141	-0.416141	0.713489	-0.410791	0.925549	-0.416141	-0.360199	-0.111293	3.40466	-0.416141	-0.416141	-0.416141	-0.416141	-0.416141
SULT1C4	-0.28857	-0.248615	-0.300318	-0.323718	-0.26575	-0.0758206	3.72341	-0.254608	-0.323718	-0.125704	0.102007	-0.323718	-0.323718	-0.323718	-0.323718	-0.323718
GCC2	1.41364	2.29194	-0.4907	-0.926422	-0.586127	-0.738394	-0.274406	-0.959174	0.441188	-0.566826	-0.354236	0.673697	-0.553985	-0.0717946	1.5982	-0.896606
LIMS1	-0.662604	-0.835893	2.09569	-1.20351	0.0783827	0.0131767	0.568252	0.14401	-0.962129	0.402658	1.52734	-0.947575	0.289617	1.26616	-0.670514	-1.10307
RANBP2	0.532372	0.947294	1.21448	-1.62212	0.539064	0.467508	0.124959	-0.61308	0.203071	0.0442234	1.86145	-0.275729	-0.857645	-0.640097	0.0927365	-2.01848
CCDC138	-0.283717	-0.0406877	-0.753089	-0.722433	2.52808	-0.156137	0.517254	-0.926537	0.374202	-0.479217	1.90385	0.334327	-0.901203	-0.96949	0.198876	-0.624079
RGPD5	0.27244	0.519929	-0.322756	-0.703794	-0.447819	-0.365391	0.146331	-0.828117	0.415037	-0.210452	0.326535	3.35964	-0.516218	-0.828117	-0.165564	-0.651684
MTLN	0.411437	0.602154	-1.37203	-1.24256	1.07063	1.11345	0.192167	1.7098	0.108491	0.173752	0.918962	-0.284761	-1.4441	-1.52218	0.122	-0.557195
BUB1	-0.553331	-0.560427	-0.311757	-0.645046	1.79223	2.48483	-0.220102	-0.645046	-0.536537	-0.407617	1.52881	-0.645046	-0.605483	-0.645046	0.0965351	-0.126959
MIR4435-2HG	-0.957427	0.262958	-0.781396	-0.7812	2.55099	0.170965	-0.0303442	0.509781	-1.21846	0.274514	1.66405	-1.24689	-0.329798	-0.0184661	-0.0492883	-0.0199926
BCL2L11	-0.431334	0.944275	-1.04794	0.282884	1.60903	-0.185281	-1.3483	-0.655724	0.393385	0.52988	0.0970087	-0.0294009	-1.06967	-1.67401	1.55623	1.02896
AC068491.4	-0.782503	-0.302167	0.525111	-0.532535	0.599051	0.00669688	0.129122	-0.781892	-0.655035	0.683832	3.24619	-0.842829	-0.218087	-0.0769742	-0.663108	-0.334868
ANAPC1	0.702528	0.698603	-1.18342	-1.02148	1.79047	0.630436	0.575255	-0.305239	0.062788	0.0769198	1.71435	-0.758016	-0.98492	-1.41658	0.371653	-0.953347
MERTK	-0.571977	-0.56854	-0.335819	-0.468452	-0.469161	-0.493786	0.281449	2.60422	-0.594908	1.60328	-0.258193	-0.594908	-0.515766	-0.594908	-0.571837	1.5493
TMEM87B	0.788266	0.464164	2.25976	-1.88055	-0.966829	-0.433494	0.0880907	-0.587588	0.953563	-0.0281352	-0.161906	0.795259	-0.85425	0.821069	-0.253678	-1.00374
FBLN7	3.73827	0.0113113	-0.207497	-0.29489	-0.29489	-0.260089	-0.29489	-0.29489	-0.179236	-0.21339	-0.281701	-0.29489	-0.248555	-0.29489	-0.29489	-0.29489
ZC3H8	0.920616	0.468407	-0.777699	-0.968101	0.593272	-0.33126	0.46527	-0.439631	0.806597	-0.30117	1.79831	0.624453	-1.39058	-1.46934	1.23771	-1.23686
ZC3H6	0.37345	1.46333	1.82726	-1.01653	-0.89642	-0.557847	-0.58617	-1.06671	0.22069	-0.0259581	-0.62639	1.20517	0.350043	-0.0867368	1.04557	-1.62275
TTL	-0.694351	-0.298883	-0.461626	-1.09155	0.581489	1.01177	-0.411968	0.376276	0.220795	1.21633	1.79206	1.10971	-1.0719	-1.54905	0.520138	-1.24925
POLR1B	0.0464313	0.373313	-1.23767	-1.05232	1.06581	0.42716	0.455983	-0.211237	0.336603	-0.433924	1.99263	1.15025	-1.23021	-1.39642	0.736766	-1.02315
CHCHD5	-0.113743	0.411141	-0.728831	-1.45547	-0.00199374	1.34736	0.343218	2.04542	-0.447332	1.40325	0.463435	-0.584567	-1.11728	-1.18002	0.36048	-0.745064
SLC20A1	0.187483	1.33068	-0.720067	0.62384	0.930837	0.637375	-0.296186	-0.241866	-1.04969	0.573225	0.0896912	-1.2499	-0.633322	-0.954329	2.15485	-1.38261
CKAP2L	-0.538032	-0.642949	-0.338222	-0.511968	1.67734	1.42644	-0.157356	-0.649622	-0.649622	-0.523522	2.43371	-0.58526	-0.608987	-0.649622	0.799448	-0.481776
IL1B	-0.735893	-0.724028	-0.662072	-0.737447	0.396454	-0.271917	1.37739	1.66888	-0.700746	0.452523	2.38972	-0.737447	-0.0946616	-0.172029	-0.71282	-0.7359
IL1RN	-0.531683	-0.518086	0.60643	-0.533059	-0.532451	-0.153607	-0.529237	-0.0705224	-0.527321	0.161312	-0.529839	-0.533059	2.85867	1.89672	-0.533059	-0.531206
PSD4	-0.160948	0.41762	0.666423	-1.26533	-0.897569	-0.430187	-0.852312	-0.37669	0.0394804	-0.493971	-0.759474	-0.10386	1.72365	1.87342	1.61173	-0.991981
IGKV1OR2-108	-0.252858	-0.252858	-0.252858	-0.252858	-0.248311	-0.252858	-0.252858	-0.252858	-0.214361	-0.252858	-0.252858	-0.252858	-0.252858	-0.252858	-0.252858	3.74983
CBWD2	0.178473	0.187276	-1.14523	-1.26913	0.933292	0.309688	-0.144976	2.11627	0.340949	0.0562697	-0.473515	1.61185	-1.35949	-1.31448	-0.127938	0.100683
WASH2P	-0.460512	-0.0471021	-0.137397	-0.879035	1.04022	0.306559	2.13691	0.847477	-0.498813	0.574052	-0.791326	-0.831135	-0.922396	-0.615422	1.61713	-1.33921
SLC35F5	-0.866293	0.238977	1.84279	-1.41342	-1.06796	0.207316	0.0636465	-1.11234	1.13095	0.648559	0.427846	1.33127	-1.1091	0.268194	0.493005	-1.08344
ACTR3	-0.382776	-0.349076	2.20803	-0.770571	-0.651818	-0.0625956	-0.663762	-0.334854	-0.408374	-0.13992	-0.499559	-0.429032	1.19766	2.32943	-0.163207	-0.879587
AC110769.3	-0.490491	-0.422236	1.63743	-0.536852	-0.466011	-0.389376	-0.452902	-0.536852	-0.505186	-0.26318	-0.417763	-0.366176	1.38671	2.78026	-0.426387	-0.530987
DDX18	0.869303	0.889896	-1.3919	-1.34374	0.692208	0.00863284	0.289668	0.161868	0.853698	-0.0977621	0.856351	1.3678	-1.57299	-1.51141	0.677015	-0.748633
CCDC93	0.00890735	0.293269	1.57244	-1.9775	-1.1344	-0.22868	-0.175967	-0.410049	0.330605	-0.292619	-0.246816	1.14424	0.395099	1.50236	0.773457	-1.55435
INSIG2	0.170515	0.411205	1.27769	-2.65522	-0.667587	-0.895451	0.175961	-0.668215	0.358252	-0.276091	0.453131	1.37127	0.0220679	1.02339	0.674445	-0.775357
MARCO	-0.420784	-0.420784	-0.113674	-0.420784	-0.420784	-0.0398759	-0.420784	2.63328	-0.420784	2.45217	-0.420784	-0.420784	-0.309644	-0.420784	-0.420784	-0.414408
STEAP3	-0.702146	-0.726557	-0.655017	0.142876	2.93861	0.586127	-0.0638596	0.826715	-0.726557	0.254101	1.1421	-0.726557	-0.726557	-0.269134	-0.665767	-0.628378
C2orf76	-0.594914	0.274861	0.231718	-2.16921	-0.62551	-0.665389	0.543468	-0.0960638	0.710369	-0.0757659	0.237534	0.913291	0.437249	2.22499	0.108799	-1.45543
DBI	-0.415716	0.290123	-0.827014	-1.35839	-0.937224	1.99395	-0.197061	1.63148	-0.237072	1.08094	-0.535723	0.502429	-0.738035	-0.650512	1.16015	-0.762329
TMEM177	0.130364	0.111957	-1.02065	-0.823739	1.41684	-0.377142	1.31365	-0.561453	-0.400926	-0.72019	0.938489	2.24138	-1.08642	-1.08642	0.198925	-0.274654
PTPN4	0.273813	1.4769	-0.52002	-0.0970111	-0.353348	-0.459464	-0.31294	-0.523025	-0.319331	-0.421242	-0.190273	-0.0422914	-0.603131	-0.640982	3.22784	-0.495493
TMEM185B	0.615359	-0.223816	1.89113	-1.88514	-0.153984	-0.146174	0.960477	-0.57853	-0.697535	-0.45836	0.77846	1.05679	0.945493	-1.0192	0.231487	-1.31646
RALB	-0.57035	-0.560596	1.22007	-0.728453	-0.551432	-0.238931	-0.383508	-0.0886471	-0.492032	-0.0800915	-0.299234	-0.477921	2.78232	1.66566	-0.482804	-0.714044
CLASP1	-0.49128	-0.0250237	0.690999	0.0705841	-0.580454	-0.324698	-0.542749	-0.34632	-0.538641	-0.146037	-0.481329	-0.584982	0.409697	0.276599	3.41317	-0.799535
NIFK-AS1	0.405712	0.934516	-0.820039	-1.382	-0.230397	0.11404	1.73851	-0.928665	0.262386	-0.171602	0.481043	1.29015	-1.11057	-0.829648	1.44285	-1.19629
NIFK	0.355432	0.507454	-1.27117	-1.17986	1.11899	0.496739	1.02262	-0.32967	0.00271535	-0.27136	2.01025	0.3194	-1.31338	-1.34827	0.710807	-0.830713
TSN	-0.149962	0.238454	-0.0390242	-1.25276	1.36011	1.01454	0.950909	0.0720915	-0.590896	0.293868	1.48885	0.347004	-1.51477	-1.55427	0.631689	-1.29584
GYPC	0.18987	0.296084	-0.81621	2.83704	1.73306	-0.383952	0.102559	-0.670536	-0.416428	-0.676063	0.108396	-0.4225	-0.841992	-0.827449	0.289934	-0.501814
BIN1	1.23748	1.49537	-0.771111	-0.781791	-0.749874	-0.481767	0.347461	-0.539313	0.998584	-0.643162	-0.725014	0.546152	-0.781791	-0.754453	2.23695	-0.633722
ERCC3	0.750374	1.58064	-0.781515	-1.42002	0.483869	-0.271612	-0.102984	0.742659	-0.14841	-0.385633	0.00544065	-0.02389	-0.985858	-0.76556	2.36967	-1.04718
MAP3K2	-0.407301	-0.414865	1.18344	-0.718485	-0.651333	-0.322506	-0.580712	-0.460392	-0.24843	-0.091807	-0.550942	-0.334747	2.06653	2.5215	-0.316709	-0.67324
IWS1	-0.178607	0.13213	0.477516	-1.69235	0.281423	0.610672	0.0659826	-0.851007	0.410036	-0.117166	0.930879	1.77007	-0.100103	-1.26351	1.30743	-1.7834
MYO7B	-0.569404	-0.575862	0.370103	-0.584979	-0.583975	-0.563562	-0.560622	-0.584979	0.576201	-0.545371	-0.578455	1.26095	2.71288	1.39704	-0.584979	-0.584979
WDR33	1.0355	1.50015	-0.538732	-1.80408	0.290891	-0.183192	0.633682	-0.668612	0.452997	-0.320738	0.758337	0.762754	-1.35923	-1.04572	1.39224	-0.906247
SFT2D3	0.0176095	0.444752	-0.746221	-1.27222	-0.0665445	-0.128209	0.0842353	-0.653514	0.0378564	-0.0306143	1.45452	2.64348	-1.17605	-0.725437	0.81626	-0.699903
POLR2D	0.281239	0.51831	-1.08535	-1.41764	2.1489	0.707259	1.02853	-0.48621	-0.149936	-0.316643	1.20053	-0.350955	-1.3437	-1.00261	0.643249	-0.374973
AMMECR1L	0.25832	0.267859	0.582703	-0.363935	0.37664	0.0690717	0.0912074	-0.0296931	-0.18046	0.213431	1.87543	1.15665	-1.85384	-0.932904	0.617199	-2.14768
AC012306.2	0.164699	0.154386	-0.399257	1.93122	0.223629	-0.173113	0.639018	-0.759471	-0.4509	-0.250689	2.53526	-0.844167	-0.768498	-1.15932	-0.0348717	-0.807934
SAP130	0.914132	0.713395	0.478103	-2.38897	0.617311	0.841129	-0.0020351	0.38306	-0.763268	-0.155229	0.0307847	-0.782777	0.464337	0.00634591	1.40058	-1.7569
UGGT1	-0.863876	-0.336729	0.616739	1.61721	1.33525	0.726651	-0.752959	-0.599863	-1.06191	0.356809	2.03887	-0.995433	-0.268502	-0.328841	-0.407377	-1.07604
HS6ST1	-0.547824	-0.290304	-1.27071	-1.14921	0.562984	0.510346	1.81252	0.662906	0.548286	0.993993	1.46645	-0.976197	-1.18022	-1.0603	0.441071	-0.523793
SMPD4	0.832853	0.8495	-1.04723	-1.02786	2.42826	0.674273	0.70108	0.00313215	-0.566539	-0.417107	-0.41964	0.0720651	-1.30589	-1.30589	0.689981	-0.160999
MZT2B	0.890569	0.614334	-1.28121	-1.2244	0.662957	1.74911	0.819492	-0.308123	0.101241	-0.185855	1.22967	0.264274	-1.44992	-1.52402	0.213187	-0.571303
CCDC115	0.524164	1.06294	-0.869691	-1.65085	-0.386823	-0.224035	1.23441	1.33182	0.904852	0.0803377	-0.28275	0.756522	-1.28261	-0.977596	1.01076	-1.23146
IMP4	0.0570076	0.266445	-1.33138	-1.57584	1.43824	0.358468	0.249671	0.194303	0.538516	-0.365983	0.73968	1.43177	-1.56157	-1.4762	0.831902	0.204963
PTPN18	-0.458047	0.190049	0.436353	-1.38972	-0.804413	0.827127	-0.439397	2.01465	0.220349	1.46746	-0.653028	-0.359394	-0.94899	-0.608064	1.4554	-0.950333
FAM168B	0.126079	0.676394	-0.00828973	-1.91223	0.302237	0.717709	-0.146721	0.626587	0.190242	0.160247	0.737507	1.11408	-1.36579	-1.77829	1.46707	-0.906839
PLEKHB2	-0.2629	0.155674	0.20678	-1.51831	-0.527238	1.72057	-0.135593	1.9797	-0.631236	1.36521	-0.104042	-0.820903	-0.721198	0.276859	0.331559	-1.31493
MZT2A	1.31641	1.32578	-1.04583	-1.25371	0.950185	1.0685	1.28271	-0.606748	-0.0915718	-0.448329	0.978285	-0.315647	-1.29859	-1.23635	-0.078651	-0.546443
MGAT5	0.323627	0.316888	0.245096	-0.640158	-0.710528	-0.335309	-0.419945	-0.434339	1.54469	-0.483368	-0.538901	3.04897	-0.572504	-0.467805	-0.117502	-0.75891
TMEM163	-0.385082	-0.375151	-0.561987	-0.561987	-0.256155	-0.50605	3.32609	-0.561987	0.0552529	-0.302352	0.757962	0.0167596	-0.561987	-0.561987	0.933375	-0.454723
CCNT2	0.133425	1.30798	0.582226	-1.02896	-0.0661533	-0.840515	-0.559245	-0.96695	0.232456	-0.225175	-0.365476	1.89943	-0.687037	1.05262	1.24539	-1.71402
RAB3GAP1	-0.100483	-1.30434	0.94677	-0.446135	-0.174816	-0.394671	0.114112	-0.609563	0.227753	0.108262	0.528428	2.63174	-0.28063	1.08471	-1.60202	-0.729109
ZRANB3	-0.116457	-0.0151984	-0.916904	-0.711324	1.5125	0.434881	0.547784	-0.937145	0.402569	0.150922	2.67611	0.0980551	-0.989449	-0.989449	-0.493611	-0.653276
R3HDM1	0.321912	0.756799	-0.973379	-1.44261	0.963001	0.550565	0.919906	-0.295441	-0.144676	0.366311	1.78247	-0.319364	-1.43549	-1.41669	1.06704	-0.700348
UBXN4	0.374469	1.29069	-0.308973	-2.90234	0.0842744	0.0423613	0.640159	-0.665041	0.111693	-0.0348703	0.588825	0.191084	-0.502535	-0.560238	1.68794	-0.0374945
MCM6	-0.200706	-0.111665	-0.565242	-0.622746	2.28755	1.77075	-0.0199746	-0.611783	-0.501995	-0.393808	1.83956	-0.592699	-0.650415	-0.697708	-0.383935	-0.54518
DARS	0.417627	-0.109966	-0.490444	-1.50956	1.53487	0.29898	1.77972	-0.372061	0.294046	-0.318343	1.87322	-0.369346	-1.24995	-0.678354	-0.34781	-0.752639
DARS-AS1	-0.287144	-0.318322	1.30203	-0.817146	-0.639207	-0.205418	-0.756909	-0.204851	-0.140699	-0.447152	-0.649167	-0.238577	1.46012	2.83315	-0.186429	-0.704282
CXCR4	1.33493	1.80744	0.354179	-1.20185	-1.22291	-0.353522	-0.662081	-0.95566	1.06601	-0.686937	-0.960781	0.934346	-0.0173758	0.34345	1.07529	-0.854539
HNMT	-0.417542	-0.413536	-0.421308	-0.43355	-0.422196	0.457793	-0.350223	2.71412	-0.43355	2.26749	-0.42132	-0.43355	-0.394838	-0.43355	-0.43355	-0.430685
SPOPL	-0.58107	-0.522043	1.40213	-0.649864	-0.591684	-0.262735	-0.537553	-0.361641	-0.329931	-0.0314712	-0.460457	-0.388866	1.80144	2.61052	-0.429751	-0.66702
AC092620.1	-0.522898	-0.595211	1.53404	-0.662545	-0.589724	-0.354677	-0.447218	-0.384302	-0.396386	0.0125715	-0.302549	-0.662545	2.44616	1.89063	-0.329521	-0.635821
KYNU	-0.873199	-0.804182	-0.871968	-0.880058	0.550039	0.397185	-0.568427	1.49414	0.924159	1.95241	1.02897	0.856264	-0.85297	-0.70216	-0.821153	-0.829047
ARHGAP15	1.30582	0.655064	1.29615	-1.52432	-0.946504	-0.714657	0.0510152	-1.10546	0.109338	-0.88794	-0.305494	1.08706	1.19386	0.651132	0.550346	-1.41541
GTDC1	-0.479126	0.449855	1.30662	-0.905015	-0.256794	-0.657343	-0.391759	-0.514307	-0.456176	-0.574303	-0.367162	-0.262315	2.6706	1.50762	-0.0844687	-0.985921
ZEB2	-1.17033	0.0507765	-0.548681	-0.918411	-0.262848	1.15239	-0.201506	0.665743	-0.771398	2.29621	1.26341	-0.816224	-0.0892048	-0.345516	0.919856	-1.22426
AC009951.1	-0.955838	-0.46023	-0.0957456	-0.978593	-0.606633	1.69877	-0.479212	0.352948	-0.871141	2.20204	1.0238	-0.923554	0.878368	-0.0571976	0.248927	-0.976709
ZEB2-AS1	-0.745652	0.175057	-0.572879	-0.806766	-0.420784	1.63557	-0.436675	1.99881	-0.413917	1.83595	-0.329957	-0.483947	-0.69948	-0.806766	0.862898	-0.791453
ORC4	0.00145596	0.285535	-0.411528	-1.19859	2.05412	-0.645666	0.179823	-0.945676	0.00772998	-0.586244	1.88603	0.628944	-0.832426	0.38149	0.667711	-1.4727
MBD5	-0.435254	-0.000344241	1.63296	0.607581	-0.135043	-1.00895	-0.566173	-1.43341	-0.566798	-0.618443	0.533613	0.139458	1.11023	1.63177	0.791966	-1.68316
EPC2	0.768714	0.0695685	0.532966	-0.48387	-0.987927	-0.902415	-0.759031	-0.950066	-0.203522	0.105494	0.274863	0.235985	1.60732	1.77795	0.888566	-1.9746
KIF5C	3.27782	1.41603	-0.0137733	-0.463693	-0.458111	-0.422592	-0.332357	-0.463693	0.31224	-0.413007	-0.399163	-0.463693	-0.463693	-0.463693	-0.184928	-0.463693
LYPD6B	-0.359615	-0.279406	-0.32204	-0.359615	-0.344984	-0.359615	0.253015	-0.359615	0.657401	-0.323865	-0.359615	-0.359615	-0.359615	-0.359615	-0.359615	3.59642
MMADHC	-0.624686	-0.202853	1.98947	-0.156097	1.83241	-0.884148	0.409423	-1.21281	-1.08615	-1.03585	0.53631	0.00579885	0.741801	0.861169	-0.207982	-0.965806
RBM43	0.778339	1.8642	-0.903268	-1.30176	0.127455	-0.560444	0.224828	-0.256595	0.538848	-0.440793	0.712551	1.48708	-1.19116	-0.982629	1.03999	-1.13664
NMI	-0.632896	-0.442843	1.03962	-1.24492	0.164105	-0.133667	0.12226	-0.251311	-0.695687	-0.1516	1.28619	-1.03755	1.83909	1.80404	-0.391149	-1.27368
TNFAIP6	-0.463011	-0.4648	0.872994	-0.461308	-0.461683	-0.401575	-0.463684	-0.347714	-0.462251	-0.236884	-0.461641	-0.4648	1.87507	2.8702	-0.4648	-0.464115
RIF1	-0.233189	-0.195106	0.866048	-1.10321	1.60645	0.927091	0.179581	-0.619795	-0.30599	0.171952	2.36474	-0.485595	-1.0798	-1.03366	-0.119165	-0.940363
ARL5A	0.179757	0.70982	-1.07413	-1.98195	0.883554	0.323246	0.361534	0.897472	0.380132	0.168602	0.00221832	0.327745	-1.65845	-1.55886	1.12069	0.918613
STAM2	-0.891568	-0.015762	1.74176	-1.12027	-0.946595	0.0996114	-0.720554	-0.801861	-0.392527	0.905129	-0.278421	-0.101303	1.52863	1.5829	0.64643	-1.2356
FMNL2	-0.406302	-0.353172	-0.420149	-0.476363	-0.447147	-0.323009	-0.0171328	2.12418	-0.112141	2.90111	-0.386129	-0.476363	-0.476363	-0.476363	-0.419279	-0.235371
PRPF40A	-0.434968	0.0747785	0.582583	-1.92303	0.849085	1.40732	0.077984	-0.208747	-0.519666	0.476517	1.97797	-0.260325	-0.377365	-0.475075	0.470465	-1.71753
ARL6IP6	-0.243412	0.0332913	1.9369	-1.45286	1.33175	-0.190961	-0.329376	-1.03535	-0.401537	-0.597754	0.428204	0.0891129	0.854898	1.49792	-0.432405	-1.48842
NR4A2	0.567045	1.15346	-0.0363671	-1.18872	-0.946065	0.511029	-0.430565	0.676048	1.54605	0.444006	-0.106876	-0.985742	-0.890521	-0.966559	1.84734	-1.19356
GPD2	-0.621254	-0.489375	2.89386	-1.0027	-0.47536	1.11076	-0.401122	-0.0300871	-0.748309	0.420693	0.305857	-0.528985	-0.181683	1.10972	-0.492829	-0.86918
GALNT5	-0.268435	-0.278176	-0.275082	3.74132	-0.00153752	-0.277006	-0.226384	-0.278176	-0.278176	-0.268788	-0.236184	-0.278176	-0.268864	-0.278176	-0.25735	-0.27081
CYTIP	1.72073	2.07966	-0.574098	-0.942308	-0.924532	-0.763329	-0.74235	-0.191492	-0.17995	-0.3559	-0.887369	-0.0709627	0.678375	0.0343062	1.66238	-0.543157
PKP4	-0.526536	-0.467128	1.53884	-0.788522	1.38671	1.63137	0.248456	-0.486218	-0.881198	0.0304717	1.77924	-0.961222	-0.38496	-0.798132	-0.429051	-0.892126
TANC1	-0.350044	-0.25988	-0.515216	-0.617848	0.391833	-0.240711	3.26924	-0.617848	-0.319018	0.466775	1.04238	-0.617848	-0.617848	-0.617848	0.156695	-0.552817
WDSUB1	-0.0319774	0.982721	-0.781833	-0.880192	-0.0676708	-0.351256	0.258592	-0.277079	0.452283	-0.0650762	0.055929	0.208807	-0.843576	-0.96072	3.13018	-0.829134
BAZ2B	-0.714942	-0.460721	2.3314	-0.474521	-0.681009	-0.160444	-0.323718	-0.48209	-0.768923	0.235542	-0.249891	-0.609578	2.00598	1.40961	-0.264516	-0.792188
2007-03-01	-0.286822	-0.0205722	1.32985	-0.650865	-0.784326	-0.596668	-0.484719	-0.760543	-0.498298	-0.187869	-0.189199	-0.17141	2.18279	1.83215	0.695862	-1.40936
CD302	-0.676464	-0.668352	0.308286	-0.686069	-0.577758	1.33909	-0.300255	2.13562	-0.69063	2.14608	-0.463196	-0.656701	0.289716	-0.143814	-0.687684	-0.667862
LY75	0.60161	1.25278	0.580165	-1.48685	-0.943451	0.309279	0.168859	-0.780255	0.0739653	-0.0221797	-0.106318	2.14764	-0.840658	-0.950404	1.15086	-1.15504
RBMS1	0.0263881	-0.0966642	1.26995	-0.859411	-0.707408	-0.267175	-0.641347	-0.147914	-0.766034	0.0407155	-0.694327	-0.608655	2.5559	1.65827	0.175406	-0.937702
TANK	-0.540865	-0.275489	1.76276	0.512631	-0.860497	-0.35516	-0.827678	-0.380315	-0.479705	-0.0147798	-0.869954	0.331539	1.58382	2.08417	-0.503079	-1.16739
LINC01806	0.828395	1.22623	-1.07752	-0.0234414	0.439875	-0.471205	2.62528	-0.585058	0.399509	-0.660783	0.492551	0.168111	-1.08787	-1.08787	-0.767862	-0.418343
PSMD14	-0.220158	0.185666	-0.975373	-0.974314	1.65359	1.54879	0.0328251	-0.199769	0.0123106	0.0414333	1.99652	-0.712319	-1.35593	-1.21474	0.181092	0.000370425
DPP4	3.6326	0.672119	-0.34471	-0.270883	-0.300198	-0.283635	-0.279948	-0.33309	-0.364638	-0.220365	-0.269131	-0.364638	-0.274309	-0.364638	-0.273005	-0.361535
IFIH1	0.193131	0.456787	-1.02384	-0.610186	-0.478907	-0.195682	0.0493009	-0.445488	1.80241	0.337896	-0.013204	2.6463	-0.657539	-1.32518	-0.226705	-0.509091
GCA	-0.528013	-0.543348	1.99774	-0.546874	-0.531824	-0.332003	-0.489756	-0.275133	-0.492633	-0.193338	-0.518384	-0.475694	2.05063	1.96416	-0.539245	-0.54629
FIGN	-0.494199	-0.55766	2.28529	-0.55766	-0.124436	-0.54704	2.44446	-0.55766	-0.239891	0.185387	0.866607	-0.55766	-0.472555	-0.55766	-0.55766	-0.55766
COBLL1	-0.527879	-0.5055	-0.514402	-0.386509	-0.240424	-0.365426	0.00657368	-0.529097	1.7025	-0.352051	-0.381251	3.01734	-0.53622	-0.53622	-0.526662	0.675236
SCN3A	-0.364811	-0.372137	-0.372137	-0.372137	-0.352708	-0.362483	0.0424372	-0.372137	0.980995	-0.33832	-0.182677	3.5233	-0.372137	-0.372137	-0.372137	-0.340769
GALNT3	-0.689965	0.118989	1.50914	-0.778896	-0.822132	-0.260329	-0.59145	-0.766758	-0.415262	-0.476424	-0.633332	0.157349	1.47871	2.49053	0.422285	-0.742459
TTC21B	0.572235	0.541435	-1.21716	-1.41293	0.975474	0.295959	0.295144	-0.470756	0.909499	0.138566	1.40143	-0.235946	-1.1636	-1.52606	1.58913	-0.692428
SCN9A	-0.609496	-0.617592	0.395025	-0.617592	-0.482474	-0.0456881	2.93363	-0.617592	-0.545613	0.470669	-0.182882	-0.617592	0.0760599	1.67603	-0.617592	-0.597307
XIRP2	-0.354969	-0.354969	-0.339067	0.0807648	-0.111312	-0.354969	3.69609	-0.354969	-0.354969	-0.121199	0.162441	-0.354969	-0.354969	-0.354969	-0.172997	-0.354969
STK39	0.353458	1.79512	-0.643648	-0.734627	-0.433343	0.422349	-0.343059	-0.485004	-0.275254	-0.0479279	-0.0817013	-0.194782	-0.770131	-0.782689	2.86906	-0.647824
CERS6	-0.112054	-0.793495	-0.680211	-0.939949	-0.100857	2.04962	1.49684	0.371423	-0.659186	1.65462	0.857672	-0.0934938	-0.904323	-0.930811	-0.405326	-0.810473
SPC25	-0.546372	-0.664344	-0.519616	-0.526307	1.90478	1.94828	-0.137773	-0.568366	-0.644726	-0.56452	1.82228	-0.664344	-0.664344	-0.530882	0.754347	-0.398093
DHRS9	-0.49871	-0.499407	1.94821	-0.481558	-0.50348	-0.45956	-0.489656	-0.449572	-0.489194	-0.466717	-0.487504	-0.460297	1.72613	2.32119	-0.499551	-0.210322
FASTKD1	-0.242134	0.0745561	-1.20195	-0.92146	1.66823	0.922247	0.826229	0.0672805	-0.135702	0.344586	2.02379	-0.627379	-1.15682	-1.45411	0.241431	-0.428789
PPIG	0.241814	0.851664	-0.421382	-1.85345	0.854502	0.552751	0.48613	-0.459856	0.919383	-0.060701	1.4503	0.266079	-1.15324	-0.55119	0.822909	-1.94571
PHOSPHO2	1.09181	0.653376	-1.06607	-0.546219	0.563958	-0.536517	2.27288	-0.247413	-0.121093	-0.388609	1.02693	0.739801	-1.27001	-1.32221	0.132648	-0.98326
KLHL23	-0.493679	-0.490312	-0.536731	-0.34253	1.35995	0.0764521	1.50369	-0.592032	-0.316758	-0.199314	2.81843	-0.592032	-0.561524	-0.592032	-0.496157	-0.545419
SSB	0.206268	0.130736	-1.07149	-0.624804	1.65063	0.174999	0.956202	-0.194628	0.134671	-0.107359	2.29194	0.00962693	-1.32342	-1.36989	0.0215475	-0.885013
METTL5	0.139769	0.349582	-1.14203	-0.828346	1.83048	-0.395676	0.752201	0.395465	-0.0974274	-0.484776	1.83429	0.438982	-1.45371	-1.44071	0.61776	-0.515862
UBR3	0.240795	0.3178	0.846009	-0.374391	-0.206465	-0.853695	-0.515549	-1.09369	-0.444305	0.404406	0.163428	0.539728	-0.456443	0.76938	2.57345	-1.91046
GAD1	-0.338738	-0.338738	-0.322483	-0.338738	3.53681	-0.322434	-0.278369	-0.338738	-0.338738	-0.234061	1.00323	-0.338738	-0.338738	-0.338738	-0.338738	-0.334053
GORASP2	0.944086	1.12353	-1.17617	-1.44252	0.338821	0.34812	0.507336	-0.612484	0.00732033	-0.341441	0.489755	-0.214839	-1.49508	-1.32493	1.24636	1.60214
TLK1	0.130093	-0.16511	0.0244461	-1.64823	-0.335008	-0.363913	-0.0129298	-1.26463	1.4248	-0.628353	0.415786	2.58806	0.321245	0.525651	-0.184147	-0.82777
METTL8	-0.246191	-0.409364	-0.74329	-0.780744	0.00919355	-0.111084	-0.0911949	-0.444832	2.58889	-0.205416	0.457323	2.22362	-0.776817	-0.823666	-0.29035	-0.35608
DCAF17	0.578645	1.25643	-1.11096	-1.27821	0.239998	0.10042	0.292884	-0.48678	1.16324	0.136134	1.28096	0.151083	-1.43545	-1.43545	1.39649	-0.849442
CYBRD1	-1.04802	-1.05974	-0.196908	1.00701	0.678481	1.30598	1.5865	0.822679	-0.98652	1.35441	0.158313	-1.05974	0.088737	-0.914308	-0.697989	-1.03887
DYNC1I2	-0.269131	-0.318307	0.302727	-0.319745	-0.0850966	1.14234	0.327713	1.06539	-0.0654236	1.35689	1.42752	-0.00620054	-1.84544	-1.39824	0.33474	-1.64975
SLC25A12	0.549256	0.886212	-1.046	-1.53843	-0.139678	0.431531	1.05545	0.701623	0.86489	-0.221225	0.103475	-0.274093	-1.24178	-1.44385	1.9348	-0.622183
HAT1	-0.41118	0.0594819	-0.052732	-1.93695	2.5583	1.10713	0.08208	-0.182347	-0.436175	-0.422016	0.651008	-0.513395	-0.171937	0.406108	0.564087	-1.30146
METAP1D	0.180982	-0.41527	-0.799705	-0.806972	2.38647	-0.504777	1.2079	-0.667806	0.785775	-0.270817	1.74251	-0.126345	-0.806972	-0.806972	-0.567811	-0.530196
ITGA6	1.14551	0.0494698	1.5805	-0.88612	-0.80611	-0.702371	-0.272835	-0.865573	-0.951793	-0.687114	-0.353542	-0.938353	-0.481551	1.42278	1.26781	1.47929
AC078883.1	0.101123	0.422544	-0.375239	-0.211123	-0.615414	-0.662703	-0.493064	-0.380873	0.0106369	-0.57484	-0.605008	-0.299691	0.355938	-0.553634	0.412975	3.46837
PDK1	-0.230373	-0.348918	0.922727	-0.994141	-0.621445	-0.629898	-0.809615	-0.691033	-0.437853	-0.485976	-0.543744	0.263813	0.762783	1.1684	-0.203597	2.87887
MAP3K20	-1.10588	-0.946617	-1.02412	-0.293612	0.935398	2.024	0.104692	0.912836	-0.49762	1.46381	0.589108	-0.459044	0.808821	-0.460882	-0.946852	-1.10404
CDCA7	-0.562552	-0.394471	-0.594517	-0.445634	0.917751	2.00179	1.77102	-0.59018	-0.6438	-0.26905	1.7915	-0.700158	-0.678442	-0.700158	-0.23155	-0.671542
SP3	-0.430855	-0.188115	1.43305	-0.926049	-0.552286	-0.302526	-0.641892	-0.711127	-0.324373	-0.00106897	-0.312292	-0.347181	1.62178	2.61231	-0.0499403	-0.879435
OLA1	0.0831312	-0.244437	-0.920257	-0.948779	1.90373	0.245708	1.77784	0.26333	-0.484793	-0.0271977	1.72627	-0.251651	-1.10086	-1.12925	-0.215137	-0.677641
CIR1	-0.483202	0.323374	-0.591703	0.59177	-0.864172	-0.909893	0.00450705	0.0203643	-0.245333	-0.213238	-0.640552	0.0362604	2.81411	1.31177	0.307076	-1.46115
SCRN3	0.0669077	0.674948	-0.708485	-1.86408	1.44782	0.461763	1.24969	0.117888	-0.27982	-0.0539287	1.5251	0.165939	-0.694078	-1.86408	0.235562	-0.481136
GPR155	1.45132	0.617898	-0.718248	-0.91264	0.022994	-0.788749	-0.578166	0.204403	-0.691735	0.432738	-0.0220367	-0.640057	2.91154	-0.342898	-0.321567	-0.6248
WIPF1	0.104269	0.846589	0.65789	-1.108	-0.965976	-0.58982	-0.733302	-0.337349	-0.378835	-0.222874	-0.673739	-0.473712	2.11184	1.94074	0.795943	-0.973667
H3F3AP4	-0.870714	-0.569817	-0.121564	-1.17232	0.0172436	-0.0398955	0.0738688	0.658502	-0.453861	0.0870848	0.823635	-0.872948	1.60498	2.46275	-0.329457	-1.29748
ATF2	0.0837277	0.908899	0.113327	-1.13923	-1.08162	0.947063	0.128631	-1.6005	0.446979	0.0401801	1.07779	1.06017	-0.103809	-0.677676	1.51565	-1.71959
ATP5MC3	-0.286106	-0.0742275	-1.1733	-1.29105	1.81889	0.978328	0.585961	1.47048	-0.371746	0.426842	1.05127	-0.50685	-1.24986	-1.33358	0.169766	-0.214816
LNPK	-0.344471	-0.142651	3.36441	-0.141825	-0.215444	0.217017	-0.565051	-0.755369	-0.45462	0.091292	-0.229871	-0.994834	0.314683	0.708221	-0.0272731	-0.824215
AC016739.1	1.00911	0.385517	-1.05901	-0.997241	0.562342	0.713991	0.888331	2.26204	0.860902	-0.641914	-0.537195	-0.116366	-1.21552	-1.21552	-0.157963	-0.741511
MTX2	-0.0587486	0.0246115	-0.994106	-1.26467	1.95881	0.197935	1.30762	-0.0265384	0.354366	-0.224709	1.66574	-0.658914	-1.17188	-1.26467	0.552925	-0.39778
HNRNPA3	-0.160024	0.479137	-0.452019	-1.70911	1.10805	1.62898	0.248097	-0.296123	-0.030462	0.146811	1.84555	0.0725253	-1.14859	-1.0128	0.520557	-1.24058
NFE2L2	-0.590663	-0.0862008	-0.592772	-0.73202	-0.414386	-0.0715419	0.136634	0.618513	-0.878651	0.974524	-0.430349	-0.326312	2.49601	0.895065	0.849389	-1.84724
AC019080.1	-0.450127	-0.605907	0.707897	-0.816619	-0.112844	0.353152	2.8113	-0.441029	-0.409318	0.853781	1.26632	-0.816619	-0.816619	-0.816619	0.0184548	-0.725205
AGPS	-0.442998	-0.295339	1.89325	-0.688021	-0.138019	0.414367	2.77465	-0.399611	-0.634565	0.264157	0.340692	-0.710005	-0.713276	-0.588335	-0.335694	-0.741247
PRKRA-AS1	-0.044839	0.396986	-0.878719	-0.83315	-0.143583	2.02955	1.55109	-0.236206	-0.0414583	0.620493	1.59694	-1.08332	-1.08332	-1.08332	-0.281663	-0.485474
PRKRA	0.85701	0.629787	-1.28877	-1.0123	1.17662	-0.169385	0.632631	-0.390173	0.710819	-0.460198	1.52294	1.38828	-1.42809	-1.36759	-0.293782	-0.507795
FKBP7	-0.36097	-0.319354	-1.0783	-1.12446	0.835544	0.746354	2.05381	-0.0636188	-0.473603	-0.0169357	1.65425	-0.324918	-0.977972	-1.12446	-0.552506	1.12713
PLEKHA3	-0.20092	1.06331	1.21506	-2.43984	-0.300841	-0.350123	0.442789	-0.817571	0.0524275	0.401452	0.396188	0.929167	-0.428594	0.851095	0.797146	-1.61075
TTN-AS1	-0.316428	-0.229844	3.14887	-0.696935	-0.495404	-0.20067	-0.356759	-0.569204	-0.382426	-0.293484	-0.41989	-0.275181	0.587663	1.51626	-0.330107	-0.686458
TTN	0.558751	0.223125	-0.238998	-0.655373	-0.664371	-0.530394	-0.214346	-0.635638	3.12136	0.105103	-0.331517	1.37601	-0.522712	-0.561005	-0.287987	-0.742007
AC009948.2	-0.477332	-0.435212	3.00658	0.286056	-0.513743	-0.323346	-0.537208	-0.538131	-0.452619	-0.227006	-0.494773	-0.582254	0.499816	1.7241	-0.380416	-0.554509
AC009948.4	-0.355572	-0.424709	3.61585	-0.518157	-0.459374	0.0156346	-0.259949	-0.384714	-0.267286	-0.10281	-0.237852	-0.338133	0.554483	0.00715068	-0.36579	-0.478779
AC010680.3	-0.355237	-0.35057	3.56168	-0.459568	-0.403388	0.129848	-0.3187	-0.459568	-0.410692	-0.14296	-0.321691	-0.459568	0.201095	0.660821	-0.459568	-0.41193
CCDC141	0.471559	0.278704	-0.59663	-0.59663	-0.59663	-0.461573	-0.12133	-0.556761	2.38955	-0.183578	-0.149453	2.44484	-0.59663	-0.59663	-0.532172	-0.59663
SESTD1	-1.00287	-1.03898	-0.0626744	-1.17723	-0.0702603	0.885287	-0.500107	0.996601	0.115549	1.45143	0.819091	2.06814	-0.785495	0.159165	-0.759846	-1.0978
CWC22	0.304279	1.01545	0.644971	-2.08594	-0.0224796	-0.0531844	-0.163259	-0.87762	0.295009	-0.219498	0.756305	1.6006	-0.231039	-0.339052	1.21686	-1.8414
UBE2E3	-0.088512	0.92524	-1.25528	-1.1886	1.60216	-0.0774363	0.98764	0.619286	-0.525892	0.277242	1.16123	-0.656136	-1.19748	-1.3755	1.24565	-0.45362
LINC01934	1.65833	2.55399	-0.463302	-0.50116	-0.473397	-0.47853	-0.50116	-0.50116	-0.451117	-0.416315	-0.254586	-0.50116	-0.432146	-0.50116	1.72179	-0.458913
ITGA4	0.219183	1.65218	-1.19461	-0.639231	0.769725	-0.430577	0.942444	-0.440144	-0.145112	0.112979	1.02608	0.0333413	-1.26349	-1.30242	1.73138	-1.07173
NEUROD1	-0.33756	-0.654665	1.94244	0.366738	-0.689131	-0.393677	-0.514446	-0.79448	-0.302439	-0.191206	-0.376245	-0.79448	1.06961	2.52763	-0.0957264	-0.76237
ITPRID2	-1.00789	-0.976477	2.25056	-1.46635	-0.301119	0.652452	0.188807	0.387358	-0.835617	0.674757	0.926974	-0.588083	0.957993	0.641066	-0.368574	-1.13585
DNAJC10	-0.380098	-0.0366642	-0.897186	-1.27051	-0.530962	0.526334	0.110056	-0.0481214	1.9618	0.649402	0.310158	2.12163	-1.21101	-1.22483	-0.149097	0.0690998
NUP35	0.196791	0.642201	-1.00123	-1.31076	1.95929	0.0997816	0.123682	-0.489633	0.333297	-0.188074	1.85194	0.420021	-1.14821	-1.31076	0.588908	-0.76724
AC096667.1	-0.728225	-0.733692	0.375958	-0.742148	-0.705136	1.47125	-0.422265	1.54288	-0.698435	2.17685	-0.64505	-0.742148	0.719593	0.549051	-0.709939	-0.708543
ZNF804A	-0.848864	-0.866982	-0.742534	-0.21927	0.657177	-0.244282	1.57652	0.149103	1.24243	0.11219	2.43027	-0.366338	-0.866982	-0.866982	-0.866982	-0.278473
ZC3H15	0.126106	0.0237085	-0.723735	-0.188222	0.469951	0.978953	0.474696	0.111677	-0.078182	0.317098	1.96239	0.45107	-1.81647	-1.62258	0.939048	-1.4255
ITGAV	-0.275036	0.844261	-0.526723	-1.35569	-0.701845	0.600501	0.877465	0.985149	-0.785457	2.39131	0.685766	-1.06166	-0.958501	-0.424993	0.31488	-0.609428
CALCRL	-0.525711	-0.550264	-0.505826	-0.550264	-0.517852	0.823425	0.866758	2.15176	-0.550264	2.38427	-0.425148	-0.550264	-0.550264	-0.550264	-0.417196	-0.532886
TFPI	-0.564936	-0.57451	-0.560154	0.45367	0.210811	-0.482642	2.99265	-0.335678	-0.546156	1.33002	0.904538	-0.57451	-0.558994	-0.57451	-0.545693	-0.573907
WDR75	0.865604	0.851303	-1.13803	-1.01848	1.60999	0.444136	0.613539	-0.302942	0.0274914	-0.0623149	1.45488	0.364122	-1.48045	-1.54511	0.317417	-1.00116
SLC40A1	-0.765103	-0.881324	1.22507	1.61127	0.284028	-0.573103	-0.107935	-0.720636	-0.889467	-0.424979	1.03011	-0.882408	1.17657	1.68587	-0.886932	-0.881018
ASNSD1	0.176524	0.702399	0.260728	-0.181509	0.568149	0.89507	-0.0452812	-1.3604	-0.234812	-0.190266	2.54191	0.417197	-1.08551	-1.30396	0.168032	-1.32827
ANKAR	0.148968	1.18647	-0.876925	-1.06261	-0.351517	-0.665994	0.426282	-0.271331	0.241495	-0.338739	0.068262	2.27995	-1.02789	-0.910234	1.78581	-0.631998
ORMDL1	0.171041	1.20869	-0.902829	-1.37742	-0.673591	0.512856	0.167382	0.0825005	0.600578	0.708605	0.15839	1.56933	-1.48852	-1.26643	1.43422	-0.904799
PMS1	0.133008	0.994685	-1.30082	-1.50536	1.19374	0.60887	0.758822	-0.466939	0.0757123	-0.0600645	1.06597	0.864776	-1.41492	-1.25478	1.13547	-0.828158
C2orf88	-0.508263	-0.547378	-0.542849	1.83353	0.878237	-0.535988	0.259332	-0.529959	-0.513997	-0.464326	2.78497	-0.558252	-0.529801	-0.558252	-0.488405	0.0213981
HIBCH	0.189413	0.268116	-0.706103	-1.49728	0.0753713	-0.215859	0.812517	-0.7222	0.871841	-0.139504	1.04416	1.89276	-1.32097	-1.37863	1.27294	-0.446568
INPP1	-0.620453	-0.336377	3.02166	-1.00724	-0.485401	0.340555	0.181595	-0.440162	-0.643545	-0.0277666	0.230357	-1.12097	-0.119801	0.656077	1.06331	-0.691834
MFSD6	0.968419	1.74744	-1.35038	-0.256003	-0.481908	0.302398	0.0149621	-0.190019	-0.540354	0.704831	0.460955	0.112434	-1.40534	-1.40534	1.86876	-0.550855
NEMP2	0.964086	0.66925	-1.09579	-1.24818	-0.312301	0.581775	0.512178	-0.807654	0.210941	-0.0552032	0.930458	-0.324951	-1.24818	-0.720191	2.47665	-0.532884
NAB1	-0.415063	0.108669	0.586004	-1.37337	0.484092	1.25219	1.25144	-0.0548423	-1.12215	0.555949	1.62415	-1.514	0.212699	-0.791868	0.525724	-1.32963
GLS	1.02095	1.62473	0.111049	-1.49506	-0.912875	-0.581963	-0.183514	-1.31011	0.831528	-0.274836	0.0732735	0.986249	-0.489319	-0.681781	1.84035	-0.558666
STAT1	1.58089	1.14354	1.02193	-2.05233	-0.66352	0.70576	-0.766937	-0.342824	0.0164598	0.65261	-0.0148886	-0.864037	-0.133784	0.684772	0.556536	-1.52419
STAT4	1.28802	2.29539	-0.451807	-0.511651	-0.483171	-0.468938	-0.317987	-0.471112	-0.432624	-0.39798	-0.449047	-0.511651	-0.447463	-0.475842	2.31597	-0.480108
MYO1B	1.60242	-0.438772	0.69113	-0.698966	-0.769272	-0.287066	-0.38474	-0.733176	-0.663985	-0.4008	-0.75959	0.694026	0.991959	2.5184	-0.694145	-0.66742
NABP1	-0.381997	-0.349654	0.977197	-0.541551	-0.57652	-0.348362	-0.498781	-0.401237	-0.460604	-0.227895	-0.511336	-0.516009	2.59719	2.15487	-0.356254	-0.559055
CAVIN2	-0.464705	-0.462602	-0.452916	-0.475371	0.88548	-0.427015	1.75892	-0.419577	-0.443792	-0.084515	2.93214	-0.475371	-0.453762	-0.475371	-0.475371	-0.466171
SLC39A10	0.290997	0.521254	-0.999613	-0.927875	-0.450066	-0.00667937	0.519817	-0.433172	0.53638	-0.168383	0.312535	2.94484	-1.03008	-0.868004	0.651495	-0.893442
STK17B	-0.0334137	-0.121469	1.03369	-0.429449	-0.97743	-0.612123	-0.801281	-0.446539	-0.0656005	-0.134538	-0.895422	0.123121	2.22377	2.22642	-0.209847	-0.87989
AC114760.2	0.626794	0.194696	-0.121491	-0.331489	-1.16833	-1.01703	-0.631412	-1.1868	0.652643	-0.167408	-0.770386	1.2555	1.22371	2.25166	0.19395	-1.00461
HECW2	-0.443625	-0.431503	0.316241	-0.529755	-0.50098	-0.392139	-0.470758	-0.384738	-0.365111	0.244398	-0.523701	-0.529755	2.41174	2.53979	-0.419511	-0.520592
GTF3C3	0.067531	0.250282	-0.0481347	-1.59588	0.894147	0.908101	1.03387	-0.466409	0.348954	0.727043	1.08513	0.169995	-1.71626	-1.50275	1.01772	-1.17334
ANKRD44	0.216138	0.538027	0.142109	-1.05928	-1.06007	-0.632572	-0.794024	-0.579828	0.976217	-0.450627	-0.973058	2.59647	0.824351	0.514134	0.648581	-0.906557
ANKRD44-IT1	-0.247887	-0.165311	0.0775589	-0.894736	-0.879852	-0.597808	-0.801737	-0.568599	1.14435	-0.337773	-0.675588	1.31446	0.598513	2.74502	0.000636448	-0.711244
SF3B1	0.400664	1.14684	1.41622	0.102291	-0.922414	-0.355075	-0.735978	-1.26321	-0.111866	-0.185103	-0.245115	-0.00721735	0.878076	1.32984	0.808855	-2.25681
COQ10B	0.615611	1.39938	1.10164	-0.0256817	-1.11245	-0.916197	-0.828477	-0.582906	-0.485772	-0.396963	-0.863634	-0.792551	1.11833	1.07481	1.7493	-1.05445
HSPD1	-0.0150982	-0.393243	-0.804685	-0.863975	2.27041	0.695679	0.644987	-0.464345	-0.0108148	-0.31436	2.20028	-0.348021	-0.930008	-0.994424	-0.195334	-0.477046
HSPE1	0.756687	0.483221	-1.31131	-1.19004	1.73609	0.307592	0.270746	-0.446049	0.563737	-0.516066	1.59247	0.506979	-1.36137	-1.35784	0.531463	-0.566312
MOB4	1.12805	1.6341	-0.421789	-1.02033	-0.131336	-0.48489	-0.209609	-0.436307	0.422844	-0.665666	-0.0691653	-0.41442	-0.160589	-0.347845	2.55236	-1.37542
PLCL1	0.428735	0.20237	1.27803	-0.722476	-0.719333	-0.180958	-0.481325	-0.567176	-0.722476	-0.275238	-0.705697	-0.485479	1.46798	2.69707	-0.5099	-0.704126
FTCDNL1	-0.338256	-0.361742	-0.687097	-0.769178	0.911443	0.532145	2.40735	0.56059	-0.769178	0.394599	1.74657	-0.769178	-0.769178	-0.769178	-0.769178	-0.550539
C2orf69	-0.113604	-0.153933	1.36888	-1.27697	0.0835283	-0.216145	-0.151006	-0.851289	0.0818727	-0.812722	-0.213763	0.0664296	1.63909	2.29694	-0.398614	-1.34869
TYW5	-0.57789	-0.197787	1.92946	-0.876636	-0.600516	-0.549566	-0.334041	-0.701389	-0.287923	-0.34787	-0.28259	-0.198416	1.89847	1.94529	0.232152	-1.05075
MAIP1	-0.457741	-0.0880491	-0.347607	-1.16162	1.48897	1.4406	0.65954	0.205247	-0.506664	0.160566	1.75559	-1.86764	0.0246789	-0.712945	0.412644	-1.00558
SPATS2L	0.278317	0.334437	-0.805003	-0.834448	-0.784651	2.6753	0.804371	1.25398	0.0741607	0.844369	-0.506532	-0.736379	-0.78908	-0.924688	-0.232133	-0.652016
KCTD18	0.228967	0.575405	-0.0805588	-1.73944	-0.436242	-0.258263	0.605457	0.38687	0.574375	-0.129218	-0.154175	2.51408	-0.281873	-1.36021	0.800001	-1.24518
SGO2	-0.502702	-0.688545	-0.0893366	-0.592593	0.807718	2.9125	-0.0143575	-0.549797	-0.262895	-0.380317	1.56277	-0.605382	-0.785968	-0.50058	0.363128	-0.673648
BZW1	0.360833	1.41105	0.209113	-2.00487	-0.417496	0.874781	-0.395831	-0.504818	-0.335165	0.0438922	0.503473	-0.225812	-0.0159636	0.297097	1.96228	-1.76256
CLK1	-0.146943	-0.0246162	1.92105	-0.280086	-1.09523	-0.505165	-0.681623	-0.718392	-0.162209	-0.324605	-0.602613	-0.112956	1.71547	1.87321	0.423368	-1.27865
PPIL3	0.603048	0.825902	-0.970044	-1.65292	1.26896	0.11668	1.06065	-0.363269	0.210896	-0.138269	1.2581	0.138729	-1.37143	-1.24708	1.19415	-0.934109
NIF3L1	0.332929	1.33756	-1.08876	-1.46227	1.60599	0.334548	-0.330752	-0.00880113	0.592188	-0.52103	0.427171	0.93377	-1.58856	-1.29128	1.01324	-0.285945
ORC2	0.699999	0.908841	1.26345	-0.774778	0.949757	-0.462992	0.00658847	-1.57894	0.416322	-0.949857	1.19929	-0.675471	-0.293719	0.703212	0.58462	-1.99632
FAM126B	-0.447575	-0.359576	0.732817	-0.56135	-0.503692	-0.292925	-0.49754	-0.457814	-0.473658	-0.323251	-0.40219	-0.369877	2.78348	2.05488	-0.308292	-0.57344
NDUFB3	-0.595405	-0.540909	-0.557851	-1.75355	0.943446	1.41028	-0.274192	1.34697	-0.688073	1.05121	0.441169	-1.4626	0.908607	0.771797	-0.0739367	-0.926958
CFLAR	-0.460717	-0.195241	1.20758	-0.781646	-0.718339	-0.446731	-0.618635	-0.465142	-0.391565	-0.293122	-0.62111	-0.433444	2.35645	2.17424	0.178259	-0.490835
CASP10	-0.640027	-0.593948	2.78488	-0.597401	-0.724401	-0.545821	-0.212384	-0.213202	-0.541093	0.15069	-0.0575831	-1.0378	-0.391868	0.092601	1.74335	0.784011
CASP8	0.593717	2.15654	-0.263119	-0.901477	-0.676769	-0.686444	-0.282778	-0.520016	-0.0711045	-0.388225	-0.508158	-0.27046	-0.040349	0.0237964	2.60008	-0.765232
ALS2CR12	-0.124993	-0.336249	-0.295534	3.73132	-0.100516	-0.302749	-0.24648	-0.31887	-0.131648	-0.299728	-0.263471	-0.0202004	-0.276343	-0.353153	-0.319146	-0.342237
TRAK2	-0.240301	-0.236943	-0.296637	3.74001	-0.0513286	-0.270359	-0.275701	-0.284067	-0.224944	-0.258302	-0.243079	-0.144359	-0.320197	-0.34573	-0.208854	-0.339212
STRADB	-0.36234	-0.336131	-0.440638	3.59934	0.559002	-0.359633	-0.122349	-0.407673	-0.21494	-0.35099	-0.0573851	0.213248	-0.481586	-0.495411	-0.293397	-0.44912
AC007256.1	-0.223923	-0.195039	-0.272444	3.74384	-0.144573	-0.259274	-0.234846	-0.3191	-0.192563	-0.23742	-0.199774	-0.3191	-0.3191	-0.3191	-0.188481	-0.3191
TMEM237	-0.462969	0.14887	-0.885856	-0.948253	1.97057	1.1789	1.09617	-0.704628	-0.147382	-0.39203	1.91279	-0.698492	-0.564076	-0.948253	0.177759	-0.733127
ALS2	-0.280962	-0.286933	-0.426788	-0.491981	0.225532	-0.129572	3.41995	-0.333153	-0.384304	0.603342	0.746192	-0.620649	-0.538493	-0.570402	-0.330402	-0.601373
SUMO1	-0.254788	0.964397	-0.231839	-2.18607	0.998654	0.143931	0.187377	0.792943	0.021994	0.193614	0.798427	0.540897	-1.13423	-0.230787	1.27888	-1.8834
NOP58	0.395462	0.387327	-1.0987	-1.19449	2.04897	0.612563	0.278559	-0.543949	-0.022339	-0.415511	1.97229	0.357183	-1.17173	-1.18191	-0.0353396	-0.388393
BMPR2	-0.593426	0.132097	-0.66702	0.358129	-1.03151	0.0945649	0.154358	-0.130376	1.01445	2.73429	-0.763201	0.0859494	-0.415803	-0.832796	1.14915	-1.28886
FAM117B	0.336017	-0.233597	-0.710751	-1.00639	-0.5878	0.170082	-0.339196	0.647247	1.03398	1.10788	-0.119431	2.75146	-0.81841	-0.916247	-0.382505	-0.932325
ICA1L	-0.083716	0.621504	-0.81684	-1.01136	-0.487256	0.14399	0.437279	-0.953027	1.35868	-0.321715	0.39797	2.55424	-0.934829	-0.731272	0.780129	-0.95378
WDR12	-0.536016	-0.501872	-0.607556	-0.602566	2.04389	1.03364	0.448851	-0.435092	-0.00991417	0.0203383	2.14687	0.468939	-1.00732	-1.16941	-0.497086	-0.795701
CARF	0.564535	1.10453	-0.409346	-1.39951	-0.436694	-0.25285	0.914141	-0.422039	0.355643	-0.266247	0.209649	1.86	-1.39951	-0.923963	1.55995	-1.0583
NBEAL1	-0.0786379	0.0872345	-0.931706	-0.868537	-0.0539392	0.543262	1.23893	-0.900115	0.0634552	1.09856	1.37367	1.85511	-1.27331	-1.33745	0.0596348	-0.876165
CYP20A1	0.862454	1.00865	-0.717522	-1.1408	-0.493185	-0.236185	-0.291774	-0.0876158	0.729422	0.202967	0.140087	2.44268	-1.15622	-1.45167	0.804691	-0.61597
ABI2	0.598267	0.596578	-1.18426	-0.565692	0.738848	-0.621001	1.82381	-0.670358	-0.064929	-0.111998	1.56174	-0.0829089	-1.21792	-1.28861	1.27637	-0.787946
CD28	3.45638	1.22026	-0.31878	-0.346215	-0.34024	-0.339719	-0.313518	-0.313014	-0.335972	-0.327992	-0.344001	-0.346215	-0.346215	-0.346215	-0.340198	-0.318344
CTLA4	3.20014	1.72763	-0.339397	-0.374081	-0.374081	-0.359033	-0.359983	-0.374081	-0.374081	-0.345471	-0.374081	-0.374081	-0.374081	-0.374081	-0.163642	-0.367587
ICOS	2.97779	2.06808	-0.343151	-0.381479	-0.381479	-0.367834	-0.381479	-0.381479	-0.381479	-0.342839	-0.381479	-0.381479	-0.381479	-0.381479	-0.180933	-0.377799
INO80D	-0.290015	-0.0882407	2.15282	-0.528188	-0.637237	-0.454087	-0.675057	-1.16784	-0.142545	-0.351967	-0.24215	1.04853	1.34685	1.2634	0.404752	-1.63903
AC007383.2	0.0643909	1.84579	-0.755284	-1.2388	1.27798	-0.569803	1.79187	0.313192	-0.38359	-0.683574	-0.139135	-0.803388	-1.10258	-0.285648	1.17603	-0.50745
NDUFS1	-0.232861	-0.0243455	0.340157	-0.951054	1.01363	1.78017	-0.096155	-0.627013	-0.886868	0.627298	2.26576	-0.800851	-0.834	-0.632082	0.174282	-1.11607
EEF1B2	0.782721	-0.328122	-1.12693	-1.11592	1.60442	0.0240736	1.3203	-0.179212	0.734305	-0.502712	1.62893	0.720504	-1.15477	-1.15195	-0.651441	-0.604193
DYTN	-0.319857	-0.262252	-0.313464	-0.319857	-0.0186442	-0.315677	3.73251	-0.319857	-0.319857	-0.188552	-0.130813	-0.319857	-0.178307	-0.101074	-0.319857	-0.30459
FASTKD2	0.732214	0.592043	-1.25177	-1.41635	1.35695	0.159506	0.945178	-0.370517	0.863191	-0.0906948	1.58362	-0.252893	-1.61157	-0.862423	0.484827	-0.86132
KLF7	-0.561942	-0.73134	2.47259	-0.747233	-0.780291	-0.159953	-0.222352	-0.30381	-0.363598	0.00850444	-0.626236	-0.0628991	1.67246	1.61613	-0.479221	-0.730807
CREB1	-0.0325704	-0.333069	1.15894	0.392612	-0.709326	0.0999903	-0.566892	-1.23012	0.289179	-0.291347	-0.313331	1.82866	0.575189	1.21435	0.273964	-2.35623
METTL21A	-0.229237	-0.531607	-0.2193	-1.43831	1.81815	0.176623	0.968993	0.193976	1.67715	-0.00410351	0.984216	0.406109	-0.94413	-1.47695	-0.329564	-1.05202
LINC01857	-0.355898	-0.357287	-0.35203	-0.357287	-0.353523	-0.356415	-0.357287	-0.325989	3.18907	-0.346847	-0.355011	1.75569	-0.357287	-0.357287	-0.357287	-0.355329
CCNYL1	-0.286235	0.0156174	0.978298	-1.90658	-0.740024	0.491258	-0.565287	0.331569	0.996711	0.568185	-0.593121	2.37967	-0.0940426	-1.17933	0.18768	-0.584362
FZD5	-0.390994	-0.384708	-0.309917	3.62585	0.537176	-0.137544	-0.389591	-0.180796	-0.346542	0.08254	-0.0684301	-0.42201	-0.42201	-0.42201	-0.360407	-0.410606
PLEKHM3	-0.271534	-0.217263	0.610336	-1.17264	-0.740879	0.410269	-0.364927	-0.532387	-0.469537	0.120138	0.0154395	-0.9204	1.3758	2.76181	0.476471	-1.0807
CRYGD	-0.366293	-0.344926	-0.354751	-0.370025	0.13009	-0.118325	3.57024	-0.370025	-0.370025	-0.350963	0.791992	-0.370025	-0.370025	-0.370025	-0.370025	-0.366888
IDH1	-0.832325	-0.575996	-0.277147	-0.959417	-0.00171556	2.21777	0.720144	1.07391	-0.366813	1.97371	0.225547	-0.367772	-0.56792	-0.942257	-0.447334	-0.872391
PIKFYVE	-0.693338	-0.264061	2.77779	-0.499363	-0.847547	0.228913	-0.0870184	-0.696293	0.764618	-0.0637303	0.0408944	-0.121767	0.30078	1.20021	-0.311618	-1.72848
PTH2R	-0.394517	-0.394517	-0.22515	-0.394517	3.47033	-0.335649	-0.253635	-0.394517	-0.260607	-0.0361902	1.13916	-0.394517	-0.394517	-0.394517	-0.342124	-0.394517
RPE	-0.401513	0.630642	0.27987	-1.04201	0.111275	0.724064	0.1714	-0.152912	-0.590869	0.213377	0.501905	-0.195576	-1.11962	-1.14123	2.9323	-0.921094
KANSL1L	-0.920592	-0.119977	1.82096	-1.44976	-0.860196	-0.1965	0.892504	-0.763139	-0.673516	0.453656	0.291314	-0.372692	0.7645	0.968073	1.5222	-1.35684
AC007038.1	-0.25232	0.509158	0.145493	-0.375634	-0.417473	-0.211017	-0.24078	-0.380912	-0.369214	-0.352536	0.017295	0.0429604	-0.571328	-0.571328	3.58675	-0.559113
LANCL1	0.488113	1.30442	-1.0044	-1.20958	0.930515	0.279386	1.38615	-0.780513	-0.0665986	-0.283053	1.373	0.408281	-1.32136	-1.32136	0.76544	-0.948452
IKZF2	0.449674	2.353	-0.619755	-0.676539	-0.602882	-0.592646	0.915452	-0.676539	-0.546047	-0.279677	0.60346	-0.368486	-0.676539	-0.676539	2.04712	-0.653057
SPAG16	-0.000433867	0.733665	-1.05793	-0.806409	1.21	-0.582883	2.04148	-0.798576	0.290376	-0.767313	1.50825	0.583018	-0.979271	-1.10296	0.404387	-0.675405
BARD1	-0.831838	-0.693523	1.89724	-1.16812	0.658863	2.16589	0.63603	-0.845438	-0.192652	-0.418214	0.607094	-0.26202	-0.547621	-0.518789	0.557094	-1.044
ATIC	0.265505	-0.0081747	-1.09128	-1.12254	2.27659	0.261029	0.824283	-0.49398	0.333155	-0.558076	1.65744	0.562713	-1.10339	-1.12254	-0.107417	-0.573317
MREG	-0.1556	0.355243	1.25995	-0.875165	-0.18439	-0.628082	0.207431	-0.711441	-0.243162	-0.602732	-0.275262	-0.875165	0.585498	3.0704	-0.299252	-0.628269
PECR	-0.388907	-0.307917	2.23752	-0.650609	-0.408255	-0.469665	-0.559538	-0.577149	-0.434253	-0.399635	-0.454467	-0.523957	1.90236	1.84892	-0.19247	-0.621971
XRCC5	-0.24027	-0.0687212	1.88444	-1.95046	0.888348	0.73828	-0.0854874	-0.566317	-0.587545	0.142857	1.53881	-0.717324	0.0557537	0.203494	0.347372	-1.58323
SMARCAL1	0.299223	1.05617	-0.96885	-1.64564	0.741124	0.388573	0.997818	-0.297665	0.790003	0.00428286	1.44861	0.0531	-1.40149	-1.26517	0.913227	-1.11331
RPL37A	0.457381	-0.35451	-1.05078	-1.11384	1.02365	0.760204	0.781048	-0.149138	0.610703	-0.00251486	2.41073	0.338418	-1.19162	-1.15953	-0.488216	-0.871994
IGFBP2	-0.553758	-0.518274	-0.50536	-0.599953	-0.430361	3.03657	0.273739	0.0735946	-0.569675	1.5999	-0.148172	-0.599953	-0.360708	-0.599953	0.481365	-0.578998
TNS1	-0.287655	-0.288193	-0.288363	3.74028	-0.00869113	-0.259315	-0.188485	-0.242155	-0.291175	-0.226467	-0.214643	-0.291175	-0.286307	-0.291175	-0.286783	-0.289701
CXCR2	-0.397073	-0.357884	0.0731754	-0.400465	-0.400218	-0.378379	-0.399948	-0.387447	-0.400465	-0.374657	-0.397019	-0.400465	3.32355	1.44515	-0.147772	-0.400089
CXCR1	-0.434614	-0.413646	0.542382	-0.439325	-0.438669	-0.427765	-0.435856	-0.42238	-0.439325	-0.415296	-0.438501	-0.439325	2.85023	2.06553	-0.274459	-0.438983
ARPC2	-0.435508	0.215305	1.68656	-1.56946	-1.19304	0.619574	-0.614007	0.837345	-0.461103	0.581714	-0.723379	-0.820091	0.893634	1.39295	0.79499	-1.20548
GPBAR1	-0.39398	-0.371796	-0.356005	-0.406234	-0.400641	0.174598	-0.406234	3.04316	-0.406234	1.91743	-0.400247	-0.406234	-0.406234	-0.406234	-0.406234	-0.368883
AAMP	0.343526	1.0128	-1.32217	-1.30564	1.41998	0.275888	0.851501	0.268522	0.970276	0.222741	0.303314	-0.529878	-1.53032	-1.55761	1.06809	-0.491026
PNKD	-0.138117	0.770267	-1.37647	-1.55897	0.978787	0.624798	1.26338	0.776528	0.426777	0.341797	0.695586	-0.268295	-1.55011	-1.34837	1.00995	-0.64753
TMBIM1	-0.0417488	0.744365	-0.630473	0.571724	1.08505	-1.193	-0.461655	-0.26305	-0.311931	-0.27662	-0.217092	-0.423791	0.135368	0.33959	2.69175	-1.74849
SLC11A1	-0.562147	-0.558269	0.0670632	-0.574515	-0.526668	-0.41715	-0.560234	0.851277	-0.548688	0.507739	-0.547767	-0.563904	2.67144	1.89525	-0.563117	-0.570314
CTDSP1	-0.180612	1.16447	1.44596	-1.62829	-0.426536	-0.227269	-0.46509	0.0652575	-0.93001	0.0700976	-0.568495	-0.301277	0.782444	1.51064	1.29153	-1.60282
USP37	0.666112	0.482492	-0.596442	-1.44681	1.37879	1.29225	0.175393	-0.755609	0.0311291	-0.226639	1.46132	0.0563737	-1.2505	-1.44681	1.04808	-0.869122
CNOT9	0.24336	0.734263	-0.761477	-1.48103	1.14221	1.16833	0.402247	-1.06943	0.823035	-0.042628	1.71131	0.00752475	-1.21969	-1.23939	0.474073	-0.892697
BCS1L	0.262002	0.567467	-1.05901	-1.30689	2.14856	0.424791	0.841179	-0.414514	0.917138	-0.245446	1.05851	-0.0867428	-1.30689	-1.30689	0.271431	-0.764693
TTLL4	-0.994211	-0.650896	-0.803106	-1.15032	0.787452	1.32358	-0.459903	0.115573	0.119335	1.70841	0.102449	-1.21377	1.71356	0.508717	0.078423	-1.18531
CNPPD1	0.327173	1.05053	-1.20115	0.492462	-0.475963	-0.786631	0.296736	0.141749	1.46723	-0.430139	-1.41038	0.840675	-1.13014	0.0728076	1.88197	-1.13692
RETREG2	0.753013	1.14023	0.41794	2.49877	-0.305001	-0.638996	0.814551	-0.72676	-0.150263	-0.591205	-0.339754	-1.22544	-0.639057	-0.0131021	0.534187	-1.52911
ZFAND2B	0.569056	1.20768	0.0557336	-1.64668	-0.653542	-0.744726	1.15708	-0.76738	0.560117	-0.273008	-0.40618	0.696166	-0.249054	-0.160181	2.09572	-1.44081
ABCB6	-0.291241	-0.239971	-0.269547	3.74305	-0.0995703	-0.285899	-0.279411	-0.276285	-0.30007	-0.262531	-0.215174	-0.30007	-0.284381	-0.109111	-0.266486	-0.263305
ATG9A	0.662357	0.857647	0.0331073	2.5711	0.88628	-1.18385	-0.479541	-0.374428	-0.40199	-1.01522	-1.16676	-0.54088	-0.0163067	0.18109	0.936475	-0.949085
ANKZF1	1.20669	1.96165	0.657739	-1.1502	-0.705323	-1.12291	-0.594371	-0.288014	1.0094	-0.773169	-0.690643	0.415014	0.782585	-0.044479	0.817987	-1.48195
STK16	0.132783	1.2395	1.59806	-1.13589	0.472612	-1.05039	0.13649	0.0607601	-0.751321	-1.26533	-0.815076	-0.631499	1.12645	1.01002	1.10414	-1.23132
TUBA4A	0.345323	0.879209	1.2929	-0.841114	-0.829633	-0.298256	-0.845302	-0.754592	-0.389919	-0.761834	-0.923737	-0.362092	2.00501	1.84431	0.301646	-0.661916
DNAJB2	0.42069	0.638418	-0.195882	3.32168	-0.721497	-0.710532	-0.341125	-0.0520435	0.072264	-0.416054	-0.973155	-0.130728	-0.462241	-0.120085	0.457304	-0.787011
DNPEP	0.567766	1.14394	-1.43843	-1.26482	1.09463	-0.0408617	0.900192	0.456912	0.0434732	-0.323949	0.228335	0.404224	-1.41905	-1.50752	1.62765	-0.47249
DES	-0.339114	-0.339114	-0.339114	-0.339114	3.53168	-0.317603	-0.250374	-0.339114	-0.277211	-0.322705	1.01897	-0.339114	-0.339114	-0.339114	-0.339114	-0.330734
GMPPA	-0.392773	0.21629	-0.377741	-0.600676	-0.0694323	1.72031	-0.311449	1.40028	-0.957034	0.523391	-0.361674	-0.373534	-1.08269	-1.45173	-0.0107082	2.12916
CHPF	-0.107509	0.00678333	-0.355126	-0.377052	-0.262912	-0.336552	-0.141318	-0.377052	-0.354238	-0.325048	-0.245653	-0.377052	-0.377052	-0.377052	0.325586	3.68125
OBSL1	-0.497629	-0.536642	-0.489282	-0.536642	0.604776	0.103938	3.23027	-0.50274	-0.467318	0.374782	1.14634	-0.536642	-0.415058	-0.536642	-0.536642	-0.404859
STK11IP	-0.635803	0.889872	0.426295	-1.66873	-0.253507	1.45966	0.835395	1.63951	-0.504025	0.579341	-0.418418	-0.00905991	0.135292	-1.66873	0.42205	-1.22915
FARSB	-0.288123	-0.0605827	-0.589127	-1.01976	2.99532	0.619799	0.476948	-0.456975	-0.219189	-0.248843	1.23722	-0.0143907	-1.04178	-0.857549	-0.0112174	-0.521757
ACSL3	-0.581137	-0.328327	1.303	-1.19674	-0.303429	0.0521976	-0.709738	-0.395411	-0.40406	0.0796234	-0.143008	-0.460683	1.82829	2.43455	-0.195613	-0.979506
AP1S3	-0.532093	-0.326279	-0.281364	-0.733905	-0.510374	0.634987	-0.493956	-0.458039	3.05288	-0.0410441	-0.153787	1.54543	-0.68203	-0.733905	0.076441	-0.362967
WDFY1	-0.487042	0.334933	1.26851	-1.56669	-0.75613	1.94638	-0.140174	0.0847464	0.29377	1.33848	-0.0442127	-0.574647	-1.09983	-0.380973	1.03417	-1.25129
MRPL44	0.202485	0.792533	-0.61714	-2.17312	1.32756	0.708245	0.690279	0.247711	0.379554	0.238807	0.751619	0.472669	-1.42558	-0.809144	0.711295	-1.49778
SERPINE2	-0.402016	-0.415732	-0.477298	-0.487254	1.85538	-0.388061	0.537042	-0.455346	-0.432335	-0.361768	2.97755	-0.487254	-0.487254	-0.487254	-0.0246696	-0.463738
FAM124B	-0.485551	-0.489621	-0.488176	-0.506649	2.08781	-0.269369	1.19705	-0.410322	-0.506649	-0.268341	2.55002	-0.506649	-0.450202	-0.506649	-0.448625	-0.498076
CUL3	-0.264682	0.57372	1.91776	-1.18255	-0.745164	0.403394	-0.768315	-0.740872	-0.220804	-0.00929662	0.021368	-0.495244	1.67297	0.782356	0.853535	-1.79817
DOCK10	1.16021	1.66536	-0.900335	-0.943593	-0.85297	0.470421	-0.377023	-0.180262	0.925631	0.0959843	-0.583398	0.393186	-1.0041	-1.02671	1.98641	-0.828799
RHBDD1	-0.360433	-0.554047	-0.511014	2.0228	-0.058468	-0.529215	-0.645391	-0.633547	0.826874	-0.328372	-0.334156	2.53505	-0.839615	-0.604984	-0.58777	0.602287
COL4A4	-0.365314	-0.356776	-0.391317	-0.408269	-0.395421	-0.293155	-0.397301	-0.408269	3.55807	-0.319709	-0.355005	0.395005	-0.408269	-0.408269	-0.124034	0.678035
COL4A3	-0.325808	-0.325808	-0.301163	-0.325808	-0.325808	-0.323796	-0.306081	-0.325808	3.70977	-0.259272	-0.279736	0.0457781	-0.268243	-0.325808	-0.243364	0.180958
MFF	0.342703	0.452133	-0.129233	-2.57827	0.627661	0.609201	0.817785	1.07032	-0.0394289	-0.0535316	0.417811	-0.185015	-0.798565	-1.1097	1.54248	-0.986352
AGFG1	-0.514502	-0.514508	1.42744	-0.587186	-0.551056	-0.274949	-0.58525	-0.240464	-0.516507	0.0610908	-0.532125	-0.490897	2.07893	2.35731	-0.48491	-0.632416
TRIP12	-0.650583	-0.384485	2.16564	-0.185937	-0.743757	0.255611	-0.758771	-0.164993	-0.67232	0.17745	-0.240798	-0.745016	1.25516	2.09066	-0.217797	-1.18008
SP110	0.0419616	0.326731	-0.106926	-1.29853	-1.05728	-0.771045	-0.445423	-0.243595	1.85858	-0.375678	-0.841825	1.60137	1.44058	0.973234	0.0511941	-1.15335
SP140	0.683536	0.89952	-0.620678	-0.698927	-0.688629	-0.61201	-0.689914	-0.562953	2.2371	-0.541822	-0.690505	2.15493	-0.666789	-0.434383	0.370168	-0.138638
SP140L	0.699122	0.48496	-0.64684	-0.823611	-0.386343	-0.60794	-0.232226	-0.35905	1.10135	-0.271257	-0.329196	2.9671	-0.836662	-0.783814	0.706598	-0.682188
SP100	0.0424354	0.398725	0.288713	-1.0055	-1.10831	-0.592765	-0.613364	-0.796817	1.27691	-0.462405	-0.922166	2.10819	1.07085	0.843719	0.740069	-1.26828
CAB39	-0.356284	-0.307596	1.09802	-0.568479	-0.509856	-0.430426	-0.638134	-0.315503	-0.4452	-0.214974	-0.436338	-0.555272	2.46901	2.21492	-0.345867	-0.658027
ITM2C	-0.179235	-0.301935	-0.509001	-0.525367	-0.383119	-0.171661	1.36852	-0.505715	0.352549	-0.428819	-0.337116	-0.129836	-0.529642	-0.534687	-0.472543	3.28761
PSMD1	-0.498844	-0.384568	-0.16355	-0.177463	1.89291	1.54724	-0.0339704	0.450258	-0.387311	0.733318	1.56125	-1.1915	-1.04623	-1.35412	-0.00356889	-0.943853
AC017104.1	-0.396665	-0.123446	-0.422084	-0.367706	-0.4215	-0.399455	-0.427987	-0.427987	0.651377	-0.415901	-0.427987	1.10505	-0.427987	-0.427987	3.35581	-0.425545
NCL	0.00415819	0.0667308	-1.00833	-0.962771	1.96039	0.576351	0.472431	-0.54572	-0.0207936	-0.365451	2.24481	0.19075	-1.16025	-1.13368	0.322267	-0.640889
NMUR1	-0.283973	0.632209	-0.310094	-0.317531	-0.311735	-0.314672	-0.285109	-0.238769	-0.317531	-0.310272	-0.317531	-0.317531	-0.317531	-0.317531	3.64513	-0.317531
PTMA	-0.0358885	-0.148067	-1.18959	-1.25907	1.20104	1.72623	0.577516	0.510021	0.135674	0.0558598	1.64855	0.214831	-1.29773	-1.2914	0.0575085	-0.905477
PDE6D	0.249868	1.65145	-0.902633	-1.68101	0.152267	0.100283	0.747725	0.169422	1.09013	-0.0558223	0.113234	0.871714	-1.09945	-1.68101	1.11478	-0.840927
COPS7B	0.372629	1.07728	-1.14383	-1.02843	0.912216	-0.0828772	0.529636	0.406887	0.559362	-0.316332	0.993207	0.656396	-1.63931	-1.70978	1.32971	-0.916758
DIS3L2	1.11582	1.19576	-1.03259	-1.7226	0.702386	-0.0560477	-0.37968	-0.0208039	0.517876	0.266233	0.910932	0.154715	-1.86811	-0.217994	1.40576	-0.971655
EIF4E2	-0.234617	0.360364	-0.693196	-1.31316	1.07619	0.63339	-0.291132	2.14533	-0.566672	1.3462	0.495793	-1.14382	-0.811081	-0.300452	0.565152	-1.2683
GIGYF2	-0.780289	-0.611313	1.74811	0.268819	0.18067	0.219474	-0.452701	-0.839533	-1.01055	0.761994	1.92046	-0.624925	-0.224662	0.808241	0.454874	-1.81867
INPP5D	-0.649191	0.0182246	0.918535	-1.333	-0.857269	-0.686352	-0.360368	-0.484509	0.881979	-0.319585	-0.491356	0.630579	1.49679	1.70201	1.11248	-1.57896
ATG16L1	0.627796	2.65001	0.0565175	-0.664474	-0.332527	-0.346143	-0.591796	-0.794738	0.305299	-0.413493	-0.41599	0.9278	-0.508	-1.07694	1.52207	-0.945388
DGKD	-0.554133	-0.114055	1.51848	-0.888784	-0.947722	-0.371853	-0.820354	-0.499278	-0.240832	-0.407639	-0.773744	0.821747	1.10701	2.36429	0.707599	-0.900738
USP40	-0.451417	-0.306602	-1.2274	-1.2412	-0.621193	1.23005	0.330206	1.18758	0.347114	1.69781	1.3335	0.421932	-1.2412	-1.2412	-0.402787	0.184818
HJURP	-0.586976	-0.683977	-0.31853	-0.415724	1.91904	2.47608	-0.259406	-0.701839	-0.620595	-0.453582	0.886023	-0.479931	-0.645723	-0.701839	0.946074	-0.359095
ARL4C	0.99414	1.38201	-0.45971	-0.464049	-0.473879	-0.426303	-0.409771	-0.436339	-0.324904	-0.431746	-0.470136	-0.219857	-0.470341	-0.464521	3.1172	-0.441795
AGAP1	-0.213592	0.936336	-0.563615	1.01452	0.780619	-0.551503	-0.564491	-0.60659	-0.493536	-0.50934	0.157764	-0.60659	-0.60659	-0.60659	3.02473	-0.591524
COPS8	0.502378	1.44087	-1.10053	-1.1926	1.17826	0.0642274	0.181339	-0.414514	0.105349	-0.523908	0.754088	0.623784	-1.65529	-1.25227	1.65902	-0.370201
COL6A3	0.314754	0.76868	-1.02802	-0.951371	-0.359177	-0.330032	-0.2746	3.09516	0.0274874	0.00306786	-1.02059	0.456366	-0.681351	-0.705182	0.278745	0.40606
LRRFIP1	-0.331091	-0.373283	1.89661	-1.36302	-1.06611	0.823738	0.125643	0.0881073	-0.601116	0.551997	-0.668254	-0.538977	1.01027	1.80521	-0.0277769	-1.33195
RAMP1	-0.48299	-0.283052	-0.513925	-0.530431	0.37134	-0.504399	1.87369	-0.530431	-0.530431	-0.421453	0.925747	-0.530431	-0.530431	-0.530431	2.74249	-0.524858
UBE2F	-1.18221	-0.363651	0.905068	0.938457	-0.274789	-0.127695	-0.480196	0.493416	-1.22166	-0.11556	0.471587	-1.21651	0.483214	1.08946	2.08872	-1.48766
SCLY	0.757384	0.899143	-1.08399	-1.22939	2.05343	0.022264	0.470873	-0.599956	0.37384	-0.00941527	0.249753	-0.329248	-1.22939	-1.22939	1.53942	-0.655323
ILKAP	0.359891	1.0948	-0.866462	-0.542824	1.31555	0.275794	-0.055065	-0.263689	0.151636	-0.391394	0.475149	0.105401	-1.55759	-1.01676	2.25432	-1.33876
LINC02610	-0.487509	-0.753266	-0.313304	-0.949465	2.22359	-0.332561	0.40535	-0.0615036	-0.0480312	-0.663031	2.44782	-0.0329823	-0.839143	-0.0385573	0.302846	-0.860255
HES6	-0.372676	-0.222145	-0.562483	0.278665	3.38157	-0.29448	-0.455505	-0.347103	-0.606437	-0.362145	0.763962	-0.0646806	-0.6153	-0.673747	0.640662	-0.488158
PER2	-0.15908	0.947915	-0.609541	-1.44645	0.0275031	0.690783	0.123739	-0.691547	1.22847	-0.334661	1.54943	1.74684	-1.35709	-0.114361	-0.337471	-1.26449
TRAF3IP1	0.64637	-0.0025484	-0.937858	-0.95994	1.40512	0.0179476	0.564869	-0.842865	-0.213318	0.349313	1.35418	-0.578485	-1.13999	-1.28827	2.06985	-0.444378
ASB1	0.541489	0.932176	0.109659	-1.38781	-0.211271	0.0248904	-0.781909	0.695153	0.777316	-0.431253	-0.806939	0.68888	-0.585864	-0.647344	2.47732	-1.39449
TWIST2	-0.311222	-0.287286	3.71346	-0.317521	-0.317521	-0.306009	-0.317521	-0.317521	-0.176758	-0.155748	-0.304892	-0.317521	-0.176499	0.227597	-0.317521	-0.317521
HDAC4	-0.143395	0.0999551	1.66026	-0.944524	-0.764686	0.350437	-0.703821	-0.223507	-0.748153	0.188263	-0.678904	-0.777931	2.55692	0.436391	0.749467	-1.05677
NDUFA10	-0.134435	-0.0454972	-0.894243	-1.15979	1.43863	1.03988	0.821959	0.278518	0.136546	0.373268	0.88529	0.450999	-1.70208	-1.46794	1.15855	-1.17966
COPS9	0.508897	0.953962	-0.600519	-1.77199	-0.192099	1.6162	-0.058227	1.62374	-0.257947	0.865891	0.10791	-0.68886	-1.36412	-0.990126	0.78214	-0.534867
DUSP28	0.0781497	1.46026	0.210351	-1.38431	-0.455652	-0.1314	-0.183208	0.326924	0.595352	-0.189895	0.244419	0.301033	-0.861433	-1.8365	2.36433	-0.538421
RNPEPL1	0.293367	1.82423	0.263356	-1.29002	-0.786576	0.121131	-0.663974	1.13578	-0.392415	0.563143	-0.690054	-0.625981	-0.392388	-0.567413	2.17615	-0.968332
MTERF4	1.22025	2.08661	-0.781365	-1.19194	-0.348634	-0.530811	0.0462002	-0.155505	0.543317	-0.450214	-0.190301	1.65316	-1.27653	-0.945561	0.814085	-0.492763
PASK	3.23432	1.01927	-0.663443	-0.775521	0.174035	0.324132	-0.326159	-0.674348	0.279405	-0.453974	0.155382	-0.355263	-0.749348	-0.775521	-0.00712317	-0.405837
PPP1R7	0.289961	1.51177	-0.881743	-1.50494	0.601112	0.519692	-0.108653	0.970481	-0.475597	0.695829	0.2339	-0.0840754	-1.23011	-1.64781	1.6474	-0.537217
HDLBP	-0.725117	-0.696395	-0.027552	-0.59395	0.493792	1.07909	-0.0791192	0.401074	-0.899334	0.442798	0.431667	-1.04437	-0.643571	-0.608932	-0.488867	2.95879
2002-09-01	-0.402865	0.147204	0.972283	-2.12768	0.672055	0.785193	0.554792	-0.0164066	-1.13601	0.822674	1.47881	0.380277	-1.09661	-0.479272	0.743231	-1.29768
FARP2	-0.410439	-0.384281	-0.439445	-0.751583	0.439138	-0.330334	-0.0773519	-0.544888	1.26469	0.108094	0.234724	3.14301	-0.918046	-0.918046	-0.254971	-0.160267
STK25	0.171549	0.756194	-0.80159	-1.29911	2.65106	-0.188009	0.454357	0.0707462	-0.149321	-0.183458	0.351364	0.233618	-1.15116	-0.952246	1.09666	-1.06065
THAP4	0.486253	0.542604	-1.12577	-1.35967	1.75086	-0.252417	1.39237	1.06746	0.36117	-0.413775	0.723155	-0.466013	-1.38399	-1.24088	0.527384	-0.608735
ATG4B	-0.379483	1.44116	0.822129	-1.53327	0.155039	0.701943	0.0187312	1.16577	-0.27273	0.0828625	-0.171313	-1.03229	-1.07678	0.29674	1.53824	-1.75676
DTYMK	-0.343359	-0.305527	-0.759205	-0.860589	2.40003	1.88976	0.0280403	-0.0598812	-0.221521	-0.446722	1.3068	-0.408566	-0.894673	-0.962988	0.150535	-0.512142
ING5	0.642946	0.6876	0.0113239	-1.77511	1.42274	0.0437709	0.934478	-0.705218	0.966132	-0.247041	1.31902	0.370824	-1.4753	-1.43987	-0.0966019	-0.65969
D2HGDH	0.0453479	1.02111	2.59953	-1.74747	-0.420473	0.402274	-0.0115393	0.0560425	-0.638037	-0.356808	0.0930281	-0.740107	-0.189178	1.16162	-0.131228	-1.14411
LINC01881	0.418925	0.0824936	-0.623434	-1.17844	-0.4172	-0.300049	-0.370692	-0.329618	2.18051	-0.0178443	-0.412632	2.36278	-0.621519	-0.93215	0.693599	-0.534737
IL5RA	-0.299352	0.828719	-0.482883	-0.500986	-0.494116	-0.41603	0.278728	-0.500986	-0.433064	-0.174238	0.661035	-0.500986	-0.500986	-0.500986	-0.34964	3.38577
TRNT1	0.208786	0.892567	-0.713488	-1.98645	0.835129	0.133125	0.612213	-1.0975	0.300148	-0.134474	1.76987	1.06777	-1.30742	-1.01656	0.527633	-0.0913593
CRBN	0.994975	1.60239	-0.475451	-1.20681	-0.452672	-0.656198	0.80349	-0.327485	-0.517701	-0.0283332	1.22781	-0.528591	-0.735022	-0.0338476	1.8577	-1.52426
SUMF1	0.0360056	-0.0439336	-0.0291	-1.41059	0.181349	1.23713	0.269546	1.6842	-1.0995	1.7882	-0.66893	-0.277014	0.34087	-0.765512	0.410246	-1.65297
LRRN1	-0.607382	-0.621426	1.00302	-0.669083	-0.661729	-0.669083	-0.192344	-0.669083	0.363876	-0.567078	-0.669083	-0.476739	1.9029	2.36991	-0.639858	0.803179
SETMAR	-0.00852759	-0.412304	-0.856089	-0.918538	1.36094	0.477776	1.27998	-0.65457	-0.371422	-0.139472	2.59081	-0.159948	-0.830058	-0.918538	0.31908	-0.759125
ITPR1	-0.239747	-0.176118	-0.912038	-0.979515	-0.563769	-0.0729786	0.546971	-0.501352	1.60219	0.271189	0.453652	2.79424	-0.619089	-0.618759	-0.0793541	-0.905523
BHLHE40	0.0827742	0.753298	-0.473764	-0.609856	-0.493547	0.00693785	-0.0207979	-0.318615	0.0393613	-0.0650143	-0.399306	-0.362829	-0.52217	-0.609856	3.50444	-0.511055
ARL8B	-0.40856	-0.122268	1.48841	-1.84018	-0.455101	1.69471	-0.265533	1.18526	-0.176705	1.0711	-0.34261	0.179301	0.0511876	-0.669239	0.284343	-1.67411
AC026202.2	-0.378318	-0.409259	-0.225121	-0.409259	-0.345877	0.03405	-0.31259	0.278054	-0.291619	-0.194762	-0.372781	-0.409259	-0.409259	0.198544	-0.409259	3.65671
EDEM1	0.0458108	-0.234851	1.93409	-1.05072	-1.32946	1.48106	-0.922214	-0.954591	0.445186	0.0962751	-0.74332	0.455625	-0.81207	0.874477	-0.572203	1.28691
RAD18	-0.339918	0.189279	-0.735223	-1.20194	1.59628	1.48134	0.0540927	-0.344395	0.242472	0.00654808	2.25718	-0.283261	-1.22964	-0.560319	-0.18009	-0.952396
THUMPD3-AS1	-0.198063	0.412837	1.03897	-1.60762	-0.691402	-0.446258	0.599424	-0.6157	1.37597	-0.74418	-0.020316	1.34294	-0.695125	-0.356554	1.83003	-1.22495
THUMPD3	0.332646	1.0321	-0.619574	-1.50664	0.925632	0.854992	0.400649	-0.145688	-0.348113	0.251852	1.80733	0.319848	-1.57419	-1.646	0.530459	-0.615302
SETD5	0.304491	0.849401	0.988902	-1.71584	-0.225727	-0.201213	0.280012	-1.92823	0.53576	-0.349943	0.70802	0.580874	0.107453	0.0598495	1.60192	-1.59573
MTMR14	-0.450239	0.244521	0.288612	-1.59086	-0.70555	0.991988	-0.180602	2.06674	0.64702	1.40315	-0.776254	0.100086	-0.516066	-0.246346	0.409774	-1.68597
BRPF1	0.431029	0.877697	-0.360962	-1.51201	0.012521	0.281121	0.265572	-0.395041	-0.962282	-0.0487888	0.21393	0.29126	-0.579432	-0.264688	2.91532	-1.16524
OGG1	0.107769	0.464504	-0.436062	-1.42181	1.44837	-0.262354	0.0539635	-0.0671307	0.0871856	0.180405	1.66609	0.400007	-1.35469	-1.50466	1.56579	-0.927372
CAMK1	-0.422773	-0.38973	-0.471523	-0.517734	-0.0660109	-0.267523	-0.471908	3.2854	-0.437287	1.28152	0.532112	-0.444489	-0.503643	-0.517734	-0.0977706	-0.490911
TADA3	0.103182	1.75887	0.31264	-1.68029	0.325625	-0.324015	-0.01046	0.3272	-0.301448	-0.225737	0.478389	-0.729507	-0.246058	-0.734181	2.30411	-1.35832
ARPC4	-0.696156	-0.426002	2.19739	-1.10091	-0.908485	0.765331	-0.777003	0.137552	-0.448315	0.605487	-0.387023	-0.323294	1.00081	1.7373	-0.203422	-1.17326
TTLL3	-0.430502	-0.280853	2.62652	-0.909743	-0.733019	-0.45709	-0.262035	-0.457753	-0.548225	-0.0533064	-0.552446	0.0813641	1.39176	1.62734	-0.173348	-0.868668
RPUSD3	-0.0650375	0.228432	-0.884244	-1.35228	1.71572	0.138203	0.662555	-0.149384	-0.317602	-0.221411	1.55962	0.686249	-1.30781	-1.35228	1.35418	-0.694906
JAGN1	0.389763	0.344518	-1.15978	-1.12972	0.899886	0.15392	1.718	0.308629	0.646144	-0.0284138	1.27113	-0.589756	-1.3343	-1.64482	0.898408	-0.743603
CRELD1	1.31718	1.88653	-1.13212	-0.399454	-0.151861	-0.506108	1.09565	-0.0230661	0.423352	-0.310717	-0.274331	-0.822053	-1.29903	-1.29903	1.5429	-0.0478388
EMC3	-0.332621	0.0244277	-0.419893	3.70784	-0.102373	-0.255092	-0.277821	-0.0128796	-0.308335	-0.0887479	-0.315208	-0.407643	-0.365218	-0.379167	-0.065261	-0.402004
EMC3-AS1	-0.235176	-0.252932	-0.924839	-0.312221	1.3148	1.38788	0.085248	-0.798947	0.877252	-0.339702	1.84511	1.09695	-1.26647	-1.26647	-0.293631	-0.916837
CIDECP1	-0.360749	0.663677	-0.206505	3.1295	0.0405609	0.0967476	-0.262859	0.383686	-0.328575	0.109032	-0.694789	-0.251366	-0.181843	-1.52271	0.454617	-1.06842
FANCD2	-0.665416	-0.341766	-0.32596	-0.354301	1.86203	1.63826	-0.396113	-1.024	0.000290144	-0.545115	1.10426	1.70295	-1.07352	-0.585593	-0.0267811	-0.969229
BRK1	-0.166202	0.504031	-0.271002	-2.25645	0.147292	0.688329	0.496176	1.79329	0.374662	0.687591	0.143744	0.0707028	-0.915022	-0.314628	0.838777	-1.8213
VHL	0.130632	1.10198	1.01482	-2.04757	-0.0997264	0.156024	0.127752	0.455848	0.082381	0.184119	0.159144	0.759296	-1.373	-0.894091	1.69144	-1.44905
TATDN2	0.276352	0.854806	2.59486	-1.20251	-0.820983	0.52783	-0.447074	0.557844	-0.681284	0.278964	-0.410281	0.569539	-0.503815	-1.25237	0.7331	-1.07498
SEC13	-0.0318495	0.0827508	-0.8928	-1.38059	1.05133	1.08125	0.266544	1.32719	-0.412302	0.144037	0.0473799	-0.920548	-1.26474	-1.29349	0.244052	1.95179
ATG7	-0.494904	-0.356211	2.29156	-1.23356	-0.712828	0.361733	-0.676723	0.0512694	-0.488877	0.325567	-0.791086	-0.0320933	1.48498	1.575	-0.29971	-1.00411
VGLL4	-0.266737	1.5025	0.141386	-1.53307	0.263256	0.418401	1.14394	-0.36567	0.155774	0.213804	1.51078	-1.39193	-0.708449	-0.860414	1.12459	-1.34817
TAMM41	0.800484	1.22073	-1.15215	-1.12966	0.642156	-0.291829	0.14219	-0.00737157	0.191875	-0.174407	0.450655	1.8739	-1.3914	-1.3914	1.12558	-0.909356
PPARG	-0.374584	-0.378703	-0.305661	-0.450983	-0.440535	0.249746	-0.358009	1.77437	-0.450983	3.11745	-0.427261	-0.450983	-0.303407	-0.450983	-0.340444	-0.409027
TSEN2	0.439857	-0.200563	-1.01771	-1.22147	1.81501	0.493521	0.645599	-0.367412	-0.181525	-0.104506	1.62409	1.28242	-1.22147	-1.22147	0.140673	-0.905043
MKRN2	0.601856	1.24483	-0.822881	-1.24321	0.928472	0.0302842	0.857714	-0.0684559	0.260436	-0.207599	1.29323	-0.500919	-1.12575	-1.48737	1.48342	-1.24406
RAF1	-0.49623	-0.335822	1.10457	-0.693554	-0.43232	-0.31768	-0.540524	-0.218521	-0.467204	-0.169205	-0.431468	-0.520693	1.90972	2.68279	-0.231163	-0.842695
RPL32	1.29876	0.112474	-1.24067	-1.25186	0.771097	0.145777	1.3592	0.242805	1.01944	-0.201853	0.731387	1.15897	-1.31152	-1.31668	-0.525301	-0.99202
IQSEC1	-0.641234	-0.191063	1.11771	-0.194877	-0.532695	-0.95364	-1.03024	-0.537329	0.151476	-0.285054	-1.00124	0.698362	2.08899	1.94143	0.31538	-0.945977
NUP210	0.583842	0.840217	-1.16109	-1.19067	1.15672	1.6644	0.040431	-0.488254	0.443467	-0.0997185	0.436025	-0.222297	-1.33275	-1.39317	1.46019	-0.737345
CHCHD4	-0.192612	-0.0162738	-1.05483	-1.07411	2.12274	0.0442458	0.346664	0.701806	-0.354535	0.196739	2.03876	0.243857	-1.20613	-1.25914	-0.195479	-0.34171
TMEM43	-0.154467	0.272128	0.570845	-1.28597	-0.545982	-0.453755	0.220093	-0.467173	-0.541713	-0.216834	0.104596	-0.854323	2.48346	1.70398	0.491094	-1.32598
XPC	1.02237	1.23482	-0.890352	-1.59565	-0.319377	-0.46021	0.0766219	-0.567731	0.17504	-0.0569194	0.29619	1.17607	0.121981	-0.97409	2.06748	-1.30624
LSM3	-0.511413	0.09989	-0.931012	-1.45049	1.72335	1.56316	0.246843	0.550417	-0.27864	-0.127925	1.41176	0.537495	-1.30164	-1.18631	0.298022	-0.643508
SLC6A6	-0.484123	-0.367532	1.0692	-0.591573	-0.629487	-0.417986	-0.512985	-0.173257	-0.50756	0.00507494	-0.538158	-0.520859	2.39198	2.28001	-0.374961	-0.627781
CCDC174	0.975179	1.58493	-0.81884	-0.893364	-0.302589	-0.459197	0.305717	0.945549	0.403275	-0.392564	-0.169991	0.559426	-0.89289	-1.33398	1.89139	-1.40206
[truncated: 9,236 more rows]

## Sheet: Lung
Supplementary File 11B. The preferential expression of genes in cell types of lung.
Gene symbol	cd8-positive, alpha-beta t cell	cd4-positive, alpha-beta t cell	adventitial cell	alveolar fibroblast	b cell	basal cell	basophil	bronchial smooth muscle cell	bronchial vessel endothelial cell	capillary aerocyte	capillary endothelial cell	classical monocyte	club cell	dendritic cell	endothelial cell of artery	endothelial cell of lymphatic vessel	fibroblast	intermediate monocyte	lung ciliated cell	lung microvascular endothelial cell	macrophage	mesothelial cell	myofibroblast cell	neutrophil	nk cell	non-classical monocyte	pericyte cell	plasma cell	plasmacytoid dendritic cell	pulmonary ionocyte	respiratory goblet cell	respiratory mucous cell	serous cell of epithelium of bronchus	smooth muscle cell	type i pneumocyte	type ii pneumocyte	vascular associated smooth muscle cell	vein endothelial cell
AL627309.6	-0.217928	-0.217928	-0.217928	-0.217928	-0.217928	-0.196638	-0.217928	-0.217928	-0.217928	-0.217928	-0.194568	0.309309	-0.217928	-0.164729	-0.217928	-0.217928	-0.217928	0.0158689	-0.0487277	-0.217928	-0.123741	-0.217928	-0.217928	5.94956	-0.217928	-0.0969327	-0.217928	-0.217928	-0.217928	-0.217928	-0.189591	0.363677	-0.217928	-0.217928	-0.138706	-0.0365898	-0.217928	-0.217928
AL732372.2	-0.356585	-0.117896	0.483244	0.784646	-0.480761	-0.271301	-0.307669	-0.480761	-0.480761	-0.129113	-0.206977	-0.23846	-0.0278379	-0.39372	-0.480761	-0.480761	-0.480761	-0.292493	-0.325553	-0.450173	-0.414898	-0.480761	4.74032	2.42231	1.02979	-0.391323	-0.216747	-0.480761	-0.480761	0.595734	-0.219824	1.30739	-0.480761	-0.480761	-0.480761	-0.334305	-0.480761	-0.418654
MTND1P23	0.47588	0.0702838	-1.11021	-0.153358	-0.865497	1.79423	-0.663401	0.183704	-1.40911	0.194078	0.0429248	1.30759	1.75739	-1.07102	-0.435329	-0.272145	0.110257	1.798	0.477909	1.03913	-0.618516	-0.749139	0.750278	-1.40402	0.469289	1.5325	0.255587	-0.825154	-1.42264	2.08223	0.743438	-1.30728	-0.15522	-1.45474	-0.623361	-0.35849	-0.40464	0.218558
MTND2P28	0.274531	0.218041	-1.18202	-0.755726	1.09407	-0.417255	2.07695	-0.505114	-0.600805	-0.299748	-0.178274	0.441753	-0.148419	1.04298	-0.378804	-1.64399	-1.64399	0.704423	1.08798	-0.757208	2.80864	0.0879861	-1.64399	1.56058	0.330919	0.374312	-0.79365	-1.13895	0.417026	1.0061	-0.142155	1.1999	-0.947071	-0.399483	0.0293439	-0.366158	-0.415758	-0.396995
MTCO1P12	-0.0484264	-0.0864072	-0.629606	-0.255988	-0.356732	0.393867	-0.443321	-0.353363	-0.801039	-0.385115	-0.321493	3.0702	0.616738	-0.627521	-0.409041	-0.61522	1.42604	3.64969	-0.106022	0.303659	-0.263875	-0.114199	-0.844382	-0.731207	-0.0294678	1.81521	-0.426724	-0.707712	-0.844382	0.916998	0.0669306	-0.765156	0.103355	-0.844382	-0.50354	-0.400905	-0.485251	0.03779
MTATP6P1	0.199875	-0.000811616	-0.314359	-0.0447923	1.269	0.977942	0.874292	0.638855	-1.55307	-0.739734	-0.725929	-0.788674	-0.242041	-0.408155	-0.95231	-0.064174	-0.751809	-0.413076	2.39289	-0.234275	0.37883	-0.140553	0.603628	-1.46476	0.0114081	0.0397426	-0.529194	-1.54857	-0.949809	3.26993	0.794533	1.25293	0.780039	-0.547505	-0.450904	-0.757799	0.576551	-0.438157
AL669831.4	-0.143784	0.466134	-0.151259	0.01607	-0.28815	-0.181399	-0.120635	-0.28815	-0.28815	0.14064	-0.202885	-0.137229	-0.277498	-0.167138	-0.28815	-0.28815	5.91405	0.0840381	0.0352681	-0.156103	-0.205465	-0.28815	-0.28815	0.181156	-0.28815	-0.0562362	-0.28815	-0.28815	-0.28815	-0.28815	-0.161746	-0.28815	-0.28815	-0.28815	0.0728233	-0.205422	-0.28815	-0.132977
LINC01128	-0.271059	-0.0273036	0.261477	0.0921891	-0.47816	-0.371458	-0.304331	-0.46337	-0.0512243	0.443146	-0.0236384	-0.363418	-0.473079	5.06837	0.182274	2.22116	-0.689959	-0.529388	-0.417929	-0.307768	-0.273686	0.419517	0.645628	-0.689959	-0.208735	-0.225069	0.193872	-0.274617	-0.689959	0.80616	-0.393354	-0.689959	-0.473989	-0.269773	-0.38635	-0.268625	-0.524082	-0.19355
SAMD11	-0.360981	-0.428806	5.05619	1.2514	-0.428806	-0.394831	-0.34759	-0.428806	-0.428806	-0.351218	-0.428806	-0.40822	-0.0152408	-0.428806	0.826806	-0.428806	1.37054	-0.428806	-0.363885	0.135924	-0.417246	0.194703	-0.428806	-0.428806	-0.229679	-0.428806	-0.303893	-0.310396	-0.428806	-0.428806	-0.417344	-0.428806	-0.428806	1.24117	-0.373809	-0.415815	-0.0383157	1.10382
NOC2L	0.867954	0.220416	1.49873	-0.117701	-0.088514	0.363895	-0.439618	0.186696	0.265257	0.21743	-0.000204407	-0.496874	0.125757	0.0854134	-0.134407	2.7548	-1.92971	-0.372861	0.0702709	-0.151076	-0.483157	0.313705	-0.163281	-1.61766	2.56625	-0.244825	0.75605	-1.56981	-1.23743	-1.07968	-0.457813	-0.199576	-1.63585	1.81434	0.0628989	-0.159507	0.21148	0.198209
AL645608.7	-0.511582	-0.63232	-0.63232	0.39773	-0.63232	0.223758	-0.558345	2.34571	-0.63232	-0.540739	-0.419062	-0.486424	-0.212554	-0.561562	0.325771	-0.133909	-0.63232	-0.63232	-0.196917	-0.63232	-0.615773	-0.63232	0.890542	-0.63232	-0.231595	-0.23506	1.76506	-0.595364	-0.63232	-0.63232	1.74057	1.98667	-0.63232	0.762187	0.000203318	-0.5488	3.44653	-0.449215
HES4	-0.563105	-0.572561	-0.390887	-0.240516	-0.570616	0.283652	-0.511613	2.00621	-0.365347	-0.504119	-0.393141	-0.544364	-0.0709099	-0.549686	-0.0314052	0.254601	-0.254613	-0.461978	0.059599	-0.546353	-0.588215	-0.583152	0.156649	-0.547473	-0.439383	-0.28694	3.97592	-0.584568	-0.603604	-0.484247	0.731734	0.643451	-0.582387	1.82653	-0.195427	-0.518817	2.53983	-0.492747
ISG15	0.462846	-0.265682	-0.0999537	-0.184161	-0.478992	-0.902366	0.231564	0.47612	0.154927	0.983052	0.852515	-0.651222	-0.90141	2.91437	1.84125	-0.478761	-1.20022	-0.880423	-0.0753827	-0.268564	3.48835	0.682302	-0.313609	-1.05701	0.0460478	-0.389147	-0.0526346	-0.697834	-0.246319	-0.71164	-0.699876	-0.946645	-0.566469	0.0381772	0.338071	-0.922485	0.502866	-0.0216545
AGRN	-0.689216	-0.652896	-0.540806	-0.479033	-0.66798	0.717981	-0.63121	-0.255965	-0.477267	-0.362152	-0.299789	-0.673612	0.714255	-0.516224	0.924075	0.157341	-0.715361	-0.687532	0.581793	0.498252	-0.413797	1.05891	0.541158	-0.59889	-0.533321	-0.57865	0.408529	-0.606995	-0.715361	-0.347376	0.729323	1.15254	-0.577311	-0.715361	4.77226	0.246444	-0.48474	0.717974
AL390719.1	-0.0724799	0.048487	-0.481678	-0.481678	-0.481678	-0.427476	1.22443	-0.481678	-0.481678	-0.274075	-0.481678	-0.408614	-0.306079	3.00101	-0.481678	-0.481678	-0.481678	-0.481678	-0.382225	-0.43927	-0.20423	-0.481678	3.55416	-0.481678	-0.481678	-0.290244	-0.481678	0.0642022	-0.481678	2.04188	-0.269375	-0.481678	1.79419	-0.481678	0.91	-0.412421	-0.481678	-0.481678
RNF223	-0.34249	-0.34249	-0.34249	-0.34249	-0.34249	-0.029051	-0.34249	-0.34249	-0.34249	-0.34249	-0.294981	-0.34249	1.29118	-0.34249	-0.34249	-0.34249	-0.34249	-0.34249	0.455908	-0.31472	-0.34249	-0.34249	-0.34249	0.427429	-0.34249	-0.34249	-0.34249	-0.34249	-0.34249	-0.34249	0.535758	4.99612	-0.34249	-0.34249	2.49439	0.0276868	-0.34249	-0.34249
C1orf159	0.171201	-0.0375882	-0.41701	-0.808601	-1.08322	0.168846	-0.376999	0.424799	-0.456669	0.764926	0.165422	0.445806	0.202289	-0.100928	-0.120258	-1.08322	4.22733	0.448972	0.985559	-0.0767088	-0.516239	-1.08322	-1.08322	-0.836218	0.270594	0.348602	1.39419	-0.551533	-1.08322	-0.139789	-0.229532	-0.0196768	-1.08322	2.02665	-0.413503	-0.0596859	-0.81649	0.431544
AL390719.2	-0.427536	-0.431258	-0.497826	-0.234703	-0.497826	1.8538	-0.374274	-0.497826	-0.497826	-0.418054	-0.387925	-0.446008	0.916678	-0.497826	-0.497826	-0.497826	-0.497826	-0.497826	2.88664	-0.497826	-0.480788	-0.497826	-0.497826	-0.497826	-0.148495	-0.360518	-0.497826	-0.406217	-0.497826	2.3067	3.4363	0.707965	0.772905	-0.497826	0.291097	-0.134378	-0.497826	-0.458889
TTLL10	-0.187203	-0.172986	-0.198911	-0.198911	-0.198911	-0.178101	-0.184678	-0.198911	-0.198911	-0.0137466	0.0355907	-0.192201	-0.161472	-0.198911	-0.0694613	-0.198911	-0.198911	-0.198911	5.9822	-0.144152	-0.193603	-0.198911	-0.198911	-0.198911	-0.0515696	-0.191187	-0.198911	-0.198911	-0.198911	0.201876	-0.157665	-0.198911	-0.198911	-0.198911	-0.19085	-0.185287	-0.198911	-0.166205
TNFRSF18	1.05082	0.663993	-0.311096	-0.311096	-0.311096	0.0784484	0.145172	-0.311096	-0.311096	-0.2974	-0.280646	-0.278355	-0.239592	0.254161	-0.290092	-0.311096	-0.311096	-0.311096	-0.286126	-0.271016	-0.300292	-0.237228	-0.311096	-0.311096	5.55354	-0.272011	-0.259716	1.35227	-0.311096	-0.311096	-0.202434	-0.311096	-0.311096	-0.311096	-0.311096	-0.3006	-0.311096	-0.294252
TNFRSF4	1.03914	1.64868	-0.692961	0.0112461	-0.692961	-0.600674	2.59666	-0.512851	0.195597	2.09076	1.09639	-0.569116	-0.607096	0.0688056	0.767029	1.82291	-0.692961	-0.600834	-0.641934	-0.217332	-0.654329	-0.493037	-0.304764	-0.692961	2.50042	-0.53134	-0.576101	1.22787	-0.692961	-0.392688	-0.604338	-0.692961	-0.692961	-0.692961	-0.673533	-0.665928	-0.524997	-0.350943
SDF4	0.19365	-0.250876	1.88352	0.874433	-1.84235	-0.32314	-0.476676	-0.0773586	0.608134	1.13985	1.00014	-0.573115	-0.655021	-0.264475	1.08971	1.66834	0.598846	-0.83575	-1.09445	-0.496087	-0.153948	-0.0626867	-0.0391411	-2.00707	2.62993	-0.574503	0.487832	-0.808067	-1.17978	0.867211	-0.839882	-1.20834	-0.169009	0.623958	-0.661395	-0.563841	0.965805	0.525602
B3GALT6	-0.0834955	-0.4135	0.20827	-0.122242	-1.01754	-0.592315	0.405817	0.144143	2.87631	-0.57552	-0.139522	-0.554764	-0.544082	0.317332	0.0732667	-0.973803	2.71229	-0.557002	-0.391123	-0.207284	-0.243545	0.386536	1.81926	-0.813189	-0.0319271	0.0054838	0.468749	-0.988409	-0.460137	0.159642	-0.776566	-1.25581	-1.09383	2.74288	-0.352651	-0.40324	0.458883	-0.187378
UBE2J2	1.11771	0.43405	0.398404	-0.23186	-1.09227	-0.0229656	-0.730929	2.15802	0.421856	0.175788	0.436104	0.385497	0.17563	-0.125199	0.929593	-1.34024	-1.00069	0.339432	0.255364	-0.0362877	-0.857748	-0.51647	-0.543479	-1.31854	2.61395	-0.640412	2.12832	-1.50968	0.325328	1.4822	-0.683932	-1.09512	-0.84772	-0.574884	1.01257	-0.481175	-1.07675	-0.0634446
SCNN1D	-0.354936	-0.216334	-0.510185	0.88392	-0.510185	-0.101148	-0.489172	1.26942	-0.510185	-0.510185	-0.353262	-0.413981	0.263503	-0.194627	-0.510185	-0.510185	3.68399	-0.210326	0.563965	0.182576	-0.241978	-0.510185	-0.510185	-0.510185	0.0965281	-0.154393	-0.510185	-0.510185	3.9222	-0.510185	-0.268996	-0.510185	-0.510185	-0.510185	-0.392263	-0.280677	0.339231	0.119536
ACAP3	0.275308	-0.186834	0.696429	0.974498	-1.06218	0.107202	-0.707146	-0.126275	-1.1649	0.101285	-0.0153223	0.864541	-0.482563	0.344158	-0.682521	-1.82579	0.324278	-0.0943011	-0.525361	-0.900375	-0.81133	0.506468	3.49046	-1.11069	0.44402	0.501973	-0.0894208	-0.565809	-0.177759	1.09977	-0.555683	-0.958136	-0.945101	2.49495	1.06965	-0.399733	0.45206	-0.359822
PUSL1	0.0215814	-0.206641	1.49671	-0.694344	0.000475142	-0.191224	-0.468521	0.469364	0.0647652	-0.740983	-0.335457	-0.133434	-0.534823	-0.130763	-0.376579	1.77777	-1.15875	-0.207839	0.0651116	-0.4987	-0.37838	2.38364	3.66302	-0.954258	-1.05845	-0.379579	0.0865234	-0.553463	2.06336	-0.0391102	-0.367712	-0.176852	-0.978907	-0.290848	-0.27062	-0.0193127	-0.240176	-0.706593
INTS11	-0.179097	-0.319532	0.134706	0.759947	0.00941478	0.0720857	-0.02154	0.551891	0.824188	-0.461947	-0.198581	-0.0841459	-0.222717	0.265426	0.464214	0.217272	-1.02023	-0.857862	1.58237	-0.110613	-0.54501	1.27174	0.550668	-1.55502	-0.411158	-0.546736	0.965935	-1.39247	2.74389	-2.07769	-0.267368	-1.43667	-1.96383	1.49996	1.37715	-0.282298	0.538089	0.125583
CPTP	-0.113143	-0.16509	0.522916	-0.273901	0.203187	-0.0422576	-0.533392	0.696562	-0.133817	2.88277	0.687935	-0.903904	-0.542592	-0.596374	1.28598	0.862175	-0.323595	-1.08788	-0.181217	2.29142	-0.714658	0.869349	1.36802	-1.32347	-0.862882	-0.718139	-0.378029	-0.659384	-0.509971	0.957837	-0.483851	-0.37918	0.396196	-1.69803	1.31912	-0.564659	-1.69803	0.543974
TAS1R3	-0.0489558	-0.154898	-0.23462	-0.23462	-0.23462	-0.227819	-0.23462	-0.23462	-0.23462	-0.0928432	-0.23462	-0.23462	-0.127778	-0.23462	0.324536	-0.23462	5.82269	-0.23462	-0.23462	-0.23462	-0.189529	-0.23462	-0.23462	-0.23462	-0.23462	-0.129983	-0.23462	1.16717	-0.23462	-0.23462	-0.0437633	-0.23462	-0.23462	-0.23462	-0.23462	-0.198694	-0.23462	-0.23462
DVL1	-0.63994	-0.788005	-0.782443	-0.440369	-0.234323	-0.166234	-0.732681	-0.206121	0.826068	-0.448345	0.236437	-0.839179	-0.126039	-0.606929	-0.244453	3.43318	2.10568	-0.696263	0.00913775	-0.305191	-0.86614	0.0474578	0.672219	-0.806192	-0.548554	-1.02573	-0.325908	-0.991128	2.76564	0.27443	-0.328209	-0.331053	0.655232	-0.821892	1.37255	0.138861	0.579615	0.184813
MXRA8	-0.404041	-0.400962	3.92296	2.28385	-0.410004	-0.402234	-0.405932	0.648408	-0.410004	-0.410004	-0.401785	-0.406004	-0.38334	-0.410004	-0.37886	-0.410004	0.83573	-0.410004	-0.407756	-0.403286	-0.408575	-0.277326	-0.0758066	-0.410004	-0.410004	-0.410004	0.770287	-0.410004	-0.410004	-0.410004	-0.407628	-0.410004	-0.410004	-0.162182	0.246027	-0.395345	3.14919	-0.395321
AURKAIP1	-0.0827359	-0.959167	0.629109	-1.12124	-1.11908	0.240957	-0.234141	0.717472	1.11618	0.0685589	-0.532196	-0.136256	-0.293432	-0.212643	-0.744122	-0.684093	0.268862	-0.0955917	1.23319	-0.592429	-0.465285	1.40163	-1.46406	-1.16478	-0.648067	-0.422308	-0.743968	-0.895014	-0.0684998	3.31319	-0.0724924	-0.312804	1.31478	2.37455	0.907835	0.56529	-0.369416	-0.717775
CCNL2	0.386087	0.365558	0.0556162	0.0681428	0.0256118	0.0415209	-0.484954	0.537663	-0.649665	1.05666	1.13265	-0.550146	0.594205	-0.940879	0.163361	4.13742	0.297171	-0.374993	0.0229725	0.154702	-0.987522	-1.21972	0.664789	-0.989944	0.278585	-0.440655	0.525564	-1.27773	0.519618	0.384866	-0.702876	-1.55096	-1.05432	-1.27917	1.05407	-0.437717	-0.424599	0.899004
MRPL20-AS1	0.668068	0.482839	-1.33856	-0.776866	0.563412	-0.184905	-0.269801	0.112424	1.03163	0.10232	0.877273	-0.4706	-0.37265	-0.0375767	0.085222	1.46471	0.93826	-0.0306807	1.04665	-0.304552	-0.859042	0.336923	0.247179	-1.1544	0.719347	-0.690869	-0.363935	-0.290172	4.10547	-0.541095	-0.579558	-1.30565	-0.338341	-1.30636	-0.484174	-0.629515	-1.19083	0.738406
MRPL20	0.0402872	-0.403551	0.303364	-0.620925	-0.632549	0.383676	-0.385735	0.345149	1.66395	-0.0712922	-0.10222	-0.0757284	0.0101833	-0.279123	0.0361465	-0.15533	2.13351	-0.276187	0.625427	-0.342114	-0.680254	-0.381475	0.3683	-1.84886	-0.429674	-0.333487	0.155474	-1.31601	-1.5684	2.26191	-0.0429735	-0.703553	-0.389545	3.48995	-0.306383	0.500877	-0.290986	-0.681849
ANKRD65	-0.610048	-0.490188	0.0976231	0.352954	-0.666199	1.698	-0.635279	-0.666199	-0.562916	-0.482461	-0.471743	-0.619801	0.719317	-0.173211	-0.497498	-0.552198	-0.666199	-0.612489	3.82904	0.0549544	-0.630403	-0.509691	-0.666199	-0.666199	-0.666199	-0.616301	-0.20054	-0.5964	-0.068898	2.14574	0.984421	1.94801	-0.2953	-0.666199	1.11799	0.61842	-0.129686	-0.14803
VWA1	-0.681398	-0.683212	-0.251129	-0.217162	-0.686701	-0.123216	-0.738299	0.547357	4.29905	-0.409082	-0.50678	-0.719306	-0.254517	-0.691192	0.119734	-0.442747	-0.756787	-0.72088	-0.243847	1.76232	-0.748108	-0.756787	0.428826	-0.535278	-0.626778	-0.723276	-0.232094	-0.729212	-0.756787	0.596082	-0.060541	1.15335	-0.168404	0.254268	1.2996	0.909516	0.931345	1.16207
ATAD3C	-0.447827	-0.134023	0.0859004	-0.799245	-0.799245	1.00502	-0.593869	-0.799245	0.611358	-0.799245	-0.650659	-0.65742	0.902976	-0.710672	-0.6766	0.429961	0.782379	-0.462671	-0.196863	-0.31326	-0.705496	-0.137126	-0.799245	0.49075	-0.297023	-0.686491	-0.700733	0.777834	-0.799245	3.21417	0.307413	0.177754	0.600621	-0.799245	1.19316	3.38406	-0.799245	-0.198661
ATAD3B	-0.942338	-0.0739054	0.678756	-1.47536	1.73754	-0.447261	-0.441996	-1.24631	2.5504	0.235004	-0.599037	-0.175612	-0.0301243	0.87225	-0.226814	0.856236	1.51829	-0.422193	0.0435533	-0.391323	-0.591396	0.362269	-1.76707	-1.39724	-1.02822	-0.109005	-0.530667	-1.14611	1.05733	1.20972	-0.824726	0.224472	-1.03671	1.81991	0.175749	0.882591	0.791133	-0.111795
ATAD3A	-0.271148	-0.26078	0.218889	-0.519649	-0.917259	-0.278895	-0.509247	-0.237208	1.00193	-0.522073	-0.537241	-0.369148	-0.187031	-0.301717	-0.277049	-0.27382	-0.0848307	-0.172732	1.03957	-0.371235	-0.286936	0.212477	-0.999785	-0.795814	-0.686008	-0.280416	-0.0650764	-0.565142	1.2774	1.49671	-0.27004	-0.434601	-0.432269	4.84408	0.607727	0.963501	-0.563904	-0.191238
SSU72	0.890869	0.51755	-0.397328	-0.854884	-0.171389	0.701281	0.0766757	-0.958119	-0.169237	-0.0734154	0.117746	0.612301	0.234098	0.468662	-0.0255318	0.667867	-2.50496	1.23438	0.939846	-0.583854	0.22925	-0.509152	0.408662	0.303747	0.54652	0.863232	-0.0193906	-2.21878	-1.49608	3.19994	0.0133715	-1.8021	-0.436809	0.512297	-0.204897	0.623463	-0.268999	-0.466831
AL645728.1	1.31046	0.774091	-0.264308	0.133425	-1.03641	-0.131	-0.153197	0.722441	-0.733119	-0.356646	-0.505874	0.438833	-0.221883	-0.384221	-0.0564184	-1.03641	-1.03641	0.971297	0.386977	-0.256071	-0.322293	-1.03641	0.289667	1.46138	1.16269	0.368583	0.0329594	-0.846234	4.23638	-1.03641	-0.641529	-1.03641	-0.810069	0.951225	-0.591748	-0.534216	-0.178519	-0.0345846
FNDC10	0.0613332	0.106439	-0.21226	-0.131388	-0.612949	-0.151522	-0.0859292	-0.612949	-0.428956	-0.578809	-0.612949	0.720956	0.0036776	0.237294	-0.612949	-0.612949	0.968229	1.17897	-0.321531	-0.425477	0.456402	-0.0569964	-0.612949	-0.612949	-0.23884	0.427924	-0.467709	-0.612949	-0.612949	5.09148	-0.242591	-0.343025	-0.612949	-0.253895	0.909986	1.05157	-0.612949	-0.532903
AL691432.2	-0.528388	-0.159905	-0.565764	1.41866	-0.340233	1.12697	-0.0990267	2.30937	-0.0263042	0.128471	0.460484	0.0859303	1.64749	-0.295405	-0.134292	-1.14087	-1.14087	0.573033	1.85396	-0.711973	-0.584797	-0.118436	-1.14087	-0.610864	-0.620925	0.138391	-0.137783	-1.09258	-1.14087	0.344682	0.705223	-0.749025	-1.14087	-1.14087	-0.302343	0.339748	2.95597	-0.165098
MIB2	1.11388	0.815777	0.416284	-0.4433	-0.113946	0.983139	-0.0695729	-0.51143	-0.336989	-0.335626	-0.470212	-0.518562	0.133276	-1.00793	-0.26625	-0.636426	1.13353	-0.536384	0.791302	-0.719367	-0.660898	0.419878	-0.790024	-1.18099	4.4587	-0.538298	0.127824	-0.824053	1.61732	0.218462	-0.489389	-0.658159	0.813158	-0.618394	0.0645749	-0.480705	-0.35358	-0.546615
MMP23B	-0.131885	0.0228436	4.72659	2.65143	-0.381496	-0.360445	-0.381496	-0.381496	-0.381496	-0.381496	-0.181341	-0.35522	-0.381496	-0.381496	-0.381496	-0.381496	-0.381496	-0.381496	-0.321347	-0.381496	-0.365791	0.369981	-0.381496	-0.381496	0.194786	-0.310471	0.121614	-0.381496	-0.381496	-0.381496	-0.381496	-0.381496	-0.381496	1.8694	-0.000870857	-0.308893	0.391052	-0.381496
CDK11B	1.83906	0.706378	-1.16903	-0.341557	-0.35584	-0.0539664	0.193571	0.323458	0.670712	-0.585405	0.432528	-0.23573	0.287137	-0.295184	-0.29745	-0.562819	0.230776	-0.125235	0.026604	-0.291598	-0.959202	-0.749863	2.02842	-0.115145	3.89807	-0.0731551	-0.0477324	-1.21873	1.68175	-0.623609	-0.678294	-0.495546	-1.47052	0.292363	-0.736299	-0.323225	-0.685138	-0.120551
SLC35E2B	2.36079	1.27605	0.640178	0.148627	-0.993051	0.42007	-0.405994	-0.471699	-0.455509	-0.355439	-0.141646	-0.0324238	0.880746	-0.940018	-0.702028	0.102003	0.851627	0.163117	0.93203	-0.268955	-0.929335	-1.03564	-1.45533	-0.901754	1.09213	0.288332	2.31757	-0.931608	0.543698	1.13536	-0.259062	-1.45533	-1.26726	-1.45533	1.86893	-0.346648	-0.324861	0.107673
CDK11A	1.58072	0.990779	-1.13331	-0.419679	-0.187458	0.0497758	-0.238391	-0.413649	0.694079	0.462064	0.897919	-0.163382	-0.207537	-1.07203	-0.192862	-0.687052	2.70335	-0.0401154	-0.493712	-0.24001	-0.972549	-0.779636	2.0636	1.35502	2.31708	-0.161752	1.16783	-0.922108	-1.27459	-1.27459	-0.7552	-0.844837	-0.371999	-0.0496461	-0.809423	-0.597768	0.0760761	-0.0550192
AL031282.2	0.70207	0.715162	-0.57685	-0.0973111	-0.57685	0.0151733	-0.427432	-0.103545	-0.294919	-0.046346	0.0699993	-0.261978	-0.205276	-0.57685	-0.308298	-0.57685	4.29531	-0.499587	-0.0970199	-0.325694	-0.512901	-0.57685	-0.57685	-0.57685	3.28937	-0.430904	0.536847	-0.136446	-0.57685	-0.57685	0.0647626	1.0565	-0.57685	-0.57685	0.089492	-0.39284	0.0475345	-0.396377
SLC35E2A	0.994483	0.521646	0.0206245	-0.00717068	-0.309744	0.286211	-0.459235	-0.833077	-0.0659767	-0.136881	-0.51192	-0.188531	0.382576	-0.489872	-0.140152	-0.957641	4.54484	-0.241159	0.373242	-0.304683	-0.675618	-0.957641	-0.957641	-0.532267	1.39969	-0.13361	0.274528	-0.806584	-0.957641	0.621657	-0.401986	1.7337	-0.254183	-0.957641	-0.379349	-0.236285	1.02764	-0.284351
NADK	-0.333533	-0.547775	-0.427984	-0.274169	-0.52247	-0.438119	-0.658045	-0.301535	0.102199	-0.59144	-0.350301	1.31165	-0.271282	-0.428823	-0.326653	-0.448568	0.196184	1.44792	-0.202467	-0.0675332	0.118722	-0.482641	-0.801423	2.73254	-0.0200364	0.524281	-0.214962	-0.723247	4.47798	-0.539715	-0.332041	-0.403242	-0.409839	0.148163	-0.204236	-0.19858	-0.551223	0.0122452
GNB1	-0.491677	-0.751067	-1.07155	-1.00636	-1.16555	-0.899408	-0.71576	-0.227249	0.720407	1.80783	1.31062	1.01076	-0.846112	0.0694345	1.20364	0.784536	1.93455	1.19807	-0.895015	-0.037463	-0.325597	-0.723846	0.955018	0.706744	0.047598	0.854216	0.852691	-1.83008	1.43713	1.09564	-1.13579	-1.0686	-1.32894	-0.0208261	-0.0553298	-1.10028	-0.614967	0.322585
TMEM52	-0.487143	-0.487143	-0.359162	-0.385515	-0.487143	-0.0139626	-0.487143	0.435483	0.205139	-0.487143	-0.23428	-0.487143	-0.204237	-0.487143	-0.487143	-0.487143	-0.487143	-0.487143	2.74466	-0.121373	-0.318801	-0.140511	-0.487143	0.190899	-0.487143	-0.487143	-0.0818203	0.835697	-0.487143	4.46782	-0.336319	-0.487143	1.80411	-0.487143	0.532228	0.057718	-0.309194	-0.487143
CFAP74	-0.156987	-0.140962	-0.187019	-0.133107	-0.187019	-0.157494	-0.187019	-0.187019	-0.187019	-0.0989832	-0.187019	-0.150676	-0.174658	-0.187019	-0.056751	-0.187019	-0.187019	-0.187019	5.99448	-0.187019	-0.180936	-0.187019	-0.187019	0.0141706	-0.187019	-0.170899	-0.187019	-0.187019	-0.187019	-0.187019	-0.148172	-0.187019	-0.187019	-0.187019	-0.187019	-0.173018	0.0190705	-0.170652
GABRD	-0.268247	-0.268247	-0.268247	-0.0154659	-0.268247	-0.115107	-0.139105	-0.268247	-0.192657	-0.0992466	-0.16466	-0.193343	-0.206693	-0.188821	-0.268247	1.75893	5.66639	-0.0830074	-0.0643525	-0.144133	-0.241957	-0.268247	-0.268247	-0.268247	-0.268247	-0.268247	-0.268247	-0.268247	-0.268247	-0.268247	-0.221146	-0.268247	-0.268247	-0.268247	0.0897325	-0.186006	-0.268247	-0.16266
PRKCZ	-0.00386953	-0.14044	-0.519875	-0.383461	-0.201405	0.204372	-0.325942	-0.525953	-0.483474	-0.29259	-0.438607	-0.446007	1.49928	-0.309808	-0.427171	0.332031	-0.525953	-0.434181	0.762712	-0.374987	-0.453981	-0.407239	-0.270475	0.391917	-0.224908	-0.430597	-0.471493	-0.458067	-0.525953	0.139587	-0.0495234	0.010983	-0.0606757	-0.153319	5.15226	1.73655	-0.525953	-0.363786
FAAP20	0.883529	-0.0979062	-0.290708	0.225538	-0.575494	0.520045	-0.608792	-0.512726	0.235421	-1.09579	-0.683319	0.884762	0.0126218	0.271475	-0.204723	1.33348	0.254706	0.926626	-0.0955806	0.42681	-0.916997	0.272662	0.261187	-1.56567	-0.769451	0.208677	0.849683	-1.53837	3.95142	0.109352	-0.607411	-1.78984	-1.3262	0.910869	0.0275287	0.368034	0.196491	-0.451937
SKI	-0.155331	-0.151058	0.330159	0.416247	-0.895953	-0.1575	-0.522827	0.469722	-0.0472473	1.09838	1.57855	-0.947044	-0.237646	-0.446151	1.91548	0.650465	3.37159	-0.806004	-0.888781	0.223569	-0.15864	-0.568313	-0.921194	0.567155	-0.261804	0.30009	0.357266	-1.39911	-1.52937	0.470043	-0.959793	-1.21681	-1.13531	0.552461	-0.658629	-0.493428	1.07741	1.17936
MORN1	-0.400749	-0.335859	-0.255275	-0.0530249	-0.255365	-0.0122086	-0.312601	-0.0980433	-0.145741	-0.0711596	-0.310139	-0.313101	-0.0539411	-0.398791	-0.252551	-0.449306	-0.449306	-0.203028	5.74576	-0.273652	-0.373893	-0.12804	0.385866	-0.162508	-0.22563	-0.363671	-0.220055	-0.382865	0.377131	0.267333	-0.0992314	1.04515	-0.449306	-0.449306	-0.070103	-0.2056	0.0958312	-0.143015
RER1	0.205384	-0.818832	2.53048	-0.132701	-0.62304	-0.461691	0.281469	0.818602	-0.302395	-0.266178	-0.506082	-0.822432	-0.0380884	1.20874	-1.00072	0.395456	-1.42792	0.378296	1.1792	-0.656886	1.09995	0.590182	-1.68036	-0.61564	0.57724	-0.274765	1.0774	-0.877782	1.40247	-0.328815	-0.278367	-2.43683	-0.447656	1.78482	1.37653	-0.129102	-0.430926	-0.349017
PEX10	-1.21358	-1.20479	1.07639	0.413328	-1.42679	0.563934	0.193013	0.477489	1.88079	0.302911	-0.266185	-0.673678	0.0501502	-0.536455	0.293803	-1.10317	1.05967	-0.517452	1.41157	0.00453461	0.428782	1.16105	-0.743668	-2.14424	-1.59434	-0.0300031	-0.220061	-0.910542	-0.135776	1.65414	0.313199	1.67524	-1.39192	1.38232	0.910925	-0.189682	-0.660301	-0.290601
PLCH2	0.168353	-0.0221179	-0.462957	-0.462957	0.75521	3.27342	-0.391883	-0.462957	-0.462957	-0.357954	-0.351662	-0.351679	0.346064	-0.462957	-0.462957	-0.462957	-0.462957	-0.27936	0.175566	-0.398	-0.443829	-0.144922	-0.462957	-0.462957	1.08593	-0.405978	-0.307789	-0.462957	-0.462957	0.591497	0.86703	4.28279	-0.462957	-0.462957	-0.462957	-0.396322	-0.462957	-0.287064
PANK4	0.211076	0.18749	-0.51415	-0.530619	0.371815	-0.171688	-0.250087	-0.151455	0.964145	0.450223	0.0938005	-0.129389	-0.433789	-0.222148	1.14462	-0.318096	0.646981	-0.738416	0.089143	-0.343409	-0.167871	0.124828	-1.19783	0.548644	2.08656	-0.487352	-0.340386	-0.988755	0.580103	4.45972	-0.334551	-1.19783	-0.964105	-1.19783	0.0254763	-0.335409	-0.342072	-0.627392
AL139246.5	0.578278	-0.0841449	-0.800508	-0.519707	-0.160185	-0.603986	-0.678643	0.497928	-0.215671	-0.686943	-0.552214	0.219267	-0.344677	-0.444854	-0.646179	0.362396	-0.800508	0.944287	1.10415	-0.360469	-0.622908	-0.564904	-0.616333	3.33203	2.46582	1.03733	2.12485	-0.72232	-0.800508	1.24292	-0.0134274	-0.800508	-0.800508	-0.800508	-0.545904	-0.620867	0.601258	-0.703115
TNFRSF14-AS1	0.534557	1.40723	-0.0577513	-0.647558	3.71613	-0.31197	1.28215	-0.779284	-0.779284	0.976582	0.153188	-0.507674	-0.127351	-0.454411	-0.179935	-0.779284	-0.779284	-0.236201	2.94941	-0.505536	-0.0649677	-0.779284	-0.779284	-0.51808	0.941234	-0.411611	-0.0352057	-0.0435986	-0.779284	-0.779284	0.374381	-0.355533	-0.779284	-0.779284	0.60157	-0.131663	-0.109051	-0.445491
TNFRSF14	1.00306	0.425489	-0.718128	-0.144296	1.18249	-0.531223	0.57794	-1.01826	-0.795526	0.945057	0.55259	0.388722	-0.733038	-0.485687	0.764645	1.53282	2.8067	0.696977	-0.436246	0.118152	0.469172	-0.51169	-1.56032	0.749748	1.06103	1.32086	0.00414876	-1.26031	0.422119	-0.252501	-0.217722	-1.50031	-1.80823	-1.41607	-0.589095	-1.29199	-0.164895	0.41382
PRXL2B	-0.558623	-0.454693	-1.25549	-0.997412	-0.821075	-0.430403	-0.0643168	0.867058	0.706955	1.41236	0.624435	-1.0074	-0.337221	-0.985328	0.629481	0.833022	1.83713	-1.02281	2.13649	0.668714	-0.822146	-1.22009	0.809682	-0.490405	-0.00937653	-0.688296	2.22105	-1.3061	-1.38564	0.942542	0.209295	-0.941851	-0.357591	0.491535	-0.460743	-0.64462	0.685232	1.18666
MMEL1	-0.449156	-0.557638	-0.453719	-0.419624	-0.557638	-0.354867	0.571762	1.02336	-0.557638	3.93354	1.94603	-0.448627	-0.386828	-0.557638	1.11378	-0.557638	-0.557638	-0.557638	0.0199929	0.054291	-0.170959	2.49397	-0.557638	-0.191183	-0.557638	-0.386215	0.0324074	-0.557638	-0.557638	-0.557638	0.48399	-0.557638	-0.557638	-0.557638	-0.403252	-0.501457	-0.557638	1.41497
TTC34	-0.23725	-0.293824	1.87299	-0.548967	0.304245	-0.123083	-0.221276	0.450893	1.04667	-0.382301	-0.118156	-0.349789	-0.102481	-0.323267	-0.548967	1.9018	-0.548967	0.0634602	4.82274	-0.437245	-0.381596	-0.548967	-0.548967	-0.548967	0.427814	0.0494661	-0.21334	0.0470535	-0.548967	-0.548967	-0.134009	-0.548967	-0.548967	-0.548967	-0.341335	-0.474009	-0.548967	-0.26657
LINC00982	-0.471219	-0.502286	-0.502286	-0.502286	-0.502286	0.107062	-0.502286	1.69767	-0.502286	-0.502286	-0.334376	-0.502286	0.81797	-0.502286	0.780376	-0.502286	2.31564	-0.502286	0.223542	-0.474516	-0.492497	-0.502286	3.54258	-0.502286	-0.502286	-0.502286	-0.502286	-0.465356	-0.502286	0.547084	-0.330702	-0.502286	-0.502286	0.173526	2.85831	-0.00933898	-0.502286	-0.440026
PRDM16	-0.381465	-0.364545	-0.32293	-0.316738	-0.596338	1.2913	-0.452257	1.5117	-0.348664	-0.319521	-0.397336	-0.568423	2.61133	-0.596338	2.89169	-0.596338	-0.596338	-0.596338	0.378622	-0.51077	-0.58154	-0.596338	1.51498	-0.596338	-0.459313	-0.584373	-0.596338	-0.596338	-0.596338	-0.596338	-0.0176929	-0.129914	-0.596338	-0.596338	2.70178	0.927248	-0.0318971	-0.288886
ARHGEF16	-0.383771	-0.374565	-0.308865	-0.416107	-0.511276	1.72553	-0.4627	-0.511276	-0.114974	-0.412211	-0.288093	-0.460041	0.392556	-0.466118	-0.197784	-0.511276	-0.511276	-0.320931	0.21008	-0.511276	-0.451822	0.267412	-0.511276	-0.511276	-0.511276	-0.469725	-0.511276	-0.430172	-0.511276	4.27066	0.543727	-0.511276	2.10743	-0.511276	2.19525	0.589795	-0.116595	-0.492663
MEGF6	-0.554365	-0.260877	2.02903	2.67865	-0.489554	-0.117111	-0.450885	0.968275	-0.0649745	-0.586402	-0.353253	-0.641321	-0.298002	-0.604097	0.603315	3.20028	0.278524	-0.744391	-0.568979	0.444918	-0.710365	-0.0351854	-0.786965	-0.294596	-0.686699	-0.664847	-0.540044	-0.770624	-0.786965	-0.247492	-0.657737	-0.786965	-0.658984	-0.447524	2.18605	0.418173	0.440123	0.561863
TPRG1L	0.131034	0.0180978	-0.658558	0.278982	-1.107	-0.410461	0.301746	-0.180853	-0.0494778	1.65108	1.12735	-0.611701	-0.344322	-1.24862	0.781456	1.04584	-1.89127	-0.190305	2.10234	0.329057	-0.399483	0.161283	-1.38015	1.51575	-0.816614	-0.525176	0.472459	-1.43187	0.434081	-0.379383	-0.75705	-1.46283	0.252814	-0.74666	0.979544	-0.453245	2.29119	1.17092
WRAP73	1.68617	0.375574	0.469935	0.0787197	0.636305	-0.600802	-0.301476	0.403068	0.368542	1.28106	0.910747	-0.404746	-0.0947761	0.0231413	0.308819	-1.08157	0.819689	-0.740748	0.0830607	-0.674107	-0.261939	0.126187	3.53978	-2.06942	1.15735	-0.305118	0.224509	-1.54175	0.68449	-0.29052	-0.848668	-0.884143	-1.74212	-0.593717	0.0958916	-0.783426	-0.357847	0.303864
TP73	-0.219193	-0.200741	-0.228853	-0.228853	-0.228853	0.755758	-0.217533	-0.228853	-0.228853	-0.214	-0.212293	-0.228853	-0.211086	-0.220087	-0.228853	0.490635	-0.228853	-0.119501	5.88631	-0.228853	-0.218104	-0.228853	-0.228853	-0.228853	-0.101075	-0.228853	-0.228853	-0.0742971	-0.228853	-0.228853	-0.0347627	-0.228853	-0.228853	-0.228853	-0.107883	-0.203008	-0.228853	-0.20208
TP73-AS1	-1.19602	0.388539	0.791036	1.77771	0.865184	0.555696	-1.1688	0.0271016	-1.11066	0.500079	0.943964	-0.424525	1.37416	-0.4562	1.57666	-0.178066	-1.75437	-0.425198	-0.309378	1.08442	-0.832327	-0.663495	0.708089	-1.75437	0.193166	-0.141435	1.31736	-1.47082	0.682335	-0.125852	-0.0979841	-1.07626	-1.75437	-0.458256	1.70277	-0.30491	0.313246	0.901792
SMIM1	-0.619492	-0.363326	-0.838809	-0.22946	0.109744	0.487224	1.19211	0.357637	-0.860083	-0.557814	-0.620734	-0.670528	2.58304	-0.703402	0.00230651	0.422876	-0.860083	-0.547791	0.180205	-0.381451	-0.809648	0.451586	-0.860083	-0.860083	-0.370714	-0.76883	-0.511943	0.173902	-0.860083	2.93993	0.0590605	0.0859403	2.00491	-0.860083	1.07876	2.06473	-0.527008	-0.512504
LRRC47	0.620011	0.51317	-1.65038	-0.255692	-0.0341431	0.356587	-0.214418	0.0240907	1.1468	1.51002	0.590908	0.175725	0.261407	-0.917623	0.723677	1.3293	-1.08895	-0.267403	-0.10812	-0.0115825	-0.770219	-1.51092	3.43592	-2.02519	0.596025	-0.274722	0.179016	-0.894722	-1.07196	0.73793	-0.680094	-0.282138	-0.821654	1.23278	0.095943	0.148384	-0.63992	-0.157839
CEP104	0.151723	0.233646	-0.563405	-0.472112	-0.693013	-0.107879	-0.660389	-1.11406	1.05508	0.26094	0.3406	-0.439661	0.574653	0.143238	-0.433014	0.936007	0.708432	-0.594973	2.20124	-0.623605	-0.366895	0.456225	-1.70558	-1.21304	0.845715	-0.152774	0.450241	-0.946503	3.68199	1.08927	-0.370597	-1.07558	-0.669093	-1.01188	0.50982	0.539903	-0.738561	-0.226118
C1orf174	1.34628	-0.50343	1.42203	-0.922511	-0.0233855	0.302477	1.68734	-0.474902	-0.539739	0.0834376	-0.153707	-0.324851	-0.111788	-0.169826	-0.345439	0.0577654	-1.06277	-0.243481	-0.268637	0.375408	0.795215	-0.307404	0.730236	-1.93442	3.13632	0.50626	1.24657	-1.50563	-1.04436	0.966559	-0.39512	-2.00741	-0.668008	0.47246	-0.063949	-0.711258	0.764657	-0.110994
NPHP4	-0.3451	-0.41673	-0.589636	0.131082	-0.80775	-0.117105	-0.392853	0.202682	-0.80775	-0.593859	0.190223	0.184294	0.826921	0.283068	-0.273397	-0.80775	-0.80775	-0.475909	4.51319	0.0844128	-0.0872148	1.63905	0.988363	0.523753	-0.80775	-0.187375	-0.320502	-0.567818	-0.80775	-0.80775	-0.170703	-0.80775	-0.80775	1.89186	0.126536	0.3168	-0.409438	0.315155
KCNAB2	1.32558	0.600419	-0.741376	-0.656754	0.0418403	-0.634289	-0.00633932	-0.432784	-0.649164	-0.687557	-0.597561	1.44565	-0.670829	0.225963	-0.666616	-0.83448	1.23694	2.04527	-0.361457	-0.596076	1.46584	-0.351871	-0.83448	0.739752	3.11254	1.86636	-0.127614	-0.608037	1.12304	-0.722069	-0.662235	-0.610344	-0.463242	-0.478295	-0.775561	-0.707492	-0.694146	-0.658535
RPL22	0.429253	1.94211	-0.0649533	-0.108408	1.21528	1.07582	0.927727	-0.369289	2.15174	-1.34722	-1.24873	0.560807	0.910121	0.212543	-0.609187	0.0833997	-0.413165	0.914495	-1.03363	1.25624	-0.68858	0.448029	0.259367	-2.14022	-0.65704	0.206796	-1.08277	-1.74692	1.15433	-1.21464	-0.417546	-0.68463	-0.00748668	1.13262	-0.930353	0.432066	-0.602099	0.0541167
RNF207	-0.547453	-0.220809	-0.414957	-0.0854617	-0.600743	3.73492	-0.630751	0.188815	0.141429	-0.355602	-0.389984	-0.624531	1.92053	-0.527132	-0.477747	0.981424	-0.747059	-0.747059	0.717887	-0.274868	-0.719178	-0.100365	-0.747059	-0.747059	-0.747059	-0.515752	-0.137558	-0.529208	-0.747059	0.419991	2.83112	-0.261102	-0.747059	-0.16441	1.11144	-0.228815	0.832483	0.155794
ICMT	-0.57165	-0.70514	-0.427936	-0.736249	-1.43305	-0.463496	-0.887056	1.32888	1.3178	-0.0436022	-0.197873	-0.650146	0.273631	-1.02981	-0.672556	0.193874	3.3829	-0.596656	1.78813	0.444385	-0.430784	0.224477	-0.159587	-1.12964	-0.887993	-0.522501	0.772273	-1.06964	-1.57891	-0.411303	-0.113939	0.577477	0.530416	1.28748	0.986141	0.553159	1.02081	0.0376857
GPR153	-0.182098	-0.473475	1.0664	3.64212	-0.516397	-0.360524	1.14952	-0.0721316	-0.516397	-0.410065	-0.516397	-0.404804	-0.444471	-0.164122	-0.516397	-0.516397	-0.516397	-0.516397	-0.479784	-0.484326	0.591965	0.0377666	-0.516397	-0.516397	1.6258	-0.329059	3.44612	-0.465114	-0.516397	-0.516397	-0.141656	-0.516397	-0.516397	0.723349	-0.492907	-0.437449	0.199866	-0.427745
ACOT7	-0.262491	-0.519198	-0.603215	-0.201526	-0.378688	-0.234617	5.55822	-0.429841	0.20679	0.163822	-0.0152618	-0.510942	-0.430626	0.730557	-0.174115	-0.0889465	-0.357747	-0.563441	-0.359731	-0.235618	1.36068	-0.0162484	-0.295991	-0.43246	0.274642	-0.453173	-0.184243	-0.54451	0.357945	-0.110217	-0.322082	-0.234671	-0.263346	0.147146	-0.100069	-0.277817	-0.215066	0.0160965
HES2	-0.297746	-0.32054	-0.509004	0.124078	-0.509004	0.173968	0.278336	-0.206656	-0.509004	-0.148497	-0.32518	-0.361837	-0.360654	-0.291013	-0.131451	1.71554	-0.509004	-0.35222	3.10366	-0.246856	4.39269	-0.0505778	-0.509004	-0.509004	-0.509004	-0.414512	0.0910838	0.0493692	-0.509004	0.708654	-0.0865111	-0.509004	-0.509004	-0.509004	-0.219943	-0.380271	-0.392632	-0.451239
ESPN	-0.252004	-0.0275764	-0.343524	-0.343524	-0.343524	0.166119	-0.329281	0.134957	-0.343524	-0.295398	-0.343524	-0.335219	0.308244	-0.313291	-0.343524	-0.343524	-0.343524	-0.272642	4.17335	-0.314867	-0.249449	-0.343524	0.00324249	-0.343524	-0.143921	-0.343524	-0.343524	-0.323676	-0.343524	4.04686	0.357514	-0.142491	-0.343524	-0.343524	-0.0807471	-0.269812	-0.343524	-0.343524
TNFRSF25	1.88362	5.11481	-0.420177	-0.401032	0.0585442	-0.0886337	-0.442491	-0.365106	0.984571	-0.243327	0.442557	-0.360077	-0.0720539	-0.357835	0.263935	-0.471011	-0.471011	-0.334897	-0.062274	-0.280251	-0.452785	-0.471011	-0.471011	-0.471011	0.995829	-0.291784	-0.471011	-0.471011	-0.471011	-0.471011	-0.35001	0.722681	-0.471011	-0.471011	-0.217268	-0.370794	-0.471011	0.296381
PLEKHG5	-0.471005	-0.379262	-0.0841219	-0.238399	0.20489	0.319964	-0.621	-0.621	2.75542	0.698392	2.58912	-0.55715	-0.298223	-0.48689	1.56808	3.08134	-0.621	-0.621	-0.341924	-0.115423	-0.57141	-0.316421	-0.621	-0.621	-0.621	-0.548829	-0.621	-0.621	1.6828	-0.621	-0.21269	-0.250032	-0.621	-0.621	-0.0662271	-0.284293	-0.621	0.395298
NOL9	0.728053	0.563256	-1.13792	-0.189607	-0.981279	0.372643	-0.677118	1.08893	3.29833	0.297422	1.46959	-0.180651	0.499449	-0.633796	0.816853	0.268339	0.815065	-0.350902	-0.01951	0.613923	-0.805668	0.839461	-1.22525	-1.84888	0.89733	0.13943	0.867026	-1.07782	-1.84888	-0.505057	-0.528549	-1.1108	-0.528517	0.31887	0.896318	-0.171339	-0.974181	0.00543761
TAS1R1	-0.21683	-0.21683	-0.21683	1.42197	-0.21683	-0.203831	-0.21683	-0.21683	-0.21683	-0.21683	-0.21683	-0.21683	-0.176033	-0.21683	-0.21683	-0.21683	5.77951	-0.21683	-0.12692	-0.21683	-0.21427	-0.21683	-0.21683	-0.21683	-0.21683	-0.21683	-0.21683	-0.21683	-0.21683	-0.21683	0.143155	-0.21683	-0.21683	-0.21683	-0.21683	-0.183907	-0.21683	-0.151598
ZBTB48	0.146314	-0.199674	-0.875941	-0.724888	-0.184019	0.32196	2.92421	0.208869	-1.03938	0.0834056	-0.411347	-0.0847854	-0.527079	0.0172977	-0.0527787	-0.503975	1.63988	-0.619075	1.21688	-0.54438	-0.154331	-0.757397	2.91282	0.297479	1.05808	-0.331291	1.30488	-1.31605	0.126522	0.787363	-0.69292	-1.23672	0.705895	-1.37451	-0.489448	-0.722205	-0.120799	-0.788885
KLHL21	-0.115496	-0.165936	0.770423	0.432716	-1.13048	0.718033	-0.556147	-0.743164	-0.401084	-0.600816	-0.62968	-0.379348	-0.496129	-0.619232	-0.81547	0.150202	3.44043	0.167291	0.574508	-0.191509	-0.476685	-1.13048	2.50717	0.570761	-0.278702	-0.559757	-0.149761	-1.04842	-1.13048	-1.13048	-0.476181	1.75919	1.52488	0.888407	0.0308549	-0.193719	0.292727	-0.408439
PHF13	-0.759669	-0.101953	1.19683	1.24835	-0.759727	0.254529	-0.706299	0.960428	-1.24575	-0.0418246	0.344971	-0.411281	0.183058	-0.522031	0.393771	-0.171296	3.08939	-0.354768	-0.0669183	-0.631632	-0.465271	0.423421	-0.698631	-0.055489	-0.169385	-0.619876	-0.475752	-0.917419	-1.45137	-0.670316	-0.68658	-0.883189	0.656392	-0.0632749	1.42857	-0.492318	3.17086	0.0714534
THAP3	0.151198	-0.0918295	0.0479976	0.362263	-1.02068	0.211195	-0.245601	2.53826	-1.24523	0.512486	0.643782	-0.486231	-0.505188	-0.892271	-0.240703	-0.491634	-1.66144	-0.09283	-0.324608	0.126001	-0.518562	-0.772016	1.8604	-0.61484	0.201494	-0.434261	1.87368	-0.61949	-0.141842	2.14426	-0.784511	-1.66144	-0.427828	0.156235	1.78705	-0.747667	1.32376	0.0806362
DNAJC11	-0.500494	-1.00609	0.0650379	-0.316215	0.906309	-0.0508872	-0.512081	-0.75087	0.792131	0.539225	0.22934	-0.242846	-0.0822262	-0.359865	1.75159	-1.45363	-0.334213	0.0605326	-0.37632	-0.790574	-0.455762	-0.0271511	-1.32112	-1.12532	0.913766	0.230263	0.459793	-1.38831	3.81398	-1.73302	-0.301866	0.563993	1.31738	0.298212	0.460128	-0.00521058	0.0172558	0.715135
CAMTA1	-0.646591	-0.665747	-0.748836	-0.709524	-0.591221	0.909401	-0.63235	0.577918	0.743413	0.806719	0.207976	-0.221432	0.268684	0.134956	2.2366	0.293561	-1.65282	-0.479432	-0.41638	0.84561	-0.458401	-0.295718	1.6669	-1.82995	-1.05271	-0.348913	-0.475437	-1.28328	0.469617	3.24537	-0.129288	-0.697813	-0.774429	0.681191	0.307576	-0.214745	0.00731021	0.922222
VAMP3	-0.853339	-0.956466	-0.517793	-0.478736	-1.14653	-0.207678	-0.195381	0.530847	0.398807	2.73761	2.30111	0.312116	-0.493064	-0.391492	2.14625	1.02863	0.502108	0.220772	-0.720953	1.81172	-0.00674136	-0.791631	-0.896195	-0.757381	-0.569825	0.246914	0.552471	-1.08713	-0.604724	0.474458	-0.792192	-1.23558	-1.02595	-0.0561328	-0.207799	-0.534251	-0.13287	1.39601
PER3	-0.73891	-0.910551	0.742867	0.79983	-0.434073	0.946134	-0.172327	0.18552	-0.871136	0.295293	-0.0421209	-0.918652	0.609733	-0.370587	0.117504	1.4008	3.85519	-0.939017	0.719375	0.503704	-0.422944	0.278545	0.131474	-0.561268	-1.00325	-0.561578	-0.0186313	-1.12582	-1.20496	1.65815	-0.482385	-0.424927	-1.00693	-1.20496	1.42492	0.143256	-0.518396	0.121117
UTS2	2.53736	0.384188	-0.364539	-0.364539	-0.364539	-0.287448	0.704431	-0.364539	-0.364539	-0.218609	-0.343978	0.330271	-0.31158	-0.316703	-0.364539	-0.364539	-0.364539	0.0670406	-0.260028	-0.341843	-0.215721	-0.364539	0.557026	-0.364539	5.11894	0.0655719	-0.145582	-0.252125	-0.364539	-0.364539	-0.325779	-0.364539	-0.364539	-0.364539	-0.364539	-0.340788	-0.364539	-0.207485
TNFRSF9	2.26303	0.53414	-0.13951	-0.384953	-0.384953	-0.341045	0.36512	-0.384953	-0.384953	-0.384953	-0.384953	-0.279728	-0.32908	0.897051	-0.0931895	-0.384953	1.54403	-0.384953	-0.158862	-0.384953	-0.349972	-0.384953	-0.384953	-0.00337049	4.94487	-0.384953	-0.384953	-0.384953	-0.384953	-0.384953	-0.384953	-0.384953	-0.384953	-0.384953	-0.133986	-0.250526	-0.384953	-0.384953
PARK7	0.0981841	-0.441408	0.666941	-0.295254	-0.357577	0.260226	-0.216995	0.157916	0.617558	-0.865446	-0.888867	-0.420251	-0.449562	0.274534	-0.771385	0.921463	-1.11185	-0.38271	0.473223	-0.247233	-0.276943	0.123169	-0.624491	-1.41848	-0.0789303	-0.676409	-0.0437252	-1.20684	3.85918	2.81677	-0.159945	-0.368697	-0.210981	1.60773	-0.223339	0.329169	0.0873714	-0.556118
AL034417.3	-0.260783	-0.0964215	-0.317764	0.143191	-0.317764	-0.160578	-0.317764	-0.317764	-0.317764	-0.103824	-0.280761	-0.317764	-0.162881	-0.317764	-0.317764	-0.317764	-0.317764	-0.317764	-0.162909	-0.283319	-0.304442	-0.317764	-0.317764	-0.317764	0.322105	-0.294622	-0.317764	-0.317764	-0.317764	0.527434	-0.20462	5.71351	0.0522669	-0.317764	0.37496	1.18153	-0.0695905	-0.210492
ERRFI1	-0.811729	-0.755285	0.864489	0.744676	-0.944477	0.69524	-0.874607	0.566442	-0.718004	-0.363259	-0.221386	-0.853472	0.795189	-0.686541	0.0862999	0.205612	2.53954	-0.885907	-0.36409	0.187972	-0.820085	0.167008	0.0716716	-0.700617	-0.872801	-0.868823	-0.60594	-0.91048	-0.944477	-0.68389	-0.153632	2.35587	-0.513108	-0.221491	2.49035	2.00366	0.221054	0.77902
AL034417.2	-0.178238	-0.573142	-0.573142	0.344827	-0.573142	0.5652	-0.573142	1.21453	0.0566473	-0.573142	-0.573142	-0.557241	0.00988461	-0.427	-0.573142	-0.573142	-0.573142	0.0610137	-0.404351	-0.573142	-0.54518	-0.573142	2.90101	-0.573142	-0.573142	-0.476892	-0.573142	-0.573142	-0.573142	-0.573142	0.486075	0.600873	-0.573142	2.03311	0.597293	0.66874	3.72487	-0.358603
RERE	-0.932842	-0.455021	-1.0017	0.134131	-0.223688	0.39866	-0.544774	0.590889	1.07216	0.459029	0.621683	-1.0119	0.655567	-1.2547	-0.0229884	1.54197	1.55923	-0.985473	0.301279	0.804527	-1.52745	-1.59038	1.72472	-0.540106	-0.834733	-0.339288	1.35376	-1.66196	0.0684096	2.64408	-0.200675	-0.709408	0.0780507	-0.440935	-0.413111	-0.648576	0.663384	0.668182
ENO1	0.0291243	-0.222605	0.231814	-0.778555	-0.339158	0.204492	-0.403903	-0.683937	2.92251	-1.04315	-1.0493	1.32775	-0.22807	0.875097	-0.75902	-0.677014	-0.60253	0.772238	-0.527279	-0.325303	-0.120862	0.927873	-0.0581727	0.289171	-0.0630271	0.164638	-0.914417	-1.19275	-0.61678	-0.50984	-0.365965	-0.102551	-0.819986	1.78523	1.27512	3.03687	-0.850385	-0.587368
ENO1-AS1	0.639899	0.487905	-0.49323	0.138616	-0.49323	0.454791	-0.49323	-0.49323	-0.49323	-0.271321	-0.307723	-0.145983	0.564745	-0.44337	-0.000281312	-0.49323	-0.49323	0.843797	1.54344	-0.26393	-0.419254	-0.49323	-0.49323	-0.49323	-0.49323	0.122391	-0.49323	-0.126098	-0.49323	5.30171	0.00540848	-0.49323	0.0418708	-0.49323	-0.134651	0.0311358	-0.49323	-0.171418
GPR157	-0.387104	-0.186692	-0.588823	2.0502	-0.454994	0.0906068	-0.0928416	-0.3055	0.0405847	-0.474342	-0.543879	-0.380999	-0.00112408	3.62561	-0.416737	-0.727551	1.2319	-0.619918	-0.115505	-0.191504	0.011461	-0.727551	3.38527	-0.727551	-0.458682	-0.561545	-0.625409	-0.555412	-0.727551	-0.727551	0.0613406	0.32448	0.335401	-0.302557	-0.120852	0.391711	-0.0928737	-0.433516
MIR34AHG	-0.230466	-0.135526	0.130647	2.69982	-0.794135	0.437852	-0.298758	-0.794135	-0.794135	-0.74911	-0.681469	-0.637704	0.631748	-0.281899	-0.672978	-0.794135	-0.794135	-0.411508	0.880206	-0.447503	1.72974	-0.794135	3.12187	-0.794135	0.155852	0.631501	0.281743	-0.693132	-0.794135	-0.794135	0.76445	2.10462	-0.794135	-0.794135	0.382792	0.106363	-0.0472122	-0.0364627
LNCTAM34A	-0.310933	-0.163245	-0.310933	-0.093335	-0.310933	0.683432	-0.15482	-0.310933	-0.310933	-0.182008	-0.310933	-0.310933	-0.0783766	-0.198173	-0.310933	-0.0368115	5.74283	-0.102739	0.976174	-0.268745	-0.0556242	-0.310933	-0.310933	-0.310933	-0.310933	0.0141692	-0.310933	-0.310933	-0.310933	-0.310933	0.1282	-0.310933	-0.310933	-0.310933	0.531591	-0.212935	-0.310933	-0.310933
H6PD	-0.891921	-0.963549	1.45308	1.52664	-0.788906	-0.0604736	-0.83288	-0.9291	0.798828	1.186	0.907495	-0.426509	0.0052477	-0.814053	0.0824251	-0.178137	2.67	-0.488481	-0.31289	0.57128	-0.367061	3.24829	-0.440784	-0.0224609	-0.737843	-0.163465	0.0781257	-1.41183	-0.457947	-1.47528	-0.286899	-0.686703	0.290081	-0.193886	-0.0203182	-0.483092	0.0164739	0.600503
SPSB1	-0.574179	-0.642381	3.66725	1.45927	-0.822642	0.348461	-0.0343373	0.761712	0.977208	-0.34862	-0.362717	-0.736452	-0.148394	-0.748521	-0.496504	2.93799	-0.109092	-0.739244	1.42865	-0.348536	-0.462891	-0.10182	-0.822642	-0.822642	-0.732815	-0.715286	-0.269212	-0.805584	-0.822642	0.125908	-0.255032	0.161287	-0.822642	0.236197	0.380356	-0.287398	0.525258	0.0226893
SLC25A33	-0.0338494	-0.480223	-0.160338	0.314085	0.0784053	-0.551515	0.127604	1.11812	0.228085	-1.04735	-0.860044	-0.890564	-0.0440816	2.39145	-0.416082	-0.31277	-0.607149	-1.03833	0.169472	-0.657952	0.700016	0.0300162	3.09317	-1.09742	0.42421	-0.463705	0.118696	-0.983357	-1.49325	0.575551	-0.235889	-0.663629	0.997149	2.55139	-0.258864	0.624061	-0.459235	-0.785903
TMEM201	-0.771137	-0.649681	0.940978	-0.32907	0.247727	0.123753	0.0231904	-1.09892	0.0414253	-0.283205	-0.00960162	-0.438196	-0.286282	-0.591574	-1.00215	-1.09892	1.2649	0.0888962	0.220319	-0.69384	-0.598	-0.0724654	-0.392235	-0.837457	0.741454	-0.414669	0.64722	-0.945412	1.71693	3.50844	-0.213063	-1.09892	1.9259	-1.09892	-0.0182871	-0.228063	1.9593	-0.280353
PIK3CD	1.34692	0.751902	-0.556293	-0.539634	0.270877	-0.581568	-0.0105286	-0.380965	-0.71201	-0.631302	-0.67559	1.11332	-0.490661	0.0496923	-0.541645	-0.523403	-0.71201	0.844949	-0.299431	-0.566825	-0.331152	0.189832	-0.517534	3.11277	2.27812	0.641402	-0.307522	-0.594983	3.07863	-0.129999	-0.604362	-0.71201	-0.474141	-0.71201	-0.256556	-0.643387	-0.586415	-0.586481
PIK3CD-AS2	-0.371845	-0.141215	0.141689	-0.364137	-0.250197	3.04802	0.90567	-0.62889	-0.592429	-0.864111	-0.736541	-0.813015	2.29163	-0.649985	-0.70993	0.963482	-0.864111	-0.864111	0.669371	-0.820842	-0.694923	1.19886	0.855107	-0.226109	-0.511113	-0.50772	2.00115	0.395392	-0.864111	1.17402	-0.190911	-0.864111	-0.864111	-0.864111	0.0280547	0.103436	1.28673	-0.804036
CLSTN1	0.0206563	-0.532486	0.298904	0.103156	-0.749029	2.23948	-0.857998	-0.385001	0.882084	0.978274	0.745705	-0.766118	-0.215473	-0.824645	-0.167684	0.929157	3.32382	-0.79713	2.11755	0.000292276	-1.03536	-1.00705	-0.83112	-1.2968	0.118624	-0.657273	0.95933	-1.21741	-0.178346	0.709073	0.194557	-0.399942	-0.179296	-0.755783	0.0485646	-0.915814	0.0901902	0.0103377
CTNNBIP1	-0.0690692	-0.47267	-0.71832	-0.462202	-0.682321	0.202194	-0.347404	-0.756931	-0.0333974	-0.224062	-0.228998	0.482134	1.31361	1.1525	-0.0860212	-0.465456	-0.761972	0.343931	-0.415159	-0.0853301	-0.219676	-0.965979	-1.02761	-0.626294	-0.0126871	0.117589	-0.219572	-0.753927	-0.410755	0.126282	0.426148	-0.445947	1.62299	-0.988025	4.56244	1.46466	-0.387359	0.0526699
LZIC	0.588069	0.384013	-0.734504	-0.134271	-1.04424	0.0958271	-0.204256	-1.00119	0.261722	0.200537	0.532213	1.21409	-0.391274	-0.193196	0.152991	1.43588	-1.12909	0.684702	1.38575	-0.406714	0.125786	-0.740191	-0.979279	-1.68832	0.132864	0.724495	2.69035	-1.61993	1.77047	1.30288	-0.796342	-1.27377	-1.36712	0.943601	-0.547287	-0.882488	0.22501	0.28222
NMNAT1	-0.44352	-0.692484	-1.2992	-0.174111	0.510703	0.529226	-0.429691	-0.838793	2.22937	0.435168	0.656438	0.333021	-0.388406	-0.437886	0.582059	-0.399167	-1.4755	0.133118	-0.0162048	0.879098	-0.120552	1.65784	-0.644107	0.61025	1.67232	0.404341	-0.23535	-1.4494	2.33935	-1.4755	-0.0932041	-1.4755	-1.4755	-0.79457	0.0835367	-0.589771	1.27053	0.622069
RBP7	-0.543609	-0.558709	-0.584915	-0.559063	-0.596953	-0.43954	-0.536006	-0.588368	-0.0938174	-0.527295	-0.304811	2.76745	-0.551232	-0.498658	0.989068	1.18801	-0.596953	2.63207	-0.52633	2.80205	-0.0454031	-0.0274524	-0.0643772	0.220129	-0.461042	1.5839	-0.466568	-0.584808	-0.596953	-0.596953	-0.529871	-0.596953	0.145064	-0.596953	-0.587177	-0.551269	-0.57225	1.45654
UBE4B	-0.101532	-0.769014	-0.305376	0.170577	0.445753	0.490102	-0.768069	1.01582	-0.338887	-0.103204	-0.0131795	1.25322	0.98477	-1.21854	-0.33811	-1.08692	0.182493	0.0371412	0.0873016	-0.0821078	-0.621952	0.521857	0.678381	0.441953	1.37925	1.13718	3.30378	-1.61893	-0.699835	1.22222	-0.5409	-1.54312	-1.4369	-1.65354	0.0725993	-0.0120726	-0.859746	0.687526
KIF1B	-0.575064	-0.704778	-0.285648	0.197739	-0.896181	-0.38288	-0.904749	-0.176743	0.293198	0.646566	0.998364	0.0411236	-0.443506	-0.727159	0.360285	0.0183389	0.65904	-0.063573	-0.450045	0.00175286	-0.317123	-1.00111	0.167612	4.65729	-0.441577	0.0422963	1.85778	-1.07086	-0.345525	-0.122079	-0.644059	-0.228274	-0.810399	-0.630395	0.176192	-0.396132	1.32831	0.171977
AL139424.2	-0.124524	-0.161954	-0.255714	-0.255714	0.670153	-0.153054	-0.227774	-0.255714	-0.255714	-0.255714	-0.220285	-0.15492	-0.0652347	-0.18264	-0.0673087	-0.255714	-0.255714	0.0521794	-0.110863	0.115585	-0.18925	-0.255714	5.9117	-0.255714	-0.255714	0.0761023	0.0288864	-0.255714	-0.255714	-0.255714	-0.185696	-0.255714	-0.255714	-0.255714	-0.255714	-0.152535	-0.255714	-0.255714
PGD	-0.548918	-0.529687	-0.232192	-0.504934	-0.368845	-0.108063	-0.176272	-0.542973	-0.379696	-0.57644	-0.51663	2.75904	-0.279504	-0.125693	-0.528707	-0.638497	-0.432502	1.71983	-0.363302	-0.494294	1.24915	-0.410675	-0.624658	3.95388	-0.25949	0.745499	-0.560595	-0.542963	-0.322116	1.6862	0.0875871	-0.0884536	-0.172569	-0.602472	-0.20364	0.0228025	-0.581	-0.508207
CENPS	-0.38842	-0.442754	-0.665152	0.446746	-0.435915	0.298661	-0.410113	-0.00461676	-0.112096	-0.351787	-0.521709	-0.683486	0.330219	-0.103072	0.389685	-0.87762	-0.87762	-0.262423	4.72536	-0.257426	-0.482559	-0.281957	-0.87762	-0.87762	-0.87762	-0.702953	0.186652	-0.503869	2.33614	-0.135449	0.396503	0.416403	-0.251662	0.441369	0.591608	0.739525	0.18602	-0.0993695
DFFA	-0.427643	-0.582422	-0.470839	-0.533261	-1.42387	0.238797	-0.128965	0.408442	2.62649	0.460565	0.258523	-0.526816	-0.102732	-0.919607	1.1743	0.269228	1.34942	-0.32398	-0.167675	0.22628	-0.350568	0.372639	1.69086	-1.20269	0.129249	-0.56742	0.486369	-1.39384	2.93019	-1.50511	-0.577846	-0.394207	-1.1795	-0.793323	0.595608	0.021569	-0.56751	0.901299
PEX14	0.243829	-0.553303	0.565565	-0.705667	-0.739567	-0.00229767	-0.166145	1.52135	0.128901	-0.378174	-0.048659	-0.57783	-0.654292	-0.332638	-0.714269	-0.331287	-1.56257	-0.626976	2.57526	-0.36424	1.98741	1.19978	1.26963	-1.31823	0.0711264	-0.838816	0.0167563	-1.38545	0.411754	1.32583	-0.278597	-1.56257	0.702659	-1.01614	1.50074	-0.493101	1.3395	-0.209255
CASZ1	-0.50133	-0.61077	-0.69316	-0.61942	-0.353892	0.661642	-0.740654	-0.545473	-0.432064	2.29784	2.43723	-0.736393	0.644796	-0.718327	1.89424	-0.500264	-0.834359	-0.816711	2.535	-0.342381	-0.696806	-0.668759	-0.18816	-0.612081	-0.390389	-0.739391	-0.586499	-0.803163	-0.834359	0.971346	0.253901	0.705234	-0.126198	-0.335946	1.84477	0.441298	-0.621802	0.361457
TARDBP	0.908776	0.551647	-1.62714	0.169686	0.111213	0.632167	-0.447508	0.422224	0.704192	-0.146265	0.865886	0.134121	0.986961	-0.815517	0.879528	-0.216761	0.111761	0.137982	0.421803	-0.294495	-0.849821	-0.670693	-0.321872	-2.33383	2.89077	0.498653	-0.0643078	-2.03549	-0.1662	-0.0776635	-2.66987e-05	-1.76178	-1.51121	1.71053	-0.000747094	0.227251	0.41141	0.564769
SRM	-0.164917	-0.213432	2.26804	-0.204615	-0.356309	-0.497459	-0.244394	-0.299961	2.14127	-0.596044	-0.545553	-0.382071	-0.57736	-0.219631	-0.404062	-0.687635	-0.151102	-0.291386	-0.636459	-0.104169	-0.280738	-0.139282	0.0156973	-0.654095	-0.41912	-0.289343	-0.494824	0.256732	-0.0107386	1.97413	-0.524164	-0.328819	-0.141497	4.26007	-0.541464	0.319015	-0.371251	-0.463047
EXOSC10	-0.10383	0.362422	-0.7126	-0.334367	0.550904	0.136759	-0.109329	-0.175743	1.00613	0.126093	0.440684	-0.199767	-0.00112364	-0.334382	0.0974906	-1.35884	3.3125	-0.552294	0.537631	-0.0905809	-0.226289	-0.833601	-0.671686	-1.37799	0.786108	0.103816	-0.303681	-0.961944	-1.49618	3.49037	-0.417695	-1.0273	-0.354361	0.075815	0.503527	-0.387943	0.333711	0.167569
EXOSC10-AS1	-0.0909844	-0.35383	-0.35383	-0.35383	-0.35383	0.0793771	-0.269826	-0.35383	-0.35383	-0.35383	-0.35383	-0.00818	-0.159243	0.698378	-0.35383	-0.35383	-0.35383	-0.35383	1.00785	-0.168184	0.487375	-0.35383	-0.35383	-0.35383	-0.35383	-0.123233	-0.35383	-0.35383	-0.35383	5.54378	-0.120371	-0.35383	1.22544	-0.35383	-0.313898	0.00725825	-0.35383	-0.0112778
MTOR	0.781096	0.0348279	-0.401369	-0.557177	-0.926567	0.0686242	-0.485176	-0.881017	0.523039	0.457433	0.641534	0.0343515	-0.315977	-0.263766	0.452263	0.353938	0.511067	1.26012	-0.289696	-0.203407	-0.342756	-0.483059	-1.48057	-1.20778	1.67082	-0.186081	0.989377	-1.00757	-0.474719	-0.7341	-0.211901	-0.313207	-1.14689	4.38206	0.0253843	-0.0546227	-0.555699	0.337173
UBIAD1	0.543685	0.0831225	-0.795887	-0.588735	-0.399398	-0.0483224	-0.369543	0.0320047	2.36304	0.00368652	0.395983	-0.750112	-0.27208	-0.424064	0.141374	1.08254	-1.62056	-0.467144	-0.630525	-0.407903	-0.549415	0.4253	-1.27068	-1.41982	0.400962	-0.0739392	0.364789	-1.09453	1.83514	3.00771	-0.695975	-0.565612	-1.05671	1.90195	0.188004	-0.0615274	0.811192	-0.0180012
FBXO2	0.120371	-0.137546	-0.167213	0.107923	-0.146565	1.5564	-0.60539	-0.611622	-0.611622	-0.545143	-0.554162	-0.581533	0.0562688	-0.420474	-0.611622	0.859826	-0.611622	-0.611622	2.08866	-0.535722	-0.598	4.63047	-0.367199	-0.611622	0.0590505	-0.583239	-0.474037	-0.363759	-0.611622	1.09664	-0.123533	0.035504	-0.283044	0.181579	0.804987	-0.00773545	-0.280134	-0.5419
FBXO44	1.84236	0.353211	0.869897	1.21574	1.06897	0.669177	-0.496882	1.39735	-0.936516	-1.03472	-0.703808	-0.69749	-0.0180254	0.0622887	-0.0367092	1.37105	-1.10088	-0.329016	-0.153037	-0.513529	-0.678026	-0.496151	-1.10088	-1.10088	2.8509	-0.606502	-0.446783	-0.615426	2.07119	-0.47655	-0.249373	-1.10088	-1.10088	-0.32238	0.470651	-0.418196	1.02213	-0.531406
FBXO6	1.54205	-0.327981	-0.23959	-0.671215	-0.0334598	-0.462861	-0.507078	-1.22218	-1.02211	-0.671972	0.270108	0.13791	-0.609442	1.56303	1.09782	-0.331048	1.127	-0.0923064	1.91906	-0.56381	1.44019	0.374263	-1.22218	-0.0277694	3.256	-0.173121	-0.789156	-0.297475	1.31193	-0.421628	-0.507201	-1.04066	-1.22218	-0.335259	0.313296	-0.222037	-0.896345	-0.442597
MAD2L2	1.56129	0.252895	0.197364	-0.235984	0.206782	-0.42265	-0.587636	-0.776256	0.847657	1.10006	0.745013	0.685241	-0.650654	0.429103	1.42439	0.300348	-1.49103	0.133629	-1.0007	0.581969	-0.617533	0.0779005	-1.19611	-0.942498	3.69055	0.352054	-1.22229	-0.251248	0.607947	-1.07906	-0.932976	-1.49103	-0.220064	0.0184852	-0.533233	-0.611955	0.326139	0.724094
AGTRAP	0.243363	-0.299596	-0.0925303	-0.240922	-0.931877	-0.652689	0.892224	-0.855718	-0.0264876	0.166362	-0.0854953	2.82813	-0.70612	-0.500911	-0.0815152	0.897936	-0.406826	1.6742	0.361	-0.0644864	0.18112	0.619462	0.259237	3.31552	1.43446	0.731491	-0.563346	-1.07322	-1.00725	-0.822006	-0.84257	-1.12398	-0.973042	-0.694658	-0.374231	-0.450147	-0.463449	-0.271426
C1orf167	-0.214067	-0.272665	0.184557	-0.257376	-0.29858	-0.282234	-0.281404	-0.29858	0.119281	-0.0549774	0.0303909	-0.280057	-0.15176	-0.263418	-0.0969723	-0.0282485	-0.29858	-0.29858	-0.271051	-0.147733	-0.294478	-0.0533925	-0.29858	0.11707	-0.29858	-0.252419	-0.29858	-0.29858	-0.29858	-0.29858	-0.264878	-0.0855468	-0.29858	-0.29858	5.74637	1.3724	-0.29858	-0.135857
MTHFR	-0.349125	-0.959609	1.05605	0.259939	0.0813978	-0.578462	-0.797984	0.211337	-0.669626	0.315552	0.831013	0.842966	-0.255089	4.04914	1.38866	0.422252	0.464778	0.667637	-0.807864	-0.33166	-0.626312	-0.935849	-0.617253	-1.07794	0.0318241	1.23276	-0.109853	-1.4559	-0.429297	-1.4868	-0.734987	-0.408862	-1.09347	0.377883	0.725347	0.510704	0.336828	-0.0801151
CLCN6	-0.654273	-0.589761	-0.835955	0.345167	-0.307484	-0.58515	-0.455359	-0.343739	-0.279854	-0.367873	-0.160476	0.488031	-0.321982	-0.313543	0.338616	-0.0717407	-0.0944768	-0.268221	0.589716	-0.0990133	-0.122868	-0.33346	3.74309	0.253076	-0.971374	0.836927	-0.266314	-1.19713	3.3387	0.197355	-0.793339	0.518595	-1.43796	-0.761806	0.976179	0.485718	-0.135476	-0.342529
KIAA2013	0.159646	-1.413	-0.15378	-1.53144	-0.608621	-0.709605	0.346291	0.0662804	0.0434923	1.43637	1.35262	0.57085	-0.747518	0.524275	1.40636	-0.801172	1.90653	0.143676	0.605467	-0.431844	1.35619	-0.315706	-2.05747	1.95851	1.07185	0.647936	0.0328551	-1.278	0.450174	0.574082	-0.653383	-1.27984	-0.867287	-0.89837	0.505058	-1.22595	-0.633945	0.448411
PLOD1	-0.460419	-0.663644	-0.114431	-0.384239	-0.639054	-0.279869	-0.600171	-0.488573	0.617452	0.0328484	0.431895	0.338026	-0.465475	-0.4559	0.405089	-0.465588	1.98193	0.140079	-0.524252	-0.143849	0.0273882	-0.308087	-0.802969	-0.258638	-0.0446167	0.172083	4.88623	-0.507937	-0.802969	-0.513165	-0.4799	-0.52366	-0.612104	0.923114	-0.376691	-0.29846	1.23548	0.0230492
MFN2	-0.178115	-0.728243	-0.947803	-1.10709	-0.578446	0.0032197	-0.483838	1.56649	1.79877	-0.480016	0.233966	0.759786	-0.125799	-0.437296	0.103259	-1.59345	0.449679	1.01368	-0.352812	0.195376	0.0728807	0.108773	-0.945995	2.74605	0.248757	1.08497	0.2837	-1.42318	-1.59345	1.63567	-0.561427	-1.59345	1.05906	-0.830913	1.03738	0.240412	-0.341578	-0.338961
MIIP	-0.118423	-0.226921	0.17429	-0.805192	1.38147	-0.793858	2.93689	-0.340796	-0.924526	-0.712221	-0.52337	0.393115	-0.545724	0.17935	-0.0478832	-0.485924	-0.0862974	0.197705	-0.582324	-0.551111	1.85485	0.306915	1.93805	-0.282314	0.407954	0.257486	-0.18444	-1.03728	2.95778	-1.34224	-0.832023	-0.267672	-0.941409	-0.132854	-0.30066	-0.587381	0.336302	-0.669305
RF00019-3	-0.168549	-0.168549	-0.168549	-0.168549	-0.168549	-0.168549	0.0674056	-0.168549	-0.168549	-0.168549	-0.168549	-0.168549	-0.168549	-0.168549	-0.168549	-0.168549	5.9978	-0.168549	-0.168549	-0.168549	-0.165983	-0.168549	-0.168549	-0.168549	-0.168549	-0.168549	-0.168549	-0.168549	-0.168549	-0.168549	-0.168549	-0.168549	-0.168549	-0.168549	-0.168549	-0.168549	-0.168549	-0.168549
TNFRSF8	-0.527091	-0.527091	-0.483864	-0.527091	-0.527091	-0.421073	-0.419804	-0.527091	-0.527091	-0.527091	-0.0936554	2.19963	-0.459142	-0.380044	3.75657	-0.527091	-0.527091	1.52187	-0.527091	1.27717	-0.448118	0.79455	1.70347	0.0551413	-0.527091	1.8747	-0.150968	-0.527091	-0.527091	-0.527091	-0.527091	-0.527091	-0.527091	-0.527091	-0.527091	-0.505611	-0.30525	0.499176
TNFRSF1B	0.839433	0.244621	-0.627164	-0.394206	-0.605566	-0.594122	-0.630243	-0.624453	-0.0178421	-0.413075	-0.0867075	2.90304	-0.598473	0.758408	0.398123	-0.665389	-0.315813	2.78951	-0.648508	0.373771	-0.387547	-0.593143	-0.529774	2.26973	0.656716	2.35639	-0.385688	-0.628473	0.0681118	-0.618468	-0.605997	-0.694638	-0.530223	-0.676386	-0.664227	-0.635722	-0.556808	0.0707986
VPS13D	-0.236503	-0.303355	-1.12734	-0.614035	-0.726414	1.66817	-0.379176	0.310812	-0.290165	0.182287	0.141855	0.00493915	3.69427	-1.1666	-0.292345	0.51946	-0.575642	-0.168418	-0.203015	0.149686	-0.971663	-1.2245	1.28617	-0.328466	-0.0569729	-0.180343	1.37918	-1.41874	-1.77518	-0.334199	0.167239	1.38846	0.0144523	0.612758	1.124	0.0439904	-0.732993	0.418326
DHRS3	-0.569355	-0.345024	1.31448	0.529212	-0.986625	2.08316	-0.823319	-0.554367	-0.890479	1.29059	0.588971	-0.945444	2.85435	-0.663069	0.365496	-0.773662	1.56891	-1.03214	0.265906	-0.196358	0.639158	-0.623297	0.494945	-1.12129	1.54225	-0.462996	-0.697758	-1.00988	-1.12129	-0.746159	0.792006	0.732938	-0.485469	-1.01439	0.347826	0.249421	-0.842943	0.245715
C1orf158	-0.169075	-0.169075	-0.169075	-0.169075	-0.169075	-0.166381	-0.169075	-0.169075	-0.169075	-0.141516	-0.14674	-0.169075	-0.151931	-0.169075	-0.169075	-0.169075	-0.169075	-0.169075	6.00082	-0.162105	-0.165501	-0.169075	-0.169075	-0.0420046	-0.169075	-0.169075	-0.169075	-0.169075	-0.169075	-0.169075	-0.148382	-0.169075	-0.169075	-0.169075	-0.169075	-0.162211	-0.169075	-0.14903
LRRC38	-0.162221	-0.162221	-0.162221	-0.162221	-0.162221	-0.162221	-0.162221	-0.162221	-0.162221	-0.162221	-0.162221	-0.162221	-0.162221	-0.162221	-0.162221	-0.162221	-0.162221	-0.162221	-0.162221	-0.162221	-0.162221	-0.162221	6.00219	-0.162221	-0.162221	-0.162221	-0.162221	-0.162221	-0.162221	-0.162221	-0.162221	-0.162221	-0.162221	-0.162221	-0.162221	-0.162221	-0.162221	-0.162221
PDPN	-0.366969	-0.401092	1.7753	0.414496	-0.418446	0.204599	-0.415844	-0.377736	-0.362778	-0.40419	-0.397167	-0.408741	-0.293622	-0.375372	-0.393991	2.98643	-0.0355828	-0.418446	-0.379196	-0.402394	-0.400386	3.89197	0.584402	-0.418446	-0.418446	-0.380953	-0.408069	-0.415251	-0.418446	-0.418446	-0.406123	-0.418446	-0.418446	-0.418446	2.11136	-0.359058	-0.418446	-0.399577
PRDM2	1.16193	0.51505	0.169955	0.253645	3.58519	-0.0219765	-0.337046	-0.166951	-1.37335	0.365264	0.745263	-0.25233	-0.155813	-0.761905	-0.45018	-1.30888	2.64678	-0.050071	0.40004	-0.440677	-0.743057	-0.943548	0.0803592	0.223676	1.25544	0.1349	0.364716	-1.14891	0.494123	0.326867	-0.644792	-0.937865	-0.776213	-1.46605	-0.185724	-0.749447	0.42411	-0.232516
KAZN	-0.687357	-0.738535	0.563421	0.630778	-0.30862	-0.190845	-0.377877	1.91735	0.0581392	-0.528308	0.174263	-0.748016	-0.679794	-0.747234	-0.0429568	-0.774599	0.432382	-0.731488	0.575181	-0.415045	-0.211649	0.274352	0.0132548	-0.283638	-0.596207	-0.753322	3.21268	-0.746574	-0.774599	3.15197	-0.337219	-0.617911	-0.407055	-0.606789	-0.0503675	-0.686996	1.87863	0.160589
TMEM51	-0.820769	-0.776258	0.266165	-0.105062	-0.725835	-0.424284	-0.647113	0.192288	-0.19755	2.42766	0.927608	-0.61281	-0.716841	2.45003	-0.194395	0.877604	1.19463	-0.50812	-0.376546	-0.835848	1.00099	-0.112857	-0.901174	-0.761019	-0.759002	0.493201	1.5533	-0.702173	-0.901174	2.0229	-0.421514	-0.137207	-0.901174	-0.75841	-0.671487	-0.703246	1.87676	-0.611274
FHAD1	-0.193738	-0.210636	-0.187391	-0.204723	-0.218367	-0.193432	-0.194555	-0.218367	-0.218367	-0.0360356	-0.189049	-0.202135	-0.172436	-0.138394	-0.218367	-0.218367	-0.218367	-0.163538	5.96495	-0.218367	0.0649137	-0.182522	-0.218367	-0.0924965	-0.153519	-0.164334	-0.188194	-0.197664	-0.218367	-0.0536989	-0.178311	0.403168	-0.218367	-0.218367	-0.209035	-0.206845	-0.130843	-0.187473
EFHD2	0.399715	-0.322566	-0.600606	-0.604993	-0.459184	-0.374142	-0.240015	-0.566967	-0.223588	-0.531377	-0.546187	1.64933	-0.518645	0.533935	-0.346055	-0.330529	-0.547536	1.30481	-0.118757	-0.192895	0.798937	-0.444143	-0.509158	3.86868	3.11314	0.83883	-0.375615	-0.564833	-0.126306	0.11081	-0.414533	-0.662782	-0.434268	-0.467146	-0.585242	-0.575803	-0.562591	-0.371739
CASP9	-0.786345	-0.428131	-0.832784	0.292493	-0.464698	0.0471146	1.29257	0.161456	1.09379	-0.163576	-0.423763	0.384013	-0.494371	2.07255	-1.29055	-1.44525	-1.44525	0.269177	0.888654	0.0378818	0.836406	-0.612366	-0.452621	0.959814	0.963696	-0.244259	0.261873	-1.07153	0.969247	-1.44525	-0.396153	-1.44525	1.84235	2.36906	-0.657962	-0.662954	0.768291	-0.747372
DNAJC16	-0.0292425	0.409137	-0.571286	-0.578032	-0.513304	0.532313	-0.673638	-1.09732	-0.729106	0.68974	1.24151	0.126525	0.721126	-0.614853	0.947494	0.346232	-1.72914	0.867854	3.48447	0.349443	-0.607935	0.644347	-0.661088	-0.929141	0.100161	0.0788155	0.963806	-1.15867	-1.72914	1.59693	0.145152	-0.433367	-0.190013	-1.72914	0.243958	-0.116078	0.103571	0.497907
AGMAT	1.10853	2.43293	-0.424415	-0.424415	0.105547	-0.200087	-0.00411386	-0.424415	-0.424415	-0.0733649	-0.321229	-0.400512	-0.315663	-0.349856	-0.424415	-0.424415	-0.424415	-0.121918	-0.000998885	-0.16383	-0.362188	-0.424415	-0.424415	0.157432	0.490651	-0.377581	-0.0713928	0.668389	-0.424415	-0.424415	-0.291205	-0.424415	5.03231	-0.424415	-0.424415	-0.302125	-0.424415	-0.273499
DDI2	-0.293365	-0.288142	-0.458924	0.272291	-0.149919	1.06784	-1.07737	-0.452091	-0.659458	2.34231	0.950907	-0.172114	1.63413	-0.92453	-0.341275	-1.75839	1.20712	0.142151	1.55937	-0.512371	0.255355	-0.878521	-0.927117	-1.51035	-0.801887	0.125656	-0.253191	-1.45724	1.78552	1.93727	0.506553	1.03724	-0.831549	-0.203377	-0.563057	-0.129284	0.10674	-0.286938
PLEKHM2	-0.165724	-0.86657	-0.186589	-0.417197	0.507008	-0.599596	-0.884089	0.399353	1.92903	0.357543	0.517614	0.926167	-0.679961	0.207299	0.16239	0.498638	-0.770109	1.03398	-0.85569	0.267907	1.9743	-0.0232553	-1.44135	-0.410235	-0.388419	2.9543	0.221895	-1.48829	0.335139	-0.450162	-1.12312	-1.57611	-1.68795	1.13374	0.477331	-0.429712	-0.0405016	0.580991
FBLIM1	-0.677599	-0.718543	-0.360012	1.24489	-0.424128	-0.246711	-0.666776	1.93834	0.103078	-0.640293	-0.488145	-0.719949	-0.367028	-0.694272	1.82064	0.494954	0.277979	-0.752657	-0.525416	-0.546185	-0.655716	-0.267164	0.845351	-0.673256	-0.457362	-0.660937	2.53592	-0.764105	-0.764105	0.0100825	-0.299744	-0.294583	-0.389188	2.49169	-0.378534	-0.694551	2.49737	-0.133339
UQCRHL	0.0973787	-0.315976	0.373833	-0.0686923	2.5635	0.698188	-0.0767323	0.273022	-0.91955	-1.05654	-0.76577	0.531592	0.0468121	-0.592382	-0.514185	-0.534035	-1.2679	0.655043	-0.36859	1.09565	-0.159591	-1.2679	-0.185998	0.591003	0.54619	0.178537	0.166027	-0.425742	-1.2679	3.62186	0.282091	-0.640682	1.11972	-1.2679	0.446485	-0.226504	-1.2679	-0.0964423
AL450998.2	0.541683	-0.166275	-1.14226	1.14454	0.700274	0.690522	-0.268974	0.598058	-0.845648	0.807706	1.08024	-0.138608	-0.33883	0.0471085	0.912916	-1.21576	2.14329	-0.415569	-0.162643	-0.721635	-0.844009	-1.43869	2.86512	0.694777	1.23324	-0.634963	0.897614	-0.876256	-1.43869	0.714241	-0.51639	-1.24816	-1.43869	-0.11918	0.04239	-0.670226	0.181448	-0.653711
SPEN	-0.188623	-0.375006	-0.731063	-0.415001	0.757193	0.126678	-0.476146	0.0465303	0.53879	2.05011	2.18908	0.198455	0.0796427	0.379467	1.49417	1.79287	0.147655	0.0286347	0.481839	-0.503386	-0.97509	-1.25428	-0.561075	0.47485	1.92603	0.213833	1.0975	-2.26495	-1.04239	-0.229899	-0.98214	-1.13192	-0.78621	-0.897249	-0.771834	-0.815584	-0.346244	0.724759
ZBTB17	-0.0213125	-0.0671949	0.299331	0.742731	1.20774	-0.413722	0.136892	-0.753516	-0.0223286	-0.109616	0.842775	-0.199901	-0.430446	0.123475	3.55562	1.20978	-1.59513	-0.81174	-0.586019	0.0269316	-0.172447	-0.337144	0.604279	-0.387641	0.148275	-0.425299	0.868899	-1.33157	-1.59513	1.89498	-0.719441	-1.59513	-0.403093	-0.422294	-0.410323	-0.653155	1.33354	0.468355
SRARP	-0.176337	-0.176337	-0.176337	-0.176337	-0.176337	-0.176337	-0.176337	-0.176337	-0.176337	0.0078643	-0.102135	-0.176337	-0.176337	-0.176337	0.00285105	-0.176337	-0.176337	-0.139369	-0.174662	-0.176337	-0.176337	-0.176337	-0.176337	-0.176337	-0.176337	-0.168955	-0.176337	-0.176337	-0.176337	5.99679	-0.144617	-0.176337	-0.176337	-0.176337	-0.176337	-0.174645	-0.176337	-0.165695
HSPB7	-0.343409	-0.343409	-0.33381	0.825497	-0.343409	-0.337474	-0.343409	4.89992	-0.343409	-0.343409	-0.343409	-0.343409	-0.321919	-0.343409	-0.343409	-0.343409	-0.343409	-0.343409	-0.323855	-0.343409	-0.342451	1.25028	-0.343409	-0.343409	-0.343409	-0.343409	-0.298336	-0.343409	-0.343409	-0.0159576	-0.324149	-0.343409	-0.343409	2.00516	-0.213527	-0.334529	1.76356	-0.343409
CLCNKA	-0.166918	-0.166918	-0.166918	-0.166918	-0.166918	-0.155874	-0.166918	-0.166918	-0.166918	-0.166918	-0.166918	-0.166918	-0.149415	-0.166918	-0.166918	-0.166918	-0.166918	-0.166918	-0.037899	-0.166918	-0.165721	-0.166918	-0.166918	-0.166918	-0.166918	-0.166918	-0.166918	-0.166918	-0.166918	6.00086	-0.15704	-0.166918	-0.166918	-0.166918	-0.166918	-0.160454	-0.166918	-0.166918
CLCNKB	-0.165237	-0.165237	-0.165237	-0.165237	-0.136821	-0.16258	-0.161414	-0.165237	-0.165237	-0.165237	-0.165237	-0.165237	-0.147367	-0.165237	-0.165237	-0.165237	-0.165237	-0.165237	-0.151354	-0.165237	-0.164527	-0.165237	-0.165237	-0.165237	-0.165237	-0.165237	-0.165237	-0.165237	-0.165237	6.00202	-0.155661	-0.165237	-0.165237	-0.165237	-0.133621	-0.162037	-0.165237	-0.165237
FAM131C	-0.165591	-0.165591	-0.165591	-0.161983	-0.165591	-0.157195	-0.165591	-0.165591	-0.143157	-0.165591	-0.156008	-0.165591	-0.160149	-0.165591	-0.165591	-0.165591	-0.165591	-0.165591	-0.157053	-0.165591	-0.165181	-0.165591	-0.165591	-0.165591	-0.165591	-0.165591	-0.165591	-0.14645	-0.165591	6.00203	-0.131479	-0.165591	-0.165591	-0.165591	-0.155412	-0.164614	-0.165591	-0.16358
EPHA2	-0.705919	-0.719094	-0.677721	-0.504391	-0.821079	1.41727	-0.80683	-0.738044	-0.26885	-0.202624	-0.0246852	-0.733437	1.90534	-0.630065	0.083746	0.883726	-0.215565	-0.74753	0.872828	0.423046	-0.771918	0.649551	-0.821079	-0.684274	-0.76826	-0.744853	-0.290797	-0.741094	3.27533	-0.821079	1.50724	2.16618	-0.526177	-0.487495	0.274437	0.951667	-0.516176	0.558668
ARHGEF19	0.322632	-0.257495	-1.00388	-0.0316997	-0.497658	2.48224	-0.420154	-0.504947	0.2813	-0.575084	-0.0749459	-0.579425	0.759155	-0.662537	0.0686089	-0.474591	2.83659	-0.195544	0.0956984	0.117785	-0.846905	-0.536058	-1.03067	-1.03067	0.012405	-0.569118	-0.812774	-0.702466	-1.03067	2.20904	0.565205	-0.562782	2.07906	1.66285	-0.474323	0.170958	-0.531471	-0.257646
CPLANE2	-0.0726857	0.076961	-0.65721	-0.65721	0.824606	-0.13472	0.993436	-0.237471	-0.65721	-0.0807793	-0.369808	-0.468967	-0.272808	-0.0778318	-0.22848	-0.65721	-0.65721	-0.65721	3.29408	-0.00342167	-0.390793	-0.65721	3.67165	-0.65721	-0.363732	-0.485734	0.600914	-0.65721	-0.65721	-0.65721	0.205584	1.74777	-0.65721	-0.65721	-0.0658917	0.115344	0.754648	-0.488142
FBXO42	-0.0712311	0.0200372	-0.400482	1.54599	-0.0410747	0.241311	-0.595647	0.135713	-1.63863	0.208189	-0.00692648	0.34487	0.239663	0.279166	-0.239241	-1.81013	3.37771	-0.162275	-0.287889	-0.966694	0.0760126	-0.0312141	2.11546	-1.31478	1.06043	0.556301	1.46168	-1.03688	-0.0809977	0.742251	-0.287916	-0.703021	-0.5942	-1.51425	-0.127759	-0.721419	0.259019	-0.0311524
SZRD1	0.807715	-0.726096	-0.714057	-0.835908	-1.2773	-0.46445	-0.995568	0.128683	1.51955	-0.0217438	0.143947	-0.057603	-0.449818	-0.384663	0.132341	2.95883	1.33822	-0.00698168	-0.870361	-0.267381	-0.326569	0.832121	1.13392	-0.0977464	-0.168774	0.404997	-0.192843	-2.56964	0.204096	1.44806	-1.03145	-0.542128	-0.917662	1.84315	-0.475441	-0.471442	0.262057	0.707943
NECAP2	0.494649	1.09941	0.0137222	-0.736521	0.592829	-0.691378	-0.0196596	-0.820913	1.98076	1.81294	0.547739	0.61383	-0.81723	0.949033	1.09807	0.174248	-0.961334	0.867745	-0.0771092	-0.388594	2.01095	-0.452954	-0.503712	-0.869534	0.83952	1.24518	-0.422506	-1.06547	1.21845	-1.0761	-0.98778	-1.52614	-1.02611	-1.5843	-0.567379	-1.04676	-0.738295	0.820729
CROCCP3	-0.185022	-0.339655	0.357363	0.444489	-0.861604	-0.281424	-0.113895	-0.861604	-0.634955	0.0687178	0.0306236	-0.603243	-0.128258	-0.596632	0.299498	1.00026	3.70054	-0.0826147	1.69368	-0.368057	-0.652314	-0.861604	-0.861604	-0.861604	0.742075	-0.609597	0.394475	-0.861604	1.69455	0.509691	-0.54028	-0.861604	-0.861604	-0.861604	0.16658	-0.72331	2.29985	0.211292
NBPF1	-0.670817	-0.71235	0.907202	0.729662	-0.0894317	1.69671	0.493311	-0.0752996	0.0492462	-0.222092	-0.186405	-0.325418	0.714103	-0.849363	-0.515513	0.280423	2.43448	-0.33491	1.53356	0.177107	0.862314	-0.969858	3.09437	-1.1563	0.192758	0.520877	-0.0702837	-0.938147	-1.42277	-0.837337	0.0700794	-0.992181	-1.10946	-1.42277	0.0681609	-0.661513	0.118654	-0.380795
CROCCP2	0.610737	0.207339	-0.276083	0.152044	-0.610687	0.247579	0.110491	0.245087	-0.980261	0.844381	0.617351	-0.297609	-0.0335235	-0.848009	-0.196395	0.718684	3.31713	0.0180075	3.1823	0.101924	-0.83037	-0.961701	-0.369273	-1.20065	0.808896	0.182874	1.27335	-0.818049	-0.733456	0.0158154	-0.612816	-0.939894	-1.03699	-1.33612	-0.162828	-0.704334	0.256248	0.0388174
CROCC	-0.0460399	0.420041	-0.201888	0.740665	0.850204	-0.0418043	0.27159	0.4235	-0.453461	-0.181811	-0.299198	-0.450099	0.0545139	-0.503152	-0.0926482	1.10742	-0.696448	-0.578769	5.27087	0.102238	-0.531687	-0.0173898	-0.696448	-0.603948	0.760446	-0.430736	-0.0240314	-0.667111	-0.696448	-0.18171	-0.449126	-0.696448	-0.449237	-0.566007	0.1089	-0.437664	0.354061	-0.47114
BX284668.5	-0.747653	-0.527058	-0.77607	-0.756805	-0.0347961	0.733035	0.656599	0.0690377	1.59105	1.66738	0.873017	0.823266	0.52427	0.314985	0.422581	0.224657	-1.51385	2.46982	0.837162	1.01786	0.0531575	-0.59035	0.168765	-0.922484	-1.08858	1.00597	-0.566793	-1.23632	-1.51385	-1.51385	-0.489497	-0.376643	-1.51385	-0.40857	0.332377	1.35012	-1.21188	0.653797
MFAP2	-0.450809	-0.450809	3.4591	3.42047	-0.450809	0.297075	-0.378527	-0.450809	-0.450809	-0.373918	-0.402802	-0.450809	-0.181185	-0.419536	-0.450809	1.84097	0.314661	-0.450809	-0.380975	-0.417293	-0.446881	-0.450809	2.19441	-0.450809	-0.302518	-0.450809	-0.160367	-0.450809	-0.450809	0.0521629	-0.273267	-0.450809	-0.450809	0.197427	-0.336988	-0.443372	-0.0832316	-0.413291
ATP13A2	-0.0423063	-0.0755825	-0.335857	-0.465852	-0.672748	-0.157815	-0.415609	-0.324714	0.70471	-0.0909221	-0.073063	0.00636889	-0.235139	-0.597567	-0.0305346	-0.256406	0.00211667	-0.0895706	-0.125015	-0.193947	-0.236381	-0.261775	0.0650311	-0.486786	-0.00885038	0.176321	-0.179633	-0.554387	5.76287	0.503291	-0.0304808	0.0176996	-0.254098	-0.380366	0.221991	-0.100823	-0.590378	-0.193796
SDHB	-0.50948	-0.880627	0.151819	-0.305687	-0.942865	0.00125148	-0.141153	1.52678	0.151345	0.628361	-0.363308	0.788536	-0.849871	-0.472399	-0.537538	0.994886	-0.954222	1.33154	-0.261719	-0.73129	1.01622	0.847566	0.205578	-1.65369	-1.33214	0.693234	0.637404	-1.83871	0.789572	2.96358	-0.619396	0.197085	-1.87046	1.139	-0.0731354	0.0240318	0.713917	-0.464007
PADI2	-0.396074	-0.369238	-0.396074	-0.364957	-0.396074	-0.386336	2.66698	-0.396074	-0.396074	-0.387013	-0.361652	-0.0776745	-0.391604	2.03596	-0.396074	-0.396074	-0.396074	-0.379352	-0.373619	-0.366429	0.0293208	-0.396074	-0.396074	3.03333	-0.396074	-0.25365	-0.396074	-0.396074	-0.396074	-0.396074	-0.186566	-0.396074	3.4373	-0.396074	-0.323342	-0.378969	0.52684	-0.396074
PADI4	-0.288227	-0.218242	-0.312419	-0.247414	-0.312419	-0.299055	0.63617	-0.312419	-0.294176	-0.312419	-0.312419	1.29729	-0.312419	-0.248434	-0.312419	-0.312419	-0.312419	-0.312419	-0.300614	-0.312419	-0.280868	-0.312419	-0.312419	5.28431	0.798878	-0.265439	-0.312419	-0.294926	1.84067	-0.312419	-0.27471	-0.312419	-0.312419	-0.312419	-0.312419	-0.306362	-0.312419	-0.290484
RCC2	0.80635	-0.451955	-1.03234	-0.987592	-0.300332	1.30245	0.196269	-0.856005	0.0489402	-0.628961	-0.129105	0.764038	1.0178	1.85944	-0.258466	-0.144164	-1.20767	1.67347	-0.652818	-0.718804	0.801838	-0.598513	0.0626917	-1.74772	2.26746	1.31077	-0.94924	-1.22118	1.39986	0.586792	0.727156	1.0956	-1.05544	-0.444628	-0.161277	-0.740597	-1.13293	-0.501203
ARHGEF10L	-0.585797	-0.565711	0.910628	0.0760887	-0.831376	-0.352943	-0.471098	0.655106	-0.831376	-0.616015	-0.735626	0.260915	-0.203705	-0.166567	-0.785089	-0.831376	0.0343821	0.745555	-0.351125	-0.803618	2.11525	-0.355857	0.386166	-0.831376	-0.831376	1.17254	-0.0255256	-0.670457	-0.831376	-0.831376	0.242595	1.4617	2.30749	-0.0590689	-0.304191	-0.389827	3.49103	-0.597593
ALDH4A1	-0.720609	-0.597991	0.186942	0.154271	-0.748625	0.22763	-0.463423	2.44944	-0.438138	-0.0261984	-0.416074	-0.0230042	0.0156592	0.0161673	-0.271493	1.10234	2.52082	-0.304338	-0.606309	-0.362076	-0.361287	-0.398779	-0.177545	-0.748625	-0.748625	-0.419403	-0.545859	-0.748625	3.71108	-0.748625	-0.0587193	-0.748625	-0.748625	-0.748625	1.00775	0.240694	0.951641	-0.404192
IFFO2	0.610596	0.639485	-0.332824	-0.369435	0.556251	0.43796	-0.0765085	0.517606	0.135061	-0.148351	-0.0155963	-0.367234	-0.0457625	-0.696814	0.0420617	-0.967108	-0.967108	-0.736176	2.16665	-0.786303	-0.79533	-0.779101	-0.967108	-0.967108	1.30847	-0.659721	0.282436	-0.591777	-0.967108	-0.967108	0.358058	2.83837	-0.543677	3.0974	-0.562899	0.846314	-0.229609	-0.296947
UBR4	0.0852493	-0.33978	-0.924091	0.0250086	-0.287549	-0.510341	0.00100978	-0.196609	0.285599	0.2223	0.484893	0.282143	-0.499336	-0.523173	0.31848	0.496223	0.701064	-0.168756	-0.132615	-0.85667	-0.560357	-0.269909	3.55501	1.24205	-0.326214	-0.124406	3.55853	-1.08427	-1.4163	0.0350555	-0.673867	-1.01884	-0.605351	-0.27548	-0.225783	-0.44639	0.485398	-0.311916
EMC1-AS1	-0.298699	-0.326398	0.453652	0.0599431	0.456545	-0.229948	0.065122	0.119538	-0.262935	0.0378388	-0.00362602	-0.209999	-0.200406	-0.389442	-0.109662	-0.434165	-0.434165	-0.315782	-0.132366	0.300143	-0.275626	-0.0541573	5.82357	0.0979728	-0.106007	-0.237743	-0.219751	-0.133656	-0.434165	-0.434165	-0.2385	-0.434165	-0.434165	-0.434165	0.123411	-0.263727	-0.434165	-0.055986
EMC1	-0.462234	-0.576632	1.87971	0.154565	-0.230579	0.241742	-0.733654	0.744965	-0.0158185	0.304716	-0.504995	-0.271639	-0.178792	-0.577291	-0.241361	1.01583	-0.32314	0.20526	-0.502853	-0.346382	-0.151419	-0.66195	-1.0923	-1.57327	0.223223	-0.202098	0.305997	-1.19889	1.13461	4.234	-0.434044	-1.12699	-0.81996	1.37724	0.123959	-0.228761	0.483791	0.0254407
MRTO4	-0.294902	-0.444868	0.207575	-0.1478	-0.0827368	0.32804	-0.540032	0.0254853	2.45829	-0.655804	-0.577567	-0.522857	-0.201928	-0.111502	-0.111136	-0.0584142	-0.442985	-0.505612	-0.196315	0.832126	-0.0624767	0.797514	0.332047	-1.15033	-0.290486	-0.288341	-0.286898	-0.683427	2.82696	-0.858602	-0.325009	-0.737531	-1.04105	3.74775	-0.441881	0.23154	-0.587125	-0.139712
AKR7A2	-0.25463	-0.440402	0.809926	0.582153	-0.171112	-0.345563	-0.10681	-0.122929	-0.30975	-0.501919	-0.379929	-0.33276	-0.428925	0.186099	-0.380989	0.739268	-0.502682	-0.267083	1.76521	-0.402508	0.1344	0.08377	-0.608397	-0.944011	0.0458636	-0.484381	-0.516227	-0.751055	5.0371	-0.182278	-0.212332	-0.836494	-0.78269	0.0728034	0.937305	-0.163907	0.480484	-0.444613
PQLC2	-0.589537	-0.525694	-0.12888	-0.0225423	0.577904	-0.245928	-0.947528	-0.166019	1.93381	-0.333129	-0.473885	0.183806	-0.558347	0.211532	-0.455541	-0.947442	-1.31075	0.392054	0.0988673	-0.580383	0.845783	2.32906	3.55124	-0.781614	0.0239363	0.407458	-0.389115	-0.982262	1.36796	-0.039315	-0.432243	-0.44331	-1.31075	-0.720031	1.0093	0.595946	-0.776945	-0.367473
CAPZB	1.20782	0.802288	0.298701	0.240475	-0.426214	-0.774863	-0.194677	0.549074	0.756514	-0.133346	-0.247329	1.89793	-1.15222	0.86247	-0.327628	-0.409131	-0.0118378	2.06204	-0.831182	-0.274044	-0.0969059	-1.20619	-1.18272	1.14363	0.819847	1.74735	1.11956	-1.96799	-0.169326	0.909212	-1.10593	-2.11738	-1.0556	0.0901043	-0.177163	-1.00658	0.492488	-0.131237
MICOS10	-0.211566	-0.257288	0.858946	-0.352369	-0.0305458	0.329339	0.556478	-0.0494395	0.731773	-0.875036	-1.12075	0.732664	-0.498992	0.416033	-0.66724	0.0922379	-0.917276	0.593882	1.61734	-0.589117	0.60989	0.0598706	-0.868217	-1.59799	-0.0895091	0.268976	-0.372326	-1.66263	-1.09993	1.11355	-0.353701	-1.07875	0.45948	3.95578	0.0996826	-0.12657	0.915431	-0.592115
NBL1	-0.343796	-0.322962	2.392	4.82843	-0.506262	-0.0678619	-0.453206	0.204981	0.310044	-0.482192	-0.425053	-0.496891	-0.490797	-0.504511	-0.431928	0.0926406	1.02795	-0.500066	-0.247094	0.000192076	-0.507932	0.151614	0.610654	-0.512864	-0.499715	-0.49383	0.481018	-0.507269	-0.512864	-0.331556	-0.352551	-0.512864	-0.512864	0.183013	-0.434162	-0.50169	0.966949	-0.296705
AL031727.1	0.230006	1.40463	0.823767	2.34011	-0.169209	0.870056	0.197818	-0.305378	-0.273656	-1.11423	-0.942565	0.50651	0.180776	0.174183	1.03812	0.389346	-1.88288	-0.221255	-0.0693562	0.0948013	-0.158695	0.845696	1.1317	-1.63522	-1.3855	0.427364	0.660079	-0.620715	-1.88288	-0.568649	-0.448901	-1.88288	1.54424	1.44974	0.0568735	-0.697135	0.349562	-0.456261
TMCO4	0.29493	0.243721	-0.736619	0.0323786	0.597174	0.679274	-0.158594	-0.598054	0.0352534	-0.759095	-0.895523	-0.716269	0.148801	0.137372	-0.182226	-1.1725	0.690748	-0.628003	0.773652	-0.468064	-0.181213	-0.606936	0.114682	-0.617772	-0.366081	-0.263789	-0.123007	-0.771559	-1.1725	4.50552	0.324646	0.51213	1.88808	-0.954767	1.19363	-0.064787	-0.0129384	-0.721676
OTUD3	0.215881	0.1428	-0.256883	0.167511	-0.136091	0.15189	-0.665573	-1.07411	-0.488701	-0.322399	0.233296	-0.674707	-0.213441	-0.900137	-0.216897	0.00655978	2.65662	-0.558264	0.0297131	-0.300045	-0.68129	-0.442641	-1.07411	-0.800508	1.5387	-0.413748	0.197597	-0.569726	-1.07411	3.0866	-0.289374	1.13574	-0.799181	-0.366009	2.69837	0.606966	-0.273746	-0.276562
PLA2G2A	-0.251277	-0.251277	3.57314	0.32952	-0.251277	-0.250218	-0.250649	-0.251277	-0.251277	-0.251277	-0.250777	-0.251277	-0.251277	-0.251277	-0.251277	-0.251277	-0.114603	-0.251277	-0.250975	-0.251277	-0.251076	4.68971	-0.189835	-0.251277	-0.251277	-0.251085	-0.251277	-0.251277	-0.251277	-0.251277	-0.250489	-0.251277	-0.251277	-0.251277	-0.251277	-0.250738	-0.251277	-0.251277
PLA2G5	-0.271509	-0.271509	5.20128	2.66285	-0.271509	-0.268479	-0.271509	-0.271509	-0.271509	-0.271509	-0.250911	-0.271509	-0.271509	-0.271509	0.243494	-0.271509	0.65461	-0.271509	-0.271509	-0.271509	-0.270254	-0.271509	-0.271509	-0.271509	-0.271509	-0.271509	-0.271509	-0.271509	-0.271509	-0.271509	-0.271509	-0.271509	-0.271509	-0.271509	-0.271509	-0.270923	0.0441752	-0.143594
UBXN10	-0.140684	-0.16384	-0.148691	-0.192949	-0.204576	-0.191336	0.166117	-0.190426	-0.204576	-0.146433	-0.126603	-0.183681	-0.197579	-0.204576	-0.162524	0.0460046	-0.204576	-0.204576	5.9862	-0.15372	-0.115363	-0.164035	-0.204576	-0.069112	-0.166837	-0.195603	-0.204576	-0.191322	-0.204576	-0.204576	-0.115881	-0.204576	-0.204576	-0.204576	-0.191391	-0.160568	-0.204576	-0.17025
CAMK2N1	-0.337331	-0.332761	0.407677	2.7598	-0.474392	-0.457207	-0.401105	1.99576	-0.458601	-0.449664	-0.444365	-0.46315	-0.463514	-0.462859	-0.474392	-0.244868	1.80101	-0.472068	-0.467377	-0.468439	-0.472118	-0.300828	-0.099771	-0.468555	-0.461783	-0.4606	2.93781	-0.462803	-0.474392	-0.344099	-0.448254	-0.297104	-0.450818	0.279787	-0.426704	-0.466425	2.76587	-0.441364
MUL1	-0.249073	-0.765605	-0.201811	0.617628	-0.87649	-0.279526	-0.391344	-0.2979	-0.813477	1.0023	0.344347	-0.396855	-0.406191	-0.76393	1.76772	0.0160628	2.55798	-0.257355	-0.0255442	0.139246	-0.373747	0.229751	0.317942	-0.629591	-1.01001	-0.351831	1.52906	-1.2058	-1.49254	1.97227	-0.832315	-1.32016	-1.30628	1.63906	1.4382	-0.542024	1.209	0.00884318
CDA	-0.305895	-0.279996	-0.250643	-0.29182	-0.317683	-0.300522	-0.291983	-0.317683	0.48445	-0.310356	-0.306235	1.11906	-0.304475	-0.282604	-0.241352	-0.0959569	-0.0951036	0.30825	-0.31498	0.310825	-0.213	-0.280854	-0.317683	5.69387	-0.279659	0.02205	-0.300597	-0.317683	-0.317683	0.62199	-0.30326	-0.317683	-0.317683	-0.317683	-0.310735	-0.306931	-0.308334	-0.0437467
PINK1	-0.951679	-1.12507	-0.410947	0.338855	-1.2569	-0.666612	0.186543	1.88781	2.00896	0.0634118	0.419533	-0.337269	-0.294438	-0.886507	0.136821	0.75583	-1.68551	-0.632379	0.0291495	0.443888	0.0880572	-0.721161	1.4373	1.5781	-0.81807	-0.201505	0.160717	-1.09365	-1.68551	2.47438	-0.426142	-1.28216	-0.00469354	0.883881	0.335024	-0.141701	0.669945	0.723713
DDOST	-0.178996	-0.0868607	1.66045	0.282576	-0.553208	0.0321853	0.251445	-0.473046	0.764679	-0.417116	-0.324669	-0.985811	-0.169816	0.248156	0.0451984	-0.113188	-0.346039	-0.463	-0.674435	0.0877843	-0.606	1.34252	-1.56378	-2.56539	0.424687	-0.983966	-0.0781273	1.42411	3.24916	1.8113	-0.353168	-0.145314	-1.0209	1.05328	-0.210091	-0.132978	-0.422859	0.191228
KIF17	-0.526853	-0.58201	-0.618645	-0.511375	-0.260732	-0.40263	-0.60569	-0.0296076	1.865	2.90903	2.72358	-0.60204	-0.506199	-0.116638	2.27859	0.0690675	-0.618645	-0.618645	0.213328	1.37656	-0.543081	-0.618645	-0.618645	-0.0583346	-0.396744	-0.370166	0.948766	-0.50657	-0.618645	-0.618645	-0.59662	-0.618645	-0.618645	-0.618645	-0.618645	-0.578255	0.336801	1.27792
HP1BP3	1.37484	0.865082	0.268275	0.994238	0.0972509	0.0137792	-0.387917	0.299993	-0.0401204	0.503488	0.512369	0.13779	-0.497341	-0.408051	-0.178817	0.762052	0.0243435	0.559817	-1.75186	-0.736137	-0.778818	-0.84339	-0.124648	-1.61983	2.8238	-0.0302194	0.861368	-1.55191	0.768804	1.94394	-1.19079	-1.17724	-1.77106	-0.574884	0.615187	-0.676654	0.997958	-0.0846818
EIF4G3	-0.260427	-0.736206	-0.31691	-0.314362	-0.335328	-0.634447	-0.912307	-0.518753	2.12883	-0.290102	0.489758	0.986021	-0.985302	-0.16251	-0.105224	0.133059	0.0741936	0.415337	1.67507	0.414918	-0.683576	-0.0468819	2.40861	-0.233675	2.6747	0.871443	-0.0383976	-1.65953	0.772115	0.408147	-0.627801	-1.21298	-1.70032	0.188015	-1.02848	-0.504892	-0.734902	0.4031
ECE1	-0.574139	-0.696856	-0.125801	-0.389921	-0.555611	0.127719	-0.773909	0.0519658	1.85992	0.467878	2.90876	-0.541459	-0.454712	-0.778594	3.0788	-0.119689	-0.256641	-0.612955	-0.638826	0.481913	-0.813231	-0.825828	-0.811958	1.21664	-0.704028	-0.677044	1.17333	-0.663063	-0.845098	1.1459	-0.0129821	-0.330729	-0.317612	-0.235866	-0.454671	-0.748795	0.049587	1.39761
ALPL	-0.266436	-0.261825	-0.232665	-0.297736	-0.321907	-0.206948	-0.297109	-0.321907	-0.133213	-0.27311	-0.263054	-0.295586	-0.0994349	-0.311177	-0.102609	-0.321907	0.059967	-0.278518	-0.213448	-0.252472	-0.311727	-0.321907	-0.254952	5.39828	-0.248685	-0.287069	-0.243395	-0.280401	-0.129328	-0.321907	0.00326697	-0.252475	-0.120868	-0.288692	0.381894	2.34897	-0.267617	-0.11229
RAP1GAP	-0.443237	-0.299721	-0.505116	-0.505116	-0.505116	-0.268633	-0.384483	-0.505116	-0.413978	-0.440975	-0.47914	-0.449311	1.45586	-0.40272	-0.404317	-0.505116	-0.505116	-0.505116	-0.0586971	-0.432913	-0.478154	-0.505116	-0.505116	-0.505116	-0.505116	-0.42013	-0.505116	-0.453328	-0.505116	1.29211	0.616663	2.45781	2.36343	0.0651008	1.34688	3.64253	-0.505116	-0.339031
[truncated: 15,931 more rows]

## Sheet: Skeletal muscle
Supplementary File 11C. The preferential expression of genes in cell types of skeletal muscle.
[truncated: 11,855 more rows]

[truncated: 3 more sheets: Spleen, Tongue, Trachea]
