# Supplementary material for: Affected cell types for hundreds of Mendelian diseases revealed by analysis of human and mouse single-cell data
Source: eLife. 2024 Jan 10;13:e84613. doi: 10.7554/eLife.84613 (PMC10830129; doi:10.7554/eLife.84613)
Supplement: Supplementary file 12. [file elife-84613-supp12.xlsx]

## Sheet: Supplementary File 12
Supplementary File 12. The preferential expression of genes in cell types of mouse tissues.
Data per tissue appear in distinct tabs, as follows: 12A Bone marrow, 12B Lung, 12C Skeletal muscle, 12D Spleen, 12E Tongue, and 12F Trachea.

## Sheet: Bone marrow
Supplementary File 12A. The preferential expression of genes in cell types of bone marrow.
Gene symbol	proerythroblast	reticulocyte	erythroblast	plasma cell	early pro-B cell	precursor B cell	immature B cell	basophil	myelocyte	hematopoietic stem cell	macrophage	T cell	mature B cell	monocyte	conventional dendritic cell	promyelocyte	neutrophilic myeloblast	neutrophilic metamyelocyte	band form neutrophil	segmented neutrophil of bone marrow
0610007C21Rik	-0.997615	-1.32528	-1.28032	2.45409	0.31286	-0.315699	-0.286051	0.427911	-0.196737	0.170654	1.9877	-0.129816	-0.109738	0.734291	0.585872	0.488676	0.379184	-0.926476	-0.9334	-1.04011
0610007L01Rik	-0.188806	-0.758706	-0.697046	3.95726	-0.417124	-0.34022	-0.153998	-0.0951506	0.918284	-0.130962	0.00715897	-0.305165	-0.246621	-0.336435	-0.0976244	-0.0218129	-0.216476	0.270844	-0.620159	-0.527246
0610007P08Rik	0.533501	-1.52046	-1.75695	0.391547	-0.709434	0.0577604	1.13384	1.07875	0.35256	0.868208	0.495257	1.16816	0.12674	-0.730866	1.72602	-0.149226	0.131796	-0.40382	-1.60393	-1.18947
0610007P14Rik	0.285373	-1.53257	-1.59236	-0.106542	-0.47718	0.406086	0.798851	0.821705	1.03763	0.649507	1.65104	-0.304715	-0.0963431	-0.666282	1.63624	0.38154	0.506753	-0.492005	-1.44769	-1.45903
0610007P22Rik	-0.587961	-1.60633	-1.76692	-0.122222	1.22595	0.6073	0.0159078	1.29116	0.616566	0.652354	1.04081	0.43291	1.85686	-0.444489	0.431526	-0.283763	-0.279962	-0.723972	-1.05118	-1.30453
0610009B22Rik	0.453689	-1.71153	-1.5182	1.21999	0.522234	0.904713	1.01286	-0.0654256	0.903422	1.53123	-0.192742	-1.01471	-1.50308	-0.179874	0.377243	0.702202	0.842098	-0.389558	-0.682762	-1.2118
0610009D07Rik	-0.29339	-1.94908	-1.67184	-0.640275	1.32228	1.3488	1.5815	0.22442	0.403189	0.51402	-0.152292	-0.515455	-0.386101	0.37255	0.257565	1.2605	0.851557	-0.438257	-0.919368	-1.17032
0610009O20Rik	1.57931	-0.933663	-1.17195	-0.95529	1.27485	0.775432	2.55681	-0.122	0.414293	0.635864	-0.281379	0.105239	-0.65006	-0.790976	0.272642	-0.217779	0.0441629	-0.238103	-1.01564	-1.28176
0610010F05Rik	-0.687832	-1.24307	-1.24307	0.00397815	-1.24307	0.52765	0.764409	0.888149	0.804271	1.78725	-0.399448	-0.749112	-0.211815	0.0428339	0.297334	2.10636	0.70242	0.121771	-1.02595	-1.24307
0610010K14Rik	0.0478472	-1.75014	-1.46924	-0.602478	1.42991	0.952719	1.08368	-0.00838305	0.0592202	0.417634	0.34151	-0.0462383	-0.406734	-0.52635	1.15544	0.719217	1.3971	0.242138	-1.32728	-1.70958
0610011F06Rik	-0.208081	-1.22037	-1.34912	1.92596	1.07458	0.217405	-0.139081	1.29451	0.728891	1.31624	-0.230556	1.44282	0.415744	-0.56726	-0.504651	-0.618683	-0.893356	-0.472599	-0.96227	-1.25011
0610012G03Rik	-0.616121	-1.63556	-1.59406	-0.340912	-0.753218	0.335069	-0.616677	0.923053	1.05234	1.09364	0.818228	-0.0875456	0.521773	1.14206	1.05092	1.48955	0.347974	-0.839625	-0.994364	-1.29652
0610030E20Rik	-0.888433	-1.59962	-1.84655	-1.25434	-1.00426	0.921749	1.9709	-0.133903	0.0815495	0.265041	0.309559	-0.429269	0.99983	-0.430572	0.116004	0.0654145	-0.0167539	1.40394	1.12028	0.34944
0610031J06Rik	-1.16695	-1.40157	-1.38678	2.23901	0.912937	-0.658171	-0.351321	1.76372	0.178528	-0.473555	1.07296	-0.095275	-0.125918	0.476612	0.053087	0.425018	0.808216	-0.652241	-0.862672	-0.755633
0610037L13Rik	-1.15222	-1.6134	-1.63026	-1.00822	2.50413	0.243951	-0.185304	-0.318101	1.47141	0.765692	-0.0208837	-0.331286	-0.0387617	-0.304861	-0.474051	0.329789	-0.336575	0.808996	0.786752	0.503197
0610037P05Rik	2.29985	-2.05315	-0.597174	-1.59524	1.08388	0.0487584	1.32117	0.682708	0.363127	0.188861	-0.20607	-0.883586	-0.435412	-0.586162	-0.137512	-0.685866	0.95596	0.329925	-0.334037	0.239963
0610039K10Rik	-0.677618	-0.142802	-0.488774	-0.781406	-0.781406	1.29648	3.52745	-0.781406	-0.285295	-0.100111	-0.594335	0.0842516	-0.310344	0.189135	0.0555246	-0.0725107	0.989985	-0.636351	-0.583257	0.0927867
0610040J01Rik	-0.543375	-0.603088	-0.603088	-0.603088	-0.603088	-0.603088	-0.603088	-0.395777	0.843514	-0.435869	-0.603088	-0.603088	-0.603088	2.80136	1.39196	1.91616	0.75418	-0.459916	-0.358633	-0.0858144
0910001L09Rik	-1.23076	-1.11737	-1.31141	-0.796792	-0.401198	-0.835284	-1.05416	0.555387	0.618238	-0.43652	0.201284	-0.717027	-0.83916	1.10783	-0.0200337	0.768381	1.43123	1.5735	1.63598	0.867878
1100001G20Rik	-0.453986	-0.293875	-0.438182	-0.446469	-0.461265	-0.447804	-0.456655	-0.459637	-0.0899359	-0.437008	-0.413941	-0.430699	-0.176361	-0.338991	-0.452096	-0.45967	-0.450004	1.84238	3.11708	1.74712
1110001A16Rik	-0.503512	-1.66308	-1.99015	1.09726	1.40271	-0.0900052	-0.651433	-1.06217	0.521499	0.876135	0.766374	0.812184	0.206857	0.480472	-0.291213	1.10179	1.28203	-0.870213	-0.635911	-0.789626
1110001J03Rik	-0.314925	-1.48965	-1.17294	-0.602922	-0.651089	0.0421021	0.39469	1.48973	2.3948	1.35808	-0.394501	-0.0186448	-0.190924	-0.305296	0.280408	1.10297	0.634969	-0.435077	-0.79823	-1.32356
1110002B05Rik	-1.26771	-1.40225	-1.43179	-0.9402	-0.881857	0.143064	0.819882	1.04663	1.02795	0.862648	0.706462	0.438642	-0.521332	-0.147058	1.02277	1.1702	1.21098	0.553001	-1.04814	-1.36189
1110002N22Rik	-0.483218	-0.899189	-0.899189	-0.899189	3.02041	0.709284	0.573303	-0.760074	0.465807	0.627311	0.673819	1.55055	-0.0167801	-0.0891342	-0.486371	-0.405934	-0.626967	-0.402523	-0.752725	-0.899189
1110003E01Rik	-1.25294	-1.17778	-1.25638	-0.47808	2.32276	0.395625	0.690669	-0.134587	-0.465729	0.0863085	2.2476	-0.704274	0.895605	-0.32993	0.160422	-0.596987	-0.69326	-0.196869	0.736647	-0.248815
1110004E09Rik	0.0805141	-1.30568	-1.0614	2.29291	-0.0938988	1.50161	0.531607	-0.66546	1.3842	1.10186	0.23723	0.373988	-0.0822067	-0.625231	-0.0509474	0.131065	-0.258823	-0.998049	-1.26412	-1.22916
1110004F10Rik	0.652476	-1.72572	-1.21721	0.795621	1.2162	1.55622	1.79977	-0.186035	0.501647	0.525866	0.0477085	-0.187181	-0.105479	-0.230779	0.226721	0.538685	-0.269706	-1.07942	-1.49814	-1.36125
1110005A03Rik	-0.607213	-1.43085	-1.44924	0.143502	0.908138	0.665116	0.313386	-0.329042	-0.643472	-0.224896	1.28851	1.31136	2.21029	0.38491	1.02032	-0.547599	-0.222555	-0.643108	-1.04726	-1.10028
1110007C09Rik	-1.10241	-0.953226	-1.13008	-0.975931	-0.644524	-0.951554	-0.844233	0.132122	-0.393574	0.0250207	-0.385305	-0.580085	-0.0852591	1.34934	0.167955	1.12598	1.4684	0.532814	0.871511	2.37305
1110008F13Rik	-0.698993	-1.59192	-1.585	-0.276466	-0.752711	-0.160799	-0.623538	0.00871739	1.24537	0.45323	-0.821862	-0.977692	-0.775972	0.922974	-0.16427	1.49287	1.42955	0.559017	0.792459	1.52505
1110008L16Rik	-0.354808	-0.653593	-0.540751	-0.0501682	0.241651	1.90011	3.42433	-0.280433	0.202874	0.64408	-0.2603	-0.4906	-0.508494	-0.399333	-0.322799	-0.300047	-0.412722	-0.563432	-0.621968	-0.653593
1110008P14Rik	-0.648518	-1.0392	-1.24685	2.71954	-0.672325	-0.574247	-0.735265	0.00639378	-0.44155	-0.857891	0.707553	-0.243425	0.0701905	-0.0658895	-0.54724	-0.242167	-0.157386	1.46876	1.42649	1.07304
1110012L19Rik	-1.10267	-2.10432	-1.35585	1.86719	1.1967	1.11747	-0.258033	-0.505741	0.43558	-0.179073	1.16368	0.537999	0.0748183	0.425053	-0.216656	-0.132589	-0.124559	-1.14169	-0.728159	1.03085
1110014N23Rik	-1.0399	-1.21271	-1.50836	0.97893	0.138152	-0.523487	0.86611	-0.21355	0.0581901	0.0193569	0.92868	-0.660696	-0.251071	1.04908	1.26123	0.645017	2.24342	-0.766824	-0.941206	-1.07038
1110017F19Rik	0.0559602	-0.656059	-0.744281	-0.744281	-0.744281	-0.162079	-0.443954	-0.317632	0.434126	0.673475	2.142	-0.744281	-0.744281	-0.625465	0.0675323	-0.53722	-0.230496	2.61869	1.44681	-0.744281
1110018G07Rik	0.5422	-0.260725	3.24105	-0.0627092	1.03361	0.887976	0.367154	-1.50618	-0.251291	-0.72077	0.209812	-1.0579	0.0402895	-0.119686	0.557934	-0.515405	-0.537642	-0.875332	-0.449165	-0.523226
1110018J18Rik	-0.617629	-0.923249	-0.577237	0.399986	-0.564626	0.181373	-0.331654	-0.986699	-0.303899	0.564915	3.58999	-0.251815	-0.50317	0.495035	0.605045	0.029943	0.803641	-0.729868	-0.587891	-0.292191
1110020A21Rik	2.27837	-0.704063	1.84454	-0.704063	-0.704063	0.552645	2.45515	0.104192	-0.312878	-0.291478	-0.160235	-0.204529	-0.410928	-0.504642	-0.704063	-0.311565	-0.391944	-0.451067	-0.675325	-0.704063
1110020G09Rik	1.46355	1.4191	3.3405	-0.670416	-0.651263	-0.066321	-0.217231	0.0558735	0.161948	0.19755	-0.62702	-0.618678	-0.667668	-0.492448	-0.476153	-0.260975	-0.418662	-0.338059	-0.549961	-0.583658
1110021J02Rik	-0.237218	-1.34211	-1.37284	2.33629	0.235196	0.30528	1.58515	-0.41027	1.07668	-0.000188448	0.112898	-1.09284	-0.577379	-0.718643	0.307374	0.649629	0.187427	0.364862	0.314193	-1.7235
1110028C15Rik	-0.471956	-0.539804	-0.500019	-0.568152	3.7152	0.751368	1.31782	-0.428493	-0.368824	-0.0571187	-0.0656748	-0.521281	-0.270046	-0.305578	0.390156	-0.442084	-0.306532	-0.386062	-0.537176	-0.40575
1110028F11Rik	-0.175654	-0.241947	-0.241947	-0.241947	-0.241947	-0.2359	-0.221853	4.24608	-0.234902	-0.111878	-0.241947	-0.164754	-0.241947	-0.224204	-0.241947	-0.232636	-0.241947	-0.238376	-0.228399	-0.241947
1110031I02Rik	-0.100505	-0.726286	-0.726286	3.97939	-0.232417	0.00302521	-0.126121	-0.223406	0.112504	0.323168	0.135853	-0.423434	0.528109	-0.503303	-0.111869	-0.122066	-0.028507	-0.366244	-0.665315	-0.726286
1110032A03Rik	0.904388	-0.413264	3.2704	-0.796946	-0.384714	-0.0488734	0.177294	-0.19668	-0.163476	0.0126951	1.82576	-0.33758	-0.931165	-0.434694	0.239764	-0.371245	-0.134357	-0.56511	-0.699024	-0.953173
1110034A24Rik	2.49736	-1.02826	-0.910114	-0.690073	0.354076	1.8935	1.48666	-0.94819	0.165772	0.46091	-0.266132	-0.276813	-0.61076	-0.655616	0.417775	0.425078	-0.114668	-0.213013	-0.95923	-1.02826
1110034B05Rik	-0.29293	-1.5452	-1.13115	0.129071	1.50649	0.32877	2.74293	0.91323	-0.157396	-0.244058	0.94131	-0.144736	-0.582795	-0.182532	0.593855	-0.408321	0.201544	-0.545171	-0.960767	-1.16213
1110034G24Rik	-0.227027	1.21714	3.14223	0.320946	-0.750412	-0.713721	-0.868706	1.00089	-0.558024	-0.614759	-0.246275	1.01938	-0.183533	0.801072	-0.867542	-0.52585	-0.422511	-0.884863	-0.354445	-0.283995
1110037F02Rik	-0.314833	-1.63278	-1.37588	-0.621804	1.85774	0.937389	1.85098	-0.215658	-0.521447	-0.0406072	0.232854	1.76141	0.2418	-0.122587	0.265186	-0.310187	0.517544	-0.568516	-0.905988	-1.03461
1110038B12Rik	0.279418	-0.952285	-1.00734	-0.793385	1.75426	1.99334	0.265436	-0.320587	1.14258	2.09603	-0.711821	-0.0485937	-0.411982	-0.28058	-0.110023	0.0678864	-0.153422	-0.821748	-0.977793	-1.0094
1110038D17Rik	1.92375	-0.315552	3.47392	-0.231659	-0.360684	-0.388366	-0.395967	-0.4197	-0.526014	-0.553238	-0.514388	-0.312608	0.78541	-0.289622	-0.352476	-0.423052	-0.204603	-0.483813	-0.483515	0.0721781
1110038F14Rik	-0.651741	-1.54238	-1.56469	-0.0133543	2.8796	0.765754	0.907901	-0.0226195	0.288907	0.484662	0.531705	-0.117624	-0.170926	0.55965	0.288844	-0.0866863	0.248954	-0.503135	-0.947084	-1.33574
1110049F12Rik	2.58434	0.470136	2.87676	-0.159257	0.495589	-0.224086	-0.208275	-0.0689655	-0.326979	-0.182469	-0.611897	-0.180212	-0.392472	-0.637265	-0.167897	-0.400392	-0.451324	-0.727248	-0.812522	-0.875559
1110054M08Rik	-0.891524	-0.75899	-0.950995	-0.688254	1.28448	0.184298	0.083896	-0.950995	-0.877423	1.08285	1.43006	2.55133	1.09081	-0.379005	0.288417	-0.211213	-0.78377	-0.663716	-0.0394321	-0.800817
1110054O05Rik	-0.580058	-1.32977	-1.41058	0.367748	1.523	2.32175	0.806209	-1.11048	0.344047	0.493406	0.110027	-0.517699	0.0949409	-0.372378	1.0085	0.562268	0.390024	-0.35058	-1.26758	-1.0828
1110057K04Rik	-0.673517	-1.73781	-1.90903	-0.630072	0.788776	0.561565	0.555046	1.6106	0.238153	0.806081	0.772354	0.628588	-0.0915657	0.945755	1.16345	0.54703	-0.517078	-0.99821	-1.08347	-0.976651
1110058L19Rik	0.775533	-1.34932	-0.70361	1.23939	2.05068	0.708853	0.354344	-0.536279	0.583329	1.12844	0.71321	0.647994	-0.333977	-0.143813	-0.286277	-0.25461	-0.193039	-1.28398	-1.38339	-1.73348
1110059E24Rik	-1.31744	-1.29655	-1.46617	1.42245	-0.0577792	1.14639	1.16222	-0.415082	-0.109984	0.42524	0.45392	-0.54735	2.30678	-0.375345	0.709647	0.135268	0.133329	-0.523081	-0.894059	-0.892399
1110059G10Rik	0.485069	-1.6961	-0.890903	-0.885003	-0.0999124	1.30967	1.53198	0.0547975	-0.102381	0.203404	0.57574	-1.13287	-0.820013	0.302724	1.60105	1.19846	1.10076	-0.657077	-1.03919	-1.0402
1110065P20Rik	-0.723578	-1.47626	-1.39427	-1.29652	-0.331317	1.19222	0.532992	-0.821176	0.0401963	1.99698	1.05586	0.680256	0.646497	0.0992411	1.10313	0.73693	0.0511806	-0.806554	-1.33133	0.0455167
1110067D22Rik	-0.154626	-0.513213	-0.513213	0.604265	-0.513213	-0.299098	-0.251967	3.76717	-0.0423839	1.41527	-0.231483	0.000317382	-0.289618	-0.478299	-0.513213	-0.321769	-0.447181	-0.467994	-0.513213	-0.236538
1190002F15Rik	2.17039	-0.644269	2.17554	-0.62578	-0.583758	0.745409	1.91481	0.298073	-0.222444	-0.437345	-0.792866	-0.717793	-0.763163	-0.831268	0.101446	-0.297694	0.0572855	0.0842913	-0.795265	-0.835596
1190002H23Rik	1.4638	-0.547996	0.110666	1.59226	-0.331577	-0.377706	-0.390256	-0.533572	3.26112	-0.413883	-0.542927	-0.404043	-0.605633	-0.537352	-0.529608	-0.464726	-0.522423	0.545996	-0.254712	-0.517428
1190002N15Rik	1.0798	-1.04063	-1.04063	-1.04063	-1.04063	0.315815	1.01678	-1.04063	-0.374536	1.65998	1.37264	1.31779	-1.04063	0.367185	1.34068	0.0333426	0.299052	-0.508896	-0.852982	-0.822891
1190005F20Rik	-0.419407	-1.16196	-1.0662	-0.107874	2.1413	0.536533	0.461533	3.0607	-0.184751	0.490668	-0.240153	-0.225644	-0.146306	-0.295975	-0.420205	-0.534835	-0.36924	-0.546767	-0.554174	-0.417242
1190007F08Rik	4.16032	-0.274386	0.601278	-0.289312	-0.289312	-0.289312	-0.289312	-0.289312	-0.267149	-0.0107587	-0.289312	-0.252991	-0.289312	-0.277864	-0.27144	-0.272876	-0.289312	-0.273172	-0.289312	-0.25715
1190007I07Rik	-0.467709	-1.22338	-1.40179	0.602686	-0.480991	1.59942	0.337498	-0.0733183	1.53854	2.20773	0.174072	0.744444	0.413727	-0.662638	0.151434	0.164863	-0.539799	-0.830251	-1.2676	-0.986938
1200011I18Rik	-0.219975	-1.24888	-1.81207	-0.91702	0.851099	0.686675	1.0589	0.21015	-0.493766	1.22114	1.18231	-0.411405	-0.56827	1.3129	0.676657	0.516919	1.12915	-0.784486	-0.98789	-1.40213
1200014J11Rik	-0.00958296	-1.46442	-1.38028	-0.913083	-0.336745	1.22696	3.1881	0.513388	0.101486	0.446826	-0.216562	0.0653628	0.343649	-0.367354	-0.052307	0.268116	0.450858	-0.365016	-0.647953	-0.851438
1200016B10Rik	1.33713	1.02223	3.28652	-0.402099	-0.34369	-0.476561	0.705023	0.491899	-0.640945	-0.157388	-0.0731441	-0.220127	0.296329	-0.655567	-0.364394	-0.504829	-0.800578	-0.806597	-0.859532	-0.833684
1300001I01Rik	0.674824	-1.31448	-1.00356	0.425212	0.38464	2.28394	-0.84308	-0.425795	1.14459	1.03072	0.0690339	-0.030383	0.601551	0.0240735	-0.439389	1.42793	-0.490056	-1.10022	-1.10508	-1.31448
1300002E11Rik	1.07889	-0.890491	0.0882692	1.52399	1.44984	1.33692	0.821172	-0.541981	-0.839677	-0.379148	0.764402	1.42411	0.608572	-0.834234	-0.689101	-0.91111	-0.999053	-1.0057	-1.03307	-0.972603
1300014I06Rik	-0.378098	-0.197794	-0.378098	-0.0615377	-0.378098	-0.304458	-0.0798617	-0.0572253	-0.352549	-0.378098	0.0606807	1.0176	4.02439	-0.318493	-0.378098	-0.327868	-0.378098	-0.378098	-0.378098	-0.378098
1300017J02Rik	1.38522	0.173176	3.91043	-0.32563	-0.32563	-0.314738	-0.32563	-0.32563	-0.319091	-0.311077	-0.32563	-0.32563	-0.32563	-0.322155	-0.312912	-0.32563	-0.315384	-0.317158	-0.32563	-0.32563
1300018I17Rik	-0.786162	-1.24139	-1.56708	-0.884298	2.48332	-0.60031	-0.172559	-0.188382	-0.227557	0.564181	-0.819978	-0.850975	0.13095	1.90251	0.884226	0.600692	0.266287	0.0249177	0.613076	-0.131466
1300018J18Rik	-0.429618	-0.667979	-0.745618	0.222493	-0.532336	-0.599626	-0.306557	-0.647051	0.142726	-0.0776164	-0.0164135	-0.206487	-0.00558995	-0.132572	-0.506596	-0.407827	-0.302532	2.08355	3.40487	-0.269219
1500001M20Rik	0.506019	-1.24774	-1.24774	-0.969289	-0.3572	1.80721	-0.252182	0.0631727	1.54248	1.77916	-0.261155	-0.383571	-0.189084	-0.191282	0.559726	1.03593	0.869635	-0.753081	-1.06325	-1.24774
1500002O20Rik	0.000903475	-1.56161	-1.75908	-0.942392	-0.0107941	-0.75018	0.267172	1.44092	-0.410916	-0.0411525	-0.268347	-0.0418317	0.839172	-0.367827	0.170408	-0.354803	0.259084	1.26619	2.61476	-0.349673
1500003O03Rik	-0.0482735	0.576976	1.60553	-0.78243	0.360248	-0.57775	-0.472051	-0.632621	-0.806456	-0.180397	-0.713656	-0.937275	-1.10528	0.568588	-0.818963	-0.299121	0.103147	-0.105509	1.46395	2.80134
1500010J02Rik	0.953667	-1.34873	-0.753823	-1.125	-0.0353008	-0.0405245	1.95097	-0.607879	-0.0408738	1.25447	-1.07481	-1.08506	0.227439	0.550514	0.622977	0.818944	1.59464	0.282461	-1.16192	-0.982162
1500011B03Rik	-0.754245	-1.28493	-1.50586	-0.142841	0.0630887	-0.0105956	-0.255974	1.13932	-0.29535	1.63954	1.57005	0.623758	1.25614	0.626863	0.754591	0.588759	-0.617113	-1.39024	-1.37961	-0.625361
1500011H22Rik	0.401508	-0.701263	-0.871454	-0.45592	2.53568	1.55472	1.88294	0.616749	0.364572	0.475787	-0.691384	-0.69438	-0.297203	-0.840818	0.100779	-0.653506	-0.353333	-0.610148	-0.840774	-0.92254
1500011K16Rik	-0.369389	-0.974031	-1.07778	-0.41841	0.662723	0.20117	-0.937077	-0.0896223	2.41396	1.4538	1.35285	0.846503	-0.0141503	0.105492	-0.284901	0.911049	-0.628557	-0.805109	-1.14932	-1.1992
1500012F01Rik	-0.441953	-1.13831	-0.981415	-0.852877	1.8766	0.428537	-0.247607	-0.517179	-0.258444	2.3097	0.273443	0.268745	1.28329	0.726674	0.859534	-0.225538	-0.265659	-0.993127	-1.0562	-1.04823
1500031L02Rik	-0.706672	-0.512528	-0.870607	-0.734347	-0.291779	-0.265842	-0.635659	-0.0215004	0.304876	0.24074	-0.412211	-0.158831	-0.256094	-0.463298	-0.302808	-0.65713	-0.768221	1.84913	2.74994	1.91284
1500032L24Rik	0.0632731	-1.44395	-0.792065	-1.10862	-0.00382947	0.543685	0.808805	-0.225502	0.188723	-0.261348	1.05221	-1.08456	-0.900648	0.595016	1.2802	1.81974	1.82515	-0.313533	-0.88875	-1.154
1600002H07Rik	1.56144	-1.10182	-1.10182	-0.418895	-1.10182	0.181648	2.93342	-0.225268	0.501543	0.97791	-0.116911	-0.139436	-0.299559	-0.493395	-0.0608503	0.391586	0.319632	0.263429	-0.968991	-1.10182
1600002K03Rik	-0.793842	-1.14532	-1.48617	0.949668	0.868302	-0.39867	-0.401894	1.84566	0.216056	0.154238	1.0236	-0.305673	0.33682	1.19303	-0.0901037	1.03509	0.822636	-1.04964	-1.30556	-1.46822
1600010M07Rik	-0.497474	-0.257014	-0.450701	-0.436792	-0.559398	-0.579504	-0.560988	-0.462134	-0.529037	-0.513802	-0.320029	-0.579684	0.106071	1.21524	0.193142	0.0811934	0.338805	-0.393017	0.445691	3.75943
1600012F09Rik	-0.520661	-1.08185	-0.98341	2.24256	1.76249	0.629563	0.375293	-0.336431	-0.691726	0.976079	0.877859	-0.0991482	0.340145	-0.419833	1.14649	-0.360557	-0.643005	-1.09155	-1.07699	-1.04531
1600012H06Rik	-1.31846	-1.85524	-1.9378	-0.532362	2.01296	-0.331354	0.167371	0.939798	-0.190895	-0.738136	0.658235	-0.114917	-0.497782	1.28385	0.725764	0.744859	-0.153526	0.389881	0.0219391	0.725808
1600014C10Rik	-1.31051	-1.27789	-1.04574	-1.10106	1.83473	-0.952822	-1.19358	0.348356	0.361616	-0.361067	-0.10866	-0.195551	-0.527473	1.56946	-0.292019	0.298285	0.715994	1.11411	1.44106	0.68276
1600020E01Rik	0.466587	2.22574	3.39006	-0.463276	-0.157226	-0.40063	-0.287932	-0.283553	-0.366718	-0.315977	-0.209071	-0.393419	-0.272851	-0.353696	-0.307711	-0.439799	-0.36421	-0.445104	-0.505405	-0.515807
1700007L15Rik	-0.46375	-0.602766	-0.837549	3.46114	1.34931	-0.119949	0.0247312	-0.659222	0.402967	-0.260598	0.948619	0.0250424	0.43449	-0.591015	-0.39242	-0.300663	-0.357424	-0.63561	-0.781902	-0.643434
1700008J07Rik	-1.05288	-1.11081	-1.03984	0.163276	1.16799	2.03994	1.6878	0.119914	0.312791	0.392186	-0.281261	0.0467629	1.57728	-0.558202	0.45024	-0.182223	-0.587148	-0.733634	-1.18995	-1.22224
1700011J10Rik	1.52265	-1.99658	0.768081	0.466388	0.769003	0.310687	0.0467773	0.844351	-1.03259	-0.601688	-0.985091	-0.506313	0.48504	-0.196815	-1.30262	-1.01469	0.105539	-0.4697	0.797008	1.99055
1700012B15Rik	0.225333	-1.7144	-0.717564	2.32738	0.936285	0.338538	0.552074	0.199174	-0.44286	0.399694	1.41596	-0.441247	0.675406	0.171538	0.127602	0.220596	-0.193017	-1.19033	-1.50019	-1.38996
1700017B05Rik	0.0186995	-0.617051	-0.230565	4.01158	-0.150851	0.0982287	0.135562	0.279333	-0.225453	0.299992	0.458222	-0.510335	-0.422566	-0.4454	-0.229413	-0.312946	-0.59015	-0.37449	-0.541437	-0.650959
1700020I14Rik	1.46178	2.0586	2.87293	-0.18488	0.101418	-0.36584	0.421459	0.274334	-0.821411	-0.548082	-0.468397	-0.300033	-0.566983	-0.547558	-0.302109	-0.756211	-0.493387	-0.668262	-0.576152	-0.591219
1700020L24Rik	-0.62331	-0.494465	-0.447013	-0.566711	-0.377841	-0.563299	-0.577044	0.989432	2.12976	-0.464749	-0.505295	-0.506493	-0.588228	-0.467001	-0.484594	0.305244	0.269335	3.086	0.340501	-0.454221
1700021F05Rik	0.105207	-1.23501	-1.63011	0.323514	-0.633126	1.3503	0.437959	-0.139122	0.652666	0.480448	0.290758	-0.555042	-0.373807	0.274321	0.544688	0.85628	2.44206	-0.432894	-1.46546	-1.29363
1700021K19Rik	-0.47484	-0.88046	-0.737478	-0.589872	-0.388405	-0.00359057	0.43595	-0.88046	-0.501072	0.32111	2.03839	-0.581482	2.82563	0.258552	1.19052	0.259674	-0.140301	-0.686019	-0.58539	-0.88046
1700024P16Rik	-0.2741	-0.321999	-0.321999	-0.321999	-0.321999	-0.321999	-0.321999	-0.321999	-0.321999	0.343558	3.99589	-0.321999	-0.321999	-0.321999	1.08664	-0.321999	-0.321999	-0.321999	-0.321999	-0.321999
1700025G04Rik	-0.768632	-0.704679	-0.668418	-0.626797	-0.652554	-0.319171	-0.435947	-0.665521	-0.31936	0.867571	-0.404733	2.31628	-0.711155	0.526526	2.23231	0.996697	1.22709	-0.411542	-0.709338	-0.768632
1700026L06Rik	-0.698501	-0.708105	-0.708105	-0.162724	-0.708105	-0.665874	-0.527713	-0.32927	-0.500449	-0.385586	0.772299	-0.303623	0.298462	0.082248	1.7917	1.40988	2.97025	-0.350368	-0.568312	-0.708105
1700027J07Rik	-0.313571	-0.313571	-0.313571	-0.313571	4.0609	0.760139	0.50967	-0.313571	-0.313571	-0.313571	-0.313571	-0.313571	-0.313571	-0.313571	-0.313571	-0.313571	-0.313571	-0.313571	-0.313571	-0.313571
1700029F09Rik	0.0925628	-0.908402	-1.00507	0.593971	0.302223	1.80179	3.13498	0.260294	0.369	0.150392	-0.594081	-0.644945	-0.44761	-0.762401	-0.182031	-0.211608	0.113367	-0.212113	-0.845256	-1.00507
1700030K09Rik	-0.424938	-0.4738	-0.4738	-0.214653	3.88078	1.34698	-0.0997307	-0.4738	-0.212906	0.193506	-0.220962	-0.349527	0.0043835	-0.302341	-0.149997	-0.297716	-0.427814	-0.356067	-0.4738	-0.4738
1700034H14Rik	-0.249356	-0.916024	-1.05982	0.0391281	3.00688	0.972909	0.661954	-0.0572902	0.952301	0.73718	-0.537031	-0.33028	0.279516	-0.444176	-0.0391229	0.223102	0.287769	-0.939654	-1.12734	-1.46064
1700037H04Rik	3.40957	0.00515669	1.31663	-0.931122	0.0134742	-0.363526	-0.128128	0.138351	0.823346	-0.125607	-0.768036	-0.498317	-0.632916	-0.464746	-0.790397	-0.410628	-0.57426	0.832604	-0.0521431	-0.799304
1700040I03Rik	0.806875	-1.37859	-1.28697	-0.00729789	-0.998343	1.43393	2.34655	0.156737	0.776748	0.24908	-0.527503	-0.76986	-0.962449	-0.550378	0.450951	0.958575	0.739773	0.331829	-1.1055	-0.664156
1700047M11Rik	-0.389316	-0.313882	-0.397351	-0.31211	-0.397351	-0.354713	-0.397351	-0.397351	-0.379792	-0.355934	-0.382342	-0.380595	-0.149453	-0.224444	-0.36386	-0.390431	-0.382738	0.353686	3.49253	2.1228
1700048O20Rik	-0.263341	-0.303846	-0.303846	-0.303846	4.201	0.355506	-0.144833	-0.28032	-0.258954	-0.169795	-0.23058	-0.303846	-0.0723237	-0.290133	-0.244351	-0.234257	-0.249012	-0.303846	-0.29553	-0.303846
1700052K11Rik	0.176809	-1.19308	-1.19308	1.38455	3.06391	0.243386	0.897367	0.44408	0.117146	0.123842	0.681656	-0.335311	-0.0702513	-0.517184	-0.684989	-0.447031	-0.386092	-0.46549	-0.647161	-1.19308
1700052N19Rik	0.681704	-1.13698	-0.850763	-0.0571115	1.51175	0.91578	3.10094	-0.404023	0.356749	0.334438	-0.850152	-0.61906	-0.196682	-0.669421	0.0336151	-0.0316074	-0.260798	-0.0756828	-1.13179	-0.650897
1700054N08Rik	1.89909	-0.889007	-0.889007	-0.889007	-0.889007	0.614147	2.00564	0.502447	-0.265724	0.0435661	-0.838369	0.275522	-0.834719	-0.889007	1.20707	-0.125191	1.53573	0.0963512	-0.781511	-0.889007
1700081L11Rik	-0.862934	-1.6896	-0.996383	-0.286352	1.49319	1.03055	1.5064	-0.373404	-0.689926	0.354048	1.26073	0.969596	0.68468	0.688666	0.310657	-0.172924	0.288493	-1.10976	-0.873824	-1.53191
1700086O06Rik	3.53198	-0.288202	1.7823	-0.542784	0.796052	0.0760471	-0.542784	-0.292132	-0.105915	-0.341738	-0.542784	-0.222073	-0.542784	-0.301666	-0.273922	-0.251792	-0.386975	-0.465259	-0.542784	-0.542784
1700096K18Rik	-0.682359	-1.61892	-1.22161	-1.24968	1.3791	0.157856	-0.643606	1.86274	-0.813877	0.927373	1.80113	-0.00730004	-0.693585	0.397279	0.649814	-0.328903	-0.0484414	-0.572942	0.869179	-0.163241
1700097N02Rik	-0.903654	-0.94632	-0.970511	-1.03769	0.442594	1.86296	2.03831	0.67554	-0.0417599	0.545267	-0.138783	-0.682203	-0.754892	-0.886502	1.64725	0.580375	0.459971	-0.124025	-0.794403	-0.971528
1700112E06Rik	-0.580913	-0.66995	-0.833618	-0.833618	-0.833618	-0.750939	-0.689037	0.378617	2.21032	0.724012	-0.833618	-0.833618	-0.571531	0.49235	-0.613752	1.18682	2.3061	0.632509	-0.12826	0.241734
1700123O20Rik	0.0959304	-2.25389	0.062463	-0.483642	1.2862	0.445014	1.42286	0.312869	1.97947	-0.581206	-0.705924	-1.21475	-0.690071	0.0693432	0.133872	-0.319617	-0.333709	1.22208	0.53864	-0.985948
1810006K21Rik	-0.137603	-1.51142	-1.1631	3.04079	-0.137138	-0.168335	-0.284674	1.21329	0.916539	-0.0233644	0.8686	-0.548534	-0.395791	0.215334	0.0970158	0.571731	-0.113602	-0.696759	-0.72216	-1.02082
1810008A18Rik	-0.531175	-1.5436	-1.8559	0.417262	2.43678	0.354953	0.512406	-1.19024	0.114172	0.570196	0.889427	-0.25708	0.462566	-0.00810464	0.312116	0.930695	0.765198	-0.502895	-0.916082	-0.960702
1810009A15Rik	-0.0102989	-2.02596	-2.11621	-0.168474	0.757874	0.75697	0.947969	-0.102969	1.45048	0.0633167	0.379592	0.248176	1.30691	-0.506039	-0.366981	0.652305	1.01092	-0.0565706	-1.07472	-1.14629
1810011H11Rik	-0.65079	-0.65079	-0.65079	-0.65079	-0.65079	-0.65079	-0.335278	-0.473537	3.31957	0.385618	-0.32586	1.5009	-0.65079	0.193946	-0.563305	0.393319	-0.0324774	1.19041	-0.361984	-0.335787
1810012P15Rik	1.33083	-0.997611	1.40059	-0.0291923	0.439633	0.668219	-0.664306	1.99285	0.771801	1.1818	-0.246603	0.559381	-0.187322	-0.942137	-0.778853	-0.240628	-0.344263	-1.16015	-1.31169	-1.44234
1810013D10Rik	-1.03605	-1.33455	-1.29908	-0.501602	2.63189	0.86262	1.20853	-0.478441	-0.334637	0.279538	0.834036	-0.462436	0.495921	0.400293	0.605363	0.47966	0.395351	-0.792705	-0.817948	-1.13575
1810013L24Rik	1.35575	-1.68388	2.94995	-1.20097	0.441539	0.505404	-0.354424	-0.931404	-0.408268	-0.27593	0.0249477	-0.482282	0.247159	0.411363	-1.03139	-0.618396	0.176229	-0.0177941	0.725769	0.16663
1810014B01Rik	-0.119195	-0.950356	-1.14899	0.251727	-0.561745	1.35873	1.4433	-0.40985	1.1931	2.59589	0.364632	-0.4412	0.139153	-0.581844	-0.389294	0.37867	-0.100048	-0.766338	-1.10736	-1.14899
1810014F10Rik	-0.584269	-0.650289	-0.89013	0.307125	0.643215	-0.666759	-0.421586	-0.61243	0.00104995	0.433487	-0.89013	-0.470704	-0.89013	2.32543	0.0743875	2.24586	1.56572	-0.165255	-0.464457	-0.89013
1810020D17Rik	-0.331164	-1.67783	-1.75978	-0.0871915	1.36041	-0.154594	0.58403	0.863089	0.116651	1.46445	1.47131	0.427861	-0.603646	0.404345	0.532761	0.304081	0.577628	-0.888801	-1.5103	-1.0933
1810021B22Rik	-0.596731	-0.364895	-0.596731	-0.596731	-0.596731	-0.567111	-0.596731	-0.596731	0.223864	0.163284	0.652953	-0.397453	-0.416529	-0.126233	0.171335	-0.424605	-0.596731	2.15182	3.21726	-0.106572
1810022K09Rik	-0.470438	-1.49747	-1.64093	0.314308	1.6599	1.82461	-0.0723297	0.846468	0.711649	0.975849	0.274041	0.126922	0.31322	0.221861	-0.192099	0.491539	-0.129632	-0.902911	-1.25912	-1.59544
1810026B05Rik	-0.651176	-1.61036	-0.852861	0.967565	0.246385	-0.0218434	0.675562	0.499008	-1.17765	0.182598	2.07087	1.63194	1.48481	-0.564368	0.39979	-0.980439	-0.825974	-0.783243	-0.31214	-0.378481
1810026J23Rik	0.439728	-1.57191	-1.13835	1.87939	0.0587245	0.642928	1.45234	0.490218	1.79278	-0.0213633	0.430944	-0.637368	-0.223166	-0.120482	-0.0827551	0.406395	-0.39052	-0.488072	-1.30765	-1.6118
1810027O10Rik	1.45255	0.121293	1.36696	-1.19209	0.136681	0.0536042	-0.447788	-0.102633	1.92983	0.143623	-0.348146	-1.12311	-1.29592	0.102801	-0.0569171	1.06903	0.985195	0.0829546	-1.07088	-1.80703
1810029B16Rik	-0.25359	-0.581619	-0.797542	0.267059	1.06894	0.786655	-0.448118	-0.429171	3.60336	0.725209	-0.429445	-0.179569	-0.194488	-0.624407	-0.0943711	-0.0284472	-0.60228	-0.283344	-0.707286	-0.797542
1810030N24Rik	0.885071	-1.70226	-0.462894	-0.365976	1.92825	1.02127	1.66868	0.677503	-0.851803	-0.355663	1.40532	0.380242	-0.162304	-0.417383	0.0281206	-0.414834	-0.0137063	-0.964747	-0.93599	-1.3469
1810030O07Rik	-1.09981	-1.71768	-1.60737	1.91756	0.494559	0.46837	0.275221	-0.928288	0.076371	0.817228	0.742886	0.257687	0.540034	0.765293	1.24714	0.570395	0.207283	-0.934512	-1.15251	-0.93986
1810031K17Rik	1.2903	-1.65352	0.641686	0.00571342	-0.376516	-0.337242	-0.321075	2.69526	-1.32056	-0.466349	-0.219817	-0.254653	-0.341502	1.26839	0.255744	-0.0766072	1.0557	-1.13288	-0.208544	-0.50354
1810032O08Rik	-0.273772	-0.981628	-0.570815	-0.870702	0.688272	0.344241	0.248608	-1.00455	0.639864	1.78475	0.23032	0.242024	0.595136	0.435105	2.6431	-0.315561	-0.582552	-0.995664	-1.08922	-1.16696
1810033B17Rik	-0.559958	-0.408839	-0.507005	-0.486519	-0.548324	-0.549736	-0.50783	-0.56782	-0.303806	-0.550882	-0.510735	-0.506083	-0.288545	0.510086	-0.293776	-0.00205339	0.215726	0.596879	1.85528	3.41394
1810034E14Rik	-0.587785	-0.53084	-0.627814	1.13495	0.262125	-0.419621	-0.446266	-0.5035	-0.367937	-0.409348	3.78362	0.393376	-0.0924681	0.148369	-0.0468521	0.0222701	0.15492	-0.611566	-0.627814	-0.627814
1810035L17Rik	0.221524	-1.48871	-1.35981	0.413685	0.0401571	0.932865	0.284337	-0.959824	1.22449	0.992932	0.467256	-0.567737	-0.562924	0.46034	0.711435	1.46647	1.33892	-0.694978	-1.2493	-1.67112
1810037I17Rik	0.163099	-1.31014	-1.33914	-0.641837	-0.502767	-0.298581	-0.198789	0.479905	1.6242	-0.284555	-0.507902	-0.485517	-0.643399	-0.355118	-0.533606	0.494052	0.628017	2.99194	0.885875	-0.165746
1810043G02Rik	-0.563009	-0.947703	-1.30431	-1.30431	1.75164	-0.563987	-0.8985	1.47941	-0.282528	1.16962	0.441691	-0.833303	-0.981423	1.89851	0.527379	0.27272	0.689902	-0.409468	-0.282128	0.139803
1810043H04Rik	-1.06686	-1.7762	-2.05085	1.59592	-0.20081	0.551978	1.32767	0.425394	0.892796	0.44531	0.783891	0.182941	0.523138	0.0983287	0.482403	0.424478	0.315541	-0.581233	-0.998731	-1.3751
1810046J19Rik	-1.47444	-1.88772	-2.00991	1.41888	1.08961	0.626237	0.646156	1.26366	-0.529774	-0.337885	0.91829	0.172579	0.746551	0.493231	-0.0753202	0.383023	0.256841	-1.05835	-0.282066	-0.359608
1810049H13Rik	-0.122057	-0.923897	-1.39048	-1.00453	-0.740561	-0.495842	-0.484137	-0.373023	1.02807	1.34097	2.73234	1.19906	-0.243456	0.389388	-0.226699	0.742612	0.315455	-0.248787	-0.454967	-1.03946
1810055G02Rik	-0.338592	-0.592169	-0.71528	-0.71528	-0.71528	-0.441999	-0.217044	-0.265565	1.06034	-0.187912	-0.386214	-0.424036	0.461248	-0.283299	-0.204221	0.0816951	-0.440297	3.37243	1.66675	-0.71528
1810058I24Rik	0.448449	1.77753	3.62795	-0.559815	-0.410331	-0.545694	-0.525516	-0.320566	-0.442638	-0.343908	-0.232768	-0.440411	-0.308872	-0.338105	-0.364964	-0.416555	-0.478986	-0.0307063	0.00416463	-0.0982507
1810063B05Rik	-0.734151	-1.65151	-1.76129	1.12466	-1.12251	0.200108	1.27739	1.11175	0.429179	0.103987	1.18071	-0.194261	-0.45029	0.366948	0.60695	0.642713	1.32782	-0.165622	-1.01498	-1.27761
1810063B07Rik	-0.941166	-1.11851	-1.19518	1.68009	0.239461	-0.206724	-0.786218	0.167322	0.0108331	0.935991	1.80909	1.7331	0.592066	0.0510033	0.548986	0.393276	-0.757905	-0.968849	-1.08635	-1.10031
1810065E05Rik	-0.198611	-0.230244	-0.230244	-0.230244	-0.230244	-0.230244	-0.230244	-0.230244	-0.198315	-0.230244	4.24817	-0.230244	-0.230244	-0.230244	-0.230244	-0.230244	-0.230244	-0.203512	-0.19408	-0.230244
1810074P20Rik	-0.714101	-0.939197	-0.86188	3.76077	0.607004	0.0780607	-0.223167	0.281804	0.0418394	0.14104	0.464105	-0.216179	-0.236109	0.149082	0.0362731	0.183189	-0.291399	-0.739069	-0.634756	-0.88731
2010001M09Rik	-0.354873	-0.351608	-0.35082	4.02803	0.977046	0.0880944	0.0307489	-0.354598	-0.348321	-0.353088	-0.242943	-0.354066	0.0661073	-0.354347	-0.347729	-0.356641	-0.352795	-0.354662	-0.356283	-0.357258
2010002M12Rik	-0.335563	-0.1634	-0.335563	-0.335563	-0.0269444	-0.335563	-0.296095	-0.335563	-0.328029	-0.335563	-0.296082	-0.274828	-0.163706	-0.275353	-0.258211	-0.319964	-0.27517	-0.293839	0.898816	4.08618
2010002N04Rik	-0.848065	-0.857253	-0.646568	-0.813639	0.141678	-0.487637	-0.225954	3.30313	-0.594438	0.827569	0.699364	-0.953268	-0.712424	0.399744	1.13123	-0.395232	-0.557237	-0.175378	0.190413	0.573967
2010003O02Rik	-0.719935	-1.79307	-1.95042	0.643279	0.923558	0.329673	-0.451037	1.64835	0.527952	1.18206	1.26959	1.11179	0.059976	-0.137344	-0.0902835	-0.0300708	-0.245802	-0.0401979	-0.969825	-1.26824
2010011I20Rik	2.55644	1.274	2.85673	-0.32166	-0.214578	-0.412485	-0.417157	-0.415829	-0.419396	-0.350842	-0.374223	-0.398164	-0.412421	-0.384446	-0.405573	-0.420421	-0.417854	-0.438804	-0.437977	-0.445348
2010012O05Rik	-0.50388	-1.44277	-1.26011	0.401142	2.55566	0.353721	0.1944	-0.461549	0.326923	1.38624	0.555782	-0.704128	0.652057	0.58113	-0.0427512	0.645912	0.202454	-1.09258	-1.13634	-1.21131
2010106G01Rik	-0.145415	-1.34861	-1.30581	0.723301	0.141274	-0.453661	-0.5173	-0.348274	-0.733891	-0.21028	1.01275	-0.472934	-0.529844	2.74401	1.53938	0.836612	0.640433	-0.997136	-0.420696	-0.153908
2010107E04Rik	-0.0135101	-1.89005	-1.68937	-0.189364	1.13853	1.2768	0.533576	0.0353027	1.23834	0.334632	0.320704	-0.0409097	-0.395887	0.479029	0.0865091	1.52716	0.709732	-0.805443	-1.03602	-1.61975
2010107H07Rik	-0.561928	-1.49897	-1.34746	-0.376315	-0.71944	-0.465648	-1.16564	0.635202	2.65738	0.606469	0.0033115	-0.222773	-0.123128	0.509635	-0.492277	0.134269	-0.448229	0.497796	0.600016	1.77773
2010109K11Rik	0.843188	-0.650663	1.52517	2.82959	-1.06518	-0.228526	-0.394402	-0.479403	-0.941555	-0.212711	-0.754473	0.294442	0.787919	0.303502	-0.236344	0.361047	0.869452	-0.952516	-1.01421	-0.884318
2010204K13Rik	0.162118	-0.586362	-0.586362	0.0824987	-0.0939629	1.173	-0.586362	1.64921	0.117683	3.32751	-0.467804	-0.586362	0.228987	-0.586362	-0.586362	-0.571161	-0.397755	-0.519432	-0.586362	-0.586362
2010300C02Rik	-0.348178	-0.348178	-0.193738	-0.348178	3.94543	-0.182584	-0.348178	-0.348178	-0.348178	0.292391	-0.348178	1.23868	-0.348178	-0.320588	-0.253274	-0.348178	-0.348178	-0.348178	-0.348178	-0.348178
2010305A19Rik	-0.0559712	-0.994575	-1.50903	0.0450434	1.05661	2.38747	0.20737	-0.186463	0.224976	0.962211	-0.313955	0.222909	0.979501	-0.228772	0.453077	0.958985	-0.155777	-1.14192	-1.40266	-1.50903
2010317E24Rik	-0.329722	-0.459481	-0.398779	-0.494887	-0.334683	1.07903	3.9163	0.157857	-0.0583697	-0.354799	-0.494887	-0.451812	-0.449907	-0.494887	0.266977	-0.261275	0.151079	-0.0425218	-0.450347	-0.494887
2010320M18Rik	0.103492	-1.15227	-1.0911	1.6789	-0.356015	-0.43333	-0.368843	-1.01236	0.225154	0.829838	2.64789	-0.445968	0.418242	0.620677	0.608213	0.677386	-0.227915	-0.820473	-0.559958	-1.34155
2010321M09Rik	-0.120686	-1.35324	-1.05688	-0.679489	0.780046	1.84893	2.66076	0.487464	0.019814	0.863689	0.0335368	-0.359986	0.45943	-0.586792	-0.101687	-0.349892	-0.0109538	-0.698351	-1.41447	-0.42124
2200002D01Rik	-0.431143	-0.451402	-0.451402	-0.451402	3.74377	0.617754	1.46184	-0.193809	-0.410232	0.110561	-0.0354655	-0.188679	-0.246832	-0.421319	-0.451402	-0.451402	-0.451402	-0.451402	-0.395233	-0.451402
2210010C17Rik	-0.448903	-0.448903	-0.448903	-0.448903	1.78687	-0.0705488	-0.356389	3.69915	-0.121169	-0.0157367	-0.448903	-0.126889	-0.448903	-0.366538	-0.448903	-0.235405	-0.319605	-0.231894	-0.0506227	-0.448903
2210012G02Rik	-0.173357	-2.00855	-0.452646	-1.21617	2.41355	0.526352	0.40943	-0.746356	0.180908	-0.34978	0.603239	-0.478244	0.931465	1.07017	0.259519	0.813748	0.808452	-1.02833	-0.808952	-0.75444
2210013O21Rik	-0.647912	-0.77093	-1.0506	-0.227869	2.82569	-0.418397	-0.774631	0.311725	1.3857	1.32443	-0.344032	0.417879	-1.0506	0.386256	0.233548	0.5718	0.367445	-0.606002	-0.956218	-0.977281
2210015D19Rik	-0.0492637	-1.68225	-1.68225	-0.9064	-0.197187	1.6055	2.02315	0.256802	-0.0828622	0.286039	-0.642038	0.567073	0.293744	0.017446	0.603568	1.03845	0.513529	0.443319	-1.07435	-1.33201
2210016F16Rik	-0.306694	-1.31719	-1.66495	1.71023	-0.546614	0.336534	0.698124	0.394234	0.000848802	0.00503859	1.14601	0.995518	0.288653	0.838622	-0.542001	0.980244	0.903977	-1.01246	-1.49036	-1.41776
2210016L21Rik	-0.855401	-1.54317	-1.68457	-0.19728	1.74462	0.848728	0.344209	-0.28659	0.299334	1.24401	1.07381	0.843181	1.17987	0.0829438	0.592362	0.0194886	-0.459062	-0.887296	-1.09815	-1.26102
2210018M11Rik	1.08503	-1.60974	-1.31167	-0.847925	0.795526	1.74879	1.66552	1.0256	-0.591624	0.419044	-0.361834	0.342971	0.174958	-0.32444	0.589228	-0.482632	0.720888	-0.760915	-1.35558	-0.921201
2210020M01Rik	-0.00657827	-0.415141	-0.357225	-0.450749	-0.450749	-0.419095	-0.430892	-0.386168	-0.284456	-0.0120725	4.11801	-0.424255	-0.418427	-0.0747228	0.49271	-0.128073	0.11144	-0.0962268	-0.0509708	-0.316355
2210021J22Rik	0.205974	-0.998643	-0.708143	3.81656	-0.29099	0.374953	0.552045	-0.311815	0.134126	0.089967	-0.0524408	0.3648	-0.317608	-0.176172	-0.338719	0.104812	-0.175922	-0.508958	-0.895771	-0.868055
2210403K04Rik	-0.776849	-0.683412	-0.0853306	0.00144477	-0.758089	-0.707666	-0.839268	-0.358433	-0.862155	-0.526104	0.460389	-0.439677	0.437111	2.32076	-0.52419	0.185194	0.770196	-0.712368	0.365682	2.73276
2210404J11Rik	-0.738213	-1.29191	-1.29191	2.60101	-0.848885	0.434533	1.5744	0.703984	-0.0799597	0.352982	-0.0115412	-0.335011	1.08611	0.585622	-0.222545	0.186788	-0.0500452	-0.590968	-0.772525	-1.29191
2210404O07Rik	-1.01168	-1.01168	-1.01168	-0.629423	1.44834	-0.250897	-0.686212	2.27577	0.0200971	0.818561	2.32624	-0.402112	-0.587312	0.147729	0.104097	0.252814	-0.393042	-0.0876678	-0.631951	-0.689984
2210411K11Rik	1.25123	-1.00219	-0.784144	2.68342	-0.542242	-0.0562585	-0.802731	1.52793	0.568632	0.726977	-0.798407	0.4528	0.644494	-0.576267	0.00186942	-0.100502	-0.325795	-0.800827	-1.01518	-1.0528
2300009A05Rik	-0.890719	-1.31059	-1.50582	2.56017	-0.0854219	-0.194461	-0.915916	0.811795	0.275507	0.810167	0.546545	0.987334	0.428773	0.389464	0.0724925	0.958202	-0.840213	-0.137424	-0.652971	-1.30692
2310001A20Rik	-0.430102	-1.28958	-1.49154	0.976012	-0.519868	0.688947	0.440585	0.366632	2.45642	-0.0363127	0.481173	-0.74378	-1.36119	-1.15784	0.260139	0.43259	-0.610148	1.36399	0.525761	-0.351899
2310001H17Rik	-0.844679	-0.557773	-0.862549	-0.249361	-0.212423	-0.377685	-0.581858	0.97455	-0.179606	-0.246176	-0.57978	-0.343948	0.0429711	0.224837	-0.507692	-0.368767	-0.303134	-0.059179	1.53059	3.50166
2310003C23Rik	3.86429	-0.857425	0.756807	-0.508337	0.754858	-0.461633	-0.129273	-0.507995	-0.305409	-0.253489	-0.166483	-0.801799	-0.559469	-0.396578	0.116075	-0.196186	0.03567	-0.168683	-0.248989	0.0340521
2310003F16Rik	0.88303	-2.07476	-1.70446	0.381848	0.976939	0.373637	0.598382	0.549253	0.296838	0.824659	1.1495	0.481728	0.478977	-0.411	0.489817	0.552287	0.25739	-1.03636	-1.52131	-1.54639
2310004I24Rik	-1.66078	-1.52112	-2.12733	1.85392	0.3388	0.579391	1.22623	-0.724471	0.559664	-0.18172	-0.841762	0.822503	-0.202021	0.93133	0.511053	-0.170557	0.700996	-0.132674	0.17249	-0.133939
2310004N24Rik	-0.977838	-1.6218	-1.6569	-0.668073	1.27984	1.4492	0.769799	0.864482	0.485616	0.708515	0.884188	-0.263255	-0.302458	0.464539	0.557697	0.957545	0.357474	-0.769261	-1.00792	-1.51139
2310005G13Rik	-0.26168	-0.359559	-0.359559	-0.359559	-0.359559	-0.228047	-0.359559	-0.359559	-0.324576	-0.359559	-0.359559	-0.359559	0.599524	-0.135881	-0.359559	-0.359559	-0.248324	0.922073	3.99162	-0.359559
2310008H04Rik	-0.374662	-1.136	-1.0049	0.0890617	-1.51721	-0.153404	1.17991	1.20799	0.0297504	0.131895	-0.0914094	-1.32558	-1.25592	0.0254637	0.285101	0.183391	2.60948	0.259618	-0.142892	1.00031
2310008H09Rik	-0.0141555	-1.4781	-1.55923	0.168746	0.425739	1.20411	0.606607	-0.0772711	1.1944	2.38459	0.285409	-0.342009	-0.43124	0.0432955	0.869659	0.326857	-0.316291	-0.716975	-1.11277	-1.46137
2310008N11Rik	-0.372596	-0.372596	-0.372596	-0.372596	1.98226	0.829446	3.47237	-0.372596	-0.372596	-0.372596	-0.372596	-0.372596	-0.372596	-0.322551	-0.372596	-0.372596	-0.372596	-0.372596	-0.372596	-0.372596
2310009A05Rik	-0.918895	-2.06734	-1.9785	-0.726513	2.60746	0.300512	0.0221209	0.504465	0.770052	0.402494	0.469942	-0.348694	0.279276	0.438874	0.244589	0.198587	-0.333949	-0.0146542	0.668825	-0.518644
2310009B15Rik	-0.358199	-1.32669	-1.42986	-1.05284	1.3048	0.786872	0.248092	0.0631911	0.550501	1.32197	0.171983	-0.373501	-0.879043	2.02762	-0.0958911	0.713921	1.09887	-0.674378	-0.840226	-1.25719
2310010J17Rik	0.399012	-0.548954	2.75937	0.542031	0.414065	-0.665377	-0.65732	-0.229148	-1.0316	-0.537835	1.51981	-0.0283563	-0.00521246	-0.712486	-0.840487	-0.879363	-0.614368	-0.80329	0.246902	1.67261
2310011J03Rik	0.711854	-2.32661	-1.89776	-0.586889	0.693564	0.730924	1.5342	1.39943	0.268663	0.52855	0.479296	-0.0446582	-0.187321	0.177514	-0.0208127	0.936253	0.0552158	-0.819766	-0.445868	-1.18577
2310015A10Rik	0.0396443	-0.438928	-0.00328595	-0.314342	-0.0388392	-0.632941	-0.737481	0.317568	-0.75286	-0.156638	0.447006	-0.100275	-0.518549	0.116015	0.0390283	-0.379124	-0.664626	-0.591764	0.440316	3.93008
2310016M24Rik	-1.33312	-1.87398	-1.89583	0.717894	1.25421	0.0498829	-1.20501	0.0707351	0.287599	0.78893	1.82047	0.358189	-0.245782	0.58578	0.380978	0.55435	0.947146	-0.577282	-0.566463	-0.118695
2310022A10Rik	0.619968	-1.50455	-1.64944	1.04134	0.801567	1.82151	1.35672	0.580286	-0.286169	0.3683	-0.232251	-0.556912	1.29087	0.460161	-0.312015	-0.432666	-0.639899	-0.197004	-1.35585	-1.17397
2310022B05Rik	3.43002	-0.396795	1.03109	0.0869239	-0.592433	-0.336807	-0.498764	-0.592433	-0.471318	0.0373956	1.7617	-0.474813	-0.380175	-0.359288	0.0534278	-0.33166	-0.333418	-0.563937	-0.575069	-0.493653
2310030N02Rik	-0.360034	-0.846658	-1.15573	-1.15573	1.79716	1.1794	-0.381728	-0.680001	1.05516	2.18112	-0.292412	-0.0137766	0.036141	0.150798	0.879718	0.435834	0.274222	-0.949704	-0.998064	-1.15573
2310033P09Rik	1.52748	-1.38825	-1.61395	0.228037	2.65798	0.797351	0.375275	-0.61006	0.400935	0.584121	-0.217131	0.704618	0.245791	-0.841845	-0.185452	0.0766348	-0.402445	-0.667692	-0.904976	-0.766419
2310035C23Rik	-0.816664	-1.77987	-0.885565	-1.09291	1.33667	-0.461376	0.175895	-0.0959271	-0.00302622	-0.063726	1.30682	-0.120079	-0.365853	0.67507	2.12098	-0.0480742	1.82545	-0.687866	-0.557251	-0.462696
2310035K24Rik	0.284223	0.088369	1.66085	0.631576	-0.944694	-0.299093	-0.743575	-0.255274	-1.03148	-0.312295	-0.779891	0.0128152	-1.13944	2.22864	0.330075	0.326837	1.89594	-1.2941	-0.786134	0.126648
2310036O22Rik	0.577629	-2.04394	-1.7902	0.618399	1.00724	1.00418	2.31986	0.0795519	0.00850359	-0.106956	-0.0808854	-0.318355	-0.0814609	-0.399138	0.128197	-0.0646179	1.13712	-0.0716915	-0.826622	-1.09681
2310037I24Rik	-0.354551	-1.34749	-0.726801	1.15383	1.6849	2.07989	1.49867	-0.0709976	0.579021	0.501384	-0.225279	-0.61109	-0.424255	-0.0950851	-0.327461	0.0671281	0.236278	-1.0202	-1.31141	-1.28649
2310039H08Rik	-0.321577	-1.3382	-1.3532	0.89948	-0.592414	0.201679	0.00740557	0.330214	1.35092	2.06984	1.80937	0.0392087	0.0485591	-0.316591	0.375756	0.587154	-0.518357	-0.883634	-1.00704	-1.38858
2310040G24Rik	-0.735994	-0.942965	-1.05553	-1.05553	2.26314	-0.241841	-0.611596	-0.611906	0.895597	0.468458	0.83943	-1.05553	-0.685487	1.11739	1.68811	0.731533	-0.00966597	0.53792	-0.77374	-0.761804
2310044G17Rik	-0.326914	-0.977219	-1.27938	0.848181	0.46659	0.576858	1.92764	-0.85415	-0.128739	1.1767	0.41773	2.37203	-0.0260218	-0.218546	-0.493431	-0.490562	-0.0918342	-0.808923	-1.09233	-0.99767
2310044H10Rik	0.711492	-1.82014	-1.42649	0.876796	0.0867804	0.13277	-0.0128775	0.51109	0.500435	0.266855	1.75016	0.505958	0.19432	-0.129908	1.08869	0.47757	0.631377	-1.01425	-1.60146	-1.72917
2310045N01Rik	-1.2544	-1.72126	-1.19447	0.715262	1.94615	-0.582058	-0.879906	1.5478	0.275863	-0.964336	1.5346	0.938135	0.35876	-0.240838	0.567181	-0.475731	-0.196771	-0.382274	0.189113	-0.18082
2310046O06Rik	-0.628238	-1.18906	-1.64933	2.16657	-0.0629984	0.383672	-0.376077	1.33137	1.22541	0.390231	0.42579	0.682428	0.180352	-0.582608	0.756878	-0.00968457	-0.700279	0.249287	-0.772475	-1.82123
2310047B19Rik	-0.470778	-1.11138	-1.11138	2.00091	-0.559064	-0.00156909	2.81216	-0.50595	0.37192	-0.101556	-0.230957	0.0509702	-0.26232	-0.0948513	0.898025	0.416028	0.487663	-0.701573	-0.774909	-1.11138
2310047M10Rik	-0.810672	-1.00522	-1.16951	-0.409922	-0.973606	-0.576395	-0.587188	-0.535986	-0.520425	-0.214001	0.34348	-0.423221	0.184607	2.39789	2.05825	0.813203	0.382911	-0.593597	0.208885	1.43051
2310061C15Rik	1.20914	-1.16985	-0.922424	-0.449661	-0.331773	1.35408	2.08976	0.452833	0.112064	-0.292751	-0.88333	-0.599498	-0.741045	-0.830387	0.599621	0.126175	1.58225	0.898742	-1.03645	-1.1675
2310061I04Rik	-0.0448692	-1.49441	-1.36247	-1.21723	1.41745	-0.0305451	-1.34187	0.978915	0.963769	1.38102	-0.279158	1.16904	1.50523	0.173775	0.268438	0.307353	-0.282729	-0.236211	-1.03834	-0.837149
2310061J03Rik	-1.25388	-0.962254	-1.0413	-1.29104	1.74707	0.208281	0.28381	1.76897	1.0264	1.66238	-0.234711	0.0354926	0.531114	0.0944121	0.455906	0.241627	-0.573498	-0.71948	-0.666085	-1.31322
2310067B10Rik	0.793281	-1.37377	-1.81635	-1.31778	-0.55902	-0.680181	0.915198	0.0433048	-0.118261	1.42819	-0.575937	-0.378932	1.60391	-0.420947	0.887895	1.21428	1.36027	-0.4316	-0.499548	-0.0739887
2400001E08Rik	-0.657175	-1.67357	-1.54801	-0.703816	-0.462104	-0.0153611	0.0407204	-0.480118	0.0772202	-0.135508	0.039052	-0.543359	-0.802508	1.24903	0.697803	1.49782	2.47822	1.01169	0.0221586	-0.0921952
2400003C14Rik	-0.673422	-1.84787	-1.50535	-1.403	1.91898	0.590543	1.20804	0.487052	-0.246612	0.360737	0.365694	-1.19634	-0.163888	1.10665	0.639525	0.400055	0.986333	0.0577621	-0.661623	-0.42327
2400009B08Rik	-0.728552	-0.666259	-0.601758	-0.0877719	-0.621496	-0.765502	-0.69076	-0.574833	2.45895	-0.0727447	1.06433	-0.743439	-0.693413	0.163678	2.59071	0.318042	0.319668	0.38971	-0.486918	-0.571637
2410001C21Rik	-0.210366	-2.23646	-1.16512	0.258106	2.56794	0.245225	0.567625	0.467679	-0.470221	0.455753	0.834472	-0.781318	-0.623958	0.631248	0.581232	-0.00991	0.476729	-1.23288	-0.753487	0.397712
2410002F23Rik	-0.244959	-1.23883	-1.10318	-1.05455	1.22405	0.554413	0.053606	0.261781	0.386546	1.19206	1.96726	1.21327	1.09024	-0.68352	0.446675	0.0641734	-0.941373	-0.742236	-1.22417	-1.22126
2410002O22Rik	-0.124569	-1.63601	-1.42203	0.444674	1.41908	1.0731	2.30867	0.181819	0.629192	0.817488	0.142989	-0.751582	-0.671503	-0.540992	0.0284467	0.104278	0.56503	-0.245601	-0.963261	-1.35923
2410003K15Rik	-0.706226	-1.53117	-1.88688	-0.25338	2.06139	0.682991	0.558027	-0.613785	0.967452	0.736677	0.210244	-0.15725	-0.667579	0.588027	0.75289	0.707322	1.1163	-0.434612	-0.97102	-1.15942
2410004B18Rik	0.449974	-1.89509	-1.58952	-0.10717	2.20469	0.0384428	1.97229	-0.215541	-0.0396907	0.108962	-0.556637	0.363369	-0.991063	-0.0537188	-0.0146688	0.41341	1.11655	-0.860122	-0.497986	0.153513
2410004N09Rik	-0.663771	-0.982209	-1.08588	-0.716298	0.887456	-0.22634	-0.640846	-0.372996	0.436112	2.53768	1.245	0.427089	0.642286	0.41959	1.4613	0.125196	-0.3601	-0.965463	-1.09505	-1.07275
2410006H16Rik	-0.95687	-1.18027	-1.21919	-0.810821	0.926705	-0.000539088	0.0283172	1.12977	-0.57913	1.21247	1.72364	0.033451	0.746501	0.890129	1.63845	-0.217144	-0.128267	-1.14883	-1.17811	-0.910265
2410015M20Rik	0.123554	-1.62659	-1.49989	0.763544	0.0549376	0.33708	-0.368545	0.113101	1.49871	0.975195	1.37857	1.32924	0.729155	-0.167289	0.29583	0.164641	-0.102733	-0.903198	-1.3409	-1.7544
2410016O06Rik	-1.17185	-1.70371	-1.7622	0.089861	1.01845	0.969762	-0.633404	1.11011	0.809534	0.570378	-1.22076	-0.772827	0.129459	-0.388778	-0.813698	0.481228	0.27275	0.551975	0.754528	1.70919
2410017P09Rik	-0.743393	-1.51373	-1.58812	0.461196	0.889709	0.73042	-0.411249	-0.0359438	0.352634	0.318126	-0.232958	-1.12802	-0.429624	1.0655	0.505771	1.62178	2.14918	-0.540789	-0.439482	-1.031
2410022L05Rik	-0.141491	-0.521947	-0.521947	3.57607	-0.521947	-0.352629	-0.066606	-0.388024	1.67682	0.311377	-0.521947	-0.521947	-0.318721	0.136675	-0.521947	0.590913	-0.438186	-0.480847	-0.451718	-0.521947
2410042D21Rik	1.73042	-1.16428	-0.843506	0.560462	-0.32313	-0.400893	1.7318	0.0127345	0.920382	-0.0872997	-0.269138	-0.798299	-0.61288	-0.774663	1.23927	0.0625035	1.63634	0.0332127	-1.12385	-1.52919
2410066E13Rik	2.54122	-0.707987	0.793873	0.859121	0.957708	0.305609	2.15755	-0.852271	-0.802593	-0.0945206	-0.50711	0.317492	-0.308458	-0.852271	-0.59637	-0.685345	-0.716861	-0.712735	-0.538648	-0.557405
2410075B13Rik	-0.675804	-0.758185	-1.019	-1.019	-0.217053	1.37504	-0.0856715	2.08621	0.305796	2.46324	0.347755	-0.523863	0.610299	-0.243481	0.200175	0.23803	-0.697878	-0.527699	-0.839925	-1.019
2410076I21Rik	0.414538	2.21168	3.43141	-0.368049	-0.368049	-0.368049	-0.352646	-0.315845	-0.361933	-0.327104	-0.354554	-0.368049	-0.344982	-0.354558	-0.355144	-0.362811	-0.365325	-0.358047	-0.364433	-0.368049
2410089E03Rik	-1.05745	-0.876993	-0.937624	1.20368	3.2107	-0.313829	0.193251	-0.685193	-0.731493	0.176512	0.523482	-0.689974	0.905334	-0.213631	0.516792	-0.198853	0.629738	-0.566738	-0.735251	-0.352458
2410091C18Rik	-0.485174	-1.02596	-1.44517	-0.597272	1.00306	0.152326	0.14068	-0.095336	-0.0369128	0.515788	-0.883211	-1.10271	-0.281469	1.77698	0.449394	1.93791	1.8791	-0.672741	-0.538408	-0.690879
2410127L17Rik	2.33892	-1.63065	-0.837497	-0.211815	0.505547	1.01924	0.975282	-0.0212654	0.810083	0.994309	0.154126	-0.0766568	-0.142518	-0.628675	0.45227	0.148787	-0.0350586	-0.593776	-1.50713	-1.71352
2500003M10Rik	0.0330591	-1.58067	-1.00594	-0.160416	1.7774	1.41889	2.38896	-0.0586689	-0.181218	0.122551	0.215276	-0.333441	0.0812104	-0.608222	0.520419	-0.00780519	0.451519	-0.527399	-1.22205	-1.32344
2510002D24Rik	-0.289414	-1.19102	-1.35866	0.0520975	1.04985	0.372373	0.0557761	1.19475	0.112109	0.975542	1.28267	1.34503	1.92659	-0.757745	-0.311837	-0.619478	-1.05717	-0.747304	-0.863514	-1.17065
2510003D18Rik	1.82613	-0.128507	3.73023	-0.325109	-0.325109	-0.320395	-0.325109	-0.325109	-0.312412	-0.298117	-0.304603	-0.325109	-0.325109	-0.315404	-0.325109	-0.325109	-0.31561	-0.318578	-0.316762	-0.325109
2510003E04Rik	0.373995	-1.40768	-1.24927	-0.246216	1.5534	0.384147	0.721018	2.4538	-0.385925	0.687234	1.20918	-1.0358	0.050801	-0.457937	0.0879684	-0.164502	0.0766442	-0.595462	-0.653815	-1.40158
2510006D16Rik	1.0297	-2.09747	-1.31485	-0.240273	1.64916	0.147038	0.351012	0.352397	0.0856878	-0.0981764	0.885823	-0.262119	-0.0560578	1.16023	0.637408	0.689106	0.860661	-1.2756	-1.53655	-0.967128
2510012J08Rik	2.25716	-1.70428	-1.23517	-0.382234	0.741693	1.65346	1.04783	-0.561787	-0.168125	0.490399	-0.217692	-0.383993	0.766585	-0.240915	0.0535078	0.441268	0.376003	-0.523396	-1.1588	-1.25151
2510039O18Rik	-0.987958	-2.33708	-2.64863	0.288177	0.385467	0.0678072	0.71682	-0.190568	0.415537	0.647741	0.999492	0.717967	-0.383471	0.40194	0.638653	0.569267	1.16818	0.170034	-0.232575	-0.406798
2610001J05Rik	-1.18339	-1.51184	-1.51809	-0.867565	0.986861	-0.00465028	0.0491362	1.25687	0.712967	0.434665	1.45188	-0.485637	-0.68446	0.714699	0.722872	1.24398	1.20394	-0.790303	-1.0009	-0.731022
2610002D18Rik	2.46715	-0.831531	-0.831531	-0.831531	-0.831531	1.7312	1.2243	0.0252961	1.17331	0.622382	-0.831531	-0.69299	-0.773541	-0.785812	0.0479706	0.361123	0.275859	0.0824492	-0.769518	-0.831531
2610002I17Rik	-0.472235	-0.958221	-0.266789	1.33277	1.42769	1.03605	2.50305	-0.10557	0.688391	-0.42089	-0.331979	-0.343392	-0.717239	-0.412878	0.697973	-0.0407036	0.0723571	-1.11161	-1.21914	-1.35764
2610002J02Rik	-1.15113	-1.54801	-1.74534	-0.852251	-0.820865	-0.708754	-0.844076	1.8023	0.710775	0.609295	0.891755	1.16834	0.222384	0.183756	1.27475	0.111362	0.669458	0.744883	0.0593542	-0.77798
2610002M06Rik	1.15018	-1.19933	-1.11902	0.61123	2.05475	1.29784	1.99305	-0.392186	0.392956	-0.0437147	-0.754271	-0.157988	-0.415872	-0.198133	-1.47185	-0.0744379	0.0914586	-0.804208	-0.886283	-0.0741771
2610005L07Rik	-0.662996	-1.51221	-1.34166	-0.58174	1.59665	0.50444	1.33623	0.262657	-0.58173	1.23703	1.37746	1.42752	0.0476896	-0.356086	0.66179	-0.181037	-0.236762	-0.882236	-1.0242	-1.09081
2610015P09Rik	-0.67986	-0.798448	-1.08328	0.846588	1.99185	-0.41606	1.58893	-0.476802	-0.114536	1.74442	0.481538	0.573451	-0.598673	0.00605185	1.16334	-0.574205	-0.624157	-0.953081	-0.993801	-1.08328
2610018G03Rik	-1.30766	-1.50298	-1.47017	-1.61633	0.11275	-0.374141	0.948063	1.44466	1.91096	0.791039	-0.175915	0.258213	-0.752231	-0.461909	0.0981838	0.419392	1.23756	0.495395	-0.0380973	-0.0167927
2610019E17Rik	-0.224902	-0.969471	-0.838911	-0.969471	0.258938	0.300566	-0.512235	2.75556	1.18504	2.0229	0.424407	0.0489914	-0.374164	-0.385923	-0.674633	0.32047	-0.0896027	-0.544946	-0.763149	-0.969471
2610021K21Rik	0.547717	-0.895924	0.492863	-0.13213	-0.895924	0.439719	3.10873	-0.130939	0.281697	-0.561651	-0.85924	-0.895924	-0.895924	-0.684413	1.11598	-0.0926013	0.762511	0.836054	-0.644677	-0.895924
2610027L16Rik	-0.469503	-1.24251	-1.50451	0.484061	0.953716	1.3279	2.28961	-0.326028	0.62038	0.95076	-0.589206	-0.386713	-0.513544	-0.321104	0.784009	0.636732	0.409925	-0.749839	-1.3231	-1.03103
2610029G23Rik	0.572992	-1.35362	-1.3472	1.38806	0.640797	1.76984	2.18989	-0.374571	0.578487	0.243118	-0.365644	-0.378773	-0.302127	-0.607531	0.114875	0.204688	0.0371558	-0.480648	-1.25809	-1.27172
2610029I01Rik	0.592646	-1.12531	-1.06958	-0.454031	0.0401972	-0.38196	-0.212538	-0.148481	-0.478336	0.172756	-0.849384	0.161343	0.629738	2.19106	0.851051	1.88278	1.38746	-0.993649	-0.993147	-1.20261
2610039C10Rik	-0.236147	-0.853303	-0.969123	-0.92059	-0.879375	0.546797	1.61839	0.569962	0.302559	-0.149738	-0.679228	-0.520681	-0.68901	-0.430976	0.8414	0.980589	2.78657	0.326661	-0.743705	-0.901053
2610101N10Rik	1.23603	-1.86995	-1.58424	0.174418	0.871784	1.28897	1.83885	-0.393282	0.460841	0.470986	-0.0373838	-0.220127	0.156243	-0.356992	0.568592	0.430263	0.343602	-0.622332	-1.25654	-1.49973
2610301B20Rik	0.228057	-1.09805	-0.827403	-0.35688	0.937737	0.347458	0.818833	1.38262	0.8977	2.2354	0.281556	0.167698	-1.09805	-0.513442	1.23623	-0.625197	-0.933054	-0.934139	-1.04902	-1.09805
2610301G19Rik	-0.971706	-1.43595	-1.43595	0.205416	1.44258	1.56188	1.43283	-0.383578	1.26495	0.769323	-0.193822	0.898817	0.931921	-0.848309	-0.402117	-0.0211442	-0.237464	-0.597113	-0.930451	-1.05011
2610307P16Rik	-0.497544	-0.427188	-0.5093	-0.152737	3.49393	-0.0542626	1.18659	-0.361045	-0.448738	1.60431	-0.389919	-0.426108	-0.325963	-0.5093	0.0573405	-0.5093	-0.5093	-0.476386	-0.235779	-0.5093
2610318N02Rik	-0.388839	-0.531576	-0.430029	-0.512323	0.204425	2.06924	3.36354	-0.0711827	0.125517	0.0392434	-0.509404	-0.533914	-0.376623	-0.578118	0.403379	-0.0156639	-0.53558	-0.566041	-0.563699	-0.592362
2610507B11Rik	-0.0862563	-1.71301	-1.66652	-0.286458	1.53397	0.939213	1.02278	-0.354551	0.0396642	1.13424	1.35768	-0.226532	0.282562	0.344947	0.503332	0.36452	0.509815	-0.882418	-1.31398	-1.50299
2610507I01Rik	-0.569888	-0.684444	-0.572797	-0.674543	-0.309522	-0.584878	-0.637624	0.436237	0.665243	-0.266919	-0.588859	-0.500816	-0.507976	-0.153975	-0.459688	-0.330492	-0.433922	1.02558	2.27667	2.87262
2610524H06Rik	-0.123339	-1.23596	-1.03851	1.83302	-0.0270031	1.26578	-0.401531	-0.383562	0.675532	1.93305	1.15907	-0.0648775	0.313137	-0.378723	0.364082	0.499238	-0.79861	-1.13199	-1.2565	-1.2023
2610528E23Rik	0.223388	-1.16461	-1.16461	0.358121	0.771684	1.63758	1.01474	0.382999	1.95057	1.62069	-0.285461	-0.0288588	-0.596089	-0.873965	-0.333675	0.328419	-0.760506	-0.827898	-1.0879	-1.16461
2700023E23Rik	-0.391681	-1.10167	-0.906665	-0.0768015	-0.023642	1.48171	-0.685566	-0.650459	1.1861	2.01638	0.734039	0.887255	1.8433	-0.794121	0.0803682	-0.465107	-1.01555	-0.42251	-0.75012	-0.945253
2700029M09Rik	1.86665	-1.14108	-1.07517	-0.824021	-0.382599	1.59994	1.93583	-0.353967	0.600888	0.203704	-0.21216	-0.561015	-0.630271	-0.737563	0.226239	0.700025	0.396955	0.756832	-1.08988	-1.27933
2700038G22Rik	-0.511487	-1.36357	-1.14395	0.230336	-0.956519	1.21781	1.18313	-0.0125033	1.06564	1.17588	0.705094	0.0772536	1.91606	-0.748739	0.169354	0.650361	-0.441729	-0.570177	-1.27867	-1.36357
2700049A03Rik	-0.0521681	-1.11785	-0.0887824	-1.19008	0.232404	0.719833	3.60671	0.166175	0.117625	0.384152	-0.120306	-0.291381	0.193294	-0.561343	0.511297	-0.297528	-0.163673	-0.242601	-0.768436	-1.03733
2700050L05Rik	0.549603	-1.517	-0.975164	0.520279	1.40332	2.06176	1.33548	-1.02829	-0.345386	0.0304969	0.510512	0.150871	-0.121781	-0.735272	-0.31876	-0.0894977	1.2286	-0.178849	-0.778749	-1.70217
2700060E02Rik	-0.605188	-1.59228	-1.54416	0.0426157	1.6986	1.27954	0.580224	-0.178039	0.0276849	0.911034	0.930099	0.224662	0.110828	0.549478	1.08212	0.411551	0.095519	-1.25013	-1.37139	-1.40277
2700062C07Rik	-0.463346	-1.19213	-1.41454	2.13722	0.478329	1.2427	1.11254	-0.780494	-0.134707	-0.183447	1.10587	0.522636	0.176002	-0.305841	1.0098	0.210086	0.108216	-1.07047	-1.34573	-1.21269
2700078E11Rik	-1.097	-1.9642	-1.68579	-0.320298	0.541666	1.0647	-0.193909	1.74454	0.432572	0.484318	0.601689	1.01911	-0.189391	1.07632	0.769494	0.135407	0.393773	-1.007	-1.07472	-0.731287
2700089E24Rik	-0.758338	-0.928635	-1.10095	1.70682	2.77847	0.0713564	-0.776803	-0.458853	0.187063	0.826115	1.03961	0.292848	-0.143853	-0.176394	0.274174	0.313099	-0.419925	-0.611534	-1.01334	-1.10095
2700094K13Rik	-0.564363	-1.06027	-1.08368	-0.690047	-0.33143	1.64894	2.29916	0.175745	1.00381	0.288447	-0.550002	-0.379509	-0.453106	-0.538293	0.644421	0.949948	1.30661	-0.422645	-1.05947	-1.18426
2700097O09Rik	1.7332	0.429747	3.60594	0.277153	-0.31519	-0.244606	-0.452687	0.0458448	-0.160145	-0.313322	-0.302787	-0.36375	-0.271071	-0.470714	-0.557145	-0.478499	-0.488669	-0.474431	-0.580523	-0.618352
2700099C18Rik	0.473125	-0.837203	-0.825173	-0.701194	-0.632227	0.0138254	2.20019	0.369901	-0.242381	-0.311187	-0.0914472	-0.818175	-0.337529	-0.839398	2.26194	0.00996375	1.64412	0.540052	-0.938603	-0.938603
2810001G20Rik	0.153092	-1.40205	-0.24237	-0.575125	0.57574	0.449104	-1.13807	0.726005	-0.128461	1.02758	1.60398	1.90996	-1.16476	-0.596809	-0.674846	-0.567539	-0.92471	-0.113984	1.77199	-0.688729
2810002D19Rik	-0.969774	-1.30761	-1.03939	-0.27838	3.01515	0.988624	1.35617	0.502541	-0.487408	-0.0227699	0.411628	-0.322824	-0.657739	-0.0809112	0.613545	-0.296215	-0.734089	-0.883355	-0.276905	0.469712
2810002N01Rik	-0.841532	-1.60823	-1.67205	-0.695114	1.08568	1.34804	0.427311	-0.129857	0.697729	0.729891	0.507938	-0.467033	0.539764	1.04982	1.08943	0.830205	0.545535	-0.768414	-1.24594	-1.42318
2810004N23Rik	0.243076	-1.41471	-1.28767	-0.358357	0.66989	1.28677	-0.376	-0.0821779	2.41032	1.13836	0.250624	0.758426	0.63727	-0.371695	-0.210706	0.403779	-0.2979	-0.600417	-1.25978	-1.5391
2810006K23Rik	-0.415649	-1.41394	-1.52414	-0.452792	1.33725	0.658566	1.90936	-0.608904	0.715056	1.57092	0.186492	0.910324	-0.00636249	-0.519958	0.0781295	-0.0319687	0.68395	-0.57207	-1.17871	-1.32556
2810008D09Rik	-0.0661577	-1.10949	-1.46562	-0.132654	-0.457989	0.275085	0.190272	0.0598366	0.358596	2.06789	1.88787	0.461763	0.198491	0.00244498	1.41589	0.514698	-0.967929	-0.622971	-1.14442	-1.46562
2810008M24Rik	-0.0659373	-1.97313	-1.81723	-0.501041	0.891788	0.728999	1.65631	0.716057	-0.801662	0.378696	1.74231	0.326395	0.04516	0.0241547	0.679867	0.71955	-0.530128	-0.596451	-1.03593	-0.587776
2810013P06Rik	-0.525046	-1.48011	0.017496	-0.477342	0.751668	0.358141	0.773281	-1.17353	-0.918526	0.564727	1.84068	-0.150813	0.534345	1.43241	1.46645	0.24107	0.360994	-1.30635	-1.07162	-1.23792
2810021B07Rik	-0.15096	-1.59364	-1.63072	0.223689	1.60215	0.785966	1.07977	2.22343	0.324225	0.866601	0.210397	-0.415655	-0.260727	-0.239546	-0.0911874	0.179623	-0.116206	-0.681304	-1.02451	-1.29139
2810025M15Rik	-0.634624	-0.680207	-0.754781	-0.650674	3.43914	0.839067	-0.0411492	0.155699	0.239976	1.26342	0.472146	-0.678285	-0.517366	-0.53512	0.152383	0.0328892	0.117732	-0.660146	-0.747735	-0.812369
2810046L04Rik	-0.388373	-1.13128	-1.28208	-1.28208	1.42362	1.82201	2.08338	1.51768	-0.217643	0.165884	0.0881307	-0.305	-0.359513	0.391887	-0.12827	-0.14087	0.0160255	-0.664816	-0.63019	-0.978504
2810403A07Rik	-0.401758	-1.55035	-1.62592	-0.753439	1.97647	2.01111	-0.0579694	-0.817892	-0.30319	1.21009	0.0325629	-0.196102	0.984156	-0.116969	1.0179	-0.307743	-0.311345	-0.714792	-0.412204	0.337379
2810405K02Rik	-0.699406	1.0521	-0.776785	0.411308	-0.534262	-0.696085	-0.973143	-0.788809	-0.0209087	-0.189518	-0.222096	-0.300744	-0.430591	2.29886	-0.226678	1.98587	1.88105	-0.530526	-0.796837	-0.442794
2810407C02Rik	-0.645935	-1.67334	-0.831775	1.54149	-0.108721	0.0379547	1.12054	-0.0741717	-0.0757374	-0.638119	2.71562	-0.707733	-0.231227	0.753137	0.727321	0.0346763	0.363394	-0.525959	-0.943315	-0.838112
2810408I11Rik	0.88822	-0.632182	-0.833308	-0.698998	-0.833308	0.167678	0.386427	-0.142678	2.64491	0.081966	-0.80401	-0.412891	-0.656847	-0.730133	-0.0623527	0.736117	-0.279086	2.36967	-0.538135	-0.651065
2810408M09Rik	-0.691533	-1.22616	-1.22616	-0.978013	1.97658	1.18697	0.470378	-0.0760809	0.140561	1.21458	1.46734	0.912834	0.388984	0.00866562	0.484499	-0.0594649	-0.707979	-0.933964	-1.12586	-1.22616
2810417H13Rik	0.252958	-0.747238	-0.724933	-0.642915	-0.715421	1.78659	2.87966	-0.19089	-0.0340986	-0.21888	-0.755807	-0.690963	-0.692494	-0.757293	0.608255	0.408812	1.00218	0.749951	-0.750852	-0.766621
2810422J05Rik	-0.816584	-1.42872	-1.29804	-0.869494	-0.335538	-0.0391253	-0.356637	1.03615	0.17871	0.755479	0.580026	0.486833	0.720319	1.70209	1.80609	0.42698	0.818355	-0.952353	-1.14361	-1.27092
2810428I15Rik	-0.344248	-1.8456	-1.29712	1.38211	-0.304679	0.120858	0.689425	0.731092	0.737679	0.613908	-0.297975	-0.240376	-0.284697	0.555586	0.407955	1.37544	1.50161	-0.465929	-1.22426	-1.81077
2810432D09Rik	0.33074	-1.5189	-1.28898	-0.189294	1.40507	1.70802	2.4045	0.0957144	-0.0656964	0.0915478	0.471646	-0.897629	-0.688574	0.0750096	0.404908	0.216499	0.0463834	-0.53677	-0.871296	-1.19291
2810442I21Rik	0.207427	-0.330484	-0.212862	-0.330484	-0.330484	-0.213588	-0.119789	-0.00692881	-0.29413	-0.282428	4.20634	-0.330484	-0.330484	-0.330484	-0.257646	-0.313282	-0.0977265	-0.213776	-0.330484	-0.0882162
2810453I06Rik	0.0618092	3.44867	2.25962	-0.338987	-0.341912	-0.3302	-0.367891	-0.265387	-0.350491	-0.276745	-0.306889	-0.253312	-0.279666	-0.357063	-0.371252	-0.344547	-0.364996	-0.396917	-0.402224	-0.421622
2810454H06Rik	0.974139	-0.792106	3.41943	-0.612828	1.20694	0.132136	0.877361	0.323937	-0.55236	-0.319052	-0.188087	-0.251935	-0.290363	-0.45263	-0.301047	-0.498229	-0.467631	-0.596112	-0.793887	-0.817683
2810474O19Rik	1.02714	-1.40428	2.48319	-0.597586	-0.145089	-0.242762	0.11388	-0.424911	-1.3227	-0.240583	-0.0921357	0.750991	0.307787	0.0201636	-0.336709	-0.522624	-0.110281	-1.09506	-0.393008	2.22458
2900008C10Rik	-0.861944	-0.774965	-0.674321	-0.559526	0.938083	-0.343251	-0.518538	3.39291	-0.188868	-0.18626	1.40361	0.715971	0.306123	-0.526492	-0.187303	-0.322543	-0.674814	-0.317966	0.0763176	-0.696225
2900010M23Rik	-0.124998	-1.54258	-1.59057	1.49857	0.205241	0.93164	0.301955	-0.2884	0.752198	1.0242	0.347817	-0.0151847	-0.310407	0.252635	0.20226	1.53271	0.911763	-1.17383	-1.44007	-1.47497
2900026A02Rik	-0.288012	-0.330215	-0.330215	-0.330215	4.14389	0.553719	-0.151704	-0.330215	-0.330215	0.20757	-0.246131	-0.161138	-0.188308	-0.289365	-0.293748	-0.330215	-0.330215	-0.330215	-0.314837	-0.330215
2900053A13Rik	-0.602502	-1.96235	-0.657767	0.397482	-0.0778989	-0.745734	-0.593017	0.206681	0.118455	-0.869424	0.905048	-1.0008	-0.0737431	0.00785225	0.463591	-0.0507509	0.450857	-0.101023	1.23971	2.94533
2900060B14Rik	-1.04417	-1.23558	-1.18061	0.462643	2.44879	1.75108	1.13898	0.146901	-0.136118	-0.293206	-0.383628	0.716523	0.905219	-0.427167	0.23314	-0.385659	-1.01624	-0.194174	-0.423334	-1.08339
2900064A13Rik	-0.147116	-1.63372	-1.44927	2.6245	0.0575422	-0.34155	0.0401147	0.847683	0.526169	-0.0464342	0.0772004	-0.517722	-0.721937	0.552658	0.249278	0.976531	1.37545	-0.495753	-0.995314	-0.978322
2900092E17Rik	-0.48664	-1.57444	-1.62599	-1.18957	-0.253441	0.869833	2.15594	0.855143	0.000742736	0.371707	0.828187	-0.573311	-0.0594717	-0.175976	0.173269	0.383914	1.65409	0.466797	-1.06698	-0.753811
2900097C17Rik	-0.724825	-1.5642	-1.52662	-0.375374	0.497893	0.673472	0.358094	-0.160044	1.41398	1.66187	1.23449	-0.174882	-0.920863	0.939575	1.01562	0.572118	0.0475837	-0.776274	-0.715424	-1.47619
3010026O09Rik	0.717887	-1.04436	-0.539275	-1.26519	-0.0341221	1.48083	2.20219	-0.828463	1.13441	0.723174	-0.623293	-0.0136943	-1.18078	-0.788158	0.514127	0.669673	0.944348	-0.0994396	-1.02845	-0.941418
3110001D03Rik	-0.970966	-1.53265	-1.65864	1.34267	0.547871	0.408206	-0.333702	-0.648019	0.660706	1.22773	0.805091	0.504922	0.462016	0.580025	0.862653	1.12511	0.31723	-1.05687	-1.18384	-1.45955
3110002H16Rik	0.234146	1.37731	3.48575	0.920987	-0.518538	-0.804784	-0.341749	0.0498336	-0.744844	-0.403216	-0.334813	-0.308103	0.13142	-0.277623	-0.460755	-0.611106	-0.76199	-0.681502	-0.401169	0.450744
3110003A17Rik	-1.84821	-1.80707	-2.05257	-0.108866	-0.0864329	0.145986	-0.281274	0.0180743	0.926337	0.844387	0.26554	-0.408333	-0.589342	0.854783	0.40822	1.66237	0.491167	0.929143	0.974628	-0.338544
3110009E18Rik	-0.982593	-1.32191	-1.12722	0.187896	1.17082	0.748655	1.7504	1.24219	-0.41907	0.820472	0.432156	1.23976	-0.165065	-0.00798397	-0.479933	-0.296544	0.937044	-1.23547	-1.17171	-1.32191
3110040N11Rik	-0.587087	-1.8991	-1.74585	0.925783	0.508336	1.01633	-0.11188	-0.038242	0.733755	1.15083	1.44999	0.526624	0.942363	-0.177923	0.648834	0.0827055	-0.00722583	-0.654033	-1.38067	-1.38353
3110043O21Rik	-0.357626	-0.669949	-0.895977	2.95794	0.200593	-0.616937	0.108008	-0.895977	-0.827665	-0.0466968	-0.549728	-0.895977	-0.465662	0.777345	1.67933	-0.119847	1.3511	-0.467987	-0.365115	0.100821
3110052M02Rik	-1.03662	-1.19313	-1.19313	-0.708559	1.38965	0.555644	2.55586	1.02384	-0.255763	0.0355227	1.30176	-0.120931	-0.0532804	0.114533	0.83145	-0.513818	-0.399008	-0.902053	-0.644091	-0.787881
3110056K07Rik	-0.886679	-0.940666	-0.903353	-0.403034	1.98166	0.640731	-0.350037	2.15516	-0.37798	0.805527	0.436308	-0.483494	1.81341	-0.528881	0.287052	-0.389503	-0.347608	-0.913499	-0.795519	-0.799602
3110056O03Rik	2.57414	-0.401202	3.20045	-0.400735	-0.379739	-0.360357	-0.334776	-0.149705	-0.194547	-0.151958	-0.00963218	-0.376376	-0.237412	-0.266869	-0.352398	-0.341514	-0.407267	-0.448116	-0.468417	-0.493574
3110062M04Rik	-0.862617	-0.86628	-1.16755	-0.170742	2.42771	-0.0753553	-0.853385	0.744707	-0.534296	1.40101	1.05974	-0.721653	-0.391001	-0.389635	-0.49531	-0.357822	-0.77875	0.0337519	1.93631	0.0611662
3110082I17Rik	0.240811	-0.951757	-0.951757	0.122671	-0.6409	1.41764	-0.800817	-0.44194	1.981	1.22172	-0.28182	-0.694483	-0.891839	2.26482	-0.223835	0.654943	0.0717763	-0.703488	-0.749925	-0.642828
3200002M19Rik	0.425954	-1.54494	-1.13339	-0.418523	-0.363462	1.28954	1.85628	-0.196066	0.595912	-0.0148148	-0.817088	-0.771087	-0.0536852	-0.686052	0.982356	1.24018	1.49203	0.423269	-1.0238	-1.28262
3230401D17Rik	-1.08083	-1.85416	-1.32939	0.0465206	0.297296	1.52089	1.09623	0.56633	0.224952	0.877331	0.450385	-0.628038	-0.799737	-0.445783	0.988185	1.53773	0.741271	-0.0727713	-1.43331	-0.703101
3830406C13Rik	-0.621991	-1.51009	-1.7441	0.707241	1.18925	-0.392025	-0.44427	0.386526	0.365973	0.968565	1.59217	0.243362	-0.558989	1.04553	1.06071	0.677107	0.419648	-1.02899	-0.852992	-1.50263
4632411B12Rik	-0.129536	-1.452	-1.36725	0.897466	2.70401	1.05202	0.639954	0.0249934	-0.287003	0.0978768	0.372114	0.787152	-0.00434027	0.174678	-0.198234	0.446882	-0.4361	-0.708093	-1.04054	-1.57406
4632415L05Rik	-0.895139	0.0454331	-0.797269	-1.13701	-0.488511	2.24677	2.37554	-0.0362904	0.30829	1.39811	0.174162	-0.413453	0.384474	0.282051	-0.2036	-0.000114303	-0.528218	-0.783048	-0.795159	-1.13701
4632428N05Rik	-0.742224	-0.725189	-0.676552	-0.071144	-0.758518	-0.922496	-0.917489	-0.353728	-0.272418	-0.796912	-0.370941	-0.295536	-0.606361	1.73335	-0.228909	0.41815	0.951275	0.535124	1.36648	2.73404
4632434I11Rik	3.19393	-0.689296	-0.0546685	-0.83056	-0.43951	0.275251	1.47454	-0.178425	0.131007	-0.0491823	-0.83056	-0.684469	-0.83056	-0.788479	0.530221	-0.0801842	0.994922	0.413367	-0.726789	-0.83056
4732418C07Rik	-0.0139684	-1.90504	-1.16909	1.2139	1.12168	0.860483	0.166338	0.00197705	-0.327526	0.950488	2.61405	0.323114	-0.750633	-0.553387	0.0396099	-0.785292	-0.693278	-0.513987	-0.0113134	-0.568119
4833420G17Rik	0.316474	-0.962506	0.664784	-1.37569	2.55106	1.43013	1.5936	-0.426053	-0.66159	0.775573	0.275955	-0.41982	-0.29851	-0.205214	-0.458616	-0.0531412	0.0939469	-0.974754	-1.0542	-0.811436
4833439L19Rik	-0.326618	-1.14729	-0.99123	-0.505801	1.00174	1.35106	2.83476	-0.60809	-0.0456813	0.108099	0.440273	-1.42094	0.0793996	0.663141	0.45161	0.340882	0.231217	-0.655664	-0.95688	-0.843983
4833442J19Rik	-0.369083	-0.427892	3.2796	-0.836227	0.308043	0.480311	-0.552524	-0.300827	-0.134573	0.971752	-0.696613	1.70693	-0.108728	0.101196	-0.346714	-0.43134	-0.509538	-0.565364	-0.732184	-0.836227
4921513D23Rik	0.105021	-1.34263	1.35283	-0.56965	1.66226	1.03635	0.746248	0.627608	-0.720203	0.33073	0.863896	-0.0340702	1.30972	-0.856242	0.177408	-0.688224	0.0708509	-1.31412	-0.943062	-1.81473
4921524J17Rik	-0.464349	-1.12979	-1.01245	-0.40716	2.86874	0.845137	2.04519	0.758862	0.0619517	0.692093	-0.351912	-0.353671	-0.448202	-0.403851	-0.145161	-0.369284	-0.252164	-0.461725	-0.756703	-0.715544
4921531C22Rik	-0.999341	-1.27247	-0.941431	1.11946	2.38272	0.638338	1.08871	-0.0547929	-0.692164	0.641091	1.41899	-0.00487195	0.473588	-0.734108	0.671483	-0.58421	-0.921067	-0.748284	-0.788566	-0.693088
4922501C03Rik	0.353702	-1.45834	-1.65046	0.1373	-0.530272	0.49816	0.725122	-1.47883	0.0775798	0.98014	0.96356	1.19404	1.24069	0.309028	1.14191	-0.0853803	0.655639	-0.243552	-1.45086	-1.37917
4930420K17Rik	-0.901058	-0.791862	-0.888143	-0.0918067	0.512893	1.40855	1.24277	-0.882793	-0.824837	-0.701465	-0.521471	0.64951	3.00904	0.168305	-0.00722875	-0.166754	-0.119766	-0.90054	-0.528073	0.334726
4930422G04Rik	2.22392	-1.02235	-0.664199	-0.120509	-0.442415	1.20194	2.50638	-0.361371	-0.0266391	0.644527	-0.803371	-0.418621	-0.0893174	-0.928919	0.378129	0.259797	-0.30288	0.0105847	-1.02235	-1.02235
4930427A07Rik	0.432679	-0.972757	-0.972757	-0.422952	-0.972757	2.21179	1.98574	1.25464	-0.110466	0.0392193	-0.851971	-0.620971	-0.629211	-0.838608	1.17644	0.0413844	0.781545	-0.00540666	-0.787595	-0.73798
4930430F08Rik	3.5996	-0.417535	1.96948	-0.50353	-0.50353	-0.308466	-0.158857	-0.405597	-0.202374	0.0536451	-0.207983	-0.097789	-0.252244	-0.32984	-0.179665	-0.349432	-0.2401	-0.486336	-0.475923	-0.50353
4930453N24Rik	0.398482	-1.37178	-1.58038	-0.169455	1.01022	0.75604	1.94731	0.252937	-0.177656	0.225141	-0.269	2.31334	-0.55708	0.258988	-0.0354257	-0.0907449	0.0431939	-0.721001	-0.920613	-1.31251
4930455C21Rik	0.0698252	-1.56798	-1.89934	0.201939	1.57911	0.204252	0.529654	0.403906	0.77118	0.126929	0.140116	-0.902942	0.605977	0.0266962	0.945889	0.63818	1.16945	0.234546	-1.65261	-1.62477
4930455F23Rik	-0.55979	-1.03136	-1.03136	0.13898	2.80685	0.54612	0.0628016	0.898478	0.481452	1.89127	0.675532	-0.209288	-0.802409	-0.601915	-0.125834	-0.285881	-0.568691	-0.547135	-0.811127	-0.92669
4930471M23Rik	0.00170111	-0.870257	-0.536912	0.427248	-0.542236	-0.55375	-0.154157	0.0222459	-0.307023	-0.697456	0.219978	-1.00348	-0.685882	1.79673	0.726938	1.45618	2.77192	-0.843478	-0.530721	-0.697587
4930481A15Rik	0.473365	-1.38888	-0.220759	3.62322	0.708359	0.130085	0.38606	-0.0691151	-0.588604	0.101513	-0.0373347	0.476039	-0.232392	-0.310754	-0.199479	-0.751724	-0.434359	-1.07361	-0.0298821	-0.561756
4930486L24Rik	-0.288573	-0.288573	-0.288573	-0.288573	-0.288573	-0.0366037	-0.288573	-0.288573	0.0208496	0.42501	-0.288573	4.18317	-0.288573	-0.288573	-0.288573	-0.288573	-0.288573	-0.263827	-0.288573	-0.288573
4930506M07Rik	-0.436009	-0.134188	-0.436009	-0.436009	-0.436009	-0.436009	-0.436009	-0.436009	-0.40792	-0.175702	0.00846111	-0.300281	-0.436009	1.23774	3.86354	0.412725	0.20797	-0.406903	-0.381362	-0.436009
4930523C07Rik	-0.630865	-0.910709	-0.890528	-0.0784074	-0.548837	1.54235	3.10419	-0.663982	-0.294092	-0.765245	-0.70836	0.613588	1.4751	-0.384164	-0.132866	-0.391746	-0.000504913	-0.045405	-0.397282	0.107765
4930526I15Rik	-1.31263	-1.22418	-1.56292	-1.31205	-0.877764	0.13202	0.567807	1.34593	-0.409469	1.48729	0.0846742	0.467171	1.39949	0.915767	1.23777	0.378416	0.59044	-0.57776	-0.510308	-0.819692
4930534B04Rik	1.28766	-0.963401	-0.395698	-0.866865	-0.691632	0.218698	2.50935	-0.339648	1.63493	0.728202	-0.36345	-0.966085	-0.876548	-0.595246	0.574137	0.229003	0.546364	0.441608	-0.866729	-1.24466
4930547N16Rik	2.50149	-0.75599	-0.229955	-0.75599	-0.75599	0.482678	2.08171	-0.206774	-0.261712	-0.348815	-0.710654	-0.716343	-0.75599	-0.726473	1.40385	-0.0359842	1.01807	0.192889	-0.664031	-0.75599
4930572J05Rik	0.445532	-0.829795	-0.80738	-0.0425109	-0.480371	0.581944	0.0708005	-0.581218	-0.302681	-0.0832704	3.08734	0.33636	1.3147	-0.515919	1.41969	-0.450687	-0.531685	-0.857407	-0.886725	-0.886725
4930579G24Rik	1.15126	-0.808974	-0.869096	-0.480694	-0.431921	1.28827	3.20113	-0.167585	0.241344	0.18531	-0.726353	-0.511569	-0.741276	-0.689285	-0.0554176	0.122163	0.510107	0.500955	-0.849272	-0.869096
4931406C07Rik	-0.830348	-0.727115	-0.812892	-0.431262	1.31407	-0.382947	-0.74249	-0.178077	0.11379	2.37489	2.69662	-0.715354	-0.530329	0.142798	0.177602	-0.282775	-0.389043	-0.582043	-0.348031	0.132936
4931406P16Rik	0.507269	-0.920637	3.32316	-0.728097	0.884744	0.0804803	1.09156	0.19364	-0.837615	0.637858	0.030627	-0.0715921	0.256545	-0.244583	-0.616864	-0.787312	-0.448734	-0.867072	-0.672997	-0.810378
4931440P22Rik	-1.26869	-1.28897	-0.995672	1.78121	0.994757	0.503322	0.626239	-0.424749	-0.792227	0.625663	1.51028	-0.326135	1.06586	0.100568	1.32522	-0.0720915	-0.187013	-1.05184	-1.19471	-0.931019
4932438A13Rik	-0.802501	-1.59064	-1.71251	-1.28516	2.35048	0.435911	0.236213	0.489062	-0.648898	0.218715	0.423389	1.15115	1.00361	-0.518634	0.349175	-0.920395	-0.142581	-0.352641	0.691619	0.624632
4933403F05Rik	0.0841572	-1.33215	-0.315858	-0.359737	0.887708	0.956222	-0.491259	0.83359	1.894	2.3098	0.567297	-0.321941	-0.547057	-0.65412	-0.508072	0.29198	-0.938702	0.0408104	-0.900598	-1.49607
4933407C03Rik	0.359382	-2.11971	-1.64362	-1.15975	1.33056	-0.37424	0.182079	0.140967	-0.992911	0.301817	0.155278	0.259335	-0.856014	1.48551	0.056855	-0.094259	1.4154	-0.416494	0.729144	1.24066
4933407H18Rik	0.406966	-1.03118	-0.954504	2.98295	-0.0452964	-0.422913	-0.348244	0.491967	-0.355932	-0.239336	2.21235	-0.586942	0.336418	-0.077473	0.452515	-0.566819	-0.364756	-0.507461	-0.734	-0.648298
4933408B17Rik	-0.438804	-0.311606	-0.275334	-0.494427	-0.494427	-0.37473	-0.0802636	-0.265536	-0.373306	-0.44586	-0.439304	-0.197663	-0.219316	-0.343402	-0.208563	-0.424493	-0.323747	-0.0819144	2.69742	3.09528
4933411K20Rik	-0.618562	-1.18612	-1.18612	-1.18612	2.71523	0.256178	0.509915	0.90825	-0.234977	1.16109	0.544045	0.306385	1.05319	-0.228439	0.540235	-0.327892	-0.653421	-0.427071	-0.879778	-1.06602
4933412E12Rik	-0.449998	-0.466052	-0.466052	-0.218964	4.09996	0.20041	0.570993	-0.34219	-0.387669	0.0376607	-0.0885784	-0.114525	-0.302255	-0.0278247	-0.250442	-0.27712	-0.214603	-0.466052	-0.370651	-0.466052
4933421E11Rik	-1.48398	-1.98184	-1.98184	-0.0967437	0.841276	0.474676	1.13056	0.918116	0.00932847	0.0274432	0.471609	0.894441	1.70609	-0.202881	0.13074	-1.03279	0.200087	0.489909	0.194404	-0.708606
4933421O10Rik	-0.348351	-0.501626	-0.501626	4.10694	0.652661	-0.0903727	-0.260662	-0.404352	-0.30478	-0.141291	-0.129063	-0.115124	-0.260533	-0.14104	0.104749	-0.285399	-0.168829	-0.410602	-0.366683	-0.434011
4933424B01Rik	1.15763	-1.36427	1.33268	-0.109736	1.58263	0.938333	1.85708	-0.768332	-0.327187	0.218039	1.00265	-1.02741	-0.743755	-1.04739	0.304442	-0.0541821	-0.92487	-0.383695	-0.451702	-1.19096
4933426M11Rik	-0.319082	-1.30579	-0.657293	0.542737	-1.45669	-1.31038	-1.11103	0.324512	-0.761021	0.419799	0.601027	0.132396	-0.326591	2.40756	0.150393	0.551911	0.0599226	-0.193137	0.303939	1.94682
4933433P14Rik	-1.54371	-1.82505	-2.0848	0.326118	0.384406	-0.494224	-0.777026	1.89861	-0.283343	0.484761	0.866275	0.278943	0.53815	0.394612	0.129655	0.137722	-0.0855439	-0.219505	0.305755	1.5682
4933434E20Rik	-0.531056	-1.37242	-1.22709	1.73148	2.8772	-0.259123	-0.0709702	0.862468	0.1031	0.0814762	0.537235	-0.217157	0.35157	-0.00760901	0.294812	-0.12308	-0.322146	-0.736816	-0.803231	-1.16864
4933439C10Rik	-0.597074	-0.553674	-0.597074	-0.597074	3.59571	0.514407	1.57025	-0.157337	-0.319021	-0.0781831	0.356513	-0.201009	0.300794	-0.485492	-0.299416	-0.356443	-0.40102	-0.520588	-0.577196	-0.597074
4933439F18Rik	0.47798	-1.41573	-1.32446	1.22553	1.00759	0.683835	-0.635605	1.64191	0.860751	1.27021	1.00737	-0.229932	0.0201833	-0.613686	0.0229046	0.188408	-1.09245	-0.346605	-1.33247	-1.41573
5031414D18Rik	-0.691743	-0.670273	-0.732048	-0.263833	-0.0953975	-0.1189	0.311873	-0.510904	-0.660979	0.0366894	3.01386	-0.732048	2.16385	-0.290225	1.19117	-0.276161	-0.364471	-0.480932	-0.244642	-0.584885
5031425E22Rik	-0.95639	-1.45921	-0.706869	0.299156	1.4237	-0.00286745	0.249205	3.21897	-0.374186	0.601027	0.337661	0.243945	-0.403234	-0.00575119	0.238614	0.00467224	-0.373019	-0.979831	-0.720701	-0.634887
5031439G07Rik	-1.07267	-0.778235	-0.92396	-0.072946	0.149181	-0.17701	0.0343057	-1.15914	-0.721241	0.0437921	0.944123	-0.716635	-0.501556	0.896692	2.14142	0.997541	2.32266	-0.769156	-0.660325	0.0231503
5033406O09Rik	-0.19824	0.781646	0.274583	-0.712262	0.478152	-0.293771	-0.659885	0.699512	0.22806	3.69199	0.332213	-0.493523	-0.712262	-0.546354	-0.230999	-0.125136	-0.472793	-0.697353	-0.631322	-0.712262
5033414D02Rik	-0.640168	-1.12684	-1.2623	0.52925	1.59479	0.26503	0.282018	2.95317	0.118168	0.37713	0.450946	-0.503115	0.769838	-0.363255	-0.413112	-0.140891	-0.22308	-0.656819	-0.973473	-1.03729
5133401N09Rik	-1.21173	-1.50832	-1.40398	0.260263	2.17843	0.481556	0.432695	-0.0232056	-0.0944129	-0.32334	0.698787	2.09855	-0.538197	1.03088	-0.380493	-0.010411	0.305411	-0.826291	-0.799453	-0.366745
5430411K18Rik	-0.530077	-0.983579	-0.964073	-1.20026	1.92684	0.911485	2.89745	0.00681258	-0.74339	0.240578	0.281446	-0.689772	-0.130973	-0.353143	0.769114	-0.343137	-0.0713752	-0.394694	-0.131204	-0.498044
5430416N02Rik	-0.829093	-1.1105	-1.1105	1.27162	2.05064	0.496609	1.13225	-0.750522	0.706996	1.84299	-0.445187	0.164145	-0.577114	-0.21635	0.597397	0.0919672	-0.38009	-0.805538	-1.01923	-1.1105
5430417L22Rik	-0.516756	-0.795523	-0.706083	-0.795523	3.07013	0.477345	0.0958986	0.135546	0.0492919	0.610287	2.21437	-0.42426	-0.462742	-0.486923	0.1201	-0.446938	-0.554182	-0.413469	-0.566366	-0.604194
5430421N21Rik	-0.407802	-0.36754	-0.366111	-0.312866	-0.453051	-0.412946	-0.425308	-0.274701	-0.416447	-0.311639	-0.358518	-0.224181	-0.210942	-0.371573	-0.365125	-0.439117	-0.412807	0.375161	2.84316	2.91236
5430427O19Rik	-1.27622	-1.30407	-1.35586	0.817854	0.386219	-0.213377	0.151441	0.0219983	-0.63664	0.414717	1.89816	-0.729951	1.17528	0.974936	1.48742	-0.357825	-0.0571481	-1.23574	-1.08474	0.923545
5430435G22Rik	-0.476196	-0.418246	-0.492797	-0.492797	-0.492797	-0.492797	-0.492797	-0.492797	0.874546	-0.00325607	-0.355171	-0.359819	-0.492797	0.813229	3.73942	0.705976	0.307737	-0.393048	-0.492797	-0.492797
5430437P03Rik	-0.287878	-1.7337	-1.59192	0.290183	1.09076	0.386433	1.82907	-0.0579734	0.419698	0.0617506	-0.030967	-0.667549	-0.200657	0.00888977	0.327656	0.927015	1.89997	-0.112217	-1.08449	-1.47407
5530601H04Rik	0.731244	-0.924554	-0.608503	-1.52433	2.51523	0.491259	2.01804	-0.688558	-0.395776	0.50474	-0.270504	-0.345232	-0.389826	0.668894	0.866099	-0.0306862	-0.377004	-0.600703	-0.837136	-0.802697
5730403B10Rik	-0.580085	-0.719433	-0.607481	0.0134907	0.526882	0.769318	1.42917	-0.426625	-0.411512	0.0259924	3.5288	-0.432549	-0.202985	-0.348597	0.189252	-0.390716	-0.305362	-0.582176	-0.711055	-0.764327
5730419I09Rik	0.456145	-1.14227	0.0206492	-0.67268	0.035169	1.13408	3.16472	-0.474647	0.405954	-0.146837	0.0263899	-0.847154	-1.0684	-0.480668	-0.107197	0.506234	1.16912	-0.227716	-0.944802	-0.806089
5730437N04Rik	-1.09879	-1.48492	-1.26667	0.676463	2.20694	0.828379	0.758124	0.0981791	0.260619	0.462488	1.33436	-0.289324	-0.725048	0.224348	0.779731	0.380435	0.224288	-0.928564	-1.12631	-1.31473
5730455O13Rik	-0.719103	-1.46969	-1.46969	0.0555392	1.77759	1.37987	1.32243	0.128928	0.869463	0.612671	0.358099	1.41984	-0.655913	-0.712895	-0.234344	-0.0303204	0.158044	-0.701686	-0.619148	-1.46969
5730455P16Rik	0.77213	-1.69521	-1.69521	-0.104632	0.231851	0.67261	2.18796	-0.518294	-0.541049	0.679393	1.07198	-0.0521258	0.208946	-0.202026	1.26197	0.0356311	0.669381	-0.759539	-1.1383	-1.08547
5730469M10Rik	0.0597856	3.4654	2.23621	-0.371494	-0.366352	-0.342375	-0.36861	-0.264221	-0.357393	-0.251678	-0.336364	-0.309121	-0.230509	-0.369654	-0.358641	-0.363662	-0.373387	-0.369731	-0.367201	-0.360998
5730494M16Rik	-0.617024	-1.29199	-1.36585	0.552196	1.99031	1.4571	2.15534	-0.30124	-0.0856575	0.0795199	0.921046	0.271466	-0.567708	-0.287075	0.0318888	0.0235664	-0.28313	-0.592788	-1.07122	-1.01875
5730494N06Rik	-0.667204	-1.84767	-1.39798	1.59127	0.154669	-0.833437	0.254696	-0.395734	0.0603791	0.992288	2.1774	0.634237	0.542344	0.399641	0.680579	-0.516479	0.563846	-0.576034	-0.686028	-1.13078
5730508B09Rik	3.64302	-0.774059	1.33339	-0.944793	-0.44599	-0.666018	-0.5227	-0.394233	-0.299312	-0.550987	0.13041	-0.319361	-0.546309	0.415095	-0.465917	0.0774042	0.285483	0.000534457	0.244731	-0.200391
5730528L13Rik	-0.721537	-0.646562	-0.528437	-0.721537	-0.469626	-0.709531	-0.695072	1.54969	2.30768	-0.0652995	-0.700119	-0.697625	-0.721537	0.375005	-0.632218	0.685863	0.258439	2.27345	0.46318	-0.604212
5730590G19Rik	1.17618	-0.864276	-0.864276	-0.3052	-0.864276	1.39929	2.70822	-0.262802	0.268958	-0.11201	-0.864276	-0.743709	-0.595252	-0.864276	1.09633	0.0937851	0.792863	0.464448	-0.795439	-0.864276
5830416P10Rik	-0.661816	-0.675088	-0.715607	3.15418	1.58493	-0.362951	0.200753	-0.28594	-0.605354	-0.603612	0.148983	0.928013	1.1464	-0.686541	-0.618159	-0.59602	-0.615923	-0.54066	-0.258359	0.0627661
5830417I10Rik	-0.450659	-1.40605	-1.13735	-0.466305	0.55961	0.874145	-0.408844	0.2267	-0.466046	0.919449	0.529607	-0.290519	3.26668	0.121181	0.253621	0.16285	-0.00424067	-0.758332	-0.950144	-0.57535
5830418K08Rik	1.26308	-1.21453	-1.36013	0.0141865	-0.529664	1.04131	2.32634	-0.269648	0.102681	0.136494	-0.488208	0.671488	-0.157348	-0.630405	0.747577	-0.42062	1.40406	-0.0393119	-1.23721	-1.36013
5830428M24Rik	-0.834746	-0.707668	-0.412126	2.57357	1.69253	-0.429185	-0.637971	-0.456691	-0.724196	-0.425011	1.07615	0.502325	1.67406	-0.806169	-0.0157203	-0.63112	-0.834746	-0.533661	0.409214	-0.47885
5830432E09Rik	-0.824599	-0.834386	-0.91628	0.62662	-0.395702	-0.748226	-0.91628	-0.91628	-0.222405	0.0319492	1.24332	0.313551	-0.212103	0.128802	-0.137803	-0.486348	-0.396188	-0.06337	1.78968	2.93605
5830433M19Rik	0.721716	-1.74743	-1.50732	-0.148385	0.913063	1.31084	2.36938	0.798813	0.0775245	0.19225	0.391635	-0.953148	-0.0930556	-0.384155	0.346988	0.0712784	0.2453	-0.249758	-1.02911	-1.32642
5930416I19Rik	1.06071	-1.08756	-1.04499	-0.471954	-0.521543	0.973291	2.51485	0.966697	-0.127492	-0.24237	0.379554	-0.585856	-0.49164	-0.965398	0.774202	-0.220605	1.21173	0.308103	-1.21791	-1.21182
5930434B04Rik	-0.801004	-1.29869	-1.36732	-0.657831	0.841776	1.28197	1.18089	0.0258143	-0.225745	0.865335	1.93991	0.12547	-0.332343	0.799021	1.3597	-0.171122	-0.581837	-0.795316	-0.935686	-1.25299
6030408B16Rik	-0.412015	-0.412015	-0.412015	-0.412015	3.02266	1.53378	2.19512	-0.412015	-0.401953	-0.412015	-0.412015	-0.344191	-0.412015	-0.369258	-0.412015	-0.39548	-0.380584	-0.412015	-0.412015	-0.327929
6030458C11Rik	3.51115	-0.947847	-0.485392	-1.04115	0.174712	0.434025	-0.0694814	0.645666	-0.0436371	0.505194	0.623781	0.414406	-0.575118	-0.0687433	-0.0797155	-0.00507663	-0.643565	-0.266921	-1.04115	-1.04115
6030468B19Rik	3.43208	-0.324967	2.31959	-0.324967	-0.324967	-0.324967	-0.324967	-0.324967	-0.317801	-0.324967	-0.324967	-0.324967	-0.324967	-0.324967	-0.285039	-0.324967	-0.324967	-0.292718	-0.306571	-0.324967
6230427J02Rik	1.03137	-0.688354	0.0397729	0.0833538	3.52803	0.360295	-0.305194	0.0848357	-0.123008	1.27638	-0.0909959	-0.490226	-0.571962	-0.604367	-0.311952	-0.523476	-0.620701	-0.676011	-0.676134	-0.721644
6330407A03Rik	-1.00281	-0.923874	-1.04458	-0.57147	-0.772759	0.262764	0.019312	-0.528656	-0.922571	-0.419974	1.22866	-0.863323	2.14595	2.21065	0.933603	0.364825	0.780598	-0.52678	-0.330821	-0.0387544
6330416G13Rik	-0.871534	-0.800382	-1.0147	0.601661	0.155272	-0.313997	-0.740358	-1.0147	-0.66813	1.2162	2.35586	-0.544699	-0.193758	0.518178	1.86528	1.06667	0.103043	-0.942393	-0.941638	0.164119
6330418K02Rik	-0.923903	-0.820017	-0.290549	-0.80442	-1.2536	-0.631096	-0.816796	-1.01195	0.241366	0.165996	0.685237	-0.633605	-1.03192	0.467142	0.870836	-0.250956	0.932563	1.21079	2.1705	1.72438
6330503K22Rik	3.31813	-0.703684	0.0757625	-0.703684	-0.0878967	0.630003	1.95188	-0.464959	-0.295417	0.0423862	-0.652608	-0.629193	-0.534282	-0.597356	0.0549919	-0.103805	-0.0977196	0.179059	-0.677923	-0.703684
6330578E17Rik	-0.562291	-1.25869	-1.69778	-0.432686	-0.516254	-0.481648	-0.795178	-0.808796	0.118837	0.860273	2.73535	-0.366188	0.409174	0.813766	1.33372	0.98706	0.154169	-0.48916	-0.1215	0.117829
6430527G18Rik	-0.708491	-0.708491	-0.708491	1.03478	1.23402	-0.224976	0.127506	-0.42634	-0.637546	-0.298881	-0.102019	3.39026	0.849755	0.0870805	0.139908	-0.563715	-0.446953	-0.657038	-0.671877	-0.708491
6430548M08Rik	-0.581093	-0.424983	-0.584733	-0.0379895	-0.651309	-0.584808	-0.651309	-0.4781	-0.614554	-0.62255	-0.548906	-0.651309	-0.244327	0.970494	-0.267571	-0.102717	0.0939456	0.789278	2.72258	2.46996
6530401N04Rik	0.155809	-1.50703	0.0916593	1.46633	0.0123254	-0.221919	-0.371623	0.676372	1.52961	1.79468	0.610753	-0.681533	-0.672065	-0.121954	0.957672	0.608502	-0.385718	-0.900453	-1.2341	-1.80733
6720456B07Rik	-1.16948	-1.79884	-1.51672	-1.07818	0.506356	-0.0782223	0.0395711	0.918252	-0.0975704	-0.18244	0.866742	-0.583806	-0.379288	1.53608	1.62481	1.03601	1.42396	-0.242754	-0.567555	-0.256924
6720456H20Rik	-0.58307	-0.981828	-1.43338	-0.531333	-1.43338	0.191512	-0.539255	-0.598266	1.66477	1.65028	2.23971	0.267218	-0.198628	0.780399	0.167006	-0.34714	0.494798	0.130366	-0.987729	0.0479496
6720463M24Rik	0.841255	-0.838197	-0.432133	-0.535845	-0.140363	0.933278	3.08275	-0.360669	0.251716	-0.00620574	-0.671334	-0.523256	-0.838197	-0.838197	0.393798	-0.495867	1.58806	0.265805	-0.838197	-0.838197
6820431F20Rik	-0.875163	-1.44161	-1.62451	-0.0412059	1.31914	0.42546	0.681637	-0.0282055	-0.333221	1.06604	1.78596	0.319135	1.84236	0.147579	0.397005	-0.227538	-0.764831	-0.794378	-0.804233	-1.04942
8430406I07Rik	-0.0830361	-1.44464	-1.44464	-1.44464	0.469718	-0.0913274	-0.0107511	-0.0765971	1.41657	2.19244	-0.781563	-0.0445187	0.215206	0.496796	0.907632	1.05367	0.719451	-0.00296953	-1.3636	-0.683206
8430410A17Rik	0.339832	-1.29398	-1.29398	0.240899	1.3508	1.28455	2.49536	0.979368	-0.259146	0.960959	-0.387792	-0.0748166	-0.188382	-1.00566	0.191165	-0.617326	-0.61437	-0.222101	-0.973063	-0.912307
8430410K20Rik	-0.968165	-0.772847	-1.19385	-0.351344	2.59427	0.0456886	-0.594544	2.00186	-0.278208	1.36714	0.191866	-0.425587	0.248091	-0.0832729	0.810524	0.0856453	-0.755202	-0.853439	-0.366127	-0.70249
8430419L09Rik	3.00949	-0.102076	2.68247	-0.51364	-0.0968552	-0.416346	-0.51364	-0.126975	-0.424064	-0.258936	0.388624	-0.220722	-0.397248	-0.413728	-0.138745	-0.414242	-0.51364	-0.50245	-0.51364	-0.51364
9030617O03Rik	-0.881695	-0.945242	-0.945242	-0.945242	-0.945242	-0.860715	-0.807531	0.974179	-0.355652	0.40563	1.02519	-0.499351	-0.683831	0.550035	1.18098	2.52389	1.29914	-0.375826	-0.250676	0.537195
9030619P08Rik	-0.354003	-0.228683	-0.191261	-0.432999	-0.432999	-0.432999	-0.432999	-0.432999	0.822548	3.94119	0.654425	-0.432999	-0.432999	-0.432999	0.0207839	-0.391636	-0.355085	0.28971	-0.311004	-0.432999
9030624J02Rik	-0.273647	-1.82644	-1.39502	0.216147	2.79485	0.581921	0.726714	-0.709445	0.117137	-0.0602624	-0.399607	-0.309549	0.0284928	0.0913339	0.999641	0.476516	1.09947	-0.625435	-1.02334	-0.509484
9030625A04Rik	-0.475651	-0.632285	-0.632285	-0.303782	0.0761481	-0.495268	0.13926	-0.632285	0.0696542	0.347007	3.28337	-0.568671	-0.632285	0.353049	2.08307	0.0371805	-0.233453	-0.549344	-0.601152	-0.632285
9130011J15Rik	0.0159879	-1.79202	-0.851147	2.41495	0.874102	-0.370202	0.00393891	1.77064	0.271248	-0.18763	0.809389	-1.45249	-0.535259	0.350688	0.0569989	0.450479	0.108811	-1.13649	-0.602714	-0.199274
9130206I24Rik	1.14803	-0.973473	-1.04257	-0.4742	1.81859	1.3418	1.36341	1.95188	-0.646974	0.217933	-0.872765	-0.661616	-1.00476	-0.461904	-0.15442	0.427495	-0.398205	0.0831332	-0.883527	-0.777852
9130401M01Rik	-0.782803	-0.985447	-1.12794	-0.215048	-0.911303	0.0196127	-0.820656	0.0931688	1.58817	1.21184	0.147754	0.337001	-0.420163	1.80879	0.779976	1.85109	0.311221	-0.708637	-1.14875	-1.02788
9230114K14Rik	2.58849	-0.70412	0.108049	0.242735	-0.780115	1.7426	0.589467	-1.0945	1.45356	0.072939	-0.264431	-0.585768	-1.0945	-0.54133	0.104582	-0.160162	-0.363349	0.641803	-0.86145	-1.0945
9330133O14Rik	-0.63841	-1.19325	-1.28676	-1.28676	0.293326	0.791799	0.598313	-0.472298	-0.104849	1.10872	2.97838	-0.316953	0.719844	-0.127582	0.819565	0.126627	-0.231641	-0.654952	-0.471723	-0.651396
9430015G10Rik	0.372443	-1.13979	-0.787861	-1.13979	0.483407	1.08288	2.49613	-1.13979	0.493851	1.44593	-0.377618	0.257075	-0.675517	-0.748144	0.765806	-0.529391	0.704778	0.231658	-1.13979	-0.656264
9430016H08Rik	0.232608	-1.90123	-1.28289	0.0135494	2.29414	0.911407	0.867547	0.938943	0.241064	0.871575	-0.174633	-0.0871764	-0.682439	0.56651	-0.510224	0.25291	0.693157	-1.0916	-1.08621	-1.06701
9430023L20Rik	-0.899033	-1.3743	-1.41725	-0.95092	0.410306	1.32685	2.64662	-0.712169	0.47871	-0.538889	-0.343495	-0.815661	-0.927731	0.555983	0.273793	0.157349	0.221534	0.39944	0.877292	0.631571
9430038I01Rik	-0.895085	-1.3075	-0.99744	-0.636056	0.577686	0.716447	-0.506627	-1.08511	0.376705	0.123496	0.294263	-0.496119	0.562668	1.41179	1.25151	1.75457	1.60817	-0.615224	-0.83063	-1.3075
9430069I07Rik	-0.336474	-0.336474	-0.336474	4.13387	-0.336474	-0.336474	-0.336474	-0.336474	0.283351	-0.336474	-0.0227145	-0.336474	-0.214708	-0.336474	-0.336474	0.464368	0.0386394	-0.30865	-0.336474	-0.336474
9430076G02Rik	2.74999	-0.020026	3.07464	-0.345604	-0.345604	-0.345604	-0.345604	-0.345604	-0.33743	-0.345604	-0.345604	-0.345604	-0.345604	-0.345604	-0.31711	-0.345604	-0.345604	-0.345604	-0.311608	-0.345604
9530008L14Rik	-0.429141	-0.339506	-0.429141	-0.429141	-0.429141	-0.429141	-0.429141	-0.429141	-0.101635	-0.429141	0.00975337	-0.342221	0.0555305	-0.429141	-0.429141	-0.32636	-0.429141	1.96575	3.56403	0.235211
9530068E07Rik	-1.08981	-1.75386	-1.59087	-0.588358	-0.263509	-0.246894	-0.4398	-0.592764	1.1471	0.246578	0.340112	-0.555204	-0.558015	0.744616	0.387268	0.729674	0.0188338	0.489672	1.01175	2.56349
9530077C05Rik	0.389377	-0.539371	-0.79174	-0.79174	1.3417	2.61119	1.96406	-0.712168	-0.506165	-0.53323	-0.515671	-0.79174	-0.288134	-0.398188	-0.560452	-0.550484	-0.642163	0.52678	1.11104	-0.322901
9830001H06Rik	-0.141684	-0.403854	-0.56531	-0.56531	-0.56531	0.0468379	0.319923	-0.433667	-0.300588	1.1692	3.68171	-0.56531	-0.31922	-0.292058	1.02195	-0.200277	-0.240806	-0.5471	-0.533813	-0.56531
9830107B12Rik	-0.431605	-0.350813	-0.188338	-0.442426	-0.442426	-0.424539	-0.41574	-0.442426	-0.133386	-0.417808	-0.395026	-0.424997	-0.150376	-0.215023	-0.408589	-0.374674	-0.327319	0.715509	1.56166	3.70834
9830166K06Rik	-0.516467	0.105337	-0.516467	-0.516467	-0.516467	-0.457789	-0.516467	0.974937	-0.417234	-0.476093	-0.516467	-0.516467	-0.246101	-0.393629	-0.516467	-0.516467	-0.516467	1.78714	3.18266	1.10544
9930021J03Rik	-0.747564	-1.32535	-1.1619	-1.09775	2.15444	0.507858	2.29904	-0.349709	-0.548649	1.00016	0.738481	0.188027	-0.233283	0.628831	0.365682	-0.513499	-0.181618	-0.598336	-0.748438	-0.37642
9930111J21Rik1	-0.644286	-0.794708	-0.794708	0.126244	-0.794708	-0.453823	-0.608049	-0.794708	-0.7584	-0.47767	2.14848	0.553742	2.35214	1.03327	0.974187	-0.238864	0.999043	-0.699315	-0.487689	-0.64018
a	-0.272001	-0.272001	-0.272001	4.22966	-0.272001	-0.272001	-0.272001	-0.272001	-0.154484	-0.245059	0.0699242	-0.272001	-0.189494	-0.272001	-0.272001	-0.200968	-0.272001	-0.238736	-0.272001	-0.00683866
A030009H04Rik	-0.495743	-0.706672	-0.830557	-0.573438	-0.830557	0.603843	0.537855	-0.416146	-0.140294	1.76248	0.420837	-0.0132543	-0.294369	-0.590814	3.05717	0.919231	-0.119993	-0.628462	-0.830557	-0.830557
A130010J15Rik	-0.638789	-0.682357	-0.686776	3.94695	-0.477628	-0.301078	0.172013	0.246341	0.322235	0.344305	0.47384	-0.353795	0.0249745	-0.311618	-0.194518	-0.0881696	-0.172562	-0.473068	-0.710544	-0.439753
A130040M12Rik	-0.490913	-0.551018	-0.543438	-0.410758	-0.344602	-0.272767	-0.404401	3.89795	-0.397388	-0.371068	0.740066	0.534215	-0.317868	-0.361236	0.0285965	-0.446735	-0.493158	-0.389972	-0.0952133	0.68971
A230046K03Rik	-1.11833	-1.26931	-1.31779	-0.681937	1.99935	0.406866	0.949129	-1.15526	-0.736109	0.52782	1.81218	-0.103945	0.58436	0.529225	0.916059	0.138981	0.596575	-1.00568	-0.515618	-0.556578
A230051G13Rik	2.81855	-0.17062	2.75746	0.712625	-0.1584	-0.213565	-0.527035	-0.173103	-0.376353	0.0332846	-0.453774	-0.268867	-0.29602	-0.331747	-0.545349	-0.42357	-0.502402	-0.577452	-0.598164	-0.705496
A2ld1	-0.0967605	-0.632281	-0.632281	3.25509	0.0490814	-0.043966	-0.218209	-0.632281	-0.427393	0.900478	1.1468	1.58149	-0.311595	-0.502405	-0.510372	-0.503716	-0.553552	-0.603561	-0.632281	-0.632281
A430005L14Rik	3.15734	-1.12552	-1.14644	-0.267456	-0.737903	-0.429635	0.0563345	-0.128696	0.81287	0.506919	0.265801	-0.299783	-0.58888	-0.241824	0.25784	1.3763	0.316122	0.228569	-0.937296	-1.07465
A430035B10Rik	-0.486788	-0.592667	-0.478837	1.81554	-0.170048	0.443875	0.854638	-0.577419	-0.566144	-0.403444	3.33739	-0.576805	0.302798	-0.453867	0.125338	-0.462406	-0.523165	-0.550303	-0.506902	-0.530778
A430084P05Rik	-0.276019	-0.287299	-0.305916	0.0363694	-0.259099	-0.0982567	-0.26915	-0.305916	-0.305916	-0.283143	4.22789	-0.182666	-0.0610864	-0.0978239	-0.145072	-0.276814	-0.280758	-0.283833	-0.305916	-0.239579
A530032D15Rik	-0.687572	-0.687572	-0.687572	3.10071	-0.687572	-0.59652	-0.385184	-0.687572	-0.322224	-0.504828	1.3065	-0.571983	1.88701	0.145945	0.153641	-0.412658	-0.549929	-0.0832057	0.173401	0.0971891
A530054K11Rik	-1.51628	-1.5426	-1.37594	2.52426	0.230691	0.0615768	0.992892	0.407359	-0.406965	0.608927	0.750947	-0.547077	0.910744	0.84272	-1.04064	0.187902	-0.352303	0.0766932	-0.000559943	-0.812347
A530064D06Rik	-0.594341	-0.490822	-0.485331	-0.594341	-0.594341	-0.535636	-0.541938	-0.408407	-0.466313	-0.438748	0.751802	-0.473026	-0.466474	0.694802	-0.102506	0.0729696	0.308787	-0.0437352	0.624146	3.78345
A530088E08Rik	-0.742824	-0.742824	-0.742824	-0.742824	3.29535	0.36266	-0.0885609	1.22945	-0.625576	0.138374	0.905511	0.149314	1.07735	-0.249614	-0.742824	-0.402953	-0.56182	-0.511642	-0.578008	-0.425714
A630001G21Rik	-0.906753	-0.77684	-0.986515	-0.0529338	2.46687	1.08371	1.6956	-0.524224	-0.0425122	-0.333443	-0.56154	-0.17094	2.08051	-0.38405	-0.40055	-0.180935	-0.403634	-0.455465	-0.442111	-0.704248
A630007B06Rik	0.339339	-1.66109	1.59798	1.27171	1.31846	0.258774	1.66496	-0.685092	-1.2608	-0.270333	0.595059	-1.48248	-1.08775	0.340995	0.398372	-0.25086	0.532725	-0.635114	-0.505204	-0.479658
A630033H20Rik	-0.848903	-0.612296	-0.889112	-0.889112	1.16446	0.880111	1.79966	-0.889112	-0.830421	-0.76315	0.450379	-0.38489	2.0421	1.3118	0.976503	-0.159141	-0.146685	-0.669609	-0.845628	-0.696951
A630055G03Rik	-0.0984436	-0.678623	-0.755573	-0.522234	-0.224202	1.3845	3.50322	-0.324539	0.464988	0.268705	-0.747089	-0.391926	-0.660257	-0.719523	0.167262	0.32517	0.00577875	0.450815	-0.692456	-0.755573
A630066F11Rik	-0.287331	-0.678496	-0.13409	-0.869083	-0.869083	-0.274665	0.0536577	3.85742	-0.165687	-0.0450604	0.600162	-0.206712	-0.191516	-0.381283	-0.182746	-0.578034	-0.337763	0.221419	0.832551	-0.363659
A630072M18Rik	-0.103962	-1.20566	-0.163852	-0.534116	3.11211	0.262062	0.50462	0.0295629	0.121091	0.934148	1.59489	0.398886	-0.278709	-0.695889	-0.275789	-0.477056	-1.06785	-0.812232	-0.840736	-0.501523
A730036I17Rik	1.97962	-0.315733	3.64957	-0.315733	-0.315733	-0.315733	-0.315733	-0.315733	-0.315733	-0.315733	-0.315733	-0.315733	-0.315733	-0.315733	-0.315733	-0.291044	-0.315733	-0.315733	-0.286425	-0.315733
A730098P11Rik	-0.414374	-1.46763	-1.25887	-0.745852	1.73921	0.0415648	0.699652	2.06043	-0.0460053	-0.147624	0.402262	-0.797778	0.607593	0.384538	0.18554	0.353217	1.46232	-0.911524	-1.06508	-1.08158
A830007P12Rik	-1.26254	-1.35987	-1.40012	-0.0105709	0.34831	-0.423248	-1.12319	2.29486	-0.0867172	1.44217	0.319082	1.03958	0.391486	0.614366	-0.69754	-0.411688	-0.4399	-0.452449	-0.156289	1.37426
A830080D01Rik	-0.065871	-1.35325	-0.886055	1.22497	1.8037	0.85989	2.32383	-0.758144	-0.484904	1.06866	-0.53216	-0.0625906	0.759822	-0.748249	-0.473942	-0.57274	-0.551286	-0.135891	-1.04868	-0.367104
A930001N09Rik	-0.825314	-1.1426	-0.154864	-0.718784	1.27679	-0.335543	0.250243	0.329169	-1.22446	0.171347	2.60316	0.288587	1.46981	0.970762	0.410564	-0.685835	-0.689216	-1.31205	-0.337779	-0.343979
A930005H10Rik	-0.89383	-1.02513	-1.07655	0.198566	2.34008	0.271628	0.434614	1.23498	-0.147713	0.544346	-0.466455	2.08715	0.869281	-0.537713	-0.864075	-0.399895	-0.328025	-0.609289	-0.685014	-0.946949
AA467197	-0.358238	-0.180296	-0.366103	-0.318366	-0.319121	-0.347571	-0.357748	-0.363594	-0.363451	-0.21027	-0.311072	-0.362403	-0.129666	-0.273698	-0.349401	-0.363563	-0.37723	0.62709	4.04663	0.678069
AA960436	-1.46352	-1.53773	-1.35998	-1.29115	0.936378	-0.297536	-1.09947	0.261973	1.11639	0.564296	1.77881	-0.790912	1.18081	0.644532	0.766535	0.285866	-0.0212315	-0.384562	-0.144679	0.855168
AA987161	-1.31195	-1.80523	-1.4366	1.44173	0.977342	-0.0976259	0.926586	0.396203	-0.331922	1.53308	0.157536	0.361375	1.25371	0.378558	-0.123461	0.604191	-0.401987	-0.61806	-0.307245	-1.59623
Aaas	0.933138	-1.15533	-1.03338	0.149191	-0.59369	1.1866	3.05024	0.161525	0.376964	0.0916004	-0.319533	0.356375	-0.887159	-0.865827	-0.0655168	0.0152296	0.88728	-0.436386	-0.953328	-0.898005
Aacs	-0.983962	-1.37682	-1.44209	-0.973218	0.594807	-0.0182143	-0.542436	1.533	0.178724	-0.44996	2.51199	-0.763136	0.194838	-0.698432	0.326488	0.210648	-0.325293	-0.041455	0.846965	1.21755
Aagab	-0.710257	-1.81468	-1.87172	0.0429639	-0.293031	0.501908	0.828071	0.0793957	0.527508	1.43548	1.40222	-0.753741	-0.491717	-0.136929	1.79425	0.745719	0.577385	-0.361186	-1.03981	-0.461831
Aak1	-0.24522	-1.14001	-1.2616	-0.12953	-0.535155	-0.366496	0.320139	0.740338	-0.309905	0.284561	0.681124	3.65568	0.040037	0.0650378	0.0292282	-0.274423	0.00847756	-0.379825	-0.468389	-0.71407
Aamp	-1.06417	-1.89189	-1.79316	0.695143	1.56271	0.239035	-0.0514975	-0.0309992	0.927345	1.09499	0.626267	1.29332	-0.213562	0.679598	0.306167	0.287032	0.371392	-1.10081	-1.13252	-0.804404
Aars	3.39865	-0.871995	1.31887	0.635137	0.353406	0.605367	0.567191	-0.757125	-0.21271	-0.296196	-0.380726	-0.443574	-0.251905	-0.526748	-0.157869	-0.249359	-0.194442	-0.657414	-1.04543	-0.833121
Aars2	-0.506064	-0.897853	-0.897853	-0.31658	0.338201	0.704475	0.833464	3.28688	0.650627	0.971812	0.13209	-0.788297	-0.897853	-0.285836	-0.247281	0.327715	-0.0838727	-0.591088	-0.834832	-0.897853
Aarsd1	0.526584	-1.43027	-1.44826	0.401683	-0.736782	1.66503	1.23168	0.0981228	1.51245	0.798882	-0.0824045	-0.130034	-0.493658	-0.781644	0.834946	0.727777	0.555814	-0.39269	-1.41253	-1.4447
Aasdhppt	0.783264	-1.28618	-0.94865	0.628026	2.09965	1.09681	0.363538	-0.208153	0.969812	0.543935	1.35273	-0.642549	0.309021	-0.555898	0.430037	-0.351525	-0.778578	-1.16119	-1.25665	-1.38745
Aatf	-0.560065	-1.20293	-1.57582	-0.0124199	0.537258	1.36837	-0.0712788	-1.05281	0.322594	2.16606	0.191822	1.4925	0.430968	-0.123017	0.702821	0.685442	-0.244069	-0.944554	-1.25139	-0.859489
AB124611	-1.09456	-0.842847	-0.905091	-0.870485	0.738057	-0.316911	-0.528351	0.539603	-0.558336	-1.01492	-0.844841	-0.171869	0.328838	1.85888	-0.440082	-0.0538783	0.21166	0.143979	1.17309	2.64806
Abca1	-0.48237	-0.491213	-0.48168	2.00847	-0.0212199	-0.389034	-0.416141	-0.42382	-0.487528	0.333984	-0.456403	0.371514	3.41127	0.29116	-0.244728	-0.494835	-0.510137	-0.455088	-0.498623	-0.563583
Abca13	-0.496641	-0.228704	-0.496641	-0.496641	-0.496641	-0.439149	-0.496641	-0.496641	0.345487	-0.436162	-0.450373	-0.465062	-0.181437	-0.192369	-0.45345	-0.464073	-0.467472	2.41643	3.00131	0.994873
Abca2	-0.787634	-0.756107	-0.565922	-0.664347	-0.879818	-0.547417	-0.726482	3.1595	0.509909	1.24341	0.191865	1.48394	-0.43322	-0.166062	-0.122454	0.455013	0.204094	-0.540021	-0.737505	-0.320747
Abca3	0.641165	-0.750229	-0.995934	-1.17984	0.553701	-0.542055	-0.0813689	-1.17984	-0.773519	-0.139335	0.477622	-0.871515	1.56223	1.2937	1.73336	0.895767	1.55458	-0.837225	-0.870786	-0.490478
Abca7	1.22048	-1.51377	-1.08596	-0.132985	-1.43341	-1.09967	-1.33176	0.696824	-0.421386	0.291075	0.118916	-0.496231	-0.55944	1.67694	-0.0144705	0.634766	1.78394	0.107672	0.91974	0.638731
Abca9	-0.389694	-0.457136	-0.457136	-0.457136	-0.457136	-0.457136	-0.457136	-0.457136	-0.345108	-0.374332	-0.3846	-0.457136	-0.457136	3.1334	2.26217	0.95584	0.463869	-0.427445	-0.322731	-0.457136
Abcb10	3.52008	-0.25988	2.17688	-0.397855	-0.298119	-0.361902	-0.349148	-0.30008	-0.14047	-0.240814	-0.3452	-0.311432	-0.278436	-0.356517	-0.357972	-0.316981	-0.349174	-0.272059	-0.377429	-0.383497
Abcb1b	-0.884531	-0.797534	-0.904261	2.25014	-0.100172	-0.0720287	-0.735184	-0.652486	-0.13797	0.349249	1.31111	-0.17943	-0.863406	0.400262	2.01737	0.654303	1.01918	-0.888339	-0.882007	-0.904261
Abcb4	3.91923	-0.0492897	1.29588	-0.400447	-0.179035	-0.354496	-0.133709	-0.400447	-0.381155	0.148887	-0.0834397	-0.356343	-0.263026	-0.400447	-0.371883	-0.400447	-0.388496	-0.400447	-0.400447	-0.400447
Abcb6	3.98714	-0.312534	1.14913	-0.0296294	-0.244693	-0.0286562	-0.32018	-0.411641	-0.0396201	-0.137043	-0.338289	-0.354977	-0.330281	-0.40949	-0.388115	-0.258856	-0.317056	-0.381666	-0.383193	-0.450343
Abcb7	1.45883	-1.59293	-1.21099	-0.740796	0.220693	0.472261	0.68112	-0.191859	-0.186885	0.133325	0.671106	-0.407292	-0.438512	1.26332	0.365263	1.177	1.73819	-0.501663	-1.27741	-1.63277
Abcb8	-0.146505	-1.33368	-1.33368	-0.0222272	1.86311	1.28009	0.189693	-0.625362	1.89194	0.792119	0.78816	0.153633	-0.684457	-0.423425	0.45411	0.626159	-0.121209	-1.04913	-1.2663	-1.03302
Abcb9	0.90317	-0.493667	0.233838	-0.493667	-0.0166648	-0.470797	-0.493667	0.0632174	0.038948	-0.249018	-0.354103	3.95595	-0.493667	-0.401235	-0.493667	-0.414544	-0.493667	-0.337093	0.284827	-0.274497
Abcc1	-0.67231	-0.706458	-0.625249	-0.298538	-0.4891	-0.733653	-0.594605	2.0736	0.414009	0.266057	2.97951	-0.239584	-0.416809	-0.229855	1.3068	-0.101362	-0.481334	-0.249186	-0.588954	-0.612976
Abcc4	-0.0209448	-1.15121	-0.934674	-0.363768	-1.22393	-0.745708	-0.877284	-0.417975	1.66331	0.890693	-0.0112522	-0.719072	-0.0829846	1.1156	-0.329938	1.61826	2.19672	0.366812	-0.185899	-0.786768
Abcc5	0.64296	-0.711393	-0.921722	-1.09652	-1.09652	-0.205212	-0.647442	-0.185162	0.408314	0.0963439	-0.8871	-0.0214062	-0.480488	1.59338	-0.321389	0.185898	-0.22362	1.46866	2.83934	-0.43692
Abcd1	-1.25023	-1.43709	-1.43709	0.125773	-0.0862047	0.649912	0.615549	-1.43709	-0.389738	0.503015	1.74322	-1.02785	0.521396	0.848074	0.368251	1.08849	1.75894	-0.576068	-0.36263	-0.218636
Abcd2	-0.64079	-0.700129	-0.780151	-0.780151	-0.649671	-0.759958	-0.611359	0.142478	0.504349	-0.72206	-0.712964	-0.742812	-0.545543	2.90454	-0.21252	0.870073	0.67545	0.217479	0.837451	1.70629
Abcd3	-0.605987	-1.2027	-1.15548	0.215394	1.94966	0.142966	-0.237804	2.49425	1.20976	0.174958	-0.72131	-0.809598	0.231161	-0.280247	-0.733419	0.233307	0.198499	0.71887	-0.693669	-1.12861
Abce1	0.560531	-1.61571	-1.40507	0.585144	0.528006	1.2111	0.192104	-0.130068	1.5822	1.51232	0.34528	-0.166078	0.346584	-0.711187	0.533603	0.816594	-0.415732	-0.665155	-1.47991	-1.62455
Abcf1	0.513492	-1.3251	-1.25078	0.529886	0.819437	1.6057	2.23754	-0.202905	-0.00189194	0.796674	0.783722	-0.116744	0.0954661	-0.487444	0.0368881	0.0619185	-0.131345	-1.15357	-1.29451	-1.51642
Abcf2	-0.0323455	-1.48975	-1.2136	0.251509	0.333813	2.27968	0.923831	-0.593484	1.41195	1.68933	-0.0295712	-0.352339	-0.371793	-0.221342	-0.407356	0.791383	-0.281199	-0.50106	-0.928742	-1.25892
Abcf3	-0.363943	-1.76008	-1.10602	1.34774	1.65092	1.61649	1.06159	-0.657694	0.167256	0.453176	0.386574	0.887643	-0.622007	-0.416811	0.681927	-0.190274	0.0330912	-0.656029	-1.18993	-1.32361
Abcg1	-1.22912	-0.937982	-1.14321	-0.0114604	1.8401	-0.278376	-0.528005	1.49	-1.00789	0.912638	0.245831	1.17367	0.980628	1.4973	0.480323	-0.605889	-0.623376	-1.06783	-0.689184	-0.49816
Abcg2	3.0909	-0.302293	2.72029	-0.391812	0.000244168	-0.356787	-0.380443	-0.346422	-0.316465	-0.15313	-0.323929	-0.295031	-0.391743	-0.391834	-0.314462	-0.349495	-0.313315	-0.397587	-0.401732	-0.384955
Abcg4	4.23922	-0.239602	0.0570903	-0.239602	-0.239602	-0.239602	-0.239602	-0.239602	-0.223077	-0.239602	-0.239602	-0.239602	-0.239602	-0.239602	-0.239602	-0.239602	-0.239602	-0.239602	-0.239602	-0.239602
Abhd10	1.38234	-2.10417	-1.32844	-0.562876	-0.231103	0.188587	0.630365	-0.946472	1.40538	0.671958	-0.695017	-0.421672	-0.0474366	-0.669047	-0.636645	-0.213988	-0.054785	1.23436	0.564515	1.83414
Abhd11	-0.631002	-1.25688	-1.32266	-0.0690736	-0.253996	-0.309784	-0.690381	0.56966	2.5976	1.19182	0.175485	0.439365	-0.409743	0.799935	0.558287	1.26551	0.314708	-0.775023	-0.887911	-1.30591
Abhd12	-1.14566	-0.869563	-1.42127	1.49152	-0.127181	-0.0549947	-0.407896	-0.199058	-0.0270067	0.28628	0.454424	0.160176	-0.596385	2.27439	0.977062	0.786346	1.3446	-0.495875	-1.07525	-1.35466
Abhd13	-0.729995	-1.21633	-1.33583	-1.33583	2.9417	-0.135929	1.95334	-0.133137	-0.126716	-0.0627375	0.0954791	-0.330571	-0.378092	-0.140026	0.202361	0.0308594	-0.131193	0.546822	-0.183845	0.469661
Abhd14a	-0.333145	-0.661732	-0.829075	-0.0677642	0.143356	0.619429	-0.790028	0.600885	1.4506	3.39768	-0.0529849	0.226108	-0.0909948	-0.536982	-0.266234	0.181221	-0.59776	-0.778046	-0.785455	-0.829075
Abhd14b	-0.799149	-0.8871	-0.8871	0.35243	-0.8871	-0.456303	-0.8871	2.50017	0.492199	1.08581	2.05881	0.0612603	0.874459	-0.0897279	0.0174265	0.120834	-0.128398	-0.8871	-0.76722	-0.8871
Abhd15	-0.619528	-0.699666	-0.699666	-0.699666	0.595556	-0.446366	-0.699666	1.77785	-0.586367	0.136043	2.73609	-0.438693	-0.544261	0.299987	1.81997	-0.022938	-0.0116036	-0.641157	-0.669738	-0.586179
Abhd16a	3.11639	-1.58215	-0.815041	-0.517993	0.406965	-0.632349	0.0471315	0.59767	-0.0924658	1.08924	0.734007	-0.175798	-0.274385	-0.166092	0.714959	-0.0902532	0.311058	-0.756585	-0.817448	-1.09687
Abhd4	0.595117	1.89432	3.05941	-0.3325	-0.341867	-0.616849	-0.638656	0.602059	-0.0538659	0.846951	0.137451	-0.830083	-0.468768	-0.0100488	-0.481428	-0.369725	-0.84599	-0.795362	-0.821507	-0.528657
Abhd5	0.151884	-0.710264	0.518792	-0.303424	-0.804211	-0.823794	-0.847218	-0.223541	0.729654	-0.679932	-0.643491	-0.737624	-0.645415	-0.0942825	-0.62818	0.186791	-0.25614	2.92726	1.8996	0.983534
Abhd6	-0.494506	-0.518524	-0.518524	2.92725	-0.291775	-0.160959	-0.419422	-0.306285	-0.474014	-0.370401	2.57241	-0.0503688	0.775484	-0.501883	0.373498	-0.475956	-0.518524	-0.510452	-0.518524	-0.518524
Abhd8	-0.475269	-0.992281	-1.07655	0.91173	0.853933	1.03441	0.451401	1.21622	-0.509619	0.660184	-0.402717	2.85555	-0.449075	-0.781171	-0.184417	-0.270969	-0.25704	-0.611948	-0.996624	-0.975746
Abi1	-1.07039	-1.41703	-1.44055	-0.286575	3.17106	0.372495	0.620225	0.333575	-0.605905	-0.38491	-0.113169	-0.439692	0.0175319	1.13008	0.891807	0.018798	-0.0162087	-0.257752	-0.245502	-0.277896
Abi2	-0.605836	-0.904859	-0.6822	-0.0856274	2.23868	0.305774	-0.259427	-0.904859	0.141673	2.71244	0.245547	0.504758	-0.904859	-0.353067	0.496715	0.504097	0.111432	-0.750667	-0.904859	-0.904859
Abi3	-0.741972	-0.659043	-0.819342	-0.564417	0.543284	0.382942	0.687799	-0.729052	-0.741992	-0.281923	1.65204	0.255252	2.18399	2.26127	-0.086509	-0.528766	-0.664247	-0.730957	-0.746718	-0.671642
Abl1	-0.975866	-1.32646	-1.5088	0.0332794	1.2941	1.56342	1.16956	0.0164675	-0.499104	1.02313	1.35442	-0.34771	-0.326012	0.0158816	1.17948	0.100593	0.445768	-0.883626	-1.35649	-0.972028
Abl2	-0.865025	-0.888123	-1.0272	0.445168	3.41455	0.633011	0.554651	-0.715157	-0.36385	0.67776	-0.00921306	0.730331	-0.0368611	-0.197399	0.403461	-0.584778	0.0399937	-0.831948	-0.777361	-0.602007
Ablim1	-0.58475	-0.563018	-0.434931	-0.620769	2.6137	0.759671	0.805963	-0.568491	-0.583206	-0.38989	0.182241	2.07744	1.44392	-0.584426	-0.488787	-0.597847	-0.620769	-0.612603	-0.612679	-0.620769
Abr	-1.40501	-1.29528	-1.4883	-0.716713	0.983752	-0.665767	-1.23474	0.911195	-0.461705	-0.158707	1.49297	-0.180233	-1.15285	1.10893	1.18351	0.639099	0.881142	0.177585	1.02537	0.355759
Abt1	-0.879044	-1.50903	-1.69465	1.53034	2.24936	0.899872	1.24477	0.0689017	0.108629	0.514312	0.106688	-0.596912	0.184322	-0.431367	0.0520042	0.322747	0.278841	-0.409089	-0.935248	-1.10545
Abtb1	0.0770245	0.254911	1.44834	-0.497944	0.0606502	-0.684135	-0.732474	0.652364	-0.554554	-0.636159	-0.565776	-0.795624	-0.451811	-0.100109	-0.722497	-0.579025	-0.397695	-0.230467	1.16022	3.29477
Acaa1a	-1.38741	-1.65038	-1.57095	0.939237	1.19675	-0.37496	-0.388789	-0.198897	-0.174314	-0.146836	0.97226	0.179388	0.118652	1.86412	0.788462	1.1457	0.868923	-1.19494	-0.733838	-0.252172
Acaa2	0.442675	-1.39186	-1.50149	-0.716135	0.883942	-0.508671	-0.813528	0.339692	1.63729	0.617948	-0.541157	0.387062	-0.320178	1.25712	0.561068	1.75821	0.810452	-0.585483	-1.11271	-1.20425
Acad8	-1.14257	-1.00008	-1.04307	-1.31333	0.106878	-0.456823	-0.460058	-0.847905	0.615702	0.537822	0.430187	-1.14665	-0.59655	1.03434	1.79752	1.36426	1.15466	0.0333947	1.53283	-0.600572
Acad9	-0.316934	-1.30035	-1.51156	0.623281	-0.461379	1.23218	0.60762	-0.615141	1.74901	1.11808	-0.124532	-0.167852	0.759144	-0.734566	1.0536	0.918838	0.67573	-0.936789	-1.26092	-1.30747
Acadl	1.53678	-1.97654	-1.26731	-0.393974	0.903116	0.444719	1.36458	0.402641	-0.104882	0.310499	0.859298	-0.447871	-0.546025	-0.890253	1.12841	0.629515	0.663732	0.0918255	-1.28441	-1.42386
Acadm	-0.785958	-1.6204	-1.62187	0.44156	1.49556	-0.0532545	-0.195441	0.0854757	0.105343	1.52057	-0.136256	-0.532341	-0.160449	1.37545	1.89431	0.459065	0.234452	-1.11845	-0.559756	-0.827604
Acads	-0.853989	-1.04655	-1.10725	-0.583979	2.77204	0.640497	0.652668	0.68976	1.12586	1.2916	0.275667	-0.198335	-0.770648	0.0656707	-0.421875	0.364532	-0.0934305	-0.889696	-0.849506	-1.06304
Acadsb	-1.44959	-1.62498	-0.96653	1.30125	0.640895	-1.43169	-1.47856	1.05904	0.00068122	0.805706	1.16916	-0.549856	-0.244928	1.20815	-0.479473	0.119893	1.19077	-0.101876	0.361985	0.46994
Acadvl	0.491993	-1.98675	-1.95549	0.993303	1.72362	0.390437	0.554663	0.475873	0.736317	0.848311	0.229162	0.925952	-0.528406	0.403681	0.00120801	0.231635	-0.279444	-1.00912	-0.958444	-1.2885
Acap1	-1.21485	-1.12826	-1.34482	-0.487522	-0.333597	0.222698	0.373717	1.82914	0.168977	0.946344	1.06793	2.19702	-0.28152	-1.1457	-0.0338346	-0.973989	-0.946881	0.238291	0.505719	0.341143
Acap2	-1.60226	-1.58292	-1.79081	-1.10138	1.33065	-0.214169	0.523668	-0.646584	-0.449037	0.416206	0.697763	-0.622933	-0.262956	0.985786	1.57857	0.114449	1.14439	0.193303	0.530549	0.757717
Acat1	0.778772	-1.7064	-1.17493	-0.0980368	0.0729206	0.751552	0.806661	0.151398	0.430412	1.1212	0.147105	0.0260942	-0.452753	-0.119788	0.239755	1.46036	1.72453	-0.999747	-1.50784	-1.65126
Acat2	0.0131996	-1.10248	-1.15037	-0.189131	-0.505148	0.987303	1.53675	0.935695	0.842032	1.25396	1.15408	-0.674493	-0.896856	-0.852396	1.48193	0.818013	-0.714146	-0.716849	-1.07074	-1.15037
Acbd3	-0.801467	-1.46345	-1.47541	1.44241	2.58294	0.50158	1.06199	0.398065	-0.446858	0.16309	0.070315	-0.289245	0.710049	0.325324	0.118005	-0.0962329	0.0708319	-0.818954	-0.931656	-1.12132
Acbd4	1.1879	-1.125	2.37095	0.948194	1.6657	0.157323	0.201742	-0.304823	-0.835209	-0.883278	-0.220743	-0.214521	1.34778	-0.337287	0.0694299	-0.740693	-0.836556	-0.848643	-1.03565	-0.566625
Acbd5	-0.708654	-0.734246	0.539567	2.15845	0.784107	-0.264964	0.482387	-0.417264	-1.04359	-0.300608	2.25375	-0.380659	-0.420884	0.973	1.0048	-0.430827	-0.89526	-1.05449	-0.981672	-0.562938
Acbd6	-0.573378	-1.9092	-2.07882	0.188771	1.12902	1.29478	0.0242929	1.41691	0.662197	1.39406	0.684608	-0.071215	-0.0473159	-0.29774	0.256589	0.233814	-0.654088	-0.0256273	-0.14691	-1.48074
Acd	-0.0301088	-1.28013	-1.55009	0.428858	2.38744	1.5277	0.274652	0.842453	0.950562	0.552103	0.636433	-0.47939	0.0820922	-0.435781	-0.505592	0.0566535	-0.556947	-0.465524	-0.931688	-1.50369
Acer3	0.124176	-0.776333	-0.730931	-0.516886	-0.753011	-0.682749	-0.732097	-0.283027	0.361003	-0.0995773	0.126927	-0.718227	-0.823403	2.13454	0.688078	1.7477	2.33912	0.0171234	-0.629282	-0.793146
Ache	3.75716	-0.302519	1.57935	0.420317	-0.385442	-0.342242	-0.385442	-0.385442	-0.349449	0.149848	-0.385442	-0.385442	-0.385442	-0.362205	-0.385442	-0.331816	-0.385442	-0.36403	-0.385442	-0.385442
Acin1	0.306772	-1.37704	-0.672208	-0.167836	2.04032	1.57507	1.51898	-0.0228681	-0.14053	1.00182	-0.0513019	0.063018	0.424799	-0.655897	0.476171	-0.363622	0.0650706	-1.03732	-1.3371	-1.64631
Acly	-1.53825	-1.75873	-2.25107	-0.198623	-0.333892	0.667431	1.5637	-0.466916	0.443408	0.84155	0.165336	0.0213975	0.00319294	0.607481	0.368272	1.32931	0.951051	0.0485797	0.47382	-0.937042
Acmsd	3.33042	-0.113429	2.45037	-0.335911	-0.335911	-0.335911	-0.335911	-0.335911	-0.335911	-0.335911	-0.335911	-0.335911	-0.335911	-0.335911	-0.335911	-0.335911	-0.335911	-0.335911	-0.292783	-0.335911
Aco1	0.272084	-1.29734	-1.29734	-0.863362	2.29188	-0.00107972	-0.382622	-0.0871046	0.587485	0.647111	0.347125	-0.625901	-0.585649	1.80484	0.443659	1.13383	0.483087	-0.760461	-1.12735	-0.982906
Aco2	0.289099	-1.53168	-1.09166	0.557142	2.06605	1.28854	2.11964	0.0596382	0.385692	0.289883	-0.180564	-0.240428	-0.656041	-0.388061	0.0794419	0.301976	-0.101001	-0.807262	-1.19207	-1.24833
Acot1	-0.750885	-0.687075	-0.859961	-0.375364	0.773938	-0.807065	-0.859961	-0.646576	0.477723	1.6823	-0.773439	-0.706014	-0.859961	0.749088	-0.859961	0.832442	-0.480103	0.680762	2.46744	1.00267
Acot13	1.89741	-1.54205	-0.720788	2.20387	-0.31701	0.653453	0.158036	0.385591	0.449512	0.0892817	0.273012	0.897462	0.495889	0.18074	-0.48461	-0.214267	-0.801883	-0.783409	-1.23523	-1.58502
Acot2	-0.757339	-0.916943	-1.06948	-0.350481	2.42911	1.49298	0.625223	0.833659	-0.553726	0.283213	0.29382	0.755197	1.64776	-0.518988	-0.468234	-0.55119	-0.639588	-0.868163	-0.815801	-0.851033
Acot7	-0.984345	-0.949883	-1.072	-0.904984	-0.686225	-0.307817	0.0787593	0.995687	1.95794	1.21474	-0.761424	0.858962	-0.666795	0.0130134	0.348937	1.17181	1.82645	-0.792649	-0.960533	-0.379646
Acot8	1.26274	-2.14118	0.951816	-1.56585	-0.166495	-0.674495	1.21407	0.593127	0.978448	-0.179453	0.856871	-0.654189	-0.717309	1.03009	-0.532287	0.889359	0.813846	-0.13366	-0.855459	-0.96999
Acot9	-1.19211	-1.31922	-1.33037	-0.687514	-0.0383469	-0.313259	0.243109	0.677707	0.158717	-0.423659	-0.517785	-0.582522	-0.400367	0.573795	0.847142	1.69512	2.76008	-0.458976	-0.169017	0.477473
Acox1	1.1487	-1.73185	-0.801628	-0.205787	-0.239042	0.448071	-0.677828	-0.681012	-0.189454	2.80579	0.682461	0.999925	-0.111292	0.655301	0.0905757	0.14879	-0.40779	-0.874994	0.329724	-1.38865
Acox3	-1.59562	-1.48269	-1.82602	-0.281885	1.31091	-0.374723	-0.0493993	-0.692178	-0.333606	-0.425392	0.834935	-0.104045	1.21677	1.62441	0.211083	0.385424	0.989812	-0.967389	0.610881	0.948727
Acp1	3.28894	-0.18438	2.44332	-0.387397	-0.198716	-0.00146801	-0.154626	-0.445355	-0.221963	-0.203519	-0.339569	-0.42964	-0.336784	-0.371516	-0.261956	-0.245706	-0.350181	-0.417867	-0.569871	-0.611746
Acp5	2.68143	-0.784389	-0.434126	-0.0979132	0.014137	0.224198	0.592279	0.0559655	-0.615442	-0.784817	-0.572644	1.55456	1.73958	-0.588741	-0.477574	0.76121	-0.77856	-0.827983	-0.855359	-0.805807
Acp6	-0.498744	-0.620295	-0.648757	0.0861739	3.82546	1.19398	0.49246	-0.0410818	0.0624668	-0.176157	-0.19536	-0.209843	-0.397286	-0.439517	-0.207274	-0.253287	-0.276572	-0.443692	-0.603921	-0.648757
Acpl2	-0.603982	-0.629244	-0.676722	-0.676722	-0.320936	-0.541136	-0.504557	-0.469368	3.4124	-0.115436	0.0456398	-0.0741642	-0.676722	-0.434147	-0.217501	0.648851	0.500463	1.76989	0.093318	-0.529924
Acpp	-0.550867	-0.35331	-0.162384	-0.550867	-0.216821	-0.53408	-0.391364	-0.550867	0.224044	-0.478695	-0.458518	-0.299875	-0.550867	-0.350446	-0.38747	-0.408866	-0.512303	1.21452	3.01048	2.30855
Acsf2	-0.799676	-0.733173	-0.787882	-0.716108	2.2341	0.729214	1.32312	-0.600338	-0.51299	0.262466	1.69511	0.910614	0.845792	-0.727295	0.805398	-0.648388	-0.70902	-0.843048	-0.840798	-0.887105
Acsl1	0.476238	1.35003	3.14557	-0.910572	-0.353353	-0.645617	-0.796337	-0.294173	0.0341028	-0.568403	-0.555585	-0.792599	-0.694103	-0.397049	-0.543587	-0.451889	-0.34618	1.01056	1.18358	0.149367
Acsl4	0.054334	-1.1432	-0.896301	-0.8456	-0.318497	0.821785	2.49946	-0.0226571	-0.641354	0.124947	1.82531	0.176371	-1.11398	0.129327	1.5962	-0.0662382	-0.264358	-0.880396	-0.228936	-0.80623
Acsl5	0.93526	-1.8407	-1.36205	-0.139327	-0.819962	0.443	0.455305	0.858013	0.623865	0.907959	0.157632	-0.666164	-0.789622	-0.166918	2.04967	1.2903	0.53121	-0.272474	-0.890822	-1.30417
Acss1	0.373548	-0.936238	-0.802412	0.701752	2.66355	1.36535	1.62956	-0.0809677	-0.795732	0.0675789	-0.349492	-0.328448	0.102585	-0.414278	0.84007	-0.645915	-0.481256	-0.958462	-0.998402	-0.952379
Acss2	0.00885404	-0.472184	-0.236664	-0.254099	-0.326481	-0.437684	-0.339383	4.14952	-0.381739	0.256365	-0.0737356	0.346787	-0.160482	-0.164969	-0.221104	-0.363459	-0.243316	-0.387268	-0.350737	-0.348219
Acta2	-0.318789	-0.264246	-0.26658	-0.270542	-0.237255	-0.253632	-0.303182	-0.318789	-0.284988	-0.318789	-0.279572	-0.2387	-0.21647	0.0740629	-0.25883	-0.201941	-0.127467	-0.242606	0.108705	4.21961
Actb	-1.27751	-1.73372	-1.71408	-0.919402	-0.8088	-0.366922	-0.288536	0.759482	-0.659216	-0.598381	-0.110585	-0.069415	0.514099	0.840087	1.2525	0.797633	1.01744	0.651839	1.39957	1.31391
Actg1	-1.28777	-1.32245	-1.40471	-1.29542	-0.386304	-0.314807	-0.428782	0.655662	-0.424212	-0.144273	-0.39674	-0.321051	-0.210427	1.30749	1.11683	1.42293	2.15234	0.0645711	0.280787	0.936335
Actl6a	0.656069	-1.15335	-1.10541	-0.306554	0.408063	1.53036	3.06872	-0.140047	0.353338	0.685273	-0.273128	-0.539241	-0.357661	-0.378687	-0.191615	0.330341	0.0342602	-0.425472	-1.16643	-1.02884
Actn1	-0.575096	-0.465432	-0.52849	-0.48617	-0.533135	-0.473593	-0.533427	-0.441743	-0.164492	-0.128199	-0.419008	0.242331	0.0966798	-0.409255	-0.476718	-0.528328	-0.547413	1.11634	2.06473	3.19042
Actn4	1.12773	-1.54861	-1.29673	-0.816597	0.0283419	1.28026	2.0683	0.483623	0.765429	0.110516	-0.865353	-0.101398	-0.92481	-0.543664	0.558134	0.197011	1.05085	0.611028	-0.858681	-1.32539
Actr10	-0.374494	-2.28537	-1.87484	0.183396	1.71919	0.339361	1.61346	0.237404	-0.323986	0.0817042	-0.444255	0.341425	-1.28294	0.313692	0.530049	0.787042	1.03903	-0.425107	-0.164487	-0.010276
Actr1a	0.0839381	-1.66293	-1.41194	-0.76212	0.537708	1.49842	2.40889	-0.342824	-0.00510813	0.0670567	-0.564522	-1.03241	0.221316	0.39165	0.519756	0.785963	1.16229	-0.406763	-0.962333	-0.526043
Actr1b	-0.170713	-1.68812	-1.74942	-1.27638	1.82642	1.17498	1.29491	0.167272	0.437434	1.24591	-0.439197	0.700081	-0.348039	-0.196946	0.991994	0.252209	-0.298032	-0.577402	-0.826394	-0.520568
Actr2	-1.506	-1.77197	-1.91764	-0.915832	-0.0337014	-0.317084	-0.27082	0.508826	0.18024	-0.578524	-0.0230265	-0.487274	0.194187	1.14903	0.439494	1.1565	1.39052	0.323056	1.37257	1.10744
Actr3	-1.54323	-1.54482	-1.69921	-0.987365	-0.287728	-0.306912	-0.170056	-0.367478	0.186857	-0.5758	-0.667417	0.119814	0.0586268	1.56071	0.967924	1.04698	1.30357	0.62585	0.997042	1.28264
Actr5	-0.992324	-1.31158	-1.56119	0.646989	1.52887	0.403326	1.60136	1.69258	0.00642239	0.109491	0.278337	0.324388	0.0718098	-0.33396	1.23629	-0.519138	-0.492693	-0.358362	-0.769423	-1.56119
Actr6	-0.818819	-1.83832	-2.00353	-1.27831	1.62789	1.40064	1.01562	-0.86705	0.377586	0.558633	0.354153	0.710925	0.0129165	-0.133193	0.88015	0.0673914	0.840041	-0.406133	-0.131319	-0.369277
Actr8	-0.398834	-1.60599	-0.615766	-1.38272	0.894313	0.0918294	1.84302	1.26909	-0.135757	0.787901	-0.621593	0.24827	0.205246	-0.344754	0.695734	0.517653	1.60806	-0.595846	-0.922883	-1.53697
Acvrl1	-0.440332	-0.207554	-0.337874	-0.483333	-0.483333	-0.47604	-0.483333	-0.483333	-0.473179	-0.353791	-0.394571	-0.483333	-0.385785	0.3303	0.3453	-0.199485	-0.0455405	-0.405428	1.93762	3.52302
Acyp1	-0.121297	-1.72323	-1.25887	-0.750554	3.03097	0.421691	0.365711	0.542574	1.03351	0.396209	0.157183	0.878021	-0.130748	-0.687259	-0.620854	-0.176494	0.330748	-0.376459	-0.517835	-0.793015
Ada	-0.7831	-0.674212	-0.842401	2.5503	1.49788	0.431651	-0.400071	0.00792503	0.881506	0.229317	-0.494923	-0.631681	-0.672416	-0.631247	-0.697142	-0.560476	-0.778603	1.97033	0.264818	-0.667461
Adam10	3.09601	-1.31765	1.9492	-0.238627	-0.350356	0.240531	0.844975	0.165589	-0.44805	0.133963	-0.241138	-0.445546	-0.163243	-0.248791	-0.352777	-0.0920937	-0.00436439	-0.621243	-0.942175	-0.964207
Adam11	-0.265744	-0.265744	-0.265744	-0.265744	-0.0868835	-0.192545	-0.265744	-0.265744	-0.223395	-0.265744	4.23006	-0.265744	-0.265744	-0.265744	0.118378	-0.25074	-0.151407	-0.254539	-0.265744	-0.265744
Adam15	-0.75104	-0.593126	-0.745333	-0.61566	-0.518114	-0.712206	-0.809144	-0.203318	0.0411069	-0.128437	-0.57916	-0.714563	-0.529999	2.26317	0.488598	2.55387	1.60719	-0.173806	-0.0612048	0.18118
Adam17	-0.921128	-1.67782	-1.0936	-0.172813	-0.969282	-0.145997	1.55681	1.60904	-0.502477	0.111077	0.0709679	-0.93888	0.479087	1.93268	0.684286	0.717915	0.743746	-0.927295	-0.762703	0.206398
Adam19	-0.717418	-0.605537	-0.739964	-0.00230581	-0.442448	0.594809	1.11464	-0.867749	-0.837935	-0.791365	3.30411	-0.321397	0.693855	-0.0835661	0.160237	-0.491354	-0.144843	-0.793365	-0.146411	1.11801
Adam33	3.99791	-0.328667	0.637791	-0.328667	0.897806	-0.328667	-0.328667	-0.328667	-0.274837	-0.328667	-0.328667	-0.328667	-0.328667	-0.328667	-0.328667	-0.328667	-0.328667	-0.328667	-0.328667	-0.328667
Adam8	-0.390895	-0.311636	-0.392349	-0.434457	-0.385568	-0.409296	-0.369336	0.649202	-0.421463	-0.407708	-0.346369	-0.29199	-0.146499	-0.211876	-0.407564	-0.346806	-0.357907	-0.252113	1.44702	3.78761
Adam9	-1.03807	-0.709731	-0.480157	-1.12434	0.718721	0.0995668	-0.070118	-0.828945	0.7386	0.561087	-0.0785109	-0.586982	-0.509845	3.11032	-0.273763	0.97915	1.20975	-0.347948	-0.632752	-0.736036
Adamts10	-0.924988	-1.17219	-1.17219	1.18688	-1.17219	0.278958	0.0443327	0.148073	-0.0989342	1.81019	0.872748	1.71758	-0.841495	0.633469	1.47121	-0.0746347	-0.297423	-0.562431	-0.674758	-1.17219
Adamts7	-0.252141	-0.252141	-0.252141	-0.252141	4.22665	-0.141193	0.19459	-0.252141	-0.252141	-0.252141	-0.252141	-0.252141	-0.252141	-0.252141	-0.252141	-0.245786	-0.252141	-0.252141	-0.252141	-0.252141
Adap1	-0.962933	-0.594764	-0.507085	-0.471397	-1.03656	-0.524059	-0.754923	0.235434	0.339995	0.469329	-0.619442	-0.854827	-1.03656	2.15954	0.0557749	1.2559	2.40746	0.696337	0.173594	-0.430807
Adap2	-0.554799	0.226062	-0.554799	-0.554799	-0.554799	-0.554799	-0.554799	-0.554799	-0.525752	-0.152464	1.5178	-0.410437	-0.554799	2.65639	2.48355	-0.0789272	-0.137336	-0.480933	-0.420091	-0.239469
Adar	0.41569	-1.6277	-1.02022	-0.104176	-0.0107518	-0.585364	-0.530372	-1.06579	-0.933182	-0.365521	1.77193	-0.359858	0.407416	1.49479	2.27733	0.0480241	0.598153	-0.895708	-0.0932674	0.578571
Adck2	-0.439933	-1.31561	-1.46547	-0.828606	3.05734	-0.545163	-0.428407	0.786869	0.0189104	0.187447	0.562903	0.502889	-0.581837	1.31481	-0.0828689	-0.099929	0.612856	-0.350342	-0.766169	-0.139685
Adck3	-0.746872	-0.387238	-0.763079	2.72239	2.16578	0.0821425	-0.686672	-0.763079	-0.351438	0.30695	0.441331	0.777742	0.788496	-0.531316	0.421824	-0.551824	-0.685641	-0.763079	-0.713335	-0.763079
Adck4	-0.357296	-0.327756	-0.409886	-0.227052	0.0409996	-0.207907	-0.200599	4.21068	-0.0657316	-0.184402	-0.190092	-0.356921	-0.344181	-0.0259055	-0.198793	-0.0675974	-0.0512517	-0.325097	-0.310577	-0.400639
Adck5	0.250803	-0.693989	0.745086	2.51854	0.66844	-0.332063	-0.658782	1.73891	-0.445442	1.41265	0.619122	-0.408926	-0.595062	-0.784485	0.11263	-0.395879	-0.617005	-0.999185	-1.06768	-1.06768
Adcy3	-0.549653	-1.25669	-0.993525	-1.25669	-0.136483	0.369322	-0.239758	-0.124857	1.28227	0.762773	0.000662696	1.50448	2.74684	-0.805855	0.599624	-0.214479	0.177371	-0.453134	-0.722609	-0.689616
Adcy6	3.32097	-0.408375	0.542881	-0.408375	-0.408375	-0.408375	-0.408375	-0.408375	-0.408375	2.2747	-0.408375	-0.0234712	-0.408375	-0.408375	0.0105513	-0.408375	-0.408375	-0.408375	-0.408375	-0.408375
Adcy7	-1.0748	-1.12295	-1.09415	-0.364317	0.435262	-1.00097	-0.422289	-0.571032	-0.418093	0.679953	2.67724	1.30014	0.576931	0.671443	1.11344	-0.0945269	0.701862	-0.419909	-0.537456	-1.03578
Add1	3.28306	-0.494908	2.14095	-0.742879	-0.294732	-0.191153	-0.422903	0.321639	-0.928478	-0.431023	-0.276039	0.192457	0.328411	-0.64535	-0.137662	-0.6096	-0.24153	-0.467253	-0.259776	-0.123237
Add2	3.08373	0.252627	2.69853	-0.361041	-0.361041	-0.361041	-0.34822	-0.361041	-0.356774	-0.333604	-0.361041	-0.361041	-0.361041	-0.361041	-0.317136	-0.361041	-0.351465	-0.356241	-0.361041	-0.361041
Add3	-1.11094	-1.07798	-1.06383	-0.791239	-0.548839	-0.558959	-0.515686	0.334536	-0.830936	-0.524939	-0.874176	0.460846	1.11687	2.35031	0.544167	1.0672	1.72568	-0.516212	0.152453	0.661671
Adh5	-1.06424	-1.50773	-1.56934	0.860529	1.68526	1.71995	0.69397	0.0370164	0.0809497	1.00777	-0.0632935	0.199802	0.536764	0.0177902	0.409084	0.589555	-0.147365	-0.866652	-1.17667	-1.44315
Adi1	-0.504456	-0.79428	-1.14592	0.244235	1.98231	0.449721	-0.0638086	-0.314143	0.471387	1.63718	1.95818	0.175642	0.979525	-0.785436	-0.144514	-0.341238	-0.398808	-1.11375	-1.14592	-1.14592
Adipor1	0.201226	2.13909	2.99336	-0.462244	-0.431649	-0.724061	-0.671348	0.288232	-0.49417	-0.698741	-0.73657	-0.55527	-0.347601	0.055782	-0.676067	-0.501137	-0.500766	-0.256429	0.312574	1.0658
Adipor2	-0.0901747	-1.78936	-1.68319	1.84195	-0.662465	-0.596068	-0.119436	0.814241	-0.044932	0.948528	2.10551	-0.612473	-0.973513	0.378889	0.627399	0.274072	0.530502	-0.0241492	-0.225387	-0.699936
Adk	0.105903	-0.597995	-0.698747	2.01123	-0.504884	-0.228526	-0.17618	3.2483	-0.138196	-0.013088	1.00862	-0.671887	-0.680298	-0.546397	-0.263466	-0.352452	-0.158024	-0.426089	-0.196671	-0.721153
Adnp	-0.455421	-1.62128	-1.62917	-0.506291	1.08828	0.610684	0.574757	-0.630579	0.149113	1.35951	1.79725	0.432115	1.41926	-0.159803	0.254203	-0.184019	0.375109	-0.871405	-0.436429	-1.5659
Ado	-0.854853	-1.31696	-1.57178	-0.241499	-0.172696	1.88227	0.970882	0.380182	1.07826	1.11101	0.313728	-0.0739352	-0.660157	0.226453	0.588269	1.37704	0.169986	-0.442496	-1.19191	-1.57178
Adora2a	-0.682228	-0.705548	-0.705548	0.556895	1.88284	-0.267312	-0.705548	-0.646825	-0.643714	0.570192	0.661582	2.62992	0.228246	-0.301728	1.48386	-0.611455	-0.657145	-0.675395	-0.705548	-0.705548
Adora2b	-0.536097	-0.536097	-0.536097	-0.536097	-0.536097	-0.430996	-0.479592	2.91523	-0.520014	-0.397974	-0.376445	-0.536097	-0.536097	0.797777	0.728584	0.885506	2.17977	-0.50575	-0.507323	-0.536097
Adora3	-0.527128	-0.527128	-0.527128	0.581412	-0.527128	-0.527128	-0.527128	2.7791	-0.337159	0.0194087	2.83331	-0.527128	-0.527128	-0.477386	-0.010859	-0.257838	-0.0629528	-0.41273	-0.287705	-0.149578
Adpgk	-0.525657	-0.397033	-0.564304	-0.41114	-0.534769	-0.453036	-0.506202	-0.465108	0.015183	-0.470896	-0.110675	-0.484631	-0.164531	-0.356333	-0.423771	-0.467764	-0.506894	1.89839	2.66962	2.25955
Adprh	-1.38673	-1.7261	-1.75821	-1.13763	1.35708	0.754172	1.28493	-0.578634	-0.00365436	-0.22114	-0.415958	-0.329662	-0.190879	0.379766	0.454734	0.354039	1.83183	0.332306	-0.00340294	1.00314
Adprhl2	-0.771586	-1.26207	-1.26207	-0.904107	1.51555	1.05448	0.798247	1.5996	0.215338	1.24374	0.301357	0.113681	-0.901063	0.0734648	-0.296924	0.970531	0.759895	-0.758381	-1.22761	-1.26207
Adrb2	-0.515678	-0.564726	3.0787	-0.204023	-0.444416	-0.600719	-0.538719	-0.790953	-0.777989	-0.547062	-0.136426	-0.39302	0.608225	0.0862115	-0.451117	-0.443514	-0.174724	-0.444105	1.47946	1.77459
Adrbk1	-1.26615	-1.26259	-1.40003	-0.796543	0.156826	1.40044	2.96284	-0.415288	-0.701959	-0.252659	-0.141747	-0.384411	0.764815	0.221928	0.303708	-0.203744	0.108858	-0.0690029	0.10827	0.866435
Adrbk2	-0.725291	-0.757713	-0.757713	-0.364264	-0.757713	-0.739056	-0.757713	0.0931774	-0.0803749	1.16527	0.165237	-0.757713	-0.351344	1.21682	2.9527	1.08002	0.981414	-0.161073	-0.686958	-0.757713
Adrm1	0.917506	-1.92662	-1.46945	0.995668	1.07855	1.46369	1.43427	-0.455836	0.583951	0.0978176	-0.0415445	-0.227609	0.136996	-0.174567	0.142	0.642642	0.380727	-0.679711	-1.32465	-1.57383
Adsl	0.580108	-1.38991	-1.39807	0.0779096	0.654005	1.77438	0.169124	-0.104734	1.70765	1.70344	0.2928	-0.108716	-0.365272	-0.731067	0.175373	0.570312	-0.0783085	-0.980286	-1.29555	-1.25319
Adss	-0.977304	-1.95644	-1.77653	-1.00023	1.64286	1.07722	1.07384	0.250583	0.287449	0.472837	-0.181905	0.212274	-0.713324	0.45565	0.040073	1.07327	1.36241	-0.874567	-0.218979	-0.249187
Adssl1	-1.24236	-1.11821	-1.22006	-0.198334	0.520111	-0.229633	0.163375	0.546112	2.69236	-0.316959	0.18965	-1.20346	-1.12172	1.58261	-0.156741	0.761395	0.553475	0.514733	-0.330955	-0.38539
Aebp2	-0.545652	-1.56754	-1.39287	-0.334728	0.447641	0.260524	0.49005	-0.916207	-0.0793237	1.05489	0.837518	2.52064	0.233311	-0.49399	1.66118	0.124122	-0.330179	-0.307063	-0.91052	-0.751807
Aen	-0.196811	-1.01806	-1.25985	-0.0382442	0.611737	1.17807	-0.753453	-0.0420038	1.43607	1.66965	0.278648	0.153776	1.55241	-0.00528492	0.864243	0.355736	-1.08822	-1.10507	-1.26793	-1.32542
Aes	-0.998055	-1.72281	-1.80043	-0.00157507	0.294371	-0.893638	-0.76759	0.985989	-0.780309	0.532701	0.929238	1.60313	-0.104729	0.105363	1.14951	0.846747	1.3799	0.486287	-0.469498	-0.774613
AF251705	-0.573286	-0.285288	-0.606444	-0.239988	-0.606444	-0.562083	-0.581898	-0.505936	-0.477521	-0.530365	0.704766	-0.490372	-0.260632	3.57649	1.09197	-0.255292	-0.356534	-0.324466	0.15834	1.12498
Afap1	-0.707417	-0.546539	-0.707417	-0.707417	1.11744	0.415235	0.44664	-0.707417	3.65573	-0.176246	-0.454129	0.14635	-0.603749	-0.415872	0.225183	-0.324906	-0.559933	-0.15446	-0.430441	0.489366
Afap1l1	-0.253107	-0.409826	-0.13442	-0.409826	0.173049	-0.284018	-0.409826	0.301696	0.631197	4.03445	-0.409826	-0.409826	-0.409826	-0.320685	-0.409826	0.333805	-0.409826	-0.383703	-0.409826	-0.409826
Aff1	-0.216512	-0.468325	2.01962	-0.537878	2.02314	1.18377	1.39273	-0.202408	-0.54928	-0.798224	0.347727	-0.496228	0.643694	-0.827118	0.105609	-1.42447	-1.03181	-0.301217	0.246143	-1.10897
Aff3	-0.546951	-0.534019	-0.553319	-0.59903	3.60514	0.61543	1.24211	-0.363325	-0.510203	0.627189	0.343198	-0.0857136	0.0653921	-0.579656	0.0761942	-0.578964	-0.555861	-0.569665	-0.592055	-0.505889
Aff4	-1.02511	-1.19153	-1.2481	-0.550372	0.75514	-0.22364	-0.43208	2.86375	-0.812036	1.31642	0.975173	0.319683	0.868602	-0.040145	0.574153	-0.242121	-0.197522	-0.73893	-0.569589	-0.401741
Afg3l1	0.107384	-1.9559	-1.804	-1.1445	0.365098	0.361981	-0.728553	0.872267	1.46866	1.15944	0.839752	-0.658544	0.0986256	0.0533963	1.20829	0.883344	0.858872	-0.411681	-0.742549	-0.83138
Afg3l2	3.27497	-1.40715	0.38821	0.382621	0.358459	-0.165387	-0.280411	0.438005	0.749458	0.934877	-0.505954	-0.014636	-0.422927	-0.0857794	0.0199035	-0.0773572	-0.735149	-0.54427	-0.847439	-1.46005
Afmid	2.31674	-0.415787	3.23192	0.449727	-0.452595	-0.471592	-0.344875	-0.485729	-0.497077	-0.520538	0.301425	-0.00897885	-0.172357	-0.439201	-0.0744821	-0.438239	-0.481147	-0.40585	-0.477668	-0.613692
Aftph	-0.292967	-1.67348	-0.549806	-0.838515	0.87837	1.15246	2.36432	0.780844	-0.87961	1.37778	0.173705	-0.237633	0.96373	0.0569558	0.369133	-0.695502	-0.408318	-1.05593	-0.980535	-0.504996
Aga	-1.17372	-0.994633	-1.4045	3.1237	0.323524	-0.34657	-0.101151	0.489505	0.322702	0.148116	1.50123	-0.284452	-0.285135	0.183467	0.0305627	0.62842	-0.155273	-0.678671	-0.877442	-0.449675
Agap1	0.0427936	-0.349109	-0.546051	-0.510852	-0.722667	-0.626862	-0.722667	-0.635758	0.00537705	-0.147005	-0.555274	-0.656895	-0.4163	-0.204317	-0.307026	-0.230423	-0.158961	2.52579	1.93702	2.27919
Agfg1	-0.381344	-1.72064	-1.90739	-0.487837	0.845234	0.135117	2.20791	-0.799894	-1.07686	0.0856859	0.226459	1.13308	1.64203	0.491783	-0.0385319	-0.255709	0.413441	-0.149198	-0.13611	-0.227214
Agfg2	4.00325	-0.728041	0.0734468	-0.324913	-0.523891	0.149618	0.0444187	-0.103551	-0.388128	0.0095855	-0.244905	-0.0169079	-0.671537	-0.33537	0.247386	0.0209382	0.429288	-0.28746	-0.627274	-0.725949
Aggf1	0.88525	-2.42519	-1.60954	-0.118997	1.70321	1.37004	-0.300916	0.0886168	0.845236	1.03069	0.136517	-0.563312	-0.0965614	0.201922	0.394542	0.412026	-0.333989	-0.0384452	-0.0825718	-1.49853
Agk	-0.423036	-0.803617	-1.03518	-0.568786	1.01002	1.99944	2.17086	0.566303	0.64404	1.56403	-0.649986	-0.264937	-0.702212	-0.35368	-0.619995	0.109712	-0.0127412	-0.705978	-0.889069	-1.03518
Agl	-1.04652	-1.0345	-1.1318	-0.52128	-0.0939627	-0.636244	-0.665183	-0.354957	0.573181	-0.0508688	0.189112	-1.01004	-0.0483635	0.0366049	-0.250146	-0.154476	0.216731	1.25659	2.48247	2.24365
Agpat1	-0.978729	-1.99843	-2.17052	1.00982	0.368541	-0.0611919	-0.211165	0.217314	0.349083	1.28096	0.681579	-0.628523	0.0290534	-0.0176534	1.28685	0.762297	1.22254	0.314243	-0.193177	-1.26288
Agpat3	-0.188791	-0.746541	-0.372254	0.771472	3.31624	0.313016	-0.2656	-0.746541	-0.717566	-0.103323	0.793644	1.17304	0.859261	-0.567435	-0.0984277	-0.630747	-0.643089	-0.694404	-0.705413	-0.746541
Agpat4	3.03731	-0.537236	2.56706	0.0306548	-0.32437	-0.508207	-0.599153	-0.566521	-0.612965	-0.490446	-0.465755	-0.178882	0.0262089	0.359874	0.0895911	-0.276919	-0.0661187	-0.576803	-0.561292	-0.346032
Agpat5	-0.17227	-1.27725	-1.21129	-0.117609	-0.444485	-0.2304	-0.317263	0.304313	1.89762	1.98037	1.14513	-0.0737516	-1.19906	-0.222869	0.659433	1.44507	0.328415	-0.329058	-1.03753	-1.12752
Agpat6	-0.911454	-1.51337	-1.71537	1.88891	1.03085	0.863936	0.531284	-0.452864	1.01572	0.551858	0.450181	-0.590093	-0.35355	0.403693	0.306412	0.813463	0.579238	-0.182633	-1.15364	-1.56258
Agpat9	-0.448274	-0.461648	-0.461648	-0.461648	3.31171	0.764293	2.15644	-0.443239	-0.461648	-0.4175	-0.419659	-0.41803	-0.276868	-0.356317	-0.413919	-0.434289	-0.370033	-0.434852	-0.233758	0.280881
Agps	-1.05581	-1.13023	-1.32606	-0.201611	-0.558929	-0.434231	0.141138	-0.519959	3.01155	-0.304598	-0.303065	-0.87602	-0.31812	-0.0685768	0.518184	0.323057	0.850529	1.33046	1.00815	-0.0858657
Agtpbp1	-0.894675	-1.56401	-1.83116	-0.00209208	-0.584202	-0.103622	0.427214	-0.700163	-0.0761584	-0.127812	-0.168093	-0.876398	1.32748	0.0722148	0.711864	1.84195	2.10987	0.610842	0.0723368	-0.245379
Agtr1a	3.91179	-0.208354	1.4451	-0.312919	-0.312919	-0.312919	-0.312919	-0.312919	-0.292225	-0.312919	-0.312919	-0.312919	-0.312919	-0.268473	-0.312919	-0.312919	-0.242727	-0.312919	-0.277166	-0.312919
Agtrap	-1.07906	-1.14484	-1.35436	-0.815983	0.492509	-0.672917	-0.750207	-0.421984	1.10416	0.756993	1.52765	0.0471656	-1.24064	-0.337322	0.434677	-0.022693	0.441854	1.91651	1.58984	-0.471362
Agxt2l2	0.166611	-1.02667	-1.02667	-0.229806	3.54491	0.241533	-0.80652	0.102244	0.000910153	0.459912	0.298263	0.918394	0.530159	-0.0583986	-0.140281	-0.176715	-0.467664	-0.736878	-0.884023	-0.709316
Ahctf1	2.17548	-1.46137	-0.0753751	-0.520156	0.779326	0.589393	0.254362	1.3265	-0.309292	0.764776	0.337087	0.232552	1.0863	-1.19645	0.792149	-0.488538	-0.744836	-1.11846	-1.27577	-1.14767
Ahcy	-0.0682313	-1.02818	-1.07046	-0.424726	-0.302554	2.04134	1.97997	-0.518671	1.0158	1.24814	-0.683307	-0.275972	-0.240441	-0.679695	0.324578	0.872043	0.794914	-0.824257	-1.05956	-1.10074
Ahcyl1	-0.64481	-1.2553	-1.62438	-0.605683	0.269898	1.44843	1.5866	1.39323	0.425036	1.08661	1.66621	-0.328968	-0.176578	-0.405003	0.367264	-0.122044	-0.355696	-0.560982	-1.10018	-1.06365
Ahcyl2	-0.197241	-0.944993	-0.512165	-0.576938	0.103536	-0.614026	-0.849705	-0.785608	-0.459929	-0.369662	-0.183509	0.738441	0.246921	2.61354	1.50484	0.723903	1.8423	-0.713208	-0.850408	-0.716087
Ahdc1	-0.804041	-0.527032	-0.924208	-0.924208	2.35534	0.390141	2.00901	-0.210119	-0.717116	1.65787	0.711319	-0.200146	0.327899	-0.399892	0.371807	-0.299915	-0.236505	-0.856281	-0.799723	-0.924208
Ahi1	1.83876	-1.15522	0.469395	0.849758	2.82685	0.310599	0.230134	-0.0733329	-0.522634	0.641454	0.252504	-0.365137	-0.037684	-0.926093	-0.400663	-0.802149	-0.576221	-0.555047	-0.983584	-1.02169
Ahnak	-0.653248	-0.655717	-0.66387	-0.523137	-0.651005	-0.612365	-0.621213	-0.65121	-0.66746	-0.321438	1.20196	0.461581	-0.35018	2.36117	1.75388	1.03619	1.55857	-0.660818	-0.678236	-0.663452
Ahr	-0.906422	-0.906422	-0.906422	0.700637	-0.549292	-0.400762	-0.873148	-0.906422	-0.577576	0.603965	1.40335	0.385314	1.35822	0.720452	2.46608	0.358247	0.614353	-0.810414	-0.867319	-0.906422
Ahsa1	-0.123559	-1.62214	-1.54524	-0.213872	0.391593	1.5547	1.62528	-0.325377	1.51489	1.05213	-0.300138	-0.178132	-0.366732	0.298828	-0.0750227	1.18116	0.238706	-0.897277	-1.3789	-0.830878
Ahsa2	0.448447	-1.64606	-1.47278	0.584866	1.93923	0.571663	0.029288	0.592077	1.65453	1.22399	0.0910321	-0.435887	-0.434293	-0.139467	0.282287	0.296341	-0.080397	-0.822545	-1.18397	-1.49836
AI314180	-0.616869	-1.24623	-1.32917	-0.0403475	2.87883	1.28328	1.7188	-0.20894	0.04505	0.76258	0.0226009	-0.485628	0.0505495	-0.255233	-0.764033	-0.22834	-0.303682	-0.466354	-0.723716	-0.0931495
AI314976	2.84634	-1.71217	0.739743	-0.925599	0.594863	0.938083	1.00732	-0.0256589	-0.253345	0.254887	-0.557316	0.626429	-0.0367453	-0.115611	-0.312051	-0.125755	0.0672819	-0.548567	-1.13865	-1.32349
AI316807	-1.90145	-1.9468	-1.66913	0.0416354	0.463231	-0.73527	-0.668701	0.629222	1.21551	0.560186	0.853628	1.14032	-0.228822	0.337199	1.13694	-0.137175	-0.215488	0.112385	-0.311912	1.32449
AI413582	-1.20433	-1.11402	-1.29561	0.663324	-1.10086	-1.11945	-0.830022	0.690736	0.277898	-0.430815	1.20104	0.358708	0.345796	1.9702	0.59854	0.92711	1.1314	0.692923	-0.571245	-1.19132
AI462493	-1.20592	-1.60438	-1.72032	-0.119076	2.66295	-0.336392	0.187807	1.43255	0.432754	0.448237	0.253944	0.798661	0.568296	0.413508	-0.197235	-0.127591	-0.128278	-0.658792	-0.479161	-0.621567
AI467606	-1.44672	-1.7894	-1.01113	-0.874743	-0.0164379	-0.344371	0.0223016	1.64885	-0.788207	0.15272	1.45418	0.300938	-0.283216	-0.178642	0.954912	-0.483411	-0.334151	0.117385	0.882125	2.01702
AI504432	-0.991737	-1.06331	-1.06331	-0.551428	0.147322	1.17195	1.06457	0.817962	-0.914387	2.08324	0.450113	0.331273	-0.148719	-0.322276	1.79587	-0.245124	0.490579	-0.949502	-1.0398	-1.06331
AI597468	-0.651843	-0.881839	-1.09533	1.79842	1.6678	1.57574	2.19751	-0.134866	-0.105239	-0.0115825	-0.0589246	-0.574659	0.22742	-0.856674	-0.240526	-0.322163	-0.251156	-0.435847	-0.955653	-0.890589
AI607873	-0.4571	-0.426871	-0.492688	-0.492688	-0.492688	-0.478961	-0.489342	-0.492688	-0.479651	-0.36884	0.550638	-0.457637	-0.492688	3.37453	1.08983	0.380072	1.63319	-0.476348	-0.488922	-0.441152
AI662270	0.272936	0.730822	1.93858	1.87071	-0.0586521	-0.0473348	-0.846912	0.693108	0.925987	0.427866	0.784004	-1.07466	-0.870993	-0.225105	-0.00836009	0.267758	-0.627628	-1.17719	-1.3561	-1.61883
AI837181	-0.378096	-1.43367	-1.03031	-0.178019	1.78099	-0.0854218	-0.765273	-0.292775	-0.753103	1.23777	1.94581	1.5762	-0.132396	1.03432	0.481446	-0.302421	-0.430941	-0.967694	-0.878883	-0.427539
AI848100	0.0289656	-1.42265	2.67311	2.46191	-0.500952	-0.971433	0.0963626	-0.294095	-0.0342105	0.0946177	0.036602	0.181127	0.667315	-0.69805	-0.118627	-0.467082	-0.722519	-0.706745	-0.46933	0.165684
AI848285	-0.353953	-0.366244	-0.366244	0.370999	-0.366244	-0.366244	-0.366244	-0.366244	-0.319429	2.19573	-0.366244	-0.366244	3.4482	-0.366244	-0.214131	-0.366244	-0.366244	-0.366244	-0.366244	-0.366244
AI987944	-1.34177	-1.61214	-1.61214	-0.674211	1.53472	-0.015873	0.275421	0.279625	-0.0963576	-0.157603	1.42297	0.162268	1.65363	0.216074	1.0059	-0.793901	-0.00163608	-0.91353	-0.523291	1.19183
Aida	1.31864	-1.61254	-1.22338	-0.998411	1.17816	0.681743	1.14224	1.17179	-0.576651	0.122193	-0.243604	-0.462396	1.24752	0.317821	0.17013	0.938879	0.330857	-0.76154	-1.3462	-1.39526
Aif1	-0.587542	-0.0679474	-0.456126	-0.157597	-0.530398	-0.64181	-0.627828	-0.55209	-0.567914	-0.0735553	-0.36228	-0.505464	-0.581905	2.70052	2.02768	1.27784	1.40402	-0.52352	-0.586748	-0.587345
Aifm1	0.3573	-1.27438	-1.32718	-0.0650547	2.43256	1.3569	1.15985	0.221387	0.81528	0.273383	-0.395199	-0.571915	-0.937777	-0.496093	-0.321532	0.832824	0.64999	-0.446333	-1.13778	-1.12622
Aig1	-0.354331	-0.723023	-0.723023	1.65166	0.64236	-0.409698	-0.723023	-0.723023	-0.309047	3.17903	0.608864	0.0636612	0.189348	-0.429808	0.872776	-0.0566116	-0.587045	-0.723023	-0.723023	-0.723023
Aim1	-0.561766	-0.7056	-0.780609	-0.498781	-0.438734	-0.439063	-0.327611	-0.780609	-0.75307	-0.59425	-0.180851	2.92244	0.666775	2.0978	0.362083	0.243293	1.00853	-0.738264	-0.318726	-0.182981
Aim2	-0.357916	-1.21702	-0.941389	-0.591383	2.98279	0.0259331	-0.0567556	-0.192209	-0.548249	0.231888	0.779027	-0.389032	0.572093	1.09146	0.350176	0.244021	1.09624	-1.11227	-1.10496	-0.86244
Aimp1	-0.341546	-1.63406	-1.56952	-1.08709	1.90892	1.05609	0.837549	-0.0887648	0.474002	1.13421	0.456546	0.143889	0.527496	0.602088	0.56683	0.446349	0.0292165	-0.7931	-1.28013	-1.38897
Aimp2	0.655137	-1.37258	-1.05043	0.552677	-0.32047	1.91935	1.08981	-0.393798	1.22535	1.65956	-0.552437	0.576795	-0.662375	-0.677732	0.402932	0.314841	-0.10419	-0.51151	-1.23539	-1.51555
Aip	0.687678	-2.1482	-0.760381	-0.934045	1.24104	-0.104678	1.98401	-0.478122	-0.818472	-0.697197	-0.360329	0.736539	-1.16066	0.769796	-0.263871	-0.565175	0.790006	1.1767	0.744271	0.1611
AK010878	0.379269	-1.50665	-1.39467	-1.20114	0.387525	1.88468	2.34388	0.968676	-0.120393	0.27177	-0.238957	-0.222123	-0.108111	-0.151392	0.845386	0.363628	-0.219744	-0.392003	-0.931514	-0.958121
Ak2	-0.16114	-1.59351	-1.61381	-1.00138	-0.246662	1.43689	0.942195	-0.236545	2.03138	1.03099	-0.692025	-0.827338	-0.119099	-0.601573	-0.068806	0.177272	0.0204409	1.35512	0.83963	-0.672025
Ak3	-0.321998	-0.935283	-0.837534	0.324644	3.38191	0.919187	1.03329	-0.327625	-0.271527	0.921172	0.344244	-0.477087	-0.209115	-0.104638	-0.195577	-0.201257	-0.68756	-0.69479	-0.726255	-0.934197
Ak8	-0.389917	-0.563335	-0.563335	-0.312836	-0.563335	-0.563335	-0.563335	-0.563335	-0.526006	-0.0344118	3.1729	-0.456688	-0.299057	0.485154	1.9707	0.317537	1.05795	-0.47863	-0.563335	-0.563335
Akap10	-0.0630246	-1.77584	-1.34427	-0.549859	0.932506	-0.00803301	-1.05824	0.639213	0.309335	1.83517	0.591904	-0.371882	-1.65714	0.748876	1.41065	0.780098	0.930515	-0.431132	-0.501026	-0.417824
Akap11	0.170314	-1.30139	-1.38513	0.400411	-0.458795	0.659944	0.745262	-1.2482	-0.268274	1.72284	1.91023	-0.214549	0.0837279	-0.306044	1.73025	0.00706689	-0.270773	-0.000286087	-0.448591	-1.52801
Akap12	-0.424999	-0.379069	-0.426223	-0.419248	2.67823	1.5001	2.60586	-0.384001	-0.428288	-0.396474	-0.392602	-0.392762	-0.136554	-0.432916	-0.436411	-0.422011	-0.423517	-0.420341	-0.432363	-0.436411
Akap13	-0.815164	-1.14795	2.59169	-0.750012	1.24992	-0.671296	-0.523972	0.308915	-1.14006	0.586287	-0.309924	0.016843	0.763214	1.45137	0.219746	-0.334035	0.502392	-1.45529	-0.624358	0.0816949
Akap17b	-0.602642	-0.92716	-0.92716	3.02565	-0.220721	1.01563	0.410951	-0.0866087	-0.349249	0.307985	-0.187743	1.08222	1.09517	-0.67265	0.578399	-0.744028	-0.0367865	-0.906938	-0.92716	-0.92716
Akap7	0.992274	0.433987	3.95205	-0.109145	-0.0765637	-0.35123	-0.509824	-0.313731	-0.40111	-0.0361121	-0.0864288	-0.496761	-0.526219	-0.106088	-0.253627	-0.41359	-0.238054	-0.513149	-0.453389	-0.493289
Akap8	-0.370235	-1.52715	-1.60789	-0.725943	1.34095	1.34679	1.26699	0.894429	-0.0683372	1.11255	0.371487	0.227334	0.247356	-0.150258	1.15503	0.207567	-0.177432	-0.740394	-1.4171	-1.38574
Akap8l	0.555508	-1.0182	0.58077	0.39481	2.14826	0.21252	-0.333929	2.28671	-0.880134	0.23851	-0.202576	0.189707	1.07839	0.0430977	-0.559987	-0.658327	-0.797675	-1.31767	-0.825663	-1.13412
Akap9	-0.904391	-1.26942	-1.37064	1.51189	2.16096	0.316774	0.381293	-0.395359	-0.201041	1.01303	1.29335	0.477303	0.253265	-0.238428	0.802511	-0.23369	-0.546864	-0.776193	-0.964502	-1.30986
Akirin1	-0.838675	-1.61453	-1.6927	2.9074	1.25017	1.16762	0.491276	0.377067	-0.319031	-0.6467	-0.163138	-0.0567888	0.107895	-0.0385245	0.237341	-0.160358	-0.479437	-0.426364	-0.0521091	-0.050409
Akirin2	1.36212	-1.23749	0.43489	-0.585855	1.29184	0.472757	2.3186	-0.202593	-0.579083	0.187627	-0.607163	-0.291845	-0.771142	-0.0271373	0.548015	-0.365381	1.36938	-0.635635	-1.1953	-1.48662
Akna	-1.13088	-1.34929	-1.47287	-0.707822	1.42382	-0.212267	0.28347	-0.834806	-1.15468	-0.6159	-0.636989	1.2902	1.85639	1.1566	0.510611	-0.114755	0.350455	-0.26567	0.695692	0.928683
Akr1a1	-0.932104	-1.29129	-1.36299	-0.0410471	0.649742	0.349135	0.303535	0.0112713	0.0928648	0.327408	0.480881	-0.478368	-0.310665	1.59675	0.886649	1.66621	1.67545	-1.20205	-1.20705	-1.21433
Akr1b10	-0.77033	-0.797575	-0.896218	1.74972	3.01702	0.128416	0.562387	-0.708002	0.413873	1.1931	-0.487261	-0.243345	-0.578419	0.109492	-0.46287	-0.106599	0.000215169	-0.667864	-0.734594	-0.721148
Akr1c13	-0.64799	-0.723731	-0.680761	-0.814149	-0.0871103	-0.391215	-0.685719	2.91753	0.02143	1.07321	-0.430313	1.15822	-0.814149	0.905419	-0.390785	1.13732	0.69896	-0.678772	-0.753243	-0.814149
Akr1e1	-0.583585	-0.773441	-0.797338	0.766734	3.16611	0.349121	-0.485916	-0.602151	0.32375	1.82101	-0.089004	0.247902	-0.132257	-0.106983	-0.101927	-0.208663	-0.0525002	-0.95965	-0.95965	-0.82157
Akr7a5	-0.689521	-1.0279	-1.33832	-0.474679	0.897765	0.911676	-0.498486	-0.743822	0.606004	1.38667	0.526291	0.52832	1.44704	0.791136	1.52731	0.433396	-0.579391	-1.13522	-1.32733	-1.24093
Akt1	-0.998463	-1.25135	-1.53267	-1.00904	-0.319243	1.75407	2.38726	-0.426937	-0.13234	0.773956	-0.426284	-0.455178	-0.844262	0.782921	0.082569	0.834392	0.789366	-0.402805	-0.0404635	0.434503
Akt1s1	-0.0534583	-1.36324	0.120948	-1.06857	2.02126	0.279832	0.389721	-0.602539	0.929364	2.37813	0.749525	-0.222145	-0.115331	-0.232679	-0.0825234	0.459273	-0.248787	-0.908799	-1.06049	-1.36949
Akt2	-0.935564	-1.60656	-1.75861	1.17841	-1.19206	-0.425384	0.657638	-0.711953	-0.296026	1.36766	0.24323	0.401564	1.18152	-0.018294	0.561641	-0.115803	0.00570464	-0.381816	-0.254519	2.09922
Akt3	-0.68174	-1.00042	-0.764724	-0.876793	1.93042	0.405167	0.672248	-1.03126	-0.298	0.842357	0.306444	0.108033	0.288202	0.0216062	2.51055	-0.333799	0.737342	-0.636328	-1.04546	-1.15385
Aktip	-0.957629	-1.11145	-1.22257	1.24731	3.18336	0.0314217	-0.0747001	-0.711835	-0.288465	0.187778	1.34765	-0.288022	-0.571603	-0.605842	-0.12488	-0.454567	-0.121192	-0.0867618	0.33176	0.29023
Alad	3.91025	-0.373355	1.37726	0.0889778	-0.262631	-0.199236	-0.292849	-0.147165	-0.29706	-0.212614	-0.341518	-0.323658	-0.238117	-0.397618	-0.350488	-0.334749	-0.382829	-0.396291	-0.421001	-0.405318
Alas1	-0.496419	-0.504758	-0.491371	-0.384433	-0.391085	-0.342817	-0.421305	-0.151726	4.07865	-0.250036	-0.296007	-0.412364	-0.42536	-0.103085	-0.327943	0.141696	0.0979143	0.589685	0.079899	0.0108619
Alas2	0.964653	2.67604	2.89661	-0.384175	-0.398246	-0.391402	-0.39619	-0.386729	-0.396304	-0.356278	-0.376347	-0.337557	-0.378389	-0.384138	-0.386006	-0.393874	-0.390023	-0.392147	-0.392202	-0.397294
Alcam	-0.850581	-0.762931	-0.783096	1.48005	-0.855823	-0.80686	-0.827039	-0.767268	0.180943	0.190472	1.17959	-0.76583	-0.293438	0.80724	2.85392	-0.118809	0.959842	-0.00496387	-0.543866	-0.271554
Aldh16a1	-0.313327	-1.54015	-1.02066	-0.667092	0.947174	0.503478	1.41932	-0.348675	0.44616	1.30701	-0.917187	-0.688866	-0.262279	0.369506	0.376453	1.01205	2.12573	-0.702075	-0.855799	-1.19077
Aldh18a1	0.577713	-0.725264	-0.823987	3.56593	0.847798	0.372012	-0.0236474	0.159255	0.346331	0.755494	-0.373971	-0.0795585	-0.24987	-0.522142	-0.721813	-0.269339	-0.462189	-0.72478	-0.823987	-0.823987
Aldh1a1	1.93322	2.53561	2.44901	-0.428904	-0.428904	-0.428904	-0.428904	-0.389512	-0.418065	-0.282114	-0.398383	-0.379109	-0.428904	-0.42357	-0.397638	-0.427336	-0.417914	-0.415974	-0.423961	-0.399748
Aldh1b1	-0.800842	-0.914649	-0.770743	-0.383958	2.37393	0.309632	1.19367	-0.791464	-0.262642	-0.424808	0.861261	-0.726266	-0.440346	0.384443	0.0527299	1.64611	1.40509	-0.881844	-0.914649	-0.914649
Aldh2	-1.09952	-1.05983	-1.23209	-1.24333	0.140934	-0.394416	-0.414975	0.23711	0.581154	0.0706455	-0.398662	-1.1784	-0.0492068	0.835343	-0.673227	0.349604	0.269772	1.70382	2.38522	1.17006
Aldh3a2	-1.4785	-1.50811	-1.56156	2.51916	0.338068	-0.661209	-0.0559197	0.389919	-0.68563	-0.751644	0.446963	0.0482916	-0.724102	0.464771	0.460585	-0.0931563	0.0749817	0.49857	1.14198	1.13654
Aldh3b1	-1.00469	-0.791572	-0.934172	1.39866	0.309101	-0.929485	-0.855034	-1.02535	-0.456361	-0.901453	0.182862	-0.950065	-0.329457	1.02156	-0.612952	0.301399	1.09631	1.13414	1.4187	1.92787
Aldh7a1	0.187549	-0.727392	-0.727392	3.67915	0.638525	0.242976	-0.381239	-0.608342	0.0636284	0.824475	-0.19537	-0.0724048	0.759449	-0.611407	-0.354897	-0.312908	-0.443643	-0.625041	-0.608325	-0.727392
Aldh9a1	-0.447111	-1.40482	-1.29283	2.01591	0.170368	0.838228	0.424411	0.00112231	1.00224	0.245132	-0.491057	-0.876463	-0.353099	0.11203	0.74386	1.64724	0.924796	-0.647671	-1.21968	-1.39259
Aldoa	-1.20051	-1.11085	-1.34103	-0.184584	-0.781348	-0.849848	-1.24531	1.22393	1.30419	-0.28427	-0.687902	-0.354437	0.0381809	0.870086	-0.81612	1.38895	0.877887	0.623302	1.17101	1.35869
Alg1	-0.802487	-1.20301	-1.29551	2.59315	-0.271439	-0.4199	-0.250582	-0.832741	1.11353	-0.107563	0.351311	0.183706	-0.105084	1.28762	0.645323	1.18527	0.498395	-0.540973	-0.989065	-1.03994
Alg11	-0.226982	-1.0931	-1.0931	3.14572	1.27548	-0.520742	0.991215	0.128815	0.347511	0.264601	-0.630385	-0.297221	0.857787	-0.188279	0.0297346	-0.115328	-0.424968	-0.738289	-0.619379	-1.0931
Alg13	0.0901121	-1.46655	-1.60243	-1.07385	2.00816	1.06034	1.46607	0.422348	0.61314	0.133293	-0.614886	-0.0505214	-0.347943	-0.284527	0.0910395	1.01822	0.744623	0.0911	-0.695312	-1.60243
Alg14	0.0927554	-1.27985	-0.609799	3.31966	0.807171	-0.759465	0.0753912	-0.335065	0.473335	-0.0125441	0.513974	-1.07999	-0.184491	0.174663	0.0677985	0.138052	0.948785	-0.51586	-1.02478	-0.809754
Alg2	-0.400117	-0.736079	-0.62017	3.80817	0.218716	-0.116959	-0.181179	0.48801	-0.104954	0.310088	1.04329	-0.378276	-0.0788759	-0.495489	-0.0877367	-0.444731	-0.481926	-0.54245	-0.463248	-0.736079
Alg3	-0.235061	-1.47771	-1.01604	2.91982	0.69068	0.922636	-0.0466475	0.412204	0.687286	0.166646	0.436068	0.233422	-0.467514	-0.236399	0.293009	0.296286	0.0754743	-1.03062	-1.33177	-1.29176
Alg5	-0.865813	-1.04226	-1.10283	3.48544	-0.173835	-0.38182	-0.163509	0.172279	0.618961	0.138801	0.78495	0.292695	-0.155669	0.0567637	0.246499	0.46602	0.125421	-0.650707	-0.877759	-0.973625
Alg6	0.370385	-1.06819	-1.35859	2.21582	0.502347	0.439433	1.56705	0.865439	0.622392	0.187575	-0.24422	-1.07036	-0.609393	-1.00678	0.861526	-0.101726	0.282627	0.167046	-1.26378	-1.35859
Alg8	0.316515	-1.07519	-1.22508	1.5734	-0.871872	-0.0897438	0.385156	0.254879	0.925314	0.644123	-0.215611	-0.773161	-0.979392	-0.496874	1.14161	1.04593	2.13661	-0.478626	-1.19019	-1.0278
Alg9	1.60945	-0.493897	2.90609	1.69003	-0.108823	-0.428546	-0.832269	-0.0632385	0.188191	0.0826481	0.534773	-0.373342	-0.333521	-0.470685	-0.604458	-0.18799	-0.333517	-0.693274	-1.04148	-1.04613
Alkbh2	0.176426	-1.14758	-1.14758	1.63086	1.60132	0.799442	-0.845736	-0.0594717	0.256327	1.07186	1.56633	0.905134	0.264898	-0.575873	-0.316828	0.159529	-0.933624	-1.14758	-1.11028	-1.14758
Alkbh3	-1.11121	-1.75365	-2.09509	0.601893	0.789732	0.198191	1.13151	1.13589	0.325974	0.646384	-0.0343467	0.0947892	0.588483	1.00666	1.20921	0.0182916	0.235193	-0.701061	-0.837872	-1.44897
Alkbh4	-0.262958	-1.38295	-0.95035	0.346912	-0.4399	-0.139215	0.0532401	3.85446	-0.010741	-0.171067	0.0754981	0.483366	0.201271	-0.304147	-0.347751	-0.232135	-0.142572	0.102142	-0.214615	-0.518484
Alkbh5	0.716836	-1.68461	-1.11703	1.30216	2.16944	1.48536	0.53679	-0.277619	-0.0788778	0.766179	0.360667	-0.282919	0.204134	-0.150979	0.132624	-0.141997	-0.625769	-0.547098	-1.35679	-1.4105
Alkbh6	-1.17138	-1.27747	-1.3624	1.78511	-0.482491	0.242413	-0.0790002	1.72385	0.341054	0.941945	1.03387	0.996484	0.877308	0.131633	0.247682	-0.227798	-0.498516	-1.05944	-1.01747	-1.14538
Alkbh7	0.292606	-2.02349	-1.4925	0.672544	0.375192	-0.284738	0.144161	0.624592	0.323029	0.165097	1.32051	-0.496705	1.46974	0.00961068	1.00915	0.839538	0.83224	-1.21563	-1.13761	-1.42732
Alkbh8	3.18784	-0.89811	0.909048	-0.89811	1.28277	0.474922	0.58538	-0.240505	0.198085	0.391967	-0.725916	-0.50548	0.307067	-0.497978	0.0825968	-0.434848	-0.81358	-0.686785	-0.820257	-0.89811
Alox15	-0.224221	-0.227033	-0.227033	-0.227033	-0.227033	-0.215841	-0.227033	4.24836	-0.227033	-0.227033	-0.227033	-0.227033	-0.227033	-0.227033	-0.227033	-0.218786	-0.227033	-0.222459	-0.227033	-0.188593
Alox5	-0.493318	-0.406896	-0.463854	-0.434359	-0.45693	-0.472422	-0.497781	3.56591	-0.313086	-0.335596	-0.434795	-0.368327	-0.188777	-0.332587	-0.465703	-0.467549	-0.460334	0.513035	1.11342	1.39995
Alox5ap	-0.895109	-0.817303	-0.874345	-0.896539	-0.780956	-0.88119	-0.900463	1.92457	-0.262328	-0.485439	0.0958927	-0.872964	-0.682232	1.62525	0.299655	0.433144	0.626558	0.175211	1.30315	1.86543
Alox8	-0.249364	-0.249364	-0.249364	-0.249364	-0.249364	-0.249364	-0.249364	4.24112	-0.23335	-0.249364	-0.152732	-0.0110995	-0.249364	-0.138963	-0.249364	-0.233358	-0.249364	-0.229883	-0.249364	-0.249364
Alpl	-0.481294	-0.481294	-0.481294	2.58449	0.39509	2.49273	1.64525	-0.314081	-0.481294	-0.371116	-0.481294	-0.481294	-0.251211	-0.481294	-0.405631	-0.481294	-0.481294	-0.481294	-0.481294	-0.481294
Als2cl	-0.328468	-0.328468	-0.328468	-0.328468	4.04855	-0.328468	-0.328468	-0.328468	-0.328468	-0.258847	-0.228667	1.00276	-0.328468	-0.0624747	0.0463377	-0.307231	-0.328468	-0.298805	-0.328468	-0.328468
Als2cr4	-0.883501	-0.727528	-0.962068	-0.962068	0.384582	-0.485996	-0.744543	2.02724	0.83088	2.29315	-0.448373	0.7647	-0.0187288	-0.459494	0.873078	0.830648	0.296938	-0.71711	-0.929739	-0.962068
Alyref	1.19848	-1.13553	-0.98068	-0.778224	-0.305418	1.67582	2.03606	-0.649347	-0.374065	0.810901	-0.305402	-0.476697	-0.602902	-0.443158	0.979091	0.636227	1.23317	-0.22748	-1.15723	-1.13362
Alyref2	-1.06676	-1.29157	-1.05689	0.29898	1.11356	1.18087	1.57899	-0.347997	-0.487281	-0.173829	2.26199	-0.393386	-0.00140676	0.209887	0.845549	0.0772889	0.366552	-0.891803	-0.979553	-1.24317
Ambra1	-0.468116	-1.29271	-0.484283	3.87491	0.191532	-0.717559	-0.111044	-0.151967	-0.158433	-0.160985	0.156552	-0.110769	-0.0574344	0.39508	0.478965	-0.123414	0.0622352	-0.790779	-0.339679	-0.1921
Amdhd2	-1.12806	-1.15753	-1.53551	-0.733871	0.331897	-0.222881	-0.487493	1.13798	1.81766	0.0728927	-0.230748	-1.0798	-0.133626	0.795881	0.574887	1.36122	1.78878	0.130877	-0.220918	-1.08165
Amfr	1.30295	-1.94013	-1.01101	1.40078	-0.0783393	-1.12778	-0.94053	0.664417	-0.297574	-0.375477	1.69391	-0.255318	-0.578737	-0.333559	0.937532	-0.374569	-0.442331	-0.206427	0.220516	1.74167
Amica1	-0.513356	-0.472253	-0.533917	-0.318099	-0.470121	-0.479588	-0.526339	-0.443933	-0.529615	-0.273592	3.30683	0.144001	0.0382733	-0.172405	1.00017	-0.410389	-0.398036	-0.506856	-0.457319	2.01654
Amigo2	-0.160785	-0.251514	-0.251514	4.24137	-0.251514	-0.251514	-0.251514	-0.251514	-0.251514	-0.251514	-0.251514	-0.0290747	-0.251514	-0.251514	-0.251514	-0.17057	-0.251514	-0.131535	-0.228208	-0.251514
Ammecr1	1.69758	-1.00587	1.58599	-1.00587	0.642763	1.31352	2.50828	-0.155606	-0.509866	-0.44452	-0.512353	-0.564315	0.164169	-0.489255	-0.429669	-0.622164	-0.487542	-0.700551	-0.359604	-0.625129
Ammecr1l	-0.478585	-1.44324	-1.34994	-0.000508316	0.724685	1.28606	1.32511	0.431646	0.576089	1.04034	0.251901	-0.702563	0.0298841	-0.0180957	0.579808	0.585028	1.19451	-0.687231	-1.12467	-2.22023
Amn1	-1.41661	-1.62115	0.97053	0.683784	1.27083	-0.0487875	0.533645	-1.62154	-0.410108	0.0679884	0.476323	0.0716521	0.290256	-0.512642	-0.104029	-0.208751	-0.00400082	-0.662945	-0.403156	2.64871
Ampd2	-0.889993	-0.83497	-1.20374	-0.93947	1.16389	0.677555	-0.371495	1.48139	2.72094	0.963115	-0.722262	-0.463685	-0.446837	-0.460797	-0.159122	0.369006	-0.642323	0.598297	-0.0531758	-0.78632
Ampd3	2.60113	-0.936832	0.540871	-1.04661	-0.599729	-0.930044	-0.933653	0.331813	-0.69065	-0.8478	-0.57345	-0.888305	-0.223317	1.05266	-0.329948	-0.0335075	0.176104	0.582005	1.50008	1.24917
Amz1	-0.420169	-0.448438	-0.448438	0.151867	0.173015	-0.410861	-0.448438	-0.214892	0.00702052	0.0266824	-0.329483	-0.448438	-0.448438	0.661239	4.04698	0.078882	-0.221294	-0.409915	-0.448438	-0.448438
Amz2	-0.655343	-1.24144	-1.44524	2.64684	0.857747	-0.165087	-0.289784	0.292193	0.0380589	1.03109	0.411296	1.19661	-0.91907	-0.265399	1.08466	-0.259732	0.171878	-0.599967	-0.902369	-0.986948
Anapc1	0.63784	-1.64334	-1.6172	0.65678	1.72509	1.08251	1.03768	-0.232614	0.271156	1.06789	-0.635023	-0.506838	-0.231958	0.116091	0.174066	0.430347	0.991276	-0.534666	-1.0393	-1.74979
Anapc10	0.00029395	-1.56844	-1.14783	-0.711215	1.32099	1.38706	2.39227	-0.239137	0.347561	0.148853	0.498311	0.0104565	0.301154	-0.157937	0.171425	-0.0906777	0.745284	-0.728256	-1.18921	-1.49095
Anapc11	-0.603789	-1.52676	-1.60056	-1.19304	-0.730411	-0.110183	0.448192	1.64908	0.360688	0.426104	0.392547	0.418929	-0.0382655	0.051694	1.21932	1.38531	1.34686	0.452408	-1.05879	-1.28933
Anapc13	-0.499324	-2.00633	-1.91933	0.747575	0.877079	0.323631	0.724429	-0.114414	1.24474	0.613986	0.123332	-0.831328	0.0565548	0.571949	-0.143611	1.3346	1.21398	-0.0137243	-0.853315	-1.45047
Anapc16	0.292157	-1.57073	-0.546935	-0.630517	2.91342	0.611539	0.148672	0.333215	-0.409806	0.229876	0.611512	-0.0670895	0.379867	-0.338359	1.52478	0.0883262	-0.404992	-0.881387	-1.05031	-1.23324
Anapc2	0.345304	-1.26833	-1.66378	0.733708	2.23799	1.15913	1.53171	0.530011	-0.287272	0.532729	-0.263565	-0.642684	-0.537528	-0.426845	0.787031	-0.141086	0.317443	-1.09189	-1.02356	-0.828511
Anapc4	-0.61846	-2.23834	-1.67177	0.0991579	0.855709	0.802743	1.75777	-0.0797147	0.360958	0.801621	1.14523	-0.529306	0.69343	-0.296054	-0.81847	0.614991	1.02608	-0.699805	-0.801885	-0.403884
Anapc5	1.48554	-1.30174	-0.98856	0.143466	-0.372679	1.38023	2.4415	-0.337086	0.191255	0.254748	-0.0342307	-0.677884	-0.441475	-0.771352	0.345992	0.388935	0.962982	-0.0546228	-1.23748	-1.37754
Anapc7	-0.0397953	-1.40505	-0.492752	-0.468369	2.35956	1.04399	2.01142	0.680698	-0.0280761	0.47877	-0.581639	-0.909315	-0.0551965	-0.589448	0.629986	7.68668e-05	0.290629	-0.522836	-1.26734	-1.13532
Angel2	-0.639954	-1.47646	-1.34312	-0.335163	2.79454	0.736439	1.89389	-0.208175	-0.379244	0.582475	0.104025	-0.355571	0.587156	0.00680803	0.306712	-0.280927	-0.0699242	-0.340214	-0.7849	-0.798381
Angpt1	-0.324421	-0.341513	-0.341513	-0.341513	-0.341513	-0.311197	-0.341513	2.28888	-0.265714	3.45154	-0.296966	-0.253383	-0.297561	-0.327283	-0.254452	-0.33582	-0.341513	-0.341513	-0.341513	-0.341513
Angptl7	-0.226707	-0.226707	-0.226707	-0.226707	-0.226707	-0.226707	-0.226707	-0.226707	-0.226707	-0.226707	4.24816	-0.226707	-0.226707	-0.226707	-0.226707	-0.226707	-0.226707	-0.167438	-0.226707	-0.226707
Ank	3.12823	0.0185425	2.14969	-0.452106	-0.717155	-0.696163	-0.637488	-0.0381477	-0.536603	0.467124	-0.407711	-0.0858347	-0.445864	-0.0974858	0.700002	0.110573	-0.373069	-0.676353	-0.693019	-0.717155
Ank1	3.41698	0.0181627	2.31793	-0.348414	-0.348414	-0.348414	-0.348414	-0.348414	-0.329138	-0.312569	-0.310134	-0.297561	-0.348414	-0.344778	-0.348414	-0.342428	-0.337691	-0.343039	-0.348414	-0.348414
Ankfy1	0.0225301	-1.60549	-0.374526	-0.763107	1.47706	-0.1488	0.0984247	-0.928901	-0.972715	0.0941918	0.0681945	-0.559715	2.62833	1.27348	1.35077	0.0666146	-0.0850962	-0.713238	-0.613136	-0.314879
Ankhd1	0.302027	-1.68309	-1.53515	0.535264	1.55811	0.0658664	0.859008	-0.106518	-0.627617	0.776007	0.92736	0.52945	1.97388	-0.314058	0.333519	0.0363013	-0.189167	-1.02975	-1.16089	-1.25055
Ankib1	-0.627358	-1.3128	-1.16611	0.800714	1.17843	0.0661503	-0.247965	0.0449511	-0.620602	0.549723	2.96905	0.901673	-0.183425	-0.0370037	0.874575	-0.524484	-0.232281	-0.754749	-0.875059	-0.803438
Ankle1	1.79076	-0.620139	0.112504	-0.654549	-0.654549	0.286606	3.25115	-0.384747	-0.274741	-0.393569	-0.59613	-0.606028	-0.55473	-0.654549	0.973016	-0.183418	0.512025	-0.0848607	-0.609507	-0.654549
Ankle2	-0.164578	-1.35174	-1.21535	-0.147669	0.261179	0.780724	0.278637	-0.88604	-0.648649	0.399699	1.3624	-0.257066	-0.113883	1.9936	1.76034	0.659039	0.616203	-1.01236	-1.16428	-1.15021
Ankra2	0.649971	-1.48389	-1.49362	-1.09188	0.186074	-0.0487874	0.0350329	2.18058	-0.505645	0.293303	0.781255	1.84753	0.896341	0.235897	0.692885	-0.390752	-0.185468	-0.894498	-0.765031	-0.93929
Ankrd10	-0.851717	-1.07698	-1.25321	-0.786349	0.970775	1.50162	1.83863	0.174268	0.568857	1.80291	0.276337	0.0886127	0.329015	-0.440851	0.559279	0.0910191	-0.410866	-0.934531	-1.22277	-1.22406
Ankrd11	-0.172033	-1.56201	-1.00921	-0.392786	1.75675	1.28186	1.61374	-0.553647	-0.820095	0.390186	1.00883	1.0493	0.449676	-0.150016	0.827137	-0.203765	-0.135549	-1.12425	-1.14873	-1.10538
Ankrd12	-0.90435	-1.57256	-1.37247	0.801746	0.766908	0.087906	0.538797	2.67242	0.304958	-0.364555	1.15412	0.0289389	0.098627	-0.679478	-0.681701	-0.924164	-1.05873	0.539051	0.625028	-0.0604977
Ankrd13a	-0.223104	-1.88413	-1.80259	-0.741324	0.773361	0.561885	1.05224	0.976876	0.384019	2.4293	0.354607	-0.662183	-0.686481	-0.582303	0.653939	0.242703	0.393493	-0.233843	-0.504768	-0.501694
Ankrd13c	0.158758	-1.24475	2.34321	0.375185	-1.57342	0.789423	-0.0496617	0.157555	-0.0929183	-0.595068	1.02483	-0.810118	1.88601	0.345285	-0.312473	0.443271	-0.0521855	-0.802585	-0.978164	-1.01218
Ankrd16	-1.5645	-1.70633	-1.47356	-0.530278	0.3307	-0.0799531	2.20905	1.63421	-0.315508	-0.213378	-0.564738	0.65596	-0.449718	0.524547	0.768889	-0.301808	1.07291	-0.158228	-0.29242	0.454155
Ankrd17	0.452811	-1.76422	-1.51632	0.553573	1.17359	1.05593	0.327659	-0.103373	-0.502536	2.10299	0.623121	0.720125	0.546959	-0.355142	0.12168	0.030388	0.0413614	-0.800527	-1.09512	-1.61295
Ankrd22	-0.418849	-0.365177	-0.453425	-0.453425	-0.278272	-0.423642	-0.43066	-0.453425	-0.340693	-0.438285	-0.324123	-0.435909	-0.11416	-0.281136	-0.429468	-0.387011	-0.349103	0.810924	3.19144	2.3744
Ankrd26	1.15968	-1.33114	-0.862042	0.761371	0.928117	1.4007	1.47728	-0.696141	0.165301	0.965126	0.0724752	0.733116	1.16386	-1.00556	-0.73049	-0.0127916	-0.716734	-0.856629	-1.28436	-1.33114
Ankrd27	-0.63552	-1.10292	-1.31187	-0.839576	0.329203	0.230985	-0.7645	1.90416	1.37592	1.73078	2.00639	-0.52718	0.386286	-0.30179	-0.273475	-0.425958	-0.278448	-0.394145	-0.402673	-0.705674
Ankrd28	-0.685488	-0.799571	-0.771499	-0.717582	2.64652	0.197625	0.053838	0.182063	2.71153	0.326216	0.0475706	-0.914138	-0.670076	-0.625876	-0.0392838	-0.457715	-0.450943	0.281195	-0.0543974	-0.259993
Ankrd32	2.39278	-1.38044	-0.913565	-0.657554	0.102983	1.32024	1.9271	-0.342761	0.339701	0.603388	0.424865	-0.402686	0.0641208	-1.13781	0.0281992	-0.149533	0.0177831	-0.100618	-1.26943	-0.866759
Ankrd33b	-0.381443	-0.328447	-0.359539	-0.310218	4.04234	-0.0332123	0.0797369	-0.381443	-0.369761	-0.308696	-0.366781	-0.381443	0.238153	-0.353198	-0.381443	-0.381443	-0.381443	-0.374315	-0.128261	0.860856
Ankrd37	-0.39886	-0.451882	-0.530123	-0.0655578	-0.530123	0.342636	-0.140267	-0.317211	-0.443262	0.0363323	0.0241605	-0.142333	4.08429	0.0407499	0.334832	-0.0467427	-0.41956	-0.497575	-0.495822	-0.383678
Ankrd39	-1.07738	-1.41833	-1.32249	-0.779892	1.15715	0.00374793	0.658974	2.19708	0.793305	1.32712	0.36338	0.118426	-0.0504633	-0.488987	0.491216	0.758496	0.0255038	-0.365796	-0.820021	-1.57105
Ankrd40	-0.493198	-1.14309	-1.34418	0.913265	0.0173395	0.618182	1.78889	-1.19082	-0.630093	0.0513714	2.43988	0.67157	-0.507631	-0.185718	0.595434	0.614025	0.0907643	-0.824534	-0.427857	-1.05359
Ankrd44	-1.42164	-1.43268	-1.60838	-0.612105	-0.505749	-0.465503	-0.0568439	0.629973	-0.951914	-0.328041	0.516813	1.72662	1.13347	1.03832	1.09952	-0.393703	0.616219	-0.401471	-0.174177	1.59126
Ankrd46	-1.02681	-1.24831	-1.35624	-0.672683	2.01212	-0.820784	-0.92422	1.57132	0.873378	0.645343	-0.216091	-0.64848	-0.336547	-0.298686	0.453814	-0.146936	-0.839911	0.991689	0.601317	1.38671
Ankrd54	1.77639	-1.22323	-1.34709	-0.492057	0.0109787	0.762821	2.52722	-0.469017	0.141702	0.917828	0.0595161	0.0254204	-0.449738	-0.637929	0.931942	-0.255141	0.301548	-0.363228	-1.0364	-1.18154
Ankrd55	-0.247033	-0.309559	-0.309559	4.20332	-0.309559	-0.165942	-0.183861	-0.309559	-0.309559	-0.309559	0.00589226	-0.0316248	0.250754	-0.283495	-0.176906	-0.275508	-0.309559	-0.309559	-0.309559	-0.309559
Ankrd9	1.09771	-0.436876	3.87448	-0.516766	-0.216252	-0.0633157	0.0307142	0.326594	-0.421682	-0.421048	-0.407631	-0.494304	-0.492496	-0.626367	-0.375552	-0.527508	-0.550825	0.101834	0.174677	-0.0553864
Anks1	-0.989114	-1.14126	-1.14126	-0.806345	3.29034	0.583486	-0.566133	-0.132094	0.319915	1.47033	-0.377082	-0.00612184	-0.519263	0.204039	0.330848	-0.239631	0.283207	-0.398089	-0.332583	0.166812
Anks3	-0.560333	-1.05325	-0.678741	-0.482274	0.965079	0.816952	0.0540767	1.20503	-0.464682	-0.323281	2.95324	-0.41877	0.138579	-0.395331	1.44617	-0.429794	-0.72007	-0.768358	-0.305196	-0.979046
Ankzf1	-1.01452	-0.817926	0.234148	-1.28548	1.4154	-0.138413	-0.673178	2.37667	0.135147	0.451988	0.854332	-0.335185	-0.914653	0.31851	-0.773428	-0.0334718	-1.06034	-0.62243	1.83131	0.0515298
Anln	2.74188	-0.739308	-0.278536	-0.76303	-0.656284	-0.00655192	1.21797	-0.184363	-0.150558	-0.432153	-0.743664	-0.662499	-0.76303	-0.638974	0.87009	-0.165088	2.0572	0.560084	-0.569405	-0.693786
Ano10	-0.671732	-0.540542	-0.620225	-0.730823	-0.538151	-0.452527	-0.383124	-0.730823	0.0376479	0.056077	-0.464868	-0.164616	-0.275725	-0.332485	-0.273099	-0.235457	-0.157906	1.13791	2.76535	2.57512
Ano6	-1.29379	-1.03899	-1.01322	-0.423066	0.31155	1.3688	3.16745	-0.331173	-0.705975	0.829369	-0.0823202	-0.998746	0.474911	0.196486	0.245746	-0.0652233	0.224712	-0.130619	-0.555406	-0.180506
Anp32a	-0.978385	-1.56905	-1.58166	-0.960053	1.54052	1.36383	1.9366	1.86658	-0.0364122	-0.100515	-0.0304939	0.0575108	0.101758	-0.35657	-0.0339062	-0.136342	-0.0443314	-0.0922564	-0.643819	-0.303004
Anp32b	3.10045	-1.08728	0.00286613	-0.85211	-0.58357	0.763794	1.12558	-0.398755	0.298921	0.106951	-0.636392	-0.627186	-0.577296	-0.627383	0.285964	0.414413	0.991064	0.3616	-0.955313	-1.10632
Anp32e	0.483907	-0.686084	-0.137971	-0.383173	-0.0169097	1.04322	3.76546	-0.225145	-0.260204	-0.301978	-0.33764	-0.503876	-0.578072	-0.62106	0.163149	-0.165255	0.552538	-0.297058	-0.720459	-0.773385
Antxr2	-1.09854	-1.00313	-1.09854	-0.305159	0.435674	-0.945217	-0.606429	0.333177	-0.694412	-0.0907369	1.23357	0.410033	-0.0580063	-0.231104	0.272204	-0.523051	-0.549092	-0.0689804	1.78867	2.79906
Anxa1	-0.589773	-0.423756	-0.575939	-0.587674	-0.393483	-0.532696	-0.573964	0.462505	-0.221901	-0.510739	-0.542394	-0.514783	-0.369576	-0.211119	-0.400556	-0.258267	-0.299334	1.60711	3.05121	1.88513
Anxa11	-0.951104	-0.835843	-0.906991	-0.523409	0.174883	-0.386738	-0.478466	0.779956	-0.300256	-0.475585	-0.427725	-0.255917	-0.221117	-0.233491	-0.488233	-0.250694	-0.109699	0.875361	1.81485	3.20022
Anxa2	-0.834353	-0.736751	-0.774184	-0.786673	-0.856451	-0.825453	-0.817581	0.375022	-0.60317	-0.595016	-0.41504	-0.215998	-0.48055	1.38413	0.337373	1.31147	2.01281	-0.232821	0.508917	2.24432
Anxa3	-0.734382	-0.589388	-0.693668	-0.538811	-0.764214	-0.742818	-0.769352	0.0701483	2.3336	-0.587452	-0.690917	-0.744857	-0.531088	-0.0545571	-0.665057	0.965811	0.55359	1.12035	2.19232	0.870744
Anxa4	-0.868111	-0.84815	-0.976356	0.655547	0.18968	-0.843974	-0.776369	-0.0126556	-0.714589	1.97389	0.278189	-0.939724	0.137274	2.54603	0.835831	0.838564	0.456966	-0.859204	-0.541345	-0.53149
Anxa5	-0.780013	-0.725511	-0.818809	-0.0801629	-0.305169	-0.768193	-0.730576	-0.164018	-0.416326	-0.291382	-0.0883308	-0.490431	-0.627127	2.21603	1.40004	1.96554	1.9366	-0.553445	-0.23131	-0.447397
Anxa6	-1.03301	-1.07005	-1.06333	0.727801	1.0005	-0.503514	-0.649708	0.371697	-0.72193	-0.182895	0.168711	1.82259	0.340028	0.117063	2.2329	0.795305	0.717595	-1.0713	-0.981843	-1.01661
Anxa7	-0.329193	-1.5507	0.479206	1.03981	0.531508	-1.12696	-0.935225	-0.430528	-0.797926	-0.223791	0.691027	-1.2132	0.315548	1.09487	0.531091	1.27866	2.04364	-0.319073	0.422891	-1.50166
Aoah	-0.786481	-0.456316	-0.786481	-0.786481	-0.786481	-0.725091	-0.700264	-0.403225	0.386062	-0.682715	-0.786481	0.0841158	-0.786481	1.89559	-0.786481	1.05344	1.83502	1.61356	1.39368	0.211505
Ap1ar	0.211568	-1.07108	-0.86285	-0.110897	1.69029	1.95151	2.57114	-0.677371	-0.15448	0.276587	-0.282968	0.308279	-0.176625	-0.503907	-0.310408	-0.000663701	-0.138659	-0.5652	-1.08192	-1.07236
Ap1b1	3.06075	-1.12052	-0.641211	0.553455	0.686884	-0.223302	-0.720667	0.208906	-0.548935	0.582739	0.010023	0.628683	0.282926	-0.223895	1.3311	-0.211223	-0.582749	-0.841599	-0.951623	-1.27974
Ap1g1	-1.31795	-2.2388	-2.2315	0.230766	1.81962	0.37105	0.752232	0.427011	0.055027	0.376919	0.152248	0.151963	-0.745745	1.01654	0.0814883	0.0897909	1.08162	-0.142147	0.163314	-0.0934328
Ap1g2	-1.0428	-1.58869	-1.44182	-0.8573	0.583177	0.450568	0.648888	-0.416104	-0.0670907	0.355435	-0.023772	2.00293	1.20924	0.527331	1.03649	0.861809	0.791507	-1.14005	-1.05724	-0.832525
Ap1m1	-0.911608	-1.69381	-1.7631	0.307088	2.03341	0.792726	2.06017	0.5622	-0.420186	-0.214133	-0.4887	-0.1884	0.944032	-0.543625	0.133217	-0.395816	0.587947	0.164982	-0.677959	-0.288448
Ap1s1	-0.531918	-1.50394	-1.31821	-0.084979	1.02799	1.38631	-0.0789667	-0.211566	1.54781	1.26657	0.266546	-0.820413	-0.976683	-0.320157	-0.134115	1.40179	1.18308	0.0957499	-0.897979	-1.29692
Ap1s2	-0.821758	-0.953422	-1.11045	-0.980385	-0.288515	-0.329046	0.324222	-0.911346	-0.229573	-0.805747	-0.326328	-0.802172	0.140769	1.3283	-0.260773	1.51304	2.04845	-0.0401865	0.48898	2.01593
Ap1s3	-0.854498	-0.79188	-0.89923	0.210649	0.221375	0.582043	2.45479	-0.436865	-0.764212	0.21418	1.04511	-0.315718	0.661733	-0.653634	2.3619	-0.532718	-0.400977	-0.675473	-0.688467	-0.738108
Ap2a1	2.62118	-1.26866	-0.675496	-1.06833	2.15389	-0.0335426	0.58191	-0.646146	0.202573	0.42319	0.196312	-0.337005	-0.44313	-0.195873	-0.128511	0.265856	0.752296	-0.322658	-1.00113	-1.07672
Ap2a2	2.54165	-1.37624	0.4461	0.526408	-0.30437	-0.875129	-1.10445	-0.744768	-0.614583	-0.174872	-0.0408907	-0.947047	-0.824745	1.44829	0.460408	0.613675	1.16568	0.763941	0.000791835	-0.959844
Ap2b1	-0.266225	-2.12182	-1.76739	1.50262	-0.464951	0.0174602	1.21269	0.463769	-0.534043	0.320743	1.26483	0.763074	0.90944	-0.00109594	0.927131	-0.0684973	0.579335	-1.02874	-0.73449	-0.97383
Ap2m1	1.73346	-2.07752	-0.789381	0.588741	1.53362	0.273146	0.965524	0.744843	0.267871	-0.0930052	-0.370799	-0.930973	-0.819804	-0.330334	0.397307	0.705189	0.949035	-0.177394	-1.14103	-1.42849
Ap2s1	-0.210097	-1.92081	-1.77376	-0.737194	1.04533	0.613356	1.62861	0.249058	0.605943	-0.26348	-0.414262	-0.715481	-0.919549	0.563539	-0.0379282	0.997775	1.47824	0.969215	-0.18085	-0.977659
Ap3b1	-0.803815	-1.82403	-1.9324	-0.111562	0.156945	0.347086	1.09531	0.866318	-0.0702316	0.470059	0.8675	-0.490049	-0.19175	1.01512	1.19943	1.0217	1.25436	-1.21105	-0.815244	-0.843706
Ap3d1	0.190363	-1.65509	-1.25502	1.87808	1.21486	-0.503791	0.760847	-0.21547	-0.544227	-0.503774	1.37154	-0.180271	-0.0926223	0.281393	1.72451	0.366172	0.179266	-1.08422	-1.09421	-0.838336
Ap3m1	-0.946373	-1.699	-1.55123	1.16779	1.41203	-0.0822841	1.54359	0.225144	0.543456	-0.522695	-0.150056	-1.48772	0.171466	0.61099	0.527071	0.782691	1.32035	-0.539635	-0.623281	-0.702308
Ap3s1	-0.453511	-0.701796	-0.71253	-0.355227	-0.377481	-0.505293	-0.549585	2.62176	2.67551	-0.173722	-0.601515	-0.608522	-0.767542	-0.401935	-0.517905	0.349499	0.0278702	0.971737	0.245616	-0.165426
Ap3s2	-0.923089	-1.32159	-0.765099	-0.209757	2.11195	1.33047	0.657854	-0.752675	0.504097	1.36511	1.2966	0.118244	0.309252	-0.169918	0.267833	-0.215605	0.00287345	-0.91072	-1.23958	-1.45626
Ap4b1	1.16976	-1.52934	3.46385	-0.812502	-0.543815	-0.43828	-0.0868111	0.339871	0.249689	-0.547371	0.0281372	-0.235537	0.895736	-0.428293	0.0148825	-0.437968	-0.169375	-0.556983	-0.0929661	-0.282686
Ap4s1	-0.70214	-1.64798	-0.178946	3.48896	1.0523	0.694157	-0.0969402	-0.0654656	-0.218287	0.360133	-0.551205	-0.208273	-0.323289	0.0222825	-0.2117	0.111413	0.258802	-0.858797	-0.641815	-0.2832
Apaf1	-0.971742	-1.49676	-1.58925	-1.27028	0.0642591	-0.128476	1.31872	0.192221	-0.242673	-0.290651	-0.120741	-0.854612	0.0367564	1.78676	0.44541	0.912215	2.04323	0.635438	-0.0376168	-0.432206
Apba1	-0.62243	-0.568014	-0.67796	0.0713277	-0.67796	-0.67796	-0.356113	-0.67796	-0.206107	-0.245469	1.40537	-0.547374	-0.474928	1.03527	2.15392	0.56949	2.5147	-0.66188	-0.67796	-0.67796
Apbb1	-0.345785	-0.360832	-0.360832	-0.360832	4.02455	0.0176981	1.08415	-0.360832	-0.360832	-0.260071	-0.310329	-0.285161	-0.181557	-0.239852	-0.240131	-0.217949	-0.158901	-0.360832	-0.360832	-0.360832
Apbb1ip	-1.0361	-1.43082	-1.55651	-1.3486	-0.830813	-0.444875	0.274113	0.218675	-0.319086	-0.207218	0.576434	1.13532	-0.170414	2.07739	1.14344	0.331116	0.687234	-0.35054	-0.302016	1.55326
Apc	-0.741863	-1.05342	-1.11794	0.122292	0.470143	0.0652461	0.205513	-0.0934186	-0.614482	0.625297	3.46393	-0.170116	0.655864	0.32556	0.727979	-0.189769	-0.407524	-0.710499	-0.716537	-0.846263
Apeh	3.6314	-0.676328	1.24678	0.314107	0.340424	-0.045658	0.243532	-0.628953	-0.20597	-0.313242	-0.12486	0.286392	-0.0538929	-0.555846	-0.720596	-0.256793	-0.0387636	-0.770046	-0.799916	-0.871766
Apex1	-0.24553	-0.869425	-0.875099	-0.655468	-0.377136	2.35684	-0.0703661	-0.481427	1.49294	2.30484	-0.082017	-0.095541	0.400898	-0.454895	0.543263	0.36613	-0.626946	-0.862248	-0.884359	-0.884455
Apex2	2.92034	-1.22128	-0.341888	-1.22128	1.54481	-0.108133	1.24857	-0.559523	-0.283756	0.875663	-0.311417	0.184193	-0.236666	-0.739455	0.128498	0.271371	-0.250841	-0.301316	-0.804609	-0.793269
Aph1a	-1.03705	-1.63872	-1.50507	-0.533439	1.23554	-0.462064	-0.384645	-0.518963	0.119326	0.35576	1.32943	0.129676	-0.352885	1.44937	1.2821	1.20041	1.36854	-0.537543	-0.677395	-0.822373
Aph1b	-0.663493	-0.705628	-0.705628	-0.705628	-0.0159933	-0.607735	-0.520808	-0.705628	-0.47329	-0.568354	0.0176835	-0.605951	-0.342915	0.903032	0.219675	0.21547	0.0408522	0.0949762	1.92469	3.20467
Aph1c	-0.708255	-0.624228	-0.770991	-0.770991	-0.770991	-0.745599	-0.635231	-0.695243	-0.551337	0.0808524	0.703908	-0.770991	-0.770991	1.72663	2.18887	0.514045	1.77889	-0.651163	0.438032	1.03478
Api5	1.31077	-1.9053	-1.84499	-0.271353	0.137782	0.967262	1.82912	0.0931258	0.51161	0.0444879	-0.223165	-0.464149	-0.645481	0.512993	0.95788	0.95607	0.618238	-0.547642	-0.834999	-1.20226
Apip	2.62338	-1.37688	-0.453359	-0.821039	1.27755	0.730494	1.26411	-0.244837	0.421095	0.293681	-0.0806058	-0.721255	-0.976774	-0.399618	0.321062	0.218568	0.652744	-0.315346	-1.09005	-1.32292
Apitd1	0.179305	-0.727284	-0.713545	-0.720128	-0.451289	2.86256	2.28443	-0.42655	0.503096	0.124345	-0.682009	-0.711147	-0.327001	-0.702553	-0.0202703	0.586874	-0.00463179	0.487835	-0.748606	-0.793427
Aplf	3.41827	-0.200709	1.99019	-0.737376	-0.224493	-0.288891	-0.302833	-0.231642	-0.14608	-0.16564	-0.555688	-0.57239	0.506424	-0.572852	-0.000601306	-0.254868	0.118837	-0.354545	-0.687742	-0.737376
Aplp2	3.13912	-0.789799	0.639959	-0.339488	-0.0664812	-0.426003	0.270872	-0.190053	-0.569179	-0.324022	-0.715595	0.0267911	-0.643964	1.7862	-0.208581	0.380724	0.729764	-0.858057	-0.900109	-0.942096
Apoa1bp	-1.28889	-1.61115	-1.87746	0.868533	1.90015	0.318644	0.627764	0.084503	0.884779	0.656511	0.720316	-0.627544	-0.178209	-0.16665	0.68275	0.665809	0.773899	-0.245511	-0.776706	-1.41154
Apobec1	-0.669132	-0.717043	-0.762672	-0.239418	1.76382	0.890007	2.61111	-0.694372	-0.567749	-0.605944	-0.399908	-0.550984	-0.316184	1.97174	-0.527756	-0.199857	0.222758	-0.624413	-0.543613	-0.0403951
Apobec3	-0.216524	-0.970159	-0.62711	-0.034811	2.43706	0.514434	1.89278	-0.158128	-0.748171	-0.332673	1.28314	0.188594	1.00796	-0.774246	0.441282	-0.578607	-0.193608	-1.00001	-1.06922	-1.06198
Apobr	-0.861147	-0.660958	-0.861147	-0.861147	-0.861147	-0.742109	-0.820036	0.489003	-0.713851	-0.54723	-0.65026	0.0655382	-0.430773	1.09294	0.350633	0.349016	0.654809	0.455429	1.90543	2.64701
Apoc1	-0.321661	-0.0913884	-0.409551	-0.409551	-0.409551	-0.39079	-0.227469	-0.183193	-0.146216	-0.240733	-0.286688	-0.258837	0.253551	4.18024	-0.409551	0.116394	-0.0394084	-0.224552	-0.352881	-0.148167
Apoc2	-0.304835	-0.287002	-0.331788	-0.353881	-0.353881	-0.301552	-0.329335	-0.198611	-0.296164	-0.330723	-0.298557	-0.353881	-0.285741	4.14732	-0.325036	0.170188	0.553119	-0.202234	-0.166051	-0.151354
Apoe	-0.372393	-0.153384	-0.398263	-0.0805905	-0.433986	-0.433045	-0.434952	0.559895	-0.427421	0.616849	-0.295042	-0.397861	0.58127	3.96916	-0.395018	-0.372624	-0.306373	-0.363652	-0.415587	-0.446985
Apol10a	1.77365	0.434346	3.69039	-0.346964	-0.346964	-0.346964	-0.346964	-0.346964	-0.346964	-0.346964	-0.346964	-0.346964	-0.346964	-0.346964	-0.346964	-0.346964	-0.346964	-0.346964	-0.346964	-0.346964
Apol11b	0.860351	1.91991	3.5003	-0.371412	-0.380632	-0.375458	-0.371279	-0.354749	-0.377706	-0.350999	-0.372566	-0.36083	-0.362724	-0.368492	-0.357693	-0.371306	-0.374215	-0.377687	-0.372183	-0.380632
Apold1	0.52557	-0.300551	0.00218067	-0.244669	4.13898	-0.0406774	0.0698318	-0.391552	-0.33658	-0.241601	-0.305882	-0.391552	-0.222165	-0.391552	-0.391552	-0.391552	-0.119551	-0.184022	-0.391552	-0.391552
Apoo	1.79817	-1.16313	-0.610616	0.506662	0.151924	1.41034	2.58142	-0.381201	-0.0454478	0.392637	-0.296608	0.1695	-0.908541	-0.733273	0.27279	0.0236532	-0.232435	-0.514962	-1.17604	-1.24484
Apool	0.0189865	-0.960017	-1.49259	-0.900037	1.48169	1.45202	1.31129	-0.202472	0.223516	0.912524	0.780283	-0.0902919	1.14952	0.0227722	-0.109382	0.912297	-0.815133	-0.987786	-1.30135	-1.40584
App	-0.790841	-0.682516	-0.69436	-0.605028	-0.745296	-0.750739	-0.745111	-0.802073	0.825346	-0.596871	-0.587458	-0.734839	-0.687855	1.41884	-0.0867159	1.57677	2.48869	0.752777	0.595424	0.851858
Appbp2	-0.949587	-1.79352	-1.70758	1.20814	0.917716	1.09873	0.0259011	-0.678839	-0.119535	1.80524	-0.408784	-0.836285	-0.361779	0.646552	1.20679	0.324067	0.670344	-0.487812	-0.951187	0.391433
Appl1	-1.53653	-1.5444	-1.70996	-1.05754	1.88847	0.577707	1.04414	1.50194	-0.375088	0.713027	0.420407	0.561655	0.448434	-0.196952	0.70719	-0.0201164	-0.18693	0.0349452	-0.288338	-0.982063
Aprt	-0.804271	-1.03502	-1.08097	-0.679396	-0.742217	-0.561577	-1.04194	0.420144	1.31308	-0.14851	-0.759092	-0.430084	-0.54989	1.71461	-0.705907	1.24485	0.802363	2.10943	0.779999	0.154395
Aptx	-0.969208	-1.74011	-2.00537	0.14914	1.65299	-0.115003	0.68476	0.593438	0.0450844	0.954235	1.84552	0.529532	-0.179876	0.0323301	1.15148	-0.312562	-0.494999	-0.707233	-0.572314	-0.541827
Aqp1	3.42781	-0.303639	2.32149	-0.338859	-0.33104	-0.338492	-0.333221	-0.332435	-0.327909	-0.172513	-0.331215	-0.327611	-0.338859	-0.328709	-0.30458	-0.330702	-0.326519	-0.330334	-0.325162	-0.327504
Aqp9	0.311733	-0.189823	2.04432	-0.494327	-0.494327	-0.468743	-0.494327	3.39259	-0.494327	-0.355697	-0.465134	0.0448624	-0.235648	-0.479157	-0.494327	-0.464998	-0.454403	-0.473637	-0.327821	0.593191
Aqr	-0.360485	-1.73092	-1.47779	0.0574168	0.15437	0.0262281	0.587153	-0.491095	0.0157727	1.26234	1.01718	1.42731	1.11039	0.312339	1.59227	0.0623172	0.00525963	-0.78685	-1.5476	-1.23561
Araf	-0.706299	-1.01123	-1.13529	3.46432	0.597489	-0.417269	-0.0737403	0.430736	0.145766	0.176987	0.981897	-0.0226364	-0.341253	-0.394529	0.454197	0.0126367	0.155933	-0.476751	-0.810573	-1.03039
Arap1	-1.23456	-0.881089	-0.86964	-0.490408	0.248262	-0.708575	-0.715379	-1.16402	-0.496403	0.187659	0.62805	-0.672615	0.926574	2.21595	-0.0682307	0.204345	0.758137	-0.799917	0.827213	2.10465
Arap2	-0.832288	-0.748269	-0.908703	0.382218	1.15233	0.628249	1.25023	-0.908703	-0.292394	-0.104408	0.15047	3.07032	0.807416	-0.811447	0.0880219	-0.412218	-0.818614	-0.624019	-0.523181	-0.545003
Arap3	-0.617716	-0.592458	-0.719708	-0.33673	-0.501632	-0.652796	-0.624289	2.69545	0.0158463	-0.293178	-0.607466	-0.234523	-0.241032	-0.29288	-0.624436	-0.454453	-0.571536	0.981418	1.73483	1.93729
Arcn1	-0.232646	-1.94203	-0.966994	2.16872	1.01531	0.622761	0.628972	0.182466	0.0550618	0.0130361	1.01786	-0.612767	1.10381	-0.105983	0.193977	0.429433	0.199023	-1.12331	-1.22819	-1.41851
Arf1	-1.1687	-2.31954	-2.02251	1.02278	0.650821	0.40575	1.05449	0.55821	0.894078	-0.037638	0.64571	-0.866695	-0.512925	0.296519	0.461235	1.2251	0.769392	-0.0850559	-0.511383	-0.459634
Arf2	0.864343	-1.3259	-1.05293	-0.110381	0.20822	-0.221735	1.51676	-0.0352229	-0.316072	0.145204	-0.78512	-1.03138	0.0100122	1.11844	2.43694	0.763596	0.549918	-0.304033	-1.04665	-1.38401
Arf3	-1.77151	-1.58519	-1.80605	-0.870189	-0.200245	-0.40762	0.100702	-0.0636091	-0.118399	0.620906	2.01154	-0.0281104	0.484507	0.556673	1.78991	0.192548	0.898172	-0.123256	0.1122	0.207023
Arf4	-0.765778	-1.20305	-1.11108	3.28415	1.0952	0.078146	0.5384	0.345219	-0.320839	0.103524	0.553317	-0.261838	-0.387298	0.223474	0.439288	-0.0311051	0.118642	-0.903584	-0.96098	-0.833799
Arf5	2.69692	0.408164	2.88009	-0.794311	-0.329582	-0.562863	-0.487999	-0.266011	-0.400129	-0.495221	-0.156292	-0.428692	-0.63306	0.157144	-0.000619363	0.0202254	-0.0131545	-0.442983	-0.596964	-0.554662
Arf6	-0.620491	-1.69614	-1.512	2.0418	0.174518	1.21943	1.8515	-0.361036	-0.182598	-0.1034	-0.276356	0.237701	1.27602	-0.176239	0.496797	-0.186731	0.116884	-0.331096	-1.10342	-0.865137
Arfgap1	-0.842506	-1.90615	-1.12382	3.14876	0.276943	0.543809	0.528363	-0.553928	0.404907	0.372293	-0.359223	0.343895	-0.298227	-0.404948	0.669074	0.31903	0.324745	-0.675471	-0.778852	0.0113118
Arfgap2	-0.332232	-1.74576	-0.811283	2.06629	1.73162	0.548789	1.59013	-0.606139	0.0536707	0.315138	0.406145	0.0398825	0.0215174	-0.447371	0.448776	0.134713	0.0336306	-0.939085	-1.27155	-1.23689
Arfgap3	0.687064	-0.528338	-0.201762	3.91344	-0.224043	-0.454579	-0.390648	0.567207	-0.0421407	-0.0407981	0.4951	-0.603048	-0.26036	-0.225829	-0.536379	-0.114691	-0.264017	-0.662961	-0.531745	-0.581468
Arfgef1	-0.794694	-1.34618	-1.65955	-0.224232	-0.12449	-0.656564	-0.493013	-0.723147	0.0799117	0.127441	0.219127	0.0805325	0.219035	0.214729	-0.0403105	-0.406517	0.0901671	2.12214	2.70494	0.610675
Arfgef2	-0.616569	-1.65098	-1.65098	-0.163551	-1.09462	0.86053	0.355552	0.544365	-0.507992	0.292048	2.68795	-0.106033	-0.316488	-0.227518	0.894744	-0.0272062	-0.713401	0.241326	1.29276	-0.0939291
Arfip1	-1.31598	-1.09687	-1.41846	-0.114937	1.61599	-0.0797047	0.399916	-0.358595	-0.982108	0.33673	-0.150698	0.25227	-0.0885655	1.59652	-0.0493365	0.831226	1.8403	-1.29186	-0.874173	0.948341
Arfip2	-0.410161	-1.15613	-1.31949	2.28562	1.44477	0.575257	0.0401416	-0.357974	1.04072	1.75343	-0.105169	-0.0990887	0.205887	-0.129755	-0.163544	0.0836442	-0.822924	-0.551973	-0.993768	-1.31949
Arfrp1	-0.759703	-1.78745	-1.81531	1.03924	2.09463	0.954025	0.882467	-0.750979	-0.114409	1.11389	0.283972	0.579677	0.239483	0.148811	0.431486	-0.219191	0.215307	-0.720205	-0.823081	-0.992665
Arg2	-0.299742	-0.192215	-0.264441	-0.299742	-0.299742	-0.264724	-0.265954	-0.299742	-0.263583	-0.299742	-0.187525	-0.252288	0.0288735	-0.155127	-0.277814	-0.243461	-0.299742	-0.249902	0.168467	4.21815
Arglu1	0.568125	-1.51121	-1.24465	-0.510799	0.953229	2.16425	1.07429	-0.549714	0.0200908	1.31554	1.13258	0.502051	-0.0476894	-0.378974	0.2415	0.0449179	-0.452114	-0.789504	-1.14467	-1.38724
Arhgap1	-1.70631	-1.83521	-1.05906	0.659067	2.06651	-0.743101	-1.13449	0.0603829	-0.410543	-0.0248692	0.488592	-0.116403	0.163633	0.49202	0.301547	1.18599	1.69084	-0.0646345	0.00277286	-0.0167255
Arhgap10	-0.925909	-0.885866	-1.00126	-0.766433	2.49687	0.675778	1.53139	-0.344308	0.215273	1.01705	-0.516676	1.56645	-0.756805	-0.351741	-0.55562	0.388171	-0.526457	0.284677	-0.543319	-1.00126
Arhgap11a	1.16448	-0.948871	-0.417533	-0.847682	-0.940367	0.711262	2.86182	0.0913822	-0.170554	-0.321187	-0.514422	-0.849431	-0.594637	-0.511622	0.725555	0.10443	1.60883	0.414785	-0.737378	-0.828857
Arhgap12	-0.461285	-0.964786	-0.751981	2.61746	-0.300631	0.147749	0.304158	-0.964786	-0.887987	-0.123978	1.15678	0.633875	1.9087	0.0898516	0.663868	-0.240489	-0.0292356	-0.917361	-0.91514	-0.964786
Arhgap15	-1.61554	-1.48724	-1.54933	-0.654402	2.15769	-0.20562	0.608448	1.45808	-0.447788	-0.337234	0.102133	1.08233	0.981132	0.690905	0.278784	-0.374513	0.211701	-0.794052	-0.453005	0.347527
Arhgap17	-0.851211	-0.884555	-0.902261	-0.628059	-0.638169	0.826147	0.605776	-0.262187	-0.549886	0.00539462	3.06333	-0.496045	0.716795	0.526002	1.34896	0.284575	0.305878	-0.832531	-0.758675	-0.87928
Arhgap18	-0.856108	-1.15118	-1.0974	-0.826012	2.46823	0.186794	0.765157	1.1646	-0.275253	1.14852	-0.188029	0.634007	-0.262332	-0.20401	1.61029	-0.389011	-0.527636	-1.01976	-0.96725	-0.213611
Arhgap19	0.476324	-0.480486	-0.236044	-0.890339	-0.779441	-0.197973	2.37368	-0.282547	-0.0859129	-0.651807	-0.78137	-0.795009	-0.640072	-0.551975	0.312435	-0.216248	2.3084	1.78274	-0.142684	-0.521668
Arhgap21	2.28583	-1.26662	0.0967512	0.721339	0.62073	0.636494	2.10613	-0.355717	-0.0167385	0.57999	0.622665	-0.580706	-1.03031	-0.622848	-0.268694	-0.00377457	-0.545393	-0.445896	-1.26662	-1.26662
Arhgap23	3.8963	-0.564706	0.603858	0.452016	-0.653704	-0.506841	-0.299361	-0.653704	-0.34823	0.253171	-0.588772	-0.610577	-0.653704	0.0608922	-0.327597	-0.147269	-0.116213	-0.313246	0.160431	0.35726
Arhgap24	-0.819708	-0.882	-0.882	0.148452	1.28136	1.03957	2.67852	-0.882	-0.825724	-0.764549	0.842345	-0.727115	1.23555	-0.0182719	-0.421014	-0.334777	0.162511	-0.882	-0.663323	0.714173
Arhgap25	-1.39703	-1.23723	-1.17196	-0.331375	2.61905	0.442236	0.378912	0.407052	-1.04204	0.0144399	0.51285	0.978188	1.16518	0.391051	0.407051	-0.90366	-0.943194	-0.795534	-0.0791616	0.585183
Arhgap26	-0.932226	-0.773633	-0.736558	-0.940684	-0.114384	0.213744	-0.0512531	-0.341242	-0.500427	-0.541446	-0.403202	0.638101	0.0767664	3.01719	1.17183	0.598026	1.62171	-0.726504	-0.605598	-0.670215
Arhgap27	-1.26997	-1.18015	-1.01903	-0.58894	0.664207	0.303914	0.00835182	-0.869547	-0.363095	0.184124	3.38146	0.077664	-0.0016952	-0.0579695	1.16666	0.257269	-0.470157	0.0926411	-0.117462	-0.198268
Arhgap29	-0.419068	-0.419068	-0.419068	-0.419068	-0.419068	-0.225266	-0.25349	-0.419068	-0.334257	1.06958	3.97403	-0.0915433	-0.0231492	0.115439	0.148665	-0.189326	-0.419068	-0.419068	-0.419068	-0.419068
Arhgap30	-1.72955	-1.55556	-1.77852	-0.378643	0.258553	0.0717413	0.202557	-0.395666	-1.10389	-0.375079	1.41674	0.497525	0.952324	1.58309	1.02187	0.129696	0.808448	-0.661049	0.131617	0.903794
Arhgap31	-1.06153	-1.14181	-1.03901	-1.1807	0.841342	-0.603144	-0.56969	-0.627323	-0.132227	0.278568	-0.405035	0.363433	-0.549748	1.46111	1.46042	1.8473	1.73976	-0.661645	-0.493631	0.473567
Arhgap32	-0.483083	-0.483083	-0.483083	-0.483083	-0.483083	-0.241755	-0.0968091	-0.483083	-0.295753	2.3482	3.16061	-0.27896	-0.483083	-0.483083	0.885153	-0.278609	-0.0872399	-0.39258	-0.374508	-0.483083
Arhgap4	-1.51162	-1.22623	-1.07696	-1.09665	0.470575	-0.0715677	-0.824883	2.17774	-0.628882	-0.440952	-0.313314	0.904598	1.16536	-0.148973	-0.14174	-0.411325	-0.275675	0.931308	1.31837	1.20082
Arhgap5	-0.370927	-0.525199	-0.611407	-0.436901	0.136337	-0.525467	-0.525458	-0.540268	-0.359596	0.619262	3.00764	0.714432	-0.446872	-0.437518	2.38817	-0.173049	-0.336737	-0.582308	-0.594492	-0.399647
Arhgap6	-0.409897	-0.548619	-0.403524	0.372496	0.157626	-0.504443	-0.548619	2.47929	-0.493413	2.71359	1.37124	-0.548619	-0.407308	-0.263655	-0.426839	-0.461365	-0.467042	-0.537638	-0.524652	-0.548619
Arhgap9	-1.33338	-1.10549	-1.26407	-0.897256	-0.925957	-1.02697	-1.103	0.657943	-0.472243	-0.322951	-0.000749361	1.53138	-0.237674	1.32843	0.958449	0.388283	1.462	0.348631	0.703942	1.31069
Arhgdia	-1.21123	-1.66765	-1.68222	0.0394954	-0.0464411	0.685677	0.858005	0.0646227	-0.204305	0.184725	1.47967	-0.0309753	0.346589	0.419725	1.50184	1.05254	1.27435	-0.886851	-1.07308	-1.10449
Arhgdib	-1.33686	-1.18228	-1.23951	-0.898379	-0.160423	-0.565205	-0.562574	0.192304	0.865956	-0.597438	-0.394844	-0.24842	-0.05621	0.281832	-0.401833	0.271251	0.409556	2.25311	2.00767	1.36229
Arhgef1	-1.5254	-1.66563	-1.77942	-0.517703	0.538243	0.106879	0.610291	1.13807	-0.738692	-0.334517	-0.196804	1.96841	1.24302	0.545803	0.504038	-0.0983591	1.09756	0.125486	-0.705734	-0.31554
Arhgef10	-0.432946	-0.432946	-0.432946	-0.00619902	0.136402	-0.274923	-0.432946	-0.432946	-0.372195	0.978707	3.88875	-0.21689	-0.432946	-0.195234	0.766017	-0.374983	-0.432946	-0.432946	-0.432946	-0.432946
Arhgef10l	-0.485019	-0.426781	-0.334877	-0.496089	-0.496089	-0.476407	-0.496089	-0.496089	-0.471694	-0.368445	0.739227	-0.496089	-0.496089	2.54008	-0.25715	1.14242	2.72544	-0.425349	-0.428817	-0.496089
Arhgef12	2.17965	0.133005	3.37635	0.0459502	-0.325433	-0.422432	-0.503634	-0.503634	-0.489558	-0.0405894	-0.281709	-0.434928	0.373391	-0.421933	-0.503634	-0.472857	-0.482062	-0.405041	-0.414388	-0.406512
Arhgef18	-1.27583	-1.21014	-1.06921	-1.32227	-0.291044	0.329026	0.534651	-0.178525	-0.627181	0.715225	-0.590039	2.40712	1.83062	0.920994	0.273608	-0.0172149	0.808222	-0.408059	-0.513865	-0.316086
Arhgef2	-1.68025	-1.52577	-1.83042	-0.942275	1.1241	-0.250527	0.174151	1.71886	0.467799	1.88947	-0.316519	0.241606	0.669251	0.112321	0.606723	-0.00286983	0.36131	-0.194653	-0.0273238	-0.594989
Arhgef3	-1.18332	-1.00254	-1.24634	-0.279616	1.51053	0.0642653	-0.27664	0.992023	-0.972554	-0.566065	-0.696368	1.92487	1.64472	1.38056	-0.483013	-0.425568	-0.280956	-0.807523	0.0721865	0.631351
Arhgef37	-0.243277	-0.386748	-0.386748	-0.386748	-0.386748	-0.386748	-0.386748	-0.208535	-0.386748	-0.310041	-0.26854	-0.386748	-0.093199	3.93979	-0.267693	0.968527	0.737207	-0.386748	-0.386748	-0.386748
Arhgef6	-1.22962	-1.06282	-1.1571	-0.871426	-0.53288	-0.85411	-0.722031	0.786957	0.232801	0.303204	3.12988	0.175729	0.152113	0.776911	1.18289	0.0362589	-0.22244	0.0910006	0.00350459	-0.218832
Arhgef7	-0.578594	-1.50362	-1.64755	0.359086	2.83044	0.374148	0.85626	-0.185184	-0.293603	0.081408	0.7752	-0.169479	-0.482085	0.392703	1.23385	0.27537	0.0738965	-0.751138	-0.916727	-0.72438
Arid1a	-0.857002	-1.90961	-1.87012	-0.0205819	0.154047	0.956306	1.70818	-0.554915	-0.58099	1.03311	0.842323	0.291251	1.34158	0.203283	0.620651	-0.0482009	0.894867	-0.465305	-0.864982	-0.873895
Arid1b	-0.991443	-1.09662	-1.20101	-0.0958483	1.29359	0.737941	3.03127	-0.578007	-0.481498	1.26139	0.302573	-0.300404	0.133272	0.0115077	0.192102	-0.361008	0.15149	-0.627517	-0.516345	-0.865439
Arid2	0.35553	-1.89301	-1.42867	-1.14554	0.660623	1.70036	2.28772	-0.0541911	-0.241696	0.931186	0.0187168	-0.258587	0.298554	-0.26062	-0.403893	-0.239109	0.411794	0.380123	0.169028	-1.28832
Arid3a	-1.35801	-1.40506	-1.24119	0.338413	-1.22564	-0.0494106	0.57849	-0.174375	-0.232846	-0.632151	1.95847	-1.42108	0.516027	0.794174	-0.375749	0.257263	0.366395	0.609782	1.1225	1.574
Arid3b	-1.05299	-0.898062	-1.10441	1.41836	-1.10441	-0.772732	0.157528	0.590656	-0.950226	-0.399026	2.16752	0.599762	1.98073	-0.451949	0.678988	-0.590127	-0.728327	0.19854	0.0968849	0.163283
Arid4a	0.745563	-2.10615	-0.471066	-0.367658	-0.34221	0.125585	1.85248	-0.367345	-1.22113	0.0768946	0.839696	-0.055278	0.501002	1.20897	1.66457	-0.174677	0.258853	-1.34408	-1.12598	0.30196
Arid4b	-0.271198	-1.448	0.458955	0.307185	2.65742	0.42602	0.54492	-0.310622	-1.13233	0.202341	1.20394	0.836488	1.20107	-0.563698	-0.0572215	-0.769372	-0.938477	-1.2096	-0.754583	-0.383234
Arid5a	-1.22279	-1.27883	-1.16518	-0.51093	2.32608	1.13772	2.03882	-0.431583	-0.626215	0.0258511	0.717211	0.964884	0.131016	-0.0528312	-0.145438	-0.301528	0.106074	-0.658716	-0.867503	-0.186102
Arid5b	-1.53001	-1.45738	-1.52643	0.638995	0.824384	-0.461756	-0.738324	1.9263	-0.606246	-0.314554	-0.284574	1.23517	1.53479	1.07268	-0.630016	0.568594	0.242773	-0.387317	0.205287	-0.312367
Arih1	0.534321	-2.23553	-2.07672	-0.263912	1.18957	1.31061	1.25809	-0.722293	-0.271633	1.01237	0.328657	0.119353	0.0225441	0.147252	-0.437703	-0.0771105	-0.182006	-0.842966	-0.183694	1.3708
Arih2	2.11114	-2.483	0.220428	-0.285944	1.40606	-0.759612	0.239186	0.530585	-0.650115	1.1714	-0.335236	0.266655	-1.23836	0.545848	0.117977	0.476432	0.304877	-0.570997	-0.930794	-0.13653
Arl1	-0.793475	-1.67603	-1.67603	1.04442	0.200159	0.968525	2.125	0.417159	0.726212	-0.26656	0.817933	-0.0661655	-1.15678	0.523633	0.00191954	0.677528	0.68704	-0.892524	-0.811187	-0.850761
Arl11	-1.1823	-1.00813	-1.21908	-0.93365	1.23085	-0.934646	-1.09506	0.166158	0.909249	-0.160446	-0.304817	-0.998337	-0.884991	1.88511	0.907352	0.830663	1.50198	0.350484	0.458513	0.481096
Arl13b	-0.677049	-1.25023	-1.25023	-0.948895	1.97499	0.264812	2.37878	-0.427058	0.0407727	0.684552	0.231582	0.643106	-0.436026	0.475213	0.569429	0.516584	0.004293	-0.732422	-0.811964	-1.25023
Arl16	-0.228452	-1.56067	-1.33989	-0.148297	2.01831	1.31321	1.71074	-0.437887	0.147668	0.148943	1.0304	-0.349193	1.18525	-0.385421	0.225791	-0.217525	-0.643934	-0.287424	-0.985806	-1.1958
Arl2	0.933569	-1.37205	-1.1942	0.2301	1.41029	0.321482	0.0626428	-0.266364	1.87762	1.97136	-0.263442	-0.462401	0.0319262	-0.723222	0.174203	0.219281	0.358053	-0.676336	-0.961566	-1.67094
Arl2bp	-0.416735	-1.54078	-0.988658	-0.433631	1.66543	0.88301	0.696006	-0.631069	-1.29878	0.476019	0.391864	1.04762	-0.413632	-0.696361	0.699258	-0.308986	-0.870337	-1.11834	1.00873	1.84937
Arl3	-0.316276	-1.39411	-1.31058	0.887459	2.65139	0.745874	0.750829	0.571483	-1.02124	0.969725	0.617545	-0.665415	0.0616072	-0.314477	0.266554	-0.642731	-0.747864	-1.31523	-0.264819	0.470275
Arl4a	1.06764	0.428985	3.89796	-0.380866	-0.144739	-0.244684	-0.189643	0.215346	-0.50234	-0.256489	-0.0228759	-0.192696	-0.256674	-0.451826	-0.29619	-0.42613	-0.444841	-0.576747	-0.605893	-0.617294
Arl4c	-0.701371	-0.693046	-0.655208	-0.59033	0.694086	-0.221438	0.0128278	0.813135	-0.672984	-0.277872	-0.426186	3.55329	-0.597746	0.584401	0.575039	-0.0995656	0.643941	-0.680402	-0.696066	-0.564509
Arl4d	-0.389988	-0.389988	-0.389988	0.699752	-0.389988	-0.389988	0.390559	-0.389988	-0.291436	-0.389988	-0.283213	4.06643	-0.173357	-0.264734	0.102844	-0.213311	-0.243411	-0.339548	-0.330673	-0.389988
Arl5a	-0.744426	-0.79691	-1.026	0.756905	1.70332	1.78282	2.59812	-0.247213	-0.596658	-0.0660721	0.342076	-0.25515	-0.417598	0.0394581	0.0722346	-0.421017	-0.0578036	-0.777353	-0.913138	-0.975592
Arl5c	-0.558936	-0.505582	-0.533908	-0.475917	2.99905	1.35397	2.20861	-0.55921	-0.551315	-0.499978	0.0931184	-0.276832	-0.198179	0.0612584	-0.360095	-0.297293	-0.200128	-0.561419	-0.568297	-0.568921
Arl6ip1	0.898349	-1.02698	-0.746922	-0.903785	0.478711	0.18616	3.03497	0.0629412	-0.469771	-0.269051	-0.521093	-0.343635	-0.600433	-0.497227	0.798421	-0.189675	1.77241	-0.148951	-0.829681	-0.684744
Arl6ip4	-0.0163428	-1.6427	-1.55776	0.508128	0.827926	1.84308	0.606065	-1.0672	0.880914	0.828383	0.886435	-0.610876	0.0421027	-0.244501	1.07948	0.652476	0.180488	-0.62296	-1.17958	-1.39355
Arl6ip5	-0.854535	-1.30704	-1.21748	0.0497643	0.605127	-0.610908	-0.650866	-0.123869	-0.211226	0.243307	1.13915	1.60178	-0.451483	1.44226	1.97787	0.887194	0.379759	-0.92449	-0.976528	-0.997791
Arl6ip6	3.11536	-1.35931	-1.4617	-0.950882	-0.42253	1.16824	0.59116	0.781668	0.0638985	0.331763	-0.373641	-0.664986	-0.495201	-0.0296599	-0.104724	0.675507	0.00989117	0.0969551	-0.560933	-0.410876
Arl8a	-1.36099	-1.59942	-1.34509	0.0733393	0.852115	-0.826558	-0.584326	0.660429	-1.01559	-0.0391139	0.205134	-0.599173	0.760973	1.69186	0.142654	0.422067	1.79444	-0.601379	-0.0212896	1.38991
Arl8b	-0.0964647	-1.71159	-1.77769	1.12494	-1.07413	0.138027	-0.509881	-0.511835	1.1346	0.8587	0.338246	-0.692893	0.415522	0.63394	1.51531	1.26784	0.773944	0.167071	-0.658344	-1.33532
Armc1	3.18742	-1.30346	-0.197286	-0.122982	0.414375	0.982142	1.07039	-0.583877	0.0125048	0.267433	-0.603899	-0.181566	-0.890164	-0.386871	0.58902	0.350887	0.114564	-0.649875	-1.09565	-0.973116
Armc10	-0.970873	-1.37304	-1.22397	-0.154001	1.36685	0.686743	0.355762	0.422628	0.144888	1.76579	0.152803	0.858826	0.993794	-0.210093	1.56825	-0.397618	-0.462766	-1.00207	-1.091	-1.4309
Armc3	-0.899082	-0.824385	-0.645068	-0.96365	1.43721	-0.514727	-0.723745	0.418887	-0.0553406	-0.520781	0.582593	-0.186275	0.543482	-0.0563355	-0.718152	-0.688772	-0.641306	0.207985	1.19491	3.05256
Armc5	-0.0677585	-0.913941	-1.33709	-0.859909	0.763104	0.816517	2.61526	0.966164	0.00777183	0.971	0.912974	-0.487372	-0.8481	-0.139624	0.778205	-0.00158833	-0.0672102	-0.90577	-1.07216	-1.13048
Armc7	-0.837361	-0.646185	-0.911967	-0.556701	-0.326875	-0.50144	-0.911967	0.414259	-0.517722	-0.198005	-0.609302	3.36684	0.225152	-0.206673	0.0421291	-0.390024	-0.0373493	0.122989	1.12945	1.35076
Armc8	-0.638225	-1.24011	-0.989932	0.167825	0.811615	0.06988	0.226675	1.78129	0.183721	-0.215502	-0.66203	-0.797248	-0.548612	-0.738074	-0.934136	-0.565332	-0.844414	1.34157	1.85058	1.74046
Armcx2	-0.798674	-0.904731	-0.904731	0.0891744	2.73614	-0.140112	-0.0256857	0.313697	-0.0973639	1.05436	1.25547	0.349921	1.3011	-0.863819	0.672963	-0.476395	-0.847122	-0.904731	-0.904731	-0.904731
Armcx3	-0.6874	-0.856453	-1.06553	2.91427	0.977867	-0.0316277	0.12251	0.166759	0.779465	0.855877	1.46167	-0.896439	-0.247318	-0.348784	0.192013	-0.118251	-0.612404	-0.821536	-0.960414	-0.824267
Armcx5	-0.579978	-1.36992	0.830658	-0.904049	0.609619	0.864474	2.88982	0.264523	-0.180596	-0.649329	0.552031	-0.772221	-0.193824	-0.00346139	0.659844	0.619369	0.29519	-0.505532	-0.866306	-1.56032
Armcx6	-0.137944	-0.635792	-0.635792	1.22178	-0.0802222	0.0990212	-0.635792	-0.635792	0.0211518	2.77088	2.44469	-0.0650062	-0.635792	-0.635792	-0.190917	0.0235798	-0.407106	-0.613565	-0.635792	-0.635792
Arnt	0.900421	-2.62091	0.0102703	0.111268	0.317953	0.0544872	1.78614	-1.24652	-0.806285	-1.15063	0.455743	0.323585	0.521807	1.05822	-0.626019	-0.143066	1.19017	-0.546915	-0.328091	0.738374
Arntl	-0.39415	-0.434811	-0.469133	-0.317628	2.41576	2.07663	2.44674	-0.395108	-0.390375	-0.30475	-0.429942	-0.393602	-0.396785	-0.403551	-0.404535	-0.404866	-0.427408	-0.451931	-0.45142	-0.469133
Arpc1a	0.814093	-2.35967	-0.474759	1.19503	0.614807	0.379599	0.764123	0.707583	-0.228453	0.228174	-0.0572363	-2.0091	-1.02112	0.877843	0.617969	0.358633	1.35473	-0.410942	-0.92477	-0.426534
Arpc1b	-1.43235	-1.31041	-1.39639	-0.864613	-0.724798	-0.632287	-0.775678	0.444459	0.45991	-0.295744	-0.029573	-0.303859	-0.387377	2.01013	0.617505	1.67787	1.36815	0.265802	0.315225	0.99404
Arpc2	-1.45958	-1.45809	-1.59155	-0.791072	-0.677556	-0.751006	-0.814007	0.547895	0.150457	-0.0695979	-0.144711	-0.168064	-0.243442	1.43589	0.706903	1.38922	1.74243	0.355856	0.679187	1.16083
Arpc3	-1.06568	-1.95932	-1.70974	-1.31471	0.771504	0.12707	-0.0831339	1.38073	0.063328	-0.65563	0.00787692	-0.777978	-0.276532	1.18166	0.266269	0.935656	1.1798	0.00959068	0.679454	1.23979
Arpc4	-1.48724	-1.94377	-1.85066	-1.29655	0.44893	0.0267579	0.241658	0.00693484	0.866869	-0.0688111	0.08084	-0.566636	-0.701777	1.2611	0.649641	1.15799	1.07221	0.470979	0.890439	0.741092
Arpc5	-1.09449	-1.41414	-1.39949	-1.0085	0.28122	-0.266702	-0.114224	1.07901	-0.58424	-0.607085	-0.233601	-0.662609	-0.0464079	0.969856	0.154798	0.370472	0.4428	-0.0265964	1.66622	2.49371
Arpc5l	-0.327993	-1.07113	-1.04166	-0.167036	1.79039	2.26522	1.98381	-0.665711	-0.444872	-0.187442	0.283877	-0.173334	0.92575	-0.48591	0.264435	-0.0701954	-0.287279	-0.625723	-0.980792	-0.984413
Arpp19	-0.879739	-2.19215	-2.40843	-0.263577	0.191388	1.15565	0.178913	-0.119449	0.786423	0.194138	0.75079	0.192041	0.27275	-0.591893	0.939465	0.855472	0.6451	1.35427	-0.637799	-0.423371
Arpp21	-0.293962	-0.29571	-0.29571	-0.268668	4.20106	0.148651	-0.274655	-0.29571	-0.29571	0.177739	-0.167117	-0.29571	-0.29571	-0.29571	0.00161561	-0.29571	-0.287234	-0.293118	-0.29571	-0.282917
Arrb1	2.19973	-0.00407639	3.42035	-0.445594	-0.60696	-0.595619	-0.572295	-0.439782	-0.333554	-0.0805354	-0.51876	-0.428147	-0.388047	0.00627738	-0.292724	-0.225416	-0.0465055	-0.318302	-0.212672	-0.117361
Arrb2	-0.765915	-0.662448	-0.788186	-0.72618	-0.68921	-0.660304	-0.76025	1.43026	-0.108039	-0.356727	-0.4592	-0.255075	-0.292161	-0.0636203	-0.29073	-0.318992	-0.284388	1.82493	2.47299	1.75325
Arrdc1	-1.35041	-1.67909	-1.86885	-1.0866	0.106473	-0.239597	0.157047	1.3678	-0.227997	0.777246	0.239404	0.392362	1.87665	0.717574	1.31669	0.367625	0.490463	-0.511224	-0.214017	-0.631543
Arrdc2	3.38196	-1.08386	0.892138	1.08763	0.466239	-0.276587	-0.588811	-0.763778	-0.377601	0.246171	0.242607	-0.281413	-0.838776	0.415601	0.304271	-0.169663	-0.511335	-0.798339	-0.81574	-0.53072
Arrdc3	1.02638	-0.878541	3.04119	-0.512416	-0.442118	-0.73309	0.267575	0.356629	-0.787905	-0.510163	-0.53505	-0.830449	-0.601955	1.64847	0.578586	-0.238145	-0.24474	-0.81724	-0.464871	0.677851
Arrdc4	-0.8364	-0.680486	-0.673575	-0.680527	-0.788223	-0.838787	-0.990103	-0.0900914	-0.556265	0.647382	0.650692	-0.352282	-0.855773	2.53598	1.95135	0.640515	0.285342	-0.606893	0.0135079	1.22464
Arsa	-0.888714	-1.11096	-1.11096	0.825243	-0.508101	-0.478828	-0.842883	2.71853	-0.145682	0.111852	0.706927	-0.126479	0.247871	0.339994	0.621881	1.22005	1.15089	-0.800704	-0.818961	-1.11096
Arsb	-0.81286	-0.900225	-0.994061	-0.672993	-0.909717	-0.647905	-0.754651	2.29069	1.86076	-0.105448	-0.143868	0.260181	-0.668788	-0.257795	1.54819	0.928034	0.841217	0.409086	-0.569468	-0.700384
Art4	1.01529	0.135829	3.77452	-0.400919	1.16743	-0.327552	-0.362508	-0.400919	-0.389054	-0.278434	-0.400919	-0.400919	-0.400919	-0.400919	-0.330365	-0.400919	-0.400919	-0.39596	-0.400919	-0.400919
Arvcf	-0.124095	-0.383983	-0.48769	-0.48769	1.76936	1.68761	3.19515	-0.281678	-0.467225	-0.163889	-0.316373	-0.48769	-0.311771	-0.45354	-0.419713	-0.442117	-0.48769	-0.407728	-0.441554	-0.48769
As3mt	-0.947224	-0.919994	-0.984265	1.37648	2.32139	0.502902	-0.557782	-0.387187	0.931379	0.911138	1.70541	-0.632543	0.525509	-0.47601	0.0406786	-0.140732	-0.561149	-0.896346	-0.919106	-0.892549
Asah1	-0.870153	-0.774856	-0.881573	-0.183118	-0.357855	-0.737523	-0.754251	-0.600985	-0.263134	-0.208635	1.9855	-0.638724	-0.516531	2.26704	1.39695	1.06938	1.30687	-0.53215	-0.464795	-0.241444
Asap1	2.16818	-1.13765	-0.383909	-1.20056	0.709196	-0.586172	-0.629612	-0.75747	0.38837	0.20523	-1.19033	-0.87956	-0.51317	2.29352	-0.100914	0.323622	1.22446	-0.0998934	-0.0812947	0.247947
Asb1	1.07018	2.29618	3.14947	-0.531146	-0.40801	-0.210148	-0.3004	-0.289407	-0.29195	-0.213636	-0.358785	-0.496772	-0.531146	-0.425961	-0.479611	-0.391983	-0.350229	-0.329898	-0.445733	-0.46102
Asb13	-0.93404	-0.903789	-1.04804	0.181175	0.339358	0.412117	0.401102	-0.630599	-0.591857	1.00137	2.45693	1.40997	-0.773954	1.27816	0.745821	0.0821324	-0.449461	-1.00329	-0.925071	-1.04804
Asb2	-0.3919	-0.3919	-0.3919	0.708682	3.96617	-0.0868692	-0.184797	-0.3919	-0.3919	-0.3919	-0.251954	0.877286	-0.3919	-0.10248	-0.262288	-0.373603	-0.3919	-0.3919	-0.371141	-0.3919
Asb3	0.560271	-1.41573	-0.30438	0.792066	2.41682	0.713125	1.50172	1.55265	-0.659347	-0.42395	-0.343549	0.451032	0.0337367	-0.704114	-0.0728817	-0.524251	-0.744095	-0.910528	-0.88819	-1.0304
Asb6	2.72192	-1.31344	2.0395	-0.281189	1.48284	-0.418461	0.356752	-0.193933	-0.301038	-0.496258	-0.0412079	-0.071322	0.303995	-0.438375	-0.613172	-0.662725	-0.0835859	-0.521178	-1.11362	-0.355494
Asb7	-0.904028	-0.646286	-0.941594	-0.297962	-0.353314	-0.959198	-0.154528	-0.34803	-0.228746	-0.214094	-0.269773	0.0252056	0.340662	-0.575799	0.379437	-0.650209	-0.0357193	0.686682	1.98469	3.1626
Asb8	-0.211395	-2.02568	-1.90937	1.00879	2.15468	0.574427	1.24626	-0.0117655	0.109639	-0.30757	0.329306	0.777969	-0.843562	0.187595	0.0918577	0.72887	-0.363129	-0.693892	-0.963333	0.120302
Ascc1	0.242357	-1.35387	-0.913093	-0.518755	2.47464	-0.448206	-0.402379	0.994926	-0.0162394	0.799569	0.842045	0.126292	-0.488715	0.313475	1.74937	-0.0751675	0.000257957	-0.889143	-1.20548	-1.23188
Ascc2	1.04143	-0.634431	-0.0753213	-0.414596	2.63805	1.49155	0.829619	-0.606105	-0.0484198	0.735988	-0.946299	0.00374897	-1.36651	-0.292297	0.651816	-0.10218	0.178744	-0.859777	-1.21645	-1.00856
Ascc3	-0.0447298	-1.53566	-0.553846	3.39201	0.192349	-0.195993	-0.175733	0.271531	-0.56993	-0.0951031	0.973437	0.150986	0.718116	0.526035	0.225909	-0.353928	-0.361335	-1.0351	-0.80534	-0.723684
Asf1a	1.55106	-0.854882	-0.438144	-0.422807	2.3623	1.48466	1.7749	-0.21908	0.432904	0.235451	-0.348354	-0.55021	-0.675095	-0.803526	-0.539473	-0.253774	-0.446171	-0.223269	-1.00266	-1.06383
Asf1b	1.60945	-0.783384	-0.591153	-0.674909	-0.656413	1.34342	2.67088	-0.251495	-0.125915	-0.446201	-0.785429	-0.66208	-0.723444	-0.777027	0.238188	0.229216	1.03754	0.888662	-0.76701	-0.772898
Ash1l	-0.158332	-1.88741	-1.39138	-0.314213	0.412149	0.262617	1.44494	-0.00669842	-0.409244	0.724172	1.23737	0.491034	2.38053	0.0729328	-0.127869	0.095157	0.0431677	-0.694475	-0.943596	-1.23084
Ash2l	0.214545	-1.6027	-1.51635	1.02833	1.7728	0.654882	0.0220919	0.506227	1.23059	0.795761	0.140866	0.963215	-0.711873	-0.122215	0.161893	0.277619	0.072749	-0.778918	-1.42561	-1.6839
Asl	-1.02679	-1.099	-1.2722	2.01472	2.59174	-0.626705	-0.497592	0.878895	0.290111	0.0454813	-0.0121141	0.309217	-0.19085	0.0997095	-0.415699	0.40982	0.682742	-0.873377	-0.282077	-1.02604
Asna1	1.20878	-1.75067	-1.26982	0.590322	-0.443386	0.869633	1.13768	-0.478998	0.50188	-0.0428314	0.15345	-0.584077	0.712744	0.267186	0.045176	1.6756	0.985982	-0.489934	-1.39161	-1.69712
Asns	2.89877	-0.441834	0.967273	2.49387	-0.50226	-0.418945	-0.558829	-0.530157	-0.0310922	-0.317284	-0.550878	-0.481013	-0.582752	-0.582752	-0.494552	-0.519356	-0.523844	0.305169	0.0348783	-0.16441
Asnsd1	-0.296702	-1.91728	-1.85176	-1.00385	-0.8866	0.0827789	0.300607	-0.653347	1.25705	0.00460647	-0.675839	-0.628108	1.16132	0.221904	-0.0731784	0.775798	0.665898	1.73347	0.976015	0.807209
Asph	1.4939	-0.689734	-0.0814817	-0.465041	-0.513296	-0.619845	-0.635461	3.12701	-0.434861	0.741326	1.58124	-0.689734	-0.689734	0.129471	-0.14698	-0.275208	-0.295884	-0.572056	-0.649626	-0.313999
Aspm	1.63598	-0.660706	-0.211421	-0.635561	-0.513943	0.25459	3.06593	-0.382661	-0.404892	-0.376327	-0.620438	-0.620543	-0.594907	-0.651029	1.07664	-0.293641	1.2753	-0.050018	-0.631642	-0.660706
Asprv1	-0.120933	-0.110462	-0.164198	-0.113595	-0.375041	-0.311032	-0.375041	-0.375041	-0.31785	-0.34747	-0.32095	-0.299051	0.12697	-0.301186	-0.375041	-0.356512	-0.375041	-0.229606	0.610778	4.1303
Aspscr1	-0.0993946	-1.76651	-1.5583	1.03329	0.810258	0.0440487	1.42544	1.66473	-0.589788	-0.0648686	0.230604	-0.0777326	-0.486415	0.415544	0.574957	0.267867	1.41443	-0.785024	-1.04875	-1.40438
Asrgl1	-0.492738	-1.10728	-1.22705	1.0736	-0.0190813	0.965029	2.74227	-0.0754749	0.73286	0.935288	-0.612406	0.472398	-0.69452	-0.550269	0.272042	0.255779	0.360881	-0.578704	-1.16273	-1.28989
Ass1	-0.553556	-0.679221	-0.679221	-0.170855	-0.679221	-0.293188	-0.516611	-0.561021	-0.172889	0.569745	0.157014	-0.562442	-0.0817331	-0.138063	1.35414	2.60571	2.42861	-0.668765	-0.679221	-0.679221
Asxl1	-0.354402	-2.06944	-0.807405	-0.142086	-1.10689	0.338305	2.11815	0.0571344	-0.572579	0.698941	-0.281834	-0.326516	-0.316294	-0.149095	1.15156	-0.329617	1.21373	-0.928483	1.78752	0.0193044
Asxl2	0.7429	-1.61904	-1.07402	-0.58031	0.606006	1.06926	0.245139	-0.356219	-0.589711	0.425732	1.87877	1.88434	0.269832	-0.244323	1.02759	-0.155521	-0.331623	-0.742342	-0.964919	-1.49155
Atad1	-0.943913	-1.21395	-1.11877	1.07529	1.63672	0.949392	2.78407	0.482249	-0.0853363	-0.125429	0.194135	-0.271958	-0.438235	-0.334302	0.230044	-0.126971	-0.184545	-0.716294	-0.934843	-0.857354
Atad2	1.94319	-1.03788	-1.02239	-0.427748	-0.720883	1.89964	1.52067	-0.277435	0.215882	0.14532	-0.8707	-0.545467	-0.619623	-0.894939	0.595068	1.06488	0.388929	0.653724	-0.953105	-1.05713
Atad2b	1.21775	-1.83752	-0.100092	-1.01991	0.535577	-0.115608	0.441299	-0.276668	-0.754705	0.883346	0.933882	-1.05038	-0.147623	0.975061	1.41856	0.198615	1.75002	-0.979773	-1.01965	-1.05218
Atad3a	0.21286	-0.92037	-1.10017	-0.106663	0.0622168	1.44435	-0.0730019	-0.508711	1.87349	2.42014	-0.429946	-0.145237	0.378826	-0.578536	0.488996	0.755603	-0.664262	-1.00667	-1.00275	-1.10017
Atad5	2.64026	-0.870613	-0.69613	-0.702938	-0.548086	1.60228	1.57616	-0.111873	0.460358	0.595164	-0.716795	-0.717486	-0.837542	-0.811642	0.29379	0.230853	0.400932	0.0408229	-0.891496	-0.936013
Atat1	-0.200304	-0.399317	-0.344642	4.07206	0.870688	-0.178935	-0.19294	-0.169487	-0.316413	0.142785	-0.295231	-0.188809	-0.445224	-0.359797	-0.362515	-0.359036	-0.26593	-0.316605	-0.304533	-0.385817
Ate1	-0.829534	-1.82218	-1.74141	-1.26174	-0.580473	0.165546	1.42939	1.78088	-0.331958	0.737587	0.476517	-0.232072	1.41697	-0.276271	0.858742	-0.204439	0.801541	-0.086393	0.233265	-0.533982
Atf1	2.66897	-2.00618	-1.21042	-0.43934	-0.418626	0.619226	1.59102	0.57122	-0.0220814	-0.432402	-0.617367	-0.428245	-0.52469	-0.461289	0.116337	0.368908	0.597154	0.437615	-0.819559	0.409759
Atf2	1.45322	-1.84686	-0.144399	-0.452104	2.11872	0.624225	1.14925	0.628469	-0.0260042	0.313935	-0.354659	-0.866698	1.12206	-0.605132	-0.176073	-0.80962	0.709083	-0.742289	-1.29372	-0.801407
Atf3	-0.438924	-0.406798	-0.497877	-0.310842	-0.341484	-0.445958	-0.273321	-0.505325	-0.454256	-0.303297	-0.350365	-0.442576	-0.273427	3.74532	1.12805	0.627535	0.837162	-0.452722	-0.479526	-0.361374
Atf4	1.86653	-2.27881	-0.601065	0.771593	1.56028	0.0835938	0.434528	0.172488	-0.600728	-0.0236951	0.224221	-0.46799	1.25726	-0.326343	0.733024	-0.0670497	0.486189	-0.834213	-1.02348	-1.36633
Atf5	0.277951	-1.01627	-0.0510249	3.90387	0.0691572	0.439928	0.131622	-0.620534	0.586904	-0.250801	-0.286909	-0.601123	-0.439409	-0.361357	-0.257482	0.153279	-0.486359	-0.462589	-0.545795	-0.183054
Atf6	-0.291528	-0.929095	-0.759457	3.52588	-0.652569	-0.198758	0.0357053	-0.226167	-0.303002	0.0574464	1.00153	-0.60658	0.405987	0.397933	1.04058	-0.0883124	-0.255581	-0.764167	-0.818271	-0.571573
Atf6b	-0.991797	-1.25209	-1.31703	2.43059	-0.36747	-0.118329	0.0846214	-0.195454	0.386572	0.0742924	2.03485	-0.517759	-0.432616	0.215073	1.03269	0.579937	0.686285	-0.494749	-0.855987	-0.98163
Atf7ip	0.791874	-1.62294	0.0857279	-1.55605	2.16849	0.0861894	1.24741	0.263596	-1.12807	0.625398	0.758267	-0.0389378	0.925805	-0.0536768	0.729014	-0.956443	0.302839	-1.01066	-0.867326	-0.750512
Atg10	-1.13974	-1.29608	-1.29608	-0.315007	2.24036	-0.415954	0.139765	-0.764811	0.665324	0.33734	1.62689	-0.40821	0.431077	-0.0409321	1.55869	0.725356	0.229483	-0.443422	-0.941406	-0.892654
Atg12	0.0089378	0.400704	2.40188	-1.59106	0.548738	-0.181229	0.95934	1.34165	1.66513	-0.00147139	-0.264401	-0.3829	-0.454069	-0.12213	0.091793	-0.634315	-0.655805	-1.35789	-0.981214	-0.791687
Atg13	0.124559	-1.09279	-0.0706589	3.8279	0.311991	0.306763	0.111029	0.0683612	-0.261789	-0.457762	0.485846	-0.448854	-0.68332	0.0489038	0.073488	0.0149516	-0.0847759	-0.72707	-0.799745	-0.74703
Atg14	-0.00957655	-0.303542	3.50845	-0.560187	1.2045	-0.193741	-0.714388	-0.164925	-0.431632	0.309468	1.14659	0.0154037	-0.167258	-0.212083	-0.120723	-0.243059	-0.497553	-0.691485	-0.808422	-1.06584
Atg16l2	-1.23148	-1.17806	-1.40207	-0.279853	2.14316	0.845536	1.54052	-1.31317	-0.366885	-0.544076	-0.079679	0.153401	1.5649	-0.521811	-0.321996	-0.467806	-0.119382	0.841227	0.640533	0.096978
Atg2a	-0.620191	-1.73303	-0.502439	0.0733234	-0.9847	-0.57099	-0.341324	-0.724074	-0.798974	-0.0172615	0.311818	0.47456	-0.0869764	2.24986	0.598664	-0.156891	0.45158	-0.79207	0.82587	2.34325
Atg2b	0.977843	-1.30426	-0.841246	0.0816492	-0.802649	0.752614	-0.712411	-0.746194	1.02324	2.54085	0.473627	0.0402544	-0.00609623	0.264716	0.671546	0.81118	0.313855	-0.96362	-1.06023	-1.51467
Atg3	-1.42337	-1.57251	-1.67521	0.226368	0.0856968	-0.463095	-0.461861	-0.0943374	0.00462274	-0.573327	0.94774	-0.699965	-0.289824	0.522732	0.335386	0.71217	0.901824	0.479768	0.324836	2.71235
Atg4a	0.67673	1.86764	3.57297	-0.537473	-0.23985	-0.333914	-0.264389	-0.441989	-0.357066	-0.332421	-0.386398	-0.251702	-0.386502	-0.361238	-0.338584	-0.330232	-0.364117	-0.356455	-0.384536	-0.450473
Atg4b	4.0635	-0.828121	0.121031	-0.398902	0.0414458	0.182077	0.123876	0.0938601	0.106406	-0.106555	-0.25135	-0.290126	-0.391598	-0.412571	-0.167171	-0.109741	-0.242912	-0.338835	-0.324424	-0.869893
Atg4c	-0.690597	-0.856916	-0.969982	-0.50491	0.492322	-0.637702	-0.760218	-0.603855	-0.298377	0.384785	-0.291222	-0.620751	-0.512528	3.3162	0.174709	0.776551	1.20413	-0.532067	0.122569	0.807858
Atg4d	3.45842	-0.754708	1.91349	-0.373067	-0.650797	-0.10541	0.308094	-0.326659	-0.644452	-0.569619	-0.247027	-0.502947	-0.333079	0.177067	0.305301	-0.155236	-0.0943745	-0.35143	-0.400193	-0.653376
Atg5	-1.13806	-1.56791	-1.65342	2.9179	-0.146727	0.40597	0.847473	0.1114	0.0187318	-0.427679	1.31878	-0.348058	-0.435129	0.433626	0.520464	-0.131221	0.179939	-0.216436	-0.178235	-0.511405
Atg7	-1.39504	-1.46225	-1.59325	0.0963786	1.0864	-0.516006	-0.452772	0.122283	-0.390622	-0.261001	-0.575882	0.358181	0.392977	1.093	-0.136613	-0.0996422	0.472052	-0.423302	0.990767	2.69435
Atg9a	0.980014	-0.452675	3.6493	-0.212317	-0.97374	-0.790864	-0.521411	-0.127326	-0.471985	-0.314879	-0.55381	-0.253115	-0.631817	-0.0762995	-0.675375	-0.0536775	-0.113158	0.183045	0.786423	0.623666
Athl1	-1.2142	-1.46076	-1.47092	0.489075	0.528218	-0.00831373	0.429535	1.23733	-0.886615	0.75694	-0.0403734	-1.31883	-0.202881	1.0558	1.46565	0.752331	1.68523	-0.731603	-0.734674	-0.33093
Atic	-0.218112	-1.04071	-1.13076	-0.223117	-0.397598	1.09547	-0.638555	-0.273302	1.00554	1.86338	0.315739	-0.044164	-0.278415	-0.163673	1.13821	2.27573	-0.0357687	-0.985461	-1.11807	-1.14637
Atl2	0.842767	-1.09173	-0.767981	1.4494	0.733757	0.562327	3.16663	-0.588134	-0.396991	-0.105746	-0.156412	-0.564129	-0.0228816	-0.824813	-0.0373748	-0.566268	0.39171	-0.365604	-0.864161	-0.794356
Atl3	2.09606	-1.67073	-1.59038	0.460073	-0.528004	0.169796	0.38626	0.144762	-0.0593532	1.21736	1.32524	-0.0670022	0.922121	-0.139876	0.612851	0.537088	-0.664399	-0.849567	-1.18841	-1.11389
Atm	-0.742865	-1.13907	-0.997058	-0.0171923	-0.577736	0.984524	0.0244609	-0.230489	0.532095	1.77764	2.23918	1.41929	0.749384	-0.379157	-0.0915346	0.172176	-0.820039	-0.71212	-1.05243	-1.13907
Atmin	-0.764998	-0.987173	-1.69082	-0.889831	-0.640099	0.955049	0.798055	-0.543743	-0.570437	1.64936	0.945692	1.8726	0.327545	0.60128	0.806291	0.202558	0.635714	-0.778136	-0.793435	-1.13548
Atox1	-0.80044	-1.32934	-1.43766	-0.615166	-0.287135	-0.236078	-0.31625	0.445965	0.267209	-0.23557	0.0468088	-0.772712	-0.68488	2.62882	1.31895	1.5411	1.12816	-0.258594	-0.386494	-0.0166828
Atp10a	-0.796454	-0.968028	-0.631997	-0.968028	-0.409617	-0.230844	0.0363897	2.74658	0.17061	1.11021	-0.535684	0.336019	-0.968028	0.417868	-0.072102	0.647265	1.88425	0.000333648	-0.80071	-0.968028
Atp10d	-1.03806	-1.15491	-1.15491	-1.15491	-0.298335	0.342131	-0.158704	-0.209975	-0.227081	0.51127	0.0148101	2.52347	0.74964	2.15773	-0.0654439	0.465763	0.568979	-0.704849	-0.472417	-0.694187
Atp11a	-0.804529	-0.703458	-0.888297	-0.443013	-0.888297	-0.888297	-0.763102	-0.0200648	0.20407	-0.355505	-0.134266	-0.241167	-0.00984069	0.744357	-0.588358	-0.0261119	-0.0693583	0.799963	2.39186	2.68341
Atp11b	-0.907679	-1.81395	-1.89641	-0.406546	-0.452615	-0.696567	0.0940695	2.1967	0.530879	0.617678	0.105434	0.833929	-0.460108	-0.716252	-0.261165	0.131141	0.952137	0.110926	0.559179	1.47921
Atp11c	0.625781	-2.11809	-1.61624	-0.983915	-0.392814	-0.317191	2.6085	-0.92029	-0.641529	0.105987	0.460566	0.214549	0.252228	0.441175	0.872976	0.21273	-0.048235	0.81165	-0.0433844	0.475548
Atp13a1	-0.734863	-1.01056	-0.933479	3.7456	0.58179	-0.132487	0.328795	-0.642181	0.279798	0.256391	0.0984548	0.0950888	-0.0817307	-0.139942	-0.0907939	0.168069	0.223292	-0.520779	-0.700547	-0.789911
Atp13a2	-0.878985	-0.833621	-0.92312	-0.470369	0.172365	0.654007	0.372959	-0.360823	-0.680836	1.01926	2.94217	-0.803804	0.369115	0.556355	1.45187	0.0863078	-0.00948256	-0.918361	-0.883735	-0.861278
Atp13a3	-0.406356	-1.51423	-1.42482	-0.866023	2.55487	1.15572	1.00755	1.19317	-0.0726491	0.413149	0.392129	-0.661332	-0.722657	0.407467	0.110946	0.414167	0.104174	-0.213893	-0.854635	-1.01675
Atp1a1	0.0337402	-1.19534	-1.12643	-0.176058	-0.30169	-0.298636	-0.604089	-0.0847561	0.248123	0.635889	3.02791	0.233079	-0.177359	0.877721	0.991365	0.696505	0.458969	-0.895113	-1.15032	-1.19351
Atp1a3	-0.750122	-0.732473	-0.654972	-0.365987	-0.850229	-0.774371	-0.605069	0.207909	-0.628936	-0.122871	0.369976	-0.795119	-0.477527	2.85257	1.15124	0.616985	0.996815	-0.683447	-0.406385	1.65201
Atp1b1	-0.623353	-0.558968	-0.659549	-0.520925	2.09581	1.41246	1.3814	0.382609	-0.534763	-0.468836	2.43698	-0.33043	-0.327827	-0.654523	0.156585	-0.637701	-0.66132	-0.574244	-0.654448	-0.658957
Atp1b2	3.68162	-0.394083	-0.394083	-0.394083	-0.394083	-0.210452	-0.162516	0.431507	-0.342135	1.75082	-0.394083	-0.394083	-0.394083	-0.394083	-0.044677	-0.375171	-0.394083	-0.394083	-0.394083	-0.394083
Atp1b3	-0.496649	-1.0638	-1.05284	-0.569813	3.07906	1.23598	1.12347	-0.526491	-0.262539	-0.0421723	-0.128553	0.920685	-0.689237	0.678445	-0.0279795	0.00491037	0.0738143	-0.642303	-0.964016	-0.649969
Atp2a1	-0.229233	-0.218421	-0.199665	-0.238512	-0.238512	-0.191879	-0.238512	-0.238512	-0.230136	-0.193388	4.24794	-0.238512	-0.238512	-0.238512	-0.209752	-0.226671	-0.197723	-0.21766	-0.225315	-0.238512
Atp2a2	0.247595	-1.69751	-1.22357	2.46538	-1.0915	0.631669	0.207403	0.8314	0.669682	0.339933	0.542748	-0.0759228	-0.603	0.347185	0.363862	0.972939	-0.0014431	-0.592555	-0.595219	-1.73908
Atp2a3	-1.69661	-1.49787	-1.58248	-0.536611	2.16535	0.511341	0.555047	1.21825	0.212391	-0.123396	0.681715	-0.477932	1.2891	-0.48592	0.441818	-0.369248	0.0934642	0.6684	-0.123627	-0.94318
Atp2b1	-0.686608	-1.00364	-1.04453	-0.117508	-0.497509	0.00826647	0.0956246	-0.986335	-0.390767	-0.188705	-0.481219	0.487645	0.188924	3.12286	0.743382	0.910098	1.53756	-0.623732	-0.660788	-0.413013
Atp2b4	2.64476	-0.499443	2.13239	-0.671806	0.0300541	-0.605099	-0.714309	-0.539641	-0.340552	1.2449	0.594722	-0.300697	-0.658335	-0.525633	1.01701	-0.344782	-0.344866	-0.699948	-0.687842	-0.730879
Atp2c1	-0.803272	-0.935826	-1.19274	-0.354461	-1.05935	-0.468698	-0.243119	-0.376334	-0.293998	-0.222918	-0.212373	-0.594479	-0.362367	0.790555	-0.38272	0.244552	0.460429	1.34756	2.38983	2.26973
Atp5a1	0.317427	-1.45967	-1.181	0.0294771	1.06973	1.66689	1.97496	-0.220595	0.406354	0.633618	-0.299447	-0.471039	-0.226597	-0.190428	0.0769626	1.03328	0.652424	-0.925787	-1.36318	-1.52337
Atp5b	1.4204	-1.45676	-0.166875	0.167648	0.505648	1.42772	1.35197	-0.383708	1.0381	0.572436	-0.352025	-0.544106	-0.513058	-0.667892	0.140205	1.11212	0.614165	-0.978677	-1.58906	-1.69824
Atp5c1	-0.339159	-1.97072	-1.71795	-0.132728	0.89211	0.919267	0.299521	0.0926655	0.472903	0.547759	0.665161	-0.400352	-0.368664	1.12336	0.995662	1.39857	0.861003	-0.649743	-1.19676	-1.4919
Atp5d	0.499588	-2.16512	-1.64449	0.198755	0.7111	0.823374	0.170984	0.144854	0.378707	0.637035	0.368745	0.281601	0.175699	0.578398	0.641337	0.920279	1.34977	-0.903596	-1.43611	-1.73092
Atp5e	-0.525967	-2.38568	-2.29138	0.587916	0.199835	0.932753	-0.197118	-0.120814	0.889269	0.157958	0.972814	0.557954	0.194452	1.0133	0.499537	0.798316	0.790879	-0.49784	-0.380634	-1.19554
Atp5f1	1.12691	-2.33142	-0.985938	-0.33308	0.588315	1.04387	0.473006	0.671096	0.203387	0.15378	-0.490553	-0.878686	-0.990002	0.46421	0.901309	1.52988	1.2629	-0.686236	-1.11205	-0.610698
Atp5g1	0.653141	-1.42805	-1.31871	1.39814	-0.562645	0.878646	-0.431876	0.0199298	2.26877	0.903569	0.0708635	0.145151	-0.121753	-0.187823	0.111577	1.05864	0.079644	-0.821614	-1.2506	-1.46502
Atp5g2	-0.877291	-1.69578	-1.73455	-0.103509	0.389942	1.37021	0.894352	0.111353	0.986614	1.12802	0.50414	0.31492	0.26078	-0.325199	0.61896	0.822393	0.884377	-0.521874	-1.40739	-1.62048
Atp5g3	0.769763	-1.6778	-1.58059	0.278309	0.415938	2.12218	1.12317	-0.0133034	0.657426	0.744017	-0.0703707	-0.147549	-0.310565	-0.484681	0.337721	0.77309	0.649823	-0.760087	-1.29429	-1.5322
Atp5h	1.10214	-2.14525	-1.39228	-0.089366	-0.54667	0.757363	0.678959	-0.0349721	0.488526	-0.173649	0.263482	0.110036	-0.777938	0.863317	0.572378	1.28481	1.60305	-0.0369389	-0.784499	-1.74251
Atp5j	-0.158271	-2.30273	-2.06026	-0.0913482	0.124441	1.47528	1.11431	0.416917	1.15338	0.361816	-0.40604	-0.210915	-0.674275	-0.00670568	0.118405	1.26497	0.879716	0.407778	-0.435582	-0.970882
Atp5j2	0.948266	-2.34492	-1.58542	0.829192	0.407948	1.36325	0.819004	-0.0433677	0.667357	0.0712458	0.0286561	-0.0284408	-0.533144	0.0653171	0.157927	1.17352	1.07333	-0.601529	-1.21186	-1.25634
Atp5k	0.231771	-2.20161	-2.02148	0.230295	0.134001	1.01997	0.437328	-0.300084	1.21677	0.157378	0.189447	-0.17585	-0.337657	0.297935	0.0862653	1.59562	1.39851	0.0584722	-0.62236	-1.39473
Atp5l	-0.194585	-1.20984	-1.0689	-1.42612	-0.0206032	0.191138	-0.0774011	-0.296709	1.10204	0.061753	0.39769	-0.579141	-0.666755	2.07845	0.76196	1.83594	1.31671	-1.22191	-0.654328	-0.32939
Atp5o	0.951305	-1.75183	-1.24666	0.200394	0.154873	1.41344	1.3729	-0.524657	0.903748	0.380288	-0.330534	-0.276166	-0.35411	-0.142575	0.160195	1.263	1.2787	-0.48781	-1.2961	-1.66839
Atp5sl	-0.972649	-1.25536	-1.17665	-0.486867	0.983117	0.676484	0.112466	1.10183	-0.330103	0.26889	1.91815	0.0965558	1.73013	0.426163	0.903015	-0.105813	-0.342916	-1.14174	-1.09815	-1.30655
Atp6ap1	0.830567	-1.59608	-0.644556	0.651017	-0.148323	0.382346	2.74749	-0.0985509	-0.84849	-0.742014	0.289892	-1.09716	-0.0296861	1.45742	0.522395	0.276075	0.317634	-1.14872	-0.800795	-0.320465
Atp6ap2	-0.664248	-1.19133	-1.04789	-0.21382	0.745829	-0.0825358	0.527705	1.36669	3.00608	-0.532694	0.409794	-0.952232	-0.801918	-0.306283	0.355772	0.534092	0.36164	0.246553	-0.870917	-0.890284
Atp6v0a1	0.573977	-0.382051	0.506525	3.48382	-0.793991	-0.638545	-0.733349	1.49871	-0.60962	-0.301777	-0.40828	-0.684379	-0.00498932	-0.290488	-0.263887	-0.570969	-0.440572	-0.510877	0.0475375	0.523204
Atp6v0b	-0.5612	-1.67142	-0.734904	-0.241868	-0.912903	-0.993722	-1.10804	0.609653	0.449527	-0.553637	0.647085	-1.34378	-0.30425	1.74576	1.20022	1.32005	1.55182	0.023873	0.544322	0.333427
Atp6v0d1	0.0816728	-2.0484	0.0325699	0.328123	0.460612	-0.729574	-0.402439	0.85878	0.291722	-0.503383	-0.259835	-1.91978	-1.27008	0.957989	-0.0345751	1.81446	1.48226	0.030615	-0.127141	0.956402
Atp6v0e	-1.13649	-1.73156	-1.6076	-0.158892	-1.01714	-0.970165	-0.68348	0.209098	0.416237	-0.0460816	1.64909	-0.753096	0.0264362	1.12227	1.17494	1.05276	1.40791	0.235059	0.269783	0.540931
Atp6v1a	-1.11872	-1.3125	-1.55127	-0.315295	-0.147634	-0.339614	0.445578	-0.474448	0.442428	-0.42646	0.272241	-1.3353	-0.630566	0.924513	0.358371	1.68696	2.46685	0.444663	0.185473	0.424723
Atp6v1b2	-0.627213	-1.05153	-0.949656	-0.91326	-0.323306	-0.676072	-0.442337	0.791375	0.0117935	-0.525619	-0.576162	-0.770351	-0.538335	2.48825	-0.1737	1.77948	1.70503	-0.000920256	0.0217327	0.770797
Atp6v1c1	-1.02825	-1.78115	-1.80653	-0.0250166	1.75912	0.5313	1.32842	0.183551	0.715141	-0.446975	0.331987	-0.483063	-0.296547	0.374238	0.60452	0.841253	1.07298	0.314919	-0.690799	-1.49909
Atp6v1d	0.237481	-1.44381	-0.852548	-0.307313	1.19638	0.221087	0.523884	-0.42353	-0.365135	-0.17581	3.55881	-0.550644	-0.84582	-0.264238	-0.166013	-0.231453	-0.147691	-0.110811	0.246601	-0.0994161
Atp6v1e1	0.747466	1.12435	1.58911	-0.159738	-0.559142	-0.973002	-0.629771	-0.539353	0.297189	-1.25112	-0.5238	-1.47985	-0.963682	0.192355	-1.06894	0.305502	0.258291	0.187349	1.3247	2.12208
Atp6v1f	-1.93936	-1.81142	-1.74102	0.981101	1.1155	-0.214585	0.0808478	1.50244	-0.197487	0.00236651	1.07102	0.0901937	0.56188	1.21905	0.00552453	0.215328	0.196379	-1.00365	-0.46225	0.328144
Atp6v1g1	-0.580822	-1.54663	-1.28419	-0.269027	0.156616	-0.70017	0.302324	-0.111488	-0.819974	-0.503676	0.710661	-1.10349	-0.297158	0.437728	0.834288	0.423492	0.92316	-0.278902	0.775542	2.93171
Atp6v1h	-0.836517	-1.54723	-1.32805	2.77834	1.87755	0.626783	0.482485	-0.807237	0.0891509	0.404424	-0.0649267	-0.180102	-0.13386	0.0208513	0.0419385	0.144295	0.350787	-0.634971	-0.5378	-0.745911
Atp7a	-1.11772	-1.02487	-0.581145	-0.424395	-0.0429483	-1.07828	-0.356311	-1.1976	-1.14283	0.131165	1.58853	-0.0690712	0.995902	2.05268	0.145858	0.495262	1.97473	-0.475286	0.0599082	0.0664251
Atp8a1	2.07658	-1.06959	-0.323237	-0.506217	0.858275	-0.0752113	1.51506	-0.987455	-0.645714	1.43949	1.64644	-1.21062	-0.407212	0.00755865	-0.34226	-0.971741	-1.00673	0.405596	-0.105872	-0.297154
Atp8b4	-0.832276	-0.625203	-0.824865	-0.865083	-0.809113	-0.809992	-0.809256	2.15636	2.71781	-0.141262	-0.736231	0.0062406	-0.668428	0.182931	-0.0244334	0.759614	0.553694	-0.206657	0.346631	0.629518
Atp9b	-0.897695	-1.69759	-1.38176	1.87902	0.400707	-0.569581	-1.06025	-1.04199	0.184011	0.847184	0.928319	0.911943	1.20113	0.81159	0.966015	-0.153893	0.585569	-0.633302	-0.876203	-0.403224
Atpaf1	-0.664496	-1.28452	-0.987317	1.34512	-0.49058	1.62926	1.91568	-0.119221	1.17849	0.649629	0.74995	0.309776	-0.90423	-0.479992	0.8517	-0.364596	-0.827884	-0.402291	-0.819952	-1.28452
Atpaf2	0.563512	-1.35621	-1.18588	-0.389438	1.77726	1.29153	2.19963	0.123313	0.654074	0.753929	-0.0616644	-0.0347409	-0.699326	-0.757834	0.122782	0.15764	-0.296944	-0.284219	-1.21843	-1.35898
Atpbd4	-0.267904	-1.21397	-1.21397	1.83952	0.0854976	0.860247	0.681667	-0.547399	0.431813	1.90269	1.55807	0.398022	-0.0638677	-0.473407	-0.883805	0.401936	-0.331541	-0.837748	-1.11188	-1.21397
Atpif1	3.30426	-0.151148	2.29779	-0.544652	-0.303591	-0.218355	-0.235156	-0.29471	0.211531	0.185848	-0.490643	-0.623783	-0.496548	-0.464321	-0.309213	-0.103553	-0.157087	-0.379042	-0.590548	-0.637074
Atrip	-0.0513667	-1.5098	-1.5098	1.4804	0.335591	0.222379	0.120622	1.54666	0.15295	1.28456	0.292026	1.02442	-0.0423197	-0.556085	1.09749	-0.193834	0.218567	-0.974285	-1.42837	-1.5098
Atrn	-0.454406	-1.07448	-0.778628	-1.22576	-1.22576	-0.390517	-0.315957	-0.972264	1.56251	-0.574399	-0.62013	-0.170124	-0.370427	0.1831	0.286874	0.384975	0.654022	1.7244	1.95376	1.4232
Atrnl1	-0.793935	-0.676713	-0.817272	-0.817272	-0.0209211	-0.215663	-0.244263	-0.817272	-0.266485	-0.329029	0.196017	-0.732219	-0.239032	2.42213	0.0116161	0.827234	2.87657	-0.0204334	-0.400909	0.0578483
Atrx	-0.496699	-1.92175	-1.76221	0.00753166	1.08848	0.957605	2.18195	0.387095	-0.0376623	0.970147	0.651462	-0.0305816	0.341174	-0.402532	0.616217	-0.213977	0.392038	-0.513326	-1.10163	-1.11334
Atxn1	-0.700684	-0.633505	-0.335079	3.33099	-0.20703	-0.629124	-0.734964	0.412084	-0.137794	0.69144	-0.620907	1.12066	1.45009	-0.43184	-0.66118	-0.548813	-0.634848	-0.279415	-0.262901	-0.187171
Atxn10	-1.2274	-1.11274	-1.27842	-0.489209	0.744597	-0.142204	0.0760046	-0.55509	0.0782768	0.251562	-0.440559	-0.608743	-0.579177	-0.141523	-0.0926871	0.256513	0.285283	0.331802	1.46874	3.17497
Atxn2	2.38526	-1.44629	-0.456017	-1.18544	0.166799	0.472992	0.35588	-0.931046	0.0185927	0.519598	2.48912	-0.269198	-0.561648	0.393312	-0.0442076	0.103853	-0.30676	-0.468463	-0.256724	-0.979611
Atxn2l	-0.217607	-1.74099	-1.74331	-0.634171	-0.861341	0.284129	2.30225	-0.491703	-0.198323	1.44002	1.26573	0.567813	0.539979	0.0635474	0.838239	0.0183156	0.234933	-0.301211	-0.674028	-0.692273
Atxn3	0.42401	-1.54907	0.0858577	1.44313	0.879924	0.817508	-0.838624	-1.04652	-0.328617	0.464044	-0.2924	-0.44737	-0.541576	1.19836	1.70985	0.381954	1.18701	-1.28982	-1.3028	-0.954862
Atxn7	-0.838949	-1.36642	-1.30202	-1.14811	1.73568	-0.0463067	-0.128256	1.97786	-0.697915	0.00322283	1.69974	0.43758	0.417426	0.421583	0.862029	0.215959	0.0116879	-0.584089	-0.720801	-0.949903
Atxn7l1	0.755627	-0.453013	1.46665	-0.891794	2.00474	-0.992399	-1.10384	-1.21044	-0.685277	0.0865194	1.70978	-1.05874	-0.0852658	1.14009	-0.0704544	0.253071	0.361699	-1.17426	-0.327591	0.274886
Atxn7l3	-0.518941	-1.36775	-1.76547	-0.947883	-1.32461	0.513738	0.814051	-1.4261	-0.222337	1.29854	1.07802	0.835558	-0.00671113	0.54976	1.78134	0.527474	0.584607	0.124028	0.113073	-0.640393
Atxn7l3b	-0.648944	-2.05475	-1.67977	-0.904029	1.44311	0.781232	0.244884	-0.628354	-0.0806259	1.4969	1.76584	-0.0217096	-0.201971	0.254568	1.1028	0.251268	0.331465	-0.421694	-0.538896	-0.491327
AU019823	0.377301	-1.53061	-1.59063	0.652336	1.84716	0.851186	0.0845286	-0.389728	0.46522	2.11689	-0.0333655	-0.184801	-0.778158	0.384676	0.588349	-0.0951872	0.372557	-1.02884	-1.03177	-1.07712
AU022252	-0.224494	-1.24184	-0.849278	-0.162697	1.94264	0.90926	1.89594	-1.07293	0.520573	-0.334233	1.42134	1.16283	-0.544936	0.174714	-0.454719	-0.0939333	-0.187155	-0.557626	-1.06161	-1.24184
AU040320	-1.01551	-1.35958	-1.0921	1.43498	0.397461	-0.120536	-0.393205	-0.258459	-0.462074	0.685676	3.02586	-0.654506	1.00647	-0.0822975	0.134403	-0.647973	0.234027	-0.214753	0.169145	-0.787036
Auh	0.377069	1.17572	1.92393	-0.321143	-1.3538	-0.467707	1.14239	1.11443	-0.501569	-0.215593	1.01103	0.253427	-0.932825	0.624821	0.534642	0.0616841	-0.238078	-1.1683	-1.23129	-1.78885
Aup1	0.321238	-1.26285	-0.338471	3.48496	0.129378	-0.343646	-0.25287	-0.345484	-0.0825575	-0.145446	0.383514	-0.172984	-0.537655	1.36608	-0.280866	0.131446	0.39872	-0.554501	-0.9364	-0.961607
Aurka	2.56854	-0.656135	-0.506898	-0.541014	-0.675051	0.248086	2.50248	-0.299292	0.00446799	-0.430304	-0.655357	-0.647906	-0.658265	-0.627907	0.388002	-0.226984	1.2702	0.227148	-0.640218	-0.643597
Aurkaip1	0.729707	-2.89154	-1.99493	-0.308198	-0.0777801	0.928292	0.649951	0.500782	0.925292	-0.295018	-0.700643	-0.200296	-0.0156635	0.335189	0.302992	1.01367	1.32309	0.0320023	-0.134696	-0.122213
Aurkb	0.814654	-0.718861	-0.714257	-0.710206	-0.475866	0.598834	2.8789	-0.340047	0.049916	-0.360191	-0.65213	-0.664037	-0.606243	-0.619155	0.637843	0.0232847	2.14152	0.163017	-0.727985	-0.718985
Aven	0.264255	-1.04361	-1.18681	1.33724	0.631336	1.18969	-0.2344	-1.18681	-0.43538	1.25515	-0.413815	2.27421	0.213389	0.267598	0.36493	0.230843	-0.0913119	-1.06288	-1.18681	-1.18681
Avl9	-1.31045	-1.81725	-1.50432	-0.0740351	1.08608	-0.406441	0.706251	0.581141	-1.10032	-0.291308	1.23832	1.10989	1.76416	0.726648	0.488558	-0.723798	-0.861367	-0.224282	0.0976623	0.514849
Avpi1	-0.584094	-0.465982	-0.722078	1.44511	-0.430688	-0.663431	-0.722078	-0.722078	0.336431	1.14592	0.062234	0.470117	-0.521673	0.409882	3.20819	0.32316	-0.522252	-0.618771	-0.705844	-0.722078
AW011738	2.01526	0.229708	3.3543	0.817941	-0.166728	-0.516416	-0.516416	-0.305436	-0.469904	-0.461981	-0.516416	0.0290613	-0.516416	-0.254279	-0.279071	-0.431292	-0.516416	-0.516416	-0.462666	-0.516416
AW112010	-0.358477	-0.256617	-0.376282	-0.053266	0.227545	-0.230605	-0.275354	-0.181372	-0.28805	-0.111891	-0.308228	4.20065	-0.102702	-0.00870348	-0.258621	-0.288697	-0.250688	-0.359046	-0.355069	-0.364527
AW209491	-0.194577	-0.987726	-0.566168	3.44099	-0.704248	-0.449198	-0.948231	0.741251	0.643309	0.827281	-0.234623	-0.0531631	0.326013	-0.35793	-0.0651911	-0.569865	-0.390256	0.645315	0.0740832	-1.17707
AW555464	-0.249503	-0.330267	-0.330267	-0.330267	4.19721	-0.0115702	0.0164909	-0.330267	-0.319558	0.141585	0.0560185	-0.126841	-0.330267	-0.330267	-0.128625	-0.308962	-0.330267	-0.307722	-0.316381	-0.330267
Axin1	-0.241424	-1.80572	-1.80572	0.697029	-1.09306	0.795892	0.526754	-0.179253	-0.603074	1.05591	1.08738	1.0385	-0.779167	0.342677	0.761148	0.537374	1.68002	-0.278812	-1.03671	-0.699741
Axl	-0.159971	1.18012	-0.546106	1.59656	-0.546106	-0.52895	-0.546106	-0.480559	-0.499646	-0.514416	-0.299307	-0.401958	-0.370281	3.30752	0.927534	-0.352643	-0.345875	-0.457477	-0.416232	-0.546106
Azi2	1.46958	-2.29557	-0.474985	-0.49552	0.14115	-0.366891	0.47195	0.890905	-0.0103247	0.0259296	0.0531415	1.15801	-1.56282	1.09664	0.756784	0.563725	1.21601	-0.577995	-0.790609	-1.2691
Azin1	1.93534	1.02384	2.87898	0.390343	-0.74166	-0.0620026	1.12038	-0.463131	-0.328362	-0.461912	-0.623539	-0.974035	-0.788702	-0.77814	-0.220005	-0.319601	-0.182168	-0.430327	-0.561239	-0.414067
B230118H07Rik	-0.637568	-0.496872	-0.787682	-0.787682	0.0174861	-0.284395	-0.0846375	-0.170492	3.49851	1.09343	0.201791	-0.604106	-0.787682	-0.350625	0.00940362	-0.0713789	-0.0634301	1.34238	-0.351145	-0.6853
B230120H23Rik	1.33349	-1.00062	-0.149857	-1.16319	0.687014	0.40379	0.20405	-0.636948	1.36291	1.20435	-0.914048	-1.07398	-1.02026	-0.00187195	0.256966	2.08263	0.819041	-0.268079	-0.962199	-1.16319
B230206F22Rik	-0.23256	-0.750377	-0.80786	1.63863	1.72832	0.818641	1.02484	-0.661197	-0.673925	-0.360789	2.31136	-0.711917	0.681243	-0.636067	0.198146	-0.701329	-0.644036	-0.685592	-0.727681	-0.80786
B230208H11Rik	-0.535956	-0.38605	-0.437623	-0.320977	-0.472961	-0.288412	-0.515541	-0.470045	-0.00408413	-0.466932	-0.510997	-0.442063	-0.335523	-0.274427	-0.546092	-0.30829	-0.300542	1.87739	3.1988	1.54032
B230208H17Rik	-0.214449	-1.46676	-1.3036	1.35496	0.099608	0.436248	0.580333	-1.01068	1.10377	1.27354	0.575625	-0.304544	-0.817572	0.29713	1.35622	0.500012	1.04159	-0.661842	-1.27159	-1.56799
B230219D22Rik	-0.527325	-1.78806	-1.66533	-1.3905	-0.163803	0.773247	1.74642	0.468869	0.526458	1.55186	0.648477	-0.540262	0.211685	0.0173459	0.985885	0.401772	0.564977	0.167619	-0.892127	-1.0972
B230312A22Rik	0.15895	2.03955	3.54731	-0.536481	-0.382864	-0.504195	-0.50094	-0.430208	-0.453129	-0.383633	-0.225662	-0.40934	-0.258093	-0.0805671	-0.328429	-0.326779	-0.304252	-0.339686	-0.123485	-0.158069
B230378P21Rik	-0.422547	-0.272668	-0.422547	-0.422547	3.69324	-0.378104	-0.422547	-0.422547	-0.377443	0.287884	-0.422547	-0.422547	-0.422547	1.73048	0.104185	-0.176726	-0.0827078	-0.318227	-0.406993	-0.422547
B2m	-0.606928	-0.880616	-0.729306	3.87801	0.430027	-0.211203	-0.156204	-0.202895	-0.403837	-0.205974	0.672594	0.378954	-0.158933	0.317411	0.00585987	-0.177623	-0.245709	-0.565495	-0.609697	-0.528433
B330016D10Rik	-0.758546	-1.42676	-0.880093	0.576374	2.81129	0.826506	-0.825672	-0.45168	0.0472746	1.50947	1.18197	-0.232547	-0.259552	0.148199	0.245215	0.0990402	-0.315603	-0.761984	-0.587899	-0.944992
B3galnt1	-0.334546	-0.334546	-0.334546	1.00948	-0.334546	-0.334546	-0.334546	-0.334546	-0.334546	-0.334546	4.00264	-0.334546	-0.334546	-0.245637	0.440097	-0.228132	-0.334546	-0.294802	-0.334546	-0.334546
B3galnt2	1.9731	-1.44142	-1.39469	-0.313496	1.38535	1.07017	0.167314	0.0378289	0.583187	0.959861	0.116918	1.08356	-0.737274	0.113731	-0.538299	0.818673	-0.631968	-1.09186	-1.06702	-1.09366
B3galt4	-1.36364	-1.39031	-1.39031	2.29649	1.49671	-0.92187	0.0635148	0.50261	-0.484691	-0.166791	0.491233	0.488624	0.701875	0.970657	0.538333	-0.24439	0.243541	-0.0841278	-0.357141	-1.39031
B3galt6	-0.477155	-1.41089	-1.47722	-0.815557	0.71485	0.591548	1.32199	0.0947054	1.95854	0.539275	-0.556361	0.18157	-0.4277	-0.669229	0.948348	0.434245	-0.239542	1.52223	-0.756423	-1.47722
B3galtl	2.92015	-1.30944	-1.30944	-0.201891	-0.855586	-0.126691	0.321401	0.0548713	0.445659	0.972451	-0.27182	-0.0861779	0.150894	-0.164492	-0.113762	0.694439	1.46417	-0.796172	-0.878009	-0.910554
B3gat3	0.632715	-1.42502	-1.93093	1.32266	0.444738	-0.367496	-0.16504	1.66346	-0.4058	-0.0135921	1.85866	1.01033	-0.355953	0.0605516	0.177284	-0.0357762	-0.552131	0.0284164	-0.280952	-1.66613
B3gnt1	-0.919222	-1.168	-0.997185	1.097	1.3416	-0.273106	0.393613	-1.168	0.400134	0.0698273	0.8879	-0.206181	-0.927594	0.708831	1.45162	0.648177	1.75723	-0.990908	-0.937737	-1.168
B3gnt2	-0.639576	-0.681276	-0.696295	-0.194551	3.63171	0.95979	1.42935	-0.438858	-0.195195	-0.0266851	-0.0409587	-0.447715	-0.276111	-0.481462	-0.0882039	-0.390442	-0.390688	-0.275379	-0.249457	-0.507995
B3gnt5	-0.772639	-0.471758	-0.57437	-0.340281	0.959142	1.0823	0.68999	-0.388641	0.482887	0.627535	-0.722568	-0.0245533	3.39391	-0.741889	-0.439035	-0.323168	-0.597117	-0.538825	-0.710964	-0.589961
B3gnt8	-1.02237	-0.982673	-0.98536	-0.982351	0.901384	0.932628	2.35035	0.296058	-0.0063421	-0.537086	1.24467	-1.00507	-0.351437	0.866218	0.0258267	0.827512	1.02971	-0.728057	-0.993189	-0.88042
B3gnt9-ps	-0.333479	-0.342392	-0.342392	4.14297	0.0629482	-0.152333	-0.217525	-0.151343	-0.326228	-0.255094	0.602792	-0.342392	-0.214046	-0.342392	-0.106948	-0.330181	-0.342392	-0.324787	-0.342392	-0.342392
B430010I23Rik	-0.691089	-0.575405	-0.691089	-0.691089	-0.691089	-0.521873	-0.641439	-0.691089	0.339359	-0.662116	-0.565812	-0.691089	-0.194935	1.34352	-0.543248	0.153747	0.510289	1.06814	1.56922	2.86709
B430306N03Rik	-0.713411	-0.450278	-0.519911	-0.812571	-0.812571	-0.804666	-0.783457	-0.33832	-0.394	-0.598958	0.0776601	-0.519366	-0.309591	0.300439	-0.126345	0.16137	0.392537	1.2324	2.64282	2.37623
B4galnt1	-0.733591	-0.845176	-0.883636	-0.718479	-0.862816	-0.707137	-0.871741	0.606964	1.94898	-0.139189	0.705305	2.76059	0.747396	-0.100148	0.0925833	0.624046	0.0633521	-0.189955	-0.665815	-0.831529
B4galt1	-0.950637	-1.96029	-2.00832	0.649358	0.930332	0.296074	1.00996	0.178483	1.35712	0.62511	-0.359106	0.504022	-0.914699	-0.231978	-0.432092	0.698232	0.774091	0.757585	0.541848	-1.46509
B4galt3	-0.615474	-1.65086	-1.5105	0.0485312	1.12998	-1.02298	-0.606057	0.349474	0.0153664	0.43248	0.700477	-1.14107	0.460484	-0.280127	-0.259984	-0.377618	-0.534209	1.90046	1.61439	1.34723
B4galt4	-0.628622	-0.667625	-0.667625	-0.667625	0.0848245	-0.146393	-0.667625	-0.667625	1.82459	1.37543	0.0235877	-0.667625	-0.53685	-0.108809	2.98022	0.715335	0.0769778	-0.338115	-0.648802	-0.667625
B4galt5	-1.11448	-1.0005	-0.937479	-1.11448	-0.196597	-0.383842	-0.622755	0.247515	-0.82996	-0.155729	1.20561	0.626985	0.8621	2.4751	0.0253775	1.13668	1.49235	-0.551409	-0.395147	-0.769332
B4galt6	-0.418137	-0.361005	-0.427173	-0.427173	-0.328537	-0.376873	-0.427173	-0.427173	4.12195	-0.270904	-0.286012	-0.427173	-0.285555	0.226845	0.0169736	0.00877527	-0.0878029	0.389448	0.082249	-0.295549
B630005N14Rik	-1.01607	-1.19283	-1.19283	0.805525	0.965647	-0.690625	-0.807632	-1.004	-0.879877	-0.152961	2.34838	-0.0795236	0.960364	1.7265	0.566687	0.351484	0.450601	-0.622671	-0.234355	-0.3018
B9d2	-0.674775	-1.05321	-1.12644	-0.334481	3.03202	0.619826	1.21003	1.33424	0.0171626	0.704509	-0.0556973	-0.474003	-0.558848	-0.194958	-0.0499861	-0.231041	0.291742	-0.769963	-0.804798	-0.881329
Bace1	-0.723749	-0.74738	-0.628354	-0.865928	0.830226	-0.456927	-0.464528	3.2795	1.88754	0.564831	-0.547029	-0.432118	-0.336167	-0.468257	-0.0475498	-0.153602	-0.326009	-0.084017	-0.252905	-0.0275754
Bach1	-0.495319	-0.855402	-0.577201	-0.427265	0.55801	-0.703229	-0.674516	-0.334355	-0.519043	0.101364	-0.486921	-0.52673	-0.444544	3.53406	0.568707	0.311041	1.37782	-0.488927	-0.173403	0.255855
Bach2	-0.480757	-0.457728	-0.424323	-0.451291	0.810651	1.75612	3.50803	-0.458894	-0.491765	-0.340643	-0.25858	-0.180729	0.370965	-0.453914	-0.0964358	-0.441883	-0.453843	-0.479063	-0.473839	-0.502077
Bad	-1.06634	-1.84444	-1.61774	-0.306056	0.89781	-0.192363	0.108614	1.83748	0.625965	0.464943	0.720881	-1.02611	-0.772746	0.72055	0.804002	1.3706	0.812185	-0.258974	-0.362104	-0.916141
Bag1	2.16003	-1.8546	-0.447745	0.340891	-0.106503	0.236538	-0.379074	0.622403	1.02405	0.907413	-0.106369	-0.403495	-1.04303	0.247328	0.483425	1.07947	0.818948	-0.697353	-1.24814	-1.63419
Bag2	3.61067	-0.444649	1.23543	-0.650996	-0.650996	0.394743	-0.14714	-0.241082	0.60634	0.628342	0.051599	-0.490746	-0.0858173	-0.627369	-0.457444	-0.354273	-0.614524	-0.584665	-0.616983	-0.560436
Bag3	-0.428013	-0.0297164	-0.790433	2.2768	-0.790433	-0.760974	-0.790433	-0.000619827	-0.110208	-0.0855085	-0.519597	0.265349	-0.790433	2.65023	-0.131215	1.01718	0.933101	-0.754336	-0.630834	-0.529909
Bag4	-0.188616	-1.68136	-1.68716	-0.0466335	1.09357	0.463853	-0.892435	0.765372	1.04139	1.40586	0.183736	1.55754	-0.00483944	-0.228913	0.635783	-0.00228929	0.750981	-0.421828	-1.29628	-1.44773
Bag5	-0.81188	-1.34244	-1.34244	1.70554	1.81418	0.427177	0.338033	-0.60296	0.0898794	1.75076	0.935347	-0.00346151	0.12001	-0.275675	0.238761	0.321905	-0.0643028	-0.925214	-1.16809	-1.20513
Bag6	0.317315	-1.80569	-1.2877	0.107045	2.31856	0.502455	1.51482	0.323753	-0.0732946	0.376051	-0.480774	-0.24712	-0.328998	-0.473956	-0.095644	0.818228	1.30243	-0.569864	-1.03475	-1.18287
Baiap2	-1.10066	-0.891285	-1.12006	-0.726835	-0.70469	0.44359	3.09976	0.181918	-0.20091	0.790944	0.70358	0.0750155	0.321531	-0.358841	1.38839	-0.186869	0.212079	-0.264928	-0.928878	-0.732855
Bak1	-0.476981	-1.54923	-1.33185	-0.84088	1.97398	0.663139	0.529576	-0.748176	0.884658	0.0978421	-0.00376366	-0.445207	-0.885864	0.465174	1.32555	1.45103	0.921519	-0.076237	-0.757883	-1.1964
Bambi	-0.8977	-0.969434	-1.141	-1.141	0.0365115	0.160184	0.682965	-0.540459	1.92684	0.224928	-0.353623	-0.442772	-0.156537	0.277574	0.905468	1.66693	2.05328	-0.494017	-0.943283	-0.85486
Bambi-ps1	-0.680371	-0.678073	-0.718363	-0.718363	-0.392703	0.564908	0.632037	-0.718363	3.47964	-0.436908	-0.489173	0.829099	-0.556735	0.284028	-0.458325	-0.273362	-0.226863	1.21119	-0.218006	-0.435298
Banf1	0.047414	-1.18402	-1.14874	-0.687549	0.0441575	1.51244	2.85895	0.0321543	0.577396	0.273004	-0.532799	-0.187346	-0.280604	-0.612895	0.222303	0.491499	0.945116	0.0647114	-1.16944	-1.26576
Bank1	-0.318762	-0.262573	-0.276374	0.232955	-0.0438427	-0.203897	-0.277134	-0.323036	-0.289874	-0.251726	-0.255761	-0.239265	4.21432	-0.196517	-0.301685	-0.309163	-0.289392	-0.225074	-0.264364	-0.118831
Banp	0.231896	-1.29571	-1.07471	0.163838	0.882154	0.371459	3.36377	-0.585056	-0.587865	0.298589	0.354717	-0.297735	0.233435	-0.374459	0.827692	-0.475771	0.209805	-0.604688	-0.818957	-0.822408
Bap1	0.172734	-1.33675	-1.35381	-1.13178	1.41609	1.43215	2.6697	0.334909	0.472054	0.197688	-0.0126092	0.0907608	-0.178122	-0.529387	-0.161927	-0.0805258	0.377174	-0.500695	-0.900434	-0.977216
Bard1	1.98716	-0.792823	-0.792823	-0.792823	-0.632124	1.55865	2.1553	-0.513434	-0.198931	0.178003	-0.687696	-0.736226	-0.677687	-0.681954	0.950243	0.260143	1.10298	-0.128423	-0.764715	-0.792823
Basp1	-0.493295	-0.498354	-0.607054	1.78455	-0.607054	-0.607054	-0.530342	-0.607054	-0.522645	1.0897	1.38189	-0.310294	-0.607054	-0.322351	0.284524	-0.426382	-0.520008	-0.526731	-0.308569	2.95357
Batf	-1.23221	-1.26066	-1.33049	-0.95193	-0.662381	-1.12784	-1.16285	-0.0895035	0.512421	0.942898	1.01939	1.18428	0.669177	1.49874	1.15888	0.983785	0.93455	-0.591307	-0.564748	0.069799
Batf3	-0.290061	-0.349529	-0.253247	-0.207787	-0.349529	-0.349529	-0.349529	-0.349529	-0.328296	-0.0760338	-0.253234	-0.251914	-0.349529	1.0784	4.03375	-0.126132	-0.237583	-0.3319	-0.309252	-0.349529
Bax	-0.403421	-1.52563	-1.50889	-0.0739984	0.329934	0.823804	-0.698057	0.0772493	0.26099	0.316793	0.43633	0.809768	0.320983	1.43569	1.03601	1.41843	1.02845	-1.15526	-1.47696	-1.45221
Baz1a	0.369159	-1.7038	-1.63266	-0.838407	0.708314	1.27389	1.91822	-0.126993	1.09009	-0.238312	-0.653776	-0.553155	0.762557	-0.0956647	0.80718	0.149517	0.390579	0.479292	-0.371433	-1.73459
Baz1b	1.14925	-1.45049	-1.47515	0.146315	0.261358	1.74493	2.44381	-0.592718	-0.11028	0.478409	0.0222807	-0.558838	-0.442216	-0.339118	0.576523	0.301045	0.336345	-0.280781	-1.20102	-1.00966
Baz2a	-0.00975679	-1.57436	0.285016	0.741601	3.20349	-0.368729	0.542829	-0.41878	-0.911688	0.42222	1.05571	-0.0727392	0.396186	0.036548	0.183642	-0.773108	-0.409219	-1.03832	-0.534653	-0.75588
Baz2b	-0.42837	-1.59103	-0.985891	-1.42489	1.83528	0.365267	1.38341	0.314352	-0.896713	0.263298	0.645657	-1.39828	1.26438	-0.11252	0.888987	-0.871914	0.142731	-0.547421	0.143414	1.01026
Bbc3	0.428346	-1.12233	0.855279	0.838654	-0.824588	-0.906199	-1.24787	1.48629	-1.16731	0.734546	0.0300462	1.77865	-0.950845	1.32656	-0.208194	0.261311	0.871652	-1.2354	-0.846197	-0.102404
Bbip1	0.090202	-1.6959	-1.39024	-0.761645	0.593292	-0.123085	0.701434	-0.957531	-0.83789	-0.856235	0.207415	-0.911598	-0.155543	0.313066	0.290342	0.0537847	1.61285	0.223528	1.51594	2.08781
Bbs9	-0.674037	-0.674037	-0.674037	3.94619	0.379074	0.0399568	0.201598	-0.351603	-0.177905	-0.18157	-0.674037	0.404219	0.511548	-0.326382	-0.174741	-0.32512	-0.151181	-0.186802	-0.237095	-0.674037
Bbx	-1.11128	-1.13255	-1.23569	-0.0827474	2.79527	0.851508	0.478385	-0.0310425	-0.358112	0.703799	1.28568	0.394623	0.672483	0.0975696	0.440457	-0.633246	-0.396318	-0.796846	-1.05322	-0.888716
BC002163	-0.730254	-1.52023	-1.39597	0.857101	3.08218	0.78781	0.870174	0.419494	0.283088	0.160782	0.255683	-0.547023	-0.488539	-0.421638	-0.0700792	0.377643	0.0351373	-0.688451	-0.402908	-0.863996
BC003266	-1.12063	-1.76366	-2.02467	-1.10879	-0.758409	0.68113	0.00965819	0.270042	1.17649	0.221356	0.806411	1.61533	0.105574	0.671858	0.639092	1.25019	0.304299	0.270736	-0.373987	-0.872029
BC003331	-0.0965526	-0.774027	-0.760774	3.94339	-0.362165	-0.0688636	0.142036	-0.263676	0.14465	0.18001	0.318628	-0.498928	-0.36614	0.268218	0.0352152	-0.0386112	0.216915	-0.574271	-0.681205	-0.76385
BC003965	-0.0758692	-1.46072	-1.58745	0.602454	2.33428	1.01761	0.898174	0.116989	0.52709	0.784947	-0.189241	0.734777	0.43416	-0.445497	0.179148	0.296791	-0.637005	-0.912819	-1.18553	-1.43229
BC004004	-0.963504	-1.7215	-1.77253	2.31215	1.56486	-0.267403	0.471371	0.543672	0.387072	0.0217093	1.18827	-0.356333	0.104035	-0.28995	0.0164815	0.265687	0.515436	-0.417253	-0.844096	-0.75818
BC005537	0.779795	-2.00063	-0.264536	-0.138908	-0.0279763	0.0614	-0.735161	0.715974	-0.255711	1.06583	0.0977714	-0.457111	-0.20515	1.35615	0.993598	1.42703	1.3969	-1.1152	-1.13051	-1.56355
BC005561	-0.651861	-1.30181	-1.29508	0.1959	1.91532	1.03347	0.964473	0.346535	0.771065	1.65941	0.190445	0.62858	0.598453	-0.467005	0.0664968	-0.376588	-0.825629	-0.768578	-1.3051	-1.37851
BC005624	-0.739444	-1.76341	-1.45082	-0.551143	2.73135	0.456114	1.57523	-0.509611	0.103926	0.741436	0.323948	-0.264576	0.412009	0.43646	-0.0434648	-0.221373	0.380384	-1.01809	-0.203459	-0.395473
BC005764	-0.593369	-0.402154	-0.459054	-0.159739	-0.593369	-0.574719	-0.593369	-0.448746	2.97403	1.93394	-0.242189	-0.530931	-0.593369	-0.402159	-0.00499656	1.65747	0.362705	-0.177817	-0.558795	-0.593369
BC006779	-0.887515	-1.25187	-1.21291	1.90094	-0.288798	-0.628662	-0.682735	-0.891434	-0.773611	0.147646	2.13284	1.59618	0.682503	0.788863	-0.386704	-0.19026	-0.146422	-0.448045	0.75068	-0.210687
BC013529	0.106121	-1.646	-0.668657	1.55254	2.82793	-0.284944	-0.233428	0.58958	-0.691648	-0.194849	1.4571	-0.305038	-0.651441	0.0224375	0.281692	-0.16768	0.212849	-0.809035	-0.689012	-0.708523
BC016423	-0.914578	-1.31567	-1.19415	0.45167	1.15387	0.3793	0.468876	-0.903467	-0.0802412	0.868737	1.87746	1.66817	1.1988	-0.335023	0.385825	-0.254174	-0.281017	-0.994555	-1.17823	-1.0016
BC016579	-0.288237	-0.288237	-0.288237	-0.288237	0.296252	-0.288237	-0.288237	4.17103	-0.26505	0.369612	-0.288237	-0.288237	-0.288237	-0.288237	-0.288237	-0.248291	-0.288237	-0.288237	-0.288237	-0.288237
BC017612	-0.743891	-0.952307	-1.01713	3.16122	0.563415	0.899189	0.313061	-0.394248	0.744798	0.924717	0.243689	0.357891	-0.24195	-0.679625	0.145259	-0.00281089	-0.430517	-0.849668	-0.980065	-1.06103
BC017643	-0.602009	-1.30384	-0.739983	-0.2569	3.49306	0.558098	0.918723	-0.338489	-0.438241	-0.429216	0.605116	-0.654562	-0.199	0.194598	0.591292	0.00322145	0.402691	-0.653511	-0.612505	-0.538543
BC017647	-1.19315	-1.01342	-1.10414	0.0071512	1.52593	-0.983433	-0.98466	-0.457084	0.223978	-0.479266	0.0639751	-0.80717	0.593326	0.282275	0.124721	-0.0680992	-0.211512	0.543299	1.13867	2.79861
BC018507	-0.609533	-1.48961	-1.61565	0.434763	0.57377	0.34584	-0.232027	-0.791857	-0.0369449	1.35142	0.584643	1.9806	1.60661	0.644278	0.15565	-0.048443	0.255115	-1.1754	-0.808454	-1.12477
BC021614	2.02024	-0.292659	1.62758	-0.369022	-0.530273	-0.464386	-0.530273	-0.00565085	-0.463615	-0.362558	-0.492544	2.99878	-0.530273	-0.43402	0.235137	-0.504191	-0.468913	-0.443319	-0.459768	-0.530273
BC024659	0.34795	-1.22986	-0.961534	-0.914808	2.41914	0.708632	2.07056	-0.843714	0.291116	0.0596091	0.606184	-1.2475	-1.0055	0.714792	-0.32354	-0.0656265	0.130343	-0.765474	-0.0479551	0.0571837
BC026590	-0.588745	-1.35961	-0.773536	-1.35961	1.3593	1.04425	1.84027	-1.06826	0.741228	0.597091	1.07168	0.987361	0.278977	0.0698136	0.331529	0.256151	-0.42661	-0.484385	-1.15727	-1.35961
BC028528	-1.2051	-1.2051	-1.2051	-0.498732	1.5371	-0.0449378	-0.600108	0.235793	0.00626412	0.251195	0.177964	-1.2051	0.0994734	2.80232	1.01586	0.567827	0.528384	-0.54792	-0.259801	-0.450266
BC029214	-1.41076	-1.22955	-1.35568	-0.453198	1.1986	-0.160322	0.0468285	2.76528	-0.317598	0.416818	1.49618	0.0282403	-0.0297731	-0.366608	0.296867	-0.809526	-0.710202	-0.093724	0.0272286	0.660883
BC029722	-1.48753	-1.3379	-1.59226	-0.525355	1.15149	0.209247	-0.221097	1.78489	-0.0430972	1.19043	1.55129	1.07549	0.144616	0.643603	0.0750386	0.139656	-0.368433	-0.59808	-0.75454	-1.03746
BC030867	0.997553	-0.956233	-0.956233	-0.166697	-0.956233	0.973475	2.31581	0.717247	0.521928	-0.258957	-0.845758	-0.643996	-0.956233	-0.956233	0.255994	0.219999	1.53601	0.983783	-0.868991	-0.956233
BC031181	-0.788419	-1.79372	-1.05229	3.04301	0.594378	-0.179808	0.301277	0.683376	0.309787	0.182794	1.43119	-0.349793	-0.762478	-0.30969	0.0571464	-0.353262	-0.570657	-0.632879	0.0758089	0.114223
BC031353	-0.39933	-0.405613	-0.363881	4.12374	0.232362	-0.271072	-0.244132	-0.342974	-0.354794	-0.0733884	0.497966	-0.124387	0.100993	-0.210765	-0.347799	-0.346049	-0.331511	-0.363989	-0.369764	-0.405613
BC031781	0.747339	-1.31527	0.904846	-0.704421	2.91213	1.4336	0.56801	-0.698702	-0.491011	0.851693	0.147054	-0.291177	-0.489699	-0.217521	-0.713044	-0.269281	-0.080186	-1.02799	-0.982546	-0.283826
BC032203	-0.774048	-1.49283	-1.49283	-0.363586	-0.563552	0.222918	0.48065	-0.70638	-0.813643	-0.0832128	2.42916	0.351682	1.55527	1.13837	0.851409	-0.0762404	0.809854	-0.161944	-0.525425	-0.785631
BC033916	-0.67465	-0.779302	-0.883819	-0.487399	0.141382	-0.842662	-0.660161	1.93024	-0.207233	0.0225087	1.42849	-0.883819	-0.00844095	2.42503	1.38386	0.246094	-0.2053	-0.658245	-0.608581	-0.677998
BC035044	-0.956211	-0.958356	-0.951509	-0.576264	1.70352	1.22877	1.3322	-1.01105	0.266742	1.12856	0.283932	-0.761942	-0.410898	-0.411041	1.30355	1.17892	0.584094	-1.00764	-0.99271	-0.972671
BC037034	-1.05167	-1.28467	-0.883195	-0.567944	0.0969135	-0.58705	-0.830923	3.24846	0.663741	0.13645	-0.062796	-0.321266	-0.77611	-0.0166454	-0.156404	0.0990681	-0.200196	0.558494	0.727767	1.20798
BC048355	0.938462	-0.689999	-0.756023	-0.756023	-0.415425	1.57289	-0.304216	-0.560994	2.16425	1.84366	-0.756023	-0.713432	-0.756023	-0.641535	-0.278967	1.00596	0.9881	-0.452793	-0.675842	-0.756023
BC051142	-0.235906	-0.235906	-0.235906	4.2443	-0.235906	-0.235906	-0.235906	-0.235906	-0.235906	-0.0379667	-0.235906	-0.235906	-0.235906	-0.235906	-0.235906	-0.235906	-0.235906	-0.19593	-0.235906	-0.235906
BC051226	-0.0920558	-1.26619	-0.817956	-0.795769	2.77973	0.560838	0.379541	0.668746	-0.32875	0.371867	0.0222875	-0.228742	-0.223041	1.87848	0.497128	-0.173799	-0.121983	-0.901552	-0.979243	-1.22953
BC052040	2.78725	-1.06586	0.284231	-0.838289	0.185057	0.687739	1.60566	0.321612	-0.140603	-0.60999	0.255418	0.237871	-1.06689	-0.93412	-0.328572	-0.468756	0.840942	0.420953	-0.977531	-1.19611
BC056474	-0.524897	-2.06357	-2.14722	-0.295059	0.752419	1.0797	0.472385	0.594824	0.706864	0.60033	0.922306	-0.221817	0.603115	0.203302	0.658498	0.844814	0.931158	-0.896405	-1.03643	-1.18432
BC064078	-1.12415	-1.1609	-0.896741	0.17462	1.63747	-0.191864	0.335821	-1.1609	-0.52696	1.47507	1.21297	-0.552197	0.26443	0.824693	0.909861	0.731943	1.26055	-1.06379	-1.0861	-1.06385
BC088983	1.15111	-0.922016	-1.28416	0.596046	-0.151005	0.726044	2.4523	-0.101325	0.0904475	0.815443	-0.0854938	-0.91464	-0.76885	-0.224895	1.22187	0.0609336	0.707153	-0.718692	-1.14824	-1.50202
BC094916	-0.583974	-0.485613	-0.583974	-0.583974	2.22464	1.60474	0.609508	-0.583974	-0.553188	-0.378187	-0.458881	1.45745	2.1475	-0.473366	-0.525591	-0.519087	-0.583974	-0.562112	-0.583974	-0.583974
BC147527	-0.457076	-0.467116	-0.53084	-0.272978	-0.429054	-0.368262	-0.345513	-0.53084	-0.494042	-0.254163	3.85309	0.133551	-0.129357	1.05172	0.645626	0.00285143	0.112544	-0.509905	-0.516342	-0.493894
Bcap29	-0.165933	-1.22135	-0.970931	-0.922455	0.0493729	0.0605498	-0.811801	0.382138	2.12736	2.03805	0.58049	1.12564	-0.0539547	-0.245292	0.565349	0.878096	-0.304917	-0.757592	-1.13148	-1.22135
Bcap31	-0.879607	-2.03044	-1.79849	1.18098	1.14909	0.741867	1.15858	-0.123994	0.237769	0.549091	-0.0438864	-0.138576	0.702579	0.0841058	0.201255	0.872105	1.17294	-0.808157	-0.946656	-1.28056
Bcar3	-0.38339	-0.38339	-0.38339	3.86347	-0.38339	-0.10576	-0.38339	-0.38339	-0.224853	-0.38339	-0.274943	-0.298389	1.51557	-0.352476	-0.288808	-0.299196	-0.38339	-0.117749	-0.141777	-0.207969
Bcas2	2.36971	-1.81689	-0.639701	-0.322114	0.310792	1.15155	1.06667	-0.340465	0.645571	0.442214	0.288603	0.175045	0.0270006	-0.358155	0.0848527	0.243142	0.565018	-0.710282	-1.38588	-1.79668
Bcas3	0.0164963	-1.23446	1.01928	0.985656	2.8834	-0.40156	0.532084	-0.763644	-0.841636	0.648303	0.0853139	0.802124	-0.249141	-0.604751	-0.228769	-0.897615	-0.511001	-1.38573	-0.585481	0.73112
Bcat1	-0.379771	-0.28339	-0.397184	-0.0891212	2.72161	3.01761	0.409523	-0.397184	-0.352967	-0.372997	-0.397184	-0.397184	-0.397184	-0.397184	-0.397184	-0.323721	-0.397184	-0.374944	-0.397184	-0.397184
Bcat2	-0.476465	-1.24609	-1.53874	1.72006	-0.471773	-0.461167	-0.221763	0.197816	2.29018	0.687079	-0.288357	-0.186853	-0.44983	0.129979	1.55129	0.427358	0.522748	-0.121943	-0.638276	-1.42525
Bccip	0.26451	-1.41826	-1.25577	0.101644	1.54412	1.76566	1.38226	-0.597807	0.394908	0.565188	0.534911	0.19636	0.497893	0.0622416	0.0882962	0.448756	-0.274458	-1.26734	-1.4192	-1.61392
Bcdin3d	-1.19154	-1.2591	-1.49849	2.14711	0.537263	1.4827	-0.0353024	0.28397	-0.000143373	-0.150073	0.701223	0.759569	1.71956	-0.440045	-0.00703394	-0.737097	-0.242008	-0.254979	-0.990246	-0.825341
Bckdha	-0.945582	-1.08524	-1.18293	-0.405469	3.13088	0.642361	0.420376	0.211979	0.259995	0.227331	-0.307901	-0.489874	0.0398385	0.999333	0.148422	0.555548	0.640263	-0.882339	-0.988972	-0.988018
Bckdk	0.198661	-1.38046	-1.31816	2.93299	-0.134537	0.377454	0.610037	-0.192898	0.585216	0.38017	0.448189	-0.60854	-0.581773	-0.702542	0.457362	0.0733151	0.836403	0.468029	-0.976529	-1.47239
Bcl10	-1.31053	-1.69368	-1.44907	-0.0638544	-0.189707	-0.27811	0.0136221	1.24576	-0.481819	-0.360469	0.0140467	-0.791814	0.567679	0.974826	0.197123	0.457633	0.949171	-0.55764	0.1289	2.62793
Bcl11a	-0.328093	-0.624	-0.660055	-0.569178	0.304481	-0.00671918	-0.402163	-0.527381	-0.373518	0.82035	3.08718	-0.62623	1.42245	-0.459234	1.64938	-0.430009	-0.407235	-0.571734	-0.638239	-0.660055
Bcl11b	-0.248626	-0.248626	-0.248626	-0.248626	0.0150633	-0.248626	-0.248626	-0.248626	-0.248626	-0.230201	-0.119231	4.23962	-0.248626	-0.248626	-0.175865	-0.248626	-0.248626	-0.248626	-0.248626	-0.248626
Bcl2	-0.502242	-0.498826	-0.497823	0.315429	-0.431806	-0.434177	-0.49893	-0.198305	-0.285263	0.953649	-0.223614	3.77384	0.856951	-0.445533	0.433738	-0.38259	-0.44032	-0.487797	-0.498104	-0.508281
Bcl2a1b	-0.508309	-0.267806	-0.493139	1.03453	-0.587249	-0.523493	-0.587249	-0.587249	-0.455126	-0.492437	-0.465677	2.53142	2.73735	0.805928	-0.21752	-0.427931	-0.473942	-0.260633	-0.286491	-0.474971
Bcl2a1d	-0.579726	-0.532108	-0.649148	1.6061	-0.649148	-0.625299	-0.649148	-0.649148	-0.396935	-0.649148	-0.649148	1.23888	2.10135	1.55322	1.78907	-0.575416	-0.383502	-0.169774	-0.481827	-0.649148
Bcl2l1	-0.169505	2.83613	2.90772	-0.420897	-0.142179	0.0730364	0.240182	-0.427445	-0.415653	-0.318336	-0.440088	-0.297515	-0.46721	-0.415928	-0.477312	-0.442841	-0.406373	-0.418051	-0.406744	-0.390986
Bcl2l11	0.587373	-0.973494	-1.08376	2.46593	0.224463	-0.0526467	0.440925	-0.614476	-0.719468	-0.480984	-0.546169	2.60818	0.0955807	0.699698	-0.202356	-0.403978	-0.508883	-0.148181	-0.816851	-0.5709
Bcl2l12	-0.560214	-1.19633	-1.37008	-1.05523	1.28598	1.5923	1.50528	0.850091	0.971837	1.05615	-0.00426185	-0.790574	-0.148807	-0.394287	0.75809	0.187172	0.365429	-0.534374	-1.1481	-1.37008
Bcl2l13	3.38642	-0.92872	1.35289	-0.626486	-0.407399	0.649488	0.659236	-0.682441	0.533434	0.264838	-0.442442	-0.0514378	-0.757461	-0.37902	-0.406732	0.0659608	-0.336672	-0.256964	-0.820946	-0.815544
Bcl2l2	-0.517935	-0.723557	-0.723557	1.63568	3.39101	-0.616887	-0.16895	-0.490974	0.151004	0.500861	0.770269	-0.374024	-0.723557	0.234807	-0.445818	-0.184779	0.0260577	-0.482932	-0.533157	-0.723557
Bcl3	-0.908141	-0.834307	-0.822411	-0.467402	-0.289566	-0.644861	-0.555925	-0.908141	-0.600082	-0.4064	1.1276	-0.291939	1.86115	2.03096	0.315195	0.9443	1.83018	-0.598521	-0.878666	0.0969826
Bcl7a	-0.394413	-0.431286	-0.478498	-0.421992	2.80692	1.68743	2.3295	-0.375463	-0.361679	-0.248342	-0.324037	-0.432388	-0.193216	-0.479488	-0.396057	-0.417463	-0.444444	-0.461317	-0.48133	-0.482445
Bcl7b	0.157247	-1.65688	-1.72353	-0.522613	1.42901	0.232374	1.4867	-0.128615	-0.672311	0.369808	1.23627	1.14661	0.380038	0.272189	1.14168	-0.335027	0.320714	-0.754341	-0.971794	-1.40753
Bcl7c	-0.188462	-1.34527	-1.35088	-0.340479	-0.20046	0.831261	0.446804	-0.395878	0.30633	1.74239	2.08267	-0.236312	-0.0823415	-0.399147	1.74877	-0.0194667	0.241834	-0.302485	-1.216	-1.32287
Bcl9l	-0.679256	-0.709066	-0.709066	-0.709066	-0.190601	-0.0255738	-0.0823812	-0.192979	-0.59135	1.24038	1.24039	3.44017	-0.0723841	-0.46555	0.650222	-0.447709	-0.163699	-0.623745	-0.537292	-0.371442
Bclaf1	0.399723	-1.77724	-1.49165	-0.134225	0.859559	1.14611	1.95773	0.382911	0.295539	1.4109	0.280012	0.312817	0.523303	-0.381912	0.205454	-0.132599	-0.176083	-0.939914	-1.32752	-1.41291
Bcor	-0.253629	-0.993431	-1.30752	0.528271	-0.38777	1.63561	2.64695	-0.123486	-0.282392	1.33276	0.54413	-0.246618	0.282661	-0.192858	-0.0130682	-0.0358206	0.147504	-0.760876	-1.2129	-1.30752
Bcr	-0.766184	-0.648356	-0.662392	-0.583554	3.25433	0.835649	1.28515	-0.274138	-0.320336	0.439977	1.25331	-0.621348	-0.515653	-0.520557	0.262879	-0.372222	-0.279315	-0.706036	-0.704401	-0.356802
Bcs1l	-0.488908	-1.08371	-1.48578	1.22257	1.17583	-0.33998	-0.080876	-0.198672	0.941005	1.59222	-0.475582	0.320728	2.16512	-0.274258	0.0213425	0.49671	-0.61934	-0.648866	-0.75377	-1.48578
Bdp1	0.603462	-1.88031	-1.49987	0.449086	0.027849	0.442676	1.70041	1.19178	-0.401749	0.339965	0.0166907	0.30797	0.722513	0.363327	1.02379	0.28036	0.372156	-0.927685	-1.36314	-1.76928
Becn1	0.753484	0.618129	1.22525	0.398727	2.25036	1.62181	0.812593	-1.50859	0.0301286	-0.669851	-1.08003	-0.927477	-0.880014	0.227175	-0.259593	-0.175972	0.196768	-0.808892	-0.945255	-0.878749
Bend5	-0.46915	-0.26156	-0.46915	1.74748	0.756627	-0.288914	-0.350135	-0.46915	-0.45841	0.354339	-0.347974	-0.225545	3.54736	-0.426931	-0.392504	-0.43435	-0.417366	-0.46915	-0.456362	-0.46915
Bet1	-0.648478	-0.975241	-0.994314	3.42693	0.357649	-0.214076	-0.0245185	0.519781	1.17301	0.21355	0.728679	-0.64529	-0.546594	-0.127537	-0.294638	0.360761	-0.259779	-0.517006	-0.623673	-0.909219
Bet1l	-1.10291	-2.14429	0.309662	0.596695	1.15998	-0.882715	-0.689671	0.280941	-0.050906	0.209979	1.69131	0.3957	1.31654	0.583311	1.20827	-0.393856	0.460385	-1.13668	-1.1859	-0.62584
Beta-s	0.674214	3.18859	2.4549	-0.369853	-0.384791	-0.382801	-0.386573	-0.341512	-0.384937	-0.360331	-0.359128	-0.333571	-0.362598	-0.369166	-0.380972	-0.380304	-0.382117	-0.379333	-0.377793	-0.381931
Bex1	0.481611	-0.375062	-0.375062	-0.375062	0.434247	0.124821	-0.375062	-0.375062	-0.0110995	4.0807	-0.375062	-0.375062	-0.375062	-0.375062	0.0492946	-0.28377	-0.375062	-0.375062	-0.375062	-0.375062
Bex4	3.89498	-0.365923	1.18743	-0.365923	-0.365923	-0.305826	-0.365923	-0.365923	-0.323014	0.66368	-0.365923	-0.269706	-0.365923	-0.347446	-0.184756	-0.360758	-0.339278	-0.336117	-0.351809	-0.365923
Bex6	-0.530916	-0.534262	-0.534262	-0.4797	-0.293533	-0.464789	-0.534262	-0.534262	0.295801	2.69137	0.416209	-0.504646	-0.534262	-0.300719	2.76068	0.675769	-0.0154481	-0.515056	-0.529457	-0.534262
Bfar	-0.981763	-1.51299	-1.4989	1.62829	1.40274	0.378041	-0.174056	-0.060233	0.682528	1.00642	1.05498	0.445484	0.607801	0.620891	-0.162683	0.35265	0.0509246	-1.08356	-1.2509	-1.50567
Bfsp2	-0.372066	-0.348858	-0.36574	-0.263364	3.86086	1.48249	0.0137557	-0.108918	-0.380788	-0.243286	-0.316372	-0.371714	0.028899	-0.366689	-0.357593	-0.378139	-0.380777	-0.368933	-0.376697	-0.386073
Bhlha15	-0.261678	-0.261678	-0.261678	4.21894	-0.261678	-0.232866	-0.261678	-0.261678	-0.199904	-0.261678	0.263848	-0.261678	-0.15239	-0.261678	-0.261678	-0.234141	-0.261678	-0.261678	-0.261678	-0.261678
Bhlhb9	-0.664626	-0.762439	-0.936178	0.0110291	1.64538	0.841163	0.446192	0.449529	0.770668	2.57776	0.861207	-0.299479	-0.739727	-0.889126	0.638878	-0.264795	-0.936178	-0.876904	-0.936178	-0.936178
Bhlhe40	-0.671958	-0.743595	-0.743595	-0.545662	-0.433981	-0.647703	-0.587908	-0.589832	-0.302442	-0.411111	0.671977	0.343696	1.74797	-0.159832	3.4119	-0.320692	-0.257593	0.21166	0.210441	-0.181736
Bicd2	-0.00520016	-1.26571	-1.38554	-1.08154	-1.15459	0.21826	2.45249	0.529301	-0.033331	0.414624	-0.209669	0.133055	-0.712353	0.0367723	0.737663	0.839382	1.7329	0.441512	-0.939278	-0.748745
Bid	-0.89328	-1.45679	-1.40907	0.530963	2.46503	-0.438009	-1.01013	0.261399	1.25715	0.065017	-0.386533	-0.495911	0.0986131	-0.108454	0.655623	1.1343	1.15932	-0.806626	-0.835269	0.212668
Bin1	-0.793004	-0.747939	-0.721052	-0.702431	3.72055	0.405202	0.111743	0.15218	-0.0330147	0.145867	-0.213494	-0.0740924	0.679804	-0.287582	0.772259	-0.112014	-0.191345	-0.645554	-0.713097	-0.752987
Bin3	-1.22295	-1.62897	-1.77227	-1.29478	0.165996	-0.704634	-0.415816	1.00898	0.265667	0.211834	0.820544	-1.09944	0.170424	1.35497	0.945248	-0.0808886	0.0356141	1.19968	1.1489	0.891883
Birc2	-0.015212	-1.13576	-0.561494	2.7564	1.74007	0.276937	0.997853	-0.948396	-0.628012	0.0528167	0.0456663	-0.201596	1.36361	-0.684601	0.00162248	-0.88682	-0.507858	-0.366915	-0.588869	-0.709442
Birc3	-1.29379	-0.927202	-1.22046	0.192487	2.62531	-0.0331842	0.040496	-0.16293	-1.08082	-0.451932	0.120642	0.257938	2.10818	1.17317	-0.0646829	-0.214619	-0.0940082	-0.816931	-0.129447	-0.0282105
Birc5	2.49152	-0.694056	-0.0360404	-0.682945	-0.720284	0.23849	2.26906	-0.136883	-0.191166	-0.52055	-0.727759	-0.675272	-0.721718	-0.736178	0.515582	-0.0706726	1.50565	0.360271	-0.724893	-0.742159
Birc6	-0.434733	-1.79322	-1.89457	0.295522	1.17553	1.2763	1.33101	-0.0359729	-0.215031	0.462812	0.875526	1.03999	-0.292445	0.120903	0.530768	0.307177	0.647458	-0.747702	-1.14793	-1.50138
Blcap	-0.885181	-0.822814	-0.991199	-0.603962	0.596578	-0.613246	-0.752659	2.25514	0.34678	0.613683	2.52253	-0.296262	0.905664	-0.388541	-0.0943032	-0.326836	-0.707451	-0.775068	-0.571081	0.588232
Blk	-0.563551	-0.544943	-0.500674	0.329854	-0.195944	1.63605	2.4858	-0.509659	-0.556124	-0.226927	-0.364979	-0.396023	2.5353	-0.536142	0.134532	-0.522376	-0.563551	-0.54912	-0.553926	-0.537598
Blm	3.10081	-0.789079	-0.656906	-0.802734	-0.878731	0.736048	1.21507	0.860661	0.140189	0.588927	-0.720196	-0.518052	-0.756767	-0.722765	0.663931	0.0620392	0.236559	-0.0878969	-0.868163	-0.802937
Blmh	-0.716988	-1.42024	-1.49065	0.441589	1.66551	1.48947	1.86109	-0.00493796	-0.00548476	0.602208	0.680461	-0.519118	-0.704825	0.0191685	0.278235	0.548559	0.448526	-0.849287	-1.11867	-1.20462
Blnk	-0.530728	-0.511099	-0.545957	0.272343	3.31198	1.11884	1.63141	-0.541784	-0.55104	-0.377116	0.457085	-0.536675	0.341715	-0.506625	-0.281847	-0.544847	-0.556787	-0.546167	-0.549706	-0.552993
Bloc1s1	-1.36023	-1.99421	-1.86215	-0.728342	1.64456	-0.01571	0.481333	-0.0755056	-0.185451	0.117672	0.915854	-0.40784	-0.0876581	1.26099	-0.0138458	1.17862	1.42376	-0.371551	0.14896	-0.0692647
Bloc1s2	-0.772188	-0.987855	-0.950359	-0.809361	-0.188995	0.566389	0.358987	-0.120087	0.0285602	0.503156	2.89698	-0.525211	-0.118146	-0.0706628	2.17371	0.302916	-0.0953236	-0.734943	-0.740442	-0.717127
Bloc1s3	-1.00899	-1.57899	-1.49631	0.723603	0.722603	-0.942328	0.416641	1.60507	-0.868051	-0.204223	1.02172	-1.02951	0.171795	1.42488	0.020967	-0.441563	-0.442069	-0.489096	0.960195	1.43365
Blvra	1.02626	-0.792103	-1.03349	0.695616	-0.641514	-0.368543	-0.49026	-0.273584	0.0578584	0.247987	-0.227416	-0.228898	-0.87113	1.79787	0.663336	1.50025	2.11408	-0.689685	-1.15054	-1.33609
Blvrb	3.10109	1.23976	2.26866	-0.409357	-0.443655	-0.310503	-0.114136	-0.382979	-0.470125	-0.381399	-0.317825	-0.462556	-0.332525	-0.358213	-0.376466	-0.439016	-0.395617	-0.468446	-0.478253	-0.468437
Bmf	-0.753646	-0.616994	-0.753646	0.15473	1.31408	0.477472	0.0346641	-0.753646	-0.72959	-0.555046	-0.522553	-0.666262	1.34396	3.13986	0.720013	-0.203452	-0.663527	-0.651715	-0.502912	0.188214
Bmi1	-0.833695	-1.08514	-1.2157	1.31899	0.204867	0.987348	0.865966	-0.295383	-0.192964	1.16554	0.728037	-0.0128956	2.47484	-0.677695	0.234317	0.0123724	-0.913172	-0.738202	-1.18198	-0.845449
Bmp2k	0.783726	-0.519176	1.23028	-0.681761	-0.540092	-0.495603	-0.6297	-0.757936	-0.659312	0.572163	3.19046	-0.658053	0.723234	-0.112714	1.11231	-0.470393	-0.181874	-0.536912	-0.644673	-0.723981
Bms1	-0.0778234	-1.3455	-0.96993	-0.649557	2.34952	1.31684	1.60762	-0.111527	-0.0125623	0.728819	0.019531	-0.0183815	0.294118	0.089933	0.0381098	0.0931455	0.502452	-0.997599	-1.38706	-1.47014
Bmx	-0.489872	-0.319394	-0.463366	-0.489872	-0.382257	-0.489872	-0.447979	-0.231248	-0.413273	-0.484701	-0.472773	-0.375267	0.0194319	0.263015	-0.489872	0.01155	0.275037	-0.233827	1.4331	3.78143
Bmyc	-0.651919	-0.59419	-0.614118	0.0374461	-0.250866	-0.474216	-0.64275	-0.551961	-0.383316	0.703073	3.24623	-0.305095	0.095788	0.250652	2.03542	0.144727	-0.050112	-0.64981	-0.685048	-0.659938
Bnip1	0.0547143	-1.29161	-1.43486	-0.71334	1.12128	0.395733	1.17195	-0.392511	0.546137	-0.535817	1.92754	0.20813	1.67651	-0.343067	0.594469	0.418501	0.0254115	-0.891618	-1.22755	-1.31001
Bnip2	-0.239567	-1.98706	-1.72527	-1.18132	0.66423	0.775705	1.10757	-0.607484	0.0903719	0.139167	-0.113329	-0.771475	-0.791579	0.945797	1.94648	0.842159	1.09857	0.181633	-0.0905509	-0.284042
Bnip3	-1.20003	-0.887029	-1.30456	-1.40855	1.93871	1.52294	0.862455	0.969822	0.289066	0.632374	0.226791	-1.09214	-1.0825	0.525928	-0.382532	0.186886	-0.0230037	-0.730536	-0.220799	1.1767
Bnip3l	0.23361	3.01717	2.74243	-0.391292	-0.170094	-0.51319	-0.49411	-0.40307	-0.339332	-0.351932	-0.325517	-0.453084	-0.370376	-0.203929	-0.466438	-0.383584	-0.459581	-0.317186	-0.141857	-0.208634
Bod1	-0.460944	-1.0138	-1.15132	0.925477	0.815605	1.00163	-0.547886	-0.700936	-0.577839	2.58334	0.843522	0.206787	0.592104	-0.0690034	0.955758	0.447736	-0.60188	-1.05226	-1.04477	-1.15132
Bod1l	0.198241	-1.99718	-1.68805	-0.0876165	2.01859	1.10162	0.914489	-0.309789	-0.396983	0.378313	0.999212	0.77867	1.10127	-0.165388	0.117902	-0.0232831	-0.131986	-0.723124	-1.14363	-0.94127
Bok	-0.304968	-0.304968	-0.304968	-0.304968	-0.304968	4.18222	-0.304968	0.203974	-0.304968	0.185834	-0.304968	-0.304968	-0.304968	-0.304968	0.156217	-0.253634	-0.304968	-0.304968	-0.205059	-0.304968
Bola1	0.676046	-1.25816	-1.37224	0.572808	-0.654285	0.646091	1.08825	0.66264	1.86569	1.42971	1.09303	-0.555763	-0.379645	-0.297423	0.269072	0.0851211	-0.0764438	-0.99484	-1.28903	-1.51065
Bola2	-0.381174	-1.3693	-1.21588	0.140735	-0.425128	0.650841	-0.682837	-0.154024	2.41724	1.10241	-0.31648	1.02892	0.513411	0.463031	-0.364401	1.2579	0.393905	-0.348442	-1.24054	-1.47018
Bola3	2.76017	0.478897	2.78993	0.00837848	-0.385802	0.180907	-0.268723	-0.361566	0.00167757	-0.174237	-0.273193	-0.167373	-0.413435	-0.678506	-0.435884	-0.362199	-0.459717	-0.647075	-0.777798	-0.814451
Bop1	-0.644074	-1.32599	-1.46103	1.70828	0.540898	1.79883	0.503025	-0.0351915	0.910672	0.747346	-0.0829352	-0.349857	0.0865831	-0.492817	0.736582	1.11069	-0.130791	-1.00734	-1.27247	-1.34042
Bpgm	-0.207313	3.78172	1.72927	-0.304678	-0.3189	-0.309424	-0.328373	-0.270093	-0.331267	-0.291577	-0.294871	-0.2549	-0.279892	-0.3166	-0.330721	-0.324109	-0.331428	-0.338281	-0.334856	-0.343704
Bphl	-0.719498	-0.987483	-1.0917	-0.294282	1.84018	-0.169612	-0.329699	-0.741958	1.4326	2.22353	0.754275	-0.456494	-0.700605	0.360417	0.149357	1.14027	0.247992	-0.989935	-0.888817	-0.778522
Bpnt1	-1.05348	-1.13527	-1.2023	2.81103	-0.0903171	0.513615	-0.437305	0.0435882	0.0330642	0.0835286	0.70473	0.419165	0.428954	0.683833	0.394265	1.11482	0.164549	-1.13678	-1.13738	-1.2023
Bptf	-0.756675	-1.34542	-1.15935	-0.5465	2.55609	0.930561	1.0947	-0.246521	-0.738275	1.14481	0.378438	0.606738	1.07585	-0.343781	0.483564	-0.523998	-0.0664076	-0.82397	-0.824111	-0.895735
Braf	-1.3772	-1.38803	-0.885359	0.4347	0.466168	-0.785099	-0.50124	-0.406724	-0.57724	-0.151058	-0.103372	-0.493829	1.37199	0.163587	0.193699	-0.617574	0.988789	-0.344767	1.34747	2.66509
Brap	0.917038	-2.0806	-0.896259	-0.903872	-0.835016	1.14084	1.11325	2.17849	0.00602464	0.568715	0.0797741	0.243535	-0.280657	0.190213	0.737957	0.430854	0.0332959	-0.653375	-1.53508	-0.455125
Brca1	3.1822	-0.670548	-0.611169	-0.549444	-0.723693	1.23976	1.63774	-0.218914	0.192405	0.0823251	-0.601911	-0.674754	-0.703319	-0.698829	0.110087	0.0192165	0.0693385	0.3259	-0.682693	-0.723693
Brca2	3.43242	-0.785743	-0.611359	-0.647608	-0.785743	1.05257	0.358751	0.241798	0.529419	0.919551	-0.558999	-0.523451	-0.580857	-0.735319	0.156495	0.209716	-0.170578	0.0511673	-0.766484	-0.785743
Brcc3	0.708495	-1.62641	-0.812685	0.933119	0.502841	1.31371	1.51003	0.56236	0.444461	0.453207	0.00238953	-0.380308	-0.563561	-0.906821	0.635605	0.254531	1.00155	-0.468683	-1.6896	-1.87423
Brd1	-0.0801186	-1.47866	-1.55726	-0.239501	0.501056	0.691374	1.48755	-0.664678	-0.474872	2.10929	1.53116	-0.230073	-0.661835	0.41293	1.0092	-0.145767	0.200081	-0.412103	-0.911258	-1.08652
Brd2	-0.705786	-1.63865	-1.57928	1.03602	0.821857	0.890968	1.23047	0.813892	-0.661587	0.874385	1.14781	-0.00290334	0.943718	0.0442566	0.733958	0.0695671	-0.34466	-1.08492	-1.30085	-1.28826
Brd3	0.0884917	-1.57386	-1.45492	-0.812297	-0.00892142	1.97173	2.43337	-0.259812	-0.00249047	1.14319	0.485228	-0.788092	-0.301464	-0.748378	0.669362	-0.0816513	-0.583453	0.159006	0.124915	-0.459956
Brd4	0.0506725	-1.77806	-1.31426	0.610354	1.23353	1.11802	2.09463	-0.741688	-0.558018	1.01212	0.338225	-0.282219	0.200152	-0.120492	0.984104	-0.0849124	0.300612	-0.646414	-1.068	-1.34836
Brd7	0.457974	-1.73647	-1.50171	-0.953687	1.99596	0.77076	1.93401	0.0940198	0.185869	0.722657	0.0984092	-0.993181	-0.56685	0.243223	0.536432	0.38752	0.498066	-0.480627	-0.865346	-0.827023
Brd8	0.683416	-1.26871	-0.898078	-0.867703	0.645363	1.02795	3.03363	0.0823287	-0.176738	0.164984	-0.551337	-0.599904	-0.0872589	-0.797335	0.841901	-0.0936699	0.956933	-0.317415	-0.89109	-0.887268
Brd9	-0.54706	-1.59688	-1.5394	-1.01523	1.90491	0.902418	1.37393	0.430527	0.0444931	-0.497263	0.0437433	0.591675	-0.942671	-0.427296	0.361428	0.331741	1.74581	0.221883	-1.0556	-0.331159
Bre	0.256184	-1.86313	-1.24854	0.696858	1.22925	-0.560439	-0.114818	0.695259	0.269333	-0.172142	-0.943718	-0.870449	-0.607399	1.23012	0.313491	0.340068	2.41777	-0.471687	-1.00678	0.410767
Brf1	1.18154	-1.9161	-0.977108	-0.552005	0.719635	0.764117	2.38108	0.0412646	-0.57823	0.786974	0.505769	-0.48066	0.123325	-0.272758	0.897462	-0.0154744	0.423275	-0.977946	-1.42645	-0.627713
Bri3	-1.10053	-1.13841	-1.42486	-0.583141	-0.0244794	-0.235364	0.12555	-0.704079	-0.603892	-0.194147	0.830658	-0.606564	-0.232774	2.9898	0.981793	0.874272	1.14983	-0.177983	-0.0546963	0.129023
Bri3bp	-0.55927	-1.01213	-1.02588	-0.258982	-0.525166	-0.304451	-0.854551	2.55147	1.01562	0.446892	1.54676	-0.728942	-0.303789	0.763773	1.00084	0.724601	0.247135	-0.739054	-0.987762	-0.997106
Brip1	0.203725	-0.750233	-0.786914	-0.694157	-0.651628	1.08549	3.08534	-0.342279	-0.0382374	0.166709	-0.661665	-0.670922	-0.74353	-0.753103	0.590248	0.515245	1.32201	0.674139	-0.763331	-0.786914
Brix1	-0.0122835	-1.18899	-1.15123	0.425435	1.13661	1.97465	2.49335	-0.121815	0.146141	0.415078	-0.473043	-0.267682	0.218457	-0.521547	0.166819	0.175078	-0.111793	-0.815781	-1.14863	-1.33882
Brms1	-0.756783	-1.87804	-1.71311	-0.42435	0.326176	0.162416	0.489678	0.778971	0.64943	0.573322	0.340282	0.147274	0.636623	0.803447	0.350126	1.60993	1.34624	-0.686706	-1.18497	-1.56995
Brms1l	1.55974	-1.04629	-1.21276	0.302122	-0.380107	1.81477	1.58896	1.25735	-0.242632	0.286096	0.932682	-0.250035	-1.21276	-0.478224	0.35066	0.139027	-0.234865	-0.940265	-1.02071	-1.21276
Brox	1.27317	-1.44665	-0.624517	-1.12533	2.02474	-0.186621	1.72642	1.54292	-0.732014	0.0911901	0.205232	-0.962349	0.296681	-0.0712277	0.191745	0.101257	0.34024	-0.907722	-0.739637	-0.997519
Brp44	0.182466	0.0397395	0.849312	0.375236	-0.779013	-0.683516	-0.61246	3.50088	-0.483645	-0.553953	-0.60522	-0.874636	-0.941657	-0.224111	-0.61902	-0.161729	0.0277831	-0.0844095	0.906349	0.741609
Brp44l	-0.52347	-1.82427	-1.95473	-0.0317436	-0.750879	-0.356994	-0.728163	1.56292	2.03991	-0.370216	0.978295	-0.750588	-0.409626	0.679228	0.597849	0.804584	0.572982	0.237497	-0.0421968	0.269614
Brpf1	0.510353	-1.96824	-1.89715	-0.75313	0.898769	1.16995	1.2637	-0.856473	-0.259305	0.457746	-0.15298	-0.874614	0.101207	1.35656	0.508884	1.23681	0.769667	-0.223702	-0.733188	-0.55487
Brpf3	2.28762	0.0194443	3.42911	-0.34601	-0.400507	-0.351575	-0.145379	-0.343625	-0.425652	-0.243442	-0.32534	-0.323367	-0.321547	-0.380711	-0.323244	-0.407336	-0.386344	-0.285789	-0.376801	-0.349506
Brwd1	-0.751401	-1.06869	-1.08556	2.00419	-1.03606	0.284526	0.230026	-0.00471192	0.110514	1.35168	1.28631	0.124739	2.16784	-0.332475	0.156289	-0.356631	-0.804632	-0.6782	-0.664934	-0.93282
Brwd3	-0.512069	-1.77917	-1.77917	-1.77917	0.930838	-0.0760995	1.31375	1.34286	-0.186204	0.896309	1.50632	-0.716753	0.687494	0.320241	-0.214776	0.364539	0.452823	-0.369931	-0.346471	-0.0553676
Bscl2	-0.838331	-1.31058	-1.2012	1.34837	-0.387491	-0.916663	-0.682985	0.414636	0.0390488	0.292758	1.33683	0.229924	-0.500393	1.52684	1.01446	1.1467	1.37495	-0.655148	-0.999935	-1.2318
Bsdc1	0.609658	1.49521	3.77962	-0.340849	-0.291327	-0.369172	-0.359349	-0.153924	-0.419931	-0.342924	-0.255252	-0.369879	-0.416891	-0.326006	-0.344323	-0.397662	-0.397174	-0.413587	-0.345465	-0.340779
Bsg	3.30674	-0.0999311	2.34361	0.103221	-0.249344	-0.386803	-0.421606	-0.179291	-0.111137	-0.198592	-0.246321	-0.467892	-0.514424	-0.387095	-0.182411	-0.166047	-0.190381	-0.547791	-0.676941	-0.727565
Bsn	0.63971	-0.718428	-0.718428	-0.718428	-0.0451594	1.07402	-0.718428	-0.321388	1.23932	3.15647	0.933386	-0.568077	0.501955	-0.521993	-0.199677	-0.215223	-0.718428	-0.644352	-0.718428	-0.718428
Bst1	-0.520564	-0.401788	-0.360305	-0.526113	2.94676	0.321818	0.312509	-0.507747	-0.508007	-0.502206	-0.463466	-0.414251	-0.0733354	0.0785734	-0.500519	-0.440413	-0.472138	-0.506665	-0.139233	2.67709
Bst2	-0.290766	-0.335455	-0.330728	-0.109429	-0.252761	-0.296005	-0.331087	-0.288667	-0.262453	-0.092108	4.14736	-0.281504	-0.310801	-0.123437	0.642882	-0.210196	-0.262605	-0.331497	-0.343617	-0.337127
Btaf1	2.60192	-1.51709	-0.063343	0.943534	-0.162313	-0.323107	-0.174556	-0.304954	-0.331508	1.40249	1.00221	-0.278672	0.633913	0.0928144	0.430295	-0.157316	0.0239309	-0.969631	-1.38847	-1.46015
Btbd1	-0.472153	-2.18164	-2.19693	1.00354	0.584072	0.913256	0.578617	1.38679	0.495777	0.231109	-0.552867	-0.108679	0.175693	0.204156	0.257766	0.579277	1.20624	-0.0362102	-1.21456	-0.853257
Btbd10	-0.309668	-0.987309	-1.21035	-0.494853	2.51093	0.962662	2.69928	-0.205362	-0.596223	-0.414823	-0.537006	-0.228858	-0.434499	-0.537248	0.0526621	-0.29441	-0.110306	0.293162	-0.317645	0.159873
Btbd19	-0.403258	-0.81182	-1.16758	-0.713248	-1.16758	0.379979	0.0180859	1.6527	-0.0408052	1.2872	-0.582302	2.08461	0.913071	-0.364369	-0.368863	-0.323426	-0.967727	-0.980987	-0.0605041	1.61683
Btbd2	-0.784507	-1.28308	-1.49064	-1.49064	1.1426	-0.579588	-0.844847	0.602081	0.693583	0.91177	1.29626	-0.176769	0.533885	0.340556	1.21032	1.03722	1.26956	-0.558094	-0.997812	-0.831863
Btbd3	-0.436498	-0.456817	-0.456817	-0.456817	1.52775	-0.400572	-0.456817	-0.456817	-0.238534	1.00974	3.45281	-0.456817	-0.456817	-0.371038	0.860209	-0.378869	-0.456817	-0.456817	-0.456817	-0.456817
Btbd7	-0.677014	-0.997595	-1.10762	-1.14837	3.31519	-0.466532	0.421199	0.599721	-0.637388	0.349036	0.859962	0.280592	-0.610017	-0.172761	0.514675	-0.0322764	0.387257	-0.972364	-0.218838	0.313144
Btbd9	-1.16215	-1.26825	-1.33398	-0.585552	2.66673	0.413492	0.674047	-0.860825	-0.00334251	1.02516	0.727329	0.330438	0.910607	-0.144103	1.03156	-0.450588	0.143924	-0.465443	-0.687648	-0.961408
Btd	-0.484039	-0.633861	-0.628541	3.87649	0.541654	-0.143523	-0.220016	0.590381	-0.307075	0.344477	0.326277	-0.51818	-0.471113	-0.173295	0.321912	-0.340439	-0.313872	-0.474926	-0.568131	-0.724183
Btf3	-0.0809462	-1.76379	-1.31744	-0.566564	2.11722	1.01796	0.0751489	-0.0754156	0.747327	0.873957	0.205723	0.391905	0.403698	0.646315	0.604879	0.640809	0.0785127	-1.11965	-1.35542	-1.52423
Btf3l4	-0.345813	-1.73596	-1.59658	0.622703	0.31216	1.12398	2.35775	-0.544327	0.363421	0.39484	-0.0943747	-0.611762	0.389358	0.00429447	0.774111	0.321958	1.00182	-0.242258	-1.168	-1.32732
Btg1	-1.07531	-0.994512	-0.904885	-1.02216	0.281934	0.422754	0.158384	0.141327	-0.999923	-0.732785	1.36973	1.41297	2.39899	0.6106	-0.184643	-0.580375	-0.416771	-0.786895	-0.438052	1.33962
Btg2	0.342138	-1.94023	0.629462	0.681336	1.48672	0.321973	0.646066	0.779137	-1.88831	-0.527523	1.04895	0.377065	0.500311	0.306174	0.665601	-0.819979	-0.267053	-1.70891	-1.08513	0.452192
Btk	-1.27307	-1.3984	-1.43068	-0.321244	1.77661	1.06392	1.39703	0.849239	-0.108981	0.612934	-0.144632	-1.5224	1.74164	-0.0913532	-0.076239	-0.101643	-0.00613234	-0.626247	-0.368248	0.027897
Btla	-0.704367	-0.704367	-0.607586	1.19371	-0.579206	-0.509004	-0.616274	-0.629959	-0.594162	-0.40591	0.401929	-0.19609	3.05781	0.576921	1.66047	0.450327	0.263488	-0.663868	-0.689487	-0.704367
Btnl10	2.59165	-0.149975	3.22065	-0.341334	-0.341334	-0.319717	-0.341334	-0.341334	-0.33696	-0.341334	-0.302848	-0.341334	-0.341334	-0.326034	-0.316963	-0.341334	-0.321701	-0.324757	-0.341334	-0.341334
Btnl9	-0.408456	-0.408456	-0.408456	-0.408456	-0.408456	-0.408456	-0.408456	3.96436	0.591464	0.586777	-0.408456	-0.408456	-0.408456	-0.324329	-0.316562	-0.316686	-0.408456	0.628659	-0.193787	-0.126878
Btrc	1.50659	-0.322896	2.65325	-0.432969	0.550531	0.778823	2.11297	-0.612662	-0.49894	-0.419452	-0.00239623	-0.650324	-0.378663	-0.598713	-0.445312	-0.642019	-0.627598	-0.632969	-0.656075	-0.68117
Bub1	1.04946	-0.632191	-0.510683	-0.57941	-0.654399	0.414861	3.54783	-0.072098	-0.0518525	-0.228262	-0.634139	-0.611945	-0.627642	-0.626882	0.303952	-0.0875408	1.1049	0.124882	-0.610563	-0.618279
Bub1b	0.638489	-0.643417	-0.539388	-0.596364	-0.575146	0.723753	3.37129	-0.291538	-0.295491	-0.334248	-0.57734	-0.672236	-0.551075	-0.549839	0.651045	0.000500799	1.51857	0.0655379	-0.663265	-0.679837
Bub3	0.313247	-1.02252	-0.930581	-0.424929	0.141993	0.558882	3.46848	0.0891904	-0.0599878	-0.311064	-0.590747	-0.475366	-0.485358	-0.386575	0.160162	-0.0728325	1.45055	0.141657	-0.77302	-0.791184
Bud13	-0.528364	-1.75765	-1.84761	-1.19232	0.208482	1.09183	1.85007	0.161603	0.155048	0.246227	-0.479073	0.568514	0.990614	-0.0971154	1.16524	0.101891	1.33364	-0.675369	-0.79161	-0.504057
Bud31	1.39455	-1.45875	1.96613	0.503039	2.13443	1.10924	0.76228	0.134518	-0.71146	-0.642522	-0.771993	-1.16471	-0.692589	-0.340181	-0.457762	-0.175909	-0.200172	-0.571396	-0.496948	-0.319786
Bysl	1.46581	-1.44292	-1.26524	2.72703	0.0603702	1.1831	0.221904	-0.690799	0.520352	0.388927	-0.776895	0.0395774	-0.335087	0.141084	0.476935	0.265879	-0.473586	-0.847467	-0.715663	-0.943315
Bzrap1	-0.536576	-0.625775	-0.347397	1.77082	0.734971	0.967051	-0.0116802	-0.281183	3.11409	-0.570188	-0.349226	-0.809845	-0.525197	-0.751638	-0.318387	0.661807	-0.184298	-0.522769	-0.604732	-0.809845
Bzw1	-0.727136	-1.44794	-1.43366	0.14746	0.297114	1.47261	2.28589	-0.462564	-0.019906	0.374661	0.982995	-0.478853	-0.191761	-0.304352	1.36548	0.646001	0.255725	-0.541161	-0.987558	-1.23304
Bzw2	-0.464999	-0.92726	-1.03564	-0.922518	0.770168	1.77678	0.336276	-0.603438	1.58511	2.25542	0.279164	0.508732	-0.0786961	-0.650411	0.200757	0.43047	-0.491551	-0.97457	-0.958156	-1.03564
C030006K11Rik	-0.496447	-0.891712	-1.20611	-0.0217641	-0.327	1.03457	0.00503767	0.338304	0.888272	1.75645	2.33663	1.32277	0.0916775	-0.61922	-0.372953	-0.438096	-0.260973	-0.885484	-1.04785	-1.20611
C030034I22Rik	-0.521857	-1.31008	-0.923745	-0.336285	2.62384	-0.198393	-0.153722	-0.79977	-0.534527	0.907513	1.96121	0.155236	0.441049	-0.0672086	1.12938	0.0674852	-0.128233	-0.669645	-0.516473	-1.12578
C030046I01Rik	-0.502681	-0.834664	-0.865144	-0.542556	-0.476195	-0.611785	-0.441118	-0.155396	-0.460766	-0.14161	1.82554	-0.496814	-0.431292	-0.254079	0.0607098	-0.517866	-0.304112	0.596152	1.55644	2.99724
C030048B08Rik	0.994018	-1.09461	-0.957542	-1.37355	2.29364	0.506028	1.53827	-0.677167	-0.0375157	0.607161	0.280333	0.890608	0.829062	-0.512768	0.0936741	-0.372439	-0.270745	-0.212284	-1.15063	-1.37355
C130022K22Rik	-0.555334	-1.94477	0.224613	1.39482	0.721796	2.01498	1.78074	-0.328276	-0.452058	0.911859	-0.0877107	0.580936	0.311325	-0.253937	-0.595555	-0.438957	-0.411416	-1.06136	-0.789956	-1.02174
C130026I21Rik	-0.452174	-0.452174	-0.452174	4.06931	-0.452174	-0.452174	-0.394795	-0.452174	-0.307225	-0.263199	0.272873	-0.42823	0.582896	-0.0788736	-0.134709	-0.238414	-0.452174	-0.0389617	0.0928215	0.0317285
C130039O16Rik	-0.785751	-1.06852	-1.52977	-0.0635022	0.283615	-0.646435	-0.516001	-0.136513	-0.998158	-0.792172	1.81998	1.35947	1.62772	0.872551	1.09251	0.641212	0.12628	-0.9279	0.649031	-1.00765
C130050O18Rik	-0.755927	-0.774774	-0.473206	-0.774774	0.179548	-0.72279	-0.705733	0.130231	-0.0852453	-0.625266	-0.503119	-0.774774	-0.774774	3.39958	-0.0865786	0.649167	0.771546	0.332556	0.552597	1.04174
C1d	-0.158665	-2.06494	-1.84322	-0.237874	1.10159	1.15504	0.614131	0.416054	1.14823	1.05417	-0.175821	-0.956513	-0.574295	0.465542	-0.0156555	1.23357	0.940506	-0.32549	-0.617354	-1.15901
C1galt1	-0.206705	-0.503402	-0.547651	0.491731	3.82572	0.933771	0.844062	-0.473491	-0.486611	-0.320965	-0.205501	-0.377522	-0.190994	-0.350472	-0.354917	-0.473268	-0.432572	-0.344963	-0.278592	-0.547651
C1galt1c1	-0.535233	-0.587463	-0.558814	-0.142122	-0.305461	-0.377712	-0.258057	-0.386932	-0.111534	-0.429177	-0.136575	-0.494603	-0.453102	1.06723	-0.254582	2.1562	3.22416	-0.448678	-0.504123	-0.463428
C1qa	-0.121771	1.71372	-0.190007	0.847939	-0.455362	-0.411938	-0.424818	-0.424535	-0.422358	-0.398266	-0.321832	-0.267989	-0.399624	3.60053	-0.439431	-0.439069	-0.417611	-0.30049	-0.315233	-0.411857
C1qb	-0.0931645	1.71829	-0.222222	0.296467	-0.424164	-0.413702	-0.371082	-0.362878	-0.389002	-0.377124	-0.326954	-0.38752	-0.330269	3.72895	-0.381814	-0.389181	-0.406179	-0.317258	-0.303159	-0.248038
C1qbp	0.452494	-1.1098	-1.12598	-0.305449	-0.196176	1.81079	-0.566309	-0.371445	1.91188	1.62545	0.127225	0.334118	0.833076	-0.508067	0.2032	0.899083	-0.647096	-1.08878	-1.13561	-1.14261
C1qc	-0.235104	2.44294	-0.345234	0.480814	-0.339096	-0.454208	-0.465256	-0.465256	-0.436032	-0.445614	-0.29474	-0.288544	-0.319177	3.2356	-0.35402	-0.461014	-0.378853	-0.307839	-0.239048	-0.330317
C1qtnf4	0.404052	-0.428054	-0.428054	3.59404	-0.428054	-0.428054	-0.428054	-0.428054	-0.428054	-0.0841031	-0.428054	1.35842	1.1484	-0.428054	-0.428054	-0.428054	-0.428054	-0.428054	-0.428054	-0.428054
C1rl	-0.760412	-0.492511	-0.760412	-0.760412	-0.760412	-0.760412	-0.730709	-0.760412	0.628845	-0.170892	-0.760412	-0.685771	-0.760412	0.513516	-0.614391	1.36436	1.33082	2.08712	1.3851	1.4678
C230052I12Rik	1.11577	-1.02124	-0.251068	-0.0786336	-0.094837	1.01459	3.4256	-0.194714	0.175276	-0.363526	-0.482373	-0.767292	0.432162	-0.725837	0.184491	-0.335208	0.191039	-0.292881	-0.978148	-0.953174
C230081A13Rik	-0.368273	-0.635913	-0.635913	-0.635913	0.228887	-0.394875	0.0218366	0.340706	-0.216514	0.974172	0.382373	3.8256	0.0360566	-0.0998048	-0.083681	-0.415551	-0.506802	-0.583893	-0.596586	-0.635913
C230096C10Rik	-0.152199	-1.79594	-1.69775	0.23563	0.252935	-0.0938036	-0.622018	0.0245947	0.705496	1.49364	1.26835	-0.730297	-0.464607	0.733115	0.442279	0.533352	1.90672	0.198214	-0.930954	-1.30675
C2cd2l	2.56525	-1.65354	-0.126766	-0.313424	0.811327	-0.576193	1.36101	0.566355	-0.535664	-0.56724	-0.331866	-1.06797	-1.04349	-0.416902	-0.189902	0.22638	1.45169	0.200419	-0.881892	0.522417
C2cd3	1.37286	-1.34206	-0.950877	-0.510774	-0.10055	1.39766	2.44588	-0.655347	-0.536416	0.915896	0.107309	-0.0429593	0.421248	-0.0512258	0.875713	-0.391458	-0.0240633	-0.342923	-1.11131	-1.4766
C3	-0.686544	-0.570779	-0.592991	-0.719557	-0.677413	-0.66268	-0.632826	-0.687701	0.380784	-0.619919	-0.651312	-0.665116	-0.644486	1.34005	-0.639768	0.858176	2.11083	2.15018	1.27063	0.340438
C330006A16Rik	1.40862	-0.810871	-1.02368	-1.16006	-0.813344	0.522444	-0.614083	0.234242	1.39	2.09607	1.69619	-0.404537	0.114164	-0.111993	0.303872	0.426869	-0.521311	-0.58909	-0.983436	-1.16006
C330007P06Rik	0.171573	-1.48956	-1.10087	-0.320491	1.57275	1.70941	2.42306	-0.968225	-0.174855	0.112241	0.854304	-0.464482	-0.0485425	-0.288833	0.111073	-0.262676	0.430917	-0.412725	-0.894065	-0.959997
C330018D20Rik	2.47668	-1.19815	2.67549	-0.116316	-0.877144	0.192818	0.550743	-1.02389	-0.470244	0.0263484	0.398099	-0.266901	-0.00205904	-0.390811	0.456536	-0.422791	-0.626908	-0.666826	-0.446567	-0.268105
C330019G07Rik	0.0752563	-1.64577	-1.74163	-2.02731	0.807773	0.538272	1.91752	0.0432558	-0.0802862	0.637254	0.415753	0.0263244	0.576924	-0.443456	0.351215	0.320543	1.46928	-0.0323853	-0.98488	-0.223645
C330027C09Rik	0.908347	-0.678676	-0.356784	-0.64199	-0.56682	0.532478	3.23179	-0.468498	-0.138078	-0.431159	-0.61098	-0.610821	-0.689328	-0.667336	0.817796	-0.038653	1.5184	0.286603	-0.671675	-0.724621
C3ar1	-0.265331	-0.292579	-0.0646406	-0.292579	-0.292579	-0.292579	-0.224749	4.11339	-0.292579	-0.284487	-0.292579	-0.292579	-0.292579	0.821931	-0.292579	-0.292579	-0.292579	-0.292579	-0.292579	-0.292579
C530008M17Rik	4.06435	-0.343644	0.807511	-0.343644	-0.343644	-0.343644	-0.343644	0.105642	-0.311418	0.264422	-0.343644	-0.343644	-0.343644	-0.296741	-0.166391	-0.343644	-0.343644	-0.343644	-0.343644	-0.343644
C5ar1	-0.39133	-0.34159	-0.345303	-0.39148	-0.395618	-0.419356	-0.382386	-0.101877	-0.336461	-0.394821	-0.314332	-0.311899	-0.089408	-0.194318	-0.415542	-0.366261	-0.374522	0.236166	1.49285	3.83749
C630004H02Rik	-0.358875	-0.358875	-0.358875	3.96766	0.0828032	-0.358875	-0.358875	-0.268893	-0.343053	-0.251659	0.242222	1.14877	-0.358875	-0.358875	-0.271357	-0.358875	-0.358875	-0.358875	-0.358875	-0.358875
C80913	-0.646815	-1.31777	-1.26527	0.194621	2.04471	1.46577	0.426209	1.40318	0.416715	1.03149	0.475384	0.11137	0.0645422	-0.272833	0.27121	-0.00821343	-0.807	-0.877754	-1.30153	-1.40801
C87436	-0.634371	-1.89651	0.161048	0.0714241	1.42586	0.480715	1.18646	0.0838277	-0.486147	0.72068	0.571033	-0.0182949	2.10262	-0.0888814	0.561852	-0.0842481	-0.195491	-0.968511	-1.46774	-1.52533
Cab39	-0.980792	-2.11272	-2.32492	-0.443422	1.41923	0.299756	-0.0560033	-0.517758	-0.0245477	0.614603	0.385321	1.57944	0.137016	0.887403	0.27754	0.0803382	0.0762547	0.497632	0.942921	-0.737279
Cab39l	0.799005	-2.07557	-1.43566	1.41454	-0.407762	0.846075	0.806157	1.52429	0.333669	-0.290563	-0.544001	-0.0345846	0.377825	-0.213349	0.652706	0.321361	0.594459	0.29636	-1.27155	-1.69339
Cabin1	1.33306	-0.863853	1.40429	-0.452652	2.38973	0.148248	0.423906	-0.653906	-0.728356	0.777712	-0.281727	0.224369	-0.237303	0.455763	0.409392	0.0672329	-0.0939388	-1.49211	-1.3168	-1.51305
Cables1	-0.39912	-0.428842	-0.428842	-0.428842	-0.428842	-0.135211	-0.428842	3.86779	1.28205	0.365052	-0.107776	0.0505692	-0.428842	-0.345649	-0.428842	-0.333301	-0.428842	0.0440183	-0.428842	-0.428842
Cables2	-0.565517	-1.31252	-1.19927	-0.669381	1.49767	0.919824	0.506539	-0.529906	-0.48793	0.209813	0.236387	-0.220934	2.87886	-0.388136	-0.878558	-0.098181	-0.848596	-0.27832	0.235803	0.992348
Cachd1	1.68152	-0.20766	3.80544	-0.323897	-0.323897	-0.323897	-0.323897	-0.323897	-0.29149	-0.280466	-0.242029	-0.323897	-0.323897	-0.323897	-0.323897	-0.289924	-0.298079	-0.314441	-0.323897	-0.323897
Cacna1e	-0.317029	-0.467443	-0.355485	3.00729	1.19862	-0.269022	-0.317457	-0.467443	-0.452093	-0.467443	2.39468	-0.467443	-0.0151224	-0.442125	-0.319103	-0.454111	-0.467443	-0.40657	-0.447816	-0.467443
Cacna1h	-0.199461	-0.276866	-0.276866	4.14329	0.716703	-0.276866	-0.276866	-0.276866	-0.230683	-0.276866	-0.276866	-0.276866	-0.276866	-0.276866	-0.276866	-0.276866	-0.276866	-0.276866	-0.276866	-0.276866
Cacna1i	-0.298357	-0.0866594	-0.298357	-0.298357	0.327805	-0.235266	0.0175424	-0.298357	-0.298357	-0.249535	-0.298357	-0.298357	4.1978	-0.215383	-0.298357	-0.298357	-0.176024	-0.298357	-0.298357	-0.298357
Cacna1s	-0.234933	-0.234933	-0.234933	4.24676	-0.234933	-0.213136	-0.234933	-0.234933	-0.215127	-0.234933	-0.199479	-0.234933	-0.107983	-0.234933	-0.22854	-0.234933	-0.234933	-0.230123	-0.233174	-0.234933
Cacna2d1	-0.302533	-0.302533	-0.302533	0.112064	4.19937	0.165574	-0.0342282	-0.302533	-0.302533	0.0104594	-0.302533	-0.302533	-0.302533	-0.276937	-0.302533	-0.302533	-0.302533	-0.272984	-0.272922	-0.302533
Cacybp	0.47484	-1.29389	-1.2702	-0.72672	0.250201	1.97386	1.04968	-0.330348	1.64337	1.13196	-0.478193	-0.483308	-0.285882	-0.28138	0.0237208	1.22293	0.51497	-0.753311	-1.09754	-1.28477
Cad	0.458071	-0.698635	-1.01664	2.13017	-0.0896867	2.05679	-0.983733	1.2939	0.64595	0.826049	-0.79573	0.139462	0.396115	-0.750614	-0.466927	0.285953	-0.549426	-0.980943	-0.883477	-1.01664
Cadm1	-0.411722	0.0815094	-0.411722	-0.0923022	-0.0302021	-0.411722	-0.411722	-0.411722	-0.411722	-0.411722	3.19159	-0.411722	-0.335056	-0.260601	2.55988	-0.174162	-0.411722	-0.411722	-0.411722	-0.411722
Calcoco1	-0.402732	-0.299076	0.331955	0.65749	0.912043	-0.00192799	-0.305676	-0.192819	-0.698773	-0.0197826	3.69886	0.0789292	-0.417012	-0.397872	0.542378	-0.62139	-0.747701	-0.733479	-0.707853	-0.675558
Calcrl	-1.15556	0.582326	-0.78148	-1.2671	2.47011	0.209075	-0.756401	-0.935616	-0.598508	1.93183	0.149177	-0.151726	-0.987306	0.208784	0.681629	-0.520858	-0.698171	0.449001	0.940735	0.230056
Calhm2	-0.892556	-0.744287	-0.868962	0.416354	-0.729535	-0.716718	-0.500136	-0.426345	-0.555182	0.268829	2.03168	-0.613606	1.2704	1.24246	1.82049	0.603441	1.06554	-0.820594	-0.919716	-0.931563
Calm1	-1.31042	-1.7449	-1.72701	0.684614	-0.369017	1.08235	2.05595	-0.506719	-0.780174	-0.583569	0.220558	-0.0980571	0.578799	0.393939	1.11846	0.846579	1.09429	-0.227378	-0.275204	-0.453094
Calm2	-0.346665	-1.07436	-1.08336	-0.738895	0.281651	0.506631	3.32327	1.29833	0.0356602	-0.0386409	-0.0573802	-0.309683	-0.501169	-0.579452	0.154221	-0.302163	0.909611	0.116495	-0.90799	-0.68611
Calm3	0.559619	-1.66525	-0.565767	-0.916897	0.473841	1.13012	2.27391	1.21316	0.383437	-0.227579	-0.574605	-1.13161	-1.0276	-0.772217	0.480926	0.353959	1.1266	0.485839	-0.851679	-0.748207
Calr	-0.383329	-0.817836	-0.637558	2.85676	-0.0819274	-0.241686	-0.539439	1.34658	2.10193	0.393392	-0.0311655	-0.429408	-0.288955	-0.389386	0.0981318	0.122173	-0.562449	-0.819932	-0.811346	-0.884548
Calu	-0.722259	-0.98554	-1.11001	3.35097	0.605884	-0.0617344	0.620798	0.763819	0.530172	0.585389	-0.286919	0.0210688	-0.740805	-0.092622	-0.375782	0.236911	0.0499191	-0.322176	-1.00003	-1.06705
Camk1	-0.659986	-0.55325	-0.602702	-0.407333	-0.672352	-0.644814	-0.643528	3.23759	-0.106892	0.88456	-0.647562	-0.482678	-0.57737	1.61271	-0.544787	0.424895	0.696606	-0.570524	-0.23433	0.491745
Camk1d	-0.735458	-0.691659	-0.830819	-0.331545	-0.15094	-0.561873	-0.549982	-0.639971	-0.799896	0.13146	0.861669	0.0957144	0.320914	1.93487	2.92637	-0.284468	1.03988	-0.768301	-0.697206	-0.268762
Camk2b	-0.349604	-0.363256	-0.363256	0.059849	4.13812	0.0226456	0.337323	-0.259817	-0.330384	-0.363256	-0.303342	0.348194	-0.187473	-0.318719	-0.363256	-0.340174	-0.323869	-0.334549	-0.341924	-0.363256
Camk2d	-0.589355	-0.510479	-0.577812	-0.183072	2.84881	1.30967	2.21844	-0.578863	-0.559168	-0.339746	-0.447026	-0.341742	0.834804	-0.240735	-0.418149	-0.403463	-0.26489	-0.570758	-0.60242	-0.584051
Camk2g	-1.06684	-1.27556	-1.35716	-0.870364	0.635106	0.290395	-0.803525	2.3911	-0.0843317	1.73576	0.167548	1.31218	-0.802265	-0.464616	0.700882	-0.409616	-0.528103	-0.143566	0.414245	0.158728
Camk2n1	-0.406671	-0.406671	-0.406671	0.531254	-0.406671	-0.253352	-0.406671	0.199791	-0.406671	-0.406671	-0.262472	3.55606	1.89811	-0.406671	-0.406671	-0.406671	-0.406671	-0.406671	-0.382673	-0.406671
Camk4	-0.310403	-0.310403	-0.310403	-0.310403	0.057056	-0.258924	-0.310403	-0.0126879	-0.263523	-0.238781	-0.138678	4.20865	-0.310403	-0.310403	0.132532	-0.0979676	-0.310403	-0.283647	-0.310403	-0.310403
Camkk2	-0.431778	-0.808217	-0.690201	-0.835426	-0.616988	-0.272015	-0.609337	-0.335228	-0.0268241	0.161682	-0.513451	-0.662834	-0.133649	2.88794	0.700372	1.79247	1.63876	-0.25394	-0.409426	-0.581922
Caml	-0.551753	-1.44418	-1.48627	1.40613	0.394733	0.624643	-0.402026	1.15567	1.0735	1.01185	1.74107	0.0410909	-0.846841	0.048913	0.536814	0.48324	-0.476595	-0.919765	-1.18155	-1.20867
Camp	-0.396908	-0.275882	-0.3771	-0.372013	-0.403673	-0.387984	-0.402413	-0.400285	0.0726743	-0.38299	-0.362564	-0.388266	-0.277462	-0.336127	-0.395607	-0.403792	-0.403554	3.18318	2.56716	0.143606
Camsap1	0.316455	-1.46271	-0.356744	-0.0364822	-0.15926	-0.266553	-0.652708	-0.529824	-0.63489	2.36615	-0.0228656	0.628423	2.83558	-0.0566156	-0.0337328	-0.14279	-0.502124	-1.0149	-0.289489	0.0150908
Camsap2	3.61422	-0.712906	-0.538749	-0.712906	-0.712906	-0.0559404	0.106595	-0.712906	-0.633166	-0.115313	0.762939	-0.291687	0.488146	0.351082	0.921232	0.137218	0.0608758	-0.571464	-0.671455	-0.712906
Camta1	0.789263	-1.48103	-0.948397	0.96792	0.672377	0.505221	2.08008	0.179422	0.804213	1.35391	-0.218849	-0.930474	-0.593925	-0.559474	0.29883	0.271993	0.0577946	-0.0768642	-1.49023	-1.68179
Camta2	-1.06115	-1.26975	-1.27064	-0.263034	-0.533015	-0.722361	-0.70344	-0.951011	-0.6181	-0.104606	0.540001	0.335287	1.89313	1.80123	1.36053	0.185836	1.24484	-0.816833	0.167662	0.785441
Cand1	-0.666876	-1.65099	-1.64922	0.462245	1.83123	1.60252	1.20299	0.479589	0.299251	0.985282	0.643609	0.245071	-0.0880008	-0.369133	-0.373186	0.332394	-0.325198	-0.531395	-1.09721	-1.33298
Cant1	-0.746404	-1.74482	-1.82772	0.882594	0.908487	-0.672382	0.418525	1.89641	0.504017	0.781928	0.835179	-0.636063	0.895383	0.152612	0.345661	0.550281	0.249233	-0.479624	-1.00285	-1.31046
Canx	0.386377	-1.56521	-1.49484	1.16152	0.0731013	0.455876	-0.229592	0.205045	1.67063	1.04015	0.770283	-0.756331	-0.532883	0.235959	0.851518	1.34768	0.0291587	-0.94393	-1.20912	-1.49539
Cap1	-1.5185	-1.37296	-1.64686	-1.00412	0.48105	0.108494	0.864504	1.07226	-0.573723	-0.664911	-0.170745	-0.245153	-0.176362	0.773672	-0.00193951	0.476535	0.35682	-0.112386	0.821158	2.53317
Capg	-0.98521	-0.930805	-1.02755	0.569228	-0.797241	-0.818875	-0.856976	-0.292555	-0.802343	-0.450529	0.0594661	-0.848533	1.02358	1.67885	-0.428195	1.46992	1.61942	-0.568047	0.98856	1.39784
Capn1	1.28963	-1.35377	-0.827683	-0.955332	0.318852	-1.14228	-1.40638	0.980579	-0.467133	-0.550097	0.292234	1.18777	-0.315954	0.00295805	-0.295852	-0.224463	-0.292905	0.16102	1.2001	2.39871
Capn2	-0.784586	-0.727263	-0.811084	0.236248	-0.525406	-0.449328	-0.527086	-0.0860554	-0.753353	-0.19493	0.0294401	0.102482	-0.184083	1.9036	1.0966	1.37577	2.67087	-0.795472	-0.796394	-0.779968
Capn5	0.81856	-0.691707	0.437434	3.31839	-0.401075	-0.138285	-0.099711	-0.0765123	-0.663877	0.454634	1.51614	-0.691707	-0.0769353	-0.691707	0.424048	-0.691707	-0.691707	-0.670866	-0.691707	-0.691707
Capn7	-0.159444	-1.68826	-1.40384	0.654885	2.01947	0.833461	2.19778	0.212305	0.273001	-0.1761	0.561201	-0.468288	0.291278	-0.572486	0.269025	0.0433666	0.0384491	-0.730342	-1.14755	-1.04791
Capns1	-0.981365	-1.73071	-1.72816	-0.817967	1.16883	-0.884674	-0.68963	0.584067	0.223258	-0.244168	0.202324	-0.191437	-0.626271	1.25979	0.603255	1.26443	1.77774	1.04507	-0.192804	-0.0415757
Caprin1	0.407108	-1.69039	-1.49852	-0.241047	0.250553	1.53397	0.742658	-0.510188	1.14786	1.37534	0.557481	-0.187376	-0.469361	-0.371898	1.37731	0.633019	0.15132	-0.372805	-1.25386	-1.58117
Capsl	-0.371355	-0.404864	-0.35397	-0.404864	3.31941	0.800258	2.22361	-0.404864	-0.369844	-0.297284	-0.298824	-0.378281	-0.272256	-0.404864	-0.404864	-0.389996	-0.381014	-0.396403	-0.404864	-0.404864
Capza1	-1.22789	-1.76999	-1.77376	-0.536414	0.340022	0.106981	0.752631	-0.446974	-0.29239	-0.47586	-0.237014	-0.0284982	-0.277332	0.442911	0.110579	0.243635	0.633346	0.528652	1.24507	2.66229
Capza2	-1.3123	-1.51748	-1.56631	-0.682073	0.913716	0.213267	0.637442	0.141208	-0.186644	0.038763	-0.0592911	-0.878198	-0.512269	1.73564	1.06956	1.32483	1.8127	-0.380976	-0.497132	-0.294467
Capzb	-1.62245	-1.82828	-1.97974	-0.700071	-0.0632586	0.247034	0.607636	-0.00907107	0.00802608	-0.196298	0.623719	-0.123102	-0.0599668	1.43743	0.988533	1.12485	1.84155	-0.156668	-0.0866244	-0.0532481
Car1	4.16387	-0.2195	-0.202095	-0.260721	-0.284402	-0.272894	-0.284402	-0.277826	-0.263483	0.619015	-0.270314	-0.275683	-0.273791	-0.272313	-0.257429	-0.27865	-0.276927	-0.279134	-0.277552	-0.255766
Car2	2.46011	0.830304	3.13372	-0.390501	-0.360733	-0.356029	-0.367607	-0.373832	-0.387971	-0.289966	-0.385478	-0.377148	-0.392022	-0.393678	-0.382096	-0.394153	-0.39382	-0.390615	-0.395099	-0.393385
Car3	-0.369643	-0.507032	-0.507032	0.154792	3.61671	1.0221	0.653383	-0.368517	0.150447	1.08539	-0.507032	-0.507032	-0.507032	-0.469247	-0.507032	-0.436556	-0.507032	-0.475573	-0.507032	-0.507032
Card11	-0.337696	-0.479484	-0.406318	0.625947	-0.220345	-0.178028	-0.387511	-0.385544	-0.479484	-0.350615	3.78822	0.061002	1.32244	-0.417732	0.153152	-0.442379	-0.466765	-0.454893	-0.464481	-0.479484
Card6	-0.708945	-0.790073	-0.790073	0.194353	-0.790073	0.168535	-0.154865	-0.790073	-0.720045	-0.361301	2.99679	0.592703	2.00462	-0.150366	0.92458	-0.677579	-0.387099	-0.642857	0.103277	-0.021516
Card9	-0.878034	-0.741081	-0.9337	-0.9337	0.879288	-0.880663	-0.9337	-0.285609	1.90093	-0.515336	-0.795475	-0.9337	-0.72348	1.51321	0.37746	1.51471	1.30778	0.996954	0.249094	-0.184944
Carhsp1	2.6899	0.712018	2.73702	-0.577332	-0.460524	-0.0171915	0.535089	-0.26831	-0.63009	-0.638936	-0.475807	-0.679076	-0.421765	-0.563111	-0.330839	-0.590002	-0.539314	-0.297544	-0.193328	0.00914088
Carkd	-0.822513	-1.74063	-1.67415	-0.183172	0.897109	0.546873	0.834361	0.36318	1.55132	0.876163	0.610884	-0.88084	-1.28288	0.596257	0.922604	0.898106	0.680415	-0.167224	-1.01395	-1.01192
Carm1	3.17994	-0.999003	0.2742	0.633002	-0.628312	1.07196	0.107969	-0.949744	-0.0139077	0.832472	-0.269136	0.376756	-0.664055	-0.440906	0.267547	0.258503	0.0780569	-0.935438	-0.995028	-1.18488
Carns1	-0.678943	-0.730658	-0.730658	0.622245	3.68782	-0.0101907	0.0403259	-0.146607	-0.550738	0.0890858	0.0646372	-0.216397	0.0891231	-0.463413	-0.509322	-0.606999	-0.55438	-0.389875	-0.306818	1.30176
Cars	2.83853	-0.437127	-0.309901	2.25565	-1.11377	0.23432	0.673405	-0.954945	-0.00689217	0.451658	-0.463159	-0.452262	0.0899615	-0.603269	-0.0989331	-0.216778	-0.121345	0.114581	-0.765943	-1.11377
Cars2	0.29202	-1.41577	-1.71104	0.687191	-0.836003	0.240176	0.642784	-0.318948	0.557552	1.99033	0.451859	0.217617	-0.0687789	0.134955	-0.522674	0.69566	1.77147	-0.065753	-1.24575	-1.49691
Casc3	0.742314	-1.75812	-1.32567	-0.90608	-0.947482	0.610116	1.00263	0.295063	-0.636723	1.14539	1.31224	0.162925	1.50909	0.786622	0.982262	-0.207824	0.182363	-0.996959	-0.736697	-1.21547
Casc4	-0.570808	-0.815911	-0.815911	2.09941	1.7229	1.3814	0.944401	-0.321411	-0.609055	1.37374	-0.0675117	0.487705	-0.630623	-0.754529	0.598796	-0.7926	-0.815911	-0.782262	-0.815911	-0.815911
Casc5	2.64763	-0.791619	-0.34144	-0.693169	-0.592162	0.197971	2.20118	0.0101873	-0.197374	-0.198565	-0.714569	-0.679221	-0.702729	-0.777906	0.912366	-0.0727422	1.13591	0.211389	-0.779543	-0.775587
Casd1	-1.16829	-1.40033	-1.45825	-1.45825	2.18577	0.175053	-0.137147	0.321153	0.671759	1.90241	0.580721	-0.617886	-0.748817	0.802945	0.233828	0.0980128	-0.546968	0.24335	0.0556224	0.26531
Cask	-0.844914	-0.910595	-0.910595	-0.540098	-0.910595	-0.773463	-0.417841	0.923626	0.162815	-0.429037	-0.461035	-0.910595	-0.628302	1.49604	0.186283	1.09811	2.1756	-0.257123	-0.0368612	1.98858
Casp1	-1.32193	-1.16937	-1.26347	-0.251901	1.86782	-0.423353	-0.957729	-0.746746	0.22977	0.191265	0.0730547	-0.543875	0.124722	2.3617	0.651205	1.02341	0.601636	-0.809885	-0.339341	0.703011
Casp2	1.00045	-1.55815	-0.309998	-0.949915	0.891556	1.75877	1.29872	-0.227428	-0.0803643	1.95009	0.087802	-0.828218	-0.265669	-0.289362	0.868395	0.151765	-0.345847	-0.844122	-1.2414	-1.06708
Casp3	0.0737161	-1.14649	-0.883855	-0.0975751	-0.175617	0.470723	0.182887	3.71403	-0.848267	0.440274	-0.362257	-0.760096	-0.558285	0.16121	0.159909	-0.339835	0.11894	-0.592778	-0.128051	0.571419
Casp4	-0.700528	-0.726204	-0.752554	0.184025	3.73746	-0.203798	-0.472147	-0.681505	-0.0553333	-0.270703	-0.560175	-0.573326	0.00505855	1.18671	-0.403479	-0.239255	0.0471798	-0.20661	0.173329	0.511847
Casp6	0.128374	-1.24632	-1.31251	0.762229	1.94926	0.302967	-0.0734315	-0.49508	-0.833136	0.511872	1.37955	-0.153613	0.341931	0.508373	1.72933	0.384824	-0.194898	-1.16116	-1.21605	-1.31251
Casp7	-0.559776	-1.10498	-1.26296	-0.838196	0.368559	1.30877	1.3038	1.46579	1.75103	0.236185	-0.712521	-0.655143	-0.89405	-0.476576	1.04418	0.369693	-0.784289	1.03855	-0.492366	-1.1057
Casp8	-1.19323	-1.48752	-1.64173	-0.696719	1.89002	0.497574	0.970733	0.0913949	0.19517	0.800997	0.173984	0.198621	-0.161627	0.562878	0.834604	0.847167	1.15151	-0.436623	-1.20801	-1.38919
Casp8ap2	1.8861	-1.42185	-1.32995	-0.418264	-0.888138	2.01808	1.24656	-0.294568	0.459691	0.996395	-0.329197	-0.0973595	0.0194956	-0.616532	0.407803	0.808021	0.00454594	-0.272394	-1.03252	-1.14592
Cast	1.90565	-1.32734	1.54847	-1.09938	-0.541066	-1.11603	-0.781804	1.49231	-1.18361	-0.717019	-0.057814	0.149304	-0.689454	0.860353	0.396823	0.363201	1.42497	-0.287999	-0.229059	-0.110503
Casz1	-1.22663	-0.810177	-1.22663	-1.22663	0.506094	0.0567963	0.301287	2.31413	0.696993	-0.244384	-0.182017	-1.07618	0.0634779	-0.133326	-1.13471	-0.245244	-0.0586861	0.689759	1.80608	1.13002
Cat	-0.263783	2.66113	2.46852	-0.466382	1.58988	-0.110837	-0.0692667	-0.389552	-0.553033	-0.208772	-0.169562	-0.549346	-0.292784	-0.331931	-0.32684	-0.427626	-0.477282	-0.660047	-0.725704	-0.696779
Cav2	-0.423196	-0.386207	-0.423196	-0.423196	4.10122	-0.0315867	0.399648	-0.349194	-0.400366	-0.354436	-0.105703	-0.358288	-0.334465	0.0753896	-0.167373	0.365705	0.0443942	-0.415338	-0.390616	-0.423196
Cbfa2t2	-0.282615	-1.24205	-1.40642	0.359368	2.76058	1.38196	1.61607	0.190676	-0.122201	0.57182	0.178256	0.228461	-0.636854	-0.409367	-0.331399	-0.201346	-0.778443	-0.323661	-0.662849	-0.889988
Cbfa2t3	-0.667249	-0.90031	-0.497091	-0.131914	0.914104	-0.186445	0.0448802	0.43327	-0.702208	1.48335	1.39135	-0.965988	-0.201059	0.0251422	2.78819	-0.201585	0.321632	-0.982352	-1.00516	-0.96056
Cbfb	-1.30086	-1.25081	-1.33183	-1.13316	0.0544001	1.00927	1.86819	1.32299	-0.00979041	0.403921	-0.475722	0.0215595	-0.454594	-0.376479	1.47495	0.479492	1.34346	0.0599728	-0.946552	-0.758411
Cbl	-1.39361	-1.61836	-1.47908	-1.19164	-0.535421	-0.428677	-0.3095	-1.07047	-0.0902881	-0.0744279	1.66977	0.896794	0.202955	1.19668	1.30553	0.648451	1.15954	0.050828	0.579698	0.481224
Cblb	-0.56889	-0.903818	-0.757808	-0.992419	-0.00834955	0.260455	1.0744	-0.294381	-0.618702	-0.0208293	0.773544	2.73164	1.75186	-0.083309	0.933573	-0.173016	-0.439982	-0.801686	-0.940802	-0.921476
Cbll1	-0.466031	-1.13403	-1.31091	1.26877	1.65581	1.16418	2.46035	-0.036796	-0.443799	0.517943	0.451898	-0.273731	-0.128892	-0.24979	-0.0155193	-0.525344	-0.0382484	-0.701629	-1.00717	-1.18706
Cbr1	1.49743	-0.423017	0.555928	0.287964	2.50066	0.389415	-0.215592	0.0790699	-0.0786074	0.772189	0.756282	1.18889	-0.454658	-0.673296	-0.876737	-0.817641	-1.09031	-1.11193	-1.08914	-1.1969
Cbr4	-0.866145	-1.5785	-1.5785	0.181355	0.873224	1.82224	-0.482136	0.738636	0.494093	2.05578	-0.42175	-0.208942	0.00107062	0.241984	0.532956	0.925563	-0.213629	-0.378246	-1.02057	-1.11848
Cbwd1	0.93014	-1.42246	-0.581035	1.20891	1.03648	1.28713	2.47826	-1.29331	-0.0668043	-0.414638	-0.0276841	0.0964278	0.567193	-0.706646	0.109156	-0.328776	-0.0988356	-0.81429	-1.1334	-0.825814
Cbx1	0.0803531	-0.933684	-0.765715	-0.619479	0.616338	2.01894	3.0492	-0.0015171	-0.277128	0.747238	-0.354234	-0.458941	-0.0520052	-0.651428	0.294504	-0.205335	-0.163691	-0.602116	-0.854484	-0.866817
Cbx3	1.24372	-1.23217	-0.898791	-0.550251	-0.304809	1.73848	2.5896	0.352058	0.35254	0.559488	-0.623272	-0.486451	-0.300884	-0.915178	0.109973	0.0869989	0.492318	0.07521	-1.11153	-1.17705
Cbx4	-1.20987	-1.22673	-1.25326	2.99085	1.6519	0.243055	0.971312	-0.111335	-0.0994102	-0.196586	0.58733	0.397312	-0.485292	-0.393356	0.0689354	-0.385795	-0.28252	-0.27085	-0.615676	-0.38001
Cbx5	2.51463	-0.899987	-0.697697	-0.852193	-0.354929	1.13158	2.30647	-0.314942	0.120794	0.691321	-0.323002	-0.676311	-0.390457	-0.865126	0.318901	0.104295	0.214575	-0.197382	-0.918888	-0.911657
Cbx6	0.951107	-1.06777	-0.866789	1.03231	-0.039963	1.45339	1.67577	-0.248032	-0.4985	1.60877	1.57658	-0.281572	-0.459365	-0.817214	0.172779	-0.517029	-0.530391	-1.0329	-1.04341	-1.06777
Cbx7	-0.374925	-0.527521	-0.783937	1.80666	-0.111006	-0.40282	0.663326	-0.290947	-0.695492	-0.447629	0.629756	1.73957	2.72383	-0.434432	-0.188437	-0.632061	-0.457449	-0.758863	-0.783937	-0.673689
Cby1	-0.0612417	-1.03626	-1.28468	-1.24033	1.13631	1.73333	2.25204	-0.122997	0.493357	0.432662	-0.291906	-0.770416	-0.779828	-0.663774	0.14861	0.172807	1.48762	-0.368155	-0.735433	-0.501731
Cc2d1a	-0.83383	-1.19173	-1.36032	-0.397111	2.54304	-0.367344	-0.178728	0.904716	-0.342375	0.382549	1.83819	-0.0717493	-0.122934	-0.494099	1.01648	-0.580943	0.733353	0.237942	-0.656239	-1.05887
Cc2d1b	-1.1899	-1.68113	-1.48189	-0.0206667	0.289999	1.01799	0.727418	0.271233	-0.422387	0.769438	1.21688	1.54318	1.10889	-0.223095	0.478967	0.639848	0.290801	-0.595904	-1.15197	-1.5877
Ccar1	0.737587	-1.61199	-0.676234	0.416511	1.2321	1.40729	2.40692	0.000689446	-0.0487409	0.896287	-0.209507	-0.613625	-0.616116	-0.447214	-0.00686229	0.0272234	0.470004	-0.823173	-1.24704	-1.29411
Ccdc101	-0.306414	-1.36008	-1.71936	-0.257623	-0.445236	0.482443	0.273441	0.709646	1.29025	1.24416	0.243689	0.212053	-0.063627	-0.205475	0.920704	1.17941	1.34099	-0.197017	-1.64884	-1.69312
Ccdc104	0.732667	-1.26664	-0.566622	-1.05678	2.49521	0.819822	1.88559	-0.347312	-0.292237	1.00583	0.56909	-0.206672	-0.399188	-0.508472	0.388347	-0.306769	-0.206793	-0.907512	-0.618605	-1.21295
Ccdc107	-0.679034	-1.13046	-1.08131	2.24945	2.00176	1.04134	0.410882	0.577728	0.0481329	0.596375	1.02515	-0.356434	-0.616473	-0.555457	0.0496845	-0.316458	-0.269609	-0.82905	-1.03696	-1.12926
Ccdc109a	-0.444386	-0.944031	-0.944031	-0.271926	-0.512243	-0.626412	-0.468666	2.04591	1.81747	0.130818	-0.744378	-0.488503	-0.346244	-0.330217	-0.558037	-0.489245	-0.594321	1.97861	1.64438	0.14545
Ccdc109b	-0.45543	-0.477249	-0.492753	-0.31314	-0.433796	-0.47705	-0.46267	-0.492753	-0.473836	-0.396604	-0.427945	-0.457175	-0.492753	2.64828	0.663073	1.52818	2.42527	-0.470807	-0.472833	-0.468008
Ccdc111	2.39525	-1.10422	-1.5277	-0.659536	0.799295	1.23753	1.37114	0.11886	-1.07728	0.457623	0.187526	-0.787789	0.390801	-0.287726	0.587041	-0.214149	0.112267	-1.45578	-0.645074	0.101926
Ccdc115	-1.18245	-1.63906	-1.71777	0.0902871	0.208095	0.252707	0.42071	0.748344	1.84988	0.712036	0.0581077	-0.0913543	-0.34818	0.583985	0.576865	1.31414	0.927548	-0.0866432	-1.02417	-1.65307
Ccdc117	-0.309924	-1.0771	-0.941442	3.68707	0.316572	0.429965	0.352543	0.0409119	0.046765	0.209971	0.273621	0.0300171	-0.405955	-0.292999	-0.403105	0.368285	0.164909	-0.600068	-0.882685	-1.00735
Ccdc12	-1.26396	-1.62958	-1.53842	-1.07464	0.0364868	-0.567411	-0.410118	1.04238	-0.505769	0.133055	0.541755	-0.428694	-0.180646	1.50039	1.34453	0.992618	1.39097	-0.62488	0.0196633	1.22227
Ccdc122	-0.540018	-0.725317	-0.725317	0.0488144	0.199122	-0.667718	-0.570014	-0.725317	1.27422	2.79664	1.96185	-0.725317	0.146457	-0.3359	0.980896	-0.103222	-0.510985	-0.371434	-0.68213	-0.725317
Ccdc123	1.89489	-0.847377	1.34778	-0.973815	-0.0516711	1.06498	2.53652	-0.0381132	-0.297206	-0.202602	-0.660212	-0.703268	0.237224	-0.955349	0.469349	-0.381984	-0.0525861	-0.599748	-0.908972	-0.877836
Ccdc124	0.155142	-1.96432	-1.89511	-0.117145	0.636099	1.80342	1.79295	-0.238926	0.240518	-0.352676	0.246539	-0.621539	0.0564481	0.0129443	0.636151	0.55878	1.21341	-0.39455	-1.03018	-0.737957
Ccdc125	-0.9918	-0.725534	-0.995867	-0.995867	0.37172	-0.376949	-0.610893	-0.563738	1.3168	-0.513581	-0.820066	-0.0550047	-0.422807	0.660609	-0.946966	0.00343531	0.16494	1.53742	1.75638	2.20777
Ccdc126	-0.913333	-0.45492	-0.645843	-0.122909	-0.913333	-0.641418	-0.6501	-0.766575	0.58008	-0.0683891	-0.316008	0.665668	0.08886	-0.526289	-0.0752057	-0.141281	-0.532452	0.791603	1.22716	3.41469
Ccdc127	0.714927	-1.46634	-1.26093	2.79579	0.0781357	-0.171128	0.405053	-0.463366	0.394192	0.725206	1.21262	-0.0594104	-0.285759	-0.301422	0.562909	0.106372	0.254835	-0.724627	-1.03009	-1.48697
Ccdc130	-0.690412	-1.6365	-1.42921	0.846648	-0.0540729	0.112117	1.52702	-0.331714	-0.517214	-0.141783	2.42305	0.0550371	0.297319	-0.00243689	-0.256111	-0.0402271	1.72989	-0.348886	-0.830607	-0.711914
Ccdc134	-0.681473	-0.731919	-0.784026	3.58342	0.0138321	0.651124	1.04006	0.252118	-0.221784	0.147402	0.269329	-0.552041	0.380865	-0.411967	-0.0434098	-0.184253	-0.197058	-0.805817	-0.88518	-0.839227
Ccdc135	-0.392376	-0.392376	-0.243783	-0.392376	3.94387	0.866777	0.333314	-0.392376	-0.345383	0.663493	-0.392376	-0.271851	-0.392376	-0.392376	-0.300746	-0.3608	-0.392376	-0.392376	-0.361131	-0.392376
Ccdc15	0.205536	-1.00728	-1.0475	1.23105	0.347192	2.1629	2.10087	-0.25954	-0.191929	-0.0267566	-0.634931	-0.291048	1.074	-0.996124	0.0440715	-0.100921	0.35947	-0.543163	-1.19318	-1.2327
Ccdc162	-0.243447	-0.243447	-0.243447	-0.243447	-0.243447	-0.207373	-0.243447	-0.243447	-0.243447	-0.227257	4.24584	-0.174454	-0.102473	-0.243447	-0.18431	-0.224474	-0.243447	-0.204144	-0.243447	-0.243447
Ccdc163	-0.746125	-1.4322	-1.00722	-0.382133	0.591597	-0.327943	1.45628	0.516485	0.303173	1.88615	-0.112405	0.0205013	-0.01962	-0.0368543	0.886088	0.476489	1.63296	-0.676921	-1.51191	-1.51638
Ccdc18	0.517474	-0.761549	-0.262244	-0.761549	0.907954	0.489014	3.54281	-0.479078	-0.108723	-0.19883	-0.761549	-0.696022	-0.385721	-0.714906	0.654619	-0.198395	0.622787	0.0262569	-0.739661	-0.692692
Ccdc21	2.02627	-1.0912	0.464223	1.85095	0.793578	0.415915	0.163399	-0.128632	-0.298329	0.118133	-0.840051	1.03145	-0.63778	-1.02005	1.25412	-0.691164	-0.155698	-0.646868	-1.27728	-1.33099
Ccdc22	-0.0654021	-1.23093	-1.36896	-1.00961	0.0779026	0.256062	0.816559	2.07272	1.61215	0.473225	-0.481517	-0.986303	-0.824651	0.539141	0.395141	1.06599	0.956584	-0.14343	-1.02828	-1.1264
Ccdc23	3.20293	-0.884117	0.454716	-0.728251	1.39634	0.0595218	-0.397283	0.152704	-0.27544	-0.0709288	1.40244	-0.0061603	-0.211199	-0.00202204	-0.355495	-0.621788	-0.70284	-0.740908	-0.692013	-0.980206
Ccdc25	1.77258	-1.32229	-0.888658	0.630847	-0.0326948	0.780655	2.74562	-0.668656	-0.111164	-0.0758435	-0.132741	-0.69084	-0.655309	-0.346611	0.0519198	-0.1577	1.08553	0.0425576	-1.03234	-0.994863
Ccdc28a	0.355031	-1.06941	-0.237198	-0.0933361	2.68431	-0.754297	-0.504444	2.41365	-0.407972	0.587962	0.574938	0.549269	-0.302166	-0.517669	-0.167818	-0.514245	-0.62198	-1.08928	-0.59935	-0.285995
Ccdc28b	-1.11687	-1.23265	-1.3575	1.65645	1.78063	-0.447678	-0.263758	-0.469289	0.376919	0.165757	-0.0537005	-1.33184	1.3708	0.688859	0.709379	0.290976	1.27179	-0.472663	-0.657405	-0.908213
Ccdc32	0.94095	-1.44988	-0.562831	-0.760515	1.70316	1.78639	1.66311	-0.545256	-0.23691	0.183965	0.670008	-0.0223297	-0.226461	0.0683078	0.657911	-0.234905	0.128863	-1.0391	-1.17378	-1.5507
Ccdc34	2.45875	-0.85117	-0.46795	-0.804094	-0.56325	0.598601	2.24675	-0.291292	0.179876	0.0359229	-0.72717	-0.723794	-0.813566	-0.787629	0.225772	0.184079	1.09371	0.693052	-0.798788	-0.887812
Ccdc41	0.00203056	-1.23811	-1.3026	-0.474432	0.62191	0.652718	3.09736	-0.256562	0.239561	0.345279	-0.396228	-0.809112	-0.784587	-0.259324	0.6956	0.277246	1.17628	0.111064	-0.890313	-0.807794
Ccdc43	-0.456388	-1.33676	-1.46866	-0.749732	1.63452	0.785933	1.0042	0.220606	0.402381	1.59841	0.744387	0.15812	-0.39271	-0.256876	1.04047	0.922104	-0.357613	-0.731094	-1.29263	-1.46866
Ccdc45	1.47465	-1.32483	0.371843	-1.57892	1.06566	0.669265	2.64516	0.317826	-0.824559	0.477783	0.228344	0.12084	-0.259137	-0.648706	0.186227	-0.269831	-0.759969	-0.107362	-0.94779	-0.836507
Ccdc47	-0.10017	-1.74513	-1.4974	2.12209	1.9273	-0.0589671	1.05079	0.588265	-0.348188	0.600476	1.01363	-0.132178	-0.0802885	-0.379341	0.0424588	-0.253606	-0.196419	-0.996737	-0.629732	-0.926844
Ccdc50	-1.01601	-1.14003	-1.09571	-0.695022	0.436397	-0.106898	-0.479378	-0.453981	-0.234793	0.322516	1.15082	-0.399336	1.64143	1.33587	1.25557	0.863713	1.66475	-0.886561	-1.03198	-1.13137
Ccdc51	0.938799	-1.11484	-1.30456	0.235686	2.2207	-0.44885	1.9598	-0.0926753	0.0954486	-0.329627	-0.284515	-0.709733	0.917911	-0.765579	0.116111	0.377771	0.931501	-0.370101	-1.06868	-1.30456
Ccdc53	-1.20558	-1.81981	-2.00573	-0.311419	1.01598	-0.298679	0.836199	-0.226429	0.45291	0.597627	1.15231	0.763874	-0.527633	0.780906	0.37595	0.577903	1.74529	-0.363929	-0.62497	-0.914777
Ccdc55	-0.798616	-2.36382	-1.64024	2.39146	0.315033	-0.105724	1.18372	0.704558	-0.379259	0.845085	0.188642	0.2493	0.612539	0.12893	0.131453	-0.409996	0.0615582	-0.689327	-0.569529	0.144228
Ccdc56	-0.292438	-2.20724	-2.0317	-0.793779	0.270528	0.537068	1.17841	0.256331	1.83116	0.0632127	0.653187	-0.548955	0.464161	-0.0752946	0.37786	0.700324	0.929266	0.179574	-0.2355	-1.25618
Ccdc58	-0.20813	-1.14154	-1.41506	0.293634	1.30232	1.56699	0.966315	-0.421654	1.14048	1.79559	-0.00448801	-0.442371	0.579941	-0.176925	-0.0420603	0.405899	-0.37606	-1.1561	-1.25173	-1.41506
Ccdc59	-0.768923	-1.75514	-1.58569	0.306621	1.43387	1.49653	0.642901	0.575799	-0.474789	0.607478	0.884719	0.451195	1.10166	0.10889	0.351717	0.487885	-0.23163	-1.01506	-1.29743	-1.32061
Ccdc6	3.35194	-1.35619	-0.66087	0.440176	-0.508026	1.16385	0.108364	-0.25215	0.449239	0.561953	0.33825	-0.271087	-0.491736	-0.262315	0.506473	-0.144592	-0.741166	-0.72333	-0.980815	-0.527963
Ccdc61	-0.725876	-0.975199	-1.07169	0.373608	0.97935	0.0340348	3.53267	0.473064	-0.194964	0.31726	0.0676354	-0.00303869	-0.510759	-0.618428	-0.0288354	-0.343852	0.568538	-0.287711	-0.816299	-0.769514
Ccdc66	0.0860797	-0.861689	-0.947735	-0.309619	3.27965	0.791544	1.08367	-0.347061	-0.153624	0.460869	-0.020461	0.0424235	1.13824	-0.46018	-0.18298	-0.587554	-0.401167	-0.751018	-0.91166	-0.947735
Ccdc69	-0.967683	-1.03267	-1.03267	-0.141194	0.0714668	0.930055	3.21005	-0.242006	-0.356128	0.108709	0.336613	-0.018323	0.66494	-0.475017	1.00905	-0.0264608	0.591628	-0.647052	-0.950627	-1.03267
Ccdc71	-0.705911	-1.91873	-1.01746	-0.064795	2.06989	1.01234	1.02068	1.39179	0.00911588	0.347684	0.0828643	0.449869	0.75975	0.318505	-0.105852	-0.32344	0.225934	-1.01833	-1.08048	-1.45342
Ccdc72	-0.0903261	-2.58509	-1.83945	0.627672	-0.0180009	0.872772	-0.00600259	0.963358	1.46721	-0.110052	0.107397	0.356414	-0.39323	0.335038	0.218918	1.38124	0.659038	-0.0394074	-0.780165	-1.12734
Ccdc75	-0.966067	-2.4184	-0.797789	0.630348	0.780802	1.34766	2.06991	-0.563143	-0.703767	-1.01449	0.925523	0.16484	0.149853	-0.259286	-0.479556	1.11497	0.271315	-0.114329	-0.280651	0.142256
Ccdc77	1.80815	-0.622492	3.04879	-0.813178	-0.0372667	0.018508	1.05909	0.423299	-0.214112	0.217347	-0.857219	-0.487012	-0.548463	-0.687227	0.0615811	-0.457354	0.372276	-0.449764	-0.851968	-0.982986
Ccdc82	0.484083	-1.82519	-1.81465	-0.28385	0.513962	-0.0120242	1.73969	1.53101	-0.131591	-0.247112	-0.514217	0.710758	0.64111	-1.11459	0.532942	0.207186	0.840936	0.825864	-0.90738	-1.17694
Ccdc84	-0.102664	-1.06542	-0.134274	-0.388475	3.63274	0.22312	1.56961	0.0765394	-0.21159	-0.18362	0.0814522	-0.725179	-0.190602	-0.216421	0.057803	-0.394463	-0.283366	-0.646433	-0.464669	-0.634083
Ccdc85b	-0.879647	-1.26947	-1.26066	0.0150512	0.0725522	-0.129428	-0.881179	0.664434	0.0189216	1.17918	0.968272	1.39384	-0.157461	1.36767	1.38631	0.908432	0.371354	-1.23525	-1.26689	-1.26604
Ccdc86	-0.367183	-1.19162	-0.93165	-1.21832	1.09291	1.26101	0.305748	-1.28449	0.982246	1.49213	-0.11421	0.219639	-0.540763	1.02011	1.23227	1.23593	-0.372135	-0.889509	-0.70421	-1.22789
Ccdc88a	-0.588727	-0.934883	-0.908426	1.21113	-0.149777	-0.388533	-0.0600503	-0.290232	-0.631025	0.115846	0.843025	-0.925838	-0.73925	0.891109	2.09429	0.636682	2.25275	-0.586394	-0.919726	-0.921963
Ccdc88b	-1.05428	-0.703023	-1.01666	-0.843135	-0.740089	-0.896555	-1.11944	0.484351	0.09223	-0.352495	0.791183	0.609465	0.0287067	0.160635	-0.199946	-0.219356	-0.6123	1.14756	2.18268	2.26047
Ccdc88c	-0.00402742	-1.89631	-0.571339	1.21207	-0.520515	-0.62453	-0.0787319	0.283314	-1.19689	-0.904151	-0.470064	1.88881	1.52834	1.07041	-0.357537	0.202818	1.42934	-0.695045	-0.6966	0.400624
Ccdc9	-0.757182	-1.61836	-1.55919	0.749755	1.23327	1.31329	1.46667	-0.64487	-0.906486	0.99099	0.248538	-0.107302	0.714745	0.641288	0.967156	0.125796	0.171865	-0.68561	-1.12915	-1.21522
Ccdc90a	-0.460685	-1.84755	-1.50134	-1.61571	0.400559	-0.402481	-1.16289	1.20032	0.164053	0.615553	0.128769	-0.737355	0.888946	1.58995	1.16664	0.697851	0.933444	-0.302975	0.48908	-0.244183
Ccdc90b	-0.269091	-0.857135	-0.84611	-0.172037	3.48238	0.241345	-0.546398	-0.347422	0.417797	1.4016	0.501153	-0.031042	-0.27037	0.0277117	-0.059629	0.134918	-0.192275	-0.807163	-0.776061	-1.03218
Ccdc91	-1.11471	-1.11979	-1.30152	-0.433467	-0.10061	0.635265	0.871753	-0.766749	0.770624	3.00804	0.472416	0.11089	0.440409	0.137599	0.175634	0.104744	-0.000879828	0.361992	-0.950135	-1.30152
Ccdc97	-0.0798305	-1.7001	-0.864623	0.80079	0.710531	0.204809	0.887845	-0.585769	-0.0114929	0.612671	2.65746	-0.175727	-0.546262	0.464458	1.02978	-0.71589	0.385323	-1.07859	-0.699282	-1.2961
Ccdc99	1.08351	-0.645796	-0.484458	-0.513627	-0.672513	0.377677	3.45423	-0.0668747	-0.257692	-0.316372	-0.600515	-0.457393	-0.320808	-0.649456	0.421638	-0.226013	1.40317	-0.20253	-0.653665	-0.672513
Cchcr1	1.6312	-0.847009	-0.605456	-0.847009	0.829233	0.798511	3.02571	-0.629785	-0.186238	0.248422	-0.511557	-0.327646	-0.847009	-0.747831	-0.0211859	-0.182414	0.270425	0.631079	-0.834434	-0.847009
Ccl17	-0.209716	-0.264702	-0.264702	-0.264702	-0.264702	-0.264702	-0.264702	4.21998	-0.264702	0.138711	-0.264702	0.0862608	-0.264702	-0.264702	-0.264702	-0.264702	-0.264702	-0.264702	-0.264702	-0.264702
Ccl2	-0.390631	-0.349651	-0.384145	-0.3341	-0.225105	-0.353632	-0.368163	-0.166216	-0.395948	-0.404038	-0.43286	-0.43286	-0.43286	3.77553	-0.167212	1.28226	0.933147	-0.396553	-0.420924	-0.336048
Ccl3	-0.272843	-0.256835	-0.265746	-0.268079	-0.258589	-0.271667	-0.270187	4.2379	-0.2355	-0.228191	-0.247334	-0.203485	-0.268873	-0.0121139	-0.234831	-0.0593239	-0.152854	-0.261064	-0.245973	-0.224417
Ccl4	-0.255774	-0.261343	-0.272066	-0.25824	-0.261188	-0.265305	-0.268515	4.24091	-0.260281	-0.131671	-0.0761024	-0.116727	-0.247359	-0.135423	-0.188079	-0.248688	-0.221608	-0.265349	-0.261808	-0.245387
Ccl5	-0.22492	-0.217796	-0.2244	-0.214254	-0.228097	-0.227796	-0.228202	-0.231337	-0.229429	-0.228245	-0.185343	4.24832	-0.226381	-0.22171	-0.226967	-0.227514	-0.230747	-0.226896	-0.224494	-0.223792
Ccl6	-0.549522	-0.452232	-0.478338	-0.47612	-0.563812	-0.534513	-0.525481	2.56	-0.540444	-0.549805	-0.493095	-0.508315	-0.263004	1.80463	0.0718529	-0.10277	0.210029	-0.524699	-0.458683	2.37432
Ccl9	-0.48819	-0.469722	-0.486818	-0.478125	-0.502198	-0.501286	-0.48137	3.26734	-0.15105	-0.271588	-0.494808	-0.500411	-0.5005	2.09903	0.457277	0.418121	0.556581	-0.488008	-0.501853	-0.482422
Ccm2	-0.67248	-1.3187	-1.16485	-0.613951	2.48998	1.10242	2.23962	-0.160667	-0.653892	-0.474474	0.0858136	0.377934	0.9202	-0.171017	-0.358965	-0.436985	-0.252102	-0.507947	-0.535307	0.105371
Ccna2	2.11244	-0.559765	-0.342244	-0.617754	-0.617186	0.522993	2.95195	-0.282048	-0.252612	-0.478337	-0.648485	-0.596154	-0.628023	-0.653991	0.127539	-0.159983	1.2103	0.205789	-0.644012	-0.650423
Ccnb1	1.86023	-0.577934	-0.252709	-0.512027	-0.569064	0.591369	3.2529	-0.298489	-0.186123	-0.43206	-0.60993	-0.637513	-0.605059	-0.640103	0.218381	-0.204852	0.930661	-0.0626926	-0.62468	-0.640303
Ccnb2	2.47129	-0.735806	0.613596	-0.747595	-0.584713	0.410688	2.51371	-0.0347172	-0.288184	-0.476748	-0.75152	-0.745202	-0.751643	-0.721364	0.271595	0.148013	0.952544	-0.0905864	-0.692782	-0.760575
Ccnc	-0.118677	-1.63207	-0.0018978	-0.201343	1.33434	-0.545448	1.02145	-0.728801	-0.291077	0.178087	-1.40444	-0.287201	-0.407018	0.595677	2.32459	0.432425	1.73103	-0.669078	-0.758343	-0.572201
Ccnd1	-0.277298	-0.324025	-0.307469	-0.302236	-0.324025	-0.321453	-0.312309	-0.324025	-0.257682	0.118459	4.03669	-0.324025	-0.324025	-0.273367	1.04545	-0.291221	-0.314195	-0.286565	-0.312653	-0.324025
Ccnd2	-0.643026	-0.615326	-0.670104	2.42928	0.360537	0.247137	-0.445644	-0.361778	-0.175333	1.05893	-0.337207	2.67897	0.617369	-0.637683	-0.380033	-0.552466	-0.631738	-0.641659	-0.668286	-0.631944
Ccnd3	1.22139	-1.23055	-1.02711	-1.13041	-0.342682	2.45688	1.93772	-0.19725	-0.543647	-0.588943	-0.951806	-0.513049	-0.829758	-0.353565	0.615537	-0.0850127	0.271836	0.63138	0.410019	0.249024
Ccndbp1	0.393055	3.68458	1.63152	-0.11454	-0.115606	-0.5593	-0.405698	-0.101287	-0.615309	-0.422152	-0.393269	-0.404706	-0.36001	-0.247538	-0.37967	-0.558199	-0.434546	-0.584206	-0.150219	0.137106
Ccne1	3.96145	-0.514616	-0.521336	0.452523	-0.491893	0.425151	0.250858	-0.267626	-0.195014	-0.365012	-0.534885	-0.473162	-0.311206	-0.556609	-0.0121539	0.436819	-0.212087	0.0914769	-0.574359	-0.588321
Ccne2	3.37535	-0.660478	-0.660478	-0.497112	-0.660478	1.33841	0.517339	-0.00550197	0.293464	-0.116897	-0.641148	-0.620766	-0.612352	-0.644957	-0.0986373	0.487685	-0.51874	0.992542	-0.645526	-0.621717
Ccnf	2.11446	-0.622544	-0.597895	-0.65384	-0.699212	0.287569	2.5123	-0.333581	-0.225746	-0.374598	-0.666955	-0.642474	-0.699212	-0.678675	0.545615	-0.12502	1.64034	0.617895	-0.699212	-0.699212
Ccng1	-1.24312	-1.90973	-1.9843	1.59797	-0.245286	0.192136	0.0402867	-0.378242	-0.168335	0.525816	0.765536	1.70447	0.917022	0.610942	1.14865	-0.0820441	-0.207649	-0.737129	-0.308281	-0.238711
Ccng2	-1.00568	-0.906576	-0.69289	-0.611126	-0.0977752	0.220513	3.21152	1.16313	-0.727191	-0.385366	-0.497076	-0.720127	-0.262948	-0.454093	0.017552	-0.496676	1.36132	0.0635029	-0.053418	0.873417
Ccnh	-0.0441274	-1.37625	-1.39074	0.0260184	0.584891	1.90935	1.83034	-0.00964067	1.6913	0.741053	-0.681636	-0.139732	-0.269028	-0.847232	-0.0987111	0.637594	0.0274304	-0.294773	-1.08792	-1.20819
Ccni	-0.616589	-2.15758	-0.638558	-1.1942	-0.301345	0.837253	2.28241	0.0773779	-0.59293	0.206207	1.08289	-0.720842	0.749765	-0.300608	1.46191	-0.418145	0.618902	-0.426939	-0.477511	0.52853
Ccnk	0.938567	-1.35866	-0.785705	-0.0632436	0.126144	0.937904	2.26934	-1.16495	-0.585476	0.641067	-0.20467	-0.552618	0.939562	0.509439	0.882636	-0.186913	1.08849	-0.921287	-1.1869	-1.32272
Ccnl1	-0.517011	-1.9712	-1.90362	-0.75362	0.884688	0.178425	0.678355	-0.636996	-0.537669	1.10148	1.40211	-0.442142	0.382989	1.25642	1.44504	0.19732	0.777534	-0.602374	-0.627804	-0.311919
Ccnl2	1.25829	-2.32906	-0.595935	0.287956	0.943517	0.654835	1.01578	0.360867	-0.348495	0.375088	0.38678	-0.1193	1.75124	0.0612642	0.488181	-0.405043	0.101048	-1.38593	-1.01034	-1.49074
Ccno	-0.516591	-0.412153	-0.403805	-0.358037	-0.526517	-0.484811	-0.33191	-0.414782	0.206942	-0.512128	-0.383189	-0.430413	-0.410634	-0.313997	-0.41103	-0.398596	-0.491903	1.38156	2.09993	3.11206
Ccnt1	0.513467	-1.61455	-1.09378	0.548642	2.28354	1.94842	0.631834	-0.554708	-0.862625	0.0641778	0.737702	0.67846	0.304508	-0.415997	0.0859535	-0.0590038	-0.315491	-1.0319	-1.00128	-0.847375
Ccny	0.0760006	-1.75514	-1.76992	0.711141	-0.360701	-0.00154033	0.777104	2.33335	0.00383186	0.628246	0.92447	0.626543	-0.598259	0.453636	0.350466	0.675369	-0.119439	-0.47843	-1.20639	-1.27033
Ccpg1	-0.728491	-0.673058	-0.683589	1.59126	-0.465092	-0.579345	-0.772533	0.850214	-0.425067	-0.534703	0.235445	-0.411329	-0.18272	0.510992	-0.292124	-0.459902	-0.556532	-0.368282	0.624023	3.32084
Ccr1	-0.499076	-0.41845	-0.446171	-0.523072	-0.523072	-0.479291	-0.467477	1.89587	-0.484729	-0.492925	-0.453795	-0.431976	0.243103	-0.0475722	-0.411617	-0.198559	-0.0714196	-0.266984	0.579486	3.49773
Ccr10	-0.251409	-0.251409	-0.251409	4.24503	-0.251409	-0.251409	-0.251409	-0.251409	-0.155646	-0.237919	-0.133296	-0.251409	-0.251409	-0.228453	-0.178904	-0.216718	-0.224195	-0.131339	-0.224468	-0.251409
Ccr2	-0.543217	-0.547461	-0.559924	-0.462864	-0.543924	-0.557403	-0.5494	0.123694	-0.478354	-0.378932	-0.206362	-0.240042	-0.562039	3.05176	1.38864	0.918253	1.78507	-0.539817	-0.559155	-0.538516
Ccr3	-0.168229	0.16461	0.248618	-0.324608	-0.324608	-0.324608	-0.324608	4.18585	-0.298259	-0.324608	-0.324608	-0.119374	-0.324608	-0.324608	-0.324608	-0.324608	-0.324608	-0.254815	-0.184928	-0.00278618
Ccr5	-0.27015	-0.346996	-0.346996	-0.12534	-0.346996	-0.346996	-0.323483	-0.346996	-0.332582	-0.315	4.09383	0.766636	-0.280392	-0.10189	0.21243	-0.237574	-0.323551	-0.333962	-0.346996	-0.346996
Ccr7	-0.50348	-0.37058	-0.51106	-0.203656	-0.111914	0.454751	0.890762	-0.454697	-0.486077	-0.226141	-0.241069	1.03131	3.78211	-0.471907	-0.27808	-0.480009	-0.352977	-0.486596	-0.469626	-0.51106
Ccr9	-0.21033	-0.246931	-0.271419	-0.253838	-0.271419	-0.262669	-0.251217	-0.271419	-0.269404	-0.22016	4.22306	-0.0624126	-0.256216	-0.265835	0.197747	-0.270425	-0.271419	-0.239499	-0.267766	-0.258426
Ccrl2	0.559107	-0.638386	2.15578	2.05178	-0.372344	-0.64638	-0.703933	-0.538642	-0.40959	-0.299534	-0.688133	-0.216388	-0.555047	2.41139	-0.0657608	-0.12416	-0.0595623	-0.579003	-0.623525	-0.657671
Ccrn4l	2.26906	-1.01107	-0.229683	-1.29779	-1.01219	0.233343	0.0815355	-0.190359	1.22439	-0.64416	-0.913521	-0.716462	-1.00279	-0.245132	-0.208374	0.287882	-0.260327	1.80203	1.4268	0.406807
Ccs	1.08335	-0.890318	-0.446495	0.0284559	1.09786	-0.67324	-0.828736	0.576008	0.0590174	1.16661	2.10661	0.363575	-0.723796	1.37463	-0.0774355	0.114357	-0.193611	-1.21981	-1.39004	-1.52699
Cct2	-0.256763	-1.56213	-1.50896	-0.378929	1.09193	1.76665	1.48294	0.346069	0.697735	1.08654	0.0512809	-0.146518	-0.154175	0.0553981	0.630815	0.669014	-0.104171	-0.972158	-1.30653	-1.48803
Cct3	0.114003	-1.28036	-1.21857	0.0584269	1.87342	1.73602	0.561625	-0.246354	0.873659	1.62897	-0.0969202	0.142307	0.42944	-0.715839	-0.0050417	0.334749	-0.576527	-1.08696	-1.25653	-1.26951
Cct4	-0.0623559	-1.59368	-1.48086	-0.703334	1.68251	1.27695	0.705401	-0.0367846	0.646202	1.10478	0.0114787	-0.0338843	0.0254363	0.395466	0.843441	0.848814	0.36521	-1.05095	-1.40475	-1.53909
Cct5	-0.111645	-1.65515	-1.4387	-0.0470569	1.20777	1.07355	0.639248	-0.568623	0.623067	1.20332	1.04073	-0.00680468	0.187632	0.15596	0.874415	0.674143	0.482562	-1.16054	-1.4911	-1.68277
Cct6a	0.190352	-1.4091	-1.40933	0.146273	0.146476	1.68574	-0.104418	-0.288875	1.10248	2.25897	0.0888121	-0.219661	0.56219	-0.354912	0.0889538	0.984997	-0.0245524	-0.766589	-1.18919	-1.48861
Cct7	0.501	-1.27583	-1.39372	0.0231926	1.42047	1.20626	1.25414	-0.350797	1.00408	0.88184	-0.311232	0.210705	-0.600776	-0.314715	0.655225	0.734045	0.587699	-0.93828	-1.69962	-1.59369
Cct8	0.357018	-1.56231	-1.18822	-0.495246	0.510775	1.89287	1.22363	-0.380682	1.26587	0.977952	-0.290105	-0.131115	-0.0498662	-0.0908106	0.508804	1.03722	0.305621	-1.01603	-1.32976	-1.54562
Ccz1	-0.0910651	-2.17268	-0.986929	0.11671	1.01317	0.989909	1.73264	0.964409	0.728226	0.0389552	0.530789	-1.03333	-0.110867	0.146719	0.0811692	0.802279	0.731352	-0.791307	-1.33864	-1.35152
Cd14	-0.463812	-0.245904	-0.614882	-0.503594	-0.614882	-0.586429	-0.587271	-0.614882	0.196034	-0.554911	-0.570094	-0.556817	-0.457714	3.41564	-0.496777	1.52749	0.528885	-0.0213724	0.307102	0.914184
Cd151	0.163927	-1.02313	-0.830779	0.642167	0.274181	-0.72294	-0.501394	-0.245954	0.0060126	3.28232	-0.100893	-0.709616	-0.581072	1.06748	0.507866	0.255475	0.848955	-0.549727	-0.56427	-1.21861
Cd160	-0.238814	-0.238814	-0.238814	-0.238814	-0.101812	-0.238814	-0.238814	-0.238814	-0.221547	-0.225379	-0.226602	4.2462	-0.168511	-0.238814	-0.238814	-0.238814	-0.238814	-0.224617	-0.211961	-0.238814
Cd163	-0.268114	0.717889	-0.498273	-0.498273	-0.498273	-0.498273	-0.498273	-0.498273	-0.469678	1.7584	0.887609	-0.498273	-0.498273	-0.168186	3.38618	-0.0792941	-0.498273	-0.283799	-0.498273	-0.498273
Cd164	-0.717285	-1.07069	-0.924582	0.382813	-0.0706663	-0.212126	-0.29435	-0.189442	-0.462267	-0.0978871	3.80995	0.200474	-0.189894	-0.666234	0.763236	-0.21682	-0.235388	-0.30848	0.225949	0.27369
Cd177	-0.484	-0.371406	-0.455955	-0.478776	-0.468715	-0.481831	-0.503926	-0.474157	-0.395947	-0.467293	-0.433575	-0.449703	-0.268872	0.0506671	-0.459036	-0.411245	-0.318236	2.02203	2.63591	2.21407
Cd180	-0.555882	-0.570783	-0.570783	-0.133377	-0.570783	-0.293107	-0.570783	-0.570783	-0.514807	0.0160781	2.22945	-0.570783	3.04806	0.886364	0.449127	-0.263321	0.268467	-0.570783	-0.570783	-0.570783
Cd19	-0.442099	-0.377304	-0.455281	-0.289488	3.17149	1.05762	0.952415	-0.47159	-0.474244	-0.470445	-0.456201	-0.426309	1.92902	-0.451363	-0.452988	-0.466406	-0.454622	-0.4656	-0.475266	-0.481341
Cd1d1	-0.554657	-0.5013	-0.555816	-0.0173996	3.94819	0.552754	0.755987	-0.0779313	-0.179782	0.208537	-0.348207	-0.23719	0.0292454	-0.459664	-0.421333	-0.25494	-0.26715	-0.47986	-0.540772	-0.598712
Cd2	-0.446958	-0.377585	-0.444072	0.62104	-0.326472	0.194383	0.29907	-0.396461	-0.439576	-0.441964	-0.398306	3.63821	1.59585	-0.429374	-0.440979	-0.445161	-0.432283	-0.433636	-0.438281	-0.457448
Cd200	-0.347905	-0.367072	-0.367072	0.42286	-0.182842	-0.352787	-0.310139	-0.367072	-0.351476	-0.308079	4.08288	-0.171859	0.62223	-0.340444	0.0860109	-0.305956	-0.367072	-0.340064	-0.367072	-0.367072
Cd200r1	-0.496984	-0.475843	-0.496984	-0.360482	-0.496984	-0.486775	-0.4708	4.04049	-0.281113	-0.153163	0.605766	-0.0633479	-0.496984	-0.115153	0.371585	-0.223878	-0.321625	-0.2708	0.0724595	0.120615
Cd200r3	-0.22046	-0.220625	-0.225518	-0.2031	-0.225518	-0.225518	-0.225518	4.24847	-0.225518	-0.225518	-0.222763	-0.225518	-0.225518	-0.2246	-0.225518	-0.225518	-0.225518	-0.225194	-0.225518	-0.225518
Cd200r4	-0.353977	-0.353977	-0.353977	-0.353977	-0.353977	-0.353977	-0.353977	3.97558	-0.353977	-0.353977	-0.251008	1.19352	-0.353977	0.0798282	-0.353977	-0.132563	-0.0192123	-0.311893	-0.286525	-0.353977
Cd209a	-0.339107	-0.325429	-0.344144	-0.287186	-0.344144	-0.333718	-0.339863	-0.344144	-0.344144	-0.138277	1.11238	-0.344144	-0.344144	-0.126667	4.00931	-0.256225	0.0954768	-0.334309	-0.340354	-0.331169
Cd209d	-0.269612	-0.264282	-0.251911	-0.279276	-0.279276	-0.275487	-0.279276	-0.279276	-0.274334	-0.262149	4.16026	-0.279276	-0.247413	-0.249885	0.638951	-0.218635	-0.271565	-0.263568	-0.27471	-0.279276
Cd22	-0.389224	-0.279924	-0.379984	-0.276962	-0.185479	0.891755	0.0876779	-0.32086	-0.425919	-0.13393	-0.139199	-0.270369	4.04667	-0.330667	0.11742	-0.401446	-0.3679	-0.448271	-0.451965	-0.341424
Cd226	-0.348054	-0.348054	-0.225547	-0.348054	-0.348054	-0.348054	-0.348054	1.29774	-0.348054	0.143306	-0.348054	3.93509	-0.348054	-0.305803	-0.0169522	-0.329543	-0.348054	-0.321636	-0.348054	-0.348054
Cd244	-0.393527	-0.545322	-0.545322	-0.545322	-0.0422587	-0.464511	-0.457621	3.69762	-0.456736	0.485845	1.04642	0.263621	-0.44939	-0.153189	0.933355	-0.370594	-0.507134	-0.538898	-0.52877	-0.428259
Cd247	-0.250597	-0.250597	-0.250597	-0.250597	-0.00515106	-0.205831	-0.203177	-0.250597	-0.244962	-0.229126	-0.197206	4.24164	-0.250597	-0.250597	-0.162779	-0.250597	-0.250597	-0.250597	-0.236841	-0.250597
Cd24a	2.81251	0.105429	2.48341	-0.536556	-0.0314022	0.668782	0.799875	-0.635453	-0.457709	-0.554741	-0.625838	-0.661383	-0.171071	-0.655413	-0.559673	-0.634726	-0.647418	-0.347937	-0.241109	-0.109571
Cd27	-0.385599	-0.382929	-0.397188	-0.270553	-0.201755	-0.36212	-0.397188	-0.264147	0.0230171	2.22982	-0.231071	3.46739	-0.351625	-0.36614	-0.22062	-0.313657	-0.397188	-0.384072	-0.397188	-0.397188
Cd274	-0.639982	-0.639982	-0.449477	1.60947	-0.35446	-0.50152	-0.639982	3.28471	-0.499872	0.310361	-0.0468502	0.93267	0.886368	-0.0236553	-0.639982	-0.570628	-0.487167	-0.595713	-0.615517	-0.318791
Cd28	-0.409609	-0.409609	-0.409609	2.29361	-0.343812	-0.409609	-0.409609	-0.409609	-0.32161	-0.0677684	0.613117	3.313	-0.305227	-0.396111	-0.362698	-0.377508	-0.398756	-0.37825	-0.40072	-0.409609
Cd2ap	-0.516224	-0.832155	-0.813864	-0.34523	0.1993	-0.155147	0.106412	-0.915075	-0.816004	-0.374315	2.62118	-0.0992604	0.998497	1.28151	1.87175	0.0943361	0.363557	-0.85656	-0.897631	-0.915075
Cd2bp2	-0.301402	-1.3319	-1.43067	2.64997	0.58298	0.94667	1.5624	-0.107956	-0.437583	-0.23328	-0.190998	0.128554	1.1356	-0.632569	0.36923	-0.184808	-0.0715853	-0.491423	-0.82516	-1.13607
Cd300a	-0.754262	-0.688541	-0.787251	-0.568955	-0.746546	-0.706735	-0.756157	0.0664367	-0.27839	-0.219029	0.380096	-0.719945	-0.613973	3.01163	1.40467	0.72433	0.784137	-0.500249	-0.325974	1.29471
Cd300c	-0.24583	-0.281312	-0.281312	-0.281312	-0.281312	-0.277182	-0.281312	-0.281312	-0.271769	-0.0523493	4.1865	-0.281312	-0.252608	-0.281312	0.469004	-0.266285	-0.272908	-0.263894	-0.277619	-0.224564
Cd300lb	-0.589524	-0.443824	-0.591052	-0.549251	-0.55325	-0.630979	-0.597385	0.53871	-0.464885	-0.480478	-0.460085	-0.546869	-0.272081	1.30291	-0.266948	0.436324	0.221599	-0.320622	0.684071	3.58362
Cd300ld	-0.306006	-0.249429	-0.337075	-0.337075	-0.337075	-0.329262	-0.321342	-0.337075	-0.333185	-0.324898	-0.254449	-0.260983	0.0532151	0.38722	-0.276532	-0.279677	-0.288976	-0.20683	0.172283	4.16715
Cd300lf	-0.510254	-0.413603	-0.502394	-0.402933	-0.536171	-0.484335	-0.461258	-0.438557	-0.372817	-0.483238	0.681377	-0.41426	0.185561	-0.185517	-0.387608	-0.413411	-0.423618	0.504802	1.3887	3.66954
Cd300lg	-0.517994	-0.524794	-0.400468	-0.374039	-0.524794	-0.524794	-0.507867	-0.524794	-0.494295	-0.242547	-0.436557	-0.524794	-0.524794	1.4925	2.34825	1.70001	2.14118	-0.509831	-0.524794	-0.524794
Cd302	-0.423506	-0.272399	-0.485171	-0.485171	-0.362581	-0.376936	-0.4753	-0.411526	-0.411021	-0.189778	-0.430296	-0.463947	-0.386389	3.48481	0.250336	1.53113	1.28952	-0.424773	-0.471825	-0.485171
Cd320	-0.468752	-0.897804	-0.771011	1.01438	0.0815327	1.24631	-0.384593	-0.531917	2.27895	2.57783	-0.381182	-0.111164	0.0335602	-0.646817	-0.18124	-0.243235	-0.462711	-0.868103	-0.815115	-0.468922
Cd33	-0.433263	-0.301602	-0.467996	-0.467996	-0.467996	-0.392143	-0.467996	-0.467996	-0.309068	-0.211951	-0.240229	-0.3479	-0.399872	-0.139653	-0.159551	-0.377307	-0.294317	0.500523	1.81825	3.62806
Cd34	-0.339836	-0.267504	-0.322945	-0.3617	-0.3617	-0.357511	-0.331608	-0.0681118	0.823903	4.07313	-0.322443	-0.346003	-0.3617	-0.305219	-0.176502	0.251495	-0.192374	-0.356348	-0.330777	-0.346248
Cd36	0.491742	0.753014	4.05893	-0.161707	-0.188568	-0.268733	-0.300112	-0.363402	-0.358856	-0.345524	-0.28863	-0.363402	-0.257572	-0.303632	-0.329539	-0.353119	-0.351348	-0.349081	-0.357055	-0.363402
Cd37	-0.875514	-0.82205	-0.837817	-0.202857	2.87901	0.768511	0.528975	-0.0507614	-0.333514	-0.446716	0.345337	0.0328962	2.34204	-0.651836	-0.381703	-0.557492	-0.607487	-0.550943	-0.377401	-0.200674
Cd38	-0.576458	-0.4346	-0.541194	0.0280341	0.152759	1.39675	2.55978	-0.501129	-0.596714	-0.491216	0.205661	-0.105542	2.59775	-0.460906	-0.332903	-0.595924	-0.542863	-0.566412	-0.583496	-0.611381
Cd3d	-0.247644	-0.227567	-0.249439	-0.232859	-0.20048	-0.25192	-0.242312	-0.247651	-0.246067	-0.249994	-0.20437	4.24406	-0.200357	-0.24183	-0.256036	-0.249556	-0.24468	-0.239341	-0.14986	-0.062091
Cd3e	-0.228772	-0.206738	-0.231791	-0.231791	-0.231791	-0.231791	-0.218789	-0.231791	-0.228971	-0.217084	-0.17456	4.24809	-0.231791	-0.22659	-0.203386	-0.231791	-0.231791	-0.2297	-0.227386	-0.231791
Cd3eap	-0.281854	-1.13477	-1.13477	-0.436842	-0.718811	0.937296	-0.600121	0.145274	2.24096	2.1817	0.423807	0.873933	-0.380446	-0.109672	0.572238	0.598334	-0.621416	-0.456696	-0.963368	-1.13477
Cd3g	-0.223552	-0.234908	-0.232518	-0.219711	-0.103898	-0.239419	-0.239419	-0.231863	-0.235619	-0.239419	-0.179033	4.24643	-0.214756	-0.234879	-0.239419	-0.237818	-0.239419	-0.235721	-0.225636	-0.239419
Cd4	-0.272603	-0.152033	-0.272603	0.0420631	-0.272603	-0.272603	-0.272603	-0.272603	-0.272603	-0.243183	4.23135	-0.0411105	-0.272603	-0.199188	-0.107762	-0.2675	-0.272603	-0.264	-0.272603	-0.272603
Cd40	-0.645036	-0.47042	-0.574095	0.433796	0.863465	-0.366156	-0.510596	-0.45085	-0.611603	-0.645036	-0.645036	-0.443902	3.30156	1.55888	0.80569	0.0364745	0.16788	-0.572074	-0.587903	-0.645036
Cd44	-1.12133	-1.06452	-1.21752	0.336152	-1.09134	-0.781557	-0.350525	-0.940604	-0.329866	-0.355399	1.35003	-0.238414	-0.3586	1.0249	0.142278	0.471253	0.609249	0.203728	1.02953	2.68256
Cd47	2.32641	-1.09696	2.48589	-0.230298	-0.280184	-0.272596	0.546554	0.296577	-0.329573	0.0297328	1.22719	-0.642328	-0.647457	-0.301753	0.539374	-0.62494	-0.551567	-0.647574	-0.892167	-0.934327
Cd48	-1.098	-1.08179	-1.1035	-0.0376401	0.39038	-0.206934	0.0638688	0.468872	-0.487442	0.0180674	0.375951	-0.11551	-0.023246	0.843515	2.52863	1.36908	1.40243	-1.08123	-1.09603	-1.12948
Cd5	-0.300886	-0.189853	-0.300886	-0.300886	0.267665	-0.181725	-0.300886	-0.300886	-0.28768	-0.300886	0.0676667	4.20291	-0.300886	-0.26451	-0.117709	-0.270961	-0.300886	-0.285564	-0.232262	-0.300886
Cd52	-1.10182	-0.950332	-1.05871	1.53463	-0.903575	-0.878442	-0.997271	-0.53064	-0.796716	-0.877316	-0.39066	0.834261	1.18609	1.01213	0.191488	0.180939	0.198287	0.0480807	1.26007	2.03951
Cd53	-1.45272	-1.28579	-1.42868	0.488684	1.25449	-0.29678	-0.540146	2.41717	-0.917002	-0.73848	0.985654	0.407237	0.56277	0.650238	0.368302	-0.364715	-0.375557	-0.679953	-0.0650288	1.01031
Cd55	0.265968	-0.387329	-0.295225	0.60193	-0.289712	-0.32964	0.00638443	-0.0156566	-0.52364	-0.394668	-0.479343	0.0437624	4.01191	-0.471963	-0.528983	-0.515424	-0.537457	-0.494226	0.0596307	0.273682
Cd59a	2.647	0.611497	2.89842	0.140694	-0.474461	-0.474461	-0.474461	-0.474461	-0.459477	0.416381	-0.474461	-0.474461	-0.340159	-0.431075	-0.474461	-0.414073	-0.440722	-0.461642	-0.441814	-0.40379
Cd59b	3.9364	0.277467	1.22454	-0.361608	-0.00314587	-0.361608	-0.361608	-0.361608	-0.361608	-0.0677129	-0.361608	-0.361608	-0.361608	-0.305035	-0.361608	-0.361608	-0.361608	-0.361608	-0.361608	-0.361608
Cd6	-0.257298	-0.289822	-0.143006	-0.289822	-0.289822	-0.289822	-0.289822	-0.289822	-0.168892	-0.0858986	-0.0513952	4.23345	-0.0932678	-0.251825	-0.127549	-0.289822	-0.289822	-0.289822	-0.289822	-0.156099
Cd63	-0.415122	-0.352378	-0.407289	-0.402376	-0.41704	-0.41025	-0.415387	3.89963	1.15331	-0.142238	-0.407096	-0.410163	-0.364977	-0.370953	-0.419296	-0.394509	-0.418763	0.355668	0.232279	0.106953
Cd68	-0.62518	-0.561473	-0.651353	-0.0751745	-0.651353	-0.610866	-0.595043	-0.633873	-0.482269	-0.50889	2.09932	-0.619954	-0.594626	2.11841	1.37672	1.19844	1.41298	-0.598981	-0.534998	-0.461837
Cd69	-0.671841	-0.574807	-0.63166	-0.259802	3.72292	0.504061	0.188359	1.0102	-0.312389	-0.147559	-0.163266	0.551554	0.287884	-0.531276	-0.013998	-0.514387	-0.631696	-0.570349	-0.567199	-0.674757
Cd7	-0.39888	-0.442476	-0.42962	-0.426456	-0.450963	-0.446763	-0.439356	0.880863	-0.445775	-0.0274802	3.62595	0.901173	-0.423122	-0.444427	1.17979	-0.43848	-0.446931	-0.433168	-0.442915	-0.450963
Cd72	-0.586436	-0.533978	-0.611398	-0.533198	1.9745	1.89417	2.50922	-0.0619738	-0.600025	-0.354891	-0.00441711	-0.282536	1.05302	-0.570261	-0.231936	-0.619586	-0.607577	-0.607166	-0.613739	-0.611788
Cd74	-0.516867	-0.451784	-0.493366	2.13746	-0.520167	-0.427528	-0.432547	-0.510753	-0.517875	-0.497108	0.824235	-0.470097	2.5823	0.0086627	1.84849	-0.506403	-0.497793	-0.512906	-0.523105	-0.522851
Cd79a	-0.5188	-0.470082	-0.509263	0.757936	2.60828	1.12137	0.936543	-0.518894	-0.531651	-0.512662	-0.516481	-0.498975	2.33814	-0.512246	-0.531021	-0.524504	-0.514826	-0.530297	-0.531563	-0.541002
Cd79b	-0.560787	-0.475476	-0.534241	0.383385	2.1005	1.15271	1.5374	-0.517326	-0.510359	-0.49799	-0.419865	-0.503004	2.59044	-0.506781	-0.523951	-0.51177	-0.536854	-0.54752	-0.554724	-0.563789
Cd81	-0.126997	-0.610931	-0.645791	3.61169	1.18075	0.376462	0.671306	-0.399875	0.220712	0.141254	-0.692976	-0.555444	0.171198	-0.558326	-0.686357	-0.650393	-0.69547	0.0636744	-0.194053	-0.620429
Cd82	3.48979	-0.579813	1.47356	-0.0686023	-0.664438	-0.522093	-0.112864	-0.0225917	-0.653641	-0.57291	-0.0832656	1.01175	0.013828	-0.684967	-0.315397	-0.599989	-0.652403	-0.518313	-0.260973	0.323344
Cd83	-0.376342	-0.307513	-0.210467	2.46256	-0.411218	-0.332376	-0.411218	-0.411218	-0.391452	-0.333042	-0.289221	-0.143826	3.29534	0.0522144	-0.330205	-0.35243	-0.381125	-0.325032	-0.392209	-0.411218
Cd84	-0.79444	-0.639391	-0.818157	-0.710065	-0.493542	-0.551009	-0.628366	2.34186	-0.494224	-0.326011	-0.622919	0.726101	0.551101	1.27282	-0.678951	-0.221264	0.0494081	-0.553212	0.0709156	2.51935
Cd86	-0.730899	-0.431205	-0.820844	-0.0960519	-0.206308	-0.820844	-0.656369	-0.820844	-0.723572	-0.513841	1.02675	-0.569579	1.47565	2.28744	1.23602	0.855841	1.56697	-0.768206	-0.820844	-0.469264
Cd8a	-0.291871	-0.295909	-0.295909	-0.295909	-0.295909	-0.295909	-0.295909	-0.295909	-0.291502	-0.26896	0.961656	4.07839	-0.295909	-0.295909	-0.119921	-0.281844	-0.295909	-0.292821	-0.295909	-0.238131
Cd8b1	-0.27897	-0.30251	-0.30251	-0.227829	-0.269985	-0.30251	-0.272071	-0.30251	-0.301069	-0.295427	1.17874	4.0133	-0.30251	-0.299485	-0.289505	-0.299138	-0.271998	-0.297264	-0.297369	-0.279387
Cd9	-0.671767	-0.567593	-0.651739	-0.355552	-0.242266	-0.554569	-0.631581	2.43816	-0.238958	0.181533	-0.614645	-0.434898	-0.314604	-0.569128	-0.284258	-0.559388	-0.636619	0.894902	1.19355	2.61942
Cd93	-0.845801	-0.79668	-0.864283	0.130783	2.71819	1.5425	1.13345	-0.711689	0.300662	1.44945	-0.672483	-0.668786	-0.446404	-0.0673312	-0.0423053	0.476832	-0.452573	-0.760006	-0.77254	-0.650974
Cd96	-0.28628	-0.28628	-0.28628	-0.28628	-0.120771	-0.28628	-0.28628	-0.28628	-0.251707	0.369195	-0.21583	4.20121	-0.154997	-0.28628	-0.146787	-0.28628	-0.28628	-0.28628	-0.244942	-0.28628
Cd97	-1.28315	-1.30142	-1.35607	0.670287	1.93199	0.566721	1.26324	-0.0518802	-0.991742	-0.973148	-0.468704	1.13054	0.825917	1.45812	0.0478392	0.044048	0.417851	-0.726161	-0.76263	-0.441646
Cd99l2	2.70569	-0.222938	0.531241	2.02177	-0.193727	-0.347654	-0.728248	-0.0213996	-0.403567	0.505296	-0.907365	-0.575083	-0.907365	1.20344	-0.576612	0.376862	0.127507	-0.858742	-0.821741	-0.907365
Cdadc1	-0.17807	-1.68746	-1.53062	-0.464724	1.73483	-0.220578	-0.477245	0.965922	1.8196	0.58916	-0.400932	-1.05456	-1.34539	-0.324351	0.181087	0.33142	0.760663	0.656641	1.07616	-0.431546
Cdan1	1.67476	-1.15321	-0.688555	-0.633361	-0.93008	0.892991	1.60015	0.42987	-0.0955562	0.860267	-0.960825	-0.192262	-0.532052	-0.623375	0.77231	0.0403096	1.94571	-0.0439485	-1.07381	-1.28934
Cdc123	1.1676	-1.86972	-1.08324	0.943465	-0.0157065	0.634562	1.1165	-0.815983	0.865362	0.623219	0.0147472	-0.520871	-0.998992	-0.543971	0.718742	1.22449	1.33728	-0.278708	-1.31078	-1.20799
Cdc14a	-0.991199	-0.972998	-0.919958	-1.06543	1.81209	0.0396349	-0.993595	0.253721	0.134061	1.55314	-0.785221	-0.337696	-0.635059	-0.0409409	0.17726	-0.397173	-0.419057	-0.0412887	1.47369	2.15603
Cdc14b	-0.447472	-0.26815	-0.487759	0.713216	-0.487759	-0.337131	-0.487759	-0.487759	-0.433347	0.0191506	3.98134	0.484255	-0.320591	0.261179	-0.149649	-0.107086	-0.0230996	-0.446059	-0.487759	-0.487759
Cdc16	-0.208299	-1.44711	-1.40644	1.22067	1.48198	1.13252	1.92626	0.130967	1.16432	0.490118	-0.245721	-0.472764	-0.176545	-0.569725	0.251846	-0.0945567	0.108883	-0.697949	-1.16982	-1.41864
Cdc20	0.772666	-0.605534	-0.517519	-0.505715	-0.485102	0.515652	3.73377	-0.112672	-0.114532	-0.385288	-0.585502	-0.568319	-0.563823	-0.603608	0.424372	-0.172825	0.791234	0.155296	-0.568897	-0.603654
Cdc23	1.18142	-1.35272	-0.880888	-0.511938	1.04086	0.244747	2.47391	0.511548	0.23952	0.0206647	-0.72064	0.178567	-0.152706	-0.825216	0.956695	-0.277919	1.01458	-0.449548	-1.18219	-1.50875
Cdc25a	0.452004	-0.915031	-0.925074	0.69636	-1.02102	1.45762	0.707376	-0.311879	1.37847	0.475429	-0.700656	-0.828804	-0.735984	-0.788271	-0.1736	0.306722	-0.304091	2.64101	-0.389548	-1.02102
Cdc25b	1.38089	0.606555	0.639014	-0.632717	2.2298	0.460955	2.51321	-0.428254	-0.701692	-0.657664	-0.706152	-0.565028	-0.285862	-0.724911	-0.353962	-0.619865	-0.150467	-0.580905	-0.725934	-0.697013
Cdc25c	2.07637	-0.733934	-0.488769	-0.733934	-0.57826	0.526798	2.63435	-0.304945	-0.150237	-0.35113	-0.733934	-0.601381	-0.596036	-0.715024	1.00015	-0.182902	1.37076	-0.10796	-0.721038	-0.608941
Cdc26	0.271428	-2.01394	-1.36681	-0.343324	1.18484	1.6623	1.37611	0.431839	1.48251	0.619196	0.269451	-0.610184	0.225407	-0.312577	-0.111414	0.389068	-0.0383357	-1.13425	-1.14522	-0.836103
Cdc27	1.63773	-1.2425	-0.636991	-0.798323	-0.388926	1.13646	2.65192	-0.87919	-0.152068	0.54656	-0.580656	-0.604167	-0.0849875	-0.513446	0.978701	-0.30399	0.941549	-0.168315	-0.632289	-0.907065
Cdc34	2.05987	-1.99509	-1.87488	0.832975	1.42209	1.00542	0.101183	-1.14025	0.566979	0.606009	-0.20911	0.149492	-0.835275	-0.292026	0.409675	0.20656	0.109241	-0.215842	-0.507274	-0.399754
Cdc37	-0.387016	-2.02406	-1.8006	0.215005	0.961687	0.967214	0.832829	0.0210731	0.835282	0.798038	0.509704	0.974246	-0.0638264	0.341546	0.461721	0.46564	0.76867	-0.914192	-1.47135	-1.49161
Cdc37l1	-0.122713	-1.71638	-1.23576	-0.0898358	1.87548	1.46253	2.23012	-0.21634	0.627762	0.799768	0.275825	0.361965	-0.38614	-0.647264	-0.175783	-0.733052	-0.633123	-0.548479	-0.800361	-0.328215
Cdc40	-0.908535	-1.69052	-1.47658	-1.29081	0.925384	0.803689	1.27934	0.322805	0.0973897	1.17073	0.100948	-0.182848	0.19121	0.923032	0.161616	0.76424	1.57846	-0.671931	-0.764569	-1.33305
Cdc42	-1.34142	-1.73163	-1.8582	-0.696147	-0.076255	-0.330057	0.0267047	0.767225	-0.456545	-0.622798	-0.330151	-0.236064	0.108357	1.36887	0.653077	1.11804	1.48751	-0.0697649	0.581765	1.63747
Cdc42bpa	3.81844	-0.41406	-0.41406	-0.41406	-0.41406	-0.00845708	-0.0846533	0.206372	-0.256559	1.5065	-0.123028	-0.41406	-0.41406	-0.308249	-0.41406	-0.195706	-0.41406	-0.41406	-0.41406	-0.41406
Cdc42ep2	-0.314587	-0.483699	-0.3446	-0.483699	-0.325389	-0.483699	-0.483699	-0.483699	-0.444409	-0.203398	-0.483699	-0.394454	-0.125899	0.844044	0.0659975	-0.187723	-0.185505	-0.407402	1.08807	3.83745
Cdc42ep3	1.31076	-1.30581	-1.05695	-0.833658	0.868452	1.01279	2.75644	0.63986	-0.617422	-0.287721	-1.1866	0.0293683	-0.997038	0.466525	-0.760271	0.142133	0.303816	-0.383634	-0.208473	0.107451
Cdc42ep4	1.31993	-0.874124	-0.679168	-1.0184	-0.552055	-0.721029	-0.581767	0.678415	0.48328	-0.386005	-0.877092	-0.936747	-0.680419	1.4111	0.818631	1.73291	2.09844	-0.108868	-0.276377	-0.850652
Cdc42se1	-1.10447	-1.58205	-1.78785	-0.933196	-0.149399	-0.501866	-0.331642	0.638367	-0.779484	-0.763263	1.52232	0.402917	0.768069	0.460953	1.08325	0.513861	0.562062	-0.352028	0.346313	1.98713
Cdc42se2	-1.11845	-1.05268	-1.23066	2.4835	-0.247994	-0.166646	0.369462	1.67212	-0.777452	-0.277156	0.904204	0.116558	1.12722	-0.0887231	1.15686	-0.398463	-0.418539	-0.735185	-0.838821	-0.479156
Cdc45	0.893596	-0.90569	-0.858464	-0.704359	-0.712485	1.82641	2.66749	0.0539105	0.388414	-0.15336	-0.832807	-0.805054	-0.685308	-0.854268	0.171512	0.801422	0.637271	0.549143	-0.730691	-0.746683
Cdc5l	0.452888	-1.49574	-1.05214	-0.645947	1.46267	1.47264	2.32791	-0.411912	-0.438023	0.604334	0.00243328	-0.203359	0.220606	-0.176404	0.934602	-0.23072	0.351918	-0.946688	-1.23097	-0.998105
Cdc6	3.44102	-0.569121	-0.487985	-0.274937	-0.538158	1.68389	0.681449	-0.10852	0.14456	0.313582	-0.616347	-0.624695	-0.649001	-0.540502	-0.247492	0.297642	-0.58798	-0.0367823	-0.619277	-0.661347
Cdc7	0.948619	-0.846105	-0.833853	-0.614459	-0.95102	0.788522	2.78015	0.110356	0.403537	0.244017	-0.838395	-0.540405	-0.798026	-0.823803	0.366441	0.116243	0.611884	1.58457	-0.757251	-0.95102
Cdc73	0.574731	-1.37581	-1.0934	-0.384135	1.43664	1.76539	1.6073	-1.40522	-0.258571	1.55742	-0.513882	0.240311	-0.412958	0.228244	0.264265	0.0929432	-0.338548	-0.405685	-0.0635966	-1.51544
Cdca2	0.270285	-0.688407	-0.688407	-0.551487	-0.504449	0.586931	3.50345	-0.0703061	0.0339428	-0.252471	-0.641439	-0.523148	-0.586938	-0.663785	0.590855	-0.174241	1.35224	0.364428	-0.668648	-0.688407
Cdca3	2.50406	-0.733841	0.0362133	-0.743269	-0.617402	0.216205	2.40948	-0.202997	-0.110931	-0.512662	-0.719379	-0.693701	-0.680769	-0.71083	0.393003	-0.0537921	1.30193	0.403964	-0.715533	-0.769753
Cdca4	2.1934	-0.838534	-0.878762	-0.73807	-0.558446	0.844319	2.78836	-0.138871	0.0219172	-0.218208	-0.610546	-0.313392	-0.462795	-0.651873	-0.00471	0.12438	0.824743	0.29035	-0.759786	-0.913478
Cdca5	0.841684	-0.627577	-0.658887	-0.61911	-0.61817	0.905222	3.41188	-0.222647	0.144176	-0.249536	-0.662256	-0.598487	-0.691058	-0.684309	0.422318	-0.0784414	1.07804	0.277246	-0.669497	-0.700585
Cdca7	-0.294338	-0.753603	-0.724133	-0.727873	-0.200864	2.83882	0.481594	-0.418738	1.70893	1.4614	-0.66036	-0.579779	-0.366642	-0.751837	-0.409094	0.805082	-0.745065	0.474031	-0.48383	-0.653695
Cdca7l	-0.375466	-0.990315	-0.969892	-0.946168	0.819231	1.33575	0.145094	-0.0933064	2.22506	2.13832	-0.258839	0.113738	-0.881432	-0.883791	0.0319925	0.16677	-0.598147	0.715095	-0.668317	-1.02538
Cdca8	1.62505	-0.700985	-0.300657	-0.765074	-0.641884	0.359456	3.02695	0.0150632	0.00288786	-0.368854	-0.730798	-0.667752	-0.741816	-0.740257	0.525042	-0.0593906	1.35112	0.286042	-0.716804	-0.757342
Cdh1	-0.27778	-0.309828	-0.309828	-0.309828	-0.309828	-0.309828	-0.309828	3.91038	-0.302299	-0.294725	1.44788	-0.309828	-0.309828	-0.297984	-0.173401	-0.302559	-0.309828	-0.301404	-0.309828	-0.309828
Cdh5	-0.222012	-0.297445	-0.297445	-0.297445	-0.297445	-0.267855	-0.151472	-0.297445	-0.27793	-0.24257	4.0859	-0.297445	-0.297445	-0.297445	0.937251	-0.297445	-0.297445	-0.291967	-0.297445	-0.297445
Cdipt	-0.713152	-1.70943	-1.98178	1.14542	1.57821	-0.510937	0.353741	1.36543	-0.248366	-0.0103019	0.65473	0.707524	1.05458	0.339234	-0.179701	-0.128574	0.854818	-0.590805	-0.616056	-1.36459
Cdk1	1.91197	-0.608978	-0.63364	-0.533994	-0.678074	0.402663	3.11785	0.00158133	0.00347941	-0.377908	-0.649598	-0.609555	-0.632359	-0.658212	0.0282561	-0.173879	1.11364	0.266769	-0.648547	-0.641465
Cdk11b	0.352881	-2.27916	-2.04059	0.151908	-0.269977	0.721696	0.768542	-1.12593	-0.656179	0.864175	-0.109915	0.400458	0.0565326	-0.18991	0.412729	-0.212047	0.134959	-0.187452	1.95049	1.2568
Cdk12	-0.47598	-1.32999	1.88603	-0.421398	0.611335	0.444231	0.470632	-0.0685948	-0.917049	0.772565	0.844025	0.3508	1.83988	-0.320408	0.980755	-0.261879	-0.314349	-1.41734	-1.32657	-1.3467
Cdk13	-0.202184	-1.86657	-0.953993	-0.735072	0.538053	0.0475157	0.323608	-0.234877	-1.05176	0.219748	1.26066	1.15611	2.45575	0.626567	0.73837	0.143951	0.188281	-1.16666	-0.727904	-0.759601
Cdk16	2.71507	-1.38734	-0.225954	0.0973177	0.88048	0.091514	0.126647	-1.28609	0.391347	1.5855	0.11114	-0.629515	-0.535027	-0.198568	0.0791106	0.358423	0.776998	-0.823135	-0.831396	-1.29653
Cdk17	0.499381	-1.22923	-1.0264	0.204899	3.27327	0.022669	0.242636	-0.239915	-0.773351	0.759614	-0.344507	1.43985	0.00356828	-0.541322	-0.129234	-0.684663	-0.676209	-0.742224	-0.310098	0.251259
Cdk19	-0.731043	-1.46152	-1.30177	-1.25859	1.76729	0.373116	1.75869	-0.117433	-0.427524	1.08059	0.183961	-0.59468	0.463115	0.134266	0.0914991	-0.308869	1.91368	-0.237978	-0.728074	-0.598729
Cdk2	1.34506	-1.17177	-1.1333	-0.444724	0.453735	1.94081	2.03431	-0.0631511	0.621527	-0.244048	-0.988216	-1.15744	-0.498605	-0.910236	-0.301302	0.0670674	-0.00849256	1.34499	-0.23777	-0.648441
Cdk20	0.347378	-0.590376	-0.590376	-0.590376	0.210095	-0.329081	0.12949	-0.590376	-0.316197	0.58315	3.89789	-0.096602	-0.590376	-0.38036	0.549676	-0.0383452	-0.0012059	-0.423252	-0.590376	-0.590376
Cdk2ap1	0.48229	-1.24479	-1.53372	-0.0927802	0.341176	1.78788	0.553677	-0.614753	0.388962	1.92085	-0.430287	-0.387428	-0.76559	-0.335456	1.32827	0.534384	0.81224	-0.237865	-1.05881	-1.44826
Cdk2ap2	-0.773551	-1.45811	-1.19169	-0.275465	-0.74322	-0.776224	-0.619065	0.163272	-0.148725	-1.07817	-0.111784	-0.0393604	-0.324811	1.73371	0.444144	0.177216	0.444303	0.79572	1.3016	2.48021
Cdk4	0.240431	-1.13322	-1.15483	-0.198379	0.172393	2.40091	1.14717	-0.143519	1.15997	1.64401	-0.528077	-0.242764	-0.45846	-0.711025	0.253685	0.781127	-0.0727252	-0.867947	-1.1342	-1.15455
Cdk5	-0.972412	-1.82552	-1.93583	2.91689	0.285689	0.0287249	-0.0654107	-0.30497	0.151922	0.469553	-0.0664076	0.486178	-0.324329	0.039904	0.634312	0.166417	0.850934	0.21	-0.0418142	-0.703832
Cdk5r1	-0.427028	-0.693601	-0.636434	-0.93056	0.730201	1.23903	2.22242	-0.93056	0.390765	-0.402836	-0.360724	-0.636451	-0.230385	-0.484892	-0.764018	-0.557549	-0.741651	-0.0242794	0.793324	2.44522
Cdk5rap2	1.32817	-1.33033	-0.801602	0.0537701	0.301126	0.238306	2.64298	-0.287938	-0.206555	0.0747721	-0.00822178	-0.17191	-0.304576	-1.10244	0.79209	-0.00858075	1.55208	-0.267451	-1.21699	-1.2767
Cdk5rap3	-0.79886	-1.08076	-0.872933	2.62577	-0.631234	-0.283315	-0.248149	1.01802	0.687849	0.511144	1.43013	1.02471	-0.660774	-0.151903	0.126382	0.276578	0.268597	-1.0317	-1.12608	-1.08347
Cdk6	-0.148644	-0.845449	-0.845449	-0.845449	1.153	0.532416	-0.210379	0.503204	1.83564	2.94098	-0.451876	-0.498467	-0.152487	-0.557882	0.50255	-0.269573	-0.622118	-0.575722	-0.598846	-0.845449
Cdk7	-0.0938107	-1.86465	-1.40449	0.0240559	1.32818	-0.189156	0.848551	0.686276	0.795901	1.69817	1.00684	0.528047	0.210449	0.0893021	0.60713	-0.0402786	-0.619567	-1.02001	-0.77722	-1.81373
Cdk8	2.6112	-0.993835	1.05153	0.69051	0.0757252	1.04886	0.992862	-1.35864	-0.246271	0.292075	-0.117326	-0.319167	-0.00945982	0.143776	0.488262	-0.310757	-0.223969	-0.951515	-1.44267	-1.42118
Cdk9	-0.897973	-1.72989	-1.56401	-0.387764	1.71391	1.36012	0.568837	-0.89932	-0.743416	0.371635	1.00369	-0.156545	0.265842	0.910939	1.01844	0.427521	0.960673	-1.027	-0.871017	-0.32467
Cdkal1	-0.822991	-1.52997	-1.09079	-0.818733	1.19357	0.54812	2.3926	-0.738139	0.0778461	0.673772	1.25195	0.503427	0.488802	0.0652455	0.108739	0.203416	0.464466	-0.482529	-1.19733	-1.29148
Cdkl1	0.940668	0.916297	3.89276	-0.39718	-0.39718	-0.327087	-0.290706	-0.258784	-0.39718	-0.297085	-0.34326	-0.349876	0.031972	-0.36774	-0.39718	-0.369726	-0.39718	-0.39718	-0.39718	-0.39718
Cdkn1a	-0.789912	-0.71958	-0.793949	-0.751054	-0.11264	-0.0538267	0.660041	0.434365	-0.655561	0.479865	-0.722828	-0.533117	-0.556749	2.41567	0.275304	0.961998	2.45366	-0.453241	-0.744496	-0.793949
Cdkn1b	0.371036	-0.142141	3.75486	-0.372103	1.20994	-0.277164	0.296111	-0.191919	-1.04447	-0.711053	-0.027496	-0.168809	-0.107748	-0.436023	-0.128824	-0.63846	-0.17522	-0.692427	-0.406234	-0.111849
Cdkn2aip	0.760533	-1.30203	-1.09728	-0.335375	2.81934	0.996676	1.81571	-0.659223	-0.271754	0.647361	-0.395886	0.157851	-1.0763	-0.371474	0.000676711	-0.0441561	-0.211076	-0.448919	-0.620093	-0.364583
Cdkn2aipnl	0.0477678	-1.8865	-1.84242	0.57619	0.380871	1.8249	1.67466	0.36968	0.854925	0.353624	-0.706028	0.360857	0.14058	-1.35431	0.103338	-0.245147	0.391871	0.431572	-1.21612	-0.260293
Cdkn2c	1.5412	-0.78892	-0.637158	-0.487959	-0.233031	0.400213	2.59147	-0.277268	-0.546905	-0.644623	-0.109194	-0.722952	-0.804062	-0.667848	1.17309	-0.177119	1.62707	0.569349	-0.884118	-0.921244
Cdkn2d	1.94088	-1.01072	-0.70999	-1.09476	-0.4884	-0.259271	2.68832	-0.296524	-0.820169	-0.730737	0.234251	-0.559606	-0.668143	-0.459487	0.399891	-0.466291	1.30414	0.559776	-0.0722466	0.509086
Cdkn3	1.93662	-0.74897	0.0526722	-0.767895	-0.686563	0.0391882	2.65691	0.0193648	-0.205686	-0.620342	-0.742872	-0.752896	-0.783038	-0.721826	0.284533	0.134965	1.4304	0.869318	-0.622172	-0.771723
Cdr2	1.40748	1.8302	3.33411	-0.293925	-0.409583	-0.393773	-0.370611	-0.409583	-0.402438	-0.380053	-0.383895	-0.356321	-0.409583	-0.389926	-0.394166	-0.396975	-0.397163	-0.3928	-0.381412	-0.409583
Cds1	-0.477186	-0.347987	-0.555035	-0.555035	-0.555035	-0.385461	-0.555035	-0.555035	0.501109	0.270234	3.68838	-0.555035	-0.555035	0.585669	0.771989	0.705806	0.237792	-0.555035	-0.555035	-0.555035
Cds2	-1.16948	-1.43531	-1.25872	0.211204	1.21932	-0.191852	-0.244928	0.913483	-0.973139	-0.0345035	1.11402	-0.197434	-0.222848	-0.177811	-0.646058	-0.479145	-0.598814	0.258014	1.4651	2.4489
Cdt1	3.00077	-0.895255	-0.924649	-0.428621	-0.434419	1.0794	0.759335	-0.469065	0.919417	0.716486	-0.85683	-0.315541	-0.241131	-0.627813	-0.336579	1.27409	-0.394467	-0.123708	-0.901582	-0.799835
Cdv3	0.230904	-1.33967	-1.24311	1.86482	-0.214671	2.79856	0.893232	-0.376222	-0.0724679	0.6735	0.0192945	-0.153404	0.0124099	-0.502958	0.0664446	-0.0693705	-0.155697	-0.224469	-0.935828	-1.2713
Cdyl	3.51505	-1.1799	0.258713	-1.00466	-1.11518	0.0200282	0.373814	-0.891549	-0.470783	-0.0404785	0.934811	-0.209425	0.177067	-0.121312	0.610037	0.051863	0.176409	-0.306	-0.327522	-0.450989
Cdyl2	-1.00959	-1.06246	-0.689365	0.0254938	1.88527	-0.22291	-0.529882	2.17297	-0.349802	-0.329573	1.01573	0.0364634	2.01411	-0.390893	0.225505	-0.568637	-0.86238	-0.0985089	-0.199074	-1.06246
Ceacam1	-0.922692	-0.869739	-1.02703	-0.84622	-0.409253	-0.24539	-0.465945	-0.5975	0.0776341	-0.773862	0.72481	-0.945121	0.216045	0.819938	-0.58436	-0.100084	0.286767	2.3261	2.24607	1.08982
Ceacam10	-0.334756	-0.317157	-0.34725	-0.31136	-0.320503	-0.344133	-0.29293	-0.34725	-0.326325	-0.343711	-0.30994	-0.28728	0.0375877	-0.288244	-0.34725	-0.333512	-0.34725	-0.159765	1.41152	3.90951
Cebpa	-0.444961	-0.44069	-0.436152	-0.443369	-0.435539	-0.439742	-0.440948	4.03768	0.239003	-0.114556	-0.174164	-0.444274	-0.447232	0.506347	0.0416009	0.340568	0.217204	-0.363085	-0.414463	-0.343223
Cebpb	-0.694291	-0.59105	-0.657162	-0.537486	-0.736306	-0.703661	-0.706594	0.30193	-0.295401	-0.612719	-0.552289	-0.485847	-0.342649	2.30668	-0.510169	1.04544	1.80256	-0.165785	-0.0438173	2.17862
Cebpd	-0.798213	-0.721451	-0.673433	-0.844553	-0.836732	-0.792882	-0.807064	-0.329138	0.36866	-0.497857	-0.356868	-0.807346	-0.531681	0.677464	-0.218889	0.765942	0.75819	1.44858	1.56657	2.6307
Cebpe	-0.472551	-0.299803	-0.40918	-0.404727	-0.471557	-0.467982	-0.452471	-0.480444	1.21236	-0.395322	-0.443336	-0.46744	-0.360226	-0.350758	-0.491326	-0.384458	-0.38053	3.26507	1.97828	0.276394
Cebpg	0.808455	-1.5219	-1.30132	0.249158	-0.564332	0.442474	1.1516	1.17123	-0.582342	0.0167998	0.318966	-0.925647	-0.799653	1.43886	1.29981	1.05263	0.92763	-1.02945	-1.17484	-0.978129
Cebpz	-0.514361	-1.99739	-1.68396	-0.486756	0.569851	0.931795	-0.889933	0.0030416	0.450132	1.84384	0.721411	0.223228	1.71173	0.58564	0.0894353	0.723432	-0.695628	-0.726447	-0.0229445	-0.836128
Cecr2	-0.210736	-0.389217	-0.381621	-0.415282	1.82408	1.84108	3.05786	-0.417569	-0.455854	-0.41603	-0.444765	-0.464926	0.0544982	-0.447908	-0.457332	-0.449514	-0.464926	-0.441448	-0.455462	-0.464926
Cela1	3.59225	0.119591	-0.199374	-0.593035	-0.593035	-0.534791	-0.593035	0.730514	0.0106385	1.62431	-0.593035	-0.336038	-0.593035	-0.065301	-0.431088	-0.456163	-0.342534	-0.333404	-0.205768	-0.207672
Celf1	2.38106	-1.63331	-0.375618	-0.672224	0.762807	0.620511	1.11323	-1.14697	-0.785038	0.55404	1.05761	0.734608	0.678151	-0.0798191	0.0910249	-0.198078	0.00714027	-0.707417	-1.0159	-1.38579
Celf2	-1.7132	-1.67974	-1.69131	-0.899685	1.91115	0.519692	1.18462	-0.373367	-0.299208	0.730644	1.03648	0.431524	0.347369	0.214897	1.11307	0.131372	0.256628	-0.604982	-0.607742	-0.00822099
Cenpa	2.01793	-0.853664	0.367561	-0.796445	-0.725322	0.680616	2.36794	0.0442407	-0.352333	-0.536718	-0.827891	-0.764584	-0.697794	-0.798981	0.57578	0.103189	1.58774	0.1225	-0.751113	-0.762648
Cenpb	-0.475279	-1.29402	-1.18788	1.88756	0.759767	0.865994	-0.203619	-0.677585	-0.691905	0.169143	-0.443119	0.0378237	1.44899	0.726049	0.958905	0.773937	0.958192	-0.885214	-1.25075	-1.47698
Cenpc1	1.11095	-0.894244	0.294011	-0.0588553	-0.288664	0.201789	3.50122	-0.259973	-0.256913	-0.256366	-0.36889	-0.659513	-0.286377	-0.85549	0.67749	-0.36619	0.680851	0.00629187	-0.899887	-1.02124
Cenpe	1.49588	-0.708119	0.275144	-0.704517	-0.637271	0.265375	3.19059	-0.145468	-0.279863	-0.438613	-0.669426	-0.620575	-0.69231	-0.677384	0.52564	-0.180338	1.31259	0.0550578	-0.661173	-0.705218
Cenpf	2.2729	-0.642856	0.100722	-0.6655	-0.582812	0.189601	2.91473	-0.227891	-0.423869	-0.36421	-0.631271	-0.595644	-0.616559	-0.656064	0.660156	-0.338699	0.887626	0.00783659	-0.638449	-0.649747
Cenph	2.39999	-0.903554	-0.824052	-0.866252	-0.670035	1.1874	1.80268	0.230243	0.709778	0.384352	-0.918404	-0.69728	-0.687614	-0.954273	0.151305	0.407552	0.688897	0.380925	-0.919169	-0.902485
Cenpi	2.09456	-0.857878	-0.4677	-0.857878	-0.857878	0.556993	2.18714	-0.325695	0.15224	-0.293729	-0.857878	-0.583309	-0.664965	-0.749031	0.894326	0.172684	1.34503	0.82873	-0.857878	-0.857878
Cenpj	-0.566123	-0.92874	-0.875511	-0.276086	-0.319763	1.13367	3.64922	0.165478	-0.212019	0.233265	-0.765869	0.0283696	-0.677926	-0.604979	0.482357	-0.149964	0.0902316	0.370193	-0.267619	-0.50819
Cenpk	3.50349	-0.60356	-0.0834931	-0.520713	-0.729574	0.759266	1.51835	-0.168559	0.0771012	-0.0718868	-0.647606	-0.617431	-0.602283	-0.668928	-0.0690245	-0.00936657	0.17625	0.144856	-0.699409	-0.687477
Cenpl	2.72004	-0.78109	-0.316047	-0.657827	-0.578023	0.116931	2.30893	0.304181	-0.337602	-0.409415	-0.700534	-0.533246	-0.73211	-0.70976	0.0390784	-0.333527	1.30829	0.375799	-0.679035	-0.405034
Cenpm	0.599006	-0.730028	-0.616305	-0.402938	-0.577616	1.36826	3.34003	-0.266883	0.173973	-0.0829592	-0.706049	-0.657386	-0.608326	-0.711389	0.789285	0.225999	0.652931	-0.312058	-0.738742	-0.738806
Cenpn	1.22323	-0.70675	-0.570706	-0.627418	-0.304335	1.21684	3.49079	-0.214119	-0.0683801	-0.00417318	-0.647787	-0.451402	-0.571594	-0.644128	-0.0264703	-0.140892	0.439921	-0.058696	-0.627179	-0.70675
Cenpo	-0.0452191	-1.24975	-1.35233	-0.928087	-0.898048	1.99222	1.90446	0.485837	0.218854	1.21181	-0.492018	-0.600188	0.00231325	-0.774822	-0.328901	0.305373	1.55441	0.0919651	-0.831506	-0.266381
Cenpp	2.12566	-0.620579	-0.673166	-0.522585	-0.53103	0.708485	2.99942	-0.303091	0.565959	-0.0304289	-0.737746	-0.696726	-0.656258	-0.648995	-0.107092	0.0182642	0.401088	0.184071	-0.725052	-0.750202
Cenpq	2.13879	-0.566416	2.08269	-1.12417	-0.393622	0.873857	1.35307	0.202371	-0.062375	-0.329189	-0.798375	-0.359343	-0.0398307	-1.46695	0.00815851	-0.139026	0.819267	-0.231767	-0.954776	-1.01236
Cenpt	0.603681	-0.934422	-0.491273	-0.934422	-0.469243	0.243865	3.16802	-0.26562	0.125228	0.177688	-0.785095	-0.515737	-0.191881	-0.858276	1.21	0.00198463	1.27647	0.287056	-0.713611	-0.934422
Cenpv	2.04842	-0.620319	-0.809462	1.95185	-0.809462	-0.472164	1.8301	-0.809462	-0.446363	1.43532	-0.622382	0.481408	-0.30889	-0.549347	0.285513	-0.248619	-0.144051	-0.793132	-0.809462	-0.589497
Cenpw	1.25111	-1.02095	-0.116954	-0.784708	-0.806969	1.53108	1.48799	0.351851	1.72364	0.195908	-0.946276	-0.855454	-0.976659	-1.04055	0.230231	0.904684	0.737576	0.263489	-1.01382	-1.11522
Cep110	-0.75489	-1.22156	-1.09109	-0.841741	0.355733	1.38212	3.11836	-0.275277	-0.285026	0.357891	-0.00760075	0.158524	0.157813	-0.587684	0.556871	-0.0707452	0.602126	0.235592	-0.531901	-1.25751
Cep120	-0.510013	-1.64988	-1.73894	2.06578	1.30144	-0.0881319	0.740052	0.423768	-0.857778	-0.554103	1.16977	1.03515	-0.190921	-0.301509	1.20883	-0.520294	0.113081	-0.415769	-0.695554	-0.53498
Cep135	1.95078	-1.22357	-1.07936	-1.22357	0.705314	0.0164502	2.4969	-0.291925	-0.586652	0.165376	0.191193	0.252021	-0.0602293	-0.363171	1.17287	-0.163743	0.417702	-0.476416	-0.98003	-0.919948
Cep152	2.49947	-1.12603	-1.12603	-1.12603	-0.171796	1.28194	1.90968	-0.174315	-0.260323	-0.0418824	-0.274908	-0.387619	0.683826	-0.78553	0.584379	0.391451	-0.226538	0.103859	-0.627572	-1.12603
Cep164	0.151212	-1.38514	-0.110585	-1.85479	1.88605	0.927815	0.969387	1.27525	0.0789183	-0.525733	1.46407	0.861621	-0.0564288	-0.486828	0.255843	-0.0879156	-0.60749	-0.750478	-0.687507	-1.31728
Cep170	-0.800675	-1.02952	-1.57774	-0.65371	2.51794	0.196282	0.931551	0.039614	-0.880544	-0.0721396	0.157666	-0.556013	0.364924	1.30745	0.438319	0.124708	1.43797	-1.05606	-0.886933	-0.00309156
Cep192	0.58473	-1.4477	-1.21672	0.0405404	-0.213507	0.525117	1.62319	0.106935	-0.244274	0.145683	1.34804	-0.15631	-0.976225	-0.583306	1.52451	0.0188306	1.82015	-0.415083	-1.25762	-1.22699
Cep250	-0.38745	-0.747304	-0.775791	0.287227	4.06068	0.230248	0.0374472	0.0865004	-0.213251	-0.141298	0.165945	0.0591084	-0.384619	-0.366594	-0.271216	-0.336862	-0.134542	-0.441266	-0.444566	-0.282397
Cep290	3.23042	-0.8956	0.355725	-0.288672	0.849173	0.116469	-0.483513	-0.310468	-0.182943	1.41937	0.808201	-0.86945	-0.82271	-0.320153	-0.233757	0.0800639	0.0837664	-0.685969	-0.900246	-0.94971
Cep350	-0.396925	-2.22172	-1.45631	-1.04819	0.396354	-0.196201	0.235526	-0.0957656	-0.115028	0.882593	0.791767	0.30324	1.03734	0.951895	0.561814	1.01436	1.86236	-0.869005	-0.927684	-0.710423
Cep55	-0.477082	-0.53692	-0.53692	-0.464593	-0.475806	0.466388	3.77559	-0.255834	-0.122651	-0.221342	-0.453206	-0.380289	-0.53692	-0.530797	0.719979	-0.076617	1.07472	0.0771057	-0.507891	-0.53692
Cep57	1.66867	-1.31729	-1.21646	-0.160322	-0.0777059	1.14261	2.3221	0.0544087	-0.252976	0.066317	0.845408	-0.654353	0.303528	-0.876665	0.606453	0.0224902	0.363998	-0.129713	-1.30459	-1.40591
Cep57l1	0.912236	-1.20263	-0.486743	-1.27582	1.56804	0.780314	1.92254	-0.191999	0.166498	1.64536	-0.0834871	-0.0328674	-0.739705	-1.1126	0.728413	-0.225367	0.151415	-0.115114	-1.13266	-1.27582
Cep63	-0.179075	-1.52651	-1.52651	0.156775	2.75916	0.789202	1.30812	-0.942861	-0.10378	0.348398	0.438336	-0.0473566	0.539013	-0.0386283	0.0914243	0.0376429	0.445341	-0.604565	-1.39922	-0.544911
Cep68	-0.622703	-0.819775	-0.819775	-0.151834	3.6131	0.171027	-0.223461	-0.348738	0.353628	0.993006	-0.00774845	0.100904	0.753376	-0.503559	0.426949	-0.362637	-0.766051	-0.419262	-0.546676	-0.819775
Cep70	3.05675	-0.90138	0.185058	-0.90138	-0.363874	0.490748	2.11588	-0.620082	-0.350786	0.283847	0.00415385	-0.56176	-0.383573	-0.465839	0.212114	-0.32133	0.474078	-0.260116	-0.791126	-0.90138
Cep72	0.70857	-0.807467	-0.807467	-0.296485	0.0210056	0.834068	3.59688	-0.55642	0.0804404	-0.286262	-0.587185	-0.807467	-0.282342	-0.630528	0.196634	-0.0315984	0.49713	0.557826	-0.591865	-0.807467
Cep76	3.71461	-0.509703	1.18343	-0.0633855	-0.437532	-0.0916866	1.0139	-0.416286	-0.199227	-0.161393	-0.488924	-0.427645	-0.631741	-0.573104	-0.227207	-0.298657	-0.120119	-0.0287427	-0.604849	-0.631741
Cep78	-0.0990542	-1.04106	-1.05813	-0.0721587	1.30693	0.880286	3.04569	-0.403776	-0.038044	-0.00198732	0.0967133	-0.881439	-1.20079	-0.0237221	0.351314	0.735099	0.451291	-0.199067	-0.839627	-1.00846
Cep97	-0.484339	-1.04819	-0.975916	-0.233034	0.952118	1.97436	1.73611	0.706793	-0.0765178	1.37898	-0.306516	1.34162	0.151376	-0.866918	-0.0465261	-0.471381	-0.769598	-0.877686	-1.09675	-0.98799
Cept1	-0.703914	-1.33013	-1.41642	-0.854552	0.205598	-0.709725	-0.370651	-0.447067	-0.195169	-0.4836	-0.358616	-0.437785	0.168395	2.00302	0.460211	0.720218	0.850338	-0.163172	0.456426	2.60659
Cercam	3.17354	-0.309379	-0.131178	-0.742181	-0.23445	-0.492634	-0.125685	1.40519	0.0702056	0.786518	-0.322533	-0.742181	-0.742181	-0.364501	1.47995	-0.483857	-0.0424808	-0.6978	-0.742181	-0.742181
Cerk	-0.91133	-0.86811	-0.927388	0.351407	3.14859	1.02993	1.73578	0.0656396	0.0906697	-0.329228	-0.0468237	-0.543448	0.29865	-0.0919733	-0.0885455	-0.339179	-0.329083	-0.643607	-0.815008	-0.786938
Ces2g	3.816	-0.248764	1.62034	-0.339721	-0.339721	-0.339721	-0.339721	-0.339721	-0.313954	0.0877973	-0.339721	-0.339721	-0.339721	-0.326842	-0.328939	-0.315571	-0.339721	-0.297243	-0.295615	-0.339721
Cetn2	-0.808951	-1.65551	-0.966638	-0.68645	1.0458	1.04473	1.17628	2.30332	0.459262	0.3514	0.678535	1.01004	0.414938	-0.47053	-0.261201	-0.38425	-0.40223	-0.801636	-1.0498	-0.997123
Cetn3	1.1447	-1.78748	-1.33914	-0.744218	0.758816	0.92674	1.38768	0.409474	1.32917	1.17396	-0.712601	0.174517	-0.56878	-0.513807	0.404626	0.436948	0.251635	0.00665882	-1.0695	-1.66941
Cfdp1	0.166693	-1.94446	-2.05449	1.51416	1.35511	1.08617	0.0535671	0.128022	0.786888	0.97894	0.557568	0.375499	0.179974	-0.170589	-0.034506	0.170848	-0.0675499	-0.879983	-0.702155	-1.49971
Cfh	-0.451455	-0.339849	-0.451455	-0.451455	-0.451455	-0.451455	-0.380152	-0.451455	-0.451455	0.00568033	-0.451455	-0.344439	-0.451455	2.94082	2.67935	0.213808	0.590069	-0.419551	-0.431188	-0.451455
Cfl1	-0.965971	-2.21581	-2.24186	-1.33296	0.292972	1.07313	0.950179	0.0953812	-0.000904239	0.0915836	-0.0177246	-0.144177	0.0722861	0.32494	0.780541	1.12369	1.38835	0.447966	0.252763	0.0256251
Cfl2	0.392852	-1.61542	-1.9983	0.0252463	0.794932	0.0483157	0.74423	-0.527089	0.186965	1.38965	1.65794	-1.3472	0.231357	0.338169	0.842923	0.057102	0.842724	0.196698	-0.957832	-1.30326
Cflar	-1.63331	-1.61885	-1.80609	0.575177	0.863195	-0.0558131	0.25361	2.31616	-0.518796	0.160747	1.1362	0.718607	-0.102638	0.16017	-0.305424	-0.516891	0.0607501	-0.371325	1.07262	-0.388097
Cfp	-0.868856	-0.639858	-0.841283	-0.88909	-0.88032	-0.884177	-0.812454	-0.671943	-0.397547	-0.344711	0.786321	-0.845465	-0.0101724	1.10054	1.37155	1.71235	2.00543	-0.45763	0.247408	1.3199
Cggbp1	-0.0573034	-2.23549	-2.10526	-0.417354	0.430723	1.1103	1.40351	0.199057	0.112646	1.43859	0.649796	-0.676388	-0.290879	-0.280418	0.964961	0.558588	0.794942	-0.261404	-0.651736	-0.686881
Cgrrf1	2.06895	-1.81188	-0.234558	0.210683	2.58508	-0.446159	0.0227064	-0.358539	-0.081054	-0.488024	-1.10785	-0.475844	-0.192738	-0.0109264	-1.01147	0.380179	1.17495	0.0560167	-0.152322	-0.127198
Chac1	-0.36401	-0.221225	-0.456886	3.70112	-0.456886	-0.456886	-0.456886	1.53773	-0.0563828	-0.456886	-0.456886	-0.456886	-0.456886	-0.413934	-0.456886	-0.456886	-0.456886	0.426213	0.299406	0.116827
Chac2	1.29629	0.636241	3.86057	-0.401611	-0.401611	-0.266246	-0.320312	-0.311074	-0.349587	-0.32739	-0.361649	-0.365742	-0.387634	-0.323421	-0.380298	-0.366314	-0.357036	-0.36484	-0.271562	-0.236769
Chaf1a	1.63084	-0.84952	-0.851388	-0.675054	-0.665626	2.19136	2.07491	0.0259613	0.573488	0.458093	-0.728953	-0.73948	-0.707098	-0.883257	0.0718639	0.571443	0.0470818	0.242319	-0.87452	-0.912462
Chaf1b	2.13696	-0.883374	-0.935232	-0.929206	0.156433	2.48078	0.285994	0.12669	0.932909	0.684334	-0.724888	-0.417781	-0.67549	-0.859586	-0.345896	0.977324	-0.600393	-0.0175181	-0.700678	-0.691387
Chchd1	-0.148505	-1.6483	-1.63081	-0.0855558	0.956233	1.65507	1.36418	-0.304562	1.13129	0.967716	-0.315174	0.124354	-0.288216	-0.187143	0.128761	1.04713	0.484097	-0.489069	-1.118	-1.6435
Chchd10	-0.198507	-0.44866	-0.357279	-0.042614	2.80423	1.96242	2.02923	-0.455465	-0.455982	-0.431813	-0.449304	-0.468898	0.0338374	-0.504341	-0.491253	-0.476508	-0.51147	-0.509405	-0.510668	-0.517561
Chchd2	0.584344	-1.93082	-1.57817	0.168377	1.3671	1.8137	1.24493	-0.322142	0.814786	0.826644	0.239594	-0.368159	-0.282325	-0.149447	0.0217327	0.499	0.288063	-0.871832	-0.999492	-1.36589
Chchd3	1.0754	-1.54591	-1.28589	-0.303802	1.79208	1.03066	0.96165	0.170325	-0.0214674	1.0193	0.514094	0.30696	0.207369	-0.474203	0.470264	0.0423794	0.36447	-1.07763	-1.50277	-1.74329
Chchd4	-0.302106	-1.19633	-1.03643	0.662442	-0.235179	0.823643	-0.140844	-0.17882	3.10383	1.7159	-0.101955	-0.0979226	-0.648602	-0.0703126	-0.149984	0.405961	-0.237381	-0.490331	-0.863446	-0.96214
Chchd5	-0.606274	-1.27403	-1.5861	1.45479	-0.336809	-0.109283	-0.685014	0.217982	0.925258	0.948927	1.94824	0.22141	-0.481892	0.526899	0.604887	0.679818	0.91723	-0.796042	-1.38118	-1.18881
Chchd6	-0.287135	-0.638182	-1.05585	0.16925	-0.167949	1.92141	-0.493283	-0.386772	0.508331	2.48059	1.16652	-0.580005	-0.712126	-0.847539	1.05299	0.27225	0.380552	-0.880338	-1.00889	-0.893833
Chchd7	0.397646	-0.971479	-0.342968	2.50693	1.52457	0.248676	-0.222329	-0.160052	0.679668	1.47235	0.140677	-0.233259	-0.370641	-0.479989	-0.639516	0.391232	-0.0407778	-0.900745	-1.29041	-1.70958
Chchd8	-1.39723	-1.41649	-1.26448	-1.24129	1.89762	1.18464	-0.358268	-1.07241	0.091564	0.0112506	1.43384	-0.655599	-0.341066	1.17053	0.398875	0.556576	0.753503	-0.537426	0.437239	0.348609
Chd1	-0.0910419	-1.5913	-1.13243	-0.108894	0.786533	1.69361	2.68306	0.00828187	-0.349646	0.229556	-0.167444	-0.216743	1.17299	-0.283718	0.217901	-0.00113353	-0.0118871	-0.782607	-1.05256	-1.00253
Chd1l	0.243297	-1.28253	-1.4266	-1.15199	-0.770946	1.31427	1.3267	1.43259	0.918683	1.48038	-0.324749	0.907731	0.307169	-0.956628	0.501059	0.135712	-0.146501	-0.330039	-1.25351	-0.924108
Chd2	-0.697217	-1.03901	0.900414	-0.348227	1.8464	-0.491478	-0.84956	0.377665	-0.917198	0.550695	1.76361	1.16641	1.75562	-0.56453	0.190908	-0.739528	-0.609681	-1.1156	-0.395501	-0.784195
Chd3	-0.566054	-0.754269	-0.646835	-0.754269	0.234316	0.0615657	-0.0219637	1.60994	-0.592655	0.888169	-0.00801212	3.07483	0.975576	-0.494416	0.482169	-0.618071	-0.643478	-0.731864	-0.740415	-0.754269
Chd4	-0.187257	-1.62213	-1.51037	-0.936067	2.2275	1.26928	0.945222	-0.308012	-0.207824	1.34112	0.309511	0.267665	0.270786	-0.317307	0.662057	0.148971	0.491415	-0.802582	-1.0417	-1.00027
Chd6	-0.655527	-1.17962	-1.21125	0.0770971	1.61945	0.986724	2.40911	-0.370629	-0.681952	0.632284	0.512253	0.500407	0.806904	-0.171168	0.706843	-0.445632	-0.422296	-0.992811	-1.07475	-1.04544
Chd7	-1.01035	-1.05122	-0.810962	0.739383	-0.389202	-0.999231	-1.01566	-0.53175	0.920738	-0.990956	1.0742	2.27344	1.28986	-0.167425	-0.429207	-0.501264	-0.776388	0.386179	0.683074	1.30674
Chd8	-0.300746	-1.89729	-1.70198	-0.239535	1.88333	1.45127	1.16188	0.0171053	-0.627426	0.324834	1.13247	0.408526	0.760486	0.0702691	-0.0141626	0.276889	0.129189	-0.853653	-0.858215	-1.12325
Chd9	-0.779049	-1.16112	-0.760851	0.201225	1.93523	1.25135	1.42495	0.0543862	-0.596779	1.06737	1.40546	-0.433898	-0.0194642	-0.0876826	0.795848	-0.373076	-0.241602	-1.0251	-1.29786	-1.35934
Chdh	-0.455782	-0.505231	-0.505231	-0.505231	-0.366973	-0.490629	-0.505231	0.00330337	0.891535	0.479302	3.8402	-0.362996	-0.39661	-0.493472	0.769556	-0.0658322	-0.36322	-0.208681	-0.253544	-0.505231
Chek1	1.40623	-0.771107	-0.822417	-0.389015	-0.822417	2.55452	1.68021	-0.163651	0.819059	1.1713	-0.758518	-0.496139	-0.822417	-0.762302	-0.185527	0.273224	-0.255104	-0.0786444	-0.754884	-0.822417
Chek2	3.54211	-0.800118	0.205864	-0.663547	-0.676132	0.604606	0.900306	0.160794	0.288319	0.158618	-0.720717	-0.787951	-0.445734	-0.487066	0.146427	-0.0463784	0.469351	0.0171727	-0.901779	-0.964148
Cherp	0.503216	-1.62126	-1.47735	-0.0807837	0.105539	1.93733	2.72802	0.0789765	-0.132915	0.140148	0.467348	-0.118377	0.425068	-0.657574	0.210309	-0.186235	-0.462786	-0.778464	-0.959108	-0.121097
Chfr	-0.737915	-2.08335	-0.22174	0.389034	0.495533	1.60395	2.79849	-0.611577	-0.0566849	-0.746409	0.0171969	-0.524669	-0.625266	0.604168	0.194284	0.183439	0.519378	-0.303265	-0.929814	0.0352173
Chi3l1	-0.415446	-0.332525	-0.401665	-0.448174	-0.426261	-0.413107	-0.402831	-0.429795	-0.32048	-0.409867	-0.392633	-0.41779	-0.262907	-0.349863	-0.429211	-0.436509	-0.440231	1.44681	2.28755	2.99494
Chi3l3	-0.466312	-0.363926	-0.462696	-0.448425	-0.455897	-0.455293	-0.466314	-0.463629	-0.160208	-0.456071	-0.437995	-0.453999	-0.419667	0.540335	-0.429375	-0.0926342	0.407167	3.63296	1.64154	-0.189561
Chic2	-1.14196	-2.35882	-1.53723	-0.85277	0.405718	0.709355	2.10387	1.09279	-0.41445	-0.0254337	0.904772	-0.876149	0.587912	0.145746	0.577188	0.00533615	0.324345	0.208952	-0.19019	0.331027
Chid1	0.373327	-1.06029	-1.06029	3.02612	0.308656	-0.595075	-0.817429	-0.194306	0.655988	0.713774	0.454789	-0.600398	-0.851761	0.2138	0.397377	1.16857	0.441758	-0.631173	-0.883142	-1.06029
Chit1	-0.342614	-0.0736391	-0.342614	-0.342614	-0.342614	-0.342614	-0.342614	-0.342614	1.24757	-0.342614	-0.342614	-0.342614	-0.342614	-0.342614	-0.342614	-0.342614	-0.342614	3.95781	-0.077196	0.0846644
Chka	-1.34924	-1.35216	-1.43738	0.425304	2.3643	0.534353	0.676691	1.35112	-0.463328	0.399956	-0.646233	-0.218809	0.389237	0.1388	1.38452	-0.207176	-0.122894	-0.0622807	-0.497974	-1.30679
Chkb	-1.03085	-1.54578	-0.882339	0.988542	0.658924	0.952099	2.74471	0.764296	-0.805229	-0.401864	0.232245	-0.0856937	0.848374	0.110378	-0.618108	-0.287901	0.660128	-0.561872	-0.886356	-0.853704
Chm	-1.49548	-1.44423	-1.58814	0.961229	0.0808201	-0.130785	-0.0897704	-0.41192	-0.77497	-0.210776	1.52397	1.27242	0.668053	0.340587	-0.38656	-0.296455	-0.0007412	-0.797291	0.633676	2.14636
Chmp1a	-0.159982	-1.92696	-1.73322	-0.435797	-0.231765	-0.134204	-0.722585	2.15662	-0.622011	-0.346984	1.09568	1.22842	0.745071	1.08237	0.433363	0.421234	0.661923	-0.836728	-0.609243	-0.0652056
Chmp1b	0.220262	-1.75321	0.297371	-0.598409	1.21686	1.39634	0.548233	-0.349317	-0.920866	1.01214	2.13762	0.0846106	-0.480199	0.693794	-0.0172428	-0.135516	-0.752315	-1.26583	0.151385	-1.4857
Chmp2a	0.5094	-1.75097	0.132117	1.58065	0.286925	-1.16535	-1.04998	0.588349	-0.774636	-1.26623	0.518941	-0.626569	-1.09681	1.42704	0.488332	0.585235	1.56041	-0.493239	-0.341865	0.888254
Chmp2b	-1.40233	-1.38103	-1.42737	-0.278447	2.34584	0.103276	-0.305469	0.22666	0.236439	0.501726	0.147755	-0.45714	-0.112203	1.62866	1.23357	0.679468	0.553952	-1.01948	-0.701933	-0.571948
Chmp3	2.01434	-1.58187	0.495987	-0.509594	0.268626	-1.00318	-0.512269	-0.39977	-0.672039	-0.615391	-0.0313536	-1.26858	-0.455617	2.06595	0.0707149	0.508557	1.4617	-0.635183	-0.0446354	0.843605
Chmp4b	-0.126117	-1.34592	-0.939953	0.409499	-0.661136	-0.505455	-0.882017	0.309389	-0.813084	0.0989825	2.11165	-0.158195	-0.692124	2.33373	1.26946	0.724321	0.30552	-0.907736	-0.639878	0.109076
Chmp5	-0.093377	-1.88328	0.117305	-1.08537	0.527456	-0.905535	0.0532149	2.30736	-0.777068	-0.740182	0.370395	-0.812549	-0.60368	0.712556	0.252465	0.0645632	0.651267	-0.523213	0.335962	2.03171
Chmp6	-1.26397	-1.62567	-1.81438	-0.644744	0.8855	1.13231	0.822359	0.140357	0.260983	0.929846	1.1665	0.0597047	-0.450363	0.408796	0.902877	0.953473	0.996556	-0.62784	-1.01724	-1.21505
Chmp7	-0.907576	-1.77939	-1.58011	-0.454117	2.16899	0.382408	0.932487	1.58247	0.217933	0.607943	0.0382506	0.329769	0.36939	-0.386118	0.829915	-0.0475564	0.37248	-0.741008	-1.05897	-0.877189
Chn2	-0.450406	-0.561679	-0.561679	-0.374795	-0.561679	-0.508104	-0.451483	3.5635	-0.33896	0.190501	-0.507775	1.10929	-0.561679	-0.300862	0.290214	0.571396	1.09365	-0.516098	-0.561679	-0.561679
Chordc1	-0.406519	-1.387	-1.10559	0.326101	2.13269	2.3223	1.32935	-0.304716	0.185534	0.774308	-0.160421	0.0875997	-0.0406747	-0.481116	0.163171	-0.249149	-0.500567	-0.782597	-0.707949	-1.19474
Chpf	-0.383842	-0.527205	-0.527205	3.37309	-0.527205	0.394487	-0.224145	1.26325	-0.399554	-0.0472256	-0.316136	1.65584	-0.19444	-0.527205	-0.527205	-0.450618	-0.527205	-0.527205	-0.453059	-0.527205
Chpf2	-0.78517	-1.58998	-1.69513	2.48566	-0.741095	-0.890557	-0.775747	0.463056	0.670529	0.458578	1.09448	0.506184	0.207899	0.735753	1.0248	-0.0895164	-0.179542	-0.54268	0.320012	-0.67754
Chpt1	-0.993756	-1.35712	-1.35712	1.01589	-0.646295	0.166552	-0.386154	0.433265	1.74645	1.21796	0.67776	-0.21611	-0.326765	1.52945	-0.546895	1.12812	0.652059	-0.345193	-1.03499	-1.35712
Chrac1	-0.196188	-2.07601	-1.85068	-0.115948	0.545007	0.363852	0.235973	0.439965	0.12436	0.942954	0.820219	0.612514	-0.0735365	0.880817	0.92489	0.761343	1.33434	-1.06411	-1.15079	-1.45896
Chrnb1	-0.408679	-0.408679	-0.408679	3.6732	1.84499	-0.281316	-0.408679	-0.163086	-0.39599	-0.0896355	-0.329193	-0.210656	0.135318	-0.408679	-0.128184	-0.377336	-0.408679	-0.408679	-0.408679	-0.408679
Chst1	-0.228302	-0.228302	-0.228302	4.24835	-0.228302	-0.223763	-0.228302	-0.228302	-0.215628	-0.228302	-0.228302	-0.228302	-0.228302	-0.196651	-0.228302	-0.221118	-0.200661	-0.222606	-0.228302	-0.228302
Chst10	3.52417	0.0636096	1.88063	-0.451909	-0.451909	-0.314292	-0.451909	-0.451909	-0.435027	-0.232367	-0.343011	0.191174	0.584047	-0.399839	-0.451909	-0.451909	-0.451909	-0.451909	-0.451909	-0.451909
Chst12	-1.47227	-1.47664	-1.59402	0.446491	-0.685387	-0.559951	0.383625	0.501708	1.6171	-0.609421	0.750114	-0.951636	-0.903081	0.185883	-0.298838	0.80842	0.36492	1.01381	0.76642	1.71274
Chst13	-0.520949	-0.530739	-0.530739	-0.530739	-0.530739	-0.530739	-0.468032	3.23991	2.1323	-0.457238	-0.530739	-0.530739	-0.429714	-0.281889	-0.530739	-0.0598014	-0.223878	0.333938	0.27554	0.70573
Chst15	-0.976598	-1.03069	-0.773619	-0.209326	2.11474	0.375026	0.893713	1.83904	-0.758194	-0.191105	1.22778	-0.672518	0.819732	-1.0012	0.938562	-0.994457	-0.941623	-0.520253	-0.434041	0.295029
Chst3	-0.482289	-0.529874	-0.310807	-0.245923	2.9961	1.59488	1.39447	-0.529874	-0.511877	-0.397419	-0.362461	-0.512678	1.41393	-0.463832	-0.467879	-0.50436	-0.529874	-0.504056	-0.516305	-0.529874
Chsy1	-0.28087	-0.861388	-1.19866	-1.39853	-0.118911	0.0737032	1.08789	-1.11253	0.224603	0.311115	-0.570428	2.93477	1.23696	0.440307	0.37158	-0.217895	-0.508404	-0.496387	-0.607423	0.690514
Chtf18	1.53952	-0.834522	-0.6565	0.481983	-0.834522	1.17326	3.00416	-0.191001	0.390317	0.0155385	-0.834522	-0.834522	-0.499897	-0.809657	-0.258711	0.306491	0.267509	0.244125	-0.834522	-0.834522
Chtf8	-0.293346	-1.68	-1.85657	-0.158333	0.740847	1.46573	1.72189	0.0917185	0.914477	1.40059	0.263383	0.21115	-0.0996697	-0.550057	0.486715	-0.0669262	-0.0182251	0.0585234	-1.22609	-1.40581
Chuk	0.204117	-1.84833	-0.92169	0.0504475	0.834958	0.139622	1.78863	-0.693483	-0.586603	-0.143661	1.99903	-0.340248	-0.137491	-0.213036	1.6426	0.126369	0.767919	-0.671868	-1.03379	-0.963501
Churc1	0.0377725	-1.94199	-0.964925	0.324742	1.85542	1.06649	0.871636	0.693766	-0.292135	0.601262	0.886467	0.766016	0.0888288	-0.0229258	0.620157	0.0355115	-0.3902	-1.35165	-1.34914	-1.5351
Ciao1	1.09282	-1.43722	0.696078	0.405926	2.23995	0.854286	1.54285	-0.4308	0.173278	0.404274	-0.806231	-0.703486	-0.0965871	0.0114463	-0.17177	0.421596	-0.503057	-0.800848	-1.17709	-1.71541
Ciapin1	1.60515	-1.70033	0.00311323	-0.574059	-0.578775	0.633693	0.512312	1.02137	2.26552	0.990362	0.266802	-0.260355	-0.362363	-0.572621	-0.173885	0.159447	0.242241	-0.725951	-1.48047	-1.2712
Cib1	-0.296578	-1.82665	-0.942108	-1.26141	-0.155936	0.772377	0.712397	-0.266088	-0.496374	-0.54896	2.00942	-1.16114	1.37278	1.23391	0.229477	1.20209	0.663936	-0.674822	-0.248247	-0.318074
Cib2	-0.752565	-0.661788	-0.685361	1.38537	-0.827715	-0.773019	-0.800082	-0.827715	-0.574377	-0.574845	1.24059	-0.757713	-0.455691	0.437768	-0.570421	-0.380021	0.458998	1.24986	2.15775	1.71098
Cic	-0.527498	-1.40042	-1.32258	-0.112479	-0.939604	0.337544	1.51857	-0.493348	-0.923088	0.269833	1.45929	-0.434088	0.757338	0.903656	1.32504	0.958265	1.29165	-0.638123	-1.08402	-0.945931
Ciita	-0.503377	-0.39392	-0.380928	-0.176572	-0.550339	0.229063	-0.0386832	-0.550339	-0.550339	-0.425393	0.72936	-0.406041	2.9128	0.164421	2.58166	-0.51673	-0.486109	-0.537859	-0.550339	-0.550339
Cinp	1.95042	-1.30468	-1.23966	-0.380477	-0.453606	1.25799	0.719645	0.0773192	1.84407	0.941357	-0.765444	-0.668997	-0.165257	-0.227351	-0.6813	0.563384	0.299617	0.617916	-1.14971	-1.23523
Cir1	1.16938	1.56973	3.37428	-0.425962	0.514775	-0.161324	0.0525548	-0.306783	-0.788933	-0.292999	-0.252944	-0.374618	-0.41829	-0.306135	-0.458623	-0.500713	-0.504422	-0.897116	-0.59577	-0.396089
Cirbp	-1.15909	-1.28907	-1.18555	0.519908	0.906055	0.274106	0.394129	0.3034	-0.492216	0.713312	2.13632	1.48561	1.34332	-0.759469	0.415579	-0.589647	-0.345643	-0.481311	-1.05448	-1.13525
Cirh1a	-0.378586	-1.13553	-1.04315	-0.193816	1.53408	1.13051	-0.0488944	-0.542505	2.31025	1.21667	-0.587544	0.906218	0.668613	-0.430505	0.155306	0.217959	-0.838988	-0.585932	-1.11724	-1.23692
Cisd1	0.699262	-1.13959	-1.17574	0.156589	0.579975	2.02731	1.75057	-0.937689	-0.371863	0.715869	-0.148755	-0.626002	-0.416657	0.623287	-0.412949	1.14855	0.818861	-0.988366	-1.1644	-1.13825
Cisd2	1.07343	-1.61359	-1.43796	-0.323937	-0.730337	0.462816	0.358192	0.756167	1.22608	0.149081	-0.323367	-0.486972	-0.211573	1.02466	0.485922	1.47934	1.22561	-0.0395251	-1.47086	-1.60317
Cisd3	-1.08478	-0.799982	-0.915835	0.998791	-0.0360939	-0.526915	-0.781723	1.9522	0.184588	0.179331	0.385286	1.78077	1.78737	0.198135	-0.664015	0.53453	-0.0490656	-1.04585	-0.998199	-1.09855
Cit	2.15096	-0.583132	0.771308	-0.876529	-0.876529	0.385911	2.21829	-0.284048	-0.196121	-0.0235401	-0.840571	-0.466492	-0.876529	-0.851465	0.322763	0.020653	1.64652	0.0749314	-0.839849	-0.876529
Cited2	-1.69133	-1.75371	-1.78411	1.50679	0.0876905	-0.25151	0.0108222	1.57775	1.35239	0.560642	-0.607432	0.0207936	-0.154927	0.614652	-0.529224	-0.241355	-0.322	1.19644	0.503036	-0.0954043
Cited4	3.85242	-0.44917	0.318207	0.0146507	-0.44917	-0.438739	-0.326572	-0.44917	0.435668	1.22909	-0.352496	-0.223102	-0.44917	-0.304348	-0.44917	-0.295047	-0.371678	-0.414377	-0.428648	-0.44917
Ciz1	-0.120257	-1.80737	-1.381	-0.413822	1.34142	0.666363	1.56809	0.0301802	0.255723	1.14289	1.00139	-0.779639	-0.566976	0.586706	0.309822	0.756629	0.64551	-0.411222	-1.25999	-1.56445
Ckap2	1.64392	-0.771324	0.351874	-0.801707	-0.348291	0.857945	2.73983	-0.178607	-0.342785	-0.415491	-0.748432	-0.497106	-0.680433	-0.777207	0.286814	-0.2757	1.70972	-0.160226	-0.791089	-0.801707
Ckap2l	1.79103	-0.668046	-0.487245	-0.714983	-0.714983	0.545949	2.95103	-0.274979	-0.10735	-0.248413	-0.694456	-0.639441	-0.70772	-0.684788	0.757873	-0.146373	1.19326	0.25351	-0.688884	-0.714983
Ckap4	-0.75024	-0.643577	-0.720487	2.82189	-0.62389	-0.659589	-0.697992	-0.220442	0.0577569	-0.450321	-0.589896	-0.724704	-0.319532	-0.34158	-0.486368	0.0350401	-0.108168	1.41291	1.73827	1.27091
Ckap5	0.980051	-0.864049	-0.447797	-0.947866	-0.0122812	0.578403	3.10109	-0.368407	-0.342905	-0.33192	-0.559744	-0.514129	-0.432324	-0.696312	0.981974	-0.168302	1.46188	0.265611	-0.760364	-0.92261
Ckb	-0.452522	-0.264647	-0.464124	0.424406	-0.460237	-0.493728	-0.442013	-0.316872	-0.475219	-0.328756	-0.442556	-0.00164895	-0.423644	1.09655	3.77679	0.856905	-0.232469	-0.43447	-0.443635	-0.478108
Cklf	-0.997655	-1.2741	-1.4776	-0.74203	-0.651751	-0.617018	0.400867	0.57895	-0.459189	-0.661855	-0.278415	-0.293232	-0.192982	0.504129	0.0564368	-0.0307721	0.958193	1.03929	1.48824	2.65048
Cks1b	1.02044	-0.934889	-0.31279	-0.610867	-0.825546	0.762761	2.52235	0.590018	0.552483	-0.00648702	-0.820672	-0.893211	-0.931693	-0.943242	0.895662	0.446536	1.48133	-0.0394776	-0.948062	-1.00464
Cks2	1.67616	-0.880432	-0.671474	-0.847519	-0.839074	0.220713	2.53152	0.726525	0.533135	-0.315394	-0.850913	-0.872988	-0.814218	-0.742928	0.442317	-0.187587	1.42121	0.688814	-0.661372	-0.55649
Clasp1	-0.281734	-1.32302	-1.38046	-0.337468	2.45856	0.823193	2.11376	-0.398914	-0.428876	-0.0968809	-0.0462737	-0.259435	1.26457	-0.67237	0.0500531	-0.39024	0.537401	-0.234709	-0.618954	-0.778212
Clasrp	-0.319974	-1.53179	-1.58683	-1.35252	1.38628	0.459036	1.30187	0.681141	0.186582	1.5149	0.318316	-0.404469	1.10497	-0.258165	0.201236	0.134565	0.686671	0.0443584	-0.96248	-1.6037
Clcc1	0.0114868	-1.63008	-1.41674	-0.948761	1.35657	0.204376	0.482517	-0.497588	0.807716	0.683451	1.61492	-0.281442	0.269631	0.527783	0.196412	1.51125	0.606742	-0.863325	-1.25559	-1.37933
Clcn3	1.74286	-0.227781	3.69995	0.327578	-0.341011	-0.289855	-0.157655	-0.514068	-0.381073	-0.251614	-0.19766	-0.286567	-0.26985	-0.361127	-0.220908	-0.435845	-0.375683	-0.462469	-0.487815	-0.509408
Clcn4-2	-0.656296	-1.49113	-1.21875	0.662871	2.25393	0.570176	-0.0203673	-0.316671	-0.410031	0.32679	1.62186	0.325756	-0.374808	0.975686	0.687948	0.300034	0.22908	-0.890965	-1.08021	-1.4949
Cldn1	-0.421007	-0.421007	-0.421007	-0.421007	-0.421007	-0.421007	-0.421007	0.119727	-0.272838	-0.358082	-0.421007	-0.202955	-0.421007	-0.268903	-0.213516	-0.371138	-0.421007	2.5596	3.18767	0.0305111
Cldn10	-0.133659	-0.371372	-0.12637	-0.371372	-0.371372	1.1089	3.99166	-0.371372	-0.371372	-0.200318	-0.371372	-0.0492052	0.15608	-0.371372	-0.371372	-0.334752	-0.371372	-0.371372	-0.32725	-0.371372
Cldn13	2.9751	-0.13823	2.86632	-0.34199	-0.326633	-0.33278	-0.335937	-0.34199	-0.330028	-0.335892	-0.337136	-0.337678	-0.34199	-0.338258	-0.322009	-0.33723	-0.332225	-0.330043	-0.339382	-0.34199
Cldn15	-0.491562	-0.436412	-0.475347	-0.46262	-0.521786	-0.507033	-0.452337	-0.503734	3.2847	-0.477135	-0.470385	-0.484515	-0.447062	-0.363288	-0.467463	-0.00580825	-0.11195	1.86408	1.24423	0.285429
Cldn25	-0.549333	-1.00228	-1.05559	-0.100544	0.364793	-0.427715	-0.469533	0.212541	-0.207205	0.481825	2.61824	0.13395	-0.508281	0.206848	2.35932	0.459908	0.306506	-0.875416	-1.0105	-0.937528
Cldn7	-0.235922	-0.235922	-0.235922	4.24571	-0.235922	-0.11123	-0.235922	-0.235922	-0.235922	-0.123814	-0.235922	-0.235922	-0.235922	-0.235922	-0.235922	-0.235922	-0.235922	-0.235922	-0.235922	-0.235922
Clec10a	-0.403157	-0.357454	-0.419149	-0.385001	-0.419149	-0.405234	-0.419149	-0.419149	-0.369393	-0.247448	3.36719	-0.419149	-0.419149	0.355356	2.27452	-0.0151251	-0.0719627	-0.402343	-0.405908	-0.419149
Clec12a	-0.863165	-0.708593	-0.88236	-0.785195	-0.807786	-0.853992	-0.911523	0.82786	2.94099	-0.365918	1.04963	-0.874961	-0.733838	0.650436	0.140449	0.23534	-0.0678466	1.11601	0.69451	0.199949
Clec2d	-1.36311	-1.28181	-1.30743	0.655122	0.702952	0.560277	0.831506	0.888497	-0.808937	0.532832	1.9615	0.685796	1.67306	-0.320289	0.199372	-0.884963	-0.925512	-0.874449	-0.607541	-0.31687
Clec2g	-0.230802	-0.230802	-0.230802	4.24679	-0.230802	-0.230802	-0.230802	-0.230802	-0.220579	-0.230802	-0.230802	-0.230802	-0.230802	-0.102579	-0.230802	-0.230802	-0.230802	-0.230802	-0.230802	-0.230802
Clec2i	-0.66032	-0.640856	-0.764663	-0.179726	-0.352233	-0.412624	-0.354829	-0.384323	-0.786146	0.01767	1.62317	2.05768	1.56834	1.95143	0.78802	-0.386775	-0.553454	-0.803491	-0.863434	-0.863434
Clec4a1	-0.313609	-0.164531	-0.335063	-0.174499	-0.319047	-0.347847	-0.330544	-0.364525	-0.354907	-0.358959	-0.33375	-0.319212	-0.364525	4.12941	0.367687	0.332297	0.218235	-0.24376	-0.358326	-0.364525
Clec4a2	-0.708102	-0.510665	-0.687404	-0.614716	-0.730948	-0.71796	-0.718462	-0.716913	0.648513	-0.692549	-0.676167	-0.687356	-0.536908	0.925816	-0.492316	0.316357	0.741931	1.9754	1.92689	1.95556
Clec4a3	-0.314283	-0.260939	-0.357374	-0.222626	-0.357374	-0.337987	-0.320462	-0.305583	-0.343377	-0.352691	-0.318935	-0.34206	-0.334765	4.12226	0.535365	0.21746	0.201335	-0.268072	-0.338202	-0.301693
Clec4b1	-0.477204	-0.212584	-0.502188	0.0320692	-0.502188	-0.502188	-0.502188	-0.439789	-0.46024	-0.453464	-0.502188	-0.502188	-0.394117	1.27691	3.5433	0.95015	0.909729	-0.433477	-0.416458	-0.411698
Clec4b2	-0.337821	-0.337821	-0.337821	-0.337821	-0.337821	-0.337821	-0.337821	-0.337821	3.6489	-0.337821	-0.337821	-0.337821	-0.337821	-0.337821	-0.337821	-0.271068	-0.337821	1.944	0.0833078	-0.337821
Clec4d	-0.301997	-0.214128	-0.318663	-0.182089	-0.310053	-0.301851	-0.280868	-0.292335	-0.221753	-0.147521	-0.219131	-0.215938	0.0053182	-0.121975	-0.258893	-0.235137	-0.216835	-0.279133	-0.121879	4.23486
Clec4e	-0.425974	-0.334637	-0.291798	-0.427864	-0.427864	-0.41903	-0.396952	-0.142798	-0.311635	-0.301382	-0.312566	-0.376149	-0.0636118	0.215132	-0.404627	-0.243406	-0.133672	-0.194083	0.966562	4.02635
Clec5a	-0.631193	-0.51073	-0.627155	-0.621872	-0.654821	-0.637796	-0.622831	-0.622086	0.842405	-0.608076	-0.628012	-0.619184	-0.485766	0.0164317	-0.598217	0.514762	0.320509	2.2632	1.52895	2.38148
Clec7a	-0.535511	-0.372591	-0.471979	-0.444094	-0.553048	-0.483665	-0.476569	-0.470714	-0.358263	-0.466395	-0.440786	-0.404373	-0.349933	3.69776	0.486721	0.912276	0.788318	-0.415829	-0.428349	0.78703
Clec9a	-0.315955	-0.315673	-0.379944	-0.379944	-0.379944	-0.379944	-0.334424	-0.379944	-0.359728	0.00313294	2.661	-0.379944	-0.379944	-0.347421	3.14221	-0.248011	-0.14169	-0.354339	-0.349549	-0.379944
Clic1	-1.30688	-1.41795	-1.46597	-1.15173	1.89483	0.634965	1.67489	0.562674	-0.328429	-0.123009	-0.342777	-0.366381	-0.212251	0.129335	0.788556	0.62475	1.60637	-0.11761	-0.715972	-0.367407
Clic4	2.06059	-0.908351	-0.600327	2.33108	1.23173	0.0503668	0.23419	-0.78723	-0.669728	-0.00139051	1.18989	-0.845476	-0.155903	-0.507359	0.710894	-0.488426	-0.339296	-0.542797	-0.977292	-0.985167
Clic5	-0.391739	-0.415593	-0.415593	0.901183	3.83981	0.929429	-0.159278	-0.17554	-0.389747	0.407638	-0.415593	-0.415593	-0.415593	-0.415593	-0.415593	-0.390229	-0.415593	-0.415593	-0.415593	-0.415593
Clint1	-1.17781	-1.58213	-1.77858	0.187956	2.58966	0.179788	1.16906	0.597858	-0.355329	0.92078	0.0359918	-0.319143	-0.380733	0.399309	0.4125	0.423846	0.541721	-0.545716	-0.302051	-1.01697
Clip1	-1.04724	-1.63065	-1.60624	0.23244	0.405493	0.00097252	-0.0393786	0.924298	-0.725274	0.622005	-0.779104	0.0275015	-0.804682	0.614858	0.335056	0.56696	0.0812092	-0.34483	0.265956	2.90065
Clk1	0.206636	-2.0072	1.89246	-0.964758	2.16947	0.295336	0.595348	0.0989656	-1.17678	-0.0809804	0.84841	-0.481399	0.750355	0.0335426	0.0866073	-0.897861	-0.157414	-1.21129	-0.150606	0.151166
Clk2	-0.278743	-1.4283	-1.9478	0.0528063	0.553961	-0.447386	1.16943	-0.152976	-0.377551	2.02307	1.66876	0.836125	0.922101	-0.361357	-0.0753752	-0.770292	0.628696	-0.530953	-0.976441	-0.507773
[truncated: 7,476 more rows]

## Sheet: Lung
Supplementary File 12B. The preferential expression of genes in cell types of lung.
Gene symbol	ciliated epithelial cell	pulmonary ionocyte; type II pneumocyte	pulmonary artery endothelial cell	capillary endothelial cell	pericyte cell	B cell	neutrophil	alveolar macrophage	classical monocyte	non-classical monocyte	lymphocyte	myofibroblast cell	fibroblast	fibroblast
0610007C21Rik	-0.477111	-0.74447	0.606847	0.710034	1.38957	-0.922756	-1.09653	-0.934289	-0.452924	-0.908438	-0.832658	0.806053	1.55939	1.29727
0610007L01Rik	0.441336	1.43294	1.80594	0.801949	0.660258	-0.917472	-1.70659	-0.0812785	-0.932126	-0.992701	-0.0372502	-0.833023	0.314852	0.0431728
0610007N19Rik	-0.646298	0.179949	-0.335636	-0.68342	-0.0809301	-0.464227	-0.317817	-0.631533	-0.624913	-0.523159	-0.6575	0.339224	2.4989	1.94736
0610007P14Rik	-0.594417	-0.372155	1.66465	-1.45018	-0.443636	-0.206528	-1.09355	-0.975468	-0.0658452	-0.465612	0.361562	1.14683	0.762785	1.73157
0610007P22Rik	0.839031	-0.67102	1.43235	0.774591	-0.777345	0.107575	-1.77875	-0.980246	-0.568601	-1.21371	1.38242	0.637409	0.351056	0.465243
0610009B22Rik	1.52538	1.22111	-0.347766	0.420922	-0.369005	1.73969	-0.837861	-0.23785	-0.484695	-1.2883	-1.36677	-0.646711	0.863234	-0.191374
0610009D07Rik	0.723463	-1.88666	-0.580048	0.220184	-1.61472	-0.525698	0.0862122	1.07337	0.801599	1.46349	1.10737	-0.170578	-0.669677	-0.0283044
0610009L18Rik	1.67408	0.509577	0.23104	0.765628	-1.14238	-1.14238	-1.14238	-0.164198	-0.332924	-0.889461	-0.601788	-0.207716	1.95119	0.491702
0610009O20Rik	-0.381902	-0.882573	1.87939	1.58601	0.78266	-0.0824916	-0.0695639	-1.18306	-0.739137	-1.12515	-0.912735	1.01117	0.464361	-0.346975
0610010F05Rik	2.50115	0.0339041	1.44828	-0.283588	0.155259	-1.17824	-1.17824	0.430551	-0.671985	-0.628378	-0.303999	-0.731964	0.30765	0.0995952
0610010K14Rik	0.039865	-1.00377	1.45111	2.30942	0.717792	-0.778022	0.463068	-0.685372	-0.425455	0.308469	0.144502	-0.828377	-1.24143	-0.471809
0610010O12Rik	3.31072	0.673049	-0.428405	-0.428405	-0.428405	-0.428405	-0.428405	-0.428405	-0.308416	-0.428405	-0.285783	0.0290253	-0.343413	-0.0763499
0610011F06Rik	2.75473	0.314464	-0.182788	0.313494	0.131764	0.282516	-1.32592	-1.17753	-0.63117	-0.908402	0.199931	-0.0408885	0.699475	-0.429671
0610011L14Rik	1.5869	0.511258	0.383645	0.730497	-0.573709	1.86353	-1.79184	-1.34316	-0.214347	0.191685	-0.606498	-0.433091	-0.0139952	-0.290863
0610012G03Rik	1.11407	-0.666283	1.56779	1.45946	-1.2106	-0.514691	-0.222905	0.850664	0.521903	-0.89769	-0.287678	-1.74257	-0.0980159	0.126546
0610030E20Rik	-0.125372	-0.886916	-0.638609	-0.431364	1.18153	0.375958	-0.989089	-1.74857	-0.968382	0.434347	0.307595	0.967262	0.671435	1.85018
0610031J06Rik	-0.697407	-0.75515	2.06194	0.807233	1.08308	-0.517623	-1.71912	0.252333	-0.285417	-0.915478	0.871672	-0.805182	0.483851	0.135259
0610037L13Rik	0.101808	-0.501508	2.02592	1.54967	0.900901	-0.512593	-1.06166	-0.885289	-0.727964	-1.18121	-0.82676	0.00303938	0.468301	0.647348
0610037P05Rik	-1.1728	-0.395818	2.17541	0.763296	-1.02479	-0.599131	-0.0371957	-0.710858	-1.2572	-0.600062	0.856328	1.00591	0.663221	0.333694
0610040J01Rik	1.48032	2.7455	-0.532473	-0.532473	-0.532473	-0.532473	-0.532473	-0.258762	0.867225	-0.190707	-0.532473	-0.532473	-0.383784	-0.532473
0910001L09Rik	0.340849	-0.960497	-1.0677	-0.050922	-1.29414	-0.51069	1.42615	1.16701	2.05754	0.0467193	0.526362	-0.46257	-0.512493	-0.70562
1100001G20Rik	-0.377719	-0.337081	-0.343629	-0.354211	-0.377719	-0.377719	3.189	1.12801	-0.353042	-0.310113	-0.369633	-0.370418	-0.373239	-0.372488
1110001A16Rik	1.69391	1.0737	1.54422	0.336235	-1.33615	-0.623777	-0.997922	-0.512641	-0.959916	-1.24161	0.447491	0.446899	-0.231636	0.361185
1110001J03Rik	-0.247089	0.478732	0.183654	-0.423354	-0.15105	-0.288501	-1.59709	-0.92084	-0.688727	-0.921285	0.978866	2.40738	0.272059	0.917242
1110002B05Rik	0.822496	-1.95639	1.52149	1.1723	0.373074	-0.101775	-1.18407	-0.666124	-0.520701	-1.01044	-0.192203	1.05931	0.089452	0.593576
1110002L01Rik	1.1599	0.0443639	-0.396151	2.56316	-0.805068	-0.805068	-0.805068	-0.518953	-0.429279	-0.592481	-0.243766	1.39708	-0.328914	-0.239752
1110002N22Rik	2.77064	-0.606681	-0.419541	0.368919	0.533145	-1.13599	-1.13599	-0.0947713	-0.466827	-0.12247	-0.290288	0.464421	0.851033	-0.715599
1110003E01Rik	1.12974	-0.48953	-0.998048	0.704981	0.0122141	1.86966	-1.06146	-1.27122	-0.22212	-0.716681	-1.15589	0.568907	0.496728	1.13272
1110004E09Rik	3.4621	-0.176351	-0.0761294	-0.158515	-0.368713	-0.368713	-0.246206	-0.329582	-0.311155	-0.347579	-0.233426	-0.272717	-0.284764	-0.288255
1110004F10Rik	-0.169103	-0.704052	0.960532	0.286321	1.9789	-0.446484	-1.91863	-0.531508	-0.57609	-1.04964	0.00898517	1.17746	0.702038	0.281276
[truncated: 10,885 more rows]

## Sheet: Skeletal muscle
Supplementary File 12C. The preferential expression of genes in cell types of skeletal muscle.
[truncated: 9,466 more rows]

[truncated: 3 more sheets: Spleen, Tongue, Trachea]
