# Supplementary material for: Affected cell types for hundreds of Mendelian diseases revealed by analysis of human and mouse single-cell data
Source: eLife. 2024 Jan 10;13:e84613. doi: 10.7554/eLife.84613 (PMC10830129; doi:10.7554/eLife.84613)
Supplement: Supplementary file 13. [file elife-84613-supp13.xlsx]

## Sheet: Supplementary File 13
Supplementary File 13. Summary of PrEDiCT scores.
Tissue	Mean PrEDiCT scores	Standard deviation of PrEDiCT scores
Bone marrow	-0.01	0.93
Lung	-0.01	0.93
Skeletal muscle	-0.01	0.93
Spleen	-0.01	0.95
Tongue	0	0.92
Trachea	0	0.93
All combined	-0.01	0.93
